# Supplementary material
Source: PubMed Central journal article supplement (PMC11072169)

### CD8<sup>+</sup> OT-I T Cell Proliferation

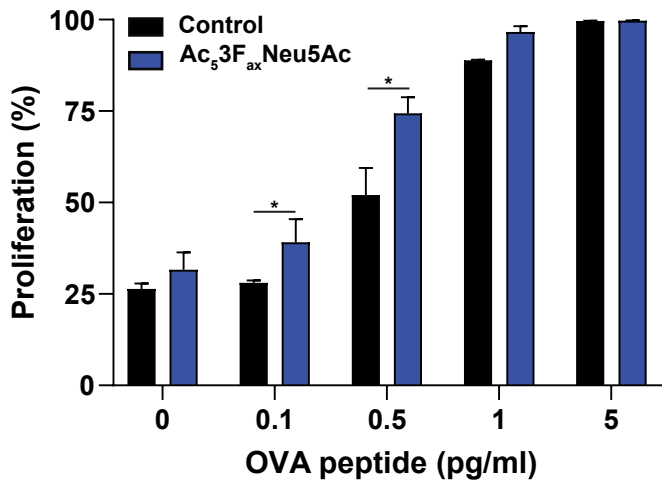

### CD8<sup>+</sup> OT-I T Cell IFN $\gamma$ Production

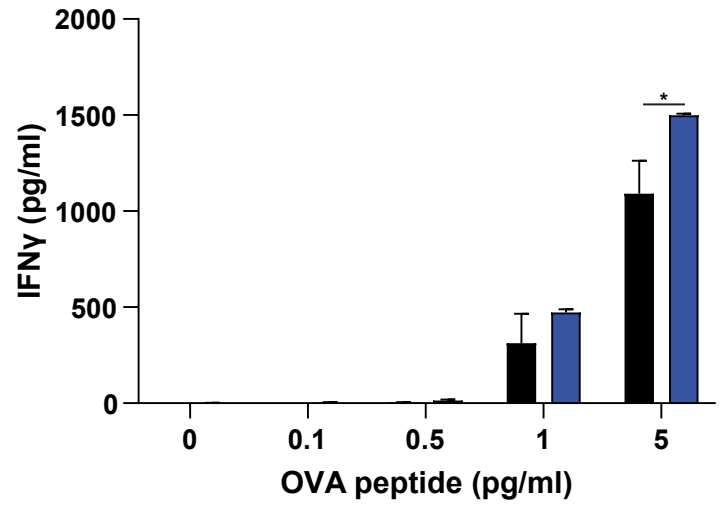

Supplement: 18_2021_4027_MOESM2_ESM.pdf [file 18_2021_4027_MOESM2_ESM.pdf]
