# Supplementary material
Source: PubMed Central journal article supplement (PMC11072169)

**A**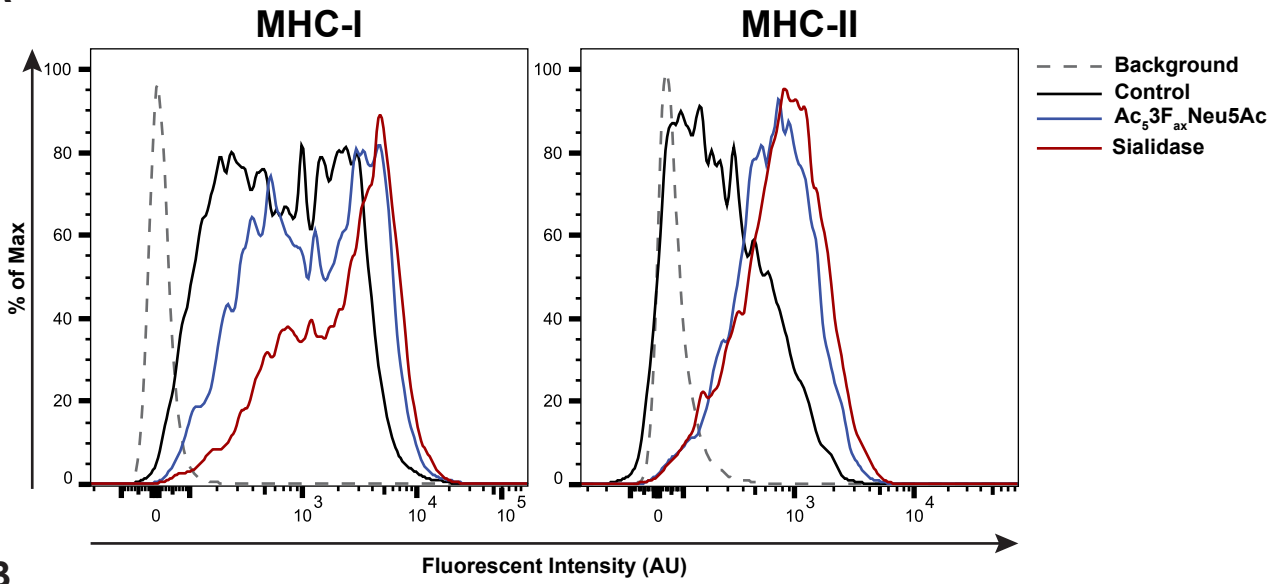**B**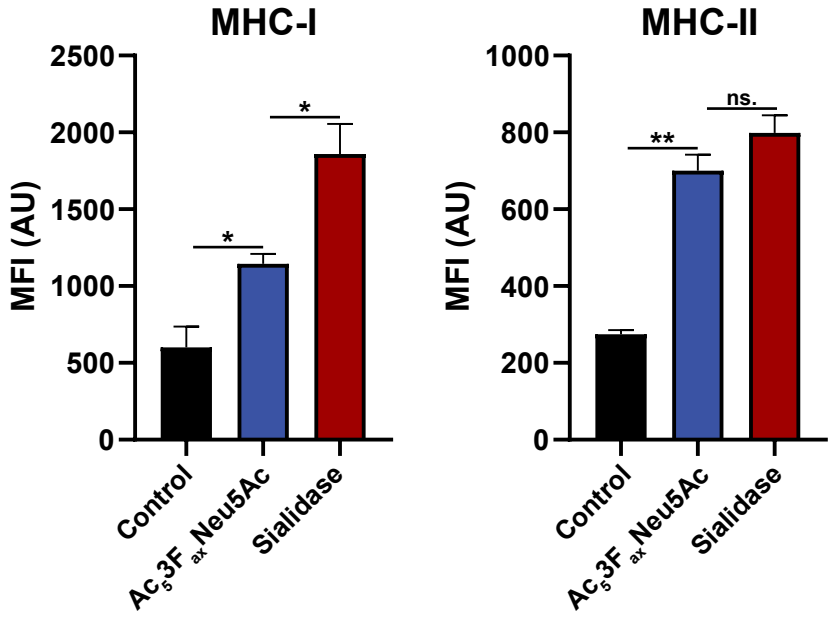

Supplement: 18_2021_4027_MOESM3_ESM.pdf [file 18_2021_4027_MOESM3_ESM.pdf]
