# Supplementary material
Source: PubMed Central journal article supplement (PMC11072169)
Supplement: 18_2021_4027_MOESM5_ESM.pdf [file 18_2021_4027_MOESM5_ESM.pdf]

| ensembl_gene_id    | logFC     | logCPM       | LR       | PValue   | FDR      | external_gene_name | Fold_Change | significant(FDR<0.05) |
|--------------------|-----------|--------------|----------|----------|----------|--------------------|-------------|-----------------------|
| ENSMUSG00000000001 | -1,75E-01 | 8,181319464  | 9,15E+00 | 2,49E-03 | 3,32E-02 | Gnai3              | 0,89        | Yes                   |
| ENSMUSG00000000028 | 8,68E-02  | 4,11340038   | 9,95E-01 | 3,19E-01 | 6,19E-01 | Cdc45              | 1,06        | No                    |
| ENSMUSG00000000031 | 1,81E+00  | -3,10765737  | 1,28E+00 | 2,58E-01 | 5,50E-01 | H19                | 3,49        | No                    |
| ENSMUSG00000000049 | 2,75E-02  | -1,378340174 | 2,47E-03 | 9,60E-01 | 1,00E+00 | Apoh               | 1,02        | No                    |
| ENSMUSG00000000056 | 1,13E-01  | 5,651934962  | 2,80E+00 | 9,45E-02 | 3,85E-01 | Narf               | 1,08        | No                    |
| ENSMUSG00000000058 | 3,73E-01  | 6,953093161  | 3,73E+01 | 1,03E-09 | 8,36E-08 | Cav2               | 1,30        | Yes                   |
| ENSMUSG00000000078 | 1,16E-02  | 9,551376133  | 4,22E-02 | 8,37E-01 | 9,81E-01 | Klf6               | 1,01        | No                    |
| ENSMUSG00000000085 | -1,30E-01 | 4,241792863  | 2,39E+00 | 1,22E-01 | 4,36E-01 | Scmh1              | 0,91        | No                    |
| ENSMUSG00000000088 | -6,34E-02 | 6,690890836  | 1,05E+00 | 3,06E-01 | 6,03E-01 | Cox5a              | 0,96        | No                    |
| ENSMUSG00000000093 | -8,99E-01 | -1,448582065 | 2,73E+00 | 9,83E-02 | 3,91E-01 | Tbx2               | 0,54        | No                    |
| ENSMUSG00000000120 | 1,27E+00  | -2,548168699 | 1,00E+00 | 3,17E-01 | 6,17E-01 | Ngfr               | 2,42        | No                    |
| ENSMUSG00000000125 | -1,87E+00 | -3,107637761 | 1,39E+00 | 2,38E-01 | 5,50E-01 | Wnt3               | 0,27        | No                    |
| ENSMUSG00000000126 | 1,91E+00  | -1,289628039 | 1,13E+01 | 7,78E-04 | 1,31E-02 | Wnt9a              | 3,76        | Yes                   |
| ENSMUSG00000000127 | 1,04E-01  | 0,633479095  | 1,83E-01 | 6,69E-01 | 8,87E-01 | Fer                | 1,07        | No                    |
| ENSMUSG00000000131 | -8,13E-02 | 6,67713327   | 1,72E+00 | 1,89E-01 | 5,50E-01 | Xpo6               | 0,95        | No                    |
| ENSMUSG00000000142 | -1,37E+00 | -2,655113917 | 1,18E+00 | 2,77E-01 | 5,73E-01 | Axin2              | 0,39        | No                    |
| ENSMUSG00000000148 | 9,23E-02  | 4,777312769  | 1,47E+00 | 2,25E-01 | 5,50E-01 | Brat1              | 1,07        | No                    |
| ENSMUSG00000000149 | 6,09E-02  | 6,356978578  | 9,19E-01 | 3,38E-01 | 6,38E-01 | Gna12              | 1,04        | No                    |
| ENSMUSG00000000154 | -4,24E-05 | 2,477193902  | 1,09E-07 | 1,00E+00 | 1,00E+00 | Slc22a18           | 1,00        | No                    |
| ENSMUSG00000000157 | -8,61E-01 | 1,935629181  | 3,30E+01 | 9,30E-09 | 6,50E-07 | Itgb2l             | 0,55        | Yes                   |
| ENSMUSG00000000159 | 6,02E-02  | -2,126668009 | 6,05E-03 | 9,38E-01 | 1,00E+00 | Igsf5              | 1,04        | No                    |
| ENSMUSG00000000167 | 5,56E-03  | -0,863779102 | 1,92E-04 | 9,89E-01 | 1,00E+00 | Pih1d2             | 1,00        | No                    |
| ENSMUSG00000000168 | 1,39E-01  | 5,810289666  | 4,34E+00 | 3,72E-02 | 2,29E-01 | Dlat               | 1,10        | No                    |
| ENSMUSG00000000171 | 3,47E-03  | 7,549630186  | 3,44E-03 | 9,53E-01 | 1,00E+00 | Sdhd               | 1,00        | No                    |
| ENSMUSG00000000182 | -2,90E-01 | 0,010769698  | 9,00E-01 | 3,43E-01 | 6,43E-01 | Fgf23              | 0,82        | No                    |
| ENSMUSG00000000183 | -1,89E+00 | -3,1076441   | 1,42E+00 | 2,33E-01 | 5,50E-01 | Fgf6               | 0,27        | No                    |
| ENSMUSG00000000184 | -7,83E-01 | 8,234256201  | 1,81E+02 | 2,32E-41 | 3,02E-38 | Ccnd2              | 0,58        | Yes                   |
| ENSMUSG00000000194 | -8,88E-02 | 6,13123891   | 1,90E+00 | 1,68E-01 | 5,23E-01 | Gpr107             | 0,94        | No                    |
| ENSMUSG00000000202 | 3,53E-01  | 0,273945855  | 1,74E+00 | 1,87E-01 | 5,50E-01 | Btbd17             | 1,28        | No                    |
| ENSMUSG00000000204 | -2,41E-01 | 1,738989451  | 2,23E+00 | 1,35E-01 | 4,63E-01 | Slfn4              | 0,85        | No                    |
| ENSMUSG00000000244 | 1,19E-01  | 5,135025123  | 2,67E+00 | 1,02E-01 | 3,95E-01 | Tspan32            | 1,09        | No                    |

|                    |           |              |          |          |          |          |      |     |
|--------------------|-----------|--------------|----------|----------|----------|----------|------|-----|
| ENSMUSG00000000247 | -4,03E-01 | -0,641482997 | 1,22E+00 | 2,69E-01 | 5,65E-01 | Lhx2     | 0,76 | No  |
| ENSMUSG00000000248 | 2,61E-01  | 0,202784655  | 1,01E+00 | 3,14E-01 | 6,15E-01 | Clec2g   | 1,20 | No  |
| ENSMUSG00000000253 | 2,47E-01  | 4,092985592  | 7,91E+00 | 4,93E-03 | 5,54E-02 | Gmpr     | 1,19 | No  |
| ENSMUSG00000000263 | 1,16E+00  | -2,832034382 | 6,51E-01 | 4,20E-01 | 7,15E-01 | Gira1    | 2,23 | No  |
| ENSMUSG00000000275 | -1,04E-01 | 7,678322582  | 3,11E+00 | 7,77E-02 | 3,56E-01 | Trim25   | 0,93 | No  |
| ENSMUSG00000000276 | -9,48E-02 | 5,012243647  | 1,62E+00 | 2,04E-01 | 5,50E-01 | Dgke     | 0,94 | No  |
| ENSMUSG00000000278 | -5,53E-02 | 7,399701047  | 8,63E-01 | 3,53E-01 | 6,54E-01 | Scpep1   | 0,96 | No  |
| ENSMUSG00000000282 | 1,23E-02  | 6,008539884  | 3,53E-02 | 8,51E-01 | 9,90E-01 | Mnt      | 1,01 | No  |
| ENSMUSG00000000290 | 1,42E-01  | 10,67574807  | 6,43E+00 | 1,12E-02 | 1,02E-01 | Itgb2    | 1,10 | No  |
| ENSMUSG00000000295 | 3,97E-02  | 2,564597266  | 9,29E-02 | 7,61E-01 | 9,37E-01 | Hddc2    | 1,03 | No  |
| ENSMUSG00000000296 | -6,05E-01 | -2,83199595  | 2,89E-01 | 5,91E-01 | 8,42E-01 | Tpd52l1  | 0,66 | No  |
| ENSMUSG00000000301 | -4,73E-02 | 0,489976317  | 3,59E-02 | 8,50E-01 | 9,89E-01 | Pemt     | 0,97 | No  |
| ENSMUSG00000000303 | 2,51E-01  | 8,222098482  | 1,87E+01 | 1,54E-05 | 4,90E-04 | Cdh1     | 1,19 | Yes |
| ENSMUSG00000000305 | -4,08E-02 | -2,89610675  | 1,04E-03 | 9,74E-01 | 1,00E+00 | Cdh4     | 0,97 | No  |
| ENSMUSG00000000308 | -9,41E-01 | -1,378244425 | 3,58E+00 | 5,84E-02 | 2,98E-01 | Ckmt1    | 0,52 | No  |
| ENSMUSG00000000317 | -7,91E-02 | -2,448704688 | 8,71E-03 | 9,26E-01 | 1,00E+00 | Bcl6b    | 0,95 | No  |
| ENSMUSG00000000318 | 4,42E-01  | 7,002355747  | 5,20E+01 | 5,63E-13 | 7,09E-11 | Clec10a  | 1,36 | Yes |
| ENSMUSG00000000320 | -1,02E+00 | -1,711687383 | 2,68E+00 | 1,02E-01 | 3,94E-01 | Alox12   | 0,49 | No  |
| ENSMUSG00000000325 | 4,48E-02  | 2,715520169  | 1,35E-01 | 7,14E-01 | 9,12E-01 | Arvcf    | 1,03 | No  |
| ENSMUSG00000000326 | 1,32E-01  | 7,062837901  | 4,72E+00 | 2,98E-02 | 1,98E-01 | Comt     | 1,10 | No  |
| ENSMUSG00000000339 | -1,66E-02 | 4,419808104  | 4,10E-02 | 8,40E-01 | 9,83E-01 | Rtca     | 0,99 | No  |
| ENSMUSG00000000340 | 9,29E-02  | 4,62138579   | 1,38E+00 | 2,40E-01 | 5,50E-01 | Dbt      | 1,07 | No  |
| ENSMUSG00000000346 | -3,61E-02 | 8,443005831  | 3,93E-01 | 5,31E-01 | 8,05E-01 | Dazap2   | 0,98 | No  |
| ENSMUSG00000000359 | 8,34E-01  | 0,330783698  | 9,75E+00 | 1,80E-03 | 2,57E-02 | Rem1     | 1,78 | Yes |
| ENSMUSG00000000365 | -3,35E-01 | -0,006722016 | 1,30E+00 | 2,54E-01 | 5,50E-01 | Rnf17    | 0,79 | No  |
| ENSMUSG00000000374 | -7,95E-03 | 6,75785231   | 1,66E-02 | 8,97E-01 | 1,00E+00 | Trappc10 | 0,99 | No  |
| ENSMUSG00000000378 | -2,52E-02 | 5,483872858  | 1,33E-01 | 7,16E-01 | 9,13E-01 | Ccm2     | 0,98 | No  |
| ENSMUSG00000000384 | 1,23E-01  | 5,985838263  | 3,48E+00 | 6,20E-02 | 3,10E-01 | Tbrg4    | 1,09 | No  |
| ENSMUSG00000000385 | 1,91E+00  | -2,268183397 | 4,44E+00 | 3,52E-02 | 2,22E-01 | Tmprss2  | 3,76 | No  |
| ENSMUSG00000000386 | -4,51E-01 | 8,13368984   | 6,04E+01 | 7,57E-15 | 1,14E-12 | Mx1      | 0,73 | Yes |
| ENSMUSG00000000392 | -2,27E-01 | -1,226212718 | 2,30E-01 | 6,32E-01 | 8,64E-01 | Fap      | 0,85 | No  |
| ENSMUSG00000000394 | -1,94E+00 | -3,107619243 | 1,50E+00 | 2,21E-01 | 5,50E-01 | Gcg      | 0,26 | No  |

|                    |           |              |          |          |          |         |       |      |     |
|--------------------|-----------|--------------|----------|----------|----------|---------|-------|------|-----|
| ENSMUSG00000000399 | 1,20E-01  | 5,261674853  | 2,83E+00 | 9,25E-02 | 3,83E-01 | Ndufa9  |       | 1,09 | No  |
| ENSMUSG00000000409 | -3,19E-01 | -0,460697765 | 8,26E-01 | 3,63E-01 | 6,64E-01 | Lck     |       | 0,80 | No  |
| ENSMUSG00000000411 | 1,57E+00  | -2,226288841 | 2,68E+00 | 1,01E-01 | 3,94E-01 | Tssk3   |       | 2,97 | No  |
| ENSMUSG00000000416 | -7,67E-01 | -2,600663846 | 6,61E-01 | 4,16E-01 | 7,11E-01 | Cttnbp2 |       | 0,59 | No  |
| ENSMUSG00000000420 | 5,39E-02  | 7,547889163  | 8,33E-01 | 3,61E-01 | 6,63E-01 | Galnt1  |       | 1,04 | No  |
| ENSMUSG00000000439 | 7,45E-02  | 5,651503431  | 1,20E+00 | 2,72E-01 | 5,69E-01 | Mkrn2   |       | 1,05 | No  |
| ENSMUSG00000000440 | 2,64E-01  | 3,980533495  | 8,47E+00 | 3,62E-03 | 4,40E-02 | Pparg   |       | 1,20 | Yes |
| ENSMUSG00000000441 | 6,66E-02  | 6,508212728  | 1,13E+00 | 2,88E-01 | 5,84E-01 | Raf1    |       | 1,05 | No  |
| ENSMUSG00000000486 | 1,69E-01  | 1,483580572  | 8,92E-01 | 3,45E-01 | 6,46E-01 |         | 37135 | 1,12 | No  |
| ENSMUSG00000000489 | 1,86E-01  | 4,891067918  | 6,27E+00 | 1,23E-02 | 1,09E-01 | Pdgfb   |       | 1,14 | No  |
| ENSMUSG00000000530 | 3,50E-01  | 5,84397482   | 2,73E+01 | 1,78E-07 | 9,38E-06 | Acvrl1  |       | 1,27 | Yes |
| ENSMUSG00000000531 | -5,02E-01 | 4,119014022  | 3,34E+01 | 7,63E-09 | 5,41E-07 | Grasp   |       | 0,71 | Yes |
| ENSMUSG00000000532 | 1,20E-01  | 5,829464282  | 3,24E+00 | 7,19E-02 | 3,40E-01 | Acvr1b  |       | 1,09 | No  |
| ENSMUSG00000000538 | 1,12E-01  | 5,099323116  | 2,36E+00 | 1,24E-01 | 4,41E-01 | Tom1l2  |       | 1,08 | No  |
| ENSMUSG00000000544 | -5,61E-01 | -2,832027494 | 2,46E-01 | 6,20E-01 | 8,56E-01 | Gpa33   |       | 0,68 | No  |
| ENSMUSG00000000552 | 1,89E-01  | 6,915769716  | 9,54E+00 | 2,01E-03 | 2,82E-02 | Zfp385a |       | 1,14 | Yes |
| ENSMUSG00000000555 | 1,46E-01  | 6,748682203  | 5,61E+00 | 1,79E-02 | 1,40E-01 | Itga5   |       | 1,11 | No  |
| ENSMUSG00000000561 | 2,36E-02  | 4,582230626  | 8,94E-02 | 7,65E-01 | 9,39E-01 | Wdr77   |       | 1,02 | No  |
| ENSMUSG00000000562 | 2,70E-01  | 4,348132907  | 1,05E+01 | 1,22E-03 | 1,90E-02 | Adora3  |       | 1,21 | Yes |
| ENSMUSG00000000563 | -8,32E-02 | 6,92935404   | 1,87E+00 | 1,72E-01 | 5,28E-01 | Atp5f1  |       | 0,94 | No  |
| ENSMUSG00000000567 | 2,60E+00  | -2,963275374 | 2,63E+00 | 1,05E-01 | 3,97E-01 | Sox9    |       | 6,08 | No  |
| ENSMUSG00000000568 | 3,40E-02  | 6,531334506  | 2,95E-01 | 5,87E-01 | 8,40E-01 | Hnrnpd  |       | 1,02 | No  |
| ENSMUSG00000000579 | -1,60E-04 | 3,361828204  | 2,38E-06 | 9,99E-01 | 1,00E+00 | Dynlt1c |       | 1,00 | No  |
| ENSMUSG00000000581 | 7,73E-02  | 5,032271989  | 1,10E+00 | 2,95E-01 | 5,91E-01 | C1d     |       | 1,06 | No  |
| ENSMUSG00000000594 | 1,99E-01  | 9,857856971  | 1,25E+01 | 4,06E-04 | 7,71E-03 | Gm2a    |       | 1,15 | Yes |
| ENSMUSG00000000600 | -1,96E-01 | 5,990314186  | 9,06E+00 | 2,61E-03 | 3,45E-02 | Krit1   |       | 0,87 | Yes |
| ENSMUSG00000000605 | 1,38E-01  | 6,536205683  | 4,88E+00 | 2,72E-02 | 1,86E-01 | Clcn4   |       | 1,10 | No  |
| ENSMUSG00000000617 | -9,59E-01 | -2,770584991 | 8,07E-01 | 3,69E-01 | 6,70E-01 | Grm6    |       | 0,51 | No  |
| ENSMUSG00000000627 | 6,94E-01  | 1,493061941  | 1,29E+01 | 3,35E-04 | 6,63E-03 | Sema4f  |       | 1,62 | Yes |
| ENSMUSG00000000628 | 1,14E-01  | 6,578787797  | 3,33E+00 | 6,80E-02 | 3,28E-01 | Hk2     |       | 1,08 | No  |
| ENSMUSG00000000631 | -3,47E-02 | 6,881098495  | 3,22E-01 | 5,70E-01 | 8,31E-01 | Myo18a  |       | 0,98 | No  |
| ENSMUSG00000000632 | -1,94E+00 | -3,107619243 | 1,50E+00 | 2,21E-01 | 5,50E-01 | Sez6    |       | 0,26 | No  |

|                    |           |              |           |          |          |          |      |     |
|--------------------|-----------|--------------|-----------|----------|----------|----------|------|-----|
| ENSMUSG00000000673 | -1,45E-01 | 4,029543771  | 2,79E+00  | 9,51E-02 | 3,86E-01 | Haa0     | 0,90 | No  |
| ENSMUSG00000000682 | 6,93E-02  | 9,112989329  | 1,49E+00  | 2,22E-01 | 5,50E-01 | Cd52     | 1,05 | No  |
| ENSMUSG00000000686 | 2,09E-01  | 2,989883605  | 3,46E+00  | 6,30E-02 | 3,13E-01 | Abhd15   | 1,16 | No  |
| ENSMUSG00000000690 | 2,63E+00  | -2,96325892  | 2,67E+00  | 1,02E-01 | 3,94E-01 | Hoxb6    | 6,19 | No  |
| ENSMUSG00000000693 | -5,26E-01 | 4,006789733  | 3,61E+01  | 1,89E-09 | 1,48E-07 | Loxl3    | 0,69 | Yes |
| ENSMUSG00000000706 | -4,93E-01 | -2,401345968 | 3,88E-01  | 5,33E-01 | 8,06E-01 | Btn1a1   | 0,71 | No  |
| ENSMUSG00000000708 | 1,13E-01  | 5,160222655  | 2,43E+00  | 1,19E-01 | 4,30E-01 | Kat2b    | 1,08 | No  |
| ENSMUSG00000000711 | 3,65E-03  | 7,197002891  | 3,70E-03  | 9,52E-01 | 1,00E+00 | Rab5b    | 1,00 | No  |
| ENSMUSG00000000724 | -3,59E+00 | -2,600616999 | 5,79E+00  | 1,62E-02 | 1,32E-01 | Cryba1   | 0,08 | No  |
| ENSMUSG00000000730 | -3,77E-02 | 0,422270197  | 2,32E-02  | 8,79E-01 | 1,00E+00 | Dnmt3l   | 0,97 | No  |
| ENSMUSG00000000731 | -2,28E+00 | -1,980466897 | 8,26E+00  | 4,06E-03 | 4,78E-02 | Aire     | 0,21 | Yes |
| ENSMUSG00000000732 | 9,20E-02  | 6,308704884  | 2,11E+00  | 1,47E-01 | 4,85E-01 | Icosl    | 1,07 | No  |
| ENSMUSG00000000738 | -2,62E-02 | 5,567632955  | 1,47E-01  | 7,01E-01 | 9,05E-01 | Spg7     | 0,98 | No  |
| ENSMUSG00000000739 | 9,01E-03  | -3,107646452 | -5,16E-10 | 1,00E+00 | 1,00E+00 | Sult5a1  | 1,01 | No  |
| ENSMUSG00000000740 | -1,59E-01 | 5,638895885  | 5,49E+00  | 1,91E-02 | 1,47E-01 | Rpl13    | 0,90 | No  |
| ENSMUSG00000000743 | 1,34E-02  | 7,121169159  | 4,92E-02  | 8,24E-01 | 9,73E-01 | Chmp1a   | 1,01 | No  |
| ENSMUSG00000000751 | 3,56E-02  | 6,511189026  | 3,24E-01  | 5,69E-01 | 8,30E-01 | Rpa1     | 1,03 | No  |
| ENSMUSG00000000753 | 7,22E-01  | 1,786241379  | 1,70E+01  | 3,64E-05 | 1,04E-03 | Serpinf1 | 1,65 | Yes |
| ENSMUSG00000000759 | -2,11E-02 | 5,485533861  | 9,21E-02  | 7,62E-01 | 9,38E-01 | Tubgcp3  | 0,99 | No  |
| ENSMUSG00000000766 | -6,30E-01 | -1,711617634 | 1,12E+00  | 2,91E-01 | 5,86E-01 | Oprm1    | 0,65 | No  |
| ENSMUSG00000000776 | 2,67E-03  | 4,110616583  | 9,38E-04  | 9,76E-01 | 1,00E+00 | Polr3d   | 1,00 | No  |
| ENSMUSG00000000782 | -1,44E+00 | 3,337298062  | 1,90E+02  | 2,56E-43 | 4,03E-40 | Tcf7     | 0,37 | Yes |
| ENSMUSG00000000791 | -6,58E-01 | 0,01081518   | 4,42E+00  | 3,55E-02 | 2,23E-01 | Il12rb1  | 0,63 | No  |
| ENSMUSG00000000792 | -2,88E-02 | -2,963268425 | 3,79E-04  | 9,84E-01 | 1,00E+00 | Slc5a5   | 0,98 | No  |
| ENSMUSG00000000794 | 2,57E-01  | 4,254929214  | 8,98E+00  | 2,73E-03 | 3,56E-02 | Kcnn3    | 1,20 | Yes |
| ENSMUSG00000000804 | 1,99E-02  | 6,226429903  | 9,63E-02  | 7,56E-01 | 9,35E-01 | Usp32    | 1,01 | No  |
| ENSMUSG00000000805 | 3,77E-01  | 5,184875004  | 2,58E+01  | 3,79E-07 | 1,85E-05 | Car4     | 1,30 | Yes |
| ENSMUSG00000000811 | 6,39E-02  | 2,488355035  | 2,33E-01  | 6,29E-01 | 8,62E-01 | Txnrd3   | 1,05 | No  |
| ENSMUSG00000000817 | 6,96E-01  | -2,832055333 | 2,64E-01  | 6,07E-01 | 8,50E-01 | Fasl     | 1,62 | No  |
| ENSMUSG00000000823 | -8,50E-02 | 5,6298955    | 1,57E+00  | 2,10E-01 | 5,50E-01 | Zfp512b  | 0,94 | No  |
| ENSMUSG00000000826 | -6,52E-02 | 8,15081918   | 1,27E+00  | 2,60E-01 | 5,54E-01 | Dnajc5   | 0,96 | No  |
| ENSMUSG00000000827 | -1,27E-01 | 5,894692139  | 3,74E+00  | 5,33E-02 | 2,82E-01 | Tpd52l2  | 0,92 | No  |

|                    |           |              |          |          |          |         |      |     |
|--------------------|-----------|--------------|----------|----------|----------|---------|------|-----|
| ENSMUSG00000000861 | 5,92E-01  | 1,615766512  | 1,23E+01 | 4,49E-04 | 8,39E-03 | Bcl11a  | 1,51 | Yes |
| ENSMUSG00000000869 | 1,70E-01  | -1,015875471 | 1,62E-01 | 6,87E-01 | 8,98E-01 | Il4     | 1,13 | No  |
| ENSMUSG00000000876 | 1,12E-01  | 4,355013851  | 1,83E+00 | 1,76E-01 | 5,35E-01 | Pxmp4   | 1,08 | No  |
| ENSMUSG00000000884 | 1,70E-01  | 1,491261718  | 9,26E-01 | 3,36E-01 | 6,37E-01 | Gnb1l   | 1,13 | No  |
| ENSMUSG00000000889 | -4,36E-01 | -2,65508115  | 1,94E-01 | 6,60E-01 | 8,82E-01 | Dbh     | 0,74 | No  |
| ENSMUSG00000000901 | 1,65E-01  | 2,440612056  | 1,55E+00 | 2,14E-01 | 5,50E-01 | Mmp11   | 1,12 | No  |
| ENSMUSG00000000902 | 6,00E-02  | 5,774072596  | 8,06E-01 | 3,69E-01 | 6,71E-01 | Smarcb1 | 1,04 | No  |
| ENSMUSG00000000903 | 4,64E-01  | -2,655147743 | 1,68E-01 | 6,82E-01 | 8,94E-01 | Vpreb3  | 1,38 | No  |
| ENSMUSG00000000915 | -1,58E-01 | 4,43589906   | 3,80E+00 | 5,14E-02 | 2,76E-01 | Hip1r   | 0,90 | No  |
| ENSMUSG00000000916 | 1,85E-02  | 3,700736515  | 3,79E-02 | 8,46E-01 | 9,87E-01 | Nsun5   | 1,01 | No  |
| ENSMUSG00000000934 | 2,62E-01  | 2,723929225  | 4,63E+00 | 3,13E-02 | 2,05E-01 | Top1mt  | 1,20 | No  |
| ENSMUSG00000000938 | -1,86E+00 | -3,033612668 | 1,39E+00 | 2,38E-01 | 5,50E-01 | Hoxa10  | 0,28 | No  |
| ENSMUSG00000000942 | -1,59E-01 | -1,697338208 | 5,42E-02 | 8,16E-01 | 9,69E-01 | Hoxa4   | 0,90 | No  |
| ENSMUSG00000000957 | 2,40E-01  | 7,198477646  | 1,59E+01 | 6,81E-05 | 1,76E-03 | Mmp14   | 1,18 | Yes |
| ENSMUSG00000000958 | -7,81E-02 | 5,223607023  | 1,21E+00 | 2,71E-01 | 5,68E-01 | Slc7a7  | 0,95 | No  |
| ENSMUSG00000000959 | -3,36E-02 | 5,559860551  | 2,41E-01 | 6,24E-01 | 8,58E-01 | Oxa1l   | 0,98 | No  |
| ENSMUSG00000000976 | 2,07E-02  | 5,560569372  | 9,10E-02 | 7,63E-01 | 9,38E-01 | Heatr6  | 1,01 | No  |
| ENSMUSG00000000982 | -4,73E-02 | 7,519878311  | 6,24E-01 | 4,29E-01 | 7,23E-01 | Ccl3    | 0,97 | No  |
| ENSMUSG00000000983 | 2,29E-01  | 1,927719628  | 2,15E+00 | 1,42E-01 | 4,76E-01 | Wfdc18  | 1,17 | No  |
| ENSMUSG00000001014 | -6,28E-01 | -1,951864368 | 8,06E-01 | 3,69E-01 | 6,71E-01 | Icam4   | 0,65 | No  |
| ENSMUSG00000001016 | -2,98E-02 | 5,169571286  | 1,71E-01 | 6,79E-01 | 8,93E-01 | Ilf2    | 0,98 | No  |
| ENSMUSG00000001017 | -5,16E-02 | 6,523028749  | 6,80E-01 | 4,10E-01 | 7,06E-01 | Chtop   | 0,96 | No  |
| ENSMUSG00000001018 | -2,98E-02 | 5,769436172  | 1,98E-01 | 6,56E-01 | 8,80E-01 | Snapin  | 0,98 | No  |
| ENSMUSG00000001020 | -9,65E-02 | 8,228362618  | 2,79E+00 | 9,51E-02 | 3,86E-01 | S100a4  | 0,94 | No  |
| ENSMUSG00000001021 | -1,42E+00 | -2,49755461  | 1,67E+00 | 1,96E-01 | 5,50E-01 | S100a3  | 0,37 | No  |
| ENSMUSG00000001023 | -1,15E+00 | -1,03349037  | 7,07E+00 | 7,84E-03 | 7,79E-02 | S100a5  | 0,45 | No  |
| ENSMUSG00000001025 | 2,00E-02  | 8,260764831  | 1,19E-01 | 7,30E-01 | 9,21E-01 | S100a6  | 1,01 | No  |
| ENSMUSG00000001027 | -1,93E+00 | -2,963274349 | 1,47E+00 | 2,25E-01 | 5,50E-01 | Scn4a   | 0,26 | No  |
| ENSMUSG00000001029 | 8,88E-02  | 2,341405269  | 4,17E-01 | 5,19E-01 | 7,98E-01 | Icam2   | 1,06 | No  |
| ENSMUSG00000001034 | -6,18E-04 | 5,499246401  | 8,03E-05 | 9,93E-01 | 1,00E+00 | Mapk7   | 1,00 | No  |
| ENSMUSG00000001036 | -3,80E-01 | -1,929247818 | 3,35E-01 | 5,63E-01 | 8,26E-01 | Epn2    | 0,77 | No  |
| ENSMUSG00000001039 | 2,00E-01  | -2,268092392 | 6,01E-02 | 8,06E-01 | 9,64E-01 | B9d1    | 1,15 | No  |

|                    |           |              |          |          |          |         |      |     |
|--------------------|-----------|--------------|----------|----------|----------|---------|------|-----|
| ENSMUSG00000001052 | -8,65E-02 | 6,566763861  | 1,92E+00 | 1,66E-01 | 5,19E-01 | Sec24b  | 0,94 | No  |
| ENSMUSG00000001053 | 3,97E-01  | 4,919741132  | 2,84E+01 | 1,01E-07 | 5,64E-06 | N4bp3   | 1,32 | Yes |
| ENSMUSG00000001054 | 2,25E-01  | 7,072811784  | 1,38E+01 | 2,04E-04 | 4,43E-03 | Rmnd5b  | 1,17 | Yes |
| ENSMUSG00000001056 | 6,21E-02  | 5,760203064  | 8,54E-01 | 3,55E-01 | 6,57E-01 | Nhp2    | 1,04 | No  |
| ENSMUSG00000001062 | 2,91E-02  | 6,135937622  | 2,04E-01 | 6,52E-01 | 8,77E-01 | Vps9d1  | 1,02 | No  |
| ENSMUSG00000001065 | 5,81E-02  | 5,413575414  | 6,96E-01 | 4,04E-01 | 7,01E-01 | Zfp276  | 1,04 | No  |
| ENSMUSG00000001082 | 1,51E-01  | 5,66601768   | 4,89E+00 | 2,70E-02 | 1,84E-01 | Mfsd10  | 1,11 | No  |
| ENSMUSG00000001089 | 1,49E-01  | 6,75952532   | 5,84E+00 | 1,57E-02 | 1,30E-01 | Luzp1   | 1,11 | No  |
| ENSMUSG00000001095 | -1,21E-01 | 0,168166012  | 1,89E-01 | 6,63E-01 | 8,84E-01 | Slc13a2 | 0,92 | No  |
| ENSMUSG00000001098 | 1,03E-01  | 6,391935335  | 2,66E+00 | 1,03E-01 | 3,95E-01 | Kctd10  | 1,07 | No  |
| ENSMUSG00000001100 | 5,34E-02  | 4,831276012  | 4,91E-01 | 4,83E-01 | 7,71E-01 | Poldip2 | 1,04 | No  |
| ENSMUSG00000001103 | -2,65E+00 | -3,033633091 | 2,78E+00 | 9,55E-02 | 3,86E-01 | Sebox   | 0,16 | No  |
| ENSMUSG00000001105 | -2,70E-02 | 4,382446698  | 1,08E-01 | 7,42E-01 | 9,27E-01 | lft20   | 0,98 | No  |
| ENSMUSG00000001119 | -1,81E+00 | -0,816121349 | 1,63E+01 | 5,54E-05 | 1,48E-03 | Col6a1  | 0,29 | Yes |
| ENSMUSG00000001120 | 6,32E-01  | -0,548226242 | 2,84E+00 | 9,20E-02 | 3,82E-01 | Pcbp3   | 1,55 | No  |
| ENSMUSG00000001123 | 1,11E-02  | 6,579605607  | 3,18E-02 | 8,59E-01 | 9,94E-01 | Lgals9  | 1,01 | No  |
| ENSMUSG00000001138 | 2,41E-01  | 5,18752163   | 1,11E+01 | 8,46E-04 | 1,41E-02 | Cnm3    | 1,18 | Yes |
| ENSMUSG00000001143 | 1,37E-01  | 5,424880506  | 3,84E+00 | 5,01E-02 | 2,71E-01 | Lman2l  | 1,10 | No  |
| ENSMUSG00000001150 | 7,55E-02  | 6,159161943  | 1,37E+00 | 2,42E-01 | 5,50E-01 | Mcm3ap  | 1,05 | No  |
| ENSMUSG00000001151 | 5,75E-02  | 6,081713649  | 7,81E-01 | 3,77E-01 | 6,78E-01 | Pcnt    | 1,04 | No  |
| ENSMUSG00000001156 | -5,45E-01 | 6,042128461  | 7,01E+01 | 5,50E-17 | 9,99E-15 | Mxd1    | 0,69 | Yes |
| ENSMUSG00000001157 | 5,42E-02  | 4,833211711  | 5,11E-01 | 4,75E-01 | 7,63E-01 | Gmcl1   | 1,04 | No  |
| ENSMUSG00000001158 | -1,42E-01 | 3,871685512  | 2,40E+00 | 1,21E-01 | 4,35E-01 | Snrnp27 | 0,91 | No  |
| ENSMUSG00000001166 | 3,55E-01  | 2,216607417  | 6,38E+00 | 1,16E-02 | 1,04E-01 | Oas1c   | 1,28 | No  |
| ENSMUSG00000001168 | 1,11E+00  | -2,627669497 | 1,17E+00 | 2,79E-01 | 5,75E-01 | Oas1h   | 2,16 | No  |
| ENSMUSG00000001175 | -9,81E-02 | 9,77438571   | 3,03E+00 | 8,15E-02 | 3,66E-01 | Calm1   | 0,93 | No  |
| ENSMUSG00000001211 | 1,67E-01  | 4,99787202   | 5,05E+00 | 2,46E-02 | 1,73E-01 | Agpat3  | 1,12 | No  |
| ENSMUSG00000001227 | 3,42E-01  | 4,19599088   | 1,58E+01 | 6,89E-05 | 1,77E-03 | Sema6b  | 1,27 | Yes |
| ENSMUSG00000001228 | 2,22E-01  | 6,056801026  | 1,16E+01 | 6,65E-04 | 1,16E-02 | Uhrf1   | 1,17 | Yes |
| ENSMUSG00000001229 | 1,00E-01  | 6,543778799  | 2,56E+00 | 1,10E-01 | 4,06E-01 | Dpp9    | 1,07 | No  |
| ENSMUSG00000001240 | -1,58E-03 | 4,596728191  | 3,96E-04 | 9,84E-01 | 1,00E+00 | Ramp2   | 1,00 | No  |
| ENSMUSG00000001247 | 1,09E-01  | 4,418996283  | 1,75E+00 | 1,86E-01 | 5,50E-01 | Lsr     | 1,08 | No  |

|                    |           |              |          |          |          |         |      |     |
|--------------------|-----------|--------------|----------|----------|----------|---------|------|-----|
| ENSMUSG00000001248 | -7,50E-02 | 6,187172147  | 1,37E+00 | 2,42E-01 | 5,50E-01 | Gramd1a | 0,95 | No  |
| ENSMUSG00000001249 | 4,15E-01  | 0,97063462   | 3,79E+00 | 5,15E-02 | 2,76E-01 | Hpn     | 1,33 | No  |
| ENSMUSG00000001270 | 1,02E-01  | 6,004075554  | 2,41E+00 | 1,20E-01 | 4,32E-01 | Ckb     | 1,07 | No  |
| ENSMUSG00000001280 | -5,05E-02 | 7,173714168  | 7,06E-01 | 4,01E-01 | 6,99E-01 | Sp1     | 0,97 | No  |
| ENSMUSG00000001281 | -5,95E-02 | 6,566431962  | 9,04E-01 | 3,42E-01 | 6,42E-01 | Itgb7   | 0,96 | No  |
| ENSMUSG00000001285 | -5,28E-02 | 4,17494807   | 3,83E-01 | 5,36E-01 | 8,08E-01 | Myg1    | 0,96 | No  |
| ENSMUSG00000001288 | 8,83E-02  | 4,810195401  | 1,35E+00 | 2,46E-01 | 5,50E-01 | Rarg    | 1,06 | No  |
| ENSMUSG00000001289 | -1,86E-01 | 4,881233924  | 6,11E+00 | 1,34E-02 | 1,16E-01 | Pfdn5   | 0,88 | No  |
| ENSMUSG00000001300 | -4,32E-01 | 3,515017364  | 1,96E+01 | 9,69E-06 | 3,27E-04 | Efnb2   | 0,74 | Yes |
| ENSMUSG00000001305 | 9,40E-02  | 3,570386082  | 8,92E-01 | 3,45E-01 | 6,46E-01 | Rrp15   | 1,07 | No  |
| ENSMUSG00000001313 | 2,06E-01  | 5,317959519  | 8,32E+00 | 3,92E-03 | 4,66E-02 | Rnd2    | 1,15 | Yes |
| ENSMUSG00000001323 | 2,49E-02  | 4,346248637  | 9,08E-02 | 7,63E-01 | 9,39E-01 | Srr     | 1,02 | No  |
| ENSMUSG00000001333 | 2,68E-01  | 0,313492464  | 9,66E-01 | 3,26E-01 | 6,26E-01 | Sync    | 1,20 | No  |
| ENSMUSG00000001334 | 2,93E-01  | 4,381575345  | 1,27E+01 | 3,63E-04 | 7,06E-03 | Fndc5   | 1,23 | Yes |
| ENSMUSG00000001348 | -2,33E-01 | 6,069186477  | 1,28E+01 | 3,39E-04 | 6,68E-03 | Acp5    | 0,85 | Yes |
| ENSMUSG00000001349 | -1,33E+00 | -2,497607802 | 1,11E+00 | 2,92E-01 | 5,88E-01 | Cnn1    | 0,40 | No  |
| ENSMUSG00000001366 | 1,35E-01  | 4,602860561  | 2,91E+00 | 8,82E-02 | 3,79E-01 | Fbxo9   | 1,10 | No  |
| ENSMUSG00000001376 | 1,91E-01  | 5,527324403  | 7,73E+00 | 5,43E-03 | 5,94E-02 | Vps50   | 1,14 | No  |
| ENSMUSG00000001380 | 7,07E-02  | 5,683277283  | 1,09E+00 | 2,97E-01 | 5,93E-01 | Hars    | 1,05 | No  |
| ENSMUSG00000001383 | -1,95E-01 | 5,732128027  | 8,44E+00 | 3,66E-03 | 4,44E-02 | Zmat2   | 0,87 | Yes |
| ENSMUSG00000001403 | 1,52E-01  | 5,211993839  | 4,45E+00 | 3,49E-02 | 2,21E-01 | Ube2c   | 1,11 | No  |
| ENSMUSG00000001415 | 9,76E-02  | 6,600354663  | 2,45E+00 | 1,17E-01 | 4,24E-01 | Smg5    | 1,07 | No  |
| ENSMUSG00000001416 | -5,68E-02 | 6,785531177  | 8,54E-01 | 3,56E-01 | 6,57E-01 | Cct3    | 0,96 | No  |
| ENSMUSG00000001418 | 5,22E-02  | 7,502508559  | 7,75E-01 | 3,79E-01 | 6,79E-01 | GImp    | 1,04 | No  |
| ENSMUSG00000001419 | -2,42E-02 | 6,437253635  | 1,46E-01 | 7,02E-01 | 9,05E-01 | Mef2d   | 0,98 | No  |
| ENSMUSG00000001420 | -6,16E-02 | 1,21629521   | 1,03E-01 | 7,48E-01 | 9,30E-01 | Tmem79  | 0,96 | No  |
| ENSMUSG00000001424 | -1,93E-01 | 8,18421999   | 1,11E+01 | 8,56E-04 | 1,42E-02 | Snd1    | 0,87 | Yes |
| ENSMUSG00000001435 | 6,88E-01  | -1,448745814 | 1,71E+00 | 1,91E-01 | 5,50E-01 | Col18a1 | 1,61 | No  |
| ENSMUSG00000001436 | 3,31E-01  | 3,449972749  | 1,07E+01 | 1,09E-03 | 1,73E-02 | Slc19a1 | 1,26 | Yes |
| ENSMUSG00000001440 | 4,45E-02  | 7,770169218  | 5,78E-01 | 4,47E-01 | 7,38E-01 | Kpnb1   | 1,03 | No  |
| ENSMUSG00000001441 | -3,70E-01 | 6,727955811  | 3,60E+01 | 1,97E-09 | 1,53E-07 | Npepps  | 0,77 | Yes |
| ENSMUSG00000001444 | 5,60E-01  | -2,497697211 | 3,49E-01 | 5,55E-01 | 8,20E-01 | Tbx21   | 1,47 | No  |

|                    |           |              |           |          |          |        |      |     |
|--------------------|-----------|--------------|-----------|----------|----------|--------|------|-----|
| ENSMUSG00000001445 | -8,58E-03 | 5,24132993   | 1,44E-02  | 9,04E-01 | 1,00E+00 | Mrpl10 | 0,99 | No  |
| ENSMUSG00000001467 | 2,43E-01  | 7,002946449  | 1,60E+01  | 6,38E-05 | 1,67E-03 | Cyp51  | 1,18 | Yes |
| ENSMUSG00000001472 | 1,74E-02  | 7,945170816  | 8,88E-02  | 7,66E-01 | 9,40E-01 | Tcf25  | 1,01 | No  |
| ENSMUSG00000001473 | -1,59E-01 | 7,058216735  | 6,88E+00  | 8,72E-03 | 8,45E-02 | Tubb6  | 0,90 | No  |
| ENSMUSG00000001482 | 1,31E-01  | 5,803041883  | 3,81E+00  | 5,10E-02 | 2,75E-01 | Def8   | 1,09 | No  |
| ENSMUSG00000001493 | 4,41E-01  | -2,832010046 | 1,52E-01  | 6,97E-01 | 9,03E-01 | Meox1  | 1,36 | No  |
| ENSMUSG00000001494 | 1,85E+00  | -3,107657832 | 1,35E+00  | 2,46E-01 | 5,50E-01 | Sost   | 3,61 | No  |
| ENSMUSG00000001504 | -1,87E+00 | -3,107637761 | 1,39E+00  | 2,38E-01 | 5,50E-01 | Irx2   | 0,27 | No  |
| ENSMUSG00000001506 | -8,87E-01 | -1,051570434 | 3,63E+00  | 5,66E-02 | 2,93E-01 | Col1a1 | 0,54 | No  |
| ENSMUSG00000001507 | 6,22E-02  | 1,116137167  | 9,74E-02  | 7,55E-01 | 9,34E-01 | Itga3  | 1,04 | No  |
| ENSMUSG00000001508 | -1,40E+00 | -2,711716435 | 1,23E+00  | 2,68E-01 | 5,65E-01 | Sgca   | 0,38 | No  |
| ENSMUSG00000001510 | -1,04E-02 | -2,963271219 | -1,18E-10 | 1,00E+00 | 1,00E+00 | Dlx3   | 0,99 | No  |
| ENSMUSG00000001517 | 2,95E-01  | 5,519540707  | 1,82E+01  | 1,96E-05 | 6,09E-04 | Foxm1  | 1,23 | Yes |
| ENSMUSG00000001518 | 1,61E-01  | 2,775218612  | 1,82E+00  | 1,77E-01 | 5,37E-01 | Itfg2  | 1,12 | No  |
| ENSMUSG00000001520 | 1,54E-01  | -0,704656548 | 1,62E-01  | 6,88E-01 | 8,98E-01 | Nrip2  | 1,11 | No  |
| ENSMUSG00000001521 | 2,28E-01  | 1,232814664  | 1,44E+00  | 2,30E-01 | 5,50E-01 | Tulp3  | 1,17 | No  |
| ENSMUSG00000001524 | 5,26E-02  | 3,0426905    | 2,22E-01  | 6,38E-01 | 8,68E-01 | Gtf2h4 | 1,04 | No  |
| ENSMUSG00000001525 | 9,69E-02  | 9,92266551   | 2,96E+00  | 8,51E-02 | 3,75E-01 | Tubb5  | 1,07 | No  |
| ENSMUSG00000001542 | -1,49E-02 | 5,557918721  | 4,66E-02  | 8,29E-01 | 9,76E-01 | Ell2   | 0,99 | No  |
| ENSMUSG00000001552 | 8,47E-03  | 7,035526512  | 1,96E-02  | 8,89E-01 | 1,00E+00 | Jup    | 1,01 | No  |
| ENSMUSG00000001555 | -1,97E+00 | -2,088609552 | 6,40E+00  | 1,14E-02 | 1,03E-01 | Fkbp10 | 0,26 | No  |
| ENSMUSG00000001558 | -6,14E-01 | -2,355662258 | 5,13E-01  | 4,74E-01 | 7,62E-01 | Klhl10 | 0,65 | No  |
| ENSMUSG00000001569 | 1,35E-01  | 5,215287023  | 3,53E+00  | 6,03E-02 | 3,04E-01 | Nom1   | 1,10 | No  |
| ENSMUSG00000001576 | 2,11E-02  | 6,549203871  | 1,14E-01  | 7,35E-01 | 9,24E-01 | Ergic1 | 1,01 | No  |
| ENSMUSG00000001583 | 5,15E-02  | -0,855711034 | 1,45E-02  | 9,04E-01 | 1,00E+00 | Tnk1   | 1,04 | No  |
| ENSMUSG00000001588 | 1,73E-01  | 6,663673585  | 7,73E+00  | 5,43E-03 | 5,94E-02 | Acap1  | 1,13 | No  |
| ENSMUSG00000001604 | 1,77E-02  | 3,934652544  | 3,90E-02  | 8,43E-01 | 9,85E-01 | Tcea3  | 1,01 | No  |
| ENSMUSG00000001627 | -1,09E-02 | 6,389244236  | 2,96E-02  | 8,63E-01 | 9,97E-01 | lfrd1  | 0,99 | No  |
| ENSMUSG00000001630 | -1,87E-01 | 4,30587998   | 5,04E+00  | 2,47E-02 | 1,74E-01 | Stk38l | 0,88 | No  |
| ENSMUSG00000001632 | 1,15E-01  | 6,719974304  | 3,42E+00  | 6,46E-02 | 3,18E-01 | Brpf1  | 1,08 | No  |
| ENSMUSG00000001642 | 1,18E-01  | 4,199353266  | 1,88E+00  | 1,70E-01 | 5,26E-01 | Akr1b3 | 1,09 | No  |
| ENSMUSG00000001663 | -1,51E-01 | -0,561126783 | 1,90E-01  | 6,63E-01 | 8,83E-01 | Gstt1  | 0,90 | No  |



|                    |           |              |          |          |          |         |       |      |     |
|--------------------|-----------|--------------|----------|----------|----------|---------|-------|------|-----|
| ENSMUSG00000001665 | -2,66E-01 | 3,224715267  | 6,47E+00 | 1,10E-02 | 9,98E-02 | Gstt3   |       | 0,83 | No  |
| ENSMUSG00000001666 | -2,25E-03 | 4,014580306  | 6,49E-04 | 9,80E-01 | 1,00E+00 | Ddt     |       | 1,00 | No  |
| ENSMUSG00000001674 | -1,34E-01 | 4,168585091  | 2,48E+00 | 1,16E-01 | 4,21E-01 | Ddx18   |       | 0,91 | No  |
| ENSMUSG00000001687 | 1,87E-01  | 7,683213026  | 1,00E+01 | 1,54E-03 | 2,28E-02 | Ubl3    |       | 1,14 | Yes |
| ENSMUSG00000001700 | -3,86E-01 | 1,292227715  | 4,43E+00 | 3,54E-02 | 2,23E-01 | Gramd3  |       | 0,77 | No  |
| ENSMUSG00000001707 | 1,04E-01  | 3,920544204  | 1,32E+00 | 2,51E-01 | 5,50E-01 | Eef1e1  |       | 1,08 | No  |
| ENSMUSG00000001729 | 3,80E-02  | 8,216344771  | 4,32E-01 | 5,11E-01 | 7,94E-01 | Akt1    |       | 1,03 | No  |
| ENSMUSG00000001739 | 7,71E-02  | -1,378325692 | 2,77E-02 | 8,68E-01 | 1,00E+00 | Cldn15  |       | 1,05 | No  |
| ENSMUSG00000001741 | 3,69E-01  | 3,650912801  | 1,52E+01 | 9,53E-05 | 2,33E-03 | Il16    |       | 1,29 | Yes |
| ENSMUSG00000001750 | 8,91E-02  | 9,138870138  | 2,46E+00 | 1,17E-01 | 4,23E-01 | Tcirg1  |       | 1,06 | No  |
| ENSMUSG00000001751 | 1,40E-01  | 6,430836546  | 4,92E+00 | 2,65E-02 | 1,82E-01 | Naglu   |       | 1,10 | No  |
| ENSMUSG00000001755 | 4,54E-02  | 4,595321786  | 3,32E-01 | 5,65E-01 | 8,27E-01 | Coasy   |       | 1,03 | No  |
| ENSMUSG00000001761 | 8,06E-02  | 0,345080382  | 8,62E-02 | 7,69E-01 | 9,42E-01 | Smo     |       | 1,06 | No  |
| ENSMUSG00000001763 | -3,07E-01 | 4,757061746  | 1,65E+01 | 4,96E-05 | 1,35E-03 | Tspan33 |       | 0,81 | Yes |
| ENSMUSG00000001767 | 5,33E-02  | 4,877102051  | 5,01E-01 | 4,79E-01 | 7,66E-01 | Crnkl1  |       | 1,04 | No  |
| ENSMUSG00000001768 | 1,28E-01  | 6,460876501  | 4,11E+00 | 4,26E-02 | 2,45E-01 | Rin2    |       | 1,09 | No  |
| ENSMUSG00000001774 | -5,94E-02 | 5,491340562  | 7,46E-01 | 3,88E-01 | 6,88E-01 | Chordc1 |       | 0,96 | No  |
| ENSMUSG00000001783 | -7,45E-02 | 6,458367443  | 1,41E+00 | 2,35E-01 | 5,50E-01 | Rtcb    |       | 0,95 | No  |
| ENSMUSG00000001785 | -2,78E-03 | 4,534375112  | 1,21E-03 | 9,72E-01 | 1,00E+00 | Pwp1    |       | 1,00 | No  |
| ENSMUSG00000001786 | -1,86E-01 | 4,698978548  | 5,77E+00 | 1,63E-02 | 1,33E-01 | Fbxo7   |       | 0,88 | No  |
| ENSMUSG00000001794 | 8,23E-02  | 8,090451165  | 2,01E+00 | 1,56E-01 | 5,01E-01 | Capns1  |       | 1,06 | No  |
| ENSMUSG00000001802 | -1,06E-01 | -3,033634182 | 5,86E-03 | 9,39E-01 | 1,00E+00 | Lrp3    |       | 0,93 | No  |
| ENSMUSG00000001815 | 1,87E+00  | -3,107639691 | 1,38E+00 | 2,40E-01 | 5,50E-01 | Evx2    |       | 3,67 | No  |
| ENSMUSG00000001827 | 9,35E-01  | -1,912633335 | 2,25E+00 | 1,34E-01 | 4,60E-01 | Folr1   |       | 1,91 | No  |
| ENSMUSG00000001829 | 1,09E-01  | 3,891675131  | 1,43E+00 | 2,32E-01 | 5,50E-01 | Clpb    |       | 1,08 | No  |
| ENSMUSG00000001833 | 9,85E-02  | 7,569170319  | 2,78E+00 | 9,56E-02 | 3,86E-01 |         | 39326 | 1,07 | No  |
| ENSMUSG00000001844 | -7,10E-02 | 4,661858073  | 8,18E-01 | 3,66E-01 | 6,67E-01 | Zdhhc4  |       | 0,95 | No  |
| ENSMUSG00000001847 | 1,19E-01  | 8,73779508   | 4,37E+00 | 3,65E-02 | 2,27E-01 | Rac1    |       | 1,09 | No  |
| ENSMUSG00000001855 | 8,90E-02  | 6,39756332   | 1,99E+00 | 1,59E-01 | 5,06E-01 | Nup214  |       | 1,06 | No  |
| ENSMUSG00000001864 | -1,02E+00 | -0,668880271 | 7,73E+00 | 5,43E-03 | 5,94E-02 | Aif1l   |       | 0,49 | No  |
| ENSMUSG00000001865 | -2,62E-01 | -1,548151217 | 2,24E-01 | 6,36E-01 | 8,67E-01 | Cpa3    |       | 0,83 | No  |
| ENSMUSG00000001870 | -1,02E+00 | -1,896135461 | 2,33E+00 | 1,27E-01 | 4,47E-01 | Ltbp1   |       | 0,49 | No  |

|                    |           |              |           |          |          |          |      |     |
|--------------------|-----------|--------------|-----------|----------|----------|----------|------|-----|
| ENSMUSG00000001891 | 4,07E-02  | 6,394028342  | 4,13E-01  | 5,20E-01 | 7,99E-01 | Ugp2     | 1,03 | No  |
| ENSMUSG00000001901 | 9,01E-03  | -3,107646452 | -5,16E-10 | 1,00E+00 | 1,00E+00 | Kcqh6    | 1,01 | No  |
| ENSMUSG00000001909 | 9,55E-02  | 5,428574387  | 1,87E+00  | 1,71E-01 | 5,28E-01 | Trmt1    | 1,07 | No  |
| ENSMUSG00000001910 | 2,27E-02  | 7,207552049  | 1,43E-01  | 7,06E-01 | 9,07E-01 | Nacc1    | 1,02 | No  |
| ENSMUSG00000001911 | 2,02E-01  | 5,246368453  | 7,88E+00  | 5,00E-03 | 5,60E-02 | Nfix     | 1,15 | No  |
| ENSMUSG00000001918 | 1,44E-01  | 7,293415849  | 5,82E+00  | 1,58E-02 | 1,31E-01 | Slc1a5   | 1,11 | No  |
| ENSMUSG00000001930 | 2,89E-01  | 7,749988431  | 2,41E+01  | 9,18E-07 | 4,12E-05 | Vwf      | 1,22 | Yes |
| ENSMUSG00000001942 | 7,51E-02  | 5,478419518  | 1,17E+00  | 2,79E-01 | 5,76E-01 | Siae     | 1,05 | No  |
| ENSMUSG00000001943 | -5,69E-01 | -2,600654611 | 2,54E-01  | 6,14E-01 | 8,53E-01 | Vsig2    | 0,67 | No  |
| ENSMUSG00000001946 | -1,29E+00 | -0,412984588 | 1,46E+01  | 1,35E-04 | 3,10E-03 | Esam     | 0,41 | Yes |
| ENSMUSG00000001948 | -1,53E-01 | -0,497415348 | 2,22E-01  | 6,37E-01 | 8,68E-01 | Spa17    | 0,90 | No  |
| ENSMUSG00000001983 | 8,07E-03  | 3,083103931  | 5,51E-03  | 9,41E-01 | 1,00E+00 | Taco1    | 1,01 | No  |
| ENSMUSG00000001988 | -5,54E-01 | -0,574220852 | 2,19E+00  | 1,39E-01 | 4,70E-01 | Npas1    | 0,68 | No  |
| ENSMUSG00000001995 | 5,15E-02  | 3,817843176  | 2,99E-01  | 5,84E-01 | 8,38E-01 | Sipa1l2  | 1,04 | No  |
| ENSMUSG00000001998 | 2,54E-02  | 4,571612522  | 1,03E-01  | 7,49E-01 | 9,30E-01 | Ap4e1    | 1,02 | No  |
| ENSMUSG00000001999 | 8,49E-02  | 5,725223291  | 1,58E+00  | 2,09E-01 | 5,50E-01 | Blvra    | 1,06 | No  |
| ENSMUSG00000002017 | -2,33E-02 | 4,837889201  | 9,43E-02  | 7,59E-01 | 9,36E-01 | Fam98a   | 0,98 | No  |
| ENSMUSG00000002020 | -6,41E-01 | 1,060797366  | 1,02E+01  | 1,37E-03 | 2,08E-02 | Ltbp2    | 0,64 | Yes |
| ENSMUSG00000002028 | -1,41E-01 | 7,079384416  | 5,46E+00  | 1,94E-02 | 1,48E-01 | Kmt2a    | 0,91 | No  |
| ENSMUSG00000002031 | -1,86E-01 | 3,988384016  | 4,37E+00  | 3,67E-02 | 2,28E-01 | Ift46    | 0,88 | No  |
| ENSMUSG00000002032 | 6,19E-01  | 0,095425711  | 4,57E+00  | 3,25E-02 | 2,10E-01 | Tmem25   | 1,54 | No  |
| ENSMUSG00000002033 | -2,62E+00 | -0,912243029 | 3,75E+01  | 9,03E-10 | 7,43E-08 | Cd3g     | 0,16 | Yes |
| ENSMUSG00000002043 | -3,06E-02 | 4,362325884  | 1,39E-01  | 7,10E-01 | 9,09E-01 | Trappc6a | 0,98 | No  |
| ENSMUSG00000002052 | -5,53E-02 | 7,533797652  | 8,74E-01  | 3,50E-01 | 6,51E-01 | Supt6    | 0,96 | No  |
| ENSMUSG00000002055 | 2,64E-01  | 5,471924776  | 1,44E+01  | 1,51E-04 | 3,41E-03 | Spag5    | 1,20 | Yes |
| ENSMUSG00000002058 | 7,29E-02  | 6,013491319  | 1,24E+00  | 2,66E-01 | 5,62E-01 | Unc119   | 1,05 | No  |
| ENSMUSG00000002059 | 2,03E-01  | 1,993371923  | 1,71E+00  | 1,91E-01 | 5,50E-01 | Rab34    | 1,15 | No  |
| ENSMUSG00000002064 | -6,02E-02 | 5,726765759  | 8,01E-01  | 3,71E-01 | 6,72E-01 | Sdf2     | 0,96 | No  |
| ENSMUSG00000002068 | 8,53E-02  | 5,305051752  | 1,45E+00  | 2,28E-01 | 5,50E-01 | Ccne1    | 1,06 | No  |
| ENSMUSG00000002076 | 6,88E-01  | -2,655154313 | 2,60E-01  | 6,10E-01 | 8,51E-01 | Hsf2bp   | 1,61 | No  |
| ENSMUSG00000002083 | 1,69E-01  | 4,479845497  | 4,49E+00  | 3,41E-02 | 2,17E-01 | Bbc3     | 1,12 | No  |
| ENSMUSG00000002100 | 1,56E-01  | 3,60500065   | 2,56E+00  | 1,10E-01 | 4,06E-01 | Mybpc3   | 1,11 | No  |

|                    |           |              |          |          |          |          |      |     |
|--------------------|-----------|--------------|----------|----------|----------|----------|------|-----|
| ENSMUSG00000002102 | 6,68E-02  | 6,503136582  | 1,13E+00 | 2,87E-01 | 5,83E-01 | Psmc3    | 1,05 | No  |
| ENSMUSG00000002103 | 6,87E-03  | 6,290044508  | 1,16E-02 | 9,14E-01 | 1,00E+00 | Acp2     | 1,00 | No  |
| ENSMUSG00000002104 | 8,43E-01  | 0,801083004  | 1,30E+01 | 3,06E-04 | 6,14E-03 | Rapsn    | 1,79 | Yes |
| ENSMUSG00000002105 | 7,22E-02  | 4,927157929  | 9,28E-01 | 3,35E-01 | 6,36E-01 | Slc39a13 | 1,05 | No  |
| ENSMUSG00000002107 | 1,02E-01  | 7,283808227  | 2,92E+00 | 8,75E-02 | 3,78E-01 | Celf2    | 1,07 | No  |
| ENSMUSG00000002108 | 2,77E-01  | 2,492112783  | 4,53E+00 | 3,32E-02 | 2,14E-01 | Nr1h3    | 1,21 | No  |
| ENSMUSG00000002109 | -1,42E-02 | 3,961136041  | 2,53E-02 | 8,74E-01 | 1,00E+00 | Ddb2     | 0,99 | No  |
| ENSMUSG00000002111 | 5,65E-02  | 8,503196599  | 9,67E-01 | 3,25E-01 | 6,26E-01 | Spi1     | 1,04 | No  |
| ENSMUSG00000002129 | 7,72E-02  | 6,163720768  | 1,43E+00 | 2,31E-01 | 5,50E-01 | Sf3a1    | 1,05 | No  |
| ENSMUSG00000002147 | 1,06E-02  | 7,976978047  | 3,30E-02 | 8,56E-01 | 9,93E-01 | Stat6    | 1,01 | No  |
| ENSMUSG00000002190 | 1,87E+00  | -2,89607975  | 1,36E+00 | 2,44E-01 | 5,50E-01 | Clgn     | 3,65 | No  |
| ENSMUSG00000002204 | -1,46E-01 | 8,743103878  | 6,53E+00 | 1,06E-02 | 9,77E-02 | Napsa    | 0,90 | No  |
| ENSMUSG00000002205 | 8,27E-02  | 5,049633438  | 1,27E+00 | 2,61E-01 | 5,54E-01 | Vrk3     | 1,06 | No  |
| ENSMUSG00000002210 | 2,12E-01  | 4,808285887  | 7,68E+00 | 5,58E-03 | 6,06E-02 | Smg9     | 1,16 | No  |
| ENSMUSG00000002221 | 3,00E-02  | 5,593194648  | 1,92E-01 | 6,61E-01 | 8,82E-01 | Paxip1   | 1,02 | No  |
| ENSMUSG00000002222 | -8,49E-02 | 7,433372256  | 2,05E+00 | 1,52E-01 | 4,94E-01 | Rmnd5a   | 0,94 | No  |
| ENSMUSG00000002227 | -5,15E-01 | 4,389563893  | 4,10E+01 | 1,51E-10 | 1,39E-08 | Mov10    | 0,70 | Yes |
| ENSMUSG00000002228 | -3,75E-02 | 3,577920832  | 1,50E-01 | 6,99E-01 | 9,04E-01 | Ppm1j    | 0,97 | No  |
| ENSMUSG00000002233 | -3,05E-01 | 5,746514227  | 2,08E+01 | 5,06E-06 | 1,83E-04 | Rhoc     | 0,81 | Yes |
| ENSMUSG00000002249 | -4,83E-02 | -2,770561466 | 1,58E-03 | 9,68E-01 | 1,00E+00 | Tead3    | 0,97 | No  |
| ENSMUSG00000002250 | 5,04E-02  | 5,925243855  | 5,85E-01 | 4,44E-01 | 7,36E-01 | Ppard    | 1,04 | No  |
| ENSMUSG00000002257 | 7,62E-02  | 6,203567749  | 1,40E+00 | 2,36E-01 | 5,50E-01 | Def6     | 1,05 | No  |
| ENSMUSG00000002265 | 5,74E-01  | -2,600720996 | 3,65E-01 | 5,46E-01 | 8,14E-01 | Peg3     | 1,49 | No  |
| ENSMUSG00000002274 | 1,52E-01  | 2,489385226  | 1,32E+00 | 2,51E-01 | 5,50E-01 | Metrn    | 1,11 | No  |
| ENSMUSG00000002279 | 1,59E-01  | 4,450090414  | 3,80E+00 | 5,14E-02 | 2,76E-01 | Lmf1     | 1,12 | No  |
| ENSMUSG00000002280 | 1,72E-01  | 4,89278075   | 5,26E+00 | 2,18E-02 | 1,59E-01 | Narfl    | 1,13 | No  |
| ENSMUSG00000002289 | 4,72E-01  | 1,127723166  | 5,47E+00 | 1,94E-02 | 1,48E-01 | Angptl4  | 1,39 | No  |
| ENSMUSG00000002297 | 1,27E-01  | 5,371466656  | 3,22E+00 | 7,29E-02 | 3,43E-01 | Dbf4     | 1,09 | No  |
| ENSMUSG00000002307 | 3,26E-02  | 5,489621231  | 2,23E-01 | 6,37E-01 | 8,68E-01 | Daxx     | 1,02 | No  |
| ENSMUSG00000002308 | 4,39E-02  | 3,136952072  | 1,62E-01 | 6,87E-01 | 8,98E-01 | Cd320    | 1,03 | No  |
| ENSMUSG00000002319 | 1,03E-01  | 5,453460092  | 2,19E+00 | 1,39E-01 | 4,70E-01 | Ipo4     | 1,07 | No  |
| ENSMUSG00000002320 | 3,44E-02  | 6,167851996  | 2,84E-01 | 5,94E-01 | 8,43E-01 | Tm9sf1   | 1,02 | No  |

|                    |           |              |          |          |          |          |      |     |
|--------------------|-----------|--------------|----------|----------|----------|----------|------|-----|
| ENSMUSG00000002324 | -3,43E-01 | -0,816321919 | 7,54E-01 | 3,85E-01 | 6,86E-01 | Rec8     | 0,79 | No  |
| ENSMUSG00000002325 | -1,51E-01 | 5,770872999  | 5,14E+00 | 2,34E-02 | 1,68E-01 | Irf9     | 0,90 | No  |
| ENSMUSG00000002326 | 1,44E-01  | 5,148284065  | 3,98E+00 | 4,59E-02 | 2,56E-01 | Gmpr2    | 1,10 | No  |
| ENSMUSG00000002329 | -1,17E-01 | 4,707471363  | 2,34E+00 | 1,26E-01 | 4,45E-01 | Mdp1     | 0,92 | No  |
| ENSMUSG00000002332 | -1,46E-02 | 5,650768328  | 4,59E-02 | 8,30E-01 | 9,77E-01 | Dhrs1    | 0,99 | No  |
| ENSMUSG00000002342 | 6,98E-02  | 4,55103112   | 7,68E-01 | 3,81E-01 | 6,82E-01 | Tmem161a | 1,05 | No  |
| ENSMUSG00000002343 | 2,82E-01  | 3,298990223  | 7,57E+00 | 5,94E-03 | 6,37E-02 | Armc6    | 1,22 | No  |
| ENSMUSG00000002345 | 1,01E-02  | 3,950989305  | 1,29E-02 | 9,10E-01 | 1,00E+00 | Borcs8   | 1,01 | No  |
| ENSMUSG00000002346 | -2,24E-01 | 2,387697146  | 2,92E+00 | 8,78E-02 | 3,78E-01 | Slc25a42 | 0,86 | No  |
| ENSMUSG00000002365 | 1,13E-01  | 5,757999421  | 2,82E+00 | 9,33E-02 | 3,83E-01 | Snx9     | 1,08 | No  |
| ENSMUSG00000002372 | 5,85E-02  | 6,110271662  | 8,17E-01 | 3,66E-01 | 6,67E-01 | Ranbp3   | 1,04 | No  |
| ENSMUSG00000002379 | -1,61E-01 | 4,580463915  | 4,15E+00 | 4,16E-02 | 2,43E-01 | Ndufa11  | 0,89 | No  |
| ENSMUSG00000002384 | -2,96E-01 | 0,726908338  | 1,62E+00 | 2,03E-01 | 5,50E-01 | Bmp8b    | 0,81 | No  |
| ENSMUSG00000002393 | 5,10E-02  | 4,978302211  | 4,72E-01 | 4,92E-01 | 7,78E-01 | Nr2f6    | 1,04 | No  |
| ENSMUSG00000002395 | -2,26E-01 | 5,401742827  | 1,05E+01 | 1,21E-03 | 1,90E-02 | Use1     | 0,85 | Yes |
| ENSMUSG00000002396 | 5,51E-02  | 4,697848124  | 5,05E-01 | 4,77E-01 | 7,65E-01 | Ocel1    | 1,04 | No  |
| ENSMUSG00000002409 | 3,58E-02  | 3,918301642  | 1,56E-01 | 6,92E-01 | 9,01E-01 | Dyrk1b   | 1,03 | No  |
| ENSMUSG00000002413 | 7,14E-02  | 5,839128786  | 1,15E+00 | 2,84E-01 | 5,80E-01 | Braf     | 1,05 | No  |
| ENSMUSG00000002416 | 5,98E-02  | 3,259643115  | 3,25E-01 | 5,69E-01 | 8,30E-01 | Ndufb2   | 1,04 | No  |
| ENSMUSG00000002428 | 1,71E-02  | 5,039307847  | 5,42E-02 | 8,16E-01 | 9,69E-01 | Hltf     | 1,01 | No  |
| ENSMUSG00000002455 | -1,07E-01 | 5,964090965  | 2,69E+00 | 1,01E-01 | 3,93E-01 | Prpf6    | 0,93 | No  |
| ENSMUSG00000002458 | -4,66E-02 | 6,332696161  | 5,38E-01 | 4,63E-01 | 7,52E-01 | Rgs19    | 0,97 | No  |
| ENSMUSG00000002459 | 8,29E-01  | -2,497589439 | 5,98E-01 | 4,39E-01 | 7,32E-01 | Rgs20    | 1,78 | No  |
| ENSMUSG00000002475 | 1,16E-01  | 1,010426799  | 2,97E-01 | 5,86E-01 | 8,39E-01 | Abhd3    | 1,08 | No  |
| ENSMUSG00000002477 | 3,24E-02  | 4,043975917  | 1,37E-01 | 7,11E-01 | 9,10E-01 | Snrpd1   | 1,02 | No  |
| ENSMUSG00000002486 | 1,72E-01  | 3,299617846  | 2,69E+00 | 1,01E-01 | 3,92E-01 | Tchp     | 1,13 | No  |
| ENSMUSG00000002489 | 2,19E-01  | 7,488934869  | 1,36E+01 | 2,32E-04 | 4,91E-03 | Tiam1    | 1,16 | Yes |
| ENSMUSG00000002496 | 3,21E-02  | 6,144490189  | 2,47E-01 | 6,19E-01 | 8,56E-01 | Tsc2     | 1,02 | No  |
| ENSMUSG00000002500 | -3,92E-01 | 1,299534582  | 4,35E+00 | 3,69E-02 | 2,28E-01 | Rpl3l    | 0,76 | No  |
| ENSMUSG00000002504 | -6,95E-01 | 3,329775256  | 4,53E+01 | 1,72E-11 | 1,78E-09 | Slc9a3r2 | 0,62 | Yes |
| ENSMUSG00000002524 | 5,94E-02  | 6,433723494  | 8,88E-01 | 3,46E-01 | 6,47E-01 | Puf60    | 1,04 | No  |
| ENSMUSG00000002546 | -3,56E-02 | 6,380912817  | 3,17E-01 | 5,73E-01 | 8,33E-01 | Golga2   | 0,98 | No  |

|                    |           |              |           |          |          |         |      |     |
|--------------------|-----------|--------------|-----------|----------|----------|---------|------|-----|
| ENSMUSG00000002550 | 9,64E-02  | 4,200238686  | 1,30E+00  | 2,54E-01 | 5,50E-01 | Uck1    | 1,07 | No  |
| ENSMUSG00000002565 | -1,22E+00 | 3,841538277  | 1,73E+02  | 1,55E-39 | 1,78E-36 | Scin    | 0,43 | Yes |
| ENSMUSG00000002578 | -7,31E-01 | 5,37290837   | 1,10E+02  | 9,15E-26 | 3,38E-23 | lkzf4   | 0,60 | Yes |
| ENSMUSG00000002580 | 8,20E-03  | 4,206954514  | 9,15E-03  | 9,24E-01 | 1,00E+00 | Mien1   | 1,01 | No  |
| ENSMUSG00000002588 | 1,82E+00  | -3,033667329 | 1,31E+00  | 2,52E-01 | 5,50E-01 | Pon1    | 3,54 | No  |
| ENSMUSG00000002602 | 2,33E-01  | 10,24825526  | 1,72E+01  | 3,31E-05 | 9,53E-04 | Axl     | 1,18 | Yes |
| ENSMUSG00000002603 | 1,69E-01  | 8,50266652   | 8,61E+00  | 3,34E-03 | 4,14E-02 | Tgfb1   | 1,12 | Yes |
| ENSMUSG00000002608 | -1,45E-02 | 6,04645664   | 4,93E-02  | 8,24E-01 | 9,73E-01 | Ccdc97  | 0,99 | No  |
| ENSMUSG00000002617 | 1,62E-01  | 2,91784544   | 2,04E+00  | 1,54E-01 | 4,97E-01 | Zfp40   | 1,12 | No  |
| ENSMUSG00000002625 | -3,61E-02 | 4,839562843  | 2,26E-01  | 6,35E-01 | 8,66E-01 | Akap8l  | 0,98 | No  |
| ENSMUSG00000002635 | 2,11E-01  | 4,115432648  | 5,82E+00  | 1,59E-02 | 1,31E-01 | Pdcd2l  | 1,16 | No  |
| ENSMUSG00000002658 | -1,02E-01 | 6,166348569  | 2,52E+00  | 1,12E-01 | 4,13E-01 | Gtf2f1  | 0,93 | No  |
| ENSMUSG00000002660 | -7,32E-02 | 4,072610554  | 6,99E-01  | 4,03E-01 | 7,01E-01 | Clpp    | 0,95 | No  |
| ENSMUSG00000002661 | -1,17E-01 | 2,984434502  | 1,14E+00  | 2,86E-01 | 5,82E-01 | Alkbh7  | 0,92 | No  |
| ENSMUSG00000002664 | 2,74E-01  | -1,726285076 | 2,36E-01  | 6,27E-01 | 8,61E-01 | Pspn    | 1,21 | No  |
| ENSMUSG00000002668 | 1,44E-01  | 5,282764952  | 4,12E+00  | 4,24E-02 | 2,45E-01 | Dennd1c | 1,10 | No  |
| ENSMUSG00000002679 | 2,01E-01  | 3,813927145  | 4,54E+00  | 3,31E-02 | 2,13E-01 | Med6    | 1,15 | No  |
| ENSMUSG00000002688 | -3,83E-02 | -3,107651936 | -7,91E-11 | 1,00E+00 | 1,00E+00 | Prkd1   | 0,97 | No  |
| ENSMUSG00000002699 | 6,07E-02  | 6,470141407  | 9,30E-01  | 3,35E-01 | 6,36E-01 | Lcp2    | 1,04 | No  |
| ENSMUSG00000002718 | 8,88E-02  | 6,314706781  | 1,95E+00  | 1,63E-01 | 5,13E-01 | Cse1l   | 1,06 | No  |
| ENSMUSG00000002728 | -4,60E-03 | 5,689956122  | 4,58E-03  | 9,46E-01 | 1,00E+00 | Naa20   | 1,00 | No  |
| ENSMUSG00000002731 | -1,59E-01 | 4,396618748  | 3,72E+00  | 5,36E-02 | 2,83E-01 | Prkra   | 0,90 | No  |
| ENSMUSG00000002732 | 3,29E-01  | 1,156077234  | 2,70E+00  | 1,01E-01 | 3,92E-01 | Fkbp7   | 1,26 | No  |
| ENSMUSG00000002733 | 1,59E-01  | 4,933114642  | 4,48E+00  | 3,42E-02 | 2,18E-01 | Plekha3 | 1,12 | No  |
| ENSMUSG00000002741 | 2,27E-02  | 6,840727568  | 1,37E-01  | 7,11E-01 | 9,10E-01 | Ykt6    | 1,02 | No  |
| ENSMUSG00000002748 | 8,46E-02  | 7,446973634  | 2,04E+00  | 1,53E-01 | 4,96E-01 | Baz1b   | 1,06 | No  |
| ENSMUSG00000002763 | 6,95E-02  | 5,366032566  | 9,84E-01  | 3,21E-01 | 6,22E-01 | Pex6    | 1,05 | No  |
| ENSMUSG00000002767 | 2,58E-02  | 4,69098258   | 1,08E-01  | 7,42E-01 | 9,27E-01 | Mrpl2   | 1,02 | No  |
| ENSMUSG00000002768 | -1,82E-01 | 5,178426521  | 6,42E+00  | 1,13E-02 | 1,02E-01 | Mea1    | 0,88 | No  |
| ENSMUSG00000002769 | -2,49E-02 | 0,554301439  | 1,07E-02  | 9,18E-01 | 1,00E+00 | Gnmt    | 0,98 | No  |
| ENSMUSG00000002771 | 1,78E-01  | 0,099659166  | 4,23E-01  | 5,15E-01 | 7,97E-01 | Grin2d  | 1,13 | No  |
| ENSMUSG00000002778 | 7,73E-03  | 6,460770789  | 1,51E-02  | 9,02E-01 | 1,00E+00 | Kdelr1  | 1,01 | No  |

|                    |           |              |          |          |          |         |      |     |
|--------------------|-----------|--------------|----------|----------|----------|---------|------|-----|
| ENSMUSG00000002781 | 8,59E-02  | 3,628660942  | 8,00E-01 | 3,71E-01 | 6,72E-01 | Tmem143 | 1,06 | No  |
| ENSMUSG00000002791 | 1,82E+00  | -3,033661385 | 1,31E+00 | 2,52E-01 | 5,50E-01 | Pdxk-ps | 3,54 | No  |
| ENSMUSG00000002797 | -1,50E-01 | 3,050383936  | 1,87E+00 | 1,72E-01 | 5,29E-01 | Ggct    | 0,90 | No  |
| ENSMUSG00000002799 | 2,77E-01  | 3,73483305   | 8,04E+00 | 4,58E-03 | 5,22E-02 | Jag2    | 1,21 | No  |
| ENSMUSG00000002803 | 4,33E-02  | 3,811327621  | 2,21E-01 | 6,39E-01 | 8,69E-01 | Btbd6   | 1,03 | No  |
| ENSMUSG00000002804 | 4,55E-02  | 3,326685919  | 1,88E-01 | 6,65E-01 | 8,85E-01 | Nudt14  | 1,03 | No  |
| ENSMUSG00000002808 | -7,75E-02 | -0,683146721 | 4,47E-02 | 8,33E-01 | 9,78E-01 | Epdr1   | 0,95 | No  |
| ENSMUSG00000002812 | 1,03E-02  | 7,687002558  | 3,05E-02 | 8,61E-01 | 9,96E-01 | Flii    | 1,01 | No  |
| ENSMUSG00000002814 | 1,25E-01  | 4,421259065  | 2,33E+00 | 1,27E-01 | 4,46E-01 | Top3a   | 1,09 | No  |
| ENSMUSG00000002820 | 5,25E-02  | 4,960955069  | 4,98E-01 | 4,80E-01 | 7,68E-01 | Atg4d   | 1,04 | No  |
| ENSMUSG00000002825 | 2,29E-01  | 3,227704953  | 4,58E+00 | 3,24E-02 | 2,10E-01 | Qtrt1   | 1,17 | No  |
| ENSMUSG00000002831 | 5,95E-01  | 0,111700855  | 4,20E+00 | 4,05E-02 | 2,38E-01 | Plin4   | 1,51 | No  |
| ENSMUSG00000002833 | -8,40E-02 | 5,564507937  | 1,50E+00 | 2,20E-01 | 5,50E-01 | Hdgfl2  | 0,94 | No  |
| ENSMUSG00000002835 | 1,73E-01  | 5,363018445  | 6,09E+00 | 1,36E-02 | 1,17E-01 | Chaf1a  | 1,13 | No  |
| ENSMUSG00000002844 | -6,84E-02 | 6,605690048  | 1,21E+00 | 2,72E-01 | 5,68E-01 | Adprh   | 0,95 | No  |
| ENSMUSG00000002845 | -3,84E-01 | 5,277990198  | 2,95E+01 | 5,45E-08 | 3,22E-06 | Tmem39a | 0,77 | Yes |
| ENSMUSG00000002846 | 2,98E-02  | 3,592566255  | 9,58E-02 | 7,57E-01 | 9,35E-01 | Timmdc1 | 1,02 | No  |
| ENSMUSG00000002847 | -8,67E-01 | 3,112581015  | 6,35E+01 | 1,59E-15 | 2,55E-13 | Pla1a   | 0,55 | Yes |
| ENSMUSG00000002870 | 1,28E-01  | 6,167239382  | 3,91E+00 | 4,80E-02 | 2,63E-01 | Mcm2    | 1,09 | No  |
| ENSMUSG00000002871 | -5,26E-02 | 5,544940129  | 5,89E-01 | 4,43E-01 | 7,34E-01 | Tpra1   | 0,96 | No  |
| ENSMUSG00000002881 | -7,96E-02 | 6,020873516  | 1,49E+00 | 2,23E-01 | 5,50E-01 | Nab1    | 0,95 | No  |
| ENSMUSG00000002885 | -2,66E-01 | 6,435026095  | 1,77E+01 | 2,65E-05 | 7,90E-04 | Adgre5  | 0,83 | Yes |
| ENSMUSG00000002897 | 3,79E-01  | 6,469131894  | 3,58E+01 | 2,16E-09 | 1,67E-07 | Il17ra  | 1,30 | Yes |
| ENSMUSG00000002900 | -6,94E-01 | -2,033628724 | 8,20E-01 | 3,65E-01 | 6,66E-01 | Lamb1   | 0,62 | No  |
| ENSMUSG00000002908 | 4,05E-01  | -2,574236739 | 1,95E-01 | 6,59E-01 | 8,81E-01 | Kcnn1   | 1,32 | No  |
| ENSMUSG00000002910 | 3,37E-01  | 3,458618788  | 1,15E+01 | 7,12E-04 | 1,22E-02 | Arrdc2  | 1,26 | Yes |
| ENSMUSG00000002944 | 2,18E-01  | 8,864850929  | 1,46E+01 | 1,36E-04 | 3,12E-03 | Cd36    | 1,16 | Yes |
| ENSMUSG00000002948 | 2,72E-02  | 5,664597006  | 1,62E-01 | 6,88E-01 | 8,98E-01 | Map2k7  | 1,02 | No  |
| ENSMUSG00000002949 | 3,62E-02  | 5,188608278  | 2,53E-01 | 6,15E-01 | 8,54E-01 | Timm44  | 1,03 | No  |
| ENSMUSG00000002957 | 1,83E-01  | 7,045899231  | 9,14E+00 | 2,50E-03 | 3,33E-02 | Ap2a2   | 1,14 | Yes |
| ENSMUSG00000002963 | 1,64E-03  | 5,0225665    | 4,92E-04 | 9,82E-01 | 1,00E+00 | Pnkp    | 1,00 | No  |
| ENSMUSG00000002968 | -3,51E-02 | 5,896244592  | 2,82E-01 | 5,95E-01 | 8,44E-01 | Med25   | 0,98 | No  |

|                    |           |              |          |          |          |          |      |     |
|--------------------|-----------|--------------|----------|----------|----------|----------|------|-----|
| ENSMUSG00000002980 | 5,81E-02  | 2,930334223  | 2,50E-01 | 6,17E-01 | 8,55E-01 | Bcam     | 1,04 | No  |
| ENSMUSG00000002981 | -1,69E-02 | 6,94591729   | 7,71E-02 | 7,81E-01 | 9,49E-01 | Clptm1   | 0,99 | No  |
| ENSMUSG00000002983 | -7,01E-01 | 6,801135308  | 1,30E+02 | 3,45E-30 | 1,95E-27 | Relb     | 0,62 | Yes |
| ENSMUSG00000002984 | 1,15E-01  | 5,267359169  | 2,59E+00 | 1,07E-01 | 4,01E-01 | Tomm40   | 1,08 | No  |
| ENSMUSG00000002985 | -3,81E-01 | 4,083136942  | 1,93E+01 | 1,14E-05 | 3,77E-04 | Apoe     | 0,77 | Yes |
| ENSMUSG00000002992 | -5,90E-01 | 0,750263578  | 7,02E+00 | 8,07E-03 | 7,95E-02 | Apoc2    | 0,66 | No  |
| ENSMUSG00000002996 | 2,30E-03  | 6,176721784  | 1,28E-03 | 9,71E-01 | 1,00E+00 | Hbp1     | 1,00 | No  |
| ENSMUSG00000002997 | -1,29E-02 | 4,931571887  | 3,02E-02 | 8,62E-01 | 9,97E-01 | Prkar2b  | 0,99 | No  |
| ENSMUSG00000003031 | -1,90E-02 | 5,634955427  | 7,92E-02 | 7,78E-01 | 9,47E-01 | Cdkn1b   | 0,99 | No  |
| ENSMUSG00000003032 | 2,98E-01  | 7,097355972  | 2,41E+01 | 9,15E-07 | 4,12E-05 | Klf4     | 1,23 | Yes |
| ENSMUSG00000003033 | 7,52E-02  | 6,385223196  | 1,41E+00 | 2,34E-01 | 5,50E-01 | Ap1m1    | 1,05 | No  |
| ENSMUSG00000003037 | -5,60E-02 | 6,796874653  | 8,35E-01 | 3,61E-01 | 6,62E-01 | Rab8a    | 0,96 | No  |
| ENSMUSG00000003038 | 9,09E-02  | 6,884443303  | 2,20E+00 | 1,38E-01 | 4,68E-01 | Hmgn2    | 1,07 | No  |
| ENSMUSG00000003039 | -2,39E-01 | 6,749422997  | 1,52E+01 | 9,85E-05 | 2,39E-03 | Fam32a   | 0,85 | Yes |
| ENSMUSG00000003051 | -8,24E-01 | -2,711692991 | 3,73E-01 | 5,41E-01 | 8,11E-01 | Elf3     | 0,57 | No  |
| ENSMUSG00000003053 | 1,81E+00  | -3,10765737  | 1,28E+00 | 2,58E-01 | 5,50E-01 | Cyp2c29  | 3,49 | No  |
| ENSMUSG00000003062 | 3,25E-02  | 5,160381283  | 2,04E-01 | 6,51E-01 | 8,77E-01 | Stard3nl | 1,02 | No  |
| ENSMUSG00000003068 | 7,08E-02  | 6,813002377  | 1,33E+00 | 2,49E-01 | 5,50E-01 | Stk11    | 1,05 | No  |
| ENSMUSG00000003070 | -9,89E-01 | 1,817606662  | 4,14E+01 | 1,26E-10 | 1,17E-08 | Efna2    | 0,50 | Yes |
| ENSMUSG00000003072 | 2,47E-02  | 7,317609703  | 1,71E-01 | 6,79E-01 | 8,93E-01 | Atp5d    | 1,02 | No  |
| ENSMUSG00000003099 | 4,26E-02  | 5,716298354  | 3,99E-01 | 5,28E-01 | 8,04E-01 | Ppp5c    | 1,03 | No  |
| ENSMUSG00000003119 | -1,13E-01 | 6,026880085  | 3,02E+00 | 8,23E-02 | 3,69E-01 | Cdk12    | 0,92 | No  |
| ENSMUSG00000003123 | 1,23E-02  | 6,188014366  | 3,71E-02 | 8,47E-01 | 9,87E-01 | Lipe     | 1,01 | No  |
| ENSMUSG00000003131 | 3,50E-02  | 7,002093211  | 3,32E-01 | 5,64E-01 | 8,27E-01 | Pafah1b2 | 1,02 | No  |
| ENSMUSG00000003134 | -4,70E-01 | 7,078849933  | 6,06E+01 | 6,87E-15 | 1,06E-12 | Tbc1d8   | 0,72 | Yes |
| ENSMUSG00000003135 | 1,57E-02  | 5,091415573  | 4,59E-02 | 8,30E-01 | 9,77E-01 | Cnot11   | 1,01 | No  |
| ENSMUSG00000003153 | 3,56E-01  | 3,242662566  | 1,12E+01 | 8,07E-04 | 1,36E-02 | Slc2a3   | 1,28 | Yes |
| ENSMUSG00000003154 | -2,31E-02 | 6,091865928  | 1,27E-01 | 7,22E-01 | 9,16E-01 | Foxj2    | 0,98 | No  |
| ENSMUSG00000003161 | -2,52E-01 | 7,052883148  | 1,74E+01 | 3,07E-05 | 8,93E-04 | Sri      | 0,84 | Yes |
| ENSMUSG00000003166 | 9,47E-02  | 5,747403591  | 1,99E+00 | 1,58E-01 | 5,04E-01 | Dgcr2    | 1,07 | No  |
| ENSMUSG00000003184 | -1,48E-02 | 5,574766533  | 4,70E-02 | 8,28E-01 | 9,76E-01 | Irf3     | 0,99 | No  |
| ENSMUSG00000003190 | 8,99E-02  | 3,187499842  | 7,12E-01 | 3,99E-01 | 6,98E-01 | Bcl2l12  | 1,06 | No  |

|                    |           |              |          |          |          |         |      |     |
|--------------------|-----------|--------------|----------|----------|----------|---------|------|-----|
| ENSMUSG00000003198 | 4,79E-02  | 2,567425411  | 1,42E-01 | 7,06E-01 | 9,08E-01 | Zfp959  | 1,03 | No  |
| ENSMUSG00000003199 | -7,78E-02 | 5,484094291  | 1,27E+00 | 2,60E-01 | 5,54E-01 | Mpnd    | 0,95 | No  |
| ENSMUSG00000003200 | 9,62E-02  | 5,835473099  | 2,09E+00 | 1,49E-01 | 4,89E-01 | Sh3gl1  | 1,07 | No  |
| ENSMUSG00000003206 | 2,02E-02  | 4,956779288  | 7,32E-02 | 7,87E-01 | 9,53E-01 | Ebi3    | 1,01 | No  |
| ENSMUSG00000003208 | 7,02E-02  | 2,653161656  | 3,24E-01 | 5,69E-01 | 8,30E-01 | Ccdc94  | 1,05 | No  |
| ENSMUSG00000003226 | 6,75E-02  | 8,064330069  | 1,35E+00 | 2,46E-01 | 5,50E-01 | Ranbp2  | 1,05 | No  |
| ENSMUSG00000003227 | 1,81E+00  | -3,10765737  | 1,28E+00 | 2,58E-01 | 5,50E-01 | Edar    | 3,49 | No  |
| ENSMUSG00000003228 | 1,04E-01  | 4,848691506  | 1,85E+00 | 1,74E-01 | 5,32E-01 | Grk5    | 1,07 | No  |
| ENSMUSG00000003233 | 2,78E-02  | 4,705919085  | 1,30E-01 | 7,18E-01 | 9,15E-01 | Dvl3    | 1,02 | No  |
| ENSMUSG00000003234 | 1,99E-02  | 4,792072044  | 6,82E-02 | 7,94E-01 | 9,56E-01 | Abcf3   | 1,01 | No  |
| ENSMUSG00000003235 | -2,63E-03 | 5,52646154   | 1,46E-03 | 9,70E-01 | 1,00E+00 | Eif2b5  | 1,00 | No  |
| ENSMUSG00000003269 | -1,28E-01 | 5,085301129  | 3,05E+00 | 8,08E-02 | 3,64E-01 | Cyth2   | 0,92 | No  |
| ENSMUSG00000003271 | 1,99E-01  | -0,84769837  | 2,32E-01 | 6,30E-01 | 8,62E-01 | Sult2b1 | 1,15 | No  |
| ENSMUSG00000003273 | -6,16E-01 | -2,311133661 | 5,17E-01 | 4,72E-01 | 7,60E-01 | Car11   | 0,65 | No  |
| ENSMUSG00000003279 | -2,46E-01 | -1,997965238 | 1,19E-01 | 7,30E-01 | 9,21E-01 | Dlgap1  | 0,84 | No  |
| ENSMUSG00000003282 | -7,76E-02 | 2,492222944  | 3,74E-01 | 5,41E-01 | 8,11E-01 | Plag1   | 0,95 | No  |
| ENSMUSG00000003283 | -1,62E-01 | 6,313551992  | 6,56E+00 | 1,05E-02 | 9,65E-02 | Hck     | 0,89 | No  |
| ENSMUSG00000003299 | 1,58E-01  | 5,269633673  | 4,90E+00 | 2,68E-02 | 1,84E-01 | Mrpl4   | 1,12 | No  |
| ENSMUSG00000003308 | 6,08E-02  | 5,840420996  | 8,38E-01 | 3,60E-01 | 6,61E-01 | Keap1   | 1,04 | No  |
| ENSMUSG00000003309 | -8,90E-02 | -2,146144347 | 1,28E-02 | 9,10E-01 | 1,00E+00 | Ap1m2   | 0,94 | No  |
| ENSMUSG00000003316 | 3,49E-02  | 7,555350942  | 3,48E-01 | 5,55E-01 | 8,20E-01 | Glg1    | 1,02 | No  |
| ENSMUSG00000003341 | -1,71E+00 | -2,497580728 | 3,23E+00 | 7,24E-02 | 3,41E-01 | Atp8b3  | 0,31 | No  |
| ENSMUSG00000003344 | 5,79E-02  | 5,184060197  | 6,48E-01 | 4,21E-01 | 7,16E-01 | Btbd2   | 1,04 | No  |
| ENSMUSG00000003345 | 5,36E-02  | 6,76841323   | 7,55E-01 | 3,85E-01 | 6,86E-01 | Csnk1g2 | 1,04 | No  |
| ENSMUSG00000003346 | 2,48E-01  | 6,229521873  | 1,49E+01 | 1,16E-04 | 2,75E-03 | Abhd17a | 1,19 | Yes |
| ENSMUSG00000003348 | -2,51E-01 | 7,368968618  | 1,79E+01 | 2,39E-05 | 7,24E-04 | Mob3a   | 0,84 | Yes |
| ENSMUSG00000003352 | -8,99E-01 | 8,396642398  | 2,41E+02 | 3,01E-54 | 1,00E-50 | Cacnb3  | 0,54 | Yes |
| ENSMUSG00000003354 | 7,63E-02  | -0,614223057 | 4,13E-02 | 8,39E-01 | 9,83E-01 | Ccdc65  | 1,05 | No  |
| ENSMUSG00000003355 | 1,22E-01  | 2,514066109  | 8,77E-01 | 3,49E-01 | 6,50E-01 | Fkbp11  | 1,09 | No  |
| ENSMUSG00000003360 | 1,04E-01  | 6,471002204  | 2,72E+00 | 9,91E-02 | 3,92E-01 | Ddx23   | 1,07 | No  |
| ENSMUSG00000003363 | 1,00E-01  | 8,659543751  | 3,05E+00 | 8,09E-02 | 3,65E-01 | Pld3    | 1,07 | No  |
| ENSMUSG00000003378 | -6,11E-01 | 1,100150272  | 9,89E+00 | 1,66E-03 | 2,42E-02 | Grik5   | 0,65 | Yes |



|                    |           |              |           |          |          |         |      |     |
|--------------------|-----------|--------------|-----------|----------|----------|---------|------|-----|
| ENSMUSG00000003379 | -8,36E-01 | -1,587318129 | 2,33E+00  | 1,27E-01 | 4,47E-01 | Cd79a   | 0,56 | No  |
| ENSMUSG00000003380 | 2,04E-02  | 5,783636616  | 9,28E-02  | 7,61E-01 | 9,37E-01 | Rabac1  | 1,01 | No  |
| ENSMUSG00000003382 | -4,54E-01 | 9,159086145  | 6,37E+01  | 1,45E-15 | 2,35E-13 | Etv3    | 0,73 | Yes |
| ENSMUSG00000003402 | -1,73E-02 | 6,242718153  | 7,25E-02  | 7,88E-01 | 9,53E-01 | Prkcsh  | 0,99 | No  |
| ENSMUSG00000003410 | -3,83E-02 | -3,107651936 | -7,91E-11 | 1,00E+00 | 1,00E+00 | Elavl3  | 0,97 | No  |
| ENSMUSG00000003411 | -1,72E+00 | -2,770622427 | 2,06E+00  | 1,51E-01 | 4,93E-01 | Rab3b   | 0,30 | No  |
| ENSMUSG00000003418 | -7,98E-01 | 1,004090508  | 1,60E+01  | 6,26E-05 | 1,64E-03 | St8sia6 | 0,57 | Yes |
| ENSMUSG00000003420 | 3,70E-01  | 6,549370213  | 3,47E+01  | 3,83E-09 | 2,83E-07 | Fcgrt   | 1,29 | Yes |
| ENSMUSG00000003421 | 1,85E-01  | 5,076378985  | 6,33E+00  | 1,19E-02 | 1,06E-01 | Nosip   | 1,14 | No  |
| ENSMUSG00000003423 | 2,09E-02  | 4,363034083  | 6,38E-02  | 8,01E-01 | 9,61E-01 | Pih1d1  | 1,01 | No  |
| ENSMUSG00000003429 | -2,63E-01 | 6,549707942  | 1,78E+01  | 2,50E-05 | 7,53E-04 | Rps11   | 0,83 | Yes |
| ENSMUSG00000003435 | -7,98E-02 | 6,910379489  | 1,71E+00  | 1,91E-01 | 5,50E-01 | Supt5   | 0,95 | No  |
| ENSMUSG00000003436 | -3,19E+00 | -2,896141896 | 4,27E+00  | 3,87E-02 | 2,33E-01 | Dll3    | 0,11 | No  |
| ENSMUSG00000003437 | -4,18E-02 | 5,716364957  | 3,87E-01  | 5,34E-01 | 8,07E-01 | Paf1    | 0,97 | No  |
| ENSMUSG00000003438 | 1,03E-01  | 5,007443805  | 1,94E+00  | 1,64E-01 | 5,15E-01 | Timm50  | 1,07 | No  |
| ENSMUSG00000003444 | -1,44E-01 | 2,93829469   | 1,55E+00  | 2,13E-01 | 5,50E-01 | Med29   | 0,91 | No  |
| ENSMUSG00000003452 | -4,62E-01 | 1,379402468  | 6,38E+00  | 1,16E-02 | 1,04E-01 | Bicd1   | 0,73 | No  |
| ENSMUSG00000003458 | 1,05E-01  | 7,031016671  | 2,99E+00  | 8,40E-02 | 3,71E-01 | Ncstn   | 1,08 | No  |
| ENSMUSG00000003464 | 1,86E-02  | 6,536068619  | 8,86E-02  | 7,66E-01 | 9,40E-01 | Pex19   | 1,01 | No  |
| ENSMUSG00000003469 | -5,88E-02 | -3,033616507 | 1,62E-03  | 9,68E-01 | 1,00E+00 | Phyhip  | 0,96 | No  |
| ENSMUSG00000003476 | -6,31E-02 | -2,963274299 | 1,81E-03  | 9,66E-01 | 1,00E+00 | Crhr2   | 0,96 | No  |
| ENSMUSG00000003484 | 1,88E-01  | 4,713732313  | 5,83E+00  | 1,58E-02 | 1,30E-01 | Cyp4f18 | 1,14 | No  |
| ENSMUSG00000003500 | 2,41E-01  | 3,754938347  | 6,46E+00  | 1,10E-02 | 1,00E-01 | Impdh1  | 1,18 | No  |
| ENSMUSG00000003518 | 1,28E-01  | 6,816216148  | 4,34E+00  | 3,72E-02 | 2,29E-01 | Dusp3   | 1,09 | No  |
| ENSMUSG00000003526 | -8,57E-02 | 2,65235784   | 4,85E-01  | 4,86E-01 | 7,73E-01 | Prodh   | 0,94 | No  |
| ENSMUSG00000003527 | -7,29E-02 | 4,238180226  | 7,46E-01  | 3,88E-01 | 6,88E-01 | Dgcr14  | 0,95 | No  |
| ENSMUSG00000003528 | 9,25E-02  | 5,904553513  | 1,95E+00  | 1,62E-01 | 5,12E-01 | Slc25a1 | 1,07 | No  |
| ENSMUSG00000003531 | 1,67E-02  | 3,334091548  | 2,60E-02  | 8,72E-01 | 1,00E+00 | Dgcr6   | 1,01 | No  |
| ENSMUSG00000003534 | -4,41E-02 | 2,471903524  | 1,22E-01  | 7,27E-01 | 9,19E-01 | Ddr1    | 0,97 | No  |
| ENSMUSG00000003541 | 2,75E-01  | 6,787373028  | 1,99E+01  | 8,07E-06 | 2,77E-04 | Ier3    | 1,21 | Yes |
| ENSMUSG00000003545 | 9,62E-01  | 6,455282222  | 2,21E+02  | 6,03E-50 | 1,29E-46 | Fosb    | 1,95 | Yes |
| ENSMUSG00000003546 | 1,43E-01  | 5,588691661  | 4,36E+00  | 3,67E-02 | 2,28E-01 | Klc4    | 1,10 | No  |

|                    |           |              |          |          |          |          |      |     |
|--------------------|-----------|--------------|----------|----------|----------|----------|------|-----|
| ENSMUSG00000003549 | -6,90E-02 | 3,288547915  | 4,40E-01 | 5,07E-01 | 7,91E-01 | Ercc1    | 0,95 | No  |
| ENSMUSG00000003555 | 8,13E-01  | -2,711753932 | 5,75E-01 | 4,48E-01 | 7,39E-01 | Cyp17a1  | 1,76 | No  |
| ENSMUSG00000003559 | -1,70E-01 | 2,624888393  | 1,89E+00 | 1,69E-01 | 5,23E-01 | As3mt    | 0,89 | No  |
| ENSMUSG00000003573 | 1,09E-01  | 5,295923956  | 2,34E+00 | 1,26E-01 | 4,45E-01 | Homer3   | 1,08 | No  |
| ENSMUSG00000003575 | 3,06E-02  | 4,307129251  | 1,34E-01 | 7,15E-01 | 9,12E-01 | Crtc1    | 1,02 | No  |
| ENSMUSG00000003581 | 1,62E-01  | 4,388146511  | 3,87E+00 | 4,90E-02 | 2,67E-01 | Rnf215   | 1,12 | No  |
| ENSMUSG00000003585 | -1,04E-01 | 0,678103326  | 2,01E-01 | 6,54E-01 | 8,79E-01 | Sec14l2  | 0,93 | No  |
| ENSMUSG00000003604 | -3,76E-02 | 3,82375497   | 1,68E-01 | 6,82E-01 | 8,94E-01 | Aven     | 0,97 | No  |
| ENSMUSG00000003617 | -7,74E-02 | 1,477117051  | 2,01E-01 | 6,54E-01 | 8,79E-01 | Cp       | 0,95 | No  |
| ENSMUSG00000003623 | 1,19E-01  | 4,797410561  | 2,44E+00 | 1,18E-01 | 4,28E-01 | Crot     | 1,09 | No  |
| ENSMUSG00000003644 | 2,01E-01  | 7,057111518  | 1,10E+01 | 9,20E-04 | 1,51E-02 | Rps6ka1  | 1,15 | Yes |
| ENSMUSG00000003660 | 4,05E-02  | 7,662890464  | 4,75E-01 | 4,91E-01 | 7,77E-01 | Snrnp200 | 1,03 | No  |
| ENSMUSG00000003662 | -3,96E-02 | 4,982601142  | 2,85E-01 | 5,93E-01 | 8,43E-01 | Ciao1    | 0,97 | No  |
| ENSMUSG00000003665 | -5,66E-01 | -2,448600914 | 2,51E-01 | 6,16E-01 | 8,55E-01 | Has1     | 0,68 | No  |
| ENSMUSG00000003680 | 1,03E-01  | 5,459750807  | 2,20E+00 | 1,38E-01 | 4,68E-01 | Taf6l    | 1,07 | No  |
| ENSMUSG00000003721 | 5,15E-02  | 4,414392093  | 3,98E-01 | 5,28E-01 | 8,04E-01 | Insig2   | 1,04 | No  |
| ENSMUSG00000003731 | 1,20E-01  | 6,690897881  | 3,78E+00 | 5,18E-02 | 2,77E-01 | Kpna6    | 1,09 | No  |
| ENSMUSG00000003746 | -1,96E-01 | 6,37868608   | 9,62E+00 | 1,93E-03 | 2,72E-02 | Man1a    | 0,87 | Yes |
| ENSMUSG00000003752 | -1,13E-01 | 2,887795544  | 9,69E-01 | 3,25E-01 | 6,26E-01 | Itpkc    | 0,92 | No  |
| ENSMUSG00000003762 | 2,49E-01  | 3,714131398  | 6,89E+00 | 8,64E-03 | 8,38E-02 | Coq8b    | 1,19 | No  |
| ENSMUSG00000003778 | 7,57E-02  | 6,024702859  | 1,34E+00 | 2,46E-01 | 5,50E-01 | Brd8     | 1,05 | No  |
| ENSMUSG00000003779 | 2,02E-01  | 5,92860839   | 9,40E+00 | 2,17E-03 | 2,99E-02 | Kif20a   | 1,15 | Yes |
| ENSMUSG00000003808 | -1,07E-02 | 5,591914835  | 2,42E-02 | 8,76E-01 | 1,00E+00 | Farsa    | 0,99 | No  |
| ENSMUSG00000003809 | 7,51E-02  | 4,052266409  | 7,42E-01 | 3,89E-01 | 6,89E-01 | Gcdh     | 1,05 | No  |
| ENSMUSG00000003810 | 1,64E-01  | 6,229061554  | 6,46E+00 | 1,10E-02 | 1,00E-01 | Mast2    | 1,12 | No  |
| ENSMUSG00000003812 | 1,12E-01  | 6,906230956  | 3,37E+00 | 6,65E-02 | 3,24E-01 | Dnase2a  | 1,08 | No  |
| ENSMUSG00000003813 | -1,02E-01 | 5,761575127  | 2,30E+00 | 1,29E-01 | 4,52E-01 | Rad23a   | 0,93 | No  |
| ENSMUSG00000003814 | 8,99E-02  | 9,859888202  | 2,55E+00 | 1,11E-01 | 4,08E-01 | Calr     | 1,06 | No  |
| ENSMUSG00000003824 | 2,64E-02  | 3,421664446  | 6,78E-02 | 7,95E-01 | 9,56E-01 | Syce2    | 1,02 | No  |
| ENSMUSG00000003847 | -4,27E-01 | 7,969801043  | 5,36E+01 | 2,45E-13 | 3,24E-11 | Nfat5    | 0,74 | Yes |
| ENSMUSG00000003848 | -2,80E-02 | 4,597681297  | 1,25E-01 | 7,24E-01 | 9,18E-01 | Nob1     | 0,98 | No  |
| ENSMUSG00000003849 | -3,07E-01 | 4,380705387  | 1,39E+01 | 1,92E-04 | 4,21E-03 | Nqo1     | 0,81 | Yes |

|                    |           |              |          |          |          |         |      |     |
|--------------------|-----------|--------------|----------|----------|----------|---------|------|-----|
| ENSMUSG00000003863 | 7,40E-01  | 0,014984552  | 6,16E+00 | 1,30E-02 | 1,13E-01 | Ppfi3   | 1,67 | No  |
| ENSMUSG00000003865 | 2,41E-01  | 5,69885663   | 1,27E+01 | 3,63E-04 | 7,07E-03 | Gys1    | 1,18 | Yes |
| ENSMUSG00000003868 | 2,04E-01  | 4,734342437  | 6,85E+00 | 8,88E-03 | 8,56E-02 | Ruvbl2  | 1,15 | No  |
| ENSMUSG00000003872 | 6,18E-01  | -0,863893494 | 2,08E+00 | 1,49E-01 | 4,90E-01 | Lin7b   | 1,53 | No  |
| ENSMUSG00000003873 | -3,80E-02 | 6,703790183  | 3,76E-01 | 5,39E-01 | 8,10E-01 | Bax     | 0,97 | No  |
| ENSMUSG00000003882 | -6,29E-02 | 7,420112895  | 1,12E+00 | 2,90E-01 | 5,86E-01 | Il7r    | 0,96 | No  |
| ENSMUSG00000003923 | 1,23E-02  | 4,526388048  | 2,33E-02 | 8,79E-01 | 1,00E+00 | Tfam    | 1,01 | No  |
| ENSMUSG00000003929 | 2,79E-01  | 2,853558077  | 5,83E+00 | 1,57E-02 | 1,30E-01 | Zfp81   | 1,21 | No  |
| ENSMUSG00000003934 | 5,50E-02  | -1,929316806 | 7,34E-03 | 9,32E-01 | 1,00E+00 | Efnb3   | 1,04 | No  |
| ENSMUSG00000003948 | -2,65E-01 | 4,913205543  | 1,26E+01 | 3,85E-04 | 7,41E-03 | Mmd     | 0,83 | Yes |
| ENSMUSG00000003949 | -5,65E-01 | -2,600623117 | 2,50E-01 | 6,17E-01 | 8,55E-01 | Hlf     | 0,68 | No  |
| ENSMUSG00000003955 | 1,08E-01  | 4,720434289  | 1,91E+00 | 1,67E-01 | 5,20E-01 | Fam162a | 1,08 | No  |
| ENSMUSG00000003970 | -4,59E-02 | 9,233901201  | 6,56E-01 | 4,18E-01 | 7,13E-01 | Rpl8    | 0,97 | No  |
| ENSMUSG00000003974 | 1,81E+00  | -3,10765737  | 1,28E+00 | 2,58E-01 | 5,50E-01 | Grm3    | 3,49 | No  |
| ENSMUSG00000003992 | -2,07E-01 | 1,59447747   | 1,50E+00 | 2,21E-01 | 5,50E-01 | Ssbp2   | 0,87 | No  |
| ENSMUSG00000004018 | -1,71E-02 | 3,011041073  | 2,38E-02 | 8,77E-01 | 1,00E+00 | Fancl   | 0,99 | No  |
| ENSMUSG00000004032 | -7,10E-03 | -0,407368661 | 4,97E-04 | 9,82E-01 | 1,00E+00 | Gstm5   | 1,00 | No  |
| ENSMUSG00000004035 | 6,18E-01  | -2,268078597 | 4,25E-01 | 5,14E-01 | 7,96E-01 | Gstm7   | 1,53 | No  |
| ENSMUSG00000004038 | 1,83E+00  | -2,963282593 | 1,33E+00 | 2,50E-01 | 5,50E-01 | Gstm3   | 3,56 | No  |
| ENSMUSG00000004040 | -2,10E-01 | 7,639668655  | 1,27E+01 | 3,72E-04 | 7,19E-03 | Stat3   | 0,86 | Yes |
| ENSMUSG00000004043 | -1,80E-01 | 6,790007436  | 8,68E+00 | 3,22E-03 | 4,04E-02 | Stat5a  | 0,88 | Yes |
| ENSMUSG00000004044 | -1,77E-01 | 3,104616988  | 2,56E+00 | 1,09E-01 | 4,06E-01 | Cavin1  | 0,88 | No  |
| ENSMUSG00000004054 | 9,48E-02  | 6,787916292  | 2,38E+00 | 1,23E-01 | 4,38E-01 | Map3k11 | 1,07 | No  |
| ENSMUSG00000004056 | -6,67E-02 | 6,008267695  | 1,04E+00 | 3,09E-01 | 6,07E-01 | Akt2    | 0,95 | No  |
| ENSMUSG00000004069 | 8,28E-02  | 4,982905736  | 1,25E+00 | 2,63E-01 | 5,58E-01 | Dnaja3  | 1,06 | No  |
| ENSMUSG00000004070 | -8,71E-02 | 5,941793202  | 1,76E+00 | 1,85E-01 | 5,49E-01 | Hmox2   | 0,94 | No  |
| ENSMUSG00000004071 | 1,07E-02  | 5,640376224  | 2,51E-02 | 8,74E-01 | 1,00E+00 | Cdip1   | 1,01 | No  |
| ENSMUSG00000004085 | 1,17E-01  | 4,992919056  | 2,49E+00 | 1,15E-01 | 4,18E-01 | Map3k20 | 1,08 | No  |
| ENSMUSG00000004096 | -1,14E-01 | 5,787903564  | 2,88E+00 | 8,96E-02 | 3,80E-01 | Cwc15   | 0,92 | No  |
| ENSMUSG00000004098 | -2,04E+00 | -1,86348382  | 9,12E+00 | 2,53E-03 | 3,36E-02 | Col5a3  | 0,24 | Yes |
| ENSMUSG00000004099 | 1,94E-01  | 7,306329558  | 1,05E+01 | 1,18E-03 | 1,86E-02 | Dnmt1   | 1,14 | Yes |
| ENSMUSG00000004100 | 1,17E-01  | 4,689875799  | 2,22E+00 | 1,36E-01 | 4,65E-01 | Ppan    | 1,08 | No  |

|                    |           |              |          |          |          |         |      |     |
|--------------------|-----------|--------------|----------|----------|----------|---------|------|-----|
| ENSMUSG00000004105 | 2,63E-01  | 5,922565907  | 1,55E+01 | 8,14E-05 | 2,04E-03 | Angptl2 | 1,20 | Yes |
| ENSMUSG00000004110 | -4,98E-01 | -1,424770807 | 6,01E-01 | 4,38E-01 | 7,31E-01 | Cacna1e | 0,71 | No  |
| ENSMUSG00000004113 | 3,93E-01  | 3,221714363  | 1,34E+01 | 2,55E-04 | 5,32E-03 | Cacna1b | 1,31 | Yes |
| ENSMUSG00000004127 | 5,89E-02  | 2,12294877   | 1,73E-01 | 6,78E-01 | 8,92E-01 | Trmt10a | 1,04 | No  |
| ENSMUSG00000004151 | 7,54E-01  | 1,4800265    | 1,49E+01 | 1,12E-04 | 2,67E-03 | Etv1    | 1,69 | Yes |
| ENSMUSG00000004187 | -1,73E-01 | 1,320791626  | 8,36E-01 | 3,61E-01 | 6,62E-01 | Kifc2   | 0,89 | No  |
| ENSMUSG00000004207 | 2,00E-01  | 13,64429858  | 1,29E+01 | 3,35E-04 | 6,63E-03 | Psap    | 1,15 | Yes |
| ENSMUSG00000004233 | 2,38E-03  | 3,088335154  | 4,72E-04 | 9,83E-01 | 1,00E+00 | Wars2   | 1,00 | No  |
| ENSMUSG00000004263 | -8,00E-02 | 5,134629005  | 1,22E+00 | 2,70E-01 | 5,66E-01 | Atn1    | 0,95 | No  |
| ENSMUSG00000004264 | -5,13E-02 | 6,778991716  | 6,94E-01 | 4,05E-01 | 7,02E-01 | Phb2    | 0,97 | No  |
| ENSMUSG00000004266 | -2,13E-02 | 7,521493068  | 1,29E-01 | 7,19E-01 | 9,15E-01 | Ptpn6   | 0,99 | No  |
| ENSMUSG00000004267 | -5,82E-01 | 2,664278076  | 2,27E+01 | 1,88E-06 | 7,70E-05 | Eno2    | 0,67 | Yes |
| ENSMUSG00000004268 | 4,64E-02  | 5,52004161   | 4,49E-01 | 5,03E-01 | 7,88E-01 | Emg1    | 1,03 | No  |
| ENSMUSG00000004270 | 2,75E-01  | 6,036918504  | 1,76E+01 | 2,76E-05 | 8,17E-04 | Lpcat3  | 1,21 | Yes |
| ENSMUSG00000004285 | -2,70E-02 | 6,690051967  | 1,90E-01 | 6,63E-01 | 8,83E-01 | Atp6v1f | 0,98 | No  |
| ENSMUSG00000004296 | -1,04E+00 | 3,070838541  | 8,73E+01 | 9,16E-21 | 2,18E-18 | Il12b   | 0,49 | Yes |
| ENSMUSG00000004319 | 1,31E-01  | 6,143157224  | 4,12E+00 | 4,23E-02 | 2,45E-01 | Clcn3   | 1,10 | No  |
| ENSMUSG00000004328 | 1,24E+00  | -2,311211973 | 2,09E+00 | 1,49E-01 | 4,89E-01 | Hif3a   | 2,36 | No  |
| ENSMUSG00000004344 | -1,87E+00 | -3,107637761 | 1,39E+00 | 2,38E-01 | 5,50E-01 | Gpx5    | 0,27 | No  |
| ENSMUSG00000004347 | -1,70E-01 | -1,333295691 | 1,18E-01 | 7,31E-01 | 9,22E-01 | Pde1c   | 0,89 | No  |
| ENSMUSG00000004356 | 2,25E-01  | 5,784242585  | 1,13E+01 | 7,73E-04 | 1,31E-02 | Utp20   | 1,17 | Yes |
| ENSMUSG00000004359 | -5,82E-01 | 0,52750837   | 5,87E+00 | 1,54E-02 | 1,28E-01 | Spic    | 0,67 | No  |
| ENSMUSG00000004364 | -1,25E-01 | 6,680488553  | 4,05E+00 | 4,40E-02 | 2,50E-01 | Cul3    | 0,92 | No  |
| ENSMUSG00000004371 | 1,16E+00  | -1,816474764 | 3,23E+00 | 7,23E-02 | 3,41E-01 | Il11    | 2,23 | No  |
| ENSMUSG00000004383 | -2,13E-01 | 5,666806798  | 9,95E+00 | 1,61E-03 | 2,35E-02 | Large1  | 0,86 | Yes |
| ENSMUSG00000004393 | 3,02E-02  | 4,862641882  | 1,60E-01 | 6,90E-01 | 8,99E-01 | Ddx56   | 1,02 | No  |
| ENSMUSG00000004394 | -2,04E-02 | 5,860545216  | 9,41E-02 | 7,59E-01 | 9,36E-01 | Tmed4   | 0,99 | No  |
| ENSMUSG00000004446 | 3,84E-01  | 5,103925564  | 2,73E+01 | 1,73E-07 | 9,17E-06 | Bid     | 1,31 | Yes |
| ENSMUSG00000004451 | 6,71E-02  | 6,833761518  | 1,19E+00 | 2,75E-01 | 5,71E-01 | Ralb    | 1,05 | No  |
| ENSMUSG00000004455 | 1,53E-02  | 6,059456993  | 5,50E-02 | 8,15E-01 | 9,68E-01 | Ppp1cc  | 1,01 | No  |
| ENSMUSG00000004460 | 6,70E-02  | 6,927311617  | 1,20E+00 | 2,73E-01 | 5,69E-01 | Dnajb11 | 1,05 | No  |
| ENSMUSG00000004462 | 1,17E-01  | 4,237575551  | 1,92E+00 | 1,66E-01 | 5,19E-01 | Tbccd1  | 1,08 | No  |

|                    |           |              |          |          |          |          |      |     |
|--------------------|-----------|--------------|----------|----------|----------|----------|------|-----|
| ENSMUSG00000004473 | -5,01E-02 | 0,899320114  | 5,40E-02 | 8,16E-01 | 9,69E-01 | Clec11a  | 0,97 | No  |
| ENSMUSG00000004500 | 3,95E-01  | 2,680003525  | 1,08E+01 | 9,89E-04 | 1,60E-02 | Zfp324   | 1,31 | Yes |
| ENSMUSG00000004508 | 5,96E-02  | 6,614184174  | 9,18E-01 | 3,38E-01 | 6,38E-01 | Gab2     | 1,04 | No  |
| ENSMUSG00000004530 | 2,76E-01  | 7,946843694  | 2,24E+01 | 2,26E-06 | 9,02E-05 | Coro1c   | 1,21 | Yes |
| ENSMUSG00000004535 | -1,17E-01 | 7,545101826  | 3,90E+00 | 4,83E-02 | 2,64E-01 | Tax1bp1  | 0,92 | No  |
| ENSMUSG00000004552 | 3,93E-01  | 2,292024464  | 7,91E+00 | 4,91E-03 | 5,52E-02 | Ctse     | 1,31 | No  |
| ENSMUSG00000004558 | -3,41E-01 | 3,268483109  | 1,07E+01 | 1,09E-03 | 1,73E-02 | Ndrp2    | 0,79 | Yes |
| ENSMUSG00000004561 | 9,31E-02  | 4,548534984  | 1,37E+00 | 2,41E-01 | 5,50E-01 | Mettl17  | 1,07 | No  |
| ENSMUSG00000004562 | -1,72E-01 | 7,411260846  | 8,39E+00 | 3,77E-03 | 4,53E-02 | Arhgef40 | 0,89 | Yes |
| ENSMUSG00000004565 | -8,75E-02 | 5,497498039  | 1,62E+00 | 2,03E-01 | 5,50E-01 | Pnpla6   | 0,94 | No  |
| ENSMUSG00000004567 | 5,77E-02  | 6,109496228  | 7,94E-01 | 3,73E-01 | 6,74E-01 | Mcoln1   | 1,04 | No  |
| ENSMUSG00000004568 | 1,08E-01  | 4,050853791  | 1,49E+00 | 2,22E-01 | 5,50E-01 | Arhgef18 | 1,08 | No  |
| ENSMUSG00000004591 | -1,10E-01 | 5,74824178   | 2,71E+00 | 9,99E-02 | 3,92E-01 | Pkn2     | 0,93 | No  |
| ENSMUSG00000004609 | 3,89E-01  | 8,396696808  | 4,53E+01 | 1,67E-11 | 1,74E-09 | Cd33     | 1,31 | Yes |
| ENSMUSG00000004610 | 1,47E-01  | 5,833687388  | 4,85E+00 | 2,77E-02 | 1,87E-01 | Etfb     | 1,11 | No  |
| ENSMUSG00000004612 | -5,50E-01 | -2,548167825 | 2,37E-01 | 6,26E-01 | 8,60E-01 | Nkg7     | 0,68 | No  |
| ENSMUSG00000004626 | 1,40E-02  | 6,934109688  | 5,28E-02 | 8,18E-01 | 9,70E-01 | Stxbp2   | 1,01 | No  |
| ENSMUSG00000004630 | 8,87E-02  | 0,392569298  | 1,26E-01 | 7,23E-01 | 9,17E-01 | Pcp2     | 1,06 | No  |
| ENSMUSG00000004631 | 2,46E-01  | -2,548244856 | 7,65E-02 | 7,82E-01 | 9,50E-01 | Sgce     | 1,19 | No  |
| ENSMUSG00000004633 | 6,39E-02  | 4,657269545  | 6,65E-01 | 4,15E-01 | 7,10E-01 | Chn2     | 1,05 | No  |
| ENSMUSG00000004637 | -3,82E-02 | 2,950809204  | 1,13E-01 | 7,37E-01 | 9,25E-01 | Wwox     | 0,97 | No  |
| ENSMUSG00000004642 | 1,33E-01  | 5,140058244  | 3,40E+00 | 6,52E-02 | 3,20E-01 | Slbp     | 1,10 | No  |
| ENSMUSG00000004655 | 7,32E-01  | -2,770630356 | 2,92E-01 | 5,89E-01 | 8,41E-01 | Aqp1     | 1,66 | No  |
| ENSMUSG00000004661 | 1,22E-02  | 4,455143152  | 2,28E-02 | 8,80E-01 | 1,00E+00 | Arid3b   | 1,01 | No  |
| ENSMUSG00000004665 | -4,59E-01 | 7,604700485  | 6,06E+01 | 7,14E-15 | 1,08E-12 | Cnn2     | 0,73 | Yes |
| ENSMUSG00000004667 | -1,39E-01 | 5,864305602  | 4,38E+00 | 3,63E-02 | 2,26E-01 | Polr2e   | 0,91 | No  |
| ENSMUSG00000004668 | -5,85E-02 | -0,497794647 | 2,94E-02 | 8,64E-01 | 9,97E-01 | Abca13   | 0,96 | No  |
| ENSMUSG00000004677 | -5,43E-02 | 8,855565789  | 9,08E-01 | 3,41E-01 | 6,41E-01 | Myo9b    | 0,96 | No  |
| ENSMUSG00000004698 | -3,95E-03 | 2,684555083  | 1,04E-03 | 9,74E-01 | 1,00E+00 | Hdac9    | 1,00 | No  |
| ENSMUSG00000004707 | 4,45E-02  | 5,605673853  | 4,26E-01 | 5,14E-01 | 7,96E-01 | Ly9      | 1,03 | No  |
| ENSMUSG00000004709 | 1,56E-01  | 5,86827344   | 5,59E+00 | 1,81E-02 | 1,41E-01 | Cd244    | 1,11 | No  |
| ENSMUSG00000004730 | -7,70E-02 | 7,102502746  | 1,62E+00 | 2,04E-01 | 5,50E-01 | Adgre1   | 0,95 | No  |

|                    |           |              |          |          |          |          |      |     |
|--------------------|-----------|--------------|----------|----------|----------|----------|------|-----|
| ENSMUSG00000004748 | 4,56E-01  | 0,731617125  | 3,98E+00 | 4,60E-02 | 2,56E-01 | Mtfp1    | 1,37 | No  |
| ENSMUSG00000004768 | 1,37E-01  | 3,125106909  | 1,59E+00 | 2,07E-01 | 5,50E-01 | Rab23    | 1,10 | No  |
| ENSMUSG00000004771 | 5,86E-03  | 6,600449287  | 8,88E-03 | 9,25E-01 | 1,00E+00 | Rab11a   | 1,00 | No  |
| ENSMUSG00000004788 | -1,39E-01 | 5,644446263  | 4,18E+00 | 4,10E-02 | 2,40E-01 | Eif2b2   | 0,91 | No  |
| ENSMUSG00000004789 | -3,36E-02 | 7,476536336  | 3,22E-01 | 5,71E-01 | 8,31E-01 | Dlst     | 0,98 | No  |
| ENSMUSG00000004791 | -3,32E-01 | 4,853405932  | 1,88E+01 | 1,42E-05 | 4,56E-04 | Pgf      | 0,79 | Yes |
| ENSMUSG00000004798 | 3,71E-02  | 5,899782165  | 3,17E-01 | 5,74E-01 | 8,33E-01 | Ulk2     | 1,03 | No  |
| ENSMUSG00000004814 | 4,26E-01  | -1,655066518 | 6,48E-01 | 4,21E-01 | 7,16E-01 | Ccl24    | 1,34 | No  |
| ENSMUSG00000004815 | 6,31E-02  | 4,692416281  | 6,66E-01 | 4,14E-01 | 7,10E-01 | Dgkq     | 1,04 | No  |
| ENSMUSG00000004837 | 4,25E-01  | 3,798640771  | 2,12E+01 | 4,18E-06 | 1,55E-04 | Grap     | 1,34 | Yes |
| ENSMUSG00000004842 | -1,92E+00 | -2,963214917 | 1,46E+00 | 2,27E-01 | 5,50E-01 | Pou1f1   | 0,26 | No  |
| ENSMUSG00000004843 | 8,49E-05  | 6,306999074  | 1,78E-06 | 9,99E-01 | 1,00E+00 | Chmp2b   | 1,00 | No  |
| ENSMUSG00000004846 | 1,26E-01  | 6,475653694  | 3,97E+00 | 4,63E-02 | 2,57E-01 | Plod3    | 1,09 | No  |
| ENSMUSG00000004849 | 3,36E-02  | 6,631852792  | 2,92E-01 | 5,89E-01 | 8,41E-01 | Ap1s1    | 1,02 | No  |
| ENSMUSG00000004864 | -4,15E-01 | 4,00277918   | 2,23E+01 | 2,37E-06 | 9,41E-05 | Mapk13   | 0,75 | Yes |
| ENSMUSG00000004865 | -4,32E-02 | 5,858023238  | 4,27E-01 | 5,14E-01 | 7,96E-01 | Srpk1    | 0,97 | No  |
| ENSMUSG00000004880 | 6,41E-03  | 5,378101479  | 8,33E-03 | 9,27E-01 | 1,00E+00 | Lbr      | 1,00 | No  |
| ENSMUSG00000004885 | 1,35E+00  | -2,548284495 | 1,86E+00 | 1,73E-01 | 5,30E-01 | Crabp2   | 2,55 | No  |
| ENSMUSG00000004891 | 6,89E-01  | 3,024569209  | 3,68E+01 | 1,30E-09 | 1,04E-07 | Nes      | 1,61 | Yes |
| ENSMUSG00000004894 | -1,87E+00 | -3,107637761 | 1,39E+00 | 2,38E-01 | 5,50E-01 | Hapln2   | 0,27 | No  |
| ENSMUSG00000004895 | 7,70E-03  | 5,104447423  | 1,13E-02 | 9,15E-01 | 1,00E+00 | Prcc     | 1,01 | No  |
| ENSMUSG00000004896 | -1,63E-02 | 4,726436025  | 4,49E-02 | 8,32E-01 | 9,78E-01 | Rrnad1   | 0,99 | No  |
| ENSMUSG00000004897 | -2,25E-03 | 7,653194206  | 1,46E-03 | 9,70E-01 | 1,00E+00 | Hdgf     | 1,00 | No  |
| ENSMUSG00000004902 | 4,40E-02  | 1,11029187   | 4,62E-02 | 8,30E-01 | 9,77E-01 | Slc25a18 | 1,03 | No  |
| ENSMUSG00000004929 | 1,84E-01  | 4,470376895  | 5,12E+00 | 2,36E-02 | 1,69E-01 | Thop1    | 1,14 | No  |
| ENSMUSG00000004931 | 1,58E-01  | 4,800436821  | 4,24E+00 | 3,95E-02 | 2,36E-01 | Apba3    | 1,12 | No  |
| ENSMUSG00000004933 | 9,06E-02  | 4,309427944  | 1,19E+00 | 2,76E-01 | 5,72E-01 | Matk     | 1,06 | No  |
| ENSMUSG00000004934 | 7,02E-02  | 4,821434535  | 8,47E-01 | 3,57E-01 | 6,59E-01 | Pias4    | 1,05 | No  |
| ENSMUSG00000004936 | 7,92E-03  | 6,861751727  | 1,68E-02 | 8,97E-01 | 1,00E+00 | Map2k1   | 1,01 | No  |
| ENSMUSG00000004937 | 6,11E-02  | 6,092616257  | 8,86E-01 | 3,47E-01 | 6,47E-01 | Sgta     | 1,04 | No  |
| ENSMUSG00000004945 | -7,40E-02 | 4,983655401  | 9,94E-01 | 3,19E-01 | 6,19E-01 | Tmem242  | 0,95 | No  |
| ENSMUSG00000004947 | 6,71E-02  | 4,29160109   | 6,44E-01 | 4,22E-01 | 7,18E-01 | Dtx2     | 1,05 | No  |

|                    |           |              |          |          |          |               |      |     |
|--------------------|-----------|--------------|----------|----------|----------|---------------|------|-----|
| ENSMUSG00000004951 | -8,82E-01 | -1,963171952 | 1,40E+00 | 2,37E-01 | 5,50E-01 | Hspb1         | 0,54 | No  |
| ENSMUSG00000004952 | 5,01E-02  | 5,83244449   | 5,68E-01 | 4,51E-01 | 7,41E-01 | Rasa4         | 1,04 | No  |
| ENSMUSG00000004961 | 1,19E-01  | -2,146142839 | 2,79E-02 | 8,67E-01 | 9,99E-01 | Syt5          | 1,09 | No  |
| ENSMUSG00000004980 | -1,56E-02 | 9,057178532  | 7,56E-02 | 7,83E-01 | 9,50E-01 | Hnrnpa2b1     | 0,99 | No  |
| ENSMUSG00000004988 | -2,50E-01 | -1,226298777 | 2,49E-01 | 6,18E-01 | 8,55E-01 | Fxyd4         | 0,84 | No  |
| ENSMUSG00000004994 | 1,89E-01  | 3,393564754  | 3,47E+00 | 6,24E-02 | 3,11E-01 | Ccdc130       | 1,14 | No  |
| ENSMUSG00000004996 | 2,30E-01  | 4,545365532  | 8,36E+00 | 3,83E-03 | 4,58E-02 | Mri1          | 1,17 | Yes |
| ENSMUSG00000005034 | 1,47E-01  | 6,754442128  | 5,64E+00 | 1,75E-02 | 1,38E-01 | Prkacb        | 1,11 | No  |
| ENSMUSG00000005043 | 4,63E-01  | 3,877216933  | 2,54E+01 | 4,67E-07 | 2,24E-05 | Sgsh          | 1,38 | Yes |
| ENSMUSG00000005045 | 5,24E-01  | 3,316359829  | 2,50E+01 | 5,61E-07 | 2,65E-05 | Chd5          | 1,44 | Yes |
| ENSMUSG00000005054 | 2,55E-02  | 7,994104329  | 1,92E-01 | 6,61E-01 | 8,82E-01 | Cstb          | 1,02 | No  |
| ENSMUSG00000005057 | 2,20E-01  | 3,771048218  | 5,56E+00 | 1,83E-02 | 1,43E-01 | Sh2b2         | 1,16 | No  |
| ENSMUSG00000005069 | -2,73E-02 | 5,075780024  | 1,40E-01 | 7,08E-01 | 9,09E-01 | Pex5          | 0,98 | No  |
| ENSMUSG00000005078 | 1,59E-01  | 4,274135533  | 3,56E+00 | 5,91E-02 | 3,01E-01 | Jkamp         | 1,12 | No  |
| ENSMUSG00000005087 | 6,42E-02  | 9,116195627  | 1,28E+00 | 2,59E-01 | 5,51E-01 | Cd44          | 1,05 | No  |
| ENSMUSG00000005089 | -1,04E+00 | -1,024477021 | 5,06E+00 | 2,45E-02 | 1,72E-01 | Slc1a2        | 0,49 | No  |
| ENSMUSG00000005102 | 9,21E-03  | 5,644295344  | 1,83E-02 | 8,92E-01 | 1,00E+00 | Eif2ak4       | 1,01 | No  |
| ENSMUSG00000005103 | -1,66E-01 | 9,13716327   | 8,51E+00 | 3,54E-03 | 4,32E-02 | Wdr1          | 0,89 | Yes |
| ENSMUSG00000005107 | 2,21E-01  | 2,40277082   | 2,74E+00 | 9,76E-02 | 3,90E-01 | Slc2a9        | 1,17 | No  |
| ENSMUSG00000005124 | -5,29E-01 | -2,770601222 | 2,18E-01 | 6,41E-01 | 8,70E-01 | Wisp1         | 0,69 | No  |
| ENSMUSG00000005125 | -1,71E-01 | 6,197494772  | 7,10E+00 | 7,69E-03 | 7,68E-02 | Ndrgr1        | 0,89 | No  |
| ENSMUSG00000005131 | -1,45E+00 | -1,832037058 | 3,75E+00 | 5,28E-02 | 2,80E-01 | 4930550C14Rik | 0,37 | No  |
| ENSMUSG00000005142 | 1,44E-01  | 9,047585765  | 6,44E+00 | 1,11E-02 | 1,01E-01 | Man2b1        | 1,11 | No  |
| ENSMUSG00000005148 | 6,66E-01  | -2,268144305 | 6,42E-01 | 4,23E-01 | 7,18E-01 | Klf5          | 1,59 | No  |
| ENSMUSG00000005150 | -4,28E-02 | 3,953666819  | 2,27E-01 | 6,34E-01 | 8,66E-01 | Wdr83         | 0,97 | No  |
| ENSMUSG00000005161 | -8,65E-02 | 6,767248524  | 1,98E+00 | 1,59E-01 | 5,07E-01 | Prdx2         | 0,94 | No  |
| ENSMUSG00000005198 | 1,09E-01  | 8,250278328  | 3,53E+00 | 6,01E-02 | 3,03E-01 | Polr2a        | 1,08 | No  |
| ENSMUSG00000005204 | 1,38E-01  | 6,232577608  | 4,66E+00 | 3,08E-02 | 2,03E-01 | Senp3         | 1,10 | No  |
| ENSMUSG00000005220 | 3,07E-01  | -2,033638744 | 1,73E-01 | 6,77E-01 | 8,92E-01 | Corin         | 1,24 | No  |
| ENSMUSG00000005225 | -1,66E-01 | 3,712341337  | 3,09E+00 | 7,87E-02 | 3,59E-01 | Plekha8       | 0,89 | No  |
| ENSMUSG00000005233 | 8,49E-02  | 4,671263566  | 1,17E+00 | 2,79E-01 | 5,75E-01 | Spc25         | 1,06 | No  |
| ENSMUSG00000005237 | -1,02E+00 | 3,223433955  | 9,40E+01 | 3,22E-22 | 9,19E-20 | Dnah2         | 0,49 | Yes |

|                    |           |              |          |          |          |          |      |     |
|--------------------|-----------|--------------|----------|----------|----------|----------|------|-----|
| ENSMUSG00000005251 | -1,50E+00 | -0,0154297   | 2,60E+01 | 3,42E-07 | 1,69E-05 | Ripk4    | 0,35 | Yes |
| ENSMUSG00000005262 | -2,22E-02 | 5,149376538  | 9,31E-02 | 7,60E-01 | 9,37E-01 | Ufd1     | 0,98 | No  |
| ENSMUSG00000005267 | 2,09E-01  | 3,17794084   | 3,85E+00 | 4,98E-02 | 2,70E-01 | Zfp287   | 1,16 | No  |
| ENSMUSG00000005268 | -2,69E+00 | -2,929262057 | 2,87E+00 | 9,03E-02 | 3,81E-01 | Prlr     | 0,16 | No  |
| ENSMUSG00000005299 | 1,98E-02  | 5,957876111  | 9,10E-02 | 7,63E-01 | 9,38E-01 | Letm1    | 1,01 | No  |
| ENSMUSG00000005312 | 2,52E-02  | 7,060160623  | 1,73E-01 | 6,77E-01 | 8,92E-01 | Ubqln1   | 1,02 | No  |
| ENSMUSG00000005338 | -5,43E-01 | -0,205589127 | 3,24E+00 | 7,17E-02 | 3,39E-01 | Cadm3    | 0,69 | No  |
| ENSMUSG00000005339 | -2,65E+00 | -3,033633091 | 2,78E+00 | 9,55E-02 | 3,86E-01 | Fcer1a   | 0,16 | No  |
| ENSMUSG00000005354 | 9,27E-02  | 7,048526662  | 2,34E+00 | 1,26E-01 | 4,45E-01 | Txn2     | 1,07 | No  |
| ENSMUSG00000005360 | -2,33E+00 | -2,35556104  | 7,29E+00 | 6,95E-03 | 7,13E-02 | Slc1a3   | 0,20 | No  |
| ENSMUSG00000005362 | -7,19E-02 | 4,903460626  | 9,21E-01 | 3,37E-01 | 6,38E-01 | Crbn     | 0,95 | No  |
| ENSMUSG00000005364 | 1,14E+00  | -2,600685118 | 1,24E+00 | 2,65E-01 | 5,60E-01 | Il5ra    | 2,21 | No  |
| ENSMUSG00000005370 | 1,40E-01  | 5,035797829  | 3,65E+00 | 5,62E-02 | 2,91E-01 | Msh6     | 1,10 | No  |
| ENSMUSG00000005371 | -1,65E-01 | 5,673459188  | 5,97E+00 | 1,46E-02 | 1,23E-01 | Fbxo11   | 0,89 | No  |
| ENSMUSG00000005373 | -3,57E+00 | -2,711650889 | 5,74E+00 | 1,66E-02 | 1,34E-01 | Mlxipl   | 0,08 | No  |
| ENSMUSG00000005374 | 1,61E-01  | 4,592183696  | 4,07E+00 | 4,36E-02 | 2,49E-01 | Tbl2     | 1,12 | No  |
| ENSMUSG00000005378 | -1,17E-02 | 4,574339624  | 2,15E-02 | 8,84E-01 | 1,00E+00 | Wbscr22  | 0,99 | No  |
| ENSMUSG00000005397 | -1,14E+00 | 0,678328311  | 2,53E+01 | 4,86E-07 | 2,32E-05 | Nid1     | 0,46 | Yes |
| ENSMUSG00000005410 | 1,21E-01  | 6,64550219   | 3,79E+00 | 5,16E-02 | 2,76E-01 | Mcm5     | 1,09 | No  |
| ENSMUSG00000005413 | 1,13E-01  | 7,581279181  | 3,68E+00 | 5,50E-02 | 2,87E-01 | Hmox1    | 1,08 | No  |
| ENSMUSG00000005417 | -1,03E-01 | 6,78571301   | 2,81E+00 | 9,39E-02 | 3,84E-01 | Mprrip   | 0,93 | No  |
| ENSMUSG00000005442 | 8,27E-02  | 8,379184831  | 2,06E+00 | 1,51E-01 | 4,93E-01 | Cic      | 1,06 | No  |
| ENSMUSG00000005447 | -2,02E-01 | 4,097635415  | 5,45E+00 | 1,96E-02 | 1,49E-01 | Pafah1b3 | 0,87 | No  |
| ENSMUSG00000005465 | -3,62E-01 | 2,74289028   | 9,12E+00 | 2,53E-03 | 3,36E-02 | Il27ra   | 0,78 | Yes |
| ENSMUSG00000005469 | 1,21E-01  | 6,141136868  | 3,55E+00 | 5,95E-02 | 3,02E-01 | Prkaca   | 1,09 | No  |
| ENSMUSG00000005470 | 2,37E-01  | 5,775018698  | 1,24E+01 | 4,31E-04 | 8,10E-03 | Asf1b    | 1,18 | Yes |
| ENSMUSG00000005474 | 8,81E-02  | -1,205858293 | 3,44E-02 | 8,53E-01 | 9,91E-01 | Myl10    | 1,06 | No  |
| ENSMUSG00000005481 | -3,23E-02 | 6,181337752  | 2,51E-01 | 6,16E-01 | 8,55E-01 | Ddx39    | 0,98 | No  |
| ENSMUSG00000005483 | 7,91E-02  | 5,689710419  | 1,37E+00 | 2,42E-01 | 5,50E-01 | Dnajb1   | 1,06 | No  |
| ENSMUSG00000005493 | 3,45E-01  | -2,548108026 | 1,21E-01 | 7,28E-01 | 9,19E-01 | Msh4     | 1,27 | No  |
| ENSMUSG00000005501 | -5,41E-02 | 4,260636939  | 4,26E-01 | 5,14E-01 | 7,96E-01 | Usp40    | 0,96 | No  |
| ENSMUSG00000005505 | -1,80E-02 | 4,189054276  | 4,48E-02 | 8,32E-01 | 9,78E-01 | Kbtbd4   | 0,99 | No  |



|                    |           |              |          |          |          |         |      |     |
|--------------------|-----------|--------------|----------|----------|----------|---------|------|-----|
| ENSMUSG00000005506 | 5,94E-02  | 6,977088976  | 9,61E-01 | 3,27E-01 | 6,28E-01 | Celf1   | 1,04 | No  |
| ENSMUSG00000005510 | -4,39E-02 | 3,529830106  | 2,00E-01 | 6,55E-01 | 8,79E-01 | Ndufs3  | 0,97 | No  |
| ENSMUSG00000005514 | 1,48E-01  | 5,788327222  | 4,89E+00 | 2,70E-02 | 1,85E-01 | Por     | 1,11 | No  |
| ENSMUSG00000005533 | -1,45E-01 | 4,100385376  | 2,77E+00 | 9,61E-02 | 3,87E-01 | Igf1r   | 0,90 | No  |
| ENSMUSG00000005534 | 7,56E-02  | 6,495929718  | 1,45E+00 | 2,29E-01 | 5,50E-01 | Insr    | 1,05 | No  |
| ENSMUSG00000005540 | -3,94E-01 | -2,401342266 | 1,96E-01 | 6,58E-01 | 8,81E-01 | Fcer2a  | 0,76 | No  |
| ENSMUSG00000005547 | 1,87E+00  | -3,107639691 | 1,38E+00 | 2,40E-01 | 5,50E-01 | Cyp2a5  | 3,67 | No  |
| ENSMUSG00000005553 | -7,32E-02 | -2,35544627  | 6,13E-03 | 9,38E-01 | 1,00E+00 | Atp4a   | 0,95 | No  |
| ENSMUSG00000005566 | 2,22E-02  | 7,049933813  | 1,34E-01 | 7,14E-01 | 9,12E-01 | Trim28  | 1,02 | No  |
| ENSMUSG00000005575 | 3,34E-02  | 6,148074622  | 2,68E-01 | 6,05E-01 | 8,49E-01 | Ube2m   | 1,02 | No  |
| ENSMUSG00000005580 | 2,26E-01  | 3,81341291   | 5,90E+00 | 1,51E-02 | 1,27E-01 | Adcy9   | 1,17 | No  |
| ENSMUSG00000005583 | 2,65E-01  | 3,689695973  | 7,63E+00 | 5,75E-03 | 6,20E-02 | Mef2c   | 1,20 | No  |
| ENSMUSG00000005609 | 1,45E-01  | 4,776846583  | 3,64E+00 | 5,66E-02 | 2,92E-01 | Ctr9    | 1,11 | No  |
| ENSMUSG00000005610 | 3,26E-02  | 9,679504508  | 3,34E-01 | 5,63E-01 | 8,26E-01 | Eif4g2  | 1,02 | No  |
| ENSMUSG00000005611 | 2,98E-01  | -0,366938118 | 7,97E-01 | 3,72E-01 | 6,73E-01 | Mrv1    | 1,23 | No  |
| ENSMUSG00000005615 | -1,90E-01 | 7,516167266  | 1,03E+01 | 1,31E-03 | 2,01E-02 | Pcyt1a  | 0,88 | Yes |
| ENSMUSG00000005621 | 8,60E-02  | 6,161736082  | 1,78E+00 | 1,82E-01 | 5,43E-01 | Zfp592  | 1,06 | No  |
| ENSMUSG00000005625 | -1,08E-01 | 6,121869596  | 2,80E+00 | 9,40E-02 | 3,84E-01 | Psm4    | 0,93 | No  |
| ENSMUSG00000005628 | 4,69E-01  | -1,0611013   | 1,07E+00 | 3,00E-01 | 5,96E-01 | Tmod4   | 1,38 | No  |
| ENSMUSG00000005640 | -2,66E+00 | -2,770571569 | 2,82E+00 | 9,29E-02 | 3,83E-01 | Insrr   | 0,16 | No  |
| ENSMUSG00000005656 | -2,22E-02 | 5,95893589   | 1,14E-01 | 7,35E-01 | 9,24E-01 | Snx6    | 0,98 | No  |
| ENSMUSG00000005667 | -1,74E-01 | 6,08484121   | 7,21E+00 | 7,26E-03 | 7,38E-02 | Mthfd2  | 0,89 | No  |
| ENSMUSG00000005672 | 1,87E-01  | 5,646066363  | 7,52E+00 | 6,10E-03 | 6,49E-02 | Kit     | 1,14 | No  |
| ENSMUSG00000005674 | 1,06E-01  | 3,991722918  | 1,42E+00 | 2,34E-01 | 5,50E-01 | Tomm40l | 1,08 | No  |
| ENSMUSG00000005677 | 2,94E-02  | 3,341649126  | 8,03E-02 | 7,77E-01 | 9,46E-01 | Nr1i3   | 1,02 | No  |
| ENSMUSG00000005681 | -7,69E-01 | -0,711716198 | 3,83E+00 | 5,04E-02 | 2,72E-01 | Apoa2   | 0,59 | No  |
| ENSMUSG00000005682 | -4,72E-02 | 4,646888909  | 3,66E-01 | 5,45E-01 | 8,13E-01 | Pan2    | 0,97 | No  |
| ENSMUSG00000005683 | 3,57E-02  | 8,160050814  | 3,80E-01 | 5,38E-01 | 8,09E-01 | Cs      | 1,03 | No  |
| ENSMUSG00000005686 | 2,16E-01  | 3,985015459  | 5,89E+00 | 1,52E-02 | 1,27E-01 | Ampd3   | 1,16 | No  |
| ENSMUSG00000005687 | 3,77E-02  | 5,304193288  | 2,85E-01 | 5,93E-01 | 8,43E-01 | Bcas2   | 1,03 | No  |
| ENSMUSG00000005698 | 7,58E-03  | 6,503600507  | 1,47E-02 | 9,04E-01 | 1,00E+00 | Ctcf    | 1,01 | No  |
| ENSMUSG00000005699 | 3,00E-01  | 2,61858811   | 6,00E+00 | 1,43E-02 | 1,22E-01 | Pard6a  | 1,23 | No  |

|                    |           |              |          |          |          |         |      |     |
|--------------------|-----------|--------------|----------|----------|----------|---------|------|-----|
| ENSMUSG00000005705 | -1,04E-01 | -1,015963107 | 5,93E-02 | 8,08E-01 | 9,64E-01 | Agrp    | 0,93 | No  |
| ENSMUSG00000005716 | 7,18E-01  | -2,96326129  | 2,80E-01 | 5,97E-01 | 8,45E-01 | Pvalb   | 1,65 | No  |
| ENSMUSG00000005718 | 4,58E-01  | 1,236543491  | 6,19E+00 | 1,28E-02 | 1,12E-01 | Tfap4   | 1,37 | No  |
| ENSMUSG00000005732 | 1,18E-01  | 5,915067953  | 3,20E+00 | 7,36E-02 | 3,45E-01 | Ranbp1  | 1,09 | No  |
| ENSMUSG00000005763 | -2,37E-01 | 2,629682984  | 3,65E+00 | 5,60E-02 | 2,90E-01 | Cd247   | 0,85 | No  |
| ENSMUSG00000005774 | -1,42E-01 | 4,459534227  | 3,16E+00 | 7,53E-02 | 3,49E-01 | Rfx5    | 0,91 | No  |
| ENSMUSG00000005779 | 5,29E-03  | 6,800739474  | 7,41E-03 | 9,31E-01 | 1,00E+00 | Psmb4   | 1,00 | No  |
| ENSMUSG00000005800 | -4,08E-01 | 8,781138863  | 5,03E+01 | 1,32E-12 | 1,60E-10 | Mmp8    | 0,75 | Yes |
| ENSMUSG00000005802 | -4,38E-02 | 7,055019281  | 5,21E-01 | 4,70E-01 | 7,59E-01 | Slc30a4 | 0,97 | No  |
| ENSMUSG00000005803 | 7,53E-02  | 5,504165065  | 1,18E+00 | 2,77E-01 | 5,74E-01 | Sqor    | 1,05 | No  |
| ENSMUSG00000005804 | -1,36E-01 | 5,96255335   | 4,30E+00 | 3,81E-02 | 2,32E-01 | Bloc1s6 | 0,91 | No  |
| ENSMUSG00000005813 | -3,71E-02 | 5,823330352  | 3,11E-01 | 5,77E-01 | 8,35E-01 | Metap1  | 0,97 | No  |
| ENSMUSG00000005823 | 5,47E-02  | 5,747004122  | 6,64E-01 | 4,15E-01 | 7,10E-01 | Gpr108  | 1,04 | No  |
| ENSMUSG00000005824 | 2,43E-01  | 2,562367671  | 3,55E+00 | 5,95E-02 | 3,02E-01 | Tnfsf14 | 1,18 | No  |
| ENSMUSG00000005836 | 1,07E+00  | -1,548234921 | 3,49E+00 | 6,19E-02 | 3,10E-01 | Gata6   | 2,10 | No  |
| ENSMUSG00000005846 | -2,71E-02 | 6,099245141  | 1,75E-01 | 6,76E-01 | 8,91E-01 | Rsl1d1  | 0,98 | No  |
| ENSMUSG00000005871 | 1,79E-01  | 6,450309322  | 8,11E+00 | 4,39E-03 | 5,07E-02 | Apc     | 1,13 | No  |
| ENSMUSG00000005873 | 6,27E-02  | 7,706135132  | 1,14E+00 | 2,86E-01 | 5,82E-01 | Reep5   | 1,04 | No  |
| ENSMUSG00000005881 | -3,94E-02 | 5,659361574  | 3,34E-01 | 5,63E-01 | 8,26E-01 | Ergic3  | 0,97 | No  |
| ENSMUSG00000005882 | -9,43E-03 | 4,099455576  | 1,17E-02 | 9,14E-01 | 1,00E+00 | Uqcc1   | 0,99 | No  |
| ENSMUSG00000005883 | -1,21E+00 | 0,062316792  | 1,80E+01 | 2,16E-05 | 6,66E-04 | Spo11   | 0,43 | Yes |
| ENSMUSG00000005886 | -2,15E-01 | 6,744511189  | 1,21E+01 | 4,95E-04 | 9,10E-03 | Ncoa2   | 0,86 | Yes |
| ENSMUSG00000005893 | -4,48E-02 | 5,721370133  | 4,48E-01 | 5,03E-01 | 7,88E-01 | Nr2c2   | 0,97 | No  |
| ENSMUSG00000005897 | 4,62E-02  | 3,798129799  | 2,54E-01 | 6,14E-01 | 8,53E-01 | Nr2c1   | 1,03 | No  |
| ENSMUSG00000005899 | 1,04E-01  | 5,330413348  | 2,19E+00 | 1,39E-01 | 4,71E-01 | Smpd4   | 1,08 | No  |
| ENSMUSG00000005907 | 1,25E-01  | 4,156833316  | 2,07E+00 | 1,50E-01 | 4,91E-01 | Pex1    | 1,09 | No  |
| ENSMUSG00000005917 | 2,68E-01  | -1,378211334 | 3,01E-01 | 5,83E-01 | 8,38E-01 | Otx1    | 1,20 | No  |
| ENSMUSG00000005936 | 1,01E-01  | 6,551078651  | 2,60E+00 | 1,07E-01 | 4,00E-01 | Kctd20  | 1,07 | No  |
| ENSMUSG00000005947 | 3,67E-01  | 5,99612037   | 3,06E+01 | 3,14E-08 | 1,95E-06 | Itgae   | 1,29 | Yes |
| ENSMUSG00000005949 | 1,07E-01  | 5,539506362  | 2,44E+00 | 1,19E-01 | 4,28E-01 | Ctns    | 1,08 | No  |
| ENSMUSG00000005950 | -2,60E-01 | 6,272799359  | 1,67E+01 | 4,31E-05 | 1,20E-03 | P2rx5   | 0,83 | Yes |
| ENSMUSG00000005951 | -2,00E-01 | 2,943483128  | 3,14E+00 | 7,64E-02 | 3,52E-01 | Shpk    | 0,87 | No  |

|                    |           |              |          |          |          |               |      |    |
|--------------------|-----------|--------------|----------|----------|----------|---------------|------|----|
| ENSMUSG00000005952 | -3,57E+00 | -2,831996158 | 5,74E+00 | 1,65E-02 | 1,34E-01 | Trpv1         | 0,08 | No |
| ENSMUSG00000005958 | 1,60E+00  | -2,655183664 | 1,76E+00 | 1,84E-01 | 5,48E-01 | Ephb3         | 3,04 | No |
| ENSMUSG00000005968 | 2,43E-01  | 1,543487671  | 1,95E+00 | 1,62E-01 | 5,12E-01 | Tuft1         | 1,18 | No |
| ENSMUSG00000005973 | 6,64E-02  | 1,368377427  | 1,24E-01 | 7,25E-01 | 9,18E-01 | Rcn1          | 1,05 | No |
| ENSMUSG00000005980 | 5,21E-02  | 1,656735379  | 9,78E-02 | 7,54E-01 | 9,34E-01 | Dnase1        | 1,04 | No |
| ENSMUSG00000005981 | -3,56E-02 | 5,992084763  | 2,96E-01 | 5,86E-01 | 8,39E-01 | Trap1         | 0,98 | No |
| ENSMUSG00000005982 | 8,96E-02  | 6,478016255  | 2,03E+00 | 1,54E-01 | 4,97E-01 | Naa60         | 1,06 | No |
| ENSMUSG00000005983 | 1,55E-01  | 3,970083096  | 3,02E+00 | 8,22E-02 | 3,68E-01 | 1700037C18Rik | 1,11 | No |
| ENSMUSG00000005986 | -6,38E-02 | 2,460788491  | 2,38E-01 | 6,26E-01 | 8,60E-01 | Ankrd13d      | 0,96 | No |
| ENSMUSG00000006005 | 7,15E-02  | 7,960506646  | 1,51E+00 | 2,20E-01 | 5,50E-01 | Tpr           | 1,05 | No |
| ENSMUSG00000006007 | -8,93E-02 | -2,96327978  | 3,63E-03 | 9,52E-01 | 1,00E+00 | Pdc           | 0,94 | No |
| ENSMUSG00000006010 | 5,24E-02  | 5,081329889  | 5,11E-01 | 4,75E-01 | 7,63E-01 | BC003331      | 1,04 | No |
| ENSMUSG00000006014 | -2,47E-01 | 1,074950322  | 1,60E+00 | 2,07E-01 | 5,50E-01 | Prg4          | 0,84 | No |
| ENSMUSG00000006019 | 1,85E-01  | 4,751481649  | 5,78E+00 | 1,62E-02 | 1,32E-01 | Dhx34         | 1,14 | No |
| ENSMUSG00000006021 | -9,38E-02 | 2,432100598  | 5,01E-01 | 4,79E-01 | 7,66E-01 | Kptn          | 0,94 | No |
| ENSMUSG00000006024 | -3,97E-02 | 6,893794638  | 4,23E-01 | 5,16E-01 | 7,97E-01 | Napa          | 0,97 | No |
| ENSMUSG00000006050 | -1,07E-02 | 5,38423596   | 2,34E-02 | 8,78E-01 | 1,00E+00 | Sra1          | 0,99 | No |
| ENSMUSG00000006057 | 4,05E-02  | 4,554964959  | 2,60E-01 | 6,10E-01 | 8,51E-01 | Atp5g1        | 1,03 | No |
| ENSMUSG00000006058 | -1,94E-01 | 4,837040731  | 6,57E+00 | 1,04E-02 | 9,58E-02 | Snf8          | 0,87 | No |
| ENSMUSG00000006095 | -1,35E-01 | 5,552402212  | 3,84E+00 | 4,99E-02 | 2,70E-01 | Tbcb          | 0,91 | No |
| ENSMUSG00000006127 | -4,21E-02 | 6,275650408  | 4,36E-01 | 5,09E-01 | 7,92E-01 | Inpp5k        | 0,97 | No |
| ENSMUSG00000006134 | 1,26E-01  | 5,671590613  | 3,52E+00 | 6,06E-02 | 3,05E-01 | Crkl          | 1,09 | No |
| ENSMUSG00000006143 | -1,94E+00 | -3,107619243 | 1,50E+00 | 2,21E-01 | 5,50E-01 | Upk3bl        | 0,26 | No |
| ENSMUSG00000006154 | -1,44E-01 | 3,180804282  | 1,87E+00 | 1,72E-01 | 5,28E-01 | Eps8l1        | 0,91 | No |
| ENSMUSG00000006169 | -9,59E-03 | 7,748085167  | 2,67E-02 | 8,70E-01 | 1,00E+00 | Clint1        | 0,99 | No |
| ENSMUSG00000006179 | 9,50E-02  | 1,474429589  | 2,87E-01 | 5,92E-01 | 8,42E-01 | Prss16        | 1,07 | No |
| ENSMUSG00000006191 | -1,92E-01 | 3,490142329  | 3,78E+00 | 5,20E-02 | 2,78E-01 | Cdkal1        | 0,88 | No |
| ENSMUSG00000006205 | -1,38E-01 | -0,389859527 | 1,91E-01 | 6,62E-01 | 8,83E-01 | Htra1         | 0,91 | No |
| ENSMUSG00000006215 | -1,79E-01 | 5,006696254  | 5,78E+00 | 1,62E-02 | 1,32E-01 | Zbtb17        | 0,88 | No |
| ENSMUSG00000006216 | -8,86E-01 | -2,289399721 | 1,05E+00 | 3,06E-01 | 6,04E-01 | Clcnkb        | 0,54 | No |
| ENSMUSG00000006219 | -5,65E-02 | 5,856819954  | 7,21E-01 | 3,96E-01 | 6,96E-01 | Fblim1        | 0,96 | No |
| ENSMUSG00000006221 | -1,08E+00 | -1,185649449 | 5,67E+00 | 1,72E-02 | 1,37E-01 | Hspb7         | 0,47 | No |

|                    |           |              |          |          |          |          |      |     |
|--------------------|-----------|--------------|----------|----------|----------|----------|------|-----|
| ENSMUSG00000006235 | -1,20E+00 | -2,070127633 | 1,88E+00 | 1,71E-01 | 5,26E-01 | Epor     | 0,43 | No  |
| ENSMUSG00000006241 | -3,26E-02 | -0,216043561 | 1,09E-02 | 9,17E-01 | 1,00E+00 | Ccdc159  | 0,98 | No  |
| ENSMUSG00000006262 | 6,02E-02  | 6,349428364  | 8,98E-01 | 3,43E-01 | 6,44E-01 | Mob1b    | 1,04 | No  |
| ENSMUSG00000006269 | -1,77E+00 | -2,8319149   | 2,19E+00 | 1,39E-01 | 4,71E-01 | Atp6v1b1 | 0,29 | No  |
| ENSMUSG00000006273 | 1,12E-02  | 9,122585289  | 3,92E-02 | 8,43E-01 | 9,85E-01 | Atp6v1b2 | 1,01 | No  |
| ENSMUSG00000006276 | -4,08E-02 | 6,289999856  | 4,10E-01 | 5,22E-01 | 8,00E-01 | Eps15l1  | 0,97 | No  |
| ENSMUSG00000006281 | 1,73E-01  | 8,249236114  | 8,92E+00 | 2,82E-03 | 3,66E-02 | Tep1     | 1,13 | Yes |
| ENSMUSG00000006288 | -1,27E-01 | 4,278325559  | 2,33E+00 | 1,27E-01 | 4,47E-01 | Ttc5     | 0,92 | No  |
| ENSMUSG00000006289 | 1,40E-01  | 3,756646002  | 2,25E+00 | 1,33E-01 | 4,60E-01 | Osgep    | 1,10 | No  |
| ENSMUSG00000006299 | -8,36E-02 | 6,690798724  | 1,83E+00 | 1,76E-01 | 5,35E-01 | Aamp     | 0,94 | No  |
| ENSMUSG00000006301 | 9,77E-02  | 6,588585634  | 2,47E+00 | 1,16E-01 | 4,21E-01 | Tmbim1   | 1,07 | No  |
| ENSMUSG00000006304 | 1,58E-03  | 8,794177263  | 7,67E-04 | 9,78E-01 | 1,00E+00 | Arcp2    | 1,00 | No  |
| ENSMUSG00000006307 | -1,02E-01 | 6,655303821  | 2,73E+00 | 9,82E-02 | 3,91E-01 | Kmt2b    | 0,93 | No  |
| ENSMUSG00000006310 | 7,84E-02  | -0,755540487 | 4,22E-02 | 8,37E-01 | 9,81E-01 | Zbtb32   | 1,06 | No  |
| ENSMUSG00000006311 | 1,84E+00  | -3,033649193 | 1,33E+00 | 2,49E-01 | 5,50E-01 | Etv2     | 3,58 | No  |
| ENSMUSG00000006313 | -5,59E-01 | -0,48501344  | 2,16E+00 | 1,42E-01 | 4,76E-01 | Upk1a    | 0,68 | No  |
| ENSMUSG00000006315 | 1,18E-01  | 4,320176417  | 1,99E+00 | 1,58E-01 | 5,05E-01 | Tmem147  | 1,09 | No  |
| ENSMUSG00000006333 | -2,38E-01 | 8,346913097  | 1,71E+01 | 3,57E-05 | 1,02E-03 | Rps9     | 0,85 | Yes |
| ENSMUSG00000006335 | -5,92E-03 | 3,918112579  | 4,25E-03 | 9,48E-01 | 1,00E+00 | Tfpt     | 1,00 | No  |
| ENSMUSG00000006342 | 2,53E-01  | -0,711738635 | 4,01E-01 | 5,27E-01 | 8,03E-01 | Susd2    | 1,19 | No  |
| ENSMUSG00000006344 | 2,05E-01  | 1,889223942  | 1,61E+00 | 2,04E-01 | 5,50E-01 | Ggt5     | 1,15 | No  |
| ENSMUSG00000006345 | -7,22E-01 | -2,226289424 | 8,87E-01 | 3,46E-01 | 6,47E-01 | Ggt1     | 0,61 | No  |
| ENSMUSG00000006356 | 1,36E-02  | 1,222021706  | 5,13E-03 | 9,43E-01 | 1,00E+00 | Crip2    | 1,01 | No  |
| ENSMUSG00000006360 | -1,67E-01 | 6,758854512  | 7,35E+00 | 6,70E-03 | 6,96E-02 | Crip1    | 0,89 | No  |
| ENSMUSG00000006362 | 6,59E-02  | 7,35387336   | 1,23E+00 | 2,67E-01 | 5,64E-01 | Cbfa2t3  | 1,05 | No  |
| ENSMUSG00000006369 | -3,23E+00 | -2,832003132 | 4,38E+00 | 3,64E-02 | 2,27E-01 | Fbln1    | 0,11 | No  |
| ENSMUSG00000006378 | 1,24E-01  | 3,598645153  | 1,61E+00 | 2,05E-01 | 5,50E-01 | Gcat     | 1,09 | No  |
| ENSMUSG00000006386 | 7,04E-01  | -2,401368935 | 7,19E-01 | 3,96E-01 | 6,97E-01 | Tek      | 1,63 | No  |
| ENSMUSG00000006389 | -4,13E-02 | -3,033659495 | 7,08E-04 | 9,79E-01 | 1,00E+00 | Mpl      | 0,97 | No  |
| ENSMUSG00000006390 | 1,21E-01  | 6,973511862  | 3,93E+00 | 4,74E-02 | 2,61E-01 | Elovl1   | 1,09 | No  |
| ENSMUSG00000006392 | -2,03E-02 | 5,326106688  | 8,32E-02 | 7,73E-01 | 9,44E-01 | Med8     | 0,99 | No  |
| ENSMUSG00000006395 | -1,72E-01 | 3,773673578  | 3,47E+00 | 6,24E-02 | 3,11E-01 | Hyi      | 0,89 | No  |

|                    |           |              |          |          |          |               |      |     |
|--------------------|-----------|--------------|----------|----------|----------|---------------|------|-----|
| ENSMUSG00000006398 | 1,44E-01  | 4,610899953  | 3,30E+00 | 6,91E-02 | 3,31E-01 | Cdc20         | 1,10 | No  |
| ENSMUSG00000006403 | -9,73E-01 | -1,289343699 | 3,76E+00 | 5,26E-02 | 2,79E-01 | Adamts4       | 0,51 | No  |
| ENSMUSG00000006411 | -1,68E-02 | 2,810460426  | 1,97E-02 | 8,88E-01 | 1,00E+00 | Nectin4       | 0,99 | No  |
| ENSMUSG00000006412 | 4,16E-02  | 4,505809001  | 2,68E-01 | 6,05E-01 | 8,49E-01 | Pfdn2         | 1,03 | No  |
| ENSMUSG00000006418 | -2,17E-01 | 6,929130631  | 1,27E+01 | 3,60E-04 | 7,03E-03 | Rnf114        | 0,86 | Yes |
| ENSMUSG00000006435 | -5,38E-01 | 2,784772841  | 2,14E+01 | 3,66E-06 | 1,39E-04 | Neurl1a       | 0,69 | Yes |
| ENSMUSG00000006442 | 2,09E-01  | 5,012395862  | 7,92E+00 | 4,89E-03 | 5,51E-02 | Srm           | 1,16 | No  |
| ENSMUSG00000006445 | 1,87E-01  | 2,634459967  | 2,20E+00 | 1,38E-01 | 4,68E-01 | Epha2         | 1,14 | No  |
| ENSMUSG00000006456 | 5,74E-02  | 5,539783439  | 7,00E-01 | 4,03E-01 | 7,01E-01 | Rbm14         | 1,04 | No  |
| ENSMUSG00000006457 | -5,74E-01 | -2,711657388 | 2,58E-01 | 6,12E-01 | 8,52E-01 | Actn3         | 0,67 | No  |
| ENSMUSG00000006462 | -2,96E-01 | -0,57416712  | 5,10E-01 | 4,75E-01 | 7,63E-01 | A530013C23Rik | 0,81 | No  |
| ENSMUSG00000006463 | 3,44E-03  | 3,222483242  | 1,07E-03 | 9,74E-01 | 1,00E+00 | Zdhhc24       | 1,00 | No  |
| ENSMUSG00000006464 | 4,32E-02  | 0,053673818  | 2,10E-02 | 8,85E-01 | 1,00E+00 | Bbs1          | 1,03 | No  |
| ENSMUSG00000006469 | -2,63E-02 | -3,033653157 | 2,33E-04 | 9,88E-01 | 1,00E+00 | Slc34a3       | 0,98 | No  |
| ENSMUSG00000006471 | -5,71E-02 | 5,528319851  | 6,91E-01 | 4,06E-01 | 7,02E-01 | Ndor1         | 0,96 | No  |
| ENSMUSG00000006476 | 4,32E-02  | 5,132958032  | 3,54E-01 | 5,52E-01 | 8,18E-01 | Nsmf          | 1,03 | No  |
| ENSMUSG00000006494 | 2,94E-01  | 5,682300391  | 1,87E+01 | 1,53E-05 | 4,88E-04 | Pdk1          | 1,23 | Yes |
| ENSMUSG00000006498 | 1,08E-01  | 7,576581678  | 3,36E+00 | 6,68E-02 | 3,25E-01 | Ptbp1         | 1,08 | No  |
| ENSMUSG00000006517 | 2,32E-01  | 6,330841715  | 1,33E+01 | 2,71E-04 | 5,59E-03 | Mvd           | 1,17 | Yes |
| ENSMUSG00000006519 | 7,55E-02  | 8,143411283  | 1,69E+00 | 1,93E-01 | 5,50E-01 | Cyba          | 1,05 | No  |
| ENSMUSG00000006526 | -1,44E-01 | 4,13137515   | 2,82E+00 | 9,34E-02 | 3,83E-01 | Tmem110       | 0,90 | No  |
| ENSMUSG00000006527 | -1,17E-01 | 5,256246544  | 2,67E+00 | 1,02E-01 | 3,95E-01 | Sfmbt1        | 0,92 | No  |
| ENSMUSG00000006529 | 7,67E-01  | -2,963261668 | 3,24E-01 | 5,69E-01 | 8,30E-01 | Itih1         | 1,70 | No  |
| ENSMUSG00000006538 | -4,28E-01 | -1,896054193 | 5,31E-01 | 4,66E-01 | 7,54E-01 | lhh           | 0,74 | No  |
| ENSMUSG00000006542 | 1,46E+00  | -1,998016669 | 4,81E+00 | 2,83E-02 | 1,91E-01 | Prkag3        | 2,75 | No  |
| ENSMUSG00000006567 | 8,34E-01  | -1,548318033 | 2,17E+00 | 1,41E-01 | 4,75E-01 | Atp7b         | 1,78 | No  |
| ENSMUSG00000006575 | 1,33E-01  | 1,119788473  | 4,23E-01 | 5,16E-01 | 7,97E-01 | Rundc3a       | 1,10 | No  |
| ENSMUSG00000006576 | -2,46E-01 | 2,905910018  | 4,86E+00 | 2,75E-02 | 1,87E-01 | Slc4a3        | 0,84 | No  |
| ENSMUSG00000006585 | 3,48E-01  | 5,100482327  | 2,27E+01 | 1,91E-06 | 7,77E-05 | Cdt1          | 1,27 | Yes |
| ENSMUSG00000006586 | -1,90E+00 | -2,963209436 | 1,44E+00 | 2,31E-01 | 5,50E-01 | Runx1t1       | 0,27 | No  |
| ENSMUSG00000006587 | 2,74E-01  | 0,477272039  | 1,21E+00 | 2,72E-01 | 5,68E-01 | Snai3         | 1,21 | No  |
| ENSMUSG00000006589 | 8,60E-02  | 6,177978978  | 1,78E+00 | 1,82E-01 | 5,45E-01 | Aprt          | 1,06 | No  |

|                    |           |              |          |          |          |               |      |     |
|--------------------|-----------|--------------|----------|----------|----------|---------------|------|-----|
| ENSMUSG00000006599 | 5,65E-02  | 6,191641446  | 7,71E-01 | 3,80E-01 | 6,81E-01 | Gtf2h1        | 1,04 | No  |
| ENSMUSG00000006611 | 1,12E-01  | 4,813594889  | 2,14E+00 | 1,44E-01 | 4,79E-01 | Hfe           | 1,08 | No  |
| ENSMUSG00000006638 | -4,17E-03 | 3,057557279  | 1,41E-03 | 9,70E-01 | 1,00E+00 | Abhd1         | 1,00 | No  |
| ENSMUSG00000006641 | 4,31E-01  | 3,137880436  | 1,56E+01 | 7,71E-05 | 1,95E-03 | Slc5a6        | 1,35 | Yes |
| ENSMUSG00000006642 | 1,87E+00  | -3,107639691 | 1,38E+00 | 2,40E-01 | 5,50E-01 | Tcf23         | 3,67 | No  |
| ENSMUSG00000006649 | -1,48E-01 | 5,797016904  | 4,90E+00 | 2,69E-02 | 1,84E-01 | Nphs1         | 0,90 | No  |
| ENSMUSG00000006651 | 3,21E-02  | 0,731840983  | 1,88E-02 | 8,91E-01 | 1,00E+00 | Aplp1         | 1,02 | No  |
| ENSMUSG00000006673 | 5,07E-02  | 6,808927536  | 6,80E-01 | 4,10E-01 | 7,06E-01 | Qrich1        | 1,04 | No  |
| ENSMUSG00000006675 | -6,29E-01 | 0,136459207  | 4,74E+00 | 2,95E-02 | 1,96E-01 | P4htm         | 0,65 | No  |
| ENSMUSG00000006676 | 5,28E-02  | 7,55683307   | 7,97E-01 | 3,72E-01 | 6,73E-01 | Usp19         | 1,04 | No  |
| ENSMUSG00000006699 | -2,74E-02 | 9,197680108  | 2,33E-01 | 6,29E-01 | 8,62E-01 | Cdc42         | 0,98 | No  |
| ENSMUSG00000006705 | 7,51E-02  | 5,097038366  | 1,07E+00 | 3,01E-01 | 5,97E-01 | Pknox1        | 1,05 | No  |
| ENSMUSG00000006711 | -1,87E+00 | -3,107637761 | 1,39E+00 | 2,38E-01 | 5,50E-01 | D130043K22Rik | 0,27 | No  |
| ENSMUSG00000006715 | 1,65E-01  | 4,606156149  | 4,40E+00 | 3,59E-02 | 2,25E-01 | Gmnn          | 1,12 | No  |
| ENSMUSG00000006717 | 6,41E-02  | 4,248771991  | 5,72E-01 | 4,50E-01 | 7,40E-01 | Acot13        | 1,05 | No  |
| ENSMUSG00000006720 | -8,40E-02 | -1,896143632 | 1,47E-02 | 9,03E-01 | 1,00E+00 | Zfp184        | 0,94 | No  |
| ENSMUSG00000006724 | 7,02E-01  | -1,683099665 | 1,33E+00 | 2,49E-01 | 5,50E-01 | Cyp27b1       | 1,63 | No  |
| ENSMUSG00000006728 | 1,22E-01  | 7,031689065  | 4,05E+00 | 4,41E-02 | 2,50E-01 | Cdk4          | 1,09 | No  |
| ENSMUSG00000006731 | -1,62E-01 | 7,361437161  | 7,40E+00 | 6,53E-03 | 6,82E-02 | B4galnt1      | 0,89 | No  |
| ENSMUSG00000006732 | 3,12E-01  | 3,165377409  | 8,24E+00 | 4,09E-03 | 4,81E-02 | Mettl1        | 1,24 | Yes |
| ENSMUSG00000006736 | -4,45E-02 | 5,969239691  | 4,60E-01 | 4,98E-01 | 7,83E-01 | Tspan31       | 0,97 | No  |
| ENSMUSG00000006740 | 4,00E-02  | 7,378575087  | 4,50E-01 | 5,02E-01 | 7,87E-01 | Kif5b         | 1,03 | No  |
| ENSMUSG00000006763 | 3,84E-03  | 3,247085935  | 1,30E-03 | 9,71E-01 | 1,00E+00 | Saal1         | 1,00 | No  |
| ENSMUSG00000006782 | 9,30E-03  | 5,667323459  | 1,88E-02 | 8,91E-01 | 1,00E+00 | Cnp           | 1,01 | No  |
| ENSMUSG00000006784 | -5,96E-01 | 0,934816116  | 7,97E+00 | 4,76E-03 | 5,39E-02 | Ttc25         | 0,66 | No  |
| ENSMUSG00000006800 | 2,95E-01  | 7,860620756  | 2,54E+01 | 4,75E-07 | 2,27E-05 | Sulf2         | 1,23 | Yes |
| ENSMUSG00000006818 | -8,54E-02 | 6,733944438  | 1,91E+00 | 1,67E-01 | 5,20E-01 | Sod2          | 0,94 | No  |
| ENSMUSG00000006850 | -1,74E-02 | 3,049765649  | 2,50E-02 | 8,74E-01 | 1,00E+00 | Tmco6         | 0,99 | No  |
| ENSMUSG00000006906 | 8,42E-02  | 4,468885365  | 1,07E+00 | 3,00E-01 | 5,97E-01 | Stampb        | 1,06 | No  |
| ENSMUSG00000006920 | -5,70E-02 | 5,95151037   | 7,60E-01 | 3,83E-01 | 6,85E-01 | Ezh1          | 0,96 | No  |
| ENSMUSG00000006930 | -5,01E-01 | 0,858705135  | 5,35E+00 | 2,07E-02 | 1,55E-01 | Hap1          | 0,71 | No  |
| ENSMUSG00000006931 | 1,47E-01  | -1,683182228 | 7,02E-02 | 7,91E-01 | 9,55E-01 | P3h4          | 1,11 | No  |

|                    |           |              |           |          |          |         |      |     |
|--------------------|-----------|--------------|-----------|----------|----------|---------|------|-----|
| ENSMUSG00000006932 | 1,09E-01  | 8,291952975  | 3,55E+00  | 5,96E-02 | 3,02E-01 | Ctnnb1  | 1,08 | No  |
| ENSMUSG00000006941 | 7,43E-02  | 4,932964526  | 9,82E-01  | 3,22E-01 | 6,22E-01 | Eif1b   | 1,05 | No  |
| ENSMUSG00000006948 | 4,83E-01  | -2,070069903 | 3,16E-01  | 5,74E-01 | 8,33E-01 | Klk4    | 1,40 | No  |
| ENSMUSG00000006998 | 1,85E-02  | 6,965331708  | 9,27E-02  | 7,61E-01 | 9,37E-01 | Psmc2   | 1,01 | No  |
| ENSMUSG00000007021 | -9,31E-01 | -1,051641759 | 4,87E+00  | 2,73E-02 | 1,86E-01 | Syngn3  | 0,52 | No  |
| ENSMUSG00000007029 | -3,70E-02 | 6,260425194  | 3,35E-01  | 5,63E-01 | 8,26E-01 | Vars    | 0,97 | No  |
| ENSMUSG00000007030 | 1,32E+00  | -2,088800304 | 2,43E+00  | 1,19E-01 | 4,29E-01 | Vwa7    | 2,50 | No  |
| ENSMUSG00000007033 | 6,86E-02  | -0,215920699 | 4,41E-02  | 8,34E-01 | 9,79E-01 | Hspa1l  | 1,05 | No  |
| ENSMUSG00000007034 | -3,65E-01 | -2,49761737  | 1,68E-01  | 6,82E-01 | 8,94E-01 | Slc44a4 | 0,78 | No  |
| ENSMUSG00000007035 | 4,35E-01  | 0,2214859    | 2,68E+00  | 1,02E-01 | 3,94E-01 | Msh5    | 1,35 | No  |
| ENSMUSG00000007036 | 2,62E-02  | 4,736648566  | 1,15E-01  | 7,35E-01 | 9,24E-01 | Abhd16a | 1,02 | No  |
| ENSMUSG00000007038 | 1,19E-02  | 6,907422704  | 3,81E-02  | 8,45E-01 | 9,86E-01 | Neu1    | 1,01 | No  |
| ENSMUSG00000007039 | -2,69E-02 | 0,750600547  | 1,46E-02  | 9,04E-01 | 1,00E+00 | Ddah2   | 0,98 | No  |
| ENSMUSG00000007041 | 2,58E-02  | 8,374904609  | 2,00E-01  | 6,54E-01 | 8,79E-01 | Clic1   | 1,02 | No  |
| ENSMUSG00000007050 | 6,26E-02  | 4,165567844  | 5,27E-01  | 4,68E-01 | 7,56E-01 | Lsm2    | 1,04 | No  |
| ENSMUSG00000007080 | 1,89E-01  | 5,189663284  | 6,88E+00  | 8,74E-03 | 8,46E-02 | Pole    | 1,14 | No  |
| ENSMUSG00000007097 | 1,05E-02  | -3,070147673 | -1,08E-11 | 1,00E+00 | 1,00E+00 | Atp1a2  | 1,01 | No  |
| ENSMUSG00000007122 | -2,44E-02 | -1,146088775 | 2,83E-03  | 9,58E-01 | 1,00E+00 | Casq1   | 0,98 | No  |
| ENSMUSG00000007207 | -4,62E-01 | 0,095846954  | 2,59E+00  | 1,08E-01 | 4,02E-01 | Stx1a   | 0,73 | No  |
| ENSMUSG00000007209 | 1,81E+00  | -3,10765737  | 1,28E+00  | 2,58E-01 | 5,50E-01 | Ceacam9 | 3,49 | No  |
| ENSMUSG00000007216 | -2,64E-03 | 2,274106866  | 3,82E-04  | 9,84E-01 | 1,00E+00 | Zfp775  | 1,00 | No  |
| ENSMUSG00000007279 | -1,36E+00 | -2,896122487 | 1,16E+00  | 2,81E-01 | 5,78E-01 | Scube2  | 0,39 | No  |
| ENSMUSG00000007338 | 2,34E-01  | 4,491331165  | 8,52E+00  | 3,52E-03 | 4,31E-02 | Mrpl49  | 1,18 | Yes |
| ENSMUSG00000007379 | 5,71E-01  | 2,723965254  | 2,18E+01  | 3,06E-06 | 1,18E-04 | Dennd2c | 1,49 | Yes |
| ENSMUSG00000007411 | 8,83E-02  | 5,801907769  | 1,74E+00  | 1,87E-01 | 5,50E-01 | Mark3   | 1,06 | No  |
| ENSMUSG00000007415 | 4,29E-02  | 5,894972805  | 4,21E-01  | 5,16E-01 | 7,97E-01 | Gatad1  | 1,03 | No  |
| ENSMUSG00000007440 | 4,82E-03  | -3,17446542  | 1,60E-11  | 1,00E+00 | 1,00E+00 | Pcdha11 | 1,00 | No  |
| ENSMUSG00000007458 | -7,68E-03 | 8,453351771  | 1,78E-02  | 8,94E-01 | 1,00E+00 | M6pr    | 0,99 | No  |
| ENSMUSG00000007476 | 1,60E-01  | 3,456288875  | 2,57E+00  | 1,09E-01 | 4,05E-01 | Lrrc8a  | 1,12 | No  |
| ENSMUSG00000007480 | -3,83E-02 | -3,107651936 | -7,91E-11 | 1,00E+00 | 1,00E+00 | Mc5r    | 0,97 | No  |
| ENSMUSG00000007564 | -2,34E-03 | 7,425999334  | 1,55E-03  | 9,69E-01 | 1,00E+00 | Ppp2r1a | 1,00 | No  |
| ENSMUSG00000007570 | 5,11E-02  | 4,021660495  | 3,31E-01  | 5,65E-01 | 8,28E-01 | Fance   | 1,04 | No  |

|                    |           |              |          |          |          |               |      |     |
|--------------------|-----------|--------------|----------|----------|----------|---------------|------|-----|
| ENSMUSG00000007589 | 3,76E-02  | 4,371082953  | 2,06E-01 | 6,50E-01 | 8,76E-01 | Tinf2         | 1,03 | No  |
| ENSMUSG00000007591 | 7,17E-02  | -0,424907965 | 4,75E-02 | 8,27E-01 | 9,76E-01 | Tssk4         | 1,05 | No  |
| ENSMUSG00000007594 | 3,22E-01  | -2,033535928 | 1,91E-01 | 6,62E-01 | 8,83E-01 | Hapln4        | 1,25 | No  |
| ENSMUSG00000007603 | 5,73E-02  | 5,009654264  | 5,94E-01 | 4,41E-01 | 7,33E-01 | Dus3l         | 1,04 | No  |
| ENSMUSG00000007610 | 7,93E-02  | 4,203372839  | 8,81E-01 | 3,48E-01 | 6,49E-01 | Gtpbp3        | 1,06 | No  |
| ENSMUSG00000007613 | 3,14E-01  | 8,246595806  | 2,94E+01 | 5,80E-08 | 3,40E-06 | Tgfbr1        | 1,24 | Yes |
| ENSMUSG00000007617 | 1,72E-01  | 6,33009917   | 7,28E+00 | 6,97E-03 | 7,16E-02 | Homer1        | 1,13 | No  |
| ENSMUSG00000007646 | -3,90E-02 | 1,136106767  | 3,78E-02 | 8,46E-01 | 9,87E-01 | Rad51c        | 0,97 | No  |
| ENSMUSG00000007655 | 9,18E-01  | 6,741351356  | 2,14E+02 | 1,96E-48 | 3,91E-45 | Cav1          | 1,89 | Yes |
| ENSMUSG00000007656 | -1,40E-01 | 5,981973514  | 4,55E+00 | 3,29E-02 | 2,12E-01 | Arpp19        | 0,91 | No  |
| ENSMUSG00000007659 | 1,76E-01  | 6,819385955  | 8,18E+00 | 4,24E-03 | 4,94E-02 | Bcl2l1        | 1,13 | Yes |
| ENSMUSG00000007670 | 8,15E-02  | 6,814759377  | 1,77E+00 | 1,84E-01 | 5,47E-01 | Khsrp         | 1,06 | No  |
| ENSMUSG00000007682 | -5,77E-01 | 2,008840449  | 1,50E+01 | 1,05E-04 | 2,53E-03 | Dio2          | 0,67 | Yes |
| ENSMUSG00000007721 | -4,44E-02 | 5,457897251  | 4,06E-01 | 5,24E-01 | 8,01E-01 | Ccdc124       | 0,97 | No  |
| ENSMUSG00000007739 | -1,01E-01 | 7,290226181  | 2,88E+00 | 8,97E-02 | 3,80E-01 | Cct4          | 0,93 | No  |
| ENSMUSG00000007777 | 5,91E-02  | 3,498644877  | 3,58E-01 | 5,50E-01 | 8,17E-01 | 0610009B22Rik | 1,04 | No  |
| ENSMUSG00000007783 | -3,55E-01 | 2,213761563  | 6,57E+00 | 1,04E-02 | 9,58E-02 | Cpt1c         | 0,78 | No  |
| ENSMUSG00000007812 | 1,07E-01  | 5,214227826  | 2,26E+00 | 1,33E-01 | 4,58E-01 | Zfp655        | 1,08 | No  |
| ENSMUSG00000007815 | -4,32E-03 | 8,099842168  | 5,54E-03 | 9,41E-01 | 1,00E+00 | Rhoa          | 1,00 | No  |
| ENSMUSG00000007817 | 1,32E-01  | 8,553634179  | 5,28E+00 | 2,16E-02 | 1,58E-01 | Zmiz1         | 1,10 | No  |
| ENSMUSG00000007827 | 1,81E-01  | 3,003920984  | 2,57E+00 | 1,09E-01 | 4,04E-01 | Ankrd26       | 1,13 | No  |
| ENSMUSG00000007833 | 8,62E-02  | 5,683824293  | 1,63E+00 | 2,02E-01 | 5,50E-01 | Aldh16a1      | 1,06 | No  |
| ENSMUSG00000007836 | 8,67E-02  | 7,651076046  | 2,16E+00 | 1,41E-01 | 4,75E-01 | Hnrnpa0       | 1,06 | No  |
| ENSMUSG00000007837 | -9,75E-02 | 4,317691977  | 1,37E+00 | 2,41E-01 | 5,50E-01 | Prrg2         | 0,93 | No  |
| ENSMUSG00000007850 | -1,49E-02 | 8,133023254  | 6,58E-02 | 7,98E-01 | 9,58E-01 | Hnrnph1       | 0,99 | No  |
| ENSMUSG00000007867 | -2,56E-01 | 1,66453294   | 2,29E+00 | 1,30E-01 | 4,52E-01 | lft43         | 0,84 | No  |
| ENSMUSG00000007872 | -9,41E-01 | 1,576112094  | 2,63E+01 | 2,91E-07 | 1,46E-05 | Id3           | 0,52 | Yes |
| ENSMUSG00000007877 | -8,78E-02 | -2,963255397 | 3,51E-03 | 9,53E-01 | 1,00E+00 | Tcap          | 0,94 | No  |
| ENSMUSG00000007880 | 9,07E-02  | 7,54787532   | 2,36E+00 | 1,25E-01 | 4,42E-01 | Arid1a        | 1,06 | No  |
| ENSMUSG00000007888 | -5,84E-01 | -2,770605859 | 2,68E-01 | 6,05E-01 | 8,49E-01 | Crlf1         | 0,67 | No  |
| ENSMUSG00000007891 | 3,54E-02  | 11,7463612   | 4,02E-01 | 5,26E-01 | 8,03E-01 | Ctsd          | 1,02 | No  |
| ENSMUSG00000007892 | -1,05E-01 | 8,558232219  | 3,34E+00 | 6,75E-02 | 3,27E-01 | Rplp1         | 0,93 | No  |



|                    |           |              |          |          |          |               |      |     |
|--------------------|-----------|--------------|----------|----------|----------|---------------|------|-----|
| ENSMUSG00000007944 | -8,96E-02 | -0,937704512 | 4,92E-02 | 8,24E-01 | 9,74E-01 | Ttc9b         | 0,94 | No  |
| ENSMUSG00000007946 | -3,45E-01 | -1,333133814 | 4,57E-01 | 4,99E-01 | 7,84E-01 | Phox2a        | 0,79 | No  |
| ENSMUSG00000007950 | 2,98E-03  | 3,335784337  | 8,11E-04 | 9,77E-01 | 1,00E+00 | Abhd8         | 1,00 | No  |
| ENSMUSG00000007987 | 1,16E-01  | 4,097725208  | 1,78E+00 | 1,82E-01 | 5,44E-01 | lft22         | 1,08 | No  |
| ENSMUSG00000007989 | -4,52E+00 | -2,600647612 | 1,15E+01 | 6,95E-04 | 1,20E-02 | Fzd3          | 0,04 | Yes |
| ENSMUSG00000008028 | 1,34E+00  | -2,165863166 | 2,86E+00 | 9,09E-02 | 3,82E-01 | 1700008O03Rik | 2,53 | No  |
| ENSMUSG00000008036 | 7,93E-02  | 6,950171655  | 1,69E+00 | 1,93E-01 | 5,50E-01 | Ap2s1         | 1,06 | No  |
| ENSMUSG00000008090 | -2,09E-02 | 0,358705675  | 6,22E-03 | 9,37E-01 | 1,00E+00 | Fgfr1         | 0,99 | No  |
| ENSMUSG00000008129 | 2,19E-02  | -0,816520394 | 2,92E-03 | 9,57E-01 | 1,00E+00 | 4930432K21Rik | 1,02 | No  |
| ENSMUSG00000008136 | 6,30E-01  | -1,896134119 | 8,07E-01 | 3,69E-01 | 6,70E-01 | Fhl2          | 1,55 | No  |
| ENSMUSG00000008140 | 9,59E-02  | 6,16108731   | 2,19E+00 | 1,39E-01 | 4,70E-01 | Emc10         | 1,07 | No  |
| ENSMUSG00000008153 | -2,72E-01 | -0,509863221 | 6,45E-01 | 4,22E-01 | 7,17E-01 | Clstn3        | 0,83 | No  |
| ENSMUSG00000008167 | -2,66E-02 | 3,439582821  | 7,03E-02 | 7,91E-01 | 9,55E-01 | Fbxw9         | 0,98 | No  |
| ENSMUSG00000008193 | -8,35E-01 | 4,574631227  | 1,11E+02 | 5,05E-26 | 1,89E-23 | Spib          | 0,56 | Yes |
| ENSMUSG00000008200 | 2,10E-02  | 6,597684867  | 1,14E-01 | 7,36E-01 | 9,24E-01 | Fnbp4         | 1,01 | No  |
| ENSMUSG00000008206 | -2,74E-02 | -0,600587719 | 5,50E-03 | 9,41E-01 | 1,00E+00 | Cers4         | 0,98 | No  |
| ENSMUSG00000008226 | 3,55E-01  | 3,684998472  | 1,43E+01 | 1,55E-04 | 3,50E-03 | Scrn3         | 1,28 | Yes |
| ENSMUSG00000008301 | 3,35E-02  | 4,778822497  | 1,91E-01 | 6,62E-01 | 8,83E-01 | Phax          | 1,02 | No  |
| ENSMUSG00000008305 | 1,57E-01  | 3,684228259  | 2,68E+00 | 1,01E-01 | 3,94E-01 | Tle1          | 1,12 | No  |
| ENSMUSG00000008307 | -4,19E-01 | 3,086812546  | 1,39E+01 | 1,96E-04 | 4,27E-03 | 1700109H08Rik | 0,75 | Yes |
| ENSMUSG00000008318 | -1,50E-01 | 6,308551534  | 5,59E+00 | 1,81E-02 | 1,41E-01 | Relt          | 0,90 | No  |
| ENSMUSG00000008333 | -9,36E-02 | 4,804121204  | 1,50E+00 | 2,21E-01 | 5,50E-01 | Snrpb2        | 0,94 | No  |
| ENSMUSG00000008348 | -1,45E-01 | 11,13958142  | 6,73E+00 | 9,49E-03 | 8,98E-02 | Ubc           | 0,90 | No  |
| ENSMUSG00000008373 | 4,31E-02  | 6,146488734  | 4,46E-01 | 5,04E-01 | 7,89E-01 | Prpf31        | 1,03 | No  |
| ENSMUSG00000008384 | -1,63E-02 | 4,52070506   | 4,17E-02 | 8,38E-01 | 9,82E-01 | Sertad1       | 0,99 | No  |
| ENSMUSG00000008393 | 1,32E-01  | 6,309543299  | 4,25E+00 | 3,92E-02 | 2,35E-01 | Carhsp1       | 1,10 | No  |
| ENSMUSG00000008398 | -3,17E-02 | 5,793302226  | 2,26E-01 | 6,34E-01 | 8,66E-01 | Elk3          | 0,98 | No  |
| ENSMUSG00000008429 | -1,92E-02 | 6,03228496   | 8,62E-02 | 7,69E-01 | 9,42E-01 | Herpud2       | 0,99 | No  |
| ENSMUSG00000008435 | -1,17E-02 | 4,337233866  | 2,03E-02 | 8,87E-01 | 1,00E+00 | Rdh13         | 0,99 | No  |
| ENSMUSG00000008438 | 1,60E-01  | -2,107648518 | 3,84E-02 | 8,45E-01 | 9,86E-01 | Adam21        | 1,12 | No  |
| ENSMUSG00000008450 | -4,06E-02 | 3,487055109  | 1,68E-01 | 6,82E-01 | 8,94E-01 | Nutf2         | 0,97 | No  |
| ENSMUSG00000008475 | -3,70E-02 | 9,216324331  | 4,25E-01 | 5,14E-01 | 7,96E-01 | Arpc5         | 0,97 | No  |

|                    |           |              |           |          |          |          |      |     |
|--------------------|-----------|--------------|-----------|----------|----------|----------|------|-----|
| ENSMUSG00000008482 | -2,88E-02 | -2,896100165 | 4,24E-04  | 9,84E-01 | 1,00E+00 | Rnf151   | 0,98 | No  |
| ENSMUSG00000008496 | -6,85E-02 | 0,873195461  | 9,95E-02  | 7,52E-01 | 9,32E-01 | Pou2f2   | 0,95 | No  |
| ENSMUSG00000008540 | 2,03E-01  | 5,744281442  | 9,03E+00  | 2,66E-03 | 3,49E-02 | Mgst1    | 1,15 | Yes |
| ENSMUSG00000008575 | 1,12E+00  | -2,497601997 | 1,20E+00  | 2,74E-01 | 5,71E-01 | Nfib     | 2,18 | No  |
| ENSMUSG00000008590 | 2,36E+00  | -2,600762357 | 4,75E+00  | 2,92E-02 | 1,95E-01 | Htr3b    | 5,14 | No  |
| ENSMUSG00000008601 | -1,29E-01 | -0,963181358 | 9,55E-02  | 7,57E-01 | 9,35E-01 | Rab25    | 0,91 | No  |
| ENSMUSG00000008604 | 7,73E-02  | 5,740449627  | 1,32E+00  | 2,50E-01 | 5,50E-01 | Ubqln4   | 1,06 | No  |
| ENSMUSG00000008668 | -2,28E-01 | 6,639108003  | 1,36E+01  | 2,28E-04 | 4,85E-03 | Rps18    | 0,85 | Yes |
| ENSMUSG00000008683 | -2,59E-01 | 5,342025189  | 1,35E+01  | 2,34E-04 | 4,96E-03 | Rps15a   | 0,84 | Yes |
| ENSMUSG00000008690 | 5,26E-02  | 5,624658517  | 5,96E-01  | 4,40E-01 | 7,32E-01 | Ncaph2   | 1,04 | No  |
| ENSMUSG00000008730 | 1,03E-01  | 8,290836041  | 3,19E+00  | 7,42E-02 | 3,46E-01 | Hipk1    | 1,07 | No  |
| ENSMUSG00000008734 | -1,21E-01 | 0,906332072  | 3,13E-01  | 5,76E-01 | 8,34E-01 | Gprc5b   | 0,92 | No  |
| ENSMUSG00000008763 | 1,64E-01  | 6,270320548  | 6,54E+00  | 1,06E-02 | 9,72E-02 | Man1a2   | 1,12 | No  |
| ENSMUSG00000008822 | 3,14E-01  | 1,85390692   | 3,94E+00  | 4,71E-02 | 2,60E-01 | Acyp1    | 1,24 | No  |
| ENSMUSG00000008843 | -8,98E-01 | -2,770592541 | 7,00E-01  | 4,03E-01 | 7,01E-01 | Cldn13   | 0,54 | No  |
| ENSMUSG00000008845 | 5,08E-01  | 2,781591705  | 1,70E+01  | 3,69E-05 | 1,05E-03 | Cd163    | 1,42 | Yes |
| ENSMUSG00000008855 | 1,80E-01  | 6,367922678  | 8,08E+00  | 4,49E-03 | 5,14E-02 | Hdac5    | 1,13 | No  |
| ENSMUSG00000008859 | -1,50E-01 | 5,570246609  | 4,83E+00  | 2,80E-02 | 1,89E-01 | Rala     | 0,90 | No  |
| ENSMUSG00000008892 | -1,20E-02 | 4,983654842  | 2,63E-02  | 8,71E-01 | 1,00E+00 | Vdac3    | 0,99 | No  |
| ENSMUSG00000008958 | -1,18E-01 | 4,622643606  | 2,25E+00  | 1,34E-01 | 4,60E-01 | Vps72    | 0,92 | No  |
| ENSMUSG00000008976 | 4,16E-02  | 6,116988129  | 4,14E-01  | 5,20E-01 | 7,99E-01 | Gabpa    | 1,03 | No  |
| ENSMUSG00000009013 | 1,01E-01  | 6,097325337  | 2,44E+00  | 1,18E-01 | 4,27E-01 | Dynll1   | 1,07 | No  |
| ENSMUSG00000009030 | -8,04E-03 | 5,518185823  | 1,35E-02  | 9,07E-01 | 1,00E+00 | Pdcl     | 0,99 | No  |
| ENSMUSG00000009035 | -1,99E-02 | 6,663406446  | 1,03E-01  | 7,49E-01 | 9,30E-01 | Tmem184b | 0,99 | No  |
| ENSMUSG00000009073 | 2,01E-02  | 6,444917328  | 1,01E-01  | 7,50E-01 | 9,31E-01 | Nf2      | 1,01 | No  |
| ENSMUSG00000009075 | 3,16E-02  | 1,130057507  | 2,54E-02  | 8,73E-01 | 1,00E+00 | Cabp7    | 1,02 | No  |
| ENSMUSG00000009076 | -1,72E-01 | 2,903703246  | 2,27E+00  | 1,32E-01 | 4,57E-01 | Zmat5    | 0,89 | No  |
| ENSMUSG00000009079 | -2,20E-02 | 7,006788398  | 1,31E-01  | 7,17E-01 | 9,13E-01 | Ewsr1    | 0,98 | No  |
| ENSMUSG00000009090 | 1,54E-01  | 7,603464273  | 6,77E+00  | 9,28E-03 | 8,83E-02 | Ap1b1    | 1,11 | No  |
| ENSMUSG00000009092 | 4,53E-01  | -0,257504437 | 1,54E+00  | 2,14E-01 | 5,50E-01 | Derl3    | 1,37 | No  |
| ENSMUSG00000009093 | 4,34E-01  | -2,711732088 | 1,47E-01  | 7,02E-01 | 9,05E-01 | Gstt4    | 1,35 | No  |
| ENSMUSG00000009097 | 9,01E-03  | -3,107646452 | -5,16E-10 | 1,00E+00 | 1,00E+00 | Tbx1     | 1,01 | No  |

|                    |           |              |          |          |          |               |      |     |
|--------------------|-----------|--------------|----------|----------|----------|---------------|------|-----|
| ENSMUSG00000009108 | -7,40E-01 | -1,079401812 | 2,97E+00 | 8,50E-02 | 3,74E-01 | Gnat2         | 0,60 | No  |
| ENSMUSG00000009112 | -6,32E-02 | 5,717870132  | 8,82E-01 | 3,48E-01 | 6,49E-01 | Bcl2l13       | 0,96 | No  |
| ENSMUSG00000009114 | -5,29E-01 | -1,755629771 | 8,38E-01 | 3,60E-01 | 6,61E-01 | 2610028H24Rik | 0,69 | No  |
| ENSMUSG00000009115 | 4,09E-01  | -2,963255991 | 8,45E-02 | 7,71E-01 | 9,43E-01 | Spatc1l       | 1,33 | No  |
| ENSMUSG00000009145 | -2,98E-02 | 2,214843649  | 4,67E-02 | 8,29E-01 | 9,76E-01 | Dqx1          | 0,98 | No  |
| ENSMUSG00000009185 | -8,14E-02 | -2,832040318 | 4,55E-03 | 9,46E-01 | 1,00E+00 | Ccl8          | 0,95 | No  |
| ENSMUSG00000009207 | 2,42E-01  | 4,614695747  | 9,36E+00 | 2,21E-03 | 3,03E-02 | Lnpk          | 1,18 | Yes |
| ENSMUSG00000009210 | 1,87E+00  | -3,107639691 | 1,38E+00 | 2,40E-01 | 5,50E-01 | Prr29         | 3,67 | No  |
| ENSMUSG00000009214 | 2,63E+00  | -2,963269893 | 2,67E+00 | 1,02E-01 | 3,94E-01 | Mymk          | 6,19 | No  |
| ENSMUSG00000009246 | -1,13E-01 | 0,372486477  | 1,70E-01 | 6,80E-01 | 8,93E-01 | Trpm5         | 0,92 | No  |
| ENSMUSG00000009248 | 7,13E-01  | -2,655138649 | 2,78E-01 | 5,98E-01 | 8,45E-01 | Ascl2         | 1,64 | No  |
| ENSMUSG00000009281 | -1,71E-01 | 1,986689669  | 1,35E+00 | 2,45E-01 | 5,50E-01 | Rarres2       | 0,89 | No  |
| ENSMUSG00000009291 | 1,25E-01  | 8,141728465  | 4,66E+00 | 3,08E-02 | 2,02E-01 | Pttg1ip       | 1,09 | No  |
| ENSMUSG00000009292 | -3,94E-01 | 2,283530334  | 8,16E+00 | 4,29E-03 | 4,99E-02 | Trpm2         | 0,76 | Yes |
| ENSMUSG00000009293 | -8,00E-02 | 6,181177201  | 1,56E+00 | 2,12E-01 | 5,50E-01 | Ube2g2        | 0,95 | No  |
| ENSMUSG00000009350 | 1,56E-01  | -1,785711804 | 5,82E-02 | 8,09E-01 | 9,65E-01 | Mpo           | 1,11 | No  |
| ENSMUSG00000009356 | 6,94E-01  | -2,963285211 | 2,59E-01 | 6,11E-01 | 8,52E-01 | Lpo           | 1,62 | No  |
| ENSMUSG00000009376 | -1,42E-01 | 6,176224033  | 4,89E+00 | 2,70E-02 | 1,84E-01 | Met           | 0,91 | No  |
| ENSMUSG00000009378 | 1,85E+00  | -3,107657832 | 1,35E+00 | 2,46E-01 | 5,50E-01 | Slc16a12      | 3,61 | No  |
| ENSMUSG00000009394 | -2,93E-01 | -1,548321858 | 3,01E-01 | 5,83E-01 | 8,38E-01 | Syn2          | 0,82 | No  |
| ENSMUSG00000009418 | 1,35E-01  | 6,92414466   | 4,92E+00 | 2,66E-02 | 1,83E-01 | Nav1          | 1,10 | No  |
| ENSMUSG00000009470 | 8,49E-02  | 7,45507036   | 2,05E+00 | 1,52E-01 | 4,94E-01 | Tnpo1         | 1,06 | No  |
| ENSMUSG00000009487 | 5,91E-01  | -2,448685441 | 3,90E-01 | 5,32E-01 | 8,06E-01 | Otog          | 1,51 | No  |
| ENSMUSG00000009535 | 2,46E-02  | 5,257309726  | 1,18E-01 | 7,31E-01 | 9,22E-01 | Rnmt          | 1,02 | No  |
| ENSMUSG00000009545 | 1,51E-01  | 0,1245466    | 2,79E-01 | 5,98E-01 | 8,45E-01 | Kcnq1         | 1,11 | No  |
| ENSMUSG00000009549 | 1,53E-02  | 6,043776687  | 5,54E-02 | 8,14E-01 | 9,68E-01 | Srp14         | 1,01 | No  |
| ENSMUSG00000009551 | 1,55E-01  | -1,535410776 | 9,41E-02 | 7,59E-01 | 9,36E-01 | 6330409D20Rik | 1,11 | No  |
| ENSMUSG00000009555 | 6,65E-02  | 6,718325648  | 1,15E+00 | 2,83E-01 | 5,79E-01 | Cdk9          | 1,05 | No  |
| ENSMUSG00000009563 | 1,19E-01  | 5,520641533  | 2,96E+00 | 8,52E-02 | 3,75E-01 | Tor2a         | 1,09 | No  |
| ENSMUSG00000009566 | 1,10E-01  | 3,006519692  | 9,48E-01 | 3,30E-01 | 6,31E-01 | Fpgs          | 1,08 | No  |
| ENSMUSG00000009569 | 1,57E-01  | 6,436211717  | 6,22E+00 | 1,26E-02 | 1,11E-01 | Mkl2          | 1,12 | No  |
| ENSMUSG00000009575 | 2,56E-01  | 7,049568732  | 1,79E+01 | 2,28E-05 | 6,96E-04 | Cbx5          | 1,19 | Yes |

|                    |           |              |           |          |          |            |      |     |
|--------------------|-----------|--------------|-----------|----------|----------|------------|------|-----|
| ENSMUSG00000009585 | -3,32E-01 | 7,118269535  | 3,06E+01  | 3,24E-08 | 2,00E-06 | Apobec3    | 0,79 | Yes |
| ENSMUSG00000009588 | -1,87E+00 | -3,107637761 | 1,39E+00  | 2,38E-01 | 5,50E-01 | St6galnac1 | 0,27 | No  |
| ENSMUSG00000009614 | 6,70E-01  | -0,295020578 | 3,68E+00  | 5,52E-02 | 2,88E-01 | Sardh      | 1,59 | No  |
| ENSMUSG00000009621 | 3,08E-02  | 6,334884827  | 2,35E-01  | 6,28E-01 | 8,61E-01 | Vav2       | 1,02 | No  |
| ENSMUSG00000009628 | -7,33E-02 | 1,146669906  | 1,50E-01  | 6,99E-01 | 9,04E-01 | Tex15      | 0,95 | No  |
| ENSMUSG00000009630 | -1,86E-01 | 5,838538457  | 7,76E+00  | 5,33E-03 | 5,86E-02 | Ppp2cb     | 0,88 | No  |
| ENSMUSG00000009633 | 3,48E-01  | -1,683246991 | 4,21E-01  | 5,16E-01 | 7,97E-01 | G0s2       | 1,27 | No  |
| ENSMUSG00000009640 | 2,23E-02  | 3,980962421  | 6,23E-02  | 8,03E-01 | 9,62E-01 | Dmap1      | 1,02 | No  |
| ENSMUSG00000009646 | -1,87E+00 | -3,107637761 | 1,39E+00  | 2,38E-01 | 5,50E-01 | Pla2g12b   | 0,27 | No  |
| ENSMUSG00000009647 | 1,61E-01  | 3,290035396  | 2,36E+00  | 1,25E-01 | 4,42E-01 | Mcu        | 1,12 | No  |
| ENSMUSG00000009654 | -1,47E-01 | 1,829107142  | 9,02E-01  | 3,42E-01 | 6,42E-01 | Oit3       | 0,90 | No  |
| ENSMUSG00000009681 | -1,19E-01 | 2,087246101  | 6,77E-01  | 4,10E-01 | 7,07E-01 | Bcr        | 0,92 | No  |
| ENSMUSG00000009687 | 1,79E-01  | 7,637242189  | 9,21E+00  | 2,40E-03 | 3,24E-02 | Fxyd5      | 1,13 | Yes |
| ENSMUSG00000009733 | -1,32E-02 | 2,538440371  | 1,07E-02  | 9,18E-01 | 1,00E+00 | Tfcp2      | 0,99 | No  |
| ENSMUSG00000009739 | 2,51E-01  | 1,927194332  | 2,59E+00  | 1,08E-01 | 4,02E-01 | Pou6f1     | 1,19 | No  |
| ENSMUSG00000009741 | -9,96E-03 | 6,800243027  | 2,63E-02  | 8,71E-01 | 1,00E+00 | Ubp1       | 0,99 | No  |
| ENSMUSG00000009772 | -4,23E-01 | 5,708128128  | 4,00E+01  | 2,50E-10 | 2,22E-08 | Nuak2      | 0,75 | Yes |
| ENSMUSG00000009828 | -2,15E-02 | 3,681846012  | 5,07E-02  | 8,22E-01 | 9,72E-01 | Ick        | 0,99 | No  |
| ENSMUSG00000009863 | 3,88E-02  | 6,092774399  | 3,57E-01  | 5,50E-01 | 8,17E-01 | Sdhb       | 1,03 | No  |
| ENSMUSG00000009876 | 8,02E-01  | -1,627619382 | 1,79E+00  | 1,81E-01 | 5,42E-01 | Cox4i2     | 1,74 | No  |
| ENSMUSG00000009894 | -2,36E-01 | 4,14884855   | 7,54E+00  | 6,02E-03 | 6,43E-02 | Snap47     | 0,85 | No  |
| ENSMUSG00000009900 | 3,14E-02  | -3,107617333 | -7,69E-10 | 1,00E+00 | 1,00E+00 | Wnt3a      | 1,02 | No  |
| ENSMUSG00000009905 | 2,09E-01  | 4,170184299  | 5,93E+00  | 1,49E-02 | 1,25E-01 | Kdsr       | 1,16 | No  |
| ENSMUSG00000009907 | -4,44E-02 | 6,912821258  | 5,31E-01  | 4,66E-01 | 7,55E-01 | Vps4b      | 0,97 | No  |
| ENSMUSG00000009927 | -2,21E-02 | 6,056515152  | 1,15E-01  | 7,35E-01 | 9,24E-01 | Rps25      | 0,98 | No  |
| ENSMUSG00000010021 | 2,08E-01  | 0,358384145  | 6,22E-01  | 4,30E-01 | 7,24E-01 | Kif19a     | 1,16 | No  |
| ENSMUSG00000010025 | 2,06E-02  | 6,519527407  | 1,09E-01  | 7,42E-01 | 9,27E-01 | Aldh3a2    | 1,01 | No  |
| ENSMUSG00000010044 | 1,12E+00  | -1,863707699 | 1,89E+00  | 1,70E-01 | 5,25E-01 | Zmynd10    | 2,18 | No  |
| ENSMUSG00000010045 | 2,10E-01  | 5,258643881  | 8,64E+00  | 3,29E-03 | 4,11E-02 | Tmem115    | 1,16 | Yes |
| ENSMUSG00000010047 | 8,79E-02  | 3,140039239  | 6,74E-01  | 4,12E-01 | 7,07E-01 | Hyal2      | 1,06 | No  |
| ENSMUSG00000010048 | 4,35E-02  | 3,787249948  | 2,22E-01  | 6,37E-01 | 8,68E-01 | lfrd2      | 1,03 | No  |
| ENSMUSG00000010051 | 7,17E-03  | 1,037476388  | 1,25E-03  | 9,72E-01 | 1,00E+00 | Hyal1      | 1,00 | No  |

|                    |           |              |           |          |          |               |      |     |
|--------------------|-----------|--------------|-----------|----------|----------|---------------|------|-----|
| ENSMUSG00000010054 | 6,46E-03  | 4,188936143  | 5,72E-03  | 9,40E-01 | 1,00E+00 | Tusc2         | 1,00 | No  |
| ENSMUSG00000010057 | -1,33E-01 | 3,142268293  | 1,49E+00  | 2,22E-01 | 5,50E-01 | Nprl2         | 0,91 | No  |
| ENSMUSG00000010066 | -8,17E-01 | 2,302357246  | 3,70E+01  | 1,21E-09 | 9,74E-08 | Cacna2d2      | 0,57 | Yes |
| ENSMUSG00000010067 | 8,65E-02  | 5,547548491  | 1,58E+00  | 2,09E-01 | 5,50E-01 | Rassf1        | 1,06 | No  |
| ENSMUSG00000010080 | 3,14E-02  | -3,107617333 | -7,69E-10 | 1,00E+00 | 1,00E+00 | Epn3          | 1,02 | No  |
| ENSMUSG00000010095 | -3,61E-02 | 8,101563965  | 3,87E-01  | 5,34E-01 | 8,07E-01 | Slc3a2        | 0,98 | No  |
| ENSMUSG00000010097 | -1,47E-01 | 7,152820542  | 6,00E+00  | 1,43E-02 | 1,22E-01 | Nxf1          | 0,90 | No  |
| ENSMUSG00000010110 | -1,58E-01 | 5,785908303  | 5,60E+00  | 1,79E-02 | 1,40E-01 | Stx5a         | 0,90 | No  |
| ENSMUSG00000010122 | -1,46E+00 | -2,600629085 | 2,20E+00  | 1,38E-01 | 4,68E-01 | Slc47a1       | 0,36 | No  |
| ENSMUSG00000010136 | 1,85E+00  | -3,107657832 | 1,35E+00  | 2,46E-01 | 5,50E-01 | Pifo          | 3,61 | No  |
| ENSMUSG00000010142 | 2,52E-01  | 6,07798455   | 1,50E+01  | 1,07E-04 | 2,58E-03 | Tnfrsf13b     | 1,19 | Yes |
| ENSMUSG00000010154 | 1,22E+00  | -2,711680537 | 9,22E-01  | 3,37E-01 | 6,37E-01 | Spire2        | 2,33 | No  |
| ENSMUSG00000010175 | 3,50E-01  | -0,770638961 | 7,90E-01  | 3,74E-01 | 6,75E-01 | Prox1         | 1,27 | No  |
| ENSMUSG00000010205 | 9,29E-02  | 5,702471779  | 1,90E+00  | 1,68E-01 | 5,23E-01 | Raver1        | 1,07 | No  |
| ENSMUSG00000010277 | 4,67E-02  | 8,577717955  | 6,63E-01  | 4,16E-01 | 7,11E-01 | 2610507B11Rik | 1,03 | No  |
| ENSMUSG00000010290 | 9,59E-02  | 4,084087184  | 1,21E+00  | 2,72E-01 | 5,68E-01 | AI597479      | 1,07 | No  |
| ENSMUSG00000010307 | 1,17E-01  | 5,491865795  | 2,84E+00  | 9,21E-02 | 3,82E-01 | Tmem86a       | 1,08 | No  |
| ENSMUSG00000010342 | -1,11E+00 | 1,15889281   | 3,39E+01  | 5,72E-09 | 4,16E-07 | Tex14         | 0,46 | Yes |
| ENSMUSG00000010358 | -2,53E-01 | 5,292618316  | 1,29E+01  | 3,21E-04 | 6,40E-03 | lfi35         | 0,84 | Yes |
| ENSMUSG00000010362 | -3,15E-01 | 1,856749849  | 4,13E+00  | 4,20E-02 | 2,44E-01 | Rdm1          | 0,80 | No  |
| ENSMUSG00000010376 | -5,26E-02 | 6,162072383  | 6,67E-01  | 4,14E-01 | 7,09E-01 | Nedd8         | 0,96 | No  |
| ENSMUSG00000010392 | 8,26E-02  | 5,751338289  | 1,52E+00  | 2,18E-01 | 5,50E-01 | Gosr1         | 1,06 | No  |
| ENSMUSG00000010406 | -1,67E-02 | 4,016904278  | 3,54E-02  | 8,51E-01 | 9,90E-01 | Mrpl52        | 0,99 | No  |
| ENSMUSG00000010453 | -3,13E-01 | 6,932873269  | 2,65E+01  | 2,63E-07 | 1,33E-05 | Kansl3        | 0,80 | Yes |
| ENSMUSG00000010461 | 4,14E-02  | 0,496136229  | 3,39E-02  | 8,54E-01 | 9,92E-01 | Eya4          | 1,03 | No  |
| ENSMUSG00000010476 | -1,33E-02 | -1,522626588 | 6,63E-04  | 9,79E-01 | 1,00E+00 | Ebf3          | 0,99 | No  |
| ENSMUSG00000010492 | -2,68E-02 | 2,210987842  | 3,75E-02  | 8,46E-01 | 9,87E-01 | Uckl1os       | 0,98 | No  |
| ENSMUSG00000010517 | -2,01E-01 | 5,033373172  | 7,54E+00  | 6,04E-03 | 6,45E-02 | Faf1          | 0,87 | No  |
| ENSMUSG00000010529 | -9,37E-01 | 2,804348606  | 6,38E+01  | 1,38E-15 | 2,26E-13 | Gm266         | 0,52 | Yes |
| ENSMUSG00000010538 | 4,38E-01  | -1,136587442 | 9,80E-01  | 3,22E-01 | 6,22E-01 | Tsacc         | 1,35 | No  |
| ENSMUSG00000010554 | -3,19E-02 | 4,293678642  | 1,48E-01  | 7,01E-01 | 9,05E-01 | Mettl16       | 0,98 | No  |
| ENSMUSG00000010592 | -5,78E-01 | -1,627564382 | 1,11E+00  | 2,91E-01 | 5,87E-01 | Dazl          | 0,67 | No  |

|                    |           |              |           |          |          |               |       |     |
|--------------------|-----------|--------------|-----------|----------|----------|---------------|-------|-----|
| ENSMUSG00000010601 | -1,24E+00 | -2,655120477 | 1,47E+00  | 2,25E-01 | 5,50E-01 | Apol7a        | 0,42  | No  |
| ENSMUSG00000010607 | -2,23E-01 | 4,017907582  | 6,42E+00  | 1,13E-02 | 1,02E-01 | Pigyl         | 0,86  | No  |
| ENSMUSG00000010608 | -8,15E-02 | 7,148519701  | 1,83E+00  | 1,76E-01 | 5,35E-01 | Rbm25         | 0,95  | No  |
| ENSMUSG00000010609 | -1,60E-01 | 5,570686475  | 5,49E+00  | 1,91E-02 | 1,47E-01 | Psen2         | 0,90  | No  |
| ENSMUSG00000010651 | 1,26E-01  | 3,97167154   | 1,97E+00  | 1,61E-01 | 5,09E-01 | Acaa1b        | 1,09  | No  |
| ENSMUSG00000010660 | 2,44E-01  | 3,247712627  | 5,14E+00  | 2,33E-02 | 1,67E-01 | Plcd1         | 1,18  | No  |
| ENSMUSG00000010663 | 2,92E-01  | 6,671419404  | 2,21E+01  | 2,53E-06 | 9,89E-05 | Fads1         | 1,22  | Yes |
| ENSMUSG00000010721 | 1,88E-01  | 1,608409519  | 1,23E+00  | 2,67E-01 | 5,63E-01 | Lmbr1         | 1,14  | No  |
| ENSMUSG00000010751 | 2,69E-01  | 3,132900973  | 6,10E+00  | 1,35E-02 | 1,17E-01 | Tnfrsf22      | 1,21  | No  |
| ENSMUSG00000010755 | 5,95E-02  | 4,652152604  | 5,77E-01  | 4,47E-01 | 7,38E-01 | Cars          | 1,04  | No  |
| ENSMUSG00000010760 | 3,51E+00  | -2,770631773 | 5,34E+00  | 2,08E-02 | 1,55E-01 | Phlda2        | 11,37 | No  |
| ENSMUSG00000010797 | -1,94E+00 | -3,107619243 | 1,50E+00  | 2,21E-01 | 5,50E-01 | Wnt2          | 0,26  | No  |
| ENSMUSG00000010825 | 4,15E-01  | -2,963274112 | 8,72E-02  | 7,68E-01 | 9,41E-01 | Grid2ip       | 1,33  | No  |
| ENSMUSG00000010830 | 2,93E-01  | 0,839358979  | 1,73E+00  | 1,88E-01 | 5,50E-01 | Kdelr3        | 1,23  | No  |
| ENSMUSG00000010841 | -1,44E+00 | -1,574012045 | 5,27E+00  | 2,17E-02 | 1,59E-01 | 1700006E09Rik | 0,37  | No  |
| ENSMUSG00000010911 | 1,03E-02  | 3,672052999  | 1,17E-02  | 9,14E-01 | 1,00E+00 | Apip          | 1,01  | No  |
| ENSMUSG00000010914 | 1,02E-01  | 4,33727466   | 1,51E+00  | 2,19E-01 | 5,50E-01 | Pdhx          | 1,07  | No  |
| ENSMUSG00000010936 | 7,77E-02  | 6,87062998   | 1,61E+00  | 2,04E-01 | 5,50E-01 | Vac14         | 1,06  | No  |
| ENSMUSG00000011008 | 2,95E-01  | 5,226390401  | 1,70E+01  | 3,81E-05 | 1,08E-03 | Mcoln2        | 1,23  | Yes |
| ENSMUSG00000011034 | 3,14E-02  | -3,107617333 | -7,69E-10 | 1,00E+00 | 1,00E+00 | Slc5a1        | 1,02  | No  |
| ENSMUSG00000011052 | -6,09E-02 | -2,831981081 | 2,08E-03  | 9,64E-01 | 1,00E+00 | 1700049J03Rik | 0,96  | No  |
| ENSMUSG00000011096 | 4,59E-02  | 4,964140497  | 3,81E-01  | 5,37E-01 | 8,09E-01 | Akt1s1        | 1,03  | No  |
| ENSMUSG00000011114 | -9,25E-02 | 6,112019209  | 2,05E+00  | 1,52E-01 | 4,94E-01 | Tbrg1         | 0,94  | No  |
| ENSMUSG00000011118 | -1,38E+00 | -2,831931116 | 1,19E+00  | 2,75E-01 | 5,71E-01 | Panx3         | 0,38  | No  |
| ENSMUSG00000011148 | 1,43E-01  | 4,474508613  | 3,10E+00  | 7,81E-02 | 3,57E-01 | Adssl1        | 1,10  | No  |
| ENSMUSG00000011154 | 3,06E-01  | -0,980664725 | 5,18E-01  | 4,72E-01 | 7,60E-01 | Cfap161       | 1,24  | No  |
| ENSMUSG00000011158 | 2,37E-02  | 5,44895848   | 1,16E-01  | 7,34E-01 | 9,23E-01 | Brf1          | 1,02  | No  |
| ENSMUSG00000011171 | 5,99E-01  | 0,057908609  | 4,15E+00  | 4,15E-02 | 2,42E-01 | Vipr2         | 1,51  | No  |
| ENSMUSG00000011179 | -1,11E-01 | 6,16891942   | 2,94E+00  | 8,66E-02 | 3,78E-01 | Odc1          | 0,93  | No  |
| ENSMUSG00000011254 | 1,18E-01  | 2,850251415  | 1,02E+00  | 3,13E-01 | 6,14E-01 | Thg1l         | 1,09  | No  |
| ENSMUSG00000011256 | -2,88E-01 | 5,886509633  | 1,92E+01  | 1,17E-05 | 3,88E-04 | Adam19        | 0,82  | Yes |
| ENSMUSG00000011257 | -6,53E-02 | 5,172102563  | 8,14E-01  | 3,67E-01 | 6,68E-01 | Pabpc4        | 0,96  | No  |

|                    |           |              |           |          |          |               |      |     |
|--------------------|-----------|--------------|-----------|----------|----------|---------------|------|-----|
| ENSMUSG00000011263 | -7,10E-02 | -2,448674888 | 6,98E-03  | 9,33E-01 | 1,00E+00 | Exoc3l2       | 0,95 | No  |
| ENSMUSG00000011267 | -3,52E-01 | 3,002074102  | 1,03E+01  | 1,30E-03 | 2,00E-02 | Zfp296        | 0,78 | Yes |
| ENSMUSG00000011305 | -8,80E-01 | -2,832047555 | 4,24E-01  | 5,15E-01 | 7,96E-01 | Plin5         | 0,54 | No  |
| ENSMUSG00000011306 | -7,54E-02 | 4,870074292  | 1,01E+00  | 3,16E-01 | 6,16E-01 | Sugp1         | 0,95 | No  |
| ENSMUSG00000011350 | -9,34E-01 | -2,600674645 | 7,65E-01  | 3,82E-01 | 6,83E-01 | Gm5893        | 0,52 | No  |
| ENSMUSG00000011382 | -5,60E-02 | 3,619924792  | 3,44E-01  | 5,58E-01 | 8,22E-01 | Dhdh          | 0,96 | No  |
| ENSMUSG00000011427 | 1,86E-01  | 2,541371786  | 2,30E+00  | 1,30E-01 | 4,52E-01 | Zfp790        | 1,14 | No  |
| ENSMUSG00000011463 | 1,87E+00  | -3,107639691 | 1,38E+00  | 2,40E-01 | 5,50E-01 | Cpb1          | 3,67 | No  |
| ENSMUSG00000011486 | 2,74E-02  | -3,033621357 | 9,16E-12  | 1,00E+00 | 1,00E+00 | Slc25a41      | 1,02 | No  |
| ENSMUSG00000011589 | 1,54E-01  | -2,107624009 | 4,13E-02  | 8,39E-01 | 9,83E-01 | Fsd1          | 1,11 | No  |
| ENSMUSG00000011658 | 5,76E-02  | 4,472299077  | 5,09E-01  | 4,75E-01 | 7,63E-01 | Fuz           | 1,04 | No  |
| ENSMUSG00000011751 | -6,85E-01 | -0,460813043 | 3,71E+00  | 5,41E-02 | 2,84E-01 | Sptbn4        | 0,62 | No  |
| ENSMUSG00000011752 | 2,03E-01  | 8,080970247  | 1,21E+01  | 4,91E-04 | 9,04E-03 | Pgam1         | 1,15 | Yes |
| ENSMUSG00000011831 | 1,92E-01  | 5,658814529  | 7,93E+00  | 4,87E-03 | 5,49E-02 | Evi5          | 1,14 | No  |
| ENSMUSG00000011832 | 7,47E-02  | 3,895759508  | 6,69E-01  | 4,14E-01 | 7,09E-01 | Evi5l         | 1,05 | No  |
| ENSMUSG00000011837 | -2,65E-02 | 4,002163035  | 8,91E-02  | 7,65E-01 | 9,40E-01 | Snapc2        | 0,98 | No  |
| ENSMUSG00000011877 | 2,76E-02  | 6,429051605  | 1,92E-01  | 6,61E-01 | 8,82E-01 | Git1          | 1,02 | No  |
| ENSMUSG00000011884 | 5,01E-02  | 8,095282776  | 7,46E-01  | 3,88E-01 | 6,88E-01 | Gltp          | 1,04 | No  |
| ENSMUSG00000011958 | 2,96E-02  | 7,076489041  | 2,40E-01  | 6,24E-01 | 8,59E-01 | Bnip2         | 1,02 | No  |
| ENSMUSG00000011960 | -6,26E-03 | 5,699332373  | 8,68E-03  | 9,26E-01 | 1,00E+00 | Ccnt1         | 1,00 | No  |
| ENSMUSG00000012017 | -7,41E-02 | 1,825403211  | 2,27E-01  | 6,34E-01 | 8,66E-01 | Scarf2        | 0,95 | No  |
| ENSMUSG00000012042 | -1,87E+00 | -3,107637761 | 1,39E+00  | 2,38E-01 | 5,50E-01 | 4930579F01Rik | 0,27 | No  |
| ENSMUSG00000012076 | 1,77E-01  | 3,529076912  | 3,26E+00  | 7,12E-02 | 3,38E-01 | Brms1l        | 1,13 | No  |
| ENSMUSG00000012114 | 1,07E-01  | 7,025486337  | 3,12E+00  | 7,74E-02 | 3,55E-01 | Med15         | 1,08 | No  |
| ENSMUSG00000012117 | 1,73E-01  | 5,970227071  | 6,93E+00  | 8,50E-03 | 8,28E-02 | Dhdds         | 1,13 | No  |
| ENSMUSG00000012123 | -1,33E-01 | 0,299245573  | 2,59E-01  | 6,11E-01 | 8,52E-01 | Crybg2        | 0,91 | No  |
| ENSMUSG00000012126 | 4,81E-02  | 6,643988707  | 6,03E-01  | 4,37E-01 | 7,30E-01 | Ubxn11        | 1,03 | No  |
| ENSMUSG00000012187 | 9,01E-03  | -3,107646452 | -5,16E-10 | 1,00E+00 | 1,00E+00 | Mogat1        | 1,01 | No  |
| ENSMUSG00000012211 | -1,97E+00 | -2,800969006 | 2,04E+00  | 1,53E-01 | 4,96E-01 | Tex22         | 0,26 | No  |
| ENSMUSG00000012296 | -3,15E-02 | 4,526021847  | 1,55E-01  | 6,94E-01 | 9,02E-01 | Tjap1         | 0,98 | No  |
| ENSMUSG00000012350 | 4,67E-01  | 1,741715403  | 9,03E+00  | 2,66E-03 | 3,49E-02 | Ehf           | 1,38 | Yes |
| ENSMUSG00000012405 | -2,65E-01 | 6,23989988   | 1,72E+01  | 3,44E-05 | 9,86E-04 | Rpl15         | 0,83 | Yes |

|                    |           |              |          |          |          |               |      |     |
|--------------------|-----------|--------------|----------|----------|----------|---------------|------|-----|
| ENSMUSG00000012422 | -4,40E-02 | 6,372721947  | 4,82E-01 | 4,87E-01 | 7,74E-01 | Tmem167       | 0,97 | No  |
| ENSMUSG00000012429 | 9,15E-02  | 3,011374801  | 6,69E-01 | 4,13E-01 | 7,09E-01 | Mplkip        | 1,07 | No  |
| ENSMUSG00000012443 | 2,79E-01  | 6,000297665  | 1,81E+01 | 2,11E-05 | 6,51E-04 | Kif11         | 1,21 | Yes |
| ENSMUSG00000012483 | -1,68E-01 | 2,819963281  | 1,98E+00 | 1,60E-01 | 5,07E-01 | Rpa3          | 0,89 | No  |
| ENSMUSG00000012519 | 4,49E-02  | 4,394268975  | 3,01E-01 | 5,84E-01 | 8,38E-01 | Mlkl          | 1,03 | No  |
| ENSMUSG00000012535 | 1,29E-01  | 6,28844084   | 4,12E+00 | 4,23E-02 | 2,45E-01 | Tnpo3         | 1,09 | No  |
| ENSMUSG00000012609 | 6,58E-02  | 3,500726918  | 4,37E-01 | 5,09E-01 | 7,92E-01 | Ttll5         | 1,05 | No  |
| ENSMUSG00000012640 | 2,17E-01  | 5,072067374  | 8,80E+00 | 3,01E-03 | 3,84E-02 | Zfp715        | 1,16 | Yes |
| ENSMUSG00000012705 | 1,03E+00  | -2,401477134 | 1,36E+00 | 2,44E-01 | 5,50E-01 | Retn          | 2,04 | No  |
| ENSMUSG00000012777 | 2,18E-01  | 3,30748169   | 4,21E+00 | 4,01E-02 | 2,38E-01 | Acpt          | 1,16 | No  |
| ENSMUSG00000012819 | 3,83E-01  | 3,57811301   | 1,54E+01 | 8,66E-05 | 2,15E-03 | Cdh23         | 1,30 | Yes |
| ENSMUSG00000012848 | -1,21E-01 | 8,487668081  | 4,45E+00 | 3,48E-02 | 2,21E-01 | Rps5          | 0,92 | No  |
| ENSMUSG00000012889 | 4,21E-01  | -2,711707266 | 1,38E-01 | 7,10E-01 | 9,09E-01 | Podnl1        | 1,34 | No  |
| ENSMUSG00000013033 | -8,64E-02 | 1,908259686  | 3,04E-01 | 5,81E-01 | 8,37E-01 | Adgrl1        | 0,94 | No  |
| ENSMUSG00000013076 | 3,17E-01  | 1,229095183  | 2,69E+00 | 1,01E-01 | 3,92E-01 | Amotl1        | 1,25 | No  |
| ENSMUSG00000013083 | -2,65E+00 | -3,033633091 | 2,78E+00 | 9,55E-02 | 3,86E-01 | 2200002J24Rik | 0,16 | No  |
| ENSMUSG00000013089 | 2,74E-01  | 5,009879273  | 1,37E+01 | 2,16E-04 | 4,63E-03 | Etv5          | 1,21 | Yes |
| ENSMUSG00000013091 | 6,69E-01  | -1,355548541 | 1,60E+00 | 2,06E-01 | 5,50E-01 | Tmem190       | 1,59 | No  |
| ENSMUSG00000013150 | -1,77E-01 | 0,814507883  | 6,68E-01 | 4,14E-01 | 7,09E-01 | Gfod2         | 0,88 | No  |
| ENSMUSG00000013155 | 3,02E-01  | 2,03977716   | 3,99E+00 | 4,57E-02 | 2,55E-01 | Enkd1         | 1,23 | No  |
| ENSMUSG00000013158 | 9,17E-02  | -1,006784418 | 4,56E-02 | 8,31E-01 | 9,78E-01 | 4933405L10Rik | 1,07 | No  |
| ENSMUSG00000013160 | 3,24E-02  | 7,993116783  | 3,11E-01 | 5,77E-01 | 8,35E-01 | Atp6v0d1      | 1,02 | No  |
| ENSMUSG00000013236 | -1,82E-01 | 6,863395168  | 8,81E+00 | 2,99E-03 | 3,82E-02 | Ptprs         | 0,88 | Yes |
| ENSMUSG00000013275 | -1,52E-01 | 5,467061687  | 4,90E+00 | 2,68E-02 | 1,83E-01 | Slc41a1       | 0,90 | No  |
| ENSMUSG00000013338 | 7,19E-01  | -2,655190923 | 2,82E-01 | 5,95E-01 | 8,44E-01 | Fer1l4        | 1,65 | No  |
| ENSMUSG00000013353 | -8,62E-01 | -2,574116638 | 8,67E-01 | 3,52E-01 | 6,53E-01 | 4931406B18Rik | 0,55 | No  |
| ENSMUSG00000013367 | 1,43E-01  | 0,545062344  | 3,78E-01 | 5,39E-01 | 8,09E-01 | Iglon5        | 1,10 | No  |
| ENSMUSG00000013415 | -3,71E-01 | 0,375789516  | 2,25E+00 | 1,34E-01 | 4,60E-01 | Igf2bp1       | 0,77 | No  |
| ENSMUSG00000013418 | -3,67E-01 | 0,73197791   | 2,57E+00 | 1,09E-01 | 4,04E-01 | B4galnt2      | 0,78 | No  |
| ENSMUSG00000013419 | -5,28E-01 | 0,647620634  | 5,07E+00 | 2,44E-02 | 1,72E-01 | Zfp651        | 0,69 | No  |
| ENSMUSG00000013465 | -6,52E-02 | 6,126917995  | 1,02E+00 | 3,13E-01 | 6,12E-01 | Nelfb         | 0,96 | No  |
| ENSMUSG00000013483 | 8,37E-02  | 2,290383098  | 3,75E-01 | 5,40E-01 | 8,10E-01 | Card14        | 1,06 | No  |



|                    |           |              |          |          |          |               |      |     |
|--------------------|-----------|--------------|----------|----------|----------|---------------|------|-----|
| ENSMUSG00000013495 | 9,66E-02  | 4,47357423   | 1,45E+00 | 2,28E-01 | 5,50E-01 | Tmem175       | 1,07 | No  |
| ENSMUSG00000013523 | -3,70E-01 | 2,19504905   | 6,79E+00 | 9,16E-03 | 8,74E-02 | Bcas1         | 0,77 | No  |
| ENSMUSG00000013539 | 8,49E-02  | 4,71994945   | 1,21E+00 | 2,72E-01 | 5,68E-01 | Tango2        | 1,06 | No  |
| ENSMUSG00000013562 | 3,91E-01  | -1,801049151 | 3,69E-01 | 5,44E-01 | 8,12E-01 | 4833413E03Rik | 1,31 | No  |
| ENSMUSG00000013584 | -6,42E-01 | 7,133761692  | 1,14E+02 | 1,62E-26 | 6,39E-24 | Aldh1a2       | 0,64 | Yes |
| ENSMUSG00000013593 | -2,09E-02 | 6,740121375  | 1,15E-01 | 7,35E-01 | 9,24E-01 | Ndufs2        | 0,99 | No  |
| ENSMUSG00000013622 | 1,14E-01  | 4,860357841  | 2,25E+00 | 1,33E-01 | 4,59E-01 | Atraid        | 1,08 | No  |
| ENSMUSG00000013629 | 2,75E-02  | 6,996291098  | 2,06E-01 | 6,50E-01 | 8,76E-01 | Cad           | 1,02 | No  |
| ENSMUSG00000013646 | 1,58E-01  | 4,610376016  | 4,07E+00 | 4,37E-02 | 2,49E-01 | Sh3bp5l       | 1,12 | No  |
| ENSMUSG00000013662 | 5,66E-02  | 5,999351509  | 7,47E-01 | 3,87E-01 | 6,87E-01 | Atad1         | 1,04 | No  |
| ENSMUSG00000013663 | 8,04E-03  | 7,237615835  | 1,80E-02 | 8,93E-01 | 1,00E+00 | Pten          | 1,01 | No  |
| ENSMUSG00000013698 | 1,38E-01  | 8,277477982  | 5,70E+00 | 1,69E-02 | 1,36E-01 | Pea15a        | 1,10 | No  |
| ENSMUSG00000013701 | 5,91E-02  | 4,486660648  | 5,25E-01 | 4,69E-01 | 7,57E-01 | Timm23        | 1,04 | No  |
| ENSMUSG00000013707 | 1,52E-01  | 5,622679884  | 4,96E+00 | 2,60E-02 | 1,80E-01 | Tnfaip8l2     | 1,11 | No  |
| ENSMUSG00000013736 | 1,23E-01  | 4,9724152    | 2,76E+00 | 9,69E-02 | 3,88E-01 | Trnt1         | 1,09 | No  |
| ENSMUSG00000013766 | 2,61E+00  | -2,929330338 | 2,64E+00 | 1,04E-01 | 3,97E-01 | Ly6g6e        | 6,10 | No  |
| ENSMUSG00000013787 | -1,19E-01 | 7,669044196  | 4,10E+00 | 4,28E-02 | 2,46E-01 | Ehmt2         | 0,92 | No  |
| ENSMUSG00000013822 | -5,31E-02 | 5,366581219  | 5,70E-01 | 4,50E-01 | 7,40E-01 | Elof1         | 0,96 | No  |
| ENSMUSG00000013833 | -1,38E-01 | 5,268930155  | 3,74E+00 | 5,31E-02 | 2,81E-01 | Med16         | 0,91 | No  |
| ENSMUSG00000013846 | 6,85E-02  | 7,728697594  | 1,36E+00 | 2,43E-01 | 5,50E-01 | St3gal1       | 1,05 | No  |
| ENSMUSG00000013858 | -2,35E-02 | 6,367537938  | 1,38E-01 | 7,10E-01 | 9,10E-01 | Tmem259       | 0,98 | No  |
| ENSMUSG00000013878 | -7,92E-02 | 3,97405964   | 7,99E-01 | 3,71E-01 | 6,72E-01 | Rnf170        | 0,95 | No  |
| ENSMUSG00000013921 | -1,70E+00 | -2,497510488 | 3,20E+00 | 7,38E-02 | 3,45E-01 | Clip3         | 0,31 | No  |
| ENSMUSG00000013928 | 4,93E-02  | -0,03345436  | 2,71E-02 | 8,69E-01 | 1,00E+00 | Thap8         | 1,03 | No  |
| ENSMUSG00000013936 | -3,09E-02 | -2,832023973 | 6,09E-04 | 9,80E-01 | 1,00E+00 | Myl2          | 0,98 | No  |
| ENSMUSG00000013973 | -1,07E-01 | 4,346603459  | 1,70E+00 | 1,92E-01 | 5,50E-01 | Dedd          | 0,93 | No  |
| ENSMUSG00000013974 | -1,34E-02 | 4,537945907  | 2,79E-02 | 8,67E-01 | 9,99E-01 | Mcomp1        | 0,99 | No  |
| ENSMUSG00000013997 | -1,13E-01 | 5,290313459  | 2,54E+00 | 1,11E-01 | 4,10E-01 | Nit1          | 0,92 | No  |
| ENSMUSG00000014030 | -2,03E+00 | -1,587306643 | 8,86E+00 | 2,92E-03 | 3,76E-02 | Pax5          | 0,25 | Yes |
| ENSMUSG00000014039 | 6,37E-03  | 4,105863997  | 5,52E-03 | 9,41E-01 | 1,00E+00 | Prdm15        | 1,00 | No  |
| ENSMUSG00000014074 | 2,00E-01  | 4,804328407  | 6,96E+00 | 8,36E-03 | 8,19E-02 | Rnf168        | 1,15 | No  |
| ENSMUSG00000014075 | -3,59E-01 | 2,736541353  | 8,80E+00 | 3,01E-03 | 3,84E-02 | Tctex1d2      | 0,78 | Yes |

|                    |           |              |           |          |          |         |      |     |
|--------------------|-----------|--------------|-----------|----------|----------|---------|------|-----|
| ENSMUSG00000014077 | -5,64E-02 | 7,287903015  | 8,91E-01  | 3,45E-01 | 6,46E-01 | Chp1    | 0,96 | No  |
| ENSMUSG00000014158 | 4,41E-01  | 4,443995988  | 2,80E+01  | 1,22E-07 | 6,68E-06 | Trpv4   | 1,36 | Yes |
| ENSMUSG00000014164 | 1,29E-01  | 3,632205338  | 1,79E+00  | 1,81E-01 | 5,43E-01 | Klhl3   | 1,09 | No  |
| ENSMUSG00000014177 | 4,52E-02  | 3,729597287  | 2,31E-01  | 6,31E-01 | 8,63E-01 | Tvp23b  | 1,03 | No  |
| ENSMUSG00000014195 | -1,45E-01 | 6,162015347  | 5,07E+00  | 2,43E-02 | 1,71E-01 | Dnajc7  | 0,90 | No  |
| ENSMUSG00000014198 | -1,66E-01 | 0,26992866   | 3,66E-01  | 5,45E-01 | 8,13E-01 | Zfp385c | 0,89 | No  |
| ENSMUSG00000014226 | 5,11E-02  | 5,557781351  | 5,53E-01  | 4,57E-01 | 7,46E-01 | Cacybp  | 1,04 | No  |
| ENSMUSG00000014232 | -3,37E-02 | 2,583660301  | 6,97E-02  | 7,92E-01 | 9,55E-01 | Cluap1  | 0,98 | No  |
| ENSMUSG00000014243 | 2,90E-02  | 2,709253129  | 5,52E-02  | 8,14E-01 | 9,68E-01 | Zswim7  | 1,02 | No  |
| ENSMUSG00000014245 | 3,49E-02  | 2,704142232  | 8,16E-02  | 7,75E-01 | 9,45E-01 | Pigl    | 1,02 | No  |
| ENSMUSG00000014294 | -7,25E-02 | 5,531736572  | 1,11E+00  | 2,93E-01 | 5,88E-01 | Ndufa2  | 0,95 | No  |
| ENSMUSG00000014301 | -1,64E-01 | 0,511912271  | 4,56E-01  | 4,99E-01 | 7,85E-01 | Pam16   | 0,89 | No  |
| ENSMUSG00000014303 | 4,25E-01  | 0,206389079  | 2,38E+00  | 1,23E-01 | 4,38E-01 | Glis2   | 1,34 | No  |
| ENSMUSG00000014313 | -3,90E-02 | 5,197094592  | 2,94E-01  | 5,88E-01 | 8,40E-01 | Cox6c   | 0,97 | No  |
| ENSMUSG00000014329 | -5,62E-01 | -2,574192075 | 3,38E-01  | 5,61E-01 | 8,24E-01 | Bicc1   | 0,68 | No  |
| ENSMUSG00000014349 | -7,58E-02 | 7,122142017  | 1,59E+00  | 2,08E-01 | 5,50E-01 | Ube2z   | 0,95 | No  |
| ENSMUSG00000014351 | 1,36E-02  | -2,963265738 | -4,74E-10 | 1,00E+00 | 1,00E+00 | Gip     | 1,01 | No  |
| ENSMUSG00000014353 | 1,44E-01  | 5,92713247   | 4,77E+00  | 2,90E-02 | 1,94E-01 | Tmem87b | 1,11 | No  |
| ENSMUSG00000014355 | 4,73E-02  | 7,025675406  | 6,08E-01  | 4,35E-01 | 7,28E-01 | Anapc1  | 1,03 | No  |
| ENSMUSG00000014361 | 1,98E-01  | 6,663562865  | 1,01E+01  | 1,48E-03 | 2,21E-02 | Mertk   | 1,15 | Yes |
| ENSMUSG00000014402 | 4,07E-02  | 5,499096798  | 3,47E-01  | 5,56E-01 | 8,21E-01 | Tsg101  | 1,03 | No  |
| ENSMUSG00000014418 | 1,54E-01  | 6,254641819  | 5,85E+00  | 1,56E-02 | 1,29E-01 | Hps5    | 1,11 | No  |
| ENSMUSG00000014426 | 2,51E-01  | 4,838247559  | 1,08E+01  | 1,01E-03 | 1,63E-02 | Map3k4  | 1,19 | Yes |
| ENSMUSG00000014444 | 1,34E-01  | 8,07343462   | 5,34E+00  | 2,08E-02 | 1,55E-01 | Piezo1  | 1,10 | No  |
| ENSMUSG00000014453 | 2,61E-01  | -1,015752117 | 2,84E-01  | 5,94E-01 | 8,43E-01 | Blk     | 1,20 | No  |
| ENSMUSG00000014470 | 1,64E-01  | 6,267672099  | 6,57E+00  | 1,03E-02 | 9,58E-02 | Rnf166  | 1,12 | No  |
| ENSMUSG00000014496 | 2,67E-01  | 4,482250818  | 1,07E+01  | 1,09E-03 | 1,74E-02 | Ankrd28 | 1,20 | Yes |
| ENSMUSG00000014498 | 2,69E-02  | 7,057487185  | 1,99E-01  | 6,56E-01 | 8,80E-01 | Ankrd52 | 1,02 | No  |
| ENSMUSG00000014503 | -9,77E-02 | 3,789307132  | 1,12E+00  | 2,90E-01 | 5,86E-01 | Pkd2l2  | 0,93 | No  |
| ENSMUSG00000014504 | -1,44E-02 | 4,958862858  | 3,67E-02  | 8,48E-01 | 9,88E-01 | Srp19   | 0,99 | No  |
| ENSMUSG00000014529 | -1,67E-02 | -2,963250293 | 1,29E-04  | 9,91E-01 | 1,00E+00 | Tmbim7  | 0,99 | No  |
| ENSMUSG00000014543 | -5,88E-02 | 2,01476345   | 1,53E-01  | 6,96E-01 | 9,03E-01 | Klra17  | 0,96 | No  |

|                    |           |              |          |          |          |               |      |     |
|--------------------|-----------|--------------|----------|----------|----------|---------------|------|-----|
| ENSMUSG00000014547 | 2,94E-01  | 8,341196707  | 2,59E+01 | 3,62E-07 | 1,78E-05 | Wdfy2         | 1,23 | Yes |
| ENSMUSG00000014550 | 4,37E-02  | 5,364115748  | 3,84E-01 | 5,35E-01 | 8,08E-01 | Rbsn          | 1,03 | No  |
| ENSMUSG00000014551 | -1,08E-01 | 5,152595885  | 2,23E+00 | 1,35E-01 | 4,63E-01 | Mrps25        | 0,93 | No  |
| ENSMUSG00000014554 | -5,55E-02 | 4,432677242  | 4,77E-01 | 4,90E-01 | 7,76E-01 | Dguok         | 0,96 | No  |
| ENSMUSG00000014592 | 5,78E-02  | 2,602485823  | 2,17E-01 | 6,42E-01 | 8,71E-01 | Camta1        | 1,04 | No  |
| ENSMUSG00000014599 | -3,12E-01 | 6,450710023  | 2,42E+01 | 8,58E-07 | 3,89E-05 | Csf1          | 0,81 | Yes |
| ENSMUSG00000014601 | 2,07E-01  | 5,649578791  | 9,23E+00 | 2,38E-03 | 3,22E-02 | Strip1        | 1,15 | Yes |
| ENSMUSG00000014602 | 5,65E-01  | 3,756955361  | 3,56E+01 | 2,43E-09 | 1,86E-07 | Kif1a         | 1,48 | Yes |
| ENSMUSG00000014606 | -9,12E-03 | 6,681038074  | 2,17E-02 | 8,83E-01 | 1,00E+00 | Slc25a11      | 0,99 | No  |
| ENSMUSG00000014609 | 5,08E-02  | -1,10765267  | 1,36E-02 | 9,07E-01 | 1,00E+00 | Chrne         | 1,04 | No  |
| ENSMUSG00000014633 | -4,14E-01 | 4,124367224  | 2,32E+01 | 1,43E-06 | 6,08E-05 | Cmc2          | 0,75 | Yes |
| ENSMUSG00000014668 | -3,47E-02 | 6,319084294  | 2,99E-01 | 5,85E-01 | 8,38E-01 | Chfr          | 0,98 | No  |
| ENSMUSG00000014686 | 9,77E-02  | 0,934370469  | 2,11E-01 | 6,46E-01 | 8,74E-01 | Ceacam16      | 1,07 | No  |
| ENSMUSG00000014704 | -8,63E-02 | -2,548227689 | 6,73E-03 | 9,35E-01 | 1,00E+00 | Hoxa2         | 0,94 | No  |
| ENSMUSG00000014747 | 2,07E-01  | -0,185724501 | 4,38E-01 | 5,08E-01 | 7,92E-01 | Ankrd53       | 1,15 | No  |
| ENSMUSG00000014748 | 1,44E-01  | 6,940180344  | 5,61E+00 | 1,79E-02 | 1,40E-01 | Tex261        | 1,11 | No  |
| ENSMUSG00000014763 | -1,13E-01 | 5,004486245  | 2,36E+00 | 1,25E-01 | 4,42E-01 | Fam120b       | 0,92 | No  |
| ENSMUSG00000014767 | -1,52E-02 | 4,832476694  | 4,04E-02 | 8,41E-01 | 9,84E-01 | Tbp           | 0,99 | No  |
| ENSMUSG00000014769 | -1,92E-01 | 6,429109045  | 9,23E+00 | 2,39E-03 | 3,23E-02 | Psmb1         | 0,88 | Yes |
| ENSMUSG00000014771 | -3,29E-02 | 2,974534794  | 8,38E-02 | 7,72E-01 | 9,43E-01 | Pdcd2         | 0,98 | No  |
| ENSMUSG00000014773 | -1,40E+00 | -0,704421173 | 1,25E+01 | 4,03E-04 | 7,67E-03 | Dll1          | 0,38 | Yes |
| ENSMUSG00000014776 | -2,54E-01 | 0,42614927   | 9,77E-01 | 3,23E-01 | 6,23E-01 | Nol3          | 0,84 | No  |
| ENSMUSG00000014778 | 1,24E-02  | 5,587146499  | 3,32E-02 | 8,55E-01 | 9,92E-01 | Fhod1         | 1,01 | No  |
| ENSMUSG00000014782 | -3,75E-01 | 0,429318     | 2,11E+00 | 1,47E-01 | 4,85E-01 | Plekhg4       | 0,77 | No  |
| ENSMUSG00000014786 | 9,82E-02  | 3,667732482  | 1,06E+00 | 3,03E-01 | 6,00E-01 | Slc9a5        | 1,07 | No  |
| ENSMUSG00000014791 | -1,32E-01 | 1,538061962  | 5,73E-01 | 4,49E-01 | 7,39E-01 | Elmo3         | 0,91 | No  |
| ENSMUSG00000014813 | -1,92E+00 | -2,963268013 | 1,46E+00 | 2,27E-01 | 5,50E-01 | Stc1          | 0,26 | No  |
| ENSMUSG00000014837 | -8,75E-02 | 1,878207089  | 3,29E-01 | 5,66E-01 | 8,29E-01 | 4931428F04Rik | 0,94 | No  |
| ENSMUSG00000014846 | 4,68E-01  | 4,2630299    | 2,97E+01 | 5,13E-08 | 3,04E-06 | Tppp3         | 1,38 | Yes |
| ENSMUSG00000014850 | 1,46E-01  | 3,647496337  | 2,24E+00 | 1,34E-01 | 4,61E-01 | Msh3          | 1,11 | No  |
| ENSMUSG00000014852 | -7,02E-01 | -0,785452221 | 2,70E+00 | 1,00E-01 | 3,92E-01 | Adamts13      | 0,61 | No  |
| ENSMUSG00000014856 | 3,47E-02  | 4,374746449  | 1,80E-01 | 6,71E-01 | 8,89E-01 | Tmem208       | 1,02 | No  |

|                    |           |              |           |          |          |          |      |     |
|--------------------|-----------|--------------|-----------|----------|----------|----------|------|-----|
| ENSMUSG00000014859 | 2,84E-02  | 6,001257664  | 1,89E-01  | 6,64E-01 | 8,84E-01 | E2f4     | 1,02 | No  |
| ENSMUSG00000014867 | 5,45E-02  | 8,430329789  | 8,96E-01  | 3,44E-01 | 6,44E-01 | Surf4    | 1,04 | No  |
| ENSMUSG00000014873 | 1,78E-02  | 4,380771708  | 4,71E-02  | 8,28E-01 | 9,76E-01 | Surf2    | 1,01 | No  |
| ENSMUSG00000014905 | 1,52E-01  | 5,295189347  | 4,59E+00  | 3,21E-02 | 2,08E-01 | Dnajb9   | 1,11 | No  |
| ENSMUSG00000014907 | 2,24E-01  | 3,206777467  | 4,36E+00  | 3,69E-02 | 2,28E-01 | Naf1     | 1,17 | No  |
| ENSMUSG00000014932 | -7,88E-01 | 1,814849538  | 2,55E+01  | 4,37E-07 | 2,11E-05 | Yes1     | 0,58 | Yes |
| ENSMUSG00000014956 | 5,11E-02  | 7,108689803  | 7,18E-01  | 3,97E-01 | 6,97E-01 | Ppp1cb   | 1,04 | No  |
| ENSMUSG00000014959 | -2,38E-02 | 6,836553532  | 1,51E-01  | 6,97E-01 | 9,03E-01 | Gorasp2  | 0,98 | No  |
| ENSMUSG00000014980 | 2,92E-01  | 2,47261733   | 4,91E+00  | 2,67E-02 | 1,83E-01 | Tsen15   | 1,22 | No  |
| ENSMUSG00000015001 | 7,35E-01  | -2,896163881 | 2,94E-01  | 5,87E-01 | 8,40E-01 | Oc90     | 1,66 | No  |
| ENSMUSG00000015002 | 6,80E-02  | 6,81475992   | 1,23E+00  | 2,68E-01 | 5,65E-01 | Efr3a    | 1,05 | No  |
| ENSMUSG00000015013 | 6,16E-02  | 4,432465642  | 5,51E-01  | 4,58E-01 | 7,47E-01 | Trappc2l | 1,04 | No  |
| ENSMUSG00000015016 | 2,93E-02  | 3,970669977  | 1,07E-01  | 7,43E-01 | 9,28E-01 | Acsf3    | 1,02 | No  |
| ENSMUSG00000015023 | -4,08E-02 | 5,501107853  | 3,46E-01  | 5,56E-01 | 8,21E-01 | Ddx19a   | 0,97 | No  |
| ENSMUSG00000015027 | 4,56E-02  | 5,035755107  | 3,83E-01  | 5,36E-01 | 8,08E-01 | Galns    | 1,03 | No  |
| ENSMUSG00000015053 | -3,21E-01 | 2,097741062  | 5,01E+00  | 2,52E-02 | 1,76E-01 | Gata2    | 0,80 | No  |
| ENSMUSG00000015083 | -5,75E-02 | 2,027016104  | 1,39E-01  | 7,10E-01 | 9,09E-01 | C8g      | 0,96 | No  |
| ENSMUSG00000015085 | -9,39E-01 | -1,929212473 | 1,62E+00  | 2,03E-01 | 5,50E-01 | Entpd2   | 0,52 | No  |
| ENSMUSG00000015087 | 5,82E-02  | 6,187302332  | 8,16E-01  | 3,66E-01 | 6,67E-01 | Rabl6    | 1,04 | No  |
| ENSMUSG00000015090 | 9,01E-03  | -3,107646452 | -5,16E-10 | 1,00E+00 | 1,00E+00 | Ptgds    | 1,01 | No  |
| ENSMUSG00000015092 | -1,10E-01 | 5,831778312  | 2,74E+00  | 9,77E-02 | 3,90E-01 | Edf1     | 0,93 | No  |
| ENSMUSG00000015093 | -6,00E-01 | -0,561093951 | 2,61E+00  | 1,06E-01 | 3,99E-01 | Clic3    | 0,66 | No  |
| ENSMUSG00000015094 | -6,34E-02 | 1,198939168  | 1,08E-01  | 7,42E-01 | 9,28E-01 | Npdc1    | 0,96 | No  |
| ENSMUSG00000015095 | 1,65E-02  | 5,762003574  | 6,08E-02  | 8,05E-01 | 9,63E-01 | Fbxw5    | 1,01 | No  |
| ENSMUSG00000015112 | 9,43E-02  | 5,000092788  | 1,64E+00  | 2,01E-01 | 5,50E-01 | Slc25a13 | 1,07 | No  |
| ENSMUSG00000015120 | -1,55E-01 | 6,708730491  | 6,29E+00  | 1,21E-02 | 1,08E-01 | Ube2i    | 0,90 | No  |
| ENSMUSG00000015126 | -2,01E-01 | 3,312578517  | 3,70E+00  | 5,45E-02 | 2,86E-01 | Tsr3     | 0,87 | No  |
| ENSMUSG00000015127 | -2,24E-02 | 3,744104012  | 5,86E-02  | 8,09E-01 | 9,65E-01 | Unkl     | 0,98 | No  |
| ENSMUSG00000015133 | -2,94E-01 | 7,772209489  | 2,52E+01  | 5,20E-07 | 2,47E-05 | Lrrk1    | 0,82 | Yes |
| ENSMUSG00000015134 | -1,12E+00 | -1,831997996 | 2,86E+00  | 9,06E-02 | 3,82E-01 | Aldh1a3  | 0,46 | No  |
| ENSMUSG00000015143 | -1,63E-01 | 8,250732185  | 7,95E+00  | 4,81E-03 | 5,43E-02 | Actn1    | 0,89 | No  |
| ENSMUSG00000015149 | -1,00E-03 | 6,147114796  | 2,41E-04  | 9,88E-01 | 1,00E+00 | Sirt2    | 1,00 | No  |

|                    |           |              |           |          |          |           |      |     |
|--------------------|-----------|--------------|-----------|----------|----------|-----------|------|-----|
| ENSMUSG00000015165 | -4,41E-03 | 7,680126739  | 5,62E-03  | 9,40E-01 | 1,00E+00 | Hnrnpl    | 1,00 | No  |
| ENSMUSG00000015176 | 1,33E-01  | 5,949202795  | 4,05E+00  | 4,42E-02 | 2,50E-01 | Nolc1     | 1,10 | No  |
| ENSMUSG00000015189 | 1,34E-01  | 4,621938294  | 2,92E+00  | 8,74E-02 | 3,78E-01 | Casd1     | 1,10 | No  |
| ENSMUSG00000015202 | 1,78E-01  | 4,767906126  | 5,32E+00  | 2,11E-02 | 1,57E-01 | Cnksr3    | 1,13 | No  |
| ENSMUSG00000015222 | -3,84E-01 | -1,896180708 | 3,42E-01  | 5,58E-01 | 8,22E-01 | Map2      | 0,77 | No  |
| ENSMUSG00000015224 | 2,22E-01  | -2,401386689 | 6,22E-02  | 8,03E-01 | 9,62E-01 | Cyp2j9    | 1,17 | No  |
| ENSMUSG00000015243 | 1,80E-01  | 7,777295265  | 9,46E+00  | 2,10E-03 | 2,90E-02 | Abca1     | 1,13 | Yes |
| ENSMUSG00000015247 | 3,63E-02  | 5,459293187  | 2,72E-01  | 6,02E-01 | 8,48E-01 | Nipsnap3b | 1,03 | No  |
| ENSMUSG00000015305 | 2,23E-01  | 5,427203297  | 9,94E+00  | 1,61E-03 | 2,36E-02 | Sash1     | 1,17 | Yes |
| ENSMUSG00000015312 | -5,31E-01 | 4,991631392  | 5,28E+01  | 3,65E-13 | 4,72E-11 | Gadd45b   | 0,69 | Yes |
| ENSMUSG00000015314 | 3,59E-03  | 2,852042547  | 9,35E-04  | 9,76E-01 | 1,00E+00 | Slamf6    | 1,00 | No  |
| ENSMUSG00000015316 | -1,05E+00 | 2,199328046  | 5,78E+01  | 2,85E-14 | 4,07E-12 | Slamf1    | 0,48 | Yes |
| ENSMUSG00000015335 | 9,33E-02  | 4,542096444  | 1,36E+00  | 2,43E-01 | 5,50E-01 | Zdhhc12   | 1,07 | No  |
| ENSMUSG00000015337 | 9,39E-02  | 3,189686166  | 7,65E-01  | 3,82E-01 | 6,83E-01 | Endog     | 1,07 | No  |
| ENSMUSG00000015341 | -2,40E-02 | 6,746880479  | 1,52E-01  | 6,97E-01 | 9,03E-01 | Golga7    | 0,98 | No  |
| ENSMUSG00000015354 | -3,83E-02 | -3,107651936 | -7,91E-11 | 1,00E+00 | 1,00E+00 | Pcolce2   | 0,97 | No  |
| ENSMUSG00000015355 | -5,17E-03 | 6,906694374  | 7,20E-03  | 9,32E-01 | 1,00E+00 | Cd48      | 1,00 | No  |
| ENSMUSG00000015357 | 1,01E-01  | 4,581794984  | 1,62E+00  | 2,03E-01 | 5,50E-01 | Clpx      | 1,07 | No  |
| ENSMUSG00000015363 | -4,80E-02 | 6,181661879  | 5,58E-01  | 4,55E-01 | 7,45E-01 | Trabd     | 0,97 | No  |
| ENSMUSG00000015365 | 1,11E+00  | -2,655174566 | 1,17E+00  | 2,79E-01 | 5,75E-01 | Mov10l1   | 2,16 | No  |
| ENSMUSG00000015377 | -2,66E-01 | 2,106262323  | 3,38E+00  | 6,61E-02 | 3,23E-01 | Dennd6b   | 0,83 | No  |
| ENSMUSG00000015396 | -7,48E-01 | 7,461340037  | 1,58E+02  | 2,75E-36 | 2,50E-33 | Cd83      | 0,60 | Yes |
| ENSMUSG00000015443 | -1,94E+00 | -3,107619243 | 1,50E+00  | 2,21E-01 | 5,50E-01 | Gzmn      | 0,26 | No  |
| ENSMUSG00000015451 | -2,49E-01 | 1,349112669  | 1,81E+00  | 1,78E-01 | 5,39E-01 | C4a       | 0,84 | No  |
| ENSMUSG00000015452 | -1,41E-01 | 1,049621663  | 4,78E-01  | 4,89E-01 | 7,76E-01 | Ager      | 0,91 | No  |
| ENSMUSG00000015461 | 1,18E-01  | 5,537415567  | 2,96E+00  | 8,54E-02 | 3,76E-01 | Atf6b     | 1,09 | No  |
| ENSMUSG00000015467 | 9,27E-02  | 0,836852383  | 1,71E-01  | 6,79E-01 | 8,93E-01 | Egfl8     | 1,07 | No  |
| ENSMUSG00000015468 | 6,84E-03  | -1,378271254 | 1,70E-04  | 9,90E-01 | 1,00E+00 | Notch4    | 1,00 | No  |
| ENSMUSG00000015474 | 1,38E-01  | 4,484584837  | 2,88E+00  | 8,94E-02 | 3,79E-01 | Ppt2      | 1,10 | No  |
| ENSMUSG00000015476 | 7,89E-01  | -1,448820184 | 1,94E+00  | 1,64E-01 | 5,15E-01 | Prmt1     | 1,73 | No  |
| ENSMUSG00000015478 | -8,05E-02 | 4,072698429  | 8,41E-01  | 3,59E-01 | 6,61E-01 | Rnf5      | 0,95 | No  |
| ENSMUSG00000015484 | -3,83E-02 | -3,107651936 | -7,91E-11 | 1,00E+00 | 1,00E+00 | Fam163a   | 0,97 | No  |

|                    |           |              |          |          |          |         |      |     |
|--------------------|-----------|--------------|----------|----------|----------|---------|------|-----|
| ENSMUSG00000015488 | -1,22E-01 | 4,472078247  | 2,33E+00 | 1,27E-01 | 4,46E-01 | Cacfd1  | 0,92 | No  |
| ENSMUSG00000015501 | -2,65E-01 | 4,02904833   | 9,22E+00 | 2,39E-03 | 3,23E-02 | Hivep2  | 0,83 | Yes |
| ENSMUSG00000015522 | 1,11E-01  | 6,04217031   | 2,88E+00 | 8,97E-02 | 3,80E-01 | Arnt    | 1,08 | No  |
| ENSMUSG00000015533 | 1,73E-01  | -0,69721133  | 1,75E-01 | 6,76E-01 | 8,91E-01 | Itga2   | 1,13 | No  |
| ENSMUSG00000015536 | 6,64E-02  | 4,81450136   | 7,60E-01 | 3,83E-01 | 6,85E-01 | Mocs2   | 1,05 | No  |
| ENSMUSG00000015542 | 5,07E-02  | 3,406631695  | 2,50E-01 | 6,17E-01 | 8,55E-01 | Nat9    | 1,04 | No  |
| ENSMUSG00000015568 | 3,51E-02  | 11,34658762  | 3,95E-01 | 5,30E-01 | 8,05E-01 | Lpl     | 1,02 | No  |
| ENSMUSG00000015575 | -2,86E-02 | 7,81574644   | 2,38E-01 | 6,26E-01 | 8,60E-01 | Atp6v0e | 0,98 | No  |
| ENSMUSG00000015579 | 1,85E+00  | -3,107657832 | 1,35E+00 | 2,46E-01 | 5,50E-01 | Nkx2-5  | 3,61 | No  |
| ENSMUSG00000015597 | -4,11E-02 | 5,634901345  | 3,68E-01 | 5,44E-01 | 8,13E-01 | Zfp318  | 0,97 | No  |
| ENSMUSG00000015599 | -9,47E-01 | -2,655129153 | 7,86E-01 | 3,75E-01 | 6,76E-01 | Ttbk1   | 0,52 | No  |
| ENSMUSG00000015605 | -1,80E-02 | 6,176591309  | 7,74E-02 | 7,81E-01 | 9,49E-01 | Srf     | 0,99 | No  |
| ENSMUSG00000015619 | 6,91E-01  | -1,574219033 | 1,43E+00 | 2,33E-01 | 5,50E-01 | Gata3   | 1,61 | No  |
| ENSMUSG00000015647 | -1,25E+00 | 1,181555975  | 3,91E+01 | 4,12E-10 | 3,59E-08 | Lama5   | 0,42 | Yes |
| ENSMUSG00000015652 | 7,31E-01  | -2,963267542 | 2,91E-01 | 5,90E-01 | 8,41E-01 | Steap1  | 1,66 | No  |
| ENSMUSG00000015653 | -2,65E+00 | -2,896109668 | 2,80E+00 | 9,45E-02 | 3,85E-01 | Steap2  | 0,16 | No  |
| ENSMUSG00000015656 | -1,13E-01 | 9,320187062  | 3,99E+00 | 4,59E-02 | 2,55E-01 | Hspa8   | 0,92 | No  |
| ENSMUSG00000015659 | 1,56E-01  | 3,031072285  | 2,00E+00 | 1,57E-01 | 5,02E-01 | Serac1  | 1,11 | No  |
| ENSMUSG00000015671 | -1,10E-01 | 5,183095365  | 2,33E+00 | 1,27E-01 | 4,46E-01 | Psma2   | 0,93 | No  |
| ENSMUSG00000015672 | -1,52E-01 | 4,274192119  | 3,27E+00 | 7,06E-02 | 3,36E-01 | Mrpl32  | 0,90 | No  |
| ENSMUSG00000015697 | 1,96E-01  | 6,277773374  | 9,46E+00 | 2,10E-03 | 2,91E-02 | Setdb1  | 1,15 | Yes |
| ENSMUSG00000015702 | 6,28E-02  | 2,140438111  | 1,90E-01 | 6,63E-01 | 8,83E-01 | Anxa9   | 1,04 | No  |
| ENSMUSG00000015709 | 2,68E-02  | 3,908845614  | 8,66E-02 | 7,69E-01 | 9,41E-01 | Arnt2   | 1,02 | No  |
| ENSMUSG00000015711 | -8,80E-02 | 4,82634913   | 1,32E+00 | 2,51E-01 | 5,50E-01 | Prune1  | 0,94 | No  |
| ENSMUSG00000015714 | 7,12E-02  | 7,331080241  | 1,42E+00 | 2,34E-01 | 5,50E-01 | Cers2   | 1,05 | No  |
| ENSMUSG00000015733 | 8,96E-02  | 8,643907035  | 2,45E+00 | 1,18E-01 | 4,26E-01 | Capza2  | 1,06 | No  |
| ENSMUSG00000015745 | 2,20E-02  | 7,664365171  | 1,39E-01 | 7,09E-01 | 9,09E-01 | Plekho1 | 1,02 | No  |
| ENSMUSG00000015747 | 1,47E-01  | 4,328353404  | 3,12E+00 | 7,74E-02 | 3,55E-01 | Vps45   | 1,11 | No  |
| ENSMUSG00000015748 | 8,58E-02  | 4,832512049  | 1,29E+00 | 2,57E-01 | 5,50E-01 | Prpf3   | 1,06 | No  |
| ENSMUSG00000015749 | 9,47E-02  | 6,943884753  | 2,41E+00 | 1,20E-01 | 4,32E-01 | Anp32e  | 1,07 | No  |
| ENSMUSG00000015750 | 1,79E-02  | 6,383039864  | 7,99E-02 | 7,77E-01 | 9,47E-01 | Aph1a   | 1,01 | No  |
| ENSMUSG00000015755 | -5,11E-02 | 7,2615515    | 7,29E-01 | 3,93E-01 | 6,93E-01 | Tab2    | 0,97 | No  |

|                    |           |              |           |          |          |               |      |     |
|--------------------|-----------|--------------|-----------|----------|----------|---------------|------|-----|
| ENSMUSG00000015757 | 1,17E-02  | 5,099669036  | 2,58E-02  | 8,72E-01 | 1,00E+00 | Ppil4         | 1,01 | No  |
| ENSMUSG00000015759 | 6,36E-03  | 6,154975928  | 9,70E-03  | 9,22E-01 | 1,00E+00 | Cnih1         | 1,00 | No  |
| ENSMUSG00000015766 | 3,24E-01  | 7,228090504  | 2,90E+01  | 7,29E-08 | 4,18E-06 | Eps8          | 1,25 | Yes |
| ENSMUSG00000015776 | 3,45E-02  | 6,005560554  | 2,80E-01  | 5,96E-01 | 8,45E-01 | Med22         | 1,02 | No  |
| ENSMUSG00000015790 | -1,46E-01 | 4,211087766  | 2,96E+00  | 8,52E-02 | 3,75E-01 | Surf1         | 0,90 | No  |
| ENSMUSG00000015804 | -8,35E-02 | 5,621027542  | 1,50E+00  | 2,20E-01 | 5,50E-01 | Med28         | 0,94 | No  |
| ENSMUSG00000015806 | 5,15E-02  | 5,931688804  | 6,10E-01  | 4,35E-01 | 7,28E-01 | Qdpr          | 1,04 | No  |
| ENSMUSG00000015812 | -2,70E-01 | 0,309945691  | 1,12E+00  | 2,91E-01 | 5,86E-01 | Gnrh1         | 0,83 | No  |
| ENSMUSG00000015829 | -7,93E-02 | -1,522538944 | 2,20E-02  | 8,82E-01 | 1,00E+00 | Tnr           | 0,95 | No  |
| ENSMUSG00000015837 | -2,78E-01 | 8,555279389  | 2,34E+01  | 1,32E-06 | 5,72E-05 | Sqstm1        | 0,83 | Yes |
| ENSMUSG00000015839 | 1,36E-01  | 8,353752885  | 5,55E+00  | 1,85E-02 | 1,44E-01 | Nfe2l2        | 1,10 | No  |
| ENSMUSG00000015846 | 3,54E-01  | 7,110248849  | 3,39E+01  | 5,88E-09 | 4,27E-07 | Rxra          | 1,28 | Yes |
| ENSMUSG00000015850 | -3,06E-01 | 4,457706076  | 1,43E+01  | 1,57E-04 | 3,53E-03 | Adamtsl4      | 0,81 | Yes |
| ENSMUSG00000015852 | 7,39E-01  | 7,350698899  | 1,50E+02  | 1,91E-34 | 1,47E-31 | Fcrls         | 1,67 | Yes |
| ENSMUSG00000015854 | -2,56E-01 | 2,203122011  | 3,14E+00  | 7,64E-02 | 3,52E-01 | Cd5l          | 0,84 | No  |
| ENSMUSG00000015869 | -4,58E-02 | 5,141583759  | 4,02E-01  | 5,26E-01 | 8,03E-01 | Prpsap1       | 0,97 | No  |
| ENSMUSG00000015879 | 1,83E-01  | -1,060891142 | 1,66E-01  | 6,83E-01 | 8,95E-01 | Fam184b       | 1,14 | No  |
| ENSMUSG00000015880 | 2,27E-01  | 4,931725623  | 9,28E+00  | 2,32E-03 | 3,15E-02 | Ncapg         | 1,17 | Yes |
| ENSMUSG00000015882 | 9,60E-02  | 4,677613352  | 1,51E+00  | 2,20E-01 | 5,50E-01 | Lcorl         | 1,07 | No  |
| ENSMUSG00000015889 | 1,09E-01  | 7,370592227  | 3,35E+00  | 6,74E-02 | 3,27E-01 | Lta4h         | 1,08 | No  |
| ENSMUSG00000015890 | 3,99E-01  | -2,107482367 | 2,54E-01  | 6,14E-01 | 8,53E-01 | Amdhd1        | 1,32 | No  |
| ENSMUSG00000015932 | -1,23E-01 | 8,345456194  | 4,54E+00  | 3,31E-02 | 2,13E-01 | Dstn          | 0,92 | No  |
| ENSMUSG00000015937 | -4,41E-02 | 8,138004569  | 5,77E-01  | 4,47E-01 | 7,38E-01 | H2afy         | 0,97 | No  |
| ENSMUSG00000015942 | -2,43E-02 | 5,95852784   | 1,37E-01  | 7,12E-01 | 9,11E-01 | Gtf2ird2      | 0,98 | No  |
| ENSMUSG00000015943 | 7,54E-02  | 2,628385238  | 3,59E-01  | 5,49E-01 | 8,16E-01 | Bola1         | 1,05 | No  |
| ENSMUSG00000015944 | -4,38E-01 | 6,575336404  | 4,98E+01  | 1,74E-12 | 2,06E-10 | Gatsl2        | 0,74 | Yes |
| ENSMUSG00000015947 | 4,80E-01  | 6,920732552  | 6,10E+01  | 5,81E-15 | 9,07E-13 | Fcgr1         | 1,39 | Yes |
| ENSMUSG00000015950 | -6,65E-02 | 8,669971763  | 1,35E+00  | 2,45E-01 | 5,50E-01 | Ncf1          | 0,95 | No  |
| ENSMUSG00000015957 | -5,97E-01 | 3,166091979  | 3,08E+01  | 2,89E-08 | 1,81E-06 | Wnt11         | 0,66 | Yes |
| ENSMUSG00000015961 | 4,39E-02  | 5,628069806  | 4,15E-01  | 5,20E-01 | 7,99E-01 | Adss          | 1,03 | No  |
| ENSMUSG00000015962 | 9,01E-03  | -3,107646452 | -5,16E-10 | 1,00E+00 | 1,00E+00 | 1700016C15Rik | 1,01 | No  |
| ENSMUSG00000015966 | -1,06E-01 | -1,561033296 | 3,49E-02  | 8,52E-01 | 9,90E-01 | Il17rb        | 0,93 | No  |

|                    |           |              |          |          |          |         |      |     |
|--------------------|-----------|--------------|----------|----------|----------|---------|------|-----|
| ENSMUSG00000015968 | -5,79E-01 | 3,224593594  | 3,08E+01 | 2,88E-08 | 1,80E-06 | Cacna1d | 0,67 | Yes |
| ENSMUSG00000015970 | -1,93E-01 | 0,079065771  | 4,77E-01 | 4,90E-01 | 7,76E-01 | Chdh    | 0,87 | No  |
| ENSMUSG00000015971 | 1,70E-02  | 4,683667389  | 4,81E-02 | 8,26E-01 | 9,75E-01 | Actr8   | 1,01 | No  |
| ENSMUSG00000015980 | -6,06E-02 | 2,546369244  | 2,21E-01 | 6,38E-01 | 8,68E-01 | Lrrc27  | 0,96 | No  |
| ENSMUSG00000015981 | 2,39E-02  | 4,17304781   | 7,86E-02 | 7,79E-01 | 9,48E-01 | Stk32c  | 1,02 | No  |
| ENSMUSG00000015994 | 6,43E-02  | 5,568330136  | 8,80E-01 | 3,48E-01 | 6,49E-01 | Fnta    | 1,05 | No  |
| ENSMUSG00000016018 | 9,37E-03  | 5,546813283  | 1,85E-02 | 8,92E-01 | 1,00E+00 | Skiv2l2 | 1,01 | No  |
| ENSMUSG00000016024 | 8,44E-02  | -0,998032625 | 3,33E-02 | 8,55E-01 | 9,92E-01 | Lbp     | 1,06 | No  |
| ENSMUSG00000016028 | 5,48E-01  | 2,25430511   | 1,41E+01 | 1,71E-04 | 3,81E-03 | Celsr1  | 1,46 | Yes |
| ENSMUSG00000016087 | 8,52E-02  | 5,222579038  | 1,39E+00 | 2,38E-01 | 5,50E-01 | Fli1    | 1,06 | No  |
| ENSMUSG00000016128 | 3,84E-01  | -1,126685921 | 6,81E-01 | 4,09E-01 | 7,06E-01 | Stard13 | 1,31 | No  |
| ENSMUSG00000016179 | -2,65E+00 | -3,033633091 | 2,78E+00 | 9,55E-02 | 3,86E-01 | Camk1g  | 0,16 | No  |
| ENSMUSG00000016181 | 1,79E-01  | 3,976980528  | 4,14E+00 | 4,19E-02 | 2,43E-01 | Diexf   | 1,13 | No  |
| ENSMUSG00000016194 | -1,98E-01 | 1,52088824   | 1,22E+00 | 2,70E-01 | 5,66E-01 | Hsd11b1 | 0,87 | No  |
| ENSMUSG00000016200 | -3,49E-02 | -2,9632767   | 7,31E-11 | 1,00E+00 | 1,00E+00 | Syt14   | 0,98 | No  |
| ENSMUSG00000016206 | -3,68E-02 | 5,494629501  | 2,83E-01 | 5,95E-01 | 8,44E-01 | H2-M3   | 0,97 | No  |
| ENSMUSG00000016252 | -1,20E-01 | 6,791354223  | 3,78E+00 | 5,19E-02 | 2,78E-01 | Atp5e   | 0,92 | No  |
| ENSMUSG00000016253 | -1,51E-01 | 5,173296217  | 4,38E+00 | 3,65E-02 | 2,27E-01 | Nelfcd  | 0,90 | No  |
| ENSMUSG00000016255 | 5,16E-01  | -0,413112368 | 2,47E+00 | 1,16E-01 | 4,21E-01 | Tubb1   | 1,43 | No  |
| ENSMUSG00000016256 | -6,11E-02 | 10,34377873  | 1,19E+00 | 2,76E-01 | 5,72E-01 | Ctsz    | 0,96 | No  |
| ENSMUSG00000016257 | -8,51E-02 | 5,885907752  | 1,65E+00 | 1,99E-01 | 5,50E-01 | Preli3b | 0,94 | No  |
| ENSMUSG00000016262 | -2,74E+00 | -3,033596063 | 2,99E+00 | 8,38E-02 | 3,71E-01 | Sertad4 | 0,15 | No  |
| ENSMUSG00000016283 | -1,69E-01 | 7,526933286  | 8,20E+00 | 4,18E-03 | 4,89E-02 | H2-M2   | 0,89 | Yes |
| ENSMUSG00000016344 | -5,75E-01 | 5,106731293  | 6,33E+01 | 1,76E-15 | 2,79E-13 | Ppdpf   | 0,67 | Yes |
| ENSMUSG00000016346 | -1,14E-02 | -3,033635021 | 1,50E-05 | 9,97E-01 | 1,00E+00 | Kcnq2   | 0,99 | No  |
| ENSMUSG00000016349 | 3,67E-01  | 3,087459396  | 1,11E+01 | 8,71E-04 | 1,44E-02 | Eef1a2  | 1,29 | Yes |
| ENSMUSG00000016356 | 3,97E-01  | 1,511384894  | 5,03E+00 | 2,49E-02 | 1,74E-01 | Col20a1 | 1,32 | No  |
| ENSMUSG00000016458 | -1,94E+00 | -3,107619243 | 1,50E+00 | 2,21E-01 | 5,50E-01 | Wt1     | 0,26 | No  |
| ENSMUSG00000016477 | 1,38E-01  | 4,432576618  | 2,85E+00 | 9,16E-02 | 3,82E-01 | E2f3    | 1,10 | No  |
| ENSMUSG00000016481 | -2,15E-03 | 5,200837906  | 8,93E-04 | 9,76E-01 | 1,00E+00 | Cr1l    | 1,00 | No  |
| ENSMUSG00000016487 | 1,47E-01  | 6,08563104   | 5,12E+00 | 2,37E-02 | 1,69E-01 | Ppfibp1 | 1,11 | No  |
| ENSMUSG00000016493 | -4,20E-02 | 0,122848063  | 2,02E-02 | 8,87E-01 | 1,00E+00 | Cd46    | 0,97 | No  |



|                    |           |              |          |          |          |          |      |     |
|--------------------|-----------|--------------|----------|----------|----------|----------|------|-----|
| ENSMUSG00000016494 | 1,00E-01  | 4,07379515   | 1,33E+00 | 2,49E-01 | 5,50E-01 | Cd34     | 1,07 | No  |
| ENSMUSG00000016495 | -3,73E-02 | 6,628316466  | 3,62E-01 | 5,47E-01 | 8,15E-01 | Plgrkt   | 0,97 | No  |
| ENSMUSG00000016496 | -3,49E-01 | 8,972486452  | 3,76E+01 | 8,67E-10 | 7,16E-08 | Cd274    | 0,78 | Yes |
| ENSMUSG00000016498 | -7,59E-02 | 7,095166275  | 1,58E+00 | 2,08E-01 | 5,50E-01 | Pdcd1lg2 | 0,95 | No  |
| ENSMUSG00000016503 | 1,23E-01  | 4,345550294  | 2,22E+00 | 1,36E-01 | 4,65E-01 | Gtf3a    | 1,09 | No  |
| ENSMUSG00000016510 | 2,50E-02  | 4,112839891  | 8,41E-02 | 7,72E-01 | 9,43E-01 | Mtif3    | 1,02 | No  |
| ENSMUSG00000016520 | -2,80E-01 | 4,306432786  | 1,15E+01 | 7,14E-04 | 1,23E-02 | Lnx2     | 0,82 | Yes |
| ENSMUSG00000016524 | -7,38E-02 | -3,033634644 | 2,66E-03 | 9,59E-01 | 1,00E+00 | Il19     | 0,95 | No  |
| ENSMUSG00000016526 | -4,06E-02 | 2,919371417  | 1,24E-01 | 7,25E-01 | 9,18E-01 | Dyrk3    | 0,97 | No  |
| ENSMUSG00000016528 | -6,44E-02 | 7,735338376  | 1,20E+00 | 2,73E-01 | 5,69E-01 | Mapkapk2 | 0,96 | No  |
| ENSMUSG00000016529 | -6,07E-02 | -2,770591764 | 2,49E-03 | 9,60E-01 | 1,00E+00 | Il10     | 0,96 | No  |
| ENSMUSG00000016541 | 2,45E-05  | 6,219124128  | 1,46E-07 | 1,00E+00 | 1,00E+00 | Atxn10   | 1,00 | No  |
| ENSMUSG00000016552 | 2,54E-01  | 5,620788869  | 1,39E+01 | 1,97E-04 | 4,29E-03 | Foxred2  | 1,19 | Yes |
| ENSMUSG00000016554 | -1,66E-02 | 6,419217157  | 6,89E-02 | 7,93E-01 | 9,56E-01 | Eif3d    | 0,99 | No  |
| ENSMUSG00000016559 | -1,01E-01 | 9,03394394   | 3,18E+00 | 7,46E-02 | 3,47E-01 | H3f3b    | 0,93 | No  |
| ENSMUSG00000016619 | 3,36E-02  | 6,03637502   | 2,66E-01 | 6,06E-01 | 8,50E-01 | Nup50    | 1,02 | No  |
| ENSMUSG00000016624 | 1,71E-01  | -1,165790208 | 1,26E-01 | 7,23E-01 | 9,17E-01 | Phf21b   | 1,13 | No  |
| ENSMUSG00000016637 | 9,99E-02  | 2,9439547    | 7,41E-01 | 3,89E-01 | 6,90E-01 | lft27    | 1,07 | No  |
| ENSMUSG00000016664 | 5,39E-02  | 7,593682977  | 8,33E-01 | 3,61E-01 | 6,63E-01 | Pacsin2  | 1,04 | No  |
| ENSMUSG00000016756 | -3,13E-01 | 0,213977379  | 1,46E+00 | 2,27E-01 | 5,50E-01 | Cmah     | 0,80 | No  |
| ENSMUSG00000016757 | 1,07E-01  | 4,899024568  | 2,03E+00 | 1,54E-01 | 4,97E-01 | Ttll12   | 1,08 | No  |
| ENSMUSG00000016758 | -1,40E-01 | -1,107697542 | 9,80E-02 | 7,54E-01 | 9,34E-01 | Bik      | 0,91 | No  |
| ENSMUSG00000016763 | -2,02E+00 | 1,244732052  | 1,03E+02 | 4,02E-24 | 1,32E-21 | Scube1   | 0,25 | Yes |
| ENSMUSG00000016831 | 8,09E-03  | 6,739452737  | 1,72E-02 | 8,96E-01 | 1,00E+00 | Tox4     | 1,01 | No  |
| ENSMUSG00000016833 | -1,64E-01 | 1,720202641  | 1,00E+00 | 3,17E-01 | 6,18E-01 | Mrps18c  | 0,89 | No  |
| ENSMUSG00000016918 | -8,38E-01 | -1,54822644  | 2,54E+00 | 1,11E-01 | 4,08E-01 | Sulf1    | 0,56 | No  |
| ENSMUSG00000016921 | 6,17E-02  | 7,742277353  | 1,10E+00 | 2,93E-01 | 5,89E-01 | Srsf6    | 1,04 | No  |
| ENSMUSG00000016933 | -1,79E-02 | 4,757604317  | 5,45E-02 | 8,15E-01 | 9,69E-01 | Plcg1    | 0,99 | No  |
| ENSMUSG00000016940 | 2,47E-02  | 4,181986837  | 8,50E-02 | 7,71E-01 | 9,42E-01 | Kctd2    | 1,02 | No  |
| ENSMUSG00000016942 | 6,95E-01  | -2,311205898 | 7,01E-01 | 4,02E-01 | 7,01E-01 | Tmprss6  | 1,62 | No  |
| ENSMUSG00000016946 | 7,05E-02  | 4,856298333  | 8,73E-01 | 3,50E-01 | 6,51E-01 | Kctd5    | 1,05 | No  |
| ENSMUSG00000016982 | -2,70E+00 | -2,896043557 | 2,88E+00 | 8,95E-02 | 3,79E-01 | Pom121l2 | 0,15 | No  |

|                    |           |              |          |          |          |         |      |     |
|--------------------|-----------|--------------|----------|----------|----------|---------|------|-----|
| ENSMUSG00000016984 | 9,53E-02  | 3,7771204    | 1,05E+00 | 3,07E-01 | 6,04E-01 | Etaa1   | 1,07 | No  |
| ENSMUSG00000016995 | -1,87E+00 | -3,107637761 | 1,39E+00 | 2,38E-01 | 5,50E-01 | Matn4   | 0,27 | No  |
| ENSMUSG00000017002 | 9,96E-02  | 2,673674526  | 6,31E-01 | 4,27E-01 | 7,21E-01 | Slpi    | 1,07 | No  |
| ENSMUSG00000017009 | 1,56E-01  | 4,129652484  | 3,23E+00 | 7,24E-02 | 3,41E-01 | Sdc4    | 1,11 | No  |
| ENSMUSG00000017119 | 5,20E-02  | 6,294669434  | 6,71E-01 | 4,13E-01 | 7,08E-01 | Nbr1    | 1,04 | No  |
| ENSMUSG00000017132 | 5,27E-03  | 7,266202472  | 7,77E-03 | 9,30E-01 | 1,00E+00 | Cyth1   | 1,00 | No  |
| ENSMUSG00000017144 | 1,25E-01  | 5,342275019  | 3,17E+00 | 7,51E-02 | 3,49E-01 | Rnd3    | 1,09 | No  |
| ENSMUSG00000017146 | 1,34E-01  | 5,214494194  | 3,48E+00 | 6,22E-02 | 3,10E-01 | Brca1   | 1,10 | No  |
| ENSMUSG00000017165 | -1,87E+00 | -3,107637761 | 1,39E+00 | 2,38E-01 | 5,50E-01 | Gast    | 0,27 | No  |
| ENSMUSG00000017167 | 4,03E-02  | 1,664913073  | 6,01E-02 | 8,06E-01 | 9,64E-01 | Cntnap1 | 1,03 | No  |
| ENSMUSG00000017176 | 1,73E-01  | 3,070139454  | 2,37E+00 | 1,24E-01 | 4,40E-01 | Nt5c3b  | 1,13 | No  |
| ENSMUSG00000017188 | -3,98E-02 | 5,077027911  | 2,95E-01 | 5,87E-01 | 8,40E-01 | Coa3    | 0,97 | No  |
| ENSMUSG00000017195 | 2,74E-02  | -3,033621357 | 9,16E-12 | 1,00E+00 | 1,00E+00 | Zpbp2   | 1,02 | No  |
| ENSMUSG00000017204 | 1,59E-01  | -2,107596949 | 4,37E-02 | 8,34E-01 | 9,79E-01 | Gsdma   | 1,12 | No  |
| ENSMUSG00000017210 | 1,11E-01  | 5,3802825    | 2,50E+00 | 1,14E-01 | 4,17E-01 | Med24   | 1,08 | No  |
| ENSMUSG00000017211 | 1,85E+00  | -3,107657832 | 1,35E+00 | 2,46E-01 | 5,50E-01 | Gsdma2  | 3,61 | No  |
| ENSMUSG00000017221 | 6,66E-02  | 6,608312754  | 1,14E+00 | 2,86E-01 | 5,82E-01 | Psm3    | 1,05 | No  |
| ENSMUSG00000017264 | 1,30E-01  | 5,318376094  | 3,35E+00 | 6,71E-02 | 3,26E-01 | Exosc10 | 1,09 | No  |
| ENSMUSG00000017286 | -1,60E-01 | 5,2555518    | 5,06E+00 | 2,45E-02 | 1,72E-01 | Glod4   | 0,90 | No  |
| ENSMUSG00000017288 | 3,93E-02  | 5,58442358   | 3,27E-01 | 5,67E-01 | 8,29E-01 | Vps53   | 1,03 | No  |
| ENSMUSG00000017291 | -2,72E-02 | 7,125796644  | 2,04E-01 | 6,51E-01 | 8,77E-01 | Taok1   | 0,98 | No  |
| ENSMUSG00000017299 | -9,69E-02 | 3,046642409  | 7,58E-01 | 3,84E-01 | 6,85E-01 | Dnttip1 | 0,94 | No  |
| ENSMUSG00000017300 | 6,62E-01  | -2,378255279 | 5,62E-01 | 4,53E-01 | 7,43E-01 | Tnnc2   | 1,58 | No  |
| ENSMUSG00000017307 | -5,42E-02 | 4,388086854  | 4,41E-01 | 5,07E-01 | 7,91E-01 | Acot8   | 0,96 | No  |
| ENSMUSG00000017309 | 3,80E-01  | 3,143510831  | 1,19E+01 | 5,49E-04 | 9,91E-03 | Cd300lg | 1,30 | Yes |
| ENSMUSG00000017314 | -4,92E-01 | 1,299489017  | 7,14E+00 | 7,54E-03 | 7,58E-02 | Mpp2    | 0,71 | No  |
| ENSMUSG00000017344 | -1,94E+00 | -3,107619243 | 1,50E+00 | 2,21E-01 | 5,50E-01 | Vtn     | 0,26 | No  |
| ENSMUSG00000017376 | 1,53E-02  | 4,699941511  | 3,93E-02 | 8,43E-01 | 9,85E-01 | Nlk     | 1,01 | No  |
| ENSMUSG00000017386 | -2,94E-01 | 4,519453301  | 1,29E+01 | 3,27E-04 | 6,50E-03 | Traf4   | 0,82 | Yes |
| ENSMUSG00000017390 | 3,57E-01  | 6,549620732  | 3,23E+01 | 1,32E-08 | 8,94E-07 | Aldoc   | 1,28 | Yes |
| ENSMUSG00000017400 | 3,91E-01  | 6,901974985  | 4,06E+01 | 1,88E-10 | 1,71E-08 | Stac2   | 1,31 | Yes |
| ENSMUSG00000017404 | -1,72E-01 | 5,613396714  | 6,39E+00 | 1,15E-02 | 1,03E-01 | Rpl19   | 0,89 | No  |

|                    |           |              |          |          |          |           |      |     |
|--------------------|-----------|--------------|----------|----------|----------|-----------|------|-----|
| ENSMUSG00000017405 | -1,39E-01 | 3,26586192   | 1,80E+00 | 1,79E-01 | 5,40E-01 | Nek8      | 0,91 | No  |
| ENSMUSG00000017412 | -1,52E-01 | 1,576257417  | 8,24E-01 | 3,64E-01 | 6,65E-01 | Cacnb4    | 0,90 | No  |
| ENSMUSG00000017417 | 5,02E-01  | 4,102044412  | 3,20E+01 | 1,57E-08 | 1,04E-06 | Plxdc1    | 1,42 | Yes |
| ENSMUSG00000017418 | -5,39E-02 | 4,678749122  | 4,72E-01 | 4,92E-01 | 7,78E-01 | Arl5b     | 0,96 | No  |
| ENSMUSG00000017421 | -6,47E-02 | 7,273223893  | 1,17E+00 | 2,80E-01 | 5,76E-01 | Zfp207    | 0,96 | No  |
| ENSMUSG00000017428 | 2,66E-03  | 5,088202631  | 1,33E-03 | 9,71E-01 | 1,00E+00 | Psmid11   | 1,00 | No  |
| ENSMUSG00000017446 | -6,38E-01 | -2,401393438 | 6,23E-01 | 4,30E-01 | 7,23E-01 | C1qtnf1   | 0,64 | No  |
| ENSMUSG00000017453 | -7,38E-02 | -3,033634644 | 2,66E-03 | 9,59E-01 | 1,00E+00 | Pipox     | 0,95 | No  |
| ENSMUSG00000017466 | 2,50E-01  | 6,174837098  | 1,49E+01 | 1,13E-04 | 2,69E-03 | Timp2     | 1,19 | Yes |
| ENSMUSG00000017478 | 5,64E-02  | 5,883393249  | 7,24E-01 | 3,95E-01 | 6,95E-01 | Zc3h18    | 1,04 | No  |
| ENSMUSG00000017485 | 6,32E-02  | 6,946600772  | 1,08E+00 | 2,99E-01 | 5,95E-01 | Top2b     | 1,04 | No  |
| ENSMUSG00000017491 | 1,80E-02  | -0,401402941 | 3,02E-03 | 9,56E-01 | 1,00E+00 | Rarb      | 1,01 | No  |
| ENSMUSG00000017493 | -6,83E-01 | 3,868399472  | 5,67E+01 | 5,09E-14 | 7,15E-12 | Igfbp4    | 0,62 | Yes |
| ENSMUSG00000017499 | 4,17E-01  | 3,926948768  | 2,11E+01 | 4,30E-06 | 1,59E-04 | Cdc6      | 1,34 | Yes |
| ENSMUSG00000017548 | -8,99E-02 | 6,528458164  | 2,07E+00 | 1,51E-01 | 4,92E-01 | Suz12     | 0,94 | No  |
| ENSMUSG00000017550 | 1,81E-01  | 4,504769529  | 5,06E+00 | 2,45E-02 | 1,72E-01 | Atad5     | 1,13 | No  |
| ENSMUSG00000017561 | 1,36E-01  | 5,561565823  | 4,01E+00 | 4,53E-02 | 2,54E-01 | Crlf3     | 1,10 | No  |
| ENSMUSG00000017607 | -5,78E-03 | 5,270669532  | 6,63E-03 | 9,35E-01 | 1,00E+00 | Tns4      | 1,00 | No  |
| ENSMUSG00000017615 | 1,58E-01  | 5,745817668  | 5,49E+00 | 1,91E-02 | 1,47E-01 | Tnfaip1   | 1,12 | No  |
| ENSMUSG00000017631 | 1,58E-01  | 8,335949447  | 7,46E+00 | 6,32E-03 | 6,67E-02 | Abr       | 1,12 | No  |
| ENSMUSG00000017639 | 1,55E-01  | 3,658090774  | 2,61E+00 | 1,06E-01 | 3,99E-01 | Rab11fip4 | 1,11 | No  |
| ENSMUSG00000017652 | -6,08E-01 | 3,7433681    | 4,34E+01 | 4,37E-11 | 4,32E-09 | Cd40      | 0,66 | Yes |
| ENSMUSG00000017664 | 2,31E-01  | 6,446506584  | 1,34E+01 | 2,46E-04 | 5,17E-03 | Slc35c2   | 1,17 | Yes |
| ENSMUSG00000017667 | -4,04E-01 | -0,627498871 | 1,16E+00 | 2,82E-01 | 5,79E-01 | Zfp334    | 0,76 | No  |
| ENSMUSG00000017670 | 2,39E-01  | 6,908219396  | 1,53E+01 | 9,08E-05 | 2,24E-03 | Elmo2     | 1,18 | Yes |
| ENSMUSG00000017677 | 1,32E-01  | 6,828763875  | 4,63E+00 | 3,15E-02 | 2,05E-01 | Wsb1      | 1,10 | No  |
| ENSMUSG00000017679 | 5,93E-02  | 5,445931213  | 7,32E-01 | 3,92E-01 | 6,93E-01 | Ttpal     | 1,04 | No  |
| ENSMUSG00000017686 | 1,57E-02  | 5,356053423  | 4,99E-02 | 8,23E-01 | 9,73E-01 | Rhot1     | 1,01 | No  |
| ENSMUSG00000017692 | -5,47E-01 | -1,574169923 | 8,97E-01 | 3,44E-01 | 6,44E-01 | Rhbdl3    | 0,68 | No  |
| ENSMUSG00000017697 | 2,53E-01  | 1,116349067  | 1,57E+00 | 2,10E-01 | 5,50E-01 | Ada       | 1,19 | No  |
| ENSMUSG00000017707 | 1,48E-02  | 8,821280888  | 6,74E-02 | 7,95E-01 | 9,57E-01 | Serinc3   | 1,01 | No  |
| ENSMUSG00000017713 | 1,21E-01  | 2,369653447  | 8,37E-01 | 3,60E-01 | 6,61E-01 | Tha1      | 1,09 | No  |

|                    |           |              |          |          |          |          |      |     |
|--------------------|-----------|--------------|----------|----------|----------|----------|------|-----|
| ENSMUSG00000017715 | 1,11E-01  | 6,830771095  | 3,26E+00 | 7,12E-02 | 3,38E-01 | Pgs1     | 1,08 | No  |
| ENSMUSG00000017716 | 1,71E-01  | 5,635444215  | 6,35E+00 | 1,17E-02 | 1,05E-01 | Birc5    | 1,13 | No  |
| ENSMUSG00000017718 | -4,87E-01 | 3,81750648   | 2,65E+01 | 2,60E-07 | 1,32E-05 | Afmid    | 0,71 | Yes |
| ENSMUSG00000017720 | -2,27E-02 | -1,697399938 | 1,60E-03 | 9,68E-01 | 1,00E+00 | Trp53tg5 | 0,98 | No  |
| ENSMUSG00000017721 | 4,55E-02  | 6,074103788  | 4,85E-01 | 4,86E-01 | 7,73E-01 | Pigt     | 1,03 | No  |
| ENSMUSG00000017724 | 1,66E-01  | 0,036325249  | 2,98E-01 | 5,85E-01 | 8,39E-01 | Etv4     | 1,12 | No  |
| ENSMUSG00000017734 | -1,08E-01 | 2,722259507  | 7,91E-01 | 3,74E-01 | 6,75E-01 | Dbnidd2  | 0,93 | No  |
| ENSMUSG00000017737 | -5,23E-01 | 1,976056653  | 1,18E+01 | 5,83E-04 | 1,04E-02 | Mmp9     | 0,70 | Yes |
| ENSMUSG00000017740 | -9,06E-01 | -1,448702548 | 3,05E+00 | 8,08E-02 | 3,64E-01 | Slc12a5  | 0,53 | No  |
| ENSMUSG00000017747 | 5,64E-02  | 3,830923175  | 3,69E-01 | 5,44E-01 | 8,12E-01 | Ghdc     | 1,04 | No  |
| ENSMUSG00000017754 | 3,82E-01  | 5,496510236  | 2,97E+01 | 5,12E-08 | 3,04E-06 | Pltp     | 1,30 | Yes |
| ENSMUSG00000017756 | 1,98E-01  | 5,62832693   | 8,45E+00 | 3,64E-03 | 4,42E-02 | Slc12a7  | 1,15 | Yes |
| ENSMUSG00000017760 | 1,70E-01  | 8,930888961  | 8,89E+00 | 2,87E-03 | 3,70E-02 | Ctsa     | 1,13 | Yes |
| ENSMUSG00000017764 | 1,62E-01  | 3,61292046   | 2,76E+00 | 9,65E-02 | 3,88E-01 | Zswim1   | 1,12 | No  |
| ENSMUSG00000017765 | -4,40E-02 | 6,11690323   | 4,60E-01 | 4,98E-01 | 7,83E-01 | Slc12a4  | 0,97 | No  |
| ENSMUSG00000017767 | 3,27E-01  | 0,666608148  | 1,88E+00 | 1,70E-01 | 5,26E-01 | Spata25  | 1,25 | No  |
| ENSMUSG00000017774 | -6,66E-02 | 7,727003036  | 1,29E+00 | 2,57E-01 | 5,50E-01 | Myo1c    | 0,95 | No  |
| ENSMUSG00000017776 | 1,90E-01  | 6,532878629  | 9,28E+00 | 2,32E-03 | 3,15E-02 | Crk      | 1,14 | Yes |
| ENSMUSG00000017778 | -1,57E-01 | 4,56031724   | 3,80E+00 | 5,12E-02 | 2,75E-01 | Cox7c    | 0,90 | No  |
| ENSMUSG00000017781 | 3,71E-02  | 8,467000372  | 4,17E-01 | 5,19E-01 | 7,98E-01 | Pitpna   | 1,03 | No  |
| ENSMUSG00000017801 | 4,41E-02  | 4,757790373  | 3,30E-01 | 5,66E-01 | 8,28E-01 | Mlx      | 1,03 | No  |
| ENSMUSG00000017802 | 9,40E-02  | 6,645952772  | 2,30E+00 | 1,29E-01 | 4,52E-01 | Retreg3  | 1,07 | No  |
| ENSMUSG00000017817 | -1,89E+00 | -3,1076441   | 1,42E+00 | 2,33E-01 | 5,50E-01 | Jph2     | 0,27 | No  |
| ENSMUSG00000017830 | -1,20E-01 | 4,428692688  | 2,21E+00 | 1,37E-01 | 4,67E-01 | Dhx58    | 0,92 | No  |
| ENSMUSG00000017831 | 8,86E-03  | 5,959316418  | 1,81E-02 | 8,93E-01 | 1,00E+00 | Rab5a    | 1,01 | No  |
| ENSMUSG00000017832 | 4,73E-02  | -0,322035108 | 1,89E-02 | 8,91E-01 | 1,00E+00 | Hspb9    | 1,03 | No  |
| ENSMUSG00000017837 | -7,27E-03 | 6,041813078  | 1,25E-02 | 9,11E-01 | 1,00E+00 | Nkiras2  | 0,99 | No  |
| ENSMUSG00000017843 | 3,23E-02  | 7,648763588  | 3,00E-01 | 5,84E-01 | 8,38E-01 | Ppp2r5c  | 1,02 | No  |
| ENSMUSG00000017858 | 8,46E-03  | 4,743997924  | 1,21E-02 | 9,12E-01 | 1,00E+00 | lft52    | 1,01 | No  |
| ENSMUSG00000017861 | 1,14E-01  | 4,18024736   | 1,77E+00 | 1,83E-01 | 5,46E-01 | Mybl2    | 1,08 | No  |
| ENSMUSG00000017868 | -1,86E+00 | -3,033612668 | 1,39E+00 | 2,38E-01 | 5,50E-01 | Sgk2     | 0,28 | No  |
| ENSMUSG00000017897 | 1,86E+00  | -2,96321844  | 1,35E+00 | 2,46E-01 | 5,50E-01 | Eya2     | 3,62 | No  |

|                    |           |              |          |          |          |           |      |     |
|--------------------|-----------|--------------|----------|----------|----------|-----------|------|-----|
| ENSMUSG00000017929 | 2,68E-02  | 7,096334002  | 1,97E-01 | 6,57E-01 | 8,80E-01 | B4galt5   | 1,02 | No  |
| ENSMUSG00000017943 | 5,64E-01  | -2,226312201 | 5,39E-01 | 4,63E-01 | 7,52E-01 | Gdap1l1   | 1,48 | No  |
| ENSMUSG00000017950 | -2,65E+00 | -2,963248364 | 2,80E+00 | 9,42E-02 | 3,84E-01 | Hnf4a     | 0,16 | No  |
| ENSMUSG00000017969 | 6,02E-01  | 2,652656708  | 2,23E+01 | 2,30E-06 | 9,16E-05 | Ptgis     | 1,52 | Yes |
| ENSMUSG00000017978 | 7,96E-01  | -2,770643118 | 5,49E-01 | 4,59E-01 | 7,48E-01 | Cadps2    | 1,74 | No  |
| ENSMUSG00000017999 | 3,43E-02  | 5,308644358  | 2,34E-01 | 6,29E-01 | 8,62E-01 | Ddx27     | 1,02 | No  |
| ENSMUSG00000018001 | -5,46E-02 | 5,876884236  | 6,82E-01 | 4,09E-01 | 7,05E-01 | Cyth3     | 0,96 | No  |
| ENSMUSG00000018008 | 1,83E-01  | 8,430651698  | 1,01E+01 | 1,50E-03 | 2,24E-02 | Cyth4     | 1,13 | Yes |
| ENSMUSG00000018012 | 2,36E-01  | 0,527481419  | 8,98E-01 | 3,43E-01 | 6,44E-01 | Rac3      | 1,18 | No  |
| ENSMUSG00000018040 | 7,63E-02  | 5,487447203  | 1,21E+00 | 2,71E-01 | 5,68E-01 | Rrp7a     | 1,05 | No  |
| ENSMUSG00000018042 | 2,52E-02  | 7,082631501  | 1,74E-01 | 6,76E-01 | 8,91E-01 | Cyb5r3    | 1,02 | No  |
| ENSMUSG00000018068 | 1,76E-01  | 4,680133176  | 5,15E+00 | 2,33E-02 | 1,67E-01 | Ints2     | 1,13 | No  |
| ENSMUSG00000018076 | 4,67E-02  | 7,750672809  | 6,31E-01 | 4,27E-01 | 7,21E-01 | Med13l    | 1,03 | No  |
| ENSMUSG00000018102 | -2,36E-01 | 5,738153478  | 1,23E+01 | 4,47E-04 | 8,38E-03 | Hist1h2bc | 0,85 | Yes |
| ENSMUSG00000018126 | 4,67E-01  | -2,832028547 | 1,71E-01 | 6,79E-01 | 8,93E-01 | Baiap2l2  | 1,38 | No  |
| ENSMUSG00000018143 | 5,09E-02  | 5,716014205  | 5,60E-01 | 4,54E-01 | 7,44E-01 | Mafk      | 1,04 | No  |
| ENSMUSG00000018160 | -2,15E-03 | 6,025887639  | 1,09E-03 | 9,74E-01 | 1,00E+00 | Med1      | 1,00 | No  |
| ENSMUSG00000018166 | 7,90E-02  | 2,232441899  | 3,15E-01 | 5,75E-01 | 8,34E-01 | Erbp3     | 1,06 | No  |
| ENSMUSG00000018167 | 5,27E-02  | 5,183803907  | 5,34E-01 | 4,65E-01 | 7,54E-01 | Stard3    | 1,04 | No  |
| ENSMUSG00000018168 | -2,16E+00 | -2,107565107 | 6,04E+00 | 1,40E-02 | 1,20E-01 | Ikzf3     | 0,22 | No  |
| ENSMUSG00000018169 | 2,23E-03  | 3,56010901   | 5,27E-04 | 9,82E-01 | 1,00E+00 | Mfng      | 1,00 | No  |
| ENSMUSG00000018171 | 7,77E-02  | 6,505502415  | 1,54E+00 | 2,15E-01 | 5,50E-01 | Vmp1      | 1,06 | No  |
| ENSMUSG00000018189 | 5,25E-03  | 4,554186823  | 4,34E-03 | 9,47E-01 | 1,00E+00 | Uchl5     | 1,00 | No  |
| ENSMUSG00000018196 | 3,44E-03  | 4,311120547  | 1,70E-03 | 9,67E-01 | 1,00E+00 | Glx2      | 1,00 | No  |
| ENSMUSG00000018199 | 7,14E-02  | 3,379762951  | 4,91E-01 | 4,83E-01 | 7,71E-01 | Trove2    | 1,05 | No  |
| ENSMUSG00000018209 | -1,75E-01 | 8,248414316  | 9,15E+00 | 2,49E-03 | 3,32E-02 | Stk4      | 0,89 | Yes |
| ENSMUSG00000018217 | 3,24E-02  | 5,993748367  | 2,41E-01 | 6,23E-01 | 8,58E-01 | Pmp22     | 1,02 | No  |
| ENSMUSG00000018238 | -5,96E-01 | -1,205580473 | 1,68E+00 | 1,95E-01 | 5,50E-01 | Gdf9      | 0,66 | No  |
| ENSMUSG00000018239 | -3,97E-03 | 2,859967369  | 1,15E-03 | 9,73E-01 | 1,00E+00 | Zcchc10   | 1,00 | No  |
| ENSMUSG00000018263 | -1,94E+00 | -3,107619243 | 1,50E+00 | 2,21E-01 | 5,50E-01 | Tbx5      | 0,26 | No  |
| ENSMUSG00000018286 | -3,91E-02 | 6,516322492  | 3,89E-01 | 5,33E-01 | 8,06E-01 | Psmb6     | 0,97 | No  |
| ENSMUSG00000018287 | -3,31E-02 | 4,409867548  | 1,64E-01 | 6,85E-01 | 8,97E-01 | Spag7     | 0,98 | No  |

|                    |           |              |          |          |          |               |       |      |     |
|--------------------|-----------|--------------|----------|----------|----------|---------------|-------|------|-----|
| ENSMUSG00000018293 | -3,44E-02 | 10,04001885  | 3,74E-01 | 5,41E-01 | 8,11E-01 | Pfn1          |       | 0,98 | No  |
| ENSMUSG00000018322 | -9,26E-02 | 5,838807171  | 1,94E+00 | 1,64E-01 | 5,15E-01 | Tomm34        |       | 0,94 | No  |
| ENSMUSG00000018326 | 6,59E-02  | 8,157736166  | 1,30E+00 | 2,55E-01 | 5,50E-01 | Ywhab         |       | 1,05 | No  |
| ENSMUSG00000018334 | -2,05E-01 | 5,570892137  | 8,83E+00 | 2,96E-03 | 3,80E-02 | Ksr1          |       | 0,87 | Yes |
| ENSMUSG00000018339 | 6,69E-02  | 5,927023049  | 1,02E+00 | 3,13E-01 | 6,13E-01 | Gpx3          |       | 1,05 | No  |
| ENSMUSG00000018340 | 6,12E-02  | 6,673872337  | 9,72E-01 | 3,24E-01 | 6,25E-01 | Anxa6         |       | 1,04 | No  |
| ENSMUSG00000018341 | -3,09E-01 | 5,991496051  | 2,25E+01 | 2,08E-06 | 8,41E-05 | Il12rb2       |       | 0,81 | Yes |
| ENSMUSG00000018347 | -5,51E-02 | 3,89823813   | 3,65E-01 | 5,46E-01 | 8,14E-01 | Zkscan6       |       | 0,96 | No  |
| ENSMUSG00000018362 | 2,28E-01  | 4,882361364  | 9,04E+00 | 2,65E-03 | 3,47E-02 | Kpna2         |       | 1,17 | Yes |
| ENSMUSG00000018363 | 4,87E-02  | 5,012136387  | 4,35E-01 | 5,10E-01 | 7,93E-01 | Smurf2        |       | 1,03 | No  |
| ENSMUSG00000018372 | -5,81E-02 | 3,039156517  | 2,87E-01 | 5,92E-01 | 8,42E-01 | Cep95         |       | 0,96 | No  |
| ENSMUSG00000018377 | -8,18E-02 | 5,231079393  | 1,31E+00 | 2,52E-01 | 5,50E-01 | Vezf1         |       | 0,94 | No  |
| ENSMUSG00000018378 | -6,34E-01 | 2,470248924  | 2,37E+01 | 1,15E-06 | 5,04E-05 | Cuedc1        |       | 0,64 | Yes |
| ENSMUSG00000018379 | 5,59E-02  | 7,722662678  | 9,07E-01 | 3,41E-01 | 6,42E-01 | Srsf1         |       | 1,04 | No  |
| ENSMUSG00000018381 | -1,25E-01 | 5,406610377  | 3,21E+00 | 7,30E-02 | 3,43E-01 | Abi3          |       | 0,92 | No  |
| ENSMUSG00000018387 | 4,67E-01  | -1,333219928 | 8,51E-01 | 3,56E-01 | 6,58E-01 | Shroom1       |       | 1,38 | No  |
| ENSMUSG00000018395 | 9,98E-02  | 3,70795074   | 1,08E+00 | 2,98E-01 | 5,94E-01 | Kif3a         |       | 1,07 | No  |
| ENSMUSG00000018398 | 1,44E-01  | 6,22782911   | 5,02E+00 | 2,51E-02 | 1,75E-01 |               | 39692 | 1,10 | No  |
| ENSMUSG00000018401 | -3,02E-01 | 8,412806087  | 2,76E+01 | 1,47E-07 | 7,88E-06 | Mttr4         |       | 0,81 | Yes |
| ENSMUSG00000018405 | 4,50E-02  | 3,307982453  | 1,88E-01 | 6,64E-01 | 8,84E-01 | Mrm1          |       | 1,03 | No  |
| ENSMUSG00000018411 | -5,62E-02 | -2,831969586 | 2,13E-03 | 9,63E-01 | 1,00E+00 | Mapt          |       | 0,96 | No  |
| ENSMUSG00000018412 | -7,92E-02 | 6,563383727  | 1,61E+00 | 2,04E-01 | 5,50E-01 | Kansl1        |       | 0,95 | No  |
| ENSMUSG00000018415 | 1,61E-02  | 4,768844338  | 4,48E-02 | 8,32E-01 | 9,78E-01 | Gid4          |       | 1,01 | No  |
| ENSMUSG00000018417 | -1,73E-01 | 4,100661565  | 3,95E+00 | 4,67E-02 | 2,58E-01 | Myo1b         |       | 0,89 | No  |
| ENSMUSG00000018425 | 2,51E-02  | 4,42253939   | 9,44E-02 | 7,59E-01 | 9,36E-01 | Dhx40         |       | 1,02 | No  |
| ENSMUSG00000018427 | -1,35E-01 | 4,651527322  | 3,03E+00 | 8,16E-02 | 3,67E-01 | Ypel2         |       | 0,91 | No  |
| ENSMUSG00000018428 | 1,60E-01  | 4,124068185  | 3,44E+00 | 6,37E-02 | 3,15E-01 | Akap1         |       | 1,12 | No  |
| ENSMUSG00000018433 | 1,25E-01  | 4,510821909  | 2,41E+00 | 1,21E-01 | 4,33E-01 | Nol11         |       | 1,09 | No  |
| ENSMUSG00000018442 | -5,17E-02 | 5,938870204  | 6,14E-01 | 4,33E-01 | 7,27E-01 | Derl2         |       | 0,96 | No  |
| ENSMUSG00000018446 | -3,66E-02 | 6,034674674  | 3,15E-01 | 5,75E-01 | 8,34E-01 | C1qbp         |       | 0,97 | No  |
| ENSMUSG00000018449 | -2,28E-01 | 4,407139619  | 7,98E+00 | 4,74E-03 | 5,37E-02 | Rpain         |       | 0,85 | No  |
| ENSMUSG00000018451 | -1,22E+00 | -2,268042388 | 1,43E+00 | 2,32E-01 | 5,50E-01 | 6330403K07Rik |       | 0,43 | No  |

|                    |           |              |          |          |          |               |      |     |
|--------------------|-----------|--------------|----------|----------|----------|---------------|------|-----|
| ENSMUSG00000018459 | 6,41E-01  | -0,697456301 | 2,92E+00 | 8,74E-02 | 3,78E-01 | Slc13a3       | 1,56 | No  |
| ENSMUSG00000018470 | 2,11E-02  | -1,289528693 | 1,62E-03 | 9,68E-01 | 1,00E+00 | Kcnab3        | 1,01 | No  |
| ENSMUSG00000018474 | -2,71E-01 | 5,79902538   | 1,64E+01 | 5,07E-05 | 1,37E-03 | Chd3          | 0,83 | Yes |
| ENSMUSG00000018476 | -2,33E-01 | 5,895699398  | 1,21E+01 | 5,07E-04 | 9,27E-03 | Kdm6b         | 0,85 | Yes |
| ENSMUSG00000018481 | 8,31E-02  | 5,837548689  | 1,55E+00 | 2,14E-01 | 5,50E-01 | Appbp2        | 1,06 | No  |
| ENSMUSG00000018486 | -1,31E+00 | -2,896141453 | 1,07E+00 | 3,01E-01 | 5,98E-01 | Wnt9b         | 0,40 | No  |
| ENSMUSG00000018500 | -2,20E-02 | 3,889740986  | 5,77E-02 | 8,10E-01 | 9,66E-01 | Adora2b       | 0,98 | No  |
| ENSMUSG00000018501 | -1,42E-02 | 7,69376433   | 5,84E-02 | 8,09E-01 | 9,65E-01 | Ncor1         | 0,99 | No  |
| ENSMUSG00000018507 | 1,81E-01  | 8,157872804  | 9,72E+00 | 1,82E-03 | 2,59E-02 | Trpv2         | 1,13 | Yes |
| ENSMUSG00000018509 | 3,34E-01  | 2,430133576  | 6,39E+00 | 1,15E-02 | 1,03E-01 | Cenpv         | 1,26 | No  |
| ENSMUSG00000018537 | -7,16E-02 | 2,790302766  | 3,79E-01 | 5,38E-01 | 8,09E-01 | Pcgf2         | 0,95 | No  |
| ENSMUSG00000018541 | -4,31E-02 | 4,756713808  | 3,12E-01 | 5,76E-01 | 8,35E-01 | Cwc25         | 0,97 | No  |
| ENSMUSG00000018543 | -7,54E-02 | -2,355540117 | 6,49E-03 | 9,36E-01 | 1,00E+00 | 1700001P01Rik | 0,95 | No  |
| ENSMUSG00000018547 | 1,81E-01  | 6,464981635  | 8,34E+00 | 3,87E-03 | 4,62E-02 | Pip4k2b       | 1,13 | Yes |
| ENSMUSG00000018548 | 1,66E-01  | 5,110980999  | 5,15E+00 | 2,32E-02 | 1,67E-01 | Trim37        | 1,12 | No  |
| ENSMUSG00000018554 | -4,57E-01 | -2,497558768 | 2,13E-01 | 6,44E-01 | 8,72E-01 | Ybx2          | 0,73 | No  |
| ENSMUSG00000018559 | 2,88E-02  | 6,704849474  | 2,16E-01 | 6,42E-01 | 8,71E-01 | Ctdnep1       | 1,02 | No  |
| ENSMUSG00000018565 | 1,40E-02  | 5,406544319  | 4,04E-02 | 8,41E-01 | 9,84E-01 | Elp5          | 1,01 | No  |
| ENSMUSG00000018566 | -1,20E+00 | -2,355564997 | 1,87E+00 | 1,71E-01 | 5,27E-01 | Slc2a4        | 0,43 | No  |
| ENSMUSG00000018567 | -4,38E-02 | 8,624459861  | 5,84E-01 | 4,45E-01 | 7,36E-01 | Gabarap       | 0,97 | No  |
| ENSMUSG00000018569 | -1,30E+00 | -1,997894275 | 2,90E+00 | 8,87E-02 | 3,79E-01 | Cldn7         | 0,41 | No  |
| ENSMUSG00000018570 | 8,47E-03  | -0,711789403 | 5,48E-04 | 9,81E-01 | 1,00E+00 | 2810408A11Rik | 1,01 | No  |
| ENSMUSG00000018572 | 1,15E-01  | 5,640543812  | 2,90E+00 | 8,87E-02 | 3,79E-01 | Phf23         | 1,08 | No  |
| ENSMUSG00000018574 | -4,56E-02 | 4,655151239  | 3,37E-01 | 5,61E-01 | 8,24E-01 | Acadvl        | 0,97 | No  |
| ENSMUSG00000018581 | 3,55E-01  | 1,443441174  | 3,71E+00 | 5,41E-02 | 2,84E-01 | Dnah11        | 1,28 | No  |
| ENSMUSG00000018583 | -4,11E-03 | 7,063101666  | 4,62E-03 | 9,46E-01 | 1,00E+00 | G3bp1         | 1,00 | No  |
| ENSMUSG00000018585 | -1,67E-01 | 6,73085826   | 7,32E+00 | 6,84E-03 | 7,05E-02 | Atox1         | 0,89 | No  |
| ENSMUSG00000018593 | -1,16E+00 | -0,586963301 | 9,12E+00 | 2,53E-03 | 3,36E-02 | Sparc         | 0,45 | Yes |
| ENSMUSG00000018599 | -7,44E-02 | 3,981178218  | 7,08E-01 | 4,00E-01 | 6,99E-01 | Mief2         | 0,95 | No  |
| ENSMUSG00000018604 | -2,67E+00 | -2,472887592 | 4,48E+00 | 3,43E-02 | 2,18E-01 | Tbx3          | 0,16 | No  |
| ENSMUSG00000018620 | 4,65E-01  | -2,711737645 | 1,69E-01 | 6,81E-01 | 8,94E-01 | Mmp20         | 1,38 | No  |
| ENSMUSG00000018623 | -1,89E+00 | -2,522622711 | 4,17E+00 | 4,11E-02 | 2,40E-01 | Mmp7          | 0,27 | No  |

|                    |           |              |          |          |          |          |      |     |
|--------------------|-----------|--------------|----------|----------|----------|----------|------|-----|
| ENSMUSG00000018648 | -1,10E+00 | 0,010981337  | 1,47E+01 | 1,27E-04 | 2,96E-03 | Dusp14   | 0,47 | Yes |
| ENSMUSG00000018651 | 1,97E-01  | 2,492602546  | 2,34E+00 | 1,26E-01 | 4,45E-01 | Tada2a   | 1,15 | No  |
| ENSMUSG00000018654 | -3,94E-02 | 7,023228554  | 4,23E-01 | 5,15E-01 | 7,97E-01 | Ikzf1    | 0,97 | No  |
| ENSMUSG00000018659 | 2,82E-02  | 4,640470586  | 1,29E-01 | 7,20E-01 | 9,15E-01 | Pnpo     | 1,02 | No  |
| ENSMUSG00000018661 | 3,87E-02  | 5,758414617  | 3,33E-01 | 5,64E-01 | 8,26E-01 | Cog1     | 1,03 | No  |
| ENSMUSG00000018666 | 3,45E-02  | 5,207570198  | 2,32E-01 | 6,30E-01 | 8,62E-01 | Cbx1     | 1,02 | No  |
| ENSMUSG00000018669 | -2,29E-02 | 5,00626346   | 9,68E-02 | 7,56E-01 | 9,34E-01 | Cdk5rap3 | 0,98 | No  |
| ENSMUSG00000018672 | 3,14E-02  | 1,341396383  | 2,72E-02 | 8,69E-01 | 1,00E+00 | Copz2    | 1,02 | No  |
| ENSMUSG00000018677 | 9,78E-02  | 6,555801029  | 2,44E+00 | 1,18E-01 | 4,27E-01 | Slc25a39 | 1,07 | No  |
| ENSMUSG00000018678 | -8,88E-03 | 4,916434261  | 1,38E-02 | 9,06E-01 | 1,00E+00 | Sp2      | 0,99 | No  |
| ENSMUSG00000018697 | 1,72E-01  | 3,951206522  | 3,63E+00 | 5,66E-02 | 2,93E-01 | Aatf     | 1,13 | No  |
| ENSMUSG00000018698 | -1,70E+00 | -2,770623743 | 2,01E+00 | 1,57E-01 | 5,02E-01 | Lhx1     | 0,31 | No  |
| ENSMUSG00000018707 | 6,80E-02  | 9,389282123  | 1,45E+00 | 2,29E-01 | 5,50E-01 | Dync1h1  | 1,05 | No  |
| ENSMUSG00000018727 | -2,29E-01 | -1,015816059 | 3,23E-01 | 5,70E-01 | 8,31E-01 | Cpsf4l   | 0,85 | No  |
| ENSMUSG00000018733 | 4,90E-02  | 3,027401132  | 1,92E-01 | 6,61E-01 | 8,82E-01 | Pex12    | 1,03 | No  |
| ENSMUSG00000018736 | -2,87E-02 | 6,547817613  | 2,10E-01 | 6,47E-01 | 8,74E-01 | Ndel1    | 0,98 | No  |
| ENSMUSG00000018740 | -1,73E-01 | 2,785917748  | 2,09E+00 | 1,48E-01 | 4,87E-01 | Slc25a35 | 0,89 | No  |
| ENSMUSG00000018750 | -2,09E-01 | 4,429039148  | 6,67E+00 | 9,78E-03 | 9,18E-02 | Zbtb4    | 0,87 | No  |
| ENSMUSG00000018752 | 1,97E-01  | 5,538916252  | 8,13E+00 | 4,35E-03 | 5,03E-02 | Tnfsfm13 | 1,15 | No  |
| ENSMUSG00000018761 | -6,48E-02 | 6,174207983  | 1,01E+00 | 3,14E-01 | 6,14E-01 | Mpdu1    | 0,96 | No  |
| ENSMUSG00000018765 | 2,17E-02  | 5,803220034  | 1,06E-01 | 7,45E-01 | 9,29E-01 | Fxr2     | 1,02 | No  |
| ENSMUSG00000018770 | -2,24E-02 | 7,731633033  | 1,45E-01 | 7,03E-01 | 9,06E-01 | Atp5g3   | 0,98 | No  |
| ENSMUSG00000018774 | 1,69E-01  | 8,501607637  | 8,64E+00 | 3,29E-03 | 4,11E-02 | Cd68     | 1,12 | Yes |
| ENSMUSG00000018776 | 2,89E-01  | -2,497531182 | 8,50E-02 | 7,71E-01 | 9,42E-01 | Slc35g3  | 1,22 | No  |
| ENSMUSG00000018796 | -7,35E-02 | 5,67582888   | 1,18E+00 | 2,78E-01 | 5,74E-01 | Acsl1    | 0,95 | No  |
| ENSMUSG00000018800 | -4,00E-01 | 1,644470472  | 5,98E+00 | 1,45E-02 | 1,23E-01 | Abca5    | 0,76 | No  |
| ENSMUSG00000018809 | -1,09E-01 | 3,324747823  | 1,09E+00 | 2,96E-01 | 5,92E-01 | Smyd4    | 0,93 | No  |
| ENSMUSG00000018819 | -1,60E-01 | 9,207902944  | 7,99E+00 | 4,71E-03 | 5,34E-02 | Lsp1     | 0,89 | No  |
| ENSMUSG00000018820 | 1,09E-01  | 5,412704886  | 2,44E+00 | 1,18E-01 | 4,27E-01 | Zfyve27  | 1,08 | No  |
| ENSMUSG00000018821 | -4,28E-01 | 3,922208546  | 2,30E+01 | 1,58E-06 | 6,66E-05 | Avpi1    | 0,74 | Yes |
| ENSMUSG00000018822 | -4,12E+00 | -2,548189487 | 8,62E+00 | 3,32E-03 | 4,14E-02 | Sfrp5    | 0,06 | Yes |
| ENSMUSG00000018830 | -4,04E-01 | -0,980405252 | 8,56E-01 | 3,55E-01 | 6,56E-01 | Myh11    | 0,76 | No  |



|                    |           |              |           |          |          |         |      |     |
|--------------------|-----------|--------------|-----------|----------|----------|---------|------|-----|
| ENSMUSG00000018841 | -9,80E-02 | 4,383462072  | 1,45E+00  | 2,29E-01 | 5,50E-01 | Rad51d  | 0,93 | No  |
| ENSMUSG00000018844 | -5,44E-01 | -1,896004924 | 6,81E-01  | 4,09E-01 | 7,06E-01 | Fndc8   | 0,69 | No  |
| ENSMUSG00000018845 | -1,11E+00 | -2,472911154 | 9,33E-01  | 3,34E-01 | 6,35E-01 | Unc45b  | 0,46 | No  |
| ENSMUSG00000018846 | 1,91E-01  | 6,54600427   | 9,39E+00  | 2,19E-03 | 3,00E-02 | Pank3   | 1,14 | Yes |
| ENSMUSG00000018848 | 4,95E-02  | 5,818224827  | 5,51E-01  | 4,58E-01 | 7,47E-01 | Rars    | 1,03 | No  |
| ENSMUSG00000018849 | 1,55E-01  | -1,963198979 | 4,16E-02  | 8,38E-01 | 9,82E-01 | Wwc1    | 1,11 | No  |
| ENSMUSG00000018858 | 5,95E-02  | 3,570181859  | 3,69E-01  | 5,43E-01 | 8,12E-01 | Mrpl58  | 1,04 | No  |
| ENSMUSG00000018861 | -1,34E-01 | 2,996614883  | 1,45E+00  | 2,29E-01 | 5,50E-01 | Fdxr    | 0,91 | No  |
| ENSMUSG00000018865 | -5,24E-02 | -2,963220811 | 1,25E-03  | 9,72E-01 | 1,00E+00 | Sult4a1 | 0,96 | No  |
| ENSMUSG00000018868 | 3,14E-02  | -3,107617333 | -7,69E-10 | 1,00E+00 | 1,00E+00 | Pnpla5  | 1,02 | No  |
| ENSMUSG00000018882 | -2,59E-01 | 4,965876231  | 1,22E+01  | 4,85E-04 | 8,94E-03 | Mrpl45  | 0,84 | Yes |
| ENSMUSG00000018899 | -3,47E-01 | 4,952194752  | 2,22E+01  | 2,43E-06 | 9,66E-05 | Irf1    | 0,79 | Yes |
| ENSMUSG00000018900 | 6,54E-02  | 4,294132137  | 6,16E-01  | 4,33E-01 | 7,26E-01 | Slc22a5 | 1,05 | No  |
| ENSMUSG00000018906 | 8,67E-01  | 0,228799402  | 9,79E+00  | 1,75E-03 | 2,52E-02 | P4ha2   | 1,82 | Yes |
| ENSMUSG00000018907 | 4,85E-01  | -2,146158244 | 3,19E-01  | 5,72E-01 | 8,32E-01 | Alox12e | 1,40 | No  |
| ENSMUSG00000018909 | -4,44E-02 | 8,748639064  | 6,04E-01  | 4,37E-01 | 7,30E-01 | Arrb1   | 0,97 | No  |
| ENSMUSG00000018919 | -3,97E-01 | 0,451993614  | 2,69E+00  | 1,01E-01 | 3,93E-01 | Tm4sf5  | 0,76 | No  |
| ENSMUSG00000018920 | -1,32E-01 | 7,859675133  | 5,13E+00  | 2,35E-02 | 1,68E-01 | Cxcl16  | 0,91 | No  |
| ENSMUSG00000018921 | 2,50E-01  | 5,330510782  | 1,25E+01  | 4,06E-04 | 7,71E-03 | Pelp1   | 1,19 | Yes |
| ENSMUSG00000018923 | -3,72E-02 | 4,562578575  | 2,23E-01  | 6,36E-01 | 8,67E-01 | Med11   | 0,97 | No  |
| ENSMUSG00000018924 | 7,38E-01  | 4,489271878  | 7,83E+01  | 8,99E-19 | 1,86E-16 | Alox15  | 1,67 | Yes |
| ENSMUSG00000018925 | -8,17E-01 | 2,617927696  | 4,45E+01  | 2,54E-11 | 2,58E-09 | Heatr9  | 0,57 | Yes |
| ENSMUSG00000018927 | 4,90E-02  | 12,49308878  | 7,75E-01  | 3,79E-01 | 6,79E-01 | Ccl6    | 1,03 | No  |
| ENSMUSG00000018930 | -3,19E-02 | 6,467882932  | 2,50E-01  | 6,17E-01 | 8,55E-01 | Ccl4    | 0,98 | No  |
| ENSMUSG00000018931 | 2,41E-01  | 5,268570085  | 1,15E+01  | 6,80E-04 | 1,18E-02 | Natd1   | 1,18 | Yes |
| ENSMUSG00000018932 | 1,06E-01  | 6,746530181  | 2,92E+00  | 8,73E-02 | 3,78E-01 | Map2k3  | 1,08 | No  |
| ENSMUSG00000018965 | 2,62E-02  | 8,644896601  | 2,10E-01  | 6,47E-01 | 8,74E-01 | Ywhah   | 1,02 | No  |
| ENSMUSG00000018974 | 6,13E-02  | 5,732399936  | 8,27E-01  | 3,63E-01 | 6,64E-01 | Sart3   | 1,04 | No  |
| ENSMUSG00000018983 | 5,49E-01  | 5,820213359  | 6,69E+01  | 2,87E-16 | 4,91E-14 | E2f2    | 1,46 | Yes |
| ENSMUSG00000018986 | 2,88E-01  | 3,723955921  | 9,36E+00  | 2,22E-03 | 3,04E-02 | Sfn3    | 1,22 | Yes |
| ENSMUSG00000018995 | 1,73E-02  | 2,601919059  | 1,81E-02  | 8,93E-01 | 1,00E+00 | Nars2   | 1,01 | No  |
| ENSMUSG00000018999 | -5,36E-02 | 6,01987623   | 6,82E-01  | 4,09E-01 | 7,05E-01 | Slc35b4 | 0,96 | No  |

|                    |           |              |          |          |          |          |      |     |
|--------------------|-----------|--------------|----------|----------|----------|----------|------|-----|
| ENSMUSG00000019027 | -6,29E-01 | -1,655154634 | 1,23E+00 | 2,68E-01 | 5,64E-01 | Dnah1    | 0,65 | No  |
| ENSMUSG00000019039 | -1,22E-01 | 5,093054515  | 2,83E+00 | 9,28E-02 | 3,83E-01 | Dalrd3   | 0,92 | No  |
| ENSMUSG00000019054 | -7,49E-02 | 5,643384832  | 1,22E+00 | 2,70E-01 | 5,67E-01 | Fis1     | 0,95 | No  |
| ENSMUSG00000019055 | 2,45E-01  | 5,993677373  | 1,37E+01 | 2,11E-04 | 4,55E-03 | Plod1    | 1,18 | Yes |
| ENSMUSG00000019066 | 1,60E-01  | 6,805194842  | 6,80E+00 | 9,13E-03 | 8,72E-02 | Rab3d    | 1,12 | No  |
| ENSMUSG00000019080 | 1,34E-01  | 2,723431303  | 1,23E+00 | 2,68E-01 | 5,65E-01 | Mfsd3    | 1,10 | No  |
| ENSMUSG00000019082 | 2,91E-01  | 4,953681439  | 1,54E+01 | 8,84E-05 | 2,19E-03 | Slc25a22 | 1,22 | Yes |
| ENSMUSG00000019102 | 3,04E-01  | 0,251501641  | 1,36E+00 | 2,44E-01 | 5,50E-01 | Aldh3a1  | 1,23 | No  |
| ENSMUSG00000019122 | -5,16E-02 | 10,19076642  | 8,43E-01 | 3,59E-01 | 6,60E-01 | Ccl9     | 0,96 | No  |
| ENSMUSG00000019132 | 2,79E-03  | 8,724553184  | 2,38E-03 | 9,61E-01 | 1,00E+00 | BC005537 | 1,00 | No  |
| ENSMUSG00000019139 | 7,44E-02  | 6,656188299  | 1,43E+00 | 2,31E-01 | 5,50E-01 | Isyna1   | 1,05 | No  |
| ENSMUSG00000019143 | 1,67E-02  | 4,719094789  | 4,72E-02 | 8,28E-01 | 9,76E-01 | Hars2    | 1,01 | No  |
| ENSMUSG00000019158 | 8,42E-02  | 4,937867456  | 1,26E+00 | 2,62E-01 | 5,56E-01 | Tmem160  | 1,06 | No  |
| ENSMUSG00000019173 | -1,43E-03 | 8,14539885   | 6,05E-04 | 9,80E-01 | 1,00E+00 | Rab5c    | 1,00 | No  |
| ENSMUSG00000019178 | -8,21E-01 | -2,963266074 | 3,67E-01 | 5,45E-01 | 8,13E-01 | Stylx1   | 0,57 | No  |
| ENSMUSG00000019179 | 2,79E-02  | 7,233843597  | 2,17E-01 | 6,42E-01 | 8,71E-01 | Mdh2     | 1,02 | No  |
| ENSMUSG00000019188 | 1,82E-01  | 6,819155689  | 8,79E+00 | 3,03E-03 | 3,85E-02 | H13      | 1,13 | Yes |
| ENSMUSG00000019189 | 4,58E-02  | 6,383114285  | 5,24E-01 | 4,69E-01 | 7,57E-01 | Rnf145   | 1,03 | No  |
| ENSMUSG00000019194 | 1,43E-01  | 4,156929072  | 2,77E+00 | 9,61E-02 | 3,87E-01 | Scn1b    | 1,10 | No  |
| ENSMUSG00000019210 | 8,51E-02  | 6,964575532  | 1,95E+00 | 1,62E-01 | 5,12E-01 | Atp6v1e1 | 1,06 | No  |
| ENSMUSG00000019214 | 3,40E-01  | 3,668283216  | 1,26E+01 | 3,87E-04 | 7,45E-03 | Chtf18   | 1,27 | Yes |
| ENSMUSG00000019230 | 2,45E-01  | -1,863738102 | 1,38E-01 | 7,10E-01 | 9,09E-01 | Lhx9     | 1,18 | No  |
| ENSMUSG00000019232 | -2,71E+00 | -3,033620915 | 2,92E+00 | 8,75E-02 | 3,78E-01 | Etnppl   | 0,15 | No  |
| ENSMUSG00000019235 | 8,26E-02  | 1,101736516  | 1,73E-01 | 6,78E-01 | 8,92E-01 | Rps6kl1  | 1,06 | No  |
| ENSMUSG00000019254 | 7,24E-02  | 6,820863048  | 1,39E+00 | 2,38E-01 | 5,50E-01 | Ppp1r12c | 1,05 | No  |
| ENSMUSG00000019256 | -7,57E-02 | 7,390753     | 1,57E+00 | 2,10E-01 | 5,50E-01 | Ahr      | 0,95 | No  |
| ENSMUSG00000019261 | 2,42E-01  | 6,066107612  | 1,38E+01 | 2,02E-04 | 4,39E-03 | Map1s    | 1,18 | Yes |
| ENSMUSG00000019278 | 7,07E-01  | -2,963242697 | 2,70E-01 | 6,03E-01 | 8,48E-01 | Dpep1    | 1,63 | No  |
| ENSMUSG00000019295 | 1,71E-01  | 4,924702304  | 5,25E+00 | 2,19E-02 | 1,60E-01 | Tmem129  | 1,13 | No  |
| ENSMUSG00000019297 | 1,23E-01  | 5,791896806  | 3,39E+00 | 6,57E-02 | 3,22E-01 | Nop9     | 1,09 | No  |
| ENSMUSG00000019301 | -2,23E-01 | -1,28961097  | 2,32E-01 | 6,30E-01 | 8,62E-01 | Hsd17b1  | 0,86 | No  |
| ENSMUSG00000019302 | 1,95E-01  | 8,433217044  | 1,14E+01 | 7,18E-04 | 1,23E-02 | Atp6v0a1 | 1,14 | Yes |

|                    |           |              |          |          |          |            |      |     |
|--------------------|-----------|--------------|----------|----------|----------|------------|------|-----|
| ENSMUSG00000019303 | 1,89E-02  | 2,557149713  | 2,25E-02 | 8,81E-01 | 1,00E+00 | Psmc3ip    | 1,01 | No  |
| ENSMUSG00000019312 | -1,02E+00 | -1,77050039  | 2,67E+00 | 1,02E-01 | 3,94E-01 | Grb7       | 0,49 | No  |
| ENSMUSG00000019320 | -3,09E-01 | 0,694364057  | 1,93E+00 | 1,65E-01 | 5,18E-01 | Noxo1      | 0,81 | No  |
| ENSMUSG00000019326 | -1,84E+00 | -2,401297759 | 3,95E+00 | 4,68E-02 | 2,58E-01 | Aoc3       | 0,28 | No  |
| ENSMUSG00000019338 | -2,12E-02 | 4,579206373  | 7,22E-02 | 7,88E-01 | 9,53E-01 | Zfp687     | 0,99 | No  |
| ENSMUSG00000019362 | 3,95E-02  | 5,987236278  | 3,62E-01 | 5,48E-01 | 8,15E-01 | D8Ertd738e | 1,03 | No  |
| ENSMUSG00000019368 | -4,75E-02 | -2,10760978  | 4,18E-03 | 9,48E-01 | 1,00E+00 | Sec14l4    | 0,97 | No  |
| ENSMUSG00000019370 | -1,11E-02 | 7,995629254  | 3,62E-02 | 8,49E-01 | 9,89E-01 | Calm3      | 0,99 | No  |
| ENSMUSG00000019373 | -1,78E-02 | 4,764887449  | 5,34E-02 | 8,17E-01 | 9,70E-01 | Cops3      | 0,99 | No  |
| ENSMUSG00000019428 | -3,01E-02 | 7,680593303  | 2,62E-01 | 6,09E-01 | 8,51E-01 | Fkbp8      | 0,98 | No  |
| ENSMUSG00000019429 | -3,88E-03 | -3,03362684  | 4,02E-12 | 1,00E+00 | 1,00E+00 | Ffar3      | 1,00 | No  |
| ENSMUSG00000019432 | -2,61E-02 | 7,750437592  | 1,98E-01 | 6,56E-01 | 8,80E-01 | Ddx39b     | 0,98 | No  |
| ENSMUSG00000019433 | 7,42E-02  | 6,507384999  | 1,40E+00 | 2,37E-01 | 5,50E-01 | Gipc1      | 1,05 | No  |
| ENSMUSG00000019437 | -1,01E-01 | 3,61241304   | 1,11E+00 | 2,92E-01 | 5,87E-01 | Tlcd1      | 0,93 | No  |
| ENSMUSG00000019461 | 7,32E-02  | 5,083995661  | 9,85E-01 | 3,21E-01 | 6,21E-01 | Plscr3     | 1,05 | No  |
| ENSMUSG00000019464 | 3,65E-02  | 6,837308647  | 3,55E-01 | 5,51E-01 | 8,17E-01 | Ptger1     | 1,03 | No  |
| ENSMUSG00000019467 | -2,71E-01 | 1,536788976  | 2,64E+00 | 1,04E-01 | 3,97E-01 | Arhgef25   | 0,83 | No  |
| ENSMUSG00000019470 | -1,22E-01 | 5,880276741  | 3,41E+00 | 6,47E-02 | 3,19E-01 | Xab2       | 0,92 | No  |
| ENSMUSG00000019471 | -1,11E-01 | 7,654201982  | 3,56E+00 | 5,92E-02 | 3,01E-01 | Cdc37      | 0,93 | No  |
| ENSMUSG00000019478 | 1,41E-01  | 0,551274461  | 3,10E-01 | 5,78E-01 | 8,35E-01 | Rab4a      | 1,10 | No  |
| ENSMUSG00000019487 | -9,21E-02 | 5,311416033  | 1,72E+00 | 1,90E-01 | 5,50E-01 | Trip10     | 0,94 | No  |
| ENSMUSG00000019489 | -1,00E+00 | -0,01572308  | 1,31E+01 | 2,99E-04 | 6,05E-03 | Cd70       | 0,50 | Yes |
| ENSMUSG00000019494 | 2,84E-02  | 5,274970164  | 1,58E-01 | 6,91E-01 | 9,00E-01 | Cops6      | 1,02 | No  |
| ENSMUSG00000019505 | 1,38E-02  | 10,00695319  | 6,00E-02 | 8,06E-01 | 9,64E-01 | Ubb        | 1,01 | No  |
| ENSMUSG00000019518 | 2,63E-02  | 4,926843452  | 1,25E-01 | 7,23E-01 | 9,17E-01 | Ap4m1      | 1,02 | No  |
| ENSMUSG00000019528 | -4,54E-01 | 7,992027354  | 6,08E+01 | 6,22E-15 | 9,63E-13 | Gyg        | 0,73 | Yes |
| ENSMUSG00000019539 | 3,27E-01  | 1,957231875  | 4,40E+00 | 3,59E-02 | 2,25E-01 | Rcn3       | 1,25 | No  |
| ENSMUSG00000019564 | -3,06E-02 | 5,245476317  | 1,86E-01 | 6,67E-01 | 8,86E-01 | Arid3a     | 0,98 | No  |
| ENSMUSG00000019577 | -3,82E-01 | -1,355578555 | 6,42E-01 | 4,23E-01 | 7,18E-01 | Pdk4       | 0,77 | No  |
| ENSMUSG00000019578 | 4,25E-02  | 5,73447136   | 4,00E-01 | 5,27E-01 | 8,04E-01 | Ubxn6      | 1,03 | No  |
| ENSMUSG00000019579 | 2,97E-02  | 5,487415307  | 1,83E-01 | 6,69E-01 | 8,87E-01 | Mydgf      | 1,02 | No  |
| ENSMUSG00000019590 | 2,14E-01  | 4,288691513  | 6,48E+00 | 1,09E-02 | 9,95E-02 | Cyb561     | 1,16 | No  |

|                    |           |              |          |          |          |               |      |     |
|--------------------|-----------|--------------|----------|----------|----------|---------------|------|-----|
| ENSMUSG00000019647 | 3,18E-02  | -0,333238422 | 9,67E-03 | 9,22E-01 | 1,00E+00 | Sema6a        | 1,02 | No  |
| ENSMUSG00000019659 | -6,33E-02 | 5,595202745  | 8,62E-01 | 3,53E-01 | 6,54E-01 | Ccdc12        | 0,96 | No  |
| ENSMUSG00000019689 | 1,03E-01  | 2,984850922  | 8,35E-01 | 3,61E-01 | 6,62E-01 | Fmc1          | 1,07 | No  |
| ENSMUSG00000019699 | -3,90E-02 | 5,83105757   | 3,46E-01 | 5,56E-01 | 8,21E-01 | Akt3          | 0,97 | No  |
| ENSMUSG00000019710 | -1,83E-01 | 5,613544155  | 7,22E+00 | 7,19E-03 | 7,33E-02 | Mrpl24        | 0,88 | No  |
| ENSMUSG00000019715 | 9,11E-03  | 5,012175615  | 1,51E-02 | 9,02E-01 | 1,00E+00 | Gle1          | 1,01 | No  |
| ENSMUSG00000019718 | 4,54E-01  | -0,912587034 | 9,70E-01 | 3,25E-01 | 6,25E-01 | L3hypdh       | 1,37 | No  |
| ENSMUSG00000019726 | -1,12E-01 | 6,557425716  | 3,18E+00 | 7,46E-02 | 3,47E-01 | Lyst          | 0,93 | No  |
| ENSMUSG00000019731 | 1,11E-01  | 7,041162014  | 3,34E+00 | 6,77E-02 | 3,28E-01 | Slc35e1       | 1,08 | No  |
| ENSMUSG00000019732 | 2,84E-01  | -1,070096199 | 3,84E-01 | 5,35E-01 | 8,08E-01 | Calr3         | 1,22 | No  |
| ENSMUSG00000019734 | -9,15E-02 | 1,643696084  | 3,05E-01 | 5,81E-01 | 8,37E-01 | Tmc4          | 0,94 | No  |
| ENSMUSG00000019737 | -3,20E-01 | 0,337803695  | 1,63E+00 | 2,02E-01 | 5,50E-01 | Syne4         | 0,80 | No  |
| ENSMUSG00000019738 | -2,25E-01 | 2,120484569  | 2,32E+00 | 1,28E-01 | 4,49E-01 | Polr2i        | 0,86 | No  |
| ENSMUSG00000019761 | -4,63E-01 | -0,1169109   | 2,26E+00 | 1,33E-01 | 4,59E-01 | Krt10         | 0,73 | No  |
| ENSMUSG00000019763 | 1,31E-01  | 3,631609062  | 1,88E+00 | 1,71E-01 | 5,27E-01 | Rmnd1         | 1,10 | No  |
| ENSMUSG00000019767 | 2,07E-01  | -1,205801151 | 1,65E-01 | 6,84E-01 | 8,96E-01 | Ccdc170       | 1,15 | No  |
| ENSMUSG00000019768 | 1,67E-01  | 4,978170852  | 5,02E+00 | 2,50E-02 | 1,75E-01 | Esr1          | 1,12 | No  |
| ENSMUSG00000019772 | -1,94E+00 | -3,107619243 | 1,50E+00 | 2,21E-01 | 5,50E-01 | Vip           | 0,26 | No  |
| ENSMUSG00000019773 | 1,95E-01  | 4,335610074  | 5,47E+00 | 1,93E-02 | 1,48E-01 | Fbxo5         | 1,15 | No  |
| ENSMUSG00000019774 | 4,93E-03  | 3,000407928  | 1,94E-03 | 9,65E-01 | 1,00E+00 | Mtrf1l        | 1,00 | No  |
| ENSMUSG00000019777 | 1,43E-01  | 5,012405706  | 3,77E+00 | 5,21E-02 | 2,78E-01 | Hdac2         | 1,10 | No  |
| ENSMUSG00000019779 | -4,60E-01 | -2,311169208 | 3,91E-01 | 5,32E-01 | 8,06E-01 | Frk           | 0,73 | No  |
| ENSMUSG00000019782 | 3,82E-02  | 3,716395182  | 1,63E-01 | 6,87E-01 | 8,97E-01 | Rwdd1         | 1,03 | No  |
| ENSMUSG00000019787 | 1,87E+00  | -3,107639691 | 1,38E+00 | 2,40E-01 | 5,50E-01 | Trdn          | 3,67 | No  |
| ENSMUSG00000019789 | 7,56E-01  | -2,963268003 | 3,13E-01 | 5,76E-01 | 8,34E-01 | Hey2          | 1,69 | No  |
| ENSMUSG00000019790 | 1,74E-01  | 5,647244828  | 6,48E+00 | 1,09E-02 | 9,97E-02 | Stxbp5        | 1,13 | No  |
| ENSMUSG00000019791 | -3,55E-01 | 3,646626594  | 1,38E+01 | 2,06E-04 | 4,46E-03 | Hint3         | 0,78 | Yes |
| ENSMUSG00000019792 | 3,40E-02  | 2,299259558  | 6,06E-02 | 8,06E-01 | 9,63E-01 | Trmt11        | 1,02 | No  |
| ENSMUSG00000019794 | -1,33E-02 | 4,285841697  | 2,56E-02 | 8,73E-01 | 1,00E+00 | Katna1        | 0,99 | No  |
| ENSMUSG00000019795 | 5,16E-03  | 5,849363398  | 6,03E-03 | 9,38E-01 | 1,00E+00 | Pcmt1         | 1,00 | No  |
| ENSMUSG00000019796 | -8,44E-02 | 3,089295357  | 5,87E-01 | 4,44E-01 | 7,35E-01 | Lrp11         | 0,94 | No  |
| ENSMUSG00000019797 | 1,82E-01  | 3,281828012  | 2,99E+00 | 8,36E-02 | 3,71E-01 | 1700021F05Rik | 1,13 | No  |

|                    |           |              |          |          |          |          |      |     |
|--------------------|-----------|--------------|----------|----------|----------|----------|------|-----|
| ENSMUSG00000019802 | -2,08E-02 | 6,485474857  | 1,09E-01 | 7,41E-01 | 9,27E-01 | Sec63    | 0,99 | No  |
| ENSMUSG00000019804 | 1,08E-01  | 7,894315997  | 3,41E+00 | 6,47E-02 | 3,19E-01 | Snx3     | 1,08 | No  |
| ENSMUSG00000019806 | -3,59E-01 | 2,37099857   | 7,19E+00 | 7,33E-03 | 7,42E-02 | Aig1     | 0,78 | No  |
| ENSMUSG00000019808 | -3,89E-02 | 2,378385932  | 8,30E-02 | 7,73E-01 | 9,44E-01 | Adat2    | 0,97 | No  |
| ENSMUSG00000019809 | -8,66E-03 | 3,517407     | 7,66E-03 | 9,30E-01 | 1,00E+00 | Pex3     | 0,99 | No  |
| ENSMUSG00000019810 | 1,17E-01  | 7,584401937  | 3,95E+00 | 4,68E-02 | 2,59E-01 | Fuca2    | 1,08 | No  |
| ENSMUSG00000019813 | -7,03E-02 | 3,250395305  | 4,56E-01 | 5,00E-01 | 7,85E-01 | Cep57l1  | 0,95 | No  |
| ENSMUSG00000019814 | 1,72E-01  | 5,003861647  | 5,35E+00 | 2,07E-02 | 1,55E-01 | Ltv1     | 1,13 | No  |
| ENSMUSG00000019815 | -1,89E+00 | -3,1076441   | 1,42E+00 | 2,33E-01 | 5,50E-01 | Zc2hc1b  | 0,27 | No  |
| ENSMUSG00000019817 | -4,24E-02 | 1,539435134  | 6,07E-02 | 8,05E-01 | 9,63E-01 | Plagl1   | 0,97 | No  |
| ENSMUSG00000019818 | -1,55E-01 | 9,158327335  | 7,45E+00 | 6,35E-03 | 6,69E-02 | Cd164    | 0,90 | No  |
| ENSMUSG00000019820 | -1,29E-01 | 5,287901675  | 3,32E+00 | 6,86E-02 | 3,29E-01 | Utrn     | 0,91 | No  |
| ENSMUSG00000019822 | 2,34E-02  | 5,146867302  | 1,04E-01 | 7,48E-01 | 9,30E-01 | Smpd2    | 1,02 | No  |
| ENSMUSG00000019823 | 6,22E-02  | 7,54725989   | 1,10E+00 | 2,93E-01 | 5,89E-01 | Mical1   | 1,04 | No  |
| ENSMUSG00000019826 | 6,33E-02  | 3,938297983  | 5,00E-01 | 4,79E-01 | 7,67E-01 | Zbtb24   | 1,04 | No  |
| ENSMUSG00000019831 | -5,59E-01 | -2,600719053 | 2,45E-01 | 6,20E-01 | 8,57E-01 | Wasf1    | 0,68 | No  |
| ENSMUSG00000019832 | 1,54E-01  | 6,289186739  | 5,81E+00 | 1,60E-02 | 1,31E-01 | Rab32    | 1,11 | No  |
| ENSMUSG00000019836 | 2,49E-01  | 2,140061181  | 2,84E+00 | 9,21E-02 | 3,82E-01 | Amd-ps4  | 1,19 | No  |
| ENSMUSG00000019837 | -8,32E-03 | 4,352298885  | 1,02E-02 | 9,19E-01 | 1,00E+00 | Gtf3c6   | 0,99 | No  |
| ENSMUSG00000019838 | -4,50E-02 | 4,146664612  | 2,71E-01 | 6,02E-01 | 8,48E-01 | Slc16a10 | 0,97 | No  |
| ENSMUSG00000019841 | 5,15E-02  | 5,727177369  | 5,85E-01 | 4,45E-01 | 7,36E-01 | Rev3l    | 1,04 | No  |
| ENSMUSG00000019842 | -1,87E-01 | 2,505706775  | 2,19E+00 | 1,39E-01 | 4,71E-01 | Traf3ip2 | 0,88 | No  |
| ENSMUSG00000019843 | 8,66E-03  | 6,447713935  | 1,89E-02 | 8,91E-01 | 1,00E+00 | Fyn      | 1,01 | No  |
| ENSMUSG00000019845 | 2,35E-01  | 2,970695504  | 4,20E+00 | 4,05E-02 | 2,38E-01 | Tube1    | 1,18 | No  |
| ENSMUSG00000019846 | -8,38E-01 | -2,268023365 | 1,25E+00 | 2,63E-01 | 5,57E-01 | Lama4    | 0,56 | No  |
| ENSMUSG00000019848 | -2,37E-01 | -1,863649169 | 1,24E-01 | 7,25E-01 | 9,18E-01 | Popdc3   | 0,85 | No  |
| ENSMUSG00000019849 | 4,64E-02  | 6,557375871  | 5,48E-01 | 4,59E-01 | 7,48E-01 | Prep     | 1,03 | No  |
| ENSMUSG00000019850 | -4,44E-01 | 6,870116267  | 5,25E+01 | 4,30E-13 | 5,48E-11 | Tnfaip3  | 0,73 | Yes |
| ENSMUSG00000019851 | 1,22E-01  | 1,715632509  | 5,63E-01 | 4,53E-01 | 7,43E-01 | Perp     | 1,09 | No  |
| ENSMUSG00000019852 | 2,46E-01  | 4,077331082  | 7,85E+00 | 5,09E-03 | 5,66E-02 | Arfgef3  | 1,19 | No  |
| ENSMUSG00000019853 | 9,26E-02  | 1,575275582  | 2,98E-01 | 5,85E-01 | 8,38E-01 | Hebp2    | 1,07 | No  |
| ENSMUSG00000019854 | 1,12E-01  | 5,693267513  | 2,73E+00 | 9,85E-02 | 3,91E-01 | Reps1    | 1,08 | No  |

|                    |           |              |           |          |          |          |       |      |     |
|--------------------|-----------|--------------|-----------|----------|----------|----------|-------|------|-----|
| ENSMUSG00000019856 | 7,07E-01  | -2,655190462 | 2,74E-01  | 6,01E-01 | 8,47E-01 | Fam184a  |       | 1,63 | No  |
| ENSMUSG00000019857 | 1,42E-02  | 3,627801828  | 2,16E-02  | 8,83E-01 | 1,00E+00 | Asf1a    |       | 1,01 | No  |
| ENSMUSG00000019861 | 8,82E-02  | 5,222008715  | 1,54E+00  | 2,15E-01 | 5,50E-01 | Gopc     |       | 1,06 | No  |
| ENSMUSG00000019863 | 1,11E-01  | 3,944555438  | 1,51E+00  | 2,19E-01 | 5,50E-01 | Qrsl1    |       | 1,08 | No  |
| ENSMUSG00000019864 | 1,20E-01  | 4,436760395  | 2,21E+00  | 1,37E-01 | 4,68E-01 | Rtn4ip1  |       | 1,09 | No  |
| ENSMUSG00000019865 | 3,14E-02  | -3,107617333 | -7,69E-10 | 1,00E+00 | 1,00E+00 | Nmbr     |       | 1,02 | No  |
| ENSMUSG00000019866 | -1,28E-01 | 7,232534828  | 4,61E+00  | 3,17E-02 | 2,06E-01 | Crybg1   |       | 0,91 | No  |
| ENSMUSG00000019868 | -5,78E-02 | 4,76788477   | 5,64E-01  | 4,53E-01 | 7,42E-01 | Vta1     |       | 0,96 | No  |
| ENSMUSG00000019872 | -1,59E-01 | 6,515938624  | 6,47E+00  | 1,10E-02 | 9,98E-02 | Smpdl3a  |       | 0,90 | No  |
| ENSMUSG00000019873 | -6,60E-02 | 7,206233657  | 1,21E+00  | 2,72E-01 | 5,68E-01 | Reep3    |       | 0,96 | No  |
| ENSMUSG00000019874 | -8,55E-01 | 0,266805036  | 9,63E+00  | 1,91E-03 | 2,70E-02 | Fabp7    |       | 0,55 | Yes |
| ENSMUSG00000019876 | -6,51E-01 | 7,048377616  | 1,16E+02  | 5,89E-27 | 2,45E-24 | Pkib     |       | 0,64 | Yes |
| ENSMUSG00000019877 | 3,28E-02  | 8,070152226  | 3,19E-01  | 5,72E-01 | 8,32E-01 | Serinc1  |       | 1,02 | No  |
| ENSMUSG00000019878 | -4,79E-01 | 5,894287393  | 5,28E+01  | 3,61E-13 | 4,69E-11 | Hsf2     |       | 0,72 | Yes |
| ENSMUSG00000019883 | -7,67E-02 | 4,905364586  | 1,06E+00  | 3,04E-01 | 6,01E-01 | Echdc1   |       | 0,95 | No  |
| ENSMUSG00000019889 | -7,88E-02 | -2,89616692  | 4,36E-03  | 9,47E-01 | 1,00E+00 | Ptprk    |       | 0,95 | No  |
| ENSMUSG00000019890 | -2,70E+00 | -2,896126596 | 2,88E+00  | 8,95E-02 | 3,79E-01 | Nts      |       | 0,15 | No  |
| ENSMUSG00000019891 | -6,78E-02 | -2,185664644 | 7,44E-03  | 9,31E-01 | 1,00E+00 | Dcbld1   |       | 0,95 | No  |
| ENSMUSG00000019894 | -1,29E+00 | -0,389658206 | 1,53E+01  | 8,98E-05 | 2,22E-03 | Slc6a15  |       | 0,41 | Yes |
| ENSMUSG00000019897 | -5,47E-02 | 5,407793096  | 6,10E-01  | 4,35E-01 | 7,28E-01 | Ccdc59   |       | 0,96 | No  |
| ENSMUSG00000019899 | 1,19E+00  | -0,676303549 | 9,24E+00  | 2,36E-03 | 3,20E-02 | Lama2    |       | 2,28 | Yes |
| ENSMUSG00000019907 | -2,13E-01 | 7,096071555  | 1,24E+01  | 4,25E-04 | 8,01E-03 | Ppp1r12a |       | 0,86 | Yes |
| ENSMUSG00000019909 | -1,94E+00 | -3,107619243 | 1,50E+00  | 2,21E-01 | 5,50E-01 | Fam162b  |       | 0,26 | No  |
| ENSMUSG00000019916 | 3,07E-01  | 6,240072617  | 2,28E+01  | 1,80E-06 | 7,42E-05 | P4ha1    |       | 1,24 | Yes |
| ENSMUSG00000019917 | 1,42E-01  | 3,477245945  | 2,08E+00  | 1,49E-01 | 4,90E-01 |          | 40422 | 1,10 | No  |
| ENSMUSG00000019920 | 1,05E-01  | 7,552116293  | 3,18E+00  | 7,46E-02 | 3,47E-01 | Lims1    |       | 1,08 | No  |
| ENSMUSG00000019923 | -1,11E-02 | 5,662193785  | 2,68E-02  | 8,70E-01 | 1,00E+00 | Zwint    |       | 0,99 | No  |
| ENSMUSG00000019927 | 1,38E-01  | 4,345371189  | 2,78E+00  | 9,52E-02 | 3,86E-01 | Ube2d1   |       | 1,10 | No  |
| ENSMUSG00000019929 | -2,62E+00 | -1,069994506 | 2,99E+01  | 4,61E-08 | 2,78E-06 | Dcn      |       | 0,16 | Yes |
| ENSMUSG00000019933 | -8,98E-01 | -2,033542381 | 1,72E+00  | 1,90E-01 | 5,50E-01 | Mrln     |       | 0,54 | No  |
| ENSMUSG00000019935 | 2,35E-01  | 1,334000775  | 1,66E+00  | 1,98E-01 | 5,50E-01 | Slc17a8  |       | 1,18 | No  |
| ENSMUSG00000019942 | 1,79E-01  | 6,014778463  | 7,41E+00  | 6,47E-03 | 6,78E-02 | Cdk1     |       | 1,13 | No  |

|                    |           |              |          |          |          |               |      |     |
|--------------------|-----------|--------------|----------|----------|----------|---------------|------|-----|
| ENSMUSG00000019943 | 2,25E-01  | 7,988910756  | 1,48E+01 | 1,21E-04 | 2,85E-03 | Atp2b1        | 1,17 | Yes |
| ENSMUSG00000019944 | 4,33E-01  | 2,740934696  | 1,32E+01 | 2,73E-04 | 5,63E-03 | Rhobtb1       | 1,35 | Yes |
| ENSMUSG00000019945 | 6,44E-01  | -2,6276819   | 3,43E-01 | 5,58E-01 | 8,22E-01 | 1700040L02Rik | 1,56 | No  |
| ENSMUSG00000019947 | 2,59E-02  | 5,556197162  | 1,41E-01 | 7,08E-01 | 9,08E-01 | Arid5b        | 1,02 | No  |
| ENSMUSG00000019948 | 2,13E-01  | 2,470464095  | 2,70E+00 | 1,00E-01 | 3,92E-01 | Actr6         | 1,16 | No  |
| ENSMUSG00000019951 | 4,44E-02  | 5,792708498  | 4,37E-01 | 5,09E-01 | 7,92E-01 | Uhrf1bp1l     | 1,03 | No  |
| ENSMUSG00000019952 | 3,12E-02  | 4,024584795  | 1,24E-01 | 7,25E-01 | 9,18E-01 | Poc1b         | 1,02 | No  |
| ENSMUSG00000019960 | 2,50E-01  | 5,711849067  | 1,35E+01 | 2,43E-04 | 5,11E-03 | Dusp6         | 1,19 | Yes |
| ENSMUSG00000019961 | 1,70E-01  | 7,351760124  | 8,08E+00 | 4,47E-03 | 5,13E-02 | Tmpo          | 1,12 | No  |
| ENSMUSG00000019966 | -5,94E-01 | 1,435767157  | 1,13E+01 | 7,66E-04 | 1,30E-02 | Kitl          | 0,66 | Yes |
| ENSMUSG00000019969 | 1,30E-01  | 6,825075617  | 4,51E+00 | 3,38E-02 | 2,16E-01 | Psen1         | 1,09 | No  |
| ENSMUSG00000019970 | 7,56E-02  | 7,605267789  | 1,63E+00 | 2,01E-01 | 5,50E-01 | Sgk1          | 1,05 | No  |
| ENSMUSG00000019971 | 1,51E-01  | 3,689503561  | 2,48E+00 | 1,15E-01 | 4,20E-01 | Cep290        | 1,11 | No  |
| ENSMUSG00000019975 | 1,50E-01  | 2,755206854  | 1,56E+00 | 2,12E-01 | 5,50E-01 | Ikkip         | 1,11 | No  |
| ENSMUSG00000019977 | -2,34E-02 | 5,18635892   | 1,06E-01 | 7,44E-01 | 9,29E-01 | Hbs1l         | 0,98 | No  |
| ENSMUSG00000019978 | 2,79E-02  | 7,051795189  | 2,12E-01 | 6,45E-01 | 8,73E-01 | Epb41l2       | 1,02 | No  |
| ENSMUSG00000019979 | 5,64E-02  | 6,588414955  | 8,20E-01 | 3,65E-01 | 6,66E-01 | Apaf1         | 1,04 | No  |
| ENSMUSG00000019982 | 1,48E-01  | 1,316484642  | 6,30E-01 | 4,28E-01 | 7,21E-01 | Myb           | 1,11 | No  |
| ENSMUSG00000019984 | 4,06E-02  | 5,088907382  | 3,07E-01 | 5,80E-01 | 8,36E-01 | Med23         | 1,03 | No  |
| ENSMUSG00000019986 | 6,16E-02  | 2,605242354  | 2,30E-01 | 6,31E-01 | 8,63E-01 | Ahi1          | 1,04 | No  |
| ENSMUSG00000019987 | 7,77E-01  | 1,807101393  | 2,27E+01 | 1,89E-06 | 7,74E-05 | Arg1          | 1,71 | Yes |
| ENSMUSG00000019988 | 1,64E-01  | 4,506759881  | 4,20E+00 | 4,04E-02 | 2,38E-01 | Nedd1         | 1,12 | No  |
| ENSMUSG00000019989 | -4,83E-02 | -2,770561466 | 1,58E-03 | 9,68E-01 | 1,00E+00 | Enpp3         | 0,97 | No  |
| ENSMUSG00000019990 | -1,40E-01 | 3,333424511  | 1,89E+00 | 1,70E-01 | 5,25E-01 | Pde7b         | 0,91 | No  |
| ENSMUSG00000019992 | 1,12E-01  | 4,219008817  | 1,70E+00 | 1,92E-01 | 5,50E-01 | Mtfr2         | 1,08 | No  |
| ENSMUSG00000019996 | -1,32E-01 | 1,336259452  | 5,04E-01 | 4,78E-01 | 7,65E-01 | Map7          | 0,91 | No  |
| ENSMUSG00000019997 | -1,12E+00 | -1,236377801 | 5,42E+00 | 1,99E-02 | 1,51E-01 | Ctgf          | 0,46 | No  |
| ENSMUSG00000019998 | -5,06E-02 | 7,289944084  | 7,16E-01 | 3,98E-01 | 6,98E-01 | Stx7          | 0,97 | No  |
| ENSMUSG00000020003 | -3,24E-02 | 3,480942372  | 1,05E-01 | 7,46E-01 | 9,30E-01 | Pex7          | 0,98 | No  |
| ENSMUSG00000020007 | -1,89E+00 | -3,033648118 | 1,42E+00 | 2,33E-01 | 5,50E-01 | Il20ra        | 0,27 | No  |
| ENSMUSG00000020009 | 3,64E-02  | 7,073772723  | 3,61E-01 | 5,48E-01 | 8,15E-01 | lfng1         | 1,03 | No  |
| ENSMUSG00000020010 | 1,83E-01  | -0,015769736 | 3,81E-01 | 5,37E-01 | 8,09E-01 | Vnn3          | 1,14 | No  |

|                    |           |              |          |          |          |               |      |     |
|--------------------|-----------|--------------|----------|----------|----------|---------------|------|-----|
| ENSMUSG00000020014 | 1,31E-01  | -1,401199253 | 5,62E-02 | 8,13E-01 | 9,67E-01 | Cfap54        | 1,10 | No  |
| ENSMUSG00000020015 | -8,46E-02 | 5,225058626  | 1,40E+00 | 2,37E-01 | 5,50E-01 | Cdk17         | 0,94 | No  |
| ENSMUSG00000020017 | 2,09E-01  | 2,363999287  | 2,41E+00 | 1,21E-01 | 4,33E-01 | Hal           | 1,16 | No  |
| ENSMUSG00000020018 | -2,50E-02 | 2,380810254  | 3,47E-02 | 8,52E-01 | 9,91E-01 | Snrpf         | 0,98 | No  |
| ENSMUSG00000020019 | -6,43E-02 | 1,402279769  | 1,29E-01 | 7,20E-01 | 9,15E-01 | Ntn4          | 0,96 | No  |
| ENSMUSG00000020020 | -7,36E-02 | -1,740943076 | 8,75E-03 | 9,25E-01 | 1,00E+00 | Usp44         | 0,95 | No  |
| ENSMUSG00000020021 | 2,15E-01  | 5,843145935  | 1,04E+01 | 1,24E-03 | 1,93E-02 | Fgd6          | 1,16 | Yes |
| ENSMUSG00000020022 | -1,08E-01 | 3,402827568  | 1,12E+00 | 2,89E-01 | 5,85E-01 | Ndufa12       | 0,93 | No  |
| ENSMUSG00000020023 | -3,06E-01 | 5,674115717  | 2,06E+01 | 5,52E-06 | 1,98E-04 | Tmcc3         | 0,81 | Yes |
| ENSMUSG00000020024 | -4,48E-02 | 5,207890169  | 3,85E-01 | 5,35E-01 | 8,07E-01 | Cep83         | 0,97 | No  |
| ENSMUSG00000020027 | -2,84E-01 | 8,266713393  | 2,41E+01 | 9,06E-07 | 4,09E-05 | Socs2         | 0,82 | Yes |
| ENSMUSG00000020029 | 1,06E-03  | 6,345185999  | 2,79E-04 | 9,87E-01 | 1,00E+00 | Nudt4         | 1,00 | No  |
| ENSMUSG00000020032 | 7,51E-02  | 4,252003839  | 8,10E-01 | 3,68E-01 | 6,69E-01 | Nuak1         | 1,05 | No  |
| ENSMUSG00000020033 | -1,98E-02 | -3,033655952 | 2,83E-11 | 1,00E+00 | 1,00E+00 | 4930463O16Rik | 0,99 | No  |
| ENSMUSG00000020034 | 4,00E-02  | 3,703506079  | 1,76E-01 | 6,75E-01 | 8,91E-01 | Tcp11l2       | 1,03 | No  |
| ENSMUSG00000020037 | 7,45E-01  | -2,832009043 | 3,02E-01 | 5,83E-01 | 8,38E-01 | Rfx4          | 1,68 | No  |
| ENSMUSG00000020038 | 1,91E-01  | 3,816327866  | 4,23E+00 | 3,98E-02 | 2,37E-01 | Cry1          | 1,14 | No  |
| ENSMUSG00000020042 | 5,72E-01  | -0,425017227 | 2,74E+00 | 9,77E-02 | 3,90E-01 | Btbd11        | 1,49 | No  |
| ENSMUSG00000020044 | -1,49E+00 | 1,693678425  | 8,46E+01 | 3,62E-20 | 8,35E-18 | Timp3         | 0,36 | Yes |
| ENSMUSG00000020048 | 8,40E-02  | 9,240032326  | 2,19E+00 | 1,38E-01 | 4,70E-01 | Hsp90b1       | 1,06 | No  |
| ENSMUSG00000020051 | -7,38E-02 | -3,033634644 | 2,66E-03 | 9,59E-01 | 1,00E+00 | Pah           | 0,95 | No  |
| ENSMUSG00000020053 | 1,15E-01  | 5,736680528  | 2,89E+00 | 8,89E-02 | 3,79E-01 | Igf1          | 1,08 | No  |
| ENSMUSG00000020056 | 1,16E-02  | 4,090509604  | 1,79E-02 | 8,94E-01 | 1,00E+00 | Washc3        | 1,01 | No  |
| ENSMUSG00000020057 | 3,82E-02  | 5,879319489  | 3,30E-01 | 5,66E-01 | 8,28E-01 | Dram1         | 1,03 | No  |
| ENSMUSG00000020059 | 2,12E-01  | -0,211029151 | 4,40E-01 | 5,07E-01 | 7,91E-01 | Sycp3         | 1,16 | No  |
| ENSMUSG00000020061 | -7,69E-02 | -2,963220349 | 2,69E-03 | 9,59E-01 | 1,00E+00 | Mybpc1        | 0,95 | No  |
| ENSMUSG00000020062 | -3,73E-01 | -2,49761691  | 1,76E-01 | 6,75E-01 | 8,91E-01 | Slc5a8        | 0,77 | No  |
| ENSMUSG00000020063 | 2,68E-02  | 4,877522978  | 1,28E-01 | 7,21E-01 | 9,16E-01 | Sirt1         | 1,02 | No  |
| ENSMUSG00000020064 | 1,25E-02  | 5,797619839  | 3,52E-02 | 8,51E-01 | 9,90E-01 | Herc4         | 1,01 | No  |
| ENSMUSG00000020069 | -3,12E-01 | 4,668090522  | 1,62E+01 | 5,76E-05 | 1,53E-03 | Hnrnp3        | 0,81 | Yes |
| ENSMUSG00000020070 | -7,16E-03 | 4,473984897  | 7,96E-03 | 9,29E-01 | 1,00E+00 | Rufy2         | 1,00 | No  |
| ENSMUSG00000020072 | -1,60E-01 | -0,740946398 | 1,68E-01 | 6,82E-01 | 8,94E-01 | Pbld2         | 0,90 | No  |



|                    |           |              |          |          |          |               |      |     |
|--------------------|-----------|--------------|----------|----------|----------|---------------|------|-----|
| ENSMUSG00000020074 | -1,25E-02 | 6,843623519  | 4,19E-02 | 8,38E-01 | 9,82E-01 | Ccar1         | 0,99 | No  |
| ENSMUSG00000020075 | 5,46E-02  | 7,211964411  | 8,26E-01 | 3,63E-01 | 6,64E-01 | Ddx21         | 1,04 | No  |
| ENSMUSG00000020076 | -1,23E-01 | 5,566693872  | 3,23E+00 | 7,24E-02 | 3,41E-01 | Ddx50         | 0,92 | No  |
| ENSMUSG00000020077 | -3,73E-02 | 7,916302747  | 4,06E-01 | 5,24E-01 | 8,01E-01 | Srgn          | 0,97 | No  |
| ENSMUSG00000020078 | 1,30E-01  | 7,086114533  | 4,60E+00 | 3,19E-02 | 2,07E-01 | Vps26a        | 1,09 | No  |
| ENSMUSG00000020079 | -9,99E-02 | 4,305909894  | 1,43E+00 | 2,31E-01 | 5,50E-01 | Supv3l1       | 0,93 | No  |
| ENSMUSG00000020080 | -3,06E-02 | -2,600629127 | 7,06E-04 | 9,79E-01 | 1,00E+00 | Hkdc1         | 0,98 | No  |
| ENSMUSG00000020081 | -1,87E+00 | -3,107637761 | 1,39E+00 | 2,38E-01 | 5,50E-01 | Tacr2         | 0,27 | No  |
| ENSMUSG00000020083 | 3,98E-01  | -2,107590952 | 2,54E-01 | 6,15E-01 | 8,53E-01 | 2010107G23Rik | 1,32 | No  |
| ENSMUSG00000020085 | -1,27E-01 | 4,650728973  | 2,61E+00 | 1,06E-01 | 3,99E-01 | Aifm2         | 0,92 | No  |
| ENSMUSG00000020086 | -4,34E-02 | -0,024656269 | 2,02E-02 | 8,87E-01 | 1,00E+00 | H2afy2        | 0,97 | No  |
| ENSMUSG00000020087 | 2,05E-01  | 4,847512033  | 7,25E+00 | 7,09E-03 | 7,25E-02 | Tysnd1        | 1,15 | No  |
| ENSMUSG00000020088 | -3,48E-02 | 6,83033029   | 3,22E-01 | 5,70E-01 | 8,31E-01 | Sar1a         | 0,98 | No  |
| ENSMUSG00000020089 | -1,16E-01 | 4,047897734  | 1,72E+00 | 1,90E-01 | 5,50E-01 | Ppa1          | 0,92 | No  |
| ENSMUSG00000020090 | -2,33E-01 | 0,079213716  | 7,08E-01 | 4,00E-01 | 6,99E-01 | Npffr1        | 0,85 | No  |
| ENSMUSG00000020091 | 9,00E-02  | 7,969105853  | 2,39E+00 | 1,22E-01 | 4,37E-01 | Eif4ebp2      | 1,06 | No  |
| ENSMUSG00000020092 | 3,77E-01  | 7,080337175  | 3,85E+01 | 5,56E-10 | 4,69E-08 | Pald1         | 1,30 | Yes |
| ENSMUSG00000020096 | -8,50E-01 | -2,896168286 | 3,96E-01 | 5,29E-01 | 8,05E-01 | Tbata         | 0,55 | No  |
| ENSMUSG00000020097 | 6,72E-02  | 8,54258961   | 1,37E+00 | 2,42E-01 | 5,50E-01 | Sgpl1         | 1,05 | No  |
| ENSMUSG00000020098 | -9,93E-01 | -0,300139397 | 8,19E+00 | 4,21E-03 | 4,91E-02 | Pcbd1         | 0,50 | Yes |
| ENSMUSG00000020099 | -2,13E+00 | 0,558130657  | 7,03E+01 | 5,03E-17 | 9,25E-15 | Unc5b         | 0,23 | Yes |
| ENSMUSG00000020100 | 3,23E-01  | 7,81207585   | 3,04E+01 | 3,56E-08 | 2,18E-06 | Slc29a3       | 1,25 | Yes |
| ENSMUSG00000020101 | -5,39E-02 | 7,638534168  | 8,37E-01 | 3,60E-01 | 6,62E-01 | Vsir          | 0,96 | No  |
| ENSMUSG00000020102 | 3,53E-01  | 3,460100135  | 1,18E+01 | 5,79E-04 | 1,04E-02 | Slc16a7       | 1,28 | Yes |
| ENSMUSG00000020105 | 2,31E-01  | 0,337942099  | 7,56E-01 | 3,85E-01 | 6,86E-01 | Lrig3         | 1,17 | No  |
| ENSMUSG00000020107 | -1,20E-02 | 4,981575724  | 2,61E-02 | 8,72E-01 | 1,00E+00 | Anapc16       | 0,99 | No  |
| ENSMUSG00000020108 | -3,93E-01 | 2,600214499  | 1,03E+01 | 1,32E-03 | 2,02E-02 | Ddit4         | 0,76 | Yes |
| ENSMUSG00000020109 | 3,88E-02  | 5,508984761  | 3,15E-01 | 5,75E-01 | 8,34E-01 | Dnajb12       | 1,03 | No  |
| ENSMUSG00000020111 | 3,80E-03  | 5,461620241  | 2,99E-03 | 9,56E-01 | 1,00E+00 | Micu1         | 1,00 | No  |
| ENSMUSG00000020114 | -9,33E-02 | 6,716518784  | 2,29E+00 | 1,30E-01 | 4,53E-01 | Cand1         | 0,94 | No  |
| ENSMUSG00000020115 | -3,63E-02 | 6,294088138  | 3,24E-01 | 5,69E-01 | 8,30E-01 | Tbk1          | 0,98 | No  |
| ENSMUSG00000020116 | 7,35E-02  | 5,091018355  | 1,01E+00 | 3,15E-01 | 6,16E-01 | Pno1          | 1,05 | No  |

|                    |           |              |           |          |          |               |      |     |
|--------------------|-----------|--------------|-----------|----------|----------|---------------|------|-----|
| ENSMUSG00000020120 | -6,53E-03 | 9,419629986  | 1,33E-02  | 9,08E-01 | 1,00E+00 | Plek          | 1,00 | No  |
| ENSMUSG00000020121 | -7,16E-01 | -0,175354611 | 5,04E+00  | 2,48E-02 | 1,74E-01 | Srgap1        | 0,61 | No  |
| ENSMUSG00000020122 | 2,59E-01  | 2,913225695  | 4,91E+00  | 2,67E-02 | 1,83E-01 | Egfr          | 1,20 | No  |
| ENSMUSG00000020123 | 1,87E+00  | -3,107639691 | 1,38E+00  | 2,40E-01 | 5,50E-01 | Avpr1a        | 3,67 | No  |
| ENSMUSG00000020124 | 4,59E-02  | 6,475008766  | 5,32E-01  | 4,66E-01 | 7,54E-01 | Usp15         | 1,03 | No  |
| ENSMUSG00000020125 | -6,04E-01 | -2,548240663 | 4,97E-01  | 4,81E-01 | 7,69E-01 | Elane         | 0,66 | No  |
| ENSMUSG00000020128 | 3,38E-02  | 5,809540224  | 2,57E-01  | 6,12E-01 | 8,52E-01 | Vps54         | 1,02 | No  |
| ENSMUSG00000020130 | -2,87E-01 | 6,426884068  | 2,09E+01  | 4,82E-06 | 1,75E-04 | Tbc1d15       | 0,82 | Yes |
| ENSMUSG00000020131 | -2,39E-01 | -0,69726892  | 4,38E-01  | 5,08E-01 | 7,92E-01 | Pcsk4         | 0,85 | No  |
| ENSMUSG00000020132 | -1,44E-01 | 6,617997018  | 5,39E+00  | 2,02E-02 | 1,52E-01 | Rab21         | 0,91 | No  |
| ENSMUSG00000020133 | 1,43E-02  | 5,767066659  | 4,56E-02  | 8,31E-01 | 9,78E-01 | 2310011J03Rik | 1,01 | No  |
| ENSMUSG00000020134 | -1,76E-01 | 5,222463688  | 6,11E+00  | 1,34E-02 | 1,16E-01 | Peli1         | 0,89 | No  |
| ENSMUSG00000020135 | -7,22E-01 | 0,362604689  | 7,61E+00  | 5,79E-03 | 6,24E-02 | Apc2          | 0,61 | No  |
| ENSMUSG00000020137 | 2,87E-01  | 3,009529841  | 6,83E+00  | 8,96E-03 | 8,60E-02 | Thap2         | 1,22 | No  |
| ENSMUSG00000020140 | -1,04E-02 | -2,963271219 | -1,18E-10 | 1,00E+00 | 1,00E+00 | Lgr5          | 0,99 | No  |
| ENSMUSG00000020142 | -3,74E-01 | 4,102817     | 1,93E+01  | 1,09E-05 | 3,64E-04 | Slc1a4        | 0,77 | Yes |
| ENSMUSG00000020143 | 1,77E-02  | 8,247863095  | 9,42E-02  | 7,59E-01 | 9,36E-01 | Dock2         | 1,01 | No  |
| ENSMUSG00000020149 | 8,84E-02  | 7,879426709  | 2,29E+00  | 1,31E-01 | 4,54E-01 | Rab1a         | 1,06 | No  |
| ENSMUSG00000020150 | 3,41E-01  | 3,01411194   | 8,71E+00  | 3,16E-03 | 3,99E-02 | Gamt          | 1,27 | Yes |
| ENSMUSG00000020151 | 1,22E-02  | -1,236733964 | 5,71E-04  | 9,81E-01 | 1,00E+00 | Ptpr          | 1,01 | No  |
| ENSMUSG00000020152 | -1,49E-02 | 9,290112735  | 6,89E-02  | 7,93E-01 | 9,56E-01 | Actr2         | 0,99 | No  |
| ENSMUSG00000020153 | 1,73E-01  | 4,916306855  | 5,28E+00  | 2,15E-02 | 1,58E-01 | Ndufs7        | 1,13 | No  |
| ENSMUSG00000020154 | 1,84E+00  | -3,033632273 | 1,33E+00  | 2,49E-01 | 5,50E-01 | Ptprb         | 3,58 | No  |
| ENSMUSG00000020155 | -8,52E-01 | -2,896155156 | 3,98E-01  | 5,28E-01 | 8,04E-01 | Kcnmb1        | 0,55 | No  |
| ENSMUSG00000020156 | 2,05E-01  | 5,141222132  | 8,05E+00  | 4,55E-03 | 5,20E-02 | Mum1          | 1,15 | No  |
| ENSMUSG00000020160 | 2,28E-03  | 2,241709996  | 2,85E-04  | 9,87E-01 | 1,00E+00 | Meis1         | 1,00 | No  |
| ENSMUSG00000020163 | 6,87E-02  | 3,543506677  | 4,85E-01  | 4,86E-01 | 7,73E-01 | Uqcr11        | 1,05 | No  |
| ENSMUSG00000020164 | -1,91E+00 | -3,107631671 | 1,46E+00  | 2,27E-01 | 5,50E-01 | Kcnmb4os1     | 0,27 | No  |
| ENSMUSG00000020166 | -6,40E-02 | 5,486439148  | 8,57E-01  | 3,55E-01 | 6,56E-01 | Cnot2         | 0,96 | No  |
| ENSMUSG00000020167 | 1,06E-02  | 5,742964929  | 2,51E-02  | 8,74E-01 | 1,00E+00 | Tcf3          | 1,01 | No  |
| ENSMUSG00000020169 | -2,71E+00 | -2,963235336 | 2,92E+00  | 8,75E-02 | 3,78E-01 | Best3         | 0,15 | No  |
| ENSMUSG00000020170 | -4,25E-02 | 5,311276163  | 3,58E-01  | 5,50E-01 | 8,17E-01 | Frs2          | 0,97 | No  |

|                    |           |              |           |          |          |               |      |     |
|--------------------|-----------|--------------|-----------|----------|----------|---------------|------|-----|
| ENSMUSG00000020171 | 1,06E-01  | 5,118849365  | 2,11E+00  | 1,47E-01 | 4,85E-01 | Yeats4        | 1,08 | No  |
| ENSMUSG00000020173 | 7,18E-01  | -2,96326129  | 2,80E-01  | 5,97E-01 | 8,45E-01 | Cobl          | 1,65 | No  |
| ENSMUSG00000020175 | 4,22E-01  | 0,783838392  | 3,38E+00  | 6,60E-02 | 3,23E-01 | Rab36         | 1,34 | No  |
| ENSMUSG00000020176 | -1,66E+00 | 1,063148634  | 6,61E+01  | 4,26E-16 | 7,21E-14 | Grb10         | 0,32 | Yes |
| ENSMUSG00000020178 | -7,14E-01 | 4,336717284  | 7,62E+01  | 2,55E-18 | 5,09E-16 | Adora2a       | 0,61 | Yes |
| ENSMUSG00000020180 | -8,20E-02 | 5,421032941  | 1,37E+00  | 2,41E-01 | 5,50E-01 | Snrpd3        | 0,94 | No  |
| ENSMUSG00000020181 | 9,01E-03  | -3,107646452 | -5,16E-10 | 1,00E+00 | 1,00E+00 | Nav3          | 1,01 | No  |
| ENSMUSG00000020182 | 1,80E+00  | -2,770661771 | 1,30E+00  | 2,54E-01 | 5,50E-01 | Ddc           | 3,49 | No  |
| ENSMUSG00000020183 | -1,71E-01 | -0,033482524 | 3,71E-01  | 5,43E-01 | 8,12E-01 | Cpm           | 0,89 | No  |
| ENSMUSG00000020184 | -1,24E-01 | 7,551336337  | 4,37E+00  | 3,67E-02 | 2,28E-01 | Mdm2          | 0,92 | No  |
| ENSMUSG00000020185 | 4,63E-01  | 3,959377438  | 2,62E+01  | 3,12E-07 | 1,55E-05 | E2f7          | 1,38 | Yes |
| ENSMUSG00000020186 | 1,24E-02  | 2,198837344  | 7,72E-03  | 9,30E-01 | 1,00E+00 | Csrp2         | 1,01 | No  |
| ENSMUSG00000020189 | 1,42E-02  | 8,292006151  | 6,05E-02  | 8,06E-01 | 9,63E-01 | Osbp18        | 1,01 | No  |
| ENSMUSG00000020190 | -5,65E-02 | 7,922949014  | 9,39E-01  | 3,33E-01 | 6,33E-01 | Mknk2         | 0,96 | No  |
| ENSMUSG00000020191 | -7,67E-01 | -1,413028159 | 2,08E+00  | 1,49E-01 | 4,90E-01 | 4930415F15Rik | 0,59 | No  |
| ENSMUSG00000020193 | 2,89E-01  | -0,141293058 | 8,71E-01  | 3,51E-01 | 6,52E-01 | Zpbp          | 1,22 | No  |
| ENSMUSG00000020196 | 1,09E-01  | 6,959891707  | 3,23E+00  | 7,23E-02 | 3,41E-01 | Cabin1        | 1,08 | No  |
| ENSMUSG00000020198 | 9,47E-02  | 7,651991642  | 2,59E+00  | 1,08E-01 | 4,02E-01 | Ap3d1         | 1,07 | No  |
| ENSMUSG00000020205 | 1,17E-01  | 4,06085531   | 1,72E+00  | 1,90E-01 | 5,50E-01 | Phlda1        | 1,08 | No  |
| ENSMUSG00000020211 | 8,14E-02  | 5,515364255  | 1,38E+00  | 2,39E-01 | 5,50E-01 | Sf3a2         | 1,06 | No  |
| ENSMUSG00000020212 | -1,22E-01 | 2,917714116  | 1,14E+00  | 2,87E-01 | 5,83E-01 | Mdm1          | 0,92 | No  |
| ENSMUSG00000020216 | 6,76E-01  | -2,185738294 | 6,62E-01  | 4,16E-01 | 7,11E-01 | Jsrp1         | 1,60 | No  |
| ENSMUSG00000020218 | -1,94E+00 | -3,107619243 | 1,50E+00  | 2,21E-01 | 5,50E-01 | Wif1          | 0,26 | No  |
| ENSMUSG00000020219 | 1,80E-02  | 5,608585244  | 6,93E-02  | 7,92E-01 | 9,55E-01 | Timm13        | 1,01 | No  |
| ENSMUSG00000020220 | 1,45E-01  | 7,149446411  | 5,81E+00  | 1,59E-02 | 1,31E-01 | Vps13d        | 1,11 | No  |
| ENSMUSG00000020224 | -6,89E-02 | 4,673734746  | 7,86E-01  | 3,75E-01 | 6,76E-01 | Llph          | 0,95 | No  |
| ENSMUSG00000020225 | -9,91E-02 | 5,455714534  | 2,03E+00  | 1,54E-01 | 4,98E-01 | Tmbim4        | 0,93 | No  |
| ENSMUSG00000020226 | -3,83E-02 | -3,107651936 | -7,91E-11 | 1,00E+00 | 1,00E+00 | Slc5a4b       | 0,97 | No  |
| ENSMUSG00000020227 | 9,68E-03  | 4,848052035  | 1,62E-02  | 8,99E-01 | 1,00E+00 | Irak3         | 1,01 | No  |
| ENSMUSG00000020228 | 1,55E-01  | 5,038751102  | 4,43E+00  | 3,53E-02 | 2,22E-01 | Helb          | 1,11 | No  |
| ENSMUSG00000020229 | -3,83E-02 | -3,107651936 | -7,91E-11 | 1,00E+00 | 1,00E+00 | Slc5a4a       | 0,97 | No  |
| ENSMUSG00000020230 | -7,83E-02 | 4,25618224   | 8,75E-01  | 3,50E-01 | 6,51E-01 | Prmt2         | 0,95 | No  |

|                    |           |              |          |          |          |               |      |     |
|--------------------|-----------|--------------|----------|----------|----------|---------------|------|-----|
| ENSMUSG00000020231 | 1,41E-01  | 5,656204651  | 4,29E+00 | 3,83E-02 | 2,32E-01 | Dip2a         | 1,10 | No  |
| ENSMUSG00000020232 | -3,82E-02 | 6,079989212  | 3,48E-01 | 5,55E-01 | 8,20E-01 | Hmg20b        | 0,97 | No  |
| ENSMUSG00000020234 | 2,87E-01  | 5,937029023  | 1,90E+01 | 1,30E-05 | 4,23E-04 | 4930404N11Rik | 1,22 | Yes |
| ENSMUSG00000020235 | 3,85E-02  | 5,315123091  | 2,97E-01 | 5,86E-01 | 8,39E-01 | Fzr1          | 1,03 | No  |
| ENSMUSG00000020238 | 1,54E-01  | 6,895353821  | 6,31E+00 | 1,20E-02 | 1,07E-01 | Ncln          | 1,11 | No  |
| ENSMUSG00000020241 | -1,68E+00 | -1,355218452 | 8,87E+00 | 2,90E-03 | 3,73E-02 | Col6a2        | 0,31 | Yes |
| ENSMUSG00000020246 | -1,44E-03 | 3,388070206  | 1,95E-04 | 9,89E-01 | 1,00E+00 | Hcfc2         | 1,00 | No  |
| ENSMUSG00000020248 | 3,70E-02  | 4,355187235  | 2,01E-01 | 6,54E-01 | 8,79E-01 | Nfyb          | 1,03 | No  |
| ENSMUSG00000020250 | -2,26E-02 | 8,154236629  | 1,51E-01 | 6,97E-01 | 9,03E-01 | Txnrd1        | 0,98 | No  |
| ENSMUSG00000020251 | -4,11E-01 | -1,683131862 | 4,42E-01 | 5,06E-01 | 7,91E-01 | Glt8d2        | 0,75 | No  |
| ENSMUSG00000020253 | 6,55E-02  | 6,496959408  | 1,09E+00 | 2,96E-01 | 5,92E-01 | Ppm1m         | 1,05 | No  |
| ENSMUSG00000020255 | -1,00E-02 | 5,891394671  | 2,27E-02 | 8,80E-01 | 1,00E+00 | D10Wsu102e    | 0,99 | No  |
| ENSMUSG00000020256 | -5,69E-01 | -1,740826674 | 8,01E-01 | 3,71E-01 | 6,72E-01 | Aldh1l2       | 0,67 | No  |
| ENSMUSG00000020257 | 1,91E-02  | 6,645732944  | 9,53E-02 | 7,57E-01 | 9,35E-01 | Wdr82         | 1,01 | No  |
| ENSMUSG00000020258 | -5,62E-02 | 0,635797405  | 6,05E-02 | 8,06E-01 | 9,63E-01 | Glyctk        | 0,96 | No  |
| ENSMUSG00000020260 | 1,51E-01  | 5,360233206  | 4,56E+00 | 3,28E-02 | 2,12E-01 | Pofut2        | 1,11 | No  |
| ENSMUSG00000020261 | 3,34E-01  | 7,018632622  | 3,01E+01 | 4,09E-08 | 2,48E-06 | Slc36a1       | 1,26 | Yes |
| ENSMUSG00000020262 | 4,08E-01  | 2,618452558  | 1,01E+01 | 1,51E-03 | 2,24E-02 | Adarb1        | 1,33 | Yes |
| ENSMUSG00000020263 | 1,56E-01  | 5,954733254  | 5,63E+00 | 1,76E-02 | 1,39E-01 | Appl2         | 1,11 | No  |
| ENSMUSG00000020264 | 8,67E-02  | 3,335915553  | 6,82E-01 | 4,09E-01 | 7,05E-01 | Slc36a2       | 1,06 | No  |
| ENSMUSG00000020265 | -3,92E-02 | 6,300893813  | 3,80E-01 | 5,38E-01 | 8,09E-01 | Sumo3         | 0,97 | No  |
| ENSMUSG00000020267 | 4,17E-02  | 6,628433858  | 4,49E-01 | 5,03E-01 | 7,88E-01 | Hint1         | 1,03 | No  |
| ENSMUSG00000020268 | 3,14E-01  | 0,128212509  | 1,19E+00 | 2,75E-01 | 5,71E-01 | Lym7          | 1,24 | No  |
| ENSMUSG00000020271 | -8,92E-02 | 6,701133099  | 2,08E+00 | 1,50E-01 | 4,90E-01 | Fbxw11        | 0,94 | No  |
| ENSMUSG00000020272 | 3,26E-01  | 6,842862976  | 2,81E+01 | 1,17E-07 | 6,42E-06 | Stk10         | 1,25 | Yes |
| ENSMUSG00000020273 | -2,26E-01 | 4,543191374  | 8,54E+00 | 3,48E-03 | 4,27E-02 | Papolg        | 0,85 | Yes |
| ENSMUSG00000020275 | -6,08E-01 | 8,61594014   | 1,12E+02 | 3,88E-26 | 1,47E-23 | Rel           | 0,66 | Yes |
| ENSMUSG00000020277 | 1,01E-01  | 6,1641922    | 2,47E+00 | 1,16E-01 | 4,21E-01 | Pfkl          | 1,07 | No  |
| ENSMUSG00000020279 | -5,31E-01 | 0,010741848  | 3,28E+00 | 7,01E-02 | 3,34E-01 | Il9r          | 0,69 | No  |
| ENSMUSG00000020280 | -2,45E-01 | 4,574328254  | 9,73E+00 | 1,81E-03 | 2,58E-02 | Pus10         | 0,84 | Yes |
| ENSMUSG00000020282 | -3,59E-01 | 0,483723855  | 2,05E+00 | 1,52E-01 | 4,95E-01 | Rhbdf1        | 0,78 | No  |
| ENSMUSG00000020283 | -1,40E-01 | 4,643932443  | 3,22E+00 | 7,28E-02 | 3,42E-01 | Pex13         | 0,91 | No  |

|                    |           |              |           |          |          |               |      |     |
|--------------------|-----------|--------------|-----------|----------|----------|---------------|------|-----|
| ENSMUSG00000020284 | 1,39E-01  | 3,422371951  | 1,90E+00  | 1,68E-01 | 5,23E-01 | 1810043G02Rik | 1,10 | No  |
| ENSMUSG00000020286 | -3,55E+00 | -2,711700534 | 5,65E+00  | 1,75E-02 | 1,38E-01 | 1700093K21Rik | 0,09 | No  |
| ENSMUSG00000020287 | 1,03E-01  | 3,211818557  | 9,21E-01  | 3,37E-01 | 6,38E-01 | Mpg           | 1,07 | No  |
| ENSMUSG00000020288 | -4,33E-02 | 4,853275354  | 3,27E-01  | 5,68E-01 | 8,29E-01 | Ahsa2         | 0,97 | No  |
| ENSMUSG00000020289 | 1,13E-01  | 4,537687858  | 2,00E+00  | 1,58E-01 | 5,04E-01 | Nprl3         | 1,08 | No  |
| ENSMUSG00000020290 | 7,59E-02  | 7,381751671  | 1,63E+00  | 2,02E-01 | 5,50E-01 | Xpo1          | 1,05 | No  |
| ENSMUSG00000020295 | -8,69E-01 | -2,963204587 | 4,16E-01  | 5,19E-01 | 7,98E-01 | Hbq1a         | 0,55 | No  |
| ENSMUSG00000020297 | -5,99E-02 | -2,963282181 | -7,02E-11 | 1,00E+00 | 1,00E+00 | Nsg2          | 0,96 | No  |
| ENSMUSG00000020299 | 6,95E-01  | -2,355648396 | 7,01E-01  | 4,03E-01 | 7,01E-01 | 4930524B15Rik | 1,62 | No  |
| ENSMUSG00000020300 | -1,82E-01 | 7,071279388  | 9,06E+00  | 2,61E-03 | 3,45E-02 | Cpeb4         | 0,88 | Yes |
| ENSMUSG00000020303 | 7,15E-01  | -2,107696675 | 7,40E-01  | 3,90E-01 | 6,90E-01 | Stc2          | 1,64 | No  |
| ENSMUSG00000020305 | -2,00E-01 | 3,450168861  | 4,00E+00  | 4,54E-02 | 2,54E-01 | Asb3          | 0,87 | No  |
| ENSMUSG00000020307 | 1,09E-01  | 5,508867284  | 2,48E+00  | 1,15E-01 | 4,19E-01 | Cdc34         | 1,08 | No  |
| ENSMUSG00000020308 | 9,64E-02  | 4,603110217  | 1,49E+00  | 2,22E-01 | 5,50E-01 | Tpgs1         | 1,07 | No  |
| ENSMUSG00000020309 | 1,51E-01  | 2,154240066  | 1,13E+00  | 2,87E-01 | 5,83E-01 | Chac2         | 1,11 | No  |
| ENSMUSG00000020310 | -2,68E+00 | -2,963261035 | 2,84E+00  | 9,17E-02 | 3,82E-01 | Madcam1       | 0,16 | No  |
| ENSMUSG00000020311 | -7,75E-02 | 4,085840905  | 7,92E-01  | 3,73E-01 | 6,74E-01 | Erlec1        | 0,95 | No  |
| ENSMUSG00000020312 | 5,42E-01  | -1,088760876 | 1,51E+00  | 2,20E-01 | 5,50E-01 | Shc2          | 1,46 | No  |
| ENSMUSG00000020315 | 1,98E-03  | 7,797306245  | 1,14E-03  | 9,73E-01 | 1,00E+00 | Sptbn1        | 1,00 | No  |
| ENSMUSG00000020317 | -8,93E-02 | -2,96327978  | 3,63E-03  | 9,52E-01 | 1,00E+00 | Theg          | 0,94 | No  |
| ENSMUSG00000020319 | 1,94E-01  | 0,913706673  | 8,23E-01  | 3,64E-01 | 6,65E-01 | Wdpcp         | 1,14 | No  |
| ENSMUSG00000020321 | -9,93E-03 | 6,803236242  | 2,62E-02  | 8,71E-01 | 1,00E+00 | Mdh1          | 0,99 | No  |
| ENSMUSG00000020323 | 8,44E-01  | -0,395739542 | 5,42E+00  | 1,99E-02 | 1,51E-01 | Prss57        | 1,79 | No  |
| ENSMUSG00000020325 | 1,23E-01  | -0,669098309 | 1,06E-01  | 7,45E-01 | 9,29E-01 | Fstl3         | 1,09 | No  |
| ENSMUSG00000020326 | 6,35E-02  | 8,454303403  | 1,22E+00  | 2,69E-01 | 5,65E-01 | Ccng1         | 1,05 | No  |
| ENSMUSG00000020327 | 1,08E-01  | -0,620773269 | 7,96E-02  | 7,78E-01 | 9,47E-01 | Fgf22         | 1,08 | No  |
| ENSMUSG00000020328 | 6,97E-02  | 5,765309871  | 1,08E+00  | 2,99E-01 | 5,95E-01 | Nudcd2        | 1,05 | No  |
| ENSMUSG00000020329 | 1,72E-01  | 4,3944962    | 4,42E+00  | 3,56E-02 | 2,24E-01 | Polrmt        | 1,13 | No  |
| ENSMUSG00000020330 | 1,41E-01  | 5,719576093  | 4,38E+00  | 3,63E-02 | 2,26E-01 | Hmmr          | 1,10 | No  |
| ENSMUSG00000020331 | -1,69E-01 | 0,062259805  | 3,50E-01  | 5,54E-01 | 8,20E-01 | Hcn2          | 0,89 | No  |
| ENSMUSG00000020333 | -5,88E-02 | -3,033616507 | 1,62E-03  | 9,68E-01 | 1,00E+00 | Acsl6         | 0,96 | No  |
| ENSMUSG00000020334 | -2,97E-01 | 3,488202728  | 8,85E+00  | 2,94E-03 | 3,77E-02 | Slc22a4       | 0,81 | Yes |

|                    |           |              |          |          |          |            |      |     |
|--------------------|-----------|--------------|----------|----------|----------|------------|------|-----|
| ENSMUSG00000020335 | 1,85E+00  | -3,107657832 | 1,35E+00 | 2,46E-01 | 5,50E-01 | Zfp354b    | 3,61 | No  |
| ENSMUSG00000020340 | -2,67E-01 | 6,315567268  | 1,77E+01 | 2,62E-05 | 7,81E-04 | Cyfp2      | 0,83 | Yes |
| ENSMUSG00000020346 | 1,16E-01  | 6,883511405  | 3,59E+00 | 5,81E-02 | 2,97E-01 | Mgat1      | 1,08 | No  |
| ENSMUSG00000020349 | -3,58E-02 | 7,627307106  | 3,68E-01 | 5,44E-01 | 8,13E-01 | Ppp2ca     | 0,98 | No  |
| ENSMUSG00000020354 | -1,89E+00 | -3,1076441   | 1,42E+00 | 2,33E-01 | 5,50E-01 | Sgcd       | 0,27 | No  |
| ENSMUSG00000020357 | 1,99E+00  | -0,740978224 | 2,18E+01 | 3,10E-06 | 1,20E-04 | Flt4       | 3,96 | Yes |
| ENSMUSG00000020358 | 9,45E-02  | 8,163500643  | 2,66E+00 | 1,03E-01 | 3,95E-01 | Hnrnpab    | 1,07 | No  |
| ENSMUSG00000020359 | 8,54E-02  | 6,715247388  | 1,91E+00 | 1,67E-01 | 5,21E-01 | Phytpl     | 1,06 | No  |
| ENSMUSG00000020361 | 1,02E-01  | 7,671504865  | 2,98E+00 | 8,43E-02 | 3,72E-01 | Hspa4      | 1,07 | No  |
| ENSMUSG00000020362 | 5,86E-02  | 6,995672192  | 9,33E-01 | 3,34E-01 | 6,35E-01 | Cnot6      | 1,04 | No  |
| ENSMUSG00000020363 | -6,35E-02 | -0,185585351 | 4,02E-02 | 8,41E-01 | 9,84E-01 | Gfpt2      | 0,96 | No  |
| ENSMUSG00000020364 | 1,82E+00  | -3,033667329 | 1,31E+00 | 2,52E-01 | 5,50E-01 | Zfp354a    | 3,54 | No  |
| ENSMUSG00000020366 | 3,84E-02  | 6,105160436  | 3,50E-01 | 5,54E-01 | 8,20E-01 | Mapk9      | 1,03 | No  |
| ENSMUSG00000020368 | 1,43E-01  | 8,86103257   | 6,26E+00 | 1,24E-02 | 1,09E-01 | Canx       | 1,10 | No  |
| ENSMUSG00000020372 | -1,01E-01 | 9,469172542  | 3,17E+00 | 7,51E-02 | 3,49E-01 | Rack1      | 0,93 | No  |
| ENSMUSG00000020374 | -5,60E-01 | -2,655162252 | 2,46E-01 | 6,20E-01 | 8,57E-01 | Rasgef1c   | 0,68 | No  |
| ENSMUSG00000020375 | 2,08E-01  | 5,298436174  | 8,50E+00 | 3,54E-03 | 4,32E-02 | Rufy1      | 1,15 | Yes |
| ENSMUSG00000020376 | 3,55E-02  | 6,7840021    | 3,31E-01 | 5,65E-01 | 8,27E-01 | Rnf130     | 1,02 | No  |
| ENSMUSG00000020377 | -5,21E-01 | 3,192033345  | 2,40E+01 | 9,45E-07 | 4,23E-05 | Ltc4s      | 0,70 | Yes |
| ENSMUSG00000020380 | 1,77E-01  | 5,298870657  | 6,28E+00 | 1,22E-02 | 1,08E-01 | Rad50      | 1,13 | No  |
| ENSMUSG00000020381 | -5,85E-02 | 0,791496937  | 7,12E-02 | 7,90E-01 | 9,54E-01 | Mrnip      | 0,96 | No  |
| ENSMUSG00000020385 | -2,60E-02 | 5,737086437  | 1,49E-01 | 6,99E-01 | 9,04E-01 | Clk4       | 0,98 | No  |
| ENSMUSG00000020386 | 7,76E-02  | 5,098074705  | 1,12E+00 | 2,91E-01 | 5,86E-01 | Sar1b      | 1,06 | No  |
| ENSMUSG00000020387 | -6,60E-02 | 4,297733563  | 6,31E-01 | 4,27E-01 | 7,21E-01 | Jade2      | 0,96 | No  |
| ENSMUSG00000020388 | -6,91E-01 | 2,172533684  | 2,33E+01 | 1,37E-06 | 5,88E-05 | Pdlim4     | 0,62 | Yes |
| ENSMUSG00000020389 | -8,88E-02 | 0,705370028  | 1,60E-01 | 6,89E-01 | 8,99E-01 | Cdkl3      | 0,94 | No  |
| ENSMUSG00000020390 | -1,47E-01 | 5,912668586  | 5,00E+00 | 2,54E-02 | 1,77E-01 | Ube2b      | 0,90 | No  |
| ENSMUSG00000020392 | -2,97E-02 | 5,214625316  | 1,72E-01 | 6,79E-01 | 8,93E-01 | Cdkn2aipnl | 0,98 | No  |
| ENSMUSG00000020393 | -6,51E-02 | 5,40456611   | 8,76E-01 | 3,49E-01 | 6,50E-01 | Kremen1    | 0,96 | No  |
| ENSMUSG00000020395 | -1,36E+00 | -2,711658292 | 1,16E+00 | 2,81E-01 | 5,77E-01 | Itk        | 0,39 | No  |
| ENSMUSG00000020396 | -1,71E-01 | 1,183530183  | 8,07E-01 | 3,69E-01 | 6,70E-01 | Nefh       | 0,89 | No  |
| ENSMUSG00000020397 | -2,46E-02 | 3,542712343  | 6,31E-02 | 8,02E-01 | 9,61E-01 | Med7       | 0,98 | No  |

|                    |           |              |          |          |          |               |      |     |
|--------------------|-----------|--------------|----------|----------|----------|---------------|------|-----|
| ENSMUSG00000020399 | 4,94E-01  | 4,253334451  | 3,25E+01 | 1,17E-08 | 8,04E-07 | Havcr2        | 1,41 | Yes |
| ENSMUSG00000020400 | -1,97E-01 | 6,508752132  | 9,89E+00 | 1,67E-03 | 2,42E-02 | Tnip1         | 0,87 | Yes |
| ENSMUSG00000020401 | -2,55E-02 | -2,711712527 | 5,34E-04 | 9,82E-01 | 1,00E+00 | Fam71b        | 0,98 | No  |
| ENSMUSG00000020402 | 5,59E-02  | 7,493905241  | 8,89E-01 | 3,46E-01 | 6,47E-01 | Vdac1         | 1,04 | No  |
| ENSMUSG00000020407 | -6,77E-02 | 3,531242421  | 4,66E-01 | 4,95E-01 | 7,80E-01 | Upp1          | 0,95 | No  |
| ENSMUSG00000020409 | -5,18E-02 | 5,699271618  | 5,91E-01 | 4,42E-01 | 7,34E-01 | Slu7          | 0,96 | No  |
| ENSMUSG00000020411 | -1,36E+00 | -2,548126199 | 1,17E+00 | 2,80E-01 | 5,77E-01 | Nipal4        | 0,39 | No  |
| ENSMUSG00000020412 | 1,15E-01  | 6,298025858  | 3,29E+00 | 6,99E-02 | 3,34E-01 | Ascc2         | 1,08 | No  |
| ENSMUSG00000020413 | 4,99E-02  | 4,10669354   | 3,26E-01 | 5,68E-01 | 8,29E-01 | Hus1          | 1,04 | No  |
| ENSMUSG00000020415 | -7,42E-02 | 3,611568233  | 5,98E-01 | 4,39E-01 | 7,32E-01 | Pttg1         | 0,95 | No  |
| ENSMUSG00000020419 | 4,41E-01  | -2,711701398 | 1,52E-01 | 6,97E-01 | 9,03E-01 | Hormad2       | 1,36 | No  |
| ENSMUSG00000020420 | 1,27E-02  | 2,267846257  | 8,95E-03 | 9,25E-01 | 1,00E+00 | Zfp607a       | 1,01 | No  |
| ENSMUSG00000020422 | 1,92E-01  | 7,148084834  | 1,02E+01 | 1,42E-03 | 2,14E-02 | Tns3          | 1,14 | Yes |
| ENSMUSG00000020423 | 3,89E-01  | 6,441511976  | 3,84E+01 | 5,72E-10 | 4,81E-08 | Btg2          | 1,31 | Yes |
| ENSMUSG00000020424 | -3,69E-01 | 2,229884566  | 7,19E+00 | 7,33E-03 | 7,42E-02 | Gatsl3        | 0,77 | No  |
| ENSMUSG00000020427 | -7,98E-01 | -2,770529399 | 3,51E-01 | 5,54E-01 | 8,19E-01 | Igfbp3        | 0,58 | No  |
| ENSMUSG00000020430 | 2,96E-02  | 5,453679416  | 1,82E-01 | 6,70E-01 | 8,88E-01 | Pes1          | 1,02 | No  |
| ENSMUSG00000020432 | 1,04E-02  | 6,552924498  | 2,75E-02 | 8,68E-01 | 1,00E+00 | Tcn2          | 1,01 | No  |
| ENSMUSG00000020434 | 2,20E-01  | -0,389976269 | 3,98E-01 | 5,28E-01 | 8,04E-01 | 4921536K21Rik | 1,16 | No  |
| ENSMUSG00000020435 | -3,29E-01 | -0,668978647 | 7,17E-01 | 3,97E-01 | 6,97E-01 | Osbp2         | 0,80 | No  |
| ENSMUSG00000020437 | -4,06E-01 | 9,431284326  | 5,15E+01 | 7,01E-13 | 8,68E-11 | Myo1g         | 0,75 | Yes |
| ENSMUSG00000020439 | 3,47E-01  | 1,899044519  | 4,95E+00 | 2,62E-02 | 1,81E-01 | Smtn          | 1,27 | No  |
| ENSMUSG00000020440 | 5,52E-04  | 6,861659163  | 8,16E-05 | 9,93E-01 | 1,00E+00 | Arf5          | 1,00 | No  |
| ENSMUSG00000020441 | 1,03E-01  | 2,978025982  | 8,13E-01 | 3,67E-01 | 6,68E-01 | 2310033P09Rik | 1,07 | No  |
| ENSMUSG00000020444 | 7,07E-02  | 4,536674677  | 7,81E-01 | 3,77E-01 | 6,78E-01 | Guk1          | 1,05 | No  |
| ENSMUSG00000020447 | -1,35E+00 | -2,655140323 | 1,14E+00 | 2,86E-01 | 5,82E-01 | Npc1l1        | 0,39 | No  |
| ENSMUSG00000020448 | 7,72E-02  | 4,717828541  | 1,01E+00 | 3,15E-01 | 6,15E-01 | Rnf185        | 1,05 | No  |
| ENSMUSG00000020451 | -4,72E-02 | 5,275641427  | 4,45E-01 | 5,05E-01 | 7,89E-01 | Limk2         | 0,97 | No  |
| ENSMUSG00000020453 | 1,08E-01  | 4,264842467  | 1,66E+00 | 1,98E-01 | 5,50E-01 | Patz1         | 1,08 | No  |
| ENSMUSG00000020454 | 3,05E-02  | 5,816388799  | 2,10E-01 | 6,47E-01 | 8,74E-01 | Eif4enif1     | 1,02 | No  |
| ENSMUSG00000020455 | 1,21E-01  | 5,458412988  | 3,03E+00 | 8,18E-02 | 3,67E-01 | Trim11        | 1,09 | No  |
| ENSMUSG00000020456 | 9,56E-02  | 7,787083983  | 2,66E+00 | 1,03E-01 | 3,95E-01 | Ogdh          | 1,07 | No  |

|                    |           |              |          |          |          |               |      |     |
|--------------------|-----------|--------------|----------|----------|----------|---------------|------|-----|
| ENSMUSG00000020457 | 9,13E-03  | 5,698731411  | 1,83E-02 | 8,92E-01 | 1,00E+00 | Drg1          | 1,01 | No  |
| ENSMUSG00000020458 | -3,89E-02 | 8,05504733   | 4,48E-01 | 5,04E-01 | 7,88E-01 | Rtn4          | 0,97 | No  |
| ENSMUSG00000020459 | 1,02E-01  | 4,809754514  | 1,78E+00 | 1,82E-01 | 5,44E-01 | Mtif2         | 1,07 | No  |
| ENSMUSG00000020460 | -1,70E-01 | 4,920416968  | 5,20E+00 | 2,26E-02 | 1,63E-01 | Rps27a        | 0,89 | No  |
| ENSMUSG00000020461 | 1,51E-01  | -1,48524039  | 7,48E-02 | 7,85E-01 | 9,51E-01 | Clhc1         | 1,11 | No  |
| ENSMUSG00000020462 | -2,00E-01 | 3,699166943  | 4,36E+00 | 3,69E-02 | 2,28E-01 | Cfap36        | 0,87 | No  |
| ENSMUSG00000020463 | 1,01E-01  | 6,551556739  | 2,61E+00 | 1,06E-01 | 3,99E-01 | Ppp4r3b       | 1,07 | No  |
| ENSMUSG00000020464 | -5,32E-02 | 3,998999523  | 3,54E-01 | 5,52E-01 | 8,18E-01 | Pnpt1         | 0,96 | No  |
| ENSMUSG00000020469 | 1,84E+00  | -3,033649193 | 1,33E+00 | 2,49E-01 | 5,50E-01 | Myl7          | 3,58 | No  |
| ENSMUSG00000020471 | 1,17E-01  | 4,281560894  | 1,92E+00 | 1,66E-01 | 5,19E-01 | Pold2         | 1,08 | No  |
| ENSMUSG00000020472 | -2,52E-02 | 5,812743987  | 1,42E-01 | 7,06E-01 | 9,08E-01 | Zkscan17      | 0,98 | No  |
| ENSMUSG00000020473 | -1,70E+00 | -0,770330257 | 1,64E+01 | 5,18E-05 | 1,40E-03 | Aebp1         | 0,31 | Yes |
| ENSMUSG00000020474 | 8,93E-02  | 3,944566715  | 1,01E+00 | 3,15E-01 | 6,15E-01 | Polm          | 1,06 | No  |
| ENSMUSG00000020475 | -1,26E-01 | 3,004799217  | 1,23E+00 | 2,67E-01 | 5,63E-01 | Pgam2         | 0,92 | No  |
| ENSMUSG00000020476 | -1,26E-01 | 7,346797031  | 4,47E+00 | 3,46E-02 | 2,19E-01 | Dbnl          | 0,92 | No  |
| ENSMUSG00000020477 | 7,34E-02  | 4,624472446  | 8,70E-01 | 3,51E-01 | 6,52E-01 | Mrps24        | 1,05 | No  |
| ENSMUSG00000020481 | -6,87E-01 | -2,070084575 | 1,08E+00 | 3,00E-01 | 5,96E-01 | Ankrd36       | 0,62 | No  |
| ENSMUSG00000020482 | 9,15E-03  | 4,919545296  | 1,51E-02 | 9,02E-01 | 1,00E+00 | Ccdc117       | 1,01 | No  |
| ENSMUSG00000020483 | -2,49E-01 | 6,742259468  | 1,65E+01 | 4,96E-05 | 1,35E-03 | Dynll2        | 0,84 | Yes |
| ENSMUSG00000020484 | -7,40E-02 | 8,849502109  | 1,68E+00 | 1,95E-01 | 5,50E-01 | Xbp1          | 0,95 | No  |
| ENSMUSG00000020485 | -3,08E-01 | 4,813662659  | 1,66E+01 | 4,71E-05 | 1,30E-03 | Supt4a        | 0,81 | Yes |
| ENSMUSG00000020486 | -1,20E+00 | 2,997996426  | 1,13E+02 | 2,39E-26 | 9,30E-24 | SEPT4         | 0,44 | Yes |
| ENSMUSG00000020491 | 7,23E-02  | 2,602074403  | 3,32E-01 | 5,65E-01 | 8,27E-01 | 2810021J22Rik | 1,05 | No  |
| ENSMUSG00000020492 | 2,45E-01  | 3,439038701  | 5,97E+00 | 1,45E-02 | 1,23E-01 | Ska2          | 1,19 | No  |
| ENSMUSG00000020493 | 2,33E-01  | 5,120693554  | 1,03E+01 | 1,35E-03 | 2,06E-02 | Prr11         | 1,18 | Yes |
| ENSMUSG00000020495 | -1,24E-02 | 4,964767995  | 2,82E-02 | 8,67E-01 | 9,99E-01 | Smg8          | 0,99 | No  |
| ENSMUSG00000020496 | 5,76E-02  | 6,846462687  | 8,82E-01 | 3,48E-01 | 6,49E-01 | Rnf187        | 1,04 | No  |
| ENSMUSG00000020513 | 1,79E-01  | 2,638832026  | 2,05E+00 | 1,52E-01 | 4,94E-01 | Tubd1         | 1,13 | No  |
| ENSMUSG00000020514 | 5,41E-02  | 2,326936478  | 1,60E-01 | 6,89E-01 | 8,99E-01 | Mrpl22        | 1,04 | No  |
| ENSMUSG00000020515 | 4,59E-02  | 5,371659814  | 4,31E-01 | 5,11E-01 | 7,94E-01 | Cnot8         | 1,03 | No  |
| ENSMUSG00000020516 | -3,95E-03 | 5,595517109  | 3,34E-03 | 9,54E-01 | 1,00E+00 | Rps6kb1       | 1,00 | No  |
| ENSMUSG00000020519 | 1,05E-01  | 4,073466728  | 1,45E+00 | 2,28E-01 | 5,50E-01 | Sap30l        | 1,08 | No  |



|                    |           |              |          |          |          |          |      |     |
|--------------------|-----------|--------------|----------|----------|----------|----------|------|-----|
| ENSMUSG00000020520 | 3,04E-01  | 5,964631634  | 2,14E+01 | 3,82E-06 | 1,44E-04 | Galnt10  | 1,23 | Yes |
| ENSMUSG00000020521 | 1,24E-01  | 5,786091739  | 3,45E+00 | 6,32E-02 | 3,14E-01 | Rnft1    | 1,09 | No  |
| ENSMUSG00000020522 | 1,88E-01  | 6,115202805  | 8,46E+00 | 3,62E-03 | 4,40E-02 | Mfap3    | 1,14 | Yes |
| ENSMUSG00000020523 | 6,61E-03  | 5,623315086  | 9,44E-03 | 9,23E-01 | 1,00E+00 | Fam114a2 | 1,00 | No  |
| ENSMUSG00000020525 | 1,51E-01  | 4,185220209  | 3,20E+00 | 7,36E-02 | 3,45E-01 | Ppm1d    | 1,11 | No  |
| ENSMUSG00000020526 | 1,38E-01  | 2,97989903   | 1,46E+00 | 2,27E-01 | 5,50E-01 | Znhit3   | 1,10 | No  |
| ENSMUSG00000020527 | 3,61E-01  | 3,548887523  | 1,32E+01 | 2,86E-04 | 5,82E-03 | Myo19    | 1,28 | Yes |
| ENSMUSG00000020528 | -1,91E-02 | 3,392222092  | 3,57E-02 | 8,50E-01 | 9,89E-01 | Prpsap2  | 0,99 | No  |
| ENSMUSG00000020530 | -8,83E-02 | 6,598325275  | 2,01E+00 | 1,57E-01 | 5,01E-01 | Ggnbp2   | 0,94 | No  |
| ENSMUSG00000020532 | 1,55E-01  | 5,380529407  | 4,86E+00 | 2,75E-02 | 1,87E-01 | Acaca    | 1,11 | No  |
| ENSMUSG00000020534 | 3,90E-02  | 3,597721466  | 1,58E-01 | 6,91E-01 | 9,00E-01 | Shmt1    | 1,03 | No  |
| ENSMUSG00000020536 | -1,17E-01 | 5,154910117  | 2,61E+00 | 1,06E-01 | 3,99E-01 | Llg1     | 0,92 | No  |
| ENSMUSG00000020537 | 2,36E-02  | 4,562932495  | 8,81E-02 | 7,67E-01 | 9,40E-01 | Drg2     | 1,02 | No  |
| ENSMUSG00000020538 | 2,84E-01  | 7,20340748   | 2,22E+01 | 2,48E-06 | 9,76E-05 | Srebf1   | 1,22 | Yes |
| ENSMUSG00000020541 | 8,83E-02  | 2,264602541  | 4,09E-01 | 5,23E-01 | 8,01E-01 | Tom1l1   | 1,06 | No  |
| ENSMUSG00000020544 | -1,20E-01 | 2,861776199  | 1,06E+00 | 3,04E-01 | 6,01E-01 | Cox11    | 0,92 | No  |
| ENSMUSG00000020545 | -8,86E-02 | -2,963249454 | 3,57E-03 | 9,52E-01 | 1,00E+00 | Lrrc72   | 0,94 | No  |
| ENSMUSG00000020546 | -1,41E-01 | 1,904124549  | 7,74E-01 | 3,79E-01 | 6,80E-01 | Stxbp4   | 0,91 | No  |
| ENSMUSG00000020547 | -8,22E-03 | 4,988855016  | 1,22E-02 | 9,12E-01 | 1,00E+00 | Bzw2     | 0,99 | No  |
| ENSMUSG00000020549 | 2,24E-02  | 4,57358505   | 7,93E-02 | 7,78E-01 | 9,47E-01 | Elac2    | 1,02 | No  |
| ENSMUSG00000020553 | 3,83E-02  | 4,747544749  | 2,46E-01 | 6,20E-01 | 8,57E-01 | Pctp     | 1,03 | No  |
| ENSMUSG00000020561 | 5,97E-02  | 4,661518133  | 5,80E-01 | 4,46E-01 | 7,37E-01 | Twistnb  | 1,04 | No  |
| ENSMUSG00000020564 | -2,65E-01 | 6,177627853  | 1,70E+01 | 3,75E-05 | 1,06E-03 | Atxn7l1  | 0,83 | Yes |
| ENSMUSG00000020566 | 6,80E-01  | -1,770634609 | 1,17E+00 | 2,79E-01 | 5,76E-01 | Atp6v1c2 | 1,60 | No  |
| ENSMUSG00000020570 | 1,25E-01  | 6,246311126  | 3,77E+00 | 5,22E-02 | 2,78E-01 | Sypl     | 1,09 | No  |
| ENSMUSG00000020571 | 1,02E-01  | 7,854304265  | 3,03E+00 | 8,17E-02 | 3,67E-01 | Pdia6    | 1,07 | No  |
| ENSMUSG00000020572 | 1,04E-01  | 7,681326786  | 3,13E+00 | 7,70E-02 | 3,54E-01 | Nampt    | 1,08 | No  |
| ENSMUSG00000020573 | -1,43E-02 | 8,071634807  | 6,07E-02 | 8,05E-01 | 9,63E-01 | Pik3cg   | 0,99 | No  |
| ENSMUSG00000020576 | 8,60E-02  | 4,617407146  | 1,19E+00 | 2,75E-01 | 5,72E-01 | Nbas     | 1,06 | No  |
| ENSMUSG00000020577 | -6,32E-01 | 4,061952764  | 5,47E+01 | 1,43E-13 | 1,95E-11 | Tspan13  | 0,65 | Yes |
| ENSMUSG00000020580 | -3,05E-02 | 6,990463119  | 2,52E-01 | 6,16E-01 | 8,54E-01 | Rock2    | 0,98 | No  |
| ENSMUSG00000020583 | 1,22E+00  | -2,896168849 | 9,19E-01 | 3,38E-01 | 6,38E-01 | Matn3    | 2,33 | No  |

|                    |           |              |          |          |          |               |      |     |
|--------------------|-----------|--------------|----------|----------|----------|---------------|------|-----|
| ENSMUSG00000020585 | -2,41E-02 | 7,478845208  | 1,65E-01 | 6,85E-01 | 8,97E-01 | Laptm4a       | 0,98 | No  |
| ENSMUSG00000020589 | -4,23E-01 | 6,348530568  | 4,49E+01 | 2,09E-11 | 2,14E-09 | Fam49a        | 0,75 | Yes |
| ENSMUSG00000020590 | 1,29E-01  | 5,64725416   | 3,63E+00 | 5,69E-02 | 2,93E-01 | Snx13         | 1,09 | No  |
| ENSMUSG00000020592 | -2,91E-01 | 6,417110961  | 2,11E+01 | 4,26E-06 | 1,58E-04 | Sdc1          | 0,82 | Yes |
| ENSMUSG00000020593 | 3,36E-01  | 5,965520507  | 2,62E+01 | 3,09E-07 | 1,54E-05 | Lpin1         | 1,26 | Yes |
| ENSMUSG00000020594 | 5,56E-02  | 7,770792914  | 9,02E-01 | 3,42E-01 | 6,43E-01 | Pum2          | 1,04 | No  |
| ENSMUSG00000020598 | -8,33E-01 | -0,963228689 | 3,77E+00 | 5,22E-02 | 2,78E-01 | Nrcam         | 0,56 | No  |
| ENSMUSG00000020599 | 1,42E+00  | -0,378389802 | 1,46E+01 | 1,36E-04 | 3,13E-03 | Rgs9          | 2,67 | Yes |
| ENSMUSG00000020600 | 6,46E-01  | -0,655014231 | 2,59E+00 | 1,07E-01 | 4,01E-01 | Slc7a15       | 1,56 | No  |
| ENSMUSG00000020601 | 9,19E-01  | -0,00697814  | 9,53E+00 | 2,02E-03 | 2,83E-02 | Trib2         | 1,89 | Yes |
| ENSMUSG00000020604 | -2,64E-01 | 1,881374337  | 2,87E+00 | 9,04E-02 | 3,81E-01 | Arsg          | 0,83 | No  |
| ENSMUSG00000020605 | 1,69E-01  | 5,010221477  | 5,30E+00 | 2,13E-02 | 1,57E-01 | Hs1bp3        | 1,12 | No  |
| ENSMUSG00000020608 | 3,21E-02  | 6,64362592   | 2,68E-01 | 6,05E-01 | 8,49E-01 | Smc6          | 1,02 | No  |
| ENSMUSG00000020609 | -4,13E-02 | -3,033659495 | 7,08E-04 | 9,79E-01 | 1,00E+00 | Apob          | 0,97 | No  |
| ENSMUSG00000020610 | 4,27E-02  | 4,882677372  | 3,19E-01 | 5,72E-01 | 8,32E-01 | Amz2          | 1,03 | No  |
| ENSMUSG00000020611 | -7,68E-02 | 7,877750363  | 1,73E+00 | 1,89E-01 | 5,50E-01 | Gna13         | 0,95 | No  |
| ENSMUSG00000020612 | -4,13E-02 | 8,074205598  | 5,06E-01 | 4,77E-01 | 7,65E-01 | Prkar1a       | 0,97 | No  |
| ENSMUSG00000020614 | 4,80E-01  | -2,033612225 | 4,46E-01 | 5,04E-01 | 7,89E-01 | Fam20a        | 1,39 | No  |
| ENSMUSG00000020617 | 1,17E+00  | -3,14612376  | 6,40E-01 | 4,24E-01 | 7,18E-01 | 1700012B07Rik | 2,26 | No  |
| ENSMUSG00000020620 | -2,20E-01 | 0,894911973  | 1,10E+00 | 2,94E-01 | 5,89E-01 | Abca8b        | 0,86 | No  |
| ENSMUSG00000020621 | 1,24E-01  | 3,200450731  | 1,36E+00 | 2,43E-01 | 5,50E-01 | Rdh14         | 1,09 | No  |
| ENSMUSG00000020622 | -1,22E+00 | -2,655152082 | 1,43E+00 | 2,32E-01 | 5,50E-01 | Nt5c1b        | 0,43 | No  |
| ENSMUSG00000020623 | 5,02E-01  | 1,532949466  | 7,64E+00 | 5,69E-03 | 6,15E-02 | Map2k6        | 1,42 | No  |
| ENSMUSG00000020627 | -5,66E-01 | -2,655104584 | 2,51E-01 | 6,17E-01 | 8,55E-01 | Klhl29        | 0,68 | No  |
| ENSMUSG00000020628 | -8,72E-02 | 5,867607058  | 1,75E+00 | 1,86E-01 | 5,50E-01 | Trappc12      | 0,94 | No  |
| ENSMUSG00000020629 | 3,53E-02  | 5,087828878  | 2,36E-01 | 6,27E-01 | 8,61E-01 | Adi1          | 1,02 | No  |
| ENSMUSG00000020630 | -1,72E-02 | 3,837122502  | 3,53E-02 | 8,51E-01 | 9,90E-01 | Rnaseh1       | 0,99 | No  |
| ENSMUSG00000020634 | -2,01E-01 | 5,395030334  | 8,29E+00 | 3,98E-03 | 4,71E-02 | Ubxn2a        | 0,87 | Yes |
| ENSMUSG00000020635 | 1,68E-02  | 4,189072564  | 3,94E-02 | 8,43E-01 | 9,85E-01 | Fkbp1b        | 1,01 | No  |
| ENSMUSG00000020638 | -2,27E-01 | 2,583163437  | 3,35E+00 | 6,71E-02 | 3,26E-01 | Cmpk2         | 0,85 | No  |
| ENSMUSG00000020639 | -8,00E-01 | -1,816355046 | 1,23E+00 | 2,68E-01 | 5,65E-01 | Pfn4          | 0,57 | No  |
| ENSMUSG00000020640 | 5,60E-02  | 7,735502506  | 9,10E-01 | 3,40E-01 | 6,41E-01 | Itsn2         | 1,04 | No  |

|                    |           |              |           |          |          |         |       |     |
|--------------------|-----------|--------------|-----------|----------|----------|---------|-------|-----|
| ENSMUSG00000020641 | -6,48E-01 | 3,509954054  | 4,37E+01  | 3,91E-11 | 3,89E-09 | Rsad2   | 0,64  | Yes |
| ENSMUSG00000020642 | -8,23E-02 | -2,107697469 | 1,09E-02  | 9,17E-01 | 1,00E+00 | Rnf144a | 0,94  | No  |
| ENSMUSG00000020644 | -1,66E-01 | 8,891259507  | 8,51E+00  | 3,53E-03 | 4,32E-02 | Id2     | 0,89  | Yes |
| ENSMUSG00000020646 | 3,84E+00  | -2,770625943 | 6,81E+00  | 9,06E-03 | 8,68E-02 | Mboat2  | 14,30 | No  |
| ENSMUSG00000020647 | -7,53E-03 | 5,7872324    | 1,25E-02  | 9,11E-01 | 1,00E+00 | Ncoa1   | 0,99  | No  |
| ENSMUSG00000020648 | 2,48E-01  | 1,658354432  | 2,24E+00  | 1,35E-01 | 4,62E-01 | Dus4l   | 1,19  | No  |
| ENSMUSG00000020649 | 1,40E-01  | 6,530524961  | 4,95E+00  | 2,60E-02 | 1,80E-01 | Rrm2    | 1,10  | No  |
| ENSMUSG00000020650 | 7,19E-02  | 5,649715906  | 1,12E+00  | 2,89E-01 | 5,85E-01 | Bcap29  | 1,05  | No  |
| ENSMUSG00000020651 | -3,80E-01 | -1,497405064 | 4,86E-01  | 4,86E-01 | 7,73E-01 | Slc26a4 | 0,77  | No  |
| ENSMUSG00000020652 | 1,10E-01  | 4,126438366  | 1,62E+00  | 2,03E-01 | 5,50E-01 | Cenpo   | 1,08  | No  |
| ENSMUSG00000020653 | 2,15E-01  | 3,199040968  | 3,84E+00  | 5,01E-02 | 2,71E-01 | Klf11   | 1,16  | No  |
| ENSMUSG00000020654 | 3,43E-01  | 2,648919883  | 7,42E+00  | 6,45E-03 | 6,76E-02 | Adcy3   | 1,27  | No  |
| ENSMUSG00000020656 | 2,48E-02  | 1,610619788  | 2,10E-02  | 8,85E-01 | 1,00E+00 | Grhl1   | 1,02  | No  |
| ENSMUSG00000020657 | 6,30E-02  | 2,913292337  | 3,01E-01  | 5,83E-01 | 8,38E-01 | Dnajc27 | 1,04  | No  |
| ENSMUSG00000020658 | 1,51E-01  | 2,436471086  | 1,37E+00  | 2,41E-01 | 5,50E-01 | Efr3b   | 1,11  | No  |
| ENSMUSG00000020659 | -6,18E-03 | 3,904155633  | 4,68E-03  | 9,45E-01 | 1,00E+00 | Cbll1   | 1,00  | No  |
| ENSMUSG00000020660 | 4,16E-01  | -1,195632939 | 6,87E-01  | 4,07E-01 | 7,04E-01 | Pomc    | 1,33  | No  |
| ENSMUSG00000020661 | -7,37E-02 | 7,706908051  | 1,58E+00  | 2,09E-01 | 5,50E-01 | Dnmt3a  | 0,95  | No  |
| ENSMUSG00000020664 | 2,17E-02  | 6,222821542  | 1,14E-01  | 7,35E-01 | 9,24E-01 | Dld     | 1,02  | No  |
| ENSMUSG00000020668 | -2,25E-01 | 3,71729958   | 5,69E+00  | 1,71E-02 | 1,36E-01 | Kif3c   | 0,86  | No  |
| ENSMUSG00000020669 | -3,09E-01 | -0,155910131 | 1,05E+00  | 3,04E-01 | 6,01E-01 | Sh3yl1  | 0,81  | No  |
| ENSMUSG00000020671 | -1,16E-01 | 7,299582876  | 3,79E+00  | 5,16E-02 | 2,76E-01 | Rab10   | 0,92  | No  |
| ENSMUSG00000020674 | -5,67E-02 | -2,831986495 | 2,17E-03  | 9,63E-01 | 1,00E+00 | Pxdn    | 0,96  | No  |
| ENSMUSG00000020676 | 9,01E-03  | -3,107646452 | -5,16E-10 | 1,00E+00 | 1,00E+00 | Ccl11   | 1,01  | No  |
| ENSMUSG00000020677 | -5,86E-02 | 5,281634325  | 6,79E-01  | 4,10E-01 | 7,06E-01 | Ddx52   | 0,96  | No  |
| ENSMUSG00000020679 | -8,38E-01 | -1,896174176 | 1,90E+00  | 1,68E-01 | 5,22E-01 | Hnf1b   | 0,56  | No  |
| ENSMUSG00000020680 | -1,05E-01 | 5,593913691  | 2,36E+00  | 1,25E-01 | 4,42E-01 | Taf15   | 0,93  | No  |
| ENSMUSG00000020681 | 7,02E-01  | 3,46920208   | 4,61E+01  | 1,10E-11 | 1,15E-09 | Ace     | 1,63  | Yes |
| ENSMUSG00000020682 | 6,92E-01  | -0,407279257 | 3,82E+00  | 5,08E-02 | 2,73E-01 | Mmp28   | 1,62  | No  |
| ENSMUSG00000020684 | -6,07E-01 | -1,126741235 | 1,86E+00  | 1,72E-01 | 5,29E-01 | Rasl10b | 0,66  | No  |
| ENSMUSG00000020686 | -3,83E-02 | -3,107651936 | -7,91E-11 | 1,00E+00 | 1,00E+00 | Gas2l2  | 0,97  | No  |
| ENSMUSG00000020687 | 8,62E-02  | 5,973322322  | 1,73E+00  | 1,88E-01 | 5,50E-01 | Cdc27   | 1,06  | No  |

|                    |           |              |          |          |          |               |      |     |
|--------------------|-----------|--------------|----------|----------|----------|---------------|------|-----|
| ENSMUSG00000020689 | -6,00E-01 | 2,34077886   | 2,04E+01 | 6,24E-06 | 2,19E-04 | ltgb3         | 0,66 | Yes |
| ENSMUSG00000020691 | -3,19E-02 | 3,741485334  | 1,17E-01 | 7,33E-01 | 9,23E-01 | Mettl2        | 0,98 | No  |
| ENSMUSG00000020692 | 7,48E-02  | 3,534999965  | 5,60E-01 | 4,54E-01 | 7,44E-01 | Nle1          | 1,05 | No  |
| ENSMUSG00000020694 | -4,86E-02 | 4,842612695  | 4,11E-01 | 5,21E-01 | 8,00E-01 | Tlk2          | 0,97 | No  |
| ENSMUSG00000020695 | -4,99E-01 | -0,509911679 | 1,95E+00 | 1,62E-01 | 5,12E-01 | Mrc2          | 0,71 | No  |
| ENSMUSG00000020696 | 3,48E-02  | 4,504139769  | 1,85E-01 | 6,67E-01 | 8,86E-01 | Rffl          | 1,02 | No  |
| ENSMUSG00000020697 | 7,25E-02  | 4,818536542  | 9,11E-01 | 3,40E-01 | 6,41E-01 | Lig3          | 1,05 | No  |
| ENSMUSG00000020698 | 7,67E-01  | -1,726176939 | 1,61E+00 | 2,04E-01 | 5,50E-01 | Cct6b         | 1,70 | No  |
| ENSMUSG00000020700 | -3,75E-02 | 6,504993597  | 3,59E-01 | 5,49E-01 | 8,16E-01 | Map3k3        | 0,97 | No  |
| ENSMUSG00000020701 | -1,87E+00 | -3,107637761 | 1,39E+00 | 2,38E-01 | 5,50E-01 | Tmem132e      | 0,27 | No  |
| ENSMUSG00000020702 | -9,55E-01 | -2,711690055 | 7,99E-01 | 3,71E-01 | 6,72E-01 | Ccl1          | 0,52 | No  |
| ENSMUSG00000020703 | 1,85E+00  | -3,107657832 | 1,35E+00 | 2,46E-01 | 5,50E-01 | 5530401A14Rik | 3,61 | No  |
| ENSMUSG00000020705 | 1,99E-03  | 6,32780603   | 9,80E-04 | 9,75E-01 | 1,00E+00 | Ddx42         | 1,00 | No  |
| ENSMUSG00000020706 | 3,18E-02  | 5,55349379   | 2,13E-01 | 6,44E-01 | 8,72E-01 | Ftsj3         | 1,02 | No  |
| ENSMUSG00000020707 | -9,26E-02 | 3,248842709  | 8,07E-01 | 3,69E-01 | 6,70E-01 | Rnf135        | 0,94 | No  |
| ENSMUSG00000020708 | -4,98E-02 | 5,721221151  | 5,45E-01 | 4,60E-01 | 7,49E-01 | Psmc5         | 0,97 | No  |
| ENSMUSG00000020709 | -1,61E-02 | 3,404477011  | 2,41E-02 | 8,77E-01 | 1,00E+00 | Adap2         | 0,99 | No  |
| ENSMUSG00000020712 | -1,33E+00 | -1,863693165 | 3,04E+00 | 8,14E-02 | 3,66E-01 | Tcam1         | 0,40 | No  |
| ENSMUSG00000020713 | -1,19E+00 | -2,268035937 | 2,29E+00 | 1,30E-01 | 4,54E-01 | Gh            | 0,44 | No  |
| ENSMUSG00000020715 | -1,92E-02 | 5,661880006  | 8,12E-02 | 7,76E-01 | 9,45E-01 | Ern1          | 0,99 | No  |
| ENSMUSG00000020716 | 3,64E-02  | 5,819008389  | 2,96E-01 | 5,86E-01 | 8,40E-01 | Nf1           | 1,03 | No  |
| ENSMUSG00000020717 | 3,05E-01  | 2,256339507  | 4,58E+00 | 3,23E-02 | 2,09E-01 | Pecam1        | 1,24 | No  |
| ENSMUSG00000020718 | 1,82E-01  | 2,571362855  | 2,06E+00 | 1,51E-01 | 4,93E-01 | Polg2         | 1,13 | No  |
| ENSMUSG00000020719 | -1,16E-01 | 9,542348655  | 4,22E+00 | 4,00E-02 | 2,38E-01 | Ddx5          | 0,92 | No  |
| ENSMUSG00000020720 | 5,19E-03  | 5,630940233  | 5,81E-03 | 9,39E-01 | 1,00E+00 | Psmd12        | 1,00 | No  |
| ENSMUSG00000020721 | -7,15E-02 | 5,744282423  | 1,14E+00 | 2,86E-01 | 5,82E-01 | Helz          | 0,95 | No  |
| ENSMUSG00000020723 | -5,25E-02 | -3,033661434 | 4,08E-11 | 1,00E+00 | 1,00E+00 | Cacng4        | 0,96 | No  |
| ENSMUSG00000020728 | -4,07E-01 | -1,600617323 | 5,19E-01 | 4,71E-01 | 7,60E-01 | Cep112        | 0,75 | No  |
| ENSMUSG00000020732 | 2,69E-01  | 1,399279933  | 1,99E+00 | 1,58E-01 | 5,05E-01 | Rab37         | 1,21 | No  |
| ENSMUSG00000020733 | 2,73E-02  | 7,117881492  | 2,05E-01 | 6,51E-01 | 8,76E-01 | Slc9a3r1      | 1,02 | No  |
| ENSMUSG00000020734 | -1,09E+00 | 0,362327624  | 1,93E+01 | 1,12E-05 | 3,72E-04 | Grin2c        | 0,47 | Yes |
| ENSMUSG00000020736 | -1,26E-01 | 5,632965714  | 3,42E+00 | 6,43E-02 | 3,17E-01 | Nt5c          | 0,92 | No  |

|                    |           |              |          |          |          |          |      |     |
|--------------------|-----------|--------------|----------|----------|----------|----------|------|-----|
| ENSMUSG00000020737 | 1,03E-02  | 7,433293293  | 2,98E-02 | 8,63E-01 | 9,97E-01 | Jpt1     | 1,01 | No  |
| ENSMUSG00000020738 | -1,45E-01 | 4,878899307  | 3,71E+00 | 5,41E-02 | 2,84E-01 | Sumo2    | 0,90 | No  |
| ENSMUSG00000020739 | -3,71E-02 | 5,357493428  | 2,79E-01 | 5,97E-01 | 8,45E-01 | Nup85    | 0,97 | No  |
| ENSMUSG00000020740 | -1,25E-01 | 5,773122152  | 3,52E+00 | 6,07E-02 | 3,05E-01 | Gga3     | 0,92 | No  |
| ENSMUSG00000020741 | 1,01E-01  | 6,914297816  | 2,75E+00 | 9,70E-02 | 3,88E-01 | Cluh     | 1,07 | No  |
| ENSMUSG00000020743 | -2,11E-01 | 5,588609297  | 9,58E+00 | 1,97E-03 | 2,76E-02 | Mif4gd   | 0,86 | Yes |
| ENSMUSG00000020744 | -5,00E-02 | 4,783181443  | 4,26E-01 | 5,14E-01 | 7,96E-01 | Slc25a19 | 0,97 | No  |
| ENSMUSG00000020745 | 1,03E-02  | 7,292992466  | 2,95E-02 | 8,64E-01 | 9,97E-01 | Pafah1b1 | 1,01 | No  |
| ENSMUSG00000020747 | 9,67E-02  | 5,457272859  | 1,94E+00 | 1,64E-01 | 5,15E-01 | Tmem94   | 1,07 | No  |
| ENSMUSG00000020752 | 1,73E-01  | 4,903670523  | 5,42E+00 | 1,99E-02 | 1,51E-01 | Recql5   | 1,13 | No  |
| ENSMUSG00000020755 | 8,10E-02  | 4,77982482   | 1,12E+00 | 2,90E-01 | 5,85E-01 | Sap30bp  | 1,06 | No  |
| ENSMUSG00000020758 | -7,57E-01 | -0,997887306 | 3,04E+00 | 8,15E-02 | 3,66E-01 | Itgb4    | 0,59 | No  |
| ENSMUSG00000020766 | 2,40E-01  | 4,019822873  | 7,27E+00 | 7,00E-03 | 7,18E-02 | Galk1    | 1,18 | No  |
| ENSMUSG00000020770 | 6,71E-02  | 4,993686736  | 8,26E-01 | 3,63E-01 | 6,65E-01 | Unk      | 1,05 | No  |
| ENSMUSG00000020773 | 3,80E-01  | 4,016540906  | 1,79E+01 | 2,39E-05 | 7,23E-04 | Trim47   | 1,30 | Yes |
| ENSMUSG00000020774 | 1,84E+00  | -2,770627672 | 1,33E+00 | 2,49E-01 | 5,50E-01 | Aspa     | 3,58 | No  |
| ENSMUSG00000020775 | 1,24E-01  | 3,961098272  | 1,94E+00 | 1,64E-01 | 5,15E-01 | Mrpl38   | 1,09 | No  |
| ENSMUSG00000020776 | 3,47E-02  | 4,334148012  | 1,78E-01 | 6,73E-01 | 8,90E-01 | Fbf1     | 1,02 | No  |
| ENSMUSG00000020777 | 9,15E-02  | 6,864156868  | 2,23E+00 | 1,35E-01 | 4,63E-01 | Acox1    | 1,07 | No  |
| ENSMUSG00000020778 | 2,82E-01  | 4,662823055  | 1,28E+01 | 3,37E-04 | 6,66E-03 | Ten1     | 1,22 | Yes |
| ENSMUSG00000020780 | -2,70E-02 | 5,515710916  | 1,52E-01 | 6,97E-01 | 9,03E-01 | Srp68    | 0,98 | No  |
| ENSMUSG00000020781 | -5,81E-02 | 3,624013132  | 3,76E-01 | 5,40E-01 | 8,10E-01 | Tsen54   | 0,96 | No  |
| ENSMUSG00000020782 | 1,08E-01  | 3,430529566  | 1,14E+00 | 2,86E-01 | 5,82E-01 | Llgl2    | 1,08 | No  |
| ENSMUSG00000020783 | 7,44E-03  | 5,642390103  | 1,20E-02 | 9,13E-01 | 1,00E+00 | Ncbp3    | 1,01 | No  |
| ENSMUSG00000020785 | -1,02E+00 | -0,785521987 | 6,71E+00 | 9,59E-03 | 9,04E-02 | Camkk1   | 0,49 | No  |
| ENSMUSG00000020787 | -2,18E-01 | 0,432272158  | 7,11E-01 | 3,99E-01 | 6,98E-01 | P2rx1    | 0,86 | No  |
| ENSMUSG00000020788 | 6,15E-02  | 7,135694149  | 1,03E+00 | 3,10E-01 | 6,08E-01 | Atp2a3   | 1,04 | No  |
| ENSMUSG00000020790 | 8,98E-02  | 7,542844046  | 2,30E+00 | 1,29E-01 | 4,51E-01 | Ankfy1   | 1,06 | No  |
| ENSMUSG00000020792 | 3,16E-02  | 4,945120207  | 1,80E-01 | 6,71E-01 | 8,89E-01 | Exoc7    | 1,02 | No  |
| ENSMUSG00000020793 | 6,22E-01  | -0,998209429 | 1,71E+00 | 1,91E-01 | 5,50E-01 | Galr2    | 1,54 | No  |
| ENSMUSG00000020794 | 1,09E-02  | 5,451360206  | 2,46E-02 | 8,75E-01 | 1,00E+00 | Ube2g1   | 1,01 | No  |
| ENSMUSG00000020798 | -3,59E-01 | 1,99410835   | 5,91E+00 | 1,51E-02 | 1,26E-01 | Spns3    | 0,78 | No  |

|                    |           |              |           |          |          |               |      |     |
|--------------------|-----------|--------------|-----------|----------|----------|---------------|------|-----|
| ENSMUSG00000020801 | 1,49E-01  | 2,205365748  | 1,09E+00  | 2,97E-01 | 5,92E-01 | Med31         | 1,11 | No  |
| ENSMUSG00000020802 | 4,47E-02  | 4,689830076  | 3,28E-01  | 5,67E-01 | 8,29E-01 | Ube2o         | 1,03 | No  |
| ENSMUSG00000020803 | -1,82E-01 | 6,466138185  | 8,40E+00  | 3,76E-03 | 4,52E-02 | Txndc17       | 0,88 | Yes |
| ENSMUSG00000020804 | -1,87E+00 | -2,185550852 | 4,11E+00  | 4,27E-02 | 2,46E-01 | Aanat         | 0,27 | No  |
| ENSMUSG00000020806 | 9,17E-02  | 6,31017699   | 2,07E+00  | 1,50E-01 | 4,91E-01 | Rhbdf2        | 1,07 | No  |
| ENSMUSG00000020807 | 7,35E-02  | 3,745627709  | 6,27E-01  | 4,28E-01 | 7,22E-01 | 4933427D14Rik | 1,05 | No  |
| ENSMUSG00000020808 | 1,13E-01  | 4,090467437  | 1,69E+00  | 1,94E-01 | 5,50E-01 | Pimreg        | 1,08 | No  |
| ENSMUSG00000020810 | 5,11E-01  | -1,006779088 | 1,11E+00  | 2,93E-01 | 5,88E-01 | Cygb          | 1,43 | No  |
| ENSMUSG00000020812 | -2,95E-01 | 3,050203714  | 7,00E+00  | 8,16E-03 | 8,02E-02 | 1810032O08Rik | 0,82 | No  |
| ENSMUSG00000020814 | -3,55E-01 | -1,126575625 | 6,15E-01  | 4,33E-01 | 7,26E-01 | Mxra7         | 0,78 | No  |
| ENSMUSG00000020817 | 1,71E-02  | 6,466118074  | 7,38E-02  | 7,86E-01 | 9,52E-01 | Rabep1        | 1,01 | No  |
| ENSMUSG00000020818 | 2,19E-01  | 6,326096662  | 1,18E+01  | 5,82E-04 | 1,04E-02 | Mfsd11        | 1,16 | Yes |
| ENSMUSG00000020821 | -7,34E-03 | 7,682233923  | 1,56E-02  | 9,01E-01 | 1,00E+00 | Kif1c         | 0,99 | No  |
| ENSMUSG00000020823 | 1,12E-01  | 6,281571336  | 3,10E+00  | 7,84E-02 | 3,58E-01 | Sec14l1       | 1,08 | No  |
| ENSMUSG00000020826 | 5,91E-02  | 0,939980905  | 8,03E-02  | 7,77E-01 | 9,46E-01 | Nos2          | 1,04 | No  |
| ENSMUSG00000020827 | -1,92E-01 | 7,769313638  | 1,08E+01  | 1,02E-03 | 1,64E-02 | Mink1         | 0,88 | Yes |
| ENSMUSG00000020828 | -1,42E-02 | 5,802777209  | 4,58E-02  | 8,30E-01 | 9,77E-01 | Pld2          | 0,99 | No  |
| ENSMUSG00000020829 | 2,16E-01  | 1,240156169  | 1,22E+00  | 2,70E-01 | 5,66E-01 | Slc46a1       | 1,16 | No  |
| ENSMUSG00000020830 | -4,86E-02 | -2,896158361 | 1,09E-03  | 9,74E-01 | 1,00E+00 | Vmo1          | 0,97 | No  |
| ENSMUSG00000020831 | -6,28E-02 | 3,322932681  | 3,61E-01  | 5,48E-01 | 8,15E-01 | 0610010K14Rik | 0,96 | No  |
| ENSMUSG00000020832 | 9,79E-03  | 4,060526936  | 1,22E-02  | 9,12E-01 | 1,00E+00 | Eral1         | 1,01 | No  |
| ENSMUSG00000020834 | 1,63E-01  | 2,625467581  | 1,69E+00  | 1,94E-01 | 5,50E-01 | Dhrs13        | 1,12 | No  |
| ENSMUSG00000020836 | -1,17E-01 | 2,119929303  | 6,33E-01  | 4,26E-01 | 7,21E-01 | Coro6         | 0,92 | No  |
| ENSMUSG00000020838 | 7,61E-01  | 5,11987344   | 1,04E+02  | 1,88E-24 | 6,42E-22 | Slc6a4        | 1,69 | Yes |
| ENSMUSG00000020839 | -1,89E+00 | -3,1076441   | 1,42E+00  | 2,33E-01 | 5,50E-01 | Tmigd1        | 0,27 | No  |
| ENSMUSG00000020840 | 8,96E-03  | 5,302680596  | 1,59E-02  | 9,00E-01 | 1,00E+00 | Blmh          | 1,01 | No  |
| ENSMUSG00000020841 | 1,50E-01  | 7,863421261  | 6,57E+00  | 1,04E-02 | 9,58E-02 | Cpd           | 1,11 | No  |
| ENSMUSG00000020843 | 8,62E-02  | 4,579415128  | 1,18E+00  | 2,77E-01 | 5,74E-01 | Timm22        | 1,06 | No  |
| ENSMUSG00000020844 | 1,31E-01  | 3,627351077  | 1,84E+00  | 1,75E-01 | 5,34E-01 | Nxn           | 1,09 | No  |
| ENSMUSG00000020846 | -2,48E-02 | 2,897812957  | 4,49E-02  | 8,32E-01 | 9,78E-01 | Rflnb         | 0,98 | No  |
| ENSMUSG00000020847 | -9,78E-01 | -1,683060196 | 3,00E+00  | 8,33E-02 | 3,71E-01 | Rph3al        | 0,51 | No  |
| ENSMUSG00000020848 | 3,14E-02  | -3,107617333 | -7,69E-10 | 1,00E+00 | 1,00E+00 | Doc2b         | 1,02 | No  |

|                    |           |              |          |          |          |               |      |     |
|--------------------|-----------|--------------|----------|----------|----------|---------------|------|-----|
| ENSMUSG00000020849 | 2,36E-02  | 8,488081826  | 1,68E-01 | 6,82E-01 | 8,94E-01 | Ywhae         | 1,02 | No  |
| ENSMUSG00000020850 | 5,68E-02  | 8,632379032  | 9,83E-01 | 3,22E-01 | 6,22E-01 | Prpf8         | 1,04 | No  |
| ENSMUSG00000020857 | -1,62E-02 | 5,108876228  | 4,94E-02 | 8,24E-01 | 9,73E-01 | Nme2          | 0,99 | No  |
| ENSMUSG00000020859 | -9,70E-02 | 8,11314734   | 2,80E+00 | 9,43E-02 | 3,84E-01 | Spag9         | 0,94 | No  |
| ENSMUSG00000020863 | -3,32E-02 | 5,956070968  | 2,57E-01 | 6,12E-01 | 8,52E-01 | Luc7l3        | 0,98 | No  |
| ENSMUSG00000020864 | -5,36E-02 | 6,11207619   | 6,83E-01 | 4,09E-01 | 7,05E-01 | Ankrd40       | 0,96 | No  |
| ENSMUSG00000020865 | -1,91E-02 | 3,771838812  | 4,08E-02 | 8,40E-01 | 9,83E-01 | Abcc3         | 0,99 | No  |
| ENSMUSG00000020866 | -8,41E-01 | -2,89611984  | 3,88E-01 | 5,33E-01 | 8,06E-01 | Cacna1g       | 0,56 | No  |
| ENSMUSG00000020868 | 1,15E-01  | 5,251993863  | 2,57E+00 | 1,09E-01 | 4,05E-01 | Xylt2         | 1,08 | No  |
| ENSMUSG00000020869 | 5,72E-02  | 7,75123985   | 9,48E-01 | 3,30E-01 | 6,31E-01 | Lrrc59        | 1,04 | No  |
| ENSMUSG00000020870 | -1,16E-01 | 4,728826711  | 2,25E+00 | 1,34E-01 | 4,60E-01 | Cdc34b        | 0,92 | No  |
| ENSMUSG00000020871 | -8,42E-01 | -2,896108869 | 3,88E-01 | 5,33E-01 | 8,06E-01 | Dlx4          | 0,56 | No  |
| ENSMUSG00000020872 | -1,97E+00 | -1,89607874  | 8,28E+00 | 4,01E-03 | 4,74E-02 | Tac4          | 0,25 | Yes |
| ENSMUSG00000020873 | 1,16E-01  | 5,890883795  | 3,04E+00 | 8,13E-02 | 3,66E-01 | Slc35b1       | 1,08 | No  |
| ENSMUSG00000020876 | 3,18E-02  | 5,436932635  | 2,10E-01 | 6,46E-01 | 8,74E-01 | Snx11         | 1,02 | No  |
| ENSMUSG00000020877 | 8,36E-05  | 1,65300073   | 2,60E-07 | 1,00E+00 | 1,00E+00 | Scrn2         | 1,00 | No  |
| ENSMUSG00000020878 | -6,92E-01 | -1,863656664 | 1,09E+00 | 2,96E-01 | 5,91E-01 | Lrrc46        | 0,62 | No  |
| ENSMUSG00000020882 | -1,76E-01 | 3,693717037  | 3,53E+00 | 6,02E-02 | 3,04E-01 | Cacnb1        | 0,89 | No  |
| ENSMUSG00000020883 | -1,06E-01 | 6,73619568   | 2,96E+00 | 8,51E-02 | 3,75E-01 | Fbxl20        | 0,93 | No  |
| ENSMUSG00000020884 | -1,42E+00 | -2,896085476 | 1,27E+00 | 2,60E-01 | 5,53E-01 | Asgr1         | 0,37 | No  |
| ENSMUSG00000020886 | -4,43E-02 | 2,081357184  | 8,84E-02 | 7,66E-01 | 9,40E-01 | Dlg4          | 0,97 | No  |
| ENSMUSG00000020887 | 6,05E-01  | -2,863749462 | 1,46E-01 | 7,03E-01 | 9,06E-01 | A230052G05Rik | 1,52 | No  |
| ENSMUSG00000020888 | 9,89E-02  | 4,764472048  | 1,66E+00 | 1,97E-01 | 5,50E-01 | Dvl2          | 1,07 | No  |
| ENSMUSG00000020889 | 1,04E-01  | 2,048781559  | 4,72E-01 | 4,92E-01 | 7,78E-01 | Nr1d1         | 1,07 | No  |
| ENSMUSG00000020890 | -4,51E-01 | -2,033646651 | 3,75E-01 | 5,40E-01 | 8,10E-01 | Gucy2e        | 0,73 | No  |
| ENSMUSG00000020891 | -1,27E+00 | -2,355604143 | 1,55E+00 | 2,14E-01 | 5,50E-01 | Alox8         | 0,41 | No  |
| ENSMUSG00000020892 | 3,07E-01  | -0,522810237 | 7,72E-01 | 3,79E-01 | 6,80E-01 | Aloxe3        | 1,24 | No  |
| ENSMUSG00000020893 | -3,66E-02 | 6,221609127  | 3,20E-01 | 5,71E-01 | 8,32E-01 | Per1          | 0,97 | No  |
| ENSMUSG00000020894 | -1,23E-01 | 5,677929502  | 3,33E+00 | 6,81E-02 | 3,28E-01 | Vamp2         | 0,92 | No  |
| ENSMUSG00000020895 | -1,08E-01 | 1,74776437   | 4,50E-01 | 5,02E-01 | 7,87E-01 | Tmem107       | 0,93 | No  |
| ENSMUSG00000020897 | 2,43E-01  | 5,410910914  | 1,20E+01 | 5,29E-04 | 9,59E-03 | Aurkb         | 1,18 | Yes |
| ENSMUSG00000020898 | -1,28E-02 | 5,272859043  | 3,23E-02 | 8,57E-01 | 9,94E-01 | Ctc1          | 0,99 | No  |

|                    |           |              |          |          |          |               |      |     |
|--------------------|-----------|--------------|----------|----------|----------|---------------|------|-----|
| ENSMUSG00000020899 | 2,24E-01  | 4,972913569  | 9,12E+00 | 2,52E-03 | 3,36E-02 | Pfas          | 1,17 | Yes |
| ENSMUSG00000020900 | -2,03E-01 | 3,662188942  | 4,47E+00 | 3,45E-02 | 2,19E-01 | Myh10         | 0,87 | No  |
| ENSMUSG00000020901 | -2,82E-01 | 8,111241881  | 2,37E+01 | 1,13E-06 | 4,93E-05 | Pik3r5        | 0,82 | Yes |
| ENSMUSG00000020902 | -1,56E+00 | -1,963136046 | 4,52E+00 | 3,34E-02 | 2,14E-01 | Ntn1          | 0,34 | No  |
| ENSMUSG00000020903 | -8,68E-02 | 4,401063515  | 1,13E+00 | 2,88E-01 | 5,83E-01 | Stx8          | 0,94 | No  |
| ENSMUSG00000020904 | -5,32E-01 | -2,83201529  | 2,19E-01 | 6,40E-01 | 8,70E-01 | Cfap52        | 0,69 | No  |
| ENSMUSG00000020905 | 1,83E-01  | -2,683145648 | 2,84E-02 | 8,66E-01 | 9,99E-01 | Usp43         | 1,14 | No  |
| ENSMUSG00000020907 | 2,07E+00  | -2,226374873 | 5,44E+00 | 1,97E-02 | 1,50E-01 | Rcvrn         | 4,19 | No  |
| ENSMUSG00000020908 | -2,66E-01 | -2,145931622 | 1,23E-01 | 7,26E-01 | 9,18E-01 | Myh3          | 0,83 | No  |
| ENSMUSG00000020910 | -1,17E-01 | 3,544299627  | 1,44E+00 | 2,31E-01 | 5,50E-01 | Adprm         | 0,92 | No  |
| ENSMUSG00000020911 | 1,85E+00  | -3,107657832 | 1,35E+00 | 2,46E-01 | 5,50E-01 | Krt19         | 3,61 | No  |
| ENSMUSG00000020914 | 2,09E-01  | 8,003458337  | 1,29E+01 | 3,37E-04 | 6,66E-03 | Top2a         | 1,16 | Yes |
| ENSMUSG00000020917 | 1,29E-01  | 8,48267692   | 5,02E+00 | 2,50E-02 | 1,75E-01 | Acly          | 1,09 | No  |
| ENSMUSG00000020918 | 1,52E-01  | 4,859294691  | 4,02E+00 | 4,49E-02 | 2,53E-01 | Kat2a         | 1,11 | No  |
| ENSMUSG00000020919 | -7,69E-02 | 6,602038395  | 1,54E+00 | 2,15E-01 | 5,50E-01 | Stat5b        | 0,95 | No  |
| ENSMUSG00000020921 | -5,90E-02 | 3,797960517  | 4,03E-01 | 5,26E-01 | 8,03E-01 | Tmem101       | 0,96 | No  |
| ENSMUSG00000020922 | 1,08E-01  | 5,083819127  | 2,17E+00 | 1,41E-01 | 4,74E-01 | Lsm12         | 1,08 | No  |
| ENSMUSG00000020923 | 8,70E-02  | 6,774282523  | 2,00E+00 | 1,57E-01 | 5,03E-01 | Ubtf          | 1,06 | No  |
| ENSMUSG00000020925 | 8,52E-02  | 4,65295852   | 1,18E+00 | 2,77E-01 | 5,74E-01 | Ccdc43        | 1,06 | No  |
| ENSMUSG00000020926 | -8,55E-01 | 5,415498341  | 1,51E+02 | 1,31E-34 | 1,06E-31 | Adam11        | 0,55 | Yes |
| ENSMUSG00000020928 | -1,86E+00 | -3,033612668 | 1,39E+00 | 2,38E-01 | 5,50E-01 | Higd1b        | 0,28 | No  |
| ENSMUSG00000020929 | 9,09E-02  | 6,114526987  | 1,97E+00 | 1,61E-01 | 5,09E-01 | Eftud2        | 1,07 | No  |
| ENSMUSG00000020930 | 1,87E+00  | -3,107639691 | 1,38E+00 | 2,40E-01 | 5,50E-01 | Ccdc103       | 3,67 | No  |
| ENSMUSG00000020932 | -7,37E-02 | -1,37832256  | 2,03E-02 | 8,87E-01 | 1,00E+00 | Gfap          | 0,95 | No  |
| ENSMUSG00000020935 | 1,68E-01  | 4,002546075  | 3,62E+00 | 5,72E-02 | 2,94E-01 | Dcakd         | 1,12 | No  |
| ENSMUSG00000020936 | -2,93E-02 | 6,90028344   | 2,30E-01 | 6,31E-01 | 8,64E-01 | Nmt1          | 0,98 | No  |
| ENSMUSG00000020937 | 2,22E-01  | -0,831916736 | 2,93E-01 | 5,88E-01 | 8,40E-01 | Plcd3         | 1,17 | No  |
| ENSMUSG00000020940 | -9,31E-01 | -1,654960623 | 2,14E+00 | 1,44E-01 | 4,79E-01 | 1700023F06Rik | 0,52 | No  |
| ENSMUSG00000020941 | -4,14E-01 | 7,135754843  | 4,75E+01 | 5,59E-12 | 6,25E-10 | Map3k14       | 0,75 | Yes |
| ENSMUSG00000020946 | -6,50E-02 | 7,02701389   | 1,15E+00 | 2,83E-01 | 5,79E-01 | Gosr2         | 0,96 | No  |
| ENSMUSG00000020948 | -3,01E-03 | 4,754552439  | 1,58E-03 | 9,68E-01 | 1,00E+00 | Klhl28        | 1,00 | No  |
| ENSMUSG00000020949 | 6,11E-03  | 4,209310854  | 5,18E-03 | 9,43E-01 | 1,00E+00 | Fkbp3         | 1,00 | No  |



|                    |           |              |          |          |          |               |      |     |
|--------------------|-----------|--------------|----------|----------|----------|---------------|------|-----|
| ENSMUSG00000020952 | 2,40E-02  | 3,449346017  | 5,66E-02 | 8,12E-01 | 9,67E-01 | Scfd1         | 1,02 | No  |
| ENSMUSG00000020953 | -1,78E+00 | -0,78534219  | 2,24E+01 | 2,26E-06 | 9,02E-05 | Coch          | 0,29 | Yes |
| ENSMUSG00000020954 | 5,62E-02  | 5,225147548  | 6,14E-01 | 4,33E-01 | 7,27E-01 | Strn3         | 1,04 | No  |
| ENSMUSG00000020955 | -1,12E-01 | 3,794241656  | 1,47E+00 | 2,26E-01 | 5,50E-01 | Ap4s1         | 0,93 | No  |
| ENSMUSG00000020956 | 9,67E-02  | 3,201773239  | 8,23E-01 | 3,64E-01 | 6,65E-01 | Dtd2          | 1,07 | No  |
| ENSMUSG00000020961 | -1,54E-01 | 5,097368839  | 4,44E+00 | 3,51E-02 | 2,22E-01 | Ston2         | 0,90 | No  |
| ENSMUSG00000020962 | 1,27E-01  | 5,4174378    | 3,35E+00 | 6,73E-02 | 3,26E-01 | Gtf2a1        | 1,09 | No  |
| ENSMUSG00000020963 | -5,87E-01 | -2,832045155 | 2,71E-01 | 6,03E-01 | 8,48E-01 | Tshr          | 0,67 | No  |
| ENSMUSG00000020964 | 2,14E-02  | 7,99878818   | 1,36E-01 | 7,13E-01 | 9,11E-01 | Sel1l         | 1,01 | No  |
| ENSMUSG00000020973 | 1,95E-01  | 2,798799986  | 2,74E+00 | 9,78E-02 | 3,90E-01 | Dnaaf2        | 1,15 | No  |
| ENSMUSG00000020974 | 1,17E-01  | 1,966133509  | 5,93E-01 | 4,41E-01 | 7,33E-01 | Pole2         | 1,08 | No  |
| ENSMUSG00000020978 | 2,56E-02  | 4,098318874  | 8,45E-02 | 7,71E-01 | 9,43E-01 | Klhdc2        | 1,02 | No  |
| ENSMUSG00000020982 | -3,04E-02 | 5,773434946  | 2,06E-01 | 6,50E-01 | 8,76E-01 | Nemf          | 0,98 | No  |
| ENSMUSG00000020986 | 1,16E-01  | 4,539738782  | 2,13E+00 | 1,45E-01 | 4,81E-01 | Sec23a        | 1,08 | No  |
| ENSMUSG00000020988 | 6,83E-02  | 2,1524019    | 2,30E-01 | 6,32E-01 | 8,64E-01 | L2hgdh        | 1,05 | No  |
| ENSMUSG00000020990 | 1,15E+00  | -3,070184988 | 6,40E-01 | 4,24E-01 | 7,18E-01 | Cdkl1         | 2,22 | No  |
| ENSMUSG00000020992 | 7,54E-02  | -0,614101319 | 4,46E-02 | 8,33E-01 | 9,78E-01 | 4930512B01Rik | 1,05 | No  |
| ENSMUSG00000020993 | -9,85E-02 | 4,765568558  | 1,65E+00 | 2,00E-01 | 5,50E-01 | Trappc6b      | 0,93 | No  |
| ENSMUSG00000020994 | -6,05E-02 | 6,345864955  | 9,07E-01 | 3,41E-01 | 6,42E-01 | Pnn           | 0,96 | No  |
| ENSMUSG00000021000 | 1,10E-01  | 6,474884732  | 3,07E+00 | 7,98E-02 | 3,61E-01 | Ctage5        | 1,08 | No  |
| ENSMUSG00000021003 | -2,96E-02 | 5,052933376  | 1,62E-01 | 6,87E-01 | 8,98E-01 | Galc          | 0,98 | No  |
| ENSMUSG00000021007 | 3,53E-01  | 0,794079694  | 2,37E+00 | 1,23E-01 | 4,39E-01 | Spata7        | 1,28 | No  |
| ENSMUSG00000021009 | 3,05E-01  | 3,073208548  | 7,60E+00 | 5,83E-03 | 6,27E-02 | Ptpn21        | 1,24 | No  |
| ENSMUSG00000021010 | 1,81E+00  | -3,10765737  | 1,28E+00 | 2,58E-01 | 5,50E-01 | Npas3         | 3,49 | No  |
| ENSMUSG00000021012 | -1,08E-02 | 5,616485063  | 2,52E-02 | 8,74E-01 | 1,00E+00 | Zc3h14        | 0,99 | No  |
| ENSMUSG00000021013 | 3,03E-01  | 1,41555871   | 2,90E+00 | 8,83E-02 | 3,79E-01 | Ttc8          | 1,23 | No  |
| ENSMUSG00000021018 | 6,50E-02  | 2,815542154  | 3,06E-01 | 5,80E-01 | 8,37E-01 | Polr2h        | 1,05 | No  |
| ENSMUSG00000021022 | -5,80E-02 | 4,877410626  | 5,94E-01 | 4,41E-01 | 7,33E-01 | Ppp2r3c       | 0,96 | No  |
| ENSMUSG00000021023 | 1,13E-01  | 3,44266407   | 1,24E+00 | 2,65E-01 | 5,61E-01 | 1110008L16Rik | 1,08 | No  |
| ENSMUSG00000021024 | -1,62E-01 | 6,609194753  | 6,79E+00 | 9,17E-03 | 8,76E-02 | Psm6          | 0,89 | No  |
| ENSMUSG00000021025 | -4,39E-01 | 7,408991063  | 5,43E+01 | 1,69E-13 | 2,27E-11 | Nfkb1a        | 0,74 | Yes |
| ENSMUSG00000021027 | -6,64E-02 | 6,450639488  | 1,11E+00 | 2,91E-01 | 5,87E-01 | Ralgapa1      | 0,96 | No  |

|                    |           |              |          |          |          |           |      |     |
|--------------------|-----------|--------------|----------|----------|----------|-----------|------|-----|
| ENSMUSG00000021028 | -8,40E-02 | 3,845517045  | 8,27E-01 | 3,63E-01 | 6,64E-01 | Mbip      | 0,94 | No  |
| ENSMUSG00000021032 | 8,66E-01  | -2,226246734 | 1,15E+00 | 2,83E-01 | 5,79E-01 | Ngb       | 1,82 | No  |
| ENSMUSG00000021033 | 8,89E-02  | 3,447855872  | 7,83E-01 | 3,76E-01 | 6,77E-01 | Gstz1     | 1,06 | No  |
| ENSMUSG00000021036 | 4,44E-02  | 6,781509927  | 5,21E-01 | 4,70E-01 | 7,59E-01 | Sptlc2    | 1,03 | No  |
| ENSMUSG00000021037 | 8,52E-02  | 5,850948543  | 1,64E+00 | 2,00E-01 | 5,50E-01 | Ahsa1     | 1,06 | No  |
| ENSMUSG00000021038 | 1,37E-01  | 5,135502278  | 3,55E+00 | 5,96E-02 | 3,02E-01 | Vipas39   | 1,10 | No  |
| ENSMUSG00000021039 | -5,82E-04 | 5,470840594  | 7,06E-05 | 9,93E-01 | 1,00E+00 | Snw1      | 1,00 | No  |
| ENSMUSG00000021040 | -6,52E-02 | 4,39179493   | 6,42E-01 | 4,23E-01 | 7,18E-01 | Slirp     | 0,96 | No  |
| ENSMUSG00000021044 | -8,24E-03 | 3,666527849  | 7,44E-03 | 9,31E-01 | 1,00E+00 | Adck1     | 0,99 | No  |
| ENSMUSG00000021047 | 7,07E-01  | -2,963242697 | 2,70E-01 | 6,03E-01 | 8,48E-01 | Nova1     | 1,63 | No  |
| ENSMUSG00000021048 | 2,28E-01  | 5,017451849  | 9,50E+00 | 2,05E-03 | 2,86E-02 | Mthfd1    | 1,17 | Yes |
| ENSMUSG00000021051 | -4,19E-02 | 6,0922167    | 4,19E-01 | 5,17E-01 | 7,98E-01 | Ppp2r5e   | 0,97 | No  |
| ENSMUSG00000021054 | 2,51E-01  | 6,443825333  | 1,59E+01 | 6,85E-05 | 1,76E-03 | Sgpp1     | 1,19 | Yes |
| ENSMUSG00000021055 | 3,15E+00  | -2,896141349 | 4,06E+00 | 4,39E-02 | 2,50E-01 | Esr2      | 8,91 | No  |
| ENSMUSG00000021057 | -6,18E-01 | 2,41483041   | 2,29E+01 | 1,74E-06 | 7,18E-05 | Akap5     | 0,65 | Yes |
| ENSMUSG00000021061 | -7,70E-02 | 2,044218073  | 2,63E-01 | 6,08E-01 | 8,51E-01 | Sptb      | 0,95 | No  |
| ENSMUSG00000021062 | 3,21E-01  | 2,419032089  | 5,62E+00 | 1,77E-02 | 1,39E-01 | Rab15     | 1,25 | No  |
| ENSMUSG00000021065 | -1,31E-01 | 4,467321696  | 2,65E+00 | 1,03E-01 | 3,95E-01 | Fut8      | 0,91 | No  |
| ENSMUSG00000021066 | 8,24E-02  | 5,316084315  | 1,35E+00 | 2,45E-01 | 5,50E-01 | Atl1      | 1,06 | No  |
| ENSMUSG00000021067 | 1,19E-01  | 7,159901022  | 3,87E+00 | 4,91E-02 | 2,67E-01 | Sav1      | 1,09 | No  |
| ENSMUSG00000021068 | 2,96E-02  | 7,476681141  | 2,49E-01 | 6,18E-01 | 8,55E-01 | Nin       | 1,02 | No  |
| ENSMUSG00000021069 | 1,26E-01  | 7,521765383  | 4,50E+00 | 3,39E-02 | 2,17E-01 | Pygl      | 1,09 | No  |
| ENSMUSG00000021070 | -8,16E-01 | -0,641359214 | 4,59E+00 | 3,21E-02 | 2,08E-01 | Bdkrb2    | 0,57 | No  |
| ENSMUSG00000021071 | -7,95E-02 | -2,333214728 | 7,22E-03 | 9,32E-01 | 1,00E+00 | Trim9     | 0,95 | No  |
| ENSMUSG00000021072 | 6,00E-02  | 6,323547698  | 8,88E-01 | 3,46E-01 | 6,47E-01 | Tmx1      | 1,04 | No  |
| ENSMUSG00000021076 | -4,36E-02 | 4,815369266  | 3,23E-01 | 5,70E-01 | 8,31E-01 | Actr10    | 0,97 | No  |
| ENSMUSG00000021078 | -1,71E-01 | -2,126718075 | 5,25E-02 | 8,19E-01 | 9,71E-01 | Tomm20l   | 0,89 | No  |
| ENSMUSG00000021079 | 1,49E-01  | 3,327447031  | 2,06E+00 | 1,52E-01 | 4,94E-01 | Timm9     | 1,11 | No  |
| ENSMUSG00000021086 | 1,30E-01  | 0,111762881  | 2,11E-01 | 6,46E-01 | 8,74E-01 | Ccdc175   | 1,09 | No  |
| ENSMUSG00000021087 | 3,11E-02  | 4,309821386  | 1,39E-01 | 7,09E-01 | 9,09E-01 | Rtn1      | 1,02 | No  |
| ENSMUSG00000021090 | -2,69E+00 | -2,963260181 | 2,87E+00 | 9,01E-02 | 3,80E-01 | Lrrc9     | 0,16 | No  |
| ENSMUSG00000021091 | 7,56E-01  | -2,963268003 | 3,13E-01 | 5,76E-01 | 8,34E-01 | Serpina3n | 1,69 | No  |

|                    |           |              |           |          |          |               |      |     |
|--------------------|-----------|--------------|-----------|----------|----------|---------------|------|-----|
| ENSMUSG00000021094 | -5,22E-02 | 4,742733612  | 4,51E-01  | 5,02E-01 | 7,87E-01 | Dhrs7         | 0,96 | No  |
| ENSMUSG00000021095 | 1,47E+00  | -1,033774163 | 1,10E+01  | 9,24E-04 | 1,51E-02 | Gsc           | 2,77 | Yes |
| ENSMUSG00000021096 | -1,16E-02 | 6,404727192  | 3,38E-02  | 8,54E-01 | 9,92E-01 | Ppm1a         | 0,99 | No  |
| ENSMUSG00000021097 | -9,69E-02 | 3,177665834  | 8,12E-01  | 3,67E-01 | 6,69E-01 | Clmn          | 0,94 | No  |
| ENSMUSG00000021098 | 1,27E+00  | -2,863717917 | 1,00E+00  | 3,16E-01 | 6,17E-01 | 4930447C04Rik | 2,41 | No  |
| ENSMUSG00000021099 | 2,06E-02  | -3,146103739 | -9,26E-10 | 1,00E+00 | 1,00E+00 | Six6          | 1,01 | No  |
| ENSMUSG00000021101 | 3,23E-01  | -2,711770618 | 1,06E-01  | 7,44E-01 | 9,29E-01 | 4930408O17Rik | 1,25 | No  |
| ENSMUSG00000021102 | 1,02E-01  | 5,308399787  | 2,05E+00  | 1,52E-01 | 4,94E-01 | Glrx5         | 1,07 | No  |
| ENSMUSG00000021103 | -7,60E-02 | 3,954274145  | 7,12E-01  | 3,99E-01 | 6,98E-01 | Mnat1         | 0,95 | No  |
| ENSMUSG00000021108 | 2,35E-01  | 4,220014677  | 7,47E+00  | 6,29E-03 | 6,65E-02 | Prkch         | 1,18 | No  |
| ENSMUSG00000021109 | -7,59E-02 | 7,728231908  | 1,66E+00  | 1,97E-01 | 5,50E-01 | Hif1a         | 0,95 | No  |
| ENSMUSG00000021111 | 1,40E-01  | 7,174734843  | 5,43E+00  | 1,98E-02 | 1,50E-01 | Papola        | 1,10 | No  |
| ENSMUSG00000021112 | -2,43E-03 | 4,613121782  | 9,72E-04  | 9,75E-01 | 1,00E+00 | Mpp5          | 1,00 | No  |
| ENSMUSG00000021113 | -1,66E-02 | 4,019990188  | 3,54E-02  | 8,51E-01 | 9,90E-01 | Snapc1        | 0,99 | No  |
| ENSMUSG00000021114 | -1,52E-02 | 6,028785505  | 5,39E-02  | 8,16E-01 | 9,69E-01 | Atp6v1d       | 0,99 | No  |
| ENSMUSG00000021115 | -2,61E-03 | 6,834949906  | 1,81E-03  | 9,66E-01 | 1,00E+00 | Vrk1          | 1,00 | No  |
| ENSMUSG00000021116 | -4,94E-02 | 5,827221104  | 5,51E-01  | 4,58E-01 | 7,47E-01 | Eif2s1        | 0,97 | No  |
| ENSMUSG00000021118 | -1,21E+00 | 2,53551166   | 9,39E+01  | 3,26E-22 | 9,23E-20 | Plek2         | 0,43 | Yes |
| ENSMUSG00000021120 | -6,57E-03 | 2,655025643  | 2,91E-03  | 9,57E-01 | 1,00E+00 | Pigh          | 1,00 | No  |
| ENSMUSG00000021123 | -1,01E+00 | -0,116906546 | 1,14E+01  | 7,52E-04 | 1,28E-02 | Rdh12         | 0,50 | Yes |
| ENSMUSG00000021124 | 8,36E-02  | 5,901835256  | 1,60E+00  | 2,06E-01 | 5,50E-01 | Vti1b         | 1,06 | No  |
| ENSMUSG00000021125 | 1,71E-02  | 1,620223339  | 9,97E-03  | 9,20E-01 | 1,00E+00 | Arg2          | 1,01 | No  |
| ENSMUSG00000021127 | -2,14E-01 | 7,73909873   | 1,33E+01  | 2,66E-04 | 5,50E-03 | Zfp361l       | 0,86 | Yes |
| ENSMUSG00000021130 | -1,92E+00 | -3,0336536   | 1,46E+00  | 2,27E-01 | 5,50E-01 | Galnt16       | 0,26 | No  |
| ENSMUSG00000021131 | -5,81E-02 | 5,204289331  | 6,57E-01  | 4,18E-01 | 7,12E-01 | Erh           | 0,96 | No  |
| ENSMUSG00000021133 | 2,42E-02  | 7,372162394  | 1,65E-01  | 6,85E-01 | 8,96E-01 | Susd6         | 1,02 | No  |
| ENSMUSG00000021134 | 3,45E-02  | 7,243407976  | 3,32E-01  | 5,65E-01 | 8,27E-01 | Srsf5         | 1,02 | No  |
| ENSMUSG00000021135 | 1,08E+00  | -1,574218343 | 3,18E+00  | 7,47E-02 | 3,47E-01 | Slc10a1       | 2,12 | No  |
| ENSMUSG00000021136 | 7,20E-01  | 0,704975643  | 8,16E+00  | 4,28E-03 | 4,97E-02 | Smoc1         | 1,65 | Yes |
| ENSMUSG00000021139 | 6,24E-02  | 2,879397884  | 2,86E-01  | 5,93E-01 | 8,42E-01 | Gm20498       | 1,04 | No  |
| ENSMUSG00000021140 | -8,32E-02 | 5,774855912  | 1,54E+00  | 2,14E-01 | 5,50E-01 | Pcnx          | 0,94 | No  |
| ENSMUSG00000021143 | 1,47E-01  | 7,446669383  | 6,10E+00  | 1,35E-02 | 1,17E-01 | Pacs2         | 1,11 | No  |

|                    |           |              |          |          |          |               |      |     |
|--------------------|-----------|--------------|----------|----------|----------|---------------|------|-----|
| ENSMUSG00000021144 | -1,08E-02 | 5,278140929  | 2,31E-02 | 8,79E-01 | 1,00E+00 | Mta1          | 0,99 | No  |
| ENSMUSG00000021147 | -5,52E-02 | 5,76505412   | 6,85E-01 | 4,08E-01 | 7,04E-01 | Wdr37         | 0,96 | No  |
| ENSMUSG00000021148 | -7,54E-01 | -1,831961184 | 1,49E+00 | 2,22E-01 | 5,50E-01 | Gm9745        | 0,59 | No  |
| ENSMUSG00000021149 | -2,73E-01 | 6,164535553  | 1,80E+01 | 2,24E-05 | 6,87E-04 | Gtpbp4        | 0,83 | Yes |
| ENSMUSG00000021156 | -8,09E-02 | 6,053326645  | 1,55E+00 | 2,14E-01 | 5,50E-01 | Zmynd11       | 0,95 | No  |
| ENSMUSG00000021171 | 8,83E-02  | 7,222656007  | 2,16E+00 | 1,41E-01 | 4,75E-01 | Esyt2         | 1,06 | No  |
| ENSMUSG00000021175 | 1,72E-01  | 3,955182797  | 3,63E+00 | 5,67E-02 | 2,93E-01 | Cdca7l        | 1,13 | No  |
| ENSMUSG00000021176 | -1,38E-01 | 1,661211909  | 6,70E-01 | 4,13E-01 | 7,09E-01 | Efcab11       | 0,91 | No  |
| ENSMUSG00000021177 | 4,82E-02  | 3,2088097    | 2,07E-01 | 6,49E-01 | 8,75E-01 | Tdp1          | 1,03 | No  |
| ENSMUSG00000021178 | -6,31E-02 | 5,548926573  | 8,38E-01 | 3,60E-01 | 6,61E-01 | Psmc1         | 0,96 | No  |
| ENSMUSG00000021179 | -1,32E-01 | 4,877550956  | 3,08E+00 | 7,93E-02 | 3,60E-01 | Nrde2         | 0,91 | No  |
| ENSMUSG00000021180 | -1,41E-01 | 4,541794577  | 3,12E+00 | 7,76E-02 | 3,56E-01 | Rps6ka5       | 0,91 | No  |
| ENSMUSG00000021182 | -2,40E-01 | 5,715397541  | 1,27E+01 | 3,66E-04 | 7,11E-03 | Ccdc88c       | 0,85 | Yes |
| ENSMUSG00000021185 | -1,72E-02 | 5,872388146  | 6,74E-02 | 7,95E-01 | 9,57E-01 | 9030617003Rik | 0,99 | No  |
| ENSMUSG00000021186 | -2,72E-01 | -1,600650127 | 2,60E-01 | 6,10E-01 | 8,51E-01 | Fbln5         | 0,83 | No  |
| ENSMUSG00000021187 | -4,64E-01 | -2,711695019 | 2,21E-01 | 6,39E-01 | 8,69E-01 | Tc2n          | 0,73 | No  |
| ENSMUSG00000021188 | 6,84E-02  | 6,333865078  | 1,16E+00 | 2,81E-01 | 5,78E-01 | Trip11        | 1,05 | No  |
| ENSMUSG00000021189 | 1,10E-01  | 6,050648382  | 2,84E+00 | 9,20E-02 | 3,82E-01 | Atxn3         | 1,08 | No  |
| ENSMUSG00000021190 | 1,07E-01  | 8,243438784  | 3,44E+00 | 6,36E-02 | 3,15E-01 | Lgmn          | 1,08 | No  |
| ENSMUSG00000021192 | 4,24E-03  | 5,720721025  | 3,96E-03 | 9,50E-01 | 1,00E+00 | Golga5        | 1,00 | No  |
| ENSMUSG00000021193 | 7,87E-02  | 5,344172015  | 1,25E+00 | 2,64E-01 | 5,58E-01 | Pitrm1        | 1,06 | No  |
| ENSMUSG00000021194 | 4,01E-01  | -2,831991084 | 1,24E-01 | 7,25E-01 | 9,18E-01 | Chga          | 1,32 | No  |
| ENSMUSG00000021196 | -6,92E-02 | 9,342100217  | 1,49E+00 | 2,23E-01 | 5,50E-01 | Pfkp          | 0,95 | No  |
| ENSMUSG00000021198 | -1,89E+00 | -3,033648118 | 1,42E+00 | 2,33E-01 | 5,50E-01 | Unc79         | 0,27 | No  |
| ENSMUSG00000021200 | -1,01E+00 | 5,214174736  | 1,97E+02 | 9,81E-45 | 1,63E-41 | Asb2          | 0,50 | Yes |
| ENSMUSG00000021203 | 6,17E-02  | 1,16399364   | 9,99E-02 | 7,52E-01 | 9,32E-01 | Otub2         | 1,04 | No  |
| ENSMUSG00000021207 | -1,36E+00 | -2,770613073 | 1,16E+00 | 2,81E-01 | 5,78E-01 | Akr1c21       | 0,39 | No  |
| ENSMUSG00000021208 | -1,87E+00 | -3,107637761 | 1,39E+00 | 2,38E-01 | 5,50E-01 | lfi27l2b      | 0,27 | No  |
| ENSMUSG00000021209 | -2,66E-01 | -2,268107485 | 1,23E-01 | 7,26E-01 | 9,19E-01 | Ppp4r4        | 0,83 | No  |
| ENSMUSG00000021211 | 9,22E-02  | 1,091409727  | 2,18E-01 | 6,41E-01 | 8,70E-01 | Akr1c12       | 1,07 | No  |
| ENSMUSG00000021213 | -2,92E-02 | 3,354578934  | 8,00E-02 | 7,77E-01 | 9,47E-01 | Akr1c13       | 0,98 | No  |
| ENSMUSG00000021214 | -4,54E-01 | -2,185585694 | 3,80E-01 | 5,38E-01 | 8,09E-01 | Akr1c18       | 0,73 | No  |

|                    |           |              |          |          |          |          |      |     |
|--------------------|-----------|--------------|----------|----------|----------|----------|------|-----|
| ENSMUSG00000021215 | -5,13E-01 | 6,776288212  | 6,98E+01 | 6,70E-17 | 1,20E-14 | Net1     | 0,70 | Yes |
| ENSMUSG00000021217 | -1,74E-01 | -0,816397956 | 1,84E-01 | 6,68E-01 | 8,87E-01 | Tshz3    | 0,89 | No  |
| ENSMUSG00000021218 | -1,79E-02 | 9,13323093   | 9,98E-02 | 7,52E-01 | 9,32E-01 | Gdi2     | 0,99 | No  |
| ENSMUSG00000021219 | 1,04E+00  | -2,800939709 | 6,29E-01 | 4,28E-01 | 7,21E-01 | Rgs6     | 2,05 | No  |
| ENSMUSG00000021221 | -4,49E-01 | 1,376026009  | 6,18E+00 | 1,30E-02 | 1,13E-01 | Dpf3     | 0,73 | No  |
| ENSMUSG00000021222 | -1,18E-01 | 3,538611732  | 1,45E+00 | 2,28E-01 | 5,50E-01 | Dcaf4    | 0,92 | No  |
| ENSMUSG00000021223 | 4,61E-01  | -1,600627629 | 5,85E-01 | 4,44E-01 | 7,36E-01 | Papln    | 1,38 | No  |
| ENSMUSG00000021224 | 9,21E-02  | 4,961645036  | 1,53E+00 | 2,17E-01 | 5,50E-01 | Numb     | 1,07 | No  |
| ENSMUSG00000021226 | -3,19E-01 | 3,8282163    | 1,22E+01 | 4,90E-04 | 9,03E-03 | Acot2    | 0,80 | Yes |
| ENSMUSG00000021228 | -2,14E+00 | -2,42481685  | 4,70E+00 | 3,02E-02 | 1,99E-01 | Acot3    | 0,23 | No  |
| ENSMUSG00000021234 | 9,51E-02  | -0,020196367 | 9,75E-02 | 7,55E-01 | 9,34E-01 | Fam161b  | 1,07 | No  |
| ENSMUSG00000021235 | -4,88E-02 | 3,343863204  | 2,17E-01 | 6,41E-01 | 8,71E-01 | Coq6     | 0,97 | No  |
| ENSMUSG00000021236 | 8,31E-02  | 4,616429022  | 1,10E+00 | 2,94E-01 | 5,89E-01 | Entpd5   | 1,06 | No  |
| ENSMUSG00000021238 | 1,60E-01  | 3,828173035  | 2,99E+00 | 8,35E-02 | 3,71E-01 | Aldh6a1  | 1,12 | No  |
| ENSMUSG00000021239 | 1,87E+00  | -3,107639691 | 1,38E+00 | 2,40E-01 | 5,50E-01 | Vsx2     | 3,67 | No  |
| ENSMUSG00000021240 | 2,29E-01  | 3,680694079  | 5,79E+00 | 1,61E-02 | 1,32E-01 | Abcd4    | 1,17 | No  |
| ENSMUSG00000021241 | -1,76E-02 | 4,33803597   | 4,49E-02 | 8,32E-01 | 9,78E-01 | Isca2    | 0,99 | No  |
| ENSMUSG00000021242 | 4,61E-02  | 9,213943802  | 6,61E-01 | 4,16E-01 | 7,11E-01 | Npc2     | 1,03 | No  |
| ENSMUSG00000021243 | -2,42E-01 | 2,26775851   | 2,94E+00 | 8,65E-02 | 3,78E-01 | Fcf1     | 0,85 | No  |
| ENSMUSG00000021244 | -3,52E-02 | 6,222386676  | 3,02E-01 | 5,83E-01 | 8,38E-01 | Ylpm1    | 0,98 | No  |
| ENSMUSG00000021245 | 1,01E-01  | 3,988060317  | 1,32E+00 | 2,50E-01 | 5,50E-01 | Mlh3     | 1,07 | No  |
| ENSMUSG00000021248 | 1,09E-01  | 7,599721567  | 3,39E+00 | 6,56E-02 | 3,21E-01 | Tmed10   | 1,08 | No  |
| ENSMUSG00000021250 | 7,80E-01  | 6,531780023  | 1,49E+02 | 3,00E-34 | 2,19E-31 | Fos      | 1,72 | Yes |
| ENSMUSG00000021252 | 1,00E-01  | 4,985977683  | 1,83E+00 | 1,76E-01 | 5,34E-01 | Erg28    | 1,07 | No  |
| ENSMUSG00000021253 | -8,58E-01 | 1,362754516  | 2,15E+01 | 3,54E-06 | 1,35E-04 | Tgfb3    | 0,55 | Yes |
| ENSMUSG00000021254 | -6,94E-03 | 5,560012743  | 1,03E-02 | 9,19E-01 | 1,00E+00 | Gpatch2l | 1,00 | No  |
| ENSMUSG00000021255 | 1,81E+00  | -3,10765737  | 1,28E+00 | 2,58E-01 | 5,50E-01 | Esrrb    | 3,49 | No  |
| ENSMUSG00000021256 | 2,68E-01  | 3,239456871  | 6,38E+00 | 1,15E-02 | 1,04E-01 | Vash1    | 1,20 | No  |
| ENSMUSG00000021257 | 2,36E-01  | 2,65995287   | 3,65E+00 | 5,61E-02 | 2,90E-01 | Angel1   | 1,18 | No  |
| ENSMUSG00000021258 | -2,14E-02 | 5,467292856  | 9,55E-02 | 7,57E-01 | 9,35E-01 | Ccnk     | 0,99 | No  |
| ENSMUSG00000021259 | 3,16E+00  | -2,963281728 | 4,07E+00 | 4,36E-02 | 2,49E-01 | Cyp46a1  | 8,92 | No  |
| ENSMUSG00000021260 | -5,17E-02 | -2,497606716 | 3,05E-03 | 9,56E-01 | 1,00E+00 | Hhipl1   | 0,96 | No  |

|                    |           |              |          |          |          |               |      |     |
|--------------------|-----------|--------------|----------|----------|----------|---------------|------|-----|
| ENSMUSG00000021262 | 3,02E-01  | 6,236727713  | 2,22E+01 | 2,51E-06 | 9,85E-05 | Evl           | 1,23 | Yes |
| ENSMUSG00000021263 | 2,49E-01  | 3,602292417  | 6,66E+00 | 9,87E-03 | 9,24E-02 | Degs2         | 1,19 | No  |
| ENSMUSG00000021264 | -2,14E-02 | 6,656477406  | 1,20E-01 | 7,29E-01 | 9,20E-01 | Yy1           | 0,99 | No  |
| ENSMUSG00000021265 | -7,55E-01 | 2,935820931  | 4,67E+01 | 8,31E-12 | 8,86E-10 | Slc25a29      | 0,59 | Yes |
| ENSMUSG00000021266 | -1,53E-01 | 6,097340223  | 5,61E+00 | 1,79E-02 | 1,40E-01 | Wars          | 0,90 | No  |
| ENSMUSG00000021268 | -3,88E-03 | -3,03362684  | 4,02E-12 | 1,00E+00 | 1,00E+00 | Meg3          | 1,00 | No  |
| ENSMUSG00000021270 | 3,35E-02  | 6,727729014  | 2,96E-01 | 5,86E-01 | 8,40E-01 | Hsp90aa1      | 1,02 | No  |
| ENSMUSG00000021271 | 1,82E-01  | 3,811533825  | 3,99E+00 | 4,56E-02 | 2,55E-01 | Zfp839        | 1,13 | No  |
| ENSMUSG00000021273 | 1,73E-01  | 5,475626249  | 6,22E+00 | 1,26E-02 | 1,11E-01 | Fdft1         | 1,13 | No  |
| ENSMUSG00000021275 | 1,21E-01  | 4,533877998  | 2,29E+00 | 1,30E-01 | 4,53E-01 | Tecpr2        | 1,09 | No  |
| ENSMUSG00000021276 | 6,83E-02  | 4,588103414  | 7,40E-01 | 3,90E-01 | 6,90E-01 | Cinp          | 1,05 | No  |
| ENSMUSG00000021277 | -2,15E-01 | 6,044236937  | 1,09E+01 | 9,59E-04 | 1,56E-02 | Traf3         | 0,86 | Yes |
| ENSMUSG00000021278 | 3,23E-01  | -1,35565587  | 4,72E-01 | 4,92E-01 | 7,78E-01 | Amn           | 1,25 | No  |
| ENSMUSG00000021279 | -5,53E-02 | 6,781934985  | 8,08E-01 | 3,69E-01 | 6,70E-01 | Cdc42bpb      | 0,96 | No  |
| ENSMUSG00000021280 | -6,88E-01 | 3,479521277  | 4,98E+01 | 1,69E-12 | 2,00E-10 | Exoc3l4       | 0,62 | Yes |
| ENSMUSG00000021281 | -1,72E-01 | 8,539272141  | 8,98E+00 | 2,72E-03 | 3,55E-02 | Tnfaip2       | 0,89 | Yes |
| ENSMUSG00000021282 | 2,90E-02  | 8,463053294  | 2,54E-01 | 6,14E-01 | 8,53E-01 | Eif5          | 1,02 | No  |
| ENSMUSG00000021285 | 2,33E-01  | 5,110567236  | 1,04E+01 | 1,28E-03 | 1,98E-02 | Ppp1r13b      | 1,18 | Yes |
| ENSMUSG00000021286 | 2,26E-01  | 3,330652148  | 4,66E+00 | 3,10E-02 | 2,03E-01 | Zfyve21       | 1,17 | No  |
| ENSMUSG00000021287 | 3,99E-02  | 4,053242493  | 2,07E-01 | 6,49E-01 | 8,75E-01 | Xrcc3         | 1,03 | No  |
| ENSMUSG00000021288 | -1,32E-02 | 6,375109249  | 4,38E-02 | 8,34E-01 | 9,79E-01 | Klc1          | 0,99 | No  |
| ENSMUSG00000021290 | -1,22E-01 | 5,481170363  | 3,09E+00 | 7,86E-02 | 3,58E-01 | 2010107E04Rik | 0,92 | No  |
| ENSMUSG00000021294 | -2,66E+00 | -2,896122337 | 2,83E+00 | 9,26E-02 | 3,83E-01 | Kif26a        | 0,16 | No  |
| ENSMUSG00000021298 | -5,84E-01 | 7,192664432  | 9,45E+01 | 2,45E-22 | 7,12E-20 | Gpr132        | 0,67 | Yes |
| ENSMUSG00000021301 | 1,85E+00  | -3,107657832 | 1,35E+00 | 2,46E-01 | 5,50E-01 | Hecw1         | 3,61 | No  |
| ENSMUSG00000021302 | 6,40E-02  | 4,095594266  | 5,51E-01 | 4,58E-01 | 7,47E-01 | Ggps1         | 1,05 | No  |
| ENSMUSG00000021303 | -4,33E-01 | -1,627547441 | 6,96E-01 | 4,04E-01 | 7,01E-01 | Gng4          | 0,74 | No  |
| ENSMUSG00000021306 | 1,31E-01  | 6,388396572  | 4,27E+00 | 3,88E-02 | 2,33E-01 | Gpr137b       | 1,09 | No  |
| ENSMUSG00000021311 | 1,94E-01  | 5,464456597  | 7,76E+00 | 5,34E-03 | 5,86E-02 | Mtr           | 1,14 | No  |
| ENSMUSG00000021313 | -7,20E-01 | -2,497566786 | 5,81E-01 | 4,46E-01 | 7,37E-01 | Ryr2          | 0,61 | No  |
| ENSMUSG00000021314 | -1,87E+00 | -3,03364178  | 1,41E+00 | 2,36E-01 | 5,50E-01 | Amph          | 0,27 | No  |
| ENSMUSG00000021318 | -4,09E-01 | -0,311087367 | 1,69E+00 | 1,93E-01 | 5,50E-01 | Gli3          | 0,75 | No  |

|                    |           |              |          |          |          |         |      |     |
|--------------------|-----------|--------------|----------|----------|----------|---------|------|-----|
| ENSMUSG00000021319 | -3,45E+00 | -2,1855089   | 1,41E+01 | 1,74E-04 | 3,86E-03 | Sfrp4   | 0,09 | Yes |
| ENSMUSG00000021322 | 2,41E-01  | 4,819462663  | 9,83E+00 | 1,72E-03 | 2,47E-02 | Aoah    | 1,18 | Yes |
| ENSMUSG00000021326 | -1,46E-02 | 5,318423774  | 4,31E-02 | 8,36E-01 | 9,80E-01 | Trim27  | 0,99 | No  |
| ENSMUSG00000021327 | -9,26E-02 | 5,914737529  | 2,00E+00 | 1,57E-01 | 5,03E-01 | Zkscan3 | 0,94 | No  |
| ENSMUSG00000021336 | -5,88E-02 | -3,033652696 | 1,62E-03 | 9,68E-01 | 1,00E+00 | Slc17a4 | 0,96 | No  |
| ENSMUSG00000021338 | 4,04E-02  | 2,807716357  | 1,17E-01 | 7,32E-01 | 9,22E-01 | Carmil1 | 1,03 | No  |
| ENSMUSG00000021339 | 9,36E-02  | 5,952225883  | 2,03E+00 | 1,54E-01 | 4,98E-01 | Mrs2    | 1,07 | No  |
| ENSMUSG00000021340 | 5,81E-02  | 4,07114626   | 4,44E-01 | 5,05E-01 | 7,90E-01 | Gpld1   | 1,04 | No  |
| ENSMUSG00000021356 | -2,08E-01 | 8,723642362  | 1,32E+01 | 2,84E-04 | 5,79E-03 | Irf4    | 0,87 | Yes |
| ENSMUSG00000021357 | -1,21E-02 | 6,215871066  | 3,55E-02 | 8,51E-01 | 9,90E-01 | Exoc2   | 0,99 | No  |
| ENSMUSG00000021359 | 2,97E-01  | -1,963247285 | 1,72E-01 | 6,78E-01 | 8,92E-01 | Tfap2a  | 1,23 | No  |
| ENSMUSG00000021360 | 5,66E-02  | 6,115540538  | 7,56E-01 | 3,85E-01 | 6,86E-01 | Gcnt2   | 1,04 | No  |
| ENSMUSG00000021361 | 5,51E-02  | 6,427667436  | 7,61E-01 | 3,83E-01 | 6,84E-01 | Tmem14c | 1,04 | No  |
| ENSMUSG00000021362 | -1,41E-01 | -0,548309313 | 1,23E-01 | 7,26E-01 | 9,19E-01 | Gcm2    | 0,91 | No  |
| ENSMUSG00000021363 | 1,96E-01  | 2,921142674  | 2,75E+00 | 9,70E-02 | 3,88E-01 | Mak     | 1,15 | No  |
| ENSMUSG00000021364 | -5,56E-01 | -2,832021161 | 2,41E-01 | 6,23E-01 | 8,58E-01 | Elovl2  | 0,68 | No  |
| ENSMUSG00000021365 | 1,67E-01  | 6,091399281  | 6,54E+00 | 1,05E-02 | 9,71E-02 | Nedd9   | 1,12 | No  |
| ENSMUSG00000021366 | -3,11E-01 | 7,490351563  | 2,76E+01 | 1,49E-07 | 7,96E-06 | Hivep1  | 0,81 | Yes |
| ENSMUSG00000021367 | -6,62E-01 | 1,188491007  | 1,01E+01 | 1,45E-03 | 2,17E-02 | Edn1    | 0,63 | Yes |
| ENSMUSG00000021368 | -2,61E-02 | 2,926380299  | 5,22E-02 | 8,19E-01 | 9,71E-01 | Tbc1d7  | 0,98 | No  |
| ENSMUSG00000021371 | 1,18E-02  | 6,339737613  | 3,47E-02 | 8,52E-01 | 9,91E-01 | Mcur1   | 1,01 | No  |
| ENSMUSG00000021373 | 1,05E+00  | -1,401443877 | 3,72E+00 | 5,37E-02 | 2,83E-01 | Cap2    | 2,07 | No  |
| ENSMUSG00000021374 | 6,93E-02  | 7,716833625  | 1,39E+00 | 2,38E-01 | 5,50E-01 | Nup153  | 1,05 | No  |
| ENSMUSG00000021375 | -5,06E-03 | 6,128859312  | 6,08E-03 | 9,38E-01 | 1,00E+00 | Kif13a  | 1,00 | No  |
| ENSMUSG00000021376 | 1,71E-01  | 1,980710024  | 1,21E+00 | 2,71E-01 | 5,68E-01 | Tpmt    | 1,13 | No  |
| ENSMUSG00000021377 | 8,34E-02  | 7,337664981  | 1,95E+00 | 1,62E-01 | 5,12E-01 | Dek     | 1,06 | No  |
| ENSMUSG00000021379 | -1,94E+00 | -3,107619243 | 1,50E+00 | 2,21E-01 | 5,50E-01 | Id4     | 0,26 | No  |
| ENSMUSG00000021384 | -6,34E-03 | 4,911214074  | 7,18E-03 | 9,32E-01 | 1,00E+00 | Susd3   | 1,00 | No  |
| ENSMUSG00000021385 | 2,33E-01  | 3,299226278  | 4,94E+00 | 2,63E-02 | 1,81E-01 | lppk    | 1,18 | No  |
| ENSMUSG00000021388 | 8,35E-01  | -2,107641426 | 8,39E-01 | 3,60E-01 | 6,61E-01 | Aspn    | 1,78 | No  |
| ENSMUSG00000021390 | -1,33E+00 | -2,600661346 | 1,11E+00 | 2,92E-01 | 5,87E-01 | Ogn     | 0,40 | No  |
| ENSMUSG00000021391 | 1,90E-01  | 1,193444136  | 9,28E-01 | 3,35E-01 | 6,36E-01 | Cenpp   | 1,14 | No  |

|                    |           |              |           |          |          |               |      |     |
|--------------------|-----------|--------------|-----------|----------|----------|---------------|------|-----|
| ENSMUSG00000021392 | 2,06E-01  | 4,407154172  | 6,37E+00  | 1,16E-02 | 1,04E-01 | Nol8          | 1,15 | No  |
| ENSMUSG00000021395 | -3,76E-03 | 5,746339624  | 3,15E-03  | 9,55E-01 | 1,00E+00 | Spin1         | 1,00 | No  |
| ENSMUSG00000021396 | -2,71E+00 | -2,963182239 | 2,92E+00  | 8,75E-02 | 3,78E-01 | Nxn12         | 0,15 | No  |
| ENSMUSG00000021400 | -3,16E-02 | 5,181900424  | 1,92E-01  | 6,61E-01 | 8,82E-01 | Wrnip1        | 0,98 | No  |
| ENSMUSG00000021403 | -3,75E-01 | 3,595008599  | 1,53E+01  | 9,17E-05 | 2,26E-03 | Serpinb9b     | 0,77 | Yes |
| ENSMUSG00000021408 | -9,65E-03 | 6,885004606  | 2,49E-02  | 8,75E-01 | 1,00E+00 | Ripk1         | 0,99 | No  |
| ENSMUSG00000021411 | 7,09E-02  | 4,530466845  | 7,61E-01  | 3,83E-01 | 6,84E-01 | Pxdc1         | 1,05 | No  |
| ENSMUSG00000021413 | 1,49E-02  | 6,990213898  | 6,02E-02  | 8,06E-01 | 9,64E-01 | Prpf4b        | 1,01 | No  |
| ENSMUSG00000021414 | -4,09E+00 | -2,311069297 | 8,48E+00  | 3,60E-03 | 4,38E-02 | Fam217a       | 0,06 | Yes |
| ENSMUSG00000021415 | -4,86E-01 | -2,711728345 | 2,13E-01  | 6,44E-01 | 8,72E-01 | 4933417A18Rik | 0,71 | No  |
| ENSMUSG00000021416 | -2,48E-01 | 0,385887765  | 9,62E-01  | 3,27E-01 | 6,28E-01 | Eci3          | 0,84 | No  |
| ENSMUSG00000021417 | 2,49E-04  | 5,56742538   | 1,32E-05  | 9,97E-01 | 1,00E+00 | Eci2          | 1,00 | No  |
| ENSMUSG00000021418 | -4,69E-02 | 1,425967264  | 6,85E-02  | 7,93E-01 | 9,56E-01 | Rpp40         | 0,97 | No  |
| ENSMUSG00000021420 | 1,43E-01  | 4,010979297  | 2,59E+00  | 1,08E-01 | 4,02E-01 | Fars2         | 1,10 | No  |
| ENSMUSG00000021423 | 7,50E-02  | 6,329504221  | 1,38E+00  | 2,40E-01 | 5,50E-01 | Ly86          | 1,05 | No  |
| ENSMUSG00000021427 | 9,02E-02  | 7,927042247  | 2,39E+00  | 1,22E-01 | 4,37E-01 | Ssr1          | 1,06 | No  |
| ENSMUSG00000021428 | -1,38E-01 | 4,819563656  | 3,23E+00  | 7,24E-02 | 3,41E-01 | Riok1         | 0,91 | No  |
| ENSMUSG00000021431 | -7,60E-02 | 5,162392742  | 1,11E+00  | 2,92E-01 | 5,88E-01 | Snrnp48       | 0,95 | No  |
| ENSMUSG00000021432 | 1,79E-02  | 5,838888917  | 7,18E-02  | 7,89E-01 | 9,54E-01 | Slc35b3       | 1,01 | No  |
| ENSMUSG00000021448 | -8,94E-01 | -2,83199835  | 4,38E-01  | 5,08E-01 | 7,92E-01 | Shc3          | 0,54 | No  |
| ENSMUSG00000021451 | 1,22E-01  | 7,69552918   | 4,33E+00  | 3,74E-02 | 2,30E-01 | Sema4d        | 1,09 | No  |
| ENSMUSG00000021453 | 3,56E-02  | 4,852998838  | 2,16E-01  | 6,42E-01 | 8,71E-01 | Gadd45g       | 1,03 | No  |
| ENSMUSG00000021457 | -1,10E-01 | 8,794571834  | 3,68E+00  | 5,51E-02 | 2,88E-01 | Syk           | 0,93 | No  |
| ENSMUSG00000021458 | 1,91E-01  | 5,775030499  | 8,02E+00  | 4,62E-03 | 5,26E-02 | 2010111I01Rik | 1,14 | No  |
| ENSMUSG00000021460 | -3,46E-01 | 5,056970207  | 2,26E+01  | 2,02E-06 | 8,18E-05 | Auh           | 0,79 | Yes |
| ENSMUSG00000021461 | 2,25E-02  | 3,52395394   | 5,22E-02  | 8,19E-01 | 9,71E-01 | Fancc         | 1,02 | No  |
| ENSMUSG00000021464 | 9,01E-03  | -3,107646452 | -5,16E-10 | 1,00E+00 | 1,00E+00 | Ror2          | 1,01 | No  |
| ENSMUSG00000021466 | 1,59E-01  | 4,525229318  | 3,93E+00  | 4,75E-02 | 2,61E-01 | Ptch1         | 1,12 | No  |
| ENSMUSG00000021468 | 7,39E-02  | 5,452470774  | 1,12E+00  | 2,89E-01 | 5,85E-01 | Sptlc1        | 1,05 | No  |
| ENSMUSG00000021470 | 1,34E-01  | 4,774239633  | 3,03E+00  | 8,16E-02 | 3,67E-01 | Ercc6l2       | 1,10 | No  |
| ENSMUSG00000021474 | 5,24E-02  | 5,722397318  | 5,98E-01  | 4,39E-01 | 7,32E-01 | Sfxn1         | 1,04 | No  |
| ENSMUSG00000021476 | 8,54E-02  | 4,110264978  | 9,64E-01  | 3,26E-01 | 6,27E-01 | Habp4         | 1,06 | No  |



|                    |           |              |           |          |          |               |      |     |
|--------------------|-----------|--------------|-----------|----------|----------|---------------|------|-----|
| ENSMUSG00000021477 | -1,37E-01 | 8,469536807  | 5,65E+00  | 1,75E-02 | 1,38E-01 | Ctsl          | 0,91 | No  |
| ENSMUSG00000021478 | 2,20E-01  | -1,070137339 | 2,37E-01  | 6,26E-01 | 8,60E-01 | Drd1          | 1,16 | No  |
| ENSMUSG00000021481 | 4,88E-02  | 3,915593185  | 3,06E-01  | 5,80E-01 | 8,37E-01 | Zfp346        | 1,03 | No  |
| ENSMUSG00000021482 | 1,32E-01  | 4,850812489  | 3,04E+00  | 8,11E-02 | 3,66E-01 | Aaed1         | 1,10 | No  |
| ENSMUSG00000021483 | 2,29E-01  | 3,258436369  | 4,76E+00  | 2,91E-02 | 1,94E-01 | Cdk20         | 1,17 | No  |
| ENSMUSG00000021484 | 1,12E-01  | 7,771810256  | 3,65E+00  | 5,60E-02 | 2,90E-01 | Lman2         | 1,08 | No  |
| ENSMUSG00000021485 | 6,49E-02  | 4,86803243   | 7,38E-01  | 3,90E-01 | 6,91E-01 | Mxd3          | 1,05 | No  |
| ENSMUSG00000021486 | 6,56E-02  | 7,485306956  | 1,22E+00  | 2,69E-01 | 5,65E-01 | Preli1        | 1,05 | No  |
| ENSMUSG00000021488 | -7,61E-02 | 7,609410064  | 1,66E+00  | 1,97E-01 | 5,50E-01 | Nsd1          | 0,95 | No  |
| ENSMUSG00000021490 | 2,63E+00  | -2,497532259 | 2,68E+00  | 1,02E-01 | 3,94E-01 | Slc34a1       | 6,20 | No  |
| ENSMUSG00000021492 | -1,87E+00 | -3,03364178  | 1,41E+00  | 2,36E-01 | 5,50E-01 | F12           | 0,27 | No  |
| ENSMUSG00000021493 | 1,88E-01  | 4,819979901  | 6,02E+00  | 1,41E-02 | 1,21E-01 | Pdlim7        | 1,14 | No  |
| ENSMUSG00000021494 | 2,61E-02  | 5,128174662  | 1,29E-01  | 7,20E-01 | 9,15E-01 | Ddx41         | 1,02 | No  |
| ENSMUSG00000021495 | -6,61E-02 | 6,037185562  | 1,04E+00  | 3,08E-01 | 6,06E-01 | Fam193b       | 0,96 | No  |
| ENSMUSG00000021496 | -1,41E-01 | 3,378806713  | 1,92E+00  | 1,66E-01 | 5,18E-01 | Pcbd2         | 0,91 | No  |
| ENSMUSG00000021497 | -1,19E-02 | 5,572988137  | 2,99E-02  | 8,63E-01 | 9,97E-01 | Txndc15       | 0,99 | No  |
| ENSMUSG00000021499 | -3,57E-02 | -2,711633193 | 8,91E-04  | 9,76E-01 | 1,00E+00 | Catsper3      | 0,98 | No  |
| ENSMUSG00000021500 | 4,20E-02  | 6,887833646  | 4,74E-01  | 4,91E-01 | 7,77E-01 | Ddx46         | 1,03 | No  |
| ENSMUSG00000021501 | -5,57E-02 | 4,541449118  | 4,95E-01  | 4,82E-01 | 7,69E-01 | Cam1          | 0,96 | No  |
| ENSMUSG00000021504 | 2,26E-01  | 4,8762915    | 8,91E+00  | 2,84E-03 | 3,67E-02 | B4galt7       | 1,17 | Yes |
| ENSMUSG00000021506 | -7,47E-02 | -2,033711201 | 1,03E-02  | 9,19E-01 | 1,00E+00 | Pitx1         | 0,95 | No  |
| ENSMUSG00000021508 | -1,73E-01 | 0,08752771   | 3,99E-01  | 5,27E-01 | 8,04E-01 | Cxcl14        | 0,89 | No  |
| ENSMUSG00000021509 | 1,82E+00  | -3,033667329 | 1,31E+00  | 2,52E-01 | 5,50E-01 | Slc25a48      | 3,54 | No  |
| ENSMUSG00000021510 | 1,71E-01  | 4,185006115  | 4,05E+00  | 4,41E-02 | 2,50E-01 | Zfp729a       | 1,13 | No  |
| ENSMUSG00000021514 | 1,65E-02  | 4,491586204  | 4,26E-02  | 8,36E-01 | 9,81E-01 | Zfp369        | 1,01 | No  |
| ENSMUSG00000021518 | 5,79E-02  | 6,113651031  | 7,98E-01  | 3,72E-01 | 6,73E-01 | Ptdss1        | 1,04 | No  |
| ENSMUSG00000021519 | 3,50E-02  | 4,573371577  | 1,93E-01  | 6,61E-01 | 8,82E-01 | Mterf3        | 1,02 | No  |
| ENSMUSG00000021520 | 3,25E-02  | 4,284544423  | 1,50E-01  | 6,99E-01 | 9,04E-01 | Uqcrb         | 1,02 | No  |
| ENSMUSG00000021532 | 1,58E-01  | 3,678593519  | 2,79E+00  | 9,50E-02 | 3,86E-01 | Fastkd3       | 1,12 | No  |
| ENSMUSG00000021534 | 9,01E-03  | -3,107646452 | -5,16E-10 | 1,00E+00 | 1,00E+00 | 1700001L19Rik | 1,01 | No  |
| ENSMUSG00000021536 | -3,18E+00 | -2,896135562 | 4,24E+00  | 3,94E-02 | 2,35E-01 | Adcy2         | 0,11 | No  |
| ENSMUSG00000021537 | 1,92E-02  | 5,117278172  | 7,00E-02  | 7,91E-01 | 9,55E-01 | Cetn3         | 1,01 | No  |

|                    |           |              |           |          |          |               |      |     |
|--------------------|-----------|--------------|-----------|----------|----------|---------------|------|-----|
| ENSMUSG00000021539 | 1,87E+00  | -3,107639691 | 1,38E+00  | 2,40E-01 | 5,50E-01 | Lect2         | 3,67 | No  |
| ENSMUSG00000021540 | 4,66E-02  | 4,538103466  | 3,46E-01  | 5,56E-01 | 8,21E-01 | Smad5         | 1,03 | No  |
| ENSMUSG00000021546 | 5,26E-03  | 7,948190503  | 8,14E-03  | 9,28E-01 | 1,00E+00 | Hnrnpk        | 1,00 | No  |
| ENSMUSG00000021548 | 2,09E-01  | 3,696303121  | 4,78E+00  | 2,88E-02 | 1,93E-01 | Ccnh          | 1,16 | No  |
| ENSMUSG00000021549 | 1,36E-01  | 5,638858843  | 4,00E+00  | 4,54E-02 | 2,54E-01 | Rasa1         | 1,10 | No  |
| ENSMUSG00000021550 | 5,79E-02  | 5,523132656  | 7,00E-01  | 4,03E-01 | 7,01E-01 | 2210016F16Rik | 1,04 | No  |
| ENSMUSG00000021552 | 7,66E-02  | 2,513421479  | 3,45E-01  | 5,57E-01 | 8,21E-01 | Gkap1         | 1,05 | No  |
| ENSMUSG00000021553 | -1,66E-01 | -0,020032211 | 2,96E-01  | 5,87E-01 | 8,40E-01 | Slc28a3       | 0,89 | No  |
| ENSMUSG00000021555 | 5,17E-02  | 4,915415864  | 4,79E-01  | 4,89E-01 | 7,76E-01 | Naa35         | 1,04 | No  |
| ENSMUSG00000021556 | 1,47E-01  | 5,620831864  | 4,66E+00  | 3,09E-02 | 2,03E-01 | Golm1         | 1,11 | No  |
| ENSMUSG00000021557 | -1,39E-02 | 5,270221161  | 3,78E-02  | 8,46E-01 | 9,87E-01 | Agtppbp1      | 0,99 | No  |
| ENSMUSG00000021559 | 8,23E-02  | 7,301860644  | 1,89E+00  | 1,69E-01 | 5,24E-01 | Dapk1         | 1,06 | No  |
| ENSMUSG00000021565 | -2,95E-01 | -0,785532637 | 5,45E-01  | 4,60E-01 | 7,49E-01 | Slc6a19       | 0,82 | No  |
| ENSMUSG00000021567 | -2,67E+00 | -2,831936341 | 2,83E+00  | 9,22E-02 | 3,82E-01 | Nkd2          | 0,16 | No  |
| ENSMUSG00000021569 | 8,60E-02  | 3,629175466  | 7,97E-01  | 3,72E-01 | 6,73E-01 | Trip13        | 1,06 | No  |
| ENSMUSG00000021572 | 1,30E-01  | 3,16546193   | 1,43E+00  | 2,31E-01 | 5,50E-01 | Cep72         | 1,09 | No  |
| ENSMUSG00000021573 | -7,54E-02 | -2,497623035 | 6,53E-03  | 9,36E-01 | 1,00E+00 | Tppp          | 0,95 | No  |
| ENSMUSG00000021575 | -3,32E-01 | 6,451778616  | 2,80E+01  | 1,24E-07 | 6,77E-06 | Ahrr          | 0,79 | Yes |
| ENSMUSG00000021576 | 5,51E-02  | 6,394052495  | 7,61E-01  | 3,83E-01 | 6,85E-01 | Pdcd6         | 1,04 | No  |
| ENSMUSG00000021577 | -1,27E-02 | 7,895137533  | 4,76E-02  | 8,27E-01 | 9,76E-01 | Sdha          | 0,99 | No  |
| ENSMUSG00000021578 | 5,90E-02  | 4,950041675  | 6,35E-01  | 4,25E-01 | 7,20E-01 | Ccdc127       | 1,04 | No  |
| ENSMUSG00000021579 | -1,85E-02 | 1,163917772  | 9,20E-03  | 9,24E-01 | 1,00E+00 | Lrrc14b       | 0,99 | No  |
| ENSMUSG00000021583 | 8,49E-03  | 6,627226516  | 1,87E-02  | 8,91E-01 | 1,00E+00 | Erap1         | 1,01 | No  |
| ENSMUSG00000021585 | 7,54E-02  | 6,250656463  | 1,39E+00  | 2,39E-01 | 5,50E-01 | Cast          | 1,05 | No  |
| ENSMUSG00000021587 | -3,83E-02 | -3,107651936 | -7,91E-11 | 1,00E+00 | 1,00E+00 | Pcsk1         | 0,97 | No  |
| ENSMUSG00000021589 | -1,03E+00 | -1,711732385 | 2,34E+00  | 1,26E-01 | 4,44E-01 | Rhobtb3       | 0,49 | No  |
| ENSMUSG00000021590 | -1,23E+00 | -2,600642831 | 1,46E+00  | 2,27E-01 | 5,50E-01 | Spata9        | 0,43 | No  |
| ENSMUSG00000021591 | 1,27E-01  | 6,567053298  | 4,09E+00  | 4,32E-02 | 2,47E-01 | Glrx          | 1,09 | No  |
| ENSMUSG00000021592 | 2,29E-01  | 4,217867763  | 7,32E+00  | 6,82E-03 | 7,04E-02 | Arsk          | 1,17 | No  |
| ENSMUSG00000021594 | -1,47E-01 | 1,582390917  | 6,98E-01  | 4,03E-01 | 7,01E-01 | Srd5a1        | 0,90 | No  |
| ENSMUSG00000021595 | 1,14E-01  | 6,270463023  | 3,20E+00  | 7,38E-02 | 3,45E-01 | Nsun2         | 1,08 | No  |
| ENSMUSG00000021596 | 1,59E-01  | 4,296293318  | 3,55E+00  | 5,94E-02 | 3,02E-01 | Mctp1         | 1,12 | No  |

|                    |           |              |          |          |          |            |      |     |
|--------------------|-----------|--------------|----------|----------|----------|------------|------|-----|
| ENSMUSG00000021597 | 2,43E-01  | 3,476325051  | 5,85E+00 | 1,56E-02 | 1,29E-01 | Slf1       | 1,18 | No  |
| ENSMUSG00000021598 | -1,50E-01 | 4,207907214  | 3,11E+00 | 7,76E-02 | 3,56E-01 | Med10      | 0,90 | No  |
| ENSMUSG00000021606 | -1,04E-01 | 3,220805892  | 9,39E-01 | 3,32E-01 | 6,33E-01 | Ndufs6     | 0,93 | No  |
| ENSMUSG00000021607 | 1,55E-01  | 4,957856593  | 4,29E+00 | 3,82E-02 | 2,32E-01 | Mrpl36     | 1,11 | No  |
| ENSMUSG00000021608 | -2,30E-01 | 6,246397028  | 1,31E+01 | 3,02E-04 | 6,09E-03 | Lpcat1     | 0,85 | Yes |
| ENSMUSG00000021609 | 3,23E-01  | -1,770663598 | 2,78E-01 | 5,98E-01 | 8,45E-01 | Slc6a3     | 1,25 | No  |
| ENSMUSG00000021610 | 7,17E-02  | 6,786470645  | 1,36E+00 | 2,44E-01 | 5,50E-01 | Clptm1l    | 1,05 | No  |
| ENSMUSG00000021611 | -1,48E+00 | -1,574172298 | 7,36E+00 | 6,66E-03 | 6,93E-02 | Tert       | 0,36 | No  |
| ENSMUSG00000021614 | -1,84E-01 | 6,428833125  | 8,52E+00 | 3,51E-03 | 4,30E-02 | Vcan       | 0,88 | Yes |
| ENSMUSG00000021615 | -8,43E-02 | 2,945680323  | 5,33E-01 | 4,65E-01 | 7,54E-01 | Xrcc4      | 0,94 | No  |
| ENSMUSG00000021619 | -1,40E-01 | 2,379869769  | 1,07E+00 | 3,02E-01 | 5,98E-01 | Atg10      | 0,91 | No  |
| ENSMUSG00000021620 | 5,75E-01  | -2,998032116 | 1,32E-01 | 7,16E-01 | 9,13E-01 | Acot12     | 1,49 | No  |
| ENSMUSG00000021621 | -1,70E-01 | 4,835727814  | 5,02E+00 | 2,51E-02 | 1,75E-01 | Zcchc9     | 0,89 | No  |
| ENSMUSG00000021624 | 6,82E-02  | 6,645008531  | 1,20E+00 | 2,74E-01 | 5,71E-01 | Cd180      | 1,05 | No  |
| ENSMUSG00000021629 | 1,04E-01  | 5,935831208  | 2,46E+00 | 1,16E-01 | 4,23E-01 | Slc30a5    | 1,07 | No  |
| ENSMUSG00000021631 | -6,39E-02 | 3,89593363   | 4,86E-01 | 4,86E-01 | 7,73E-01 | Mrps36-ps1 | 0,96 | No  |
| ENSMUSG00000021635 | 1,66E-01  | 4,422235422  | 4,19E+00 | 4,07E-02 | 2,39E-01 | Rad17      | 1,12 | No  |
| ENSMUSG00000021636 | -1,73E-01 | 2,661867035  | 2,00E+00 | 1,57E-01 | 5,03E-01 | Marveld2   | 0,89 | No  |
| ENSMUSG00000021638 | -6,53E-01 | 1,615946472  | 1,61E+01 | 6,12E-05 | 1,61E-03 | Ocln       | 0,64 | Yes |
| ENSMUSG00000021639 | 6,00E-02  | 3,775075857  | 4,02E-01 | 5,26E-01 | 8,03E-01 | Gtf2h2     | 1,04 | No  |
| ENSMUSG00000021640 | 1,17E-01  | 1,792392975  | 5,47E-01 | 4,59E-01 | 7,49E-01 | Naip1      | 1,08 | No  |
| ENSMUSG00000021643 | 1,51E-02  | 1,410829747  | 6,94E-03 | 9,34E-01 | 1,00E+00 | Serf1      | 1,01 | No  |
| ENSMUSG00000021645 | 1,45E-01  | 3,999767616  | 2,62E+00 | 1,06E-01 | 3,98E-01 | Smn1       | 1,11 | No  |
| ENSMUSG00000021646 | -1,34E-01 | 3,008525421  | 1,39E+00 | 2,39E-01 | 5,50E-01 | Mccc2      | 0,91 | No  |
| ENSMUSG00000021650 | 1,01E-01  | 4,894420895  | 1,80E+00 | 1,79E-01 | 5,40E-01 | Ptcd2      | 1,07 | No  |
| ENSMUSG00000021660 | -4,17E-02 | 5,664149885  | 3,83E-01 | 5,36E-01 | 8,08E-01 | Btf3       | 0,97 | No  |
| ENSMUSG00000021661 | -1,26E-01 | 3,861852451  | 1,87E+00 | 1,72E-01 | 5,28E-01 | Ankra2     | 0,92 | No  |
| ENSMUSG00000021662 | 6,97E-01  | -2,070312088 | 8,66E-01 | 3,52E-01 | 6,53E-01 | Arhgef28   | 1,62 | No  |
| ENSMUSG00000021665 | 1,06E-01  | 6,497288891  | 2,84E+00 | 9,20E-02 | 3,82E-01 | Hexb       | 1,08 | No  |
| ENSMUSG00000021666 | 1,02E-01  | 5,210680812  | 2,02E+00 | 1,55E-01 | 4,98E-01 | Gfm2       | 1,07 | No  |
| ENSMUSG00000021668 | 2,22E-01  | 4,540862308  | 7,85E+00 | 5,10E-03 | 5,67E-02 | Polk       | 1,17 | No  |
| ENSMUSG00000021669 | 5,81E-02  | 6,640987119  | 8,74E-01 | 3,50E-01 | 6,51E-01 | Col4a3bp   | 1,04 | No  |

|                    |           |              |          |          |          |          |      |     |
|--------------------|-----------|--------------|----------|----------|----------|----------|------|-----|
| ENSMUSG00000021670 | 1,86E-01  | 7,610010761  | 9,88E+00 | 1,67E-03 | 2,42E-02 | Hmgcr    | 1,14 | Yes |
| ENSMUSG00000021671 | 1,75E-01  | 4,130183482  | 4,07E+00 | 4,37E-02 | 2,49E-01 | Poc5     | 1,13 | No  |
| ENSMUSG00000021675 | 2,96E-01  | 6,426516872  | 2,17E+01 | 3,16E-06 | 1,22E-04 | F2rl2    | 1,23 | Yes |
| ENSMUSG00000021676 | -1,36E-01 | 4,235595511  | 2,53E+00 | 1,12E-01 | 4,11E-01 | lqgap2   | 0,91 | No  |
| ENSMUSG00000021678 | -1,13E+00 | -1,654956846 | 3,82E+00 | 5,06E-02 | 2,73E-01 | F2rl1    | 0,46 | No  |
| ENSMUSG00000021680 | -1,69E+00 | -2,146090028 | 4,32E+00 | 3,76E-02 | 2,30E-01 | Crhbp    | 0,31 | No  |
| ENSMUSG00000021681 | 4,34E-02  | 5,850919363  | 4,28E-01 | 5,13E-01 | 7,95E-01 | Aggf1    | 1,03 | No  |
| ENSMUSG00000021684 | 2,84E-01  | 3,07155816   | 6,45E+00 | 1,11E-02 | 1,01E-01 | Pde8b    | 1,22 | No  |
| ENSMUSG00000021686 | -2,11E-01 | 7,454133433  | 1,26E+01 | 3,82E-04 | 7,37E-03 | Ap3b1    | 0,86 | Yes |
| ENSMUSG00000021687 | -6,68E-03 | 6,686633734  | 1,16E-02 | 9,14E-01 | 1,00E+00 | Scamp1   | 1,00 | No  |
| ENSMUSG00000021690 | 1,31E-01  | 4,018679996  | 2,19E+00 | 1,39E-01 | 4,70E-01 | Jmy      | 1,09 | No  |
| ENSMUSG00000021692 | 5,46E-02  | 1,557071603  | 9,70E-02 | 7,55E-01 | 9,34E-01 | Dimt1    | 1,04 | No  |
| ENSMUSG00000021693 | -7,46E-02 | 4,939297215  | 9,98E-01 | 3,18E-01 | 6,19E-01 | Kif2a    | 0,95 | No  |
| ENSMUSG00000021694 | 2,78E-01  | 2,411708024  | 4,22E+00 | 3,99E-02 | 2,37E-01 | Ercc8    | 1,21 | No  |
| ENSMUSG00000021696 | 1,48E-01  | 4,118539803  | 2,89E+00 | 8,91E-02 | 3,79E-01 | Elovl7   | 1,11 | No  |
| ENSMUSG00000021697 | 1,94E-01  | 3,262470823  | 3,28E+00 | 7,01E-02 | 3,34E-01 | Depdc1b  | 1,14 | No  |
| ENSMUSG00000021699 | -3,47E-01 | 3,993494596  | 1,54E+01 | 8,93E-05 | 2,21E-03 | Pde4d    | 0,79 | Yes |
| ENSMUSG00000021700 | -1,89E+00 | -3,1076441   | 1,42E+00 | 2,33E-01 | 5,50E-01 | Rab3c    | 0,27 | No  |
| ENSMUSG00000021701 | -4,14E-02 | 7,209968085  | 4,74E-01 | 4,91E-01 | 7,77E-01 | Plk2     | 0,97 | No  |
| ENSMUSG00000021702 | -8,82E-01 | -1,401261442 | 3,34E+00 | 6,78E-02 | 3,28E-01 | Thbs4    | 0,54 | No  |
| ENSMUSG00000021703 | -4,45E-01 | 5,202780214  | 3,88E+01 | 4,69E-10 | 4,04E-08 | Serinc5  | 0,73 | Yes |
| ENSMUSG00000021704 | 2,44E-02  | 4,259948281  | 8,38E-02 | 7,72E-01 | 9,43E-01 | Mtx3     | 1,02 | No  |
| ENSMUSG00000021706 | 1,16E-01  | 4,73052773   | 2,27E+00 | 1,32E-01 | 4,56E-01 | Zfyve16  | 1,08 | No  |
| ENSMUSG00000021707 | 8,38E-02  | 4,094747734  | 9,27E-01 | 3,36E-01 | 6,37E-01 | Dhfr     | 1,06 | No  |
| ENSMUSG00000021708 | 5,34E-01  | 2,493930483  | 1,62E+01 | 5,59E-05 | 1,49E-03 | Rasgrf2  | 1,45 | Yes |
| ENSMUSG00000021709 | -5,84E-02 | 7,228027687  | 9,46E-01 | 3,31E-01 | 6,31E-01 | Erbin    | 0,96 | No  |
| ENSMUSG00000021710 | 1,69E-01  | 5,993000407  | 6,67E+00 | 9,83E-03 | 9,22E-02 | Nln      | 1,12 | No  |
| ENSMUSG00000021711 | 6,93E-02  | 5,046177996  | 8,93E-01 | 3,45E-01 | 6,46E-01 | Trappc13 | 1,05 | No  |
| ENSMUSG00000021712 | -1,07E-01 | 3,974304319  | 1,46E+00 | 2,26E-01 | 5,50E-01 | Trim23   | 0,93 | No  |
| ENSMUSG00000021713 | 2,01E-01  | 3,699550059  | 4,51E+00 | 3,37E-02 | 2,16E-01 | Ppwd1    | 1,15 | No  |
| ENSMUSG00000021714 | 1,05E-01  | 2,362059329  | 6,11E-01 | 4,34E-01 | 7,27E-01 | Cenpk    | 1,08 | No  |
| ENSMUSG00000021715 | 8,65E-03  | 3,118915867  | 6,20E-03 | 9,37E-01 | 1,00E+00 | Cwc27    | 1,01 | No  |

|                    |           |              |           |          |          |               |      |     |
|--------------------|-----------|--------------|-----------|----------|----------|---------------|------|-----|
| ENSMUSG00000021716 | 8,83E-02  | 4,032420782  | 1,01E+00  | 3,14E-01 | 6,14E-01 | Srek1ip1      | 1,06 | No  |
| ENSMUSG00000021718 | 7,02E-01  | -2,18562437  | 7,15E-01  | 3,98E-01 | 6,98E-01 | 4933425L06Rik | 1,63 | No  |
| ENSMUSG00000021719 | -9,37E-02 | 2,832804968  | 6,67E-01  | 4,14E-01 | 7,09E-01 | Rgs7bp        | 0,94 | No  |
| ENSMUSG00000021720 | 6,27E-02  | 4,467860321  | 6,08E-01  | 4,36E-01 | 7,28E-01 | Rnf180        | 1,04 | No  |
| ENSMUSG00000021725 | -8,46E-02 | 3,56621065   | 7,57E-01  | 3,84E-01 | 6,86E-01 | Parp8         | 0,94 | No  |
| ENSMUSG00000021728 | -1,02E-01 | 8,270951709  | 3,10E+00  | 7,85E-02 | 3,58E-01 | Emb           | 0,93 | No  |
| ENSMUSG00000021730 | 2,45E-01  | -1,655161291 | 1,39E-01  | 7,09E-01 | 9,09E-01 | Hcn1          | 1,19 | No  |
| ENSMUSG00000021731 | -4,36E-03 | 4,610722671  | 3,04E-03  | 9,56E-01 | 1,00E+00 | Mrps30        | 1,00 | No  |
| ENSMUSG00000021733 | 1,67E-03  | 6,642041638  | 7,18E-04  | 9,79E-01 | 1,00E+00 | Slc4a7        | 1,00 | No  |
| ENSMUSG00000021737 | -6,16E-02 | 6,135979262  | 9,10E-01  | 3,40E-01 | 6,41E-01 | Psm6          | 0,96 | No  |
| ENSMUSG00000021738 | -8,90E-02 | 5,516532798  | 1,68E+00  | 1,95E-01 | 5,50E-01 | Atxn7         | 0,94 | No  |
| ENSMUSG00000021741 | -1,77E-01 | 1,44391218   | 9,37E-01  | 3,33E-01 | 6,33E-01 | Gm5457        | 0,88 | No  |
| ENSMUSG00000021743 | -1,39E+00 | 0,593352511  | 3,74E+01  | 9,81E-10 | 8,05E-08 | Fezf2         | 0,38 | Yes |
| ENSMUSG00000021745 | -5,72E-01 | -2,831971956 | 2,57E-01  | 6,12E-01 | 8,52E-01 | Ptprg         | 0,67 | No  |
| ENSMUSG00000021747 | -7,19E-01 | -1,289362063 | 2,24E+00  | 1,34E-01 | 4,61E-01 | 4930452B06Rik | 0,61 | No  |
| ENSMUSG00000021748 | 1,05E-01  | 5,635048407  | 2,40E+00  | 1,21E-01 | 4,34E-01 | Pdhh          | 1,08 | No  |
| ENSMUSG00000021749 | -1,51E+00 | -2,355512635 | 2,37E+00  | 1,24E-01 | 4,40E-01 | Oit1          | 0,35 | No  |
| ENSMUSG00000021750 | 9,01E-03  | -3,107646452 | -5,16E-10 | 1,00E+00 | 1,00E+00 | Fam107a       | 1,01 | No  |
| ENSMUSG00000021751 | -1,33E+00 | -2,896104821 | 1,11E+00  | 2,92E-01 | 5,88E-01 | Acox2         | 0,40 | No  |
| ENSMUSG00000021752 | -2,52E-02 | 3,95280927   | 7,71E-02  | 7,81E-01 | 9,49E-01 | Kctd6         | 0,98 | No  |
| ENSMUSG00000021754 | -1,79E-01 | 6,512320299  | 8,24E+00  | 4,11E-03 | 4,82E-02 | Map3k1        | 0,88 | Yes |
| ENSMUSG00000021756 | -8,74E-02 | 7,809466845  | 2,23E+00  | 1,35E-01 | 4,63E-01 | Il6st         | 0,94 | No  |
| ENSMUSG00000021758 | 6,97E-01  | -1,01592621  | 2,19E+00  | 1,39E-01 | 4,70E-01 | Ddx4          | 1,62 | No  |
| ENSMUSG00000021759 | 1,74E-01  | 2,88241798   | 2,25E+00  | 1,34E-01 | 4,60E-01 | Plpp1         | 1,13 | No  |
| ENSMUSG00000021760 | -5,99E-02 | -2,49756396  | 3,28E-03  | 9,54E-01 | 1,00E+00 | Gpx8          | 0,96 | No  |
| ENSMUSG00000021763 | 2,15E+00  | -2,497602254 | 3,72E+00  | 5,39E-02 | 2,84E-01 | BC067074      | 4,45 | No  |
| ENSMUSG00000021764 | -7,06E-02 | 4,728503071  | 8,38E-01  | 3,60E-01 | 6,61E-01 | Ndufs4        | 0,95 | No  |
| ENSMUSG00000021765 | 2,77E-02  | 1,730576565  | 2,94E-02  | 8,64E-01 | 9,97E-01 | Fst           | 1,02 | No  |
| ENSMUSG00000021767 | -6,39E-02 | 4,506942908  | 6,18E-01  | 4,32E-01 | 7,25E-01 | Kat6b         | 0,96 | No  |
| ENSMUSG00000021768 | -1,13E-01 | 1,111346673  | 3,40E-01  | 5,60E-01 | 8,23E-01 | Dusp13        | 0,92 | No  |
| ENSMUSG00000021770 | 1,82E-01  | 6,331279535  | 8,15E+00  | 4,30E-03 | 4,99E-02 | Samd8         | 1,13 | Yes |
| ENSMUSG00000021771 | -3,02E-02 | 7,415375886  | 2,57E-01  | 6,12E-01 | 8,52E-01 | Vdac2         | 0,98 | No  |

|                    |           |              |          |          |          |               |      |     |
|--------------------|-----------|--------------|----------|----------|----------|---------------|------|-----|
| ENSMUSG00000021772 | -1,90E-02 | 4,467261099  | 5,54E-02 | 8,14E-01 | 9,68E-01 | Nkiras1       | 0,99 | No  |
| ENSMUSG00000021773 | 1,48E-01  | 3,786882926  | 2,53E+00 | 1,12E-01 | 4,11E-01 | Comtd1        | 1,11 | No  |
| ENSMUSG00000021774 | 3,51E-03  | 4,952782324  | 2,21E-03 | 9,62E-01 | 1,00E+00 | Ube2e1        | 1,00 | No  |
| ENSMUSG00000021775 | 3,36E-03  | 4,37797148   | 1,64E-03 | 9,68E-01 | 1,00E+00 | Nr1d2         | 1,00 | No  |
| ENSMUSG00000021779 | 3,97E-01  | 0,638436443  | 3,07E+00 | 7,96E-02 | 3,61E-01 | Thrb          | 1,32 | No  |
| ENSMUSG00000021782 | 4,31E-01  | -0,093725899 | 2,05E+00 | 1,52E-01 | 4,94E-01 | Dlg5          | 1,35 | No  |
| ENSMUSG00000021785 | -9,39E-02 | 4,897237345  | 1,57E+00 | 2,10E-01 | 5,50E-01 | Ngly1         | 0,94 | No  |
| ENSMUSG00000021786 | 1,59E-01  | 3,787678414  | 2,99E+00 | 8,37E-02 | 3,71E-01 | Oxsm          | 1,12 | No  |
| ENSMUSG00000021792 | 2,85E-01  | 3,292950833  | 7,23E+00 | 7,18E-03 | 7,32E-02 | Fam213a       | 1,22 | No  |
| ENSMUSG00000021794 | 6,07E-02  | 8,176600795  | 1,10E+00 | 2,94E-01 | 5,89E-01 | Glud1         | 1,04 | No  |
| ENSMUSG00000021796 | -1,50E-01 | 1,768031116  | 9,09E-01 | 3,40E-01 | 6,41E-01 | Bmpr1a        | 0,90 | No  |
| ENSMUSG00000021798 | 9,17E-01  | -1,832050441 | 2,14E+00 | 1,44E-01 | 4,79E-01 | Ldb3          | 1,89 | No  |
| ENSMUSG00000021803 | -4,38E-01 | -0,060911286 | 2,45E+00 | 1,18E-01 | 4,26E-01 | Cdhr1         | 0,74 | No  |
| ENSMUSG00000021804 | 1,81E+00  | -3,10765737  | 1,28E+00 | 2,58E-01 | 5,50E-01 | Rgr           | 3,49 | No  |
| ENSMUSG00000021806 | -2,23E-02 | 2,013270776  | 2,30E-02 | 8,79E-01 | 1,00E+00 | Nid2          | 0,98 | No  |
| ENSMUSG00000021807 | -3,09E-01 | 4,986023913  | 1,75E+01 | 2,93E-05 | 8,58E-04 | 2700060E02Rik | 0,81 | Yes |
| ENSMUSG00000021809 | 1,78E-02  | 3,444230868  | 3,18E-02 | 8,58E-01 | 9,94E-01 | Nudt13        | 1,01 | No  |
| ENSMUSG00000021810 | 6,33E-02  | 5,455064424  | 8,27E-01 | 3,63E-01 | 6,64E-01 | Ecd           | 1,04 | No  |
| ENSMUSG00000021811 | 8,98E-02  | 5,313081137  | 1,60E+00 | 2,06E-01 | 5,50E-01 | Dnajc9        | 1,06 | No  |
| ENSMUSG00000021814 | -6,59E-02 | 7,120883115  | 1,19E+00 | 2,75E-01 | 5,71E-01 | Anxa7         | 0,96 | No  |
| ENSMUSG00000021815 | 4,21E-01  | 0,375374419  | 2,99E+00 | 8,39E-02 | 3,71E-01 | Mss51         | 1,34 | No  |
| ENSMUSG00000021816 | 7,39E-02  | 5,79094346   | 1,23E+00 | 2,67E-01 | 5,63E-01 | Ppp3cb        | 1,05 | No  |
| ENSMUSG00000021819 | -3,54E-02 | 7,441421196  | 3,55E-01 | 5,51E-01 | 8,17E-01 | Zswim8        | 0,98 | No  |
| ENSMUSG00000021820 | 2,25E-02  | 6,247929179  | 1,25E-01 | 7,24E-01 | 9,17E-01 | Camk2g        | 1,02 | No  |
| ENSMUSG00000021822 | 2,84E-01  | 7,830975083  | 2,34E+01 | 1,35E-06 | 5,80E-05 | Plau          | 1,22 | Yes |
| ENSMUSG00000021823 | 1,29E-01  | 6,595939726  | 4,25E+00 | 3,92E-02 | 2,35E-01 | Vcl           | 1,09 | No  |
| ENSMUSG00000021824 | 1,51E-01  | 6,585464762  | 5,87E+00 | 1,54E-02 | 1,28E-01 | Ap3m1         | 1,11 | No  |
| ENSMUSG00000021830 | 2,42E-01  | 5,135657679  | 1,10E+01 | 9,29E-04 | 1,52E-02 | Txndc16       | 1,18 | Yes |
| ENSMUSG00000021831 | 1,62E-01  | 6,355786217  | 6,48E+00 | 1,09E-02 | 9,95E-02 | Ero1l         | 1,12 | No  |
| ENSMUSG00000021832 | 4,60E-02  | 5,251194242  | 4,14E-01 | 5,20E-01 | 7,99E-01 | Psmc6         | 1,03 | No  |
| ENSMUSG00000021835 | -1,89E+00 | -3,1076441   | 1,42E+00 | 2,33E-01 | 5,50E-01 | Bmp4          | 0,27 | No  |
| ENSMUSG00000021838 | -2,19E+00 | 0,393138045  | 5,91E+01 | 1,51E-14 | 2,21E-12 | Samd4         | 0,22 | Yes |

|                    |           |              |          |          |          |               |      |     |
|--------------------|-----------|--------------|----------|----------|----------|---------------|------|-----|
| ENSMUSG00000021840 | 8,86E-02  | 6,961721176  | 2,12E+00 | 1,45E-01 | 4,82E-01 | Mapk1ip1l     | 1,06 | No  |
| ENSMUSG00000021843 | -3,19E-01 | 5,277881451  | 2,03E+01 | 6,52E-06 | 2,28E-04 | Ktn1          | 0,80 | Yes |
| ENSMUSG00000021846 | 1,64E-01  | 6,349934336  | 6,59E+00 | 1,03E-02 | 9,52E-02 | Peli2         | 1,12 | No  |
| ENSMUSG00000021850 | -1,89E+00 | -3,1076441   | 1,42E+00 | 2,33E-01 | 5,50E-01 | 1700011H14Rik | 0,27 | No  |
| ENSMUSG00000021852 | -2,74E+00 | -3,033596063 | 2,99E+00 | 8,38E-02 | 3,71E-01 | Slc35f4       | 0,15 | No  |
| ENSMUSG00000021866 | -2,32E-02 | 5,588088433  | 1,15E-01 | 7,35E-01 | 9,24E-01 | Anxa11        | 0,98 | No  |
| ENSMUSG00000021867 | 1,36E-01  | 2,520161899  | 1,12E+00 | 2,89E-01 | 5,85E-01 | Tmem254b      | 1,10 | No  |
| ENSMUSG00000021868 | -2,91E-03 | 4,338058302  | 1,24E-03 | 9,72E-01 | 1,00E+00 | Ppif          | 1,00 | No  |
| ENSMUSG00000021870 | -6,99E-02 | 6,687536295  | 1,27E+00 | 2,59E-01 | 5,52E-01 | Slmap         | 0,95 | No  |
| ENSMUSG00000021871 | 6,56E-02  | 7,257541477  | 1,20E+00 | 2,74E-01 | 5,70E-01 | Pnp           | 1,05 | No  |
| ENSMUSG00000021872 | 1,84E+00  | -3,033649193 | 1,33E+00 | 2,49E-01 | 5,50E-01 | Rnase10       | 3,58 | No  |
| ENSMUSG00000021874 | 6,62E-02  | -1,740902571 | 1,07E-02 | 9,18E-01 | 1,00E+00 | 4933413J09Rik | 1,05 | No  |
| ENSMUSG00000021876 | 3,42E-01  | 4,602404568  | 1,80E+01 | 2,23E-05 | 6,84E-04 | Rnase4        | 1,27 | Yes |
| ENSMUSG00000021877 | -1,38E-01 | 7,149817224  | 5,24E+00 | 2,21E-02 | 1,61E-01 | Arf4          | 0,91 | No  |
| ENSMUSG00000021879 | -8,82E-01 | -2,963247103 | 4,30E-01 | 5,12E-01 | 7,95E-01 | Dnah12        | 0,54 | No  |
| ENSMUSG00000021880 | 1,72E-01  | 5,587648366  | 6,25E+00 | 1,24E-02 | 1,10E-01 | Rnase6        | 1,13 | No  |
| ENSMUSG00000021884 | 1,11E-01  | 2,052963408  | 5,39E-01 | 4,63E-01 | 7,52E-01 | Hacl1         | 1,08 | No  |
| ENSMUSG00000021886 | -5,17E-01 | 4,303039928  | 3,86E+01 | 5,28E-10 | 4,48E-08 | Gpr65         | 0,70 | Yes |
| ENSMUSG00000021890 | 6,08E-02  | 6,602510289  | 9,50E-01 | 3,30E-01 | 6,30E-01 | Eaf1          | 1,04 | No  |
| ENSMUSG00000021891 | 1,17E-01  | 4,296144398  | 1,98E+00 | 1,60E-01 | 5,07E-01 | Mettl6        | 1,08 | No  |
| ENSMUSG00000021892 | 6,50E-02  | 4,623887306  | 6,78E-01 | 4,10E-01 | 7,06E-01 | Sh3bp5        | 1,05 | No  |
| ENSMUSG00000021893 | -3,70E-02 | 6,183626994  | 3,32E-01 | 5,65E-01 | 8,27E-01 | Capn7         | 0,97 | No  |
| ENSMUSG00000021895 | -1,17E-01 | 5,33411163   | 2,77E+00 | 9,59E-02 | 3,87E-01 | Arhgef3       | 0,92 | No  |
| ENSMUSG00000021898 | -2,77E-01 | 0,062193991  | 9,52E-01 | 3,29E-01 | 6,30E-01 | Asb14         | 0,83 | No  |
| ENSMUSG00000021900 | 2,09E-01  | 3,940747942  | 5,30E+00 | 2,13E-02 | 1,57E-01 | Btd           | 1,16 | No  |
| ENSMUSG00000021901 | -5,40E-02 | 6,082988505  | 6,94E-01 | 4,05E-01 | 7,02E-01 | Bap1          | 0,96 | No  |
| ENSMUSG00000021902 | 1,42E-01  | 2,635677321  | 1,28E+00 | 2,58E-01 | 5,51E-01 | Phf7          | 1,10 | No  |
| ENSMUSG00000021903 | -6,87E-01 | -2,070090537 | 1,08E+00 | 3,00E-01 | 5,96E-01 | Galnt15       | 0,62 | No  |
| ENSMUSG00000021904 | -7,38E-02 | -3,033634644 | 2,66E-03 | 9,59E-01 | 1,00E+00 | Sema3g        | 0,95 | No  |
| ENSMUSG00000021905 | 3,59E-02  | 4,375959462  | 1,89E-01 | 6,64E-01 | 8,84E-01 | Dph3          | 1,03 | No  |
| ENSMUSG00000021906 | 6,01E-02  | 3,370001941  | 3,43E-01 | 5,58E-01 | 8,22E-01 | Oxnad1        | 1,04 | No  |
| ENSMUSG00000021907 | -1,94E+00 | -3,107619243 | 1,50E+00 | 2,21E-01 | 5,50E-01 | Msemb         | 0,26 | No  |

|                    |           |              |           |          |          |               |      |     |
|--------------------|-----------|--------------|-----------|----------|----------|---------------|------|-----|
| ENSMUSG00000021908 | -1,93E-01 | 6,70427897   | 9,84E+00  | 1,71E-03 | 2,46E-02 | Gm6768        | 0,87 | Yes |
| ENSMUSG00000021910 | -6,81E-02 | 8,377331249  | 1,40E+00  | 2,37E-01 | 5,50E-01 | Nisch         | 0,95 | No  |
| ENSMUSG00000021911 | 1,17E-01  | 5,203494581  | 2,64E+00  | 1,04E-01 | 3,97E-01 | Parg          | 1,08 | No  |
| ENSMUSG00000021913 | 6,73E-01  | 0,062262696  | 4,95E+00  | 2,61E-02 | 1,80E-01 | Ogdhl         | 1,59 | No  |
| ENSMUSG00000021916 | 2,12E-02  | 3,971999071  | 5,67E-02  | 8,12E-01 | 9,67E-01 | Glt8d1        | 1,01 | No  |
| ENSMUSG00000021917 | -4,69E-02 | 5,836859027  | 4,95E-01  | 4,82E-01 | 7,69E-01 | Spcs1         | 0,97 | No  |
| ENSMUSG00000021918 | 1,42E-01  | 3,275938067  | 1,83E+00  | 1,76E-01 | 5,35E-01 | Nek4          | 1,10 | No  |
| ENSMUSG00000021922 | 1,87E+00  | -2,83194184  | 1,36E+00  | 2,43E-01 | 5,50E-01 | Itih4         | 3,67 | No  |
| ENSMUSG00000021927 | -3,83E-03 | 1,302596849  | 3,95E-04  | 9,84E-01 | 1,00E+00 | Hnrnpa1l2-ps2 | 1,00 | No  |
| ENSMUSG00000021928 | 4,09E-02  | 3,537615881  | 1,72E-01  | 6,78E-01 | 8,92E-01 | Ebpl          | 1,03 | No  |
| ENSMUSG00000021929 | -4,23E-02 | 6,012358124  | 4,20E-01  | 5,17E-01 | 7,98E-01 | Kpna3         | 0,97 | No  |
| ENSMUSG00000021930 | 8,68E-02  | 3,903026622  | 9,00E-01  | 3,43E-01 | 6,43E-01 | Spryd7        | 1,06 | No  |
| ENSMUSG00000021932 | 7,93E-02  | 3,977098182  | 7,81E-01  | 3,77E-01 | 6,78E-01 | Rnaseh2b      | 1,06 | No  |
| ENSMUSG00000021933 | 1,25E+00  | -2,711729423 | 9,72E-01  | 3,24E-01 | 6,25E-01 | Gucy1b2       | 2,38 | No  |
| ENSMUSG00000021936 | 3,85E-02  | 3,970501916  | 1,85E-01  | 6,67E-01 | 8,86E-01 | Mapk8         | 1,03 | No  |
| ENSMUSG00000021938 | 5,55E-02  | 4,888219897  | 5,39E-01  | 4,63E-01 | 7,51E-01 | Pspc1         | 1,04 | No  |
| ENSMUSG00000021939 | 1,54E-01  | 11,73936746  | 7,61E+00  | 5,81E-03 | 6,26E-02 | Ctsb          | 1,11 | No  |
| ENSMUSG00000021940 | 9,01E-03  | -3,107646452 | -5,16E-10 | 1,00E+00 | 1,00E+00 | Ptpn20        | 1,01 | No  |
| ENSMUSG00000021944 | -1,87E+00 | -3,107637761 | 1,39E+00  | 2,38E-01 | 5,50E-01 | Gata4         | 0,27 | No  |
| ENSMUSG00000021945 | 9,89E-03  | 5,78185339   | 2,21E-02  | 8,82E-01 | 1,00E+00 | Zmym2         | 1,01 | No  |
| ENSMUSG00000021947 | 1,24E-01  | 4,715339466  | 2,53E+00  | 1,12E-01 | 4,10E-01 | Cryl1         | 1,09 | No  |
| ENSMUSG00000021948 | 6,40E-02  | 9,910191707  | 1,29E+00  | 2,56E-01 | 5,50E-01 | Prkcd         | 1,05 | No  |
| ENSMUSG00000021950 | 2,68E-01  | 0,144275053  | 9,89E-01  | 3,20E-01 | 6,21E-01 | Anxa8         | 1,20 | No  |
| ENSMUSG00000021951 | 1,38E-01  | 4,287434288  | 2,68E+00  | 1,02E-01 | 3,94E-01 | Eef1akmt1     | 1,10 | No  |
| ENSMUSG00000021952 | 4,65E-02  | 5,453973256  | 4,48E-01  | 5,03E-01 | 7,88E-01 | Xpo4          | 1,03 | No  |
| ENSMUSG00000021953 | -7,85E-01 | -1,175455494 | 3,22E+00  | 7,29E-02 | 3,43E-01 | Tdh           | 0,58 | No  |
| ENSMUSG00000021957 | 1,17E-01  | 9,08119094   | 4,21E+00  | 4,01E-02 | 2,38E-01 | Tkt           | 1,08 | No  |
| ENSMUSG00000021958 | 9,05E-02  | 3,204395805  | 7,19E-01  | 3,97E-01 | 6,97E-01 | Pinx1         | 1,06 | No  |
| ENSMUSG00000021959 | 1,96E-01  | 4,75278164   | 6,37E+00  | 1,16E-02 | 1,04E-01 | Lats2         | 1,15 | No  |
| ENSMUSG00000021962 | 4,90E-02  | 5,40657591   | 4,95E-01  | 4,81E-01 | 7,69E-01 | Dcp1a         | 1,03 | No  |
| ENSMUSG00000021963 | -3,30E-02 | 4,645259347  | 1,77E-01  | 6,74E-01 | 8,90E-01 | Sap18         | 0,98 | No  |
| ENSMUSG00000021965 | 2,04E-01  | 3,669435019  | 4,57E+00  | 3,26E-02 | 2,11E-01 | Ska3          | 1,15 | No  |



|                    |           |              |           |          |          |          |      |     |
|--------------------|-----------|--------------|-----------|----------|----------|----------|------|-----|
| ENSMUSG00000021966 | 3,11E+00  | -2,963280805 | 3,94E+00  | 4,72E-02 | 2,60E-01 | Prss52   | 8,63 | No  |
| ENSMUSG00000021967 | -1,01E-02 | 4,533975511  | 1,56E-02  | 9,01E-01 | 1,00E+00 | Mrpl57   | 0,99 | No  |
| ENSMUSG00000021969 | 4,83E-02  | 6,523101016  | 5,92E-01  | 4,42E-01 | 7,34E-01 | Zdhhc20  | 1,03 | No  |
| ENSMUSG00000021972 | 5,17E-02  | 6,072637784  | 6,35E-01  | 4,26E-01 | 7,20E-01 | Hmbox1   | 1,04 | No  |
| ENSMUSG00000021973 | -1,99E-02 | 5,643671144  | 8,61E-02  | 7,69E-01 | 9,42E-01 | Micu2    | 0,99 | No  |
| ENSMUSG00000021974 | -1,87E+00 | -3,107637761 | 1,39E+00  | 2,38E-01 | 5,50E-01 | Fgf9     | 0,27 | No  |
| ENSMUSG00000021975 | 5,66E-02  | 4,728755537  | 5,35E-01  | 4,64E-01 | 7,53E-01 | Ints9    | 1,04 | No  |
| ENSMUSG00000021978 | 2,46E-01  | 6,155961686  | 1,45E+01  | 1,42E-04 | 3,25E-03 | Extl3    | 1,19 | Yes |
| ENSMUSG00000021981 | -3,29E-02 | 5,596557637  | 2,33E-01  | 6,29E-01 | 8,62E-01 | Cab39l   | 0,98 | No  |
| ENSMUSG00000021982 | -3,43E-02 | 4,661471258  | 1,92E-01  | 6,61E-01 | 8,82E-01 | Cdadcl   | 0,98 | No  |
| ENSMUSG00000021983 | 1,10E+00  | -2,051805806 | 2,41E+00  | 1,21E-01 | 4,33E-01 | Atp8a2   | 2,14 | No  |
| ENSMUSG00000021986 | -1,34E+00 | -2,770595692 | 1,12E+00  | 2,90E-01 | 5,85E-01 | Amer2    | 0,40 | No  |
| ENSMUSG00000021987 | -6,25E-02 | 7,154191598  | 1,08E+00  | 2,98E-01 | 5,94E-01 | Mtmt6    | 0,96 | No  |
| ENSMUSG00000021990 | 3,84E-01  | 4,165823815  | 1,99E+01  | 7,96E-06 | 2,74E-04 | Spata13  | 1,30 | Yes |
| ENSMUSG00000021993 | -7,59E-02 | 3,07968151   | 4,67E-01  | 4,94E-01 | 7,80E-01 | Mipep    | 0,95 | No  |
| ENSMUSG00000021994 | -1,87E+00 | -3,033619006 | 1,41E+00  | 2,36E-01 | 5,50E-01 | Wnt5a    | 0,27 | No  |
| ENSMUSG00000021996 | 4,30E-02  | 6,359913808  | 4,56E-01  | 5,00E-01 | 7,85E-01 | Esd      | 1,03 | No  |
| ENSMUSG00000021997 | -1,24E-01 | -0,770767362 | 9,44E-02  | 7,59E-01 | 9,36E-01 | Lrrc63   | 0,92 | No  |
| ENSMUSG00000021998 | 1,13E-01  | 10,8413618   | 4,09E+00  | 4,31E-02 | 2,47E-01 | Lcp1     | 1,08 | No  |
| ENSMUSG00000021999 | -1,89E+00 | -3,1076441   | 1,42E+00  | 2,33E-01 | 5,50E-01 | Cpb2     | 0,27 | No  |
| ENSMUSG00000022000 | 4,37E-02  | 5,777383064  | 4,27E-01  | 5,14E-01 | 7,96E-01 | Zc3h13   | 1,03 | No  |
| ENSMUSG00000022002 | -3,83E-02 | -3,107651936 | -7,91E-11 | 1,00E+00 | 1,00E+00 | Erich6b  | 0,97 | No  |
| ENSMUSG00000022003 | 1,16E-01  | 3,945671811  | 1,69E+00  | 1,94E-01 | 5,50E-01 | Slc25a30 | 1,08 | No  |
| ENSMUSG00000022008 | -1,19E-01 | 5,980646795  | 3,28E+00  | 7,03E-02 | 3,35E-01 | Gpalpp1  | 0,92 | No  |
| ENSMUSG00000022009 | -1,29E-01 | 4,593223415  | 2,65E+00  | 1,04E-01 | 3,96E-01 | Nufip1   | 0,91 | No  |
| ENSMUSG00000022010 | -6,63E-03 | 4,925199176  | 7,93E-03  | 9,29E-01 | 1,00E+00 | Tsc22d1  | 1,00 | No  |
| ENSMUSG00000022012 | 4,42E-01  | -2,655163718 | 1,53E-01  | 6,96E-01 | 9,03E-01 | Enox1    | 1,36 | No  |
| ENSMUSG00000022013 | 8,42E-02  | 4,728170123  | 1,16E+00  | 2,81E-01 | 5,78E-01 | Dnajc15  | 1,06 | No  |
| ENSMUSG00000022014 | -5,41E-01 | 4,629449991  | 4,74E+01  | 5,80E-12 | 6,41E-10 | Epsti1   | 0,69 | Yes |
| ENSMUSG00000022015 | -1,36E+00 | -2,896086315 | 1,16E+00  | 2,81E-01 | 5,78E-01 | Tnfsf11  | 0,39 | No  |
| ENSMUSG00000022016 | 8,39E-02  | 5,865105442  | 1,60E+00  | 2,05E-01 | 5,50E-01 | Akap11   | 1,06 | No  |
| ENSMUSG00000022018 | 2,68E-02  | 2,896023024  | 5,21E-02  | 8,19E-01 | 9,71E-01 | Rgcc     | 1,02 | No  |

|                    |           |              |           |          |          |           |      |     |
|--------------------|-----------|--------------|-----------|----------|----------|-----------|------|-----|
| ENSMUSG00000022019 | 1,12E-01  | 4,045346913  | 1,60E+00  | 2,06E-01 | 5,50E-01 | Tdrd3     | 1,08 | No  |
| ENSMUSG00000022020 | 1,18E-01  | 4,002699446  | 1,78E+00  | 1,83E-01 | 5,45E-01 | Naa16     | 1,09 | No  |
| ENSMUSG00000022021 | 1,21E-01  | 4,568972512  | 2,31E+00  | 1,29E-01 | 4,50E-01 | Diaph3    | 1,09 | No  |
| ENSMUSG00000022022 | -1,60E-01 | 2,073044794  | 1,14E+00  | 2,85E-01 | 5,82E-01 | Mtrf1     | 0,90 | No  |
| ENSMUSG00000022023 | -8,49E-02 | 4,880390198  | 1,28E+00  | 2,58E-01 | 5,51E-01 | Wbp4      | 0,94 | No  |
| ENSMUSG00000022024 | -3,39E-01 | 5,052081771  | 2,13E+01  | 3,97E-06 | 1,49E-04 | Sugt1     | 0,79 | Yes |
| ENSMUSG00000022026 | -9,85E-01 | -2,548226909 | 8,50E-01  | 3,57E-01 | 6,58E-01 | Olfm4     | 0,51 | No  |
| ENSMUSG00000022031 | -7,16E-02 | 4,154885126  | 6,91E-01  | 4,06E-01 | 7,02E-01 | Elp3      | 0,95 | No  |
| ENSMUSG00000022032 | 7,78E-01  | -2,963243536 | 3,33E-01  | 5,64E-01 | 8,26E-01 | Scara5    | 1,71 | No  |
| ENSMUSG00000022033 | 1,50E-01  | 3,382029676  | 2,12E+00  | 1,46E-01 | 4,83E-01 | Pbk       | 1,11 | No  |
| ENSMUSG00000022034 | 4,23E-01  | 4,379848256  | 2,62E+01  | 3,06E-07 | 1,53E-05 | Esco2     | 1,34 | Yes |
| ENSMUSG00000022035 | -4,26E-02 | 4,883634565  | 3,22E-01  | 5,71E-01 | 8,31E-01 | Ccdc25    | 0,97 | No  |
| ENSMUSG00000022037 | -1,07E-01 | 5,010646409  | 2,14E+00  | 1,43E-01 | 4,78E-01 | Clu       | 0,93 | No  |
| ENSMUSG00000022039 | -2,49E-01 | -1,561092416 | 1,84E-01  | 6,68E-01 | 8,86E-01 | Adam2     | 0,84 | No  |
| ENSMUSG00000022040 | -8,28E-01 | -1,24700863  | 3,10E+00  | 7,81E-02 | 3,57E-01 | Ephx2     | 0,56 | No  |
| ENSMUSG00000022041 | -1,51E-01 | 1,028735163  | 5,04E-01  | 4,78E-01 | 7,65E-01 | Chrna2    | 0,90 | No  |
| ENSMUSG00000022043 | -1,56E-01 | 7,289247438  | 6,85E+00  | 8,85E-03 | 8,54E-02 | Trim35    | 0,90 | No  |
| ENSMUSG00000022044 | 8,52E-01  | -2,548198116 | 8,73E-01  | 3,50E-01 | 6,51E-01 | Stmn4     | 1,81 | No  |
| ENSMUSG00000022048 | -3,90E-02 | 4,987551103  | 2,76E-01  | 6,00E-01 | 8,46E-01 | Dpysl2    | 0,97 | No  |
| ENSMUSG00000022051 | 6,18E-02  | 6,747251934  | 1,00E+00  | 3,16E-01 | 6,17E-01 | Bnip3l    | 1,04 | No  |
| ENSMUSG00000022052 | 1,30E-01  | 4,973838082  | 3,07E+00  | 8,00E-02 | 3,62E-01 | Ppp2r2a   | 1,09 | No  |
| ENSMUSG00000022054 | -5,27E+00 | -2,311154008 | 1,98E+01  | 8,61E-06 | 2,94E-04 | Nefm      | 0,03 | Yes |
| ENSMUSG00000022057 | 2,74E-02  | -3,033621357 | 9,16E-12  | 1,00E+00 | 1,00E+00 | Adamdec1  | 1,02 | No  |
| ENSMUSG00000022061 | -3,83E-02 | -3,107651936 | -7,91E-11 | 1,00E+00 | 1,00E+00 | Nkx3-1    | 0,97 | No  |
| ENSMUSG00000022064 | 3,53E-04  | 3,153127641  | 1,05E-05  | 9,97E-01 | 1,00E+00 | Pibf1     | 1,00 | No  |
| ENSMUSG00000022066 | 4,77E-02  | 4,019179485  | 2,88E-01  | 5,92E-01 | 8,42E-01 | Entpd4b   | 1,03 | No  |
| ENSMUSG00000022070 | 1,75E-01  | 4,326196693  | 4,45E+00  | 3,49E-02 | 2,21E-01 | Bora      | 1,13 | No  |
| ENSMUSG00000022074 | 3,43E-02  | 3,565607418  | 1,27E-01  | 7,22E-01 | 9,16E-01 | Tnfrsf10b | 1,02 | No  |
| ENSMUSG00000022075 | 3,30E-01  | 3,976247417  | 1,41E+01  | 1,69E-04 | 3,77E-03 | Rhobtb2   | 1,26 | Yes |
| ENSMUSG00000022085 | -2,73E-02 | -2,963256629 | 3,40E-04  | 9,85E-01 | 1,00E+00 | Pebp4     | 0,98 | No  |
| ENSMUSG00000022089 | 1,05E-01  | 5,882038243  | 2,52E+00  | 1,13E-01 | 4,13E-01 | Bin3      | 1,08 | No  |
| ENSMUSG00000022090 | 1,96E-01  | 4,462096274  | 5,81E+00  | 1,59E-02 | 1,31E-01 | Pdlim2    | 1,15 | No  |

|                    |           |              |          |          |          |          |      |     |
|--------------------|-----------|--------------|----------|----------|----------|----------|------|-----|
| ENSMUSG00000022091 | 1,38E-01  | 3,020718014  | 1,43E+00 | 2,32E-01 | 5,50E-01 | Sorbs3   | 1,10 | No  |
| ENSMUSG00000022092 | -2,43E-01 | 3,246644752  | 5,37E+00 | 2,05E-02 | 1,54E-01 | Ppp3cc   | 0,85 | No  |
| ENSMUSG00000022094 | 5,17E-02  | 5,62164284   | 5,69E-01 | 4,51E-01 | 7,41E-01 | Slc39a14 | 1,04 | No  |
| ENSMUSG00000022095 | 9,26E-02  | 5,638258793  | 1,86E+00 | 1,72E-01 | 5,29E-01 | Fam160b2 | 1,07 | No  |
| ENSMUSG00000022096 | 1,53E-01  | 7,413648758  | 6,62E+00 | 1,01E-02 | 9,38E-02 | Hr       | 1,11 | No  |
| ENSMUSG00000022097 | 1,87E+00  | -3,107639691 | 1,38E+00 | 2,40E-01 | 5,50E-01 | Sftpc    | 3,67 | No  |
| ENSMUSG00000022098 | -8,99E-01 | 2,519734573  | 4,97E+01 | 1,83E-12 | 2,15E-10 | Bmp1     | 0,54 | Yes |
| ENSMUSG00000022099 | -2,53E-01 | 0,12021982   | 8,30E-01 | 3,62E-01 | 6,64E-01 | Dmtn     | 0,84 | No  |
| ENSMUSG00000022100 | 4,02E-02  | 6,081037141  | 3,83E-01 | 5,36E-01 | 8,08E-01 | Xpo7     | 1,03 | No  |
| ENSMUSG00000022102 | 2,07E-01  | 8,240201448  | 1,28E+01 | 3,55E-04 | 6,94E-03 | Dok2     | 1,15 | Yes |
| ENSMUSG00000022103 | 5,67E-01  | 5,513892092  | 6,64E+01 | 3,59E-16 | 6,12E-14 | Gfra2    | 1,48 | Yes |
| ENSMUSG00000022105 | -2,97E-02 | 6,286810499  | 2,18E-01 | 6,41E-01 | 8,70E-01 | Rb1      | 0,98 | No  |
| ENSMUSG00000022106 | -2,30E-01 | 6,834808431  | 1,41E+01 | 1,77E-04 | 3,93E-03 | Rcbtb2   | 0,85 | Yes |
| ENSMUSG00000022108 | -1,01E-01 | 9,467465659  | 3,17E+00 | 7,48E-02 | 3,48E-01 | Itm2b    | 0,93 | No  |
| ENSMUSG00000022109 | 8,21E-02  | 3,7224197    | 7,60E-01 | 3,83E-01 | 6,85E-01 | Med4     | 1,06 | No  |
| ENSMUSG00000022110 | -5,51E-02 | 5,37149275   | 6,13E-01 | 4,34E-01 | 7,27E-01 | Sucla2   | 0,96 | No  |
| ENSMUSG00000022111 | 9,51E-02  | 1,957125238  | 3,98E-01 | 5,28E-01 | 8,04E-01 | Uchl3    | 1,07 | No  |
| ENSMUSG00000022114 | -1,56E-01 | 0,490258219  | 3,84E-01 | 5,35E-01 | 8,08E-01 | Spry2    | 0,90 | No  |
| ENSMUSG00000022119 | -9,02E-03 | 5,75738544   | 1,81E-02 | 8,93E-01 | 1,00E+00 | Rbm26    | 0,99 | No  |
| ENSMUSG00000022120 | -2,09E-01 | 3,534078244  | 4,86E+00 | 2,75E-02 | 1,87E-01 | Rnf219   | 0,87 | No  |
| ENSMUSG00000022122 | -4,23E-01 | -0,785606923 | 1,04E+00 | 3,08E-01 | 6,06E-01 | Ednrb    | 0,75 | No  |
| ENSMUSG00000022123 | 4,61E-01  | 2,641460819  | 1,36E+01 | 2,28E-04 | 4,84E-03 | Scel     | 1,38 | Yes |
| ENSMUSG00000022124 | 2,67E-02  | 6,349041869  | 1,77E-01 | 6,74E-01 | 8,90E-01 | Fbxl3    | 1,02 | No  |
| ENSMUSG00000022125 | 4,26E-02  | 6,957895994  | 4,89E-01 | 4,84E-01 | 7,72E-01 | Cln5     | 1,03 | No  |
| ENSMUSG00000022126 | -5,37E-01 | 5,517198002  | 6,00E+01 | 9,35E-15 | 1,39E-12 | Acod1    | 0,69 | Yes |
| ENSMUSG00000022130 | 1,39E-02  | 3,240110169  | 1,73E-02 | 8,95E-01 | 1,00E+00 | Tgds     | 1,01 | No  |
| ENSMUSG00000022131 | 3,34E-01  | 3,891974041  | 1,33E+01 | 2,66E-04 | 5,49E-03 | Gpr180   | 1,26 | Yes |
| ENSMUSG00000022132 | -6,77E-01 | 1,136263924  | 1,17E+01 | 6,19E-04 | 1,10E-02 | Cldn10   | 0,63 | Yes |
| ENSMUSG00000022136 | 8,67E-02  | 7,176391674  | 2,08E+00 | 1,50E-01 | 4,91E-01 | Dnajc3   | 1,06 | No  |
| ENSMUSG00000022139 | 1,80E-01  | 6,793601618  | 8,51E+00 | 3,53E-03 | 4,32E-02 | Mbnl2    | 1,13 | Yes |
| ENSMUSG00000022141 | -6,21E-02 | 7,067745222  | 1,05E+00 | 3,05E-01 | 6,02E-01 | Nipbl    | 0,96 | No  |
| ENSMUSG00000022142 | 1,30E-01  | 5,411955492  | 3,47E+00 | 6,25E-02 | 3,11E-01 | Nup155   | 1,09 | No  |

|                    |           |              |           |          |          |               |      |     |
|--------------------|-----------|--------------|-----------|----------|----------|---------------|------|-----|
| ENSMUSG00000022144 | -1,04E-02 | -2,963271219 | -1,18E-10 | 1,00E+00 | 1,00E+00 | Gdnf          | 0,99 | No  |
| ENSMUSG00000022146 | -4,35E-01 | -2,033548944 | 3,47E-01  | 5,56E-01 | 8,21E-01 | Osmr          | 0,74 | No  |
| ENSMUSG00000022148 | -1,32E-02 | 5,54522335   | 3,63E-02  | 8,49E-01 | 9,88E-01 | Fyb           | 0,99 | No  |
| ENSMUSG00000022149 | -1,94E+00 | -3,107619243 | 1,50E+00  | 2,21E-01 | 5,50E-01 | C9            | 0,26 | No  |
| ENSMUSG00000022150 | 4,17E-01  | 9,131216393  | 5,34E+01  | 2,77E-13 | 3,65E-11 | Dab2          | 1,34 | Yes |
| ENSMUSG00000022151 | 7,84E-03  | 4,71049445   | 1,04E-02  | 9,19E-01 | 1,00E+00 | Ttc33         | 1,01 | No  |
| ENSMUSG00000022157 | -7,25E-01 | -2,333151573 | 5,89E-01  | 4,43E-01 | 7,34E-01 | Mcpt8         | 0,61 | No  |
| ENSMUSG00000022159 | 1,53E-02  | 2,450256296  | 1,36E-02  | 9,07E-01 | 1,00E+00 | Rab2b         | 1,01 | No  |
| ENSMUSG00000022160 | 1,70E-01  | 4,584759079  | 4,62E+00  | 3,16E-02 | 2,06E-01 | Mettl3        | 1,13 | No  |
| ENSMUSG00000022174 | 8,34E-02  | 6,204565773  | 1,68E+00  | 1,95E-01 | 5,50E-01 | Dad1          | 1,06 | No  |
| ENSMUSG00000022175 | -3,15E-03 | 7,836603484  | 2,90E-03  | 9,57E-01 | 1,00E+00 | Lrp10         | 1,00 | No  |
| ENSMUSG00000022176 | 1,61E-01  | -2,355620036 | 3,87E-02  | 8,44E-01 | 9,86E-01 | Rem2          | 1,12 | No  |
| ENSMUSG00000022177 | 1,25E-01  | 4,429655732  | 2,36E+00  | 1,24E-01 | 4,41E-01 | Haus4         | 1,09 | No  |
| ENSMUSG00000022178 | 1,74E-01  | 1,028181282  | 7,40E-01  | 3,90E-01 | 6,90E-01 | Ajuba         | 1,13 | No  |
| ENSMUSG00000022179 | 2,82E-01  | 2,055513429  | 3,67E+00  | 5,54E-02 | 2,88E-01 | 4931414P19Rik | 1,22 | No  |
| ENSMUSG00000022180 | 1,42E-01  | 6,341350542  | 5,00E+00  | 2,54E-02 | 1,77E-01 | Slc7a8        | 1,10 | No  |
| ENSMUSG00000022181 | 3,14E-02  | -3,107617333 | -7,69E-10 | 1,00E+00 | 1,00E+00 | C6            | 1,02 | No  |
| ENSMUSG00000022184 | 1,19E-02  | 3,609404236  | 1,56E-02  | 9,01E-01 | 1,00E+00 | Fbxo4         | 1,01 | No  |
| ENSMUSG00000022185 | -2,56E-02 | 7,506786253  | 1,87E-01  | 6,66E-01 | 8,85E-01 | Acin1         | 0,98 | No  |
| ENSMUSG00000022186 | 1,59E-01  | 7,865449798  | 7,42E+00  | 6,44E-03 | 6,76E-02 | Oxct1         | 1,12 | No  |
| ENSMUSG00000022191 | 1,07E-01  | 4,198069827  | 1,57E+00  | 2,11E-01 | 5,50E-01 | Drosha        | 1,08 | No  |
| ENSMUSG00000022193 | -8,43E-02 | 5,839746457  | 1,60E+00  | 2,06E-01 | 5,50E-01 | Psmb5         | 0,94 | No  |
| ENSMUSG00000022194 | -1,11E-01 | 5,369668191  | 2,52E+00  | 1,13E-01 | 4,13E-01 | Pabpn1        | 0,93 | No  |
| ENSMUSG00000022195 | -9,60E-03 | 4,736710118  | 1,56E-02  | 9,01E-01 | 1,00E+00 | 6030458C11Rik | 0,99 | No  |
| ENSMUSG00000022197 | 4,38E-01  | 0,167909936  | 2,30E+00  | 1,29E-01 | 4,51E-01 | Pdzd2         | 1,36 | No  |
| ENSMUSG00000022199 | -5,88E-01 | 0,379380635  | 5,10E+00  | 2,39E-02 | 1,70E-01 | Slc22a17      | 0,67 | No  |
| ENSMUSG00000022200 | -4,13E-02 | 6,839257178  | 4,54E-01  | 5,01E-01 | 7,86E-01 | Golph3        | 0,97 | No  |
| ENSMUSG00000022201 | -3,53E-02 | 6,722887729  | 3,28E-01  | 5,67E-01 | 8,29E-01 | Zfr           | 0,98 | No  |
| ENSMUSG00000022203 | -1,89E+00 | -3,1076441   | 1,42E+00  | 2,33E-01 | 5,50E-01 | Efs           | 0,27 | No  |
| ENSMUSG00000022204 | -5,51E-02 | 4,501905625  | 4,67E-01  | 4,95E-01 | 7,80E-01 | Ngdn          | 0,96 | No  |
| ENSMUSG00000022205 | -2,00E-01 | 6,617305167  | 1,03E+01  | 1,31E-03 | 2,01E-02 | Sub1          | 0,87 | Yes |
| ENSMUSG00000022206 | 7,31E-01  | -2,963267542 | 2,91E-01  | 5,90E-01 | 8,41E-01 | Npr3          | 1,66 | No  |

|                    |           |              |           |          |          |          |      |     |
|--------------------|-----------|--------------|-----------|----------|----------|----------|------|-----|
| ENSMUSG00000022208 | -5,69E-02 | -2,711704538 | 2,92E-03  | 9,57E-01 | 1,00E+00 | Jph4     | 0,96 | No  |
| ENSMUSG00000022210 | -2,58E-02 | 3,561611107  | 7,11E-02  | 7,90E-01 | 9,54E-01 | Dhrs4    | 0,98 | No  |
| ENSMUSG00000022211 | -9,44E-01 | 0,266739925  | 1,18E+01  | 5,81E-04 | 1,04E-02 | Carmil3  | 0,52 | Yes |
| ENSMUSG00000022212 | -2,95E-01 | 0,489890553  | 1,37E+00  | 2,41E-01 | 5,50E-01 | Cpne6    | 0,81 | No  |
| ENSMUSG00000022214 | -1,46E-01 | 6,236880353  | 5,21E+00  | 2,24E-02 | 1,63E-01 | Dcaf11   | 0,90 | No  |
| ENSMUSG00000022215 | -3,19E+00 | -2,770600616 | 4,28E+00  | 3,86E-02 | 2,33E-01 | Fitm1    | 0,11 | No  |
| ENSMUSG00000022216 | -2,60E-01 | 5,628825974  | 1,47E+01  | 1,26E-04 | 2,95E-03 | Psme1    | 0,83 | Yes |
| ENSMUSG00000022217 | -1,05E-02 | 2,775049158  | 7,80E-03  | 9,30E-01 | 1,00E+00 | Emc9     | 0,99 | No  |
| ENSMUSG00000022218 | 3,35E-01  | 2,693453868  | 7,25E+00  | 7,10E-03 | 7,26E-02 | Tgm1     | 1,26 | No  |
| ENSMUSG00000022219 | -1,21E-02 | 1,620436009  | 5,06E-03  | 9,43E-01 | 1,00E+00 | Cideb    | 0,99 | No  |
| ENSMUSG00000022220 | 7,16E-01  | 0,910692812  | 1,01E+01  | 1,49E-03 | 2,22E-02 | Adcy4    | 1,64 | Yes |
| ENSMUSG00000022221 | 6,12E-02  | 5,932264235  | 8,55E-01  | 3,55E-01 | 6,56E-01 | Ripk3    | 1,04 | No  |
| ENSMUSG00000022223 | -1,02E-01 | 4,635021487  | 1,71E+00  | 1,91E-01 | 5,50E-01 | Sdr39u1  | 0,93 | No  |
| ENSMUSG00000022225 | -3,83E-02 | -3,107651936 | -7,91E-11 | 1,00E+00 | 1,00E+00 | Cma1     | 0,97 | No  |
| ENSMUSG00000022226 | -1,94E+00 | -3,107619243 | 1,50E+00  | 2,21E-01 | 5,50E-01 | Mcpt2    | 0,26 | No  |
| ENSMUSG00000022227 | -6,05E-02 | -1,831980854 | 8,52E-03  | 9,26E-01 | 1,00E+00 | Mcpt1    | 0,96 | No  |
| ENSMUSG00000022228 | 2,25E-01  | 5,365599102  | 1,05E+01  | 1,22E-03 | 1,91E-02 | Zscan26  | 1,17 | Yes |
| ENSMUSG00000022229 | 9,01E-03  | -3,107646452 | -5,16E-10 | 1,00E+00 | 1,00E+00 | Atp12a   | 1,01 | No  |
| ENSMUSG00000022231 | -1,87E+00 | -3,033619006 | 1,41E+00  | 2,36E-01 | 5,50E-01 | Sema5a   | 0,27 | No  |
| ENSMUSG00000022234 | -3,93E-03 | 7,549001015  | 4,42E-03  | 9,47E-01 | 1,00E+00 | Cct5     | 1,00 | No  |
| ENSMUSG00000022235 | 1,65E-01  | -1,268178903 | 1,10E-01  | 7,40E-01 | 9,26E-01 | Cmb1     | 1,12 | No  |
| ENSMUSG00000022236 | 2,15E-01  | 1,489784287  | 1,47E+00  | 2,26E-01 | 5,50E-01 | Ropn1l   | 1,16 | No  |
| ENSMUSG00000022237 | -8,94E-01 | 5,067293571  | 1,49E+02  | 2,74E-34 | 2,05E-31 | Ankrd33b | 0,54 | Yes |
| ENSMUSG00000022240 | 5,08E-01  | 3,178346106  | 2,12E+01  | 4,13E-06 | 1,54E-04 | Ctnnd2   | 1,42 | Yes |
| ENSMUSG00000022241 | 8,48E-02  | 5,528555207  | 1,51E+00  | 2,19E-01 | 5,50E-01 | Tars     | 1,06 | No  |
| ENSMUSG00000022244 | 8,25E-02  | 2,32050073   | 3,62E-01  | 5,47E-01 | 8,15E-01 | Amacr    | 1,06 | No  |
| ENSMUSG00000022245 | 1,26E+00  | -2,770589435 | 9,81E-01  | 3,22E-01 | 6,22E-01 | Skor1    | 2,39 | No  |
| ENSMUSG00000022246 | -1,44E-01 | 6,332810321  | 5,20E+00  | 2,26E-02 | 1,64E-01 | Rai14    | 0,90 | No  |
| ENSMUSG00000022247 | 1,42E-01  | 4,482600249  | 3,08E+00  | 7,91E-02 | 3,60E-01 | Brix1    | 1,10 | No  |
| ENSMUSG00000022248 | 2,68E-02  | 2,672072267  | 4,87E-02  | 8,25E-01 | 9,74E-01 | Rad1     | 1,02 | No  |
| ENSMUSG00000022249 | 2,61E+00  | -3,033672762 | 2,63E+00  | 1,05E-01 | 3,97E-01 | Ttc23l   | 6,10 | No  |
| ENSMUSG00000022253 | 6,97E-02  | 3,446105735  | 4,76E-01  | 4,90E-01 | 7,76E-01 | Nadk2    | 1,05 | No  |

|                    |           |              |          |          |          |          |      |     |
|--------------------|-----------|--------------|----------|----------|----------|----------|------|-----|
| ENSMUSG00000022255 | 8,63E-02  | 7,397461225  | 2,10E+00 | 1,47E-01 | 4,86E-01 | Mtdh     | 1,06 | No  |
| ENSMUSG00000022257 | -1,92E-01 | 3,222268311  | 3,25E+00 | 7,15E-02 | 3,39E-01 | Laptn4b  | 0,88 | No  |
| ENSMUSG00000022261 | -4,61E-01 | 0,438915315  | 3,59E+00 | 5,82E-02 | 2,98E-01 | Sdc2     | 0,73 | No  |
| ENSMUSG00000022262 | 1,85E+00  | -3,107657832 | 1,35E+00 | 2,46E-01 | 5,50E-01 | Dnah5    | 3,61 | No  |
| ENSMUSG00000022263 | 1,79E-01  | 7,53940142   | 9,18E+00 | 2,45E-03 | 3,29E-02 | Trio     | 1,13 | Yes |
| ENSMUSG00000022265 | -1,10E-02 | 6,42452409   | 3,02E-02 | 8,62E-01 | 9,96E-01 | Ank      | 0,99 | No  |
| ENSMUSG00000022270 | -7,99E-02 | 5,913069478  | 1,46E+00 | 2,27E-01 | 5,50E-01 | Retreg1  | 0,95 | No  |
| ENSMUSG00000022272 | -1,37E-01 | 4,807122385  | 3,27E+00 | 7,06E-02 | 3,36E-01 | Myo10    | 0,91 | No  |
| ENSMUSG00000022280 | 7,50E-02  | 5,188819886  | 1,09E+00 | 2,97E-01 | 5,93E-01 | Rnf19a   | 1,05 | No  |
| ENSMUSG00000022283 | -1,23E-01 | 8,817055091  | 4,62E+00 | 3,16E-02 | 2,06E-01 | Pabpc1   | 0,92 | No  |
| ENSMUSG00000022285 | 7,42E-02  | 8,490837918  | 1,67E+00 | 1,96E-01 | 5,50E-01 | Ywhaz    | 1,05 | No  |
| ENSMUSG00000022286 | -3,78E-01 | 0,438973076  | 2,44E+00 | 1,18E-01 | 4,27E-01 | Grhl2    | 0,77 | No  |
| ENSMUSG00000022292 | 2,50E-01  | 3,864255025  | 7,43E+00 | 6,41E-03 | 6,74E-02 | Rrm2b    | 1,19 | No  |
| ENSMUSG00000022295 | 1,02E-01  | 6,52124699   | 2,66E+00 | 1,03E-01 | 3,95E-01 | Atp6v1c1 | 1,07 | No  |
| ENSMUSG00000022296 | -4,74E-02 | -2,896161048 | 1,45E-03 | 9,70E-01 | 1,00E+00 | Baalc    | 0,97 | No  |
| ENSMUSG00000022297 | 2,32E-02  | -0,311164403 | 5,41E-03 | 9,41E-01 | 1,00E+00 | Fzd6     | 1,02 | No  |
| ENSMUSG00000022299 | 1,64E-01  | 3,851514678  | 3,15E+00 | 7,61E-02 | 3,52E-01 | Slc25a32 | 1,12 | No  |
| ENSMUSG00000022300 | -1,99E-02 | 4,85769795   | 6,90E-02 | 7,93E-01 | 9,56E-01 | Dcaf13   | 0,99 | No  |
| ENSMUSG00000022303 | 3,78E-01  | 8,053666369  | 4,21E+01 | 8,75E-11 | 8,37E-09 | Dcstamp  | 1,30 | Yes |
| ENSMUSG00000022304 | 4,90E-01  | 2,058814193  | 1,01E+01 | 1,49E-03 | 2,22E-02 | Dpys     | 1,40 | Yes |
| ENSMUSG00000022305 | 1,49E-01  | 8,402867433  | 6,66E+00 | 9,85E-03 | 9,22E-02 | Lrp12    | 1,11 | No  |
| ENSMUSG00000022306 | 1,01E+00  | -1,146242688 | 5,11E+00 | 2,38E-02 | 1,69E-01 | Zfpm2    | 2,01 | No  |
| ENSMUSG00000022307 | 1,79E-01  | 5,800363744  | 7,14E+00 | 7,54E-03 | 7,58E-02 | Oxr1     | 1,13 | No  |
| ENSMUSG00000022309 | -3,53E+00 | -2,896127731 | 5,59E+00 | 1,81E-02 | 1,41E-01 | Angpt1   | 0,09 | No  |
| ENSMUSG00000022312 | -1,57E-01 | 6,624084012  | 6,40E+00 | 1,14E-02 | 1,03E-01 | Eif3h    | 0,90 | No  |
| ENSMUSG00000022313 | 5,36E-02  | 3,755197926  | 3,27E-01 | 5,68E-01 | 8,29E-01 | Utp23    | 1,04 | No  |
| ENSMUSG00000022314 | 5,53E-02  | 7,472361562  | 8,68E-01 | 3,51E-01 | 6,53E-01 | Rad21    | 1,04 | No  |
| ENSMUSG00000022321 | -6,88E-02 | -2,896163841 | 2,08E-03 | 9,64E-01 | 1,00E+00 | Cdh10    | 0,95 | No  |
| ENSMUSG00000022322 | 2,69E-01  | 4,446618099  | 1,08E+01 | 9,89E-04 | 1,60E-02 | Shcbp1   | 1,20 | Yes |
| ENSMUSG00000022323 | -4,70E-01 | 2,398220392  | 1,25E+01 | 4,09E-04 | 7,76E-03 | Rida     | 0,72 | Yes |
| ENSMUSG00000022324 | 4,45E-01  | 0,44815869   | 3,18E+00 | 7,46E-02 | 3,47E-01 | Matn2    | 1,36 | No  |
| ENSMUSG00000022325 | 1,21E-01  | 3,960663029  | 1,84E+00 | 1,75E-01 | 5,33E-01 | Pop1     | 1,09 | No  |

|                    |           |              |           |          |          |         |      |     |
|--------------------|-----------|--------------|-----------|----------|----------|---------|------|-----|
| ENSMUSG00000022329 | -4,82E-03 | 4,42893325   | 3,51E-03  | 9,53E-01 | 1,00E+00 | Stk3    | 1,00 | No  |
| ENSMUSG00000022330 | -3,83E-02 | -3,107651936 | -7,91E-11 | 1,00E+00 | 1,00E+00 | Osr2    | 0,97 | No  |
| ENSMUSG00000022332 | 4,85E-02  | 0,045434322  | 3,15E-02  | 8,59E-01 | 9,95E-01 | Khdrbs3 | 1,03 | No  |
| ENSMUSG00000022335 | 6,66E-02  | 3,312150751  | 4,10E-01  | 5,22E-01 | 8,00E-01 | Zfat    | 1,05 | No  |
| ENSMUSG00000022336 | -1,60E-01 | 5,04615325   | 4,77E+00  | 2,89E-02 | 1,93E-01 | Eif3e   | 0,89 | No  |
| ENSMUSG00000022337 | 3,98E-02  | 4,436300483  | 2,42E-01  | 6,23E-01 | 8,58E-01 | Emc2    | 1,03 | No  |
| ENSMUSG00000022338 | -2,52E-02 | 3,136467383  | 5,34E-02  | 8,17E-01 | 9,70E-01 | Eny2    | 0,98 | No  |
| ENSMUSG00000022339 | 6,49E-02  | 3,474997999  | 4,19E-01  | 5,17E-01 | 7,98E-01 | Ebag9   | 1,05 | No  |
| ENSMUSG00000022340 | 9,01E-03  | -3,107646452 | -5,16E-10 | 1,00E+00 | 1,00E+00 | Sybu    | 1,01 | No  |
| ENSMUSG00000022342 | -1,89E+00 | -3,1076441   | 1,42E+00  | 2,33E-01 | 5,50E-01 | Kcnv1   | 0,27 | No  |
| ENSMUSG00000022346 | 2,35E-01  | 5,354159367  | 1,08E+01  | 9,95E-04 | 1,61E-02 | Myc     | 1,18 | Yes |
| ENSMUSG00000022350 | 1,29E-01  | 6,831037438  | 4,43E+00  | 3,52E-02 | 2,22E-01 | Washc5  | 1,09 | No  |
| ENSMUSG00000022351 | 2,78E-01  | 6,741175561  | 2,02E+01  | 6,87E-06 | 2,39E-04 | Sqle    | 1,21 | Yes |
| ENSMUSG00000022353 | 2,15E-01  | 7,663777266  | 1,33E+01  | 2,69E-04 | 5,55E-03 | Mtss1   | 1,16 | Yes |
| ENSMUSG00000022354 | -5,20E-02 | 5,999436918  | 6,30E-01  | 4,27E-01 | 7,21E-01 | Ndufb9  | 0,96 | No  |
| ENSMUSG00000022357 | -5,52E-02 | -2,497608827 | 3,83E-03  | 9,51E-01 | 1,00E+00 | Klhl38  | 0,96 | No  |
| ENSMUSG00000022358 | -2,67E-01 | 4,110879775  | 9,67E+00  | 1,87E-03 | 2,66E-02 | Fbxo32  | 0,83 | Yes |
| ENSMUSG00000022359 | -9,53E-02 | 3,141240542  | 7,71E-01  | 3,80E-01 | 6,81E-01 | Wdyh1   | 0,94 | No  |
| ENSMUSG00000022360 | 2,61E-01  | 6,626082175  | 1,75E+01  | 2,86E-05 | 8,42E-04 | Atad2   | 1,20 | Yes |
| ENSMUSG00000022361 | 1,04E-01  | 6,2194527    | 2,63E+00  | 1,05E-01 | 3,97E-01 | Zhx1    | 1,07 | No  |
| ENSMUSG00000022362 | 1,43E-02  | 3,881043918  | 2,48E-02  | 8,75E-01 | 1,00E+00 | Gm29394 | 1,01 | No  |
| ENSMUSG00000022364 | 8,44E-02  | 4,690346433  | 1,18E+00  | 2,78E-01 | 5,74E-01 | Tbc1d31 | 1,06 | No  |
| ENSMUSG00000022365 | 1,19E-01  | 6,948214815  | 3,83E+00  | 5,02E-02 | 2,72E-01 | Derl1   | 1,09 | No  |
| ENSMUSG00000022367 | -3,18E+00 | -2,831933991 | 4,25E+00  | 3,92E-02 | 2,35E-01 | Has2    | 0,11 | No  |
| ENSMUSG00000022369 | 3,08E-02  | 3,677295214  | 1,05E-01  | 7,45E-01 | 9,29E-01 | Mtbp    | 1,02 | No  |
| ENSMUSG00000022370 | -2,19E-01 | 4,407898887  | 7,24E+00  | 7,12E-03 | 7,28E-02 | Mrpl13  | 0,86 | No  |
| ENSMUSG00000022371 | -1,55E+00 | -1,548057585 | 8,22E+00  | 4,14E-03 | 4,85E-02 | Col14a1 | 0,34 | Yes |
| ENSMUSG00000022372 | 4,07E-01  | 7,60363827   | 4,71E+01  | 6,67E-12 | 7,29E-10 | Sla     | 1,33 | Yes |
| ENSMUSG00000022376 | -1,89E+00 | -3,1076441   | 1,42E+00  | 2,33E-01 | 5,50E-01 | Adcy8   | 0,27 | No  |
| ENSMUSG00000022377 | -1,38E-01 | 8,051794539  | 5,64E+00  | 1,76E-02 | 1,39E-01 | Asap1   | 0,91 | No  |
| ENSMUSG00000022378 | 1,02E-02  | 6,916443296  | 2,77E-02  | 8,68E-01 | 1,00E+00 | Fam49b  | 1,01 | No  |
| ENSMUSG00000022385 | 2,29E-01  | 5,038691955  | 9,70E+00  | 1,84E-03 | 2,62E-02 | Gtse1   | 1,17 | Yes |

|                    |           |              |          |          |          |          |      |     |
|--------------------|-----------|--------------|----------|----------|----------|----------|------|-----|
| ENSMUSG00000022386 | -1,39E-01 | 2,516491914  | 1,18E+00 | 2,77E-01 | 5,74E-01 | Trmu     | 0,91 | No  |
| ENSMUSG00000022387 | 7,27E-02  | 6,486411831  | 1,34E+00 | 2,47E-01 | 5,50E-01 | Brd1     | 1,05 | No  |
| ENSMUSG00000022388 | -7,88E-02 | -2,89616692  | 4,36E-03 | 9,47E-01 | 1,00E+00 | Ttl8     | 0,95 | No  |
| ENSMUSG00000022389 | -3,53E-02 | 5,571586054  | 2,68E-01 | 6,05E-01 | 8,49E-01 | Tef      | 0,98 | No  |
| ENSMUSG00000022390 | -2,45E-01 | 5,93408118   | 1,39E+01 | 1,93E-04 | 4,23E-03 | Zc3h7b   | 0,84 | Yes |
| ENSMUSG00000022391 | 5,94E-02  | 6,828517907  | 9,37E-01 | 3,33E-01 | 6,33E-01 | Rangap1  | 1,04 | No  |
| ENSMUSG00000022394 | 1,95E-01  | 4,749703448  | 6,41E+00 | 1,13E-02 | 1,02E-01 | L3mbtl2  | 1,14 | No  |
| ENSMUSG00000022400 | -8,39E-03 | 3,968964427  | 8,84E-03 | 9,25E-01 | 1,00E+00 | Rbx1     | 0,99 | No  |
| ENSMUSG00000022401 | 1,87E-01  | 3,956609372  | 4,37E+00 | 3,65E-02 | 2,27E-01 | Xpnpep3  | 1,14 | No  |
| ENSMUSG00000022403 | -4,29E-02 | 6,953424645  | 4,97E-01 | 4,81E-01 | 7,69E-01 | St13     | 0,97 | No  |
| ENSMUSG00000022404 | -3,28E-02 | 5,009705833  | 1,98E-01 | 6,56E-01 | 8,80E-01 | Slc25a17 | 0,98 | No  |
| ENSMUSG00000022407 | 6,09E-02  | 4,938799469  | 6,62E-01 | 4,16E-01 | 7,11E-01 | Adsl     | 1,04 | No  |
| ENSMUSG00000022408 | 2,17E-01  | 0,251855884  | 6,16E-01 | 4,32E-01 | 7,26E-01 | Fam83f   | 1,16 | No  |
| ENSMUSG00000022412 | -4,30E-02 | 5,340798433  | 3,74E-01 | 5,41E-01 | 8,11E-01 | Mief1    | 0,97 | No  |
| ENSMUSG00000022414 | 3,21E-01  | 4,482558401  | 1,60E+01 | 6,43E-05 | 1,68E-03 | Tab1     | 1,25 | Yes |
| ENSMUSG00000022415 | 1,66E-01  | 4,14521705   | 3,58E+00 | 5,85E-02 | 2,99E-01 | Syngn1   | 1,12 | No  |
| ENSMUSG00000022416 | 7,43E-01  | -2,896145754 | 3,01E-01 | 5,83E-01 | 8,38E-01 | Cacna1i  | 1,67 | No  |
| ENSMUSG00000022419 | 3,03E-01  | 5,688000797  | 1,98E+01 | 8,63E-06 | 2,94E-04 | Deptor   | 1,23 | Yes |
| ENSMUSG00000022420 | 1,10E-01  | 3,984733301  | 1,52E+00 | 2,18E-01 | 5,50E-01 | Dnal4    | 1,08 | No  |
| ENSMUSG00000022421 | 3,74E-01  | 2,00153437   | 6,22E+00 | 1,26E-02 | 1,11E-01 | Nptxr    | 1,30 | No  |
| ENSMUSG00000022422 | 6,20E-02  | 2,128036919  | 1,96E-01 | 6,58E-01 | 8,81E-01 | Dscc1    | 1,04 | No  |
| ENSMUSG00000022425 | -8,33E-01 | -0,770548994 | 4,63E+00 | 3,15E-02 | 2,06E-01 | Enpp2    | 0,56 | No  |
| ENSMUSG00000022426 | -8,90E-02 | 5,942250464  | 1,85E+00 | 1,74E-01 | 5,32E-01 | Josd1    | 0,94 | No  |
| ENSMUSG00000022427 | 1,96E-02  | 6,146359331  | 9,20E-02 | 7,62E-01 | 9,38E-01 | Tomm22   | 1,01 | No  |
| ENSMUSG00000022428 | 2,18E-01  | 3,208433918  | 4,00E+00 | 4,55E-02 | 2,54E-01 | Cby1     | 1,16 | No  |
| ENSMUSG00000022429 | -1,16E+00 | -2,448691686 | 1,74E+00 | 1,87E-01 | 5,50E-01 | Dmc1     | 0,45 | No  |
| ENSMUSG00000022431 | 1,85E+00  | -3,107657832 | 1,35E+00 | 2,46E-01 | 5,50E-01 | Ribc2    | 3,61 | No  |
| ENSMUSG00000022432 | -1,14E+00 | -2,070028454 | 2,57E+00 | 1,09E-01 | 4,05E-01 | Smc1b    | 0,45 | No  |
| ENSMUSG00000022433 | -4,30E-02 | 5,365324113  | 3,71E-01 | 5,43E-01 | 8,12E-01 | Csnk1e   | 0,97 | No  |
| ENSMUSG00000022434 | -1,45E-01 | 4,673174876  | 3,51E+00 | 6,09E-02 | 3,06E-01 | Fam118a  | 0,90 | No  |
| ENSMUSG00000022436 | -2,48E-01 | 6,969024222  | 1,68E+01 | 4,24E-05 | 1,18E-03 | Sh3bp1   | 0,84 | Yes |
| ENSMUSG00000022437 | 1,43E-02  | 5,561127562  | 4,34E-02 | 8,35E-01 | 9,80E-01 | Samm50   | 1,01 | No  |



|                    |           |              |          |          |          |          |       |      |     |
|--------------------|-----------|--------------|----------|----------|----------|----------|-------|------|-----|
| ENSMUSG00000022438 | 3,12E-01  | 5,313564165  | 1,91E+01 | 1,22E-05 | 3,99E-04 | Parvb    |       | 1,24 | Yes |
| ENSMUSG00000022439 | 9,64E-02  | 7,207866453  | 2,57E+00 | 1,09E-01 | 4,04E-01 | Parvg    |       | 1,07 | No  |
| ENSMUSG00000022440 | -1,65E-01 | 4,89950445   | 4,84E+00 | 2,78E-02 | 1,88E-01 | C1qtnf6  |       | 0,89 | No  |
| ENSMUSG00000022441 | -3,52E-01 | -0,015809018 | 1,47E+00 | 2,25E-01 | 5,50E-01 | Efcab6   |       | 0,78 | No  |
| ENSMUSG00000022442 | 1,82E-02  | 2,820825669  | 2,28E-02 | 8,80E-01 | 1,00E+00 | Ttll1    |       | 1,01 | No  |
| ENSMUSG00000022443 | -1,52E-01 | 10,72925814  | 7,33E+00 | 6,79E-03 | 7,03E-02 | Myh9     |       | 0,90 | No  |
| ENSMUSG00000022445 | -3,23E-01 | -2,401352556 | 1,56E-01 | 6,92E-01 | 9,01E-01 | Cyp2d26  |       | 0,80 | No  |
| ENSMUSG00000022449 | -1,87E+00 | -3,107637761 | 1,39E+00 | 2,38E-01 | 5,50E-01 | Adamts20 |       | 0,27 | No  |
| ENSMUSG00000022450 | 2,71E-02  | 5,686389252  | 1,61E-01 | 6,88E-01 | 8,98E-01 | Ndufa6   |       | 1,02 | No  |
| ENSMUSG00000022451 | -3,88E-02 | 6,333817159  | 3,71E-01 | 5,43E-01 | 8,12E-01 | Twf1     |       | 0,97 | No  |
| ENSMUSG00000022452 | 3,99E-02  | 6,74114433   | 4,17E-01 | 5,19E-01 | 7,98E-01 | Smdt1    |       | 1,03 | No  |
| ENSMUSG00000022453 | 2,16E-01  | 7,79389645   | 1,35E+01 | 2,40E-04 | 5,06E-03 | Naga     |       | 1,16 | Yes |
| ENSMUSG00000022455 | -8,56E-01 | -2,832005432 | 4,01E-01 | 5,26E-01 | 8,03E-01 | Wbp2nl   |       | 0,55 | No  |
| ENSMUSG00000022456 | 6,49E-01  | 6,015130372  | 9,41E+01 | 3,01E-22 | 8,67E-20 |          | 37865 | 1,57 | Yes |
| ENSMUSG00000022462 | 1,73E-01  | 6,902746444  | 8,11E+00 | 4,40E-03 | 5,07E-02 | Slc38a2  |       | 1,13 | No  |
| ENSMUSG00000022463 | 1,44E-01  | 8,355395456  | 6,20E+00 | 1,28E-02 | 1,12E-01 | Srebf2   |       | 1,10 | No  |
| ENSMUSG00000022464 | 2,64E+00  | -2,963240788 | 2,69E+00 | 1,01E-01 | 3,92E-01 | Slc38a4  |       | 6,24 | No  |
| ENSMUSG00000022466 | 1,60E-02  | 3,008768117  | 2,01E-02 | 8,87E-01 | 1,00E+00 | Rpap3    |       | 1,01 | No  |
| ENSMUSG00000022469 | 1,63E-01  | -2,522620202 | 2,57E-02 | 8,73E-01 | 1,00E+00 | Rapgef3  |       | 1,12 | No  |
| ENSMUSG00000022471 | 1,17E-01  | 4,157131133  | 1,83E+00 | 1,76E-01 | 5,35E-01 | Xrcc6    |       | 1,08 | No  |
| ENSMUSG00000022472 | -2,21E-02 | 4,664772088  | 8,04E-02 | 7,77E-01 | 9,46E-01 | Desi1    |       | 0,98 | No  |
| ENSMUSG00000022474 | -2,70E-01 | 3,802923828  | 8,62E+00 | 3,33E-03 | 4,14E-02 | Pmm1     |       | 0,83 | Yes |
| ENSMUSG00000022475 | 4,71E-02  | 3,306488418  | 2,05E-01 | 6,51E-01 | 8,76E-01 | Hdac7    |       | 1,03 | No  |
| ENSMUSG00000022476 | 6,01E-03  | 3,827215129  | 4,26E-03 | 9,48E-01 | 1,00E+00 | Polr3h   |       | 1,00 | No  |
| ENSMUSG00000022477 | -3,60E-02 | 7,134783508  | 3,57E-01 | 5,50E-01 | 8,17E-01 | Aco2     |       | 0,98 | No  |
| ENSMUSG00000022479 | -3,60E-01 | 6,937256627  | 3,52E+01 | 3,01E-09 | 2,29E-07 | Vdr      |       | 0,78 | Yes |
| ENSMUSG00000022483 | 4,32E-01  | -2,655193999 | 1,45E-01 | 7,03E-01 | 9,06E-01 | Col2a1   |       | 1,35 | No  |
| ENSMUSG00000022484 | -1,89E+00 | -3,1076441   | 1,42E+00 | 2,33E-01 | 5,50E-01 | Hoxc10   |       | 0,27 | No  |
| ENSMUSG00000022487 | -6,83E-02 | -2,896110758 | 2,05E-03 | 9,64E-01 | 1,00E+00 | Gtsf1    |       | 0,95 | No  |
| ENSMUSG00000022488 | -2,19E-01 | 9,535813722  | 1,51E+01 | 1,04E-04 | 2,50E-03 | Nckap1l  |       | 0,86 | Yes |
| ENSMUSG00000022489 | -1,82E-01 | 6,393516275  | 8,34E+00 | 3,88E-03 | 4,62E-02 | Pde1b    |       | 0,88 | Yes |
| ENSMUSG00000022490 | -1,19E-01 | 2,195526838  | 6,76E-01 | 4,11E-01 | 7,07E-01 | Ppp1r1a  |       | 0,92 | No  |

|                    |           |              |          |          |          |               |      |     |
|--------------------|-----------|--------------|----------|----------|----------|---------------|------|-----|
| ENSMUSG00000022491 | -7,76E-02 | -2,963273445 | 2,73E-03 | 9,58E-01 | 1,00E+00 | Glycam1       | 0,95 | No  |
| ENSMUSG00000022494 | -2,94E-01 | -2,268118813 | 1,50E-01 | 6,98E-01 | 9,04E-01 | Shisa9        | 0,82 | No  |
| ENSMUSG00000022496 | -1,98E-02 | -3,033655952 | 2,83E-11 | 1,00E+00 | 1,00E+00 | Tnfrsf17      | 0,99 | No  |
| ENSMUSG00000022498 | 7,45E-02  | 5,816161867  | 1,25E+00 | 2,64E-01 | 5,59E-01 | Txndc11       | 1,05 | No  |
| ENSMUSG00000022500 | 8,67E-02  | 9,370336841  | 2,34E+00 | 1,26E-01 | 4,44E-01 | Litaf         | 1,06 | No  |
| ENSMUSG00000022501 | -1,10E+00 | -2,424839297 | 1,92E+00 | 1,66E-01 | 5,18E-01 | Prm1          | 0,47 | No  |
| ENSMUSG00000022503 | -4,45E-02 | 5,168509209  | 3,80E-01 | 5,38E-01 | 8,09E-01 | Nubp1         | 0,97 | No  |
| ENSMUSG00000022504 | 2,02E-01  | 8,306824415  | 1,22E+01 | 4,68E-04 | 8,69E-03 | Ciita         | 1,15 | Yes |
| ENSMUSG00000022505 | 9,96E-02  | 5,266714463  | 1,95E+00 | 1,62E-01 | 5,12E-01 | Emp2          | 1,07 | No  |
| ENSMUSG00000022507 | -2,99E-02 | 5,800324424  | 2,01E-01 | 6,54E-01 | 8,79E-01 | 1810013L24Rik | 0,98 | No  |
| ENSMUSG00000022508 | 1,54E-01  | 6,015548     | 5,55E+00 | 1,85E-02 | 1,44E-01 | Bcl6          | 1,11 | No  |
| ENSMUSG00000022510 | -1,89E+00 | -3,1076441   | 1,42E+00 | 2,33E-01 | 5,50E-01 | Trp63         | 0,27 | No  |
| ENSMUSG00000022512 | 2,30E-01  | 6,694984488  | 1,38E+01 | 2,06E-04 | 4,45E-03 | Cldn1         | 1,17 | Yes |
| ENSMUSG00000022514 | 2,05E-01  | 5,042947999  | 7,57E+00 | 5,94E-03 | 6,37E-02 | Il1rap        | 1,15 | No  |
| ENSMUSG00000022515 | 2,33E-01  | 5,200524397  | 1,07E+01 | 1,09E-03 | 1,74E-02 | Anks3         | 1,18 | Yes |
| ENSMUSG00000022516 | -1,99E-01 | 4,818601019  | 6,87E+00 | 8,79E-03 | 8,49E-02 | Nudt16l1      | 0,87 | No  |
| ENSMUSG00000022517 | 1,00E-01  | 6,492597739  | 2,54E+00 | 1,11E-01 | 4,10E-01 | Mgrn1         | 1,07 | No  |
| ENSMUSG00000022518 | 3,74E-01  | 0,206592838  | 1,87E+00 | 1,72E-01 | 5,28E-01 | 4930562C15Rik | 1,30 | No  |
| ENSMUSG00000022519 | 1,18E-01  | 1,405892715  | 4,34E-01 | 5,10E-01 | 7,93E-01 | Srl           | 1,08 | No  |
| ENSMUSG00000022521 | -1,70E-01 | 6,279144491  | 7,06E+00 | 7,86E-03 | 7,80E-02 | Crebbp        | 0,89 | No  |
| ENSMUSG00000022523 | 1,85E+00  | -3,107657832 | 1,35E+00 | 2,46E-01 | 5,50E-01 | Fgf12         | 3,61 | No  |
| ENSMUSG00000022526 | 1,92E-01  | 3,272447146  | 3,51E+00 | 6,11E-02 | 3,07E-01 | Zfp251        | 1,14 | No  |
| ENSMUSG00000022528 | -3,60E-01 | -2,185503636 | 1,63E-01 | 6,87E-01 | 8,97E-01 | Hes1          | 0,78 | No  |
| ENSMUSG00000022529 | -1,07E-01 | 5,878010544  | 2,64E+00 | 1,04E-01 | 3,97E-01 | Zfp263        | 0,93 | No  |
| ENSMUSG00000022533 | 7,56E-02  | 7,991800621  | 1,69E+00 | 1,94E-01 | 5,50E-01 | Atp13a3       | 1,05 | No  |
| ENSMUSG00000022534 | -3,46E-01 | 1,711404013  | 4,49E+00 | 3,41E-02 | 2,17E-01 | Mefv          | 0,79 | No  |
| ENSMUSG00000022536 | -6,63E-02 | 7,456791306  | 1,25E+00 | 2,63E-01 | 5,58E-01 | Glyr1         | 0,96 | No  |
| ENSMUSG00000022537 | -1,73E+00 | -2,548213078 | 2,08E+00 | 1,49E-01 | 4,90E-01 | Tmem44        | 0,30 | No  |
| ENSMUSG00000022538 | 6,79E-02  | 5,145808722  | 8,74E-01 | 3,50E-01 | 6,51E-01 | Lsg1          | 1,05 | No  |
| ENSMUSG00000022540 | -5,39E-01 | 7,073226583  | 7,97E+01 | 4,30E-19 | 9,27E-17 | Rogdi         | 0,69 | Yes |
| ENSMUSG00000022543 | 7,74E-02  | -0,669029766 | 4,12E-02 | 8,39E-01 | 9,83E-01 | 4930451G09Rik | 1,06 | No  |
| ENSMUSG00000022544 | 2,87E-01  | 4,144306861  | 1,11E+01 | 8,74E-04 | 1,45E-02 | Eef2kmt       | 1,22 | Yes |

|                    |           |              |          |          |          |         |      |     |
|--------------------|-----------|--------------|----------|----------|----------|---------|------|-----|
| ENSMUSG00000022545 | 4,60E-02  | 4,800430611  | 3,62E-01 | 5,47E-01 | 8,15E-01 | Ercc4   | 1,03 | No  |
| ENSMUSG00000022546 | 1,24E-01  | 1,901542298  | 6,79E-01 | 4,10E-01 | 7,06E-01 | Gpt     | 1,09 | No  |
| ENSMUSG00000022548 | -8,37E-01 | -2,832007507 | 3,84E-01 | 5,35E-01 | 8,08E-01 | Apod    | 0,56 | No  |
| ENSMUSG00000022550 | 1,01E-02  | 3,315337903  | 9,52E-03 | 9,22E-01 | 1,00E+00 | Adck5   | 1,01 | No  |
| ENSMUSG00000022551 | 2,44E-02  | 6,720660278  | 1,56E-01 | 6,93E-01 | 9,01E-01 | Cyc1    | 1,02 | No  |
| ENSMUSG00000022552 | -8,03E-02 | 5,818528915  | 1,45E+00 | 2,28E-01 | 5,50E-01 | Sharpin | 0,95 | No  |
| ENSMUSG00000022553 | -5,43E-02 | 5,958242832  | 6,83E-01 | 4,09E-01 | 7,05E-01 | Maf1    | 0,96 | No  |
| ENSMUSG00000022554 | 1,54E-01  | 2,649414589  | 1,57E+00 | 2,10E-01 | 5,50E-01 | Hgh1    | 1,11 | No  |
| ENSMUSG00000022555 | -1,60E-01 | 3,892540622  | 3,15E+00 | 7,59E-02 | 3,51E-01 | Dgat1   | 0,90 | No  |
| ENSMUSG00000022556 | 1,56E-01  | 4,684101145  | 4,01E+00 | 4,53E-02 | 2,54E-01 | Hsf1    | 1,11 | No  |
| ENSMUSG00000022557 | 7,56E-04  | 5,454502856  | 1,19E-04 | 9,91E-01 | 1,00E+00 | Bop1    | 1,00 | No  |
| ENSMUSG00000022558 | 1,55E-01  | 7,293747375  | 6,71E+00 | 9,60E-03 | 9,04E-02 | Mroh1   | 1,11 | No  |
| ENSMUSG00000022559 | 2,59E-02  | 4,766808206  | 1,14E-01 | 7,36E-01 | 9,24E-01 | Fbxl6   | 1,02 | No  |
| ENSMUSG00000022560 | 5,36E-02  | 4,258015285  | 4,02E-01 | 5,26E-01 | 8,03E-01 | Slc52a2 | 1,04 | No  |
| ENSMUSG00000022561 | 6,72E-02  | 5,534445042  | 9,50E-01 | 3,30E-01 | 6,30E-01 | Gpaa1   | 1,05 | No  |
| ENSMUSG00000022562 | -3,40E-01 | 2,130915124  | 5,49E+00 | 1,91E-02 | 1,47E-01 | Oplah   | 0,79 | No  |
| ENSMUSG00000022564 | -2,08E-02 | 7,230925674  | 1,20E-01 | 7,29E-01 | 9,20E-01 | Grina   | 0,99 | No  |
| ENSMUSG00000022565 | 2,98E-01  | 8,873308599  | 2,72E+01 | 1,85E-07 | 9,69E-06 | Plec    | 1,23 | Yes |
| ENSMUSG00000022568 | 7,35E-02  | 5,729159617  | 1,18E+00 | 2,76E-01 | 5,73E-01 | Scrib   | 1,05 | No  |
| ENSMUSG00000022570 | -1,73E-01 | 4,799022511  | 5,13E+00 | 2,35E-02 | 1,68E-01 | Tsta3   | 0,89 | No  |
| ENSMUSG00000022571 | 5,64E-02  | 3,989914955  | 4,00E-01 | 5,27E-01 | 8,04E-01 | Pycl    | 1,04 | No  |
| ENSMUSG00000022574 | -7,58E-01 | 1,545705693  | 2,09E+01 | 4,75E-06 | 1,72E-04 | Naprt   | 0,59 | Yes |
| ENSMUSG00000022575 | -2,55E-01 | 6,863986235  | 1,73E+01 | 3,16E-05 | 9,16E-04 | Gsdmd   | 0,84 | Yes |
| ENSMUSG00000022580 | -8,79E-01 | -0,27869004  | 7,07E+00 | 7,85E-03 | 7,79E-02 | Rhpn1   | 0,54 | No  |
| ENSMUSG00000022582 | 8,56E-01  | -2,770602728 | 6,41E-01 | 4,23E-01 | 7,18E-01 | Ly6g    | 1,81 | No  |
| ENSMUSG00000022584 | 2,35E-01  | 4,584460483  | 8,61E+00 | 3,34E-03 | 4,15E-02 | Ly6c2   | 1,18 | Yes |
| ENSMUSG00000022586 | -8,79E-01 | 1,89984329   | 3,01E+01 | 4,20E-08 | 2,55E-06 | Ly6i    | 0,54 | Yes |
| ENSMUSG00000022587 | 3,21E-02  | 9,041925488  | 3,18E-01 | 5,73E-01 | 8,32E-01 | Ly6e    | 1,02 | No  |
| ENSMUSG00000022591 | -5,88E-02 | -3,033634602 | 1,62E-03 | 9,68E-01 | 1,00E+00 | Gm9747  | 0,96 | No  |
| ENSMUSG00000022594 | 1,35E-01  | 0,661338301  | 3,14E-01 | 5,75E-01 | 8,34E-01 | Lynx1   | 1,10 | No  |
| ENSMUSG00000022596 | -8,09E-02 | -3,107638307 | 2,93E-03 | 9,57E-01 | 1,00E+00 | Slurp1  | 0,95 | No  |
| ENSMUSG00000022598 | -1,36E+00 | -2,185623112 | 2,55E+00 | 1,10E-01 | 4,07E-01 | Psca    | 0,39 | No  |

|                    |           |              |          |          |          |          |      |     |
|--------------------|-----------|--------------|----------|----------|----------|----------|------|-----|
| ENSMUSG00000022601 | 9,21E-02  | 4,632193038  | 1,38E+00 | 2,39E-01 | 5,50E-01 | Zbtb11   | 1,07 | No  |
| ENSMUSG00000022602 | -4,86E-01 | 4,454285181  | 3,77E+01 | 8,38E-10 | 6,94E-08 | Arc      | 0,71 | Yes |
| ENSMUSG00000022604 | 2,14E-01  | 1,950530153  | 2,10E+00 | 1,48E-01 | 4,87E-01 | Cep97    | 1,16 | No  |
| ENSMUSG00000022607 | -1,82E-01 | 4,205889512  | 4,65E+00 | 3,11E-02 | 2,04E-01 | Ptk2     | 0,88 | No  |
| ENSMUSG00000022610 | 6,85E-01  | -2,896150766 | 2,55E-01 | 6,14E-01 | 8,53E-01 | Mapk12   | 1,61 | No  |
| ENSMUSG00000022614 | 8,38E-02  | 5,766981651  | 1,55E+00 | 2,13E-01 | 5,50E-01 | Lmf2     | 1,06 | No  |
| ENSMUSG00000022615 | 2,11E-01  | 3,25358337   | 3,92E+00 | 4,77E-02 | 2,62E-01 | Tymp     | 1,16 | No  |
| ENSMUSG00000022617 | 4,68E-02  | 5,322597379  | 4,35E-01 | 5,10E-01 | 7,93E-01 | Chkb     | 1,03 | No  |
| ENSMUSG00000022619 | -7,69E-02 | -2,963220349 | 2,69E-03 | 9,59E-01 | 1,00E+00 | Mapk8ip2 | 0,95 | No  |
| ENSMUSG00000022620 | 6,32E-02  | 5,665806318  | 8,69E-01 | 3,51E-01 | 6,53E-01 | Arsa     | 1,04 | No  |
| ENSMUSG00000022621 | 1,40E-01  | 1,920316311  | 8,20E-01 | 3,65E-01 | 6,66E-01 | Rabl2    | 1,10 | No  |
| ENSMUSG00000022623 | 7,66E-01  | -2,963249872 | 3,22E-01 | 5,70E-01 | 8,31E-01 | Shank3   | 1,70 | No  |
| ENSMUSG00000022629 | 9,60E-02  | -0,711772159 | 5,69E-02 | 8,12E-01 | 9,67E-01 | Kif21a   | 1,07 | No  |
| ENSMUSG00000022634 | -1,00E-01 | 4,391466232  | 1,47E+00 | 2,25E-01 | 5,50E-01 | Yaf2     | 0,93 | No  |
| ENSMUSG00000022635 | -1,49E-01 | 4,858967897  | 3,94E+00 | 4,73E-02 | 2,60E-01 | Zcrb1    | 0,90 | No  |
| ENSMUSG00000022636 | 2,82E-01  | 7,699005901  | 2,29E+01 | 1,72E-06 | 7,17E-05 | Alcam    | 1,22 | Yes |
| ENSMUSG00000022637 | -3,60E-01 | 5,781506485  | 2,93E+01 | 6,25E-08 | 3,65E-06 | Cblb     | 0,78 | Yes |
| ENSMUSG00000022639 | 2,67E-01  | 5,171997506  | 1,38E+01 | 2,04E-04 | 4,43E-03 | Dubr     | 1,20 | Yes |
| ENSMUSG00000022641 | 2,32E-02  | 5,250029624  | 1,06E-01 | 7,45E-01 | 9,29E-01 | Bbx      | 1,02 | No  |
| ENSMUSG00000022650 | -1,94E+00 | -3,107619243 | 1,50E+00 | 2,21E-01 | 5,50E-01 | Retnlb   | 0,26 | No  |
| ENSMUSG00000022651 | -3,18E+00 | -2,770591119 | 4,25E+00 | 3,92E-02 | 2,35E-01 | Retnlg   | 0,11 | No  |
| ENSMUSG00000022652 | -2,68E+00 | -3,033645766 | 2,84E+00 | 9,17E-02 | 3,82E-01 | Morc1    | 0,16 | No  |
| ENSMUSG00000022656 | -1,18E+00 | -2,185582663 | 2,76E+00 | 9,69E-02 | 3,88E-01 | Nectin3  | 0,44 | No  |
| ENSMUSG00000022657 | -1,45E+00 | -2,226308158 | 3,74E+00 | 5,30E-02 | 2,81E-01 | Cd96     | 0,37 | No  |
| ENSMUSG00000022658 | 7,67E-01  | -2,963261668 | 3,24E-01 | 5,69E-01 | 8,30E-01 | Tagln3   | 1,70 | No  |
| ENSMUSG00000022659 | -1,47E-02 | -1,847721765 | 6,70E-04 | 9,79E-01 | 1,00E+00 | Gcsam    | 0,99 | No  |
| ENSMUSG00000022661 | -5,36E-01 | 4,145766908  | 4,04E+01 | 2,06E-10 | 1,85E-08 | Cd200    | 0,69 | Yes |
| ENSMUSG00000022663 | 1,63E-01  | 5,945422465  | 6,13E+00 | 1,33E-02 | 1,16E-01 | Atg3     | 1,12 | No  |
| ENSMUSG00000022664 | 3,58E-01  | 5,000180844  | 2,33E+01 | 1,40E-06 | 5,97E-05 | Slc35a5  | 1,28 | Yes |
| ENSMUSG00000022665 | 6,02E-01  | 6,618904884  | 9,13E+01 | 1,27E-21 | 3,33E-19 | Ccdc80   | 1,52 | Yes |
| ENSMUSG00000022667 | 3,13E-01  | 7,795751802  | 2,85E+01 | 9,29E-08 | 5,25E-06 | Cd200r1  | 1,24 | Yes |
| ENSMUSG00000022668 | 1,32E-01  | 4,364798108  | 2,63E+00 | 1,05E-01 | 3,97E-01 | Gtpbp8   | 1,10 | No  |

|                    |           |              |          |          |          |         |      |     |
|--------------------|-----------|--------------|----------|----------|----------|---------|------|-----|
| ENSMUSG00000022671 | -1,07E-01 | 3,220535757  | 1,01E+00 | 3,14E-01 | 6,14E-01 | Mzt2    | 0,93 | No  |
| ENSMUSG00000022672 | -1,08E-02 | 5,019444387  | 2,14E-02 | 8,84E-01 | 1,00E+00 | Prkdc   | 0,99 | No  |
| ENSMUSG00000022673 | 1,98E-01  | 6,448559378  | 9,86E+00 | 1,69E-03 | 2,45E-02 | Mcm4    | 1,15 | Yes |
| ENSMUSG00000022674 | 1,38E-01  | 3,530877439  | 1,98E+00 | 1,59E-01 | 5,06E-01 | Ube2v2  | 1,10 | No  |
| ENSMUSG00000022676 | 4,37E-01  | -2,655117831 | 1,49E-01 | 6,99E-01 | 9,04E-01 | Snai2   | 1,35 | No  |
| ENSMUSG00000022677 | 2,85E-02  | 4,316443222  | 1,17E-01 | 7,33E-01 | 9,23E-01 | Fopnl   | 1,02 | No  |
| ENSMUSG00000022678 | 5,86E-02  | 5,95169536   | 8,03E-01 | 3,70E-01 | 6,72E-01 | Nde1    | 1,04 | No  |
| ENSMUSG00000022679 | 4,20E-01  | 0,489885253  | 2,80E+00 | 9,42E-02 | 3,84E-01 | Mpv17l  | 1,34 | No  |
| ENSMUSG00000022680 | 6,48E-02  | 5,635319483  | 9,08E-01 | 3,41E-01 | 6,41E-01 | Pdxdc1  | 1,05 | No  |
| ENSMUSG00000022681 | -7,01E-03 | 4,931283493  | 8,79E-03 | 9,25E-01 | 1,00E+00 | Ntan1   | 1,00 | No  |
| ENSMUSG00000022682 | 2,57E-02  | 5,530523381  | 1,40E-01 | 7,09E-01 | 9,09E-01 | Rrn3    | 1,02 | No  |
| ENSMUSG00000022683 | 1,23E+00  | -2,896126345 | 9,34E-01 | 3,34E-01 | 6,34E-01 | Pla2g10 | 2,34 | No  |
| ENSMUSG00000022684 | 6,33E-02  | 5,592191574  | 8,63E-01 | 3,53E-01 | 6,54E-01 | Bfar    | 1,04 | No  |
| ENSMUSG00000022685 | -4,92E-02 | 3,589838742  | 2,61E-01 | 6,09E-01 | 8,51E-01 | Parn    | 0,97 | No  |
| ENSMUSG00000022686 | -7,72E-01 | 2,990849102  | 4,95E+01 | 1,98E-12 | 2,31E-10 | B3gnt5  | 0,59 | Yes |
| ENSMUSG00000022687 | 6,05E-01  | -1,126881387 | 1,50E+00 | 2,21E-01 | 5,50E-01 | Boc     | 1,52 | No  |
| ENSMUSG00000022696 | -8,24E-01 | -2,711703956 | 3,73E-01 | 5,41E-01 | 8,11E-01 | Sidt1   | 0,57 | No  |
| ENSMUSG00000022698 | 1,70E-01  | 7,222928304  | 7,98E+00 | 4,72E-03 | 5,35E-02 | Naa50   | 1,12 | No  |
| ENSMUSG00000022701 | 1,72E-01  | 2,422045581  | 1,72E+00 | 1,90E-01 | 5,50E-01 | Ccdc191 | 1,13 | No  |
| ENSMUSG00000022702 | 6,78E-02  | 4,995930924  | 8,38E-01 | 3,60E-01 | 6,61E-01 | Hira    | 1,05 | No  |
| ENSMUSG00000022704 | 3,72E-01  | 3,240446261  | 1,22E+01 | 4,82E-04 | 8,91E-03 | Qtrt2   | 1,29 | Yes |
| ENSMUSG00000022706 | -4,16E-02 | 4,779774188  | 2,93E-01 | 5,88E-01 | 8,40E-01 | Mrpl40  | 0,97 | No  |
| ENSMUSG00000022707 | -1,96E-02 | 3,84270991   | 4,52E-02 | 8,32E-01 | 9,78E-01 | Gbe1    | 0,99 | No  |
| ENSMUSG00000022708 | -3,78E-02 | 4,796430515  | 2,46E-01 | 6,20E-01 | 8,57E-01 | Zbtb20  | 0,97 | No  |
| ENSMUSG00000022710 | 1,78E-02  | 6,933920421  | 8,50E-02 | 7,71E-01 | 9,42E-01 | Usp7    | 1,01 | No  |
| ENSMUSG00000022711 | 1,10E-01  | 5,764305583  | 2,69E+00 | 1,01E-01 | 3,93E-01 | Pmm2    | 1,08 | No  |
| ENSMUSG00000022715 | 4,73E-01  | -2,226335835 | 3,04E-01 | 5,82E-01 | 8,38E-01 | Tmem114 | 1,39 | No  |
| ENSMUSG00000022718 | 2,08E-01  | 5,105000976  | 8,18E+00 | 4,24E-03 | 4,94E-02 | Dgcr8   | 1,15 | Yes |
| ENSMUSG00000022721 | 4,87E-02  | 5,779262246  | 5,30E-01 | 4,67E-01 | 7,55E-01 | Trmt2a  | 1,03 | No  |
| ENSMUSG00000022722 | -4,28E-02 | 2,807401366  | 1,34E-01 | 7,15E-01 | 9,12E-01 | Arl6    | 0,97 | No  |
| ENSMUSG00000022723 | -9,88E-03 | 5,639662787  | 2,10E-02 | 8,85E-01 | 1,00E+00 | Crybg3  | 0,99 | No  |
| ENSMUSG00000022724 | 6,30E-02  | 4,668288263  | 6,58E-01 | 4,17E-01 | 7,12E-01 | Riox2   | 1,04 | No  |

|                    |           |              |           |          |          |          |       |     |
|--------------------|-----------|--------------|-----------|----------|----------|----------|-------|-----|
| ENSMUSG00000022738 | 1,60E+00  | -2,711721439 | 1,76E+00  | 1,85E-01 | 5,49E-01 | Gsc2     | 3,03  | No  |
| ENSMUSG00000022742 | -2,27E-01 | 5,857978225  | 1,17E+01  | 6,10E-04 | 1,08E-02 | Cpox     | 0,85  | Yes |
| ENSMUSG00000022744 | -2,67E-01 | 8,038545089  | 2,10E+01  | 4,51E-06 | 1,65E-04 | Cldnd1   | 0,83  | Yes |
| ENSMUSG00000022747 | 2,40E-02  | 1,925252897  | 2,49E-02  | 8,75E-01 | 1,00E+00 | St3gal6  | 1,02  | No  |
| ENSMUSG00000022748 | 1,78E-01  | 0,574987291  | 5,39E-01  | 4,63E-01 | 7,51E-01 | Cmss1    | 1,13  | No  |
| ENSMUSG00000022749 | -6,51E-02 | 5,612342119  | 9,10E-01  | 3,40E-01 | 6,41E-01 | Tbc1d23  | 0,96  | No  |
| ENSMUSG00000022750 | -9,03E-02 | 4,131365613  | 1,10E+00  | 2,93E-01 | 5,89E-01 | Klhl22   | 0,94  | No  |
| ENSMUSG00000022751 | 1,89E-01  | 2,81996138   | 2,59E+00  | 1,08E-01 | 4,02E-01 | Nit2     | 1,14  | No  |
| ENSMUSG00000022752 | 3,84E-02  | 6,523781527  | 3,78E-01  | 5,39E-01 | 8,09E-01 | Tom70a   | 1,03  | No  |
| ENSMUSG00000022753 | 3,14E-02  | -3,107617333 | -7,69E-10 | 1,00E+00 | 1,00E+00 | Tmem30c  | 1,02  | No  |
| ENSMUSG00000022754 | -1,94E+00 | -3,107619243 | 1,50E+00  | 2,21E-01 | 5,50E-01 | Tmem45a  | 0,26  | No  |
| ENSMUSG00000022755 | 3,82E+00  | -2,655144808 | 6,73E+00  | 9,48E-03 | 8,98E-02 | Adgrg7   | 14,10 | No  |
| ENSMUSG00000022756 | 1,06E-01  | 2,068693246  | 4,93E-01  | 4,82E-01 | 7,70E-01 | Slc7a4   | 1,08  | No  |
| ENSMUSG00000022757 | 1,25E-02  | 6,321998095  | 3,87E-02  | 8,44E-01 | 9,86E-01 | Tfg      | 1,01  | No  |
| ENSMUSG00000022758 | 1,42E-01  | -0,412999667 | 1,62E-01  | 6,88E-01 | 8,98E-01 | P2rx6    | 1,10  | No  |
| ENSMUSG00000022759 | -9,44E-01 | -1,929196503 | 2,20E+00  | 1,38E-01 | 4,69E-01 | Lrrc74b  | 0,52  | No  |
| ENSMUSG00000022760 | 5,91E-02  | 4,24133905   | 4,89E-01  | 4,84E-01 | 7,72E-01 | Thap7    | 1,04  | No  |
| ENSMUSG00000022761 | -3,39E-03 | 5,846756337  | 2,62E-03  | 9,59E-01 | 1,00E+00 | Lztr1    | 1,00  | No  |
| ENSMUSG00000022762 | 1,22E+00  | -1,185651198 | 5,80E+00  | 1,60E-02 | 1,32E-01 | Ncam2    | 2,32  | No  |
| ENSMUSG00000022763 | -9,62E-01 | -0,097779683 | 1,07E+01  | 1,06E-03 | 1,70E-02 | Aifm3    | 0,51  | Yes |
| ENSMUSG00000022765 | 2,31E-02  | 6,668355824  | 1,39E-01  | 7,09E-01 | 9,09E-01 | Snap29   | 1,02  | No  |
| ENSMUSG00000022766 | -6,84E-01 | -1,9292547   | 1,07E+00  | 3,01E-01 | 5,98E-01 | Serpind1 | 0,62  | No  |
| ENSMUSG00000022768 | 8,11E-02  | 0,866025628  | 1,39E-01  | 7,09E-01 | 9,09E-01 | Ccdc116  | 1,06  | No  |
| ENSMUSG00000022769 | 1,20E-01  | 6,973214069  | 3,89E+00  | 4,85E-02 | 2,65E-01 | Sdf2l1   | 1,09  | No  |
| ENSMUSG00000022770 | -2,14E-02 | 6,082344173  | 1,08E-01  | 7,42E-01 | 9,27E-01 | Dlg1     | 0,99  | No  |
| ENSMUSG00000022771 | 7,31E-02  | 4,928968562  | 9,63E-01  | 3,26E-01 | 6,27E-01 | Ppil2    | 1,05  | No  |
| ENSMUSG00000022772 | 4,53E-02  | 5,172658448  | 3,98E-01  | 5,28E-01 | 8,04E-01 | Senp5    | 1,03  | No  |
| ENSMUSG00000022773 | -2,42E-01 | 2,649781188  | 3,93E+00  | 4,73E-02 | 2,60E-01 | Ypel1    | 0,85  | No  |
| ENSMUSG00000022774 | 1,17E-01  | 5,571462296  | 2,91E+00  | 8,80E-02 | 3,79E-01 | Ncbp2    | 1,08  | No  |
| ENSMUSG00000022779 | -1,24E-01 | 5,625559875  | 3,35E+00  | 6,73E-02 | 3,27E-01 | Top3b    | 0,92  | No  |
| ENSMUSG00000022781 | 3,77E-02  | 7,746738878  | 4,13E-01  | 5,21E-01 | 7,99E-01 | Pak2     | 1,03  | No  |
| ENSMUSG00000022783 | -1,87E+00 | -3,107637761 | 1,39E+00  | 2,38E-01 | 5,50E-01 | Spag6l   | 0,27  | No  |

|                    |           |              |           |          |          |          |      |     |
|--------------------|-----------|--------------|-----------|----------|----------|----------|------|-----|
| ENSMUSG00000022787 | -8,37E-02 | 3,405375709  | 6,92E-01  | 4,05E-01 | 7,02E-01 | Wdr53    | 0,94 | No  |
| ENSMUSG00000022788 | 1,06E-01  | 5,218478676  | 2,17E+00  | 1,41E-01 | 4,74E-01 | Fgd4     | 1,08 | No  |
| ENSMUSG00000022789 | -5,53E-02 | 6,766179062  | 8,10E-01  | 3,68E-01 | 6,69E-01 | Dnm1l    | 0,96 | No  |
| ENSMUSG00000022790 | 7,75E-01  | -2,711631285 | 3,25E-01  | 5,69E-01 | 8,30E-01 | Igsf11   | 1,71 | No  |
| ENSMUSG00000022791 | -2,26E-02 | 2,485358119  | 2,89E-02  | 8,65E-01 | 9,98E-01 | Tnk2     | 0,98 | No  |
| ENSMUSG00000022792 | 3,02E-01  | 3,573036977  | 9,51E+00  | 2,04E-03 | 2,84E-02 | Yars2    | 1,23 | Yes |
| ENSMUSG00000022793 | 2,92E-01  | 3,100454976  | 7,09E+00  | 7,77E-03 | 7,72E-02 | B4galt4  | 1,22 | No  |
| ENSMUSG00000022797 | 3,85E-01  | 6,684378071  | 3,87E+01  | 4,99E-10 | 4,29E-08 | Tfrc     | 1,31 | Yes |
| ENSMUSG00000022799 | 2,57E-02  | 8,088613267  | 1,97E-01  | 6,57E-01 | 8,80E-01 | Arhgap31 | 1,02 | No  |
| ENSMUSG00000022800 | -8,77E-02 | 5,826003246  | 1,73E+00  | 1,88E-01 | 5,50E-01 | Fytd1    | 0,94 | No  |
| ENSMUSG00000022801 | -1,46E-01 | 5,804605169  | 4,79E+00  | 2,86E-02 | 1,92E-01 | Lrch3    | 0,90 | No  |
| ENSMUSG00000022802 | 4,96E-01  | 3,413520578  | 2,36E+01  | 1,20E-06 | 5,23E-05 | Lmln     | 1,41 | Yes |
| ENSMUSG00000022803 | -4,49E-01 | -0,528841327 | 1,53E+00  | 2,16E-01 | 5,50E-01 | Popdc2   | 0,73 | No  |
| ENSMUSG00000022805 | -7,98E-02 | -2,497578469 | 5,75E-03  | 9,40E-01 | 1,00E+00 | Maats1   | 0,95 | No  |
| ENSMUSG00000022807 | 1,35E-01  | 5,542339842  | 3,85E+00  | 4,96E-02 | 2,69E-01 | Osbp11   | 1,10 | No  |
| ENSMUSG00000022808 | 2,14E-02  | 5,844261102  | 1,03E-01  | 7,48E-01 | 9,30E-01 | Snx4     | 1,01 | No  |
| ENSMUSG00000022809 | 2,40E-02  | -2,896127038 | -3,28E-11 | 1,00E+00 | 1,00E+00 | Nr1i2    | 1,02 | No  |
| ENSMUSG00000022811 | 2,01E-02  | 5,976489578  | 9,40E-02  | 7,59E-01 | 9,36E-01 | Zfp148   | 1,01 | No  |
| ENSMUSG00000022812 | -1,75E-02 | 6,909335498  | 8,13E-02  | 7,75E-01 | 9,45E-01 | Gsk3b    | 0,99 | No  |
| ENSMUSG00000022814 | 7,50E-02  | 5,250324886  | 1,10E+00  | 2,93E-01 | 5,89E-01 | Umps     | 1,05 | No  |
| ENSMUSG00000022816 | 1,87E-01  | 5,10096795   | 6,32E+00  | 1,19E-02 | 1,06E-01 | Fstl1    | 1,14 | No  |
| ENSMUSG00000022817 | 2,48E-01  | 6,626242263  | 1,58E+01  | 7,13E-05 | 1,82E-03 | Itgb5    | 1,19 | Yes |
| ENSMUSG00000022818 | 6,97E-01  | 2,957061103  | 3,59E+01  | 2,06E-09 | 1,60E-07 | Cyp2ab1  | 1,62 | Yes |
| ENSMUSG00000022820 | -1,50E-01 | 2,409516082  | 1,34E+00  | 2,48E-01 | 5,50E-01 | Ndufb4   | 0,90 | No  |
| ENSMUSG00000022821 | -1,46E+00 | -2,548201536 | 2,21E+00  | 1,37E-01 | 4,66E-01 | Hgd      | 0,36 | No  |
| ENSMUSG00000022822 | 1,92E-02  | 7,26562002   | 1,03E-01  | 7,49E-01 | 9,30E-01 | Abcc5    | 1,01 | No  |
| ENSMUSG00000022824 | -1,01E+00 | -2,185581928 | 1,57E+00  | 2,10E-01 | 5,50E-01 | Muc13    | 0,50 | No  |
| ENSMUSG00000022827 | -1,17E-01 | 3,91390686   | 1,62E+00  | 2,04E-01 | 5,50E-01 | Rab13    | 0,92 | No  |
| ENSMUSG00000022828 | 1,14E-01  | 4,227279186  | 1,84E+00  | 1,75E-01 | 5,33E-01 | Gtf2e1   | 1,08 | No  |
| ENSMUSG00000022829 | 1,81E+00  | -3,10765737  | 1,28E+00  | 2,58E-01 | 5,50E-01 | Stxbp5l  | 3,49 | No  |
| ENSMUSG00000022831 | -1,75E-02 | 7,885350789  | 9,00E-02  | 7,64E-01 | 9,39E-01 | Hcls1    | 0,99 | No  |
| ENSMUSG00000022832 | 9,01E-03  | -3,107646452 | -5,16E-10 | 1,00E+00 | 1,00E+00 | Ropn1    | 1,01 | No  |

|                    |           |              |          |          |          |             |      |     |
|--------------------|-----------|--------------|----------|----------|----------|-------------|------|-----|
| ENSMUSG00000022833 | 2,79E-01  | 2,730010935  | 5,33E+00 | 2,09E-02 | 1,56E-01 | Ccdc14      | 1,21 | No  |
| ENSMUSG00000022836 | -8,78E-01 | 5,118495769  | 1,47E+02 | 7,81E-34 | 5,57E-31 | Mylk        | 0,54 | Yes |
| ENSMUSG00000022837 | -4,45E-01 | 2,022824108  | 8,35E+00 | 3,85E-03 | 4,60E-02 | lqcb1       | 0,73 | Yes |
| ENSMUSG00000022838 | -2,76E-01 | -0,997982938 | 4,18E-01 | 5,18E-01 | 7,98E-01 | Eaf2        | 0,83 | No  |
| ENSMUSG00000022840 | 3,61E-01  | -1,289367948 | 6,34E-01 | 4,26E-01 | 7,20E-01 | Adcy5       | 1,28 | No  |
| ENSMUSG00000022841 | 7,98E-02  | 7,195273527  | 1,76E+00 | 1,84E-01 | 5,48E-01 | Ap2m1       | 1,06 | No  |
| ENSMUSG00000022842 | 2,08E-01  | 4,358139119  | 6,24E+00 | 1,25E-02 | 1,10E-01 | Ece2        | 1,15 | No  |
| ENSMUSG00000022843 | -1,55E-03 | 0,732041387  | 4,55E-05 | 9,95E-01 | 1,00E+00 | Clcn2       | 1,00 | No  |
| ENSMUSG00000022844 | 2,72E-01  | 1,601015614  | 2,61E+00 | 1,06E-01 | 3,99E-01 | Pdia5       | 1,21 | No  |
| ENSMUSG00000022848 | 8,74E-03  | 5,690523478  | 1,68E-02 | 8,97E-01 | 1,00E+00 | Dirc2       | 1,01 | No  |
| ENSMUSG00000022849 | -4,94E-02 | 4,057137748  | 3,26E-01 | 5,68E-01 | 8,30E-01 | Hspbap1     | 0,97 | No  |
| ENSMUSG00000022853 | -5,36E-02 | 3,525987834  | 3,00E-01 | 5,84E-01 | 8,38E-01 | Ehhadh      | 0,96 | No  |
| ENSMUSG00000022855 | 1,39E-01  | 6,238263521  | 4,69E+00 | 3,03E-02 | 2,00E-01 | Senp2       | 1,10 | No  |
| ENSMUSG00000022856 | 1,47E-01  | 3,34040658   | 1,97E+00 | 1,61E-01 | 5,09E-01 | Tmem41a     | 1,11 | No  |
| ENSMUSG00000022858 | 5,42E-02  | 6,487522001  | 7,48E-01 | 3,87E-01 | 6,87E-01 | Tra2b       | 1,04 | No  |
| ENSMUSG00000022861 | 3,34E-01  | 1,202894971  | 2,87E+00 | 9,04E-02 | 3,81E-01 | Dgkg        | 1,26 | No  |
| ENSMUSG00000022863 | -6,76E-02 | 2,178896152  | 2,13E-01 | 6,45E-01 | 8,73E-01 | Btg3        | 0,95 | No  |
| ENSMUSG00000022864 | -1,83E-01 | 3,932536763  | 3,91E+00 | 4,79E-02 | 2,63E-01 | D16Ertd472e | 0,88 | No  |
| ENSMUSG00000022865 | -1,95E-01 | -1,344148276 | 1,54E-01 | 6,95E-01 | 9,02E-01 | Cxadr       | 0,87 | No  |
| ENSMUSG00000022867 | 5,48E-02  | 6,756922633  | 7,91E-01 | 3,74E-01 | 6,75E-01 | Usp25       | 1,04 | No  |
| ENSMUSG00000022871 | -3,81E-01 | -2,31118857  | 1,83E-01 | 6,69E-01 | 8,87E-01 | Fetub       | 0,77 | No  |
| ENSMUSG00000022875 | -1,03E-01 | -2,831985655 | 7,40E-03 | 9,31E-01 | 1,00E+00 | Kng1        | 0,93 | No  |
| ENSMUSG00000022876 | -6,91E-01 | 6,784555783  | 1,27E+02 | 2,23E-29 | 1,13E-26 | Samsn1      | 0,62 | Yes |
| ENSMUSG00000022878 | -7,22E-02 | -2,655052582 | 3,49E-03 | 9,53E-01 | 1,00E+00 | Adipoq      | 0,95 | No  |
| ENSMUSG00000022881 | -9,03E-02 | 2,962878093  | 6,28E-01 | 4,28E-01 | 7,22E-01 | Rfc4        | 0,94 | No  |
| ENSMUSG00000022883 | -7,10E-02 | -2,832035322 | 3,45E-03 | 9,53E-01 | 1,00E+00 | Robo1       | 0,95 | No  |
| ENSMUSG00000022884 | -3,17E-01 | 7,757753304  | 2,91E+01 | 6,89E-08 | 3,98E-06 | Eif4a2      | 0,80 | Yes |
| ENSMUSG00000022885 | 4,52E-01  | 6,077825144  | 4,77E+01 | 4,88E-12 | 5,52E-10 | St6gal1     | 1,37 | Yes |
| ENSMUSG00000022887 | 6,97E-01  | -1,963296861 | 8,66E-01 | 3,52E-01 | 6,53E-01 | Masp1       | 1,62 | No  |
| ENSMUSG00000022889 | -2,05E-01 | 4,313913873  | 6,07E+00 | 1,38E-02 | 1,18E-01 | Mrpl39      | 0,87 | No  |
| ENSMUSG00000022890 | -9,03E-02 | 6,548532758  | 2,08E+00 | 1,49E-01 | 4,89E-01 | Atp5j       | 0,94 | No  |
| ENSMUSG00000022892 | 8,14E-04  | 9,302978044  | 2,06E-04 | 9,89E-01 | 1,00E+00 | App         | 1,00 | No  |



|                    |           |              |          |          |          |               |      |     |
|--------------------|-----------|--------------|----------|----------|----------|---------------|------|-----|
| ENSMUSG00000022893 | -4,98E-03 | -0,051841254 | 2,69E-04 | 9,87E-01 | 1,00E+00 | Adamts1       | 1,00 | No  |
| ENSMUSG00000022895 | -1,85E-01 | 6,699197751  | 8,78E+00 | 3,05E-03 | 3,87E-02 | Ets2          | 0,88 | Yes |
| ENSMUSG00000022897 | -1,66E-02 | 6,833449129  | 7,31E-02 | 7,87E-01 | 9,53E-01 | Dyrk1a        | 0,99 | No  |
| ENSMUSG00000022898 | 9,34E-02  | 6,628449093  | 2,27E+00 | 1,32E-01 | 4,56E-01 | Dscr3         | 1,07 | No  |
| ENSMUSG00000022899 | -4,63E-01 | 2,954130096  | 1,72E+01 | 3,30E-05 | 9,53E-04 | Slc15a2       | 0,73 | Yes |
| ENSMUSG00000022900 | -8,38E-02 | 1,334675384  | 1,99E-01 | 6,56E-01 | 8,79E-01 | lldr1         | 0,94 | No  |
| ENSMUSG00000022901 | -6,04E-01 | 7,055694375  | 9,93E+01 | 2,15E-23 | 6,78E-21 | Cd86          | 0,66 | Yes |
| ENSMUSG00000022902 | 1,60E+00  | 0,872412319  | 4,61E+01 | 1,13E-11 | 1,18E-09 | Stfa2         | 3,04 | Yes |
| ENSMUSG00000022905 | 4,78E-02  | 6,360627766  | 5,66E-01 | 4,52E-01 | 7,41E-01 | Kpna1         | 1,03 | No  |
| ENSMUSG00000022906 | -1,45E-01 | 5,998968394  | 4,94E+00 | 2,62E-02 | 1,81E-01 | Parp9         | 0,90 | No  |
| ENSMUSG00000022911 | -3,67E-02 | 3,466662592  | 1,33E-01 | 7,15E-01 | 9,13E-01 | Arl13b        | 0,97 | No  |
| ENSMUSG00000022912 | 2,53E-01  | 6,265249507  | 1,54E+01 | 8,48E-05 | 2,12E-03 | Pros1         | 1,19 | Yes |
| ENSMUSG00000022913 | -3,09E-03 | 3,397614345  | 9,05E-04 | 9,76E-01 | 1,00E+00 | Psmg1         | 1,00 | No  |
| ENSMUSG00000022914 | 8,49E-02  | 5,883672952  | 1,64E+00 | 2,00E-01 | 5,50E-01 | Brwd1         | 1,06 | No  |
| ENSMUSG00000022915 | 1,82E+00  | -3,033661385 | 1,31E+00 | 2,52E-01 | 5,50E-01 | 1700093J21Rik | 3,54 | No  |
| ENSMUSG00000022938 | 2,61E-02  | -0,31124622  | 6,71E-03 | 9,35E-01 | 1,00E+00 | Fam3b         | 1,02 | No  |
| ENSMUSG00000022940 | -2,33E-01 | 2,303807653  | 3,01E+00 | 8,25E-02 | 3,69E-01 | Pigp          | 0,85 | No  |
| ENSMUSG00000022941 | -5,64E-01 | -1,26813811  | 1,14E+00 | 2,86E-01 | 5,82E-01 | Ripply3       | 0,68 | No  |
| ENSMUSG00000022945 | 8,27E-02  | 4,679344717  | 1,10E+00 | 2,94E-01 | 5,90E-01 | Chaf1b        | 1,06 | No  |
| ENSMUSG00000022946 | 6,34E-02  | 6,196922602  | 9,75E-01 | 3,23E-01 | 6,24E-01 | Dopey2        | 1,04 | No  |
| ENSMUSG00000022947 | 4,45E-02  | 3,848827413  | 2,30E-01 | 6,31E-01 | 8,64E-01 | Cbr3          | 1,03 | No  |
| ENSMUSG00000022948 | 1,03E-01  | 2,091775882  | 5,19E-01 | 4,71E-01 | 7,60E-01 | Setd4         | 1,07 | No  |
| ENSMUSG00000022949 | 1,12E-01  | -0,333287346 | 1,13E-01 | 7,37E-01 | 9,25E-01 | Clic6         | 1,08 | No  |
| ENSMUSG00000022951 | 7,50E-02  | 4,174892006  | 7,73E-01 | 3,79E-01 | 6,80E-01 | Rcan1         | 1,05 | No  |
| ENSMUSG00000022952 | 1,85E-01  | 7,376542829  | 9,60E+00 | 1,95E-03 | 2,75E-02 | Runx1         | 1,14 | Yes |
| ENSMUSG00000022956 | 1,31E-03  | 4,206285047  | 2,38E-04 | 9,88E-01 | 1,00E+00 | Atp5o         | 1,00 | No  |
| ENSMUSG00000022957 | 2,21E-01  | 5,433425445  | 1,00E+01 | 1,56E-03 | 2,30E-02 | Itsn1         | 1,17 | Yes |
| ENSMUSG00000022960 | -1,01E-01 | 4,14263974   | 1,40E+00 | 2,37E-01 | 5,50E-01 | Donson        | 0,93 | No  |
| ENSMUSG00000022961 | -2,08E-02 | 9,337240416  | 1,35E-01 | 7,13E-01 | 9,12E-01 | Son           | 0,99 | No  |
| ENSMUSG00000022962 | 1,19E-01  | 6,046900642  | 3,36E+00 | 6,70E-02 | 3,26E-01 | Gart          | 1,09 | No  |
| ENSMUSG00000022964 | 6,09E-02  | 6,882052338  | 9,93E-01 | 3,19E-01 | 6,19E-01 | Tmem50b       | 1,04 | No  |
| ENSMUSG00000022965 | 1,32E-02  | 6,748359315  | 4,62E-02 | 8,30E-01 | 9,77E-01 | lfngr2        | 1,01 | No  |

|                    |           |              |          |          |          |               |      |     |
|--------------------|-----------|--------------|----------|----------|----------|---------------|------|-----|
| ENSMUSG00000022967 | -4,81E-02 | 7,163413782  | 6,39E-01 | 4,24E-01 | 7,19E-01 | lfnar1        | 0,97 | No  |
| ENSMUSG00000022969 | 3,93E-02  | 6,231212067  | 3,77E-01 | 5,39E-01 | 8,10E-01 | Il10rb        | 1,03 | No  |
| ENSMUSG00000022971 | 6,07E-02  | 5,610007367  | 7,88E-01 | 3,75E-01 | 6,76E-01 | lfnar2        | 1,04 | No  |
| ENSMUSG00000022972 | 1,30E-01  | 2,616788383  | 1,06E+00 | 3,02E-01 | 5,99E-01 | 1110004E09Rik | 1,09 | No  |
| ENSMUSG00000022973 | 6,03E-02  | 7,285279752  | 1,02E+00 | 3,13E-01 | 6,13E-01 | Synj1         | 1,04 | No  |
| ENSMUSG00000022974 | -1,12E-01 | 6,755684179  | 3,32E+00 | 6,86E-02 | 3,29E-01 | Paxbp1        | 0,93 | No  |
| ENSMUSG00000022978 | 1,21E-01  | 4,398537458  | 2,14E+00 | 1,44E-01 | 4,79E-01 | Mis18a        | 1,09 | No  |
| ENSMUSG00000022982 | -4,78E-02 | 4,652128035  | 3,77E-01 | 5,39E-01 | 8,09E-01 | Sod1          | 0,97 | No  |
| ENSMUSG00000022983 | 4,50E-02  | 5,549931539  | 4,24E-01 | 5,15E-01 | 7,96E-01 | Scaf4         | 1,03 | No  |
| ENSMUSG00000022986 | 2,67E+00  | -3,033636951 | 2,76E+00 | 9,68E-02 | 3,88E-01 | Krt75         | 6,36 | No  |
| ENSMUSG00000022987 | 7,35E-01  | -2,896146969 | 2,94E-01 | 5,87E-01 | 8,40E-01 | Zfp641        | 1,66 | No  |
| ENSMUSG00000022991 | 1,81E+00  | -3,10765737  | 1,28E+00 | 2,58E-01 | 5,50E-01 | Lalba         | 3,49 | No  |
| ENSMUSG00000022992 | -5,86E-02 | 4,265621068  | 4,83E-01 | 4,87E-01 | 7,74E-01 | Kansl2        | 0,96 | No  |
| ENSMUSG00000022993 | -5,37E-01 | -0,929122123 | 1,90E+00 | 1,68E-01 | 5,23E-01 | 4930415O20Rik | 0,69 | No  |
| ENSMUSG00000022994 | -8,16E-01 | 7,218713626  | 1,84E+02 | 6,64E-42 | 9,48E-39 | Adcy6         | 0,57 | Yes |
| ENSMUSG00000022995 | -9,09E-02 | 6,63281096   | 2,14E+00 | 1,43E-01 | 4,79E-01 | Enah          | 0,94 | No  |
| ENSMUSG00000022996 | -4,39E-01 | -2,448707129 | 1,97E-01 | 6,57E-01 | 8,80E-01 | Wnt10b        | 0,74 | No  |
| ENSMUSG00000022997 | 7,34E-01  | -2,896122591 | 2,93E-01 | 5,88E-01 | 8,40E-01 | Wnt1          | 1,66 | No  |
| ENSMUSG00000022999 | -1,73E-01 | 4,593696949  | 4,76E+00 | 2,92E-02 | 1,94E-01 | Lmbr1l        | 0,89 | No  |
| ENSMUSG00000023000 | 1,60E+00  | -2,770621501 | 1,75E+00 | 1,86E-01 | 5,50E-01 | Dhh           | 3,02 | No  |
| ENSMUSG00000023004 | 1,19E-01  | 9,062889278  | 4,40E+00 | 3,59E-02 | 2,25E-01 | Tuba1b        | 1,09 | No  |
| ENSMUSG00000023007 | -9,37E-02 | 2,283120424  | 4,64E-01 | 4,96E-01 | 7,81E-01 | Prpf40b       | 0,94 | No  |
| ENSMUSG00000023008 | 8,88E-02  | 4,936252936  | 1,37E+00 | 2,42E-01 | 5,50E-01 | Fmnl3         | 1,06 | No  |
| ENSMUSG00000023009 | 4,84E-02  | 3,904800936  | 2,83E-01 | 5,95E-01 | 8,44E-01 | Nckap5l       | 1,03 | No  |
| ENSMUSG00000023010 | 3,17E-02  | 8,776561168  | 3,08E-01 | 5,79E-01 | 8,36E-01 | Tmbim6        | 1,02 | No  |
| ENSMUSG00000023013 | 1,87E+00  | -3,107639691 | 1,38E+00 | 2,40E-01 | 5,50E-01 | Aqp2          | 3,67 | No  |
| ENSMUSG00000023015 | 2,10E-01  | 5,956630001  | 1,02E+01 | 1,40E-03 | 2,12E-02 | Racgap1       | 1,16 | Yes |
| ENSMUSG00000023017 | -4,21E-01 | 0,604866737  | 3,13E+00 | 7,68E-02 | 3,53E-01 | Asic1         | 0,75 | No  |
| ENSMUSG00000023018 | -9,26E-02 | 4,793958578  | 1,47E+00 | 2,25E-01 | 5,50E-01 | Smarcd1       | 0,94 | No  |
| ENSMUSG00000023019 | -6,40E-01 | -0,060611252 | 4,77E+00 | 2,90E-02 | 1,94E-01 | Gpd1          | 0,64 | No  |
| ENSMUSG00000023020 | -7,71E-03 | 4,90892197   | 1,06E-02 | 9,18E-01 | 1,00E+00 | Cox14         | 0,99 | No  |
| ENSMUSG00000023021 | -3,87E-02 | 6,287458449  | 3,71E-01 | 5,42E-01 | 8,12E-01 | Cers5         | 0,97 | No  |

|                    |           |              |          |          |          |          |      |     |
|--------------------|-----------|--------------|----------|----------|----------|----------|------|-----|
| ENSMUSG00000023022 | -2,99E-01 | 6,884609701  | 2,41E+01 | 8,98E-07 | 4,06E-05 | Lima1    | 0,81 | Yes |
| ENSMUSG00000023025 | 3,07E-02  | 6,144039218  | 2,27E-01 | 6,33E-01 | 8,65E-01 | Larp4    | 1,02 | No  |
| ENSMUSG00000023026 | 1,19E-02  | 6,56836147   | 3,64E-02 | 8,49E-01 | 9,88E-01 | Dip2b    | 1,01 | No  |
| ENSMUSG00000023027 | 2,02E-02  | 5,294863625  | 8,10E-02 | 7,76E-01 | 9,46E-01 | Atf1     | 1,01 | No  |
| ENSMUSG00000023030 | -2,72E-02 | 5,284672037  | 1,46E-01 | 7,03E-01 | 9,06E-01 | Slc11a2  | 0,98 | No  |
| ENSMUSG00000023031 | 4,24E-01  | -0,770504491 | 1,13E+00 | 2,87E-01 | 5,83E-01 | Cela1    | 1,34 | No  |
| ENSMUSG00000023032 | -6,70E-01 | 5,893216886  | 1,04E+02 | 1,67E-24 | 5,77E-22 | Slc4a8   | 0,63 | Yes |
| ENSMUSG00000023033 | -1,92E+00 | -2,963214917 | 1,46E+00 | 2,27E-01 | 5,50E-01 | Scn8a    | 0,26 | No  |
| ENSMUSG00000023034 | -1,46E-01 | 3,698664543  | 2,03E+00 | 1,55E-01 | 4,98E-01 | Nr4a1    | 0,90 | No  |
| ENSMUSG00000023036 | -4,45E-01 | -1,317757456 | 7,75E-01 | 3,79E-01 | 6,79E-01 | Pcdhgc4  | 0,73 | No  |
| ENSMUSG00000023039 | -1,74E+00 | -2,770603931 | 2,12E+00 | 1,46E-01 | 4,83E-01 | Krt7     | 0,30 | No  |
| ENSMUSG00000023043 | -1,94E+00 | -3,107619243 | 1,50E+00 | 2,21E-01 | 5,50E-01 | Krt18    | 0,26 | No  |
| ENSMUSG00000023044 | -2,49E-01 | 2,335993996  | 3,41E+00 | 6,47E-02 | 3,19E-01 | Csad     | 0,84 | No  |
| ENSMUSG00000023045 | -2,84E-01 | 0,502835099  | 1,37E+00 | 2,41E-01 | 5,50E-01 | Soat2    | 0,82 | No  |
| ENSMUSG00000023046 | -4,90E-02 | -2,711701209 | 1,12E-03 | 9,73E-01 | 1,00E+00 | Igfbp6   | 0,97 | No  |
| ENSMUSG00000023047 | -2,71E+00 | -2,896125742 | 2,90E+00 | 8,85E-02 | 3,79E-01 | Amhr2    | 0,15 | No  |
| ENSMUSG00000023048 | -1,39E-01 | 7,881225736  | 5,63E+00 | 1,76E-02 | 1,39E-01 | Prr13    | 0,91 | No  |
| ENSMUSG00000023050 | -9,30E-02 | 5,394787444  | 1,76E+00 | 1,84E-01 | 5,48E-01 | Map3k12  | 0,94 | No  |
| ENSMUSG00000023051 | -1,48E-02 | 4,09018842   | 2,90E-02 | 8,65E-01 | 9,98E-01 | Tarbp2   | 0,99 | No  |
| ENSMUSG00000023052 | -4,32E-01 | 0,253245328  | 2,43E+00 | 1,19E-01 | 4,30E-01 | Npff     | 0,74 | No  |
| ENSMUSG00000023055 | -1,87E-01 | 4,921468189  | 6,26E+00 | 1,24E-02 | 1,09E-01 | Calcoco1 | 0,88 | No  |
| ENSMUSG00000023064 | -2,73E+00 | -2,896107236 | 2,95E+00 | 8,57E-02 | 3,76E-01 | Sncg     | 0,15 | No  |
| ENSMUSG00000023066 | 3,09E-01  | 4,403674975  | 1,41E+01 | 1,74E-04 | 3,87E-03 | Rttm     | 1,24 | Yes |
| ENSMUSG00000023067 | -1,81E-01 | 9,383410659  | 1,02E+01 | 1,42E-03 | 2,14E-02 | Cdkn1a   | 0,88 | Yes |
| ENSMUSG00000023068 | 1,76E-04  | 7,073428166  | 8,36E-06 | 9,98E-01 | 1,00E+00 | Nus1     | 1,00 | No  |
| ENSMUSG00000023072 | 2,50E-01  | 3,445214459  | 6,12E+00 | 1,34E-02 | 1,16E-01 | Cep89    | 1,19 | No  |
| ENSMUSG00000023075 | -2,28E-02 | 6,649067912  | 1,34E-01 | 7,14E-01 | 9,12E-01 | Akirin1  | 0,98 | No  |
| ENSMUSG00000023079 | -1,73E-01 | 3,996213037  | 3,74E+00 | 5,30E-02 | 2,81E-01 | Gtf2ird1 | 0,89 | No  |
| ENSMUSG00000023083 | 1,87E+00  | -3,03364371  | 1,36E+00 | 2,43E-01 | 5,50E-01 | H2-M10.2 | 3,66 | No  |
| ENSMUSG00000023084 | 1,75E-01  | 2,899233827  | 2,26E+00 | 1,33E-01 | 4,59E-01 | Lrrc71   | 1,13 | No  |
| ENSMUSG00000023087 | 8,13E-02  | 4,762439388  | 1,13E+00 | 2,88E-01 | 5,84E-01 | Noct     | 1,06 | No  |
| ENSMUSG00000023088 | 3,14E-02  | 7,640058447  | 2,84E-01 | 5,94E-01 | 8,43E-01 | Abcc1    | 1,02 | No  |

|                    |           |              |           |          |          |          |      |     |
|--------------------|-----------|--------------|-----------|----------|----------|----------|------|-----|
| ENSMUSG00000023089 | 1,96E-01  | 3,568443009  | 4,00E+00  | 4,55E-02 | 2,54E-01 | Ndufa5   | 1,15 | No  |
| ENSMUSG00000023094 | -1,41E-01 | 2,484106715  | 1,16E+00  | 2,81E-01 | 5,78E-01 | Msrb2    | 0,91 | No  |
| ENSMUSG00000023104 | 1,18E-01  | 6,314151601  | 3,46E+00  | 6,27E-02 | 3,12E-01 | Rfc2     | 1,09 | No  |
| ENSMUSG00000023106 | 5,13E-02  | 5,513770465  | 5,52E-01  | 4,58E-01 | 7,47E-01 | Denr     | 1,04 | No  |
| ENSMUSG00000023110 | 7,70E-02  | 4,581995931  | 9,46E-01  | 3,31E-01 | 6,31E-01 | Prmt5    | 1,05 | No  |
| ENSMUSG00000023118 | 4,60E-02  | 7,112982442  | 5,82E-01  | 4,46E-01 | 7,37E-01 | Sympk    | 1,03 | No  |
| ENSMUSG00000023140 | 1,87E+00  | -3,107639691 | 1,38E+00  | 2,40E-01 | 5,50E-01 | Reg2     | 3,67 | No  |
| ENSMUSG00000023143 | 1,96E-01  | 6,403921805  | 9,52E+00  | 2,03E-03 | 2,83E-02 | Nagpa    | 1,15 | Yes |
| ENSMUSG00000023147 | 8,44E-02  | 2,87118756   | 5,26E-01  | 4,68E-01 | 7,57E-01 | Wrb      | 1,06 | No  |
| ENSMUSG00000023150 | 1,23E-02  | 8,330094666  | 4,53E-02  | 8,31E-01 | 9,78E-01 | Ivns1abp | 1,01 | No  |
| ENSMUSG00000023151 | -7,90E-02 | -2,831990502 | 2,64E-03  | 9,59E-01 | 1,00E+00 | Lrrc69   | 0,95 | No  |
| ENSMUSG00000023153 | -9,23E-01 | -1,355380086 | 3,45E+00  | 6,32E-02 | 3,14E-01 | Tmem52   | 0,53 | No  |
| ENSMUSG00000023156 | 1,70E-01  | 3,606841879  | 3,11E+00  | 7,78E-02 | 3,56E-01 | Rpp14    | 1,13 | No  |
| ENSMUSG00000023159 | 9,01E-03  | -3,107646452 | -5,16E-10 | 1,00E+00 | 1,00E+00 | Psg29    | 1,01 | No  |
| ENSMUSG00000023169 | 1,33E-01  | 7,441545066  | 5,02E+00  | 2,51E-02 | 1,75E-01 | Slc38a1  | 1,10 | No  |
| ENSMUSG00000023170 | -4,67E-02 | 4,695952194  | 3,59E-01  | 5,49E-01 | 8,16E-01 | Gps2     | 0,97 | No  |
| ENSMUSG00000023175 | 1,32E-01  | 7,633538501  | 5,05E+00  | 2,47E-02 | 1,73E-01 | Bsg      | 1,10 | No  |
| ENSMUSG00000023176 | 2,57E+00  | -3,0336723   | 2,56E+00  | 1,10E-01 | 4,06E-01 | Cpn2     | 5,96 | No  |
| ENSMUSG00000023186 | -1,88E-01 | 7,445136604  | 1,00E+01  | 1,53E-03 | 2,26E-02 | Vwa5a    | 0,88 | Yes |
| ENSMUSG00000023191 | 4,89E-02  | 1,448559072  | 7,46E-02  | 7,85E-01 | 9,51E-01 | P3h3     | 1,03 | No  |
| ENSMUSG00000023192 | 1,87E+00  | -3,107639691 | 1,38E+00  | 2,40E-01 | 5,50E-01 | Grm2     | 3,67 | No  |
| ENSMUSG00000023206 | -5,13E-01 | 4,078846143  | 3,58E+01  | 2,15E-09 | 1,67E-07 | Il15ra   | 0,70 | Yes |
| ENSMUSG00000023216 | -1,44E+00 | -2,033542874 | 3,68E+00  | 5,51E-02 | 2,88E-01 | Epb42    | 0,37 | No  |
| ENSMUSG00000023224 | -1,97E+00 | -0,682829293 | 2,25E+01  | 2,11E-06 | 8,50E-05 | Serping1 | 0,25 | Yes |
| ENSMUSG00000023232 | 3,66E-01  | -1,683156871 | 3,23E-01  | 5,70E-01 | 8,31E-01 | Serinc2  | 1,29 | No  |
| ENSMUSG00000023235 | -1,11E-01 | 2,591673419  | 7,87E-01  | 3,75E-01 | 6,76E-01 | Ccl25    | 0,93 | No  |
| ENSMUSG00000023236 | 2,76E-01  | -2,548241042 | 7,75E-02  | 7,81E-01 | 9,49E-01 | Scg5     | 1,21 | No  |
| ENSMUSG00000023243 | -7,15E-02 | -2,311130876 | 7,07E-03  | 9,33E-01 | 1,00E+00 | Kcnk5    | 0,95 | No  |
| ENSMUSG00000023247 | 1,55E+00  | -2,10763576  | 3,62E+00  | 5,69E-02 | 2,93E-01 | Guca2a   | 2,94 | No  |
| ENSMUSG00000023249 | -4,69E-02 | 5,66186857   | 4,80E-01  | 4,88E-01 | 7,75E-01 | Parp3    | 0,97 | No  |
| ENSMUSG00000023259 | 1,76E-01  | 3,444776353  | 3,11E+00  | 7,80E-02 | 3,57E-01 | Slc26a6  | 1,13 | No  |
| ENSMUSG00000023262 | -1,09E-01 | 2,514395594  | 6,74E-01  | 4,12E-01 | 7,07E-01 | Acy1     | 0,93 | No  |

|                    |           |              |          |          |          |          |      |     |
|--------------------|-----------|--------------|----------|----------|----------|----------|------|-----|
| ENSMUSG00000023266 | 5,51E-01  | 0,344548316  | 4,40E+00 | 3,59E-02 | 2,25E-01 | Frs3     | 1,46 | No  |
| ENSMUSG00000023267 | 1,26E+00  | -2,655126047 | 9,87E-01 | 3,20E-01 | 6,21E-01 | Gabbr2   | 2,40 | No  |
| ENSMUSG00000023272 | 4,59E-02  | 5,297163157  | 4,15E-01 | 5,20E-01 | 7,99E-01 | Creld2   | 1,03 | No  |
| ENSMUSG00000023274 | -1,66E+00 | -0,136036558 | 2,30E+01 | 1,60E-06 | 6,70E-05 | Cd4      | 0,32 | Yes |
| ENSMUSG00000023277 | 1,45E-01  | 6,810822143  | 5,59E+00 | 1,80E-02 | 1,41E-01 | Twf2     | 1,11 | No  |
| ENSMUSG00000023284 | 6,03E-02  | 2,426717088  | 2,10E-01 | 6,46E-01 | 8,74E-01 | Zfp605   | 1,04 | No  |
| ENSMUSG00000023286 | -7,33E-02 | 5,489999003  | 1,11E+00 | 2,91E-01 | 5,87E-01 | Ube2j2   | 0,95 | No  |
| ENSMUSG00000023307 | -1,29E-01 | 5,728476085  | 3,68E+00 | 5,52E-02 | 2,88E-01 | March5   | 0,91 | No  |
| ENSMUSG00000023328 | -5,93E-01 | -2,185650891 | 4,79E-01 | 4,89E-01 | 7,76E-01 | Ache     | 0,66 | No  |
| ENSMUSG00000023330 | 2,72E-01  | 1,545127357  | 2,40E+00 | 1,22E-01 | 4,35E-01 | Dtwd1    | 1,21 | No  |
| ENSMUSG00000023333 | 4,55E-01  | -2,44872376  | 2,80E-01 | 5,97E-01 | 8,45E-01 | Gcm1     | 1,37 | No  |
| ENSMUSG00000023341 | -3,60E-01 | 3,326778207  | 1,26E+01 | 3,95E-04 | 7,57E-03 | Mx2      | 0,78 | Yes |
| ENSMUSG00000023345 | 2,00E-01  | 3,488145012  | 3,95E+00 | 4,70E-02 | 2,59E-01 | Poc1a    | 1,15 | No  |
| ENSMUSG00000023348 | 1,63E-01  | 1,955984717  | 1,15E+00 | 2,84E-01 | 5,81E-01 | Trip6    | 1,12 | No  |
| ENSMUSG00000023349 | 9,57E-02  | 10,57342336  | 2,91E+00 | 8,78E-02 | 3,78E-01 | Clec4n   | 1,07 | No  |
| ENSMUSG00000023353 | 1,31E-01  | 6,241459167  | 4,21E+00 | 4,02E-02 | 2,38E-01 | Agap3    | 1,10 | No  |
| ENSMUSG00000023367 | -7,66E-01 | 6,048317123  | 1,40E+02 | 2,72E-32 | 1,81E-29 | Tmem176a | 0,59 | Yes |
| ENSMUSG00000023393 | 1,43E-01  | 2,960792762  | 1,56E+00 | 2,11E-01 | 5,50E-01 | Slc17a9  | 1,10 | No  |
| ENSMUSG00000023411 | -2,82E-01 | -0,800813311 | 5,18E-01 | 4,72E-01 | 7,60E-01 | Nfatc4   | 0,82 | No  |
| ENSMUSG00000023439 | 8,28E-02  | -0,322039642 | 6,19E-02 | 8,04E-01 | 9,62E-01 | Gnb3     | 1,06 | No  |
| ENSMUSG00000023452 | 5,10E-02  | 6,414822177  | 6,51E-01 | 4,20E-01 | 7,15E-01 | Pisd     | 1,04 | No  |
| ENSMUSG00000023456 | 2,28E-01  | 7,961131712  | 1,53E+01 | 9,33E-05 | 2,28E-03 | Tpi1     | 1,17 | Yes |
| ENSMUSG00000023460 | -1,92E-01 | 5,714930914  | 8,12E+00 | 4,38E-03 | 5,06E-02 | Rab12    | 0,88 | No  |
| ENSMUSG00000023467 | -2,35E-01 | 0,730499592  | 1,10E+00 | 2,94E-01 | 5,89E-01 | Tulp2    | 0,85 | No  |
| ENSMUSG00000023473 | 2,12E-01  | 3,678396223  | 4,89E+00 | 2,71E-02 | 1,85E-01 | Celsr3   | 1,16 | No  |
| ENSMUSG00000023484 | -2,30E-01 | -1,185753742 | 2,47E-01 | 6,19E-01 | 8,56E-01 | Prph     | 0,85 | No  |
| ENSMUSG00000023495 | -3,90E-01 | 2,974470113  | 1,18E+01 | 5,89E-04 | 1,05E-02 | Pcbp4    | 0,76 | Yes |
| ENSMUSG00000023505 | 1,64E-01  | 5,867098506  | 6,07E+00 | 1,37E-02 | 1,18E-01 | Cdca3    | 1,12 | No  |
| ENSMUSG00000023571 | -3,34E-02 | 3,395411226  | 1,08E-01 | 7,42E-01 | 9,27E-01 | C1qtnf12 | 0,98 | No  |
| ENSMUSG00000023572 | -1,06E-01 | 4,93833425   | 2,04E+00 | 1,53E-01 | 4,96E-01 | Ccndbp1  | 0,93 | No  |
| ENSMUSG00000023707 | 5,11E-02  | 4,113500942  | 3,45E-01 | 5,57E-01 | 8,21E-01 | Ogfod2   | 1,04 | No  |
| ENSMUSG00000023723 | -6,08E-03 | 5,384619239  | 7,51E-03 | 9,31E-01 | 1,00E+00 | Mrps23   | 1,00 | No  |

|                    |           |              |          |          |          |               |      |     |
|--------------------|-----------|--------------|----------|----------|----------|---------------|------|-----|
| ENSMUSG00000023737 | -9,16E-01 | -2,711720553 | 5,96E-01 | 4,40E-01 | 7,32E-01 | 1700082M22Rik | 0,53 | No  |
| ENSMUSG00000023755 | -1,11E-01 | 2,299112532  | 6,35E-01 | 4,25E-01 | 7,20E-01 | Rhebl1        | 0,93 | No  |
| ENSMUSG00000023764 | -2,46E-01 | 4,513775531  | 9,65E+00 | 1,90E-03 | 2,69E-02 | Sfi1          | 0,84 | Yes |
| ENSMUSG00000023781 | 6,32E-01  | -2,126825472 | 6,95E-01 | 4,04E-01 | 7,02E-01 | Hes7          | 1,55 | No  |
| ENSMUSG00000023791 | -7,06E-03 | 4,830161875  | 8,60E-03 | 9,26E-01 | 1,00E+00 | Pigx          | 1,00 | No  |
| ENSMUSG00000023795 | -4,12E-01 | 1,542641551  | 5,59E+00 | 1,81E-02 | 1,41E-01 | Pisd-ps2      | 0,75 | No  |
| ENSMUSG00000023800 | 1,32E-01  | 3,620164504  | 1,88E+00 | 1,71E-01 | 5,26E-01 | Tiam2         | 1,10 | No  |
| ENSMUSG00000023805 | 1,29E-01  | 6,119174894  | 3,92E+00 | 4,76E-02 | 2,61E-01 | Synj2         | 1,09 | No  |
| ENSMUSG00000023806 | -2,43E-03 | 4,110177156  | 7,86E-04 | 9,78E-01 | 1,00E+00 | Rsph3b        | 1,00 | No  |
| ENSMUSG00000023809 | -8,01E-02 | 6,061818786  | 1,52E+00 | 2,18E-01 | 5,50E-01 | Rps6ka2       | 0,95 | No  |
| ENSMUSG00000023826 | -2,44E-01 | -1,247147882 | 2,36E-01 | 6,27E-01 | 8,61E-01 | Park2         | 0,84 | No  |
| ENSMUSG00000023827 | 1,78E-01  | 4,703003344  | 5,21E+00 | 2,25E-02 | 1,63E-01 | Agpat4        | 1,13 | No  |
| ENSMUSG00000023829 | 2,62E+00  | -3,033654625 | 2,66E+00 | 1,03E-01 | 3,95E-01 | Slc22a1       | 6,16 | No  |
| ENSMUSG00000023830 | 3,08E-01  | 7,94252008   | 2,78E+01 | 1,37E-07 | 7,36E-06 | Igf2r         | 1,24 | Yes |
| ENSMUSG00000023832 | 5,74E-03  | 5,451202535  | 6,91E-03 | 9,34E-01 | 1,00E+00 | Acat2         | 1,00 | No  |
| ENSMUSG00000023845 | 4,89E-02  | 7,204306075  | 6,62E-01 | 4,16E-01 | 7,11E-01 | Lnpep         | 1,03 | No  |
| ENSMUSG00000023852 | -3,20E-02 | 6,692421895  | 2,67E-01 | 6,05E-01 | 8,49E-01 | Chd1          | 0,98 | No  |
| ENSMUSG00000023861 | 2,31E-02  | 5,079472165  | 9,92E-02 | 7,53E-01 | 9,33E-01 | Mpc1          | 1,02 | No  |
| ENSMUSG00000023868 | -5,82E-02 | -1,740726957 | 9,47E-03 | 9,22E-01 | 1,00E+00 | Pde10a        | 0,96 | No  |
| ENSMUSG00000023873 | 4,42E-01  | 0,843755069  | 3,67E+00 | 5,54E-02 | 2,88E-01 | 1700010I14Rik | 1,36 | No  |
| ENSMUSG00000023882 | 5,02E-01  | 1,483487845  | 7,95E+00 | 4,81E-03 | 5,43E-02 | Zfp54         | 1,42 | No  |
| ENSMUSG00000023883 | -1,21E-02 | 5,382801421  | 2,97E-02 | 8,63E-01 | 9,97E-01 | Phf10         | 0,99 | No  |
| ENSMUSG00000023885 | -1,86E+00 | -2,963227946 | 1,40E+00 | 2,36E-01 | 5,50E-01 | Thbs2         | 0,28 | No  |
| ENSMUSG00000023886 | -2,70E+00 | -3,033614577 | 2,89E+00 | 8,93E-02 | 3,79E-01 | Smoc2         | 0,15 | No  |
| ENSMUSG00000023892 | -2,66E-01 | 3,728322499  | 7,86E+00 | 5,04E-03 | 5,63E-02 | Zfp51         | 0,83 | No  |
| ENSMUSG00000023902 | -2,63E-02 | -3,033641358 | 2,33E-04 | 9,88E-01 | 1,00E+00 | Zscan10       | 0,98 | No  |
| ENSMUSG00000023903 | -7,39E-01 | 6,312075358  | 1,35E+02 | 2,75E-31 | 1,72E-28 | Mmp25         | 0,60 | Yes |
| ENSMUSG00000023904 | -6,33E-02 | 5,53309118   | 8,51E-01 | 3,56E-01 | 6,57E-01 | Hcfc1r1       | 0,96 | No  |
| ENSMUSG00000023905 | 3,99E-01  | 2,910428817  | 1,12E+01 | 8,21E-04 | 1,37E-02 | Tnfrsf12a     | 1,32 | Yes |
| ENSMUSG00000023908 | 1,76E-01  | 4,962121905  | 5,51E+00 | 1,89E-02 | 1,46E-01 | Pkmyt1        | 1,13 | No  |
| ENSMUSG00000023909 | 2,58E-01  | 4,866001424  | 1,15E+01 | 7,10E-04 | 1,22E-02 | Paqr4         | 1,20 | Yes |
| ENSMUSG00000023911 | -4,17E-01 | 1,105749305  | 4,04E+00 | 4,45E-02 | 2,51E-01 | Flywch2       | 0,75 | No  |

|                    |           |              |          |          |          |          |      |     |
|--------------------|-----------|--------------|----------|----------|----------|----------|------|-----|
| ENSMUSG00000023912 | -3,98E-01 | -0,246964495 | 1,60E+00 | 2,06E-01 | 5,50E-01 | Slc25a27 | 0,76 | No  |
| ENSMUSG00000023913 | -5,31E-02 | 8,274074934  | 8,44E-01 | 3,58E-01 | 6,60E-01 | Pla2g7   | 0,96 | No  |
| ENSMUSG00000023914 | 3,04E-01  | -0,816585065 | 6,11E-01 | 4,35E-01 | 7,27E-01 | Mep1a    | 1,23 | No  |
| ENSMUSG00000023915 | 4,14E-01  | 6,048627976  | 4,01E+01 | 2,47E-10 | 2,20E-08 | Tnfrsf21 | 1,33 | Yes |
| ENSMUSG00000023918 | 1,92E+00  | -2,655179137 | 2,75E+00 | 9,72E-02 | 3,89E-01 | Adgrf4   | 3,78 | No  |
| ENSMUSG00000023919 | 2,69E-01  | 3,730238284  | 8,11E+00 | 4,40E-03 | 5,07E-02 | Cenpq    | 1,21 | No  |
| ENSMUSG00000023921 | 1,09E-01  | 4,982580617  | 2,17E+00 | 1,41E-01 | 4,74E-01 | Mut      | 1,08 | No  |
| ENSMUSG00000023923 | 1,33E-01  | 6,052131969  | 4,15E+00 | 4,16E-02 | 2,42E-01 | Tbc1d5   | 1,10 | No  |
| ENSMUSG00000023926 | -5,99E-01 | -2,832013989 | 2,83E-01 | 5,95E-01 | 8,44E-01 | Rhag     | 0,66 | No  |
| ENSMUSG00000023927 | -8,50E-01 | 0,527458898  | 1,20E+01 | 5,27E-04 | 9,57E-03 | Satb1    | 0,55 | Yes |
| ENSMUSG00000023930 | 2,64E+00  | -2,963257704 | 2,69E+00 | 1,01E-01 | 3,92E-01 | Crisp2   | 6,23 | No  |
| ENSMUSG00000023931 | -8,69E-01 | -2,963204587 | 4,16E-01 | 5,19E-01 | 7,98E-01 | Efhb     | 0,55 | No  |
| ENSMUSG00000023932 | 9,77E-02  | 4,928317002  | 1,72E+00 | 1,90E-01 | 5,50E-01 | Cdc5l    | 1,07 | No  |
| ENSMUSG00000023935 | -1,53E+00 | -1,711587635 | 7,05E+00 | 7,92E-03 | 7,84E-02 | Spats1   | 0,35 | No  |
| ENSMUSG00000023938 | 1,09E-04  | 3,395937024  | 1,13E-06 | 9,99E-01 | 1,00E+00 | Aars2    | 1,00 | No  |
| ENSMUSG00000023939 | -1,48E-01 | 4,26238544   | 3,13E+00 | 7,67E-02 | 3,53E-01 | Mrpl14   | 0,90 | No  |
| ENSMUSG00000023940 | 1,45E-01  | 3,862648303  | 2,52E+00 | 1,12E-01 | 4,13E-01 | Sgo1     | 1,11 | No  |
| ENSMUSG00000023942 | 1,80E-01  | 6,36887268   | 8,01E+00 | 4,66E-03 | 5,29E-02 | Slc29a1  | 1,13 | No  |
| ENSMUSG00000023944 | -6,82E-02 | 10,38508135  | 1,48E+00 | 2,24E-01 | 5,50E-01 | Hsp90ab1 | 0,95 | No  |
| ENSMUSG00000023947 | -1,32E-01 | 6,32446625   | 4,35E+00 | 3,69E-02 | 2,28E-01 | Nfkbie   | 0,91 | No  |
| ENSMUSG00000023949 | -8,89E-01 | -0,48518482  | 7,28E+00 | 6,97E-03 | 7,16E-02 | Tcte1    | 0,54 | No  |
| ENSMUSG00000023951 | 5,83E-02  | 5,150089853  | 6,33E-01 | 4,26E-01 | 7,20E-01 | Vegfa    | 1,04 | No  |
| ENSMUSG00000023952 | -2,40E-01 | 6,771244594  | 1,53E+01 | 9,22E-05 | 2,26E-03 | Gtpbp2   | 0,85 | Yes |
| ENSMUSG00000023953 | 2,90E-01  | 4,058772536  | 1,11E+01 | 8,53E-04 | 1,42E-02 | Polh     | 1,22 | Yes |
| ENSMUSG00000023959 | -4,53E+00 | -2,355378183 | 1,16E+01 | 6,71E-04 | 1,16E-02 | Clic5    | 0,04 | Yes |
| ENSMUSG00000023960 | -3,43E-01 | -1,051756879 | 4,52E-01 | 5,01E-01 | 7,86E-01 | Enpp5    | 0,79 | No  |
| ENSMUSG00000023961 | 1,61E-01  | 0,358360356  | 4,23E-01 | 5,15E-01 | 7,97E-01 | Enpp4    | 1,12 | No  |
| ENSMUSG00000023963 | 3,05E-01  | -1,378381311 | 3,45E-01 | 5,57E-01 | 8,21E-01 | Cyp39a1  | 1,24 | No  |
| ENSMUSG00000023965 | -1,74E-02 | 5,12967993   | 5,69E-02 | 8,11E-01 | 9,67E-01 | Fbxl17   | 0,99 | No  |
| ENSMUSG00000023966 | -4,16E-01 | -0,460694544 | 1,49E+00 | 2,22E-01 | 5,50E-01 | Rsph9    | 0,75 | No  |
| ENSMUSG00000023967 | 2,40E-02  | 4,574762229  | 9,11E-02 | 7,63E-01 | 9,38E-01 | Mrps18a  | 1,02 | No  |
| ENSMUSG00000023968 | 2,55E+00  | -2,185647803 | 5,84E+00 | 1,57E-02 | 1,30E-01 | Crip3    | 5,84 | No  |

|                    |           |              |          |          |          |         |      |     |
|--------------------|-----------|--------------|----------|----------|----------|---------|------|-----|
| ENSMUSG00000023971 | -7,42E-02 | 4,439852196  | 8,44E-01 | 3,58E-01 | 6,60E-01 | Rrp36   | 0,95 | No  |
| ENSMUSG00000023972 | -5,68E-01 | -1,070048049 | 1,60E+00 | 2,05E-01 | 5,50E-01 | Ptk7    | 0,67 | No  |
| ENSMUSG00000023973 | 4,49E-03  | 6,900645212  | 5,42E-03 | 9,41E-01 | 1,00E+00 | Cnpy3   | 1,00 | No  |
| ENSMUSG00000023977 | -2,10E-02 | 6,71888449   | 1,16E-01 | 7,34E-01 | 9,23E-01 | Ubr2    | 0,99 | No  |
| ENSMUSG00000023978 | -3,88E-03 | -3,03362684  | 4,02E-12 | 1,00E+00 | 1,00E+00 | Prph2   | 1,00 | No  |
| ENSMUSG00000023979 | -7,07E-02 | -0,344386693 | 4,85E-02 | 8,26E-01 | 9,74E-01 | Guca1b  | 0,95 | No  |
| ENSMUSG00000023980 | -1,07E-01 | 4,443425407  | 1,78E+00 | 1,83E-01 | 5,45E-01 | Taf8    | 0,93 | No  |
| ENSMUSG00000023982 | 2,48E-01  | 3,136830583  | 5,17E+00 | 2,30E-02 | 1,65E-01 | Guca1a  | 1,19 | No  |
| ENSMUSG00000023984 | 1,04E-01  | 3,336309252  | 1,03E+00 | 3,10E-01 | 6,08E-01 | Gm20517 | 1,07 | No  |
| ENSMUSG00000023987 | 2,64E+00  | -3,033673223 | 2,69E+00 | 1,01E-01 | 3,92E-01 | Pgc     | 6,23 | No  |
| ENSMUSG00000023988 | 9,56E-02  | 5,563193306  | 1,94E+00 | 1,64E-01 | 5,15E-01 | Bysl    | 1,07 | No  |
| ENSMUSG00000023990 | 1,51E-01  | 5,781610397  | 5,04E+00 | 2,47E-02 | 1,74E-01 | Tfeb    | 1,11 | No  |
| ENSMUSG00000023991 | -4,54E-01 | 5,860281416  | 4,70E+01 | 6,96E-12 | 7,53E-10 | Foxp4   | 0,73 | Yes |
| ENSMUSG00000023992 | 1,87E-01  | 6,980415706  | 9,38E+00 | 2,20E-03 | 3,01E-02 | Trem2   | 1,14 | Yes |
| ENSMUSG00000023993 | 2,96E-01  | 0,655221466  | 1,63E+00 | 2,01E-01 | 5,50E-01 | Trem11  | 1,23 | No  |
| ENSMUSG00000023994 | -2,55E-02 | 7,233815716  | 1,82E-01 | 6,69E-01 | 8,88E-01 | Nfya    | 0,98 | No  |
| ENSMUSG00000024002 | 5,79E-02  | 7,20398153   | 9,29E-01 | 3,35E-01 | 6,36E-01 | Brd4    | 1,04 | No  |
| ENSMUSG00000024006 | 1,27E-01  | 7,009308755  | 4,41E+00 | 3,56E-02 | 2,24E-01 | Stk38   | 1,09 | No  |
| ENSMUSG00000024007 | 1,21E-01  | 5,03952757   | 2,67E+00 | 1,02E-01 | 3,94E-01 | Ppil1   | 1,09 | No  |
| ENSMUSG00000024008 | -7,75E-02 | 0,136337386  | 7,46E-02 | 7,85E-01 | 9,51E-01 | Cpne5   | 0,95 | No  |
| ENSMUSG00000024011 | 1,09E-01  | 0,655517507  | 2,07E-01 | 6,49E-01 | 8,75E-01 | Pi16    | 1,08 | No  |
| ENSMUSG00000024012 | 7,92E-02  | 6,736347515  | 1,65E+00 | 1,99E-01 | 5,50E-01 | Mtch1   | 1,06 | No  |
| ENSMUSG00000024013 | 2,13E-01  | 5,721109218  | 9,89E+00 | 1,67E-03 | 2,42E-02 | Fgd2    | 1,16 | Yes |
| ENSMUSG00000024014 | -3,48E-02 | 9,082742713  | 3,75E-01 | 5,40E-01 | 8,10E-01 | Pim1    | 0,98 | No  |
| ENSMUSG00000024018 | 1,75E-02  | 3,681286491  | 3,34E-02 | 8,55E-01 | 9,92E-01 | Ccdc167 | 1,01 | No  |
| ENSMUSG00000024019 | -9,23E-02 | 5,534886565  | 1,80E+00 | 1,80E-01 | 5,42E-01 | Cmtr1   | 0,94 | No  |
| ENSMUSG00000024026 | 1,26E-01  | 4,344930276  | 2,31E+00 | 1,29E-01 | 4,50E-01 | Glo1    | 1,09 | No  |
| ENSMUSG00000024029 | 1,87E+00  | -3,107639691 | 1,38E+00 | 2,40E-01 | 5,50E-01 | Tff3    | 3,67 | No  |
| ENSMUSG00000024030 | 2,95E-01  | 8,864467259  | 2,68E+01 | 2,24E-07 | 1,17E-05 | Abcg1   | 1,23 | Yes |
| ENSMUSG00000024032 | 3,08E-01  | -2,929288075 | 5,90E-02 | 8,08E-01 | 9,65E-01 | Tff1    | 1,24 | No  |
| ENSMUSG00000024033 | 2,08E-01  | -0,929406666 | 2,67E-01 | 6,05E-01 | 8,49E-01 | Rsph1   | 1,16 | No  |
| ENSMUSG00000024034 | 1,21E+00  | -2,896186976 | 9,04E-01 | 3,42E-01 | 6,42E-01 | Tmprss3 | 2,31 | No  |



|                    |           |              |          |          |          |          |      |     |
|--------------------|-----------|--------------|----------|----------|----------|----------|------|-----|
| ENSMUSG00000024036 | 2,77E-05  | 4,015982974  | 9,88E-08 | 1,00E+00 | 1,00E+00 | Slc37a1  | 1,00 | No  |
| ENSMUSG00000024037 | 8,58E-02  | 4,79436497   | 1,25E+00 | 2,63E-01 | 5,57E-01 | Wdr4     | 1,06 | No  |
| ENSMUSG00000024038 | -3,33E-02 | 5,887737767  | 2,54E-01 | 6,14E-01 | 8,53E-01 | Ndufv3   | 0,98 | No  |
| ENSMUSG00000024039 | -1,75E+00 | -2,655154493 | 2,12E+00 | 1,46E-01 | 4,83E-01 | Cbs      | 0,30 | No  |
| ENSMUSG00000024041 | -8,55E-01 | -2,963271948 | 4,02E-01 | 5,26E-01 | 8,03E-01 | Cryaa    | 0,55 | No  |
| ENSMUSG00000024042 | 3,64E-01  | 4,120371123  | 1,78E+01 | 2,43E-05 | 7,33E-04 | Sik1     | 1,29 | Yes |
| ENSMUSG00000024043 | -9,25E-01 | 2,452719634  | 4,94E+01 | 2,05E-12 | 2,38E-10 | Arhgap28 | 0,53 | Yes |
| ENSMUSG00000024044 | 1,63E-01  | 4,312614376  | 3,82E+00 | 5,06E-02 | 2,73E-01 | Epb41l3  | 1,12 | No  |
| ENSMUSG00000024045 | -3,83E-02 | 6,42479775   | 3,70E-01 | 5,43E-01 | 8,12E-01 | Akap8    | 0,97 | No  |
| ENSMUSG00000024048 | -1,25E-01 | 8,427867315  | 4,75E+00 | 2,93E-02 | 1,95E-01 | Myl12a   | 0,92 | No  |
| ENSMUSG00000024049 | -4,30E-01 | -0,641423105 | 1,41E+00 | 2,35E-01 | 5,50E-01 | Myom1    | 0,74 | No  |
| ENSMUSG00000024050 | 6,21E-02  | 5,515961738  | 8,09E-01 | 3,68E-01 | 6,70E-01 | Wiz      | 1,04 | No  |
| ENSMUSG00000024052 | 6,03E-03  | 5,425133684  | 7,47E-03 | 9,31E-01 | 1,00E+00 | Lpin2    | 1,00 | No  |
| ENSMUSG00000024053 | 2,86E-01  | 8,591366186  | 2,47E+01 | 6,83E-07 | 3,17E-05 | Emilin2  | 1,22 | Yes |
| ENSMUSG00000024054 | -2,05E-03 | 6,62340886   | 1,08E-03 | 9,74E-01 | 1,00E+00 | Smchd1   | 1,00 | No  |
| ENSMUSG00000024055 | -5,78E-02 | 4,466527822  | 5,15E-01 | 4,73E-01 | 7,61E-01 | Cyp4f13  | 0,96 | No  |
| ENSMUSG00000024056 | 1,56E-01  | 4,093699024  | 3,21E+00 | 7,30E-02 | 3,43E-01 | Ndc80    | 1,11 | No  |
| ENSMUSG00000024059 | -3,95E-02 | -2,963274761 | 7,08E-04 | 9,79E-01 | 1,00E+00 | Clip4    | 0,97 | No  |
| ENSMUSG00000024063 | 3,09E-01  | 5,747868793  | 2,11E+01 | 4,36E-06 | 1,61E-04 | Lbh      | 1,24 | Yes |
| ENSMUSG00000024064 | -5,06E-01 | -0,311108783 | 2,35E+00 | 1,25E-01 | 4,42E-01 | Galnt14  | 0,70 | No  |
| ENSMUSG00000024065 | -1,03E+00 | -2,146074968 | 1,98E+00 | 1,59E-01 | 5,06E-01 | Ehd3     | 0,49 | No  |
| ENSMUSG00000024066 | -2,45E-03 | 5,894173006  | 1,36E-03 | 9,71E-01 | 1,00E+00 | Xdh      | 1,00 | No  |
| ENSMUSG00000024067 | -4,19E-02 | 3,901504704  | 2,12E-01 | 6,45E-01 | 8,73E-01 | Dpy30    | 0,97 | No  |
| ENSMUSG00000024068 | 1,19E-01  | 5,069949589  | 2,68E+00 | 1,01E-01 | 3,94E-01 | Spast    | 1,09 | No  |
| ENSMUSG00000024069 | 7,18E-02  | 3,124572272  | 4,29E-01 | 5,12E-01 | 7,95E-01 | Slc30a6  | 1,05 | No  |
| ENSMUSG00000024070 | 1,20E-01  | 7,451439769  | 4,09E+00 | 4,31E-02 | 2,47E-01 | Prkd3    | 1,09 | No  |
| ENSMUSG00000024072 | 7,67E-03  | 5,246404663  | 1,16E-02 | 9,14E-01 | 1,00E+00 | Yipf4    | 1,01 | No  |
| ENSMUSG00000024073 | 7,12E-02  | 7,991936289  | 1,50E+00 | 2,21E-01 | 5,50E-01 | Birc6    | 1,05 | No  |
| ENSMUSG00000024074 | 2,72E-01  | 2,298886204  | 3,82E+00 | 5,06E-02 | 2,73E-01 | Crim1    | 1,21 | No  |
| ENSMUSG00000024077 | 4,53E-02  | 6,55518678   | 5,26E-01 | 4,68E-01 | 7,57E-01 | Strn     | 1,03 | No  |
| ENSMUSG00000024078 | 1,58E-01  | 3,314440589  | 2,32E+00 | 1,27E-01 | 4,48E-01 | Ttc27    | 1,12 | No  |
| ENSMUSG00000024079 | 5,20E-02  | 5,851525507  | 6,18E-01 | 4,32E-01 | 7,25E-01 | Eif2ak2  | 1,04 | No  |

|                    |           |              |          |          |          |               |      |     |
|--------------------|-----------|--------------|----------|----------|----------|---------------|------|-----|
| ENSMUSG00000024081 | 4,90E-03  | 5,497870504  | 4,99E-03 | 9,44E-01 | 1,00E+00 | Cebpz         | 1,00 | No  |
| ENSMUSG00000024082 | 4,27E-02  | 3,542419775  | 1,88E-01 | 6,65E-01 | 8,85E-01 | Ndufaf7       | 1,03 | No  |
| ENSMUSG00000024083 | 6,90E-02  | 6,091995446  | 1,13E+00 | 2,87E-01 | 5,83E-01 | Pja2          | 1,05 | No  |
| ENSMUSG00000024084 | 1,12E-01  | 6,403621569  | 3,16E+00 | 7,56E-02 | 3,50E-01 | Qpct          | 1,08 | No  |
| ENSMUSG00000024085 | 6,89E-03  | 6,957830861  | 1,28E-02 | 9,10E-01 | 1,00E+00 | Man2a1        | 1,00 | No  |
| ENSMUSG00000024087 | -2,61E+00 | 3,929590021  | 6,74E+02 | #####    | #####    | Cyp1b1        | 0,16 | Yes |
| ENSMUSG00000024091 | 3,10E-02  | 6,55695565   | 2,45E-01 | 6,20E-01 | 8,57E-01 | Vapa          | 1,02 | No  |
| ENSMUSG00000024095 | -2,80E-01 | 8,124201171  | 2,32E+01 | 1,43E-06 | 6,08E-05 | Hnrnpll       | 0,82 | Yes |
| ENSMUSG00000024096 | -2,02E-02 | 6,990504431  | 1,11E-01 | 7,39E-01 | 9,26E-01 | Ralbp1        | 0,99 | No  |
| ENSMUSG00000024097 | -1,47E-01 | 6,648205762  | 5,59E+00 | 1,81E-02 | 1,41E-01 | Srsf7         | 0,90 | No  |
| ENSMUSG00000024098 | -8,78E-02 | 6,416075935  | 1,94E+00 | 1,64E-01 | 5,15E-01 | Twsg1         | 0,94 | No  |
| ENSMUSG00000024099 | -8,39E-02 | 5,48402016   | 1,46E+00 | 2,26E-01 | 5,50E-01 | Ndufv2        | 0,94 | No  |
| ENSMUSG00000024101 | -1,94E-01 | 5,455439007  | 7,87E+00 | 5,02E-03 | 5,61E-02 | Washc1        | 0,87 | No  |
| ENSMUSG00000024104 | -2,32E-01 | 7,72761497   | 1,57E+01 | 7,44E-05 | 1,89E-03 | Washc2        | 0,85 | Yes |
| ENSMUSG00000024105 | 1,87E+00  | -3,107639691 | 1,38E+00 | 2,40E-01 | 5,50E-01 | Themis3       | 3,67 | No  |
| ENSMUSG00000024107 | -2,68E+00 | -3,033645766 | 2,84E+00 | 9,17E-02 | 3,82E-01 | Lhcgr         | 0,16 | No  |
| ENSMUSG00000024109 | -8,91E-01 | -1,901667637 | 1,81E+00 | 1,78E-01 | 5,39E-01 | Nrxn1         | 0,54 | No  |
| ENSMUSG00000024112 | -1,87E+00 | -3,107637761 | 1,39E+00 | 2,38E-01 | 5,50E-01 | Cacna1h       | 0,27 | No  |
| ENSMUSG00000024116 | -2,65E+00 | -3,033633091 | 2,78E+00 | 9,55E-02 | 3,86E-01 | Prss21        | 0,16 | No  |
| ENSMUSG00000024118 | 1,34E-01  | 2,888426842  | 1,32E+00 | 2,50E-01 | 5,50E-01 | 1600002H07Rik | 1,10 | No  |
| ENSMUSG00000024120 | 1,01E-01  | 5,565508043  | 2,16E+00 | 1,42E-01 | 4,76E-01 | Lrprrc        | 1,07 | No  |
| ENSMUSG00000024121 | -1,83E-02 | 8,277659409  | 1,00E-01 | 7,52E-01 | 9,32E-01 | Atp6v0c       | 0,99 | No  |
| ENSMUSG00000024122 | 8,61E-03  | 6,821429121  | 1,97E-02 | 8,88E-01 | 1,00E+00 | Pdpk1         | 1,01 | No  |
| ENSMUSG00000024124 | -5,05E-01 | -0,26789786  | 2,40E+00 | 1,21E-01 | 4,34E-01 | Prss30        | 0,70 | No  |
| ENSMUSG00000024127 | 2,53E-02  | 4,18750641   | 8,70E-02 | 7,68E-01 | 9,41E-01 | Prepl         | 1,02 | No  |
| ENSMUSG00000024130 | -3,02E-02 | 7,129181947  | 2,51E-01 | 6,16E-01 | 8,54E-01 | Abca3         | 0,98 | No  |
| ENSMUSG00000024131 | -2,28E-01 | 0,313171752  | 7,42E-01 | 3,89E-01 | 6,89E-01 | Slc3a1        | 0,85 | No  |
| ENSMUSG00000024132 | -3,42E-01 | 2,324599838  | 6,37E+00 | 1,16E-02 | 1,04E-01 | Eci1          | 0,79 | No  |
| ENSMUSG00000024135 | 1,77E-01  | 3,965813985  | 3,94E+00 | 4,72E-02 | 2,60E-01 | Srbd1         | 1,13 | No  |
| ENSMUSG00000024136 | 2,95E-01  | -0,117306177 | 8,02E-01 | 3,70E-01 | 6,72E-01 | Dnase1l2      | 1,23 | No  |
| ENSMUSG00000024137 | 2,70E-02  | 4,472976894  | 1,13E-01 | 7,37E-01 | 9,25E-01 | E4f1          | 1,02 | No  |
| ENSMUSG00000024140 | 1,37E-02  | 2,620808779  | 1,15E-02 | 9,14E-01 | 1,00E+00 | Epas1         | 1,01 | No  |

|                    |           |              |          |          |          |           |      |     |
|--------------------|-----------|--------------|----------|----------|----------|-----------|------|-----|
| ENSMUSG00000024142 | 1,66E-01  | 4,171963361  | 3,80E+00 | 5,13E-02 | 2,75E-01 | Mlst8     | 1,12 | No  |
| ENSMUSG00000024143 | 2,11E-01  | 6,589375708  | 1,15E+01 | 7,02E-04 | 1,21E-02 | Rhoq      | 1,16 | Yes |
| ENSMUSG00000024145 | 7,04E-02  | 3,750074192  | 5,62E-01 | 4,54E-01 | 7,43E-01 | Pigf      | 1,05 | No  |
| ENSMUSG00000024146 | 8,69E-02  | 5,086748229  | 1,42E+00 | 2,34E-01 | 5,50E-01 | Cript     | 1,06 | No  |
| ENSMUSG00000024150 | 6,59E-02  | 6,186611141  | 1,05E+00 | 3,05E-01 | 6,02E-01 | Mcfd2     | 1,05 | No  |
| ENSMUSG00000024151 | 2,40E-02  | 4,664991908  | 9,57E-02 | 7,57E-01 | 9,35E-01 | Msh2      | 1,02 | No  |
| ENSMUSG00000024155 | -1,06E-01 | -3,033634182 | 5,86E-03 | 9,39E-01 | 1,00E+00 | Meiob     | 0,93 | No  |
| ENSMUSG00000024158 | 4,97E-02  | 4,020784691  | 3,09E-01 | 5,78E-01 | 8,36E-01 | Hagh      | 1,04 | No  |
| ENSMUSG00000024160 | 1,03E-01  | 4,753574503  | 1,78E+00 | 1,82E-01 | 5,45E-01 | Spsb3     | 1,07 | No  |
| ENSMUSG00000024163 | -7,36E-02 | 7,181128217  | 1,51E+00 | 2,20E-01 | 5,50E-01 | Mapk8ip3  | 0,95 | No  |
| ENSMUSG00000024164 | -5,73E-02 | 8,19987797   | 9,77E-01 | 3,23E-01 | 6,23E-01 | C3        | 0,96 | No  |
| ENSMUSG00000024165 | 1,45E-01  | 6,183702506  | 5,05E+00 | 2,46E-02 | 1,73E-01 | Hn1l      | 1,11 | No  |
| ENSMUSG00000024168 | -2,44E-01 | -0,726236549 | 4,43E-01 | 5,06E-01 | 7,90E-01 | Tmem204   | 0,84 | No  |
| ENSMUSG00000024169 | -6,02E-02 | 5,511689     | 7,64E-01 | 3,82E-01 | 6,83E-01 | lft140    | 0,96 | No  |
| ENSMUSG00000024170 | 1,43E-01  | 3,609622274  | 2,20E+00 | 1,38E-01 | 4,70E-01 | Telo2     | 1,10 | No  |
| ENSMUSG00000024174 | -7,56E-02 | 4,456075495  | 8,91E-01 | 3,45E-01 | 6,46E-01 | Pot1b     | 0,95 | No  |
| ENSMUSG00000024175 | 7,31E-01  | -2,963279337 | 2,91E-01 | 5,90E-01 | 8,41E-01 | Tekt4     | 1,66 | No  |
| ENSMUSG00000024177 | -1,50E-01 | 0,5694001    | 3,89E-01 | 5,33E-01 | 8,06E-01 | Nme4      | 0,90 | No  |
| ENSMUSG00000024180 | -7,12E-01 | 5,779381763  | 1,14E+02 | 1,03E-26 | 4,13E-24 | Tmem8     | 0,61 | Yes |
| ENSMUSG00000024181 | 9,24E-02  | 5,45044119   | 1,76E+00 | 1,85E-01 | 5,49E-01 | Mrpl28    | 1,07 | No  |
| ENSMUSG00000024182 | -9,33E-02 | 5,873489995  | 1,98E+00 | 1,59E-01 | 5,07E-01 | Axin1     | 0,94 | No  |
| ENSMUSG00000024184 | -1,24E+00 | -2,998030423 | 7,19E-01 | 3,97E-01 | 6,97E-01 | Pdia2     | 0,42 | No  |
| ENSMUSG00000024186 | 1,86E-01  | 2,760000622  | 2,43E+00 | 1,19E-01 | 4,29E-01 | Rgs11     | 1,14 | No  |
| ENSMUSG00000024187 | 3,28E-02  | 5,937110412  | 2,47E-01 | 6,19E-01 | 8,56E-01 | Fam234a   | 1,02 | No  |
| ENSMUSG00000024188 | -5,88E-02 | 6,065317527  | 8,20E-01 | 3,65E-01 | 6,66E-01 | Luc7l     | 0,96 | No  |
| ENSMUSG00000024190 | 2,91E-01  | 7,526738237  | 2,37E+01 | 1,12E-06 | 4,91E-05 | Dusp1     | 1,22 | Yes |
| ENSMUSG00000024191 | 7,87E-02  | 4,463021153  | 9,26E-01 | 3,36E-01 | 6,37E-01 | Bnip1     | 1,06 | No  |
| ENSMUSG00000024193 | -1,19E-01 | 3,727744402  | 1,63E+00 | 2,02E-01 | 5,50E-01 | Phf1      | 0,92 | No  |
| ENSMUSG00000024194 | 9,08E-04  | 5,26071198   | 1,60E-04 | 9,90E-01 | 1,00E+00 | Cuta      | 1,00 | No  |
| ENSMUSG00000024197 | 9,85E-02  | 7,179847189  | 2,69E+00 | 1,01E-01 | 3,93E-01 | Plin3     | 1,07 | No  |
| ENSMUSG00000024201 | -2,28E-03 | 5,374045597  | 1,05E-03 | 9,74E-01 | 1,00E+00 | Kdm4b     | 1,00 | No  |
| ENSMUSG00000024205 | -1,99E-01 | 5,990297121  | 9,24E+00 | 2,37E-03 | 3,21E-02 | Rpl36-ps2 | 0,87 | Yes |

|                    |           |              |          |          |          |               |      |     |
|--------------------|-----------|--------------|----------|----------|----------|---------------|------|-----|
| ENSMUSG00000024206 | 5,12E-01  | 1,278696044  | 7,04E+00 | 7,98E-03 | 7,88E-02 | Rfx2          | 1,43 | No  |
| ENSMUSG00000024207 | 1,85E+00  | -3,107657832 | 1,35E+00 | 2,46E-01 | 5,50E-01 | Acsbg2        | 3,61 | No  |
| ENSMUSG00000024208 | -3,93E-02 | 3,003894115  | 1,19E-01 | 7,30E-01 | 9,21E-01 | Uqcc2         | 0,97 | No  |
| ENSMUSG00000024209 | -5,74E-02 | 1,977974862  | 1,46E-01 | 7,03E-01 | 9,06E-01 | 1700061G19Rik | 0,96 | No  |
| ENSMUSG00000024210 | -9,89E-01 | 0,019599898  | 1,17E+01 | 6,25E-04 | 1,10E-02 | Ip6k3         | 0,50 | Yes |
| ENSMUSG00000024211 | -1,90E+00 | -3,033647263 | 1,44E+00 | 2,30E-01 | 5,50E-01 | Grm8          | 0,27 | No  |
| ENSMUSG00000024212 | 2,97E-02  | 5,284247281  | 1,75E-01 | 6,76E-01 | 8,91E-01 | Mllt1         | 1,02 | No  |
| ENSMUSG00000024213 | 3,79E-03  | 6,257392269  | 3,52E-03 | 9,53E-01 | 1,00E+00 | Nudt3         | 1,00 | No  |
| ENSMUSG00000024215 | -8,07E-01 | -2,033542072 | 9,50E-01 | 3,30E-01 | 6,30E-01 | Spdef         | 0,57 | No  |
| ENSMUSG00000024217 | -4,66E-02 | 3,481477843  | 2,20E-01 | 6,39E-01 | 8,69E-01 | Snrpc         | 0,97 | No  |
| ENSMUSG00000024218 | -1,50E-01 | 4,564021105  | 3,58E+00 | 5,86E-02 | 2,99E-01 | Taf11         | 0,90 | No  |
| ENSMUSG00000024219 | -8,83E-03 | 5,441373274  | 1,60E-02 | 8,99E-01 | 1,00E+00 | Anks1         | 0,99 | No  |
| ENSMUSG00000024220 | 5,31E-02  | 4,238874086  | 3,88E-01 | 5,33E-01 | 8,06E-01 | Zfp523        | 1,04 | No  |
| ENSMUSG00000024222 | 2,14E-01  | 6,020627577  | 1,07E+01 | 1,06E-03 | 1,70E-02 | Fkbp5         | 1,16 | Yes |
| ENSMUSG00000024223 | -2,71E+00 | -2,896162395 | 2,92E+00 | 8,76E-02 | 3,78E-01 | Armc12        | 0,15 | No  |
| ENSMUSG00000024227 | -2,66E+00 | -3,033639428 | 2,81E+00 | 9,35E-02 | 3,83E-01 | Pdzph1        | 0,16 | No  |
| ENSMUSG00000024228 | 7,70E-02  | 1,503759624  | 1,89E-01 | 6,63E-01 | 8,84E-01 | Nudt12        | 1,05 | No  |
| ENSMUSG00000024231 | -8,17E-02 | 5,236088717  | 1,30E+00 | 2,54E-01 | 5,50E-01 | Cul2          | 0,94 | No  |
| ENSMUSG00000024232 | -2,05E-01 | 1,595930945  | 1,50E+00 | 2,21E-01 | 5,50E-01 | Bambi         | 0,87 | No  |
| ENSMUSG00000024234 | 1,38E-02  | 5,096372393  | 3,58E-02 | 8,50E-01 | 9,89E-01 | Mtpap         | 1,01 | No  |
| ENSMUSG00000024235 | -6,93E-02 | 4,649406801  | 7,95E-01 | 3,73E-01 | 6,74E-01 | Map3k8        | 0,95 | No  |
| ENSMUSG00000024236 | 2,57E-01  | 7,412138216  | 1,86E+01 | 1,61E-05 | 5,12E-04 | Svil          | 1,20 | Yes |
| ENSMUSG00000024238 | -3,32E-01 | 4,507574476  | 1,76E+01 | 2,74E-05 | 8,11E-04 | Zeb1          | 0,79 | Yes |
| ENSMUSG00000024240 | 3,33E-02  | 5,201541666  | 2,17E-01 | 6,41E-01 | 8,71E-01 | Epc1          | 1,02 | No  |
| ENSMUSG00000024241 | 8,85E-02  | 4,982881142  | 1,42E+00 | 2,33E-01 | 5,50E-01 | Sos1          | 1,06 | No  |
| ENSMUSG00000024242 | -4,34E-02 | 4,165126371  | 2,50E-01 | 6,17E-01 | 8,55E-01 | Map4k3        | 0,97 | No  |
| ENSMUSG00000024245 | -1,25E+00 | -2,070096188 | 3,21E+00 | 7,34E-02 | 3,44E-01 | Tmem178       | 0,42 | No  |
| ENSMUSG00000024246 | 3,26E-01  | 1,938800524  | 4,49E+00 | 3,42E-02 | 2,18E-01 | Thumpd2       | 1,25 | No  |
| ENSMUSG00000024247 | 2,09E-01  | 5,431280619  | 9,05E+00 | 2,63E-03 | 3,46E-02 | Pkdcc         | 1,16 | Yes |
| ENSMUSG00000024248 | -1,67E-01 | 7,699681384  | 8,06E+00 | 4,53E-03 | 5,18E-02 | Cox7a2l       | 0,89 | No  |
| ENSMUSG00000024251 | 4,29E-02  | 4,661801615  | 3,03E-01 | 5,82E-01 | 8,38E-01 | Thada         | 1,03 | No  |
| ENSMUSG00000024253 | 1,13E+00  | -1,268193694 | 5,37E+00 | 2,05E-02 | 1,54E-01 | Dync2li1      | 2,19 | No  |

|                    |           |              |          |          |          |               |      |     |
|--------------------|-----------|--------------|----------|----------|----------|---------------|------|-----|
| ENSMUSG00000024254 | -1,89E+00 | -3,1076441   | 1,42E+00 | 2,33E-01 | 5,50E-01 | Abcg8         | 0,27 | No  |
| ENSMUSG00000024258 | 9,54E-02  | 4,584243118  | 1,44E+00 | 2,30E-01 | 5,50E-01 | Polr2d        | 1,07 | No  |
| ENSMUSG00000024259 | 1,14E-01  | 5,783043252  | 2,89E+00 | 8,93E-02 | 3,79E-01 | Slc25a46      | 1,08 | No  |
| ENSMUSG00000024260 | 9,36E-02  | 5,517935045  | 1,85E+00 | 1,73E-01 | 5,30E-01 | Sap130        | 1,07 | No  |
| ENSMUSG00000024268 | -2,89E-01 | -0,117152432 | 9,49E-01 | 3,30E-01 | 6,30E-01 | Celf4         | 0,82 | No  |
| ENSMUSG00000024269 | 2,41E-01  | 3,026445467  | 4,63E+00 | 3,14E-02 | 2,05E-01 | Tpgs2         | 1,18 | No  |
| ENSMUSG00000024270 | 9,70E-02  | 5,732057189  | 2,08E+00 | 1,49E-01 | 4,90E-01 | Slc39a6       | 1,07 | No  |
| ENSMUSG00000024271 | -1,04E-02 | 5,564542511  | 2,30E-02 | 8,79E-01 | 1,00E+00 | Elp2          | 0,99 | No  |
| ENSMUSG00000024273 | -1,16E-01 | 2,894840098  | 1,01E+00 | 3,15E-01 | 6,16E-01 | 2700062C07Rik | 0,92 | No  |
| ENSMUSG00000024274 | 9,96E-02  | -0,627543907 | 7,83E-02 | 7,80E-01 | 9,48E-01 | Zscan30       | 1,07 | No  |
| ENSMUSG00000024276 | -1,11E-01 | 4,592378138  | 2,01E+00 | 1,56E-01 | 5,00E-01 | Zfp397        | 0,93 | No  |
| ENSMUSG00000024277 | -1,23E-01 | 6,951405767  | 4,11E+00 | 4,27E-02 | 2,46E-01 | Mapre2        | 0,92 | No  |
| ENSMUSG00000024283 | -6,45E-02 | 6,237637813  | 1,01E+00 | 3,14E-01 | 6,14E-01 | Wac           | 0,96 | No  |
| ENSMUSG00000024286 | 7,73E-02  | 7,314885552  | 1,67E+00 | 1,96E-01 | 5,50E-01 | Ccny          | 1,06 | No  |
| ENSMUSG00000024287 | 7,34E-02  | 4,793432226  | 9,24E-01 | 3,36E-01 | 6,37E-01 | Thoc1         | 1,05 | No  |
| ENSMUSG00000024290 | 6,84E-02  | 6,543337003  | 1,19E+00 | 2,75E-01 | 5,71E-01 | Rock1         | 1,05 | No  |
| ENSMUSG00000024292 | 1,87E+00  | -3,107639691 | 1,38E+00 | 2,40E-01 | 5,50E-01 | Cyp4f14       | 3,67 | No  |
| ENSMUSG00000024293 | -2,92E-02 | 5,320524834  | 1,70E-01 | 6,80E-01 | 8,93E-01 | Esco1         | 0,98 | No  |
| ENSMUSG00000024294 | 8,91E-02  | 7,339516237  | 2,23E+00 | 1,35E-01 | 4,63E-01 | Mib1          | 1,06 | No  |
| ENSMUSG00000024295 | -2,86E-01 | -0,284075395 | 7,84E-01 | 3,76E-01 | 6,77E-01 | Cyp4f41-ps    | 0,82 | No  |
| ENSMUSG00000024298 | -1,70E-02 | 6,023137754  | 6,79E-02 | 7,94E-01 | 9,56E-01 | Zfp871        | 0,99 | No  |
| ENSMUSG00000024299 | 1,98E-01  | 5,834333437  | 8,78E+00 | 3,05E-03 | 3,87E-02 | Adamts10      | 1,15 | Yes |
| ENSMUSG00000024300 | 1,02E-01  | 9,02878883   | 3,24E+00 | 7,21E-02 | 3,40E-01 | Myo1f         | 1,07 | No  |
| ENSMUSG00000024301 | 2,74E-01  | 3,853249751  | 8,95E+00 | 2,78E-03 | 3,61E-02 | Kifc5b        | 1,21 | Yes |
| ENSMUSG00000024302 | -1,94E+00 | -3,107619243 | 1,50E+00 | 2,21E-01 | 5,50E-01 | Dtna          | 0,26 | No  |
| ENSMUSG00000024304 | -5,95E-01 | 3,321745596  | 3,48E+01 | 3,65E-09 | 2,72E-07 | Cdh2          | 0,66 | Yes |
| ENSMUSG00000024308 | -6,38E-02 | 8,396789129  | 1,23E+00 | 2,67E-01 | 5,64E-01 | Tapbp         | 0,96 | No  |
| ENSMUSG00000024309 | -1,72E-01 | 4,351433629  | 4,26E+00 | 3,90E-02 | 2,34E-01 | Pfdn6         | 0,89 | No  |
| ENSMUSG00000024312 | 6,80E-02  | 4,269971023  | 6,52E-01 | 4,20E-01 | 7,15E-01 | Wdr46         | 1,05 | No  |
| ENSMUSG00000024317 | 9,97E-02  | 3,945294812  | 1,22E+00 | 2,69E-01 | 5,66E-01 | Rnf138        | 1,07 | No  |
| ENSMUSG00000024319 | 3,38E-02  | 5,991587075  | 2,66E-01 | 6,06E-01 | 8,50E-01 | Vps52         | 1,02 | No  |
| ENSMUSG00000024325 | -5,05E-02 | 4,304329935  | 3,62E-01 | 5,47E-01 | 8,15E-01 | Ring1         | 0,97 | No  |

|                    |           |              |          |          |          |          |      |     |
|--------------------|-----------|--------------|----------|----------|----------|----------|------|-----|
| ENSMUSG00000024327 | 1,10E-01  | 6,124863643  | 2,90E+00 | 8,88E-02 | 3,79E-01 | Slc39a7  | 1,08 | No  |
| ENSMUSG00000024330 | 1,32E-01  | 1,302403955  | 5,04E-01 | 4,78E-01 | 7,65E-01 | Col11a2  | 1,10 | No  |
| ENSMUSG00000024331 | -3,57E+00 | -2,831967066 | 5,72E+00 | 1,68E-02 | 1,35E-01 | Dsc2     | 0,08 | No  |
| ENSMUSG00000024334 | -3,72E-01 | 4,651193038  | 2,29E+01 | 1,72E-06 | 7,15E-05 | H2-Oa    | 0,77 | Yes |
| ENSMUSG00000024335 | 2,23E-02  | 8,379570549  | 1,49E-01 | 6,99E-01 | 9,04E-01 | Brd2     | 1,02 | No  |
| ENSMUSG00000024338 | -2,71E-01 | 7,575474441  | 2,11E+01 | 4,28E-06 | 1,58E-04 | Psmb8    | 0,83 | Yes |
| ENSMUSG00000024339 | -5,65E-02 | 7,115416429  | 8,77E-01 | 3,49E-01 | 6,50E-01 | Tap2     | 0,96 | No  |
| ENSMUSG00000024340 | 6,90E-01  | -1,070165721 | 2,15E+00 | 1,43E-01 | 4,77E-01 | Btnl2    | 1,61 | No  |
| ENSMUSG00000024346 | -2,71E-02 | 4,787615376  | 1,25E-01 | 7,24E-01 | 9,18E-01 | Pfdn1    | 0,98 | No  |
| ENSMUSG00000024347 | 2,36E-01  | -2,070201642 | 7,00E-02 | 7,91E-01 | 9,55E-01 | Psd2     | 1,18 | No  |
| ENSMUSG00000024349 | 7,89E-02  | 7,539491471  | 1,78E+00 | 1,82E-01 | 5,44E-01 | Tmem173  | 1,06 | No  |
| ENSMUSG00000024350 | 8,24E-02  | 3,826954792  | 7,98E-01 | 3,72E-01 | 6,73E-01 | Dnajc18  | 1,06 | No  |
| ENSMUSG00000024352 | 3,36E-01  | 0,710622085  | 2,07E+00 | 1,50E-01 | 4,91E-01 | Spata24  | 1,26 | No  |
| ENSMUSG00000024353 | -2,18E-02 | -2,711703514 | 3,51E-04 | 9,85E-01 | 1,00E+00 | Mzb1     | 0,99 | No  |
| ENSMUSG00000024354 | -3,54E-01 | -0,366916067 | 1,18E+00 | 2,77E-01 | 5,73E-01 | Slc23a1  | 0,78 | No  |
| ENSMUSG00000024357 | -4,08E-03 | 3,891247458  | 1,99E-03 | 9,64E-01 | 1,00E+00 | Sil1     | 1,00 | No  |
| ENSMUSG00000024359 | 3,44E-03  | 7,486084584  | 3,36E-03 | 9,54E-01 | 1,00E+00 | Hspa9    | 1,00 | No  |
| ENSMUSG00000024360 | -7,07E-02 | 7,612436256  | 1,43E+00 | 2,31E-01 | 5,50E-01 | Etf1     | 0,95 | No  |
| ENSMUSG00000024365 | 1,17E+00  | -3,14612376  | 6,40E-01 | 4,24E-01 | 7,18E-01 | Cyp21a1  | 2,26 | No  |
| ENSMUSG00000024369 | -1,65E-01 | 4,991782386  | 4,95E+00 | 2,61E-02 | 1,81E-01 | Nelfe    | 0,89 | No  |
| ENSMUSG00000024370 | 2,26E-01  | 5,206666041  | 1,00E+01 | 1,57E-03 | 2,31E-02 | Cdc23    | 1,17 | Yes |
| ENSMUSG00000024371 | -4,56E-01 | 0,752998599  | 4,14E+00 | 4,19E-02 | 2,43E-01 | C2       | 0,73 | No  |
| ENSMUSG00000024376 | -8,51E-01 | -2,770645726 | 3,97E-01 | 5,28E-01 | 8,04E-01 | Epb41l4a | 0,55 | No  |
| ENSMUSG00000024378 | 2,90E-01  | 6,445624173  | 2,12E+01 | 4,04E-06 | 1,51E-04 | Stard4   | 1,22 | Yes |
| ENSMUSG00000024379 | -6,39E-01 | -2,401351322 | 5,57E-01 | 4,56E-01 | 7,45E-01 | Tslp     | 0,64 | No  |
| ENSMUSG00000024381 | 1,04E-01  | 6,302082846  | 2,65E+00 | 1,03E-01 | 3,95E-01 | Bin1     | 1,07 | No  |
| ENSMUSG00000024382 | 3,20E-02  | 5,598974698  | 2,21E-01 | 6,38E-01 | 8,69E-01 | Ercc3    | 1,02 | No  |
| ENSMUSG00000024383 | 5,27E-02  | 6,269375105  | 6,81E-01 | 4,09E-01 | 7,06E-01 | Map3k2   | 1,04 | No  |
| ENSMUSG00000024384 | 4,89E-02  | 5,718319634  | 5,24E-01 | 4,69E-01 | 7,57E-01 | lws1     | 1,03 | No  |
| ENSMUSG00000024387 | -8,90E-03 | 6,284369762  | 1,95E-02 | 8,89E-01 | 1,00E+00 | Csnk2b   | 0,99 | No  |
| ENSMUSG00000024388 | 1,85E+00  | -3,107657832 | 1,35E+00 | 2,46E-01 | 5,50E-01 | Myo7b    | 3,61 | No  |
| ENSMUSG00000024391 | -5,86E-01 | -1,711687261 | 9,50E-01 | 3,30E-01 | 6,30E-01 | Apom     | 0,67 | No  |

|                    |           |              |          |          |          |               |      |     |
|--------------------|-----------|--------------|----------|----------|----------|---------------|------|-----|
| ENSMUSG00000024392 | 1,27E-02  | 7,310510574  | 4,50E-02 | 8,32E-01 | 9,78E-01 | Bag6          | 1,01 | No  |
| ENSMUSG00000024393 | -7,84E-03 | 8,558505282  | 1,87E-02 | 8,91E-01 | 1,00E+00 | Prrc2a        | 0,99 | No  |
| ENSMUSG00000024395 | 1,51E-01  | -0,808830266 | 1,45E-01 | 7,04E-01 | 9,06E-01 | Lims2         | 1,11 | No  |
| ENSMUSG00000024397 | 1,41E-01  | 4,602605233  | 3,19E+00 | 7,42E-02 | 3,47E-01 | Aif1          | 1,10 | No  |
| ENSMUSG00000024399 | -5,38E-01 | 3,445621041  | 2,92E+01 | 6,36E-08 | 3,70E-06 | Ltb           | 0,69 | Yes |
| ENSMUSG00000024400 | 7,83E-02  | 5,549654532  | 1,29E+00 | 2,55E-01 | 5,50E-01 | Wdr33         | 1,06 | No  |
| ENSMUSG00000024401 | 2,30E-01  | 5,41529266   | 1,03E+01 | 1,31E-03 | 2,01E-02 | Tnf           | 1,17 | Yes |
| ENSMUSG00000024402 | -2,55E-01 | 4,427792686  | 9,76E+00 | 1,79E-03 | 2,56E-02 | Lta           | 0,84 | Yes |
| ENSMUSG00000024403 | -3,37E-01 | 2,410843125  | 6,62E+00 | 1,01E-02 | 9,40E-02 | Atp6v1g2      | 0,79 | No  |
| ENSMUSG00000024404 | -1,86E-01 | 8,3057534    | 1,04E+01 | 1,27E-03 | 1,96E-02 | Riok3         | 0,88 | Yes |
| ENSMUSG00000024409 | 7,31E-01  | -2,963267542 | 2,91E-01 | 5,90E-01 | 8,41E-01 | Psors1c2      | 1,66 | No  |
| ENSMUSG00000024410 | 1,63E-01  | 5,853641828  | 6,00E+00 | 1,43E-02 | 1,22E-01 | 3110002H16Rik | 1,12 | No  |
| ENSMUSG00000024413 | 2,01E-01  | 7,985637971  | 1,19E+01 | 5,69E-04 | 1,02E-02 | Npc1          | 1,15 | Yes |
| ENSMUSG00000024414 | 7,31E-03  | 4,287635027  | 7,57E-03 | 9,31E-01 | 1,00E+00 | Mrpl27        | 1,01 | No  |
| ENSMUSG00000024420 | 1,97E-01  | -1,473006293 | 1,08E-01 | 7,42E-01 | 9,27E-01 | Zfp521        | 1,15 | No  |
| ENSMUSG00000024421 | -6,07E-01 | -1,424882413 | 1,44E+00 | 2,30E-01 | 5,50E-01 | Lama3         | 0,66 | No  |
| ENSMUSG00000024422 | 7,36E-02  | 5,775971696  | 1,21E+00 | 2,72E-01 | 5,68E-01 | Dhx16         | 1,05 | No  |
| ENSMUSG00000024423 | -4,21E-02 | 6,120836965  | 4,23E-01 | 5,16E-01 | 7,97E-01 | Impact        | 0,97 | No  |
| ENSMUSG00000024424 | -2,75E-01 | 5,23886081   | 1,49E+01 | 1,15E-04 | 2,72E-03 | Ttc39c        | 0,83 | Yes |
| ENSMUSG00000024425 | -3,84E-02 | 6,195259343  | 3,57E-01 | 5,50E-01 | 8,17E-01 | Ndfip1        | 0,97 | No  |
| ENSMUSG00000024426 | -1,73E-01 | 2,469925414  | 1,89E+00 | 1,69E-01 | 5,24E-01 | Atat1         | 0,89 | No  |
| ENSMUSG00000024427 | -1,12E+00 | -0,998014654 | 6,23E+00 | 1,26E-02 | 1,11E-01 | Spry4         | 0,46 | No  |
| ENSMUSG00000024429 | -6,42E-02 | 5,899751885  | 9,36E-01 | 3,33E-01 | 6,34E-01 | Gnl1          | 0,96 | No  |
| ENSMUSG00000024430 | -4,77E-01 | 0,839736145  | 4,19E+00 | 4,06E-02 | 2,39E-01 | Cabyr         | 0,72 | No  |
| ENSMUSG00000024431 | 6,11E-02  | 6,461498779  | 9,51E-01 | 3,30E-01 | 6,30E-01 | Nr3c1         | 1,04 | No  |
| ENSMUSG00000024436 | -2,71E-02 | 3,620467568  | 7,89E-02 | 7,79E-01 | 9,47E-01 | Mrps18b       | 0,98 | No  |
| ENSMUSG00000024437 | 1,65E-01  | 4,919810632  | 4,83E+00 | 2,80E-02 | 1,89E-01 | Gm8615        | 1,12 | No  |
| ENSMUSG00000024442 | 2,11E-01  | 4,017365794  | 5,73E+00 | 1,67E-02 | 1,35E-01 | 0610009O20Rik | 1,16 | No  |
| ENSMUSG00000024446 | -2,48E-02 | 3,056132401  | 4,87E-02 | 8,25E-01 | 9,74E-01 | Rpp21         | 0,98 | No  |
| ENSMUSG00000024451 | 1,73E-02  | 3,035523287  | 2,42E-02 | 8,76E-01 | 1,00E+00 | Arap3         | 1,01 | No  |
| ENSMUSG00000024454 | -7,68E-02 | 5,142801073  | 1,13E+00 | 2,87E-01 | 5,83E-01 | Hdac3         | 0,95 | No  |
| ENSMUSG00000024456 | -3,16E-03 | 9,093214364  | 3,09E-03 | 9,56E-01 | 1,00E+00 | Diaph1        | 1,00 | No  |

|                    |           |              |           |          |          |         |      |     |
|--------------------|-----------|--------------|-----------|----------|----------|---------|------|-----|
| ENSMUSG00000024457 | -8,87E-02 | 6,075004629  | 1,87E+00  | 1,71E-01 | 5,27E-01 | Trim26  | 0,94 | No  |
| ENSMUSG00000024459 | 6,19E-01  | -2,311143536 | 4,27E-01  | 5,14E-01 | 7,96E-01 | H2-M5   | 1,54 | No  |
| ENSMUSG00000024462 | 9,19E-02  | 3,820464434  | 9,78E-01  | 3,23E-01 | 6,23E-01 | Gabbr1  | 1,07 | No  |
| ENSMUSG00000024472 | 1,21E-01  | 6,066542449  | 3,50E+00  | 6,14E-02 | 3,08E-01 | Dcp2    | 1,09 | No  |
| ENSMUSG00000024474 | -3,68E-02 | 6,149415921  | 3,24E-01  | 5,69E-01 | 8,30E-01 | Ik      | 0,97 | No  |
| ENSMUSG00000024477 | 6,38E-02  | 5,010154923  | 7,53E-01  | 3,86E-01 | 6,87E-01 | Pggt1b  | 1,05 | No  |
| ENSMUSG00000024479 | 1,86E+00  | -3,033661846 | 1,35E+00  | 2,46E-01 | 5,50E-01 | Mal2    | 3,62 | No  |
| ENSMUSG00000024480 | 6,04E-02  | 5,655778059  | 7,93E-01  | 3,73E-01 | 6,74E-01 | Ap3s1   | 1,04 | No  |
| ENSMUSG00000024481 | -1,87E+00 | -3,107637761 | 1,39E+00  | 2,38E-01 | 5,50E-01 | Lvrn    | 0,27 | No  |
| ENSMUSG00000024483 | 8,09E-02  | 6,874614961  | 1,75E+00  | 1,85E-01 | 5,50E-01 | Ankhd1  | 1,06 | No  |
| ENSMUSG00000024485 | 8,12E-01  | -2,711754475 | 5,73E-01  | 4,49E-01 | 7,39E-01 | Slc4a9  | 1,76 | No  |
| ENSMUSG00000024486 | -1,38E-01 | 3,652609115  | 1,97E+00  | 1,61E-01 | 5,09E-01 | Hbegf   | 0,91 | No  |
| ENSMUSG00000024487 | 1,56E-01  | 5,315528572  | 4,81E+00  | 2,82E-02 | 1,90E-01 | Yipf5   | 1,11 | No  |
| ENSMUSG00000024491 | 9,71E-02  | 5,587627253  | 2,03E+00  | 1,54E-01 | 4,98E-01 | Rbm27   | 1,07 | No  |
| ENSMUSG00000024493 | 1,53E-01  | 5,634019181  | 5,09E+00  | 2,40E-02 | 1,70E-01 | Lars    | 1,11 | No  |
| ENSMUSG00000024497 | -1,14E-02 | -3,033635021 | 1,50E-05  | 9,97E-01 | 1,00E+00 | Pou4f3  | 0,99 | No  |
| ENSMUSG00000024498 | 1,10E-01  | 6,274458448  | 2,97E+00  | 8,46E-02 | 3,73E-01 | Tcerg1  | 1,08 | No  |
| ENSMUSG00000024500 | 9,01E-03  | -3,107646452 | -5,16E-10 | 1,00E+00 | 1,00E+00 | Ppp2r2b | 1,01 | No  |
| ENSMUSG00000024501 | -9,77E-01 | -2,311177799 | 1,16E+00  | 2,82E-01 | 5,79E-01 | Dpysl3  | 0,51 | No  |
| ENSMUSG00000024505 | 1,12E-01  | 1,889974934  | 5,22E-01  | 4,70E-01 | 7,58E-01 | Dtwd2   | 1,08 | No  |
| ENSMUSG00000024507 | -1,04E-01 | 6,400765774  | 2,71E+00  | 1,00E-01 | 3,92E-01 | Hsd17b4 | 0,93 | No  |
| ENSMUSG00000024511 | -9,03E-02 | -1,998136327 | 1,51E-02  | 9,02E-01 | 1,00E+00 | Rab27b  | 0,94 | No  |
| ENSMUSG00000024513 | -2,34E-03 | 6,579222158  | 1,41E-03  | 9,70E-01 | 1,00E+00 | Mbd2    | 1,00 | No  |
| ENSMUSG00000024515 | -4,15E-02 | 6,211018498  | 4,19E-01  | 5,17E-01 | 7,98E-01 | Smad4   | 0,97 | No  |
| ENSMUSG00000024516 | -1,12E-01 | 6,46137661   | 3,16E+00  | 7,57E-02 | 3,50E-01 | Sec11c  | 0,93 | No  |
| ENSMUSG00000024518 | 1,81E+00  | -3,10765737  | 1,28E+00  | 2,58E-01 | 5,50E-01 | Rax     | 3,49 | No  |
| ENSMUSG00000024519 | -1,87E+00 | -3,107637761 | 1,39E+00  | 2,38E-01 | 5,50E-01 | Cplx4   | 0,27 | No  |
| ENSMUSG00000024521 | -5,38E-01 | 7,417927287  | 8,17E+01  | 1,62E-19 | 3,55E-17 | Pmaip1  | 0,69 | Yes |
| ENSMUSG00000024524 | 8,62E-03  | 3,419664429  | 7,20E-03  | 9,32E-01 | 1,00E+00 | Gnal    | 1,01 | No  |
| ENSMUSG00000024525 | 1,91E-01  | 4,85346685   | 6,26E+00  | 1,24E-02 | 1,09E-01 | Impa2   | 1,14 | No  |
| ENSMUSG00000024526 | -2,70E+00 | -2,96323619  | 2,89E+00  | 8,89E-02 | 3,79E-01 | Cidea   | 0,15 | No  |
| ENSMUSG00000024527 | 2,03E-02  | 5,911860275  | 9,48E-02  | 7,58E-01 | 9,36E-01 | Afg3l2  | 1,01 | No  |



|                    |           |              |          |          |          |          |      |     |
|--------------------|-----------|--------------|----------|----------|----------|----------|------|-----|
| ENSMUSG00000024528 | -1,03E-01 | 3,275186019  | 9,46E-01 | 3,31E-01 | 6,31E-01 | Srfbp1   | 0,93 | No  |
| ENSMUSG00000024529 | -2,75E-01 | 0,392889463  | 1,20E+00 | 2,73E-01 | 5,69E-01 | Lox      | 0,83 | No  |
| ENSMUSG00000024530 | -2,45E-01 | -0,448519942 | 4,61E-01 | 4,97E-01 | 7,82E-01 | Prelid3a | 0,84 | No  |
| ENSMUSG00000024533 | -2,55E-01 | 5,845898777  | 1,49E+01 | 1,15E-04 | 2,73E-03 | Spire1   | 0,84 | Yes |
| ENSMUSG00000024534 | 1,82E+00  | -3,033661385 | 1,31E+00 | 2,52E-01 | 5,50E-01 | Sncaip   | 3,54 | No  |
| ENSMUSG00000024535 | 2,88E-01  | 4,657720681  | 1,33E+01 | 2,69E-04 | 5,55E-03 | Snx24    | 1,22 | Yes |
| ENSMUSG00000024537 | -7,51E-02 | 3,381830809  | 5,27E-01 | 4,68E-01 | 7,56E-01 | Psmg2    | 0,95 | No  |
| ENSMUSG00000024538 | 3,14E-01  | 4,741299223  | 1,62E+01 | 5,76E-05 | 1,53E-03 | Ppic     | 1,24 | Yes |
| ENSMUSG00000024539 | 5,14E-02  | 5,290375284  | 5,23E-01 | 4,70E-01 | 7,58E-01 | Ptpn2    | 1,04 | No  |
| ENSMUSG00000024542 | 9,31E-02  | 6,218675459  | 2,11E+00 | 1,47E-01 | 4,85E-01 | Cep192   | 1,07 | No  |
| ENSMUSG00000024544 | 4,21E-01  | 2,951135483  | 1,32E+01 | 2,87E-04 | 5,84E-03 | Ldlrad4  | 1,34 | Yes |
| ENSMUSG00000024548 | 3,49E-01  | -2,033641209 | 2,24E-01 | 6,36E-01 | 8,67E-01 | Setbp1   | 1,27 | No  |
| ENSMUSG00000024552 | 1,28E-01  | -2,146149414 | 3,25E-02 | 8,57E-01 | 9,94E-01 | Slc14a2  | 1,09 | No  |
| ENSMUSG00000024556 | -5,44E-03 | 5,620635673  | 6,37E-03 | 9,36E-01 | 1,00E+00 | Me2      | 1,00 | No  |
| ENSMUSG00000024558 | -1,29E+00 | -2,268111265 | 2,83E+00 | 9,27E-02 | 3,83E-01 | Mapk4    | 0,41 | No  |
| ENSMUSG00000024560 | -2,91E-02 | 5,775977288  | 1,89E-01 | 6,64E-01 | 8,84E-01 | Cxxc1    | 0,98 | No  |
| ENSMUSG00000024561 | -8,97E-02 | 6,317329361  | 1,99E+00 | 1,58E-01 | 5,05E-01 | Mbd1     | 0,94 | No  |
| ENSMUSG00000024563 | 2,20E-02  | 5,777077435  | 1,08E-01 | 7,43E-01 | 9,28E-01 | Smad2    | 1,02 | No  |
| ENSMUSG00000024565 | -2,67E+00 | -2,831989413 | 2,83E+00 | 9,23E-02 | 3,83E-01 | Sall3    | 0,16 | No  |
| ENSMUSG00000024566 | -2,32E-02 | 6,39331366   | 1,34E-01 | 7,14E-01 | 9,12E-01 | Atp9b    | 0,98 | No  |
| ENSMUSG00000024570 | -3,40E-02 | 4,726593278  | 1,92E-01 | 6,61E-01 | 8,82E-01 | Rbfa     | 0,98 | No  |
| ENSMUSG00000024571 | 4,69E-04  | 6,779125534  | 5,82E-05 | 9,94E-01 | 1,00E+00 | Gm16286  | 1,00 | No  |
| ENSMUSG00000024575 | -4,08E-01 | -0,535102262 | 1,21E+00 | 2,71E-01 | 5,67E-01 | Pde6a    | 0,75 | No  |
| ENSMUSG00000024576 | -8,80E-03 | 7,901713082  | 2,28E-02 | 8,80E-01 | 1,00E+00 | Csnk1a1  | 0,99 | No  |
| ENSMUSG00000024579 | 4,00E-01  | 2,956818821  | 1,21E+01 | 5,12E-04 | 9,35E-03 | Pcyox1l  | 1,32 | Yes |
| ENSMUSG00000024580 | 2,24E-01  | 3,814933414  | 6,02E+00 | 1,41E-02 | 1,21E-01 | Grpel2   | 1,17 | No  |
| ENSMUSG00000024581 | 9,27E-03  | 5,802741423  | 1,93E-02 | 8,89E-01 | 1,00E+00 | Napg     | 1,01 | No  |
| ENSMUSG00000024583 | -8,56E-03 | 5,770847899  | 1,63E-02 | 8,98E-01 | 1,00E+00 | Txnl1    | 0,99 | No  |
| ENSMUSG00000024587 | 5,62E-03  | 6,956183408  | 8,51E-03 | 9,26E-01 | 1,00E+00 | Nars     | 1,00 | No  |
| ENSMUSG00000024588 | 7,32E-02  | 5,478822788  | 1,11E+00 | 2,92E-01 | 5,87E-01 | Fech     | 1,05 | No  |
| ENSMUSG00000024589 | -7,64E-04 | 4,601004736  | 9,37E-05 | 9,92E-01 | 1,00E+00 | Nedd4l   | 1,00 | No  |
| ENSMUSG00000024590 | 2,27E-01  | 6,391757079  | 1,29E+01 | 3,34E-04 | 6,61E-03 | Lmnb1    | 1,17 | Yes |

|                    |           |              |          |          |          |               |      |     |
|--------------------|-----------|--------------|----------|----------|----------|---------------|------|-----|
| ENSMUSG00000024592 | 3,02E-01  | 3,159735046  | 8,02E+00 | 4,63E-03 | 5,27E-02 | C330018D20Rik | 1,23 | No  |
| ENSMUSG00000024593 | -5,58E-01 | -2,711748377 | 2,44E-01 | 6,21E-01 | 8,57E-01 | Megf10        | 0,68 | No  |
| ENSMUSG00000024594 | 1,30E-01  | 5,392438644  | 3,42E+00 | 6,46E-02 | 3,18E-01 | Prrc1         | 1,09 | No  |
| ENSMUSG00000024597 | 6,97E-02  | 2,266267365  | 2,51E-01 | 6,16E-01 | 8,54E-01 | Slc12a2       | 1,05 | No  |
| ENSMUSG00000024598 | -1,87E+00 | -3,107637761 | 1,39E+00 | 2,38E-01 | 5,50E-01 | Fbn2          | 0,27 | No  |
| ENSMUSG00000024600 | 3,19E-02  | 0,858976171  | 2,24E-02 | 8,81E-01 | 1,00E+00 | Slc27a6       | 1,02 | No  |
| ENSMUSG00000024601 | 2,05E-02  | 5,756812794  | 9,29E-02 | 7,60E-01 | 9,37E-01 | Isoc1         | 1,01 | No  |
| ENSMUSG00000024603 | -1,20E-01 | 6,292669728  | 3,56E+00 | 5,93E-02 | 3,01E-01 | Dctn4         | 0,92 | No  |
| ENSMUSG00000024604 | 2,97E-02  | 5,8755281    | 2,01E-01 | 6,54E-01 | 8,79E-01 | Rbm22         | 1,02 | No  |
| ENSMUSG00000024608 | -3,84E-01 | 6,385864279  | 3,67E+01 | 1,34E-09 | 1,07E-07 | Rps14         | 0,77 | Yes |
| ENSMUSG00000024610 | -4,99E-02 | 12,88651039  | 8,03E-01 | 3,70E-01 | 6,72E-01 | Cd74          | 0,97 | No  |
| ENSMUSG00000024613 | 3,10E-01  | 6,178629528  | 2,31E+01 | 1,54E-06 | 6,49E-05 | Tcof1         | 1,24 | Yes |
| ENSMUSG00000024614 | 3,96E-02  | 6,358425483  | 3,92E-01 | 5,31E-01 | 8,05E-01 | Tmx3          | 1,03 | No  |
| ENSMUSG00000024617 | 3,73E-01  | 1,952313714  | 5,97E+00 | 1,46E-02 | 1,23E-01 | Camk2a        | 1,30 | No  |
| ENSMUSG00000024620 | -5,80E-01 | -0,300001583 | 3,16E+00 | 7,56E-02 | 3,50E-01 | Pdgfrb        | 0,67 | No  |
| ENSMUSG00000024621 | 1,46E-01  | 9,884864063  | 6,71E+00 | 9,56E-03 | 9,02E-02 | Csf1r         | 1,11 | No  |
| ENSMUSG00000024622 | 1,36E-01  | 5,057983992  | 3,47E+00 | 6,24E-02 | 3,11E-01 | Hmgxb3        | 1,10 | No  |
| ENSMUSG00000024639 | 7,22E-02  | 6,945911374  | 1,40E+00 | 2,36E-01 | 5,50E-01 | Gnaq          | 1,05 | No  |
| ENSMUSG00000024640 | 1,92E-01  | 5,641279377  | 7,88E+00 | 5,01E-03 | 5,61E-02 | Psat1         | 1,14 | No  |
| ENSMUSG00000024642 | 2,01E-01  | 4,826832264  | 6,90E+00 | 8,62E-03 | 8,37E-02 | Tle4          | 1,15 | No  |
| ENSMUSG00000024644 | 2,60E-01  | 8,6536746    | 2,05E+01 | 5,88E-06 | 2,08E-04 | Cndp2         | 1,20 | Yes |
| ENSMUSG00000024645 | 1,59E-01  | 2,975181403  | 1,99E+00 | 1,58E-01 | 5,05E-01 | Timm21        | 1,12 | No  |
| ENSMUSG00000024646 | 4,03E-02  | 7,084420497  | 4,43E-01 | 5,05E-01 | 7,90E-01 | Cyb5a         | 1,03 | No  |
| ENSMUSG00000024653 | -2,25E+00 | -2,548194896 | 4,13E+00 | 4,21E-02 | 2,44E-01 | Scgb1a1       | 0,21 | No  |
| ENSMUSG00000024654 | -4,88E-01 | 2,365175109  | 1,35E+01 | 2,36E-04 | 4,98E-03 | Asrgl1        | 0,71 | Yes |
| ENSMUSG00000024658 | -4,94E-02 | -2,015655484 | 5,09E-03 | 9,43E-01 | 1,00E+00 | Gm9750        | 0,97 | No  |
| ENSMUSG00000024659 | 1,29E-01  | 8,882919426  | 5,12E+00 | 2,36E-02 | 1,68E-01 | Anxa1         | 1,09 | No  |
| ENSMUSG00000024660 | 2,10E-01  | 6,502085445  | 1,12E+01 | 8,36E-04 | 1,39E-02 | Incenp        | 1,16 | Yes |
| ENSMUSG00000024661 | -6,59E-03 | 12,58082695  | 1,40E-02 | 9,06E-01 | 1,00E+00 | Fth1          | 1,00 | No  |
| ENSMUSG00000024663 | 5,05E-01  | 7,008756952  | 6,83E+01 | 1,38E-16 | 2,43E-14 | Rab3il1       | 1,42 | Yes |
| ENSMUSG00000024664 | 2,83E-01  | 4,131091305  | 1,06E+01 | 1,11E-03 | 1,75E-02 | Fads3         | 1,22 | Yes |
| ENSMUSG00000024665 | 3,15E-01  | 4,983556845  | 1,78E+01 | 2,49E-05 | 7,50E-04 | Fads2         | 1,24 | Yes |

|                    |           |              |          |          |          |               |      |     |
|--------------------|-----------|--------------|----------|----------|----------|---------------|------|-----|
| ENSMUSG00000024666 | 1,60E-01  | 2,891370843  | 1,97E+00 | 1,61E-01 | 5,09E-01 | Tmem138       | 1,12 | No  |
| ENSMUSG00000024667 | -6,36E-02 | 3,030435211  | 3,20E-01 | 5,71E-01 | 8,32E-01 | Tmem216       | 0,96 | No  |
| ENSMUSG00000024668 | -1,75E-01 | 6,510811389  | 7,82E+00 | 5,18E-03 | 5,74E-02 | Sdhaf2        | 0,89 | No  |
| ENSMUSG00000024669 | -8,06E-01 | -0,497394818 | 5,06E+00 | 2,45E-02 | 1,72E-01 | Cd5           | 0,57 | No  |
| ENSMUSG00000024670 | -2,06E-01 | 4,549132567  | 6,48E+00 | 1,09E-02 | 9,95E-02 | Cd6           | 0,87 | No  |
| ENSMUSG00000024672 | 4,29E-02  | 2,869853718  | 1,33E-01 | 7,16E-01 | 9,13E-01 | Ms4a7         | 1,03 | No  |
| ENSMUSG00000024673 | -1,28E+00 | -1,600588096 | 5,13E+00 | 2,36E-02 | 1,68E-01 | Ms4a1         | 0,41 | No  |
| ENSMUSG00000024675 | 1,66E-02  | 0,873671853  | 5,97E-03 | 9,38E-01 | 1,00E+00 | Ms4a4c        | 1,01 | No  |
| ENSMUSG00000024677 | -2,50E-01 | 0,477567894  | 1,03E+00 | 3,10E-01 | 6,09E-01 | Ms4a6b        | 0,84 | No  |
| ENSMUSG00000024678 | 1,87E+00  | -3,107639691 | 1,38E+00 | 2,40E-01 | 5,50E-01 | Ms4a4d        | 3,67 | No  |
| ENSMUSG00000024679 | 2,46E-01  | 6,200813962  | 1,46E+01 | 1,36E-04 | 3,12E-03 | Ms4a6d        | 1,19 | Yes |
| ENSMUSG00000024680 | -1,35E+00 | -2,355564206 | 2,50E+00 | 1,14E-01 | 4,17E-01 | Ms4a2         | 0,39 | No  |
| ENSMUSG00000024681 | -1,62E-01 | -1,333262308 | 1,07E-01 | 7,43E-01 | 9,28E-01 | Ms4a3         | 0,89 | No  |
| ENSMUSG00000024682 | 1,38E-01  | -2,37833947  | 1,84E-02 | 8,92E-01 | 1,00E+00 | Gif           | 1,10 | No  |
| ENSMUSG00000024683 | 5,11E-02  | 4,01463846   | 3,32E-01 | 5,65E-01 | 8,27E-01 | Mrpl16        | 1,04 | No  |
| ENSMUSG00000024687 | 1,39E-01  | 6,521470969  | 4,91E+00 | 2,67E-02 | 1,83E-01 | Osbp          | 1,10 | No  |
| ENSMUSG00000024691 | 2,71E-01  | 6,177640793  | 1,78E+01 | 2,50E-05 | 7,52E-04 | Fam111a       | 1,21 | Yes |
| ENSMUSG00000024695 | 1,70E-02  | 7,477493201  | 8,19E-02 | 7,75E-01 | 9,45E-01 | Zfp91         | 1,01 | No  |
| ENSMUSG00000024696 | 2,30E-01  | 5,436161556  | 1,08E+01 | 1,03E-03 | 1,65E-02 | Lpxn          | 1,17 | Yes |
| ENSMUSG00000024697 | 3,12E+00  | -2,8961712   | 3,97E+00 | 4,64E-02 | 2,57E-01 | Gna14         | 8,68 | No  |
| ENSMUSG00000024712 | -4,15E-02 | 6,455806182  | 4,37E-01 | 5,08E-01 | 7,92E-01 | Rfk           | 0,97 | No  |
| ENSMUSG00000024725 | -4,53E-02 | 7,200467279  | 5,68E-01 | 4,51E-01 | 7,41E-01 | Ostf1         | 0,97 | No  |
| ENSMUSG00000024726 | 3,40E-01  | 2,790938667  | 8,13E+00 | 4,36E-03 | 5,04E-02 | Carnmt1       | 1,27 | No  |
| ENSMUSG00000024727 | 2,74E-01  | -0,367043884 | 6,80E-01 | 4,09E-01 | 7,06E-01 | Trpm6         | 1,21 | No  |
| ENSMUSG00000024729 | 3,24E-01  | -2,448592511 | 1,07E-01 | 7,44E-01 | 9,28E-01 | 1700017D01Rik | 1,25 | No  |
| ENSMUSG00000024730 | -1,32E-01 | 2,076501652  | 8,04E-01 | 3,70E-01 | 6,71E-01 | Ms4a8a        | 0,91 | No  |
| ENSMUSG00000024732 | 4,33E-02  | 5,770359848  | 4,12E-01 | 5,21E-01 | 8,00E-01 | Ccdc86        | 1,03 | No  |
| ENSMUSG00000024734 | -1,86E+00 | -2,963205176 | 1,40E+00 | 2,36E-01 | 5,50E-01 | Zp1           | 0,28 | No  |
| ENSMUSG00000024735 | 8,37E-02  | 5,866112557  | 1,59E+00 | 2,07E-01 | 5,50E-01 | Prpf19        | 1,06 | No  |
| ENSMUSG00000024736 | 3,01E-02  | 6,062925422  | 2,14E-01 | 6,44E-01 | 8,72E-01 | Tmem132a      | 1,02 | No  |
| ENSMUSG00000024737 | -9,55E-03 | 8,334887817  | 2,74E-02 | 8,69E-01 | 1,00E+00 | Slc15a3       | 0,99 | No  |
| ENSMUSG00000024738 | 1,87E+00  | -3,107639691 | 1,38E+00 | 2,40E-01 | 5,50E-01 | Pga5          | 3,67 | No  |

|                    |           |              |          |          |          |          |      |     |
|--------------------|-----------|--------------|----------|----------|----------|----------|------|-----|
| ENSMUSG00000024740 | -4,20E-02 | 8,41290496   | 5,33E-01 | 4,65E-01 | 7,54E-01 | Ddb1     | 0,97 | No  |
| ENSMUSG00000024742 | 1,84E-01  | 5,649963429  | 7,32E+00 | 6,82E-03 | 7,05E-02 | Fen1     | 1,14 | No  |
| ENSMUSG00000024743 | -4,72E-01 | 2,9025914    | 1,75E+01 | 2,87E-05 | 8,43E-04 | Syt7     | 0,72 | Yes |
| ENSMUSG00000024747 | -9,81E-01 | -2,355615569 | 1,16E+00 | 2,81E-01 | 5,77E-01 | Aldh1a7  | 0,51 | No  |
| ENSMUSG00000024749 | -1,15E+00 | -1,998014421 | 3,05E+00 | 8,07E-02 | 3,64E-01 | Tmc1     | 0,45 | No  |
| ENSMUSG00000024750 | 4,77E-02  | 7,825526441  | 6,64E-01 | 4,15E-01 | 7,10E-01 | Zfand5   | 1,03 | No  |
| ENSMUSG00000024754 | 2,04E-01  | 4,836483895  | 7,10E+00 | 7,73E-03 | 7,70E-02 | Tmem2    | 1,15 | No  |
| ENSMUSG00000024758 | 1,16E-02  | 7,832996833  | 3,94E-02 | 8,43E-01 | 9,85E-01 | Rtn3     | 1,01 | No  |
| ENSMUSG00000024759 | -4,62E-02 | 7,626817895  | 6,17E-01 | 4,32E-01 | 7,26E-01 | Atl3     | 0,97 | No  |
| ENSMUSG00000024761 | -3,52E-01 | 5,079098273  | 2,32E+01 | 1,44E-06 | 6,10E-05 | Gm16437  | 0,78 | Yes |
| ENSMUSG00000024764 | 1,06E-01  | 6,330960208  | 2,77E+00 | 9,61E-02 | 3,87E-01 | Naa40    | 1,08 | No  |
| ENSMUSG00000024766 | 8,36E-02  | 4,211513345  | 9,69E-01 | 3,25E-01 | 6,26E-01 | Lipo3    | 1,06 | No  |
| ENSMUSG00000024767 | -4,84E-02 | 6,030064742  | 5,50E-01 | 4,58E-01 | 7,47E-01 | Otub1    | 0,97 | No  |
| ENSMUSG00000024768 | -7,76E-02 | -2,963273445 | 2,73E-03 | 9,58E-01 | 1,00E+00 | Lipf     | 0,95 | No  |
| ENSMUSG00000024769 | -3,35E-01 | 4,980685375  | 2,04E+01 | 6,35E-06 | 2,23E-04 | Cdc42bpg | 0,79 | Yes |
| ENSMUSG00000024770 | 1,75E-01  | 3,472422317  | 3,08E+00 | 7,93E-02 | 3,60E-01 | Lipn     | 1,13 | No  |
| ENSMUSG00000024772 | -6,03E-01 | 8,121681003  | 1,08E+02 | 3,28E-25 | 1,17E-22 | Ehd1     | 0,66 | Yes |
| ENSMUSG00000024773 | -8,73E-02 | 6,425836627  | 1,92E+00 | 1,65E-01 | 5,18E-01 | Atg2a    | 0,94 | No  |
| ENSMUSG00000024774 | -4,66E-02 | -2,711655481 | 1,49E-03 | 9,69E-01 | 1,00E+00 | Ankrd22  | 0,97 | No  |
| ENSMUSG00000024776 | 2,84E-01  | 4,143918013  | 1,09E+01 | 9,71E-04 | 1,58E-02 | Stambpl1 | 1,22 | Yes |
| ENSMUSG00000024777 | -1,22E-01 | 5,019146567  | 2,72E+00 | 9,89E-02 | 3,91E-01 | Ppp2r5b  | 0,92 | No  |
| ENSMUSG00000024778 | -4,12E-01 | 4,938796374  | 3,10E+01 | 2,63E-08 | 1,67E-06 | Fas      | 0,75 | Yes |
| ENSMUSG00000024780 | -5,52E-02 | 5,405078565  | 6,30E-01 | 4,27E-01 | 7,21E-01 | Cdc37l1  | 0,96 | No  |
| ENSMUSG00000024781 | 1,06E-03  | 9,095921808  | 3,47E-04 | 9,85E-01 | 1,00E+00 | Lipa     | 1,00 | No  |
| ENSMUSG00000024782 | -1,14E-02 | 6,699771021  | 3,43E-02 | 8,53E-01 | 9,91E-01 | Ak3      | 0,99 | No  |
| ENSMUSG00000024784 | -2,02E+00 | -2,655103724 | 3,10E+00 | 7,83E-02 | 3,57E-01 | Gpha2    | 0,25 | No  |
| ENSMUSG00000024785 | -7,85E-02 | 4,417793821  | 9,39E-01 | 3,33E-01 | 6,33E-01 | Rcl1     | 0,95 | No  |
| ENSMUSG00000024786 | 3,41E-01  | -2,226232298 | 1,18E-01 | 7,31E-01 | 9,22E-01 | Majin    | 1,27 | No  |
| ENSMUSG00000024787 | 3,23E-02  | 4,778008953  | 1,76E-01 | 6,75E-01 | 8,91E-01 | Snx15    | 1,02 | No  |
| ENSMUSG00000024789 | -3,96E-01 | 9,613403074  | 4,92E+01 | 2,35E-12 | 2,71E-10 | Jak2     | 0,76 | Yes |
| ENSMUSG00000024790 | -9,76E-02 | 4,173486639  | 1,31E+00 | 2,52E-01 | 5,50E-01 | Sac3d1   | 0,93 | No  |
| ENSMUSG00000024791 | 1,72E-01  | 4,734607054  | 4,91E+00 | 2,66E-02 | 1,83E-01 | Cdca5    | 1,13 | No  |

|                    |           |              |          |          |          |          |       |     |
|--------------------|-----------|--------------|----------|----------|----------|----------|-------|-----|
| ENSMUSG00000024792 | -4,16E-02 | 4,44138949   | 2,64E-01 | 6,07E-01 | 8,50E-01 | Zfp11    | 0,97  | No  |
| ENSMUSG00000024793 | 1,54E+00  | -1,574289374 | 6,46E+00 | 1,10E-02 | 1,00E-01 | Tnfrsf25 | 2,91  | No  |
| ENSMUSG00000024795 | 3,09E-01  | 5,233259517  | 1,87E+01 | 1,52E-05 | 4,85E-04 | Kif20b   | 1,24  | Yes |
| ENSMUSG00000024797 | -7,96E-02 | 6,053079427  | 1,50E+00 | 2,20E-01 | 5,50E-01 | Vps51    | 0,95  | No  |
| ENSMUSG00000024798 | -5,62E-01 | 3,931206809  | 3,89E+01 | 4,50E-10 | 3,90E-08 | Htr7     | 0,68  | Yes |
| ENSMUSG00000024799 | -1,25E-01 | 4,405854428  | 2,39E+00 | 1,22E-01 | 4,36E-01 | Tm7sf2   | 0,92  | No  |
| ENSMUSG00000024800 | 1,24E-03  | 2,567605872  | 9,47E-05 | 9,92E-01 | 1,00E+00 | Rpp30    | 1,00  | No  |
| ENSMUSG00000024803 | 1,87E+00  | -3,033632735 | 1,36E+00 | 2,43E-01 | 5,50E-01 | Ankrd1   | 3,66  | No  |
| ENSMUSG00000024805 | -4,44E-01 | 5,357759013  | 4,02E+01 | 2,34E-10 | 2,09E-08 | Pcgf5    | 0,74  | Yes |
| ENSMUSG00000024806 | 3,54E+00  | -2,831991944 | 5,43E+00 | 1,98E-02 | 1,50E-01 | Mlana    | 11,60 | No  |
| ENSMUSG00000024807 | 8,53E-02  | 6,048963994  | 1,71E+00 | 1,92E-01 | 5,50E-01 | Syvn1    | 1,06  | No  |
| ENSMUSG00000024810 | -2,68E-02 | -0,669156372 | 5,77E-03 | 9,39E-01 | 1,00E+00 | Ii33     | 0,98  | No  |
| ENSMUSG00000024811 | 4,08E-02  | 7,323207839  | 4,67E-01 | 4,95E-01 | 7,80E-01 | Tnks2    | 1,03  | No  |
| ENSMUSG00000024812 | -5,44E-02 | 5,168648307  | 5,71E-01 | 4,50E-01 | 7,40E-01 | Tjp2     | 0,96  | No  |
| ENSMUSG00000024816 | 1,71E-03  | 6,754174114  | 7,73E-04 | 9,78E-01 | 1,00E+00 | Frmd8    | 1,00  | No  |
| ENSMUSG00000024817 | -2,66E-02 | 6,146769096  | 1,71E-01 | 6,79E-01 | 8,93E-01 | Uhrf2    | 0,98  | No  |
| ENSMUSG00000024818 | -3,28E-02 | 6,187264408  | 2,61E-01 | 6,10E-01 | 8,51E-01 | Slc25a45 | 0,98  | No  |
| ENSMUSG00000024824 | 2,01E-01  | 5,841180225  | 9,15E+00 | 2,49E-03 | 3,32E-02 | Rad9a    | 1,15  | Yes |
| ENSMUSG00000024826 | -5,21E-02 | 6,200982842  | 6,57E-01 | 4,17E-01 | 7,12E-01 | Dpf2     | 0,96  | No  |
| ENSMUSG00000024827 | 1,37E+00  | -2,14600657  | 1,93E+00 | 1,65E-01 | 5,17E-01 | Gldc     | 2,59  | No  |
| ENSMUSG00000024829 | 7,49E-02  | 3,007961302  | 4,31E-01 | 5,11E-01 | 7,94E-01 | Mrpl21   | 1,05  | No  |
| ENSMUSG00000024830 | -7,58E-02 | 3,867026985  | 6,91E-01 | 4,06E-01 | 7,02E-01 | Rps6kb2  | 0,95  | No  |
| ENSMUSG00000024831 | 4,10E-02  | 3,787436782  | 1,92E-01 | 6,61E-01 | 8,82E-01 | Ighmbp2  | 1,03  | No  |
| ENSMUSG00000024833 | 6,20E-02  | 4,987366691  | 7,05E-01 | 4,01E-01 | 6,99E-01 | Pola2    | 1,04  | No  |
| ENSMUSG00000024835 | -6,98E-02 | 8,415320586  | 1,47E+00 | 2,25E-01 | 5,50E-01 | Coro1b   | 0,95  | No  |
| ENSMUSG00000024841 | -9,71E-02 | 5,513119699  | 1,97E+00 | 1,60E-01 | 5,09E-01 | Eif1ad   | 0,93  | No  |
| ENSMUSG00000024842 | -5,49E-01 | -0,963210748 | 1,32E+00 | 2,50E-01 | 5,50E-01 | Cabp4    | 0,68  | No  |
| ENSMUSG00000024843 | -3,47E-01 | 6,313692375  | 2,96E+01 | 5,19E-08 | 3,07E-06 | Chka     | 0,79  | Yes |
| ENSMUSG00000024844 | -4,38E-02 | 5,802863863  | 4,31E-01 | 5,12E-01 | 7,94E-01 | Banf1    | 0,97  | No  |
| ENSMUSG00000024845 | -1,76E-01 | 5,77960342   | 6,93E+00 | 8,48E-03 | 8,28E-02 | Tmem134  | 0,89  | No  |
| ENSMUSG00000024846 | 3,30E-01  | -0,561108728 | 7,55E-01 | 3,85E-01 | 6,86E-01 | Cst6     | 1,26  | No  |
| ENSMUSG00000024847 | -8,62E-02 | 6,079997751  | 1,75E+00 | 1,85E-01 | 5,50E-01 | Aip      | 0,94  | No  |

|                    |           |              |           |          |          |         |      |     |
|--------------------|-----------|--------------|-----------|----------|----------|---------|------|-----|
| ENSMUSG00000024851 | 3,66E-02  | 7,100315189  | 3,69E-01  | 5,44E-01 | 8,12E-01 | Pitpnm1 | 1,03 | No  |
| ENSMUSG00000024853 | 6,61E-03  | 7,553042495  | 1,25E-02  | 9,11E-01 | 1,00E+00 | Sf3b2   | 1,00 | No  |
| ENSMUSG00000024854 | 3,18E-02  | 5,491301307  | 2,12E-01  | 6,45E-01 | 8,73E-01 | Pold4   | 1,02 | No  |
| ENSMUSG00000024855 | -2,97E-02 | 5,534669303  | 1,87E-01  | 6,65E-01 | 8,85E-01 | Pacs1   | 0,98 | No  |
| ENSMUSG00000024856 | 1,13E-01  | 6,084764513  | 3,02E+00  | 8,25E-02 | 3,69E-01 | Cdk2ap2 | 1,08 | No  |
| ENSMUSG00000024858 | 1,65E-02  | 7,588265282  | 7,85E-02  | 7,79E-01 | 9,48E-01 | Grk2    | 1,01 | No  |
| ENSMUSG00000024862 | -1,08E-01 | 4,079465586  | 1,52E+00  | 2,18E-01 | 5,50E-01 | Klc2    | 0,93 | No  |
| ENSMUSG00000024866 | 3,79E-01  | 1,243705629  | 3,65E+00  | 5,60E-02 | 2,90E-01 | Acy3    | 1,30 | No  |
| ENSMUSG00000024867 | 4,89E-01  | -1,7706881   | 6,02E-01  | 4,38E-01 | 7,30E-01 | Pip5k1b | 1,40 | No  |
| ENSMUSG00000024868 | 9,01E-03  | -3,107646452 | -5,16E-10 | 1,00E+00 | 1,00E+00 | Dkk1    | 1,01 | No  |
| ENSMUSG00000024869 | 3,56E-02  | 2,882000985  | 9,17E-02  | 7,62E-01 | 9,38E-01 | Nudt8   | 1,02 | No  |
| ENSMUSG00000024870 | 7,38E-02  | 7,84327018   | 1,59E+00  | 2,07E-01 | 5,50E-01 | Rab1b   | 1,05 | No  |
| ENSMUSG00000024871 | 1,75E-01  | 1,036804036  | 7,30E-01  | 3,93E-01 | 6,93E-01 | Doc2g   | 1,13 | No  |
| ENSMUSG00000024873 | -4,27E-01 | -0,195678775 | 1,65E+00  | 1,99E-01 | 5,50E-01 | Cnih2   | 0,74 | No  |
| ENSMUSG00000024875 | 1,40E-01  | 4,435032185  | 2,94E+00  | 8,65E-02 | 3,78E-01 | Yif1a   | 1,10 | No  |
| ENSMUSG00000024878 | 2,61E-01  | 2,425612362  | 3,83E+00  | 5,02E-02 | 2,72E-01 | Cbwd1   | 1,20 | No  |
| ENSMUSG00000024883 | 3,58E-02  | 0,9931722    | 2,99E-02  | 8,63E-01 | 9,97E-01 | Rin1    | 1,03 | No  |
| ENSMUSG00000024885 | -1,46E-02 | 6,526739211  | 5,42E-02  | 8,16E-01 | 9,69E-01 | Aldh3b1 | 0,99 | No  |
| ENSMUSG00000024887 | -1,28E-01 | 3,469763338  | 1,62E+00  | 2,04E-01 | 5,50E-01 | Asah2   | 0,92 | No  |
| ENSMUSG00000024889 | -4,42E-02 | 4,397772169  | 2,92E-01  | 5,89E-01 | 8,41E-01 | Rce1    | 0,97 | No  |
| ENSMUSG00000024891 | -9,47E-03 | 1,508835338  | 3,10E-03  | 9,56E-01 | 1,00E+00 | Slc29a2 | 0,99 | No  |
| ENSMUSG00000024892 | -2,18E-01 | 3,78724379   | 5,64E+00  | 1,76E-02 | 1,39E-01 | Pcx     | 0,86 | No  |
| ENSMUSG00000024896 | -3,52E-02 | 5,351227206  | 2,47E-01  | 6,19E-01 | 8,56E-01 | Minpp1  | 0,98 | No  |
| ENSMUSG00000024897 | 1,47E-01  | 5,622602195  | 4,68E+00  | 3,05E-02 | 2,01E-01 | Apba1   | 1,11 | No  |
| ENSMUSG00000024899 | -1,40E-01 | 6,47901567   | 5,00E+00  | 2,54E-02 | 1,77E-01 | Papss2  | 0,91 | No  |
| ENSMUSG00000024900 | 2,27E-01  | 7,205954476  | 1,43E+01  | 1,60E-04 | 3,59E-03 | Cpt1a   | 1,17 | Yes |
| ENSMUSG00000024901 | 3,56E-01  | 2,314407935  | 6,45E+00  | 1,11E-02 | 1,01E-01 | Peli3   | 1,28 | No  |
| ENSMUSG00000024902 | -8,05E-02 | 4,418761519  | 9,59E-01  | 3,27E-01 | 6,28E-01 | Mrpl11  | 0,95 | No  |
| ENSMUSG00000024905 | 1,88E-01  | 0,015063556  | 4,11E-01  | 5,21E-01 | 8,00E-01 | Tesmin  | 1,14 | No  |
| ENSMUSG00000024906 | 2,67E-01  | 3,313947369  | 6,68E+00  | 9,73E-03 | 9,15E-02 | Mus81   | 1,20 | No  |
| ENSMUSG00000024907 | -4,65E-01 | -1,600679714 | 7,50E-01  | 3,86E-01 | 6,87E-01 | Gal     | 0,72 | No  |
| ENSMUSG00000024908 | 5,16E-02  | 6,797101872  | 7,04E-01  | 4,01E-01 | 6,99E-01 | Ppp6r3  | 1,04 | No  |

|                    |           |              |          |          |          |          |      |     |
|--------------------|-----------|--------------|----------|----------|----------|----------|------|-----|
| ENSMUSG00000024909 | -3,99E-02 | 2,399535822  | 8,94E-02 | 7,65E-01 | 9,39E-01 | Efemp2   | 0,97 | No  |
| ENSMUSG00000024910 | -1,15E+00 | -2,107629914 | 2,16E+00 | 1,42E-01 | 4,76E-01 | Ctsw     | 0,45 | No  |
| ENSMUSG00000024911 | -6,17E-02 | 4,993957811  | 6,93E-01 | 4,05E-01 | 7,02E-01 | Fibp     | 0,96 | No  |
| ENSMUSG00000024912 | 1,37E-02  | 0,521172016  | 3,03E-03 | 9,56E-01 | 1,00E+00 | Fosl1    | 1,01 | No  |
| ENSMUSG00000024913 | 2,07E-03  | 5,094996521  | 7,87E-04 | 9,78E-01 | 1,00E+00 | Lrp5     | 1,00 | No  |
| ENSMUSG00000024914 | -1,16E-01 | 4,888587405  | 2,36E+00 | 1,24E-01 | 4,41E-01 | Drap1    | 0,92 | No  |
| ENSMUSG00000024921 | 4,10E-02  | 6,014725615  | 3,93E-01 | 5,31E-01 | 8,05E-01 | Smarca2  | 1,03 | No  |
| ENSMUSG00000024922 | -2,79E-03 | -1,726162952 | 2,21E-05 | 9,96E-01 | 1,00E+00 | Ovol1    | 1,00 | No  |
| ENSMUSG00000024924 | 8,78E-01  | -1,01576363  | 3,68E+00 | 5,52E-02 | 2,88E-01 | Vldlr    | 1,84 | No  |
| ENSMUSG00000024925 | -3,87E-03 | 4,66498452   | 2,44E-03 | 9,61E-01 | 1,00E+00 | Rnaseh2c | 1,00 | No  |
| ENSMUSG00000024926 | 4,47E-02  | 4,601532324  | 3,22E-01 | 5,70E-01 | 8,31E-01 | Kat5     | 1,03 | No  |
| ENSMUSG00000024927 | -1,58E-01 | 6,625629543  | 6,47E+00 | 1,10E-02 | 9,98E-02 | Rela     | 0,90 | No  |
| ENSMUSG00000024935 | -5,42E-01 | -2,929296767 | 1,49E-01 | 7,00E-01 | 9,04E-01 | Slc1a1   | 0,69 | No  |
| ENSMUSG00000024936 | -3,27E-01 | 1,794460901  | 4,28E+00 | 3,85E-02 | 2,33E-01 | Kcnk7    | 0,80 | No  |
| ENSMUSG00000024937 | 3,90E-02  | 7,839502865  | 4,46E-01 | 5,04E-01 | 7,89E-01 | Ehbp1l1  | 1,03 | No  |
| ENSMUSG00000024939 | 1,25E-01  | 5,333406599  | 3,14E+00 | 7,62E-02 | 3,52E-01 | Fam89b   | 1,09 | No  |
| ENSMUSG00000024940 | -2,68E-01 | 4,716887879  | 1,18E+01 | 5,90E-04 | 1,05E-02 | Ltbp3    | 0,83 | Yes |
| ENSMUSG00000024941 | 5,58E-02  | 6,077848024  | 7,34E-01 | 3,91E-01 | 6,91E-01 | Scyl1    | 1,04 | No  |
| ENSMUSG00000024942 | -2,70E-02 | 6,894946396  | 1,95E-01 | 6,59E-01 | 8,81E-01 | Capn1    | 0,98 | No  |
| ENSMUSG00000024943 | 6,32E-02  | 6,019999946  | 9,34E-01 | 3,34E-01 | 6,34E-01 | Smc5     | 1,04 | No  |
| ENSMUSG00000024944 | 1,65E-01  | 4,047021747  | 3,52E+00 | 6,06E-02 | 3,05E-01 | Arl2     | 1,12 | No  |
| ENSMUSG00000024947 | 4,52E-02  | 5,581600587  | 4,40E-01 | 5,07E-01 | 7,91E-01 | Men1     | 1,03 | No  |
| ENSMUSG00000024948 | -5,21E-02 | 6,090664004  | 6,48E-01 | 4,21E-01 | 7,16E-01 | Map4k2   | 0,96 | No  |
| ENSMUSG00000024949 | -2,57E-02 | 7,957200228  | 1,95E-01 | 6,59E-01 | 8,81E-01 | Sf1      | 0,98 | No  |
| ENSMUSG00000024952 | -8,47E-02 | 6,628653829  | 1,86E+00 | 1,72E-01 | 5,29E-01 | Rps6ka4  | 0,94 | No  |
| ENSMUSG00000024953 | -1,39E-01 | 7,855318603  | 5,63E+00 | 1,77E-02 | 1,39E-01 | Prdx5    | 0,91 | No  |
| ENSMUSG00000024955 | 2,81E-02  | 5,569539852  | 1,69E-01 | 6,81E-01 | 8,94E-01 | Esrra    | 1,02 | No  |
| ENSMUSG00000024957 | 6,85E-01  | -2,311104076 | 6,81E-01 | 4,09E-01 | 7,06E-01 | Kcnk4    | 1,61 | No  |
| ENSMUSG00000024958 | 1,10E-01  | 4,973915227  | 2,18E+00 | 1,40E-01 | 4,72E-01 | Gpr137   | 1,08 | No  |
| ENSMUSG00000024959 | -1,34E-01 | 4,919518338  | 3,22E+00 | 7,28E-02 | 3,42E-01 | Bad      | 0,91 | No  |
| ENSMUSG00000024960 | 1,25E-01  | 5,480055792  | 3,27E+00 | 7,06E-02 | 3,36E-01 | Plcb3    | 1,09 | No  |
| ENSMUSG00000024962 | 1,70E-01  | 3,779287072  | 3,31E+00 | 6,90E-02 | 3,31E-01 | Vegfb    | 1,12 | No  |

|                    |           |              |           |          |          |          |      |     |
|--------------------|-----------|--------------|-----------|----------|----------|----------|------|-----|
| ENSMUSG00000024963 | -6,69E-02 | 3,942159545  | 5,50E-01  | 4,58E-01 | 7,47E-01 | Dnajc4   | 0,95 | No  |
| ENSMUSG00000024965 | 8,14E-02  | 8,209559842  | 1,98E+00  | 1,60E-01 | 5,07E-01 | Fermt3   | 1,06 | No  |
| ENSMUSG00000024966 | -7,87E-02 | 6,393471645  | 1,55E+00  | 2,13E-01 | 5,50E-01 | Stip1    | 0,95 | No  |
| ENSMUSG00000024968 | 9,07E-01  | -0,980884405 | 4,26E+00  | 3,90E-02 | 2,34E-01 | Rcor2    | 1,88 | No  |
| ENSMUSG00000024969 | 1,55E-01  | 6,407918736  | 6,00E+00  | 1,43E-02 | 1,22E-01 | Mark2    | 1,11 | No  |
| ENSMUSG00000024970 | -1,26E-01 | 3,941013115  | 1,98E+00  | 1,59E-01 | 5,06E-01 | Al846148 | 0,92 | No  |
| ENSMUSG00000024972 | -1,88E+00 | -2,963233427 | 1,42E+00  | 2,33E-01 | 5,50E-01 | Lgals12  | 0,27 | No  |
| ENSMUSG00000024974 | 7,51E-02  | 5,891938295  | 1,29E+00  | 2,56E-01 | 5,50E-01 | Smc3     | 1,05 | No  |
| ENSMUSG00000024975 | -5,02E-01 | 5,40803876   | 5,28E+01  | 3,69E-13 | 4,74E-11 | Pdcd4    | 0,71 | Yes |
| ENSMUSG00000024976 | 8,56E-02  | 5,944793645  | 1,70E+00  | 1,92E-01 | 5,50E-01 | Shoc2    | 1,06 | No  |
| ENSMUSG00000024978 | 1,69E-01  | 3,150309528  | 2,46E+00  | 1,17E-01 | 4,23E-01 | Gpam     | 1,12 | No  |
| ENSMUSG00000024981 | 4,28E-02  | 7,062441306  | 5,01E-01  | 4,79E-01 | 7,66E-01 | Acsl5    | 1,03 | No  |
| ENSMUSG00000024982 | -3,46E-02 | 5,667605979  | 2,62E-01  | 6,09E-01 | 8,51E-01 | Zdhhc6   | 0,98 | No  |
| ENSMUSG00000024983 | -1,21E-01 | 5,449866459  | 3,05E+00  | 8,07E-02 | 3,64E-01 | Vti1a    | 0,92 | No  |
| ENSMUSG00000024985 | 1,40E-01  | 5,234084292  | 3,78E+00  | 5,18E-02 | 2,77E-01 | Tcf7l2   | 1,10 | No  |
| ENSMUSG00000024986 | -1,20E-01 | 5,341508727  | 2,84E+00  | 9,22E-02 | 3,82E-01 | Hhex     | 0,92 | No  |
| ENSMUSG00000024987 | -4,13E-02 | -3,033659495 | 7,08E-04  | 9,79E-01 | 1,00E+00 | Cyp26a1  | 0,97 | No  |
| ENSMUSG00000024989 | 1,49E-01  | 5,117837192  | 4,20E+00  | 4,05E-02 | 2,38E-01 | Cep55    | 1,11 | No  |
| ENSMUSG00000024990 | -3,17E-02 | 3,807385626  | 1,16E-01  | 7,34E-01 | 9,23E-01 | Rbp4     | 0,98 | No  |
| ENSMUSG00000024991 | -3,94E-02 | 8,924165052  | 4,79E-01  | 4,89E-01 | 7,76E-01 | Eif3a    | 0,97 | No  |
| ENSMUSG00000024992 | 6,94E-01  | -2,89617475  | 2,61E-01  | 6,09E-01 | 8,51E-01 | Pde6c    | 1,62 | No  |
| ENSMUSG00000024993 | 5,16E-02  | 5,278219255  | 5,23E-01  | 4,70E-01 | 7,58E-01 | Fam45a   | 1,04 | No  |
| ENSMUSG00000024997 | -1,03E-01 | 6,103456461  | 2,55E+00  | 1,10E-01 | 4,07E-01 | Prdx3    | 0,93 | No  |
| ENSMUSG00000024998 | 1,54E+00  | -1,929396785 | 4,50E+00  | 3,39E-02 | 2,16E-01 | Plce1    | 2,90 | No  |
| ENSMUSG00000024999 | 9,32E-02  | 3,889673322  | 1,08E+00  | 2,99E-01 | 5,95E-01 | Noc3l    | 1,07 | No  |
| ENSMUSG00000025001 | 2,34E-01  | 4,344555286  | 7,99E+00  | 4,70E-03 | 5,34E-02 | Hells    | 1,18 | No  |
| ENSMUSG00000025002 | -1,89E+00 | -3,1076441   | 1,42E+00  | 2,33E-01 | 5,50E-01 | Cyp2c55  | 0,27 | No  |
| ENSMUSG00000025006 | -8,17E-01 | -0,946116071 | 4,01E+00  | 4,52E-02 | 2,54E-01 | Sorbs1   | 0,57 | No  |
| ENSMUSG00000025007 | -6,59E-02 | 5,721401196  | 9,69E-01  | 3,25E-01 | 6,26E-01 | Aldh18a1 | 0,96 | No  |
| ENSMUSG00000025008 | 2,65E-01  | 3,398698943  | 6,68E+00  | 9,75E-03 | 9,16E-02 | Tctn3    | 1,20 | No  |
| ENSMUSG00000025010 | 5,71E-02  | 3,400615313  | 3,14E-01  | 5,75E-01 | 8,34E-01 | Ccnj     | 1,04 | No  |
| ENSMUSG00000025013 | 3,14E-02  | -3,107617333 | -7,69E-10 | 1,00E+00 | 1,00E+00 | Tll2     | 1,02 | No  |



|                    |           |              |           |          |          |          |      |     |
|--------------------|-----------|--------------|-----------|----------|----------|----------|------|-----|
| ENSMUSG00000025014 | -7,42E-02 | -2,401435329 | 6,29E-03  | 9,37E-01 | 1,00E+00 | Dntt     | 0,95 | No  |
| ENSMUSG00000025016 | 8,44E-02  | 7,997425828  | 2,10E+00  | 1,47E-01 | 4,86E-01 | Tm9sf3   | 1,06 | No  |
| ENSMUSG00000025017 | 1,61E-03  | 7,016493648  | 6,99E-04  | 9,79E-01 | 1,00E+00 | Pik3ap1  | 1,00 | No  |
| ENSMUSG00000025019 | 3,64E-02  | 4,45469335   | 2,03E-01  | 6,52E-01 | 8,77E-01 | Lcor     | 1,03 | No  |
| ENSMUSG00000025020 | 6,92E-01  | -1,311195329 | 1,73E+00  | 1,88E-01 | 5,50E-01 | Slit1    | 1,62 | No  |
| ENSMUSG00000025024 | -5,60E-02 | 5,708270694  | 6,88E-01  | 4,07E-01 | 7,03E-01 | Smndc1   | 0,96 | No  |
| ENSMUSG00000025025 | -5,87E-02 | 5,417669474  | 7,10E-01  | 3,99E-01 | 6,98E-01 | Mxi1     | 0,96 | No  |
| ENSMUSG00000025026 | -2,69E-02 | 6,652240976  | 1,88E-01  | 6,65E-01 | 8,85E-01 | Add3     | 0,98 | No  |
| ENSMUSG00000025027 | 6,25E-02  | 5,673519112  | 8,52E-01  | 3,56E-01 | 6,57E-01 | Xpnpep1  | 1,04 | No  |
| ENSMUSG00000025034 | 9,17E-02  | 6,32951129   | 2,07E+00  | 1,50E-01 | 4,91E-01 | Trim8    | 1,07 | No  |
| ENSMUSG00000025035 | -2,30E-01 | 3,891893774  | 6,30E+00  | 1,20E-02 | 1,07E-01 | Arl3     | 0,85 | No  |
| ENSMUSG00000025036 | 2,16E-01  | 4,157801873  | 6,22E+00  | 1,26E-02 | 1,11E-01 | Sfxn2    | 1,16 | No  |
| ENSMUSG00000025041 | -6,94E-02 | 5,073749144  | 8,88E-01  | 3,46E-01 | 6,47E-01 | Nt5c2    | 0,95 | No  |
| ENSMUSG00000025044 | 1,26E-01  | 8,35501455   | 4,78E+00  | 2,89E-02 | 1,93E-01 | Msr1     | 1,09 | No  |
| ENSMUSG00000025047 | 1,47E-01  | 5,580559651  | 4,65E+00  | 3,11E-02 | 2,04E-01 | Pdcd11   | 1,11 | No  |
| ENSMUSG00000025049 | 1,15E-01  | 3,200609587  | 1,18E+00  | 2,78E-01 | 5,74E-01 | Taf5     | 1,08 | No  |
| ENSMUSG00000025050 | 6,45E-02  | 2,352287345  | 2,34E-01  | 6,29E-01 | 8,62E-01 | Pcgf6    | 1,05 | No  |
| ENSMUSG00000025060 | 4,91E-02  | 8,095541931  | 7,16E-01  | 3,97E-01 | 6,98E-01 | Slk      | 1,03 | No  |
| ENSMUSG00000025064 | -1,02E+00 | -0,600573175 | 7,77E+00  | 5,30E-03 | 5,83E-02 | Col17a1  | 0,49 | No  |
| ENSMUSG00000025066 | -5,62E-02 | 6,044534184  | 7,44E-01  | 3,88E-01 | 6,88E-01 | Sfr1     | 0,96 | No  |
| ENSMUSG00000025068 | -1,93E-01 | 7,242573587  | 1,04E+01  | 1,24E-03 | 1,93E-02 | Gsto1    | 0,87 | Yes |
| ENSMUSG00000025069 | 1,70E-01  | -1,070162612 | 1,25E-01  | 7,24E-01 | 9,18E-01 | Gsto2    | 1,13 | No  |
| ENSMUSG00000025075 | 1,17E+00  | -3,14612376  | 6,40E-01  | 4,24E-01 | 7,18E-01 | Habp2    | 2,26 | No  |
| ENSMUSG00000025076 | 1,19E-01  | 6,123149641  | 3,39E+00  | 6,56E-02 | 3,21E-01 | Casp7    | 1,09 | No  |
| ENSMUSG00000025077 | 9,26E-02  | 4,314687526  | 1,26E+00  | 2,62E-01 | 5,56E-01 | Dclre1a  | 1,07 | No  |
| ENSMUSG00000025078 | -1,13E-01 | 5,34023622   | 2,57E+00  | 1,09E-01 | 4,05E-01 | Nhlrc2   | 0,92 | No  |
| ENSMUSG00000025081 | 9,01E-03  | -3,107646452 | -5,16E-10 | 1,00E+00 | 1,00E+00 | Tdrd1    | 1,01 | No  |
| ENSMUSG00000025083 | -2,85E-01 | 1,396204395  | 2,79E+00  | 9,48E-02 | 3,85E-01 | Afap1l2  | 0,82 | No  |
| ENSMUSG00000025085 | -6,48E-01 | 3,674734599  | 4,73E+01  | 5,99E-12 | 6,60E-10 | Ablim1   | 0,64 | Yes |
| ENSMUSG00000025086 | 1,88E-01  | 3,100573546  | 2,91E+00  | 8,78E-02 | 3,78E-01 | Trub1    | 1,14 | No  |
| ENSMUSG00000025089 | 3,89E-01  | 0,266096304  | 2,04E+00  | 1,53E-01 | 4,95E-01 | Gfra1    | 1,31 | No  |
| ENSMUSG00000025091 | 9,01E-03  | -3,107646452 | -5,16E-10 | 1,00E+00 | 1,00E+00 | Pnliprp2 | 1,01 | No  |

|                    |           |              |           |          |          |               |      |     |
|--------------------|-----------|--------------|-----------|----------|----------|---------------|------|-----|
| ENSMUSG00000025092 | 9,90E-02  | -1,311189973 | 3,89E-02  | 8,44E-01 | 9,85E-01 | Hspa12a       | 1,07 | No  |
| ENSMUSG00000025094 | 1,56E-02  | 1,364874753  | 7,53E-03  | 9,31E-01 | 1,00E+00 | Slc18a2       | 1,01 | No  |
| ENSMUSG00000025102 | -2,75E-01 | 3,199899871  | 6,82E+00  | 9,00E-03 | 8,64E-02 | 3110040N11Rik | 0,83 | No  |
| ENSMUSG00000025103 | 4,95E-02  | 5,670674526  | 5,32E-01  | 4,66E-01 | 7,54E-01 | Btbd1         | 1,03 | No  |
| ENSMUSG00000025104 | 1,70E-01  | 6,05351478   | 6,79E+00  | 9,15E-03 | 8,74E-02 | Hdgfl3        | 1,13 | No  |
| ENSMUSG00000025105 | 1,87E+00  | -3,107639691 | 1,38E+00  | 2,40E-01 | 5,50E-01 | Bnc1          | 3,67 | No  |
| ENSMUSG00000025127 | 7,18E-01  | -2,770576837 | 2,82E-01  | 5,96E-01 | 8,44E-01 | Gcgr          | 1,65 | No  |
| ENSMUSG00000025128 | 3,14E-02  | -3,107617333 | -7,69E-10 | 1,00E+00 | 1,00E+00 | Bhlhe22       | 1,02 | No  |
| ENSMUSG00000025129 | -2,73E-02 | -2,963256629 | 3,40E-04  | 9,85E-01 | 1,00E+00 | Ppp1r27       | 0,98 | No  |
| ENSMUSG00000025130 | 1,36E-01  | 9,628413773  | 5,79E+00  | 1,61E-02 | 1,32E-01 | P4hb          | 1,10 | No  |
| ENSMUSG00000025132 | 4,10E-02  | 9,830167576  | 5,29E-01  | 4,67E-01 | 7,55E-01 | Arhgdia       | 1,03 | No  |
| ENSMUSG00000025133 | 1,09E-01  | 5,208523689  | 2,31E+00  | 1,28E-01 | 4,50E-01 | Ints4         | 1,08 | No  |
| ENSMUSG00000025134 | 8,73E-02  | 5,887380799  | 1,74E+00  | 1,88E-01 | 5,50E-01 | Alyref        | 1,06 | No  |
| ENSMUSG00000025135 | 9,43E-02  | 6,086600743  | 2,11E+00  | 1,46E-01 | 4,84E-01 | Anapc11       | 1,07 | No  |
| ENSMUSG00000025137 | 1,12E-01  | 5,715188122  | 2,76E+00  | 9,66E-02 | 3,88E-01 | Pcyt2         | 1,08 | No  |
| ENSMUSG00000025138 | 1,04E-02  | 6,163414624  | 2,62E-02  | 8,71E-01 | 1,00E+00 | Sirt7         | 1,01 | No  |
| ENSMUSG00000025139 | 8,30E-02  | 7,069235244  | 1,88E+00  | 1,70E-01 | 5,26E-01 | Tollip        | 1,06 | No  |
| ENSMUSG00000025140 | 7,46E-01  | -0,778159139 | 3,33E+00  | 6,80E-02 | 3,28E-01 | Pycr1         | 1,68 | No  |
| ENSMUSG00000025142 | -2,54E-02 | 4,880080995  | 1,13E-01  | 7,37E-01 | 9,25E-01 | Aspscr1       | 0,98 | No  |
| ENSMUSG00000025144 | 9,22E-02  | 4,630712468  | 1,37E+00  | 2,42E-01 | 5,50E-01 | Cenpx         | 1,07 | No  |
| ENSMUSG00000025145 | 1,03E-01  | 4,754452628  | 1,82E+00  | 1,77E-01 | 5,37E-01 | Lrrc45        | 1,07 | No  |
| ENSMUSG00000025147 | 3,50E-02  | 4,769207314  | 2,09E-01  | 6,47E-01 | 8,75E-01 | Mob2          | 1,02 | No  |
| ENSMUSG00000025150 | 8,11E-01  | -1,600725113 | 1,83E+00  | 1,76E-01 | 5,35E-01 | Cbr2          | 1,75 | No  |
| ENSMUSG00000025153 | 3,14E-01  | 8,474233318  | 2,98E+01  | 4,85E-08 | 2,90E-06 | Fasn          | 1,24 | Yes |
| ENSMUSG00000025154 | 2,84E-01  | 5,503559512  | 1,69E+01  | 4,02E-05 | 1,13E-03 | Arhgap19      | 1,22 | Yes |
| ENSMUSG00000025155 | 5,27E-02  | 5,011494123  | 5,05E-01  | 4,77E-01 | 7,65E-01 | Dus1l         | 1,04 | No  |
| ENSMUSG00000025156 | -2,04E-02 | 4,816752351  | 7,13E-02  | 7,89E-01 | 9,54E-01 | Gps1          | 0,99 | No  |
| ENSMUSG00000025157 | 1,57E-02  | 4,516027234  | 3,91E-02  | 8,43E-01 | 9,85E-01 | Zdhhc16       | 1,01 | No  |
| ENSMUSG00000025158 | -7,28E-03 | 4,387521272  | 7,76E-03  | 9,30E-01 | 1,00E+00 | Rfng          | 0,99 | No  |
| ENSMUSG00000025159 | 2,78E-03  | 6,178281163  | 1,87E-03  | 9,66E-01 | 1,00E+00 | Mms19         | 1,00 | No  |
| ENSMUSG00000025161 | 1,95E-01  | 7,36729964   | 1,06E+01  | 1,12E-03 | 1,77E-02 | Slc16a3       | 1,14 | Yes |
| ENSMUSG00000025162 | -7,41E-02 | 7,568218715  | 1,58E+00  | 2,09E-01 | 5,50E-01 | Csnk1d        | 0,95 | No  |

|                    |           |              |          |          |          |            |      |     |
|--------------------|-----------|--------------|----------|----------|----------|------------|------|-----|
| ENSMUSG00000025163 | -8,89E-02 | 0,696823393  | 1,50E-01 | 6,99E-01 | 9,04E-01 | Cd7        | 0,94 | No  |
| ENSMUSG00000025165 | 1,01E+00  | 1,312535087  | 2,79E+01 | 1,31E-07 | 7,10E-06 | Sectm1a    | 2,02 | Yes |
| ENSMUSG00000025169 | -1,12E-01 | 1,856069643  | 5,18E-01 | 4,72E-01 | 7,60E-01 | Ogfod3     | 0,93 | No  |
| ENSMUSG00000025170 | 9,80E-01  | -1,497578289 | 3,15E+00 | 7,57E-02 | 3,50E-01 | Rab40b     | 1,97 | No  |
| ENSMUSG00000025171 | 9,51E-02  | 5,616288933  | 1,92E+00 | 1,66E-01 | 5,18E-01 | Ubtd1      | 1,07 | No  |
| ENSMUSG00000025172 | 7,34E-01  | -2,896175673 | 2,93E-01 | 5,88E-01 | 8,40E-01 | Ankrd2     | 1,66 | No  |
| ENSMUSG00000025173 | -2,59E-03 | 5,828299332  | 1,51E-03 | 9,69E-01 | 1,00E+00 | Wdr45b     | 1,00 | No  |
| ENSMUSG00000025175 | 1,10E+00  | -2,401451033 | 1,15E+00 | 2,83E-01 | 5,79E-01 | Fn3k       | 2,15 | No  |
| ENSMUSG00000025176 | -3,49E-01 | 0,351929825  | 1,79E+00 | 1,81E-01 | 5,43E-01 | Hoga1      | 0,79 | No  |
| ENSMUSG00000025178 | 7,28E-02  | 7,278700561  | 1,48E+00 | 2,24E-01 | 5,50E-01 | Pi4k2a     | 1,05 | No  |
| ENSMUSG00000025184 | -1,69E-03 | 4,200487011  | 3,97E-04 | 9,84E-01 | 1,00E+00 | R3hcc1l    | 1,00 | No  |
| ENSMUSG00000025185 | -6,18E-01 | -2,185707564 | 5,21E-01 | 4,71E-01 | 7,59E-01 | Loxl4      | 0,65 | No  |
| ENSMUSG00000025188 | 8,23E-02  | 5,026506872  | 1,25E+00 | 2,64E-01 | 5,59E-01 | Hps1       | 1,06 | No  |
| ENSMUSG00000025189 | -1,89E+00 | -3,1076441   | 1,42E+00 | 2,33E-01 | 5,50E-01 | Cnm1       | 0,27 | No  |
| ENSMUSG00000025190 | 1,13E-01  | 6,61948382   | 3,29E+00 | 6,97E-02 | 3,33E-01 | Got1       | 1,08 | No  |
| ENSMUSG00000025192 | 2,44E-01  | 4,299256683  | 8,58E+00 | 3,39E-03 | 4,20E-02 | Entpd7     | 1,18 | Yes |
| ENSMUSG00000025193 | 1,09E-01  | 2,508134055  | 7,08E-01 | 4,00E-01 | 6,99E-01 | Cutc       | 1,08 | No  |
| ENSMUSG00000025194 | -1,31E+00 | -1,522465906 | 6,11E+00 | 1,35E-02 | 1,16E-01 | Abcc2      | 0,40 | No  |
| ENSMUSG00000025195 | 2,10E-01  | 4,30362656   | 6,28E+00 | 1,22E-02 | 1,08E-01 | Dnmbp      | 1,16 | No  |
| ENSMUSG00000025196 | 5,07E-01  | -2,401341631 | 3,50E-01 | 5,54E-01 | 8,20E-01 | Cpn1       | 1,42 | No  |
| ENSMUSG00000025197 | -1,86E+00 | -3,033612668 | 1,39E+00 | 2,38E-01 | 5,50E-01 | Cyp2c44    | 0,28 | No  |
| ENSMUSG00000025198 | -1,40E-01 | 5,525183145  | 4,20E+00 | 4,04E-02 | 2,38E-01 | Erlin1     | 0,91 | No  |
| ENSMUSG00000025199 | -1,42E-02 | 6,115710355  | 4,83E-02 | 8,26E-01 | 9,75E-01 | Chuk       | 0,99 | No  |
| ENSMUSG00000025200 | 4,36E-02  | 3,500192493  | 1,93E-01 | 6,61E-01 | 8,82E-01 | Cwf19l1    | 1,03 | No  |
| ENSMUSG00000025201 | -1,72E-01 | 4,923377011  | 5,24E+00 | 2,21E-02 | 1,61E-01 | Bloc1s2-ps | 0,89 | No  |
| ENSMUSG00000025202 | 8,77E-02  | 1,91906259   | 3,30E-01 | 5,66E-01 | 8,28E-01 | Scd3       | 1,06 | No  |
| ENSMUSG00000025203 | 4,76E-01  | 10,4820825   | 7,18E+01 | 2,40E-17 | 4,65E-15 | Scd2       | 1,39 | Yes |
| ENSMUSG00000025204 | 7,40E-02  | 5,772207154  | 1,21E+00 | 2,71E-01 | 5,67E-01 | Ndufb8     | 1,05 | No  |
| ENSMUSG00000025207 | 7,66E-01  | -1,711759838 | 1,44E+00 | 2,31E-01 | 5,50E-01 | Sema4g     | 1,70 | No  |
| ENSMUSG00000025208 | -4,96E-02 | 5,670205283  | 5,34E-01 | 4,65E-01 | 7,54E-01 | Mrpl43     | 0,97 | No  |
| ENSMUSG00000025209 | -2,48E-02 | 3,757199868  | 7,00E-02 | 7,91E-01 | 9,55E-01 | Twink      | 0,98 | No  |
| ENSMUSG00000025212 | 2,76E-01  | 6,105458342  | 1,81E+01 | 2,09E-05 | 6,48E-04 | Sfxn3      | 1,21 | Yes |

|                    |           |              |          |          |          |          |      |     |
|--------------------|-----------|--------------|----------|----------|----------|----------|------|-----|
| ENSMUSG00000025213 | -4,10E-02 | 2,216191934  | 7,89E-02 | 7,79E-01 | 9,47E-01 | Kazald1  | 0,97 | No  |
| ENSMUSG00000025217 | -1,05E-01 | 4,355376354  | 1,62E+00 | 2,03E-01 | 5,50E-01 | Btrc     | 0,93 | No  |
| ENSMUSG00000025218 | -3,22E-02 | 3,771452705  | 1,22E-01 | 7,27E-01 | 9,19E-01 | Poll     | 0,98 | No  |
| ENSMUSG00000025220 | -1,53E-01 | 7,343447461  | 6,62E+00 | 1,01E-02 | 9,38E-02 | Mgea5    | 0,90 | No  |
| ENSMUSG00000025221 | 6,07E-01  | -2,548194757 | 4,11E-01 | 5,21E-01 | 8,00E-01 | Kcnip2   | 1,52 | No  |
| ENSMUSG00000025223 | -9,23E-02 | 6,4123612    | 2,14E+00 | 1,44E-01 | 4,79E-01 | Ldb1     | 0,94 | No  |
| ENSMUSG00000025224 | 9,23E-03  | 6,443848174  | 2,14E-02 | 8,84E-01 | 1,00E+00 | Gbf1     | 1,01 | No  |
| ENSMUSG00000025225 | -4,88E-01 | 7,308658691  | 6,70E+01 | 2,68E-16 | 4,61E-14 | Nfkb2    | 0,71 | Yes |
| ENSMUSG00000025226 | -3,27E-02 | 2,561941507  | 6,52E-02 | 7,98E-01 | 9,59E-01 | Fbxl15   | 0,98 | No  |
| ENSMUSG00000025227 | 1,05E-01  | 5,150432482  | 2,08E+00 | 1,49E-01 | 4,90E-01 | Mfsd13a  | 1,08 | No  |
| ENSMUSG00000025228 | 3,18E-02  | 7,633306979  | 2,92E-01 | 5,89E-01 | 8,41E-01 | Actr1a   | 1,02 | No  |
| ENSMUSG00000025231 | 9,21E-04  | 4,54762606   | 1,33E-04 | 9,91E-01 | 1,00E+00 | Sufu     | 1,00 | No  |
| ENSMUSG00000025232 | 1,85E-01  | 8,242642455  | 1,02E+01 | 1,40E-03 | 2,12E-02 | Hexa     | 1,14 | Yes |
| ENSMUSG00000025234 | 1,46E-02  | 7,299424749  | 5,99E-02 | 8,07E-01 | 9,64E-01 | Arih1    | 1,01 | No  |
| ENSMUSG00000025235 | -4,33E-02 | 2,294656768  | 9,73E-02 | 7,55E-01 | 9,34E-01 | Bbs4     | 0,97 | No  |
| ENSMUSG00000025236 | 7,51E-02  | 5,837790062  | 1,28E+00 | 2,58E-01 | 5,51E-01 | Adpgk    | 1,05 | No  |
| ENSMUSG00000025237 | -1,76E-01 | 3,959409222  | 3,91E+00 | 4,81E-02 | 2,64E-01 | Parp6    | 0,89 | No  |
| ENSMUSG00000025239 | -7,44E-03 | 7,568780582  | 1,59E-02 | 9,00E-01 | 1,00E+00 | Limd1    | 0,99 | No  |
| ENSMUSG00000025240 | 3,05E-02  | 5,15123457   | 1,77E-01 | 6,74E-01 | 8,90E-01 | Sacm1l   | 1,02 | No  |
| ENSMUSG00000025241 | -2,36E-01 | 6,012929116  | 1,32E+01 | 2,81E-04 | 5,75E-03 | Fyco1    | 0,85 | Yes |
| ENSMUSG00000025243 | 5,53E-02  | 4,255014262  | 4,33E-01 | 5,11E-01 | 7,94E-01 | Slc6a20b | 1,04 | No  |
| ENSMUSG00000025245 | -1,87E-01 | 3,688903651  | 3,85E+00 | 4,99E-02 | 2,70E-01 | Lztf1l   | 0,88 | No  |
| ENSMUSG00000025255 | 1,25E+00  | -2,600671436 | 9,71E-01 | 3,24E-01 | 6,25E-01 | Zfhx4    | 2,38 | No  |
| ENSMUSG00000025277 | -1,66E-01 | -0,485155752 | 2,11E-01 | 6,46E-01 | 8,74E-01 | Abhd6    | 0,89 | No  |
| ENSMUSG00000025278 | -2,25E-01 | 5,938740441  | 1,18E+01 | 5,91E-04 | 1,05E-02 | Flnb     | 0,86 | Yes |
| ENSMUSG00000025279 | -6,78E-01 | -0,573930471 | 3,30E+00 | 6,95E-02 | 3,32E-01 | Dnase1l3 | 0,63 | No  |
| ENSMUSG00000025280 | 1,15E-01  | 4,802024151  | 2,26E+00 | 1,33E-01 | 4,59E-01 | Polr3a   | 1,08 | No  |
| ENSMUSG00000025290 | -8,88E-02 | 6,275013137  | 1,94E+00 | 1,63E-01 | 5,14E-01 | Rps24    | 0,94 | No  |
| ENSMUSG00000025314 | 7,06E-02  | 7,725624819  | 1,44E+00 | 2,30E-01 | 5,50E-01 | Ptprj    | 1,05 | No  |
| ENSMUSG00000025316 | 9,93E-02  | 4,116168658  | 1,34E+00 | 2,47E-01 | 5,50E-01 | Banp     | 1,07 | No  |
| ENSMUSG00000025317 | 2,67E-01  | -2,770639914 | 4,41E-02 | 8,34E-01 | 9,79E-01 | Car5a    | 1,20 | No  |
| ENSMUSG00000025318 | 3,03E-01  | -0,236636932 | 8,23E-01 | 3,64E-01 | 6,65E-01 | Jph3     | 1,23 | No  |

|                    |           |              |          |          |          |         |      |     |
|--------------------|-----------|--------------|----------|----------|----------|---------|------|-----|
| ENSMUSG00000025321 | -3,16E-01 | -1,682983136 | 2,79E-01 | 5,97E-01 | 8,45E-01 | Itgb8   | 0,80 | No  |
| ENSMUSG00000025323 | 2,00E-02  | 3,244663834  | 3,58E-02 | 8,50E-01 | 9,89E-01 | Sp4     | 1,01 | No  |
| ENSMUSG00000025324 | 2,26E-01  | 5,081174734  | 9,46E+00 | 2,09E-03 | 2,90E-02 | Atp10a  | 1,17 | Yes |
| ENSMUSG00000025326 | 1,94E-01  | 6,024378948  | 8,82E+00 | 2,98E-03 | 3,82E-02 | Ube3a   | 1,14 | Yes |
| ENSMUSG00000025328 | 1,33E-01  | -1,127033698 | 9,29E-02 | 7,61E-01 | 9,37E-01 | Padi3   | 1,10 | No  |
| ENSMUSG00000025329 | -2,76E-02 | -2,929311596 | 3,75E-04 | 9,85E-01 | 1,00E+00 | Padi1   | 0,98 | No  |
| ENSMUSG00000025330 | -8,77E-03 | 1,488881195  | 2,47E-03 | 9,60E-01 | 1,00E+00 | Padi4   | 0,99 | No  |
| ENSMUSG00000025337 | -1,70E-01 | 5,368830535  | 5,90E+00 | 1,51E-02 | 1,27E-01 | Sbds    | 0,89 | No  |
| ENSMUSG00000025340 | -1,91E-01 | 5,354410395  | 7,32E+00 | 6,80E-03 | 7,03E-02 | Rabgef1 | 0,88 | No  |
| ENSMUSG00000025348 | -6,21E-02 | -2,033624901 | 8,07E-03 | 9,28E-01 | 1,00E+00 | Itga7   | 0,96 | No  |
| ENSMUSG00000025350 | -1,65E-01 | 1,94360857   | 1,17E+00 | 2,79E-01 | 5,76E-01 | Rdh5    | 0,89 | No  |
| ENSMUSG00000025351 | -5,74E-03 | 6,103523679  | 7,84E-03 | 9,29E-01 | 1,00E+00 | Cd63    | 1,00 | No  |
| ENSMUSG00000025352 | -6,24E-01 | -0,355733976 | 3,38E+00 | 6,60E-02 | 3,23E-01 | Gdf11   | 0,65 | No  |
| ENSMUSG00000025353 | 2,28E-02  | 4,505403065  | 7,97E-02 | 7,78E-01 | 9,47E-01 | Ormdl2  | 1,02 | No  |
| ENSMUSG00000025354 | 2,00E-02  | 6,674673449  | 1,05E-01 | 7,46E-01 | 9,29E-01 | Dnajc14 | 1,01 | No  |
| ENSMUSG00000025355 | 3,97E-03  | 7,427935638  | 4,43E-03 | 9,47E-01 | 1,00E+00 | Mmp19   | 1,00 | No  |
| ENSMUSG00000025357 | -5,72E-01 | 5,599038547  | 7,11E+01 | 3,45E-17 | 6,51E-15 | Dgka    | 0,67 | Yes |
| ENSMUSG00000025358 | -8,82E-02 | 6,284731085  | 1,92E+00 | 1,66E-01 | 5,18E-01 | Cdk2    | 0,94 | No  |
| ENSMUSG00000025359 | -3,78E-01 | 2,446242804  | 8,65E+00 | 3,28E-03 | 4,10E-02 | Pmel    | 0,77 | Yes |
| ENSMUSG00000025362 | -2,52E-01 | 6,164820856  | 1,53E+01 | 9,39E-05 | 2,30E-03 | Rps26   | 0,84 | Yes |
| ENSMUSG00000025364 | 6,86E-02  | 6,065442378  | 1,11E+00 | 2,93E-01 | 5,88E-01 | Pa2g4   | 1,05 | No  |
| ENSMUSG00000025366 | 1,91E-01  | 9,131342126  | 1,13E+01 | 7,57E-04 | 1,29E-02 | Esyt1   | 1,14 | Yes |
| ENSMUSG00000025369 | 2,58E-03  | 7,190372222  | 1,84E-03 | 9,66E-01 | 1,00E+00 | Smarcc2 | 1,00 | No  |
| ENSMUSG00000025370 | -1,87E+00 | -3,107637761 | 1,39E+00 | 2,38E-01 | 5,50E-01 | Cdh9    | 0,27 | No  |
| ENSMUSG00000025371 | 1,37E-01  | 4,678050021  | 3,10E+00 | 7,83E-02 | 3,57E-01 | Chmp6   | 1,10 | No  |
| ENSMUSG00000025372 | 7,95E-03  | 6,296587452  | 1,57E-02 | 9,00E-01 | 1,00E+00 | Baiap2  | 1,01 | No  |
| ENSMUSG00000025373 | 1,37E-01  | 5,652330465  | 4,05E+00 | 4,41E-02 | 2,50E-01 | Rnf41   | 1,10 | No  |
| ENSMUSG00000025374 | -1,16E-01 | 4,86644291   | 2,33E+00 | 1,27E-01 | 4,47E-01 | Nabp2   | 0,92 | No  |
| ENSMUSG00000025375 | 4,04E-01  | 4,69429566   | 2,66E+01 | 2,47E-07 | 1,27E-05 | Aatk    | 1,32 | Yes |
| ENSMUSG00000025377 | 1,45E-01  | 4,977052849  | 3,79E+00 | 5,14E-02 | 2,76E-01 | Tepsin  | 1,11 | No  |
| ENSMUSG00000025380 | -3,36E-01 | -0,338401346 | 8,90E-01 | 3,45E-01 | 6,46E-01 | Fscn2   | 0,79 | No  |
| ENSMUSG00000025381 | -7,05E-02 | 4,966744313  | 8,94E-01 | 3,44E-01 | 6,45E-01 | Cnpy2   | 0,95 | No  |

|                    |           |              |          |          |          |         |      |     |
|--------------------|-----------|--------------|----------|----------|----------|---------|------|-----|
| ENSMUSG00000025383 | -1,25E+00 | -1,801016055 | 3,70E+00 | 5,43E-02 | 2,85E-01 | Il23a   | 0,42 | No  |
| ENSMUSG00000025384 | -3,16E-02 | 4,511629625  | 1,56E-01 | 6,92E-01 | 9,01E-01 | Faap100 | 0,98 | No  |
| ENSMUSG00000025386 | -1,31E+00 | -2,83198662  | 1,06E+00 | 3,02E-01 | 5,99E-01 | Pde6g   | 0,40 | No  |
| ENSMUSG00000025389 | 1,70E-01  | -2,627601804 | 2,44E-02 | 8,76E-01 | 1,00E+00 | Mip     | 1,12 | No  |
| ENSMUSG00000025393 | 6,85E-03  | 9,85476963   | 1,48E-02 | 9,03E-01 | 1,00E+00 | Atp5b   | 1,00 | No  |
| ENSMUSG00000025395 | 2,23E-01  | 3,948165352  | 6,03E+00 | 1,41E-02 | 1,20E-01 | Prim1   | 1,17 | No  |
| ENSMUSG00000025401 | 1,71E-01  | -1,711737954 | 8,89E-02 | 7,66E-01 | 9,40E-01 | Myo1a   | 1,13 | No  |
| ENSMUSG00000025402 | 3,00E-01  | 4,822052695  | 1,58E+01 | 7,07E-05 | 1,82E-03 | Nab2    | 1,23 | Yes |
| ENSMUSG00000025403 | 1,19E-01  | 5,487576828  | 2,94E+00 | 8,66E-02 | 3,78E-01 | Shmt2   | 1,09 | No  |
| ENSMUSG00000025404 | -2,81E-02 | 6,195416295  | 1,91E-01 | 6,62E-01 | 8,83E-01 | R3hdm2  | 0,98 | No  |
| ENSMUSG00000025407 | 3,01E-01  | 0,532896254  | 1,53E+00 | 2,17E-01 | 5,50E-01 | Gli1    | 1,23 | No  |
| ENSMUSG00000025408 | -1,13E-01 | 4,382424948  | 1,91E+00 | 1,67E-01 | 5,21E-01 | Ddit3   | 0,92 | No  |
| ENSMUSG00000025409 | 7,07E-02  | 6,197571449  | 1,22E+00 | 2,69E-01 | 5,65E-01 | Mbd6    | 1,05 | No  |
| ENSMUSG00000025410 | -8,92E-02 | 6,951065781  | 2,15E+00 | 1,43E-01 | 4,77E-01 | Dctn2   | 0,94 | No  |
| ENSMUSG00000025413 | -1,22E-01 | 4,67601466   | 2,49E+00 | 1,15E-01 | 4,18E-01 | Ttc4    | 0,92 | No  |
| ENSMUSG00000025417 | -8,90E-02 | 6,586855571  | 2,05E+00 | 1,53E-01 | 4,95E-01 | Pip4k2c | 0,94 | No  |
| ENSMUSG00000025420 | -5,24E-01 | -2,18554363  | 4,41E-01 | 5,07E-01 | 7,91E-01 | Katnal2 | 0,70 | No  |
| ENSMUSG00000025421 | -3,65E-04 | 4,801053694  | 2,29E-05 | 9,96E-01 | 1,00E+00 | Hdhd2   | 1,00 | No  |
| ENSMUSG00000025422 | 2,03E-01  | 4,640063176  | 6,77E+00 | 9,30E-03 | 8,84E-02 | Agap2   | 1,15 | No  |
| ENSMUSG00000025423 | 6,51E-02  | 4,762647266  | 7,13E-01 | 3,98E-01 | 6,98E-01 | Pias2   | 1,05 | No  |
| ENSMUSG00000025425 | 1,81E+00  | -3,10765737  | 1,28E+00 | 2,58E-01 | 5,50E-01 | St8sia5 | 3,49 | No  |
| ENSMUSG00000025427 | 1,81E+00  | -3,10765737  | 1,28E+00 | 2,58E-01 | 5,50E-01 | Rnf165  | 3,49 | No  |
| ENSMUSG00000025428 | 1,24E-02  | 9,527348965  | 4,81E-02 | 8,26E-01 | 9,75E-01 | Atp5a1  | 1,01 | No  |
| ENSMUSG00000025429 | -8,01E-02 | 4,208587525  | 8,86E-01 | 3,47E-01 | 6,47E-01 | Pstpip2 | 0,95 | No  |
| ENSMUSG00000025431 | 3,41E-01  | 1,590445773  | 3,67E+00 | 5,55E-02 | 2,89E-01 | Crisp1  | 1,27 | No  |
| ENSMUSG00000025432 | -2,54E-01 | -0,367100333 | 6,11E-01 | 4,34E-01 | 7,27E-01 | Avil    | 0,84 | No  |
| ENSMUSG00000025433 | -8,34E-02 | -1,770504141 | 1,78E-02 | 8,94E-01 | 1,00E+00 | Crisp3  | 0,94 | No  |
| ENSMUSG00000025436 | 1,27E-01  | 2,157617313  | 7,79E-01 | 3,77E-01 | 6,78E-01 | Atp23   | 1,09 | No  |
| ENSMUSG00000025437 | -9,32E-03 | 5,628766129  | 1,86E-02 | 8,91E-01 | 1,00E+00 | Usp33   | 0,99 | No  |
| ENSMUSG00000025439 | 3,00E-02  | 5,316236872  | 1,79E-01 | 6,72E-01 | 8,89E-01 | Clns1a  | 1,02 | No  |
| ENSMUSG00000025450 | -1,60E-01 | 2,245893201  | 1,35E+00 | 2,46E-01 | 5,50E-01 | Gm9752  | 0,89 | No  |
| ENSMUSG00000025451 | 1,03E-01  | 5,000250889  | 1,94E+00 | 1,64E-01 | 5,15E-01 | Paip1   | 1,07 | No  |

|                    |           |              |           |          |          |         |      |     |
|--------------------|-----------|--------------|-----------|----------|----------|---------|------|-----|
| ENSMUSG00000025453 | -2,69E-03 | 4,509009188  | 1,12E-03  | 9,73E-01 | 1,00E+00 | Nnt     | 1,00 | No  |
| ENSMUSG00000025464 | 4,55E-01  | 3,041604913  | 1,67E+01  | 4,30E-05 | 1,20E-03 | Paox    | 1,37 | Yes |
| ENSMUSG00000025465 | 7,30E-02  | 6,005548488  | 1,23E+00  | 2,67E-01 | 5,63E-01 | Echs1   | 1,05 | No  |
| ENSMUSG00000025466 | 1,97E-01  | 2,094675288  | 1,80E+00  | 1,80E-01 | 5,41E-01 | Fuom    | 1,15 | No  |
| ENSMUSG00000025467 | -1,25E+00 | -3,070160443 | 7,24E-01  | 3,95E-01 | 6,95E-01 | Prap1   | 0,42 | No  |
| ENSMUSG00000025468 | -6,06E-01 | -2,226321941 | 4,99E-01  | 4,80E-01 | 7,67E-01 | Caly    | 0,66 | No  |
| ENSMUSG00000025470 | -1,27E-01 | 3,779780984  | 1,86E+00  | 1,73E-01 | 5,30E-01 | Zfp511  | 0,92 | No  |
| ENSMUSG00000025473 | -7,65E-02 | 9,481510113  | 1,83E+00  | 1,76E-01 | 5,35E-01 | Adam8   | 0,95 | No  |
| ENSMUSG00000025474 | -2,10E-02 | 5,165034424  | 8,49E-02  | 7,71E-01 | 9,42E-01 | Tubgcp2 | 0,99 | No  |
| ENSMUSG00000025475 | 1,87E+00  | -3,107639691 | 1,38E+00  | 2,40E-01 | 5,50E-01 | Adgra1  | 3,67 | No  |
| ENSMUSG00000025477 | 7,34E-02  | 4,270144445  | 7,51E-01  | 3,86E-01 | 6,87E-01 | Inpp5a  | 1,05 | No  |
| ENSMUSG00000025478 | -1,37E+00 | -1,997878098 | 3,96E+00  | 4,66E-02 | 2,58E-01 | Dpysl4  | 0,39 | No  |
| ENSMUSG00000025479 | -1,89E+00 | -3,033648118 | 1,42E+00  | 2,33E-01 | 5,50E-01 | Cyp2e1  | 0,27 | No  |
| ENSMUSG00000025480 | -3,83E-02 | -3,107651936 | -7,91E-11 | 1,00E+00 | 1,00E+00 | Syce1   | 0,97 | No  |
| ENSMUSG00000025481 | -2,71E+00 | -2,963235336 | 2,92E+00  | 8,75E-02 | 3,78E-01 | Urah    | 0,15 | No  |
| ENSMUSG00000025482 | -6,43E-02 | -2,600633366 | 2,78E-03  | 9,58E-01 | 1,00E+00 | Odf3    | 0,96 | No  |
| ENSMUSG00000025484 | -3,08E-02 | 5,187024786  | 1,82E-01  | 6,69E-01 | 8,88E-01 | Bet1l   | 0,98 | No  |
| ENSMUSG00000025485 | -1,76E-02 | 6,882125426  | 8,32E-02  | 7,73E-01 | 9,44E-01 | Ric8a   | 0,99 | No  |
| ENSMUSG00000025486 | -3,45E-02 | 3,853183174  | 1,43E-01  | 7,06E-01 | 9,07E-01 | Sirt3   | 0,98 | No  |
| ENSMUSG00000025487 | 4,50E-02  | 6,000911352  | 4,69E-01  | 4,93E-01 | 7,79E-01 | Psm13   | 1,03 | No  |
| ENSMUSG00000025488 | -1,87E+00 | -3,03364178  | 1,41E+00  | 2,36E-01 | 5,50E-01 | Cox8b   | 0,27 | No  |
| ENSMUSG00000025489 | -7,76E-01 | -2,205726774 | 7,76E-01  | 3,78E-01 | 6,79E-01 | Ifitm5  | 0,58 | No  |
| ENSMUSG00000025491 | -8,41E-01 | 7,724128077  | 2,00E+02  | 2,45E-45 | 4,33E-42 | Ifitm1  | 0,56 | Yes |
| ENSMUSG00000025492 | -9,42E-01 | 6,772102458  | 2,28E+02  | 2,06E-51 | 5,14E-48 | Ifitm3  | 0,52 | Yes |
| ENSMUSG00000025494 | -2,32E-01 | 3,555815494  | 5,80E+00  | 1,60E-02 | 1,31E-01 | Sigirr  | 0,85 | No  |
| ENSMUSG00000025495 | -9,72E-02 | 4,737936981  | 1,62E+00  | 2,04E-01 | 5,50E-01 | Ptdss2  | 0,93 | No  |
| ENSMUSG00000025496 | -1,87E+00 | -3,03364178  | 1,41E+00  | 2,36E-01 | 5,50E-01 | Drd4    | 0,27 | No  |
| ENSMUSG00000025497 | -1,94E+00 | -3,107619243 | 1,50E+00  | 2,21E-01 | 5,50E-01 | Cdhr5   | 0,26 | No  |
| ENSMUSG00000025498 | -3,63E-01 | 2,987089585  | 1,06E+01  | 1,15E-03 | 1,82E-02 | lrf7    | 0,78 | Yes |
| ENSMUSG00000025499 | 2,43E-02  | 5,522041372  | 1,25E-01  | 7,24E-01 | 9,17E-01 | Hras    | 1,02 | No  |
| ENSMUSG00000025500 | -4,72E-01 | 0,524375864  | 3,71E+00  | 5,42E-02 | 2,85E-01 | Lmtd2   | 0,72 | No  |
| ENSMUSG00000025503 | -1,76E-02 | 7,853459137  | 9,04E-02  | 7,64E-01 | 9,39E-01 | Taldo1  | 0,99 | No  |

|                    |           |              |          |          |          |               |      |     |
|--------------------|-----------|--------------|----------|----------|----------|---------------|------|-----|
| ENSMUSG00000025504 | -1,11E+00 | -0,107406263 | 1,24E+01 | 4,31E-04 | 8,10E-03 | Eps8l2        | 0,46 | Yes |
| ENSMUSG00000025505 | -1,18E-01 | 3,155007805  | 1,22E+00 | 2,70E-01 | 5,67E-01 | Tmem80        | 0,92 | No  |
| ENSMUSG00000025507 | 1,31E-01  | 4,348530104  | 2,54E+00 | 1,11E-01 | 4,09E-01 | Pidd1         | 1,09 | No  |
| ENSMUSG00000025508 | 3,79E-02  | 4,091031088  | 1,88E-01 | 6,65E-01 | 8,84E-01 | Rplp2         | 1,03 | No  |
| ENSMUSG00000025509 | 4,01E-02  | 6,371314842  | 4,00E-01 | 5,27E-01 | 8,04E-01 | Pnpla2        | 1,03 | No  |
| ENSMUSG00000025510 | 3,32E-01  | 5,268940467  | 2,17E+01 | 3,20E-06 | 1,23E-04 | Cd151         | 1,26 | Yes |
| ENSMUSG00000025511 | 2,19E-01  | 4,343609424  | 6,79E+00 | 9,19E-03 | 8,77E-02 | Tspan4        | 1,16 | No  |
| ENSMUSG00000025512 | 1,25E-01  | 5,365533059  | 3,14E+00 | 7,64E-02 | 3,52E-01 | Chid1         | 1,09 | No  |
| ENSMUSG00000025515 | 5,69E-01  | -1,929350851 | 5,49E-01 | 4,59E-01 | 7,48E-01 | Muc2          | 1,48 | No  |
| ENSMUSG00000025519 | -1,88E+00 | -2,770579395 | 1,42E+00 | 2,33E-01 | 5,50E-01 | Tktl2         | 0,27 | No  |
| ENSMUSG00000025521 | 1,58E-01  | 4,868998872  | 4,30E+00 | 3,82E-02 | 2,32E-01 | Tmem192       | 1,12 | No  |
| ENSMUSG00000025532 | -5,56E-03 | 4,491749869  | 4,85E-03 | 9,45E-01 | 1,00E+00 | Crcp          | 1,00 | No  |
| ENSMUSG00000025533 | -6,89E-02 | 4,938639914  | 8,61E-01 | 3,54E-01 | 6,55E-01 | Asl           | 0,95 | No  |
| ENSMUSG00000025534 | 1,65E-01  | 8,603227651  | 8,32E+00 | 3,92E-03 | 4,66E-02 | Gusb          | 1,12 | Yes |
| ENSMUSG00000025537 | 6,84E-02  | -1,43678971  | 1,89E-02 | 8,91E-01 | 1,00E+00 | Phkg1         | 1,05 | No  |
| ENSMUSG00000025538 | 3,04E-01  | 3,569194076  | 9,64E+00 | 1,90E-03 | 2,69E-02 | Sumf2         | 1,23 | Yes |
| ENSMUSG00000025544 | 5,55E-02  | 6,777160931  | 8,13E-01 | 3,67E-01 | 6,68E-01 | Tm9sf2        | 1,04 | No  |
| ENSMUSG00000025545 | 1,83E-01  | 2,833176409  | 2,43E+00 | 1,19E-01 | 4,28E-01 | Clybl         | 1,14 | No  |
| ENSMUSG00000025555 | -7,43E-02 | -0,535437205 | 4,74E-02 | 8,28E-01 | 9,76E-01 | Farp1         | 0,95 | No  |
| ENSMUSG00000025557 | -1,89E+00 | -3,1076441   | 1,42E+00 | 2,33E-01 | 5,50E-01 | Slc15a1       | 0,27 | No  |
| ENSMUSG00000025558 | -8,15E-01 | 3,967545658  | 8,48E+01 | 3,26E-20 | 7,57E-18 | Dock9         | 0,57 | Yes |
| ENSMUSG00000025571 | 1,38E-01  | 5,533872133  | 3,97E+00 | 4,63E-02 | 2,57E-01 | Tnrc6c        | 1,10 | No  |
| ENSMUSG00000025572 | -3,13E-01 | 5,434240295  | 2,05E+01 | 6,00E-06 | 2,13E-04 | Tmc6          | 0,80 | Yes |
| ENSMUSG00000025573 | -3,77E-01 | 0,493427647  | 2,52E+00 | 1,13E-01 | 4,13E-01 | 6030468B19Rik | 0,77 | No  |
| ENSMUSG00000025574 | -3,21E-01 | 5,984881967  | 2,41E+01 | 9,09E-07 | 4,10E-05 | Tk1           | 0,80 | Yes |
| ENSMUSG00000025575 | 3,30E-02  | 6,364165459  | 2,70E-01 | 6,03E-01 | 8,48E-01 | Cant1         | 1,02 | No  |
| ENSMUSG00000025576 | -1,89E+00 | -3,1076441   | 1,42E+00 | 2,33E-01 | 5,50E-01 | Rbfox3        | 0,27 | No  |
| ENSMUSG00000025577 | -8,08E-02 | 2,441912424  | 4,11E-01 | 5,21E-01 | 8,00E-01 | Cbx2          | 0,95 | No  |
| ENSMUSG00000025578 | 7,28E-01  | 1,010171559  | 1,31E+01 | 2,93E-04 | 5,95E-03 | Cbx8          | 1,66 | Yes |
| ENSMUSG00000025579 | 5,71E-02  | 5,937233047  | 7,52E-01 | 3,86E-01 | 6,87E-01 | Gaa           | 1,04 | No  |
| ENSMUSG00000025580 | 3,17E-02  | 4,346480269  | 1,47E-01 | 7,02E-01 | 9,05E-01 | Eif4a3        | 1,02 | No  |
| ENSMUSG00000025582 | -5,40E-02 | -2,832035784 | 1,96E-03 | 9,65E-01 | 1,00E+00 | Nptx1         | 0,96 | No  |



|                    |           |              |           |          |          |               |      |     |
|--------------------|-----------|--------------|-----------|----------|----------|---------------|------|-----|
| ENSMUSG00000025583 | -2,10E-01 | 5,905451847  | 1,02E+01  | 1,38E-03 | 2,09E-02 | Rptor         | 0,86 | Yes |
| ENSMUSG00000025584 | 1,69E-01  | 5,402871968  | 5,73E+00  | 1,67E-02 | 1,35E-01 | Pde8a         | 1,12 | No  |
| ENSMUSG00000025586 | 4,44E-01  | 3,969680646  | 2,43E+01  | 8,35E-07 | 3,81E-05 | Cpeb1         | 1,36 | Yes |
| ENSMUSG00000025588 | 2,62E+00  | -2,963288024 | 2,65E+00  | 1,03E-01 | 3,95E-01 | Nat1          | 6,14 | No  |
| ENSMUSG00000025591 | -1,49E-01 | 6,401175742  | 5,51E+00  | 1,89E-02 | 1,46E-01 | Tma16         | 0,90 | No  |
| ENSMUSG00000025602 | 1,79E-01  | 2,630205217  | 2,04E+00  | 1,53E-01 | 4,96E-01 | Zfp202        | 1,13 | No  |
| ENSMUSG00000025607 | -1,50E-02 | 5,292629233  | 4,46E-02  | 8,33E-01 | 9,78E-01 | Copg2         | 0,99 | No  |
| ENSMUSG00000025608 | -1,32E+00 | -2,655080948 | 1,09E+00  | 2,97E-01 | 5,93E-01 | Podxl         | 0,40 | No  |
| ENSMUSG00000025609 | -1,65E-01 | 5,989663012  | 6,28E+00  | 1,22E-02 | 1,08E-01 | Mkln1         | 0,89 | No  |
| ENSMUSG00000025610 | 9,01E-03  | -3,107646452 | -5,16E-10 | 1,00E+00 | 1,00E+00 | Map3k7cl      | 1,01 | No  |
| ENSMUSG00000025612 | 2,11E-01  | 7,187533025  | 1,22E+01  | 4,67E-04 | 8,68E-03 | Bach1         | 1,16 | Yes |
| ENSMUSG00000025613 | 3,45E-02  | 7,155447938  | 3,28E-01  | 5,67E-01 | 8,29E-01 | Cct8          | 1,02 | No  |
| ENSMUSG00000025616 | -1,15E-01 | 5,548661646  | 2,78E+00  | 9,56E-02 | 3,86E-01 | Usp16         | 0,92 | No  |
| ENSMUSG00000025645 | -2,97E-02 | 2,505975909  | 5,59E-02  | 8,13E-01 | 9,67E-01 | Ccdc51        | 0,98 | No  |
| ENSMUSG00000025646 | 7,88E-02  | 2,979864521  | 4,85E-01  | 4,86E-01 | 7,73E-01 | Atrip         | 1,06 | No  |
| ENSMUSG00000025647 | 1,10E-01  | 7,966617018  | 3,56E+00  | 5,92E-02 | 3,01E-01 | Shisa5        | 1,08 | No  |
| ENSMUSG00000025648 | 2,07E-01  | 5,081487018  | 8,06E+00  | 4,53E-03 | 5,18E-02 | Pfkfb4        | 1,15 | No  |
| ENSMUSG00000025650 | 2,21E-01  | 0,233073196  | 6,30E-01  | 4,27E-01 | 7,21E-01 | Col7a1        | 1,17 | No  |
| ENSMUSG00000025651 | 1,11E-01  | 6,930778143  | 3,33E+00  | 6,81E-02 | 3,28E-01 | Uqcrc1        | 1,08 | No  |
| ENSMUSG00000025652 | -1,73E+00 | -2,448645098 | 3,32E+00  | 6,84E-02 | 3,29E-01 | Tmem89        | 0,30 | No  |
| ENSMUSG00000025701 | -2,36E-01 | 6,699376136  | 1,46E+01  | 1,34E-04 | 3,09E-03 | Alox5         | 0,85 | Yes |
| ENSMUSG00000025702 | 2,46E-01  | 6,833404695  | 1,61E+01  | 6,14E-05 | 1,62E-03 | March8        | 1,19 | Yes |
| ENSMUSG00000025716 | 1,81E+00  | -3,10765737  | 1,28E+00  | 2,58E-01 | 5,50E-01 | Myo3a         | 3,49 | No  |
| ENSMUSG00000025722 | 5,69E-02  | 3,567660109  | 3,42E-01  | 5,59E-01 | 8,22E-01 | Wdr73         | 1,04 | No  |
| ENSMUSG00000025723 | -1,03E+00 | 2,538654612  | 6,54E+01  | 6,03E-16 | 1,02E-13 | Nmb           | 0,49 | Yes |
| ENSMUSG00000025724 | 7,34E-03  | 6,347248065  | 1,33E-02  | 9,08E-01 | 1,00E+00 | Sec11a        | 1,01 | No  |
| ENSMUSG00000025726 | 9,01E-03  | -3,107646452 | -5,16E-10 | 1,00E+00 | 1,00E+00 | Slc28a1       | 1,01 | No  |
| ENSMUSG00000025727 | -3,19E+00 | -2,896088812 | 4,27E+00  | 3,87E-02 | 2,33E-01 | A930017K11Rik | 0,11 | No  |
| ENSMUSG00000025728 | 4,64E-02  | 6,106345637  | 5,13E-01  | 4,74E-01 | 7,62E-01 | Pigq          | 1,03 | No  |
| ENSMUSG00000025730 | -1,39E-02 | 4,480602152  | 2,96E-02  | 8,63E-01 | 9,97E-01 | Rab40c        | 0,99 | No  |
| ENSMUSG00000025731 | -7,04E-02 | 2,309726839  | 2,60E-01  | 6,10E-01 | 8,52E-01 | Mettl26       | 0,95 | No  |
| ENSMUSG00000025732 | 1,11E-01  | 2,127684631  | 5,88E-01  | 4,43E-01 | 7,35E-01 | Mcrip2        | 1,08 | No  |

|                    |           |              |          |          |          |               |      |     |
|--------------------|-----------|--------------|----------|----------|----------|---------------|------|-----|
| ENSMUSG00000025733 | -1,54E-02 | 4,495060088  | 3,69E-02 | 8,48E-01 | 9,88E-01 | Rhot2         | 0,99 | No  |
| ENSMUSG00000025735 | 9,11E-02  | 1,197008114  | 2,18E-01 | 6,40E-01 | 8,70E-01 | Rhbdl1        | 1,07 | No  |
| ENSMUSG00000025736 | 6,47E-02  | 4,748817091  | 7,08E-01 | 4,00E-01 | 6,99E-01 | Jmjd8         | 1,05 | No  |
| ENSMUSG00000025737 | -1,26E-01 | 4,719763307  | 2,66E+00 | 1,03E-01 | 3,95E-01 | Wdr24         | 0,92 | No  |
| ENSMUSG00000025738 | -6,33E-01 | -1,929298422 | 1,01E+00 | 3,15E-01 | 6,15E-01 | Fbxl16        | 0,64 | No  |
| ENSMUSG00000025739 | 2,04E-01  | -0,690315612 | 2,83E-01 | 5,95E-01 | 8,43E-01 | Gng13         | 1,15 | No  |
| ENSMUSG00000025743 | 1,82E-01  | 9,342537036  | 1,03E+01 | 1,30E-03 | 2,00E-02 | Sdc3          | 1,13 | Yes |
| ENSMUSG00000025745 | 5,92E-02  | 6,789424341  | 9,27E-01 | 3,36E-01 | 6,37E-01 | Hadha         | 1,04 | No  |
| ENSMUSG00000025746 | -7,41E-01 | 1,016575134  | 1,23E+01 | 4,63E-04 | 8,61E-03 | Il6           | 0,60 | Yes |
| ENSMUSG00000025747 | 1,85E-01  | 4,521129591  | 5,33E+00 | 2,09E-02 | 1,56E-01 | Tyms          | 1,14 | No  |
| ENSMUSG00000025757 | 4,62E-02  | 5,860429822  | 4,82E-01 | 4,87E-01 | 7,74E-01 | Hspa4l        | 1,03 | No  |
| ENSMUSG00000025758 | 1,81E-01  | 4,620757415  | 5,29E+00 | 2,14E-02 | 1,58E-01 | Plk4          | 1,13 | No  |
| ENSMUSG00000025759 | 1,11E-01  | 3,910417583  | 1,53E+00 | 2,17E-01 | 5,50E-01 | Mfsd8         | 1,08 | No  |
| ENSMUSG00000025762 | -1,86E-02 | 3,928680595  | 4,29E-02 | 8,36E-01 | 9,80E-01 | Larp1b        | 0,99 | No  |
| ENSMUSG00000025764 | 8,75E-02  | 4,850895849  | 1,35E+00 | 2,45E-01 | 5,50E-01 | Jade1         | 1,06 | No  |
| ENSMUSG00000025766 | -1,91E-01 | 2,284404989  | 2,03E+00 | 1,54E-01 | 4,97E-01 | D3Ertd751e    | 0,88 | No  |
| ENSMUSG00000025777 | -4,19E-01 | -2,711738795 | 1,78E-01 | 6,73E-01 | 8,90E-01 | Gdap1         | 0,75 | No  |
| ENSMUSG00000025779 | -1,09E-01 | 2,434098363  | 7,05E-01 | 4,01E-01 | 6,99E-01 | Ly96          | 0,93 | No  |
| ENSMUSG00000025780 | -9,97E-02 | -2,355592991 | 1,13E-02 | 9,15E-01 | 1,00E+00 | Itih5         | 0,93 | No  |
| ENSMUSG00000025781 | 2,60E-02  | 6,57136592   | 1,73E-01 | 6,78E-01 | 8,92E-01 | Atp5c1        | 1,02 | No  |
| ENSMUSG00000025782 | 1,53E-01  | 4,006976204  | 2,92E+00 | 8,75E-02 | 3,78E-01 | Taf3          | 1,11 | No  |
| ENSMUSG00000025783 | 1,17E+00  | -3,14612376  | 6,40E-01 | 4,24E-01 | 7,18E-01 | 4930412O13Rik | 2,26 | No  |
| ENSMUSG00000025784 | -5,55E-02 | -2,401368306 | 4,25E-03 | 9,48E-01 | 1,00E+00 | Clec3b        | 0,96 | No  |
| ENSMUSG00000025785 | -1,35E-01 | 3,584108514  | 2,01E+00 | 1,56E-01 | 5,00E-01 | Exosc7        | 0,91 | No  |
| ENSMUSG00000025786 | -1,23E-01 | 7,033039454  | 4,15E+00 | 4,17E-02 | 2,43E-01 | Zdhhc3        | 0,92 | No  |
| ENSMUSG00000025787 | -8,95E-02 | 2,587946692  | 5,06E-01 | 4,77E-01 | 7,65E-01 | Tgm4          | 0,94 | No  |
| ENSMUSG00000025789 | -1,31E+00 | -2,831997589 | 1,07E+00 | 3,02E-01 | 5,98E-01 | St8sia2       | 0,40 | No  |
| ENSMUSG00000025790 | 6,13E-03  | 5,566504208  | 8,01E-03 | 9,29E-01 | 1,00E+00 | Slco3a1       | 1,00 | No  |
| ENSMUSG00000025791 | 1,53E-01  | 5,506751279  | 4,92E+00 | 2,65E-02 | 1,82E-01 | Pgm2          | 1,11 | No  |
| ENSMUSG00000025792 | -2,04E-01 | 5,347368919  | 8,42E+00 | 3,70E-03 | 4,47E-02 | Slc25a10      | 0,87 | Yes |
| ENSMUSG00000025793 | 3,34E-03  | 5,954795044  | 2,58E-03 | 9,60E-01 | 1,00E+00 | Hgs           | 1,00 | No  |
| ENSMUSG00000025794 | -1,21E-01 | 7,164201169  | 4,05E+00 | 4,43E-02 | 2,51E-01 | Rpl14         | 0,92 | No  |

|                    |           |              |          |          |          |               |      |     |
|--------------------|-----------|--------------|----------|----------|----------|---------------|------|-----|
| ENSMUSG00000025795 | -1,63E-01 | 6,633938049  | 6,95E+00 | 8,40E-03 | 8,22E-02 | Rassf3        | 0,89 | No  |
| ENSMUSG00000025804 | 6,81E-02  | 8,537476819  | 1,40E+00 | 2,37E-01 | 5,50E-01 | Ccr1          | 1,05 | No  |
| ENSMUSG00000025808 | -6,79E-01 | -0,395380527 | 4,03E+00 | 4,46E-02 | 2,51E-01 | Ccdc7a        | 0,62 | No  |
| ENSMUSG00000025809 | -1,89E-01 | 9,32205919   | 1,11E+01 | 8,59E-04 | 1,42E-02 | Itgb1         | 0,88 | Yes |
| ENSMUSG00000025810 | 1,91E-01  | 6,638353702  | 9,38E+00 | 2,19E-03 | 3,01E-02 | Nrp1          | 1,14 | Yes |
| ENSMUSG00000025812 | 1,32E-01  | -2,146174575 | 3,04E-02 | 8,62E-01 | 9,96E-01 | Pard3         | 1,10 | No  |
| ENSMUSG00000025813 | 7,24E-01  | -2,770606383 | 2,86E-01 | 5,93E-01 | 8,42E-01 | Homer2        | 1,65 | No  |
| ENSMUSG00000025815 | 6,02E-02  | -1,033692114 | 1,86E-02 | 8,91E-01 | 1,00E+00 | Dhtkd1        | 1,04 | No  |
| ENSMUSG00000025816 | -1,61E-01 | 4,029072688  | 3,29E+00 | 6,95E-02 | 3,32E-01 | Sec61a2       | 0,89 | No  |
| ENSMUSG00000025817 | -2,01E-03 | 5,133488589  | 7,81E-04 | 9,78E-01 | 1,00E+00 | Nudt5         | 1,00 | No  |
| ENSMUSG00000025821 | 3,14E-01  | 5,117380978  | 1,89E+01 | 1,40E-05 | 4,51E-04 | Zfp282        | 1,24 | Yes |
| ENSMUSG00000025823 | 1,89E-01  | 8,065723362  | 1,05E+01 | 1,19E-03 | 1,88E-02 | Pdia4         | 1,14 | Yes |
| ENSMUSG00000025825 | -3,78E-01 | 5,378161517  | 2,93E+01 | 6,35E-08 | 3,69E-06 | Iscu          | 0,77 | Yes |
| ENSMUSG00000025854 | -2,08E-02 | 7,850000237  | 1,27E-01 | 7,21E-01 | 9,16E-01 | Fam20c        | 0,99 | No  |
| ENSMUSG00000025855 | -1,02E-01 | 1,099680354  | 2,45E-01 | 6,21E-01 | 8,57E-01 | Prkar1b       | 0,93 | No  |
| ENSMUSG00000025856 | -1,22E-01 | 4,270441969  | 2,13E+00 | 1,44E-01 | 4,80E-01 | Pdgfa         | 0,92 | No  |
| ENSMUSG00000025857 | 9,31E-02  | 4,042172767  | 1,10E+00 | 2,93E-01 | 5,89E-01 | Dnaaf5        | 1,07 | No  |
| ENSMUSG00000025858 | 1,29E-01  | 5,164520031  | 3,17E+00 | 7,51E-02 | 3,49E-01 | Get4          | 1,09 | No  |
| ENSMUSG00000025867 | -2,66E+00 | -3,033639428 | 2,81E+00 | 9,35E-02 | 3,83E-01 | Cplx2         | 0,16 | No  |
| ENSMUSG00000025868 | -5,90E-02 | 6,14613661   | 8,34E-01 | 3,61E-01 | 6,63E-01 | Higd2a        | 0,96 | No  |
| ENSMUSG00000025869 | -1,07E-01 | 5,490841094  | 2,42E+00 | 1,20E-01 | 4,31E-01 | Nop16         | 0,93 | No  |
| ENSMUSG00000025870 | 1,52E-01  | 4,486741564  | 3,60E+00 | 5,78E-02 | 2,97E-01 | Arl10         | 1,11 | No  |
| ENSMUSG00000025871 | 6,41E-02  | 6,601317314  | 1,06E+00 | 3,03E-01 | 6,00E-01 | 4833439L19Rik | 1,05 | No  |
| ENSMUSG00000025872 | 4,65E-02  | 5,026147185  | 3,95E-01 | 5,30E-01 | 8,05E-01 | Thoc3         | 1,03 | No  |
| ENSMUSG00000025873 | 2,73E-02  | 6,028629454  | 1,75E-01 | 6,76E-01 | 8,91E-01 | Faf2          | 1,02 | No  |
| ENSMUSG00000025875 | 1,30E-01  | 3,995091369  | 2,12E+00 | 1,46E-01 | 4,83E-01 | Tspan17       | 1,09 | No  |
| ENSMUSG00000025876 | 2,60E-02  | -0,1216012   | 6,52E-03 | 9,36E-01 | 1,00E+00 | Unc5a         | 1,02 | No  |
| ENSMUSG00000025877 | 1,46E-01  | 7,171590142  | 5,90E+00 | 1,51E-02 | 1,27E-01 | Hk3           | 1,11 | No  |
| ENSMUSG00000025878 | -1,05E-01 | 6,121568139  | 2,64E+00 | 1,04E-01 | 3,97E-01 | Uimc1         | 0,93 | No  |
| ENSMUSG00000025880 | 1,69E-01  | 3,312388243  | 2,58E+00 | 1,08E-01 | 4,02E-01 | Smad7         | 1,12 | No  |
| ENSMUSG00000025885 | -9,34E-01 | -0,195464089 | 9,50E+00 | 2,06E-03 | 2,86E-02 | Myo5b         | 0,52 | Yes |
| ENSMUSG00000025887 | -8,60E-01 | -1,472785131 | 2,93E+00 | 8,72E-02 | 3,78E-01 | Casp12        | 0,55 | No  |

|                    |           |              |          |          |          |          |      |     |
|--------------------|-----------|--------------|----------|----------|----------|----------|------|-----|
| ENSMUSG00000025888 | -1,99E-02 | 5,628961091  | 8,55E-02 | 7,70E-01 | 9,42E-01 | Casp1    | 0,99 | No  |
| ENSMUSG00000025892 | 1,87E+00  | -3,107639691 | 1,38E+00 | 2,40E-01 | 5,50E-01 | Gria4    | 3,67 | No  |
| ENSMUSG00000025893 | -1,93E-01 | 2,327118412  | 2,01E+00 | 1,56E-01 | 5,00E-01 | Kbtbd3   | 0,88 | No  |
| ENSMUSG00000025894 | -3,40E-02 | 3,866585711  | 1,40E-01 | 7,09E-01 | 9,09E-01 | Aasdhppt | 0,98 | No  |
| ENSMUSG00000025898 | -6,43E-02 | 4,100878164  | 5,56E-01 | 4,56E-01 | 7,45E-01 | Cwf19l2  | 0,96 | No  |
| ENSMUSG00000025899 | 2,62E-02  | 3,64909982   | 7,36E-02 | 7,86E-01 | 9,52E-01 | Alkbh8   | 1,02 | No  |
| ENSMUSG00000025902 | -1,89E+00 | -3,1076441   | 1,42E+00 | 2,33E-01 | 5,50E-01 | Sox17    | 0,27 | No  |
| ENSMUSG00000025903 | 6,33E-02  | 5,938751958  | 9,27E-01 | 3,36E-01 | 6,37E-01 | Lypla1   | 1,04 | No  |
| ENSMUSG00000025907 | -1,56E-02 | 5,578810584  | 5,25E-02 | 8,19E-01 | 9,71E-01 | Rb1cc1   | 0,99 | No  |
| ENSMUSG00000025909 | 3,11E+00  | -2,963280805 | 3,94E+00 | 4,72E-02 | 2,60E-01 | Sntg1    | 8,63 | No  |
| ENSMUSG00000025911 | 1,23E-01  | 0,7529299    | 3,04E-01 | 5,81E-01 | 8,37E-01 | Adhfe1   | 1,09 | No  |
| ENSMUSG00000025912 | 4,60E-01  | 2,435087642  | 1,26E+01 | 3,81E-04 | 7,35E-03 | Mybl1    | 1,38 | Yes |
| ENSMUSG00000025915 | 1,95E-01  | 5,809584812  | 8,54E+00 | 3,47E-03 | 4,27E-02 | Sgk3     | 1,14 | Yes |
| ENSMUSG00000025916 | 6,24E-01  | -2,74087404  | 3,21E-01 | 5,71E-01 | 8,32E-01 | Ppp1r42  | 1,54 | No  |
| ENSMUSG00000025917 | -4,09E-02 | 5,822369819  | 3,76E-01 | 5,40E-01 | 8,10E-01 | Cops5    | 0,97 | No  |
| ENSMUSG00000025920 | -3,46E-01 | 2,762435031  | 8,66E+00 | 3,25E-03 | 4,07E-02 | Stau2    | 0,79 | Yes |
| ENSMUSG00000025921 | 3,21E-02  | 2,444901128  | 5,87E-02 | 8,09E-01 | 9,65E-01 | Rdh10    | 1,02 | No  |
| ENSMUSG00000025922 | -5,10E-01 | 4,652930637  | 4,27E+01 | 6,52E-11 | 6,35E-09 | Gm5045   | 0,70 | Yes |
| ENSMUSG00000025925 | -1,03E-01 | 3,254964761  | 9,52E-01 | 3,29E-01 | 6,30E-01 | Terf1    | 0,93 | No  |
| ENSMUSG00000025927 | -1,87E+00 | -3,03364178  | 1,41E+00 | 2,36E-01 | 5,50E-01 | Tfap2b   | 0,27 | No  |
| ENSMUSG00000025930 | -9,89E-01 | -2,44871126  | 1,51E+00 | 2,20E-01 | 5,50E-01 | Msc      | 0,50 | No  |
| ENSMUSG00000025931 | -1,50E-01 | 2,673939016  | 1,57E+00 | 2,10E-01 | 5,50E-01 | Paqr8    | 0,90 | No  |
| ENSMUSG00000025932 | -2,80E-01 | 0,929629372  | 1,76E+00 | 1,85E-01 | 5,49E-01 | Eya1     | 0,82 | No  |
| ENSMUSG00000025933 | -2,89E-01 | 0,794242266  | 1,72E+00 | 1,90E-01 | 5,50E-01 | Tmem14a  | 0,82 | No  |
| ENSMUSG00000025934 | -8,12E-02 | -0,042796778 | 7,15E-02 | 7,89E-01 | 9,54E-01 | Gsta3    | 0,95 | No  |
| ENSMUSG00000025935 | 1,72E-01  | 6,808042848  | 7,80E+00 | 5,21E-03 | 5,76E-02 | Tram1    | 1,13 | No  |
| ENSMUSG00000025936 | -3,04E-01 | 0,87814419   | 2,32E+00 | 1,27E-01 | 4,47E-01 | Gm4956   | 0,81 | No  |
| ENSMUSG00000025937 | 1,18E-01  | 4,294317709  | 2,01E+00 | 1,56E-01 | 5,01E-01 | Lactb2   | 1,09 | No  |
| ENSMUSG00000025938 | -8,90E-01 | 4,603354293  | 1,27E+02 | 2,05E-29 | 1,06E-26 | Slco5a1  | 0,54 | Yes |
| ENSMUSG00000025939 | -6,78E-02 | 5,004982927  | 8,46E-01 | 3,58E-01 | 6,59E-01 | Ube2w    | 0,95 | No  |
| ENSMUSG00000025940 | -2,16E-01 | 5,310929786  | 9,49E+00 | 2,07E-03 | 2,88E-02 | Tmem70   | 0,86 | Yes |
| ENSMUSG00000025946 | 4,81E-01  | -2,832017219 | 1,83E-01 | 6,69E-01 | 8,87E-01 | Pth2r    | 1,40 | No  |

|                    |           |              |          |          |          |               |      |     |
|--------------------|-----------|--------------|----------|----------|----------|---------------|------|-----|
| ENSMUSG00000025949 | 3,20E-02  | 6,85959201   | 2,74E-01 | 6,00E-01 | 8,47E-01 | Pikfyve       | 1,02 | No  |
| ENSMUSG00000025950 | -5,23E-02 | 7,685747509  | 7,91E-01 | 3,74E-01 | 6,75E-01 | Idh1          | 0,96 | No  |
| ENSMUSG00000025955 | -2,25E-01 | 0,43253918   | 7,77E-01 | 3,78E-01 | 6,79E-01 | Akr1cl        | 0,86 | No  |
| ENSMUSG00000025956 | -3,33E-02 | 4,214090162  | 1,57E-01 | 6,92E-01 | 9,00E-01 | Mettl21a      | 0,98 | No  |
| ENSMUSG00000025958 | 4,18E-02  | 6,239497397  | 4,28E-01 | 5,13E-01 | 7,95E-01 | Creb1         | 1,03 | No  |
| ENSMUSG00000025959 | -1,48E-01 | 6,182905349  | 5,12E+00 | 2,36E-02 | 1,69E-01 | Klf7          | 0,90 | No  |
| ENSMUSG00000025961 | -6,07E-02 | -2,770596883 | 2,49E-03 | 9,60E-01 | 1,00E+00 | 4933402D24Rik | 0,96 | No  |
| ENSMUSG00000025962 | 1,09E-01  | 3,95497563   | 1,48E+00 | 2,23E-01 | 5,50E-01 | Fastkd2       | 1,08 | No  |
| ENSMUSG00000025963 | 1,85E+00  | -3,107657832 | 1,35E+00 | 2,46E-01 | 5,50E-01 | Mdh1b         | 3,61 | No  |
| ENSMUSG00000025964 | -3,46E-01 | 7,298919475  | 3,36E+01 | 6,85E-09 | 4,91E-07 | Adam23        | 0,79 | Yes |
| ENSMUSG00000025967 | -1,77E-01 | 7,952049073  | 9,25E+00 | 2,36E-03 | 3,20E-02 | Eef1b2        | 0,88 | Yes |
| ENSMUSG00000025968 | 1,34E-01  | 6,066671184  | 4,23E+00 | 3,97E-02 | 2,36E-01 | Ndufs1        | 1,10 | No  |
| ENSMUSG00000025969 | 1,57E-01  | 9,086534828  | 7,61E+00 | 5,82E-03 | 6,26E-02 | Nrp2          | 1,11 | No  |
| ENSMUSG00000025971 | -5,50E-02 | 3,807180294  | 3,48E-01 | 5,55E-01 | 8,20E-01 | Maip1         | 0,96 | No  |
| ENSMUSG00000025977 | 1,55E+00  | -2,185621666 | 3,62E+00 | 5,72E-02 | 2,94E-01 | Boll          | 2,94 | No  |
| ENSMUSG00000025978 | -1,38E-02 | -0,268121865 | 2,01E-03 | 9,64E-01 | 1,00E+00 | Rftn2         | 0,99 | No  |
| ENSMUSG00000025979 | 8,35E-02  | 4,823735678  | 1,20E+00 | 2,73E-01 | 5,70E-01 | Mob4          | 1,06 | No  |
| ENSMUSG00000025980 | 1,12E-01  | 6,272581013  | 3,06E+00 | 8,03E-02 | 3,63E-01 | Hspd1         | 1,08 | No  |
| ENSMUSG00000025981 | -8,65E-02 | 4,51805592   | 1,16E+00 | 2,82E-01 | 5,78E-01 | Coq10b        | 0,94 | No  |
| ENSMUSG00000025982 | -1,25E-01 | 8,680055491  | 4,75E+00 | 2,92E-02 | 1,95E-01 | Sf3b1         | 0,92 | No  |
| ENSMUSG00000025983 | -6,12E-02 | -2,033623443 | 6,95E-03 | 9,34E-01 | 1,00E+00 | Ccdc150       | 0,96 | No  |
| ENSMUSG00000025986 | 3,27E-01  | 5,199738161  | 2,05E+01 | 6,01E-06 | 2,13E-04 | Slc39a10      | 1,25 | Yes |
| ENSMUSG00000025993 | 2,76E-01  | 3,973390378  | 9,56E+00 | 1,99E-03 | 2,79E-02 | Slc40a1       | 1,21 | Yes |
| ENSMUSG00000025995 | 1,17E-01  | 5,145501574  | 2,58E+00 | 1,08E-01 | 4,04E-01 | Wdr75         | 1,08 | No  |
| ENSMUSG00000025997 | 1,63E-01  | 3,873350183  | 3,29E+00 | 6,98E-02 | 3,33E-01 | Ikzf2         | 1,12 | No  |
| ENSMUSG00000026000 | -3,51E-01 | 3,866698859  | 1,50E+01 | 1,05E-04 | 2,53E-03 | Lancl1        | 0,78 | Yes |
| ENSMUSG00000026003 | -4,40E-02 | 6,221129422  | 4,72E-01 | 4,92E-01 | 7,78E-01 | Acadl         | 0,97 | No  |
| ENSMUSG00000026004 | 1,04E-01  | 2,980936369  | 8,43E-01 | 3,59E-01 | 6,60E-01 | Kansl1l       | 1,07 | No  |
| ENSMUSG00000026005 | 4,56E-02  | 5,661332574  | 4,53E-01 | 5,01E-01 | 7,86E-01 | Rpe           | 1,03 | No  |
| ENSMUSG00000026009 | -1,09E+00 | 2,8732384    | 8,91E+01 | 3,75E-21 | 9,37E-19 | Icos          | 0,47 | Yes |
| ENSMUSG00000026011 | 1,26E+00  | -2,896169772 | 9,87E-01 | 3,21E-01 | 6,21E-01 | Ctla4         | 2,39 | No  |
| ENSMUSG00000026012 | -3,74E-01 | 4,081223052  | 1,75E+01 | 2,92E-05 | 8,56E-04 | Cd28          | 0,77 | Yes |

|                    |           |              |          |          |          |               |      |     |
|--------------------|-----------|--------------|----------|----------|----------|---------------|------|-----|
| ENSMUSG00000026014 | 3,56E-01  | 6,060188069  | 2,97E+01 | 5,05E-08 | 3,01E-06 | Raph1         | 1,28 | Yes |
| ENSMUSG00000026017 | 1,32E-01  | 3,032061701  | 1,37E+00 | 2,41E-01 | 5,50E-01 | Carf          | 1,10 | No  |
| ENSMUSG00000026018 | 4,38E-02  | 2,987614723  | 1,49E-01 | 7,00E-01 | 9,04E-01 | Ica1l         | 1,03 | No  |
| ENSMUSG00000026019 | 8,15E-02  | 3,311134944  | 6,28E-01 | 4,28E-01 | 7,22E-01 | Wdr12         | 1,06 | No  |
| ENSMUSG00000026020 | -4,22E-02 | 5,346949363  | 3,57E-01 | 5,50E-01 | 8,17E-01 | Nop58         | 0,97 | No  |
| ENSMUSG00000026021 | -1,77E-01 | 5,733767553  | 6,93E+00 | 8,50E-03 | 8,28E-02 | Sumo1         | 0,88 | No  |
| ENSMUSG00000026023 | -1,89E-01 | -1,683085568 | 9,62E-02 | 7,56E-01 | 9,35E-01 | Cdk15         | 0,88 | No  |
| ENSMUSG00000026024 | 1,66E-01  | 5,611111198  | 5,97E+00 | 1,45E-02 | 1,23E-01 | Als2          | 1,12 | No  |
| ENSMUSG00000026027 | 9,07E-02  | 4,001273097  | 1,04E+00 | 3,07E-01 | 6,04E-01 | Stradb        | 1,06 | No  |
| ENSMUSG00000026028 | 3,81E-03  | 6,202414261  | 3,52E-03 | 9,53E-01 | 1,00E+00 | Trak2         | 1,00 | No  |
| ENSMUSG00000026029 | 3,61E-02  | 6,717797944  | 3,41E-01 | 5,59E-01 | 8,22E-01 | Casp8         | 1,03 | No  |
| ENSMUSG00000026031 | -4,97E-02 | 6,907435849  | 6,69E-01 | 4,14E-01 | 7,09E-01 | Cflar         | 0,97 | No  |
| ENSMUSG00000026032 | 3,51E-02  | 4,218825427  | 1,71E-01 | 6,80E-01 | 8,93E-01 | Ndufb3        | 1,02 | No  |
| ENSMUSG00000026034 | -1,45E-01 | 6,22161222   | 5,13E+00 | 2,35E-02 | 1,68E-01 | Clk1          | 0,90 | No  |
| ENSMUSG00000026035 | 1,17E-01  | 3,284196232  | 1,26E+00 | 2,61E-01 | 5,55E-01 | Ppil3         | 1,08 | No  |
| ENSMUSG00000026036 | 4,93E-02  | 4,335400529  | 3,52E-01 | 5,53E-01 | 8,19E-01 | Nif3l1        | 1,03 | No  |
| ENSMUSG00000026037 | 1,51E-01  | 4,522064277  | 3,56E+00 | 5,91E-02 | 3,01E-01 | Orc2          | 1,11 | No  |
| ENSMUSG00000026039 | 4,13E-01  | 3,381321102  | 1,64E+01 | 5,01E-05 | 1,36E-03 | Sgo2a         | 1,33 | Yes |
| ENSMUSG00000026042 | -3,36E+00 | -1,655023646 | 2,15E+01 | 3,54E-06 | 1,35E-04 | Col5a2        | 0,10 | Yes |
| ENSMUSG00000026043 | -1,42E+00 | -1,800908471 | 5,11E+00 | 2,38E-02 | 1,69E-01 | Col3a1        | 0,37 | No  |
| ENSMUSG00000026047 | 1,16E-01  | 3,93257439   | 1,68E+00 | 1,95E-01 | 5,50E-01 | Kdelc1        | 1,08 | No  |
| ENSMUSG00000026048 | -1,25E-02 | 4,681696002  | 2,59E-02 | 8,72E-01 | 1,00E+00 | Ercc5         | 0,99 | No  |
| ENSMUSG00000026049 | 6,32E-02  | 3,146558696  | 3,37E-01 | 5,61E-01 | 8,24E-01 | Tex30         | 1,04 | No  |
| ENSMUSG00000026051 | -4,79E-01 | -1,510070135 | 7,05E-01 | 4,01E-01 | 6,99E-01 | 1500015010Rik | 0,72 | No  |
| ENSMUSG00000026062 | -4,72E-01 | 0,911367873  | 4,47E+00 | 3,45E-02 | 2,19E-01 | Slc9a2        | 0,72 | No  |
| ENSMUSG00000026064 | 1,63E-01  | 5,852941815  | 5,99E+00 | 1,44E-02 | 1,22E-01 | Ptp4a1        | 1,12 | No  |
| ENSMUSG00000026065 | 1,09E-02  | 2,409494828  | 6,62E-03 | 9,35E-01 | 1,00E+00 | Slc9a4        | 1,01 | No  |
| ENSMUSG00000026068 | 3,78E-01  | 4,904928171  | 2,55E+01 | 4,52E-07 | 2,18E-05 | Il18rap       | 1,30 | Yes |
| ENSMUSG00000026069 | 4,37E-01  | 5,235223651  | 3,69E+01 | 1,24E-09 | 9,95E-08 | Il1r1l        | 1,35 | Yes |
| ENSMUSG00000026070 | 8,15E-02  | 4,117076908  | 9,25E-01 | 3,36E-01 | 6,37E-01 | Il18r1        | 1,06 | No  |
| ENSMUSG00000026072 | 4,59E-01  | 3,150243995  | 1,79E+01 | 2,27E-05 | 6,95E-04 | Il1r1         | 1,37 | Yes |
| ENSMUSG00000026073 | -5,68E-01 | 6,641005555  | 8,06E+01 | 2,72E-19 | 5,91E-17 | Il1r2         | 0,67 | Yes |

|                    |           |              |          |          |          |               |      |     |
|--------------------|-----------|--------------|----------|----------|----------|---------------|------|-----|
| ENSMUSG00000026074 | -4,34E-01 | 7,67246348   | 5,43E+01 | 1,70E-13 | 2,27E-11 | Map4k4        | 0,74 | Yes |
| ENSMUSG00000026077 | -9,27E-01 | 0,496246473  | 1,36E+01 | 2,21E-04 | 4,72E-03 | Npas2         | 0,53 | Yes |
| ENSMUSG00000026078 | -1,64E-03 | 5,287838102  | 5,36E-04 | 9,82E-01 | 1,00E+00 | Pdcl3         | 1,00 | No  |
| ENSMUSG00000026080 | 5,12E-03  | 1,633603441  | 8,59E-04 | 9,77E-01 | 1,00E+00 | Chst10        | 1,00 | No  |
| ENSMUSG00000026082 | 1,05E-01  | 4,584686218  | 1,74E+00 | 1,87E-01 | 5,50E-01 | Rev1          | 1,08 | No  |
| ENSMUSG00000026083 | 3,82E-02  | 6,980201037  | 3,93E-01 | 5,31E-01 | 8,05E-01 | Eif5b         | 1,03 | No  |
| ENSMUSG00000026087 | -1,20E-01 | 3,84085513   | 1,73E+00 | 1,88E-01 | 5,50E-01 | Mrpl30        | 0,92 | No  |
| ENSMUSG00000026088 | 3,17E-01  | 3,162355065  | 8,81E+00 | 3,00E-03 | 3,83E-02 | Mitd1         | 1,25 | Yes |
| ENSMUSG00000026090 | -2,69E-01 | 0,191129937  | 1,06E+00 | 3,02E-01 | 5,99E-01 | 2010300C02Rik | 0,83 | No  |
| ENSMUSG00000026094 | -6,74E-03 | 7,574973416  | 1,30E-02 | 9,09E-01 | 1,00E+00 | Stk17b        | 1,00 | No  |
| ENSMUSG00000026095 | -6,28E-02 | 5,797937095  | 8,85E-01 | 3,47E-01 | 6,48E-01 | Asnsd1        | 0,96 | No  |
| ENSMUSG00000026096 | -2,57E-02 | 2,524950169  | 4,03E-02 | 8,41E-01 | 9,84E-01 | Osgepl1       | 0,98 | No  |
| ENSMUSG00000026097 | 1,18E-01  | 4,603125793  | 2,24E+00 | 1,34E-01 | 4,61E-01 | Ormdl1        | 1,09 | No  |
| ENSMUSG00000026098 | 9,28E-02  | 2,274124734  | 4,75E-01 | 4,91E-01 | 7,77E-01 | Pms1          | 1,07 | No  |
| ENSMUSG00000026102 | 2,58E-02  | 3,016748102  | 5,28E-02 | 8,18E-01 | 9,70E-01 | Inpp1         | 1,02 | No  |
| ENSMUSG00000026103 | -1,93E-02 | 7,522408     | 1,06E-01 | 7,44E-01 | 9,29E-01 | Gls           | 0,99 | No  |
| ENSMUSG00000026104 | -8,38E-02 | 6,285393726  | 1,75E+00 | 1,86E-01 | 5,50E-01 | Stat1         | 0,94 | No  |
| ENSMUSG00000026107 | -2,94E-01 | 8,789589607  | 2,65E+01 | 2,67E-07 | 1,35E-05 | Nabp1         | 0,82 | Yes |
| ENSMUSG00000026109 | -1,09E-02 | -2,896111597 | 8,93E-05 | 9,92E-01 | 1,00E+00 | Tmeff2        | 0,99 | No  |
| ENSMUSG00000026110 | -1,11E-01 | 6,85568852   | 3,28E+00 | 7,03E-02 | 3,35E-01 | Mgat4a        | 0,93 | No  |
| ENSMUSG00000026111 | -9,09E-02 | 5,136192942  | 1,57E+00 | 2,10E-01 | 5,50E-01 | Unc50         | 0,94 | No  |
| ENSMUSG00000026112 | -6,96E-02 | 7,85817966   | 1,42E+00 | 2,33E-01 | 5,50E-01 | Coa5          | 0,95 | No  |
| ENSMUSG00000026113 | 2,15E-01  | 5,852923123  | 1,05E+01 | 1,22E-03 | 1,91E-02 | Inpp4a        | 1,16 | Yes |
| ENSMUSG00000026114 | -1,83E+00 | -2,14603272  | 5,28E+00 | 2,15E-02 | 1,58E-01 | Cnga3         | 0,28 | No  |
| ENSMUSG00000026116 | -2,89E-01 | 7,615023063  | 2,40E+01 | 9,58E-07 | 4,27E-05 | Tmem131       | 0,82 | Yes |
| ENSMUSG00000026117 | 4,34E-01  | -2,711749443 | 1,47E-01 | 7,01E-01 | 9,05E-01 | Zap70         | 1,35 | No  |
| ENSMUSG00000026121 | -5,46E-01 | 2,719806863  | 2,03E+01 | 6,74E-06 | 2,35E-04 | Sema4c        | 0,69 | Yes |
| ENSMUSG00000026123 | -5,32E-02 | 8,021926948  | 8,38E-01 | 3,60E-01 | 6,61E-01 | Plekhb2       | 0,96 | No  |
| ENSMUSG00000026126 | -5,99E-02 | 3,996308918  | 4,49E-01 | 5,03E-01 | 7,88E-01 | Ptpn18        | 0,96 | No  |
| ENSMUSG00000026127 | 3,73E-02  | 6,021155994  | 3,26E-01 | 5,68E-01 | 8,30E-01 | Imp4          | 1,03 | No  |
| ENSMUSG00000026131 | 2,83E-01  | 7,374100658  | 2,24E+01 | 2,20E-06 | 8,82E-05 | Dst           | 1,22 | Yes |
| ENSMUSG00000026134 | 2,36E-02  | 4,087207445  | 7,22E-02 | 7,88E-01 | 9,53E-01 | Prim2         | 1,02 | No  |

|                    |           |              |           |          |          |         |      |     |
|--------------------|-----------|--------------|-----------|----------|----------|---------|------|-----|
| ENSMUSG00000026135 | 1,52E-01  | 4,938261216  | 4,18E+00  | 4,09E-02 | 2,40E-01 | Zfp142  | 1,11 | No  |
| ENSMUSG00000026141 | 3,14E-02  | -3,107617333 | -7,69E-10 | 1,00E+00 | 1,00E+00 | Col19a1 | 1,02 | No  |
| ENSMUSG00000026142 | 9,23E-02  | 5,370827101  | 1,72E+00  | 1,89E-01 | 5,50E-01 | Rhbdd1  | 1,07 | No  |
| ENSMUSG00000026147 | -2,71E+00 | -2,896102977 | 2,90E+00  | 8,85E-02 | 3,79E-01 | Col9a1  | 0,15 | No  |
| ENSMUSG00000026149 | 7,39E-01  | -2,770612239 | 2,97E-01  | 5,86E-01 | 8,39E-01 | Tm4sf20 | 1,67 | No  |
| ENSMUSG00000026150 | -9,31E-02 | 6,317617862  | 2,14E+00  | 1,44E-01 | 4,79E-01 | Mff     | 0,94 | No  |
| ENSMUSG00000026153 | 2,04E-01  | 2,051294612  | 1,83E+00  | 1,76E-01 | 5,36E-01 | Fam135a | 1,15 | No  |
| ENSMUSG00000026154 | -4,04E-02 | 2,712839933  | 1,08E-01  | 7,42E-01 | 9,27E-01 | Sdhaf4  | 0,97 | No  |
| ENSMUSG00000026155 | 5,09E-02  | 5,119085467  | 4,91E-01  | 4,83E-01 | 7,71E-01 | Smap1   | 1,04 | No  |
| ENSMUSG00000026156 | 2,32E-02  | 4,382581292  | 7,94E-02  | 7,78E-01 | 9,47E-01 | B3gat2  | 1,02 | No  |
| ENSMUSG00000026158 | -4,55E-01 | 6,501384343  | 5,30E+01  | 3,34E-13 | 4,37E-11 | Ogfrl1  | 0,73 | Yes |
| ENSMUSG00000026159 | -4,60E-02 | 6,710171408  | 5,54E-01  | 4,57E-01 | 7,46E-01 | Agfg1   | 0,97 | No  |
| ENSMUSG00000026162 | 1,87E-02  | 2,011075967  | 1,55E-02  | 9,01E-01 | 1,00E+00 | Nhej1   | 1,01 | No  |
| ENSMUSG00000026166 | -2,70E+00 | -3,033614577 | 2,89E+00  | 8,93E-02 | 3,79E-01 | Ccl20   | 0,15 | No  |
| ENSMUSG00000026167 | -9,70E-01 | -2,655145946 | 8,25E-01  | 3,64E-01 | 6,65E-01 | Wnt10a  | 0,51 | No  |
| ENSMUSG00000026170 | 1,84E-01  | 4,696625415  | 5,54E+00  | 1,85E-02 | 1,44E-01 | Cyp27a1 | 1,14 | No  |
| ENSMUSG00000026171 | 2,05E-02  | 3,8750035    | 5,07E-02  | 8,22E-01 | 9,72E-01 | Rnf25   | 1,01 | No  |
| ENSMUSG00000026172 | 1,06E-02  | 3,116504779  | 9,38E-03  | 9,23E-01 | 1,00E+00 | Bcs1l   | 1,01 | No  |
| ENSMUSG00000026173 | 3,11E-01  | 1,413844391  | 2,99E+00  | 8,37E-02 | 3,71E-01 | Plcd4   | 1,24 | No  |
| ENSMUSG00000026174 | 1,44E-01  | 6,254113957  | 5,07E+00  | 2,43E-02 | 1,71E-01 | Cnot9   | 1,11 | No  |
| ENSMUSG00000026175 | 3,57E-01  | -1,711698178 | 3,23E-01  | 5,70E-01 | 8,31E-01 | Vil1    | 1,28 | No  |
| ENSMUSG00000026176 | -1,70E-02 | 6,218679293  | 7,01E-02  | 7,91E-01 | 9,55E-01 | Ctdsp1  | 0,99 | No  |
| ENSMUSG00000026177 | 7,48E-02  | 5,51332427   | 1,16E+00  | 2,80E-01 | 5,77E-01 | Slc11a1 | 1,05 | No  |
| ENSMUSG00000026179 | -5,08E-01 | 5,494459331  | 5,54E+01  | 9,99E-14 | 1,37E-11 | Pnkd    | 0,70 | Yes |
| ENSMUSG00000026180 | -2,10E-01 | 2,385408185  | 2,51E+00  | 1,13E-01 | 4,15E-01 | Cxcr2   | 0,86 | No  |
| ENSMUSG00000026181 | -1,08E-01 | 5,270979021  | 2,31E+00  | 1,28E-01 | 4,50E-01 | Ppm1f   | 0,93 | No  |
| ENSMUSG00000026185 | -1,89E+00 | -2,401225495 | 4,16E+00  | 4,13E-02 | 2,41E-01 | Igfbp5  | 0,27 | No  |
| ENSMUSG00000026187 | 4,49E-02  | -0,126619774 | 2,22E-02  | 8,81E-01 | 1,00E+00 | Xrcc5   | 1,03 | No  |
| ENSMUSG00000026188 | -2,11E-01 | -1,963268022 | 1,09E-01  | 7,42E-01 | 9,27E-01 | Tmem169 | 0,86 | No  |
| ENSMUSG00000026189 | -1,52E-01 | 0,742282046  | 4,82E-01  | 4,88E-01 | 7,75E-01 | Pecr    | 0,90 | No  |
| ENSMUSG00000026192 | 1,24E-01  | 6,535965291  | 3,91E+00  | 4,79E-02 | 2,63E-01 | Atic    | 1,09 | No  |
| ENSMUSG00000026193 | 2,76E-01  | 9,803172564  | 2,40E+01  | 9,78E-07 | 4,35E-05 | Fn1     | 1,21 | Yes |



|                    |           |              |          |          |          |               |      |     |
|--------------------|-----------|--------------|----------|----------|----------|---------------|------|-----|
| ENSMUSG00000026196 | 4,56E-01  | 3,698618481  | 2,25E+01 | 2,07E-06 | 8,38E-05 | Bard1         | 1,37 | Yes |
| ENSMUSG00000026197 | -1,81E-02 | 3,391156786  | 3,18E-02 | 8,58E-01 | 9,94E-01 | Zfand2b       | 0,99 | No  |
| ENSMUSG00000026198 | 3,42E-01  | 1,822656009  | 4,53E+00 | 3,32E-02 | 2,14E-01 | Abcb6         | 1,27 | No  |
| ENSMUSG00000026199 | 6,19E-02  | 4,641809542  | 6,27E-01 | 4,29E-01 | 7,22E-01 | Ankzf1        | 1,04 | No  |
| ENSMUSG00000026200 | 1,33E-01  | 3,853967543  | 2,11E+00 | 1,47E-01 | 4,85E-01 | Glb1l         | 1,10 | No  |
| ENSMUSG00000026201 | 9,67E-02  | 5,099444178  | 1,75E+00 | 1,86E-01 | 5,50E-01 | Stk16         | 1,07 | No  |
| ENSMUSG00000026202 | 2,05E-01  | 6,103887182  | 9,91E+00 | 1,64E-03 | 2,39E-02 | Tuba4a        | 1,15 | Yes |
| ENSMUSG00000026203 | -2,69E-01 | 3,230338764  | 6,62E+00 | 1,01E-02 | 9,39E-02 | Dnajb2        | 0,83 | No  |
| ENSMUSG00000026204 | 2,45E-01  | -0,567753184 | 4,58E-01 | 4,99E-01 | 7,84E-01 | Ptprn         | 1,19 | No  |
| ENSMUSG00000026205 | 1,78E+00  | -1,683309727 | 7,98E+00 | 4,73E-03 | 5,36E-02 | Slc23a3       | 3,44 | No  |
| ENSMUSG00000026207 | 3,10E-01  | 5,922152086  | 2,19E+01 | 2,94E-06 | 1,14E-04 | Speg          | 1,24 | Yes |
| ENSMUSG00000026208 | 1,87E+00  | -3,107639691 | 1,38E+00 | 2,40E-01 | 5,50E-01 | Des           | 3,67 | No  |
| ENSMUSG00000026209 | 1,66E-03  | 4,808356647  | 4,74E-04 | 9,83E-01 | 1,00E+00 | Dnpep         | 1,00 | No  |
| ENSMUSG00000026211 | -3,00E-01 | -1,397700658 | 3,11E-01 | 5,77E-01 | 8,35E-01 | Obsl1         | 0,81 | No  |
| ENSMUSG00000026213 | 1,43E-01  | 6,373384824  | 5,05E+00 | 2,46E-02 | 1,73E-01 | Stk11ip       | 1,10 | No  |
| ENSMUSG00000026219 | -1,11E-01 | 8,637325087  | 3,76E+00 | 5,25E-02 | 2,79E-01 | Trip12        | 0,93 | No  |
| ENSMUSG00000026220 | 3,23E-01  | 2,867875718  | 7,51E+00 | 6,15E-03 | 6,54E-02 | Slc16a14      | 1,25 | No  |
| ENSMUSG00000026222 | -8,09E-02 | 6,19770179   | 1,60E+00 | 2,06E-01 | 5,50E-01 | Sp100         | 0,95 | No  |
| ENSMUSG00000026223 | -2,56E-01 | 7,781562164  | 1,91E+01 | 1,25E-05 | 4,09E-04 | Itm2c         | 0,84 | Yes |
| ENSMUSG00000026224 | -3,94E-01 | 0,295612316  | 2,26E+00 | 1,33E-01 | 4,58E-01 | 4933407L21Rik | 0,76 | No  |
| ENSMUSG00000026226 | -2,81E-02 | -2,963245656 | 3,59E-04 | 9,85E-01 | 1,00E+00 | Spata3        | 0,98 | No  |
| ENSMUSG00000026227 | -6,01E-01 | -2,770562995 | 2,85E-01 | 5,94E-01 | 8,43E-01 | 2810459M11Rik | 0,66 | No  |
| ENSMUSG00000026228 | -5,39E-01 | -0,047107121 | 3,01E+00 | 8,29E-02 | 3,70E-01 | Htr2b         | 0,69 | No  |
| ENSMUSG00000026229 | -7,02E-05 | 6,755765328  | 1,30E-06 | 9,99E-01 | 1,00E+00 | Psm1          | 1,00 | No  |
| ENSMUSG00000026234 | 2,42E-02  | 8,212150805  | 1,75E-01 | 6,75E-01 | 8,91E-01 | Ncl           | 1,02 | No  |
| ENSMUSG00000026235 | 4,77E-02  | 1,281309522  | 6,02E-02 | 8,06E-01 | 9,64E-01 | Epha4         | 1,03 | No  |
| ENSMUSG00000026237 | -2,69E+00 | -2,963260181 | 2,87E+00 | 9,01E-02 | 3,80E-01 | Nmur1         | 0,16 | No  |
| ENSMUSG00000026238 | 1,78E-02  | 8,558637812  | 9,63E-02 | 7,56E-01 | 9,35E-01 | Ptma          | 1,01 | No  |
| ENSMUSG00000026239 | -1,41E-01 | 4,314631614  | 2,89E+00 | 8,92E-02 | 3,79E-01 | Pde6d         | 0,91 | No  |
| ENSMUSG00000026240 | -6,91E-03 | 4,204871865  | 6,61E-03 | 9,35E-01 | 1,00E+00 | Cops7b        | 1,00 | No  |
| ENSMUSG00000026241 | 1,96E-01  | -2,107632884 | 5,71E-02 | 8,11E-01 | 9,66E-01 | Nppc          | 1,15 | No  |
| ENSMUSG00000026245 | 8,11E-02  | 5,042062546  | 1,21E+00 | 2,72E-01 | 5,68E-01 | Farsb         | 1,06 | No  |

|                    |           |              |          |          |          |          |       |      |     |
|--------------------|-----------|--------------|----------|----------|----------|----------|-------|------|-----|
| ENSMUSG00000026247 | 1,81E+00  | -3,10765737  | 1,28E+00 | 2,58E-01 | 5,50E-01 | Ecel1    |       | 3,49 | No  |
| ENSMUSG00000026248 | -8,88E-02 | 4,456706121  | 1,20E+00 | 2,74E-01 | 5,70E-01 | Mrpl44   |       | 0,94 | No  |
| ENSMUSG00000026249 | -3,55E-01 | 0,633069011  | 2,64E+00 | 1,04E-01 | 3,96E-01 | Serpine2 |       | 0,78 | No  |
| ENSMUSG00000026253 | 1,81E+00  | -3,10765737  | 1,28E+00 | 2,58E-01 | 5,50E-01 | Chrng    |       | 3,49 | No  |
| ENSMUSG00000026254 | -6,66E-02 | 6,160395389  | 1,07E+00 | 3,01E-01 | 5,97E-01 | Eif4e2   |       | 0,95 | No  |
| ENSMUSG00000026255 | -7,38E-02 | -3,033659033 | 2,66E-03 | 9,59E-01 | 1,00E+00 | Efhd1    |       | 0,95 | No  |
| ENSMUSG00000026259 | -1,94E+00 | -3,107619243 | 1,50E+00 | 2,21E-01 | 5,50E-01 | Ngef     |       | 0,26 | No  |
| ENSMUSG00000026260 | -4,13E-02 | 5,924416259  | 3,91E-01 | 5,32E-01 | 8,06E-01 | Ndufa10  |       | 0,97 | No  |
| ENSMUSG00000026269 | 1,59E-01  | 6,859744673  | 6,72E+00 | 9,52E-03 | 8,99E-02 | Rnpepl1  |       | 1,12 | No  |
| ENSMUSG00000026270 | 2,31E-01  | 3,835172131  | 6,39E+00 | 1,15E-02 | 1,03E-01 | Capn10   |       | 1,17 | No  |
| ENSMUSG00000026271 | 5,19E-01  | 5,124784482  | 5,10E+01 | 9,09E-13 | 1,11E-10 | Gpr35    |       | 1,43 | Yes |
| ENSMUSG00000026273 | -2,47E-01 | 3,810676389  | 7,29E+00 | 6,94E-03 | 7,13E-02 | Mterf4   |       | 0,84 | No  |
| ENSMUSG00000026274 | 2,02E-01  | 3,632887131  | 4,44E+00 | 3,52E-02 | 2,22E-01 | Pask     |       | 1,15 | No  |
| ENSMUSG00000026275 | 1,97E-01  | 5,319158971  | 7,72E+00 | 5,46E-03 | 5,96E-02 | Ppp1r7   |       | 1,15 | No  |
| ENSMUSG00000026276 | -2,60E-03 | 7,142085625  | 1,87E-03 | 9,66E-01 | 1,00E+00 |          | 37500 | 1,00 | No  |
| ENSMUSG00000026277 | -4,50E-02 | 6,039349549  | 4,77E-01 | 4,90E-01 | 7,76E-01 | Stk25    |       | 0,97 | No  |
| ENSMUSG00000026278 | 1,68E-01  | -0,257375487 | 2,78E-01 | 5,98E-01 | 8,45E-01 | Bok      |       | 1,12 | No  |
| ENSMUSG00000026279 | -1,54E-01 | 4,357407567  | 3,57E+00 | 5,89E-02 | 3,00E-01 | Thap4    |       | 0,90 | No  |
| ENSMUSG00000026280 | -2,11E-02 | 5,159685348  | 8,56E-02 | 7,70E-01 | 9,42E-01 | Atg4b    |       | 0,99 | No  |
| ENSMUSG00000026281 | 6,60E-02  | 4,889138511  | 7,74E-01 | 3,79E-01 | 6,80E-01 | Dtymk    |       | 1,05 | No  |
| ENSMUSG00000026283 | 1,73E-01  | 4,571814627  | 4,72E+00 | 2,98E-02 | 1,98E-01 | Ing5     |       | 1,13 | No  |
| ENSMUSG00000026285 | -4,26E-02 | 0,036592227  | 2,59E-02 | 8,72E-01 | 1,00E+00 | Pdcd1    |       | 0,97 | No  |
| ENSMUSG00000026288 | 1,68E-01  | 7,894868965  | 8,22E+00 | 4,15E-03 | 4,86E-02 | Inpp5d   |       | 1,12 | Yes |
| ENSMUSG00000026289 | -3,32E-02 | 6,049895649  | 2,58E-01 | 6,11E-01 | 8,52E-01 | Atg16l1  |       | 0,98 | No  |
| ENSMUSG00000026295 | 1,87E+00  | -3,107639691 | 1,38E+00 | 2,40E-01 | 5,50E-01 | Spp2     |       | 3,67 | No  |
| ENSMUSG00000026301 | -3,19E+00 | -2,770626535 | 4,29E+00 | 3,84E-02 | 2,33E-01 | lqca     |       | 0,11 | No  |
| ENSMUSG00000026303 | -1,29E-01 | -0,088986607 | 1,63E-01 | 6,86E-01 | 8,97E-01 | Mlph     |       | 0,91 | No  |
| ENSMUSG00000026304 | 1,02E-01  | -1,929390042 | 2,05E-02 | 8,86E-01 | 1,00E+00 | Rab17    |       | 1,07 | No  |
| ENSMUSG00000026305 | 4,81E-02  | 7,75250945   | 6,71E-01 | 4,13E-01 | 7,08E-01 | Lrrfip1  |       | 1,03 | No  |
| ENSMUSG00000026307 | 7,10E-02  | 5,371577407  | 1,02E+00 | 3,13E-01 | 6,12E-01 | Scly     |       | 1,05 | No  |
| ENSMUSG00000026308 | 1,59E+00  | -2,711739009 | 1,74E+00 | 1,88E-01 | 5,50E-01 | Klhl30   |       | 3,02 | No  |
| ENSMUSG00000026309 | -1,01E-01 | 5,327153571  | 2,07E+00 | 1,50E-01 | 4,92E-01 | Ilkap    |       | 0,93 | No  |

|                    |           |              |          |          |          |               |      |     |
|--------------------|-----------|--------------|----------|----------|----------|---------------|------|-----|
| ENSMUSG00000026311 | 1,09E-01  | 4,319476813  | 1,72E+00 | 1,89E-01 | 5,50E-01 | Asb1          | 1,08 | No  |
| ENSMUSG00000026313 | 2,04E-01  | 5,455889904  | 8,47E+00 | 3,62E-03 | 4,40E-02 | Hdac4         | 1,15 | Yes |
| ENSMUSG00000026315 | -1,87E-01 | 4,764506513  | 5,79E+00 | 1,61E-02 | 1,32E-01 | Serpinb8      | 0,88 | No  |
| ENSMUSG00000026317 | 1,82E-01  | 6,136186949  | 7,90E+00 | 4,93E-03 | 5,54E-02 | Cln8          | 1,13 | No  |
| ENSMUSG00000026319 | 5,27E-02  | 6,011776408  | 6,47E-01 | 4,21E-01 | 7,16E-01 | 2310035C23Rik | 1,04 | No  |
| ENSMUSG00000026321 | -4,18E-01 | 6,072822629  | 4,16E+01 | 1,10E-10 | 1,04E-08 | Tnfrsf11a     | 0,75 | Yes |
| ENSMUSG00000026322 | -1,87E+00 | -3,107637761 | 1,39E+00 | 2,38E-01 | 5,50E-01 | Htr4          | 0,27 | No  |
| ENSMUSG00000026333 | -6,53E-02 | 2,854849688  | 3,13E-01 | 5,76E-01 | 8,34E-01 | Gin1          | 0,96 | No  |
| ENSMUSG00000026335 | -4,31E-02 | 3,369168226  | 1,80E-01 | 6,71E-01 | 8,89E-01 | Pam           | 0,97 | No  |
| ENSMUSG00000026339 | 6,47E-02  | 5,797888311  | 9,41E-01 | 3,32E-01 | 6,32E-01 | Ccdc93        | 1,05 | No  |
| ENSMUSG00000026341 | 5,61E-03  | 8,753070659  | 9,64E-03 | 9,22E-01 | 1,00E+00 | Actr3         | 1,00 | No  |
| ENSMUSG00000026342 | 2,04E-01  | 4,546342443  | 6,47E+00 | 1,10E-02 | 9,98E-02 | Slc35f5       | 1,15 | No  |
| ENSMUSG00000026343 | -2,77E+00 | -2,548117539 | 7,25E+00 | 7,09E-03 | 7,25E-02 | Gpr39         | 0,15 | No  |
| ENSMUSG00000026344 | -2,95E+00 | -2,963237934 | 3,55E+00 | 5,97E-02 | 3,02E-01 | Lypd1         | 0,13 | No  |
| ENSMUSG00000026347 | 4,49E-01  | -0,029071183 | 2,16E+00 | 1,42E-01 | 4,76E-01 | Tmem163       | 1,36 | No  |
| ENSMUSG00000026348 | 9,95E-01  | -3,033653241 | 4,20E-01 | 5,17E-01 | 7,98E-01 | Acmsd         | 1,99 | No  |
| ENSMUSG00000026349 | 7,58E-02  | 6,159166302  | 1,40E+00 | 2,38E-01 | 5,50E-01 | Ccnt2         | 1,05 | No  |
| ENSMUSG00000026353 | 5,50E-02  | 6,586636534  | 7,76E-01 | 3,78E-01 | 6,79E-01 | Ubxn4         | 1,04 | No  |
| ENSMUSG00000026354 | -7,28E-01 | -1,574151831 | 1,69E+00 | 1,93E-01 | 5,50E-01 | Lct           | 0,60 | No  |
| ENSMUSG00000026355 | 7,89E-02  | 6,796600162  | 1,65E+00 | 1,99E-01 | 5,50E-01 | Mcm6          | 1,06 | No  |
| ENSMUSG00000026356 | 1,59E-01  | 5,105428075  | 4,76E+00 | 2,91E-02 | 1,94E-01 | Dars          | 1,12 | No  |
| ENSMUSG00000026357 | 2,81E-01  | 3,577823672  | 8,25E+00 | 4,08E-03 | 4,81E-02 | Rgs18         | 1,21 | Yes |
| ENSMUSG00000026358 | 3,36E-01  | 8,281845636  | 3,32E+01 | 8,53E-09 | 6,00E-07 | Rgs1          | 1,26 | Yes |
| ENSMUSG00000026360 | 4,22E-01  | 6,842901645  | 4,71E+01 | 6,82E-12 | 7,41E-10 | Rgs2          | 1,34 | Yes |
| ENSMUSG00000026361 | -8,70E-03 | 5,428894158  | 1,55E-02 | 9,01E-01 | 1,00E+00 | Cdc73         | 0,99 | No  |
| ENSMUSG00000026365 | -7,17E-01 | 0,587044671  | 8,67E+00 | 3,24E-03 | 4,06E-02 | Cfh           | 0,61 | Yes |
| ENSMUSG00000026374 | -1,78E-02 | 6,55133218   | 8,16E-02 | 7,75E-01 | 9,45E-01 | Tsn           | 0,99 | No  |
| ENSMUSG00000026377 | 1,06E-01  | 4,962295879  | 2,03E+00 | 1,54E-01 | 4,98E-01 | Nifk          | 1,08 | No  |
| ENSMUSG00000026380 | -5,37E-01 | -2,31114923  | 4,28E-01 | 5,13E-01 | 7,95E-01 | Tfcp211       | 0,69 | No  |
| ENSMUSG00000026383 | -8,05E-02 | -0,641401623 | 4,23E-02 | 8,37E-01 | 9,81E-01 | Epb41l5       | 0,95 | No  |
| ENSMUSG00000026384 | 1,25E-01  | 6,144447884  | 3,74E+00 | 5,33E-02 | 2,82E-01 | Ptpn4         | 1,09 | No  |
| ENSMUSG00000026385 | 1,30E-01  | 6,257501702  | 4,09E+00 | 4,33E-02 | 2,47E-01 | Dbi           | 1,09 | No  |

|                    |           |              |          |          |          |               |      |     |
|--------------------|-----------|--------------|----------|----------|----------|---------------|------|-----|
| ENSMUSG00000026387 | 1,04E-01  | -1,929313121 | 2,37E-02 | 8,78E-01 | 1,00E+00 | Sctr          | 1,07 | No  |
| ENSMUSG00000026388 | 2,11E-04  | -0,419192901 | 3,05E-07 | 1,00E+00 | 1,00E+00 | 3110009E18Rik | 1,00 | No  |
| ENSMUSG00000026389 | 3,79E-01  | 5,299465297  | 2,81E+01 | 1,15E-07 | 6,34E-06 | Steap3        | 1,30 | Yes |
| ENSMUSG00000026390 | -4,84E-01 | 2,078124052  | 9,75E+00 | 1,79E-03 | 2,56E-02 | Marco         | 0,72 | Yes |
| ENSMUSG00000026393 | 1,49E-01  | 7,290164777  | 6,15E+00 | 1,32E-02 | 1,14E-01 | Nek7          | 1,11 | No  |
| ENSMUSG00000026395 | 7,98E-02  | 9,190727837  | 1,98E+00 | 1,60E-01 | 5,07E-01 | Ptprc         | 1,06 | No  |
| ENSMUSG00000026398 | -1,89E+00 | -3,1076441   | 1,42E+00 | 2,33E-01 | 5,50E-01 | Nr5a2         | 0,27 | No  |
| ENSMUSG00000026399 | -6,31E-01 | -1,073257116 | 1,97E+00 | 1,60E-01 | 5,09E-01 | Cd55          | 0,65 | No  |
| ENSMUSG00000026401 | 1,85E+00  | -3,010054956 | 1,34E+00 | 2,47E-01 | 5,50E-01 | Cd55b         | 3,60 | No  |
| ENSMUSG00000026404 | -4,33E-02 | 2,613428198  | 1,19E-01 | 7,30E-01 | 9,21E-01 | Ddx59         | 0,97 | No  |
| ENSMUSG00000026407 | -1,06E+00 | -2,247062922 | 1,80E+00 | 1,80E-01 | 5,41E-01 | Cacna1s       | 0,48 | No  |
| ENSMUSG00000026409 | 2,08E-01  | 3,588380662  | 4,61E+00 | 3,19E-02 | 2,07E-01 | Pfkfb2        | 1,16 | No  |
| ENSMUSG00000026411 | 8,34E-02  | 2,346227479  | 3,69E-01 | 5,44E-01 | 8,12E-01 | Tmem9         | 1,06 | No  |
| ENSMUSG00000026413 | -2,45E+00 | -2,35548519  | 8,41E+00 | 3,72E-03 | 4,48E-02 | Pkp1          | 0,18 | Yes |
| ENSMUSG00000026414 | -5,73E-01 | -0,980569661 | 1,82E+00 | 1,78E-01 | 5,38E-01 | Tnnt2         | 0,67 | No  |
| ENSMUSG00000026415 | 7,15E-01  | -2,896163419 | 2,78E-01 | 5,98E-01 | 8,45E-01 | Fcamr         | 1,64 | No  |
| ENSMUSG00000026418 | 4,88E-01  | -2,401434966 | 3,24E-01 | 5,69E-01 | 8,30E-01 | Tnni1         | 1,40 | No  |
| ENSMUSG00000026421 | -7,34E-02 | 7,539025028  | 1,54E+00 | 2,14E-01 | 5,50E-01 | Csrp1         | 0,95 | No  |
| ENSMUSG00000026425 | 5,58E-02  | 6,899230332  | 8,36E-01 | 3,60E-01 | 6,62E-01 | Srgap2        | 1,04 | No  |
| ENSMUSG00000026426 | 6,19E-02  | 6,535566347  | 9,77E-01 | 3,23E-01 | 6,23E-01 | Arl8a         | 1,04 | No  |
| ENSMUSG00000026427 | 4,02E-02  | 5,301648143  | 3,20E-01 | 5,72E-01 | 8,32E-01 | Eif2d         | 1,03 | No  |
| ENSMUSG00000026429 | 2,22E-01  | 3,06585064   | 4,02E+00 | 4,50E-02 | 2,53E-01 | Ube2t         | 1,17 | No  |
| ENSMUSG00000026430 | 1,54E-01  | 7,06658995   | 6,48E+00 | 1,09E-02 | 9,96E-02 | Rassf5        | 1,11 | No  |
| ENSMUSG00000026432 | 2,67E+00  | -3,033636951 | 2,76E+00 | 9,68E-02 | 3,88E-01 | Avpr1b        | 6,36 | No  |
| ENSMUSG00000026433 | -1,29E-02 | 4,69049164   | 2,77E-02 | 8,68E-01 | 1,00E+00 | Rab29         | 0,99 | No  |
| ENSMUSG00000026434 | 7,37E-02  | 6,944174371  | 1,46E+00 | 2,27E-01 | 5,50E-01 | Nucks1        | 1,05 | No  |
| ENSMUSG00000026435 | -4,39E-01 | 0,65581546   | 3,60E+00 | 5,78E-02 | 2,97E-01 | Slc45a3       | 0,74 | No  |
| ENSMUSG00000026436 | 9,60E-02  | 5,469560877  | 1,90E+00 | 1,68E-01 | 5,23E-01 | Elk4          | 1,07 | No  |
| ENSMUSG00000026437 | 2,12E-01  | 5,939632348  | 1,03E+01 | 1,31E-03 | 2,01E-02 | Cdk18         | 1,16 | Yes |
| ENSMUSG00000026439 | 1,59E-01  | 5,189564835  | 4,96E+00 | 2,59E-02 | 1,80E-01 | Rbbp5         | 1,12 | No  |
| ENSMUSG00000026442 | -1,94E+00 | -3,107619243 | 1,50E+00 | 2,21E-01 | 5,50E-01 | Nfasc         | 0,26 | No  |
| ENSMUSG00000026443 | -8,99E-02 | -2,448698162 | 7,23E-03 | 9,32E-01 | 1,00E+00 | Lrrn2         | 0,94 | No  |

|                    |           |              |          |          |          |          |      |     |
|--------------------|-----------|--------------|----------|----------|----------|----------|------|-----|
| ENSMUSG00000026447 | -9,96E-04 | 0,111917553  | 1,19E-05 | 9,97E-01 | 1,00E+00 | Pik3c2b  | 1,00 | No  |
| ENSMUSG00000026450 | -3,59E+00 | -2,770598504 | 5,79E+00 | 1,61E-02 | 1,32E-01 | Chit1    | 0,08 | No  |
| ENSMUSG00000026452 | 9,91E-01  | -1,832026685 | 2,24E+00 | 1,34E-01 | 4,61E-01 | Syt2     | 1,99 | No  |
| ENSMUSG00000026455 | -2,53E-01 | 1,861579106  | 2,66E+00 | 1,03E-01 | 3,95E-01 | Klhl12   | 0,84 | No  |
| ENSMUSG00000026456 | 2,06E-01  | 5,412653473  | 8,71E+00 | 3,16E-03 | 3,98E-02 | Cyb5r1   | 1,15 | Yes |
| ENSMUSG00000026457 | -2,96E-02 | 7,424707747  | 2,48E-01 | 6,19E-01 | 8,56E-01 | Adipor1  | 0,98 | No  |
| ENSMUSG00000026458 | 3,29E-01  | 5,220291616  | 2,09E+01 | 4,74E-06 | 1,72E-04 | Ppfia4   | 1,26 | Yes |
| ENSMUSG00000026463 | -5,04E-02 | 3,146848755  | 2,20E-01 | 6,39E-01 | 8,69E-01 | Atp2b4   | 0,97 | No  |
| ENSMUSG00000026466 | 4,93E-02  | 7,098847031  | 6,67E-01 | 4,14E-01 | 7,09E-01 | Tor1aip1 | 1,03 | No  |
| ENSMUSG00000026469 | 1,87E-01  | 7,094971201  | 9,52E+00 | 2,03E-03 | 2,83E-02 | Xpr1     | 1,14 | Yes |
| ENSMUSG00000026470 | 3,60E-02  | 6,751086661  | 3,41E-01 | 5,59E-01 | 8,22E-01 | Stx6     | 1,03 | No  |
| ENSMUSG00000026471 | 2,96E-01  | 5,079309828  | 1,61E+01 | 5,94E-05 | 1,57E-03 | Mr1      | 1,23 | Yes |
| ENSMUSG00000026473 | -1,99E-01 | 6,372528254  | 9,92E+00 | 1,64E-03 | 2,39E-02 | Glul     | 0,87 | Yes |
| ENSMUSG00000026475 | -4,69E-01 | 0,233689088  | 2,95E+00 | 8,61E-02 | 3,78E-01 | Rgs16    | 0,72 | No  |
| ENSMUSG00000026478 | 2,47E-01  | 5,487561203  | 1,26E+01 | 3,77E-04 | 7,28E-03 | Lamc1    | 1,19 | Yes |
| ENSMUSG00000026479 | -4,42E-02 | -2,22626851  | 3,15E-03 | 9,55E-01 | 1,00E+00 | Lamc2    | 0,97 | No  |
| ENSMUSG00000026480 | 1,11E-01  | 7,690398954  | 3,55E+00 | 5,94E-02 | 3,02E-01 | Ncf2     | 1,08 | No  |
| ENSMUSG00000026482 | -1,14E-01 | 6,099752915  | 3,04E+00 | 8,14E-02 | 3,66E-01 | Rgl1     | 0,92 | No  |
| ENSMUSG00000026483 | -1,66E-01 | 7,832519705  | 8,10E+00 | 4,42E-03 | 5,09E-02 | Fam129a  | 0,89 | No  |
| ENSMUSG00000026484 | -7,05E-02 | 4,695170908  | 8,25E-01 | 3,64E-01 | 6,65E-01 | Rnf2     | 0,95 | No  |
| ENSMUSG00000026489 | -2,61E-01 | 2,8553448    | 5,18E+00 | 2,29E-02 | 1,65E-01 | Coq8a    | 0,83 | No  |
| ENSMUSG00000026490 | -7,70E-02 | 3,996483186  | 7,54E-01 | 3,85E-01 | 6,86E-01 | Cdc42bpa | 0,95 | No  |
| ENSMUSG00000026491 | 6,10E-02  | 6,512365389  | 9,50E-01 | 3,30E-01 | 6,30E-01 | Ahctf1   | 1,04 | No  |
| ENSMUSG00000026492 | 9,17E-02  | 3,871561645  | 1,01E+00 | 3,15E-01 | 6,16E-01 | Tfb2m    | 1,07 | No  |
| ENSMUSG00000026494 | -1,06E+00 | -0,541792132 | 7,83E+00 | 5,13E-03 | 5,69E-02 | Kif26b   | 0,48 | No  |
| ENSMUSG00000026495 | -2,54E-01 | 0,309816863  | 9,91E-01 | 3,19E-01 | 6,20E-01 | Efcab2   | 0,84 | No  |
| ENSMUSG00000026496 | 1,31E-01  | 6,429514337  | 4,33E+00 | 3,75E-02 | 2,30E-01 | Parp1    | 1,10 | No  |
| ENSMUSG00000026497 | -2,71E+00 | -2,89615606  | 2,90E+00 | 8,84E-02 | 3,79E-01 | Mixl1    | 0,15 | No  |
| ENSMUSG00000026499 | 4,87E-02  | 6,35783831   | 5,90E-01 | 4,42E-01 | 7,34E-01 | Acbd3    | 1,03 | No  |
| ENSMUSG00000026500 | -1,34E-01 | 2,997034316  | 1,42E+00 | 2,34E-01 | 5,50E-01 | Cox20    | 0,91 | No  |
| ENSMUSG00000026502 | 1,02E-01  | 5,899600557  | 2,37E+00 | 1,24E-01 | 4,40E-01 | Desi2    | 1,07 | No  |
| ENSMUSG00000026504 | -2,64E-02 | 4,712658222  | 1,17E-01 | 7,33E-01 | 9,23E-01 | Sdccag8  | 0,98 | No  |

|                    |           |              |          |          |          |          |      |     |
|--------------------|-----------|--------------|----------|----------|----------|----------|------|-----|
| ENSMUSG00000026509 | 1,42E-01  | 7,329847036  | 5,63E+00 | 1,77E-02 | 1,39E-01 | Capn2    | 1,10 | No  |
| ENSMUSG00000026510 | -1,26E-01 | 5,505856482  | 3,34E+00 | 6,78E-02 | 3,28E-01 | Trp53bp2 | 0,92 | No  |
| ENSMUSG00000026511 | -2,89E-03 | 6,110156728  | 1,98E-03 | 9,65E-01 | 1,00E+00 | Srp9     | 1,00 | No  |
| ENSMUSG00000026516 | 4,49E-02  | 5,491653727  | 4,25E-01 | 5,15E-01 | 7,96E-01 | Nvl      | 1,03 | No  |
| ENSMUSG00000026519 | 1,96E-01  | 5,248460841  | 7,53E+00 | 6,07E-03 | 6,47E-02 | Tmem63a  | 1,15 | No  |
| ENSMUSG00000026520 | 1,51E-01  | 5,080384821  | 4,23E+00 | 3,96E-02 | 2,36E-01 | Pycr2    | 1,11 | No  |
| ENSMUSG00000026525 | 4,44E-02  | 4,061828627  | 2,55E-01 | 6,14E-01 | 8,53E-01 | Opn3     | 1,03 | No  |
| ENSMUSG00000026526 | 1,60E-02  | 6,416710891  | 6,45E-02 | 8,00E-01 | 9,60E-01 | Fh1      | 1,01 | No  |
| ENSMUSG00000026532 | -2,48E+00 | -2,497588707 | 5,32E+00 | 2,11E-02 | 1,56E-01 | Spta1    | 0,18 | No  |
| ENSMUSG00000026536 | -6,94E-02 | 3,733702256  | 5,54E-01 | 4,57E-01 | 7,46E-01 | Ifi211   | 0,95 | No  |
| ENSMUSG00000026544 | 1,59E-01  | 3,306636933  | 2,27E+00 | 1,31E-01 | 4,56E-01 | Dusp23   | 1,12 | No  |
| ENSMUSG00000026546 | -1,04E-01 | 1,91019362   | 4,78E-01 | 4,90E-01 | 7,76E-01 | Cfap45   | 0,93 | No  |
| ENSMUSG00000026547 | -5,92E-02 | 9,69869464   | 1,10E+00 | 2,93E-01 | 5,89E-01 | Tagln2   | 0,96 | No  |
| ENSMUSG00000026548 | 3,17E-01  | 5,671398361  | 2,17E+01 | 3,20E-06 | 1,23E-04 | Slamf9   | 1,25 | Yes |
| ENSMUSG00000026553 | -6,19E-04 | 8,324682177  | 1,15E-04 | 9,91E-01 | 1,00E+00 | Copa     | 1,00 | No  |
| ENSMUSG00000026554 | -4,14E-02 | 6,687812183  | 4,48E-01 | 5,03E-01 | 7,88E-01 | Dcaf8    | 0,97 | No  |
| ENSMUSG00000026556 | -2,41E-01 | -0,436700547 | 4,59E-01 | 4,98E-01 | 7,83E-01 | Vangl2   | 0,85 | No  |
| ENSMUSG00000026558 | 4,24E-02  | 8,057792795  | 5,28E-01 | 4,67E-01 | 7,56E-01 | Uck2     | 1,03 | No  |
| ENSMUSG00000026563 | -2,72E-02 | 4,619364247  | 1,22E-01 | 7,27E-01 | 9,19E-01 | Tada1    | 0,98 | No  |
| ENSMUSG00000026564 | 3,17E-01  | -2,44866192  | 1,02E-01 | 7,49E-01 | 9,31E-01 | Dusp27   | 1,25 | No  |
| ENSMUSG00000026565 | -7,54E-02 | 5,09425276   | 1,07E+00 | 3,01E-01 | 5,97E-01 | Pou2f1   | 0,95 | No  |
| ENSMUSG00000026566 | 1,55E-01  | 3,288095901  | 2,20E+00 | 1,38E-01 | 4,68E-01 | Mpzl1    | 1,11 | No  |
| ENSMUSG00000026567 | -9,70E-01 | -2,548199559 | 8,23E-01 | 3,64E-01 | 6,65E-01 | Adcy10   | 0,51 | No  |
| ENSMUSG00000026568 | -1,87E-02 | 4,789675414  | 5,93E-02 | 8,08E-01 | 9,64E-01 | Mpc2     | 0,99 | No  |
| ENSMUSG00000026571 | -1,15E-01 | 4,678110863  | 2,17E+00 | 1,40E-01 | 4,73E-01 | Dcaf6    | 0,92 | No  |
| ENSMUSG00000026574 | 1,87E+00  | -3,107639691 | 1,38E+00 | 2,40E-01 | 5,50E-01 | Dpt      | 3,67 | No  |
| ENSMUSG00000026575 | 1,81E-02  | 2,560363192  | 1,97E-02 | 8,88E-01 | 1,00E+00 | Nme7     | 1,01 | No  |
| ENSMUSG00000026576 | -3,85E-01 | 1,066793165  | 3,84E+00 | 5,00E-02 | 2,71E-01 | Atp1b1   | 0,77 | No  |
| ENSMUSG00000026577 | 1,26E-01  | 4,350826836  | 2,32E+00 | 1,28E-01 | 4,49E-01 | Blzf1    | 1,09 | No  |
| ENSMUSG00000026578 | -3,19E-02 | 2,931989157  | 7,81E-02 | 7,80E-01 | 9,48E-01 | Ccdc181  | 0,98 | No  |
| ENSMUSG00000026579 | -3,83E-01 | 3,050442533  | 1,16E+01 | 6,52E-04 | 1,14E-02 | F5       | 0,77 | Yes |
| ENSMUSG00000026580 | 1,94E-01  | -0,333423246 | 3,46E-01 | 5,56E-01 | 8,21E-01 | Selp     | 1,14 | No  |

|                    |           |              |           |          |          |          |      |     |
|--------------------|-----------|--------------|-----------|----------|----------|----------|------|-----|
| ENSMUSG00000026581 | -2,34E-01 | 2,800751453  | 3,89E+00  | 4,85E-02 | 2,65E-01 | Sell     | 0,85 | No  |
| ENSMUSG00000026582 | -1,37E+00 | -2,89609265  | 1,18E+00  | 2,78E-01 | 5,74E-01 | Sele     | 0,39 | No  |
| ENSMUSG00000026584 | 7,64E-02  | 5,383849404  | 1,20E+00  | 2,74E-01 | 5,70E-01 | Scyl3    | 1,05 | No  |
| ENSMUSG00000026585 | 5,82E-02  | 4,159658083  | 4,60E-01  | 4,98E-01 | 7,83E-01 | Kifap3   | 1,04 | No  |
| ENSMUSG00000026586 | -1,20E+00 | -2,355469149 | 1,86E+00  | 1,73E-01 | 5,30E-01 | Prrx1    | 0,44 | No  |
| ENSMUSG00000026587 | 2,64E+00  | -3,033673223 | 2,69E+00  | 1,01E-01 | 3,92E-01 | Astn1    | 6,23 | No  |
| ENSMUSG00000026589 | -1,19E-01 | 0,281084824  | 2,08E-01  | 6,48E-01 | 8,75E-01 | Sec16b   | 0,92 | No  |
| ENSMUSG00000026592 | -2,02E+00 | -2,548143853 | 3,11E+00  | 7,80E-02 | 3,57E-01 | Tex35    | 0,25 | No  |
| ENSMUSG00000026594 | -4,97E-02 | 0,621857025  | 4,44E-02  | 8,33E-01 | 9,78E-01 | Ralgps2  | 0,97 | No  |
| ENSMUSG00000026596 | 8,47E-02  | 5,940969016  | 1,65E+00  | 1,99E-01 | 5,50E-01 | Abl2     | 1,06 | No  |
| ENSMUSG00000026600 | 1,85E-01  | 8,592951484  | 1,04E+01  | 1,26E-03 | 1,95E-02 | Soat1    | 1,14 | Yes |
| ENSMUSG00000026601 | -1,00E-01 | -0,648371138 | 6,82E-02  | 7,94E-01 | 9,56E-01 | Axdnd1   | 0,93 | No  |
| ENSMUSG00000026602 | 2,66E+00  | -2,896131654 | 2,73E+00  | 9,86E-02 | 3,91E-01 | Nphs2    | 6,32 | No  |
| ENSMUSG00000026603 | 4,39E-02  | 4,567847328  | 3,06E-01  | 5,80E-01 | 8,37E-01 | Smyd2    | 1,03 | No  |
| ENSMUSG00000026604 | -6,97E-01 | 0,295723044  | 6,90E+00  | 8,62E-03 | 8,37E-02 | Ptpn14   | 0,62 | No  |
| ENSMUSG00000026605 | 3,47E-01  | 5,757827123  | 2,66E+01  | 2,46E-07 | 1,27E-05 | Cenpf    | 1,27 | Yes |
| ENSMUSG00000026608 | 2,48E-01  | 4,105615966  | 8,12E+00  | 4,37E-03 | 5,05E-02 | Kctd3    | 1,19 | No  |
| ENSMUSG00000026609 | -1,14E-02 | -3,033635021 | 1,50E-05  | 9,97E-01 | 1,00E+00 | Ush2a    | 0,99 | No  |
| ENSMUSG00000026610 | -3,83E-02 | -3,107651936 | -7,91E-11 | 1,00E+00 | 1,00E+00 | Esrrg    | 0,97 | No  |
| ENSMUSG00000026611 | -9,02E-02 | -2,83204665  | 5,62E-03  | 9,40E-01 | 1,00E+00 | Spata17  | 0,94 | No  |
| ENSMUSG00000026614 | -1,89E+00 | -3,1076441   | 1,42E+00  | 2,33E-01 | 5,50E-01 | Slc30a10 | 0,27 | No  |
| ENSMUSG00000026615 | 4,48E-02  | 6,912666372  | 5,40E-01  | 4,63E-01 | 7,51E-01 | Eprs     | 1,03 | No  |
| ENSMUSG00000026616 | 1,55E+00  | -2,355611994 | 3,61E+00  | 5,75E-02 | 2,95E-01 | Cr2      | 2,93 | No  |
| ENSMUSG00000026617 | 9,96E-02  | 4,311152883  | 1,43E+00  | 2,31E-01 | 5,50E-01 | Bpnt1    | 1,07 | No  |
| ENSMUSG00000026618 | 1,14E-01  | 6,136368553  | 3,14E+00  | 7,65E-02 | 3,53E-01 | Iars2    | 1,08 | No  |
| ENSMUSG00000026620 | -2,71E+00 | -2,896132076 | 2,92E+00  | 8,76E-02 | 3,78E-01 | Mark1    | 0,15 | No  |
| ENSMUSG00000026621 | 1,68E+00  | -2,185662076 | 4,41E+00  | 3,58E-02 | 2,24E-01 | Marc1    | 3,20 | No  |
| ENSMUSG00000026622 | 2,51E-01  | 4,796782232  | 1,08E+01  | 1,04E-03 | 1,66E-02 | Nek2     | 1,19 | Yes |
| ENSMUSG00000026623 | 1,15E-01  | 6,812112737  | 3,53E+00  | 6,02E-02 | 3,04E-01 | Lpgat1   | 1,08 | No  |
| ENSMUSG00000026626 | 4,84E-02  | 6,505522797  | 5,96E-01  | 4,40E-01 | 7,32E-01 | Ppp2r5a  | 1,03 | No  |
| ENSMUSG00000026627 | 2,40E-01  | 5,136174897  | 1,09E+01  | 9,76E-04 | 1,59E-02 | Tmem206  | 1,18 | Yes |
| ENSMUSG00000026628 | 2,33E-03  | 7,888721677  | 1,58E-03  | 9,68E-01 | 1,00E+00 | Atf3     | 1,00 | No  |

|                    |           |              |          |          |          |         |      |     |
|--------------------|-----------|--------------|----------|----------|----------|---------|------|-----|
| ENSMUSG00000026630 | -4,92E-01 | 5,203263094  | 4,76E+01 | 5,32E-12 | 6,00E-10 | Batf3   | 0,71 | Yes |
| ENSMUSG00000026632 | -7,25E-02 | 2,970117896  | 4,15E-01 | 5,20E-01 | 7,99E-01 | Tatdn3  | 0,95 | No  |
| ENSMUSG00000026634 | 7,31E-03  | 5,742443737  | 1,18E-02 | 9,13E-01 | 1,00E+00 | Angel2  | 1,01 | No  |
| ENSMUSG00000026637 | 2,00E-01  | 5,344731883  | 8,13E+00 | 4,37E-03 | 5,05E-02 | Traf5   | 1,15 | No  |
| ENSMUSG00000026638 | -5,29E-01 | -0,210885122 | 3,14E+00 | 7,64E-02 | 3,52E-01 | Irf6    | 0,69 | No  |
| ENSMUSG00000026639 | 8,48E-02  | 2,287262354  | 3,73E-01 | 5,41E-01 | 8,11E-01 | Lamb3   | 1,06 | No  |
| ENSMUSG00000026640 | 2,69E-01  | 1,750146     | 2,75E+00 | 9,74E-02 | 3,89E-01 | Plxna2  | 1,20 | No  |
| ENSMUSG00000026641 | 1,20E-02  | 5,447286678  | 3,04E-02 | 8,62E-01 | 9,96E-01 | Usf1    | 1,01 | No  |
| ENSMUSG00000026643 | 9,96E-02  | 5,67597564   | 2,15E+00 | 1,42E-01 | 4,77E-01 | Nmt2    | 1,07 | No  |
| ENSMUSG00000026644 | 1,81E+00  | -3,10765737  | 1,28E+00 | 2,58E-01 | 5,50E-01 | Acdb7   | 3,49 | No  |
| ENSMUSG00000026646 | -2,01E-01 | 3,000128737  | 3,30E+00 | 6,94E-02 | 3,32E-01 | Suv39h2 | 0,87 | No  |
| ENSMUSG00000026648 | -3,80E-01 | 5,51179516   | 3,09E+01 | 2,69E-08 | 1,70E-06 | Dclre1c | 0,77 | Yes |
| ENSMUSG00000026649 | 5,77E-01  | 0,655827803  | 6,18E+00 | 1,29E-02 | 1,13E-01 | Cfap126 | 1,49 | No  |
| ENSMUSG00000026650 | -7,64E-01 | -2,497597187 | 6,54E-01 | 4,19E-01 | 7,14E-01 | Meig1   | 0,59 | No  |
| ENSMUSG00000026655 | -1,36E-01 | 6,126959153  | 4,45E+00 | 3,49E-02 | 2,21E-01 | Fam107b | 0,91 | No  |
| ENSMUSG00000026656 | 2,99E-01  | 9,273501738  | 2,77E+01 | 1,38E-07 | 7,41E-06 | Fcgr2b  | 1,23 | Yes |
| ENSMUSG00000026657 | 5,26E-02  | 6,151459248  | 6,69E-01 | 4,13E-01 | 7,09E-01 | Frmd4a  | 1,04 | No  |
| ENSMUSG00000026659 | 2,76E-02  | 2,870089106  | 5,67E-02 | 8,12E-01 | 9,67E-01 | Dusp12  | 1,02 | No  |
| ENSMUSG00000026662 | -9,01E-02 | 5,638768894  | 1,78E+00 | 1,83E-01 | 5,45E-01 | Sephs1  | 0,94 | No  |
| ENSMUSG00000026663 | 1,43E-01  | 6,340821625  | 5,07E+00 | 2,43E-02 | 1,72E-01 | Atf6    | 1,10 | No  |
| ENSMUSG00000026664 | -3,48E-01 | 4,382666631  | 1,84E+01 | 1,78E-05 | 5,57E-04 | Phyh    | 0,79 | Yes |
| ENSMUSG00000026667 | -5,96E-02 | 8,324721872  | 1,07E+00 | 3,01E-01 | 5,97E-01 | Uhmk1   | 0,96 | No  |
| ENSMUSG00000026668 | 1,11E+00  | -2,600732664 | 1,17E+00 | 2,79E-01 | 5,76E-01 | Ucma    | 2,16 | No  |
| ENSMUSG00000026669 | 3,29E-01  | 4,849438693  | 1,88E+01 | 1,48E-05 | 4,74E-04 | Mcm10   | 1,26 | Yes |
| ENSMUSG00000026670 | -2,93E-01 | 5,866010135  | 1,94E+01 | 1,05E-05 | 3,52E-04 | Uap1    | 0,82 | Yes |
| ENSMUSG00000026672 | -9,02E-02 | 3,469771135  | 8,19E-01 | 3,65E-01 | 6,66E-01 | Optn    | 0,94 | No  |
| ENSMUSG00000026674 | -9,81E-01 | -2,145955068 | 1,49E+00 | 2,23E-01 | 5,50E-01 | Ddr2    | 0,51 | No  |
| ENSMUSG00000026675 | 2,72E-01  | 4,663563035  | 1,21E+01 | 5,18E-04 | 9,45E-03 | Hsd17b7 | 1,21 | Yes |
| ENSMUSG00000026678 | -3,18E+00 | -2,896135562 | 4,24E+00 | 3,94E-02 | 2,35E-01 | Rgs5    | 0,11 | No  |
| ENSMUSG00000026679 | 2,98E-02  | -1,355507437 | 3,43E-03 | 9,53E-01 | 1,00E+00 | Enkur   | 1,02 | No  |
| ENSMUSG00000026683 | 2,25E-01  | 4,487412285  | 7,81E+00 | 5,19E-03 | 5,75E-02 | Nuf2    | 1,17 | No  |
| ENSMUSG00000026687 | -4,98E-02 | 7,580602318  | 7,11E-01 | 3,99E-01 | 6,98E-01 | Aldh9a1 | 0,97 | No  |



|                    |           |              |           |          |          |               |      |     |
|--------------------|-----------|--------------|-----------|----------|----------|---------------|------|-----|
| ENSMUSG00000026688 | 3,06E-01  | 3,19540343   | 7,87E+00  | 5,04E-03 | 5,62E-02 | Mgst3         | 1,24 | No  |
| ENSMUSG00000026691 | -3,83E-02 | -3,107651936 | -7,91E-11 | 1,00E+00 | 1,00E+00 | Fmo3          | 0,97 | No  |
| ENSMUSG00000026692 | 9,01E-03  | -3,107646452 | -5,16E-10 | 1,00E+00 | 1,00E+00 | Fmo4          | 1,01 | No  |
| ENSMUSG00000026694 | 3,04E-01  | 4,415727039  | 1,37E+01  | 2,09E-04 | 4,51E-03 | Mettl13       | 1,23 | Yes |
| ENSMUSG00000026696 | 7,27E-02  | 5,743864591  | 1,17E+00  | 2,80E-01 | 5,77E-01 | Vamp4         | 1,05 | No  |
| ENSMUSG00000026697 | 1,81E+00  | -3,10765737  | 1,28E+00  | 2,58E-01 | 5,50E-01 | Myoc          | 3,49 | No  |
| ENSMUSG00000026698 | 4,86E-02  | 4,307487265  | 3,43E-01  | 5,58E-01 | 8,22E-01 | Pigc          | 1,03 | No  |
| ENSMUSG00000026700 | -5,00E-01 | 4,946374916  | 4,62E+01  | 1,06E-11 | 1,12E-09 | Tnfsf4        | 0,71 | Yes |
| ENSMUSG00000026701 | 7,60E-02  | 7,406878543  | 1,63E+00  | 2,02E-01 | 5,50E-01 | Prdx6         | 1,05 | No  |
| ENSMUSG00000026705 | 1,67E-01  | 5,098862041  | 5,30E+00  | 2,13E-02 | 1,57E-01 | Klhl20        | 1,12 | No  |
| ENSMUSG00000026707 | 1,43E-01  | 2,747297686  | 1,42E+00  | 2,33E-01 | 5,50E-01 | Nsun6         | 1,10 | No  |
| ENSMUSG00000026708 | 1,39E-01  | 4,265625459  | 2,74E+00  | 9,79E-02 | 3,90E-01 | Cenpl         | 1,10 | No  |
| ENSMUSG00000026709 | 1,42E-01  | 3,847952658  | 2,41E+00  | 1,21E-01 | 4,34E-01 | Dars2         | 1,10 | No  |
| ENSMUSG00000026712 | 3,89E-01  | 9,296114942  | 4,67E+01  | 8,08E-12 | 8,65E-10 | Mrc1          | 1,31 | Yes |
| ENSMUSG00000026715 | -1,27E-01 | 1,414152333  | 4,99E-01  | 4,80E-01 | 7,67E-01 | Serpinc1      | 0,92 | No  |
| ENSMUSG00000026718 | -3,41E-02 | 4,60377058   | 1,86E-01  | 6,66E-01 | 8,85E-01 | Stam          | 0,98 | No  |
| ENSMUSG00000026721 | -7,01E-01 | 6,864962036  | 1,31E+02  | 2,17E-30 | 1,28E-27 | Rabgap1l      | 0,62 | Yes |
| ENSMUSG00000026723 | 8,29E-02  | 2,819143795  | 4,97E-01  | 4,81E-01 | 7,69E-01 | Trdmt1        | 1,06 | No  |
| ENSMUSG00000026725 | -2,65E+00 | -2,770536152 | 2,80E+00  | 9,41E-02 | 3,84E-01 | Tnn           | 0,16 | No  |
| ENSMUSG00000026726 | -5,51E-01 | -1,060731905 | 1,42E+00  | 2,33E-01 | 5,50E-01 | Cubn          | 0,68 | No  |
| ENSMUSG00000026727 | 3,28E-02  | 6,850227361  | 2,86E-01  | 5,93E-01 | 8,42E-01 | Rsu1          | 1,02 | No  |
| ENSMUSG00000026728 | -3,66E-02 | 11,75953715  | 4,30E-01  | 5,12E-01 | 7,95E-01 | Vim           | 0,97 | No  |
| ENSMUSG00000026729 | -2,64E-01 | 2,129456618  | 3,49E+00  | 6,18E-02 | 3,09E-01 | 4930562F07Rik | 0,83 | No  |
| ENSMUSG00000026730 | 3,45E-01  | 2,870549906  | 8,43E+00  | 3,69E-03 | 4,46E-02 | Pter          | 1,27 | Yes |
| ENSMUSG00000026734 | 1,85E+00  | -3,107657832 | 1,35E+00  | 2,46E-01 | 5,50E-01 | 4921504E06Rik | 3,61 | No  |
| ENSMUSG00000026735 | 1,60E+00  | -2,378335931 | 1,75E+00  | 1,86E-01 | 5,50E-01 | Ptf1a         | 3,03 | No  |
| ENSMUSG00000026736 | -1,62E-01 | 0,070698299  | 3,22E-01  | 5,71E-01 | 8,31E-01 | 4930426L09Rik | 0,89 | No  |
| ENSMUSG00000026737 | -1,50E-01 | 7,658776114  | 6,47E+00  | 1,10E-02 | 9,98E-02 | Pip4k2a       | 0,90 | No  |
| ENSMUSG00000026739 | -7,90E-02 | 5,17232719   | 1,21E+00  | 2,72E-01 | 5,68E-01 | Bmi1          | 0,95 | No  |
| ENSMUSG00000026740 | -9,56E-02 | 5,982650957  | 2,14E+00  | 1,44E-01 | 4,79E-01 | Dnajc1        | 0,94 | No  |
| ENSMUSG00000026743 | -1,27E-01 | 5,541318056  | 3,39E+00  | 6,55E-02 | 3,21E-01 | Mllt10        | 0,92 | No  |
| ENSMUSG00000026748 | -5,84E-03 | 8,338013023  | 1,02E-02  | 9,20E-01 | 1,00E+00 | Plxdc2        | 1,00 | No  |

|                    |           |              |          |          |          |               |      |     |
|--------------------|-----------|--------------|----------|----------|----------|---------------|------|-----|
| ENSMUSG00000026749 | -1,98E-02 | 8,097487394  | 1,16E-01 | 7,33E-01 | 9,23E-01 | Nek6          | 0,99 | No  |
| ENSMUSG00000026750 | -4,73E-02 | 5,369041467  | 4,51E-01 | 5,02E-01 | 7,87E-01 | Psemb7        | 0,97 | No  |
| ENSMUSG00000026751 | -2,75E+00 | -2,963216826 | 2,99E+00 | 8,38E-02 | 3,71E-01 | Nr5a1         | 0,15 | No  |
| ENSMUSG00000026753 | 5,15E-02  | 5,932940979  | 6,11E-01 | 4,34E-01 | 7,27E-01 | Ppp6c         | 1,04 | No  |
| ENSMUSG00000026754 | -8,03E-02 | 4,042006007  | 8,61E-01 | 3,53E-01 | 6,55E-01 | Golga1        | 0,95 | No  |
| ENSMUSG00000026755 | 7,71E-03  | 5,869322433  | 1,35E-02 | 9,07E-01 | 1,00E+00 | Arpc5l        | 1,01 | No  |
| ENSMUSG00000026761 | 7,28E-02  | 4,60173899   | 8,52E-01 | 3,56E-01 | 6,57E-01 | Orc4          | 1,05 | No  |
| ENSMUSG00000026764 | 4,11E-01  | 3,119974713  | 1,44E+01 | 1,45E-04 | 3,30E-03 | Kif5c         | 1,33 | Yes |
| ENSMUSG00000026765 | -4,28E-01 | -2,35553828  | 1,87E-01 | 6,65E-01 | 8,85E-01 | Lypd6b        | 0,74 | No  |
| ENSMUSG00000026766 | 8,17E-02  | 5,360977797  | 1,34E+00 | 2,47E-01 | 5,50E-01 | Mmadhc        | 1,06 | No  |
| ENSMUSG00000026767 | 7,40E-02  | 4,889750138  | 9,55E-01 | 3,29E-01 | 6,29E-01 | Mindy3        | 1,05 | No  |
| ENSMUSG00000026768 | 8,72E-01  | -2,015666061 | 1,17E+00 | 2,79E-01 | 5,76E-01 | Itga8         | 1,83 | No  |
| ENSMUSG00000026770 | -5,26E-01 | 6,601623398  | 7,17E+01 | 2,47E-17 | 4,75E-15 | Il2ra         | 0,69 | Yes |
| ENSMUSG00000026771 | -5,13E-02 | 5,555448917  | 5,60E-01 | 4,54E-01 | 7,44E-01 | Spopl         | 0,97 | No  |
| ENSMUSG00000026773 | -2,75E-01 | 6,170180656  | 1,86E+01 | 1,65E-05 | 5,22E-04 | Pfkfb3        | 0,83 | Yes |
| ENSMUSG00000026774 | -9,57E-02 | -2,770631803 | 6,20E-03 | 9,37E-01 | 1,00E+00 | 4931423N10Rik | 0,94 | No  |
| ENSMUSG00000026775 | -2,56E-02 | 6,616398887  | 1,70E-01 | 6,80E-01 | 8,93E-01 | Yme11l        | 0,98 | No  |
| ENSMUSG00000026778 | 3,16E-01  | 2,468143841  | 5,75E+00 | 1,65E-02 | 1,34E-01 | Prkcq         | 1,24 | No  |
| ENSMUSG00000026779 | 3,42E-01  | 4,301882152  | 1,67E+01 | 4,36E-05 | 1,21E-03 | Mastl         | 1,27 | Yes |
| ENSMUSG00000026781 | 1,95E-01  | 5,748922372  | 8,36E+00 | 3,84E-03 | 4,59E-02 | Acbd5         | 1,14 | Yes |
| ENSMUSG00000026782 | 1,12E-02  | 5,031211069  | 2,29E-02 | 8,80E-01 | 1,00E+00 | Abi2          | 1,01 | No  |
| ENSMUSG00000026784 | 2,94E-01  | 2,93849279   | 6,50E+00 | 1,08E-02 | 9,89E-02 | Pdss1         | 1,23 | No  |
| ENSMUSG00000026785 | 2,73E-01  | 3,349990531  | 6,99E+00 | 8,21E-03 | 8,06E-02 | Pkn3          | 1,21 | No  |
| ENSMUSG00000026786 | 6,88E-02  | 6,515618025  | 1,20E+00 | 2,73E-01 | 5,69E-01 | Apbb1ip       | 1,05 | No  |
| ENSMUSG00000026788 | -1,56E-01 | 4,680295272  | 3,94E+00 | 4,73E-02 | 2,60E-01 | Zbtb43        | 0,90 | No  |
| ENSMUSG00000026790 | 1,72E-01  | 6,374849638  | 7,39E+00 | 6,56E-03 | 6,85E-02 | Odf2          | 1,13 | No  |
| ENSMUSG00000026791 | 2,05E-02  | 4,088473189  | 5,54E-02 | 8,14E-01 | 9,68E-01 | Slc2a8        | 1,01 | No  |
| ENSMUSG00000026792 | -6,70E-02 | 4,235004599  | 6,32E-01 | 4,27E-01 | 7,21E-01 | Lrsam1        | 0,95 | No  |
| ENSMUSG00000026796 | 1,93E-01  | 8,816966924  | 1,14E+01 | 7,18E-04 | 1,23E-02 | Fam129b       | 1,14 | Yes |
| ENSMUSG00000026797 | -1,71E-01 | 4,014967471  | 3,74E+00 | 5,31E-02 | 2,81E-01 | Stxbp1        | 0,89 | No  |
| ENSMUSG00000026798 | 8,45E-02  | 2,587732373  | 4,51E-01 | 5,02E-01 | 7,87E-01 | Coq4          | 1,06 | No  |
| ENSMUSG00000026799 | -9,05E-02 | 3,606017322  | 8,61E-01 | 3,53E-01 | 6,55E-01 | Med27         | 0,94 | No  |

|                    |           |              |          |          |          |               |      |     |
|--------------------|-----------|--------------|----------|----------|----------|---------------|------|-----|
| ENSMUSG00000026803 | 8,29E-02  | 4,252365399  | 9,91E-01 | 3,20E-01 | 6,20E-01 | Ttf1          | 1,06 | No  |
| ENSMUSG00000026805 | 2,67E-01  | -1,740797509 | 1,64E-01 | 6,85E-01 | 8,97E-01 | Barhl1        | 1,20 | No  |
| ENSMUSG00000026806 | 3,34E-01  | 3,689325734  | 1,23E+01 | 4,54E-04 | 8,48E-03 | Ddx31         | 1,26 | Yes |
| ENSMUSG00000026807 | 3,76E-01  | 3,683177093  | 1,49E+01 | 1,13E-04 | 2,69E-03 | Ak8           | 1,30 | Yes |
| ENSMUSG00000026809 | 3,97E-01  | 2,172921971  | 7,45E+00 | 6,36E-03 | 6,70E-02 | Spaca9        | 1,32 | No  |
| ENSMUSG00000026810 | 3,77E-02  | 5,051925814  | 2,64E-01 | 6,07E-01 | 8,50E-01 | Dpm2          | 1,03 | No  |
| ENSMUSG00000026811 | -1,40E-01 | 5,985441384  | 4,60E+00 | 3,20E-02 | 2,08E-01 | St6galnac6    | 0,91 | No  |
| ENSMUSG00000026812 | -2,00E-01 | 6,21294642   | 9,79E+00 | 1,75E-03 | 2,52E-02 | Tsc1          | 0,87 | Yes |
| ENSMUSG00000026814 | 8,04E-02  | 5,421060099  | 1,32E+00 | 2,50E-01 | 5,50E-01 | Eng           | 1,06 | No  |
| ENSMUSG00000026815 | -1,83E-01 | 2,52556343   | 2,01E+00 | 1,56E-01 | 5,01E-01 | Gfi1b         | 0,88 | No  |
| ENSMUSG00000026816 | 1,07E-01  | 4,657990254  | 1,85E+00 | 1,73E-01 | 5,30E-01 | Gtf3c5        | 1,08 | No  |
| ENSMUSG00000026817 | 1,48E-01  | 3,466999004  | 2,15E+00 | 1,43E-01 | 4,77E-01 | Ak1           | 1,11 | No  |
| ENSMUSG00000026818 | -1,90E+00 | -2,832003574 | 1,44E+00 | 2,30E-01 | 5,50E-01 | Cel           | 0,27 | No  |
| ENSMUSG00000026819 | 9,58E-02  | 4,935471428  | 1,63E+00 | 2,01E-01 | 5,50E-01 | Slc25a25      | 1,07 | No  |
| ENSMUSG00000026820 | 9,70E-02  | 4,354831669  | 1,37E+00 | 2,43E-01 | 5,50E-01 | Ptges2        | 1,07 | No  |
| ENSMUSG00000026821 | 7,19E-03  | 7,43193697   | 1,45E-02 | 9,04E-01 | 1,00E+00 | Ralgs         | 1,00 | No  |
| ENSMUSG00000026822 | -4,09E-01 | 0,144516729  | 2,25E+00 | 1,34E-01 | 4,60E-01 | Lcn2          | 0,75 | No  |
| ENSMUSG00000026825 | -1,01E+00 | -0,945891564 | 5,60E+00 | 1,80E-02 | 1,41E-01 | Dnm1          | 0,50 | No  |
| ENSMUSG00000026826 | -1,74E-02 | 3,791890324  | 3,32E-02 | 8,55E-01 | 9,92E-01 | Nr4a2         | 0,99 | No  |
| ENSMUSG00000026827 | 3,14E-02  | 6,034925418  | 2,32E-01 | 6,30E-01 | 8,62E-01 | Gpd2          | 1,02 | No  |
| ENSMUSG00000026829 | 3,38E-01  | 4,217392982  | 1,55E+01 | 8,10E-05 | 2,03E-03 | Gbgt1         | 1,26 | Yes |
| ENSMUSG00000026831 | -7,81E-02 | 0,112144439  | 7,56E-02 | 7,83E-01 | 9,50E-01 | 1700007K13Rik | 0,95 | No  |
| ENSMUSG00000026832 | -6,74E-01 | 9,098191538  | 1,40E+02 | 3,09E-32 | 2,02E-29 | Cytip         | 0,63 | Yes |
| ENSMUSG00000026833 | 3,22E-01  | 8,457258053  | 3,12E+01 | 2,37E-08 | 1,52E-06 | Olfm1         | 1,25 | Yes |
| ENSMUSG00000026834 | -2,50E+00 | -1,509915217 | 1,59E+01 | 6,80E-05 | 1,76E-03 | Acvr1c        | 0,18 | Yes |
| ENSMUSG00000026835 | -1,22E+00 | -1,963243315 | 3,56E+00 | 5,94E-02 | 3,01E-01 | Fcnb          | 0,43 | No  |
| ENSMUSG00000026836 | 2,70E-02  | 4,087942381  | 9,61E-02 | 7,57E-01 | 9,35E-01 | Acvr1         | 1,02 | No  |
| ENSMUSG00000026837 | -1,79E-01 | 1,978153822  | 1,42E+00 | 2,33E-01 | 5,50E-01 | Col5a1        | 0,88 | No  |
| ENSMUSG00000026839 | 3,18E-01  | 0,036637239  | 1,32E+00 | 2,51E-01 | 5,50E-01 | Upp2          | 1,25 | No  |
| ENSMUSG00000026840 | 1,87E+00  | -3,107639691 | 1,38E+00 | 2,40E-01 | 5,50E-01 | Lamc3         | 3,67 | No  |
| ENSMUSG00000026841 | -6,22E-02 | -2,711722651 | 3,52E-03 | 9,53E-01 | 1,00E+00 | Fibcd1        | 0,96 | No  |
| ENSMUSG00000026842 | 4,56E-02  | 6,727040491  | 5,43E-01 | 4,61E-01 | 7,50E-01 | Abl1          | 1,03 | No  |

|                    |           |              |           |          |          |          |      |     |
|--------------------|-----------|--------------|-----------|----------|----------|----------|------|-----|
| ENSMUSG00000026843 | 4,01E-02  | 5,013593183  | 2,96E-01  | 5,86E-01 | 8,39E-01 | Fubp3    | 1,03 | No  |
| ENSMUSG00000026848 | 8,94E-02  | 6,405895817  | 2,00E+00  | 1,57E-01 | 5,03E-01 | Tor1b    | 1,06 | No  |
| ENSMUSG00000026849 | 9,93E-02  | 5,590557411  | 2,09E+00  | 1,48E-01 | 4,88E-01 | Tor1a    | 1,07 | No  |
| ENSMUSG00000026851 | 3,49E-03  | 4,668501906  | 1,99E-03  | 9,64E-01 | 1,00E+00 | BC005624 | 1,00 | No  |
| ENSMUSG00000026853 | 2,41E-01  | 7,107028871  | 1,59E+01  | 6,82E-05 | 1,76E-03 | Crat     | 1,18 | Yes |
| ENSMUSG00000026854 | 1,01E-01  | 4,238847313  | 1,43E+00  | 2,32E-01 | 5,50E-01 | Usp20    | 1,07 | No  |
| ENSMUSG00000026856 | 2,12E-01  | 5,758939547  | 9,97E+00  | 1,59E-03 | 2,33E-02 | Dolpp1   | 1,16 | Yes |
| ENSMUSG00000026857 | -3,96E-02 | 4,744633809  | 2,64E-01  | 6,07E-01 | 8,50E-01 | Ntmt1    | 0,97 | No  |
| ENSMUSG00000026858 | 3,36E-01  | 4,11671521   | 1,48E+01  | 1,20E-04 | 2,83E-03 | Miga2    | 1,26 | Yes |
| ENSMUSG00000026860 | 6,77E-02  | 5,625513923  | 9,88E-01  | 3,20E-01 | 6,21E-01 | Sh3glb2  | 1,05 | No  |
| ENSMUSG00000026864 | 1,05E-01  | 9,63009923   | 3,44E+00  | 6,35E-02 | 3,15E-01 | Hspa5    | 1,08 | No  |
| ENSMUSG00000026866 | -2,90E-01 | 5,40327871   | 1,76E+01  | 2,73E-05 | 8,08E-04 | Kynu     | 0,82 | Yes |
| ENSMUSG00000026867 | 2,99E-02  | 7,026591091  | 2,44E-01  | 6,21E-01 | 8,57E-01 | Gapvd1   | 1,02 | No  |
| ENSMUSG00000026869 | 6,34E-02  | 5,355886323  | 8,13E-01  | 3,67E-01 | 6,68E-01 | Psm5     | 1,04 | No  |
| ENSMUSG00000026870 | -6,88E-02 | -2,896141077 | 2,08E-03  | 9,64E-01 | 1,00E+00 | Cutal    | 0,95 | No  |
| ENSMUSG00000026872 | 3,13E-01  | 8,117130798  | 2,89E+01  | 7,57E-08 | 4,32E-06 | Zeb2     | 1,24 | Yes |
| ENSMUSG00000026873 | 2,36E-01  | 3,751698864  | 6,44E+00  | 1,11E-02 | 1,01E-01 | Phf19    | 1,18 | No  |
| ENSMUSG00000026874 | -8,55E-01 | -1,522665633 | 2,89E+00  | 8,89E-02 | 3,79E-01 | Hc       | 0,55 | No  |
| ENSMUSG00000026875 | -6,63E-01 | 6,888834569  | 1,18E+02  | 1,52E-27 | 6,92E-25 | Traf1    | 0,63 | Yes |
| ENSMUSG00000026878 | -4,42E-02 | 8,267311629  | 5,87E-01  | 4,44E-01 | 7,35E-01 | Rab14    | 0,97 | No  |
| ENSMUSG00000026879 | 8,78E-02  | 8,546084459  | 2,34E+00  | 1,26E-01 | 4,45E-01 | Gsn      | 1,06 | No  |
| ENSMUSG00000026880 | 8,17E-02  | 6,87242582   | 1,78E+00  | 1,82E-01 | 5,43E-01 | Stom     | 1,06 | No  |
| ENSMUSG00000026883 | -2,31E-01 | 0,804408196  | 1,08E+00  | 2,99E-01 | 5,95E-01 | Dab2ip   | 0,85 | No  |
| ENSMUSG00000026885 | -3,84E-01 | 0,962241544  | 3,36E+00  | 6,67E-02 | 3,25E-01 | Ttll11   | 0,77 | No  |
| ENSMUSG00000026887 | 5,26E-03  | 3,205778998  | 2,47E-03  | 9,60E-01 | 1,00E+00 | Mrrf     | 1,00 | No  |
| ENSMUSG00000026888 | -5,46E-01 | -1,472857174 | 1,07E+00  | 3,02E-01 | 5,98E-01 | Grb14    | 0,68 | No  |
| ENSMUSG00000026889 | -9,10E-02 | 5,02073883   | 1,50E+00  | 2,20E-01 | 5,50E-01 | Rbm18    | 0,94 | No  |
| ENSMUSG00000026890 | 9,01E-03  | -3,107646452 | -5,16E-10 | 1,00E+00 | 1,00E+00 | Lhx6     | 1,01 | No  |
| ENSMUSG00000026893 | -3,89E-01 | 3,593378525  | 1,66E+01  | 4,52E-05 | 1,25E-03 | Gca      | 0,76 | Yes |
| ENSMUSG00000026894 | -5,57E-01 | -2,711723534 | 2,43E-01  | 6,22E-01 | 8,58E-01 | Morn5    | 0,68 | No  |
| ENSMUSG00000026895 | 1,57E-02  | 5,656181126  | 5,32E-02  | 8,18E-01 | 9,70E-01 | Ndufa8   | 1,01 | No  |
| ENSMUSG00000026896 | 7,42E-04  | 5,098268132  | 1,05E-04  | 9,92E-01 | 1,00E+00 | Ifih1    | 1,00 | No  |

|                    |           |              |          |          |          |         |      |     |
|--------------------|-----------|--------------|----------|----------|----------|---------|------|-----|
| ENSMUSG00000026904 | -7,48E-01 | -2,448680383 | 6,28E-01 | 4,28E-01 | 7,22E-01 | Slc4a10 | 0,60 | No  |
| ENSMUSG00000026914 | -5,72E-02 | 5,790007271  | 7,32E-01 | 3,92E-01 | 6,93E-01 | Psmid14 | 0,96 | No  |
| ENSMUSG00000026915 | -4,87E-01 | 4,103626958  | 3,18E+01 | 1,71E-08 | 1,12E-06 | Strbp   | 0,71 | Yes |
| ENSMUSG00000026917 | 5,27E-02  | 5,45573183   | 5,74E-01 | 4,49E-01 | 7,39E-01 | Wdr5    | 1,04 | No  |
| ENSMUSG00000026918 | 1,61E-01  | 5,11159878   | 4,96E+00 | 2,60E-02 | 1,80E-01 | Brd3    | 1,12 | No  |
| ENSMUSG00000026919 | 1,87E+00  | -3,107639691 | 1,38E+00 | 2,40E-01 | 5,50E-01 | Lcn4    | 3,67 | No  |
| ENSMUSG00000026921 | -1,97E-01 | -0,401308161 | 3,11E-01 | 5,77E-01 | 8,35E-01 | Egfl7   | 0,87 | No  |
| ENSMUSG00000026922 | 9,24E-02  | 4,424182785  | 1,28E+00 | 2,57E-01 | 5,50E-01 | Agpat2  | 1,07 | No  |
| ENSMUSG00000026923 | 1,62E-01  | 7,812968713  | 7,59E+00 | 5,86E-03 | 6,30E-02 | Notch1  | 1,12 | No  |
| ENSMUSG00000026924 | 8,05E-02  | 7,357549246  | 1,82E+00 | 1,77E-01 | 5,36E-01 | Sec16a  | 1,06 | No  |
| ENSMUSG00000026925 | 7,78E-02  | 5,36183559   | 1,23E+00 | 2,68E-01 | 5,65E-01 | Inpp5e  | 1,06 | No  |
| ENSMUSG00000026926 | -8,14E-02 | 6,272025443  | 1,62E+00 | 2,03E-01 | 5,50E-01 | Pmpca   | 0,95 | No  |
| ENSMUSG00000026927 | -3,43E-02 | 5,936261111  | 2,70E-01 | 6,03E-01 | 8,48E-01 | Sdccag3 | 0,98 | No  |
| ENSMUSG00000026928 | 3,12E-02  | 6,818473158  | 2,58E-01 | 6,11E-01 | 8,52E-01 | Card9   | 1,02 | No  |
| ENSMUSG00000026930 | -1,49E-01 | 2,94546763   | 1,72E+00 | 1,90E-01 | 5,50E-01 | Gpsm1   | 0,90 | No  |
| ENSMUSG00000026932 | 6,61E-02  | 4,998332078  | 7,93E-01 | 3,73E-01 | 6,74E-01 | Nacc2   | 1,05 | No  |
| ENSMUSG00000026933 | 1,82E-01  | 4,491480283  | 5,18E+00 | 2,29E-02 | 1,65E-01 | Camsap1 | 1,13 | No  |
| ENSMUSG00000026937 | -2,63E-02 | -3,033641358 | 2,33E-04 | 9,88E-01 | 1,00E+00 | Lcn5    | 0,98 | No  |
| ENSMUSG00000026938 | -2,87E-01 | 1,064272823  | 1,98E+00 | 1,60E-01 | 5,07E-01 | Fcna    | 0,82 | No  |
| ENSMUSG00000026939 | 1,65E-01  | 3,526924293  | 2,69E+00 | 1,01E-01 | 3,92E-01 | Tmem141 | 1,12 | No  |
| ENSMUSG00000026940 | 3,48E-01  | -2,311213564 | 2,08E-01 | 6,49E-01 | 8,75E-01 | Ccdc183 | 1,27 | No  |
| ENSMUSG00000026941 | 1,30E-01  | 2,431889566  | 9,80E-01 | 3,22E-01 | 6,23E-01 | Mamdc4  | 1,09 | No  |
| ENSMUSG00000026942 | -1,41E-01 | 4,708647233  | 3,41E+00 | 6,49E-02 | 3,19E-01 | Traf2   | 0,91 | No  |
| ENSMUSG00000026943 | -4,37E-01 | -2,600662862 | 1,95E-01 | 6,59E-01 | 8,81E-01 | Lcn12   | 0,74 | No  |
| ENSMUSG00000026944 | 8,14E-02  | 6,365610387  | 1,64E+00 | 2,00E-01 | 5,50E-01 | Abca2   | 1,06 | No  |
| ENSMUSG00000026946 | -7,48E-02 | 3,7111085534 | 6,36E-01 | 4,25E-01 | 7,19E-01 | Nmi     | 0,95 | No  |
| ENSMUSG00000026950 | 2,76E-01  | 1,791747902  | 3,00E+00 | 8,33E-02 | 3,71E-01 | Neb     | 1,21 | No  |
| ENSMUSG00000026955 | 2,82E-01  | 3,042265902  | 6,48E+00 | 1,09E-02 | 9,95E-02 | Sapcd2  | 1,22 | No  |
| ENSMUSG00000026956 | 2,59E-01  | 6,894247546  | 1,79E+01 | 2,38E-05 | 7,22E-04 | Uap1l1  | 1,20 | Yes |
| ENSMUSG00000026958 | 1,09E-01  | 6,999786006  | 3,22E+00 | 7,28E-02 | 3,42E-01 | Dpp7    | 1,08 | No  |
| ENSMUSG00000026959 | -2,76E-01 | -1,322024619 | 2,83E-01 | 5,94E-01 | 8,43E-01 | Grin1   | 0,83 | No  |
| ENSMUSG00000026960 | 1,61E-01  | 4,28024513   | 3,65E+00 | 5,60E-02 | 2,90E-01 | Arl6ip6 | 1,12 | No  |

|                    |           |              |          |          |          |          |      |     |
|--------------------|-----------|--------------|----------|----------|----------|----------|------|-----|
| ENSMUSG00000026961 | -2,70E+00 | -3,033614577 | 2,89E+00 | 8,93E-02 | 3,79E-01 | Lrrc26   | 0,15 | No  |
| ENSMUSG00000026965 | -5,59E-02 | 6,961418765  | 8,47E-01 | 3,57E-01 | 6,59E-01 | Anapc2   | 0,96 | No  |
| ENSMUSG00000026966 | -1,18E-02 | 5,603345325  | 2,95E-02 | 8,64E-01 | 9,97E-01 | Ssna1    | 0,99 | No  |
| ENSMUSG00000026969 | 3,79E-02  | 2,881309745  | 1,05E-01 | 7,46E-01 | 9,29E-01 | Fam166a  | 1,03 | No  |
| ENSMUSG00000026970 | 5,38E-02  | 7,797593099  | 8,43E-01 | 3,59E-01 | 6,60E-01 | Rbms1    | 1,04 | No  |
| ENSMUSG00000026971 | -1,87E+00 | -3,107637761 | 1,39E+00 | 2,38E-01 | 5,50E-01 | Itgb6    | 0,27 | No  |
| ENSMUSG00000026972 | -1,28E-01 | 6,39592213   | 4,12E+00 | 4,23E-02 | 2,45E-01 | Arrdc1   | 0,92 | No  |
| ENSMUSG00000026974 | -6,24E-02 | 4,252479146  | 5,50E-01 | 4,58E-01 | 7,47E-01 | Zmynd19  | 0,96 | No  |
| ENSMUSG00000026975 | -1,43E-01 | 3,233979976  | 1,83E+00 | 1,77E-01 | 5,36E-01 | Dph7     | 0,91 | No  |
| ENSMUSG00000026976 | -1,89E-01 | -0,762854221 | 1,93E-01 | 6,61E-01 | 8,82E-01 | Pax8     | 0,88 | No  |
| ENSMUSG00000026977 | -1,32E-01 | 6,637062811  | 4,53E+00 | 3,32E-02 | 2,14E-01 | March7   | 0,91 | No  |
| ENSMUSG00000026979 | 1,33E-01  | 7,680828143  | 5,13E+00 | 2,35E-02 | 1,68E-01 | Psd4     | 1,10 | No  |
| ENSMUSG00000026980 | -5,58E-01 | 6,268193191  | 7,68E+01 | 1,91E-18 | 3,87E-16 | Ly75     | 0,68 | Yes |
| ENSMUSG00000026981 | -1,50E-01 | 7,564985026  | 6,44E+00 | 1,11E-02 | 1,01E-01 | Il1rn    | 0,90 | No  |
| ENSMUSG00000026984 | -2,71E+00 | -3,033620915 | 2,92E+00 | 8,75E-02 | 3,78E-01 | Il1f6    | 0,15 | No  |
| ENSMUSG00000026985 | 1,81E+00  | -3,10765737  | 1,28E+00 | 2,58E-01 | 5,50E-01 | Il1f8    | 3,49 | No  |
| ENSMUSG00000026986 | 1,89E-01  | 2,276782534  | 1,80E+00 | 1,80E-01 | 5,42E-01 | Hnmt     | 1,14 | No  |
| ENSMUSG00000026987 | 3,45E-03  | 6,772442651  | 3,13E-03 | 9,55E-01 | 1,00E+00 | Baz2b    | 1,00 | No  |
| ENSMUSG00000026988 | -1,29E-01 | 3,412697898  | 1,62E+00 | 2,02E-01 | 5,50E-01 | Wdsub1   | 0,91 | No  |
| ENSMUSG00000026989 | 1,81E+00  | -3,10765737  | 1,28E+00 | 2,58E-01 | 5,50E-01 | Dapl1    | 3,49 | No  |
| ENSMUSG00000026991 | 1,35E-01  | 5,845680287  | 4,11E+00 | 4,27E-02 | 2,46E-01 | Pkp4     | 1,10 | No  |
| ENSMUSG00000026994 | 3,38E-01  | 5,076020151  | 2,08E+01 | 5,19E-06 | 1,87E-04 | Galnt3   | 1,26 | Yes |
| ENSMUSG00000026999 | 1,82E-01  | 2,504267735  | 2,03E+00 | 1,55E-01 | 4,98E-01 | Nup35    | 1,13 | No  |
| ENSMUSG00000027001 | 1,02E-01  | 3,220005697  | 9,44E-01 | 3,31E-01 | 6,32E-01 | Dusp19   | 1,07 | No  |
| ENSMUSG00000027002 | -9,30E-02 | 3,760163787  | 9,92E-01 | 3,19E-01 | 6,20E-01 | Nckap1   | 0,94 | No  |
| ENSMUSG00000027004 | -8,58E-01 | -1,015586885 | 4,24E+00 | 3,95E-02 | 2,36E-01 | Frzb     | 0,55 | No  |
| ENSMUSG00000027006 | -1,99E-01 | 6,943708271  | 1,08E+01 | 1,02E-03 | 1,65E-02 | Dnajc10  | 0,87 | Yes |
| ENSMUSG00000027007 | -1,79E-01 | 7,109456041  | 8,81E+00 | 2,99E-03 | 3,83E-02 | Ssfa2    | 0,88 | Yes |
| ENSMUSG00000027009 | -4,00E-01 | 6,718665663  | 4,21E+01 | 8,61E-11 | 8,27E-09 | Itga4    | 0,76 | Yes |
| ENSMUSG00000027010 | -3,53E-02 | 5,973736277  | 2,89E-01 | 5,91E-01 | 8,41E-01 | Slc25a12 | 0,98 | No  |
| ENSMUSG00000027011 | -7,05E-02 | 4,953090093  | 9,01E-01 | 3,43E-01 | 6,43E-01 | Ube2e3   | 0,95 | No  |
| ENSMUSG00000027012 | 2,84E-02  | 6,727389407  | 2,13E-01 | 6,44E-01 | 8,73E-01 | Dync1i2  | 1,02 | No  |

|                    |           |              |          |          |          |          |      |     |
|--------------------|-----------|--------------|----------|----------|----------|----------|------|-----|
| ENSMUSG00000027014 | 4,57E-02  | 3,83331036   | 2,49E-01 | 6,18E-01 | 8,55E-01 | Cwc22    | 1,03 | No  |
| ENSMUSG00000027015 | -1,30E+00 | -2,16571753  | 2,91E+00 | 8,82E-02 | 3,79E-01 | Cybrd1   | 0,40 | No  |
| ENSMUSG00000027018 | -8,78E-02 | 5,424010838  | 1,59E+00 | 2,07E-01 | 5,50E-01 | Hat1     | 0,94 | No  |
| ENSMUSG00000027030 | -1,49E-01 | 5,013706171  | 4,11E+00 | 4,27E-02 | 2,46E-01 | Stk39    | 0,90 | No  |
| ENSMUSG00000027035 | -1,35E-01 | 7,252967384  | 5,04E+00 | 2,48E-02 | 1,74E-01 | Cers6    | 0,91 | No  |
| ENSMUSG00000027048 | -5,72E-01 | -2,548220847 | 2,56E-01 | 6,13E-01 | 8,53E-01 | Abcb11   | 0,67 | No  |
| ENSMUSG00000027067 | 4,50E-02  | 7,258159697  | 5,64E-01 | 4,53E-01 | 7,42E-01 | Ssrp1    | 1,03 | No  |
| ENSMUSG00000027068 | 4,88E-01  | 6,341475769  | 5,87E+01 | 1,87E-14 | 2,70E-12 | Dhrs9    | 1,40 | Yes |
| ENSMUSG00000027070 | 1,12E+00  | -2,711765755 | 1,20E+00 | 2,74E-01 | 5,70E-01 | Lrp2     | 2,18 | No  |
| ENSMUSG00000027071 | -1,11E-02 | 0,448509577  | 2,15E-03 | 9,63E-01 | 1,00E+00 | P2rx3    | 0,99 | No  |
| ENSMUSG00000027072 | -2,55E+00 | -2,226305156 | 9,41E+00 | 2,16E-03 | 2,98E-02 | Prg3     | 0,17 | Yes |
| ENSMUSG00000027073 | -1,99E+00 | 1,392410197  | 1,16E+02 | 5,78E-27 | 2,44E-24 | Prg2     | 0,25 | Yes |
| ENSMUSG00000027074 | 3,89E-02  | 5,227320991  | 2,95E-01 | 5,87E-01 | 8,40E-01 | Slc43a3  | 1,03 | No  |
| ENSMUSG00000027075 | 4,53E-01  | -2,655122927 | 1,60E-01 | 6,89E-01 | 8,99E-01 | Slc43a1  | 1,37 | No  |
| ENSMUSG00000027076 | 1,64E-01  | 3,326665857  | 2,42E+00 | 1,20E-01 | 4,30E-01 | Timm10   | 1,12 | No  |
| ENSMUSG00000027078 | -3,30E-01 | 5,158244038  | 2,10E+01 | 4,51E-06 | 1,65E-04 | Ube2l6   | 0,80 | Yes |
| ENSMUSG00000027079 | 6,36E-02  | 3,842827876  | 4,80E-01 | 4,88E-01 | 7,75E-01 | Clp1     | 1,05 | No  |
| ENSMUSG00000027080 | 4,51E-02  | 4,227221836  | 2,86E-01 | 5,93E-01 | 8,42E-01 | Med19    | 1,03 | No  |
| ENSMUSG00000027082 | 1,19E-01  | 3,530739676  | 1,43E+00 | 2,32E-01 | 5,50E-01 | Tfpi     | 1,09 | No  |
| ENSMUSG00000027086 | 1,31E-01  | 3,311990166  | 1,57E+00 | 2,10E-01 | 5,50E-01 | Fastkd1  | 1,09 | No  |
| ENSMUSG00000027087 | 1,38E-01  | 5,747241438  | 4,21E+00 | 4,02E-02 | 2,38E-01 | Itgav    | 1,10 | No  |
| ENSMUSG00000027088 | 1,48E-01  | 4,319928929  | 3,20E+00 | 7,36E-02 | 3,45E-01 | Phospho2 | 1,11 | No  |
| ENSMUSG00000027091 | -4,71E-02 | 5,389786839  | 4,50E-01 | 5,03E-01 | 7,87E-01 | Zc3h15   | 0,97 | No  |
| ENSMUSG00000027099 | 2,64E-02  | 4,424271891  | 1,03E-01 | 7,49E-01 | 9,30E-01 | Mtx2     | 1,02 | No  |
| ENSMUSG00000027104 | 1,11E-01  | 5,745876733  | 2,71E+00 | 9,97E-02 | 3,92E-01 | Atf2     | 1,08 | No  |
| ENSMUSG00000027107 | -3,49E-02 | -2,9632767   | 7,31E-11 | 1,00E+00 | 1,00E+00 | Chrna1   | 0,98 | No  |
| ENSMUSG00000027108 | -5,38E-02 | 5,213492904  | 5,62E-01 | 4,53E-01 | 7,43E-01 | Ola1     | 0,96 | No  |
| ENSMUSG00000027109 | -1,42E-04 | 6,574422248  | 5,16E-06 | 9,98E-01 | 1,00E+00 | Sp3      | 1,00 | No  |
| ENSMUSG00000027111 | -2,40E-01 | 5,072729516  | 1,09E+01 | 9,66E-04 | 1,57E-02 | Itga6    | 0,85 | Yes |
| ENSMUSG00000027115 | 2,23E-01  | 3,097081122  | 4,05E+00 | 4,42E-02 | 2,50E-01 | Kif18a   | 1,17 | No  |
| ENSMUSG00000027122 | -1,07E-02 | 4,37126684   | 1,70E-02 | 8,96E-01 | 1,00E+00 | Arl14ep  | 0,99 | No  |
| ENSMUSG00000027130 | 3,05E-02  | 6,537359012  | 2,38E-01 | 6,25E-01 | 8,60E-01 | Slc12a6  | 1,02 | No  |

|                    |           |              |          |          |          |               |      |     |
|--------------------|-----------|--------------|----------|----------|----------|---------------|------|-----|
| ENSMUSG00000027131 | -4,43E-03 | 5,038764857  | 3,60E-03 | 9,52E-01 | 1,00E+00 | Emc4          | 1,00 | No  |
| ENSMUSG00000027132 | 9,35E-02  | 4,398538012  | 1,32E+00 | 2,51E-01 | 5,50E-01 | Katnbl1       | 1,07 | No  |
| ENSMUSG00000027133 | -4,04E-02 | 4,668546313  | 2,67E-01 | 6,05E-01 | 8,49E-01 | Nop10         | 0,97 | No  |
| ENSMUSG00000027134 | -1,12E-01 | 5,261275132  | 2,48E+00 | 1,15E-01 | 4,20E-01 | Lpcat4        | 0,93 | No  |
| ENSMUSG00000027160 | 1,93E-01  | 3,557098047  | 3,88E+00 | 4,89E-02 | 2,67E-01 | Ccdc34        | 1,14 | No  |
| ENSMUSG00000027162 | 4,07E-02  | 6,651740824  | 4,29E-01 | 5,13E-01 | 7,95E-01 | Lin7c         | 1,03 | No  |
| ENSMUSG00000027163 | 1,67E-01  | 4,320564769  | 4,01E+00 | 4,51E-02 | 2,53E-01 | Commd9        | 1,12 | No  |
| ENSMUSG00000027164 | -3,10E-01 | 7,151770668  | 2,64E+01 | 2,71E-07 | 1,37E-05 | Traf6         | 0,81 | Yes |
| ENSMUSG00000027165 | -1,25E-01 | 2,733527448  | 1,07E+00 | 3,01E-01 | 5,97E-01 | B230118H07Rik | 0,92 | No  |
| ENSMUSG00000027166 | 1,62E-01  | 2,792871293  | 1,78E+00 | 1,82E-01 | 5,45E-01 | Dnajc24       | 1,12 | No  |
| ENSMUSG00000027167 | 7,09E-02  | 2,568300198  | 3,04E-01 | 5,81E-01 | 8,37E-01 | Elp4          | 1,05 | No  |
| ENSMUSG00000027168 | 8,66E-01  | -0,78588827  | 4,55E+00 | 3,29E-02 | 2,12E-01 | Pax6          | 1,82 | No  |
| ENSMUSG00000027170 | -2,15E-01 | 3,767744788  | 5,29E+00 | 2,14E-02 | 1,58E-01 | Eif3m         | 0,86 | No  |
| ENSMUSG00000027171 | -4,97E-01 | 3,184313367  | 2,26E+01 | 1,99E-06 | 8,09E-05 | Prrg4         | 0,71 | Yes |
| ENSMUSG00000027173 | -2,46E-01 | 3,927186514  | 7,72E+00 | 5,45E-03 | 5,95E-02 | Depdc7        | 0,84 | No  |
| ENSMUSG00000027175 | 7,08E-03  | 5,912821947  | 1,16E-02 | 9,14E-01 | 1,00E+00 | Tcp11l1       | 1,00 | No  |
| ENSMUSG00000027176 | 6,72E-02  | 5,038472405  | 8,49E-01 | 3,57E-01 | 6,58E-01 | Cstf3         | 1,05 | No  |
| ENSMUSG00000027177 | 9,19E-03  | 7,400720532  | 2,39E-02 | 8,77E-01 | 1,00E+00 | Hipk3         | 1,01 | No  |
| ENSMUSG00000027180 | 1,40E-01  | 5,768286804  | 4,36E+00 | 3,68E-02 | 2,28E-01 | Fbxo3         | 1,10 | No  |
| ENSMUSG00000027184 | 4,18E-02  | 8,463040067  | 5,30E-01 | 4,67E-01 | 7,55E-01 | Caprin1       | 1,03 | No  |
| ENSMUSG00000027185 | 1,03E-01  | 4,923000724  | 1,90E+00 | 1,68E-01 | 5,23E-01 | Nat10         | 1,07 | No  |
| ENSMUSG00000027186 | 1,85E+00  | -3,107657832 | 1,35E+00 | 2,46E-01 | 5,50E-01 | Elf5          | 3,61 | No  |
| ENSMUSG00000027187 | -6,25E-02 | 7,526081091  | 1,12E+00 | 2,91E-01 | 5,86E-01 | Cat           | 0,96 | No  |
| ENSMUSG00000027188 | -6,90E-02 | -1,424765017 | 1,67E-02 | 8,97E-01 | 1,00E+00 | Pamr1         | 0,95 | No  |
| ENSMUSG00000027189 | -5,60E-04 | 6,682486474  | 8,20E-05 | 9,93E-01 | 1,00E+00 | Trim44        | 1,00 | No  |
| ENSMUSG00000027193 | 4,90E-02  | 7,319347739  | 6,73E-01 | 4,12E-01 | 7,08E-01 | Api5          | 1,03 | No  |
| ENSMUSG00000027194 | -1,26E-01 | 5,213920968  | 3,05E+00 | 8,08E-02 | 3,64E-01 | Ttc17         | 0,92 | No  |
| ENSMUSG00000027195 | 1,74E-01  | 6,582470686  | 7,77E+00 | 5,31E-03 | 5,84E-02 | Hsd17b12      | 1,13 | No  |
| ENSMUSG00000027196 | -7,77E-02 | 0,156069045  | 7,95E-02 | 7,78E-01 | 9,47E-01 | Alkbh3os1     | 0,95 | No  |
| ENSMUSG00000027198 | -4,01E-02 | 5,836875367  | 3,61E-01 | 5,48E-01 | 8,15E-01 | Ext2          | 0,97 | No  |
| ENSMUSG00000027199 | 3,91E-01  | 5,732612667  | 3,35E+01 | 7,08E-09 | 5,04E-07 | Gatm          | 1,31 | Yes |
| ENSMUSG00000027200 | -3,83E-02 | 7,847770662  | 4,28E-01 | 5,13E-01 | 7,95E-01 | Sema6d        | 0,97 | No  |



|                    |           |              |           |          |          |          |      |     |
|--------------------|-----------|--------------|-----------|----------|----------|----------|------|-----|
| ENSMUSG00000027201 | 9,47E-03  | 3,87725915   | 1,10E-02  | 9,16E-01 | 1,00E+00 | Myef2    | 1,01 | No  |
| ENSMUSG00000027202 | 3,14E-02  | -3,107617333 | -7,69E-10 | 1,00E+00 | 1,00E+00 | Slc12a1  | 1,02 | No  |
| ENSMUSG00000027203 | 1,40E-02  | 4,443297575  | 2,96E-02  | 8,63E-01 | 9,97E-01 | Dut      | 1,01 | No  |
| ENSMUSG00000027204 | -3,04E+00 | -1,246744336 | 2,83E+01  | 1,06E-07 | 5,90E-06 | Fbn1     | 0,12 | Yes |
| ENSMUSG00000027206 | -1,04E-01 | 6,124420825  | 2,59E+00  | 1,07E-01 | 4,01E-01 | Cops2    | 0,93 | No  |
| ENSMUSG00000027207 | 5,28E-02  | 5,852890289  | 6,32E-01  | 4,27E-01 | 7,21E-01 | Galk2    | 1,04 | No  |
| ENSMUSG00000027208 | -2,86E+00 | -2,226151693 | 7,91E+00  | 4,90E-03 | 5,52E-02 | Fgf7     | 0,14 | No  |
| ENSMUSG00000027209 | 2,97E-01  | 0,607390615  | 1,57E+00  | 2,10E-01 | 5,50E-01 | Fam227b  | 1,23 | No  |
| ENSMUSG00000027210 | 3,14E-02  | -3,107617333 | -7,69E-10 | 1,00E+00 | 1,00E+00 | Meis2    | 1,02 | No  |
| ENSMUSG00000027215 | 5,45E-02  | 6,159983587  | 7,13E-01  | 3,98E-01 | 6,98E-01 | Cd82     | 1,04 | No  |
| ENSMUSG00000027217 | -4,45E-01 | 1,38631987   | 5,74E+00  | 1,66E-02 | 1,34E-01 | Tspan18  | 0,73 | No  |
| ENSMUSG00000027219 | 3,10E-02  | 1,678139404  | 3,35E-02  | 8,55E-01 | 9,92E-01 | Slc28a2  | 1,02 | No  |
| ENSMUSG00000027220 | -2,24E+00 | -2,35552396  | 4,08E+00  | 4,34E-02 | 2,48E-01 | Syt13    | 0,21 | No  |
| ENSMUSG00000027221 | -1,85E-01 | -0,963078844 | 2,07E-01  | 6,49E-01 | 8,75E-01 | Chst1    | 0,88 | No  |
| ENSMUSG00000027222 | -1,10E-01 | 3,544077802  | 1,22E+00  | 2,70E-01 | 5,66E-01 | Pex16    | 0,93 | No  |
| ENSMUSG00000027223 | -4,96E-01 | -1,146021642 | 1,10E+00  | 2,95E-01 | 5,91E-01 | Mapk8ip1 | 0,71 | No  |
| ENSMUSG00000027224 | -1,94E+00 | -3,107619243 | 1,50E+00  | 2,21E-01 | 5,50E-01 | Duoxa1   | 0,26 | No  |
| ENSMUSG00000027227 | 1,06E-02  | 4,901126994  | 1,99E-02  | 8,88E-01 | 1,00E+00 | Sord     | 1,01 | No  |
| ENSMUSG00000027230 | 6,65E-02  | 2,744478231  | 3,01E-01  | 5,83E-01 | 8,38E-01 | Creb3l1  | 1,05 | No  |
| ENSMUSG00000027233 | -2,12E-01 | -1,655098213 | 1,21E-01  | 7,28E-01 | 9,20E-01 | Patl2    | 0,86 | No  |
| ENSMUSG00000027236 | 1,07E-01  | 5,392308729  | 2,34E+00  | 1,26E-01 | 4,44E-01 | Eif3j1   | 1,08 | No  |
| ENSMUSG00000027238 | -2,95E-01 | 1,240381741  | 2,65E+00  | 1,03E-01 | 3,95E-01 | Frmd5    | 0,82 | No  |
| ENSMUSG00000027239 | 3,97E-01  | 0,8726752    | 3,12E+00  | 7,74E-02 | 3,55E-01 | Mdk      | 1,32 | No  |
| ENSMUSG00000027242 | 1,97E-01  | 4,507886294  | 6,12E+00  | 1,34E-02 | 1,16E-01 | Wdr76    | 1,15 | No  |
| ENSMUSG00000027243 | -1,54E-01 | 1,924938678  | 1,06E+00  | 3,02E-01 | 5,99E-01 | Harbi1   | 0,90 | No  |
| ENSMUSG00000027244 | -3,10E-02 | 5,483991908  | 2,01E-01  | 6,54E-01 | 8,79E-01 | Atg13    | 0,98 | No  |
| ENSMUSG00000027245 | -5,92E-02 | 4,399117203  | 5,27E-01  | 4,68E-01 | 7,56E-01 | Hypk     | 0,96 | No  |
| ENSMUSG00000027246 | 1,74E-01  | -1,726139732 | 8,81E-02  | 7,67E-01 | 9,40E-01 | Ell3     | 1,13 | No  |
| ENSMUSG00000027247 | -7,41E-02 | 6,690476586  | 1,44E+00  | 2,31E-01 | 5,50E-01 | Arhgap1  | 0,95 | No  |
| ENSMUSG00000027248 | 1,01E-01  | 9,010849956  | 3,14E+00  | 7,65E-02 | 3,52E-01 | Pdia3    | 1,07 | No  |
| ENSMUSG00000027249 | -2,26E+00 | -2,497628959 | 4,14E+00  | 4,18E-02 | 2,43E-01 | F2       | 0,21 | No  |
| ENSMUSG00000027253 | -1,53E-01 | 3,88782587   | 2,84E+00  | 9,19E-02 | 3,82E-01 | Lrp4     | 0,90 | No  |

|                    |           |              |          |          |          |               |      |     |
|--------------------|-----------|--------------|----------|----------|----------|---------------|------|-----|
| ENSMUSG00000027254 | 2,13E-01  | -0,024683118 | 5,03E-01 | 4,78E-01 | 7,66E-01 | Map1a         | 1,16 | No  |
| ENSMUSG00000027255 | 1,17E-02  | 5,484865092  | 2,85E-02 | 8,66E-01 | 9,99E-01 | Arfgap2       | 1,01 | No  |
| ENSMUSG00000027257 | 6,07E-01  | -1,627495067 | 9,60E-01 | 3,27E-01 | 6,28E-01 | Pacsin3       | 1,52 | No  |
| ENSMUSG00000027259 | 2,82E-01  | 2,510519358  | 4,81E+00 | 2,83E-02 | 1,90E-01 | Adal          | 1,22 | No  |
| ENSMUSG00000027261 | -6,87E-02 | -2,600672294 | 4,30E-03 | 9,48E-01 | 1,00E+00 | Hao1          | 0,95 | No  |
| ENSMUSG00000027263 | -1,42E-01 | 5,599342424  | 4,37E+00 | 3,67E-02 | 2,28E-01 | Ubr1          | 0,91 | No  |
| ENSMUSG00000027272 | 3,43E-02  | 5,08785886   | 2,22E-01 | 6,38E-01 | 8,68E-01 | Ubr1          | 1,02 | No  |
| ENSMUSG00000027273 | 1,87E+00  | -3,107639691 | 1,38E+00 | 2,40E-01 | 5,50E-01 | Snap25        | 3,67 | No  |
| ENSMUSG00000027274 | 1,45E-01  | 4,259034878  | 3,01E+00 | 8,29E-02 | 3,70E-01 | Mkks          | 1,11 | No  |
| ENSMUSG00000027276 | 3,34E-02  | 2,890299172  | 8,76E-02 | 7,67E-01 | 9,40E-01 | Jag1          | 1,02 | No  |
| ENSMUSG00000027281 | 1,68E-01  | 3,669965252  | 3,11E+00 | 7,76E-02 | 3,56E-01 | Slx4ip        | 1,12 | No  |
| ENSMUSG00000027282 | -1,32E-02 | 5,629931244  | 3,72E-02 | 8,47E-01 | 9,87E-01 | Mtch2         | 0,99 | No  |
| ENSMUSG00000027284 | 1,89E-01  | 4,959582702  | 6,54E+00 | 1,06E-02 | 9,72E-02 | Cdan1         | 1,14 | No  |
| ENSMUSG00000027285 | -3,66E-02 | 4,526465218  | 2,06E-01 | 6,50E-01 | 8,76E-01 | Haus2         | 0,97 | No  |
| ENSMUSG00000027286 | 1,65E-01  | 3,901178886  | 3,27E+00 | 7,07E-02 | 3,36E-01 | Lrrc57        | 1,12 | No  |
| ENSMUSG00000027287 | -9,08E-03 | 7,106149179  | 2,27E-02 | 8,80E-01 | 1,00E+00 | Snap23        | 0,99 | No  |
| ENSMUSG00000027288 | -3,75E-02 | 8,527986436  | 4,26E-01 | 5,14E-01 | 7,96E-01 | Zfp106        | 0,97 | No  |
| ENSMUSG00000027291 | -1,02E-01 | 6,459127376  | 2,67E+00 | 1,03E-01 | 3,95E-01 | Vps39         | 0,93 | No  |
| ENSMUSG00000027293 | 1,73E-01  | 7,896033306  | 8,71E+00 | 3,17E-03 | 4,00E-02 | Ehd4          | 1,13 | Yes |
| ENSMUSG00000027296 | 4,00E-01  | 0,966236693  | 3,51E+00 | 6,09E-02 | 3,06E-01 | Itpka         | 1,32 | No  |
| ENSMUSG00000027297 | -9,56E-01 | -1,963179741 | 2,25E+00 | 1,34E-01 | 4,60E-01 | Ltk           | 0,52 | No  |
| ENSMUSG00000027298 | 4,09E-01  | 4,601479147  | 2,66E+01 | 2,56E-07 | 1,30E-05 | Tyro3         | 1,33 | Yes |
| ENSMUSG00000027300 | -8,74E-03 | 3,572544848  | 8,29E-03 | 9,27E-01 | 1,00E+00 | Ubox5         | 0,99 | No  |
| ENSMUSG00000027301 | -3,88E-03 | -3,03362684  | 4,02E-12 | 1,00E+00 | 1,00E+00 | Oxt           | 1,00 | No  |
| ENSMUSG00000027303 | 1,77E-01  | 6,260120603  | 7,66E+00 | 5,66E-03 | 6,12E-02 | Ptpra         | 1,13 | No  |
| ENSMUSG00000027304 | -6,58E-03 | 5,978883913  | 1,01E-02 | 9,20E-01 | 1,00E+00 | Rtf1          | 1,00 | No  |
| ENSMUSG00000027305 | -2,32E-02 | 3,442157735  | 5,35E-02 | 8,17E-01 | 9,70E-01 | Ndufaf1       | 0,98 | No  |
| ENSMUSG00000027306 | 1,89E-01  | 5,721907035  | 7,85E+00 | 5,07E-03 | 5,65E-02 | Nusap1        | 1,14 | No  |
| ENSMUSG00000027309 | 8,33E-02  | 5,470708293  | 1,43E+00 | 2,31E-01 | 5,50E-01 | 4930402H24Rik | 1,06 | No  |
| ENSMUSG00000027312 | 1,52E-01  | 6,05979848   | 5,44E+00 | 1,96E-02 | 1,49E-01 | Atrn          | 1,11 | No  |
| ENSMUSG00000027313 | 1,79E-01  | 0,804474162  | 7,06E-01 | 4,01E-01 | 6,99E-01 | Chac1         | 1,13 | No  |
| ENSMUSG00000027314 | -7,93E-01 | -0,682982517 | 3,18E+00 | 7,45E-02 | 3,47E-01 | Dll4          | 0,58 | No  |

|                    |           |              |          |          |          |               |      |     |
|--------------------|-----------|--------------|----------|----------|----------|---------------|------|-----|
| ENSMUSG00000027315 | 8,57E-02  | 8,758587484  | 2,25E+00 | 1,34E-01 | 4,61E-01 | Spint1        | 1,06 | No  |
| ENSMUSG00000027316 | -4,97E-01 | -1,366835406 | 9,01E-01 | 3,42E-01 | 6,43E-01 | Gfra4         | 0,71 | No  |
| ENSMUSG00000027317 | -8,83E-02 | -1,711729117 | 2,18E-02 | 8,83E-01 | 1,00E+00 | Ppp1r14d      | 0,94 | No  |
| ENSMUSG00000027318 | 7,98E-01  | 0,399072552  | 8,62E+00 | 3,33E-03 | 4,14E-02 | Adam33        | 1,74 | Yes |
| ENSMUSG00000027322 | 1,69E-01  | 3,978415396  | 3,49E+00 | 6,17E-02 | 3,09E-01 | Siglec1       | 1,12 | No  |
| ENSMUSG00000027323 | 1,31E-01  | 4,873747456  | 2,98E+00 | 8,41E-02 | 3,72E-01 | Rad51         | 1,09 | No  |
| ENSMUSG00000027324 | 1,14E-02  | 2,355346146  | 6,95E-03 | 9,34E-01 | 1,00E+00 | Rpusd2        | 1,01 | No  |
| ENSMUSG00000027326 | 1,48E-01  | 4,946822014  | 3,97E+00 | 4,63E-02 | 2,57E-01 | Knl1          | 1,11 | No  |
| ENSMUSG00000027327 | 7,34E-02  | 4,455544836  | 8,02E-01 | 3,70E-01 | 6,72E-01 | 1700037H04Rik | 1,05 | No  |
| ENSMUSG00000027329 | 2,73E-01  | 2,274323633  | 3,86E+00 | 4,96E-02 | 2,69E-01 | Spef1         | 1,21 | No  |
| ENSMUSG00000027330 | 2,14E-01  | 5,363836011  | 9,20E+00 | 2,42E-03 | 3,26E-02 | Cdc25b        | 1,16 | Yes |
| ENSMUSG00000027331 | 2,42E-01  | 4,720884279  | 9,89E+00 | 1,66E-03 | 2,41E-02 | Knstrn        | 1,18 | Yes |
| ENSMUSG00000027332 | -7,65E-02 | 6,524557436  | 1,49E+00 | 2,22E-01 | 5,50E-01 | Ivd           | 0,95 | No  |
| ENSMUSG00000027333 | -2,99E-01 | 6,185911007  | 2,13E+01 | 3,89E-06 | 1,46E-04 | Smox          | 0,81 | Yes |
| ENSMUSG00000027335 | -1,10E+00 | -2,863660892 | 7,07E-01 | 4,01E-01 | 6,99E-01 | Adra1d        | 0,47 | No  |
| ENSMUSG00000027338 | 7,92E-01  | -2,627655899 | 4,42E-01 | 5,06E-01 | 7,91E-01 | Prnd          | 1,73 | No  |
| ENSMUSG00000027339 | -3,69E-01 | 6,918031177  | 3,70E+01 | 1,19E-09 | 9,63E-08 | Rassf2        | 0,77 | Yes |
| ENSMUSG00000027340 | 1,98E-01  | 7,62019502   | 1,12E+01 | 8,13E-04 | 1,36E-02 | Slc23a2       | 1,15 | Yes |
| ENSMUSG00000027341 | 5,81E-02  | 4,769655959  | 5,67E-01 | 4,51E-01 | 7,41E-01 | Tmem230       | 1,04 | No  |
| ENSMUSG00000027342 | 5,67E-02  | 6,897254084  | 8,59E-01 | 3,54E-01 | 6,55E-01 | Pcna          | 1,04 | No  |
| ENSMUSG00000027344 | -3,59E+00 | -2,800973446 | 5,80E+00 | 1,60E-02 | 1,32E-01 | Fsip1         | 0,08 | No  |
| ENSMUSG00000027346 | -1,47E-01 | 6,623564885  | 5,63E+00 | 1,76E-02 | 1,39E-01 | Gpcpd1        | 0,90 | No  |
| ENSMUSG00000027347 | 2,48E-01  | 6,550066263  | 1,57E+01 | 7,33E-05 | 1,87E-03 | Rasgrp1       | 1,19 | Yes |
| ENSMUSG00000027349 | 7,41E-02  | 5,070497328  | 1,03E+00 | 3,11E-01 | 6,10E-01 | Fam98b        | 1,05 | No  |
| ENSMUSG00000027350 | 3,16E+00  | -2,770597723 | 4,06E+00 | 4,40E-02 | 2,50E-01 | Chgb          | 8,91 | No  |
| ENSMUSG00000027351 | -1,92E-01 | 7,035943078  | 1,00E+01 | 1,57E-03 | 2,31E-02 | Spred1        | 0,88 | Yes |
| ENSMUSG00000027353 | 1,65E-01  | 2,91307903   | 2,03E+00 | 1,54E-01 | 4,98E-01 | Mcm8          | 1,12 | No  |
| ENSMUSG00000027355 | -2,66E+00 | -3,033639428 | 2,81E+00 | 9,35E-02 | 3,83E-01 | Tmco5         | 0,16 | No  |
| ENSMUSG00000027356 | -1,86E+00 | -3,033612668 | 1,39E+00 | 2,38E-01 | 5,50E-01 | Fermt1        | 0,28 | No  |
| ENSMUSG00000027357 | 1,63E-01  | 3,918983656  | 3,25E+00 | 7,13E-02 | 3,38E-01 | Crls1         | 1,12 | No  |
| ENSMUSG00000027358 | -1,76E+00 | -0,668894353 | 1,93E+01 | 1,13E-05 | 3,76E-04 | Bmp2          | 0,29 | Yes |
| ENSMUSG00000027359 | -1,48E+00 | -2,289477248 | 2,27E+00 | 1,32E-01 | 4,56E-01 | Slc27a2       | 0,36 | No  |

|                    |           |              |          |          |          |               |      |     |
|--------------------|-----------|--------------|----------|----------|----------|---------------|------|-----|
| ENSMUSG00000027360 | -5,31E-01 | 0,070731001  | 3,34E+00 | 6,76E-02 | 3,28E-01 | Hdc           | 0,69 | No  |
| ENSMUSG00000027361 | -1,49E-01 | 4,56558915   | 3,52E+00 | 6,05E-02 | 3,05E-01 | Gabpb1        | 0,90 | No  |
| ENSMUSG00000027363 | 2,37E-02  | 7,239666449  | 1,57E-01 | 6,92E-01 | 9,00E-01 | Usp8          | 1,02 | No  |
| ENSMUSG00000027364 | 9,99E-02  | 3,783450753  | 1,14E+00 | 2,85E-01 | 5,82E-01 | Usp50         | 1,07 | No  |
| ENSMUSG00000027365 | 6,99E-03  | 7,097137564  | 1,34E-02 | 9,08E-01 | 1,00E+00 | Trpm7         | 1,00 | No  |
| ENSMUSG00000027366 | 5,68E-02  | 7,68904505   | 9,33E-01 | 3,34E-01 | 6,35E-01 | Sppl2a        | 1,04 | No  |
| ENSMUSG00000027367 | -2,60E-01 | 6,883970593  | 1,82E+01 | 1,98E-05 | 6,15E-04 | Stard7        | 0,83 | Yes |
| ENSMUSG00000027368 | -2,33E-01 | 0,621967028  | 9,94E-01 | 3,19E-01 | 6,19E-01 | Dusp2         | 0,85 | No  |
| ENSMUSG00000027371 | 5,95E-02  | 3,821231848  | 4,16E-01 | 5,19E-01 | 7,98E-01 | Fahd2a        | 1,04 | No  |
| ENSMUSG00000027374 | 1,57E-01  | 3,505673298  | 2,50E+00 | 1,14E-01 | 4,16E-01 | Mrps5         | 1,12 | No  |
| ENSMUSG00000027376 | -1,41E-01 | -0,50994938  | 1,75E-01 | 6,76E-01 | 8,91E-01 | Prom2         | 0,91 | No  |
| ENSMUSG00000027377 | -8,92E-01 | 0,715998142  | 1,63E+01 | 5,31E-05 | 1,43E-03 | Mall          | 0,54 | Yes |
| ENSMUSG00000027378 | 1,30E-01  | 1,990790649  | 7,36E-01 | 3,91E-01 | 6,91E-01 | Nphp1         | 1,09 | No  |
| ENSMUSG00000027379 | 2,36E-01  | 5,290195166  | 1,10E+01 | 8,96E-04 | 1,48E-02 | Bub1          | 1,18 | Yes |
| ENSMUSG00000027380 | 1,38E-01  | -1,205818281 | 9,05E-02 | 7,64E-01 | 9,39E-01 | Acox1         | 1,10 | No  |
| ENSMUSG00000027381 | 1,67E-01  | 6,497591718  | 7,11E+00 | 7,66E-03 | 7,66E-02 | Bcl2l11       | 1,12 | No  |
| ENSMUSG00000027384 | -2,38E-02 | 2,327561897  | 3,12E-02 | 8,60E-01 | 9,95E-01 | Ndufaf5       | 0,98 | No  |
| ENSMUSG00000027387 | 2,47E-01  | 1,652186108  | 2,27E+00 | 1,32E-01 | 4,56E-01 | Zc3h8         | 1,19 | No  |
| ENSMUSG00000027394 | 1,62E-01  | 4,402981134  | 3,94E+00 | 4,70E-02 | 2,60E-01 | Ttl           | 1,12 | No  |
| ENSMUSG00000027395 | 2,15E-01  | 4,349587151  | 6,70E+00 | 9,65E-03 | 9,08E-02 | Polr1b        | 1,16 | No  |
| ENSMUSG00000027397 | -1,93E-01 | 7,905162795  | 1,08E+01 | 9,89E-04 | 1,60E-02 | Slc20a1       | 0,87 | Yes |
| ENSMUSG00000027398 | -6,90E-01 | 4,943053069  | 7,95E+01 | 4,84E-19 | 1,04E-16 | Il1b          | 0,62 | Yes |
| ENSMUSG00000027399 | -6,55E-01 | 6,401777657  | 1,04E+02 | 2,30E-24 | 7,67E-22 | Il1a          | 0,64 | Yes |
| ENSMUSG00000027400 | -1,27E+00 | -2,65510207  | 1,54E+00 | 2,15E-01 | 5,50E-01 | Pdyn          | 0,42 | No  |
| ENSMUSG00000027401 | 1,87E+00  | -3,107639691 | 1,38E+00 | 2,40E-01 | 5,50E-01 | Tgm3          | 3,67 | No  |
| ENSMUSG00000027404 | 3,94E-02  | 7,025570686  | 4,22E-01 | 5,16E-01 | 7,97E-01 | Snrpb         | 1,03 | No  |
| ENSMUSG00000027405 | 1,63E-02  | 5,842317951  | 5,99E-02 | 8,07E-01 | 9,64E-01 | Nop56         | 1,01 | No  |
| ENSMUSG00000027406 | -6,72E-02 | 6,436188105  | 1,14E+00 | 2,86E-01 | 5,82E-01 | Idh3b         | 0,95 | No  |
| ENSMUSG00000027408 | -5,61E-01 | -0,344073936 | 2,43E+00 | 1,19E-01 | 4,30E-01 | Cpxm1         | 0,68 | No  |
| ENSMUSG00000027409 | 7,19E-01  | -2,033576791 | 8,37E-01 | 3,60E-01 | 6,62E-01 | 1700020A23Rik | 1,65 | No  |
| ENSMUSG00000027411 | -9,53E-02 | 5,543533114  | 1,91E+00 | 1,67E-01 | 5,20E-01 | Vps16         | 0,94 | No  |
| ENSMUSG00000027412 | -8,50E-01 | -1,070122133 | 4,16E+00 | 4,13E-02 | 2,41E-01 | Lpin3         | 0,55 | No  |

|                    |           |              |          |          |          |               |  |      |     |
|--------------------|-----------|--------------|----------|----------|----------|---------------|--|------|-----|
| ENSMUSG00000027416 | 1,82E+00  | -3,033667329 | 1,31E+00 | 2,52E-01 | 5,50E-01 | Otor          |  | 3,54 | No  |
| ENSMUSG00000027419 | -1,13E+00 | -2,929298189 | 7,47E-01 | 3,88E-01 | 6,88E-01 | Pcsk2         |  | 0,46 | No  |
| ENSMUSG00000027420 | 3,05E-01  | 1,536508754  | 2,86E+00 | 9,11E-02 | 3,82E-01 | Bfsp1         |  | 1,24 | No  |
| ENSMUSG00000027422 | 1,70E-02  | 8,11365715   | 8,56E-02 | 7,70E-01 | 9,42E-01 | Rrbp1         |  | 1,01 | No  |
| ENSMUSG00000027423 | 1,18E-01  | 8,458870361  | 4,22E+00 | 3,99E-02 | 2,37E-01 | Snx5          |  | 1,09 | No  |
| ENSMUSG00000027424 | 3,23E-01  | 3,315340132  | 9,93E+00 | 1,63E-03 | 2,38E-02 | Mgme1         |  | 1,25 | Yes |
| ENSMUSG00000027425 | 1,93E-01  | 5,515065206  | 7,84E+00 | 5,11E-03 | 5,67E-02 | Kat14         |  | 1,14 | No  |
| ENSMUSG00000027427 | -3,31E-02 | 4,881712713  | 1,89E-01 | 6,64E-01 | 8,84E-01 | Polr3f        |  | 0,98 | No  |
| ENSMUSG00000027428 | -2,44E-01 | 2,768284314  | 4,18E+00 | 4,09E-02 | 2,40E-01 | Rbbp9         |  | 0,84 | No  |
| ENSMUSG00000027429 | 7,51E-02  | 5,875858905  | 1,28E+00 | 2,59E-01 | 5,51E-01 | Sec23b        |  | 1,05 | No  |
| ENSMUSG00000027430 | 3,04E-01  | 1,395642369  | 2,72E+00 | 9,93E-02 | 3,92E-01 | Dtd1          |  | 1,23 | No  |
| ENSMUSG00000027433 | -6,59E-02 | 6,412208076  | 1,09E+00 | 2,97E-01 | 5,92E-01 | Xrn2          |  | 0,96 | No  |
| ENSMUSG00000027435 | 6,92E-02  | 8,469414508  | 1,44E+00 | 2,29E-01 | 5,50E-01 | Cd93          |  | 1,05 | No  |
| ENSMUSG00000027438 | 8,70E-03  | 1,811828177  | 3,08E-03 | 9,56E-01 | 1,00E+00 | Napb          |  | 1,01 | No  |
| ENSMUSG00000027439 | 6,25E-02  | 4,959440324  | 7,11E-01 | 3,99E-01 | 6,98E-01 | Gzf1          |  | 1,04 | No  |
| ENSMUSG00000027446 | -8,66E-01 | -2,770614961 | 4,10E-01 | 5,22E-01 | 8,00E-01 | 9230104L09Rik |  | 0,55 | No  |
| ENSMUSG00000027447 | -3,56E-01 | 11,38858294  | 4,07E+01 | 1,79E-10 | 1,63E-08 | Cst3          |  | 0,78 | Yes |
| ENSMUSG00000027452 | 3,63E-01  | 4,802256292  | 2,24E+01 | 2,22E-06 | 8,89E-05 | Acss1         |  | 1,29 | Yes |
| ENSMUSG00000027454 | 1,94E-01  | 2,535826061  | 2,28E+00 | 1,31E-01 | 4,56E-01 | Gins1         |  | 1,14 | No  |
| ENSMUSG00000027455 | -1,85E-01 | 4,955859525  | 6,24E+00 | 1,25E-02 | 1,10E-01 | Nsfl1c        |  | 0,88 | No  |
| ENSMUSG00000027456 | -1,15E-01 | 1,026333569  | 3,09E-01 | 5,78E-01 | 8,35E-01 | Sdcbp2        |  | 0,92 | No  |
| ENSMUSG00000027457 | 1,40E-01  | 1,956038599  | 8,31E-01 | 3,62E-01 | 6,63E-01 | Snph          |  | 1,10 | No  |
| ENSMUSG00000027459 | 3,69E-02  | 3,82376673   | 1,65E-01 | 6,85E-01 | 8,97E-01 | Fam110a       |  | 1,03 | No  |
| ENSMUSG00000027460 | -1,16E+00 | -1,711682783 | 2,63E+00 | 1,05E-01 | 3,97E-01 | Angpt4        |  | 0,45 | No  |
| ENSMUSG00000027463 | 7,56E-02  | 5,331296576  | 1,15E+00 | 2,84E-01 | 5,81E-01 | Slc52a3       |  | 1,05 | No  |
| ENSMUSG00000027465 | -3,94E-02 | 7,311085926  | 4,35E-01 | 5,10E-01 | 7,93E-01 | Tbc1d20       |  | 0,97 | No  |
| ENSMUSG00000027466 | 1,86E-02  | 6,886351778  | 9,25E-02 | 7,61E-01 | 9,37E-01 | Rbck1         |  | 1,01 | No  |
| ENSMUSG00000027469 | 1,94E-01  | 6,087311014  | 9,00E+00 | 2,70E-03 | 3,53E-02 | Tpx2          |  | 1,14 | Yes |
| ENSMUSG00000027470 | -6,84E-02 | -2,711771061 | 4,27E-03 | 9,48E-01 | 1,00E+00 | Mylk2         |  | 0,95 | No  |
| ENSMUSG00000027472 | 2,22E-02  | 4,603566172  | 8,16E-02 | 7,75E-01 | 9,45E-01 | Pdrg1         |  | 1,02 | No  |
| ENSMUSG00000027474 | 1,52E-01  | -1,740955407 | 6,98E-02 | 7,92E-01 | 9,55E-01 | Ccm2l         |  | 1,11 | No  |
| ENSMUSG00000027475 | -7,42E-02 | 7,504206157  | 1,57E+00 | 2,10E-01 | 5,50E-01 | Kif3b         |  | 0,95 | No  |

|                    |           |              |          |          |          |          |      |     |
|--------------------|-----------|--------------|----------|----------|----------|----------|------|-----|
| ENSMUSG00000027478 | 3,92E-01  | 1,723294768  | 5,50E+00 | 1,90E-02 | 1,46E-01 | Dnmt3b   | 1,31 | No  |
| ENSMUSG00000027479 | -6,15E-02 | 7,663190126  | 1,09E+00 | 2,96E-01 | 5,92E-01 | Mapre1   | 0,96 | No  |
| ENSMUSG00000027487 | 4,98E-02  | 2,532641267  | 1,60E-01 | 6,90E-01 | 8,99E-01 | Cdk5rap1 | 1,04 | No  |
| ENSMUSG00000027488 | 4,65E-02  | 1,369285458  | 6,33E-02 | 8,01E-01 | 9,61E-01 | Snta1    | 1,03 | No  |
| ENSMUSG00000027489 | 2,73E-01  | -0,14617134  | 7,01E-01 | 4,02E-01 | 7,01E-01 | Necab3   | 1,21 | No  |
| ENSMUSG00000027490 | 1,99E-01  | 5,462331221  | 8,20E+00 | 4,19E-03 | 4,90E-02 | E2f1     | 1,15 | Yes |
| ENSMUSG00000027495 | -2,05E-01 | 4,370280718  | 6,23E+00 | 1,26E-02 | 1,11E-01 | Fam210b  | 0,87 | No  |
| ENSMUSG00000027496 | 1,36E-01  | 5,116270477  | 3,47E+00 | 6,23E-02 | 3,11E-01 | Aurka    | 1,10 | No  |
| ENSMUSG00000027498 | 9,18E-02  | 5,079263256  | 1,58E+00 | 2,08E-01 | 5,50E-01 | Cstf1    | 1,07 | No  |
| ENSMUSG00000027499 | -2,66E+00 | -2,831990267 | 2,82E+00 | 9,31E-02 | 3,83E-01 | Pkia     | 0,16 | No  |
| ENSMUSG00000027500 | 1,85E+00  | -3,107657832 | 1,35E+00 | 2,46E-01 | 5,50E-01 | Stmn2    | 3,61 | No  |
| ENSMUSG00000027502 | -3,30E-02 | 6,790452229  | 2,88E-01 | 5,91E-01 | 8,42E-01 | Rtfdc1   | 0,98 | No  |
| ENSMUSG00000027505 | -2,69E-01 | 1,47807563   | 2,10E+00 | 1,47E-01 | 4,85E-01 | Fam209   | 0,83 | No  |
| ENSMUSG00000027506 | 6,59E-02  | 6,516551332  | 1,10E+00 | 2,94E-01 | 5,89E-01 | Tpd52    | 1,05 | No  |
| ENSMUSG00000027508 | 3,32E-01  | 6,231582342  | 2,65E+01 | 2,65E-07 | 1,34E-05 | Pag1     | 1,26 | Yes |
| ENSMUSG00000027509 | -3,53E-02 | 4,444481125  | 1,90E-01 | 6,63E-01 | 8,83E-01 | Rae1     | 0,98 | No  |
| ENSMUSG00000027510 | -2,46E-01 | 3,680099112  | 6,59E+00 | 1,03E-02 | 9,52E-02 | Rbm38    | 0,84 | No  |
| ENSMUSG00000027514 | -3,01E-02 | 4,802070914  | 1,56E-01 | 6,93E-01 | 9,01E-01 | Zbp1     | 0,98 | No  |
| ENSMUSG00000027519 | 1,61E-02  | 6,061827058  | 6,19E-02 | 8,04E-01 | 9,62E-01 | Rab22a   | 1,01 | No  |
| ENSMUSG00000027520 | -5,88E-02 | -3,033616507 | 1,62E-03 | 9,68E-01 | 1,00E+00 | Zdbf2    | 0,96 | No  |
| ENSMUSG00000027522 | 9,92E-03  | 6,494722889  | 2,52E-02 | 8,74E-01 | 1,00E+00 | Stx16    | 1,01 | No  |
| ENSMUSG00000027523 | -6,14E-02 | 8,035653923  | 1,12E+00 | 2,91E-01 | 5,86E-01 | Gnas     | 0,96 | No  |
| ENSMUSG00000027524 | -2,70E+00 | -2,963266517 | 2,89E+00 | 8,90E-02 | 3,79E-01 | Edn3     | 0,15 | No  |
| ENSMUSG00000027525 | -4,61E-02 | -2,832015797 | 1,00E-03 | 9,75E-01 | 1,00E+00 | Phactr3  | 0,97 | No  |
| ENSMUSG00000027528 | -6,80E-01 | -2,998019532 | 1,86E-01 | 6,66E-01 | 8,86E-01 | Fabp9    | 0,62 | No  |
| ENSMUSG00000027530 | -5,28E-02 | -2,711731759 | 1,90E-03 | 9,65E-01 | 1,00E+00 | Fabp12   | 0,96 | No  |
| ENSMUSG00000027531 | 3,48E-02  | 5,719811043  | 2,67E-01 | 6,05E-01 | 8,49E-01 | Impa1    | 1,02 | No  |
| ENSMUSG00000027533 | -2,11E-01 | 8,036630699  | 1,32E+01 | 2,78E-04 | 5,70E-03 | Fabp5    | 0,86 | Yes |
| ENSMUSG00000027534 | -1,38E-01 | 2,645132053  | 1,27E+00 | 2,59E-01 | 5,52E-01 | Snx16    | 0,91 | No  |
| ENSMUSG00000027536 | -4,51E-01 | 1,367309193  | 6,37E+00 | 1,16E-02 | 1,04E-01 | Chmp4c   | 0,73 | No  |
| ENSMUSG00000027540 | -1,26E-02 | 9,056377253  | 4,89E-02 | 8,25E-01 | 9,74E-01 | Ptpn1    | 0,99 | No  |
| ENSMUSG00000027544 | 1,83E-01  | 6,582212867  | 8,61E+00 | 3,34E-03 | 4,15E-02 | Nfatc2   | 1,14 | Yes |

|                    |           |              |           |          |          |          |      |     |
|--------------------|-----------|--------------|-----------|----------|----------|----------|------|-----|
| ENSMUSG00000027546 | 8,06E-02  | 0,906314606  | 1,36E-01  | 7,12E-01 | 9,11E-01 | Atp9a    | 1,06 | No  |
| ENSMUSG00000027547 | 3,14E-02  | -3,107617333 | -7,69E-10 | 1,00E+00 | 1,00E+00 | Sall4    | 1,02 | No  |
| ENSMUSG00000027550 | 6,19E-02  | 5,16656317   | 7,43E-01  | 3,89E-01 | 6,89E-01 | Lrrcc1   | 1,04 | No  |
| ENSMUSG00000027551 | 7,95E-02  | 4,198844457  | 8,65E-01  | 3,52E-01 | 6,53E-01 | Zfp64    | 1,06 | No  |
| ENSMUSG00000027552 | -1,12E-01 | 3,923647143  | 1,55E+00  | 2,13E-01 | 5,50E-01 | E2f5     | 0,93 | No  |
| ENSMUSG00000027555 | -8,59E-02 | 4,898691282  | 1,32E+00  | 2,51E-01 | 5,50E-01 | Car13    | 0,94 | No  |
| ENSMUSG00000027559 | 7,07E-01  | -2,963242697 | 2,70E-01  | 6,03E-01 | 8,48E-01 | Car3     | 1,63 | No  |
| ENSMUSG00000027562 | -1,18E+00 | 6,163103869  | 3,28E+02  | 2,88E-73 | 4,32E-69 | Car2     | 0,44 | Yes |
| ENSMUSG00000027566 | -1,18E-01 | 6,729144603  | 3,68E+00  | 5,51E-02 | 2,88E-01 | Psma7    | 0,92 | No  |
| ENSMUSG00000027568 | -1,89E+00 | -3,1076441   | 1,42E+00  | 2,33E-01 | 5,50E-01 | Ntsr1    | 0,27 | No  |
| ENSMUSG00000027569 | 5,02E-02  | 4,463897917  | 3,83E-01  | 5,36E-01 | 8,08E-01 | Mrgbp    | 1,04 | No  |
| ENSMUSG00000027570 | -2,00E-01 | -0,778002108 | 2,63E-01  | 6,08E-01 | 8,51E-01 | Col9a3   | 0,87 | No  |
| ENSMUSG00000027573 | 9,58E-02  | 5,342876936  | 1,85E+00  | 1,74E-01 | 5,32E-01 | Gid8     | 1,07 | No  |
| ENSMUSG00000027574 | -1,89E+00 | -3,1076441   | 1,42E+00  | 2,33E-01 | 5,50E-01 | Nkain4   | 0,27 | No  |
| ENSMUSG00000027575 | 1,25E-01  | 5,541344512  | 3,31E+00  | 6,87E-02 | 3,30E-01 | Arfgap1  | 1,09 | No  |
| ENSMUSG00000027577 | -2,70E+00 | -2,896072657 | 2,90E+00  | 8,86E-02 | 3,79E-01 | Chrna4   | 0,15 | No  |
| ENSMUSG00000027579 | -1,08E+00 | 2,425476874  | 6,97E+01  | 6,76E-17 | 1,21E-14 | Srms     | 0,47 | Yes |
| ENSMUSG00000027580 | -5,50E-01 | 8,128323802  | 8,96E+01  | 2,86E-21 | 7,32E-19 | Helz2    | 0,68 | Yes |
| ENSMUSG00000027581 | -1,74E+00 | -2,71166179  | 2,10E+00  | 1,47E-01 | 4,85E-01 | Stmn3    | 0,30 | No  |
| ENSMUSG00000027582 | -2,11E-01 | 5,568801895  | 9,63E+00  | 1,91E-03 | 2,70E-02 | Zgpat    | 0,86 | Yes |
| ENSMUSG00000027583 | -1,10E-01 | 5,622073424  | 2,67E+00  | 1,02E-01 | 3,94E-01 | Zbtb46   | 0,93 | No  |
| ENSMUSG00000027584 | 1,81E-01  | -2,226292246 | 4,88E-02  | 8,25E-01 | 9,74E-01 | Oprl1    | 1,13 | No  |
| ENSMUSG00000027589 | -5,18E-02 | 4,570571984  | 4,31E-01  | 5,12E-01 | 7,94E-01 | Pcmdt2   | 0,96 | No  |
| ENSMUSG00000027593 | -5,37E-02 | 7,18532229   | 7,98E-01  | 3,72E-01 | 6,73E-01 | Raly     | 0,96 | No  |
| ENSMUSG00000027596 | -1,94E-02 | 2,987739898  | 2,94E-02  | 8,64E-01 | 9,97E-01 | a        | 0,99 | No  |
| ENSMUSG00000027597 | 9,66E-02  | 4,529427181  | 1,46E+00  | 2,28E-01 | 5,50E-01 | Ahcy     | 1,07 | No  |
| ENSMUSG00000027598 | -1,81E-01 | 7,025267356  | 8,91E+00  | 2,84E-03 | 3,68E-02 | Itch     | 0,88 | Yes |
| ENSMUSG00000027599 | 8,53E-02  | 5,239497173  | 1,42E+00  | 2,33E-01 | 5,50E-01 | Armc1    | 1,06 | No  |
| ENSMUSG00000027601 | 1,37E-01  | 4,118813283  | 2,53E+00  | 1,12E-01 | 4,11E-01 | Mtfr1    | 1,10 | No  |
| ENSMUSG00000027602 | -1,06E-01 | 3,931948129  | 1,36E+00  | 2,43E-01 | 5,50E-01 | Map1lc3a | 0,93 | No  |
| ENSMUSG00000027603 | 2,11E-02  | -0,002490999 | 5,15E-03  | 9,43E-01 | 1,00E+00 | Ggt7     | 1,01 | No  |
| ENSMUSG00000027605 | 6,92E-02  | 3,776564005  | 5,45E-01  | 4,61E-01 | 7,49E-01 | Acsc2    | 1,05 | No  |

|                    |           |              |           |          |          |               |      |     |
|--------------------|-----------|--------------|-----------|----------|----------|---------------|------|-----|
| ENSMUSG00000027610 | 1,28E-01  | 4,633952636  | 2,60E+00  | 1,07E-01 | 4,00E-01 | Gss           | 1,09 | No  |
| ENSMUSG00000027611 | 1,26E-01  | 5,056812791  | 2,94E+00  | 8,64E-02 | 3,78E-01 | Procr         | 1,09 | No  |
| ENSMUSG00000027612 | -3,86E-02 | 2,930396802  | 1,13E-01  | 7,37E-01 | 9,25E-01 | Mmp24         | 0,97 | No  |
| ENSMUSG00000027613 | -1,11E-01 | 6,448881273  | 3,09E+00  | 7,88E-02 | 3,59E-01 | Eif6          | 0,93 | No  |
| ENSMUSG00000027615 | 1,67E-01  | 6,322438266  | 6,90E+00  | 8,62E-03 | 8,37E-02 | Hps3          | 1,12 | No  |
| ENSMUSG00000027618 | -2,61E-02 | 4,898534028  | 1,20E-01  | 7,29E-01 | 9,20E-01 | Nfs1          | 0,98 | No  |
| ENSMUSG00000027620 | -1,69E-01 | 8,058166036  | 8,47E+00  | 3,62E-03 | 4,40E-02 | Rbm39         | 0,89 | Yes |
| ENSMUSG00000027624 | -8,68E-03 | 4,104287888  | 9,64E-03  | 9,22E-01 | 1,00E+00 | Epb41l1       | 0,99 | No  |
| ENSMUSG00000027628 | 1,61E-01  | 4,749164593  | 4,37E+00  | 3,66E-02 | 2,27E-01 | Aar2          | 1,12 | No  |
| ENSMUSG00000027630 | 8,75E-02  | 6,960180188  | 2,06E+00  | 1,51E-01 | 4,93E-01 | Tbl1xr1       | 1,06 | No  |
| ENSMUSG00000027634 | 4,16E-02  | 5,043724051  | 3,20E-01  | 5,71E-01 | 8,32E-01 | Ndr3          | 1,03 | No  |
| ENSMUSG00000027635 | 1,17E-02  | 3,786760675  | 1,60E-02  | 8,99E-01 | 1,00E+00 | Dsn1          | 1,01 | No  |
| ENSMUSG00000027636 | 2,06E-02  | 5,084033157  | 7,84E-02  | 7,79E-01 | 9,48E-01 | Sla2          | 1,01 | No  |
| ENSMUSG00000027637 | 3,22E-02  | 6,150556543  | 2,48E-01  | 6,19E-01 | 8,56E-01 | 1110008F13Rik | 1,02 | No  |
| ENSMUSG00000027639 | -2,51E-01 | 8,793331425  | 1,94E+01  | 1,08E-05 | 3,60E-04 | Samhd1        | 0,84 | Yes |
| ENSMUSG00000027641 | 1,19E-01  | 5,61234485   | 3,06E+00  | 8,03E-02 | 3,63E-01 | Rbl1          | 1,09 | No  |
| ENSMUSG00000027642 | 1,08E-01  | 7,936553025  | 3,44E+00  | 6,38E-02 | 3,16E-01 | Rpn2          | 1,08 | No  |
| ENSMUSG00000027646 | -2,77E-01 | 4,832795469  | 1,34E+01  | 2,56E-04 | 5,34E-03 | Src           | 0,83 | Yes |
| ENSMUSG00000027649 | -1,24E-02 | 4,485512916  | 2,35E-02  | 8,78E-01 | 1,00E+00 | Ctnnbl1       | 0,99 | No  |
| ENSMUSG00000027650 | 4,23E-02  | 4,941878977  | 3,24E-01  | 5,69E-01 | 8,30E-01 | Tti1          | 1,03 | No  |
| ENSMUSG00000027651 | 5,45E-02  | 5,014605859  | 5,47E-01  | 4,60E-01 | 7,49E-01 | Rprd1b        | 1,04 | No  |
| ENSMUSG00000027652 | -7,08E-02 | 6,873001848  | 1,34E+00  | 2,47E-01 | 5,50E-01 | Ralgapb       | 0,95 | No  |
| ENSMUSG00000027654 | 3,71E-01  | 3,361755987  | 1,31E+01  | 3,00E-04 | 6,06E-03 | Fam83d        | 1,29 | Yes |
| ENSMUSG00000027655 | 5,80E-02  | 4,286862809  | 4,79E-01  | 4,89E-01 | 7,76E-01 | Dhx35         | 1,04 | No  |
| ENSMUSG00000027656 | -1,90E+00 | -2,311094963 | 4,23E+00  | 3,97E-02 | 2,36E-01 | Wisp2         | 0,27 | No  |
| ENSMUSG00000027660 | -2,17E-01 | 7,244499091  | 1,31E+01  | 2,94E-04 | 5,97E-03 | Skil          | 0,86 | Yes |
| ENSMUSG00000027661 | 3,14E-02  | -3,107617333 | -7,69E-10 | 1,00E+00 | 1,00E+00 | Slc2a10       | 1,02 | No  |
| ENSMUSG00000027663 | 2,42E-01  | 6,196172328  | 1,41E+01  | 1,78E-04 | 3,94E-03 | Zmat3         | 1,18 | Yes |
| ENSMUSG00000027665 | 6,08E-02  | 6,019126367  | 8,70E-01  | 3,51E-01 | 6,52E-01 | Pik3ca        | 1,04 | No  |
| ENSMUSG00000027667 | 9,12E-03  | 4,754163379  | 1,40E-02  | 9,06E-01 | 1,00E+00 | Zfp639        | 1,01 | No  |
| ENSMUSG00000027668 | 3,58E-03  | 5,456142721  | 2,65E-03  | 9,59E-01 | 1,00E+00 | Mfn1          | 1,00 | No  |
| ENSMUSG00000027669 | -5,31E-01 | 7,031299057  | 7,73E+01  | 1,49E-18 | 3,03E-16 | Gnb4          | 0,69 | Yes |



|                    |           |              |           |          |          |               |      |     |
|--------------------|-----------|--------------|-----------|----------|----------|---------------|------|-----|
| ENSMUSG00000027670 | 7,64E-01  | 3,992389014  | 7,12E+01  | 3,28E-17 | 6,22E-15 | Ocstamp       | 1,70 | Yes |
| ENSMUSG00000027671 | -8,73E-03 | 5,009185218  | 1,38E-02  | 9,07E-01 | 1,00E+00 | Actl6a        | 0,99 | No  |
| ENSMUSG00000027673 | 5,07E-03  | 5,047412995  | 4,73E-03  | 9,45E-01 | 1,00E+00 | Ndufb5        | 1,00 | No  |
| ENSMUSG00000027674 | 1,87E+00  | -3,107639691 | 1,38E+00  | 2,40E-01 | 5,50E-01 | Pex5l         | 3,67 | No  |
| ENSMUSG00000027676 | -2,58E-01 | 1,651845318  | 2,32E+00  | 1,28E-01 | 4,49E-01 | Ccdc39        | 0,84 | No  |
| ENSMUSG00000027677 | -6,20E-02 | 6,072643894  | 9,14E-01  | 3,39E-01 | 6,40E-01 | Ttc14         | 0,96 | No  |
| ENSMUSG00000027678 | -1,55E-01 | 7,514707163  | 6,89E+00  | 8,67E-03 | 8,40E-02 | Ncoa3         | 0,90 | No  |
| ENSMUSG00000027679 | 9,93E-02  | 2,488303927  | 5,81E-01  | 4,46E-01 | 7,37E-01 | Dnajc19       | 1,07 | No  |
| ENSMUSG00000027680 | -1,42E-01 | 5,997479882  | 4,70E+00  | 3,02E-02 | 2,00E-01 | Fxr1          | 0,91 | No  |
| ENSMUSG00000027684 | 2,60E+00  | -2,963258458 | 2,63E+00  | 1,05E-01 | 3,97E-01 | Mecom         | 6,08 | No  |
| ENSMUSG00000027690 | -5,55E-01 | -2,770636996 | 2,41E-01  | 6,23E-01 | 8,58E-01 | Slc2a2        | 0,68 | No  |
| ENSMUSG00000027692 | -8,90E-01 | 1,592646331  | 2,98E+01  | 4,86E-08 | 2,90E-06 | Tnik          | 0,54 | Yes |
| ENSMUSG00000027694 | -8,45E-02 | 5,229782324  | 1,38E+00  | 2,40E-01 | 5,50E-01 | Gm8325        | 0,94 | No  |
| ENSMUSG00000027695 | 9,33E-02  | 4,542438186  | 1,36E+00  | 2,43E-01 | 5,50E-01 | Pld1          | 1,07 | No  |
| ENSMUSG00000027698 | 1,10E-01  | 7,42780233   | 3,41E+00  | 6,48E-02 | 3,19E-01 | Nceh1         | 1,08 | No  |
| ENSMUSG00000027699 | 1,32E-01  | 4,421011922  | 2,64E+00  | 1,04E-01 | 3,97E-01 | Ect2          | 1,10 | No  |
| ENSMUSG00000027702 | 4,86E-01  | -2,20582768  | 3,20E-01  | 5,71E-01 | 8,32E-01 | Lrrc34        | 1,40 | No  |
| ENSMUSG00000027703 | 5,97E-03  | -3,1461183   | -3,40E-10 | 1,00E+00 | 1,00E+00 | Lrriq4        | 1,00 | No  |
| ENSMUSG00000027706 | 6,15E-02  | 6,180244745  | 9,10E-01  | 3,40E-01 | 6,41E-01 | Sec62         | 1,04 | No  |
| ENSMUSG00000027708 | -9,50E-02 | 4,97715379   | 1,65E+00  | 1,99E-01 | 5,50E-01 | Dcun1d1       | 0,94 | No  |
| ENSMUSG00000027709 | 1,73E-01  | 3,925033496  | 3,70E+00  | 5,45E-02 | 2,86E-01 | Mccc1         | 1,13 | No  |
| ENSMUSG00000027710 | -1,22E-02 | 4,539546941  | 2,33E-02  | 8,79E-01 | 1,00E+00 | Acad9         | 0,99 | No  |
| ENSMUSG00000027712 | 3,95E-02  | 7,724869342  | 4,53E-01  | 5,01E-01 | 7,86E-01 | Anxa5         | 1,03 | No  |
| ENSMUSG00000027713 | 1,54E-01  | -1,344433674 | 8,99E-02  | 7,64E-01 | 9,39E-01 | 1810062G17Rik | 1,11 | No  |
| ENSMUSG00000027714 | 7,10E-02  | 4,97599114   | 9,09E-01  | 3,40E-01 | 6,41E-01 | Exosc9        | 1,05 | No  |
| ENSMUSG00000027715 | 2,32E-01  | 6,423407996  | 1,35E+01  | 2,44E-04 | 5,14E-03 | Ccna2         | 1,17 | Yes |
| ENSMUSG00000027720 | -4,13E-01 | 0,144209802  | 2,02E+00  | 1,55E-01 | 4,99E-01 | Il2           | 0,75 | No  |
| ENSMUSG00000027722 | 2,60E-02  | 4,393205677  | 1,01E-01  | 7,50E-01 | 9,32E-01 | Spata5        | 1,02 | No  |
| ENSMUSG00000027737 | 6,97E-02  | 8,177157645  | 1,44E+00  | 2,30E-01 | 5,50E-01 | Slc7a11       | 1,05 | No  |
| ENSMUSG00000027739 | 2,36E-01  | 3,899049129  | 6,72E+00  | 9,52E-03 | 8,99E-02 | Rab33b        | 1,18 | No  |
| ENSMUSG00000027742 | 5,12E-02  | 4,561267877  | 4,18E-01  | 5,18E-01 | 7,98E-01 | Cog6          | 1,04 | No  |
| ENSMUSG00000027744 | -8,32E-01 | -2,896126913 | 3,79E-01  | 5,38E-01 | 8,09E-01 | Stoml3        | 0,56 | No  |

|                    |           |              |           |          |          |               |      |     |
|--------------------|-----------|--------------|-----------|----------|----------|---------------|------|-----|
| ENSMUSG00000027746 | 3,64E-02  | 6,129224538  | 3,15E-01  | 5,75E-01 | 8,34E-01 | Ufm1          | 1,03 | No  |
| ENSMUSG00000027748 | 3,82E-01  | -1,051942017 | 8,38E-01  | 3,60E-01 | 6,61E-01 | Trpc4         | 1,30 | No  |
| ENSMUSG00000027750 | 6,88E-01  | -0,755698986 | 3,56E+00  | 5,91E-02 | 3,01E-01 | Postn         | 1,61 | No  |
| ENSMUSG00000027751 | -4,63E-02 | 6,089018252  | 5,11E-01  | 4,75E-01 | 7,63E-01 | Supt20        | 0,97 | No  |
| ENSMUSG00000027752 | 3,16E-02  | 4,357838462  | 1,48E-01  | 7,01E-01 | 9,05E-01 | Exosc8        | 1,02 | No  |
| ENSMUSG00000027763 | 2,48E-01  | 9,823875445  | 1,93E+01  | 1,11E-05 | 3,69E-04 | Mbnl1         | 1,19 | Yes |
| ENSMUSG00000027765 | 2,56E-01  | 4,542371536  | 1,02E+01  | 1,38E-03 | 2,09E-02 | P2ry1         | 1,19 | Yes |
| ENSMUSG00000027770 | -2,87E-02 | 5,477233484  | 1,73E-01  | 6,78E-01 | 8,92E-01 | Dhx36         | 0,98 | No  |
| ENSMUSG00000027774 | 1,78E-02  | 5,496218566  | 6,64E-02  | 7,97E-01 | 9,58E-01 | Gfm1          | 1,01 | No  |
| ENSMUSG00000027775 | 9,54E-02  | 7,311685828  | 2,54E+00  | 1,11E-01 | 4,08E-01 | Mfsd1         | 1,07 | No  |
| ENSMUSG00000027776 | -7,57E-01 | -2,497560684 | 6,43E-01  | 4,23E-01 | 7,18E-01 | Il12a         | 0,59 | No  |
| ENSMUSG00000027777 | 1,27E-01  | -1,436619819 | 5,99E-02  | 8,07E-01 | 9,64E-01 | Schip1        | 1,09 | No  |
| ENSMUSG00000027778 | 9,71E-03  | 3,940215648  | 1,18E-02  | 9,13E-01 | 1,00E+00 | lft80         | 1,01 | No  |
| ENSMUSG00000027782 | -1,67E-01 | 6,972575875  | 7,48E+00  | 6,24E-03 | 6,61E-02 | Kpna4         | 0,89 | No  |
| ENSMUSG00000027784 | 1,21E-02  | 0,742587538  | 2,94E-03  | 9,57E-01 | 1,00E+00 | Ppm1l         | 1,01 | No  |
| ENSMUSG00000027787 | 1,98E-02  | 4,548242545  | 6,08E-02  | 8,05E-01 | 9,63E-01 | Nmd3          | 1,01 | No  |
| ENSMUSG00000027794 | -3,83E-02 | -3,107651936 | -7,91E-11 | 1,00E+00 | 1,00E+00 | Sohlh2        | 0,97 | No  |
| ENSMUSG00000027796 | 1,23E+00  | -2,831989638 | 9,43E-01  | 3,31E-01 | 6,32E-01 | Smad9         | 2,35 | No  |
| ENSMUSG00000027797 | -1,18E+00 | -2,333196713 | 1,79E+00  | 1,81E-01 | 5,43E-01 | Dclk1         | 0,44 | No  |
| ENSMUSG00000027799 | -1,38E+00 | -2,770611757 | 1,20E+00  | 2,74E-01 | 5,70E-01 | Nbea          | 0,38 | No  |
| ENSMUSG00000027800 | -4,33E-01 | -2,31111303  | 1,91E-01  | 6,62E-01 | 8,83E-01 | Tm4sf1        | 0,74 | No  |
| ENSMUSG00000027803 | 7,17E-01  | -1,998118265 | 9,17E-01  | 3,38E-01 | 6,39E-01 | Wwtr1         | 1,64 | No  |
| ENSMUSG00000027804 | -1,50E-01 | 4,778955395  | 3,83E+00  | 5,04E-02 | 2,72E-01 | Ppid          | 0,90 | No  |
| ENSMUSG00000027805 | -5,72E-01 | 1,383121305  | 9,98E+00  | 1,58E-03 | 2,32E-02 | Pfn2          | 0,67 | Yes |
| ENSMUSG00000027806 | 1,33E-01  | 5,674448674  | 3,86E+00  | 4,94E-02 | 2,68E-01 | Tsc22d2       | 1,10 | No  |
| ENSMUSG00000027808 | 8,56E-02  | 9,180061038  | 2,27E+00  | 1,32E-01 | 4,56E-01 | Serp1         | 1,06 | No  |
| ENSMUSG00000027809 | -1,08E-01 | 5,552365579  | 2,50E+00  | 1,14E-01 | 4,17E-01 | Etfdh         | 0,93 | No  |
| ENSMUSG00000027810 | 3,81E-02  | 5,445547218  | 2,99E-01  | 5,84E-01 | 8,38E-01 | Eif2a         | 1,03 | No  |
| ENSMUSG00000027811 | 1,17E-01  | 3,61773273   | 1,46E+00  | 2,26E-01 | 5,50E-01 | 4930579G24Rik | 1,08 | No  |
| ENSMUSG00000027820 | 3,14E-02  | -3,107617333 | -7,69E-10 | 1,00E+00 | 1,00E+00 | Mme           | 1,02 | No  |
| ENSMUSG00000027822 | -1,66E-01 | 5,772656948  | 6,27E+00  | 1,23E-02 | 1,09E-01 | Slc33a1       | 0,89 | No  |
| ENSMUSG00000027823 | -4,75E-02 | 5,496663382  | 4,72E-01  | 4,92E-01 | 7,78E-01 | Gmps          | 0,97 | No  |

|                    |           |              |          |          |          |          |      |     |
|--------------------|-----------|--------------|----------|----------|----------|----------|------|-----|
| ENSMUSG00000027824 | -5,87E-02 | -2,896151655 | 1,54E-03 | 9,69E-01 | 1,00E+00 | Vmn2r1   | 0,96 | No  |
| ENSMUSG00000027827 | 2,01E-01  | -0,160723665 | 3,82E-01 | 5,36E-01 | 8,08E-01 | Kcnab1   | 1,15 | No  |
| ENSMUSG00000027828 | 8,61E-02  | 8,60851601   | 2,26E+00 | 1,33E-01 | 4,59E-01 | Ssr3     | 1,06 | No  |
| ENSMUSG00000027829 | -4,05E-02 | 7,636548004  | 4,72E-01 | 4,92E-01 | 7,78E-01 | Ccn1     | 0,97 | No  |
| ENSMUSG00000027831 | 6,12E-01  | -2,4729761   | 5,28E-01 | 4,67E-01 | 7,56E-01 | Veph1    | 1,53 | No  |
| ENSMUSG00000027832 | -4,47E-01 | 6,394853753  | 4,86E+01 | 3,12E-12 | 3,56E-10 | Ptx3     | 0,73 | Yes |
| ENSMUSG00000027833 | 8,24E-01  | -2,574242326 | 5,91E-01 | 4,42E-01 | 7,34E-01 | Shox2    | 1,77 | No  |
| ENSMUSG00000027834 | -3,28E-01 | -0,655225647 | 7,62E-01 | 3,83E-01 | 6,84E-01 | Serpini1 | 0,80 | No  |
| ENSMUSG00000027835 | 6,69E-03  | 4,575760519  | 7,04E-03 | 9,33E-01 | 1,00E+00 | Pdcd10   | 1,00 | No  |
| ENSMUSG00000027840 | 2,29E-01  | -0,088992726 | 5,79E-01 | 4,47E-01 | 7,37E-01 | Wnt2b    | 1,17 | No  |
| ENSMUSG00000027843 | 1,84E-01  | 4,849891678  | 5,79E+00 | 1,61E-02 | 1,32E-01 | Ptpn22   | 1,14 | No  |
| ENSMUSG00000027845 | 1,66E-01  | 4,827579373  | 4,77E+00 | 2,89E-02 | 1,93E-01 | Dclre1b  | 1,12 | No  |
| ENSMUSG00000027848 | -3,17E-01 | 0,37219032   | 1,68E+00 | 1,95E-01 | 5,50E-01 | Olfml3   | 0,80 | No  |
| ENSMUSG00000027849 | -3,85E-02 | 3,023396011  | 1,24E-01 | 7,25E-01 | 9,18E-01 | Syt6     | 0,97 | No  |
| ENSMUSG00000027852 | 6,85E-02  | 7,37740752   | 1,32E+00 | 2,50E-01 | 5,50E-01 | Nras     | 1,05 | No  |
| ENSMUSG00000027854 | 1,18E-01  | 5,495053473  | 2,92E+00 | 8,75E-02 | 3,78E-01 | Sike1    | 1,09 | No  |
| ENSMUSG00000027857 | 8,17E-02  | -0,770512854 | 4,58E-02 | 8,31E-01 | 9,77E-01 | Tshb     | 1,06 | No  |
| ENSMUSG00000027858 | -1,60E-01 | 4,133207124  | 3,49E+00 | 6,17E-02 | 3,09E-01 | Tspan2   | 0,89 | No  |
| ENSMUSG00000027860 | 3,39E-01  | -1,522605679 | 4,00E-01 | 5,27E-01 | 8,04E-01 | Vangl1   | 1,27 | No  |
| ENSMUSG00000027863 | 8,38E-02  | 0,699480122  | 1,31E-01 | 7,18E-01 | 9,14E-01 | Cd2      | 1,06 | No  |
| ENSMUSG00000027864 | 1,37E-01  | 4,429207865  | 2,80E+00 | 9,43E-02 | 3,84E-01 | Ptgrn    | 1,10 | No  |
| ENSMUSG00000027865 | 2,05E-01  | 5,120870611  | 7,92E+00 | 4,89E-03 | 5,51E-02 | Gdap2    | 1,15 | No  |
| ENSMUSG00000027867 | 3,76E-01  | -0,002528603 | 1,59E+00 | 2,07E-01 | 5,50E-01 | Spag17   | 1,30 | No  |
| ENSMUSG00000027868 | -9,71E-01 | -2,35552255  | 1,14E+00 | 2,85E-01 | 5,82E-01 | Tbx15    | 0,51 | No  |
| ENSMUSG00000027875 | -1,87E+00 | -3,107637761 | 1,39E+00 | 2,38E-01 | 5,50E-01 | Hmgcs2   | 0,27 | No  |
| ENSMUSG00000027876 | -1,87E+00 | -3,107637761 | 1,39E+00 | 2,38E-01 | 5,50E-01 | Reg4     | 0,27 | No  |
| ENSMUSG00000027878 | -1,38E-01 | 8,555904244  | 5,82E+00 | 1,59E-02 | 1,31E-01 | Notch2   | 0,91 | No  |
| ENSMUSG00000027879 | 1,76E-02  | 5,81206191   | 6,93E-02 | 7,92E-01 | 9,55E-01 | Sec22b   | 1,01 | No  |
| ENSMUSG00000027880 | -1,86E+00 | -2,963227946 | 1,40E+00 | 2,36E-01 | 5,50E-01 | Slc25a54 | 0,28 | No  |
| ENSMUSG00000027881 | -1,24E-01 | 7,610644241  | 4,42E+00 | 3,55E-02 | 2,23E-01 | Prpf38b  | 0,92 | No  |
| ENSMUSG00000027882 | -2,29E-01 | 5,712791223  | 1,16E+01 | 6,45E-04 | 1,13E-02 | Stxbp3   | 0,85 | Yes |
| ENSMUSG00000027883 | 2,97E-01  | 4,486127121  | 1,34E+01 | 2,58E-04 | 5,36E-03 | Gpsm2    | 1,23 | Yes |

|                    |           |              |           |          |          |               |      |     |
|--------------------|-----------|--------------|-----------|----------|----------|---------------|------|-----|
| ENSMUSG00000027884 | 1,02E-01  | 5,151048784  | 1,95E+00  | 1,62E-01 | 5,12E-01 | Clcc1         | 1,07 | No  |
| ENSMUSG00000027889 | -1,43E-01 | 6,932556397  | 5,52E+00  | 1,88E-02 | 1,45E-01 | Ampd2         | 0,91 | No  |
| ENSMUSG00000027890 | -1,30E-01 | 3,619932433  | 1,80E+00  | 1,80E-01 | 5,41E-01 | Gstm4         | 0,91 | No  |
| ENSMUSG00000027893 | 2,94E-02  | 7,264027407  | 2,42E-01  | 6,23E-01 | 8,58E-01 | Ahcyl1        | 1,02 | No  |
| ENSMUSG00000027894 | -2,66E+00 | -3,033639428 | 2,81E+00  | 9,35E-02 | 3,83E-01 | Slc6a17       | 0,16 | No  |
| ENSMUSG00000027896 | 3,07E-01  | -0,117430511 | 9,91E-01  | 3,20E-01 | 6,20E-01 | Slc16a4       | 1,24 | No  |
| ENSMUSG00000027900 | 2,69E-02  | 6,0750147    | 1,72E-01  | 6,79E-01 | 8,93E-01 | Dram2         | 1,02 | No  |
| ENSMUSG00000027901 | 1,52E-02  | 3,53402721   | 2,41E-02  | 8,77E-01 | 1,00E+00 | Dennd2d       | 1,01 | No  |
| ENSMUSG00000027902 | -1,98E-02 | -3,033655952 | 2,83E-11  | 1,00E+00 | 1,00E+00 | Chil6         | 0,99 | No  |
| ENSMUSG00000027905 | -1,29E-02 | 4,552441464  | 2,62E-02  | 8,71E-01 | 1,00E+00 | Ddx20         | 0,99 | No  |
| ENSMUSG00000027907 | -4,75E-02 | 7,844012589  | 6,60E-01  | 4,16E-01 | 7,12E-01 | S100a11       | 0,97 | No  |
| ENSMUSG00000027908 | 2,64E+00  | -3,033673223 | 2,69E+00  | 1,01E-01 | 3,92E-01 | Tchhl1        | 6,23 | No  |
| ENSMUSG00000027913 | 9,01E-03  | -3,107646452 | -5,16E-10 | 1,00E+00 | 1,00E+00 | Crct1         | 1,01 | No  |
| ENSMUSG00000027931 | -6,71E-01 | 5,570499701  | 9,72E+01  | 6,21E-23 | 1,90E-20 | Npr1          | 0,63 | Yes |
| ENSMUSG00000027932 | 1,27E-01  | 5,664908684  | 3,54E+00  | 6,00E-02 | 3,03E-01 | Slc27a3       | 1,09 | No  |
| ENSMUSG00000027933 | -1,96E-01 | 6,188379547  | 9,40E+00  | 2,17E-03 | 2,98E-02 | Ints3         | 0,87 | Yes |
| ENSMUSG00000027935 | -3,33E-01 | 3,028597885  | 9,13E+00  | 2,52E-03 | 3,35E-02 | Rab13         | 0,79 | Yes |
| ENSMUSG00000027936 | -2,94E-01 | 6,184814858  | 2,09E+01  | 4,72E-06 | 1,72E-04 | Crtc2         | 0,82 | Yes |
| ENSMUSG00000027937 | -1,03E-01 | 5,5862469    | 2,25E+00  | 1,34E-01 | 4,60E-01 | Jtb           | 0,93 | No  |
| ENSMUSG00000027938 | -1,15E-01 | 0,288182316  | 1,92E-01  | 6,62E-01 | 8,83E-01 | Creb3l4       | 0,92 | No  |
| ENSMUSG00000027939 | -3,91E-01 | 1,058228097  | 3,73E+00  | 5,33E-02 | 2,82E-01 | Nup210l       | 0,76 | No  |
| ENSMUSG00000027940 | -2,53E-02 | 8,965286147  | 1,97E-01  | 6,57E-01 | 8,80E-01 | Tpm3          | 0,98 | No  |
| ENSMUSG00000027942 | 4,41E-02  | 4,975802937  | 3,54E-01  | 5,52E-01 | 8,18E-01 | 4933434E20Rik | 1,03 | No  |
| ENSMUSG00000027944 | -1,64E-01 | 3,850935772  | 3,26E+00  | 7,09E-02 | 3,37E-01 | Hax1          | 0,89 | No  |
| ENSMUSG00000027947 | 3,99E-01  | 5,722970587  | 3,48E+01  | 3,68E-09 | 2,73E-07 | Il6ra         | 1,32 | Yes |
| ENSMUSG00000027950 | -1,83E-01 | 4,370932081  | 5,07E+00  | 2,44E-02 | 1,72E-01 | Chrn2         | 0,88 | No  |
| ENSMUSG00000027951 | -1,28E-01 | 6,864211476  | 4,43E+00  | 3,54E-02 | 2,23E-01 | Adar          | 0,91 | No  |
| ENSMUSG00000027952 | -6,96E-04 | 4,845114889  | 8,50E-05  | 9,93E-01 | 1,00E+00 | Pmvk          | 1,00 | No  |
| ENSMUSG00000027953 | -9,65E-02 | 4,545731518  | 1,45E+00  | 2,29E-01 | 5,50E-01 | Slc50a1       | 0,94 | No  |
| ENSMUSG00000027954 | 1,59E+00  | -2,548225812 | 1,74E+00  | 1,87E-01 | 5,50E-01 | Efna1         | 3,02 | No  |
| ENSMUSG00000027955 | 4,11E-01  | 5,910886846  | 3,80E+01  | 6,91E-10 | 5,80E-08 | Fam198b       | 1,33 | Yes |
| ENSMUSG00000027956 | 2,58E-01  | 3,50152439   | 6,66E+00  | 9,85E-03 | 9,22E-02 | Tmem144       | 1,20 | No  |

|                    |           |              |           |          |          |          |      |     |
|--------------------|-----------|--------------|-----------|----------|----------|----------|------|-----|
| ENSMUSG00000027957 | 1,04E-01  | 6,001324078  | 2,50E+00  | 1,14E-01 | 4,16E-01 | Slc35a3  | 1,07 | No  |
| ENSMUSG00000027959 | 1,67E-01  | 3,565086507  | 2,91E+00  | 8,78E-02 | 3,78E-01 | Sass6    | 1,12 | No  |
| ENSMUSG00000027961 | -1,16E-01 | 2,095045995  | 6,39E-01  | 4,24E-01 | 7,18E-01 | Lrrc39   | 0,92 | No  |
| ENSMUSG00000027962 | -2,72E-01 | 2,117721777  | 3,80E+00  | 5,12E-02 | 2,75E-01 | Vcam1    | 0,83 | No  |
| ENSMUSG00000027963 | 2,85E-01  | 3,920445774  | 9,96E+00  | 1,60E-03 | 2,34E-02 | Extl2    | 1,22 | Yes |
| ENSMUSG00000027967 | 7,06E-01  | -2,896175605 | 2,71E-01  | 6,03E-01 | 8,48E-01 | Neurog2  | 1,63 | No  |
| ENSMUSG00000027968 | 1,03E-01  | 4,278803678  | 1,46E+00  | 2,28E-01 | 5,50E-01 | Larp7    | 1,07 | No  |
| ENSMUSG00000027978 | -3,09E-02 | -2,832023973 | 6,09E-04  | 9,80E-01 | 1,00E+00 | Prss12   | 0,98 | No  |
| ENSMUSG00000027981 | -7,53E-02 | 3,386299507  | 5,31E-01  | 4,66E-01 | 7,55E-01 | Rnpc3    | 0,95 | No  |
| ENSMUSG00000027983 | 1,69E-01  | -1,548156603 | 8,97E-02  | 7,65E-01 | 9,39E-01 | Cyp2u1   | 1,12 | No  |
| ENSMUSG00000027984 | 7,34E-02  | 5,05697055   | 9,98E-01  | 3,18E-01 | 6,19E-01 | Hadh     | 1,05 | No  |
| ENSMUSG00000027985 | -5,23E-01 | -0,887856182 | 1,56E+00  | 2,11E-01 | 5,50E-01 | Lef1     | 0,70 | No  |
| ENSMUSG00000027993 | 4,24E-02  | 3,101941067  | 1,49E-01  | 7,00E-01 | 9,04E-01 | Trim2    | 1,03 | No  |
| ENSMUSG00000027994 | 1,87E-01  | 6,251343947  | 8,54E+00  | 3,48E-03 | 4,27E-02 | Mcub     | 1,14 | Yes |
| ENSMUSG00000027995 | -9,46E-02 | 8,320286145  | 2,67E+00  | 1,02E-01 | 3,94E-01 | Tlr2     | 0,94 | No  |
| ENSMUSG00000027996 | -4,49E-01 | -2,051763865 | 3,71E-01  | 5,43E-01 | 8,12E-01 | Sfrp2    | 0,73 | No  |
| ENSMUSG00000027997 | 9,05E-02  | 4,95440584   | 1,46E+00  | 2,26E-01 | 5,50E-01 | Casp6    | 1,06 | No  |
| ENSMUSG00000027998 | -7,81E-03 | 4,788208527  | 1,04E-02  | 9,19E-01 | 1,00E+00 | Plrg1    | 0,99 | No  |
| ENSMUSG00000027999 | -7,02E-02 | 3,350585342  | 4,55E-01  | 5,00E-01 | 7,85E-01 | Pla2g12a | 0,95 | No  |
| ENSMUSG00000028005 | -2,69E+00 | -2,896150581 | 2,87E+00  | 9,05E-02 | 3,81E-01 | Gucy1b3  | 0,16 | No  |
| ENSMUSG00000028007 | -3,02E-02 | 4,199743184  | 1,24E-01  | 7,24E-01 | 9,18E-01 | Snx7     | 0,98 | No  |
| ENSMUSG00000028008 | -1,89E+00 | -3,1076441   | 1,42E+00  | 2,33E-01 | 5,50E-01 | Asic5    | 0,27 | No  |
| ENSMUSG00000028010 | -3,08E-02 | 3,637992247  | 1,02E-01  | 7,49E-01 | 9,31E-01 | Gar1     | 0,98 | No  |
| ENSMUSG00000028011 | 7,60E-01  | -1,801045949 | 1,22E+00  | 2,69E-01 | 5,65E-01 | Tdo2     | 1,69 | No  |
| ENSMUSG00000028012 | -2,24E-01 | -0,641280267 | 3,44E-01  | 5,58E-01 | 8,22E-01 | Rrh      | 0,86 | No  |
| ENSMUSG00000028013 | -5,57E-02 | 3,592383087  | 3,31E-01  | 5,65E-01 | 8,28E-01 | Ppa2     | 0,96 | No  |
| ENSMUSG00000028015 | 1,11E-01  | 5,015752718  | 2,25E+00  | 1,33E-01 | 4,60E-01 | Ctso     | 1,08 | No  |
| ENSMUSG00000028016 | 4,42E-02  | 5,144527172  | 3,72E-01  | 5,42E-01 | 8,11E-01 | Ints12   | 1,03 | No  |
| ENSMUSG00000028017 | -4,33E-01 | 1,799288502  | 7,50E+00  | 6,18E-03 | 6,56E-02 | Egf      | 0,74 | No  |
| ENSMUSG00000028018 | 5,29E-02  | 3,983680727  | 3,54E-01  | 5,52E-01 | 8,18E-01 | Gstcd    | 1,04 | No  |
| ENSMUSG00000028019 | 5,18E-01  | 3,247250467  | 2,31E+01  | 1,54E-06 | 6,49E-05 | Pdgfc    | 1,43 | Yes |
| ENSMUSG00000028020 | 3,14E-02  | -3,107617333 | -7,69E-10 | 1,00E+00 | 1,00E+00 | Glr3     | 1,02 | No  |

|                    |           |              |           |          |          |               |      |     |
|--------------------|-----------|--------------|-----------|----------|----------|---------------|------|-----|
| ENSMUSG00000028023 | -1,87E+00 | -3,033619006 | 1,41E+00  | 2,36E-01 | 5,50E-01 | Pitx2         | 0,27 | No  |
| ENSMUSG00000028024 | 9,01E-03  | -3,107646452 | -5,16E-10 | 1,00E+00 | 1,00E+00 | Enpep         | 1,01 | No  |
| ENSMUSG00000028028 | 1,26E-01  | 5,09517082   | 3,01E+00  | 8,29E-02 | 3,70E-01 | Alpk1         | 1,09 | No  |
| ENSMUSG00000028029 | -1,23E-01 | 5,080047081  | 2,84E+00  | 9,21E-02 | 3,82E-01 | Aimp1         | 0,92 | No  |
| ENSMUSG00000028030 | 1,62E-01  | 4,616592584  | 4,26E+00  | 3,91E-02 | 2,35E-01 | Tbck          | 1,12 | No  |
| ENSMUSG00000028031 | 5,79E-01  | -2,226295553 | 5,68E-01  | 4,51E-01 | 7,41E-01 | Dkk2          | 1,49 | No  |
| ENSMUSG00000028032 | 1,49E-01  | 5,364741944  | 4,48E+00  | 3,43E-02 | 2,18E-01 | Papss1        | 1,11 | No  |
| ENSMUSG00000028033 | -3,58E+00 | -2,770569053 | 5,77E+00  | 1,63E-02 | 1,33E-01 | Kcnq5         | 0,08 | No  |
| ENSMUSG00000028034 | -1,10E-01 | 6,295493688  | 2,98E+00  | 8,41E-02 | 3,72E-01 | Fubp1         | 0,93 | No  |
| ENSMUSG00000028035 | 8,69E-02  | 4,146572395  | 1,01E+00  | 3,15E-01 | 6,16E-01 | Dnajb4        | 1,06 | No  |
| ENSMUSG00000028036 | -8,41E-01 | -2,896156011 | 3,88E-01  | 5,33E-01 | 8,06E-01 | Ptgfr         | 0,56 | No  |
| ENSMUSG00000028037 | -7,50E-01 | 0,844748347  | 1,30E+01  | 3,12E-04 | 6,26E-03 | Ifi44         | 0,59 | Yes |
| ENSMUSG00000028039 | 2,99E-01  | -2,929300307 | 5,55E-02  | 8,14E-01 | 9,68E-01 | Efna3         | 1,23 | No  |
| ENSMUSG00000028040 | -6,16E-02 | -2,107661822 | 7,05E-03  | 9,33E-01 | 1,00E+00 | Efna4         | 0,96 | No  |
| ENSMUSG00000028041 | 2,36E-01  | 7,483720553  | 1,57E+01  | 7,39E-05 | 1,88E-03 | Adam15        | 1,18 | Yes |
| ENSMUSG00000028042 | 1,41E-01  | 6,659771623  | 5,22E+00  | 2,23E-02 | 1,62E-01 | Zbtb7b        | 1,10 | No  |
| ENSMUSG00000028044 | 1,54E-01  | 4,787768928  | 4,01E+00  | 4,53E-02 | 2,54E-01 | Cks1b         | 1,11 | No  |
| ENSMUSG00000028047 | -5,65E-01 | -0,580763298 | 2,42E+00  | 1,20E-01 | 4,31E-01 | Thbs3         | 0,68 | No  |
| ENSMUSG00000028048 | 8,52E-02  | 7,144057202  | 2,00E+00  | 1,57E-01 | 5,03E-01 | Gba           | 1,06 | No  |
| ENSMUSG00000028049 | 8,54E-02  | 5,66403156   | 1,58E+00  | 2,09E-01 | 5,50E-01 | Scamp3        | 1,06 | No  |
| ENSMUSG00000028051 | -1,82E-01 | 3,176614697  | 2,96E+00  | 8,54E-02 | 3,76E-01 | Hcn3          | 0,88 | No  |
| ENSMUSG00000028053 | -5,29E-02 | 6,406982382  | 7,03E-01  | 4,02E-01 | 7,00E-01 | Ash1l         | 0,96 | No  |
| ENSMUSG00000028057 | -5,29E-02 | 5,335236765  | 5,62E-01  | 4,53E-01 | 7,43E-01 | Rit1          | 0,96 | No  |
| ENSMUSG00000028059 | -7,86E-02 | 7,216919062  | 1,73E+00  | 1,89E-01 | 5,50E-01 | Arhgef2       | 0,95 | No  |
| ENSMUSG00000028060 | -9,09E-02 | 5,888448217  | 1,89E+00  | 1,69E-01 | 5,24E-01 | 2810403A07Rik | 0,94 | No  |
| ENSMUSG00000028062 | -1,18E-02 | 5,03875387   | 2,55E-02  | 8,73E-01 | 1,00E+00 | Lamtor2       | 0,99 | No  |
| ENSMUSG00000028063 | 2,57E-01  | 6,679333201  | 1,70E+01  | 3,75E-05 | 1,06E-03 | Lmna          | 1,20 | Yes |
| ENSMUSG00000028064 | -3,22E-02 | 9,054095686  | 3,21E-01  | 5,71E-01 | 8,31E-01 | Sema4a        | 0,98 | No  |
| ENSMUSG00000028066 | 4,34E-02  | 4,405901999  | 2,74E-01  | 6,00E-01 | 8,47E-01 | Pmf1          | 1,03 | No  |
| ENSMUSG00000028068 | 2,84E-01  | 5,623138552  | 1,73E+01  | 3,16E-05 | 9,17E-04 | Iqgap3        | 1,22 | Yes |
| ENSMUSG00000028069 | 6,40E-02  | 3,569338204  | 4,34E-01  | 5,10E-01 | 7,93E-01 | Gpatch4       | 1,05 | No  |
| ENSMUSG00000028070 | -4,54E-01 | 5,780550078  | 4,67E+01  | 8,37E-12 | 8,89E-10 | Naxe          | 0,73 | Yes |

|                    |           |              |          |          |          |         |      |     |
|--------------------|-----------|--------------|----------|----------|----------|---------|------|-----|
| ENSMUSG00000028071 | -2,71E+00 | -2,896102977 | 2,90E+00 | 8,85E-02 | 3,79E-01 | Sh2d2a  | 0,15 | No  |
| ENSMUSG00000028073 | -1,27E+00 | -2,448638756 | 1,54E+00 | 2,14E-01 | 5,50E-01 | Pear1   | 0,41 | No  |
| ENSMUSG00000028076 | -4,44E-02 | 6,39634515   | 4,93E-01 | 4,83E-01 | 7,70E-01 | Cd1d1   | 0,97 | No  |
| ENSMUSG00000028078 | -1,13E-01 | 1,259545579  | 3,63E-01 | 5,47E-01 | 8,14E-01 | Dclk2   | 0,92 | No  |
| ENSMUSG00000028080 | 5,31E-02  | 5,176812699  | 5,39E-01 | 4,63E-01 | 7,51E-01 | Lrba    | 1,04 | No  |
| ENSMUSG00000028081 | -4,72E-02 | 6,808136968  | 5,92E-01 | 4,42E-01 | 7,34E-01 | Rps3a1  | 0,97 | No  |
| ENSMUSG00000028082 | 2,13E-03  | 2,31522618   | 2,50E-04 | 9,87E-01 | 1,00E+00 | Sh3d19  | 1,00 | No  |
| ENSMUSG00000028085 | 6,78E-02  | 3,395560169  | 4,45E-01 | 5,05E-01 | 7,89E-01 | Gatb    | 1,05 | No  |
| ENSMUSG00000028086 | 1,26E-01  | 4,98696155   | 2,84E+00 | 9,18E-02 | 3,82E-01 | Fbxw7   | 1,09 | No  |
| ENSMUSG00000028088 | -7,80E-02 | 2,88183476   | 4,54E-01 | 5,00E-01 | 7,85E-01 | Fmo5    | 0,95 | No  |
| ENSMUSG00000028089 | -4,10E-02 | 3,590667504  | 1,79E-01 | 6,72E-01 | 8,89E-01 | Chd1l   | 0,97 | No  |
| ENSMUSG00000028093 | 2,26E-01  | 3,365647097  | 4,87E+00 | 2,74E-02 | 1,86E-01 | Acp6    | 1,17 | No  |
| ENSMUSG00000028096 | 1,68E-01  | 4,673302273  | 4,61E+00 | 3,18E-02 | 2,07E-01 | Gpr89   | 1,12 | No  |
| ENSMUSG00000028098 | -3,64E-01 | 6,765663203  | 3,51E+01 | 3,11E-09 | 2,35E-07 | Rnf115  | 0,78 | Yes |
| ENSMUSG00000028099 | -2,98E-01 | 6,35131651   | 2,23E+01 | 2,34E-06 | 9,32E-05 | Polr3c  | 0,81 | Yes |
| ENSMUSG00000028100 | -7,86E-01 | 5,383823033  | 1,28E+02 | 1,38E-29 | 7,68E-27 | Nudt17  | 0,58 | Yes |
| ENSMUSG00000028101 | -2,10E-01 | 4,86377724   | 7,96E+00 | 4,78E-03 | 5,41E-02 | Pias3   | 0,86 | No  |
| ENSMUSG00000028102 | 7,32E-02  | 3,941635899  | 6,73E-01 | 4,12E-01 | 7,08E-01 | Pex11b  | 1,05 | No  |
| ENSMUSG00000028104 | -1,99E-02 | 3,300340668  | 3,60E-02 | 8,50E-01 | 9,89E-01 | Polr3gl | 0,99 | No  |
| ENSMUSG00000028106 | -9,48E-02 | 6,077381517  | 2,14E+00 | 1,43E-01 | 4,79E-01 | Rprd2   | 0,94 | No  |
| ENSMUSG00000028107 | -2,57E-02 | 4,922746373  | 1,19E-01 | 7,31E-01 | 9,21E-01 | Tars2   | 0,98 | No  |
| ENSMUSG00000028108 | 8,44E-02  | 4,999800429  | 1,27E+00 | 2,60E-01 | 5,53E-01 | Ecm1    | 1,06 | No  |
| ENSMUSG00000028109 | -5,14E-02 | -2,600715381 | 2,98E-03 | 9,56E-01 | 1,00E+00 | Hormad1 | 0,96 | No  |
| ENSMUSG00000028111 | 3,99E-01  | 5,603016693  | 3,36E+01 | 6,62E-09 | 4,77E-07 | Ctsk    | 1,32 | Yes |
| ENSMUSG00000028114 | 2,17E-01  | 4,352464956  | 6,81E+00 | 9,06E-03 | 8,68E-02 | Mettl14 | 1,16 | No  |
| ENSMUSG00000028115 | -4,89E-01 | -1,401292542 | 7,06E-01 | 4,01E-01 | 6,99E-01 | Bnipl   | 0,71 | No  |
| ENSMUSG00000028121 | 3,73E-01  | 6,062085011  | 3,23E+01 | 1,31E-08 | 8,91E-07 | Bcar3   | 1,30 | Yes |
| ENSMUSG00000028124 | 1,21E-01  | 7,176341614  | 4,03E+00 | 4,47E-02 | 2,52E-01 | Gclm    | 1,09 | No  |
| ENSMUSG00000028125 | 1,84E+00  | -3,033632273 | 1,33E+00 | 2,49E-01 | 5,50E-01 | Abca4   | 3,58 | No  |
| ENSMUSG00000028126 | 1,13E-02  | 5,363468837  | 2,60E-02 | 8,72E-01 | 1,00E+00 | Pip5k1a | 1,01 | No  |
| ENSMUSG00000028127 | 1,61E-02  | 4,827295835  | 4,54E-02 | 8,31E-01 | 9,78E-01 | Abcd3   | 1,01 | No  |
| ENSMUSG00000028128 | 4,97E-02  | 1,128717337  | 6,88E-02 | 7,93E-01 | 9,56E-01 | F3      | 1,04 | No  |

|                    |           |              |           |          |          |               |      |     |
|--------------------|-----------|--------------|-----------|----------|----------|---------------|------|-----|
| ENSMUSG00000028132 | 3,14E-02  | -3,107617333 | -7,69E-10 | 1,00E+00 | 1,00E+00 | Tmem56        | 1,02 | No  |
| ENSMUSG00000028133 | -2,61E-03 | -0,785736984 | 3,68E-05  | 9,95E-01 | 1,00E+00 | Rwdd3         | 1,00 | No  |
| ENSMUSG00000028134 | -1,22E-01 | 5,438721151  | 3,02E+00  | 8,22E-02 | 3,68E-01 | Ptbp2         | 0,92 | No  |
| ENSMUSG00000028136 | 9,75E-02  | 6,47572094   | 2,40E+00  | 1,21E-01 | 4,35E-01 | Snx27         | 1,07 | No  |
| ENSMUSG00000028137 | 2,56E-01  | 0,616018862  | 1,12E+00  | 2,90E-01 | 5,86E-01 | Celf3         | 1,19 | No  |
| ENSMUSG00000028138 | -3,08E-02 | 6,284638295  | 2,32E-01  | 6,30E-01 | 8,62E-01 | Adh5          | 0,98 | No  |
| ENSMUSG00000028139 | -1,12E-02 | -0,96326913  | 6,57E-04  | 9,80E-01 | 1,00E+00 | Riid1         | 0,99 | No  |
| ENSMUSG00000028140 | -9,12E-02 | 5,087887026  | 1,56E+00  | 2,12E-01 | 5,50E-01 | Mrpl9         | 0,94 | No  |
| ENSMUSG00000028141 | -3,16E-01 | 1,551457902  | 3,30E+00  | 6,93E-02 | 3,32E-01 | Oaz3          | 0,80 | No  |
| ENSMUSG00000028145 | 2,84E-01  | 2,249184935  | 4,27E+00  | 3,89E-02 | 2,34E-01 | Them4         | 1,22 | No  |
| ENSMUSG00000028148 | 9,01E-03  | -3,107646452 | -5,16E-10 | 1,00E+00 | 1,00E+00 | Them5         | 1,01 | No  |
| ENSMUSG00000028149 | 6,67E-02  | 6,97087091   | 1,20E+00  | 2,73E-01 | 5,69E-01 | Rap1gds1      | 1,05 | No  |
| ENSMUSG00000028150 | -1,90E+00 | -3,033647263 | 1,44E+00  | 2,30E-01 | 5,50E-01 | Rorc          | 0,27 | No  |
| ENSMUSG00000028152 | 1,49E-01  | 6,250784443  | 5,41E+00  | 2,00E-02 | 1,51E-01 | Tspan5        | 1,11 | No  |
| ENSMUSG00000028156 | 1,04E-01  | 5,522551789  | 2,26E+00  | 1,33E-01 | 4,59E-01 | Eif4e         | 1,07 | No  |
| ENSMUSG00000028158 | -4,86E-01 | 0,369074231  | 3,58E+00  | 5,86E-02 | 2,99E-01 | Mttp          | 0,71 | No  |
| ENSMUSG00000028159 | -2,76E-01 | 5,408678847  | 1,59E+01  | 6,79E-05 | 1,76E-03 | Dapp1         | 0,83 | Yes |
| ENSMUSG00000028161 | -1,85E-01 | 6,659257148  | 8,90E+00  | 2,85E-03 | 3,68E-02 | Ppp3ca        | 0,88 | Yes |
| ENSMUSG00000028163 | -2,66E-01 | 8,053675326  | 2,10E+01  | 4,67E-06 | 1,70E-04 | Nfkb1         | 0,83 | Yes |
| ENSMUSG00000028164 | 1,38E-01  | 6,761507961  | 5,00E+00  | 2,54E-02 | 1,77E-01 | Manba         | 1,10 | No  |
| ENSMUSG00000028165 | -7,08E-03 | 6,55107923   | 1,28E-02  | 9,10E-01 | 1,00E+00 | Cisd2         | 1,00 | No  |
| ENSMUSG00000028167 | -9,81E-01 | -2,448591755 | 1,17E+00  | 2,80E-01 | 5,77E-01 | Bdh2          | 0,51 | No  |
| ENSMUSG00000028173 | 2,88E-02  | 6,838554199  | 2,20E-01  | 6,39E-01 | 8,69E-01 | Wls           | 1,02 | No  |
| ENSMUSG00000028175 | 1,99E-01  | 3,002618406  | 3,01E+00  | 8,27E-02 | 3,70E-01 | Depdc1a       | 1,15 | No  |
| ENSMUSG00000028176 | -1,90E+00 | -3,033647263 | 1,44E+00  | 2,30E-01 | 5,50E-01 | Lrrc7         | 0,27 | No  |
| ENSMUSG00000028177 | -1,87E+00 | -3,107637761 | 1,39E+00  | 2,38E-01 | 5,50E-01 | 1810013D15Rik | 0,27 | No  |
| ENSMUSG00000028179 | -7,02E-01 | -2,146004908 | 8,39E-01  | 3,60E-01 | 6,61E-01 | Cth           | 0,61 | No  |
| ENSMUSG00000028180 | -2,86E-03 | 5,550504175  | 1,75E-03  | 9,67E-01 | 1,00E+00 | Zranb2        | 1,00 | No  |
| ENSMUSG00000028182 | 4,19E-02  | -0,832118767 | 1,11E-02  | 9,16E-01 | 1,00E+00 | Lrriq3        | 1,03 | No  |
| ENSMUSG00000028184 | 1,01E-01  | 4,994930876  | 1,80E+00  | 1,80E-01 | 5,42E-01 | Adgrl2        | 1,07 | No  |
| ENSMUSG00000028185 | 3,14E-02  | -3,107617333 | -7,69E-10 | 1,00E+00 | 1,00E+00 | Dnase2b       | 1,02 | No  |
| ENSMUSG00000028186 | 1,85E+00  | -3,107657832 | 1,35E+00  | 2,46E-01 | 5,50E-01 | Uox           | 3,61 | No  |



|                    |           |              |          |          |          |           |      |     |
|--------------------|-----------|--------------|----------|----------|----------|-----------|------|-----|
| ENSMUSG00000028187 | -6,16E-03 | 4,275172279  | 5,41E-03 | 9,41E-01 | 1,00E+00 | Rpf1      | 1,00 | No  |
| ENSMUSG00000028188 | 2,62E-01  | 2,025900096  | 3,13E+00 | 7,69E-02 | 3,54E-01 | Spata1    | 1,20 | No  |
| ENSMUSG00000028189 | 2,15E-01  | 4,119649189  | 6,23E+00 | 1,25E-02 | 1,10E-01 | Ctbs      | 1,16 | No  |
| ENSMUSG00000028191 | -4,02E-02 | 6,214349164  | 3,93E-01 | 5,31E-01 | 8,05E-01 | Bcl10     | 0,97 | No  |
| ENSMUSG00000028194 | -8,69E-01 | -2,963204587 | 4,16E-01 | 5,19E-01 | 7,98E-01 | Ddah1     | 0,55 | No  |
| ENSMUSG00000028195 | -6,00E-01 | -1,424739823 | 1,20E+00 | 2,73E-01 | 5,69E-01 | Cyr61     | 0,66 | No  |
| ENSMUSG00000028197 | -6,36E-02 | 1,639046614  | 1,49E-01 | 6,99E-01 | 9,04E-01 | Col24a1   | 0,96 | No  |
| ENSMUSG00000028199 | 2,17E-01  | 2,451983278  | 2,64E+00 | 1,04E-01 | 3,97E-01 | Cryz      | 1,16 | No  |
| ENSMUSG00000028207 | 3,47E-02  | 5,737957542  | 2,66E-01 | 6,06E-01 | 8,49E-01 | Asph      | 1,02 | No  |
| ENSMUSG00000028211 | 7,34E-02  | 6,9529055    | 1,46E+00 | 2,27E-01 | 5,50E-01 | Trp53inp1 | 1,05 | No  |
| ENSMUSG00000028212 | 3,45E-01  | 4,178432888  | 1,62E+01 | 5,84E-05 | 1,55E-03 | Ccne2     | 1,27 | Yes |
| ENSMUSG00000028214 | -5,28E-01 | 3,251311089  | 2,41E+01 | 9,16E-07 | 4,12E-05 | Gem       | 0,69 | Yes |
| ENSMUSG00000028217 | 2,56E-01  | 3,135152189  | 5,38E+00 | 2,03E-02 | 1,53E-01 | Cdh17     | 1,19 | No  |
| ENSMUSG00000028218 | -4,22E-02 | 2,553240019  | 1,09E-01 | 7,42E-01 | 9,27E-01 | Fam92a    | 0,97 | No  |
| ENSMUSG00000028221 | 1,14E-01  | 4,733147318  | 2,17E+00 | 1,41E-01 | 4,74E-01 | Tmem55a   | 1,08 | No  |
| ENSMUSG00000028222 | -2,74E+00 | -3,033596063 | 2,99E+00 | 8,38E-02 | 3,71E-01 | Calb1     | 0,15 | No  |
| ENSMUSG00000028223 | -7,26E-02 | 4,269832993  | 7,57E-01 | 3,84E-01 | 6,86E-01 | Decr1     | 0,95 | No  |
| ENSMUSG00000028224 | -1,72E-01 | 4,109819943  | 3,95E+00 | 4,70E-02 | 2,59E-01 | Nbn       | 0,89 | No  |
| ENSMUSG00000028226 | -2,65E+00 | -2,963225595 | 2,80E+00 | 9,41E-02 | 3,84E-01 | Mmp16     | 0,16 | No  |
| ENSMUSG00000028228 | 1,22E-01  | 6,522567769  | 3,78E+00 | 5,19E-02 | 2,77E-01 | Cpne3     | 1,09 | No  |
| ENSMUSG00000028229 | 6,78E-02  | 2,237538382  | 2,34E-01 | 6,29E-01 | 8,62E-01 | Rmdn1     | 1,05 | No  |
| ENSMUSG00000028232 | 2,03E-01  | 5,097556325  | 7,64E+00 | 5,71E-03 | 6,17E-02 | Tmem68    | 1,15 | No  |
| ENSMUSG00000028233 | 1,30E-01  | 5,774662808  | 3,80E+00 | 5,13E-02 | 2,75E-01 | Tgs1      | 1,09 | No  |
| ENSMUSG00000028234 | -1,82E-01 | 7,058691654  | 9,09E+00 | 2,57E-03 | 3,41E-02 | Rps20     | 0,88 | Yes |
| ENSMUSG00000028238 | 9,82E-02  | 8,697198184  | 2,95E+00 | 8,61E-02 | 3,78E-01 | Atp6v0d2  | 1,07 | No  |
| ENSMUSG00000028240 | -7,38E-02 | -3,033659033 | 2,66E-03 | 9,59E-01 | 1,00E+00 | Cyp7a1    | 0,95 | No  |
| ENSMUSG00000028243 | 1,88E-01  | 3,576180742  | 3,70E+00 | 5,45E-02 | 2,86E-01 | Ubxn2b    | 1,14 | No  |
| ENSMUSG00000028245 | 2,82E-02  | 5,423969602  | 1,64E-01 | 6,86E-01 | 8,97E-01 | Nsmaf     | 1,02 | No  |
| ENSMUSG00000028246 | -1,94E+00 | -3,107619243 | 1,50E+00 | 2,21E-01 | 5,50E-01 | Faxc      | 0,26 | No  |
| ENSMUSG00000028247 | 2,81E-01  | 3,474377258  | 7,79E+00 | 5,25E-03 | 5,79E-02 | Coq3      | 1,21 | No  |
| ENSMUSG00000028248 | -1,75E-01 | 6,757658999  | 8,10E+00 | 4,42E-03 | 5,09E-02 | Pnlsr     | 0,89 | No  |
| ENSMUSG00000028249 | 1,07E-01  | 9,051205587  | 3,56E+00 | 5,92E-02 | 3,01E-01 | Sdcbp     | 1,08 | No  |

|                    |           |              |          |          |          |               |      |     |
|--------------------|-----------|--------------|----------|----------|----------|---------------|------|-----|
| ENSMUSG00000028251 | 9,44E-02  | 4,397758551  | 1,32E+00 | 2,50E-01 | 5,50E-01 | Tstd3         | 1,07 | No  |
| ENSMUSG00000028252 | 9,71E-02  | 4,732258249  | 1,59E+00 | 2,07E-01 | 5,50E-01 | Ccnc          | 1,07 | No  |
| ENSMUSG00000028256 | 1,82E-01  | 3,424994222  | 3,22E+00 | 7,27E-02 | 3,42E-01 | Odf2l         | 1,13 | No  |
| ENSMUSG00000028261 | 5,95E-03  | 4,099232373  | 4,64E-03 | 9,46E-01 | 1,00E+00 | Ndufaf4       | 1,00 | No  |
| ENSMUSG00000028262 | -1,89E+00 | -3,1076441   | 1,42E+00 | 2,33E-01 | 5,50E-01 | Clca3a2       | 0,27 | No  |
| ENSMUSG00000028264 | -7,98E-01 | -2,963241606 | 3,44E-01 | 5,57E-01 | 8,21E-01 | Spaca1        | 0,58 | No  |
| ENSMUSG00000028266 | 2,47E-01  | 5,637715703  | 1,31E+01 | 2,96E-04 | 5,99E-03 | Lmo4          | 1,19 | Yes |
| ENSMUSG00000028268 | -1,48E-01 | 5,838201072  | 4,97E+00 | 2,57E-02 | 1,78E-01 | Gbp3          | 0,90 | No  |
| ENSMUSG00000028270 | -3,32E-01 | 7,24107615   | 3,09E+01 | 2,78E-08 | 1,74E-06 | Gbp2          | 0,79 | Yes |
| ENSMUSG00000028271 | -1,40E-01 | 5,666328793  | 4,29E+00 | 3,84E-02 | 2,33E-01 | Gtf2b         | 0,91 | No  |
| ENSMUSG00000028273 | -4,71E-02 | 7,366150069  | 6,27E-01 | 4,28E-01 | 7,22E-01 | Pdlim5        | 0,97 | No  |
| ENSMUSG00000028274 | 1,26E-01  | 4,358189878  | 2,32E+00 | 1,28E-01 | 4,48E-01 | Rngtt         | 1,09 | No  |
| ENSMUSG00000028277 | 3,67E-03  | 6,770051924  | 3,54E-03 | 9,53E-01 | 1,00E+00 | Ube2j1        | 1,00 | No  |
| ENSMUSG00000028278 | -4,25E-01 | 3,771136359  | 2,12E+01 | 4,21E-06 | 1,56E-04 | Rragd         | 0,74 | Yes |
| ENSMUSG00000028280 | -9,24E-01 | -2,448697831 | 7,49E-01 | 3,87E-01 | 6,87E-01 | Gabbr1        | 0,53 | No  |
| ENSMUSG00000028282 | 1,49E-01  | 5,114856651  | 4,20E+00 | 4,04E-02 | 2,38E-01 | Casp8ap2      | 1,11 | No  |
| ENSMUSG00000028284 | 2,25E-02  | 6,076704779  | 1,19E-01 | 7,30E-01 | 9,21E-01 | Map3k7        | 1,02 | No  |
| ENSMUSG00000028289 | -8,68E-02 | -2,226296834 | 1,40E-02 | 9,06E-01 | 1,00E+00 | Epha7         | 0,94 | No  |
| ENSMUSG00000028291 | 2,03E-01  | 5,248179988  | 8,11E+00 | 4,40E-03 | 5,07E-02 | Akirin2       | 1,15 | No  |
| ENSMUSG00000028292 | 6,37E-02  | 2,881172163  | 3,06E-01 | 5,80E-01 | 8,37E-01 | Rars2         | 1,05 | No  |
| ENSMUSG00000028293 | 9,82E-02  | 4,14369659   | 1,29E+00 | 2,55E-01 | 5,50E-01 | Slc35a1       | 1,07 | No  |
| ENSMUSG00000028294 | -8,69E-01 | -2,963204587 | 4,16E-01 | 5,19E-01 | 7,98E-01 | Cfap206       | 0,55 | No  |
| ENSMUSG00000028295 | -1,85E-01 | 2,516674877  | 2,10E+00 | 1,48E-01 | 4,87E-01 | Smim8         | 0,88 | No  |
| ENSMUSG00000028300 | -9,77E-03 | 5,276784342  | 1,91E-02 | 8,90E-01 | 1,00E+00 | 3110043O21Rik | 0,99 | No  |
| ENSMUSG00000028307 | -7,94E-01 | -2,896102912 | 3,44E-01 | 5,57E-01 | 8,21E-01 | Aldob         | 0,58 | No  |
| ENSMUSG00000028309 | -2,97E-02 | 6,274588708  | 2,17E-01 | 6,41E-01 | 8,71E-01 | Rnf20         | 0,98 | No  |
| ENSMUSG00000028310 | -2,66E+00 | -3,033639428 | 2,81E+00 | 9,35E-02 | 3,83E-01 | Ppp3r2        | 0,16 | No  |
| ENSMUSG00000028312 | 1,99E-01  | 6,590971754  | 1,01E+01 | 1,46E-03 | 2,19E-02 | Smc2          | 1,15 | Yes |
| ENSMUSG00000028318 | 1,56E-01  | 2,63114465   | 1,53E+00 | 2,16E-01 | 5,50E-01 | Polr1e        | 1,11 | No  |
| ENSMUSG00000028322 | 1,42E-02  | 4,018160407  | 2,55E-02 | 8,73E-01 | 1,00E+00 | Exosc3        | 1,01 | No  |
| ENSMUSG00000028327 | 1,72E-01  | 4,405264937  | 4,51E+00 | 3,37E-02 | 2,16E-01 | Stra6l        | 1,13 | No  |
| ENSMUSG00000028328 | 3,89E-02  | 2,805974284  | 1,10E-01 | 7,40E-01 | 9,26E-01 | Tmod1         | 1,03 | No  |

|                    |           |              |          |          |          |         |      |     |
|--------------------|-----------|--------------|----------|----------|----------|---------|------|-----|
| ENSMUSG00000028329 | -2,08E-01 | 3,128235287  | 3,61E+00 | 5,74E-02 | 2,95E-01 | Xpa     | 0,87 | No  |
| ENSMUSG00000028330 | 3,86E-02  | 5,579710343  | 3,17E-01 | 5,73E-01 | 8,33E-01 | Ncbp1   | 1,03 | No  |
| ENSMUSG00000028331 | 1,83E-01  | 2,164167814  | 1,67E+00 | 1,96E-01 | 5,50E-01 | Trmo    | 1,14 | No  |
| ENSMUSG00000028332 | 1,99E+00  | -0,801464899 | 2,02E+01 | 6,96E-06 | 2,42E-04 | Hemgn   | 3,98 | Yes |
| ENSMUSG00000028333 | 5,81E-02  | 6,985221607  | 9,12E-01 | 3,40E-01 | 6,40E-01 | Anp32b  | 1,04 | No  |
| ENSMUSG00000028334 | -8,28E-02 | 6,955462462  | 1,85E+00 | 1,74E-01 | 5,31E-01 | Nans    | 0,94 | No  |
| ENSMUSG00000028337 | -2,42E-02 | 8,915000856  | 1,81E-01 | 6,71E-01 | 8,88E-01 | Coro2a  | 0,98 | No  |
| ENSMUSG00000028339 | 4,01E-01  | 2,627095159  | 1,03E+01 | 1,35E-03 | 2,06E-02 | Col15a1 | 1,32 | Yes |
| ENSMUSG00000028341 | -4,87E-01 | 8,207707103  | 7,08E+01 | 3,88E-17 | 7,23E-15 | Nr4a3   | 0,71 | Yes |
| ENSMUSG00000028343 | 8,18E-02  | 6,030749263  | 1,57E+00 | 2,11E-01 | 5,50E-01 | Erp44   | 1,06 | No  |
| ENSMUSG00000028344 | -8,27E-02 | 3,779336293  | 7,82E-01 | 3,76E-01 | 6,77E-01 | Invs    | 0,94 | No  |
| ENSMUSG00000028345 | 5,16E-02  | 5,027275148  | 4,93E-01 | 4,83E-01 | 7,70E-01 | Tex10   | 1,04 | No  |
| ENSMUSG00000028347 | -1,10E-01 | 2,200000434  | 5,82E-01 | 4,46E-01 | 7,37E-01 | Tmeff1  | 0,93 | No  |
| ENSMUSG00000028348 | -3,75E-01 | -0,587033766 | 1,09E+00 | 2,97E-01 | 5,92E-01 | Cavin4  | 0,77 | No  |
| ENSMUSG00000028356 | 1,24E+00  | -2,770611728 | 9,59E-01 | 3,27E-01 | 6,28E-01 | Ambp    | 2,37 | No  |
| ENSMUSG00000028357 | 1,85E+00  | -3,107657832 | 1,35E+00 | 2,46E-01 | 5,50E-01 | Kif12   | 3,61 | No  |
| ENSMUSG00000028358 | -8,95E-01 | 1,306579346  | 2,32E+01 | 1,44E-06 | 6,11E-05 | Zfp618  | 0,54 | Yes |
| ENSMUSG00000028359 | -9,77E-02 | 1,672597187  | 3,63E-01 | 5,47E-01 | 8,14E-01 | Orm3    | 0,93 | No  |
| ENSMUSG00000028360 | 2,97E-01  | -1,800894786 | 2,56E-01 | 6,13E-01 | 8,53E-01 | Slc44a5 | 1,23 | No  |
| ENSMUSG00000028362 | 3,64E-01  | 6,022232665  | 3,09E+01 | 2,77E-08 | 1,74E-06 | Tnfsf8  | 1,29 | Yes |
| ENSMUSG00000028364 | 4,55E-01  | 1,575358009  | 7,20E+00 | 7,27E-03 | 7,38E-02 | Tnc     | 1,37 | No  |
| ENSMUSG00000028367 | -8,53E-02 | 6,878873734  | 1,95E+00 | 1,63E-01 | 5,14E-01 | Txn1    | 0,94 | No  |
| ENSMUSG00000028369 | 3,91E-01  | 0,191305393  | 1,93E+00 | 1,65E-01 | 5,17E-01 | Svep1   | 1,31 | No  |
| ENSMUSG00000028370 | -1,94E+00 | -3,107619243 | 1,50E+00 | 2,21E-01 | 5,50E-01 | Pappa   | 0,26 | No  |
| ENSMUSG00000028378 | 6,62E-02  | 5,399312216  | 8,93E-01 | 3,45E-01 | 6,46E-01 | Ptgr1   | 1,05 | No  |
| ENSMUSG00000028381 | 1,87E-01  | 6,057968027  | 8,29E+00 | 3,99E-03 | 4,73E-02 | Ugcg    | 1,14 | Yes |
| ENSMUSG00000028382 | 1,08E-01  | 8,656768418  | 3,53E+00 | 6,02E-02 | 3,04E-01 | Ptbp3   | 1,08 | No  |
| ENSMUSG00000028383 | -5,46E-02 | 5,02697812   | 5,56E-01 | 4,56E-01 | 7,45E-01 | Hsd12   | 0,96 | No  |
| ENSMUSG00000028385 | 2,14E-01  | 7,298332985  | 1,28E+01 | 3,45E-04 | 6,79E-03 | Snx30   | 1,16 | Yes |
| ENSMUSG00000028386 | -8,14E-01 | -2,65506688  | 3,66E-01 | 5,45E-01 | 8,13E-01 | Slc46a2 | 0,57 | No  |
| ENSMUSG00000028389 | -7,37E-01 | -2,448753987 | 6,08E-01 | 4,35E-01 | 7,28E-01 | Zfp37   | 0,60 | No  |
| ENSMUSG00000028391 | 2,91E-01  | -2,54827754  | 8,63E-02 | 7,69E-01 | 9,42E-01 | Wdr31   | 1,22 | No  |

|                    |           |              |          |          |          |          |      |    |
|--------------------|-----------|--------------|----------|----------|----------|----------|------|----|
| ENSMUSG00000028392 | -9,67E-01 | -1,448653517 | 3,24E+00 | 7,18E-02 | 3,40E-01 | Bspry    | 0,51 | No |
| ENSMUSG00000028393 | 3,13E-01  | 2,358457831  | 5,29E+00 | 2,15E-02 | 1,58E-01 | Alad     | 1,24 | No |
| ENSMUSG00000028394 | -3,40E-02 | 4,964218781  | 2,06E-01 | 6,50E-01 | 8,76E-01 | Pole3    | 0,98 | No |
| ENSMUSG00000028397 | 2,45E-02  | 4,816921495  | 1,02E-01 | 7,49E-01 | 9,31E-01 | Kdm4c    | 1,02 | No |
| ENSMUSG00000028398 | 1,09E-01  | 4,730850122  | 1,95E+00 | 1,62E-01 | 5,12E-01 | Tmem261  | 1,08 | No |
| ENSMUSG00000028399 | -1,71E+00 | -2,655090037 | 2,03E+00 | 1,54E-01 | 4,98E-01 | Ptprd    | 0,31 | No |
| ENSMUSG00000028402 | -2,67E+00 | -2,896062063 | 2,83E+00 | 9,24E-02 | 3,83E-01 | Mpdz     | 0,16 | No |
| ENSMUSG00000028403 | 3,10E-02  | 6,394916047  | 2,40E-01 | 6,24E-01 | 8,59E-01 | Zdhhc21  | 1,02 | No |
| ENSMUSG00000028405 | 7,29E-02  | 6,79870176   | 1,41E+00 | 2,35E-01 | 5,50E-01 | Aco1     | 1,05 | No |
| ENSMUSG00000028407 | -1,41E-01 | 2,633891403  | 1,27E+00 | 2,59E-01 | 5,52E-01 | Toporsos | 0,91 | No |
| ENSMUSG00000028409 | -7,20E-02 | 5,924547435  | 1,19E+00 | 2,75E-01 | 5,72E-01 | Smu1     | 0,95 | No |
| ENSMUSG00000028410 | -7,07E-02 | 5,729073036  | 1,10E+00 | 2,93E-01 | 5,89E-01 | Dnaja1   | 0,95 | No |
| ENSMUSG00000028411 | 1,76E-02  | 3,775417713  | 3,58E-02 | 8,50E-01 | 9,89E-01 | Aptx     | 1,01 | No |
| ENSMUSG00000028412 | -1,83E-01 | 5,920955761  | 7,79E+00 | 5,26E-03 | 5,80E-02 | Slc44a1  | 0,88 | No |
| ENSMUSG00000028413 | 4,41E-02  | 7,617023077  | 5,58E-01 | 4,55E-01 | 7,45E-01 | B4galt1  | 1,03 | No |
| ENSMUSG00000028414 | -1,66E-01 | 3,953303813  | 3,60E+00 | 5,79E-02 | 2,97E-01 | Fktn     | 0,89 | No |
| ENSMUSG00000028415 | 1,20E+00  | -2,711750105 | 8,89E-01 | 3,46E-01 | 6,47E-01 | Spink4   | 2,29 | No |
| ENSMUSG00000028416 | 8,39E-02  | 6,836617567  | 1,87E+00 | 1,71E-01 | 5,28E-01 | Bag1     | 1,06 | No |
| ENSMUSG00000028417 | -2,84E-01 | -1,165701446 | 3,68E-01 | 5,44E-01 | 8,13E-01 | Tal2     | 0,82 | No |
| ENSMUSG00000028419 | -4,69E-02 | 5,862455463  | 5,00E-01 | 4,79E-01 | 7,67E-01 | Chmp5    | 0,97 | No |
| ENSMUSG00000028420 | -7,08E-02 | 4,789220321  | 8,53E-01 | 3,56E-01 | 6,57E-01 | Tmem38b  | 0,95 | No |
| ENSMUSG00000028423 | 8,42E-02  | 6,426416221  | 1,79E+00 | 1,81E-01 | 5,42E-01 | Nfx1     | 1,06 | No |
| ENSMUSG00000028426 | 8,37E-02  | 7,365108295  | 1,97E+00 | 1,61E-01 | 5,09E-01 | Rad23b   | 1,06 | No |
| ENSMUSG00000028427 | -8,16E-02 | -2,226302148 | 1,08E-02 | 9,17E-01 | 1,00E+00 | Aqp7     | 0,95 | No |
| ENSMUSG00000028430 | 5,40E-02  | 6,154876422  | 6,96E-01 | 4,04E-01 | 7,01E-01 | Nol6     | 1,04 | No |
| ENSMUSG00000028431 | 6,66E-02  | 5,062627574  | 8,27E-01 | 3,63E-01 | 6,64E-01 | lkbkap   | 1,05 | No |
| ENSMUSG00000028433 | 5,14E-02  | 6,12295191   | 6,30E-01 | 4,27E-01 | 7,21E-01 | Ubap2    | 1,04 | No |
| ENSMUSG00000028434 | 8,31E-01  | -1,401484279 | 2,38E+00 | 1,23E-01 | 4,38E-01 | Epb41l4b | 1,78 | No |
| ENSMUSG00000028435 | 2,43E-01  | 3,916312331  | 7,14E+00 | 7,54E-03 | 7,58E-02 | Aqp3     | 1,18 | No |
| ENSMUSG00000028436 | 1,46E-01  | 6,289106476  | 5,29E+00 | 2,15E-02 | 1,58E-01 | Dcaf12   | 1,11 | No |
| ENSMUSG00000028437 | 9,29E-03  | 5,755623263  | 1,92E-02 | 8,90E-01 | 1,00E+00 | Ubap1    | 1,01 | No |
| ENSMUSG00000028438 | 2,50E-01  | 3,798379795  | 7,26E+00 | 7,05E-03 | 7,22E-02 | Kif24    | 1,19 | No |

|                    |           |              |          |          |          |               |      |     |
|--------------------|-----------|--------------|----------|----------|----------|---------------|------|-----|
| ENSMUSG00000028439 | 1,07E-01  | 5,449002845  | 2,38E+00 | 1,23E-01 | 4,38E-01 | Fam219a       | 1,08 | No  |
| ENSMUSG00000028441 | 6,17E-01  | -2,548244722 | 4,24E-01 | 5,15E-01 | 7,96E-01 | 1110017D15Rik | 1,53 | No  |
| ENSMUSG00000028443 | -7,89E-02 | 3,882684178  | 7,58E-01 | 3,84E-01 | 6,85E-01 | Nudt2         | 0,95 | No  |
| ENSMUSG00000028444 | 2,63E+00  | -2,96325892  | 2,67E+00 | 1,02E-01 | 3,94E-01 | Cntfr         | 6,19 | No  |
| ENSMUSG00000028445 | 2,12E-01  | -1,070208595 | 2,20E-01 | 6,39E-01 | 8,69E-01 | Enho          | 1,16 | No  |
| ENSMUSG00000028447 | -2,34E-02 | 4,937034954  | 9,77E-02 | 7,55E-01 | 9,34E-01 | Dctn3         | 0,98 | No  |
| ENSMUSG00000028451 | -1,14E-02 | 5,00517951   | 2,37E-02 | 8,78E-01 | 1,00E+00 | 1700022I11Rik | 0,99 | No  |
| ENSMUSG00000028452 | -5,05E-02 | 6,917292495  | 6,87E-01 | 4,07E-01 | 7,04E-01 | Vcp           | 0,97 | No  |
| ENSMUSG00000028453 | 7,18E-02  | 4,599767435  | 8,28E-01 | 3,63E-01 | 6,64E-01 | Fancg         | 1,05 | No  |
| ENSMUSG00000028454 | 5,61E-02  | 4,813665208  | 5,38E-01 | 4,63E-01 | 7,52E-01 | Pigo          | 1,04 | No  |
| ENSMUSG00000028455 | 9,63E-02  | 4,142944709  | 1,25E+00 | 2,63E-01 | 5,57E-01 | Stoml2        | 1,07 | No  |
| ENSMUSG00000028456 | 3,01E-01  | 0,738701671  | 1,67E+00 | 1,96E-01 | 5,50E-01 | Unc13b        | 1,23 | No  |
| ENSMUSG00000028457 | 1,35E+00  | -1,355711307 | 6,03E+00 | 1,41E-02 | 1,20E-01 | Atp8b5        | 2,54 | No  |
| ENSMUSG00000028458 | -5,06E-03 | 5,201139725  | 4,95E-03 | 9,44E-01 | 1,00E+00 | Tesk1         | 1,00 | No  |
| ENSMUSG00000028459 | 1,15E-01  | 5,072534427  | 2,46E+00 | 1,17E-01 | 4,23E-01 | Cd72          | 1,08 | No  |
| ENSMUSG00000028460 | 1,85E+00  | -3,107657832 | 1,35E+00 | 2,46E-01 | 5,50E-01 | Sit1          | 3,61 | No  |
| ENSMUSG00000028461 | 5,62E-02  | 3,172044652  | 2,71E-01 | 6,03E-01 | 8,48E-01 | Ccdc107       | 1,04 | No  |
| ENSMUSG00000028463 | 1,65E-01  | 2,955931295  | 2,08E+00 | 1,50E-01 | 4,91E-01 | Car9          | 1,12 | No  |
| ENSMUSG00000028464 | 4,59E-01  | -0,96337758  | 1,23E+00 | 2,67E-01 | 5,64E-01 | Tpm2          | 1,37 | No  |
| ENSMUSG00000028465 | 7,00E-02  | 9,619418938  | 1,54E+00 | 2,15E-01 | 5,50E-01 | Tln1          | 1,05 | No  |
| ENSMUSG00000028466 | 2,57E-02  | 5,131507069  | 1,26E-01 | 7,23E-01 | 9,17E-01 | Creb3         | 1,02 | No  |
| ENSMUSG00000028467 | 2,64E-02  | 4,3578167    | 1,04E-01 | 7,48E-01 | 9,30E-01 | Gba2          | 1,02 | No  |
| ENSMUSG00000028468 | -5,73E-02 | 5,887165707  | 7,56E-01 | 3,84E-01 | 6,86E-01 | Rgp1          | 0,96 | No  |
| ENSMUSG00000028469 | -9,73E-01 | -1,216022341 | 4,19E+00 | 4,07E-02 | 2,39E-01 | Npr2          | 0,51 | No  |
| ENSMUSG00000028470 | -2,15E-01 | 3,188989085  | 4,03E+00 | 4,48E-02 | 2,52E-01 | Hint2         | 0,86 | No  |
| ENSMUSG00000028476 | -4,51E-01 | 1,124619783  | 5,60E+00 | 1,79E-02 | 1,40E-01 | Reck          | 0,73 | No  |
| ENSMUSG00000028478 | -1,03E-02 | 8,483515868  | 3,23E-02 | 8,57E-01 | 9,94E-01 | Clta          | 0,99 | No  |
| ENSMUSG00000028479 | 1,33E-01  | 4,539792582  | 2,79E+00 | 9,46E-02 | 3,85E-01 | Gne           | 1,10 | No  |
| ENSMUSG00000028480 | -6,26E-01 | 8,203237824  | 1,17E+02 | 3,31E-27 | 1,44E-24 | Glipr2        | 0,65 | Yes |
| ENSMUSG00000028483 | -2,21E-01 | 4,452389476  | 7,52E+00 | 6,10E-03 | 6,49E-02 | Snapc3        | 0,86 | No  |
| ENSMUSG00000028484 | -7,68E-02 | 5,154067585  | 1,14E+00 | 2,86E-01 | 5,82E-01 | Psip1         | 0,95 | No  |
| ENSMUSG00000028487 | -1,87E+00 | -2,963234282 | 1,41E+00 | 2,35E-01 | 5,50E-01 | Bnc2          | 0,27 | No  |

|                    |           |              |           |          |          |               |       |     |
|--------------------|-----------|--------------|-----------|----------|----------|---------------|-------|-----|
| ENSMUSG00000028494 | 1,44E-01  | 7,841433097  | 6,02E+00  | 1,41E-02 | 1,20E-01 | Plin2         | 1,10  | No  |
| ENSMUSG00000028495 | -1,87E-01 | 6,977765935  | 9,44E+00  | 2,13E-03 | 2,94E-02 | Rps6          | 0,88  | Yes |
| ENSMUSG00000028496 | 1,33E-01  | 3,769246604  | 1,97E+00  | 1,61E-01 | 5,09E-01 | Mllt3         | 1,10  | No  |
| ENSMUSG00000028497 | 1,55E-01  | 6,027140198  | 5,63E+00  | 1,77E-02 | 1,39E-01 | Hacd4         | 1,11  | No  |
| ENSMUSG00000028514 | 1,03E-01  | 6,572028953  | 2,72E+00  | 9,88E-02 | 3,91E-01 | Usp24         | 1,07  | No  |
| ENSMUSG00000028517 | -1,21E-01 | 4,172411225  | 2,00E+00  | 1,58E-01 | 5,04E-01 | Plpp3         | 0,92  | No  |
| ENSMUSG00000028518 | 2,56E-01  | 0,028054498  | 7,94E-01  | 3,73E-01 | 6,74E-01 | Prkaa2        | 1,19  | No  |
| ENSMUSG00000028519 | -1,92E+00 | -3,0336536   | 1,46E+00  | 2,27E-01 | 5,50E-01 | Dab1          | 0,26  | No  |
| ENSMUSG00000028520 | -3,83E-02 | -3,107651936 | -7,91E-11 | 1,00E+00 | 1,00E+00 | 4921539E11Rik | 0,97  | No  |
| ENSMUSG00000028521 | 1,26E-01  | 3,897969692  | 1,93E+00  | 1,64E-01 | 5,16E-01 | Slc35d1       | 1,09  | No  |
| ENSMUSG00000028522 | -6,04E-02 | 6,11674446   | 8,72E-01  | 3,50E-01 | 6,52E-01 | Mier1         | 0,96  | No  |
| ENSMUSG00000028524 | 8,54E-01  | -0,529129161 | 5,20E+00  | 2,26E-02 | 1,64E-01 | Sgip1         | 1,81  | No  |
| ENSMUSG00000028525 | -8,83E-01 | 6,846172553  | 2,04E+02  | 3,50E-46 | 6,56E-43 | Pde4b         | 0,54  | Yes |
| ENSMUSG00000028527 | 4,21E-01  | 3,920454886  | 2,13E+01  | 3,94E-06 | 1,48E-04 | Ak4           | 1,34  | Yes |
| ENSMUSG00000028528 | 8,32E-01  | -2,268148767 | 8,33E-01  | 3,61E-01 | 6,63E-01 | Dnajc6        | 1,78  | No  |
| ENSMUSG00000028530 | -5,39E-02 | 8,068386841  | 8,62E-01  | 3,53E-01 | 6,54E-01 | Jak1          | 0,96  | No  |
| ENSMUSG00000028532 | 3,48E+00  | -2,896200697 | 5,25E+00  | 2,19E-02 | 1,60E-01 | Cachd1        | 11,17 | No  |
| ENSMUSG00000028536 | 3,14E-02  | -3,107617333 | -7,69E-10 | 1,00E+00 | 1,00E+00 | 2610528J11Rik | 1,02  | No  |
| ENSMUSG00000028538 | -3,49E-01 | 5,40430471   | 2,50E+01  | 5,72E-07 | 2,70E-05 | St3gal3       | 0,78  | Yes |
| ENSMUSG00000028539 | 5,00E-01  | -0,641508401 | 1,63E+00  | 2,02E-01 | 5,50E-01 | Artn          | 1,41  | No  |
| ENSMUSG00000028540 | 1,87E-01  | 3,185540019  | 3,08E+00  | 7,93E-02 | 3,60E-01 | Dph2          | 1,14  | No  |
| ENSMUSG00000028541 | 1,49E-01  | -1,535456199 | 7,21E-02  | 7,88E-01 | 9,53E-01 | B4galt2       | 1,11  | No  |
| ENSMUSG00000028542 | 2,67E-01  | -0,621024354 | 5,44E-01  | 4,61E-01 | 7,49E-01 | Slc6a9        | 1,20  | No  |
| ENSMUSG00000028544 | 1,87E+00  | -3,107639691 | 1,38E+00  | 2,40E-01 | 5,50E-01 | Slc5a9        | 3,67  | No  |
| ENSMUSG00000028545 | -2,68E+00 | -2,963253845 | 2,85E+00  | 9,15E-02 | 3,82E-01 | Bend5         | 0,16  | No  |
| ENSMUSG00000028546 | -4,44E-01 | -2,185624361 | 3,63E-01  | 5,47E-01 | 8,14E-01 | Elavl4        | 0,73  | No  |
| ENSMUSG00000028549 | 1,96E-01  | 2,186974516  | 1,86E+00  | 1,72E-01 | 5,29E-01 | Itgb3bp       | 1,15  | No  |
| ENSMUSG00000028550 | 6,37E-02  | 4,058335587  | 5,32E-01  | 4,66E-01 | 7,54E-01 | Atg4c         | 1,05  | No  |
| ENSMUSG00000028551 | 1,68E-01  | 5,051762519  | 5,24E+00  | 2,21E-02 | 1,61E-01 | Cdkn2c        | 1,12  | No  |
| ENSMUSG00000028552 | -4,93E-02 | 6,81098522   | 6,47E-01  | 4,21E-01 | 7,16E-01 | Eps15         | 0,97  | No  |
| ENSMUSG00000028553 | -2,14E-01 | 0,229219762  | 5,73E-01  | 4,49E-01 | 7,39E-01 | Angptl3       | 0,86  | No  |
| ENSMUSG00000028555 | -4,96E-01 | 3,25290632   | 2,26E+01  | 1,95E-06 | 7,95E-05 | Ttc39a        | 0,71  | Yes |

|                    |           |              |           |          |          |               |      |     |
|--------------------|-----------|--------------|-----------|----------|----------|---------------|------|-----|
| ENSMUSG00000028556 | 3,70E-02  | 6,2575105    | 3,35E-01  | 5,63E-01 | 8,26E-01 | Dock7         | 1,03 | No  |
| ENSMUSG00000028557 | -8,68E-02 | 5,944515979  | 1,75E+00  | 1,86E-01 | 5,50E-01 | Rnf11         | 0,94 | No  |
| ENSMUSG00000028558 | -6,05E-01 | -2,401366734 | 4,99E-01  | 4,80E-01 | 7,68E-01 | Calr4         | 0,66 | No  |
| ENSMUSG00000028559 | -9,25E-02 | 6,378518982  | 2,13E+00  | 1,45E-01 | 4,81E-01 | Osbpl9        | 0,94 | No  |
| ENSMUSG00000028560 | 1,17E-01  | 6,145175586  | 3,28E+00  | 7,02E-02 | 3,35E-01 | Usp1          | 1,08 | No  |
| ENSMUSG00000028563 | 1,97E-01  | 2,006276922  | 1,65E+00  | 1,98E-01 | 5,50E-01 | Tm2d1         | 1,15 | No  |
| ENSMUSG00000028565 | 2,26E-01  | 0,454797422  | 8,24E-01  | 3,64E-01 | 6,65E-01 | Nfia          | 1,17 | No  |
| ENSMUSG00000028567 | -1,57E-03 | 4,957847999  | 4,42E-04  | 9,83E-01 | 1,00E+00 | Txndc12       | 1,00 | No  |
| ENSMUSG00000028568 | -5,79E-02 | 4,039344635  | 4,21E-01  | 5,16E-01 | 7,97E-01 | Btf3l4        | 0,96 | No  |
| ENSMUSG00000028572 | -4,56E-01 | 4,341861704  | 3,05E+01  | 3,31E-08 | 2,04E-06 | Hook1         | 0,73 | Yes |
| ENSMUSG00000028573 | -1,07E-01 | 3,319601081  | 1,07E+00  | 3,00E-01 | 5,96E-01 | Fggy          | 0,93 | No  |
| ENSMUSG00000028575 | -7,54E-01 | -0,424768762 | 4,83E+00  | 2,80E-02 | 1,89E-01 | Eqtn          | 0,59 | No  |
| ENSMUSG00000028576 | 2,61E-01  | 1,418409864  | 2,14E+00  | 1,44E-01 | 4,80E-01 | lft74         | 1,20 | No  |
| ENSMUSG00000028577 | -7,36E-02 | 6,227963844  | 1,32E+00  | 2,51E-01 | 5,50E-01 | Plaa          | 0,95 | No  |
| ENSMUSG00000028578 | 1,11E-01  | 3,166909383  | 1,08E+00  | 2,99E-01 | 5,95E-01 | Caap1         | 1,08 | No  |
| ENSMUSG00000028580 | 6,32E-02  | 6,353763183  | 9,93E-01  | 3,19E-01 | 6,20E-01 | Pum1          | 1,04 | No  |
| ENSMUSG00000028581 | 4,71E-02  | 10,67894183  | 7,07E-01  | 4,00E-01 | 6,99E-01 | Laptm5        | 1,03 | No  |
| ENSMUSG00000028582 | 5,72E-02  | 5,758601005  | 7,26E-01  | 3,94E-01 | 6,94E-01 | Cc2d1b        | 1,04 | No  |
| ENSMUSG00000028583 | 4,62E-01  | 6,059444206  | 4,96E+01  | 1,90E-12 | 2,22E-10 | Pdpn          | 1,38 | Yes |
| ENSMUSG00000028587 | 6,73E-02  | 2,860731437  | 3,28E-01  | 5,67E-01 | 8,29E-01 | Orc1          | 1,05 | No  |
| ENSMUSG00000028597 | -6,25E-01 | -1,088720183 | 1,98E+00  | 1,59E-01 | 5,07E-01 | Gpx7          | 0,65 | No  |
| ENSMUSG00000028599 | 1,66E-01  | 8,907360816  | 8,51E+00  | 3,54E-03 | 4,32E-02 | Tnfrsf1b      | 1,12 | Yes |
| ENSMUSG00000028600 | 1,13E+00  | -2,548192458 | 1,22E+00  | 2,69E-01 | 5,65E-01 | Podn          | 2,19 | No  |
| ENSMUSG00000028601 | -7,81E-02 | -2,600766637 | 5,55E-03  | 9,41E-01 | 1,00E+00 | Echdc2        | 0,95 | No  |
| ENSMUSG00000028602 | 5,49E-01  | 2,299852224  | 1,57E+01  | 7,47E-05 | 1,90E-03 | Tnfrsf8       | 1,46 | Yes |
| ENSMUSG00000028603 | 2,33E-02  | 5,983435961  | 1,27E-01  | 7,22E-01 | 9,16E-01 | Scp2          | 1,02 | No  |
| ENSMUSG00000028607 | 8,84E-02  | 4,404982841  | 1,17E+00  | 2,79E-01 | 5,75E-01 | Cpt2          | 1,06 | No  |
| ENSMUSG00000028608 | 7,06E-02  | 3,804730443  | 5,82E-01  | 4,45E-01 | 7,36E-01 | 0610037L13Rik | 1,05 | No  |
| ENSMUSG00000028609 | -2,46E-02 | 4,322912077  | 8,77E-02  | 7,67E-01 | 9,40E-01 | Magoh         | 0,98 | No  |
| ENSMUSG00000028612 | 4,24E-02  | -3,033592245 | -1,17E-09 | 1,00E+00 | 1,00E+00 | Lrp8os1       | 1,03 | No  |
| ENSMUSG00000028613 | 3,30E-01  | 4,644530103  | 1,71E+01  | 3,61E-05 | 1,03E-03 | Lrp8          | 1,26 | Yes |
| ENSMUSG00000028614 | 1,51E-01  | 5,329227366  | 4,56E+00  | 3,28E-02 | 2,12E-01 | Ndc1          | 1,11 | No  |

|                    |           |              |          |          |          |         |      |     |
|--------------------|-----------|--------------|----------|----------|----------|---------|------|-----|
| ENSMUSG00000028617 | 2,38E-02  | 4,414336781  | 8,46E-02 | 7,71E-01 | 9,43E-01 | Lrrc42  | 1,02 | No  |
| ENSMUSG00000028618 | -1,57E-02 | 6,592035634  | 6,32E-02 | 8,02E-01 | 9,61E-01 | Tmem59  | 0,99 | No  |
| ENSMUSG00000028619 | 1,72E-01  | 4,985886556  | 5,42E+00 | 1,99E-02 | 1,51E-01 | Tceanc2 | 1,13 | No  |
| ENSMUSG00000028621 | 1,73E-01  | 2,407485276  | 1,68E+00 | 1,95E-01 | 5,50E-01 | Cyb5rl  | 1,13 | No  |
| ENSMUSG00000028622 | 7,17E-02  | 5,362768256  | 1,03E+00 | 3,09E-01 | 6,07E-01 | Mrpl37  | 1,05 | No  |
| ENSMUSG00000028626 | -1,20E+00 | -1,65512432  | 4,37E+00 | 3,65E-02 | 2,27E-01 | Col9a2  | 0,44 | No  |
| ENSMUSG00000028629 | 2,55E-01  | 3,834957571  | 8,04E+00 | 4,56E-03 | 5,21E-02 | Exo5    | 1,19 | No  |
| ENSMUSG00000028630 | -1,40E-02 | 5,416844527  | 3,99E-02 | 8,42E-01 | 9,85E-01 | Dyrk2   | 0,99 | No  |
| ENSMUSG00000028631 | -1,89E+00 | -3,1076441   | 1,42E+00 | 2,33E-01 | 5,50E-01 | Kcnq4   | 0,27 | No  |
| ENSMUSG00000028633 | 1,94E-01  | 3,189859915  | 3,13E+00 | 7,69E-02 | 3,54E-01 | Ctps    | 1,14 | No  |
| ENSMUSG00000028634 | 8,36E-02  | 5,2683709    | 1,36E+00 | 2,44E-01 | 5,50E-01 | Hivep3  | 1,06 | No  |
| ENSMUSG00000028636 | 1,34E-02  | 2,394398558  | 1,04E-02 | 9,19E-01 | 1,00E+00 | Ppcs    | 1,01 | No  |
| ENSMUSG00000028637 | -8,70E-01 | -2,896137506 | 4,16E-01 | 5,19E-01 | 7,98E-01 | Ccdc30  | 0,55 | No  |
| ENSMUSG00000028639 | 4,75E-02  | 8,593150175  | 6,86E-01 | 4,08E-01 | 7,04E-01 | Ybx1    | 1,03 | No  |
| ENSMUSG00000028640 | -2,68E+00 | -3,033645766 | 2,84E+00 | 9,17E-02 | 3,82E-01 | Tfap2c  | 0,16 | No  |
| ENSMUSG00000028641 | 2,30E-01  | 3,898842933  | 6,35E+00 | 1,17E-02 | 1,05E-01 | P3h1    | 1,17 | No  |
| ENSMUSG00000028642 | 2,04E-01  | -2,355607365 | 5,75E-02 | 8,10E-01 | 9,66E-01 | Tmem269 | 1,15 | No  |
| ENSMUSG00000028643 | 5,72E-03  | 3,945349399  | 4,01E-03 | 9,50E-01 | 1,00E+00 | Svbp    | 1,00 | No  |
| ENSMUSG00000028644 | -4,40E-01 | -2,497595259 | 1,98E-01 | 6,56E-01 | 8,80E-01 | Ermap   | 0,74 | No  |
| ENSMUSG00000028645 | 1,65E-01  | 7,530417908  | 7,72E+00 | 5,47E-03 | 5,97E-02 | Slc2a1  | 1,12 | No  |
| ENSMUSG00000028646 | 7,75E-02  | 7,712758809  | 1,74E+00 | 1,88E-01 | 5,50E-01 | Rragc   | 1,06 | No  |
| ENSMUSG00000028647 | 1,10E-01  | 2,970877544  | 9,35E-01 | 3,34E-01 | 6,34E-01 | Mycbp   | 1,08 | No  |
| ENSMUSG00000028648 | 3,57E-02  | 3,403845155  | 1,23E-01 | 7,26E-01 | 9,18E-01 | Ndufs5  | 1,03 | No  |
| ENSMUSG00000028649 | 1,53E-01  | 8,774295302  | 7,21E+00 | 7,24E-03 | 7,37E-02 | Macf1   | 1,11 | No  |
| ENSMUSG00000028651 | 3,84E-02  | 3,789937985  | 1,72E-01 | 6,78E-01 | 8,92E-01 | Ppie    | 1,03 | No  |
| ENSMUSG00000028653 | 2,31E-01  | 3,605284159  | 5,81E+00 | 1,59E-02 | 1,31E-01 | Trit1   | 1,17 | No  |
| ENSMUSG00000028654 | -4,70E-01 | 5,533666759  | 4,75E+01 | 5,44E-12 | 6,11E-10 | Mycl    | 0,72 | Yes |
| ENSMUSG00000028655 | 3,28E-01  | 3,39481134   | 1,04E+01 | 1,26E-03 | 1,96E-02 | Mfsd2a  | 1,26 | Yes |
| ENSMUSG00000028656 | 5,00E-03  | 9,224146541  | 7,79E-03 | 9,30E-01 | 1,00E+00 | Cap1    | 1,00 | No  |
| ENSMUSG00000028657 | 2,76E-01  | 7,02479002   | 2,07E+01 | 5,45E-06 | 1,95E-04 | Ppt1    | 1,21 | Yes |
| ENSMUSG00000028661 | 2,63E+00  | -2,831994022 | 2,67E+00 | 1,02E-01 | 3,95E-01 | Epha8   | 6,18 | No  |
| ENSMUSG00000028664 | -1,21E+00 | -2,401373792 | 1,91E+00 | 1,67E-01 | 5,20E-01 | Ephb2   | 0,43 | No  |



|                    |           |              |          |          |          |         |      |     |
|--------------------|-----------|--------------|----------|----------|----------|---------|------|-----|
| ENSMUSG00000028668 | 4,19E-02  | 7,176278513  | 4,87E-01 | 4,85E-01 | 7,73E-01 | Eloa    | 1,03 | No  |
| ENSMUSG00000028669 | -6,60E-02 | 4,63965502   | 7,15E-01 | 3,98E-01 | 6,98E-01 | Pithd1  | 0,96 | No  |
| ENSMUSG00000028670 | 8,78E-02  | 6,350664131  | 1,91E+00 | 1,66E-01 | 5,19E-01 | Lypla2  | 1,06 | No  |
| ENSMUSG00000028671 | 1,95E-01  | 4,252448118  | 5,31E+00 | 2,12E-02 | 1,57E-01 | Gale    | 1,14 | No  |
| ENSMUSG00000028672 | 1,17E-01  | 5,322827963  | 2,74E+00 | 9,79E-02 | 3,91E-01 | Hmgcl   | 1,08 | No  |
| ENSMUSG00000028673 | -1,15E-01 | 7,562945138  | 3,79E+00 | 5,16E-02 | 2,77E-01 | Fuca1   | 0,92 | No  |
| ENSMUSG00000028675 | -1,96E-02 | 6,408156855  | 9,72E-02 | 7,55E-01 | 9,34E-01 | Pnrc2   | 0,99 | No  |
| ENSMUSG00000028676 | -9,61E-02 | 6,533838375  | 2,37E+00 | 1,24E-01 | 4,40E-01 | Srsf10  | 0,94 | No  |
| ENSMUSG00000028677 | 1,53E-02  | 5,581330742  | 5,01E-02 | 8,23E-01 | 9,73E-01 | Rnf220  | 1,01 | No  |
| ENSMUSG00000028678 | 3,72E-01  | 4,014930473  | 1,81E+01 | 2,15E-05 | 6,64E-04 | Kif2c   | 1,29 | Yes |
| ENSMUSG00000028680 | 1,79E-01  | 5,960019001  | 7,11E+00 | 7,65E-03 | 7,65E-02 | Plk3    | 1,13 | No  |
| ENSMUSG00000028681 | -2,69E+00 | -2,448627672 | 2,87E+00 | 9,03E-02 | 3,81E-01 | Ptch2   | 0,16 | No  |
| ENSMUSG00000028683 | 5,21E-02  | 3,282537979  | 2,43E-01 | 6,22E-01 | 8,58E-01 | Eif2b3  | 1,04 | No  |
| ENSMUSG00000028684 | 5,44E-02  | 4,107776859  | 3,92E-01 | 5,31E-01 | 8,05E-01 | Urod    | 1,04 | No  |
| ENSMUSG00000028687 | 1,07E-01  | 1,566109973  | 3,72E-01 | 5,42E-01 | 8,12E-01 | Mutyh   | 1,08 | No  |
| ENSMUSG00000028688 | -2,82E-03 | 3,880268465  | 9,62E-04 | 9,75E-01 | 1,00E+00 | Toe1    | 1,00 | No  |
| ENSMUSG00000028689 | -1,16E-01 | 3,675735944  | 1,50E+00 | 2,20E-01 | 5,50E-01 | Ccdc163 | 0,92 | No  |
| ENSMUSG00000028690 | 6,60E-02  | 3,251830527  | 3,96E-01 | 5,29E-01 | 8,05E-01 | Mmachc  | 1,05 | No  |
| ENSMUSG00000028691 | -6,54E-03 | 8,361693207  | 1,29E-02 | 9,10E-01 | 1,00E+00 | Prdx1   | 1,00 | No  |
| ENSMUSG00000028692 | 6,13E-02  | 9,88104623   | 1,19E+00 | 2,76E-01 | 5,73E-01 | Akr1a1  | 1,04 | No  |
| ENSMUSG00000028693 | 1,82E-01  | 5,247236128  | 6,46E+00 | 1,10E-02 | 1,00E-01 | Nasp    | 1,13 | No  |
| ENSMUSG00000028696 | 8,59E-02  | 2,848816888  | 5,34E-01 | 4,65E-01 | 7,54E-01 | Ipp     | 1,06 | No  |
| ENSMUSG00000028698 | -3,83E-01 | 2,580329894  | 9,48E+00 | 2,08E-03 | 2,89E-02 | Pik3r3  | 0,77 | Yes |
| ENSMUSG00000028699 | 2,57E+00  | -3,0336723   | 2,56E+00 | 1,10E-01 | 4,06E-01 | Tspan1  | 5,96 | No  |
| ENSMUSG00000028700 | 7,40E-02  | 4,072831891  | 7,11E-01 | 3,99E-01 | 6,98E-01 | Pomgnt1 | 1,05 | No  |
| ENSMUSG00000028701 | 4,54E-02  | 0,554332813  | 3,73E-02 | 8,47E-01 | 9,87E-01 | Lurap1  | 1,03 | No  |
| ENSMUSG00000028702 | 7,37E-03  | 5,269179451  | 1,08E-02 | 9,17E-01 | 1,00E+00 | Rad54l  | 1,01 | No  |
| ENSMUSG00000028703 | 2,73E-02  | 5,674329986  | 1,64E-01 | 6,86E-01 | 8,97E-01 | Lrrc41  | 1,02 | No  |
| ENSMUSG00000028706 | -3,05E-01 | 4,194501461  | 1,32E+01 | 2,82E-04 | 5,77E-03 | Nsun4   | 0,81 | Yes |
| ENSMUSG00000028707 | -1,87E+00 | -3,107637761 | 1,39E+00 | 2,38E-01 | 5,50E-01 | Dmbx1   | 0,27 | No  |
| ENSMUSG00000028708 | 1,20E-01  | 6,297809814  | 3,57E+00 | 5,88E-02 | 3,00E-01 | Mknk1   | 1,09 | No  |
| ENSMUSG00000028709 | 1,39E-01  | 3,981011983  | 2,45E+00 | 1,18E-01 | 4,25E-01 | Mob3c   | 1,10 | No  |

|                    |           |              |          |          |          |          |      |    |
|--------------------|-----------|--------------|----------|----------|----------|----------|------|----|
| ENSMUSG00000028710 | 5,76E-02  | 3,281396656  | 3,02E-01 | 5,82E-01 | 8,38E-01 | Atpaf1   | 1,04 | No |
| ENSMUSG00000028712 | -1,87E+00 | -3,107637761 | 1,39E+00 | 2,38E-01 | 5,50E-01 | Cyp4a31  | 0,27 | No |
| ENSMUSG00000028715 | 2,64E+00  | -3,033673223 | 2,69E+00 | 1,01E-01 | 3,92E-01 | Cyp4a14  | 6,23 | No |
| ENSMUSG00000028716 | -2,02E-01 | 3,98674627   | 5,30E+00 | 2,14E-02 | 1,58E-01 | Pdzk1ip1 | 0,87 | No |
| ENSMUSG00000028717 | 3,05E-02  | 5,094409406  | 1,77E-01 | 6,74E-01 | 8,90E-01 | Tal1     | 1,02 | No |
| ENSMUSG00000028718 | 2,09E-01  | 4,885274765  | 7,52E+00 | 6,10E-03 | 6,49E-02 | Stil     | 1,16 | No |
| ENSMUSG00000028719 | 2,25E-02  | 6,686498188  | 1,32E-01 | 7,16E-01 | 9,13E-01 | Cmpk1    | 1,02 | No |
| ENSMUSG00000028729 | -1,07E-01 | 4,97081188   | 2,05E+00 | 1,52E-01 | 4,94E-01 | Ebna1bp2 | 0,93 | No |
| ENSMUSG00000028730 | 7,32E-01  | -2,770588265 | 2,92E-01 | 5,89E-01 | 8,41E-01 | Cfap57   | 1,66 | No |
| ENSMUSG00000028737 | 3,78E-02  | 4,516905498  | 2,24E-01 | 6,36E-01 | 8,67E-01 | Aldh4a1  | 1,03 | No |
| ENSMUSG00000028738 | 1,86E+00  | -3,033646451 | 1,35E+00 | 2,46E-01 | 5,50E-01 | Tas1r2   | 3,62 | No |
| ENSMUSG00000028741 | -1,39E-01 | 4,001151073  | 2,40E+00 | 1,22E-01 | 4,35E-01 | Mrto4    | 0,91 | No |
| ENSMUSG00000028743 | 8,78E-02  | 4,791276781  | 1,34E+00 | 2,47E-01 | 5,50E-01 | Akr7a5   | 1,06 | No |
| ENSMUSG00000028744 | 1,28E-01  | 4,272375349  | 2,36E+00 | 1,24E-01 | 4,41E-01 | Pqlc2    | 1,09 | No |
| ENSMUSG00000028745 | -2,28E-02 | 8,521594262  | 1,58E-01 | 6,91E-01 | 9,00E-01 | Capzb    | 0,98 | No |
| ENSMUSG00000028751 | -2,30E-01 | -1,831974361 | 1,17E-01 | 7,32E-01 | 9,22E-01 | Pla2g2e  | 0,85 | No |
| ENSMUSG00000028753 | 1,87E+00  | -3,107639691 | 1,38E+00 | 2,40E-01 | 5,50E-01 | Vwa5b1   | 3,67 | No |
| ENSMUSG00000028755 | -7,94E-01 | -2,401357693 | 9,16E-01 | 3,39E-01 | 6,39E-01 | Cda      | 0,58 | No |
| ENSMUSG00000028756 | -5,49E-02 | 5,494441894  | 6,34E-01 | 4,26E-01 | 7,20E-01 | Pink1    | 0,96 | No |
| ENSMUSG00000028757 | 9,07E-02  | 7,210696612  | 2,28E+00 | 1,31E-01 | 4,55E-01 | Ddost    | 1,06 | No |
| ENSMUSG00000028758 | -3,47E-01 | -1,355517475 | 3,85E-01 | 5,35E-01 | 8,07E-01 | Kif17    | 0,79 | No |
| ENSMUSG00000028759 | -2,18E-02 | 7,372094894  | 1,34E-01 | 7,15E-01 | 9,12E-01 | Hp1bp3   | 0,99 | No |
| ENSMUSG00000028760 | 7,45E-03  | 6,987030859  | 1,50E-02 | 9,02E-01 | 1,00E+00 | Eif4g3   | 1,01 | No |
| ENSMUSG00000028763 | -2,28E-01 | 0,477507126  | 8,82E-01 | 3,48E-01 | 6,49E-01 | Hspg2    | 0,85 | No |
| ENSMUSG00000028766 | -3,88E+00 | -2,548257857 | 7,22E+00 | 7,20E-03 | 7,34E-02 | Alpl     | 0,07 | No |
| ENSMUSG00000028771 | 6,43E-02  | 7,264567859  | 1,15E+00 | 2,85E-01 | 5,81E-01 | Ptpn12   | 1,05 | No |
| ENSMUSG00000028772 | 7,64E-02  | 4,621492454  | 9,43E-01 | 3,32E-01 | 6,32E-01 | Zcchc17  | 1,05 | No |
| ENSMUSG00000028773 | -1,36E-01 | -0,763086211 | 1,12E-01 | 7,38E-01 | 9,26E-01 | Fabp3    | 0,91 | No |
| ENSMUSG00000028776 | -3,59E+00 | -2,770545444 | 5,79E+00 | 1,61E-02 | 1,32E-01 | Tinag1   | 0,08 | No |
| ENSMUSG00000028777 | -1,65E-01 | -1,35546962  | 8,55E-02 | 7,70E-01 | 9,42E-01 | Gnat3    | 0,89 | No |
| ENSMUSG00000028778 | -1,96E+00 | -2,896145386 | 1,50E+00 | 2,21E-01 | 5,50E-01 | Hcrtr1   | 0,26 | No |
| ENSMUSG00000028779 | 2,68E-02  | 5,973766158  | 1,67E-01 | 6,83E-01 | 8,95E-01 | Pef1     | 1,02 | No |

|                    |           |              |          |          |          |          |      |     |
|--------------------|-----------|--------------|----------|----------|----------|----------|------|-----|
| ENSMUSG00000028780 | -9,80E-01 | -2,401330208 | 1,16E+00 | 2,81E-01 | 5,77E-01 | Sema3c   | 0,51 | No  |
| ENSMUSG00000028782 | -1,48E+00 | -2,268049272 | 2,26E+00 | 1,33E-01 | 4,59E-01 | Adgrb2   | 0,36 | No  |
| ENSMUSG00000028784 | -4,80E-02 | -2,89615251  | 1,06E-03 | 9,74E-01 | 1,00E+00 | Spocd1   | 0,97 | No  |
| ENSMUSG00000028785 | -1,01E+00 | -2,355499655 | 1,22E+00 | 2,69E-01 | 5,65E-01 | Hpca     | 0,50 | No  |
| ENSMUSG00000028788 | -3,59E-02 | 8,307778158  | 3,87E-01 | 5,34E-01 | 8,07E-01 | Ptp4a2   | 0,98 | No  |
| ENSMUSG00000028789 | -1,28E+00 | 1,188235728  | 4,24E+01 | 7,50E-11 | 7,23E-09 | Azin2    | 0,41 | Yes |
| ENSMUSG00000028790 | 6,36E-02  | 7,295319998  | 1,13E+00 | 2,87E-01 | 5,83E-01 | Khdrbs1  | 1,05 | No  |
| ENSMUSG00000028792 | -2,08E-01 | 6,65446151   | 1,13E+01 | 7,91E-04 | 1,33E-02 | Ak2      | 0,87 | Yes |
| ENSMUSG00000028793 | -5,86E-01 | 7,414406947  | 9,67E+01 | 8,01E-23 | 2,42E-20 | Rnf19b   | 0,67 | Yes |
| ENSMUSG00000028794 | -3,18E-01 | 0,920677438  | 2,17E+00 | 1,41E-01 | 4,75E-01 | A3galt2  | 0,80 | No  |
| ENSMUSG00000028795 | -4,37E-02 | 3,427594735  | 1,94E-01 | 6,60E-01 | 8,82E-01 | Ccdc28b  | 0,97 | No  |
| ENSMUSG00000028796 | -1,68E-01 | 6,967476745  | 7,59E+00 | 5,87E-03 | 6,31E-02 | Phc2     | 0,89 | No  |
| ENSMUSG00000028797 | -6,85E-02 | 6,80802859   | 1,24E+00 | 2,65E-01 | 5,60E-01 | Tmem234  | 0,95 | No  |
| ENSMUSG00000028798 | -1,20E-01 | 5,794402729  | 3,23E+00 | 7,25E-02 | 3,41E-01 | Eif3i    | 0,92 | No  |
| ENSMUSG00000028799 | -2,42E-01 | 4,98511091   | 1,07E+01 | 1,06E-03 | 1,69E-02 | Zfp362   | 0,85 | Yes |
| ENSMUSG00000028800 | -1,22E-01 | 4,92504535   | 2,66E+00 | 1,03E-01 | 3,95E-01 | Hdac1    | 0,92 | No  |
| ENSMUSG00000028801 | -1,57E-01 | -2,126700633 | 4,43E-02 | 8,33E-01 | 9,79E-01 | Stpg1    | 0,90 | No  |
| ENSMUSG00000028803 | 7,03E-02  | 5,713652592  | 1,09E+00 | 2,95E-01 | 5,91E-01 | Nipal3   | 1,05 | No  |
| ENSMUSG00000028804 | -1,77E+00 | -2,600685171 | 2,18E+00 | 1,40E-01 | 4,73E-01 | Csmd2    | 0,29 | No  |
| ENSMUSG00000028807 | 3,06E-01  | 2,54017614   | 5,78E+00 | 1,62E-02 | 1,32E-01 | Zbtb8a   | 1,24 | No  |
| ENSMUSG00000028809 | -3,66E-02 | 7,255637922  | 3,73E-01 | 5,41E-01 | 8,11E-01 | Srrm1    | 0,97 | No  |
| ENSMUSG00000028811 | 2,57E-02  | 5,64176713   | 1,42E-01 | 7,06E-01 | 9,08E-01 | Yars     | 1,02 | No  |
| ENSMUSG00000028820 | 5,49E-02  | 7,977741352  | 8,90E-01 | 3,45E-01 | 6,46E-01 | Sfpq     | 1,04 | No  |
| ENSMUSG00000028821 | -2,86E-02 | 5,716112826  | 1,80E-01 | 6,71E-01 | 8,89E-01 | Syf2     | 0,98 | No  |
| ENSMUSG00000028822 | 9,36E-02  | 7,082458673  | 2,39E+00 | 1,22E-01 | 4,36E-01 | Tmem50a  | 1,07 | No  |
| ENSMUSG00000028825 | 1,06E-01  | -1,998059314 | 2,49E-02 | 8,75E-01 | 1,00E+00 | Rhd      | 1,08 | No  |
| ENSMUSG00000028826 | -1,47E-02 | 6,372771506  | 5,42E-02 | 8,16E-01 | 9,69E-01 | Tmem57   | 0,99 | No  |
| ENSMUSG00000028830 | 7,63E-03  | 5,590648917  | 1,24E-02 | 9,11E-01 | 1,00E+00 | AU040320 | 1,01 | No  |
| ENSMUSG00000028832 | 1,92E-01  | 5,767073075  | 8,14E+00 | 4,32E-03 | 5,01E-02 | Stmn1    | 1,14 | No  |
| ENSMUSG00000028833 | 9,04E-02  | 5,740048623  | 1,80E+00 | 1,80E-01 | 5,41E-01 | Ncdn     | 1,06 | No  |
| ENSMUSG00000028834 | -3,16E+00 | -2,963246013 | 4,20E+00 | 4,04E-02 | 2,38E-01 | Trim63   | 0,11 | No  |
| ENSMUSG00000028836 | -8,72E-01 | -2,185589888 | 1,37E+00 | 2,43E-01 | 5,50E-01 | Slc30a2  | 0,55 | No  |

|                    |           |              |          |          |          |          |      |     |
|--------------------|-----------|--------------|----------|----------|----------|----------|------|-----|
| ENSMUSG00000028837 | -1,31E-02 | 6,183072572  | 4,12E-02 | 8,39E-01 | 9,83E-01 | Psmb2    | 0,99 | No  |
| ENSMUSG00000028838 | -9,43E-01 | 2,17100838   | 4,43E+01 | 2,81E-11 | 2,85E-09 | Extl1    | 0,52 | Yes |
| ENSMUSG00000028840 | -6,44E-02 | 2,734808866  | 2,72E-01 | 6,02E-01 | 8,48E-01 | Zfp593   | 0,96 | No  |
| ENSMUSG00000028841 | 1,21E-02  | -3,033650469 | 7,34E-11 | 1,00E+00 | 1,00E+00 | Cnksr1   | 1,01 | No  |
| ENSMUSG00000028842 | -1,14E-02 | 5,635295537  | 2,80E-02 | 8,67E-01 | 9,99E-01 | Ago3     | 0,99 | No  |
| ENSMUSG00000028843 | 1,28E-02  | 9,209617496  | 5,06E-02 | 8,22E-01 | 9,72E-01 | Sh3bgrl3 | 1,01 | No  |
| ENSMUSG00000028845 | 6,11E-01  | -0,655125628 | 2,51E+00 | 1,13E-01 | 4,14E-01 | Tekt2    | 1,53 | No  |
| ENSMUSG00000028847 | -8,46E-02 | 5,96246271   | 1,66E+00 | 1,98E-01 | 5,50E-01 | Trappc3  | 0,94 | No  |
| ENSMUSG00000028848 | 1,09E-02  | 4,062379276  | 1,54E-02 | 9,01E-01 | 1,00E+00 | Gpn2     | 1,01 | No  |
| ENSMUSG00000028849 | 1,68E-01  | 7,417500715  | 7,95E+00 | 4,81E-03 | 5,43E-02 | Map7d1   | 1,12 | No  |
| ENSMUSG00000028850 | 5,48E-02  | 3,93368639   | 3,66E-01 | 5,45E-01 | 8,13E-01 | Gpatch3  | 1,04 | No  |
| ENSMUSG00000028851 | 9,78E-02  | 5,57978659   | 2,02E+00 | 1,55E-01 | 4,99E-01 | Nudc     | 1,07 | No  |
| ENSMUSG00000028854 | 1,49E-01  | 6,528829313  | 5,64E+00 | 1,75E-02 | 1,38E-01 | Slc9a1   | 1,11 | No  |
| ENSMUSG00000028857 | 3,19E-02  | 5,280580572  | 2,00E-01 | 6,55E-01 | 8,79E-01 | Tmem222  | 1,02 | No  |
| ENSMUSG00000028859 | -2,85E-01 | 2,955930225  | 6,13E+00 | 1,33E-02 | 1,15E-01 | Csf3r    | 0,82 | No  |
| ENSMUSG00000028860 | -1,85E-01 | -0,879891891 | 2,00E-01 | 6,55E-01 | 8,79E-01 | Sytl1    | 0,88 | No  |
| ENSMUSG00000028861 | 3,56E-02  | 4,681691732  | 2,06E-01 | 6,50E-01 | 8,76E-01 | Mrps15   | 1,02 | No  |
| ENSMUSG00000028862 | 4,36E-01  | 3,373485427  | 1,76E+01 | 2,69E-05 | 8,00E-04 | Map3k6   | 1,35 | Yes |
| ENSMUSG00000028863 | 2,52E-02  | 4,771724145  | 1,08E-01 | 7,43E-01 | 9,28E-01 | Meaf6    | 1,02 | No  |
| ENSMUSG00000028864 | 2,78E-01  | 3,506351957  | 7,55E+00 | 6,01E-03 | 6,43E-02 | Hgf      | 1,21 | No  |
| ENSMUSG00000028865 | 1,17E-01  | -2,600717295 | 1,32E-02 | 9,09E-01 | 1,00E+00 | Cd164l2  | 1,08 | No  |
| ENSMUSG00000028868 | -1,44E-02 | 7,972852065  | 6,07E-02 | 8,05E-01 | 9,63E-01 | Wasf2    | 0,99 | No  |
| ENSMUSG00000028869 | -1,10E-01 | 5,055793441  | 2,26E+00 | 1,33E-01 | 4,59E-01 | Gnl2     | 0,93 | No  |
| ENSMUSG00000028871 | -7,22E-02 | -2,655052582 | 3,49E-03 | 9,53E-01 | 1,00E+00 | Rspo1    | 0,95 | No  |
| ENSMUSG00000028873 | 1,70E-01  | 5,409509122  | 5,92E+00 | 1,49E-02 | 1,25E-01 | Cdca8    | 1,13 | No  |
| ENSMUSG00000028874 | 8,21E-02  | 7,049079484  | 1,84E+00 | 1,75E-01 | 5,33E-01 | Fgr      | 1,06 | No  |
| ENSMUSG00000028876 | -7,62E-01 | -1,998032447 | 1,18E+00 | 2,77E-01 | 5,73E-01 | Epha10   | 0,59 | No  |
| ENSMUSG00000028878 | 7,70E-02  | 5,827246645  | 1,33E+00 | 2,49E-01 | 5,50E-01 | Fam76a   | 1,05 | No  |
| ENSMUSG00000028879 | -3,77E-02 | 6,482522129  | 3,60E-01 | 5,49E-01 | 8,16E-01 | Stx12    | 0,97 | No  |
| ENSMUSG00000028882 | 5,72E-02  | 4,981145714  | 5,94E-01 | 4,41E-01 | 7,33E-01 | Ppp1r8   | 1,04 | No  |
| ENSMUSG00000028883 | -7,63E-02 | -2,185699107 | 9,43E-03 | 9,23E-01 | 1,00E+00 | Sema3a   | 0,95 | No  |
| ENSMUSG00000028884 | 1,22E-01  | 4,857481916  | 2,62E+00 | 1,06E-01 | 3,98E-01 | Rpa2     | 1,09 | No  |

|                    |           |              |           |          |          |          |      |     |
|--------------------|-----------|--------------|-----------|----------|----------|----------|------|-----|
| ENSMUSG00000028885 | -2,35E-01 | 4,783116144  | 9,43E+00  | 2,13E-03 | 2,94E-02 | Smpdl3b  | 0,85 | Yes |
| ENSMUSG00000028886 | -2,66E-02 | 6,361620002  | 1,77E-01  | 6,74E-01 | 8,90E-01 | Eya3     | 0,98 | No  |
| ENSMUSG00000028889 | 1,43E-02  | 5,015105467  | 3,69E-02  | 8,48E-01 | 9,88E-01 | Yrdc     | 1,01 | No  |
| ENSMUSG00000028890 | -1,13E-01 | 5,344760564  | 2,61E+00  | 1,06E-01 | 3,99E-01 | Mtf1     | 0,92 | No  |
| ENSMUSG00000028893 | -1,98E-01 | 6,765575386  | 1,04E+01  | 1,29E-03 | 1,99E-02 | Sesn2    | 0,87 | Yes |
| ENSMUSG00000028894 | -5,07E-02 | 6,498655987  | 6,56E-01  | 4,18E-01 | 7,13E-01 | Inpp5b   | 0,97 | No  |
| ENSMUSG00000028896 | 1,95E-01  | 5,170106331  | 7,32E+00  | 6,80E-03 | 7,03E-02 | Rcc1     | 1,15 | No  |
| ENSMUSG00000028898 | 7,43E-03  | 4,21093375   | 7,59E-03  | 9,31E-01 | 1,00E+00 | Trnau1ap | 1,01 | No  |
| ENSMUSG00000028899 | -1,58E-04 | 4,368815205  | 3,73E-06  | 9,98E-01 | 1,00E+00 | Taf12    | 1,00 | No  |
| ENSMUSG00000028901 | 1,70E-01  | 4,693048003  | 4,71E+00  | 2,99E-02 | 1,98E-01 | Gmeb1    | 1,12 | No  |
| ENSMUSG00000028902 | -4,31E-02 | 4,497173673  | 2,88E-01  | 5,92E-01 | 8,42E-01 | Sf3a3    | 0,97 | No  |
| ENSMUSG00000028906 | -8,59E-02 | 6,737938998  | 1,94E+00  | 1,64E-01 | 5,15E-01 | Epb41    | 0,94 | No  |
| ENSMUSG00000028907 | -5,31E-02 | 4,162409642  | 3,79E-01  | 5,38E-01 | 8,09E-01 | Utp11    | 0,96 | No  |
| ENSMUSG00000028909 | 5,05E-01  | -1,57415713  | 7,90E-01  | 3,74E-01 | 6,75E-01 | Ptpru    | 1,42 | No  |
| ENSMUSG00000028910 | 8,40E-02  | 3,397338914  | 6,69E-01  | 4,13E-01 | 7,09E-01 | Mecr     | 1,06 | No  |
| ENSMUSG00000028911 | 5,56E-02  | 5,613135587  | 6,64E-01  | 4,15E-01 | 7,10E-01 | Srsf4    | 1,04 | No  |
| ENSMUSG00000028914 | 1,32E-01  | 6,041090323  | 4,14E+00  | 4,18E-02 | 2,43E-01 | Casp9    | 1,10 | No  |
| ENSMUSG00000028917 | -1,91E-01 | 7,155628857  | 1,01E+01  | 1,52E-03 | 2,25E-02 | Plekhm2  | 0,88 | Yes |
| ENSMUSG00000028919 | 3,14E-02  | -3,107617333 | -7,69E-10 | 1,00E+00 | 1,00E+00 | Arhgef19 | 1,02 | No  |
| ENSMUSG00000028920 | 7,48E-02  | 5,508448624  | 1,19E+00  | 2,76E-01 | 5,73E-01 | Fbxo42   | 1,05 | No  |
| ENSMUSG00000028923 | -4,84E-02 | 7,531353308  | 6,72E-01  | 4,12E-01 | 7,08E-01 | Necap2   | 0,97 | No  |
| ENSMUSG00000028926 | 2,14E-01  | 4,243195666  | 6,39E+00  | 1,15E-02 | 1,03E-01 | Cdk14    | 1,16 | No  |
| ENSMUSG00000028927 | 1,06E-01  | 2,815345295  | 7,61E-01  | 3,83E-01 | 6,85E-01 | Padi2    | 1,08 | No  |
| ENSMUSG00000028931 | 2,09E-01  | 6,998193838  | 1,18E+01  | 5,95E-04 | 1,06E-02 | Kcnab2   | 1,16 | Yes |
| ENSMUSG00000028932 | -2,53E-02 | 6,069413434  | 1,52E-01  | 6,97E-01 | 9,03E-01 | Psmc2    | 0,98 | No  |
| ENSMUSG00000028933 | 1,75E-01  | 2,624406874  | 1,95E+00  | 1,62E-01 | 5,12E-01 | Xrcc2    | 1,13 | No  |
| ENSMUSG00000028936 | -1,96E-01 | 6,268658948  | 9,47E+00  | 2,08E-03 | 2,90E-02 | Rpl22    | 0,87 | Yes |
| ENSMUSG00000028937 | -1,55E-01 | 6,468065718  | 6,06E+00  | 1,39E-02 | 1,19E-01 | Acot7    | 0,90 | No  |
| ENSMUSG00000028938 | -1,87E+00 | -3,107637761 | 1,39E+00  | 2,38E-01 | 5,50E-01 | Galntl5  | 0,27 | No  |
| ENSMUSG00000028940 | 5,98E-01  | 0,457745391  | 5,43E+00  | 1,98E-02 | 1,50E-01 | Hes2     | 1,51 | No  |
| ENSMUSG00000028943 | 1,17E-01  | 2,979697412  | 1,08E+00  | 2,98E-01 | 5,94E-01 | Espn     | 1,08 | No  |
| ENSMUSG00000028944 | 2,16E-02  | 4,792544638  | 8,03E-02  | 7,77E-01 | 9,46E-01 | Prkag2   | 1,02 | No  |

|                    |           |              |          |          |          |          |      |     |
|--------------------|-----------|--------------|----------|----------|----------|----------|------|-----|
| ENSMUSG00000028945 | 4,96E-02  | 5,750813705  | 5,44E-01 | 4,61E-01 | 7,49E-01 | Rheb     | 1,04 | No  |
| ENSMUSG00000028946 | -8,79E-01 | -2,89610048  | 4,25E-01 | 5,15E-01 | 7,96E-01 | Hes3     | 0,54 | No  |
| ENSMUSG00000028948 | 2,71E-01  | 4,886395378  | 1,29E+01 | 3,31E-04 | 6,57E-03 | Nol9     | 1,21 | Yes |
| ENSMUSG00000028949 | 8,30E-02  | 4,388162205  | 1,02E+00 | 3,14E-01 | 6,14E-01 | Smarcd3  | 1,06 | No  |
| ENSMUSG00000028950 | 3,50E-01  | -1,47302537  | 3,95E-01 | 5,30E-01 | 8,05E-01 | Tas1r1   | 1,27 | No  |
| ENSMUSG00000028952 | 2,55E-01  | 2,847630302  | 4,76E+00 | 2,91E-02 | 1,94E-01 | Zbtb48   | 1,19 | No  |
| ENSMUSG00000028953 | 6,04E-02  | 6,039788526  | 8,60E-01 | 3,54E-01 | 6,55E-01 | Abcf2    | 1,04 | No  |
| ENSMUSG00000028954 | -2,43E-01 | 7,047794518  | 1,61E+01 | 5,91E-05 | 1,56E-03 | Nub1     | 0,85 | Yes |
| ENSMUSG00000028955 | 1,28E-01  | 6,691346423  | 4,27E+00 | 3,88E-02 | 2,33E-01 | Vamp3    | 1,09 | No  |
| ENSMUSG00000028957 | 2,60E-01  | 2,358382612  | 3,78E+00 | 5,18E-02 | 2,77E-01 | Per3     | 1,20 | No  |
| ENSMUSG00000028958 | -9,98E-02 | 3,89331972   | 1,20E+00 | 2,73E-01 | 5,70E-01 | Tmub1    | 0,93 | No  |
| ENSMUSG00000028959 | 1,62E-01  | 6,07030336   | 6,18E+00 | 1,29E-02 | 1,13E-01 | Fastk    | 1,12 | No  |
| ENSMUSG00000028960 | 7,43E-02  | 6,343089571  | 1,37E+00 | 2,41E-01 | 5,50E-01 | Ube4b    | 1,05 | No  |
| ENSMUSG00000028961 | 1,32E-01  | 8,809606424  | 5,33E+00 | 2,09E-02 | 1,56E-01 | Pgd      | 1,10 | No  |
| ENSMUSG00000028962 | 9,23E-02  | 6,151538146  | 2,05E+00 | 1,52E-01 | 4,94E-01 | Slc4a2   | 1,07 | No  |
| ENSMUSG00000028964 | -1,34E-01 | 4,774769392  | 3,04E+00 | 8,11E-02 | 3,66E-01 | Park7    | 0,91 | No  |
| ENSMUSG00000028965 | -8,35E-01 | 6,743554652  | 1,83E+02 | 8,64E-42 | 1,18E-38 | Tnfrsf9  | 0,56 | Yes |
| ENSMUSG00000028967 | -2,31E-02 | 5,00928235   | 9,41E-02 | 7,59E-01 | 9,36E-01 | Errfi1   | 0,98 | No  |
| ENSMUSG00000028969 | 2,58E-02  | 3,882183527  | 8,06E-02 | 7,77E-01 | 9,46E-01 | Cdk5     | 1,02 | No  |
| ENSMUSG00000028970 | 2,45E-01  | 3,654102566  | 6,44E+00 | 1,12E-02 | 1,01E-01 | Abcb1b   | 1,18 | No  |
| ENSMUSG00000028971 | 8,12E-01  | -2,497564179 | 5,74E-01 | 4,49E-01 | 7,39E-01 | Cort     | 1,76 | No  |
| ENSMUSG00000028972 | -1,37E+00 | -2,355429764 | 2,57E+00 | 1,09E-01 | 4,04E-01 | Car6     | 0,39 | No  |
| ENSMUSG00000028973 | 4,99E-02  | 4,919277194  | 4,46E-01 | 5,04E-01 | 7,89E-01 | Abcb8    | 1,04 | No  |
| ENSMUSG00000028974 | 9,56E-02  | 5,114255932  | 1,72E+00 | 1,90E-01 | 5,50E-01 | Dffa     | 1,07 | No  |
| ENSMUSG00000028975 | -1,25E-01 | 4,157796773  | 2,11E+00 | 1,47E-01 | 4,85E-01 | Pex14    | 0,92 | No  |
| ENSMUSG00000028976 | -1,54E+00 | -2,107591405 | 3,42E+00 | 6,43E-02 | 3,17E-01 | Slc2a5   | 0,34 | No  |
| ENSMUSG00000028977 | -1,37E-01 | 4,389239674  | 2,85E+00 | 9,15E-02 | 3,82E-01 | Casz1    | 0,91 | No  |
| ENSMUSG00000028978 | 5,55E-02  | -1,697391224 | 8,25E-03 | 9,28E-01 | 1,00E+00 | Nos3     | 1,04 | No  |
| ENSMUSG00000028979 | -3,60E-01 | 3,258736703  | 1,13E+01 | 7,85E-04 | 1,32E-02 | Masp2    | 0,78 | Yes |
| ENSMUSG00000028980 | 2,48E-01  | 5,144096875  | 1,17E+01 | 6,12E-04 | 1,08E-02 | H6pd     | 1,19 | Yes |
| ENSMUSG00000028982 | -2,06E-02 | 2,53170588   | 2,43E-02 | 8,76E-01 | 1,00E+00 | Slc25a33 | 0,99 | No  |
| ENSMUSG00000028986 | 2,36E-02  | 4,022678834  | 7,01E-02 | 7,91E-01 | 9,55E-01 | Klhl7    | 1,02 | No  |

|                    |           |              |          |          |          |          |      |     |
|--------------------|-----------|--------------|----------|----------|----------|----------|------|-----|
| ENSMUSG00000028988 | 1,22E-01  | 4,115940959  | 1,99E+00 | 1,58E-01 | 5,05E-01 | Ctnnbip1 | 1,09 | No  |
| ENSMUSG00000028989 | -4,61E-01 | -1,896111237 | 3,91E-01 | 5,32E-01 | 8,05E-01 | Angptl7  | 0,73 | No  |
| ENSMUSG00000028990 | 4,03E-03  | 4,353311381  | 2,40E-03 | 9,61E-01 | 1,00E+00 | Lzic     | 1,00 | No  |
| ENSMUSG00000028991 | -2,17E-01 | 6,477300575  | 1,20E+01 | 5,33E-04 | 9,65E-03 | Mtor     | 0,86 | Yes |
| ENSMUSG00000028992 | -1,28E-01 | 3,40740632   | 1,63E+00 | 2,02E-01 | 5,50E-01 | Nmnat1   | 0,92 | No  |
| ENSMUSG00000028995 | 1,32E-01  | 5,895343117  | 4,02E+00 | 4,50E-02 | 2,53E-01 | Fam126a  | 1,10 | No  |
| ENSMUSG00000028996 | 1,89E+00  | -3,033614598 | 1,38E+00 | 2,40E-01 | 5,50E-01 | Rbp7     | 3,70 | No  |
| ENSMUSG00000028998 | -1,65E-01 | 5,320184293  | 5,43E+00 | 1,98E-02 | 1,50E-01 | Tomm7    | 0,89 | No  |
| ENSMUSG00000028999 | 1,79E-01  | 3,688817855  | 3,61E+00 | 5,73E-02 | 2,95E-01 | Rint1    | 1,13 | No  |
| ENSMUSG00000029001 | -2,44E-01 | 2,176042237  | 2,84E+00 | 9,21E-02 | 3,82E-01 | Fbxo44   | 0,84 | No  |
| ENSMUSG00000029003 | 1,62E-01  | 2,891425018  | 1,92E+00 | 1,66E-01 | 5,19E-01 | Mad2l2   | 1,12 | No  |
| ENSMUSG00000029004 | 9,40E-02  | 6,831456206  | 2,35E+00 | 1,25E-01 | 4,43E-01 | Kmt2e    | 1,07 | No  |
| ENSMUSG00000029005 | -3,55E+00 | -2,8319544   | 5,67E+00 | 1,73E-02 | 1,37E-01 | Draxin   | 0,09 | No  |
| ENSMUSG00000029007 | 2,96E-02  | 6,946445839  | 2,36E-01 | 6,27E-01 | 8,61E-01 | Agtrap   | 1,02 | No  |
| ENSMUSG00000029009 | 1,46E-01  | 5,893862275  | 4,93E+00 | 2,64E-02 | 1,82E-01 | Mthfr    | 1,11 | No  |
| ENSMUSG00000029012 | 2,77E-02  | 3,45743161   | 7,69E-02 | 7,82E-01 | 9,49E-01 | Orc5     | 1,02 | No  |
| ENSMUSG00000029014 | 4,36E-02  | 4,968012229  | 3,42E-01 | 5,59E-01 | 8,22E-01 | Dnajc2   | 1,03 | No  |
| ENSMUSG00000029016 | 1,80E-01  | 4,801851576  | 5,50E+00 | 1,90E-02 | 1,46E-01 | Clcn6    | 1,13 | No  |
| ENSMUSG00000029017 | -1,06E-01 | 5,034497946  | 2,04E+00 | 1,53E-01 | 4,96E-01 | Pmpcb    | 0,93 | No  |
| ENSMUSG00000029019 | -3,73E-01 | 0,266610117  | 1,84E+00 | 1,75E-01 | 5,33E-01 | Nppb     | 0,77 | No  |
| ENSMUSG00000029020 | 9,66E-02  | 6,356801719  | 2,32E+00 | 1,28E-01 | 4,49E-01 | Mfn2     | 1,07 | No  |
| ENSMUSG00000029022 | -2,31E-01 | 5,210862831  | 1,04E+01 | 1,23E-03 | 1,92E-02 | Miip     | 0,85 | Yes |
| ENSMUSG00000029026 | 8,10E-01  | -2,770570729 | 5,69E-01 | 4,51E-01 | 7,41E-01 | Trp73    | 1,75 | No  |
| ENSMUSG00000029027 | -4,89E-02 | 3,290588788  | 2,22E-01 | 6,38E-01 | 8,68E-01 | Dffb     | 0,97 | No  |
| ENSMUSG00000029028 | 6,43E-02  | 5,808158396  | 9,26E-01 | 3,36E-01 | 6,37E-01 | Lrrc47   | 1,05 | No  |
| ENSMUSG00000029029 | -1,03E-01 | 3,45758006   | 1,06E+00 | 3,03E-01 | 5,99E-01 | Wrap73   | 0,93 | No  |
| ENSMUSG00000029030 | -1,53E-01 | 6,730330917  | 6,14E+00 | 1,32E-02 | 1,15E-01 | Tprgl    | 0,90 | No  |
| ENSMUSG00000029032 | -5,72E-01 | -2,831971956 | 2,57E-01 | 6,12E-01 | 8,52E-01 | Arhgef16 | 0,67 | No  |
| ENSMUSG00000029033 | 1,42E-01  | 5,075098554  | 3,75E+00 | 5,29E-02 | 2,81E-01 | Acap3    | 1,10 | No  |
| ENSMUSG00000029034 | -1,13E-01 | 5,187085629  | 2,48E+00 | 1,15E-01 | 4,19E-01 | Ints11   | 0,92 | No  |
| ENSMUSG00000029036 | 1,59E-01  | 4,471544742  | 3,78E+00 | 5,18E-02 | 2,77E-01 | Atad3a   | 1,12 | No  |
| ENSMUSG00000029038 | -7,03E-02 | 6,136240334  | 1,19E+00 | 2,76E-01 | 5,73E-01 | Ssu72    | 0,95 | No  |

|                    |           |              |          |          |          |               |      |     |
|--------------------|-----------|--------------|----------|----------|----------|---------------|------|-----|
| ENSMUSG00000029047 | 6,24E-02  | 2,327295368  | 2,09E-01 | 6,48E-01 | 8,75E-01 | Pex10         | 1,04 | No  |
| ENSMUSG00000029048 | 9,17E-02  | 6,278171203  | 2,06E+00 | 1,51E-01 | 4,93E-01 | Rer1          | 1,07 | No  |
| ENSMUSG00000029049 | 1,68E-01  | 0,062160154  | 3,52E-01 | 5,53E-01 | 8,19E-01 | Morn1         | 1,12 | No  |
| ENSMUSG00000029050 | 2,89E-01  | 7,657909551  | 2,39E+01 | 1,03E-06 | 4,56E-05 | Ski           | 1,22 | Yes |
| ENSMUSG00000029053 | -2,88E-01 | -1,333222792 | 3,98E-01 | 5,28E-01 | 8,04E-01 | Prkcz         | 0,82 | No  |
| ENSMUSG00000029054 | -5,64E-01 | -1,998042796 | 6,96E-01 | 4,04E-01 | 7,01E-01 | Gabrd         | 0,68 | No  |
| ENSMUSG00000029055 | -8,91E-02 | -2,896169321 | 3,42E-03 | 9,53E-01 | 1,00E+00 | Plch2         | 0,94 | No  |
| ENSMUSG00000029056 | 1,70E-01  | 5,05859182   | 5,36E+00 | 2,06E-02 | 1,54E-01 | Pank4         | 1,13 | No  |
| ENSMUSG00000029059 | 1,70E-01  | 1,727760204  | 1,07E+00 | 3,01E-01 | 5,97E-01 | Fam213b       | 1,12 | No  |
| ENSMUSG00000029060 | 1,16E-01  | 5,479276594  | 2,80E+00 | 9,42E-02 | 3,84E-01 | Mib2          | 1,08 | No  |
| ENSMUSG00000029061 | -2,17E-01 | 3,906891663  | 6,07E+00 | 1,37E-02 | 1,18E-01 | Mmp23         | 0,86 | No  |
| ENSMUSG00000029062 | -2,49E-02 | 6,294757397  | 1,53E-01 | 6,96E-01 | 9,02E-01 | Cdk11b        | 0,98 | No  |
| ENSMUSG00000029063 | 4,41E-02  | 7,330218933  | 5,45E-01 | 4,60E-01 | 7,49E-01 | Nadk          | 1,03 | No  |
| ENSMUSG00000029064 | -5,66E-02 | 8,355696849  | 9,64E-01 | 3,26E-01 | 6,27E-01 | Gnb1          | 0,96 | No  |
| ENSMUSG00000029066 | -6,62E-02 | 5,074845698  | 8,18E-01 | 3,66E-01 | 6,67E-01 | Mrpl20        | 0,96 | No  |
| ENSMUSG00000029068 | -9,03E-02 | 7,196710472  | 2,27E+00 | 1,32E-01 | 4,57E-01 | Ccnl2         | 0,94 | No  |
| ENSMUSG00000029070 | -4,05E-01 | -0,442634379 | 1,43E+00 | 2,32E-01 | 5,50E-01 | Mxra8         | 0,76 | No  |
| ENSMUSG00000029071 | -1,18E-01 | 5,322515212  | 2,78E+00 | 9,55E-02 | 3,86E-01 | Dvl1          | 0,92 | No  |
| ENSMUSG00000029072 | 8,58E-02  | 0,791502419  | 1,43E-01 | 7,05E-01 | 9,07E-01 | Tas1r3        | 1,06 | No  |
| ENSMUSG00000029073 | 1,52E-01  | 4,505294743  | 3,59E+00 | 5,81E-02 | 2,97E-01 | Cptp          | 1,11 | No  |
| ENSMUSG00000029074 | -2,21E+00 | -2,448535489 | 6,30E+00 | 1,21E-02 | 1,07E-01 | Ttll10        | 0,22 | No  |
| ENSMUSG00000029075 | -7,62E-01 | 2,966283344  | 4,74E+01 | 5,72E-12 | 6,37E-10 | Tnfrsf4       | 0,59 | Yes |
| ENSMUSG00000029076 | -1,61E-01 | 7,832275274  | 7,55E+00 | 6,00E-03 | 6,42E-02 | Sdf4          | 0,89 | No  |
| ENSMUSG00000029082 | -1,60E-01 | 6,610604007  | 6,59E+00 | 1,03E-02 | 9,53E-02 | Bst1          | 0,89 | No  |
| ENSMUSG00000029084 | -3,85E-01 | 4,397395248  | 2,20E+01 | 2,75E-06 | 1,07E-04 | Cd38          | 0,77 | Yes |
| ENSMUSG00000029086 | -2,15E-01 | 0,233023641  | 6,19E-01 | 4,31E-01 | 7,25E-01 | Prom1         | 0,86 | No  |
| ENSMUSG00000029088 | -1,43E-01 | 0,621440669  | 3,79E-01 | 5,38E-01 | 8,09E-01 | Kcnip4        | 0,91 | No  |
| ENSMUSG00000029089 | -2,65E-02 | 3,059729105  | 5,74E-02 | 8,11E-01 | 9,66E-01 | 5730480H06Rik | 0,98 | No  |
| ENSMUSG00000029090 | 9,04E-03  | 1,486746311  | 2,69E-03 | 9,59E-01 | 1,00E+00 | Adgra3        | 1,01 | No  |
| ENSMUSG00000029092 | -2,23E-02 | -2,832006671 | 3,01E-04 | 9,86E-01 | 1,00E+00 | D5Ertd615e    | 0,98 | No  |
| ENSMUSG00000029094 | -4,59E-02 | 3,882404284  | 2,51E-01 | 6,17E-01 | 8,55E-01 | Afap1         | 0,97 | No  |
| ENSMUSG00000029095 | 6,75E-01  | 0,545030857  | 7,58E+00 | 5,89E-03 | 6,33E-02 | Ablim2        | 1,60 | No  |



|                    |           |              |           |          |          |               |      |     |
|--------------------|-----------|--------------|-----------|----------|----------|---------------|------|-----|
| ENSMUSG00000029096 | 8,35E-01  | 2,244337023  | 3,28E+01  | 1,03E-08 | 7,12E-07 | Htra3         | 1,78 | Yes |
| ENSMUSG00000029097 | 9,63E-02  | 3,705147552  | 1,05E+00  | 3,04E-01 | 6,01E-01 | Trmt44        | 1,07 | No  |
| ENSMUSG00000029098 | 1,11E-01  | 8,054040623  | 3,66E+00  | 5,56E-02 | 2,89E-01 | Acox3         | 1,08 | No  |
| ENSMUSG00000029101 | -2,21E-01 | 5,019889514  | 9,18E+00  | 2,45E-03 | 3,28E-02 | Rgs12         | 0,86 | Yes |
| ENSMUSG00000029102 | 4,76E-02  | 5,562633125  | 4,84E-01  | 4,87E-01 | 7,74E-01 | Hgfac         | 1,03 | No  |
| ENSMUSG00000029103 | 1,83E-01  | 8,824646101  | 1,02E+01  | 1,38E-03 | 2,09E-02 | Lrpap1        | 1,13 | Yes |
| ENSMUSG00000029104 | 1,43E-01  | 7,389253301  | 5,73E+00  | 1,66E-02 | 1,35E-01 | Htt           | 1,10 | No  |
| ENSMUSG00000029106 | -1,21E-01 | 7,877189479  | 4,28E+00  | 3,85E-02 | 2,33E-01 | Add1          | 0,92 | No  |
| ENSMUSG00000029108 | 4,54E-01  | 3,498003371  | 2,04E+01  | 6,13E-06 | 2,17E-04 | Pcdh7         | 1,37 | Yes |
| ENSMUSG00000029110 | 6,36E-02  | 7,179350079  | 1,12E+00  | 2,91E-01 | 5,86E-01 | Rnf4          | 1,05 | No  |
| ENSMUSG00000029111 | 8,15E-02  | 4,237229908  | 9,30E-01  | 3,35E-01 | 6,36E-01 | Nelfa         | 1,06 | No  |
| ENSMUSG00000029119 | 1,18E-01  | 7,190170429  | 3,85E+00  | 4,97E-02 | 2,69E-01 | Man2b2        | 1,09 | No  |
| ENSMUSG00000029120 | 1,12E+00  | -2,655168239 | 1,19E+00  | 2,76E-01 | 5,73E-01 | Ppp2r2c       | 2,17 | No  |
| ENSMUSG00000029121 | -3,83E-02 | -3,107651936 | -7,91E-11 | 1,00E+00 | 1,00E+00 | Crmp1         | 0,97 | No  |
| ENSMUSG00000029125 | 6,04E-02  | 3,803797229  | 4,18E-01  | 5,18E-01 | 7,98E-01 | Stx18         | 1,04 | No  |
| ENSMUSG00000029126 | -5,55E-02 | 0,276174878  | 4,29E-02  | 8,36E-01 | 9,80E-01 | Nsg1          | 0,96 | No  |
| ENSMUSG00000029127 | 1,37E-01  | 3,035252828  | 1,52E+00  | 2,18E-01 | 5,50E-01 | Zbtb49        | 1,10 | No  |
| ENSMUSG00000029128 | 5,55E-02  | 4,168196251  | 4,16E-01  | 5,19E-01 | 7,98E-01 | Rab28         | 1,04 | No  |
| ENSMUSG00000029130 | -2,50E-01 | -1,740851608 | 1,23E-01  | 7,25E-01 | 9,18E-01 | Rnf32         | 0,84 | No  |
| ENSMUSG00000029131 | -1,60E-01 | 5,988073676  | 5,94E+00  | 1,48E-02 | 1,25E-01 | Dnajb6        | 0,90 | No  |
| ENSMUSG00000029134 | 3,48E-01  | -1,278711558 | 4,90E-01  | 4,84E-01 | 7,71E-01 | Plb1          | 1,27 | No  |
| ENSMUSG00000029135 | -1,02E-01 | 7,690265162  | 2,96E+00  | 8,55E-02 | 3,76E-01 | Fosl2         | 0,93 | No  |
| ENSMUSG00000029136 | -5,44E-01 | 1,602081874  | 1,07E+01  | 1,08E-03 | 1,72E-02 | Rbks          | 0,69 | Yes |
| ENSMUSG00000029138 | 1,35E+00  | -1,912714423 | 3,94E+00  | 4,72E-02 | 2,60E-01 | 4930548H24Rik | 2,54 | No  |
| ENSMUSG00000029141 | 3,18E-02  | 4,418056621  | 1,53E-01  | 6,95E-01 | 9,02E-01 | Slc4a1ap      | 1,02 | No  |
| ENSMUSG00000029145 | -1,04E-01 | 4,247246369  | 1,55E+00  | 2,13E-01 | 5,50E-01 | Eif2b4        | 0,93 | No  |
| ENSMUSG00000029146 | 7,18E-02  | 5,989160303  | 1,20E+00  | 2,74E-01 | 5,70E-01 | Snx17         | 1,05 | No  |
| ENSMUSG00000029147 | 5,58E-02  | 6,628330611  | 8,04E-01  | 3,70E-01 | 6,71E-01 | Ppm1g         | 1,04 | No  |
| ENSMUSG00000029148 | -6,61E-02 | 6,294289234  | 1,08E+00  | 2,98E-01 | 5,94E-01 | Nrbp1         | 0,96 | No  |
| ENSMUSG00000029149 | -9,00E-02 | 1,661109584  | 3,03E-01  | 5,82E-01 | 8,38E-01 | Krtcap3       | 0,94 | No  |
| ENSMUSG00000029151 | 7,14E-01  | -2,896146507 | 2,77E-01  | 5,98E-01 | 8,45E-01 | Slc30a3       | 1,64 | No  |
| ENSMUSG00000029152 | -2,20E-02 | 6,591917748  | 1,25E-01  | 7,23E-01 | 9,17E-01 | Ociad1        | 0,98 | No  |

|                    |           |              |           |          |          |            |      |     |
|--------------------|-----------|--------------|-----------|----------|----------|------------|------|-----|
| ENSMUSG00000029153 | -4,19E-01 | -1,107606169 | 8,76E-01  | 3,49E-01 | 6,50E-01 | Ociad2     | 0,75 | No  |
| ENSMUSG00000029154 | -3,18E+00 | -2,963258684 | 4,26E+00  | 3,90E-02 | 2,34E-01 | Cwh43      | 0,11 | No  |
| ENSMUSG00000029156 | 4,83E-02  | 3,614661754  | 2,44E-01  | 6,21E-01 | 8,57E-01 | Sgcb       | 1,03 | No  |
| ENSMUSG00000029158 | 4,19E-01  | -2,600743634 | 1,37E-01  | 7,11E-01 | 9,10E-01 | Yipf7      | 1,34 | No  |
| ENSMUSG00000029161 | -5,29E-01 | 1,06288769   | 6,95E+00  | 8,39E-03 | 8,22E-02 | Cgref1     | 0,69 | No  |
| ENSMUSG00000029162 | -6,68E-02 | 3,281473758  | 4,04E-01  | 5,25E-01 | 8,02E-01 | Khk        | 0,95 | No  |
| ENSMUSG00000029163 | 1,35E-01  | 6,40975102   | 4,51E+00  | 3,37E-02 | 2,16E-01 | Emilin1    | 1,10 | No  |
| ENSMUSG00000029165 | -3,54E-02 | 3,956011393  | 1,57E-01  | 6,92E-01 | 9,00E-01 | Agbl5      | 0,98 | No  |
| ENSMUSG00000029166 | 5,84E-02  | 4,10152207   | 4,48E-01  | 5,03E-01 | 7,88E-01 | Mapre3     | 1,04 | No  |
| ENSMUSG00000029167 | -7,79E-01 | -1,683192917 | 1,79E+00  | 1,81E-01 | 5,42E-01 | Ppargc1a   | 0,58 | No  |
| ENSMUSG00000029168 | -7,85E-01 | 4,454162521  | 9,73E+01  | 5,96E-23 | 1,84E-20 | Dpysl5     | 0,58 | Yes |
| ENSMUSG00000029169 | -8,66E-02 | 7,778325695  | 2,18E+00  | 1,39E-01 | 4,71E-01 | Dhx15      | 0,94 | No  |
| ENSMUSG00000029171 | -4,93E-02 | 4,988954162  | 4,44E-01  | 5,05E-01 | 7,90E-01 | Pgm1       | 0,97 | No  |
| ENSMUSG00000029173 | -4,01E-01 | 5,676682138  | 3,56E+01  | 2,42E-09 | 1,85E-07 | Sepsecs    | 0,76 | Yes |
| ENSMUSG00000029174 | -1,21E-01 | 6,255335991  | 3,62E+00  | 5,71E-02 | 2,94E-01 | Tbc1d1     | 0,92 | No  |
| ENSMUSG00000029175 | 2,51E-01  | 7,328255265  | 1,75E+01  | 2,86E-05 | 8,42E-04 | Slc35f6    | 1,19 | Yes |
| ENSMUSG00000029176 | -9,94E-03 | 4,735265957  | 1,68E-02  | 8,97E-01 | 1,00E+00 | Anapc4     | 0,99 | No  |
| ENSMUSG00000029177 | 1,23E-01  | 6,728349402  | 3,96E+00  | 4,65E-02 | 2,57E-01 | Cenpa      | 1,09 | No  |
| ENSMUSG00000029178 | 2,32E-01  | 5,306810889  | 1,09E+01  | 9,54E-04 | 1,56E-02 | Klf3       | 1,17 | Yes |
| ENSMUSG00000029179 | 1,02E-01  | 3,637447997  | 1,14E+00  | 2,85E-01 | 5,81E-01 | Zcchc4     | 1,07 | No  |
| ENSMUSG00000029184 | -3,76E-01 | 0,372320228  | 2,29E+00  | 1,30E-01 | 4,53E-01 | Olf109     | 0,77 | No  |
| ENSMUSG00000029185 | 5,29E-02  | 2,152137674  | 1,32E-01  | 7,17E-01 | 9,13E-01 | Fam114a1   | 1,04 | No  |
| ENSMUSG00000029186 | -2,24E-01 | 5,004574084  | 9,19E+00  | 2,43E-03 | 3,26E-02 | Pi4k2b     | 0,86 | Yes |
| ENSMUSG00000029188 | -4,13E-02 | -3,033659495 | 7,08E-04  | 9,79E-01 | 1,00E+00 | Slc34a2    | 0,97 | No  |
| ENSMUSG00000029189 | 1,88E-01  | -1,267937585 | 1,60E-01  | 6,89E-01 | 8,99E-01 | Sel1l3     | 1,14 | No  |
| ENSMUSG00000029190 | 7,88E-02  | 5,764562063  | 1,38E+00  | 2,40E-01 | 5,50E-01 | D5Ertd579e | 1,06 | No  |
| ENSMUSG00000029191 | 1,22E-01  | 6,052711382  | 3,48E+00  | 6,20E-02 | 3,10E-01 | Rfc1       | 1,09 | No  |
| ENSMUSG00000029192 | -1,17E-01 | 6,569811988  | 3,51E+00  | 6,09E-02 | 3,06E-01 | Tbc1d14    | 0,92 | No  |
| ENSMUSG00000029193 | 3,14E-02  | -3,107617333 | -7,69E-10 | 1,00E+00 | 1,00E+00 | Cckar      | 1,02 | No  |
| ENSMUSG00000029195 | -2,02E+00 | -2,655085615 | 3,08E+00  | 7,92E-02 | 3,60E-01 | Klb        | 0,25 | No  |
| ENSMUSG00000029196 | 8,82E-02  | 4,192474391  | 1,08E+00  | 2,99E-01 | 5,96E-01 | Tada2b     | 1,06 | No  |
| ENSMUSG00000029198 | 2,45E-02  | 5,953160312  | 1,38E-01  | 7,10E-01 | 9,09E-01 | Grpel1     | 1,02 | No  |

|                    |           |              |          |          |          |         |      |     |
|--------------------|-----------|--------------|----------|----------|----------|---------|------|-----|
| ENSMUSG00000029199 | -8,75E-02 | 4,085667081  | 1,01E+00 | 3,15E-01 | 6,16E-01 | Lias    | 0,94 | No  |
| ENSMUSG00000029201 | 7,36E-02  | 6,06250074   | 1,28E+00 | 2,59E-01 | 5,51E-01 | Ugdh    | 1,05 | No  |
| ENSMUSG00000029202 | 1,61E-02  | 7,474867918  | 7,36E-02 | 7,86E-01 | 9,52E-01 | Pds5a   | 1,01 | No  |
| ENSMUSG00000029203 | -6,92E-02 | 5,561467589  | 1,01E+00 | 3,14E-01 | 6,14E-01 | Ube2k   | 0,95 | No  |
| ENSMUSG00000029204 | 1,70E-01  | 5,281732426  | 5,52E+00 | 1,88E-02 | 1,45E-01 | Rhoh    | 1,12 | No  |
| ENSMUSG00000029205 | -3,40E-01 | -2,31122142  | 1,73E-01 | 6,78E-01 | 8,92E-01 | Chrna9  | 0,79 | No  |
| ENSMUSG00000029206 | -5,49E-01 | -2,655091964 | 2,36E-01 | 6,27E-01 | 8,60E-01 | Nsun7   | 0,68 | No  |
| ENSMUSG00000029207 | 2,38E-01  | 5,262872496  | 1,12E+01 | 8,28E-04 | 1,38E-02 | Apbb2   | 1,18 | Yes |
| ENSMUSG00000029208 | 3,05E-02  | 4,566956768  | 1,51E-01 | 6,98E-01 | 9,04E-01 | Guf1    | 1,02 | No  |
| ENSMUSG00000029209 | 1,04E-01  | 3,883016406  | 1,32E+00 | 2,51E-01 | 5,50E-01 | Gnpda2  | 1,07 | No  |
| ENSMUSG00000029211 | 1,21E+00  | -2,896162599 | 9,04E-01 | 3,42E-01 | 6,42E-01 | Gabra4  | 2,31 | No  |
| ENSMUSG00000029212 | -2,79E-01 | -0,215860516 | 7,76E-01 | 3,78E-01 | 6,79E-01 | Gabrb1  | 0,82 | No  |
| ENSMUSG00000029213 | 4,96E-02  | 6,117424905  | 5,88E-01 | 4,43E-01 | 7,35E-01 | Commd8  | 1,03 | No  |
| ENSMUSG00000029217 | 8,99E-02  | 6,051681981  | 1,91E+00 | 1,67E-01 | 5,20E-01 | Tec     | 1,06 | No  |
| ENSMUSG00000029221 | 8,68E-02  | 5,465857557  | 1,57E+00 | 2,10E-01 | 5,50E-01 | Slc30a9 | 1,06 | No  |
| ENSMUSG00000029223 | 3,79E-01  | 3,669927423  | 1,57E+01 | 7,33E-05 | 1,87E-03 | Uchl1   | 1,30 | Yes |
| ENSMUSG00000029227 | -3,44E-02 | 5,650387992  | 2,54E-01 | 6,14E-01 | 8,53E-01 | Fip1l1  | 0,98 | No  |
| ENSMUSG00000029228 | 2,99E-01  | 0,943261284  | 1,87E+00 | 1,72E-01 | 5,28E-01 | Lnx1    | 1,23 | No  |
| ENSMUSG00000029229 | 2,50E-02  | 5,158207702  | 1,19E-01 | 7,30E-01 | 9,21E-01 | Chic2   | 1,02 | No  |
| ENSMUSG00000029231 | -4,07E-01 | -1,497566785 | 6,06E-01 | 4,36E-01 | 7,29E-01 | Pdgfra  | 0,75 | No  |
| ENSMUSG00000029233 | 1,97E-01  | 5,656578353  | 8,37E+00 | 3,81E-03 | 4,56E-02 | Srd5a3  | 1,15 | Yes |
| ENSMUSG00000029234 | 3,95E-02  | 6,570685352  | 4,02E-01 | 5,26E-01 | 8,03E-01 | Tmem165 | 1,03 | No  |
| ENSMUSG00000029236 | -6,12E-01 | -2,831952993 | 2,96E-01 | 5,87E-01 | 8,40E-01 | Nmu     | 0,65 | No  |
| ENSMUSG00000029238 | 1,15E-01  | 5,841979497  | 2,95E+00 | 8,58E-02 | 3,77E-01 | Clock   | 1,08 | No  |
| ENSMUSG00000029245 | 1,82E+00  | -3,033661385 | 1,31E+00 | 2,52E-01 | 5,50E-01 | Epha5   | 3,54 | No  |
| ENSMUSG00000029246 | 8,73E-02  | 4,373650312  | 1,12E+00 | 2,91E-01 | 5,86E-01 | Ppat    | 1,06 | No  |
| ENSMUSG00000029247 | -4,99E-02 | 6,471299099  | 6,32E-01 | 4,27E-01 | 7,21E-01 | Paics   | 0,97 | No  |
| ENSMUSG00000029248 | 3,43E-01  | -1,800955608 | 3,13E-01 | 5,76E-01 | 8,34E-01 | Thegl   | 1,27 | No  |
| ENSMUSG00000029249 | 5,49E-03  | 5,742013235  | 6,84E-03 | 9,34E-01 | 1,00E+00 | Rest    | 1,00 | No  |
| ENSMUSG00000029250 | 4,33E-02  | 6,001566914  | 4,38E-01 | 5,08E-01 | 7,92E-01 | Polr2b  | 1,03 | No  |
| ENSMUSG00000029253 | 2,55E-02  | 4,193403285  | 9,01E-02 | 7,64E-01 | 9,39E-01 | Cenpc1  | 1,02 | No  |
| ENSMUSG00000029254 | -3,38E-01 | 4,842715038  | 1,96E+01 | 9,66E-06 | 3,27E-04 | Stap1   | 0,79 | Yes |

|                    |           |              |          |          |          |          |       |     |
|--------------------|-----------|--------------|----------|----------|----------|----------|-------|-----|
| ENSMUSG00000029255 | 1,85E+00  | -3,107657832 | 1,35E+00 | 2,46E-01 | 5,50E-01 | Gnrhr    | 3,61  | No  |
| ENSMUSG00000029263 | 7,75E-02  | 3,51214197   | 6,14E-01 | 4,33E-01 | 7,27E-01 | Pigg     | 1,06  | No  |
| ENSMUSG00000029265 | 5,34E-02  | 6,770224776  | 7,55E-01 | 3,85E-01 | 6,86E-01 | Dr1      | 1,04  | No  |
| ENSMUSG00000029267 | 1,39E-01  | 5,048017595  | 3,60E+00 | 5,79E-02 | 2,97E-01 | Mtf2     | 1,10  | No  |
| ENSMUSG00000029270 | 9,89E-02  | 4,986186346  | 1,77E+00 | 1,83E-01 | 5,45E-01 | Fam69a   | 1,07  | No  |
| ENSMUSG00000029275 | 3,54E-01  | 1,245730225  | 3,43E+00 | 6,41E-02 | 3,17E-01 | Gfi1     | 1,28  | No  |
| ENSMUSG00000029276 | -1,50E-01 | 2,075840535  | 1,08E+00 | 2,99E-01 | 5,95E-01 | Glmn     | 0,90  | No  |
| ENSMUSG00000029279 | 1,17E-01  | 0,710316197  | 2,76E-01 | 6,00E-01 | 8,46E-01 | Brdt     | 1,08  | No  |
| ENSMUSG00000029283 | 4,00E-01  | 4,591800935  | 2,58E+01 | 3,70E-07 | 1,81E-05 | Cdc7     | 1,32  | Yes |
| ENSMUSG00000029286 | -8,82E-01 | -2,963247103 | 4,30E-01 | 5,12E-01 | 7,95E-01 | Enam     | 0,54  | No  |
| ENSMUSG00000029287 | 2,02E-01  | 2,976462884  | 2,99E+00 | 8,37E-02 | 3,71E-01 | Tgfbr3   | 1,15  | No  |
| ENSMUSG00000029290 | 1,80E-02  | 5,174872592  | 6,24E-02 | 8,03E-01 | 9,62E-01 | Zfp326   | 1,01  | No  |
| ENSMUSG00000029291 | -1,12E-01 | 4,961357857  | 2,25E+00 | 1,34E-01 | 4,60E-01 | Rufy3    | 0,93  | No  |
| ENSMUSG00000029298 | -3,30E-02 | 4,947220316  | 1,99E-01 | 6,56E-01 | 8,80E-01 | Gbp9     | 0,98  | No  |
| ENSMUSG00000029299 | 6,53E-01  | 1,61102142   | 1,35E+01 | 2,36E-04 | 4,98E-03 | Abcg3    | 1,57  | Yes |
| ENSMUSG00000029304 | 3,41E-01  | 10,06874027  | 3,68E+01 | 1,34E-09 | 1,07E-07 | Spp1     | 1,27  | Yes |
| ENSMUSG00000029306 | -1,94E+00 | -3,107619243 | 1,50E+00 | 2,21E-01 | 5,50E-01 | lbsp     | 0,26  | No  |
| ENSMUSG00000029307 | -2,66E+00 | -3,033639428 | 2,81E+00 | 9,35E-02 | 3,83E-01 | Dmp1     | 0,16  | No  |
| ENSMUSG00000029309 | -1,94E+00 | -3,107619243 | 1,50E+00 | 2,21E-01 | 5,50E-01 | Sparcl1  | 0,26  | No  |
| ENSMUSG00000029310 | -1,23E-01 | 5,570187187  | 3,24E+00 | 7,17E-02 | 3,40E-01 | Nudt9    | 0,92  | No  |
| ENSMUSG00000029311 | 4,47E-02  | 6,496478883  | 5,08E-01 | 4,76E-01 | 7,64E-01 | Hsd17b11 | 1,03  | No  |
| ENSMUSG00000029312 | -2,37E-01 | 3,121920266  | 5,02E+00 | 2,51E-02 | 1,75E-01 | Klhl8    | 0,85  | No  |
| ENSMUSG00000029313 | 2,62E-02  | 8,038683673  | 2,02E-01 | 6,53E-01 | 8,78E-01 | Aff1     | 1,02  | No  |
| ENSMUSG00000029314 | -5,49E-01 | -0,946160388 | 1,62E+00 | 2,04E-01 | 5,50E-01 | Gpat3    | 0,68  | No  |
| ENSMUSG00000029319 | 3,33E-02  | 3,467911763  | 1,11E-01 | 7,39E-01 | 9,26E-01 | Coq2     | 1,02  | No  |
| ENSMUSG00000029321 | -1,94E+00 | -3,107619243 | 1,50E+00 | 2,21E-01 | 5,50E-01 | Slc10a6  | 0,26  | No  |
| ENSMUSG00000029322 | -6,06E-01 | -1,401314909 | 1,65E+00 | 1,99E-01 | 5,50E-01 | Plac8    | 0,66  | No  |
| ENSMUSG00000029326 | 1,15E-01  | 5,334531925  | 2,63E+00 | 1,05E-01 | 3,97E-01 | Enoph1   | 1,08  | No  |
| ENSMUSG00000029328 | 5,31E-02  | 6,896056013  | 7,54E-01 | 3,85E-01 | 6,86E-01 | Hnrnpdl  | 1,04  | No  |
| ENSMUSG00000029330 | 1,02E-01  | 4,279836518  | 1,43E+00 | 2,31E-01 | 5,50E-01 | Cds1     | 1,07  | No  |
| ENSMUSG00000029334 | 3,51E+00  | -2,71177175  | 5,33E+00 | 2,09E-02 | 1,56E-01 | Prkg2    | 11,35 | No  |
| ENSMUSG00000029338 | 1,74E-01  | 5,978606228  | 7,07E+00 | 7,85E-03 | 7,79E-02 | Antxr2   | 1,13  | No  |

|                    |           |              |           |          |          |               |      |     |
|--------------------|-----------|--------------|-----------|----------|----------|---------------|------|-----|
| ENSMUSG00000029343 | -3,09E-01 | -2,401424848 | 1,43E-01  | 7,05E-01 | 9,07E-01 | Crybb1        | 0,81 | No  |
| ENSMUSG00000029344 | 1,35E-01  | 5,071022092  | 3,35E+00  | 6,72E-02 | 3,26E-01 | Tpst2         | 1,10 | No  |
| ENSMUSG00000029345 | 4,60E-02  | 5,822018569  | 4,79E-01  | 4,89E-01 | 7,76E-01 | Tfip11        | 1,03 | No  |
| ENSMUSG00000029346 | -1,36E-01 | 3,920377942  | 2,27E+00  | 1,32E-01 | 4,56E-01 | Srrd          | 0,91 | No  |
| ENSMUSG00000029348 | -8,42E-01 | -2,896131633 | 3,89E-01  | 5,33E-01 | 8,06E-01 | Asphd2        | 0,56 | No  |
| ENSMUSG00000029352 | 1,62E+00  | -2,770658576 | 1,81E+00  | 1,79E-01 | 5,39E-01 | Crybb3        | 3,08 | No  |
| ENSMUSG00000029359 | -7,01E-01 | 1,24439205   | 1,51E+01  | 1,02E-04 | 2,45E-03 | Tesc          | 0,62 | Yes |
| ENSMUSG00000029360 | 1,31E-01  | 3,541926618  | 1,81E+00  | 1,78E-01 | 5,39E-01 | Gm9754        | 1,10 | No  |
| ENSMUSG00000029361 | -3,72E-02 | -2,497646819 | 1,83E-03  | 9,66E-01 | 1,00E+00 | Nos1          | 0,97 | No  |
| ENSMUSG00000029363 | 1,06E-01  | 5,225904303  | 2,17E+00  | 1,41E-01 | 4,74E-01 | Rfc5          | 1,08 | No  |
| ENSMUSG00000029364 | 2,38E-02  | 6,694969364  | 1,48E-01  | 7,00E-01 | 9,04E-01 | Wsb2          | 1,02 | No  |
| ENSMUSG00000029366 | 1,31E-01  | 7,079910826  | 4,65E+00  | 3,10E-02 | 2,03E-01 | Dck           | 1,09 | No  |
| ENSMUSG00000029368 | -3,83E-02 | -3,107651936 | -7,91E-11 | 1,00E+00 | 1,00E+00 | Alb           | 0,97 | No  |
| ENSMUSG00000029370 | -8,92E-01 | -1,600759188 | 2,43E+00  | 1,19E-01 | 4,30E-01 | Rassf6        | 0,54 | No  |
| ENSMUSG00000029371 | -1,51E+00 | -1,711552884 | 5,91E+00  | 1,50E-02 | 1,26E-01 | Cxcl5         | 0,35 | No  |
| ENSMUSG00000029372 | -9,41E-01 | 1,455496593  | 2,58E+01  | 3,86E-07 | 1,88E-05 | Ppbp          | 0,52 | Yes |
| ENSMUSG00000029373 | -1,48E-01 | 4,116726887  | 2,90E+00  | 8,85E-02 | 3,79E-01 | Pf4           | 0,90 | No  |
| ENSMUSG00000029375 | 9,01E-03  | -3,107646452 | -5,16E-10 | 1,00E+00 | 1,00E+00 | Cxcl15        | 1,01 | No  |
| ENSMUSG00000029376 | 8,68E-02  | 2,232982633  | 3,91E-01  | 5,32E-01 | 8,06E-01 | Mthfd2l       | 1,06 | No  |
| ENSMUSG00000029377 | -9,50E-01 | -2,497435104 | 7,90E-01  | 3,74E-01 | 6,75E-01 | Ereg          | 0,52 | No  |
| ENSMUSG00000029378 | 2,09E-01  | -1,088689795 | 2,14E-01  | 6,44E-01 | 8,72E-01 | Areg          | 1,16 | No  |
| ENSMUSG00000029379 | -1,12E+00 | 4,182603062  | 1,55E+02  | 1,36E-35 | 1,16E-32 | Cxcl3         | 0,46 | Yes |
| ENSMUSG00000029380 | -6,64E-01 | 1,877240199  | 1,73E+01  | 3,15E-05 | 9,14E-04 | Cxcl1         | 0,63 | Yes |
| ENSMUSG00000029381 | -7,99E-01 | 1,664563082  | 2,37E+01  | 1,13E-06 | 4,95E-05 | Shroom3       | 0,57 | Yes |
| ENSMUSG00000029384 | -9,73E-01 | -2,497528941 | 8,29E-01  | 3,63E-01 | 6,64E-01 | 2010109A12Rik | 0,51 | No  |
| ENSMUSG00000029385 | 5,51E-02  | 5,388925808  | 6,28E-01  | 4,28E-01 | 7,22E-01 | Ccng2         | 1,04 | No  |
| ENSMUSG00000029386 | 9,17E-01  | -0,344578425 | 7,34E+00  | 6,73E-03 | 6,98E-02 | Tctn2         | 1,89 | No  |
| ENSMUSG00000029387 | -3,27E-03 | 3,174312588  | 9,29E-04  | 9,76E-01 | 1,00E+00 | Gtf2h3        | 1,00 | No  |
| ENSMUSG00000029388 | 2,54E-02  | 4,402093155  | 9,65E-02  | 7,56E-01 | 9,35E-01 | Eif2b1        | 1,02 | No  |
| ENSMUSG00000029389 | -6,85E-02 | 4,012120552  | 6,09E-01  | 4,35E-01 | 7,28E-01 | Ddx55         | 0,95 | No  |
| ENSMUSG00000029390 | 4,66E-02  | 7,448856292  | 6,14E-01  | 4,33E-01 | 7,27E-01 | Tmed2         | 1,03 | No  |
| ENSMUSG00000029392 | 6,82E-02  | 2,010892562  | 2,05E-01  | 6,51E-01 | 8,76E-01 | Rilpl1        | 1,05 | No  |

|                    |           |              |          |          |          |          |      |     |
|--------------------|-----------|--------------|----------|----------|----------|----------|------|-----|
| ENSMUSG00000029394 | -1,76E-02 | 5,787143928  | 6,95E-02 | 7,92E-01 | 9,55E-01 | Cdk2ap1  | 0,99 | No  |
| ENSMUSG00000029397 | -1,67E-01 | 5,450729475  | 5,81E+00 | 1,59E-02 | 1,31E-01 | Rchy1    | 0,89 | No  |
| ENSMUSG00000029401 | -2,22E-01 | 6,298676995  | 1,21E+01 | 5,01E-04 | 9,19E-03 | Rilpl2   | 0,86 | Yes |
| ENSMUSG00000029402 | -9,48E-02 | 3,680128666  | 9,82E-01 | 3,22E-01 | 6,22E-01 | Snrnp35  | 0,94 | No  |
| ENSMUSG00000029403 | 8,73E-02  | 4,711831595  | 1,25E+00 | 2,63E-01 | 5,58E-01 | Cdkl2    | 1,06 | No  |
| ENSMUSG00000029404 | -6,12E-02 | 4,843859519  | 6,51E-01 | 4,20E-01 | 7,15E-01 | Arl6ip4  | 0,96 | No  |
| ENSMUSG00000029405 | 8,29E-02  | 7,188637975  | 1,90E+00 | 1,68E-01 | 5,22E-01 | G3bp2    | 1,06 | No  |
| ENSMUSG00000029406 | 2,18E-01  | 1,58960721   | 1,51E+00 | 2,19E-01 | 5,50E-01 | Pitpnm2  | 1,16 | No  |
| ENSMUSG00000029407 | 8,17E-02  | 6,79877757   | 1,77E+00 | 1,83E-01 | 5,46E-01 | Uso1     | 1,06 | No  |
| ENSMUSG00000029408 | 5,21E-01  | 1,171856953  | 6,82E+00 | 9,04E-03 | 8,66E-02 | Abcb9    | 1,43 | No  |
| ENSMUSG00000029409 | 8,13E-01  | -2,711681644 | 5,75E-01 | 4,48E-01 | 7,39E-01 | U90926   | 1,76 | No  |
| ENSMUSG00000029410 | 8,18E-01  | 4,016383161  | 8,45E+01 | 3,91E-20 | 8,94E-18 | Ppef2    | 1,76 | Yes |
| ENSMUSG00000029413 | 3,64E-01  | 9,609674033  | 4,12E+01 | 1,36E-10 | 1,26E-08 | Naaa     | 1,29 | Yes |
| ENSMUSG00000029414 | 1,60E-01  | 4,929128684  | 4,52E+00 | 3,36E-02 | 2,15E-01 | Kntc1    | 1,12 | No  |
| ENSMUSG00000029415 | 3,20E-01  | 6,019806239  | 2,39E+01 | 1,03E-06 | 4,56E-05 | Sdad1    | 1,25 | Yes |
| ENSMUSG00000029416 | -3,45E-02 | 5,748859956  | 2,64E-01 | 6,07E-01 | 8,50E-01 | Slc15a4  | 0,98 | No  |
| ENSMUSG00000029417 | -8,43E-01 | -1,997964856 | 1,93E+00 | 1,65E-01 | 5,17E-01 | Cxcl9    | 0,56 | No  |
| ENSMUSG00000029419 | -1,57E+00 | -2,627595555 | 1,63E+00 | 2,01E-01 | 5,50E-01 | Gm996    | 0,34 | No  |
| ENSMUSG00000029422 | -3,83E-02 | 6,008780741  | 3,42E-01 | 5,59E-01 | 8,22E-01 | Rsrc2    | 0,97 | No  |
| ENSMUSG00000029426 | 2,79E-02  | 7,295966542  | 2,18E-01 | 6,41E-01 | 8,70E-01 | Scarb2   | 1,02 | No  |
| ENSMUSG00000029427 | 6,02E-02  | 5,491348572  | 7,59E-01 | 3,84E-01 | 6,85E-01 | Zcchc8   | 1,04 | No  |
| ENSMUSG00000029428 | 1,98E-01  | 6,265657104  | 9,60E+00 | 1,94E-03 | 2,74E-02 | Stx2     | 1,15 | Yes |
| ENSMUSG00000029430 | 1,26E-03  | 6,717481235  | 4,15E-04 | 9,84E-01 | 1,00E+00 | Ran      | 1,00 | No  |
| ENSMUSG00000029431 | -3,82E-01 | 0,490089022  | 2,53E+00 | 1,11E-01 | 4,10E-01 | B3gnt4   | 0,77 | No  |
| ENSMUSG00000029432 | -1,72E-02 | 5,350374031  | 5,98E-02 | 8,07E-01 | 9,64E-01 | Nipsnap2 | 0,99 | No  |
| ENSMUSG00000029433 | -2,10E-01 | 5,551010397  | 9,46E+00 | 2,10E-03 | 2,91E-02 | Diablo   | 0,86 | Yes |
| ENSMUSG00000029434 | 1,85E-01  | 6,266350944  | 8,42E+00 | 3,71E-03 | 4,48E-02 | Vps33a   | 1,14 | Yes |
| ENSMUSG00000029436 | 1,80E-01  | -2,033553032 | 4,83E-02 | 8,26E-01 | 9,75E-01 | Mmp17    | 1,13 | No  |
| ENSMUSG00000029438 | -1,20E-01 | 2,613465627  | 9,23E-01 | 3,37E-01 | 6,37E-01 | Bcl7a    | 0,92 | No  |
| ENSMUSG00000029439 | 6,14E-02  | 5,924835748  | 8,68E-01 | 3,51E-01 | 6,53E-01 | Sfswap   | 1,04 | No  |
| ENSMUSG00000029440 | 6,01E-02  | 4,574301739  | 5,63E-01 | 4,53E-01 | 7,43E-01 | Psmc9    | 1,04 | No  |
| ENSMUSG00000029442 | -3,48E-01 | -1,136418795 | 6,82E-01 | 4,09E-01 | 7,05E-01 | Wdr66    | 0,79 | No  |

|                    |           |             |          |          |          |          |      |     |
|--------------------|-----------|-------------|----------|----------|----------|----------|------|-----|
| ENSMUSG00000029446 | -4,23E-02 | 3,661320691 | 1,93E-01 | 6,60E-01 | 8,82E-01 | Psph     | 0,97 | No  |
| ENSMUSG00000029447 | 1,88E-02  | 7,057208932 | 9,71E-02 | 7,55E-01 | 9,34E-01 | Cct6a    | 1,01 | No  |
| ENSMUSG00000029449 | -2,51E-01 | 4,833668029 | 1,10E+01 | 9,02E-04 | 1,49E-02 | Rhof     | 0,84 | Yes |
| ENSMUSG00000029452 | -2,61E-02 | 4,346603675 | 9,88E-02 | 7,53E-01 | 9,33E-01 | Tmem116  | 0,98 | No  |
| ENSMUSG00000029454 | -8,77E-02 | 4,11235953  | 1,03E+00 | 3,10E-01 | 6,08E-01 | Mapkapk5 | 0,94 | No  |
| ENSMUSG00000029455 | 1,10E-02  | 7,761286262 | 3,51E-02 | 8,51E-01 | 9,90E-01 | Aldh2    | 1,01 | No  |
| ENSMUSG00000029456 | -2,85E-02 | 2,320911856 | 4,52E-02 | 8,32E-01 | 9,78E-01 | Acad10   | 0,98 | No  |
| ENSMUSG00000029458 | 3,56E-02  | 6,35804515  | 3,15E-01 | 5,75E-01 | 8,34E-01 | Brap     | 1,02 | No  |
| ENSMUSG00000029461 | -3,73E-03 | 6,262636371 | 3,42E-03 | 9,53E-01 | 1,00E+00 | Fam168a  | 1,00 | No  |
| ENSMUSG00000029462 | -8,54E-02 | 6,427067687 | 1,83E+00 | 1,76E-01 | 5,35E-01 | Vps29    | 0,94 | No  |
| ENSMUSG00000029463 | -1,05E-01 | 1,686199866 | 3,82E-01 | 5,37E-01 | 8,08E-01 | Fam216a  | 0,93 | No  |
| ENSMUSG00000029464 | -6,91E-02 | 3,831568614 | 5,62E-01 | 4,53E-01 | 7,43E-01 | Gpn3     | 0,95 | No  |
| ENSMUSG00000029465 | -1,08E-01 | 7,259928609 | 3,26E+00 | 7,12E-02 | 3,38E-01 | Arpc3    | 0,93 | No  |
| ENSMUSG00000029466 | 9,24E-02  | 4,867072576 | 1,50E+00 | 2,20E-01 | 5,50E-01 | Anapc7   | 1,07 | No  |
| ENSMUSG00000029467 | 1,04E-01  | 7,967797115 | 3,16E+00 | 7,57E-02 | 3,50E-01 | Atp2a2   | 1,07 | No  |
| ENSMUSG00000029468 | 4,27E-02  | 5,809247618 | 4,10E-01 | 5,22E-01 | 8,00E-01 | P2rx7    | 1,03 | No  |
| ENSMUSG00000029469 | 2,02E-01  | -1,22633501 | 2,08E-01 | 6,48E-01 | 8,75E-01 | Ift81    | 1,15 | No  |
| ENSMUSG00000029470 | -6,03E-02 | 7,329647443 | 1,02E+00 | 3,12E-01 | 6,12E-01 | P2rx4    | 0,96 | No  |
| ENSMUSG00000029471 | 8,77E-02  | 6,370867387 | 1,91E+00 | 1,67E-01 | 5,20E-01 | Camkk2   | 1,06 | No  |
| ENSMUSG00000029472 | 1,02E-01  | 6,873322849 | 2,77E+00 | 9,60E-02 | 3,87E-01 | Anapc5   | 1,07 | No  |
| ENSMUSG00000029474 | 3,50E-04  | 5,173321858 | 2,37E-05 | 9,96E-01 | 1,00E+00 | Rnf34    | 1,00 | No  |
| ENSMUSG00000029475 | -5,77E-02 | 5,815895327 | 7,55E-01 | 3,85E-01 | 6,86E-01 | Kdm2b    | 0,96 | No  |
| ENSMUSG00000029477 | -3,46E-01 | 1,607666702 | 3,90E+00 | 4,83E-02 | 2,64E-01 | Morn3    | 0,79 | No  |
| ENSMUSG00000029478 | 1,21E-01  | 7,418714332 | 4,16E+00 | 4,15E-02 | 2,42E-01 | Ncor2    | 1,09 | No  |
| ENSMUSG00000029480 | 1,63E-02  | 4,624175319 | 4,29E-02 | 8,36E-01 | 9,80E-01 | Dhx37    | 1,01 | No  |
| ENSMUSG00000029482 | 2,01E-01  | 5,683709786 | 8,84E+00 | 2,95E-03 | 3,79E-02 | Aacs     | 1,15 | Yes |
| ENSMUSG00000029484 | -3,40E-01 | 7,3499036   | 3,25E+01 | 1,20E-08 | 8,24E-07 | Anxa3    | 0,79 | Yes |
| ENSMUSG00000029486 | -1,31E-01 | 3,14477309  | 1,44E+00 | 2,30E-01 | 5,50E-01 | Mrpl1    | 0,91 | No  |
| ENSMUSG00000029490 | 4,85E-02  | 4,723560159 | 3,96E-01 | 5,29E-01 | 8,05E-01 | Mfsd7a   | 1,03 | No  |
| ENSMUSG00000029491 | 6,59E-01  | -1,44863151 | 1,28E+00 | 2,58E-01 | 5,51E-01 | Pde6b    | 1,58 | No  |
| ENSMUSG00000029499 | -5,74E-01 | 1,824835753 | 1,39E+01 | 1,88E-04 | 4,13E-03 | Pxmp2    | 0,67 | Yes |
| ENSMUSG00000029500 | 5,35E-02  | 4,480720204 | 4,47E-01 | 5,04E-01 | 7,89E-01 | Pgam5    | 1,04 | No  |

|                    |           |              |           |          |          |         |      |     |
|--------------------|-----------|--------------|-----------|----------|----------|---------|------|-----|
| ENSMUSG00000029501 | 8,93E-02  | 6,309125093  | 1,97E+00  | 1,60E-01 | 5,08E-01 | Ankle2  | 1,06 | No  |
| ENSMUSG00000029502 | 1,08E-01  | 5,984818158  | 2,74E+00  | 9,79E-02 | 3,91E-01 | Golga3  | 1,08 | No  |
| ENSMUSG00000029503 | -8,90E-02 | -2,107639497 | 1,28E-02  | 9,10E-01 | 1,00E+00 | P2rx2   | 0,94 | No  |
| ENSMUSG00000029504 | 1,72E-02  | 4,522008278  | 4,57E-02  | 8,31E-01 | 9,77E-01 | Ddx51   | 1,01 | No  |
| ENSMUSG00000029505 | 8,83E-02  | 7,256520482  | 2,17E+00  | 1,41E-01 | 4,74E-01 | Ep400   | 1,06 | No  |
| ENSMUSG00000029507 | -2,67E-02 | 4,686148255  | 1,16E-01  | 7,34E-01 | 9,23E-01 | Pus1    | 0,98 | No  |
| ENSMUSG00000029510 | 3,92E-01  | -0,2522571   | 1,51E+00  | 2,19E-01 | 5,50E-01 | Gpc2    | 1,31 | No  |
| ENSMUSG00000029512 | 6,20E-03  | 5,234143828  | 7,52E-03  | 9,31E-01 | 1,00E+00 | Ulk1    | 1,00 | No  |
| ENSMUSG00000029513 | 4,56E-02  | 5,00164326   | 3,79E-01  | 5,38E-01 | 8,09E-01 | Prkab1  | 1,03 | No  |
| ENSMUSG00000029516 | 2,25E-01  | 4,82222718   | 8,68E+00  | 3,21E-03 | 4,04E-02 | Cit     | 1,17 | Yes |
| ENSMUSG00000029517 | 1,21E+00  | -2,832024207 | 9,06E-01  | 3,41E-01 | 6,42E-01 | Ankrd7  | 2,31 | No  |
| ENSMUSG00000029518 | 4,85E-02  | 7,029744225  | 6,42E-01  | 4,23E-01 | 7,18E-01 | Rab35   | 1,03 | No  |
| ENSMUSG00000029521 | 2,04E-01  | 4,333991778  | 6,03E+00  | 1,41E-02 | 1,20E-01 | Chek2   | 1,15 | No  |
| ENSMUSG00000029522 | 9,01E-03  | -3,107646452 | -5,16E-10 | 1,00E+00 | 1,00E+00 | Pla2g1b | 1,01 | No  |
| ENSMUSG00000029524 | -1,26E-01 | 2,571363262  | 1,03E+00  | 3,10E-01 | 6,09E-01 | Sirt4   | 0,92 | No  |
| ENSMUSG00000029528 | 7,48E-03  | 7,687759275  | 1,62E-02  | 8,99E-01 | 1,00E+00 | Pxn     | 1,01 | No  |
| ENSMUSG00000029530 | 1,27E-01  | -0,012784731 | 1,86E-01  | 6,67E-01 | 8,86E-01 | Ccr9    | 1,09 | No  |
| ENSMUSG00000029534 | 2,83E-01  | 5,485826176  | 1,64E+01  | 5,14E-05 | 1,39E-03 | St7     | 1,22 | Yes |
| ENSMUSG00000029535 | 4,35E-02  | 5,297402389  | 3,78E-01  | 5,39E-01 | 8,09E-01 | Triap1  | 1,03 | No  |
| ENSMUSG00000029536 | -1,13E-02 | 4,782623137  | 2,18E-02  | 8,83E-01 | 1,00E+00 | Gatc    | 0,99 | No  |
| ENSMUSG00000029538 | 1,88E-02  | 5,924008313  | 8,15E-02  | 7,75E-01 | 9,45E-01 | Srsf9   | 1,01 | No  |
| ENSMUSG00000029541 | -1,27E-01 | -2,896123576 | 1,17E-02  | 9,14E-01 | 1,00E+00 | Cyp2w1  | 0,92 | No  |
| ENSMUSG00000029544 | -3,66E-02 | -2,896156051 | 8,10E-04  | 9,77E-01 | 1,00E+00 | Cabp1   | 0,97 | No  |
| ENSMUSG00000029545 | -9,12E-03 | 5,344739193  | 1,68E-02  | 8,97E-01 | 1,00E+00 | Acads   | 0,99 | No  |
| ENSMUSG00000029547 | 1,07E-01  | 6,221790426  | 2,76E+00  | 9,65E-02 | 3,88E-01 | Ints1   | 1,08 | No  |
| ENSMUSG00000029550 | 5,96E-02  | 5,390231476  | 7,29E-01  | 3,93E-01 | 6,93E-01 | Sppl3   | 1,04 | No  |
| ENSMUSG00000029551 | -1,97E-01 | 3,279631706  | 3,55E+00  | 5,96E-02 | 3,02E-01 | Psmg3   | 0,87 | No  |
| ENSMUSG00000029552 | -3,71E-01 | 8,090275184  | 4,09E+01  | 1,62E-10 | 1,48E-08 | Tes     | 0,77 | Yes |
| ENSMUSG00000029553 | 2,71E-01  | 6,49259695   | 1,85E+01  | 1,66E-05 | 5,25E-04 | Tfec    | 1,21 | Yes |
| ENSMUSG00000029554 | -8,46E-03 | 4,796064908  | 1,21E-02  | 9,12E-01 | 1,00E+00 | Mad11l  | 0,99 | No  |
| ENSMUSG00000029556 | 8,11E-01  | -2,600686135 | 4,63E-01  | 4,96E-01 | 7,81E-01 | Hnf1a   | 1,75 | No  |
| ENSMUSG00000029557 | -3,73E-02 | 2,689981074  | 9,48E-02  | 7,58E-01 | 9,36E-01 | Mrm2    | 0,97 | No  |



|                    |           |              |          |          |          |               |      |     |
|--------------------|-----------|--------------|----------|----------|----------|---------------|------|-----|
| ENSMUSG00000029559 | -7,11E-02 | 4,102639325  | 6,64E-01 | 4,15E-01 | 7,10E-01 | 2210016L21Rik | 0,95 | No  |
| ENSMUSG00000029560 | 1,31E-01  | 7,034300832  | 4,66E+00 | 3,10E-02 | 2,03E-01 | Snx8          | 1,09 | No  |
| ENSMUSG00000029561 | -2,13E-01 | 4,179769682  | 6,47E+00 | 1,10E-02 | 9,98E-02 | Oasl2         | 0,86 | No  |
| ENSMUSG00000029569 | 9,35E-02  | 6,88343851   | 2,35E+00 | 1,26E-01 | 4,44E-01 | Tmem168       | 1,07 | No  |
| ENSMUSG00000029570 | -2,96E-02 | 6,585811756  | 2,28E-01 | 6,33E-01 | 8,65E-01 | Lfng          | 0,98 | No  |
| ENSMUSG00000029571 | -1,41E-02 | 6,148358153  | 4,76E-02 | 8,27E-01 | 9,76E-01 | Tmem106b      | 0,99 | No  |
| ENSMUSG00000029575 | 6,40E-02  | 3,296262193  | 3,79E-01 | 5,38E-01 | 8,09E-01 | Mmab          | 1,05 | No  |
| ENSMUSG00000029576 | 5,60E-02  | 2,448610982  | 1,80E-01 | 6,72E-01 | 8,89E-01 | Radil         | 1,04 | No  |
| ENSMUSG00000029577 | 8,19E-02  | 6,688418907  | 1,76E+00 | 1,85E-01 | 5,49E-01 | Ube3b         | 1,06 | No  |
| ENSMUSG00000029578 | 2,01E-02  | 5,690726321  | 8,96E-02 | 7,65E-01 | 9,39E-01 | Wipi2         | 1,01 | No  |
| ENSMUSG00000029580 | -9,19E-02 | 12,30676656  | 2,72E+00 | 9,91E-02 | 3,92E-01 | Actb          | 0,94 | No  |
| ENSMUSG00000029581 | -9,11E-01 | 8,708448587  | 2,50E+02 | 2,59E-56 | 1,11E-52 | Fscn1         | 0,53 | Yes |
| ENSMUSG00000029587 | -2,31E-02 | 3,553583612  | 5,69E-02 | 8,11E-01 | 9,67E-01 | Zfp12         | 0,98 | No  |
| ENSMUSG00000029591 | 3,46E-01  | 3,529890412  | 1,20E+01 | 5,44E-04 | 9,84E-03 | Ung           | 1,27 | Yes |
| ENSMUSG00000029592 | 7,44E-02  | 4,904670706  | 9,87E-01 | 3,20E-01 | 6,21E-01 | Usp30         | 1,05 | No  |
| ENSMUSG00000029594 | 2,42E-01  | 3,985971414  | 7,34E+00 | 6,75E-03 | 7,00E-02 | Rbm19         | 1,18 | No  |
| ENSMUSG00000029595 | 1,26E+00  | -2,770612189 | 9,82E-01 | 3,22E-01 | 6,22E-01 | Lhx5          | 2,39 | No  |
| ENSMUSG00000029596 | 8,95E-01  | -1,655141883 | 1,77E+00 | 1,84E-01 | 5,48E-01 | Sdsl          | 1,86 | No  |
| ENSMUSG00000029597 | 7,68E-01  | -1,257710393 | 2,28E+00 | 1,31E-01 | 4,55E-01 | Sds           | 1,70 | No  |
| ENSMUSG00000029598 | 1,70E-01  | 6,430474976  | 7,17E+00 | 7,42E-03 | 7,49E-02 | Plbd2         | 1,12 | No  |
| ENSMUSG00000029599 | -1,00E-03 | 6,417994668  | 2,53E-04 | 9,87E-01 | 1,00E+00 | Ddx54         | 1,00 | No  |
| ENSMUSG00000029600 | -1,67E-02 | 2,271470047  | 1,35E-02 | 9,07E-01 | 1,00E+00 | Rita1         | 0,99 | No  |
| ENSMUSG00000029601 | -6,10E-01 | -0,937529913 | 1,93E+00 | 1,65E-01 | 5,18E-01 | lqcd          | 0,66 | No  |
| ENSMUSG00000029602 | -6,05E-01 | 2,08393318   | 1,84E+01 | 1,78E-05 | 5,57E-04 | Rasal1        | 0,66 | Yes |
| ENSMUSG00000029603 | -7,37E-01 | -0,069959706 | 6,45E+00 | 1,11E-02 | 1,01E-01 | Dtx1          | 0,60 | No  |
| ENSMUSG00000029605 | 8,20E-02  | 1,281080627  | 1,97E-01 | 6,57E-01 | 8,80E-01 | Oas1b         | 1,06 | No  |
| ENSMUSG00000029607 | -2,45E-01 | 2,333986868  | 3,13E+00 | 7,69E-02 | 3,54E-01 | Ankrd61       | 0,84 | No  |
| ENSMUSG00000029608 | 2,89E-02  | -1,401357317 | 2,63E-03 | 9,59E-01 | 1,00E+00 | Rph3a         | 1,02 | No  |
| ENSMUSG00000029610 | 2,16E-01  | 4,008874098  | 5,92E+00 | 1,49E-02 | 1,25E-01 | Aimp2         | 1,16 | No  |
| ENSMUSG00000029613 | 1,07E-01  | 6,224023547  | 2,76E+00 | 9,68E-02 | 3,88E-01 | Eif2ak1       | 1,08 | No  |
| ENSMUSG00000029614 | -2,26E-01 | 6,709297813  | 1,35E+01 | 2,43E-04 | 5,11E-03 | Rpl6          | 0,85 | Yes |
| ENSMUSG00000029616 | -8,05E-03 | 7,979385351  | 1,91E-02 | 8,90E-01 | 1,00E+00 | Erp29         | 0,99 | No  |

|                    |           |              |           |          |          |          |      |     |
|--------------------|-----------|--------------|-----------|----------|----------|----------|------|-----|
| ENSMUSG00000029617 | -7,98E-02 | 5,468114426  | 1,32E+00  | 2,50E-01 | 5,50E-01 | Ccz1     | 0,95 | No  |
| ENSMUSG00000029621 | -2,23E-02 | 6,07870667   | 1,18E-01  | 7,32E-01 | 9,22E-01 | Arpc1a   | 0,98 | No  |
| ENSMUSG00000029622 | 7,87E-02  | 8,784393948  | 1,90E+00  | 1,68E-01 | 5,23E-01 | Arpc1b   | 1,06 | No  |
| ENSMUSG00000029623 | -3,31E-02 | 5,681937478  | 2,39E-01  | 6,25E-01 | 8,59E-01 | Pdap1    | 0,98 | No  |
| ENSMUSG00000029624 | -9,68E-02 | 5,163151459  | 1,83E+00  | 1,76E-01 | 5,35E-01 | Ptcd1    | 0,94 | No  |
| ENSMUSG00000029625 | -3,00E-02 | 4,782971085  | 1,56E-01  | 6,93E-01 | 9,01E-01 | Cpsf4    | 0,98 | No  |
| ENSMUSG00000029627 | -8,49E-02 | 3,140106988  | 6,25E-01  | 4,29E-01 | 7,23E-01 | Zkscan14 | 0,94 | No  |
| ENSMUSG00000029629 | 6,16E-02  | 4,799568095  | 6,50E-01  | 4,20E-01 | 7,15E-01 | Phf14    | 1,04 | No  |
| ENSMUSG00000029632 | -8,61E-02 | 4,877388731  | 1,30E+00  | 2,54E-01 | 5,50E-01 | Ndufa4   | 0,94 | No  |
| ENSMUSG00000029633 | 7,03E-02  | 5,816166796  | 1,11E+00  | 2,93E-01 | 5,88E-01 | Gm5578   | 1,05 | No  |
| ENSMUSG00000029634 | 5,52E-02  | 6,036611221  | 7,14E-01  | 3,98E-01 | 6,98E-01 | Rnf6     | 1,04 | No  |
| ENSMUSG00000029635 | 7,69E-02  | 5,643728719  | 1,28E+00  | 2,57E-01 | 5,50E-01 | Cdk8     | 1,05 | No  |
| ENSMUSG00000029638 | -9,71E-02 | 3,818090897  | 1,15E+00  | 2,84E-01 | 5,80E-01 | Glcci1   | 0,93 | No  |
| ENSMUSG00000029640 | -9,67E-02 | 6,606760425  | 2,42E+00  | 1,20E-01 | 4,30E-01 | Usp12    | 0,94 | No  |
| ENSMUSG00000029641 | 1,29E-01  | -2,070130265 | 3,70E-02  | 8,47E-01 | 9,88E-01 | Rasl11a  | 1,09 | No  |
| ENSMUSG00000029642 | -5,88E-02 | 5,977141082  | 8,04E-01  | 3,70E-01 | 6,71E-01 | Polr1d   | 0,96 | No  |
| ENSMUSG00000029647 | -3,99E-02 | 6,331125474  | 3,97E-01  | 5,29E-01 | 8,04E-01 | Pan3     | 0,97 | No  |
| ENSMUSG00000029648 | 4,60E-01  | 4,720860982  | 3,45E+01  | 4,21E-09 | 3,10E-07 | Flt1     | 1,38 | Yes |
| ENSMUSG00000029649 | -9,30E-02 | 6,10644109   | 2,06E+00  | 1,51E-01 | 4,93E-01 | Pomp     | 0,94 | No  |
| ENSMUSG00000029650 | -2,90E-02 | 4,798115959  | 1,46E-01  | 7,02E-01 | 9,05E-01 | Slc46a3  | 0,98 | No  |
| ENSMUSG00000029651 | 4,09E-02  | 0,970980766  | 3,76E-02  | 8,46E-01 | 9,87E-01 | Mtus2    | 1,03 | No  |
| ENSMUSG00000029655 | -3,62E-03 | 5,423506516  | 2,69E-03  | 9,59E-01 | 1,00E+00 | N4bp2l2  | 1,00 | No  |
| ENSMUSG00000029656 | -3,83E-02 | -3,107651936 | -7,91E-11 | 1,00E+00 | 1,00E+00 | C8b      | 0,97 | No  |
| ENSMUSG00000029657 | -1,12E-01 | 5,694747905  | 2,79E+00  | 9,49E-02 | 3,86E-01 | Hsph1    | 0,93 | No  |
| ENSMUSG00000029658 | -6,52E-02 | -2,355526694 | 5,88E-03  | 9,39E-01 | 1,00E+00 | Wdr95    | 0,96 | No  |
| ENSMUSG00000029659 | -1,21E+00 | -3,107627547 | 6,96E-01  | 4,04E-01 | 7,01E-01 | Medag    | 0,43 | No  |
| ENSMUSG00000029660 | 4,45E-01  | -2,600697781 | 1,54E-01  | 6,94E-01 | 9,02E-01 | Tex26    | 1,36 | No  |
| ENSMUSG00000029661 | -1,96E+00 | -0,164849413 | 3,04E+01  | 3,56E-08 | 2,18E-06 | Col1a2   | 0,26 | Yes |
| ENSMUSG00000029664 | -5,71E-01 | -1,711801441 | 7,13E-01  | 3,99E-01 | 6,98E-01 | Tfpi2    | 0,67 | No  |
| ENSMUSG00000029669 | -7,69E-02 | -2,963220349 | 2,69E-03  | 9,59E-01 | 1,00E+00 | Tspan12  | 0,95 | No  |
| ENSMUSG00000029670 | 9,25E-02  | 3,92067186   | 1,04E+00  | 3,08E-01 | 6,06E-01 | Ing3     | 1,07 | No  |
| ENSMUSG00000029671 | 1,13E-01  | -0,641325321 | 9,50E-02  | 7,58E-01 | 9,35E-01 | Wnt16    | 1,08 | No  |

|                    |           |              |           |          |          |         |      |     |
|--------------------|-----------|--------------|-----------|----------|----------|---------|------|-----|
| ENSMUSG00000029672 | 1,68E-01  | 5,981197511  | 6,52E+00  | 1,06E-02 | 9,78E-02 | Fam3c   | 1,12 | No  |
| ENSMUSG00000029673 | -8,26E-01 | -0,832084513 | 4,32E+00  | 3,77E-02 | 2,31E-01 | Auts2   | 0,56 | No  |
| ENSMUSG00000029674 | 9,01E-02  | 5,82444536   | 1,83E+00  | 1,76E-01 | 5,35E-01 | Limk1   | 1,06 | No  |
| ENSMUSG00000029676 | 1,55E-01  | 3,867776533  | 2,99E+00  | 8,39E-02 | 3,71E-01 | Pot1a   | 1,11 | No  |
| ENSMUSG00000029681 | 6,56E-03  | 4,520197322  | 6,69E-03  | 9,35E-01 | 1,00E+00 | Bcl7b   | 1,00 | No  |
| ENSMUSG00000029683 | 1,81E+00  | -3,10765737  | 1,28E+00  | 2,58E-01 | 5,50E-01 | Lmod2   | 3,49 | No  |
| ENSMUSG00000029684 | -1,46E-01 | 5,082859055  | 3,96E+00  | 4,65E-02 | 2,57E-01 | Wasl    | 0,90 | No  |
| ENSMUSG00000029685 | 9,01E-03  | -3,107646452 | -5,16E-10 | 1,00E+00 | 1,00E+00 | Asb15   | 1,01 | No  |
| ENSMUSG00000029686 | 2,51E-02  | 6,540424633  | 1,62E-01  | 6,88E-01 | 8,98E-01 | Cul1    | 1,02 | No  |
| ENSMUSG00000029687 | 9,80E-02  | 5,242117596  | 1,92E+00  | 1,66E-01 | 5,19E-01 | Ezh2    | 1,07 | No  |
| ENSMUSG00000029699 | 5,76E-01  | 1,147835417  | 8,31E+00  | 3,94E-03 | 4,69E-02 | Ssc4d   | 1,49 | Yes |
| ENSMUSG00000029700 | -9,89E-01 | -1,311188054 | 4,04E+00  | 4,43E-02 | 2,51E-01 | Slc13a1 | 0,50 | No  |
| ENSMUSG00000029701 | 6,38E-02  | 5,31542707   | 8,07E-01  | 3,69E-01 | 6,70E-01 | Rbm28   | 1,05 | No  |
| ENSMUSG00000029703 | 5,29E-02  | 5,295201151  | 5,59E-01  | 4,55E-01 | 7,44E-01 | Lrwd1   | 1,04 | No  |
| ENSMUSG00000029705 | 1,65E-01  | 6,519682745  | 6,91E+00  | 8,58E-03 | 8,35E-02 | Cux1    | 1,12 | No  |
| ENSMUSG00000029707 | -1,88E-01 | -2,333243765 | 5,50E-02  | 8,15E-01 | 9,68E-01 | Fscn3   | 0,88 | No  |
| ENSMUSG00000029708 | 6,79E-02  | 4,432093798  | 7,11E-01  | 3,99E-01 | 6,98E-01 | Gcc1    | 1,05 | No  |
| ENSMUSG00000029710 | -1,36E+00 | -2,832027061 | 1,15E+00  | 2,83E-01 | 5,79E-01 | Ephb4   | 0,39 | No  |
| ENSMUSG00000029711 | 3,75E-02  | 2,031569547  | 6,20E-02  | 8,03E-01 | 9,62E-01 | Epo     | 1,03 | No  |
| ENSMUSG00000029712 | 3,10E-01  | -2,448675378 | 9,77E-02  | 7,55E-01 | 9,34E-01 | Actl6b  | 1,24 | No  |
| ENSMUSG00000029713 | 8,90E-02  | 8,340567944  | 2,38E+00  | 1,23E-01 | 4,38E-01 | Gnb2    | 1,06 | No  |
| ENSMUSG00000029714 | 5,56E-02  | 5,677227206  | 6,80E-01  | 4,09E-01 | 7,06E-01 | Gigyf1  | 1,04 | No  |
| ENSMUSG00000029715 | -3,00E-02 | 3,935851605  | 1,08E-01  | 7,43E-01 | 9,28E-01 | Pop7    | 0,98 | No  |
| ENSMUSG00000029716 | 7,61E-01  | -1,655145017 | 1,75E+00  | 1,85E-01 | 5,49E-01 | Tfr2    | 1,69 | No  |
| ENSMUSG00000029718 | -2,54E-01 | 1,14229476   | 1,75E+00  | 1,86E-01 | 5,50E-01 | Pcolce  | 0,84 | No  |
| ENSMUSG00000029720 | -1,01E-01 | 6,639100815  | 2,68E+00  | 1,02E-01 | 3,94E-01 | Gm20605 | 0,93 | No  |
| ENSMUSG00000029722 | 1,57E-01  | 5,516456616  | 5,17E+00  | 2,30E-02 | 1,66E-01 | Agfg2   | 1,11 | No  |
| ENSMUSG00000029723 | 1,03E-01  | 6,376547901  | 2,62E+00  | 1,06E-01 | 3,98E-01 | Tsc22d4 | 1,07 | No  |
| ENSMUSG00000029725 | -1,48E-01 | 3,625113984  | 2,34E+00  | 1,26E-01 | 4,44E-01 | Ppp1r35 | 0,90 | No  |
| ENSMUSG00000029726 | 6,48E-02  | 5,011474026  | 7,85E-01  | 3,76E-01 | 6,77E-01 | Mepce   | 1,05 | No  |
| ENSMUSG00000029727 | -7,57E-01 | -1,627694419 | 1,83E+00  | 1,76E-01 | 5,35E-01 | Cyp3a13 | 0,59 | No  |
| ENSMUSG00000029729 | 1,04E-01  | 4,288020577  | 1,56E+00  | 2,12E-01 | 5,50E-01 | Zkscan1 | 1,08 | No  |

|                    |           |              |          |          |          |           |      |     |
|--------------------|-----------|--------------|----------|----------|----------|-----------|------|-----|
| ENSMUSG00000029730 | 2,07E-01  | 5,126984503  | 8,10E+00 | 4,42E-03 | 5,09E-02 | Mcm7      | 1,15 | No  |
| ENSMUSG00000029735 | 1,52E-02  | 3,621958218  | 2,53E-02 | 8,74E-01 | 1,00E+00 | Tpk1      | 1,01 | No  |
| ENSMUSG00000029736 | 2,63E+00  | -2,963275836 | 2,67E+00 | 1,02E-01 | 3,94E-01 | Nobox     | 6,19 | No  |
| ENSMUSG00000029752 | 1,01E-01  | 3,519696564  | 1,03E+00 | 3,09E-01 | 6,07E-01 | Asns      | 1,07 | No  |
| ENSMUSG00000029754 | -1,94E+00 | -3,107619243 | 1,50E+00 | 2,21E-01 | 5,50E-01 | Dlx6      | 0,26 | No  |
| ENSMUSG00000029757 | -1,89E+00 | -3,1076441   | 1,42E+00 | 2,33E-01 | 5,50E-01 | Dync1i1   | 0,27 | No  |
| ENSMUSG00000029759 | 5,46E-02  | 5,056758807  | 5,47E-01 | 4,59E-01 | 7,48E-01 | Pon3      | 1,04 | No  |
| ENSMUSG00000029761 | 3,63E-01  | 3,215045644  | 1,12E+01 | 8,38E-04 | 1,40E-02 | Cald1     | 1,29 | Yes |
| ENSMUSG00000029762 | -2,27E-02 | 1,214460326  | 1,36E-02 | 9,07E-01 | 1,00E+00 | Akr1b8    | 0,98 | No  |
| ENSMUSG00000029763 | -6,88E-02 | 6,670128905  | 1,23E+00 | 2,67E-01 | 5,63E-01 | Exoc4     | 0,95 | No  |
| ENSMUSG00000029765 | -7,44E-01 | 0,851320911  | 1,15E+01 | 6,92E-04 | 1,20E-02 | Plxna4    | 0,60 | Yes |
| ENSMUSG00000029767 | 8,33E-02  | 7,201064042  | 1,92E+00 | 1,66E-01 | 5,18E-01 | Calu      | 1,06 | No  |
| ENSMUSG00000029769 | -7,46E-01 | -1,477090741 | 1,99E+00 | 1,58E-01 | 5,05E-01 | Ccdc136   | 0,60 | No  |
| ENSMUSG00000029771 | -4,25E-02 | 8,888998261  | 5,55E-01 | 4,56E-01 | 7,46E-01 | Irf5      | 0,97 | No  |
| ENSMUSG00000029772 | -7,16E-02 | 7,249929731  | 1,44E+00 | 2,31E-01 | 5,50E-01 | Ahcyl2    | 0,95 | No  |
| ENSMUSG00000029775 | 7,80E-02  | 6,048856767  | 1,43E+00 | 2,32E-01 | 5,50E-01 | Klhdc10   | 1,06 | No  |
| ENSMUSG00000029776 | -1,08E-01 | 5,96189348   | 2,71E+00 | 9,96E-02 | 3,92E-01 | Hibadh    | 0,93 | No  |
| ENSMUSG00000029777 | 8,41E-02  | 6,754606752  | 1,87E+00 | 1,72E-01 | 5,29E-01 | Gars      | 1,06 | No  |
| ENSMUSG00000029778 | -1,38E+00 | -2,896135155 | 1,20E+00 | 2,74E-01 | 5,71E-01 | Adcyap1r1 | 0,38 | No  |
| ENSMUSG00000029780 | -2,06E-02 | 4,1563599    | 5,79E-02 | 8,10E-01 | 9,66E-01 | Nt5c3     | 0,99 | No  |
| ENSMUSG00000029781 | -7,42E-02 | 2,915869613  | 4,04E-01 | 5,25E-01 | 8,02E-01 | Fkbp9     | 0,95 | No  |
| ENSMUSG00000029782 | 1,76E-01  | 4,482430481  | 4,79E+00 | 2,87E-02 | 1,92E-01 | Tmem209   | 1,13 | No  |
| ENSMUSG00000029784 | 1,85E+00  | -3,107657832 | 1,35E+00 | 2,46E-01 | 5,50E-01 | Ssmem1    | 3,61 | No  |
| ENSMUSG00000029787 | 3,01E-02  | 5,942545332  | 2,09E-01 | 6,47E-01 | 8,75E-01 | Avl9      | 1,02 | No  |
| ENSMUSG00000029788 | 1,81E+00  | -3,10765737  | 1,28E+00 | 2,58E-01 | 5,50E-01 | Cpa5      | 3,49 | No  |
| ENSMUSG00000029790 | 1,66E-01  | 2,144055562  | 1,33E+00 | 2,49E-01 | 5,50E-01 | Cep41     | 1,12 | No  |
| ENSMUSG00000029797 | -3,75E-01 | 3,863127635  | 1,70E+01 | 3,69E-05 | 1,05E-03 | Sspo      | 0,77 | Yes |
| ENSMUSG00000029798 | -4,19E-01 | 4,941354008  | 3,24E+01 | 1,27E-08 | 8,65E-07 | Herc6     | 0,75 | Yes |
| ENSMUSG00000029802 | 1,44E-01  | 2,926343055  | 1,57E+00 | 2,11E-01 | 5,50E-01 | Abcg2     | 1,11 | No  |
| ENSMUSG00000029804 | -9,78E-02 | 4,265244492  | 1,37E+00 | 2,41E-01 | 5,50E-01 | Herc3     | 0,93 | No  |
| ENSMUSG00000029810 | -6,57E-01 | 6,303087579  | 1,07E+02 | 3,96E-25 | 1,39E-22 | Tmem176b  | 0,63 | Yes |
| ENSMUSG00000029811 | -1,24E+00 | 2,38010976   | 8,74E+01 | 8,69E-21 | 2,08E-18 | Aoc1      | 0,42 | Yes |

|                    |           |              |          |          |          |               |      |     |
|--------------------|-----------|--------------|----------|----------|----------|---------------|------|-----|
| ENSMUSG00000029814 | 2,65E-02  | 2,742662085  | 4,60E-02 | 8,30E-01 | 9,77E-01 | Igf2bp3       | 1,02 | No  |
| ENSMUSG00000029815 | -1,56E-02 | 3,821363419  | 2,90E-02 | 8,65E-01 | 9,98E-01 | Malsu1        | 0,99 | No  |
| ENSMUSG00000029816 | -3,16E-01 | 11,85355917  | 3,21E+01 | 1,48E-08 | 9,81E-07 | Gpnmb         | 0,80 | Yes |
| ENSMUSG00000029817 | -8,14E-02 | 6,49940845   | 1,69E+00 | 1,93E-01 | 5,50E-01 | Tra2a         | 0,95 | No  |
| ENSMUSG00000029819 | 1,17E-01  | 1,771327436  | 5,40E-01 | 4,62E-01 | 7,51E-01 | Npy           | 1,08 | No  |
| ENSMUSG00000029821 | 1,15E-01  | 4,207363807  | 1,80E+00 | 1,79E-01 | 5,40E-01 | Dfna5         | 1,08 | No  |
| ENSMUSG00000029822 | -5,87E-03 | 5,034303559  | 6,25E-03 | 9,37E-01 | 1,00E+00 | Osbpl3        | 1,00 | No  |
| ENSMUSG00000029823 | -2,27E-02 | 7,852882755  | 1,51E-01 | 6,98E-01 | 9,04E-01 | Luc7l2        | 0,98 | No  |
| ENSMUSG00000029826 | -1,32E-02 | 7,465395251  | 5,00E-02 | 8,23E-01 | 9,73E-01 | Zc3hav1       | 0,99 | No  |
| ENSMUSG00000029828 | 1,05E+00  | -2,355660455 | 1,42E+00 | 2,33E-01 | 5,50E-01 | 4921507P07Rik | 2,07 | No  |
| ENSMUSG00000029830 | -1,14E-02 | -3,033635021 | 1,50E-05 | 9,97E-01 | 1,00E+00 | Svopl         | 0,99 | No  |
| ENSMUSG00000029832 | -2,53E-02 | 0,897016524  | 1,42E-02 | 9,05E-01 | 1,00E+00 | Nfe2l3        | 0,98 | No  |
| ENSMUSG00000029833 | -2,62E-01 | 4,926458891  | 1,25E+01 | 4,11E-04 | 7,78E-03 | Trim24        | 0,83 | Yes |
| ENSMUSG00000029836 | 1,28E-02  | 4,822936481  | 2,83E-02 | 8,66E-01 | 9,99E-01 | Cbx3          | 1,01 | No  |
| ENSMUSG00000029840 | 1,56E-01  | 9,219353552  | 7,55E+00 | 6,01E-03 | 6,43E-02 | Mtpn          | 1,11 | No  |
| ENSMUSG00000029843 | -3,20E+00 | -2,896154564 | 4,32E+00 | 3,77E-02 | 2,31E-01 | Slc13a4       | 0,11 | No  |
| ENSMUSG00000029844 | 8,65E-01  | -0,533559519 | 5,66E+00 | 1,73E-02 | 1,37E-01 | Hoxa1         | 1,82 | No  |
| ENSMUSG00000029847 | 1,82E+00  | -1,247131959 | 1,15E+01 | 7,04E-04 | 1,21E-02 | Slc23a4       | 3,54 | Yes |
| ENSMUSG00000029848 | -7,32E-02 | -2,033584538 | 1,25E-02 | 9,11E-01 | 1,00E+00 | Stra8         | 0,95 | No  |
| ENSMUSG00000029851 | -8,02E-01 | 2,301792773  | 3,77E+01 | 8,38E-10 | 6,94E-08 | Tcaf2         | 0,57 | Yes |
| ENSMUSG00000029859 | 4,17E-01  | 2,995441483  | 1,33E+01 | 2,72E-04 | 5,60E-03 | Epha1         | 1,34 | Yes |
| ENSMUSG00000029860 | 2,52E-01  | 10,1580286   | 2,00E+01 | 7,56E-06 | 2,61E-04 | Zyx           | 1,19 | Yes |
| ENSMUSG00000029861 | 3,34E-01  | -0,175683269 | 1,16E+00 | 2,82E-01 | 5,79E-01 | Fam131b       | 1,26 | No  |
| ENSMUSG00000029862 | 5,02E-01  | -1,015742876 | 1,14E+00 | 2,86E-01 | 5,82E-01 | Clcn1         | 1,42 | No  |
| ENSMUSG00000029863 | 1,96E-01  | 4,936679249  | 6,93E+00 | 8,49E-03 | 8,28E-02 | Casp2         | 1,15 | No  |
| ENSMUSG00000029864 | 6,99E-02  | 0,899454995  | 1,10E-01 | 7,40E-01 | 9,27E-01 | Gstk1         | 1,05 | No  |
| ENSMUSG00000029869 | 2,64E-01  | -1,963174724 | 1,45E-01 | 7,04E-01 | 9,06E-01 | Ephb6         | 1,20 | No  |
| ENSMUSG00000029875 | -2,33E+00 | -1,145933983 | 2,44E+01 | 7,87E-07 | 3,60E-05 | Ccdc184       | 0,20 | Yes |
| ENSMUSG00000029878 | 4,74E-01  | -2,832010425 | 1,77E-01 | 6,74E-01 | 8,90E-01 | Dbpht2        | 1,39 | No  |
| ENSMUSG00000029883 | -1,89E+00 | -3,1076441   | 1,42E+00 | 2,33E-01 | 5,50E-01 | 1700074P13Rik | 0,27 | No  |
| ENSMUSG00000029885 | 1,25E+00  | -2,832026261 | 9,70E-01 | 3,25E-01 | 6,25E-01 | Moxd2         | 2,38 | No  |
| ENSMUSG00000029909 | -5,49E-01 | -2,655145816 | 2,37E-01 | 6,27E-01 | 8,60E-01 | Prss37        | 0,68 | No  |

|                    |           |              |          |          |          |               |      |     |
|--------------------|-----------|--------------|----------|----------|----------|---------------|------|-----|
| ENSMUSG00000029910 | 1,90E-01  | 5,260151115  | 7,08E+00 | 7,79E-03 | 7,74E-02 | Mad2l1        | 1,14 | No  |
| ENSMUSG00000029911 | -1,26E-01 | 3,400278856  | 1,51E+00 | 2,19E-01 | 5,50E-01 | Ssbp1         | 0,92 | No  |
| ENSMUSG00000029913 | -8,16E-01 | -1,088752632 | 3,02E+00 | 8,24E-02 | 3,69E-01 | Prdm5         | 0,57 | No  |
| ENSMUSG00000029915 | 1,27E-01  | 6,035670187  | 3,71E+00 | 5,40E-02 | 2,84E-01 | Clec5a        | 1,09 | No  |
| ENSMUSG00000029916 | 5,00E-02  | 2,843894039  | 1,82E-01 | 6,70E-01 | 8,88E-01 | Agk           | 1,04 | No  |
| ENSMUSG00000029918 | 5,42E-03  | 3,51238464   | 3,05E-03 | 9,56E-01 | 1,00E+00 | Mrps33        | 1,00 | No  |
| ENSMUSG00000029919 | 1,45E-01  | 4,550837232  | 3,32E+00 | 6,86E-02 | 3,29E-01 | Hpgds         | 1,11 | No  |
| ENSMUSG00000029920 | 1,74E-01  | 4,968080576  | 5,48E+00 | 1,93E-02 | 1,47E-01 | Smarcad1      | 1,13 | No  |
| ENSMUSG00000029922 | 1,20E-02  | 6,965639657  | 3,86E-02 | 8,44E-01 | 9,86E-01 | Mkrn1         | 1,01 | No  |
| ENSMUSG00000029923 | 1,88E-01  | 3,94479003   | 4,30E+00 | 3,81E-02 | 2,32E-01 | Rab19         | 1,14 | No  |
| ENSMUSG00000029924 | 3,65E-01  | 4,936465388  | 2,37E+01 | 1,10E-06 | 4,84E-05 | Slc37a3       | 1,29 | Yes |
| ENSMUSG00000029925 | 1,86E-01  | 7,962335674  | 1,01E+01 | 1,46E-03 | 2,19E-02 | Tbxas1        | 1,14 | Yes |
| ENSMUSG00000029992 | -3,06E-01 | 6,193238628  | 2,29E+01 | 1,73E-06 | 7,17E-05 | Gfpt1         | 0,81 | Yes |
| ENSMUSG00000029993 | 1,12E-01  | 3,613784112  | 1,34E+00 | 2,47E-01 | 5,50E-01 | Nfu1          | 1,08 | No  |
| ENSMUSG00000029994 | 3,68E-02  | 8,895433856  | 4,18E-01 | 5,18E-01 | 7,98E-01 | Anxa4         | 1,03 | No  |
| ENSMUSG00000029998 | 5,44E-02  | 6,589168166  | 7,60E-01 | 3,83E-01 | 6,85E-01 | Pcyox1        | 1,04 | No  |
| ENSMUSG00000029999 | 1,25E+00  | -1,344350825 | 4,48E+00 | 3,43E-02 | 2,18E-01 | Tgfa          | 2,38 | No  |
| ENSMUSG00000030000 | -3,65E-01 | -0,954732226 | 7,05E-01 | 4,01E-01 | 6,99E-01 | Add2          | 0,78 | No  |
| ENSMUSG00000030002 | -1,32E-02 | 7,242037661  | 4,88E-02 | 8,25E-01 | 9,74E-01 | Dusp11        | 0,99 | No  |
| ENSMUSG00000030007 | -2,32E-02 | 7,022508572  | 1,46E-01 | 7,02E-01 | 9,05E-01 | Cct7          | 0,98 | No  |
| ENSMUSG00000030008 | -3,37E-02 | 3,171043113  | 9,65E-02 | 7,56E-01 | 9,35E-01 | Pradc1        | 0,98 | No  |
| ENSMUSG00000030016 | 9,22E-02  | 6,226187085  | 2,09E+00 | 1,48E-01 | 4,88E-01 | Zfp638        | 1,07 | No  |
| ENSMUSG00000030019 | 1,79E-01  | 5,411333021  | 6,50E+00 | 1,08E-02 | 9,89E-02 | Fbxl14        | 1,13 | No  |
| ENSMUSG00000030020 | 4,50E-01  | 2,207389133  | 9,70E+00 | 1,84E-03 | 2,62E-02 | Prickle2      | 1,37 | Yes |
| ENSMUSG00000030022 | -1,75E+00 | -0,954484861 | 1,75E+01 | 2,93E-05 | 8,58E-04 | Adamts9       | 0,30 | Yes |
| ENSMUSG00000030029 | -1,05E+00 | 1,168323636  | 2,78E+01 | 1,33E-07 | 7,17E-06 | Lrig1         | 0,48 | Yes |
| ENSMUSG00000030030 | 5,95E-01  | 0,103692279  | 4,08E+00 | 4,34E-02 | 2,48E-01 | 1700003E16Rik | 1,51 | No  |
| ENSMUSG00000030031 | 2,12E-01  | 1,001843237  | 1,10E+00 | 2,93E-01 | 5,89E-01 | Kbtbd8        | 1,16 | No  |
| ENSMUSG00000030032 | 4,10E-01  | 1,567622172  | 5,56E+00 | 1,84E-02 | 1,43E-01 | Wdr54         | 1,33 | No  |
| ENSMUSG00000030034 | 8,69E-03  | 3,927145581  | 9,16E-03 | 9,24E-01 | 1,00E+00 | Ino80b        | 1,01 | No  |
| ENSMUSG00000030035 | -9,42E-02 | 5,109503932  | 1,68E+00 | 1,95E-01 | 5,50E-01 | Wbp1          | 0,94 | No  |
| ENSMUSG00000030036 | 5,95E-02  | 6,09361016   | 8,41E-01 | 3,59E-01 | 6,61E-01 | Mogs          | 1,04 | No  |

|                    |           |              |          |          |          |          |      |     |
|--------------------|-----------|--------------|----------|----------|----------|----------|------|-----|
| ENSMUSG00000030037 | -5,51E-02 | 2,765528451  | 2,09E-01 | 6,47E-01 | 8,75E-01 | Mrpl53   | 0,96 | No  |
| ENSMUSG00000030041 | -2,81E-01 | 2,12876457   | 3,92E+00 | 4,77E-02 | 2,62E-01 | M1ap     | 0,82 | No  |
| ENSMUSG00000030042 | 9,80E-02  | 4,525723453  | 1,51E+00 | 2,20E-01 | 5,50E-01 | Pole4    | 1,07 | No  |
| ENSMUSG00000030045 | 5,62E-02  | 4,689984042  | 5,25E-01 | 4,69E-01 | 7,57E-01 | Mrpl19   | 1,04 | No  |
| ENSMUSG00000030046 | 4,70E-01  | -2,226236577 | 2,99E-01 | 5,84E-01 | 8,38E-01 | Bmp10    | 1,38 | No  |
| ENSMUSG00000030047 | 2,20E-01  | 6,905815013  | 1,29E+01 | 3,21E-04 | 6,39E-03 | Arhgap25 | 1,16 | Yes |
| ENSMUSG00000030051 | 9,77E-02  | 2,921289814  | 7,23E-01 | 3,95E-01 | 6,96E-01 | Aplf     | 1,07 | No  |
| ENSMUSG00000030054 | -8,88E-02 | -1,831994252 | 2,21E-02 | 8,82E-01 | 1,00E+00 | Gp9      | 0,94 | No  |
| ENSMUSG00000030055 | 5,15E-02  | 6,870049645  | 7,10E-01 | 3,99E-01 | 6,98E-01 | Rab43    | 1,04 | No  |
| ENSMUSG00000030056 | -1,59E-01 | 4,794357999  | 4,30E+00 | 3,82E-02 | 2,32E-01 | Isy1     | 0,90 | No  |
| ENSMUSG00000030057 | -1,01E-01 | 7,992400373  | 3,03E+00 | 8,19E-02 | 3,68E-01 | Cnbp     | 0,93 | No  |
| ENSMUSG00000030058 | -9,93E-03 | 6,875534556  | 2,64E-02 | 8,71E-01 | 1,00E+00 | Copg1    | 0,99 | No  |
| ENSMUSG00000030059 | 1,11E-01  | 5,691069541  | 2,67E+00 | 1,03E-01 | 3,95E-01 | Tmf1     | 1,08 | No  |
| ENSMUSG00000030060 | -1,24E-01 | 3,678507048  | 1,70E+00 | 1,92E-01 | 5,50E-01 | Hmces    | 0,92 | No  |
| ENSMUSG00000030061 | -1,95E-02 | 4,971636151  | 6,86E-02 | 7,93E-01 | 9,56E-01 | Uba3     | 0,99 | No  |
| ENSMUSG00000030062 | 8,52E-02  | 8,489409685  | 2,20E+00 | 1,38E-01 | 4,70E-01 | Rpn1     | 1,06 | No  |
| ENSMUSG00000030064 | 3,37E-01  | 4,781809264  | 1,88E+01 | 1,45E-05 | 4,66E-04 | Frmd4b   | 1,26 | Yes |
| ENSMUSG00000030067 | -1,39E-01 | 5,466336192  | 4,00E+00 | 4,54E-02 | 2,54E-01 | Foxp1    | 0,91 | No  |
| ENSMUSG00000030068 | 2,08E-01  | 1,759601216  | 1,64E+00 | 2,00E-01 | 5,50E-01 | Gm20696  | 1,16 | No  |
| ENSMUSG00000030069 | 1,37E+00  | -2,54821431  | 1,92E+00 | 1,66E-01 | 5,18E-01 | Prok2    | 2,59 | No  |
| ENSMUSG00000030074 | -3,15E-02 | -2,770572643 | 5,40E-04 | 9,81E-01 | 1,00E+00 | Gxylt2   | 0,98 | No  |
| ENSMUSG00000030077 | -2,54E+00 | -1,600536198 | 1,67E+01 | 4,45E-05 | 1,23E-03 | Chl1     | 0,17 | Yes |
| ENSMUSG00000030079 | -2,17E-01 | 2,894321446  | 3,48E+00 | 6,22E-02 | 3,10E-01 | Ruvbl1   | 0,86 | No  |
| ENSMUSG00000030082 | 5,30E-02  | 7,824689189  | 8,21E-01 | 3,65E-01 | 6,66E-01 | Sec61a1  | 1,04 | No  |
| ENSMUSG00000030083 | 8,90E-02  | 5,261663693  | 1,56E+00 | 2,11E-01 | 5,50E-01 | Abtb1    | 1,06 | No  |
| ENSMUSG00000030084 | 2,09E-01  | 9,370211438  | 1,36E+01 | 2,29E-04 | 4,85E-03 | Plxna1   | 1,16 | Yes |
| ENSMUSG00000030086 | 7,42E-02  | 2,762563318  | 3,86E-01 | 5,34E-01 | 8,07E-01 | Chchd6   | 1,05 | No  |
| ENSMUSG00000030087 | -1,34E+00 | -2,711670455 | 1,12E+00 | 2,89E-01 | 5,85E-01 | Klf15    | 0,40 | No  |
| ENSMUSG00000030088 | 1,47E-01  | 4,262209366  | 3,02E+00 | 8,24E-02 | 3,69E-01 | Aldh1l1  | 1,11 | No  |
| ENSMUSG00000030089 | 2,38E-01  | 4,187621642  | 7,64E+00 | 5,71E-03 | 6,17E-02 | Slc41a3  | 1,18 | No  |
| ENSMUSG00000030091 | -2,26E-01 | 6,61163838   | 1,33E+01 | 2,63E-04 | 5,45E-03 | Nup210   | 0,85 | Yes |
| ENSMUSG00000030094 | 8,99E-02  | 3,943983379  | 1,02E+00 | 3,12E-01 | 6,12E-01 | Xpc      | 1,06 | No  |

|                    |           |              |           |          |          |          |      |     |
|--------------------|-----------|--------------|-----------|----------|----------|----------|------|-----|
| ENSMUSG00000030095 | 1,91E-01  | 6,52920746   | 9,25E+00  | 2,35E-03 | 3,19E-02 | Tmem43   | 1,14 | Yes |
| ENSMUSG00000030096 | -5,42E-02 | 9,689293339  | 9,24E-01  | 3,36E-01 | 6,37E-01 | Slc6a6   | 0,96 | No  |
| ENSMUSG00000030098 | 4,91E-01  | -0,19602889  | 2,49E+00  | 1,15E-01 | 4,19E-01 | Grip2    | 1,41 | No  |
| ENSMUSG00000030101 | 1,17E-02  | 6,356374351  | 3,42E-02  | 8,53E-01 | 9,91E-01 | Sumf1    | 1,01 | No  |
| ENSMUSG00000030102 | 5,80E-02  | 5,76992283   | 7,44E-01  | 3,88E-01 | 6,89E-01 | Itpr1    | 1,04 | No  |
| ENSMUSG00000030103 | -2,78E-01 | 10,03060816  | 2,44E+01  | 7,84E-07 | 3,59E-05 | Bhlhe40  | 0,82 | Yes |
| ENSMUSG00000030104 | -1,72E-02 | 8,633920912  | 9,08E-02  | 7,63E-01 | 9,39E-01 | Edem1    | 0,99 | No  |
| ENSMUSG00000030105 | 1,03E-01  | 8,168831642  | 3,18E+00  | 7,48E-02 | 3,48E-01 | Arl8b    | 1,07 | No  |
| ENSMUSG00000030107 | -4,77E-01 | 4,171504188  | 3,22E+01  | 1,42E-08 | 9,45E-07 | Usp18    | 0,72 | Yes |
| ENSMUSG00000030108 | -3,09E-01 | 2,568404218  | 5,91E+00  | 1,50E-02 | 1,26E-01 | Slc6a13  | 0,81 | No  |
| ENSMUSG00000030109 | -8,42E-02 | 5,206417785  | 1,39E+00  | 2,38E-01 | 5,50E-01 | Slc6a12  | 0,94 | No  |
| ENSMUSG00000030110 | -1,60E-01 | -1,145985651 | 1,11E-01  | 7,39E-01 | 9,26E-01 | Ret      | 0,89 | No  |
| ENSMUSG00000030117 | 8,12E-01  | -2,311239038 | 7,92E-01  | 3,73E-01 | 6,74E-01 | Gdf3     | 1,76 | No  |
| ENSMUSG00000030120 | 4,97E-02  | 6,941673943  | 6,64E-01  | 4,15E-01 | 7,10E-01 | Mlf2     | 1,04 | No  |
| ENSMUSG00000030122 | 9,08E-02  | 7,909516028  | 2,42E+00  | 1,20E-01 | 4,31E-01 | Ptms     | 1,06 | No  |
| ENSMUSG00000030123 | -3,55E-02 | 9,746311122  | 3,97E-01  | 5,29E-01 | 8,04E-01 | Plxnd1   | 0,98 | No  |
| ENSMUSG00000030124 | 2,80E-01  | 1,490026882  | 2,47E+00  | 1,16E-01 | 4,21E-01 | Lag3     | 1,21 | No  |
| ENSMUSG00000030125 | 6,95E-01  | -2,963260828 | 2,60E-01  | 6,10E-01 | 8,51E-01 | Lrrc23   | 1,62 | No  |
| ENSMUSG00000030126 | -5,70E-02 | 8,330285507  | 9,78E-01  | 3,23E-01 | 6,23E-01 | Tmcc1    | 0,96 | No  |
| ENSMUSG00000030127 | 4,82E-02  | 5,083270065  | 4,39E-01  | 5,08E-01 | 7,92E-01 | Cops7a   | 1,03 | No  |
| ENSMUSG00000030134 | -1,05E-01 | 2,503617849  | 6,70E-01  | 4,13E-01 | 7,09E-01 | Rasgef1a | 0,93 | No  |
| ENSMUSG00000030137 | -7,40E-01 | 1,712186837  | 2,10E+01  | 4,62E-06 | 1,68E-04 | Tuba8    | 0,60 | Yes |
| ENSMUSG00000030138 | 1,50E-01  | 6,507338003  | 5,69E+00  | 1,70E-02 | 1,36E-01 | Bms1     | 1,11 | No  |
| ENSMUSG00000030142 | -2,44E-01 | 5,397943771  | 1,20E+01  | 5,22E-04 | 9,51E-03 | Clec4e   | 0,84 | Yes |
| ENSMUSG00000030144 | -6,62E-02 | 5,919771248  | 9,89E-01  | 3,20E-01 | 6,21E-01 | Clec4d   | 0,96 | No  |
| ENSMUSG00000030145 | -6,27E-03 | 0,632696932  | 7,69E-04  | 9,78E-01 | 1,00E+00 | Zfp248   | 1,00 | No  |
| ENSMUSG00000030147 | 2,64E-01  | 3,724511951  | 7,65E+00  | 5,69E-03 | 6,15E-02 | Clec4b1  | 1,20 | No  |
| ENSMUSG00000030148 | 3,41E-01  | 7,08789032   | 3,14E+01  | 2,07E-08 | 1,34E-06 | Clec4a2  | 1,27 | Yes |
| ENSMUSG00000030149 | -4,15E-01 | 4,159023449  | 2,34E+01  | 1,34E-06 | 5,76E-05 | Klrk1    | 0,75 | Yes |
| ENSMUSG00000030154 | 3,88E-01  | 2,989537627  | 1,17E+01  | 6,25E-04 | 1,10E-02 | Klrb1f   | 1,31 | Yes |
| ENSMUSG00000030155 | 9,01E-03  | -3,107646452 | -5,16E-10 | 1,00E+00 | 1,00E+00 | Clec2e   | 1,01 | No  |
| ENSMUSG00000030156 | -2,88E-01 | 4,966832642  | 1,56E+01  | 7,85E-05 | 1,98E-03 | Cd69     | 0,82 | Yes |



|                    |           |              |           |          |          |           |      |     |
|--------------------|-----------|--------------|-----------|----------|----------|-----------|------|-----|
| ENSMUSG00000030157 | -2,40E-01 | 4,535027957  | 9,30E+00  | 2,30E-03 | 3,13E-02 | Clec2d    | 0,85 | Yes |
| ENSMUSG00000030158 | 7,16E-01  | -2,401418105 | 7,45E-01  | 3,88E-01 | 6,88E-01 | Clec12b   | 1,64 | No  |
| ENSMUSG00000030159 | -1,22E-01 | 3,572394368  | 1,59E+00  | 2,07E-01 | 5,50E-01 | Clec1b    | 0,92 | No  |
| ENSMUSG00000030160 | -6,26E-01 | -0,912464211 | 2,21E+00  | 1,37E-01 | 4,68E-01 | Tmem52b   | 0,65 | No  |
| ENSMUSG00000030161 | 5,65E-03  | 6,792937397  | 8,45E-03  | 9,27E-01 | 1,00E+00 | Gabarapl1 | 1,00 | No  |
| ENSMUSG00000030162 | 4,50E-02  | 5,310542358  | 4,05E-01  | 5,25E-01 | 8,02E-01 | Olr1      | 1,03 | No  |
| ENSMUSG00000030165 | -1,96E-01 | 0,309736524  | 5,58E-01  | 4,55E-01 | 7,45E-01 | Klrd1     | 0,87 | No  |
| ENSMUSG00000030166 | -3,81E-02 | 2,497651272  | 9,11E-02  | 7,63E-01 | 9,38E-01 | Rad52     | 0,97 | No  |
| ENSMUSG00000030167 | -1,87E+00 | -3,107637761 | 1,39E+00  | 2,38E-01 | 5,50E-01 | Klrc1     | 0,27 | No  |
| ENSMUSG00000030168 | 6,02E-04  | 8,097746815  | 1,08E-04  | 9,92E-01 | 1,00E+00 | Adipor2   | 1,00 | No  |
| ENSMUSG00000030170 | 6,95E-01  | -2,963260828 | 2,60E-01  | 6,10E-01 | 8,51E-01 | Wnt5b     | 1,62 | No  |
| ENSMUSG00000030172 | 8,80E-02  | 4,536662604  | 1,23E+00  | 2,68E-01 | 5,65E-01 | Erc1      | 1,06 | No  |
| ENSMUSG00000030177 | 8,67E-02  | 3,296377495  | 6,88E-01  | 4,07E-01 | 7,03E-01 | Ccdc77    | 1,06 | No  |
| ENSMUSG00000030178 | -5,88E-02 | -3,033652696 | 1,62E-03  | 9,68E-01 | 1,00E+00 | Klra13-ps | 0,96 | No  |
| ENSMUSG00000030180 | -2,00E-02 | 6,612419494  | 1,03E-01  | 7,48E-01 | 9,30E-01 | Kdm5a     | 0,99 | No  |
| ENSMUSG00000030187 | 2,83E-01  | 3,217598917  | 6,75E+00  | 9,38E-03 | 8,90E-02 | Klra2     | 1,22 | No  |
| ENSMUSG00000030188 | 2,43E-02  | 2,129507795  | 2,76E-02  | 8,68E-01 | 1,00E+00 | Magohb    | 1,02 | No  |
| ENSMUSG00000030189 | 1,24E-01  | 6,942087223  | 4,12E+00  | 4,24E-02 | 2,45E-01 | Ybx3      | 1,09 | No  |
| ENSMUSG00000030199 | -1,33E-01 | 7,424358422  | 5,03E+00  | 2,50E-02 | 1,75E-01 | Etv6      | 0,91 | No  |
| ENSMUSG00000030200 | -4,64E-01 | 1,750091386  | 9,09E+00  | 2,58E-03 | 3,41E-02 | Bcl2l14   | 0,72 | Yes |
| ENSMUSG00000030201 | 1,00E-01  | 7,508077943  | 2,84E+00  | 9,17E-02 | 3,82E-01 | Lrp6      | 1,07 | No  |
| ENSMUSG00000030203 | -2,15E-01 | 5,790924896  | 1,04E+01  | 1,27E-03 | 1,96E-02 | Dusp16    | 0,86 | Yes |
| ENSMUSG00000030204 | -2,15E-02 | 5,722151208  | 1,02E-01  | 7,50E-01 | 9,31E-01 | Ddx47     | 0,99 | No  |
| ENSMUSG00000030205 | -1,04E+00 | -1,800950427 | 2,39E+00  | 1,22E-01 | 4,37E-01 | Gprc5d    | 0,49 | No  |
| ENSMUSG00000030206 | 6,06E-01  | -0,75576117  | 2,41E+00  | 1,20E-01 | 4,32E-01 | Gsg1      | 1,52 | No  |
| ENSMUSG00000030207 | 2,69E-01  | 4,765830579  | 1,21E+01  | 5,04E-04 | 9,23E-03 | Fam234b   | 1,21 | Yes |
| ENSMUSG00000030208 | -7,63E-02 | 6,032805194  | 1,34E+00  | 2,48E-01 | 5,50E-01 | Emp1      | 0,95 | No  |
| ENSMUSG00000030209 | 9,01E-03  | -3,107646452 | -5,16E-10 | 1,00E+00 | 1,00E+00 | Grin2b    | 1,01 | No  |
| ENSMUSG00000030213 | 1,78E-02  | 6,10014512   | 7,64E-02  | 7,82E-01 | 9,50E-01 | Atf7ip    | 1,01 | No  |
| ENSMUSG00000030214 | 1,87E-01  | 7,964989132  | 1,02E+01  | 1,38E-03 | 2,08E-02 | Plbd1     | 1,14 | Yes |
| ENSMUSG00000030216 | 3,39E-02  | 6,873535467  | 3,06E-01  | 5,80E-01 | 8,37E-01 | Wbp11     | 1,02 | No  |
| ENSMUSG00000030217 | -7,98E-01 | -2,311050566 | 9,26E-01  | 3,36E-01 | 6,37E-01 | Art4      | 0,58 | No  |

|                    |           |              |          |          |          |         |      |     |
|--------------------|-----------|--------------|----------|----------|----------|---------|------|-----|
| ENSMUSG00000030218 | -4,86E-01 | -1,86367251  | 5,70E-01 | 4,50E-01 | 7,40E-01 | Mgp     | 0,71 | No  |
| ENSMUSG00000030219 | 4,13E-01  | -0,816537389 | 1,08E+00 | 2,99E-01 | 5,95E-01 | Erp27   | 1,33 | No  |
| ENSMUSG00000030220 | 4,91E-02  | 8,064904195  | 7,15E-01 | 3,98E-01 | 6,98E-01 | Arhgdib | 1,03 | No  |
| ENSMUSG00000030222 | -5,67E-01 | 0,477190834  | 5,70E+00 | 1,69E-02 | 1,36E-01 | Rerg    | 0,67 | No  |
| ENSMUSG00000030223 | 1,90E-01  | 5,295072031  | 7,12E+00 | 7,63E-03 | 7,64E-02 | Ptpro   | 1,14 | No  |
| ENSMUSG00000030224 | 6,93E-03  | 6,682785639  | 1,25E-02 | 9,11E-01 | 1,00E+00 | Strap   | 1,00 | No  |
| ENSMUSG00000030225 | 1,08E-01  | 4,748833062  | 1,99E+00 | 1,58E-01 | 5,05E-01 | Dera    | 1,08 | No  |
| ENSMUSG00000030226 | 1,87E+00  | -3,107639691 | 1,38E+00 | 2,40E-01 | 5,50E-01 | Lmo3    | 3,67 | No  |
| ENSMUSG00000030231 | 1,50E-01  | 4,490287232  | 3,49E+00 | 6,17E-02 | 3,09E-01 | Plekha5 | 1,11 | No  |
| ENSMUSG00000030232 | -2,34E-01 | 7,087847595  | 1,50E+01 | 1,05E-04 | 2,53E-03 | Aebp2   | 0,85 | Yes |
| ENSMUSG00000030243 | 1,75E-01  | 4,989326315  | 5,57E+00 | 1,83E-02 | 1,42E-01 | Recql   | 1,13 | No  |
| ENSMUSG00000030244 | 2,57E+00  | -3,0336723   | 2,56E+00 | 1,10E-01 | 4,06E-01 | Gys2    | 5,96 | No  |
| ENSMUSG00000030245 | 1,93E-01  | 5,87007451   | 8,44E+00 | 3,68E-03 | 4,45E-02 | Golt1b  | 1,14 | Yes |
| ENSMUSG00000030246 | 1,48E-01  | 3,238772111  | 1,90E+00 | 1,68E-01 | 5,22E-01 | Ldhb    | 1,11 | No  |
| ENSMUSG00000030249 | -1,94E+00 | -3,107619243 | 1,50E+00 | 2,21E-01 | 5,50E-01 | Abcc9   | 0,26 | No  |
| ENSMUSG00000030254 | 5,37E-02  | 4,075515601  | 3,78E-01 | 5,39E-01 | 8,09E-01 | Rad18   | 1,04 | No  |
| ENSMUSG00000030255 | 1,04E+00  | -1,247149395 | 4,34E+00 | 3,73E-02 | 2,30E-01 | Sspn    | 2,05 | No  |
| ENSMUSG00000030256 | -4,99E-02 | 5,705327823  | 5,46E-01 | 4,60E-01 | 7,49E-01 | Bhlhe41 | 0,97 | No  |
| ENSMUSG00000030257 | 2,26E-01  | 4,282206855  | 7,21E+00 | 7,27E-03 | 7,38E-02 | Srgap3  | 1,17 | No  |
| ENSMUSG00000030259 | -1,11E-01 | 6,11939735   | 2,96E+00 | 8,53E-02 | 3,75E-01 | Rassf8  | 0,93 | No  |
| ENSMUSG00000030263 | 1,62E-01  | 6,735898576  | 6,84E+00 | 8,92E-03 | 8,58E-02 | Lrmp    | 1,12 | No  |
| ENSMUSG00000030264 | 3,14E-02  | 4,947932019  | 1,79E-01 | 6,73E-01 | 8,90E-01 | Thumpd3 | 1,02 | No  |
| ENSMUSG00000030265 | -1,75E-03 | 5,57878843   | 6,52E-04 | 9,80E-01 | 1,00E+00 | Kras    | 1,00 | No  |
| ENSMUSG00000030268 | -1,44E-01 | -0,963368271 | 1,09E-01 | 7,42E-01 | 9,27E-01 | Bcat1   | 0,91 | No  |
| ENSMUSG00000030269 | -1,86E-01 | 6,102586667  | 8,31E+00 | 3,95E-03 | 4,69E-02 | Mttr14  | 0,88 | Yes |
| ENSMUSG00000030270 | -8,39E-02 | -1,522627979 | 2,47E-02 | 8,75E-01 | 1,00E+00 | Cpne9   | 0,94 | No  |
| ENSMUSG00000030271 | 2,32E-01  | 3,269072198  | 4,84E+00 | 2,79E-02 | 1,89E-01 | Ogg1    | 1,17 | No  |
| ENSMUSG00000030272 | 2,48E-01  | 5,46118025   | 1,26E+01 | 3,82E-04 | 7,37E-03 | Camk1   | 1,19 | Yes |
| ENSMUSG00000030275 | -1,43E-01 | 6,77634318   | 5,46E+00 | 1,94E-02 | 1,48E-01 | Etnk1   | 0,91 | No  |
| ENSMUSG00000030276 | 1,76E-02  | 6,30249231   | 7,64E-02 | 7,82E-01 | 9,50E-01 | Ttll3   | 1,01 | No  |
| ENSMUSG00000030278 | 4,31E-01  | -2,770577482 | 1,44E-01 | 7,04E-01 | 9,06E-01 | Cidec   | 1,35 | No  |
| ENSMUSG00000030279 | 1,08E-01  | 5,379969373  | 2,36E+00 | 1,25E-01 | 4,42E-01 | C2cd5   | 1,08 | No  |

|                    |           |              |          |          |          |         |      |     |
|--------------------|-----------|--------------|----------|----------|----------|---------|------|-----|
| ENSMUSG00000030281 | 1,40E-01  | -0,548166437 | 1,60E-01 | 6,89E-01 | 8,99E-01 | Il17rc  | 1,10 | No  |
| ENSMUSG00000030282 | 2,04E-01  | 5,668101812  | 8,97E+00 | 2,75E-03 | 3,58E-02 | Cmas    | 1,15 | Yes |
| ENSMUSG00000030283 | 4,13E-01  | 2,506013958  | 1,00E+01 | 1,57E-03 | 2,31E-02 | St8sia1 | 1,33 | Yes |
| ENSMUSG00000030284 | 1,22E-01  | 4,684450072  | 2,41E+00 | 1,20E-01 | 4,32E-01 | Creld1  | 1,09 | No  |
| ENSMUSG00000030286 | 8,87E-02  | 6,224433605  | 1,91E+00 | 1,67E-01 | 5,20E-01 | Emc3    | 1,06 | No  |
| ENSMUSG00000030287 | 2,71E-02  | 5,762048572  | 1,63E-01 | 6,86E-01 | 8,97E-01 | Itpr2   | 1,02 | No  |
| ENSMUSG00000030291 | -9,44E-02 | 4,754405141  | 1,51E+00 | 2,20E-01 | 5,50E-01 | Med21   | 0,94 | No  |
| ENSMUSG00000030298 | -4,51E-02 | 6,081343013  | 4,82E-01 | 4,88E-01 | 7,75E-01 | Sec13   | 0,97 | No  |
| ENSMUSG00000030301 | -3,86E-02 | 3,661785226  | 1,63E-01 | 6,87E-01 | 8,97E-01 | Ccdc91  | 0,97 | No  |
| ENSMUSG00000030302 | -7,49E-01 | -0,980449502 | 3,31E+00 | 6,88E-02 | 3,30E-01 | Atp2b2  | 0,60 | No  |
| ENSMUSG00000030303 | -1,22E-01 | 3,982454548  | 1,86E+00 | 1,73E-01 | 5,29E-01 | Far2    | 0,92 | No  |
| ENSMUSG00000030304 | -6,98E-02 | 5,455541535  | 1,00E+00 | 3,16E-01 | 6,17E-01 | Ergic2  | 0,95 | No  |
| ENSMUSG00000030306 | -5,11E-01 | -2,107603209 | 4,19E-01 | 5,18E-01 | 7,98E-01 | Tmtc1   | 0,70 | No  |
| ENSMUSG00000030307 | -3,72E-01 | -2,355616718 | 1,74E-01 | 6,76E-01 | 8,91E-01 | Slc6a11 | 0,77 | No  |
| ENSMUSG00000030309 | -2,55E-01 | 3,323394529  | 6,30E+00 | 1,21E-02 | 1,07E-01 | Caprin2 | 0,84 | No  |
| ENSMUSG00000030310 | -1,01E+00 | -2,107519672 | 1,91E+00 | 1,67E-01 | 5,20E-01 | Slc6a1  | 0,50 | No  |
| ENSMUSG00000030313 | -5,79E-01 | 0,779340857  | 6,06E+00 | 1,38E-02 | 1,19E-01 | Dennd5b | 0,67 | No  |
| ENSMUSG00000030314 | 7,92E-02  | 6,717373337  | 1,64E+00 | 2,00E-01 | 5,50E-01 | Atg7    | 1,06 | No  |
| ENSMUSG00000030315 | 1,55E-01  | 5,078895854  | 4,56E+00 | 3,27E-02 | 2,11E-01 | Vgll4   | 1,11 | No  |
| ENSMUSG00000030316 | 1,08E-01  | 2,456561266  | 6,99E-01 | 4,03E-01 | 7,01E-01 | Tamm41  | 1,08 | No  |
| ENSMUSG00000030317 | -3,88E-03 | -3,03362684  | 4,02E-12 | 1,00E+00 | 1,00E+00 | Timp4   | 1,00 | No  |
| ENSMUSG00000030319 | -2,66E-01 | 4,324854757  | 1,03E+01 | 1,36E-03 | 2,07E-02 | Cand2   | 0,83 | Yes |
| ENSMUSG00000030321 | -1,11E-01 | -0,289517274 | 1,14E-01 | 7,36E-01 | 9,24E-01 | Efcab12 | 0,93 | No  |
| ENSMUSG00000030322 | 3,00E-01  | 3,810085045  | 1,07E+01 | 1,06E-03 | 1,69E-02 | Mbd4    | 1,23 | Yes |
| ENSMUSG00000030323 | 2,35E-01  | 3,856014775  | 6,42E+00 | 1,13E-02 | 1,02E-01 | Ift122  | 1,18 | No  |
| ENSMUSG00000030324 | 1,36E-02  | -1,785658201 | 4,16E-04 | 9,84E-01 | 1,00E+00 | Rho     | 1,01 | No  |
| ENSMUSG00000030325 | 4,76E-01  | -0,648238095 | 1,55E+00 | 2,13E-01 | 5,50E-01 | Klrb1c  | 1,39 | No  |
| ENSMUSG00000030327 | -2,35E-02 | 5,801691171  | 1,22E-01 | 7,27E-01 | 9,19E-01 | Necap1  | 0,98 | No  |
| ENSMUSG00000030329 | 6,06E-01  | 3,379688462  | 3,40E+01 | 5,64E-09 | 4,11E-07 | Pianp   | 1,52 | Yes |
| ENSMUSG00000030330 | -4,12E-02 | 4,530525149  | 2,71E-01 | 6,02E-01 | 8,48E-01 | Ing4    | 0,97 | No  |
| ENSMUSG00000030335 | 1,20E-02  | 5,198840175  | 2,76E-02 | 8,68E-01 | 1,00E+00 | Mrpl51  | 1,01 | No  |
| ENSMUSG00000030336 | 1,09E-01  | 0,062040686  | 1,47E-01 | 7,01E-01 | 9,05E-01 | Cd27    | 1,08 | No  |

|                    |           |              |           |          |          |           |      |     |
|--------------------|-----------|--------------|-----------|----------|----------|-----------|------|-----|
| ENSMUSG00000030337 | 1,31E-02  | 3,974615584  | 2,15E-02  | 8,83E-01 | 1,00E+00 | Vamp1     | 1,01 | No  |
| ENSMUSG00000030339 | 1,61E-01  | 6,091040347  | 6,11E+00  | 1,34E-02 | 1,16E-01 | Ltbr      | 1,12 | No  |
| ENSMUSG00000030340 | 4,96E-01  | 0,444977328  | 3,28E+00  | 7,01E-02 | 3,34E-01 | Scnn1a    | 1,41 | No  |
| ENSMUSG00000030341 | 1,47E-01  | 6,995476775  | 5,84E+00  | 1,57E-02 | 1,30E-01 | Tnfrsf1a  | 1,11 | No  |
| ENSMUSG00000030342 | 6,92E-02  | 8,061706999  | 1,42E+00  | 2,34E-01 | 5,50E-01 | Cd9       | 1,05 | No  |
| ENSMUSG00000030344 | -3,81E-01 | -1,711755841 | 4,90E-01  | 4,84E-01 | 7,71E-01 | Akap3     | 0,77 | No  |
| ENSMUSG00000030345 | 1,11E+00  | -2,655150212 | 1,18E+00  | 2,78E-01 | 5,75E-01 | Dyrk4     | 2,16 | No  |
| ENSMUSG00000030346 | 1,20E-01  | 4,511340173  | 2,26E+00  | 1,33E-01 | 4,59E-01 | Rad51ap1  | 1,09 | No  |
| ENSMUSG00000030347 | 1,72E-01  | 5,406476112  | 6,09E+00  | 1,36E-02 | 1,17E-01 | D6Wsu163e | 1,13 | No  |
| ENSMUSG00000030351 | -3,88E-03 | -3,03362684  | 4,02E-12  | 1,00E+00 | 1,00E+00 | Tspan11   | 1,00 | No  |
| ENSMUSG00000030352 | 1,29E+00  | -0,785882883 | 9,81E+00  | 1,73E-03 | 2,49E-02 | Tspan9    | 2,45 | Yes |
| ENSMUSG00000030353 | 3,14E-02  | -3,107617333 | -7,69E-10 | 1,00E+00 | 1,00E+00 | Tead4     | 1,02 | No  |
| ENSMUSG00000030357 | 1,83E-01  | 5,600890396  | 7,10E+00  | 7,69E-03 | 7,68E-02 | Fkbp4     | 1,13 | No  |
| ENSMUSG00000030359 | 1,08E+00  | -0,904376896 | 6,63E+00  | 1,01E-02 | 9,38E-02 | Pzp       | 2,12 | No  |
| ENSMUSG00000030361 | -1,23E-01 | 1,233158932  | 4,05E-01  | 5,24E-01 | 8,01E-01 | Klrb1a    | 0,92 | No  |
| ENSMUSG00000030364 | -6,04E-01 | -1,711625451 | 9,62E-01  | 3,27E-01 | 6,28E-01 | Clec2h    | 0,66 | No  |
| ENSMUSG00000030365 | -2,58E-01 | 5,505861293  | 1,41E+01  | 1,73E-04 | 3,84E-03 | Clec2i    | 0,84 | Yes |
| ENSMUSG00000030374 | 5,31E-02  | 6,353880656  | 7,03E-01  | 4,02E-01 | 7,00E-01 | Strn4     | 1,04 | No  |
| ENSMUSG00000030376 | -4,99E-01 | -1,033401217 | 1,41E+00  | 2,35E-01 | 5,50E-01 | Slc8a2    | 0,71 | No  |
| ENSMUSG00000030380 | 2,98E-01  | 0,103877075  | 1,13E+00  | 2,87E-01 | 5,83E-01 | Mzf1      | 1,23 | No  |
| ENSMUSG00000030382 | 6,25E-01  | -2,44868796  | 4,36E-01  | 5,09E-01 | 7,92E-01 | Slc27a5   | 1,54 | No  |
| ENSMUSG00000030386 | -8,89E-02 | 2,277623391  | 4,34E-01  | 5,10E-01 | 7,93E-01 | Zfp606    | 0,94 | No  |
| ENSMUSG00000030393 | 5,19E-01  | -0,669209459 | 1,99E+00  | 1,58E-01 | 5,05E-01 | Zik1      | 1,43 | No  |
| ENSMUSG00000030397 | -1,28E-01 | 4,926421614  | 2,92E+00  | 8,74E-02 | 3,78E-01 | Mark4     | 0,92 | No  |
| ENSMUSG00000030399 | 3,59E-01  | -1,322169294 | 4,85E-01  | 4,86E-01 | 7,73E-01 | Ckm       | 1,28 | No  |
| ENSMUSG00000030400 | 6,87E-02  | 4,305730259  | 6,77E-01  | 4,11E-01 | 7,07E-01 | Ercc2     | 1,05 | No  |
| ENSMUSG00000030401 | -2,20E-01 | -1,333172149 | 2,04E-01  | 6,52E-01 | 8,77E-01 | Rtn2      | 0,86 | No  |
| ENSMUSG00000030402 | 4,84E-01  | -1,770476005 | 5,89E-01  | 4,43E-01 | 7,34E-01 | Ppm1n     | 1,40 | No  |
| ENSMUSG00000030403 | 2,25E-02  | 8,196967205  | 1,51E-01  | 6,98E-01 | 9,04E-01 | Vasp      | 1,02 | No  |
| ENSMUSG00000030406 | -4,94E-02 | -2,268185578 | 4,48E-03  | 9,47E-01 | 1,00E+00 | Gipr      | 0,97 | No  |
| ENSMUSG00000030407 | 2,14E-02  | 5,063787008  | 8,55E-02  | 7,70E-01 | 9,42E-01 | Qpctl     | 1,01 | No  |
| ENSMUSG00000030409 | 5,12E-01  | 3,626102988  | 2,68E+01  | 2,26E-07 | 1,17E-05 | Dmpk      | 1,43 | Yes |

|                    |           |              |          |          |          |          |       |     |
|--------------------|-----------|--------------|----------|----------|----------|----------|-------|-----|
| ENSMUSG00000030410 | 7,18E-02  | 4,070173089  | 6,61E-01 | 4,16E-01 | 7,11E-01 | Dmwd     | 1,05  | No  |
| ENSMUSG00000030411 | -1,37E+00 | -2,770535185 | 1,18E+00 | 2,77E-01 | 5,74E-01 | Nova2    | 0,39  | No  |
| ENSMUSG00000030413 | -9,48E-01 | 2,276516858  | 4,71E+01 | 6,73E-12 | 7,33E-10 | Pglyrp1  | 0,52  | Yes |
| ENSMUSG00000030417 | -1,30E-01 | 2,684942368  | 1,10E+00 | 2,95E-01 | 5,91E-01 | Pdcd5    | 0,91  | No  |
| ENSMUSG00000030421 | -1,62E-01 | 5,582445948  | 5,64E+00 | 1,76E-02 | 1,39E-01 | Uri1     | 0,89  | No  |
| ENSMUSG00000030423 | -7,51E-02 | 5,531291093  | 1,19E+00 | 2,75E-01 | 5,72E-01 | Pop4     | 0,95  | No  |
| ENSMUSG00000030424 | 1,81E-01  | 1,053766061  | 7,87E-01 | 3,75E-01 | 6,76E-01 | Zfp939   | 1,13  | No  |
| ENSMUSG00000030427 | 3,69E-01  | 4,648783798  | 2,19E+01 | 2,85E-06 | 1,11E-04 | Lilra6   | 1,29  | Yes |
| ENSMUSG00000030428 | -1,77E-01 | -2,424911764 | 4,86E-02 | 8,26E-01 | 9,74E-01 | Ttyh1    | 0,88  | No  |
| ENSMUSG00000030431 | 2,52E-01  | 2,790981413  | 4,55E+00 | 3,28E-02 | 2,12E-01 | Tmem238  | 1,19  | No  |
| ENSMUSG00000030432 | -1,45E-01 | 3,856840342  | 2,54E+00 | 1,11E-01 | 4,09E-01 | Rpl28    | 0,90  | No  |
| ENSMUSG00000030433 | 7,72E-01  | 0,603900645  | 1,03E+01 | 1,36E-03 | 2,07E-02 | Sbk2     | 1,71  | Yes |
| ENSMUSG00000030435 | -3,50E-02 | 6,692618729  | 3,21E-01 | 5,71E-01 | 8,32E-01 | U2af2    | 0,98  | No  |
| ENSMUSG00000030443 | 6,86E-02  | 0,609867279  | 8,99E-02 | 7,64E-01 | 9,39E-01 | Zfp583   | 1,05  | No  |
| ENSMUSG00000030446 | 6,11E-01  | 0,693792083  | 7,59E+00 | 5,87E-03 | 6,31E-02 | Zfp273   | 1,53  | No  |
| ENSMUSG00000030447 | -1,29E-01 | 7,793793048  | 4,84E+00 | 2,79E-02 | 1,89E-01 | Cyfip1   | 0,91  | No  |
| ENSMUSG00000030451 | 7,63E-02  | 7,523464667  | 1,66E+00 | 1,98E-01 | 5,50E-01 | Herc2    | 1,05  | No  |
| ENSMUSG00000030452 | 5,65E-02  | 5,884960336  | 7,27E-01 | 3,94E-01 | 6,94E-01 | Nipa2    | 1,04  | No  |
| ENSMUSG00000030465 | 1,81E-01  | 3,91929991   | 4,01E+00 | 4,52E-02 | 2,54E-01 | Psd3     | 1,13  | No  |
| ENSMUSG00000030468 | -2,41E-01 | 4,775077663  | 1,01E+01 | 1,51E-03 | 2,24E-02 | Siglecg  | 0,85  | Yes |
| ENSMUSG00000030469 | 1,11E-01  | 2,526573126  | 7,73E-01 | 3,79E-01 | 6,80E-01 | Zfp719   | 1,08  | No  |
| ENSMUSG00000030470 | 2,96E-01  | -2,655172721 | 8,88E-02 | 7,66E-01 | 9,40E-01 | Csrp3    | 1,23  | No  |
| ENSMUSG00000030471 | 6,32E-02  | 4,68374371   | 6,62E-01 | 4,16E-01 | 7,11E-01 | Zdhhc13  | 1,04  | No  |
| ENSMUSG00000030472 | 6,04E-01  | -2,401408796 | 4,07E-01 | 5,24E-01 | 8,01E-01 | Ceacam18 | 1,52  | No  |
| ENSMUSG00000030474 | 4,71E-02  | 2,068357099  | 1,00E-01 | 7,52E-01 | 9,32E-01 | Siglece  | 1,03  | No  |
| ENSMUSG00000030484 | 1,81E+00  | -3,10765737  | 1,28E+00 | 2,58E-01 | 5,50E-01 | Lypd5    | 3,49  | No  |
| ENSMUSG00000030486 | 3,34E-01  | -0,350076938 | 1,05E+00 | 3,05E-01 | 6,02E-01 | Zfp108   | 1,26  | No  |
| ENSMUSG00000030491 | 3,52E+00  | -2,655199196 | 5,37E+00 | 2,05E-02 | 1,54E-01 | Tdrd12   | 11,45 | No  |
| ENSMUSG00000030493 | 8,68E-02  | 3,462408996  | 7,43E-01 | 3,89E-01 | 6,89E-01 | Faap24   | 1,06  | No  |
| ENSMUSG00000030494 | 1,21E+00  | -1,800808134 | 1,70E+00 | 1,93E-01 | 5,50E-01 | Rhpn2    | 2,32  | No  |
| ENSMUSG00000030495 | -1,92E+00 | -3,0336536   | 1,46E+00 | 2,27E-01 | 5,50E-01 | Slc7a10  | 0,26  | No  |
| ENSMUSG00000030498 | -1,85E-01 | 1,702186723  | 1,28E+00 | 2,57E-01 | 5,50E-01 | Gas2     | 0,88  | No  |

|                    |           |              |           |          |          |           |      |     |
|--------------------|-----------|--------------|-----------|----------|----------|-----------|------|-----|
| ENSMUSG00000030499 | -1,89E+00 | -3,1076441   | 1,42E+00  | 2,33E-01 | 5,50E-01 | Kctd15    | 0,27 | No  |
| ENSMUSG00000030500 | 9,01E-03  | -3,107646452 | -5,16E-10 | 1,00E+00 | 1,00E+00 | Slc17a6   | 1,01 | No  |
| ENSMUSG00000030505 | 2,10E-01  | 4,107445512  | 5,83E+00  | 1,57E-02 | 1,30E-01 | Prmt3     | 1,16 | No  |
| ENSMUSG00000030509 | 1,40E-01  | 3,840839407  | 2,36E+00  | 1,25E-01 | 4,42E-01 | Asb7      | 1,10 | No  |
| ENSMUSG00000030510 | 1,57E+00  | -2,311173878 | 2,70E+00  | 1,00E-01 | 3,92E-01 | Cers3     | 2,98 | No  |
| ENSMUSG00000030512 | -1,49E-02 | 4,305492683  | 3,14E-02  | 8,59E-01 | 9,95E-01 | Snrpa1    | 0,99 | No  |
| ENSMUSG00000030513 | 1,87E+00  | -3,107639691 | 1,38E+00  | 2,40E-01 | 5,50E-01 | Pcsk6     | 3,67 | No  |
| ENSMUSG00000030515 | 1,38E-01  | 3,532818777  | 1,96E+00  | 1,61E-01 | 5,10E-01 | Tarsl2    | 1,10 | No  |
| ENSMUSG00000030516 | 3,09E-02  | 3,026776632  | 7,60E-02  | 7,83E-01 | 9,50E-01 | Tjp1      | 1,02 | No  |
| ENSMUSG00000030518 | 1,81E+00  | -3,10765737  | 1,28E+00  | 2,58E-01 | 5,50E-01 | Fam189a1  | 3,49 | No  |
| ENSMUSG00000030521 | 1,16E-02  | 4,75574494   | 2,28E-02  | 8,80E-01 | 1,00E+00 | Mphosph10 | 1,01 | No  |
| ENSMUSG00000030522 | 9,93E-02  | 4,375564052  | 1,39E+00  | 2,38E-01 | 5,50E-01 | Mtmt10    | 1,07 | No  |
| ENSMUSG00000030523 | -8,52E-01 | -2,896118986 | 3,98E-01  | 5,28E-01 | 8,04E-01 | Trpm1     | 0,55 | No  |
| ENSMUSG00000030527 | -6,22E-02 | 6,146401964  | 9,23E-01  | 3,37E-01 | 6,37E-01 | Crtc3     | 0,96 | No  |
| ENSMUSG00000030528 | 2,12E-01  | 4,795466907  | 7,58E+00  | 5,91E-03 | 6,34E-02 | Blm       | 1,16 | No  |
| ENSMUSG00000030530 | 5,39E-01  | 8,870036092  | 8,80E+01  | 6,55E-21 | 1,60E-18 | Furin     | 1,45 | Yes |
| ENSMUSG00000030532 | 2,13E-01  | 3,759921379  | 5,13E+00  | 2,35E-02 | 1,68E-01 | Hddc3     | 1,16 | No  |
| ENSMUSG00000030533 | 3,88E-02  | 5,879068662  | 3,42E-01  | 5,59E-01 | 8,22E-01 | Unc45a    | 1,03 | No  |
| ENSMUSG00000030534 | 5,92E-02  | 3,798917078  | 4,09E-01  | 5,22E-01 | 8,01E-01 | Vps33b    | 1,04 | No  |
| ENSMUSG00000030536 | 4,70E-02  | 10,41963064  | 7,01E-01  | 4,02E-01 | 7,01E-01 | Iqgap1    | 1,03 | No  |
| ENSMUSG00000030538 | 7,67E-02  | 5,361176909  | 1,19E+00  | 2,76E-01 | 5,73E-01 | Cib1      | 1,05 | No  |
| ENSMUSG00000030539 | 2,46E-01  | 5,724859566  | 1,32E+01  | 2,78E-04 | 5,70E-03 | Sema4b    | 1,19 | Yes |
| ENSMUSG00000030541 | 1,46E-01  | 5,796351291  | 4,74E+00  | 2,95E-02 | 1,96E-01 | Idh2      | 1,11 | No  |
| ENSMUSG00000030543 | -2,86E-01 | -1,863695392 | 1,42E-01  | 7,06E-01 | 9,08E-01 | Mesp2     | 0,82 | No  |
| ENSMUSG00000030545 | -4,35E-02 | 2,320269944  | 9,82E-02  | 7,54E-01 | 9,33E-01 | Pex11a    | 0,97 | No  |
| ENSMUSG00000030546 | -5,22E-01 | -2,832008958 | 2,11E-01  | 6,46E-01 | 8,74E-01 | Plin1     | 0,70 | No  |
| ENSMUSG00000030549 | -5,36E-02 | -2,770579584 | 1,94E-03  | 9,65E-01 | 1,00E+00 | Rhcg      | 0,96 | No  |
| ENSMUSG00000030551 | -1,94E+00 | -3,107619243 | 1,50E+00  | 2,21E-01 | 5,50E-01 | Nr2f2     | 0,26 | No  |
| ENSMUSG00000030553 | -2,97E-01 | -0,83194635  | 6,47E-01  | 4,21E-01 | 7,16E-01 | Pgpep1l   | 0,81 | No  |
| ENSMUSG00000030554 | -1,38E-01 | -1,641272956 | 6,09E-02  | 8,05E-01 | 9,63E-01 | Synm      | 0,91 | No  |
| ENSMUSG00000030555 | -3,57E-01 | 0,483745302  | 2,04E+00  | 1,53E-01 | 4,96E-01 | Ttc23     | 0,78 | No  |
| ENSMUSG00000030556 | -1,22E-01 | 3,20949187   | 1,32E+00  | 2,50E-01 | 5,50E-01 | Lrrc28    | 0,92 | No  |

|                    |           |              |           |          |          |               |      |     |
|--------------------|-----------|--------------|-----------|----------|----------|---------------|------|-----|
| ENSMUSG00000030557 | 6,10E-02  | 7,43110062   | 1,05E+00  | 3,06E-01 | 6,03E-01 | Mef2a         | 1,04 | No  |
| ENSMUSG00000030559 | -3,56E-02 | 1,73206599   | 4,90E-02  | 8,25E-01 | 9,74E-01 | Rab38         | 0,98 | No  |
| ENSMUSG00000030560 | 1,50E-01  | 9,909038082  | 7,12E+00  | 7,60E-03 | 7,62E-02 | Ctsc          | 1,11 | No  |
| ENSMUSG00000030577 | 2,97E-01  | 4,240482132  | 1,22E+01  | 4,87E-04 | 8,96E-03 | Cd22          | 1,23 | Yes |
| ENSMUSG00000030579 | -1,94E-02 | 8,510861976  | 1,14E-01  | 7,36E-01 | 9,24E-01 | Tyrobp        | 0,99 | No  |
| ENSMUSG00000030583 | 5,97E-02  | 7,133668365  | 9,79E-01  | 3,23E-01 | 6,23E-01 | Sipa1l3       | 1,04 | No  |
| ENSMUSG00000030584 | 3,16E-01  | -0,980737306 | 5,32E-01  | 4,66E-01 | 7,54E-01 | Dpf1          | 1,24 | No  |
| ENSMUSG00000030587 | -1,06E-01 | 2,734214201  | 7,84E-01  | 3,76E-01 | 6,77E-01 | 2200002D01Rik | 0,93 | No  |
| ENSMUSG00000030588 | -7,89E-02 | 4,978454761  | 1,13E+00  | 2,87E-01 | 5,83E-01 | Yif1b         | 0,95 | No  |
| ENSMUSG00000030589 | 3,64E-02  | 6,54765382   | 3,40E-01  | 5,60E-01 | 8,23E-01 | Rasgrp4       | 1,03 | No  |
| ENSMUSG00000030590 | -1,83E-01 | 4,942246908  | 6,09E+00  | 1,36E-02 | 1,17E-01 | Fam98c        | 0,88 | No  |
| ENSMUSG00000030591 | 4,45E-02  | 7,761300814  | 5,76E-01  | 4,48E-01 | 7,38E-01 | Psmc8         | 1,03 | No  |
| ENSMUSG00000030592 | -2,32E-01 | 3,43568792   | 5,43E+00  | 1,98E-02 | 1,50E-01 | Ryr1          | 0,85 | No  |
| ENSMUSG00000030595 | -3,30E-01 | 5,59418592   | 2,33E+01  | 1,36E-06 | 5,86E-05 | Nfkbib        | 0,80 | Yes |
| ENSMUSG00000030598 | -2,61E-02 | -0,574111215 | 5,32E-03  | 9,42E-01 | 1,00E+00 | Fbxo17        | 0,98 | No  |
| ENSMUSG00000030600 | -1,65E-01 | 1,310092047  | 7,34E-01  | 3,92E-01 | 6,92E-01 | Lrfn1         | 0,89 | No  |
| ENSMUSG00000030602 | 2,04E-01  | 4,987632098  | 7,68E+00  | 5,57E-03 | 6,05E-02 | Pak4          | 1,15 | No  |
| ENSMUSG00000030603 | 6,68E-03  | 6,216589682  | 1,08E-02  | 9,17E-01 | 1,00E+00 | Psmc4         | 1,00 | No  |
| ENSMUSG00000030604 | -8,58E-02 | 3,337142111  | 7,21E-01  | 3,96E-01 | 6,96E-01 | Zfp626        | 0,94 | No  |
| ENSMUSG00000030605 | -1,88E-01 | 10,05012513  | 1,12E+01  | 8,22E-04 | 1,38E-02 | Mfge8         | 0,88 | Yes |
| ENSMUSG00000030606 | -4,34E-01 | 2,022507944  | 8,20E+00  | 4,19E-03 | 4,89E-02 | Hapln3        | 0,74 | Yes |
| ENSMUSG00000030607 | -2,32E-01 | -1,126431633 | 2,26E-01  | 6,35E-01 | 8,66E-01 | Acan          | 0,85 | No  |
| ENSMUSG00000030609 | 1,69E-01  | 5,198588592  | 5,54E+00  | 1,86E-02 | 1,44E-01 | Aen           | 1,12 | No  |
| ENSMUSG00000030610 | 2,43E-01  | 3,206602941  | 5,31E+00  | 2,12E-02 | 1,57E-01 | Det1          | 1,18 | No  |
| ENSMUSG00000030611 | 1,61E-01  | 3,305860779  | 2,37E+00  | 1,24E-01 | 4,40E-01 | Mrps11        | 1,12 | No  |
| ENSMUSG00000030612 | 1,29E-01  | 4,061910238  | 2,15E+00  | 1,43E-01 | 4,77E-01 | Mrpl46        | 1,09 | No  |
| ENSMUSG00000030613 | 4,00E-02  | 3,003995363  | 1,25E-01  | 7,24E-01 | 9,17E-01 | Ccdc90b       | 1,03 | No  |
| ENSMUSG00000030614 | 2,00E-01  | 3,620546343  | 4,50E+00  | 3,40E-02 | 2,17E-01 | Tmem126b      | 1,15 | No  |
| ENSMUSG00000030615 | -5,10E-02 | 4,199963484  | 3,58E-01  | 5,50E-01 | 8,17E-01 | Tmem126a      | 0,97 | No  |
| ENSMUSG00000030616 | -1,94E+00 | -3,107619243 | 1,50E+00  | 2,21E-01 | 5,50E-01 | Sytl2         | 0,26 | No  |
| ENSMUSG00000030619 | 7,09E-02  | 5,289559897  | 9,97E-01  | 3,18E-01 | 6,19E-01 | Eed           | 1,05 | No  |
| ENSMUSG00000030623 | -2,49E-02 | -3,146121042 | -4,44E-11 | 1,00E+00 | 1,00E+00 | Prss23os      | 0,98 | No  |

|                    |           |              |          |          |          |               |      |     |
|--------------------|-----------|--------------|----------|----------|----------|---------------|------|-----|
| ENSMUSG00000030629 | -5,57E-01 | 7,443122766  | 8,77E+01 | 7,56E-21 | 1,83E-18 | Zfand6        | 0,68 | Yes |
| ENSMUSG00000030630 | -4,61E-01 | 1,438962004  | 7,01E+00 | 8,09E-03 | 7,97E-02 | Fah           | 0,73 | No  |
| ENSMUSG00000030636 | -4,65E-02 | -2,770633497 | 1,47E-03 | 9,69E-01 | 1,00E+00 | 1700010L04Rik | 0,97 | No  |
| ENSMUSG00000030638 | -5,50E-02 | -2,832003153 | 1,36E-03 | 9,71E-01 | 1,00E+00 | Sh3gl3        | 0,96 | No  |
| ENSMUSG00000030641 | 1,39E-01  | 4,437004321  | 2,94E+00 | 8,62E-02 | 3,78E-01 | Ddias         | 1,10 | No  |
| ENSMUSG00000030643 | -8,25E-01 | 2,189753013  | 3,61E+01 | 1,89E-09 | 1,48E-07 | Rab30         | 0,56 | Yes |
| ENSMUSG00000030647 | 1,85E-02  | 5,586028935  | 7,33E-02 | 7,87E-01 | 9,52E-01 | Ndufc2        | 1,01 | No  |
| ENSMUSG00000030649 | -4,67E-02 | 3,703193663  | 2,41E-01 | 6,23E-01 | 8,58E-01 | Anapc15       | 0,97 | No  |
| ENSMUSG00000030650 | -1,74E+00 | -2,548142149 | 3,34E+00 | 6,77E-02 | 3,28E-01 | Tmc5          | 0,30 | No  |
| ENSMUSG00000030651 | -2,78E-01 | -1,800890729 | 2,52E-01 | 6,16E-01 | 8,54E-01 | Art2b         | 0,82 | No  |
| ENSMUSG00000030652 | 7,87E-02  | 3,445041698  | 5,99E-01 | 4,39E-01 | 7,32E-01 | Coq7          | 1,06 | No  |
| ENSMUSG00000030653 | 7,14E-02  | 4,24702525   | 7,15E-01 | 3,98E-01 | 6,98E-01 | Gm45837       | 1,05 | No  |
| ENSMUSG00000030654 | 2,24E-03  | 7,709061127  | 1,45E-03 | 9,70E-01 | 1,00E+00 | Arl6ip1       | 1,00 | No  |
| ENSMUSG00000030655 | -2,30E-02 | 8,144756177  | 1,58E-01 | 6,91E-01 | 9,00E-01 | Smg1          | 0,98 | No  |
| ENSMUSG00000030657 | 3,09E-01  | 4,743727257  | 1,56E+01 | 8,02E-05 | 2,02E-03 | Xylt1         | 1,24 | Yes |
| ENSMUSG00000030659 | 3,48E-01  | 4,523760838  | 1,83E+01 | 1,87E-05 | 5,82E-04 | Nucb2         | 1,27 | Yes |
| ENSMUSG00000030660 | 9,97E-02  | 6,091635325  | 2,34E+00 | 1,26E-01 | 4,44E-01 | Pik3c2a       | 1,07 | No  |
| ENSMUSG00000030662 | 9,86E-02  | 6,586167113  | 2,49E+00 | 1,14E-01 | 4,18E-01 | Ipo5          | 1,07 | No  |
| ENSMUSG00000030663 | -4,98E-02 | 5,848752478  | 5,63E-01 | 4,53E-01 | 7,43E-01 | 1110004F10Rik | 0,97 | No  |
| ENSMUSG00000030666 | -7,59E-01 | 1,313357165  | 1,61E+01 | 5,93E-05 | 1,57E-03 | Calcb         | 0,59 | Yes |
| ENSMUSG00000030670 | 3,03E-02  | 0,351906386  | 1,28E-02 | 9,10E-01 | 1,00E+00 | Cyp2r1        | 1,02 | No  |
| ENSMUSG00000030671 | -6,35E-02 | 3,286003006  | 3,69E-01 | 5,43E-01 | 8,12E-01 | Pde3b         | 0,96 | No  |
| ENSMUSG00000030672 | -2,00E-01 | -1,424849337 | 1,16E-01 | 7,33E-01 | 9,23E-01 | Mylpf         | 0,87 | No  |
| ENSMUSG00000030674 | -2,25E-01 | -1,33323883  | 2,13E-01 | 6,45E-01 | 8,73E-01 | Qprt          | 0,86 | No  |
| ENSMUSG00000030677 | 1,89E-01  | 4,998170832  | 6,48E+00 | 1,09E-02 | 9,95E-02 | Kif22         | 1,14 | No  |
| ENSMUSG00000030678 | 9,44E-03  | 7,330858156  | 2,51E-02 | 8,74E-01 | 1,00E+00 | Maz           | 1,01 | No  |
| ENSMUSG00000030680 | -3,50E-02 | 3,824370125  | 1,44E-01 | 7,04E-01 | 9,06E-01 | Pagr1a        | 0,98 | No  |
| ENSMUSG00000030681 | -2,05E-01 | 7,782784807  | 1,22E+01 | 4,68E-04 | 8,69E-03 | Mvp           | 0,87 | Yes |
| ENSMUSG00000030682 | 1,30E-01  | 6,623039146  | 4,35E+00 | 3,70E-02 | 2,29E-01 | Cdipt         | 1,09 | No  |
| ENSMUSG00000030683 | -3,80E-01 | -0,252309101 | 1,39E+00 | 2,38E-01 | 5,50E-01 | Sez6l2        | 0,77 | No  |
| ENSMUSG00000030685 | -4,61E-02 | 3,579708885  | 2,26E-01 | 6,34E-01 | 8,66E-01 | Kctd13        | 0,97 | No  |
| ENSMUSG00000030688 | -6,52E-01 | 2,995470625  | 3,51E+01 | 3,05E-09 | 2,32E-07 | Stard10       | 0,64 | Yes |



|                    |           |              |          |          |          |          |      |     |
|--------------------|-----------|--------------|----------|----------|----------|----------|------|-----|
| ENSMUSG00000030689 | 1,64E-02  | 5,111845335  | 5,04E-02 | 8,22E-01 | 9,72E-01 | Ino80e   | 1,01 | No  |
| ENSMUSG00000030691 | -1,57E-01 | 5,400560664  | 5,08E+00 | 2,42E-02 | 1,71E-01 | Fchsd2   | 0,90 | No  |
| ENSMUSG00000030695 | 6,99E-02  | 9,479673718  | 1,53E+00 | 2,16E-01 | 5,50E-01 | Aldoa    | 1,05 | No  |
| ENSMUSG00000030697 | -4,40E-02 | 6,930394758  | 5,21E-01 | 4,71E-01 | 7,59E-01 | Ppp4c    | 0,97 | No  |
| ENSMUSG00000030699 | 5,20E-01  | -0,912881615 | 1,54E+00 | 2,14E-01 | 5,50E-01 | Tbx6     | 1,43 | No  |
| ENSMUSG00000030701 | -1,20E-01 | -0,711696427 | 8,52E-02 | 7,70E-01 | 9,42E-01 | Plekhb1  | 0,92 | No  |
| ENSMUSG00000030703 | -1,07E-01 | 1,087474521  | 2,83E-01 | 5,95E-01 | 8,43E-01 | Gdpd3    | 0,93 | No  |
| ENSMUSG00000030704 | 7,51E-02  | 6,481236951  | 1,43E+00 | 2,32E-01 | 5,50E-01 | Rab6a    | 1,05 | No  |
| ENSMUSG00000030706 | 1,30E-01  | 4,035625505  | 2,13E+00 | 1,44E-01 | 4,80E-01 | Mrpl48   | 1,09 | No  |
| ENSMUSG00000030707 | -9,44E-02 | 8,979458953  | 2,75E+00 | 9,72E-02 | 3,89E-01 | Coro1a   | 0,94 | No  |
| ENSMUSG00000030708 | 7,16E-02  | 3,405030824  | 4,94E-01 | 4,82E-01 | 7,69E-01 | Dnajb13  | 1,05 | No  |
| ENSMUSG00000030711 | 2,66E-01  | 1,607090444  | 2,33E+00 | 1,27E-01 | 4,47E-01 | Sult1a1  | 1,20 | No  |
| ENSMUSG00000030714 | 8,63E-02  | 2,568768915  | 4,56E-01 | 5,00E-01 | 7,85E-01 | Sgf29    | 1,06 | No  |
| ENSMUSG00000030717 | 7,24E-02  | 2,2211695    | 2,78E-01 | 5,98E-01 | 8,45E-01 | Nupr1    | 1,05 | No  |
| ENSMUSG00000030718 | 5,28E-02  | 5,086518423  | 5,20E-01 | 4,71E-01 | 7,59E-01 | Ppme1    | 1,04 | No  |
| ENSMUSG00000030720 | 2,26E-01  | 5,78493434   | 1,13E+01 | 7,86E-04 | 1,33E-02 | Cln3     | 1,17 | Yes |
| ENSMUSG00000030722 | 2,02E-01  | 3,96642252   | 5,19E+00 | 2,27E-02 | 1,64E-01 | Nfatc2ip | 1,15 | No  |
| ENSMUSG00000030724 | -1,43E+00 | -1,740822382 | 5,19E+00 | 2,27E-02 | 1,64E-01 | Cd19     | 0,37 | No  |
| ENSMUSG00000030725 | 3,80E-01  | 2,118033961  | 6,94E+00 | 8,45E-03 | 8,25E-02 | Lipt2    | 1,30 | No  |
| ENSMUSG00000030726 | 9,83E-02  | 5,206743824  | 1,88E+00 | 1,70E-01 | 5,26E-01 | Pold3    | 1,07 | No  |
| ENSMUSG00000030727 | -4,00E-02 | 4,76290754   | 2,73E-01 | 6,01E-01 | 8,47E-01 | Rabep2   | 0,97 | No  |
| ENSMUSG00000030729 | 4,49E-01  | 5,58872954   | 4,24E+01 | 7,37E-11 | 7,13E-09 | Pgm2l1   | 1,36 | Yes |
| ENSMUSG00000030730 | 4,67E-01  | -0,401510695 | 1,70E+00 | 1,92E-01 | 5,50E-01 | Atp2a1   | 1,38 | No  |
| ENSMUSG00000030731 | -8,57E-01 | -2,963247565 | 4,04E-01 | 5,25E-01 | 8,02E-01 | Syt3     | 0,55 | No  |
| ENSMUSG00000030732 | -1,89E+00 | -3,1076441   | 1,42E+00 | 2,33E-01 | 5,50E-01 | Chrdl2   | 0,27 | No  |
| ENSMUSG00000030733 | 2,23E-02  | 5,576244732  | 1,07E-01 | 7,44E-01 | 9,28E-01 | Sh2b1    | 1,02 | No  |
| ENSMUSG00000030735 | 3,40E-02  | 6,110306954  | 2,77E-01 | 5,99E-01 | 8,46E-01 | Gm9755   | 1,02 | No  |
| ENSMUSG00000030737 | -1,38E-01 | 1,074811706  | 4,85E-01 | 4,86E-01 | 7,73E-01 | Slco2b1  | 0,91 | No  |
| ENSMUSG00000030738 | -1,40E-02 | 7,612035144  | 5,61E-02 | 8,13E-01 | 9,67E-01 | Eif3c    | 0,99 | No  |
| ENSMUSG00000030739 | -6,08E-01 | -2,401394958 | 5,04E-01 | 4,78E-01 | 7,65E-01 | Myh14    | 0,66 | No  |
| ENSMUSG00000030741 | 1,61E-01  | 6,206613589  | 6,28E+00 | 1,22E-02 | 1,08E-01 | Spns1    | 1,12 | No  |
| ENSMUSG00000030742 | -1,44E-01 | 0,416137934  | 3,41E-01 | 5,59E-01 | 8,22E-01 | Lat      | 0,90 | No  |

|                    |           |              |          |          |          |          |      |     |
|--------------------|-----------|--------------|----------|----------|----------|----------|------|-----|
| ENSMUSG00000030744 | -1,61E-01 | 8,719834758  | 7,91E+00 | 4,91E-03 | 5,52E-02 | Rps3     | 0,89 | No  |
| ENSMUSG00000030745 | -2,38E-01 | 8,007710883  | 1,67E+01 | 4,28E-05 | 1,19E-03 | Il21r    | 0,85 | Yes |
| ENSMUSG00000030747 | 6,32E-02  | 1,160659059  | 1,02E-01 | 7,49E-01 | 9,31E-01 | Dgat2    | 1,04 | No  |
| ENSMUSG00000030748 | -1,25E-01 | 8,501257699  | 4,75E+00 | 2,94E-02 | 1,95E-01 | Il4ra    | 0,92 | No  |
| ENSMUSG00000030750 | -2,35E-01 | 4,085120171  | 7,43E+00 | 6,42E-03 | 6,74E-02 | Nsmce1   | 0,85 | No  |
| ENSMUSG00000030751 | 5,47E-03  | 6,268603682  | 7,33E-03 | 9,32E-01 | 1,00E+00 | Psma1    | 1,00 | No  |
| ENSMUSG00000030752 | -3,54E-02 | 1,841341748  | 5,13E-02 | 8,21E-01 | 9,72E-01 | Kdm8     | 0,98 | No  |
| ENSMUSG00000030753 | -3,05E-01 | 6,968322308  | 2,52E+01 | 5,28E-07 | 2,50E-05 | Thap12   | 0,81 | Yes |
| ENSMUSG00000030754 | 1,23E-02  | 7,109773673  | 4,16E-02 | 8,38E-01 | 9,82E-01 | Copb1    | 1,01 | No  |
| ENSMUSG00000030759 | 7,66E-02  | 7,776481659  | 1,71E+00 | 1,91E-01 | 5,50E-01 | Far1     | 1,05 | No  |
| ENSMUSG00000030760 | 2,04E-01  | 5,587635379  | 8,85E+00 | 2,94E-03 | 3,77E-02 | Acer3    | 1,15 | Yes |
| ENSMUSG00000030761 | 3,29E-01  | 6,710768277  | 2,82E+01 | 1,09E-07 | 6,03E-06 | Myo7a    | 1,26 | Yes |
| ENSMUSG00000030762 | 1,85E+00  | -3,107657832 | 1,35E+00 | 2,46E-01 | 5,50E-01 | Aqp8     | 3,61 | No  |
| ENSMUSG00000030763 | 1,98E-01  | 3,978028114  | 4,91E+00 | 2,67E-02 | 1,83E-01 | Lcmt1    | 1,15 | No  |
| ENSMUSG00000030766 | 2,53E-01  | 6,39854769   | 1,60E+01 | 6,39E-05 | 1,67E-03 | Arhgap17 | 1,19 | Yes |
| ENSMUSG00000030768 | -7,98E-03 | 3,278107149  | 5,69E-03 | 9,40E-01 | 1,00E+00 | Disp1    | 0,99 | No  |
| ENSMUSG00000030769 | 1,06E-01  | 0,295495819  | 1,63E-01 | 6,87E-01 | 8,97E-01 | Slc5a11  | 1,08 | No  |
| ENSMUSG00000030770 | -9,92E-01 | -2,311154579 | 1,52E+00 | 2,17E-01 | 5,50E-01 | Parva    | 0,50 | No  |
| ENSMUSG00000030771 | 4,17E-01  | 1,006405949  | 4,14E+00 | 4,18E-02 | 2,43E-01 | Micalcl  | 1,33 | No  |
| ENSMUSG00000030772 | -3,55E+00 | -2,8319919   | 5,65E+00 | 1,74E-02 | 1,38E-01 | Dkk3     | 0,09 | No  |
| ENSMUSG00000030774 | 7,48E-02  | 6,047332278  | 1,32E+00 | 2,51E-01 | 5,50E-01 | Pak1     | 1,05 | No  |
| ENSMUSG00000030779 | 1,25E-01  | 6,921605442  | 4,16E+00 | 4,13E-02 | 2,41E-01 | Rbbp6    | 1,09 | No  |
| ENSMUSG00000030780 | 2,69E-01  | 3,975182208  | 9,05E+00 | 2,63E-03 | 3,46E-02 | BC017158 | 1,20 | Yes |
| ENSMUSG00000030781 | 2,74E-01  | 1,843811318  | 2,95E+00 | 8,59E-02 | 3,77E-01 | Slc5a2   | 1,21 | No  |
| ENSMUSG00000030782 | -3,87E-01 | -1,401271243 | 5,40E-01 | 4,63E-01 | 7,51E-01 | Tgfb1i1  | 0,76 | No  |
| ENSMUSG00000030785 | -7,40E-01 | -1,24703584  | 2,57E+00 | 1,09E-01 | 4,05E-01 | Cox6a2   | 0,60 | No  |
| ENSMUSG00000030786 | 2,85E-02  | 9,560770073  | 2,54E-01 | 6,14E-01 | 8,53E-01 | Itgam    | 1,02 | No  |
| ENSMUSG00000030787 | 2,37E+00  | -2,497636428 | 4,80E+00 | 2,84E-02 | 1,91E-01 | Lyve1    | 5,18 | No  |
| ENSMUSG00000030788 | 1,63E-01  | 5,685486553  | 5,79E+00 | 1,61E-02 | 1,32E-01 | Rnf141   | 1,12 | No  |
| ENSMUSG00000030789 | 2,17E-01  | 10,5535783   | 1,50E+01 | 1,09E-04 | 2,62E-03 | Itgax    | 1,16 | Yes |
| ENSMUSG00000030790 | -1,05E+00 | -1,24692184  | 4,61E+00 | 3,18E-02 | 2,07E-01 | Adm      | 0,48 | No  |
| ENSMUSG00000030792 | 7,16E-02  | 0,175866137  | 6,18E-02 | 8,04E-01 | 9,62E-01 | Dkk1l    | 1,05 | No  |

|                    |           |              |          |          |          |               |  |      |     |
|--------------------|-----------|--------------|----------|----------|----------|---------------|--|------|-----|
| ENSMUSG00000030793 | 1,89E-02  | 7,044278039  | 9,75E-02 | 7,55E-01 | 9,34E-01 | Pycard        |  | 1,01 | No  |
| ENSMUSG00000030795 | 9,33E-03  | 7,510735538  | 2,49E-02 | 8,75E-01 | 1,00E+00 | Fus           |  | 1,01 | No  |
| ENSMUSG00000030796 | -2,75E-01 | -0,205714366 | 7,68E-01 | 3,81E-01 | 6,82E-01 | Tead2         |  | 0,83 | No  |
| ENSMUSG00000030798 | 9,35E-02  | 5,840924796  | 1,98E+00 | 1,59E-01 | 5,07E-01 | Cd37          |  | 1,07 | No  |
| ENSMUSG00000030800 | -8,01E-01 | -1,770652573 | 1,71E+00 | 1,91E-01 | 5,50E-01 | Prss8         |  | 0,57 | No  |
| ENSMUSG00000030801 | -1,21E-01 | 3,317938946  | 1,36E+00 | 2,43E-01 | 5,50E-01 | Kat8          |  | 0,92 | No  |
| ENSMUSG00000030802 | 1,51E-01  | 5,311808655  | 4,53E+00 | 3,34E-02 | 2,14E-01 | Bckdk         |  | 1,11 | No  |
| ENSMUSG00000030804 | 1,57E-01  | 3,082025503  | 1,99E+00 | 1,58E-01 | 5,05E-01 | Gm21974       |  | 1,11 | No  |
| ENSMUSG00000030805 | -3,93E-02 | 5,868444384  | 3,51E-01 | 5,53E-01 | 8,19E-01 | Stx4a         |  | 0,97 | No  |
| ENSMUSG00000030806 | -7,42E-01 | -0,170503408 | 5,79E+00 | 1,61E-02 | 1,32E-01 | Stx1b         |  | 0,60 | No  |
| ENSMUSG00000030811 | -8,70E-02 | 4,601824443  | 1,24E+00 | 2,66E-01 | 5,62E-01 | Fbxl19        |  | 0,94 | No  |
| ENSMUSG00000030814 | -1,95E-01 | 3,292204733  | 3,53E+00 | 6,04E-02 | 3,04E-01 | Bcl7c         |  | 0,87 | No  |
| ENSMUSG00000030815 | -2,32E-02 | 5,323781135  | 1,08E-01 | 7,42E-01 | 9,27E-01 | Phkg2         |  | 0,98 | No  |
| ENSMUSG00000030816 | 2,38E-03  | 6,165622319  | 1,37E-03 | 9,71E-01 | 1,00E+00 | Rnf40         |  | 1,00 | No  |
| ENSMUSG00000030822 | -9,99E-02 | 6,312189842  | 2,48E+00 | 1,16E-01 | 4,21E-01 | Prr14         |  | 0,93 | No  |
| ENSMUSG00000030823 | 2,03E-01  | 1,545425305  | 1,39E+00 | 2,39E-01 | 5,50E-01 | 9130019O22Rik |  | 1,15 | No  |
| ENSMUSG00000030824 | 6,88E-02  | 7,423621002  | 1,34E+00 | 2,48E-01 | 5,50E-01 | Nucb1         |  | 1,05 | No  |
| ENSMUSG00000030825 | -8,72E-01 | -1,246864935 | 3,26E+00 | 7,10E-02 | 3,37E-01 | Hsd17b14      |  | 0,55 | No  |
| ENSMUSG00000030826 | -5,32E-03 | 6,009296165  | 6,61E-03 | 9,35E-01 | 1,00E+00 | Bcat2         |  | 1,00 | No  |
| ENSMUSG00000030830 | 2,49E-01  | 7,780148724  | 1,80E+01 | 2,25E-05 | 6,91E-04 | Itgal         |  | 1,19 | Yes |
| ENSMUSG00000030834 | -8,19E-01 | -2,963254278 | 3,66E-01 | 5,45E-01 | 8,13E-01 | Abcc6         |  | 0,57 | No  |
| ENSMUSG00000030835 | 3,35E-03  | 5,95093826   | 2,58E-03 | 9,60E-01 | 1,00E+00 | Nomo1         |  | 1,00 | No  |
| ENSMUSG00000030838 | -5,81E-02 | -2,548179111 | 3,08E-03 | 9,56E-01 | 1,00E+00 | Ush1c         |  | 0,96 | No  |
| ENSMUSG00000030839 | -7,46E-03 | 2,821585401  | 3,91E-03 | 9,50E-01 | 1,00E+00 | Sergef        |  | 0,99 | No  |
| ENSMUSG00000030842 | -2,44E-02 | 6,498964249  | 1,52E-01 | 6,97E-01 | 9,03E-01 | Lamtor1       |  | 0,98 | No  |
| ENSMUSG00000030844 | -1,28E-01 | 6,246166762  | 4,04E+00 | 4,45E-02 | 2,51E-01 | Rgs10         |  | 0,91 | No  |
| ENSMUSG00000030846 | 1,05E-01  | 5,650107135  | 2,39E+00 | 1,22E-01 | 4,36E-01 | Tial1         |  | 1,08 | No  |
| ENSMUSG00000030847 | 2,13E-01  | 5,466321227  | 9,43E+00 | 2,13E-03 | 2,94E-02 | Bag3          |  | 1,16 | Yes |
| ENSMUSG00000030849 | 1,46E-01  | 0,551443359  | 3,53E-01 | 5,52E-01 | 8,19E-01 | Fgfr2         |  | 1,11 | No  |
| ENSMUSG00000030850 | 8,08E-02  | 5,539299328  | 1,38E+00 | 2,40E-01 | 5,50E-01 | Ate1          |  | 1,06 | No  |
| ENSMUSG00000030851 | 7,92E-01  | -0,816424126 | 3,71E+00 | 5,42E-02 | 2,85E-01 | Ldhc          |  | 1,73 | No  |
| ENSMUSG00000030852 | -1,03E-01 | 3,330818513  | 9,98E-01 | 3,18E-01 | 6,18E-01 | Tacc2         |  | 0,93 | No  |

|                    |           |              |          |          |          |               |      |    |
|--------------------|-----------|--------------|----------|----------|----------|---------------|------|----|
| ENSMUSG00000030854 | 1,20E+00  | -1,497707806 | 3,54E+00 | 5,99E-02 | 3,03E-01 | Ptpn5         | 2,30 | No |
| ENSMUSG00000030858 | -1,72E+00 | -2,497540378 | 3,26E+00 | 7,10E-02 | 3,37E-01 | 1700007K09Rik | 0,30 | No |
| ENSMUSG00000030859 | -3,66E-01 | -2,311150316 | 1,68E-01 | 6,82E-01 | 8,94E-01 | Fam24a        | 0,78 | No |
| ENSMUSG00000030861 | 1,07E-01  | 5,94251763   | 2,66E+00 | 1,03E-01 | 3,95E-01 | Acadsb        | 1,08 | No |
| ENSMUSG00000030865 | 7,38E-01  | -1,963326052 | 1,15E+00 | 2,83E-01 | 5,80E-01 | Chp2          | 1,67 | No |
| ENSMUSG00000030866 | -2,98E+00 | -2,99797937  | 3,63E+00 | 5,66E-02 | 2,92E-01 | Ern2          | 0,13 | No |
| ENSMUSG00000030867 | 1,40E-01  | 4,841763709  | 3,39E+00 | 6,56E-02 | 3,21E-01 | Plk1          | 1,10 | No |
| ENSMUSG00000030868 | 7,13E-02  | 6,04865063   | 1,20E+00 | 2,73E-01 | 5,70E-01 | Dctn5         | 1,05 | No |
| ENSMUSG00000030869 | -8,19E-02 | 3,644644924  | 7,29E-01 | 3,93E-01 | 6,93E-01 | Ndufab1       | 0,94 | No |
| ENSMUSG00000030870 | -4,70E-02 | 5,659948517  | 4,85E-01 | 4,86E-01 | 7,73E-01 | Ubfd1         | 0,97 | No |
| ENSMUSG00000030871 | -4,73E-02 | 3,09917861   | 1,89E-01 | 6,64E-01 | 8,84E-01 | Ears2         | 0,97 | No |
| ENSMUSG00000030872 | -1,07E-01 | 5,838395934  | 2,63E+00 | 1,05E-01 | 3,97E-01 | Gga2          | 0,93 | No |
| ENSMUSG00000030873 | 1,27E+00  | -2,832019569 | 1,01E+00 | 3,15E-01 | 6,16E-01 | Scnn1b        | 2,42 | No |
| ENSMUSG00000030876 | 1,38E-01  | 5,322161893  | 3,76E+00 | 5,25E-02 | 2,79E-01 | Mettl9        | 1,10 | No |
| ENSMUSG00000030877 | -9,56E-02 | -2,548221048 | 1,06E-02 | 9,18E-01 | 1,00E+00 | Mfsd13b       | 0,94 | No |
| ENSMUSG00000030878 | 2,63E-01  | 3,105990833  | 5,72E+00 | 1,68E-02 | 1,35E-01 | Cdr2          | 1,20 | No |
| ENSMUSG00000030879 | 3,34E-02  | 5,181958141  | 2,15E-01 | 6,43E-01 | 8,72E-01 | Mrpl17        | 1,02 | No |
| ENSMUSG00000030880 | 5,59E-02  | 4,594090697  | 4,95E-01 | 4,82E-01 | 7,69E-01 | Polr3e        | 1,04 | No |
| ENSMUSG00000030881 | -6,12E-03 | 5,260070684  | 7,37E-03 | 9,32E-01 | 1,00E+00 | Arfip2        | 1,00 | No |
| ENSMUSG00000030882 | 3,49E-01  | 1,50951088   | 3,95E+00 | 4,70E-02 | 2,60E-01 | Dnhd1         | 1,27 | No |
| ENSMUSG00000030884 | -6,39E-02 | 6,238845527  | 9,94E-01 | 3,19E-01 | 6,19E-01 | Uqcrc2        | 0,96 | No |
| ENSMUSG00000030887 | -1,63E-01 | 3,047888837  | 2,09E+00 | 1,48E-01 | 4,88E-01 | Pdzd9         | 0,89 | No |
| ENSMUSG00000030888 | 2,60E-02  | 4,914514206  | 1,22E-01 | 7,27E-01 | 9,19E-01 | Rrp8          | 1,02 | No |
| ENSMUSG00000030890 | -2,41E-02 | 5,553495837  | 1,24E-01 | 7,25E-01 | 9,18E-01 | Ilk           | 0,98 | No |
| ENSMUSG00000030894 | 6,44E-02  | 8,010712126  | 1,22E+00 | 2,69E-01 | 5,65E-01 | Tpp1          | 1,05 | No |
| ENSMUSG00000030895 | -1,82E-01 | -0,726120554 | 2,25E-01 | 6,35E-01 | 8,67E-01 | Hpx           | 0,88 | No |
| ENSMUSG00000030911 | 1,87E+00  | -3,107639691 | 1,38E+00 | 2,40E-01 | 5,50E-01 | Zp2           | 3,67 | No |
| ENSMUSG00000030917 | 9,88E-02  | 4,430457976  | 1,47E+00 | 2,25E-01 | 5,50E-01 | Tmem159       | 1,07 | No |
| ENSMUSG00000030921 | -8,29E-02 | 6,861035072  | 1,85E+00 | 1,74E-01 | 5,32E-01 | Trim30a       | 0,94 | No |
| ENSMUSG00000030922 | 6,06E-02  | 1,857542196  | 1,47E-01 | 7,01E-01 | 9,05E-01 | Lym1          | 1,04 | No |
| ENSMUSG00000030924 | -2,44E-02 | 2,901715868  | 4,55E-02 | 8,31E-01 | 9,78E-01 | Rexo5         | 0,98 | No |
| ENSMUSG00000030929 | 2,90E-01  | 3,096412395  | 7,05E+00 | 7,92E-03 | 7,84E-02 | Eri2          | 1,22 | No |

|                    |           |              |           |          |          |               |      |     |
|--------------------|-----------|--------------|-----------|----------|----------|---------------|------|-----|
| ENSMUSG00000030930 | -6,99E-01 | 2,144133192  | 2,48E+01  | 6,25E-07 | 2,91E-05 | Chst15        | 0,62 | Yes |
| ENSMUSG00000030934 | -8,60E-03 | 6,73447038   | 1,95E-02  | 8,89E-01 | 1,00E+00 | Oat           | 0,99 | No  |
| ENSMUSG00000030935 | 3,44E-01  | 1,277122895  | 3,27E+00  | 7,05E-02 | 3,36E-01 | Acsm3         | 1,27 | No  |
| ENSMUSG00000030942 | 1,96E-02  | 5,235614973  | 7,56E-02  | 7,83E-01 | 9,50E-01 | Thumpd1       | 1,01 | No  |
| ENSMUSG00000030946 | -1,97E-01 | 3,166088143  | 3,31E+00  | 6,91E-02 | 3,31E-01 | Lhpp          | 0,87 | No  |
| ENSMUSG00000030956 | -1,61E-01 | 6,579378254  | 6,66E+00  | 9,85E-03 | 9,22E-02 | Fam53b        | 0,89 | No  |
| ENSMUSG00000030960 | -1,16E-01 | 2,604944429  | 8,47E-01  | 3,57E-01 | 6,59E-01 | Eef1akmt2     | 0,92 | No  |
| ENSMUSG00000030963 | -1,87E+00 | -3,107637761 | 1,39E+00  | 2,38E-01 | 5,50E-01 | Umod          | 0,27 | No  |
| ENSMUSG00000030965 | 8,07E-02  | 5,52232166   | 1,38E+00  | 2,40E-01 | 5,50E-01 | Abraxas2      | 1,06 | No  |
| ENSMUSG00000030966 | -6,94E-02 | 4,170279924  | 6,70E-01  | 4,13E-01 | 7,09E-01 | Trim21        | 0,95 | No  |
| ENSMUSG00000030967 | -1,09E-01 | 5,615172796  | 2,57E+00  | 1,09E-01 | 4,05E-01 | Zranb1        | 0,93 | No  |
| ENSMUSG00000030968 | 3,14E-02  | -3,107617333 | -7,69E-10 | 1,00E+00 | 1,00E+00 | Pdilt         | 1,02 | No  |
| ENSMUSG00000030970 | 1,38E-01  | 5,815398188  | 4,24E+00  | 3,95E-02 | 2,36E-01 | Ctbp2         | 1,10 | No  |
| ENSMUSG00000030978 | 1,74E-01  | 7,140418178  | 8,33E+00  | 3,91E-03 | 4,65E-02 | Rrm1          | 1,13 | Yes |
| ENSMUSG00000030979 | 6,32E-03  | 2,919524656  | 2,99E-03  | 9,56E-01 | 1,00E+00 | Uros          | 1,00 | No  |
| ENSMUSG00000030980 | 1,48E-01  | 5,558204707  | 4,69E+00  | 3,04E-02 | 2,00E-01 | Knop1         | 1,11 | No  |
| ENSMUSG00000030981 | -3,75E-01 | -2,185560412 | 1,77E-01  | 6,74E-01 | 8,90E-01 | Mmp21         | 0,77 | No  |
| ENSMUSG00000030982 | 4,28E-02  | 6,243417517  | 4,45E-01  | 5,05E-01 | 7,89E-01 | 9030624J02Rik | 1,03 | No  |
| ENSMUSG00000030983 | -2,49E-02 | 4,583886809  | 9,88E-02  | 7,53E-01 | 9,33E-01 | Bccip         | 0,98 | No  |
| ENSMUSG00000030986 | 8,49E-02  | 4,249737969  | 1,01E+00  | 3,15E-01 | 6,16E-01 | Dhx32         | 1,06 | No  |
| ENSMUSG00000030987 | 9,06E-02  | 5,919132997  | 1,86E+00  | 1,72E-01 | 5,29E-01 | Stim1         | 1,06 | No  |
| ENSMUSG00000030990 | 6,87E-02  | 6,687367111  | 1,24E+00  | 2,66E-01 | 5,61E-01 | Pgap2         | 1,05 | No  |
| ENSMUSG00000030996 | 2,06E-02  | -3,146103739 | -9,26E-10 | 1,00E+00 | 1,00E+00 | Art1          | 1,01 | No  |
| ENSMUSG00000031004 | 2,60E-01  | 8,711039407  | 2,07E+01  | 5,47E-06 | 1,96E-04 | Mki67         | 1,20 | Yes |
| ENSMUSG00000031015 | -1,85E-01 | 6,88211428   | 9,20E+00  | 2,42E-03 | 3,26E-02 | Swap70        | 0,88 | Yes |
| ENSMUSG00000031016 | 1,41E-01  | 4,032522852  | 2,56E+00  | 1,10E-01 | 4,06E-01 | Wee1          | 1,10 | No  |
| ENSMUSG00000031021 | -6,92E-02 | 6,107482425  | 1,14E+00  | 2,85E-01 | 5,82E-01 | Tmem9b        | 0,95 | No  |
| ENSMUSG00000031022 | -5,71E-01 | -2,2894782   | 4,83E-01  | 4,87E-01 | 7,74E-01 | BC051019      | 0,67 | No  |
| ENSMUSG00000031023 | -7,24E-02 | 3,01018717   | 4,18E-01  | 5,18E-01 | 7,98E-01 | Akip1         | 0,95 | No  |
| ENSMUSG00000031024 | -2,30E-01 | 1,395902012  | 1,84E+00  | 1,75E-01 | 5,33E-01 | St5           | 0,85 | No  |
| ENSMUSG00000031026 | 6,46E-01  | -0,980613987 | 1,98E+00  | 1,59E-01 | 5,06E-01 | Trim66        | 1,56 | No  |
| ENSMUSG00000031028 | -7,07E-02 | -2,683166064 | 3,97E-03  | 9,50E-01 | 1,00E+00 | Tub           | 0,95 | No  |

|                    |           |              |          |          |          |               |      |     |
|--------------------|-----------|--------------|----------|----------|----------|---------------|------|-----|
| ENSMUSG00000031029 | -1,10E-01 | 7,569600902  | 3,45E+00 | 6,34E-02 | 3,14E-01 | Eif3f         | 0,93 | No  |
| ENSMUSG00000031068 | -8,88E-02 | 4,633334253  | 1,29E+00 | 2,56E-01 | 5,50E-01 | Glrx3         | 0,94 | No  |
| ENSMUSG00000031072 | 2,43E-01  | 5,304495296  | 1,17E+01 | 6,38E-04 | 1,12E-02 | Oraov1        | 1,18 | Yes |
| ENSMUSG00000031074 | -1,94E+00 | -3,107619243 | 1,50E+00 | 2,21E-01 | 5,50E-01 | Fgf3          | 0,26 | No  |
| ENSMUSG00000031075 | -5,80E-02 | -2,896170637 | 1,51E-03 | 9,69E-01 | 1,00E+00 | Ano1          | 0,96 | No  |
| ENSMUSG00000031077 | 3,28E-02  | 4,126195493  | 1,46E-01 | 7,02E-01 | 9,05E-01 | Fadd          | 1,02 | No  |
| ENSMUSG00000031078 | 4,58E-02  | 4,82012302   | 3,61E-01 | 5,48E-01 | 8,15E-01 | Cttn          | 1,03 | No  |
| ENSMUSG00000031090 | 2,36E-01  | 2,877177476  | 4,12E+00 | 4,23E-02 | 2,45E-01 | Nadsyn1       | 1,18 | No  |
| ENSMUSG00000031097 | 3,41E-01  | 2,302791288  | 6,28E+00 | 1,22E-02 | 1,08E-01 | Tnni2         | 1,27 | No  |
| ENSMUSG00000031098 | -5,05E-03 | -0,946057952 | 1,40E-04 | 9,91E-01 | 1,00E+00 | Syt8          | 1,00 | No  |
| ENSMUSG00000031129 | 2,00E-01  | 3,474698253  | 3,89E+00 | 4,87E-02 | 2,66E-01 | Slc9a9        | 1,15 | No  |
| ENSMUSG00000031286 | -5,95E-01 | -1,366869465 | 9,36E-01 | 3,33E-01 | 6,34E-01 | Glt28d2       | 0,66 | No  |
| ENSMUSG00000031294 | -3,45E-01 | -2,548215208 | 1,49E-01 | 7,00E-01 | 9,04E-01 | D630029K05Rik | 0,79 | No  |
| ENSMUSG00000031441 | -3,17E-01 | 7,640295325  | 2,90E+01 | 7,39E-08 | 4,23E-06 | Atp11a        | 0,80 | Yes |
| ENSMUSG00000031442 | 2,71E-01  | 5,630992321  | 1,59E+01 | 6,69E-05 | 1,74E-03 | Mcf2l         | 1,21 | Yes |
| ENSMUSG00000031443 | 3,29E-01  | 7,973395901  | 3,17E+01 | 1,82E-08 | 1,19E-06 | F7            | 1,26 | Yes |
| ENSMUSG00000031444 | 1,65E-01  | 8,372347436  | 8,15E+00 | 4,30E-03 | 4,99E-02 | F10           | 1,12 | Yes |
| ENSMUSG00000031445 | 7,21E-02  | 3,212595327  | 4,45E-01 | 5,05E-01 | 7,89E-01 | Proz          | 1,05 | No  |
| ENSMUSG00000031446 | 7,36E-02  | 6,198654898  | 1,31E+00 | 2,52E-01 | 5,50E-01 | Cul4a         | 1,05 | No  |
| ENSMUSG00000031447 | -1,01E-02 | 10,02603815  | 3,20E-02 | 8,58E-01 | 9,94E-01 | Lamp1         | 0,99 | No  |
| ENSMUSG00000031448 | -1,23E-02 | -0,755505954 | 1,01E-03 | 9,75E-01 | 1,00E+00 | Adprhl1       | 0,99 | No  |
| ENSMUSG00000031449 | -9,30E-01 | -2,711745545 | 7,56E-01 | 3,85E-01 | 6,86E-01 | Atp4b         | 0,52 | No  |
| ENSMUSG00000031450 | 5,84E-01  | -2,31118767  | 3,81E-01 | 5,37E-01 | 8,09E-01 | Grk1          | 1,50 | No  |
| ENSMUSG00000031451 | 3,40E-01  | 3,107949253  | 8,95E+00 | 2,78E-03 | 3,61E-02 | Gas6          | 1,27 | Yes |
| ENSMUSG00000031452 | 6,57E-01  | -2,033662303 | 6,25E-01 | 4,29E-01 | 7,23E-01 | 1700029H14Rik | 1,58 | No  |
| ENSMUSG00000031453 | 9,33E-02  | 6,382719336  | 2,16E+00 | 1,42E-01 | 4,75E-01 | Rasa3         | 1,07 | No  |
| ENSMUSG00000031458 | 5,77E-02  | 3,165651605  | 2,90E-01 | 5,91E-01 | 8,41E-01 | Coprs         | 1,04 | No  |
| ENSMUSG00000031461 | -1,95E+00 | -3,033628749 | 1,50E+00 | 2,21E-01 | 5,50E-01 | Myom2         | 0,26 | No  |
| ENSMUSG00000031465 | -4,07E-01 | -0,522414042 | 1,17E+00 | 2,80E-01 | 5,76E-01 | Angpt2        | 0,75 | No  |
| ENSMUSG00000031467 | 1,24E-01  | 4,851254983  | 2,68E+00 | 1,02E-01 | 3,94E-01 | Agpat5        | 1,09 | No  |
| ENSMUSG00000031478 | -3,27E-01 | -0,088524251 | 1,13E+00 | 2,88E-01 | 5,83E-01 | Nek3          | 0,80 | No  |
| ENSMUSG00000031479 | 1,48E-01  | 4,936883506  | 3,87E+00 | 4,92E-02 | 2,68E-01 | Vps36         | 1,11 | No  |

|                    |           |              |          |          |          |               |      |     |
|--------------------|-----------|--------------|----------|----------|----------|---------------|------|-----|
| ENSMUSG00000031480 | 2,30E-01  | -1,40138455  | 1,90E-01 | 6,63E-01 | 8,83E-01 | Thsd1         | 1,17 | No  |
| ENSMUSG00000031481 | 4,51E-01  | -2,832041212 | 1,59E-01 | 6,90E-01 | 8,99E-01 | Tpte          | 1,37 | No  |
| ENSMUSG00000031482 | 1,16E-01  | 3,514836954  | 1,34E+00 | 2,47E-01 | 5,50E-01 | Slc25a15      | 1,08 | No  |
| ENSMUSG00000031483 | 7,90E-02  | 6,398881161  | 1,57E+00 | 2,10E-01 | 5,50E-01 | Erlin2        | 1,06 | No  |
| ENSMUSG00000031485 | 6,67E-02  | 6,601693038  | 1,15E+00 | 2,84E-01 | 5,80E-01 | Prosc         | 1,05 | No  |
| ENSMUSG00000031486 | 4,60E-01  | 2,593664851  | 1,30E+01 | 3,16E-04 | 6,32E-03 | Adgra2        | 1,38 | Yes |
| ENSMUSG00000031487 | 5,39E-02  | 2,968260645  | 2,25E-01 | 6,35E-01 | 8,67E-01 | Brf2          | 1,04 | No  |
| ENSMUSG00000031488 | -8,85E-02 | 6,642925987  | 2,03E+00 | 1,55E-01 | 4,98E-01 | Rab11fip1     | 0,94 | No  |
| ENSMUSG00000031489 | 1,60E+00  | -2,832030097 | 1,75E+00 | 1,86E-01 | 5,50E-01 | Adrb3         | 3,03 | No  |
| ENSMUSG00000031490 | 2,82E-01  | 5,622632322  | 1,69E+01 | 3,90E-05 | 1,10E-03 | Eif4ebp1      | 1,22 | Yes |
| ENSMUSG00000031493 | -9,73E-02 | 1,863770076  | 3,85E-01 | 5,35E-01 | 8,07E-01 | Ggn           | 0,93 | No  |
| ENSMUSG00000031494 | 6,02E-01  | 6,024314197  | 8,28E+01 | 9,20E-20 | 2,03E-17 | Cd209a        | 1,52 | Yes |
| ENSMUSG00000031495 | 4,24E-01  | 0,915934712  | 3,80E+00 | 5,13E-02 | 2,76E-01 | Cd209d        | 1,34 | No  |
| ENSMUSG00000031497 | 5,58E-01  | 1,175220818  | 8,04E+00 | 4,57E-03 | 5,22E-02 | Tnfsf13b      | 1,47 | No  |
| ENSMUSG00000031502 | -1,01E+00 | -0,895877267 | 5,62E+00 | 1,78E-02 | 1,40E-01 | Col4a1        | 0,49 | No  |
| ENSMUSG00000031503 | -9,27E-01 | 0,688966046  | 1,54E+01 | 8,87E-05 | 2,20E-03 | Col4a2        | 0,53 | Yes |
| ENSMUSG00000031504 | -5,49E-01 | 3,660548491  | 3,21E+01 | 1,48E-08 | 9,81E-07 | Rab20         | 0,68 | Yes |
| ENSMUSG00000031505 | -2,28E-01 | 4,694651999  | 8,61E+00 | 3,35E-03 | 4,15E-02 | Naxd          | 0,85 | Yes |
| ENSMUSG00000031506 | 3,22E-01  | 7,170631114  | 2,85E+01 | 9,53E-08 | 5,37E-06 | Ptpn7         | 1,25 | Yes |
| ENSMUSG00000031508 | 6,52E-02  | 5,345551626  | 8,59E-01 | 3,54E-01 | 6,55E-01 | Ankrd10       | 1,05 | No  |
| ENSMUSG00000031509 | 1,87E+00  | -3,107639691 | 1,38E+00 | 2,40E-01 | 5,50E-01 | 1700016D06Rik | 3,67 | No  |
| ENSMUSG00000031511 | 2,19E-01  | 6,711030659  | 1,26E+01 | 3,93E-04 | 7,53E-03 | Arhgef7       | 1,16 | Yes |
| ENSMUSG00000031512 | -1,70E+00 | -2,472818181 | 3,20E+00 | 7,34E-02 | 3,44E-01 | Tex29         | 0,31 | No  |
| ENSMUSG00000031513 | 8,08E-02  | 6,207429213  | 1,58E+00 | 2,09E-01 | 5,50E-01 | Leprotl1      | 1,06 | No  |
| ENSMUSG00000031516 | -1,11E-01 | 4,837632007  | 2,14E+00 | 1,44E-01 | 4,79E-01 | Dctn6         | 0,93 | No  |
| ENSMUSG00000031519 | 4,89E-02  | 2,775584777  | 1,63E-01 | 6,86E-01 | 8,97E-01 | Asb5          | 1,03 | No  |
| ENSMUSG00000031520 | -8,51E-01 | 0,07083989   | 9,55E+00 | 2,00E-03 | 2,81E-02 | Vegfc         | 0,55 | Yes |
| ENSMUSG00000031521 | 1,50E-02  | 4,288072637  | 3,18E-02 | 8,59E-01 | 9,94E-01 | Aga           | 1,01 | No  |
| ENSMUSG00000031523 | -5,82E-01 | -1,24694083  | 1,60E+00 | 2,05E-01 | 5,50E-01 | Dlc1          | 0,67 | No  |
| ENSMUSG00000031527 | 2,37E-02  | 6,095267012  | 1,34E-01 | 7,15E-01 | 9,12E-01 | Eri1          | 1,02 | No  |
| ENSMUSG00000031529 | 8,33E-02  | 7,177617035  | 1,91E+00 | 1,67E-01 | 5,21E-01 | Tnks          | 1,06 | No  |
| ENSMUSG00000031530 | -3,81E-01 | 2,974102793  | 1,06E+01 | 1,12E-03 | 1,78E-02 | Dusp4         | 0,77 | Yes |

|                    |           |              |           |          |          |         |      |     |
|--------------------|-----------|--------------|-----------|----------|----------|---------|------|-----|
| ENSMUSG00000031532 | 7,78E-02  | 6,788295521  | 1,60E+00  | 2,06E-01 | 5,50E-01 | Saraf   | 1,06 | No  |
| ENSMUSG00000031533 | 7,99E-02  | 3,382749083  | 6,13E-01  | 4,34E-01 | 7,27E-01 | Mrps31  | 1,06 | No  |
| ENSMUSG00000031534 | 3,03E-02  | 3,034793049  | 7,16E-02  | 7,89E-01 | 9,54E-01 | Smim19  | 1,02 | No  |
| ENSMUSG00000031535 | -1,88E+00 | -2,963233427 | 1,42E+00  | 2,33E-01 | 5,50E-01 | Dkk4    | 0,27 | No  |
| ENSMUSG00000031536 | -3,12E-02 | 4,142478511  | 1,33E-01  | 7,15E-01 | 9,13E-01 | Polb    | 0,98 | No  |
| ENSMUSG00000031537 | -6,32E-02 | 6,926962862  | 1,08E+00  | 2,99E-01 | 5,95E-01 | lkbkb   | 0,96 | No  |
| ENSMUSG00000031538 | -4,41E-01 | -1,711518206 | 5,17E-01  | 4,72E-01 | 7,60E-01 | Plat    | 0,74 | No  |
| ENSMUSG00000031539 | -5,31E-02 | 4,055553884  | 3,81E-01  | 5,37E-01 | 8,09E-01 | Ap3m2   | 0,96 | No  |
| ENSMUSG00000031540 | 5,72E-02  | 6,630599569  | 8,52E-01  | 3,56E-01 | 6,57E-01 | Kat6a   | 1,04 | No  |
| ENSMUSG00000031543 | 7,31E-01  | 0,269779348  | 6,76E+00  | 9,30E-03 | 8,84E-02 | Ank1    | 1,66 | No  |
| ENSMUSG00000031545 | 8,50E-02  | 6,146071201  | 1,73E+00  | 1,88E-01 | 5,50E-01 | Gpat4   | 1,06 | No  |
| ENSMUSG00000031546 | -1,11E-02 | 4,382302637  | 1,82E-02  | 8,93E-01 | 1,00E+00 | Gins4   | 0,99 | No  |
| ENSMUSG00000031548 | 1,81E+00  | -3,10765737  | 1,28E+00  | 2,58E-01 | 5,50E-01 | Sfrp1   | 3,49 | No  |
| ENSMUSG00000031549 | -7,65E-01 | -0,042475607 | 6,68E+00  | 9,73E-03 | 9,15E-02 | Ido2    | 0,59 | No  |
| ENSMUSG00000031551 | -4,53E-01 | 0,002166312  | 2,37E+00  | 1,24E-01 | 4,40E-01 | Ido1    | 0,73 | No  |
| ENSMUSG00000031553 | -1,34E+00 | -2,655111252 | 1,13E+00  | 2,88E-01 | 5,83E-01 | Adam3   | 0,39 | No  |
| ENSMUSG00000031554 | -3,83E-02 | -3,107651936 | -7,91E-11 | 1,00E+00 | 1,00E+00 | Adam5   | 0,97 | No  |
| ENSMUSG00000031555 | 5,77E-02  | 7,016895194  | 9,03E-01  | 3,42E-01 | 6,42E-01 | Adam9   | 1,04 | No  |
| ENSMUSG00000031556 | -4,41E-02 | 6,610397403  | 5,01E-01  | 4,79E-01 | 7,66E-01 | Tm2d2   | 0,97 | No  |
| ENSMUSG00000031557 | -3,36E-02 | 6,966450742  | 3,08E-01  | 5,79E-01 | 8,36E-01 | Plekha2 | 0,98 | No  |
| ENSMUSG00000031558 | -3,21E+00 | -2,770578099 | 4,34E+00  | 3,72E-02 | 2,29E-01 | Slit2   | 0,11 | No  |
| ENSMUSG00000031561 | -2,66E+00 | -3,033639428 | 2,81E+00  | 9,35E-02 | 3,83E-01 | Tenm3   | 0,16 | No  |
| ENSMUSG00000031562 | 6,89E-01  | 0,649543286  | 8,35E+00  | 3,85E-03 | 4,60E-02 | Dctd    | 1,61 | Yes |
| ENSMUSG00000031563 | 2,60E-01  | 4,692144306  | 1,09E+01  | 9,52E-04 | 1,55E-02 | Wwc2    | 1,20 | Yes |
| ENSMUSG00000031565 | 6,29E-02  | 5,546962228  | 8,36E-01  | 3,60E-01 | 6,62E-01 | Fgfr1   | 1,04 | No  |
| ENSMUSG00000031568 | 3,68E-02  | 4,39099634   | 2,01E-01  | 6,54E-01 | 8,79E-01 | Rwdd4a  | 1,03 | No  |
| ENSMUSG00000031570 | 1,16E-01  | 4,533906761  | 2,07E+00  | 1,50E-01 | 4,91E-01 | Plpp5   | 1,08 | No  |
| ENSMUSG00000031574 | 9,38E-03  | 1,273479316  | 2,41E-03  | 9,61E-01 | 1,00E+00 | Star    | 1,01 | No  |
| ENSMUSG00000031575 | 5,03E-02  | 5,019443309  | 4,67E-01  | 4,94E-01 | 7,80E-01 | Ash2l   | 1,04 | No  |
| ENSMUSG00000031576 | -4,13E-02 | -3,033659495 | 7,08E-04  | 9,79E-01 | 1,00E+00 | Kcnu1   | 0,97 | No  |
| ENSMUSG00000031577 | 1,22E-01  | 4,518819401  | 2,35E+00  | 1,26E-01 | 4,44E-01 | Tti2    | 1,09 | No  |
| ENSMUSG00000031578 | 1,40E-01  | 4,492684624  | 3,00E+00  | 8,32E-02 | 3,71E-01 | Mak16   | 1,10 | No  |



|                    |           |              |           |          |          |          |      |     |
|--------------------|-----------|--------------|-----------|----------|----------|----------|------|-----|
| ENSMUSG00000031583 | 1,93E-02  | 5,484548128  | 7,85E-02  | 7,79E-01 | 9,48E-01 | Wrn      | 1,01 | No  |
| ENSMUSG00000031584 | -1,48E-01 | 6,153516268  | 5,26E+00  | 2,18E-02 | 1,59E-01 | Gsr      | 0,90 | No  |
| ENSMUSG00000031585 | 5,01E-02  | 4,900564868  | 4,46E-01  | 5,04E-01 | 7,89E-01 | Gtf2e2   | 1,04 | No  |
| ENSMUSG00000031586 | -3,87E-01 | 3,447161653  | 1,52E+01  | 9,87E-05 | 2,40E-03 | Rbpms    | 0,76 | Yes |
| ENSMUSG00000031590 | -1,26E-01 | 4,112672696  | 2,11E+00  | 1,46E-01 | 4,84E-01 | Frg1     | 0,92 | No  |
| ENSMUSG00000031591 | 6,34E-02  | 7,632763191  | 1,16E+00  | 2,82E-01 | 5,78E-01 | Asah1    | 1,04 | No  |
| ENSMUSG00000031592 | 4,54E-02  | 5,701519894  | 4,49E-01  | 5,03E-01 | 7,88E-01 | Pcm1     | 1,03 | No  |
| ENSMUSG00000031594 | 3,14E-02  | -3,107617333 | -7,69E-10 | 1,00E+00 | 1,00E+00 | Fgl1     | 1,02 | No  |
| ENSMUSG00000031595 | -7,82E-01 | -1,863687561 | 1,25E+00  | 2,64E-01 | 5,59E-01 | Pdgfrl   | 0,58 | No  |
| ENSMUSG00000031596 | 5,45E-01  | 8,346755691  | 8,84E+01  | 5,35E-21 | 1,31E-18 | Slc7a2   | 1,46 | Yes |
| ENSMUSG00000031600 | 1,69E-01  | 5,433184329  | 5,86E+00  | 1,55E-02 | 1,29E-01 | Vps37a   | 1,12 | No  |
| ENSMUSG00000031601 | -4,24E-02 | 5,745612681  | 3,96E-01  | 5,29E-01 | 8,05E-01 | Cnot7    | 0,97 | No  |
| ENSMUSG00000031603 | 7,77E-01  | -2,226288296 | 9,02E-01  | 3,42E-01 | 6,43E-01 | Fgf20    | 1,71 | No  |
| ENSMUSG00000031604 | 2,43E-01  | 6,50154796   | 1,50E+01  | 1,06E-04 | 2,55E-03 | Msmo1    | 1,18 | Yes |
| ENSMUSG00000031605 | 4,91E-02  | 5,164546233  | 4,64E-01  | 4,96E-01 | 7,81E-01 | Klhl2    | 1,03 | No  |
| ENSMUSG00000031608 | -3,92E-02 | 6,936706963  | 4,15E-01  | 5,19E-01 | 7,99E-01 | Galnt7   | 0,97 | No  |
| ENSMUSG00000031609 | 1,09E-01  | 4,227424384  | 1,66E+00  | 1,97E-01 | 5,50E-01 | Sap30    | 1,08 | No  |
| ENSMUSG00000031613 | 8,11E-02  | -0,322247297 | 5,94E-02  | 8,07E-01 | 9,64E-01 | Hpgd     | 1,06 | No  |
| ENSMUSG00000031616 | -4,08E-01 | -2,600670305 | 1,70E-01  | 6,80E-01 | 8,93E-01 | Ednra    | 0,75 | No  |
| ENSMUSG00000031617 | 6,05E-02  | 5,139586176  | 6,91E-01  | 4,06E-01 | 7,02E-01 | Tmem184c | 1,04 | No  |
| ENSMUSG00000031618 | 4,15E-01  | -0,832115776 | 1,09E+00  | 2,97E-01 | 5,92E-01 | Nr3c2    | 1,33 | No  |
| ENSMUSG00000031622 | -2,80E-02 | 6,274573068  | 1,94E-01  | 6,60E-01 | 8,82E-01 | Sin3b    | 0,98 | No  |
| ENSMUSG00000031626 | 1,87E+00  | -3,03364371  | 1,36E+00  | 2,43E-01 | 5,50E-01 | Sorbs2   | 3,66 | No  |
| ENSMUSG00000031627 | 1,85E-01  | 6,163926929  | 8,24E+00  | 4,11E-03 | 4,82E-02 | Irf2     | 1,14 | Yes |
| ENSMUSG00000031628 | -4,47E-01 | 6,498548305  | 5,10E+01  | 9,28E-13 | 1,13E-10 | Casp3    | 0,73 | Yes |
| ENSMUSG00000031629 | -5,95E-02 | 2,848292869  | 2,63E-01  | 6,08E-01 | 8,51E-01 | Cenpu    | 0,96 | No  |
| ENSMUSG00000031631 | 1,72E-01  | 4,109416217  | 4,02E+00  | 4,51E-02 | 2,53E-01 | Cfap97   | 1,13 | No  |
| ENSMUSG00000031633 | -1,34E-01 | 7,46387135   | 5,12E+00  | 2,37E-02 | 1,69E-01 | Slc25a4  | 0,91 | No  |
| ENSMUSG00000031634 | 3,91E-02  | 5,258718582  | 2,99E-01  | 5,84E-01 | 8,38E-01 | Ufsp2    | 1,03 | No  |
| ENSMUSG00000031636 | 1,11E+00  | -2,60067749  | 1,17E+00  | 2,80E-01 | 5,77E-01 | Pdlim3   | 2,16 | No  |
| ENSMUSG00000031637 | 1,82E-01  | 0,899540707  | 6,58E-01  | 4,17E-01 | 7,12E-01 | Lrp2bp   | 1,13 | No  |
| ENSMUSG00000031639 | 5,25E-01  | 3,077536559  | 2,25E+01  | 2,11E-06 | 8,50E-05 | Tlr3     | 1,44 | Yes |

|                    |           |              |          |          |          |               |      |     |
|--------------------|-----------|--------------|----------|----------|----------|---------------|------|-----|
| ENSMUSG00000031640 | 7,72E-02  | 2,769944604  | 4,18E-01 | 5,18E-01 | 7,98E-01 | Gm45753       | 1,05 | No  |
| ENSMUSG00000031641 | -2,09E-02 | 3,458131877  | 4,45E-02 | 8,33E-01 | 9,78E-01 | Cbr4          | 0,99 | No  |
| ENSMUSG00000031642 | -2,58E-02 | 2,824312188  | 4,68E-02 | 8,29E-01 | 9,76E-01 | Sh3rf1        | 0,98 | No  |
| ENSMUSG00000031644 | -1,34E-01 | 3,897450865  | 2,22E+00 | 1,37E-01 | 4,66E-01 | Nek1          | 0,91 | No  |
| ENSMUSG00000031645 | 1,81E+00  | -3,10765737  | 1,28E+00 | 2,58E-01 | 5,50E-01 | F11           | 3,49 | No  |
| ENSMUSG00000031647 | 1,90E-01  | 3,17230242   | 3,08E+00 | 7,94E-02 | 3,61E-01 | Mfap3l        | 1,14 | No  |
| ENSMUSG00000031652 | -1,40E-02 | 6,73870017   | 5,15E-02 | 8,20E-01 | 9,72E-01 | N4bp1         | 0,99 | No  |
| ENSMUSG00000031654 | 8,62E-01  | 1,42461953   | 2,26E+01 | 2,00E-06 | 8,11E-05 | Cbln1         | 1,82 | Yes |
| ENSMUSG00000031657 | 1,79E-01  | 4,901018326  | 5,62E+00 | 1,78E-02 | 1,39E-01 | Heatr3        | 1,13 | No  |
| ENSMUSG00000031659 | 2,85E-01  | 8,835059142  | 2,49E+01 | 5,96E-07 | 2,78E-05 | Adcy7         | 1,22 | Yes |
| ENSMUSG00000031660 | -1,14E-02 | 5,976781909  | 3,05E-02 | 8,61E-01 | 9,96E-01 | Brd7          | 0,99 | No  |
| ENSMUSG00000031661 | -3,20E+00 | -2,54817416  | 4,31E+00 | 3,79E-02 | 2,31E-01 | Nkd1          | 0,11 | No  |
| ENSMUSG00000031662 | -1,54E-01 | 7,005695387  | 6,52E+00 | 1,07E-02 | 9,80E-02 | Snx20         | 0,90 | No  |
| ENSMUSG00000031666 | -3,04E-02 | 6,396936896  | 2,33E-01 | 6,29E-01 | 8,62E-01 | Rbl2          | 0,98 | No  |
| ENSMUSG00000031667 | -3,82E-02 | 4,061729138  | 1,90E-01 | 6,63E-01 | 8,83E-01 | Aktip         | 0,97 | No  |
| ENSMUSG00000031668 | 5,16E-02  | 5,773773533  | 5,98E-01 | 4,39E-01 | 7,32E-01 | Eif2ak3       | 1,04 | No  |
| ENSMUSG00000031669 | -3,31E-01 | 3,45081041   | 1,11E+01 | 8,76E-04 | 1,45E-02 | Gins3         | 0,79 | Yes |
| ENSMUSG00000031671 | 1,61E-02  | 3,146042423  | 2,24E-02 | 8,81E-01 | 1,00E+00 | Setd6         | 1,01 | No  |
| ENSMUSG00000031672 | -9,20E-02 | 6,157991087  | 2,04E+00 | 1,53E-01 | 4,96E-01 | Got2          | 0,94 | No  |
| ENSMUSG00000031673 | -8,19E-01 | -0,236331114 | 6,73E+00 | 9,49E-03 | 8,98E-02 | Cdh11         | 0,57 | No  |
| ENSMUSG00000031681 | 1,57E-01  | 4,266861598  | 3,54E+00 | 6,01E-02 | 3,03E-01 | Smad1         | 1,12 | No  |
| ENSMUSG00000031682 | -3,19E+00 | -2,655081865 | 4,30E+00 | 3,82E-02 | 2,32E-01 | 1700011L22Rik | 0,11 | No  |
| ENSMUSG00000031683 | 5,76E-02  | 4,036621932  | 4,29E-01 | 5,13E-01 | 7,95E-01 | Lsm6          | 1,04 | No  |
| ENSMUSG00000031684 | 1,36E-01  | 4,739002869  | 3,09E+00 | 7,90E-02 | 3,60E-01 | Slc10a7       | 1,10 | No  |
| ENSMUSG00000031691 | 1,14E-01  | 6,156811321  | 3,14E+00 | 7,66E-02 | 3,53E-01 | Tnpo2         | 1,08 | No  |
| ENSMUSG00000031696 | 1,22E-01  | 7,991270434  | 4,39E+00 | 3,62E-02 | 2,26E-01 | Vps35         | 1,09 | No  |
| ENSMUSG00000031697 | 6,38E-02  | 4,662999763  | 6,57E-01 | 4,18E-01 | 7,13E-01 | Orc6          | 1,05 | No  |
| ENSMUSG00000031698 | -3,78E-01 | -2,497596744 | 1,80E-01 | 6,71E-01 | 8,89E-01 | Mylk3         | 0,77 | No  |
| ENSMUSG00000031700 | 1,51E-01  | 3,829070038  | 2,74E+00 | 9,82E-02 | 3,91E-01 | Gpt2          | 1,11 | No  |
| ENSMUSG00000031701 | -7,58E-02 | 7,03653534   | 1,56E+00 | 2,11E-01 | 5,50E-01 | Dnaja2        | 0,95 | No  |
| ENSMUSG00000031703 | 3,74E-02  | 5,605361842  | 3,00E-01 | 5,84E-01 | 8,38E-01 | Itfg1         | 1,03 | No  |
| ENSMUSG00000031706 | 4,21E-02  | 4,872534396  | 3,12E-01 | 5,76E-01 | 8,35E-01 | Rfx1          | 1,03 | No  |

|                    |           |              |          |          |          |         |      |     |
|--------------------|-----------|--------------|----------|----------|----------|---------|------|-----|
| ENSMUSG00000031708 | 7,05E-02  | 5,297727853  | 9,81E-01 | 3,22E-01 | 6,22E-01 | Tecr    | 1,05 | No  |
| ENSMUSG00000031709 | 2,31E-01  | 7,102562386  | 1,46E+01 | 1,34E-04 | 3,09E-03 | Tbc1d9  | 1,17 | Yes |
| ENSMUSG00000031710 | -6,81E-01 | -0,980385365 | 2,39E+00 | 1,22E-01 | 4,36E-01 | Ucp1    | 0,62 | No  |
| ENSMUSG00000031711 | 1,21E-01  | 4,58931279   | 2,36E+00 | 1,25E-01 | 4,42E-01 | Zfp330  | 1,09 | No  |
| ENSMUSG00000031712 | -3,22E-01 | 3,424599451  | 1,04E+01 | 1,29E-03 | 1,99E-02 | Il15    | 0,80 | Yes |
| ENSMUSG00000031714 | 1,81E-02  | 4,057866022  | 4,12E-02 | 8,39E-01 | 9,83E-01 | Gab1    | 1,01 | No  |
| ENSMUSG00000031715 | 1,44E-01  | 5,374945262  | 4,21E+00 | 4,02E-02 | 2,38E-01 | Smarca5 | 1,11 | No  |
| ENSMUSG00000031722 | -4,88E-01 | 3,634190011  | 2,59E+01 | 3,55E-07 | 1,74E-05 | Hp      | 0,71 | Yes |
| ENSMUSG00000031723 | 1,04E-01  | 2,750172416  | 7,65E-01 | 3,82E-01 | 6,83E-01 | Txn14b  | 1,07 | No  |
| ENSMUSG00000031727 | 1,87E+00  | -3,107639691 | 1,38E+00 | 2,40E-01 | 5,50E-01 | Pmfbp1  | 3,67 | No  |
| ENSMUSG00000031728 | -5,90E-02 | 2,663738135  | 2,30E-01 | 6,31E-01 | 8,64E-01 | Zfp821  | 0,96 | No  |
| ENSMUSG00000031729 | -5,97E-02 | 6,614759148  | 9,22E-01 | 3,37E-01 | 6,38E-01 | Ist1    | 0,96 | No  |
| ENSMUSG00000031730 | 1,54E-01  | 3,242181259  | 2,11E+00 | 1,46E-01 | 4,85E-01 | Dhodh   | 1,11 | No  |
| ENSMUSG00000031731 | 1,14E-01  | 6,781093094  | 3,42E+00 | 6,45E-02 | 3,18E-01 | Ap1g1   | 1,08 | No  |
| ENSMUSG00000031732 | -1,48E-01 | 4,219389223  | 3,06E+00 | 8,02E-02 | 3,63E-01 | Phlpp2  | 0,90 | No  |
| ENSMUSG00000031734 | -3,18E+00 | -2,77059745  | 4,27E+00 | 3,88E-02 | 2,34E-01 | Irx3    | 0,11 | No  |
| ENSMUSG00000031736 | 7,78E-01  | 0,489627375  | 9,74E+00 | 1,81E-03 | 2,58E-02 | Crnde   | 1,72 | Yes |
| ENSMUSG00000031737 | 5,14E-01  | -1,522645762 | 9,67E-01 | 3,26E-01 | 6,26E-01 | Irx5    | 1,43 | No  |
| ENSMUSG00000031740 | -1,85E-01 | 3,887858013  | 4,13E+00 | 4,23E-02 | 2,45E-01 | Mmp2    | 0,88 | No  |
| ENSMUSG00000031748 | -4,52E-02 | -2,033651585 | 3,81E-03 | 9,51E-01 | 1,00E+00 | Gnao1   | 0,97 | No  |
| ENSMUSG00000031749 | -2,65E-01 | 5,589381723  | 1,51E+01 | 1,00E-04 | 2,42E-03 | St3gal2 | 0,83 | Yes |
| ENSMUSG00000031750 | -3,61E+00 | -2,65506321  | 5,86E+00 | 1,54E-02 | 1,29E-01 | Il34    | 0,08 | No  |
| ENSMUSG00000031751 | 2,57E-02  | 7,540015881  | 1,89E-01 | 6,64E-01 | 8,84E-01 | Amfr    | 1,02 | No  |
| ENSMUSG00000031753 | 1,80E-01  | 5,223207138  | 6,37E+00 | 1,16E-02 | 1,04E-01 | Cog4    | 1,13 | No  |
| ENSMUSG00000031754 | 5,49E-02  | 4,559309239  | 4,73E-01 | 4,92E-01 | 7,78E-01 | Nudt21  | 1,04 | No  |
| ENSMUSG00000031755 | -5,44E-02 | 2,015710855  | 1,33E-01 | 7,15E-01 | 9,13E-01 | Bbs2    | 0,96 | No  |
| ENSMUSG00000031756 | -6,72E-02 | 3,662700331  | 4,92E-01 | 4,83E-01 | 7,70E-01 | Cenpn   | 0,95 | No  |
| ENSMUSG00000031758 | -3,35E-01 | 2,791967326  | 7,85E+00 | 5,09E-03 | 5,66E-02 | Cdyl2   | 0,79 | No  |
| ENSMUSG00000031760 | -3,45E-01 | -0,485077137 | 9,37E-01 | 3,33E-01 | 6,34E-01 | Mt3     | 0,79 | No  |
| ENSMUSG00000031762 | -1,97E-03 | 5,440836093  | 8,05E-04 | 9,77E-01 | 1,00E+00 | Mt2     | 1,00 | No  |
| ENSMUSG00000031765 | 1,19E-01  | 7,663158056  | 4,07E+00 | 4,37E-02 | 2,49E-01 | Mt1     | 1,09 | No  |
| ENSMUSG00000031766 | -7,86E-02 | -1,22620341  | 3,03E-02 | 8,62E-01 | 9,96E-01 | Slc12a3 | 0,95 | No  |

|                    |           |              |          |          |          |               |      |     |
|--------------------|-----------|--------------|----------|----------|----------|---------------|------|-----|
| ENSMUSG00000031767 | 3,48E-01  | 3,355925119  | 1,13E+01 | 7,72E-04 | 1,31E-02 | Nudt7         | 1,27 | Yes |
| ENSMUSG00000031770 | -1,31E-02 | 7,228919587  | 4,75E-02 | 8,27E-01 | 9,76E-01 | Herpud1       | 0,99 | No  |
| ENSMUSG00000031774 | -7,05E-03 | 5,286919781  | 9,97E-03 | 9,20E-01 | 1,00E+00 | Fam192a       | 1,00 | No  |
| ENSMUSG00000031775 | -1,33E+00 | -2,015796997 | 3,71E+00 | 5,40E-02 | 2,84E-01 | Pllp          | 0,40 | No  |
| ENSMUSG00000031776 | -7,28E-02 | 6,206884529  | 1,28E+00 | 2,58E-01 | 5,50E-01 | Arl2bp        | 0,95 | No  |
| ENSMUSG00000031778 | -7,33E-01 | 5,761713303  | 1,21E+02 | 4,35E-28 | 2,14E-25 | Cx3cl1        | 0,60 | Yes |
| ENSMUSG00000031779 | -9,48E-01 | 10,90712646  | 2,82E+02 | 3,33E-63 | 2,00E-59 | Ccl22         | 0,52 | Yes |
| ENSMUSG00000031780 | 2,86E-02  | 10,35099992  | 2,59E-01 | 6,10E-01 | 8,52E-01 | Ccl17         | 1,02 | No  |
| ENSMUSG00000031781 | -7,92E-02 | 5,196638348  | 1,21E+00 | 2,70E-01 | 5,67E-01 | Ciapin1       | 0,95 | No  |
| ENSMUSG00000031782 | -1,92E-03 | 5,155838305  | 7,10E-04 | 9,79E-01 | 1,00E+00 | Coq9          | 1,00 | No  |
| ENSMUSG00000031783 | 1,67E-01  | 3,729104523  | 3,07E+00 | 7,97E-02 | 3,61E-01 | Polr2c        | 1,12 | No  |
| ENSMUSG00000031785 | 5,07E-01  | 1,032082988  | 5,80E+00 | 1,60E-02 | 1,32E-01 | Adgrg1        | 1,42 | No  |
| ENSMUSG00000031786 | -1,24E+00 | -2,600637655 | 1,47E+00 | 2,26E-01 | 5,50E-01 | Drc7          | 0,42 | No  |
| ENSMUSG00000031787 | 8,08E-02  | 4,22232047   | 9,03E-01 | 3,42E-01 | 6,42E-01 | Katnb1        | 1,06 | No  |
| ENSMUSG00000031788 | 2,20E-01  | 2,298784932  | 2,47E+00 | 1,16E-01 | 4,21E-01 | Kifc3         | 1,17 | No  |
| ENSMUSG00000031789 | -8,01E-01 | -1,896127859 | 1,52E+00 | 2,18E-01 | 5,50E-01 | Cngb1         | 0,57 | No  |
| ENSMUSG00000031790 | -9,83E-01 | -2,107640593 | 1,82E+00 | 1,78E-01 | 5,38E-01 | Mmp15         | 0,51 | No  |
| ENSMUSG00000031791 | 2,82E-02  | 1,120281549  | 1,95E-02 | 8,89E-01 | 1,00E+00 | Tmem38a       | 1,02 | No  |
| ENSMUSG00000031792 | 3,55E-02  | 5,433184298  | 2,57E-01 | 6,12E-01 | 8,52E-01 | Usb1          | 1,02 | No  |
| ENSMUSG00000031796 | 4,34E-02  | 5,024894076  | 3,44E-01 | 5,58E-01 | 8,21E-01 | Cfap20        | 1,03 | No  |
| ENSMUSG00000031799 | -1,20E-02 | 8,554196538  | 4,37E-02 | 8,34E-01 | 9,79E-01 | Tpm4          | 0,99 | No  |
| ENSMUSG00000031802 | -7,89E-02 | -2,226368205 | 1,16E-02 | 9,14E-01 | 1,00E+00 | Phxr4         | 0,95 | No  |
| ENSMUSG00000031803 | 2,59E-01  | 4,014972566  | 8,57E+00 | 3,41E-03 | 4,22E-02 | B3gnt3        | 1,20 | Yes |
| ENSMUSG00000031805 | -2,72E-01 | 4,97047666   | 1,35E+01 | 2,34E-04 | 4,96E-03 | Jak3          | 0,83 | Yes |
| ENSMUSG00000031807 | -4,43E-02 | 6,013959955  | 4,62E-01 | 4,97E-01 | 7,82E-01 | Pgls          | 0,97 | No  |
| ENSMUSG00000031808 | 3,23E-01  | 6,10903131   | 2,46E+01 | 6,90E-07 | 3,19E-05 | Slc27a1       | 1,25 | Yes |
| ENSMUSG00000031809 | -4,80E-02 | -2,896135597 | 1,06E-03 | 9,74E-01 | 1,00E+00 | 1700018B08Rik | 0,97 | No  |
| ENSMUSG00000031812 | 1,76E-02  | 7,30618941   | 8,65E-02 | 7,69E-01 | 9,41E-01 | Map1lc3b      | 1,01 | No  |
| ENSMUSG00000031813 | -1,75E-02 | 4,866468955  | 5,33E-02 | 8,17E-01 | 9,70E-01 | Mvb12a        | 0,99 | No  |
| ENSMUSG00000031816 | -5,99E-02 | 3,720012885  | 4,15E-01 | 5,20E-01 | 7,99E-01 | Mthfsd        | 0,96 | No  |
| ENSMUSG00000031818 | -7,11E-02 | 7,961729521  | 1,49E+00 | 2,22E-01 | 5,50E-01 | Cox4i1        | 0,95 | No  |
| ENSMUSG00000031819 | -1,58E-01 | 5,422221345  | 5,15E+00 | 2,32E-02 | 1,67E-01 | Emc8          | 0,90 | No  |

|                    |           |              |          |          |          |               |      |     |
|--------------------|-----------|--------------|----------|----------|----------|---------------|------|-----|
| ENSMUSG00000031820 | -7,97E-02 | 5,841695762  | 1,43E+00 | 2,32E-01 | 5,50E-01 | Babam1        | 0,95 | No  |
| ENSMUSG00000031821 | 7,84E-02  | 5,194295007  | 1,19E+00 | 2,75E-01 | 5,72E-01 | Gins2         | 1,06 | No  |
| ENSMUSG00000031822 | 9,39E-02  | 5,995206297  | 2,07E+00 | 1,50E-01 | 4,91E-01 | Gse1          | 1,07 | No  |
| ENSMUSG00000031823 | 7,15E-02  | 5,985708012  | 1,19E+00 | 2,76E-01 | 5,72E-01 | Zdhhc7        | 1,05 | No  |
| ENSMUSG00000031824 | 1,98E-01  | 5,566553184  | 8,37E+00 | 3,81E-03 | 4,56E-02 | 6430548M08Rik | 1,15 | Yes |
| ENSMUSG00000031825 | -1,06E+00 | 2,995695573  | 9,32E+01 | 4,83E-22 | 1,35E-19 | Crispld2      | 0,48 | Yes |
| ENSMUSG00000031826 | 2,11E-01  | 4,842668911  | 7,77E+00 | 5,32E-03 | 5,85E-02 | Usp10         | 1,16 | No  |
| ENSMUSG00000031827 | 8,49E-02  | 9,938603195  | 2,28E+00 | 1,31E-01 | 4,56E-01 | Cotl1         | 1,06 | No  |
| ENSMUSG00000031828 | 1,44E-01  | 4,106849163  | 2,74E+00 | 9,76E-02 | 3,90E-01 | Klhl36        | 1,11 | No  |
| ENSMUSG00000031831 | 1,43E-01  | 0,92756405   | 4,62E-01 | 4,97E-01 | 7,82E-01 | Dnaaf1        | 1,10 | No  |
| ENSMUSG00000031832 | 2,70E-01  | 3,824211176  | 8,65E+00 | 3,27E-03 | 4,09E-02 | Taf1c         | 1,21 | Yes |
| ENSMUSG00000031833 | 1,78E-01  | 6,509598349  | 8,09E+00 | 4,44E-03 | 5,10E-02 | Mast3         | 1,13 | No  |
| ENSMUSG00000031834 | 1,88E-02  | 5,672443693  | 7,71E-02 | 7,81E-01 | 9,49E-01 | Pik3r2        | 1,01 | No  |
| ENSMUSG00000031835 | 3,34E-02  | 6,529899657  | 2,87E-01 | 5,92E-01 | 8,42E-01 | Mbtps1        | 1,02 | No  |
| ENSMUSG00000031837 | -2,68E+00 | -2,896144247 | 2,85E+00 | 9,15E-02 | 3,82E-01 | Necab2        | 0,16 | No  |
| ENSMUSG00000031838 | -1,83E-02 | 8,187736831  | 9,99E-02 | 7,52E-01 | 9,32E-01 | lfi30         | 0,99 | No  |
| ENSMUSG00000031839 | 2,32E-02  | 6,273167246  | 1,32E-01 | 7,16E-01 | 9,13E-01 | Hsbp1         | 1,02 | No  |
| ENSMUSG00000031840 | 4,99E-01  | 1,191015107  | 6,60E+00 | 1,02E-02 | 9,49E-02 | Rab3a         | 1,41 | No  |
| ENSMUSG00000031842 | -3,74E-01 | -2,401456946 | 1,76E-01 | 6,75E-01 | 8,91E-01 | Pde4c         | 0,77 | No  |
| ENSMUSG00000031843 | 2,32E-01  | 3,577451455  | 5,58E+00 | 1,81E-02 | 1,42E-01 | Mphosph6      | 1,17 | No  |
| ENSMUSG00000031845 | 7,05E-01  | -2,963278876 | 2,69E-01 | 6,04E-01 | 8,49E-01 | Bco1          | 1,63 | No  |
| ENSMUSG00000031847 | -1,71E-01 | 0,425813137  | 4,88E-01 | 4,85E-01 | 7,72E-01 | 1700030J22Rik | 0,89 | No  |
| ENSMUSG00000031848 | -1,11E-01 | 5,369591123  | 2,47E+00 | 1,16E-01 | 4,21E-01 | Lsm4          | 0,93 | No  |
| ENSMUSG00000031849 | -2,45E-02 | 0,244551169  | 8,14E-03 | 9,28E-01 | 1,00E+00 | Comp          | 0,98 | No  |
| ENSMUSG00000031851 | 8,31E-02  | 3,94243219   | 8,49E-01 | 3,57E-01 | 6,58E-01 | Ntpcr         | 1,06 | No  |
| ENSMUSG00000031853 | 2,67E+00  | -3,033636951 | 2,76E+00 | 9,68E-02 | 3,88E-01 | Map3k21       | 6,36 | No  |
| ENSMUSG00000031858 | -1,31E-02 | 6,462165734  | 4,35E-02 | 8,35E-01 | 9,80E-01 | Mau2          | 0,99 | No  |
| ENSMUSG00000031860 | 2,12E-01  | -2,448618302 | 5,62E-02 | 8,13E-01 | 9,67E-01 | Pbx4          | 1,16 | No  |
| ENSMUSG00000031861 | 2,19E-01  | 2,323944517  | 2,61E+00 | 1,07E-01 | 3,99E-01 | Lpar2         | 1,16 | No  |
| ENSMUSG00000031862 | 1,38E-01  | 6,444677498  | 4,80E+00 | 2,85E-02 | 1,91E-01 | Atp13a1       | 1,10 | No  |
| ENSMUSG00000031864 | 1,44E-01  | 4,765922154  | 3,56E+00 | 5,92E-02 | 3,01E-01 | Ints10        | 1,11 | No  |
| ENSMUSG00000031865 | 2,73E-02  | 7,279874055  | 2,08E-01 | 6,48E-01 | 8,75E-01 | Dctn1         | 1,02 | No  |

|                    |           |              |          |          |          |               |      |     |
|--------------------|-----------|--------------|----------|----------|----------|---------------|------|-----|
| ENSMUSG00000031870 | 8,65E-01  | -2,448637117 | 9,01E-01 | 3,43E-01 | 6,43E-01 | Pgr           | 1,82 | No  |
| ENSMUSG00000031871 | 4,13E-01  | 1,428553774  | 5,11E+00 | 2,38E-02 | 1,69E-01 | Cdh5          | 1,33 | No  |
| ENSMUSG00000031872 | -1,21E-01 | -1,185691451 | 6,41E-02 | 8,00E-01 | 9,60E-01 | Bean1         | 0,92 | No  |
| ENSMUSG00000031875 | 1,88E-01  | 6,924140653  | 9,53E+00 | 2,02E-03 | 2,83E-02 | Cmtm3         | 1,14 | Yes |
| ENSMUSG00000031876 | 1,55E-01  | -2,370500987 | 2,93E-02 | 8,64E-01 | 9,97E-01 | Gm45711       | 1,11 | No  |
| ENSMUSG00000031877 | -7,47E-01 | -2,497598382 | 6,26E-01 | 4,29E-01 | 7,23E-01 | Ces2g         | 0,60 | No  |
| ENSMUSG00000031878 | -2,08E-01 | 3,998316691  | 5,50E+00 | 1,90E-02 | 1,46E-01 | Nae1          | 0,87 | No  |
| ENSMUSG00000031879 | -2,31E-01 | 3,649984108  | 5,81E+00 | 1,60E-02 | 1,31E-01 | Fam96b        | 0,85 | No  |
| ENSMUSG00000031880 | -4,47E-01 | 0,458196844  | 3,19E+00 | 7,43E-02 | 3,47E-01 | Rrad          | 0,73 | No  |
| ENSMUSG00000031881 | -2,74E+00 | -3,033596063 | 2,99E+00 | 8,38E-02 | 3,71E-01 | Cdh16         | 0,15 | No  |
| ENSMUSG00000031883 | 2,14E-01  | -0,389782407 | 3,85E-01 | 5,35E-01 | 8,08E-01 | Car7          | 1,16 | No  |
| ENSMUSG00000031884 | -5,04E-02 | -2,740892023 | 1,73E-03 | 9,67E-01 | 1,00E+00 | Ces2d-ps      | 0,97 | No  |
| ENSMUSG00000031885 | 1,80E-01  | 7,441213931  | 9,17E+00 | 2,47E-03 | 3,30E-02 | Cbfb          | 1,13 | Yes |
| ENSMUSG00000031887 | -5,53E-02 | 4,760677264  | 5,21E-01 | 4,71E-01 | 7,59E-01 | Tradd         | 0,96 | No  |
| ENSMUSG00000031889 | 1,20E-01  | 4,2274053    | 2,05E+00 | 1,52E-01 | 4,94E-01 | D230025D16Rik | 1,09 | No  |
| ENSMUSG00000031891 | 3,38E-01  | 3,238910317  | 9,91E+00 | 1,65E-03 | 2,39E-02 | Hsd11b2       | 1,26 | Yes |
| ENSMUSG00000031893 | 1,26E+00  | -1,801134937 | 3,68E+00 | 5,51E-02 | 2,88E-01 | Tsnaxip1      | 2,40 | No  |
| ENSMUSG00000031896 | 5,17E-01  | 0,078984004  | 3,37E+00 | 6,64E-02 | 3,24E-01 | Ctrl          | 1,43 | No  |
| ENSMUSG00000031897 | -1,59E-01 | 5,764777809  | 5,61E+00 | 1,79E-02 | 1,40E-01 | Psmb10        | 0,90 | No  |
| ENSMUSG00000031898 | -2,39E-01 | 4,261193419  | 7,89E+00 | 4,96E-03 | 5,57E-02 | Dpep3         | 0,85 | No  |
| ENSMUSG00000031901 | -4,19E-02 | 3,280733638  | 1,57E-01 | 6,92E-01 | 9,00E-01 | Dus2          | 0,97 | No  |
| ENSMUSG00000031902 | 9,15E-02  | 6,844052092  | 2,23E+00 | 1,35E-01 | 4,63E-01 | Nfatc3        | 1,07 | No  |
| ENSMUSG00000031903 | 1,33E-01  | 7,206165267  | 4,95E+00 | 2,61E-02 | 1,80E-01 | Pla2g15       | 1,10 | No  |
| ENSMUSG00000031904 | -1,34E-01 | 5,159696197  | 3,47E+00 | 6,26E-02 | 3,12E-01 | Slc7a6        | 0,91 | No  |
| ENSMUSG00000031906 | 3,04E-02  | -0,195806954 | 8,53E-03 | 9,26E-01 | 1,00E+00 | Smpd3         | 1,02 | No  |
| ENSMUSG00000031907 | 3,13E-01  | 4,104299609  | 1,30E+01 | 3,16E-04 | 6,32E-03 | Zfp90         | 1,24 | Yes |
| ENSMUSG00000031910 | 3,47E-02  | 3,499848172  | 1,22E-01 | 7,27E-01 | 9,19E-01 | Has3          | 1,02 | No  |
| ENSMUSG00000031913 | -1,12E-02 | 5,434570834  | 2,58E-02 | 8,72E-01 | 1,00E+00 | Vps4a         | 0,99 | No  |
| ENSMUSG00000031916 | 1,03E-01  | 5,583004284  | 2,26E+00 | 1,33E-01 | 4,59E-01 | Cog8          | 1,07 | No  |
| ENSMUSG00000031917 | -6,47E-02 | 4,743664767  | 6,98E-01 | 4,04E-01 | 7,01E-01 | Nip7          | 0,96 | No  |
| ENSMUSG00000031918 | 4,69E-02  | 5,388355967  | 4,43E-01 | 5,06E-01 | 7,90E-01 | Mttr2         | 1,03 | No  |
| ENSMUSG00000031919 | 1,35E+00  | -1,831981257 | 3,94E+00 | 4,71E-02 | 2,60E-01 | Tmed6         | 2,54 | No  |

|                    |           |              |           |          |          |               |       |     |
|--------------------|-----------|--------------|-----------|----------|----------|---------------|-------|-----|
| ENSMUSG00000031921 | 3,15E-02  | 4,562307841  | 1,62E-01  | 6,88E-01 | 8,98E-01 | Terf2         | 1,02  | No  |
| ENSMUSG00000031922 | 1,15E-02  | 4,918375268  | 2,36E-02  | 8,78E-01 | 1,00E+00 | Cep57         | 1,01  | No  |
| ENSMUSG00000031924 | 1,72E-01  | 7,727766864  | 8,60E+00  | 3,36E-03 | 4,17E-02 | Cyb5b         | 1,13  | Yes |
| ENSMUSG00000031925 | 3,81E-01  | 4,11939073   | 1,91E+01  | 1,24E-05 | 4,07E-04 | Maml2         | 1,30  | Yes |
| ENSMUSG00000031927 | -1,89E+00 | -3,1076441   | 1,42E+00  | 2,33E-01 | 5,50E-01 | 1700012B09Rik | 0,27  | No  |
| ENSMUSG00000031928 | 9,35E-02  | 4,760902998  | 1,48E+00  | 2,24E-01 | 5,50E-01 | Mre11a        | 1,07  | No  |
| ENSMUSG00000031930 | 3,36E-02  | 6,216573245  | 2,75E-01  | 6,00E-01 | 8,47E-01 | Wwp2          | 1,02  | No  |
| ENSMUSG00000031931 | 7,43E-02  | 4,343837693  | 8,11E-01  | 3,68E-01 | 6,69E-01 | Ankrd49       | 1,05  | No  |
| ENSMUSG00000031932 | -1,18E+00 | -2,655080443 | 1,33E+00  | 2,48E-01 | 5,50E-01 | Gpr83         | 0,44  | No  |
| ENSMUSG00000031933 | 1,81E+00  | -3,10765737  | 1,28E+00  | 2,58E-01 | 5,50E-01 | Izumo1r       | 3,49  | No  |
| ENSMUSG00000031934 | -2,26E-01 | 4,298612939  | 7,30E+00  | 6,89E-03 | 7,09E-02 | Panx1         | 0,86  | No  |
| ENSMUSG00000031935 | 6,64E-02  | 5,469740999  | 9,22E-01  | 3,37E-01 | 6,38E-01 | Med17         | 1,05  | No  |
| ENSMUSG00000031936 | -3,19E+00 | -2,896117911 | 4,30E+00  | 3,81E-02 | 2,32E-01 | Heph11        | 0,11  | No  |
| ENSMUSG00000031937 | 3,80E+00  | -2,600708295 | 6,68E+00  | 9,76E-03 | 9,16E-02 | Vstm5         | 13,97 | No  |
| ENSMUSG00000031938 | -1,00E-02 | 5,117703586  | 1,91E-02  | 8,90E-01 | 1,00E+00 | 4931406C07Rik | 0,99  | No  |
| ENSMUSG00000031939 | -2,12E-01 | 5,33543342   | 8,95E+00  | 2,77E-03 | 3,60E-02 | Taf1d         | 0,86  | Yes |
| ENSMUSG00000031948 | -6,77E-03 | 5,885243583  | 1,05E-02  | 9,19E-01 | 1,00E+00 | Kars          | 1,00  | No  |
| ENSMUSG00000031949 | -1,08E-01 | 1,002097506  | 3,05E-01  | 5,81E-01 | 8,37E-01 | Adat1         | 0,93  | No  |
| ENSMUSG00000031950 | -1,09E-01 | 4,120567544  | 1,59E+00  | 2,07E-01 | 5,50E-01 | Gabarapl2     | 0,93  | No  |
| ENSMUSG00000031951 | 2,69E-01  | 0,464576193  | 1,10E+00  | 2,95E-01 | 5,90E-01 | Tmem231       | 1,21  | No  |
| ENSMUSG00000031953 | 1,37E-01  | 0,943766064  | 4,49E-01  | 5,03E-01 | 7,88E-01 | Tmem170       | 1,10  | No  |
| ENSMUSG00000031954 | -1,00E-01 | 5,350542155  | 2,03E+00  | 1,54E-01 | 4,97E-01 | Cfdp1         | 0,93  | No  |
| ENSMUSG00000031955 | 7,43E-01  | -1,289611598 | 2,36E+00  | 1,25E-01 | 4,42E-01 | Bcar1         | 1,67  | No  |
| ENSMUSG00000031957 | 3,14E-02  | -3,107617333 | -7,69E-10 | 1,00E+00 | 1,00E+00 | Ctrb1         | 1,02  | No  |
| ENSMUSG00000031958 | -8,59E-02 | 0,999643063  | 1,72E-01  | 6,78E-01 | 8,92E-01 | Ldhd          | 0,94  | No  |
| ENSMUSG00000031959 | 1,09E-01  | 3,644452062  | 1,27E+00  | 2,59E-01 | 5,52E-01 | Wdr59         | 1,08  | No  |
| ENSMUSG00000031960 | 4,79E-02  | 7,195093276  | 6,36E-01  | 4,25E-01 | 7,19E-01 | Aars          | 1,03  | No  |
| ENSMUSG00000031962 | 7,30E-01  | -2,655143745 | 2,91E-01  | 5,90E-01 | 8,41E-01 | Cdh15         | 1,66  | No  |
| ENSMUSG00000031963 | -1,46E-01 | -1,165802316 | 1,02E-01  | 7,49E-01 | 9,31E-01 | Bmper         | 0,90  | No  |
| ENSMUSG00000031965 | -1,89E+00 | -3,1076441   | 1,42E+00  | 2,33E-01 | 5,50E-01 | Tbx20         | 0,27  | No  |
| ENSMUSG00000031967 | 1,18E-01  | 5,710047588  | 3,06E+00  | 8,04E-02 | 3,64E-01 | Afg3l1        | 1,09  | No  |
| ENSMUSG00000031969 | 5,05E-02  | 4,539149933  | 4,02E-01  | 5,26E-01 | 8,03E-01 | Acad8         | 1,04  | No  |

|                    |           |              |           |          |          |               |      |     |
|--------------------|-----------|--------------|-----------|----------|----------|---------------|------|-----|
| ENSMUSG00000031970 | -9,62E-02 | 1,708227219  | 3,33E-01  | 5,64E-01 | 8,27E-01 | Dbnidd1       | 0,94 | No  |
| ENSMUSG00000031971 | 2,67E-01  | 2,406678805  | 4,21E+00  | 4,03E-02 | 2,38E-01 | Ccsap         | 1,20 | No  |
| ENSMUSG00000031972 | -1,87E+00 | -3,107637761 | 1,39E+00  | 2,38E-01 | 5,50E-01 | Acta1         | 0,27 | No  |
| ENSMUSG00000031974 | 1,56E-01  | 4,829845047  | 4,17E+00  | 4,11E-02 | 2,41E-01 | Abcb10        | 1,11 | No  |
| ENSMUSG00000031976 | 1,70E-01  | 4,373971638  | 4,28E+00  | 3,86E-02 | 2,33E-01 | Urb2          | 1,13 | No  |
| ENSMUSG00000031979 | 4,95E-02  | 5,284489478  | 4,85E-01  | 4,86E-01 | 7,73E-01 | Cog2          | 1,03 | No  |
| ENSMUSG00000031980 | -2,65E+00 | -2,963248364 | 2,80E+00  | 9,42E-02 | 3,84E-01 | Agt           | 0,16 | No  |
| ENSMUSG00000031981 | -6,25E-02 | -2,831990963 | 1,72E-03  | 9,67E-01 | 1,00E+00 | Capn9         | 0,96 | No  |
| ENSMUSG00000031982 | 3,55E-01  | 1,988265019  | 5,52E+00  | 1,88E-02 | 1,45E-01 | Arv1          | 1,28 | No  |
| ENSMUSG00000031983 | 2,41E-01  | 4,536794263  | 9,01E+00  | 2,68E-03 | 3,51E-02 | 2310022B05Rik | 1,18 | Yes |
| ENSMUSG00000031984 | 1,19E-01  | 4,466945842  | 2,16E+00  | 1,42E-01 | 4,76E-01 | 2810004N23Rik | 1,09 | No  |
| ENSMUSG00000031985 | 8,69E-02  | 5,677187685  | 1,64E+00  | 2,00E-01 | 5,50E-01 | Gnpat         | 1,06 | No  |
| ENSMUSG00000031986 | 2,59E-05  | 5,081293088  | 1,20E-07  | 1,00E+00 | 1,00E+00 | Sprtn         | 1,00 | No  |
| ENSMUSG00000031987 | 1,52E-01  | 6,18694667   | 5,57E+00  | 1,83E-02 | 1,42E-01 | Egln1         | 1,11 | No  |
| ENSMUSG00000031988 | 8,07E-02  | 5,942708942  | 1,50E+00  | 2,20E-01 | 5,50E-01 | Vps26b        | 1,06 | No  |
| ENSMUSG00000031990 | 5,74E-01  | 1,097630772  | 7,57E+00  | 5,93E-03 | 6,36E-02 | Jam3          | 1,49 | No  |
| ENSMUSG00000031993 | 1,16E-01  | 5,776403392  | 2,98E+00  | 8,46E-02 | 3,73E-01 | Snx19         | 1,08 | No  |
| ENSMUSG00000031994 | -1,22E+00 | -3,070169701 | 7,07E-01  | 4,01E-01 | 6,99E-01 | Adamts8       | 0,43 | No  |
| ENSMUSG00000031995 | -4,80E-01 | 4,83865481   | 4,04E+01  | 2,07E-10 | 1,85E-08 | St14          | 0,72 | Yes |
| ENSMUSG00000031996 | -4,82E-02 | 9,10160949   | 7,21E-01  | 3,96E-01 | 6,96E-01 | Aplp2         | 0,97 | No  |
| ENSMUSG00000031997 | 3,14E-02  | -3,107617333 | -7,69E-10 | 1,00E+00 | 1,00E+00 | Trpc6         | 1,02 | No  |
| ENSMUSG00000032000 | -3,53E-01 | 6,582426499  | 3,23E+01  | 1,33E-08 | 8,96E-07 | Birc3         | 0,78 | Yes |
| ENSMUSG00000032002 | 4,01E-02  | 5,430807381  | 3,30E-01  | 5,66E-01 | 8,28E-01 | Dcun1d5       | 1,03 | No  |
| ENSMUSG00000032009 | -3,70E-01 | 5,711997315  | 3,06E+01  | 3,24E-08 | 2,00E-06 | Sesn3         | 0,77 | Yes |
| ENSMUSG00000032010 | 1,47E-01  | 0,995272983  | 5,09E-01  | 4,76E-01 | 7,64E-01 | Usp2          | 1,11 | No  |
| ENSMUSG00000032011 | -1,47E+00 | 1,338305721  | 6,26E+01  | 2,59E-15 | 4,09E-13 | Thy1          | 0,36 | Yes |
| ENSMUSG00000032012 | -3,39E-01 | 3,671411384  | 1,29E+01  | 3,37E-04 | 6,66E-03 | Nectin1       | 0,79 | Yes |
| ENSMUSG00000032013 | 1,10E-01  | 2,725245845  | 8,06E-01  | 3,69E-01 | 6,71E-01 | Trim29        | 1,08 | No  |
| ENSMUSG00000032014 | 6,71E-01  | 0,804197553  | 8,73E+00  | 3,13E-03 | 3,95E-02 | Oaf           | 1,59 | Yes |
| ENSMUSG00000032017 | -5,45E-02 | -2,832025911 | 1,34E-03  | 9,71E-01 | 1,00E+00 | Grik4         | 0,96 | No  |
| ENSMUSG00000032018 | 1,50E-01  | 5,609550858  | 4,86E+00  | 2,74E-02 | 1,87E-01 | Sc5d          | 1,11 | No  |
| ENSMUSG00000032020 | 8,77E-03  | 6,733802684  | 2,02E-02  | 8,87E-01 | 1,00E+00 | Ubash3b       | 1,01 | No  |



|                    |           |              |          |          |          |               |      |     |
|--------------------|-----------|--------------|----------|----------|----------|---------------|------|-----|
| ENSMUSG00000032021 | -7,40E-01 | -0,355411012 | 3,68E+00 | 5,51E-02 | 2,88E-01 | Crtam         | 0,60 | No  |
| ENSMUSG00000032024 | 4,13E-02  | 4,613530306  | 2,76E-01 | 5,99E-01 | 8,46E-01 | Clmp          | 1,03 | No  |
| ENSMUSG00000032026 | -4,48E-02 | 5,881869209  | 4,56E-01 | 4,99E-01 | 7,85E-01 | Rexo2         | 0,97 | No  |
| ENSMUSG00000032028 | -1,68E+00 | -2,401364405 | 3,09E+00 | 7,87E-02 | 3,59E-01 | Nxpe2         | 0,31 | No  |
| ENSMUSG00000032030 | 1,27E-01  | 4,977105099  | 2,92E+00 | 8,73E-02 | 3,78E-01 | Cul5          | 1,09 | No  |
| ENSMUSG00000032033 | -1,22E+00 | -2,44860177  | 1,93E+00 | 1,65E-01 | 5,18E-01 | Barx2         | 0,43 | No  |
| ENSMUSG00000032034 | -1,89E+00 | -3,033648118 | 1,42E+00 | 2,33E-01 | 5,50E-01 | Kcnj5         | 0,27 | No  |
| ENSMUSG00000032035 | 3,09E-01  | 0,666365533  | 1,87E+00 | 1,71E-01 | 5,27E-01 | Ets1          | 1,24 | No  |
| ENSMUSG00000032036 | -3,56E-01 | -0,485250186 | 7,80E-01 | 3,77E-01 | 6,78E-01 | Kirrel3       | 0,78 | No  |
| ENSMUSG00000032038 | -1,15E-02 | 5,628958515  | 2,85E-02 | 8,66E-01 | 9,99E-01 | St3gal4       | 0,99 | No  |
| ENSMUSG00000032040 | -7,07E-02 | 4,30477275   | 7,18E-01 | 3,97E-01 | 6,97E-01 | Dcps          | 0,95 | No  |
| ENSMUSG00000032041 | 3,29E-01  | 4,317344065  | 1,55E+01 | 8,29E-05 | 2,07E-03 | Tirap         | 1,26 | Yes |
| ENSMUSG00000032042 | 3,59E-02  | 6,256834421  | 3,15E-01 | 5,75E-01 | 8,34E-01 | Srpr          | 1,03 | No  |
| ENSMUSG00000032044 | 5,84E-02  | 3,964747723  | 4,32E-01 | 5,11E-01 | 7,94E-01 | Rpusd4        | 1,04 | No  |
| ENSMUSG00000032046 | 1,37E-01  | 6,390161784  | 4,71E+00 | 3,00E-02 | 1,99E-01 | Abhd12        | 1,10 | No  |
| ENSMUSG00000032047 | -2,85E-01 | 6,400466653  | 2,04E+01 | 6,20E-06 | 2,18E-04 | Acat1         | 0,82 | Yes |
| ENSMUSG00000032050 | -6,66E-02 | 7,072875881  | 1,22E+00 | 2,70E-01 | 5,66E-01 | Rdx           | 0,95 | No  |
| ENSMUSG00000032051 | -3,59E-02 | 3,36596152   | 1,21E-01 | 7,28E-01 | 9,20E-01 | Fdx1          | 0,98 | No  |
| ENSMUSG00000032053 | -1,00E+00 | -2,40135181  | 1,22E+00 | 2,69E-01 | 5,66E-01 | Pou2af1       | 0,50 | No  |
| ENSMUSG00000032056 | -8,61E-01 | -2,896108407 | 4,07E-01 | 5,23E-01 | 8,01E-01 | Btg4          | 0,55 | No  |
| ENSMUSG00000032057 | -3,74E-01 | -2,070172102 | 3,24E-01 | 5,69E-01 | 8,30E-01 | 4833427G06Rik | 0,77 | No  |
| ENSMUSG00000032058 | 7,73E-02  | 5,599275657  | 1,28E+00 | 2,57E-01 | 5,50E-01 | Ppp2r1b       | 1,06 | No  |
| ENSMUSG00000032059 | -3,71E-02 | 4,358053984  | 2,03E-01 | 6,52E-01 | 8,77E-01 | Alg9          | 0,97 | No  |
| ENSMUSG00000032060 | 1,73E-01  | 1,175764913  | 8,01E-01 | 3,71E-01 | 6,72E-01 | Cryab         | 1,13 | No  |
| ENSMUSG00000032062 | -5,70E-02 | -1,963290753 | 6,04E-03 | 9,38E-01 | 1,00E+00 | 2310030G06Rik | 0,96 | No  |
| ENSMUSG00000032064 | 3,13E-01  | -0,070362458 | 1,05E+00 | 3,05E-01 | 6,02E-01 | Dixdc1        | 1,24 | No  |
| ENSMUSG00000032065 | 8,89E-01  | -1,711734775 | 2,27E+00 | 1,32E-01 | 4,57E-01 | Tex12         | 1,85 | No  |
| ENSMUSG00000032066 | 2,78E-01  | 1,438650229  | 2,31E+00 | 1,28E-01 | 4,49E-01 | Bco2          | 1,21 | No  |
| ENSMUSG00000032067 | -1,11E-01 | 5,682713826  | 2,71E+00 | 9,99E-02 | 3,92E-01 | Pts           | 0,93 | No  |
| ENSMUSG00000032068 | 2,25E-01  | 10,42192372  | 1,61E+01 | 6,11E-05 | 1,61E-03 | Plet1         | 1,17 | Yes |
| ENSMUSG00000032076 | 2,41E-01  | 1,991062795  | 2,52E+00 | 1,13E-01 | 4,14E-01 | Cadm1         | 1,18 | No  |
| ENSMUSG00000032077 | -6,97E-03 | 3,782798546  | 5,52E-03 | 9,41E-01 | 1,00E+00 | Bud13         | 1,00 | No  |

|                    |           |              |           |          |          |         |      |     |
|--------------------|-----------|--------------|-----------|----------|----------|---------|------|-----|
| ENSMUSG00000032078 | -5,29E-02 | 5,28986474   | 5,57E-01  | 4,55E-01 | 7,45E-01 | Zpr1    | 0,96 | No  |
| ENSMUSG00000032079 | -1,27E+00 | -3,146104694 | 7,49E-01  | 3,87E-01 | 6,87E-01 | Apoa5   | 0,42 | No  |
| ENSMUSG00000032080 | -1,23E+00 | -3,146117124 | 7,12E-01  | 3,99E-01 | 6,98E-01 | Apoa4   | 0,42 | No  |
| ENSMUSG00000032083 | -1,92E+00 | -3,033623267 | 1,46E+00  | 2,27E-01 | 5,50E-01 | Apoa1   | 0,26 | No  |
| ENSMUSG00000032085 | 1,17E-01  | 2,155452464  | 6,46E-01  | 4,22E-01 | 7,17E-01 | Tagln   | 1,08 | No  |
| ENSMUSG00000032086 | 8,33E-03  | 4,498008362  | 1,08E-02  | 9,17E-01 | 1,00E+00 | Bace1   | 1,01 | No  |
| ENSMUSG00000032087 | -4,97E-01 | 1,66293803   | 9,76E+00  | 1,79E-03 | 2,56E-02 | Dscaml1 | 0,71 | Yes |
| ENSMUSG00000032089 | -1,62E-02 | 7,742372332  | 7,59E-02  | 7,83E-01 | 9,50E-01 | Il10ra  | 0,99 | No  |
| ENSMUSG00000032091 | -7,93E-02 | -1,436775059 | 2,58E-02  | 8,72E-01 | 1,00E+00 | Tmprss4 | 0,95 | No  |
| ENSMUSG00000032092 | -1,66E+00 | 1,963794455  | 1,17E+02  | 2,25E-27 | 1,01E-24 | Mpzl2   | 0,32 | Yes |
| ENSMUSG00000032093 | -3,65E-01 | -2,800993776 | 9,79E-02  | 7,54E-01 | 9,34E-01 | Cd3e    | 0,78 | No  |
| ENSMUSG00000032094 | -1,69E+00 | -2,107523357 | 5,50E+00  | 1,90E-02 | 1,46E-01 | Cd3d    | 0,31 | No  |
| ENSMUSG00000032096 | -4,84E-02 | 7,799548919  | 6,83E-01  | 4,09E-01 | 7,05E-01 | Arcn1   | 0,97 | No  |
| ENSMUSG00000032097 | -7,56E-02 | 8,531892348  | 1,74E+00  | 1,88E-01 | 5,50E-01 | Ddx6    | 0,95 | No  |
| ENSMUSG00000032098 | 3,06E-01  | -2,548195936 | 9,54E-02  | 7,57E-01 | 9,35E-01 | Treh    | 1,24 | No  |
| ENSMUSG00000032099 | 5,97E-03  | -3,1461183   | -3,40E-10 | 1,00E+00 | 1,00E+00 | Pate4   | 1,00 | No  |
| ENSMUSG00000032101 | -1,89E+00 | -3,1076441   | 1,42E+00  | 2,33E-01 | 5,50E-01 | Ddx25   | 0,27 | No  |
| ENSMUSG00000032103 | -2,07E-02 | 2,13083179   | 2,14E-02  | 8,84E-01 | 1,00E+00 | Pus3    | 0,99 | No  |
| ENSMUSG00000032105 | -1,15E-01 | -0,561123751 | 1,03E-01  | 7,48E-01 | 9,30E-01 | Pdzd3   | 0,92 | No  |
| ENSMUSG00000032109 | 1,90E-01  | 5,458568102  | 7,50E+00  | 6,17E-03 | 6,56E-02 | Nlr1    | 1,14 | No  |
| ENSMUSG00000032110 | 2,25E+00  | -2,998050941 | 1,94E+00  | 1,64E-01 | 5,15E-01 | Acrv1   | 4,74 | No  |
| ENSMUSG00000032112 | -1,11E-02 | 5,447032054  | 2,56E-02  | 8,73E-01 | 1,00E+00 | Trappc4 | 0,99 | No  |
| ENSMUSG00000032113 | -9,33E-03 | 2,951601893  | 6,61E-03  | 9,35E-01 | 1,00E+00 | Chek1   | 0,99 | No  |
| ENSMUSG00000032114 | 1,23E-01  | 4,576526451  | 2,41E+00  | 1,21E-01 | 4,33E-01 | Slc37a4 | 1,09 | No  |
| ENSMUSG00000032115 | 1,25E-01  | 7,412134388  | 4,39E+00  | 3,62E-02 | 2,26E-01 | Hyou1   | 1,09 | No  |
| ENSMUSG00000032116 | 1,19E-01  | 7,421955456  | 3,98E+00  | 4,60E-02 | 2,56E-01 | Stt3a   | 1,09 | No  |
| ENSMUSG00000032118 | 1,87E+00  | -3,03364371  | 1,36E+00  | 2,43E-01 | 5,50E-01 | Fez1    | 3,66 | No  |
| ENSMUSG00000032119 | 3,16E-02  | 4,976237176  | 1,82E-01  | 6,70E-01 | 8,88E-01 | Hinfp   | 1,02 | No  |
| ENSMUSG00000032120 | 8,66E-02  | 6,078316044  | 1,76E+00  | 1,84E-01 | 5,48E-01 | C2cd2l  | 1,06 | No  |
| ENSMUSG00000032121 | 2,68E-01  | 2,001846007  | 3,20E+00  | 7,38E-02 | 3,45E-01 | Tmem218 | 1,20 | No  |
| ENSMUSG00000032122 | 2,42E-01  | 5,656761445  | 1,28E+01  | 3,54E-04 | 6,92E-03 | Slc37a2 | 1,18 | Yes |
| ENSMUSG00000032123 | 5,45E-02  | 5,73136991   | 6,56E-01  | 4,18E-01 | 7,13E-01 | Dpagt1  | 1,04 | No  |

|                    |           |              |          |          |          |         |      |     |
|--------------------|-----------|--------------|----------|----------|----------|---------|------|-----|
| ENSMUSG00000032125 | -1,53E+00 | -0,311106154 | 2,39E+01 | 1,01E-06 | 4,47E-05 | Robo4   | 0,35 | Yes |
| ENSMUSG00000032126 | 2,41E-01  | 3,638468094  | 6,33E+00 | 1,18E-02 | 1,06E-01 | Hmbs    | 1,18 | No  |
| ENSMUSG00000032127 | 1,73E-02  | 6,602757277  | 7,75E-02 | 7,81E-01 | 9,49E-01 | Vps11   | 1,01 | No  |
| ENSMUSG00000032128 | -3,77E-01 | -0,816353095 | 8,42E-01 | 3,59E-01 | 6,60E-01 | Robo3   | 0,77 | No  |
| ENSMUSG00000032131 | -8,79E-01 | 1,542771346  | 2,49E+01 | 5,95E-07 | 2,78E-05 | Abcg4   | 0,54 | Yes |
| ENSMUSG00000032135 | -3,82E-01 | 0,33789686   | 2,14E+00 | 1,44E-01 | 4,79E-01 | Mcam    | 0,77 | No  |
| ENSMUSG00000032171 | -1,15E-02 | 5,078490943  | 2,45E-02 | 8,76E-01 | 1,00E+00 | Pin1    | 0,99 | No  |
| ENSMUSG00000032172 | 8,67E-01  | -1,896237312 | 1,41E+00 | 2,36E-01 | 5,50E-01 | Olfm2   | 1,82 | No  |
| ENSMUSG00000032174 | -5,49E-01 | -0,503825688 | 2,36E+00 | 1,25E-01 | 4,42E-01 | Icam5   | 0,68 | No  |
| ENSMUSG00000032175 | -7,10E-02 | 7,948275947  | 1,49E+00 | 2,22E-01 | 5,50E-01 | Tyk2    | 0,95 | No  |
| ENSMUSG00000032177 | 1,61E-01  | 4,265940886  | 3,69E+00 | 5,47E-02 | 2,86E-01 | Pde4a   | 1,12 | No  |
| ENSMUSG00000032178 | 3,90E-02  | 5,91908171   | 3,50E-01 | 5,54E-01 | 8,20E-01 | Ilf3    | 1,03 | No  |
| ENSMUSG00000032179 | -1,23E+00 | -3,146117124 | 7,12E-01 | 3,99E-01 | 6,98E-01 | Bmp5    | 0,42 | No  |
| ENSMUSG00000032180 | 1,49E-01  | 2,667961477  | 1,44E+00 | 2,30E-01 | 5,50E-01 | Tmed1   | 1,11 | No  |
| ENSMUSG00000032181 | 1,85E+00  | -3,107657832 | 1,35E+00 | 2,46E-01 | 5,50E-01 | Scg3    | 3,61 | No  |
| ENSMUSG00000032182 | 1,05E-02  | 4,135809324  | 1,48E-02 | 9,03E-01 | 1,00E+00 | Yipf2   | 1,01 | No  |
| ENSMUSG00000032184 | -7,42E-01 | 0,386080287  | 8,97E+00 | 2,75E-03 | 3,58E-02 | Lysmd2  | 0,60 | Yes |
| ENSMUSG00000032185 | -8,78E-02 | 5,240581386  | 1,51E+00 | 2,19E-01 | 5,50E-01 | Carm1   | 0,94 | No  |
| ENSMUSG00000032186 | -8,87E-01 | 3,344029875  | 7,64E+01 | 2,34E-18 | 4,71E-16 | Tmod2   | 0,54 | Yes |
| ENSMUSG00000032187 | 5,92E-02  | 7,593117635  | 1,01E+00 | 3,16E-01 | 6,16E-01 | Smarca4 | 1,04 | No  |
| ENSMUSG00000032191 | 1,87E+00  | -3,107639691 | 1,38E+00 | 2,40E-01 | 5,50E-01 | Bcl2l10 | 3,67 | No  |
| ENSMUSG00000032192 | 4,02E-02  | 1,899156414  | 6,62E-02 | 7,97E-01 | 9,58E-01 | Gnb5    | 1,03 | No  |
| ENSMUSG00000032193 | 2,23E-01  | 7,863841562  | 1,46E+01 | 1,34E-04 | 3,09E-03 | Ldlr    | 1,17 | Yes |
| ENSMUSG00000032194 | -1,59E-01 | 1,966581079  | 1,08E+00 | 2,98E-01 | 5,94E-01 | Kank2   | 0,90 | No  |
| ENSMUSG00000032198 | -2,70E-01 | 3,07029378   | 5,94E+00 | 1,48E-02 | 1,25E-01 | Dock6   | 0,83 | No  |
| ENSMUSG00000032199 | -2,57E-02 | 6,795301634  | 1,75E-01 | 6,75E-01 | 8,91E-01 | Polr2m  | 0,98 | No  |
| ENSMUSG00000032202 | -5,10E-01 | 4,678507235  | 4,33E+01 | 4,59E-11 | 4,53E-09 | Rab27a  | 0,70 | Yes |
| ENSMUSG00000032204 | -1,68E-01 | 5,58329822   | 6,13E+00 | 1,33E-02 | 1,15E-01 | Aqp9    | 0,89 | No  |
| ENSMUSG00000032207 | -2,35E-01 | -2,226386544 | 1,08E-01 | 7,42E-01 | 9,27E-01 | Lipc    | 0,85 | No  |
| ENSMUSG00000032212 | -2,69E-02 | 6,239683075  | 1,78E-01 | 6,73E-01 | 8,90E-01 | Sltm    | 0,98 | No  |
| ENSMUSG00000032215 | 8,56E-02  | 4,711691182  | 1,22E+00 | 2,69E-01 | 5,66E-01 | Rsl24d1 | 1,06 | No  |
| ENSMUSG00000032216 | -3,34E-01 | 6,792300644  | 2,99E+01 | 4,65E-08 | 2,80E-06 | Nedd4   | 0,79 | Yes |

|                    |           |              |           |          |          |          |      |     |
|--------------------|-----------|--------------|-----------|----------|----------|----------|------|-----|
| ENSMUSG00000032217 | 8,74E-02  | 6,141898588  | 1,84E+00  | 1,75E-01 | 5,33E-01 | Rnf111   | 1,06 | No  |
| ENSMUSG00000032218 | 1,31E-01  | 5,349976531  | 3,48E+00  | 6,21E-02 | 3,10E-01 | Ccnb2    | 1,10 | No  |
| ENSMUSG00000032220 | 3,62E-01  | 7,125588535  | 3,58E+01  | 2,21E-09 | 1,69E-07 | Myo1e    | 1,29 | Yes |
| ENSMUSG00000032221 | 2,17E-01  | 2,817375612  | 3,29E+00  | 6,96E-02 | 3,32E-01 | Mns1     | 1,16 | No  |
| ENSMUSG00000032224 | -3,83E-02 | -3,107651936 | -7,91E-11 | 1,00E+00 | 1,00E+00 | Fam81a   | 0,97 | No  |
| ENSMUSG00000032228 | 4,50E-04  | 6,071848906  | 4,76E-05  | 9,94E-01 | 1,00E+00 | Tcf12    | 1,00 | No  |
| ENSMUSG00000032231 | 1,25E-01  | 8,43150978   | 4,70E+00  | 3,01E-02 | 1,99E-01 | Anxa2    | 1,09 | No  |
| ENSMUSG00000032232 | 2,45E-01  | 7,542094572  | 1,72E+01  | 3,44E-05 | 9,86E-04 | Cgnl1    | 1,19 | Yes |
| ENSMUSG00000032235 | 5,29E-02  | 3,60732743   | 3,08E-01  | 5,79E-01 | 8,36E-01 | Ice2     | 1,04 | No  |
| ENSMUSG00000032238 | 4,18E-02  | 4,298730595  | 2,50E-01  | 6,17E-01 | 8,55E-01 | Rora     | 1,03 | No  |
| ENSMUSG00000032239 | -8,11E-02 | 5,070023933  | 1,23E+00  | 2,68E-01 | 5,65E-01 | Rp9      | 0,95 | No  |
| ENSMUSG00000032243 | -7,19E-01 | -2,548196401 | 5,79E-01  | 4,47E-01 | 7,37E-01 | Itga11   | 0,61 | No  |
| ENSMUSG00000032244 | 1,87E-02  | 5,501080501  | 7,40E-02  | 7,86E-01 | 9,52E-01 | Fem1b    | 1,01 | No  |
| ENSMUSG00000032245 | 2,00E-01  | 5,266697922  | 7,82E+00  | 5,17E-03 | 5,73E-02 | Cln6     | 1,15 | No  |
| ENSMUSG00000032246 | 2,78E-01  | -1,801010129 | 1,60E-01  | 6,89E-01 | 8,99E-01 | Calml4   | 1,21 | No  |
| ENSMUSG00000032249 | -2,12E-02 | 5,783900731  | 1,00E-01  | 7,51E-01 | 9,32E-01 | Anp32a   | 0,99 | No  |
| ENSMUSG00000032251 | -1,69E-03 | 1,309471157  | 8,34E-05  | 9,93E-01 | 1,00E+00 | Irak1bp1 | 1,00 | No  |
| ENSMUSG00000032252 | 6,77E-02  | 4,725043235  | 7,71E-01  | 3,80E-01 | 6,81E-01 | Glce     | 1,05 | No  |
| ENSMUSG00000032253 | -9,49E-02 | 7,048825882  | 2,46E+00  | 1,17E-01 | 4,23E-01 | Phip     | 0,94 | No  |
| ENSMUSG00000032254 | 1,81E-01  | 5,668097145  | 7,10E+00  | 7,69E-03 | 7,68E-02 | Kif23    | 1,13 | No  |
| ENSMUSG00000032258 | 3,41E-01  | 1,723338375  | 4,47E+00  | 3,46E-02 | 2,19E-01 | Lca5     | 1,27 | No  |
| ENSMUSG00000032261 | 4,66E-01  | 3,857135393  | 2,50E+01  | 5,86E-07 | 2,75E-05 | Sh3bgrl2 | 1,38 | Yes |
| ENSMUSG00000032262 | -1,99E+00 | -2,65512892  | 2,99E+00  | 8,39E-02 | 3,71E-01 | Elovl4   | 0,25 | No  |
| ENSMUSG00000032263 | -2,09E-02 | 1,79148362   | 1,63E-02  | 8,99E-01 | 1,00E+00 | Bckdhh   | 0,99 | No  |
| ENSMUSG00000032264 | -1,50E-01 | 5,450814621  | 4,70E+00  | 3,02E-02 | 1,99E-01 | Zw10     | 0,90 | No  |
| ENSMUSG00000032265 | -2,54E-01 | 6,273024697  | 1,58E+01  | 7,08E-05 | 1,82E-03 | Fam46a   | 0,84 | Yes |
| ENSMUSG00000032267 | 2,11E-02  | 4,315416184  | 6,41E-02  | 8,00E-01 | 9,60E-01 | Usp28    | 1,01 | No  |
| ENSMUSG00000032268 | -5,23E-02 | -2,963273906 | 1,24E-03  | 9,72E-01 | 1,00E+00 | Tmprss5  | 0,96 | No  |
| ENSMUSG00000032271 | -1,94E-01 | -1,600649005 | 1,09E-01  | 7,41E-01 | 9,27E-01 | Nnmt     | 0,87 | No  |
| ENSMUSG00000032274 | 1,86E+00  | -3,033661846 | 1,35E+00  | 2,46E-01 | 5,50E-01 | Cyp19a1  | 3,62 | No  |
| ENSMUSG00000032278 | 6,28E-01  | -2,033644301 | 8,00E-01  | 3,71E-01 | 6,72E-01 | Paqr5    | 1,55 | No  |
| ENSMUSG00000032279 | 8,20E-02  | 6,071790967  | 1,59E+00  | 2,08E-01 | 5,50E-01 | Idh3a    | 1,06 | No  |

|                    |           |              |          |          |          |               |      |     |
|--------------------|-----------|--------------|----------|----------|----------|---------------|------|-----|
| ENSMUSG00000032280 | -4,64E-02 | 7,237671253  | 6,00E-01 | 4,39E-01 | 7,31E-01 | Tle3          | 0,97 | No  |
| ENSMUSG00000032281 | 5,93E-01  | 0,81428553   | 6,77E+00 | 9,29E-03 | 8,84E-02 | Acsbg1        | 1,51 | No  |
| ENSMUSG00000032285 | -6,30E-01 | 1,71780932   | 1,48E+01 | 1,20E-04 | 2,83E-03 | Dnaja4        | 0,65 | Yes |
| ENSMUSG00000032288 | 4,45E-02  | 5,25940433   | 3,89E-01 | 5,33E-01 | 8,06E-01 | Imp3          | 1,03 | No  |
| ENSMUSG00000032289 | 1,42E-01  | -2,401387661 | 2,96E-02 | 8,63E-01 | 9,97E-01 | Thsd4         | 1,10 | No  |
| ENSMUSG00000032290 | -1,34E-01 | 7,105268211  | 4,98E+00 | 2,56E-02 | 1,78E-01 | Ptpn9         | 0,91 | No  |
| ENSMUSG00000032292 | 1,83E+00  | -2,963282593 | 1,33E+00 | 2,50E-01 | 5,50E-01 | Nr2e3         | 3,56 | No  |
| ENSMUSG00000032293 | 1,22E-01  | 6,368850517  | 3,69E+00 | 5,46E-02 | 2,86E-01 | Ireb2         | 1,09 | No  |
| ENSMUSG00000032294 | 1,69E-01  | 9,71684688   | 8,98E+00 | 2,73E-03 | 3,56E-02 | Pkm           | 1,12 | Yes |
| ENSMUSG00000032295 | 2,49E-02  | 5,986589389  | 1,45E-01 | 7,03E-01 | 9,06E-01 | Man2c1        | 1,02 | No  |
| ENSMUSG00000032297 | -9,05E-02 | -1,832040213 | 2,30E-02 | 8,79E-01 | 1,00E+00 | Celf6         | 0,94 | No  |
| ENSMUSG00000032298 | -5,77E-02 | 3,346604867  | 3,17E-01 | 5,74E-01 | 8,33E-01 | Neil1         | 0,96 | No  |
| ENSMUSG00000032299 | -3,59E-02 | 5,259144644  | 2,52E-01 | 6,15E-01 | 8,54E-01 | Commd4        | 0,98 | No  |
| ENSMUSG00000032300 | 1,67E-01  | 5,653283686  | 5,99E+00 | 1,44E-02 | 1,22E-01 | 1700017B05Rik | 1,12 | No  |
| ENSMUSG00000032301 | -4,82E-02 | 5,663069268  | 5,06E-01 | 4,77E-01 | 7,65E-01 | Psma4         | 0,97 | No  |
| ENSMUSG00000032303 | 1,81E+00  | -3,10765737  | 1,28E+00 | 2,58E-01 | 5,50E-01 | Chrna3        | 3,49 | No  |
| ENSMUSG00000032305 | 1,40E-01  | 4,42086932   | 3,01E+00 | 8,29E-02 | 3,70E-01 | Fam219b       | 1,10 | No  |
| ENSMUSG00000032306 | -2,78E-01 | 4,931722076  | 1,41E+01 | 1,72E-04 | 3,83E-03 | Mpi           | 0,82 | Yes |
| ENSMUSG00000032307 | 7,13E-02  | 4,899630427  | 9,00E-01 | 3,43E-01 | 6,43E-01 | Ube2q2        | 1,05 | No  |
| ENSMUSG00000032308 | 1,50E-01  | 4,394956157  | 3,36E+00 | 6,66E-02 | 3,25E-01 | Ulk3          | 1,11 | No  |
| ENSMUSG00000032309 | 1,33E-01  | 5,467049756  | 3,65E+00 | 5,59E-02 | 2,90E-01 | Fbxo22        | 1,10 | No  |
| ENSMUSG00000032311 | 1,88E-01  | 3,31329405   | 3,20E+00 | 7,37E-02 | 3,45E-01 | Nrg4          | 1,14 | No  |
| ENSMUSG00000032312 | 1,21E-01  | 7,634342973  | 4,24E+00 | 3,96E-02 | 2,36E-01 | Csk           | 1,09 | No  |
| ENSMUSG00000032313 | -2,25E-01 | -1,226188776 | 2,14E-01 | 6,44E-01 | 8,72E-01 | Tmem266       | 0,86 | No  |
| ENSMUSG00000032314 | -3,66E-02 | 4,383651512  | 2,01E-01 | 6,54E-01 | 8,79E-01 | Etfa          | 0,97 | No  |
| ENSMUSG00000032315 | -3,39E+00 | -1,205629843 | 3,91E+01 | 3,95E-10 | 3,45E-08 | Cyp1a1        | 0,10 | Yes |
| ENSMUSG00000032316 | -7,16E-02 | 6,294832652  | 1,26E+00 | 2,62E-01 | 5,55E-01 | Clk3          | 0,95 | No  |
| ENSMUSG00000032318 | -8,97E-01 | -2,711689245 | 4,38E-01 | 5,08E-01 | 7,92E-01 | Isl2          | 0,54 | No  |
| ENSMUSG00000032320 | 1,11E-01  | 5,046568962  | 2,25E+00 | 1,33E-01 | 4,60E-01 | Rcn2          | 1,08 | No  |
| ENSMUSG00000032322 | -7,10E-03 | 5,512884493  | 1,05E-02 | 9,18E-01 | 1,00E+00 | Pstpip1       | 1,00 | No  |
| ENSMUSG00000032323 | -7,90E-01 | -0,316546156 | 5,01E+00 | 2,51E-02 | 1,75E-01 | Cyp11a1       | 0,58 | No  |
| ENSMUSG00000032324 | -1,31E-01 | 7,036046149  | 4,71E+00 | 3,00E-02 | 1,99E-01 | Tspan3        | 0,91 | No  |

|                    |           |              |           |          |          |         |      |     |
|--------------------|-----------|--------------|-----------|----------|----------|---------|------|-----|
| ENSMUSG00000032327 | -1,35E+00 | -2,711637134 | 1,13E+00  | 2,87E-01 | 5,83E-01 | Stra6   | 0,39 | No  |
| ENSMUSG00000032328 | 8,74E-02  | 7,690879774  | 2,21E+00  | 1,37E-01 | 4,67E-01 | Tmem30a | 1,06 | No  |
| ENSMUSG00000032329 | 2,13E-02  | 5,015237732  | 8,49E-02  | 7,71E-01 | 9,42E-01 | Hmg20a  | 1,01 | No  |
| ENSMUSG00000032330 | -1,24E-01 | 5,454690433  | 3,18E+00  | 7,45E-02 | 3,47E-01 | Cox7a2  | 0,92 | No  |
| ENSMUSG00000032332 | -1,10E+00 | -0,895788652 | 6,40E+00  | 1,14E-02 | 1,03E-01 | Col12a1 | 0,47 | No  |
| ENSMUSG00000032333 | -3,22E-01 | 4,428781044  | 1,62E+01  | 5,84E-05 | 1,55E-03 | Stoml1  | 0,80 | Yes |
| ENSMUSG00000032334 | -1,17E+00 | -2,069990812 | 2,24E+00  | 1,34E-01 | 4,61E-01 | Loxl1   | 0,44 | No  |
| ENSMUSG00000032336 | 1,73E-01  | 7,918796974  | 8,79E+00  | 3,02E-03 | 3,85E-02 | Nptn    | 1,13 | Yes |
| ENSMUSG00000032338 | 1,85E+00  | -3,107657832 | 1,35E+00  | 2,46E-01 | 5,50E-01 | Hcn4    | 3,61 | No  |
| ENSMUSG00000032340 | -7,17E-02 | 0,737208369  | 9,62E-02  | 7,56E-01 | 9,35E-01 | Neo1    | 0,95 | No  |
| ENSMUSG00000032342 | 1,45E-01  | 4,021912284  | 2,67E+00  | 1,02E-01 | 3,95E-01 | Mto1    | 1,11 | No  |
| ENSMUSG00000032343 | 1,87E+00  | -3,107639691 | 1,38E+00  | 2,40E-01 | 5,50E-01 | Impg1   | 3,67 | No  |
| ENSMUSG00000032344 | 1,40E-01  | 4,547358806  | 3,09E+00  | 7,86E-02 | 3,58E-01 | Mb21d1  | 1,10 | No  |
| ENSMUSG00000032348 | -1,25E+00 | -2,548191348 | 1,51E+00  | 2,19E-01 | 5,50E-01 | Gsta4   | 0,42 | No  |
| ENSMUSG00000032349 | 1,19E-01  | 7,722802873  | 4,13E+00  | 4,22E-02 | 2,44E-01 | Elov15  | 1,09 | No  |
| ENSMUSG00000032350 | -4,55E-02 | 5,529001758  | 4,35E-01  | 5,09E-01 | 7,93E-01 | Gclc    | 0,97 | No  |
| ENSMUSG00000032352 | 1,79E-01  | 3,02467085   | 2,60E+00  | 1,07E-01 | 4,00E-01 | Lrrc1   | 1,13 | No  |
| ENSMUSG00000032353 | 1,19E-01  | 5,860457244  | 3,20E+00  | 7,36E-02 | 3,45E-01 | Tmed3   | 1,09 | No  |
| ENSMUSG00000032355 | -3,83E-02 | -3,107651936 | -7,91E-11 | 1,00E+00 | 1,00E+00 | Mlip    | 0,97 | No  |
| ENSMUSG00000032356 | 7,51E-02  | -1,165692585 | 2,50E-02  | 8,74E-01 | 1,00E+00 | Rasgrf1 | 1,05 | No  |
| ENSMUSG00000032359 | -1,06E-01 | 8,186743345  | 3,35E+00  | 6,71E-02 | 3,26E-01 | Ctsh    | 0,93 | No  |
| ENSMUSG00000032363 | -5,56E-01 | 2,039875231  | 1,43E+01  | 1,55E-04 | 3,50E-03 | Adamts7 | 0,68 | Yes |
| ENSMUSG00000032366 | -1,21E-01 | 5,606926764  | 3,17E+00  | 7,51E-02 | 3,49E-01 | Tpm1    | 0,92 | No  |
| ENSMUSG00000032369 | -3,15E-01 | 4,481813325  | 1,52E+01  | 9,84E-05 | 2,39E-03 | Plscr1  | 0,80 | Yes |
| ENSMUSG00000032370 | -5,32E-02 | 6,033486753  | 6,68E-01  | 4,14E-01 | 7,09E-01 | Lactb   | 0,96 | No  |
| ENSMUSG00000032372 | -1,96E+00 | -2,896145386 | 1,50E+00  | 2,21E-01 | 5,50E-01 | Plscr2  | 0,26 | No  |
| ENSMUSG00000032373 | 3,39E-01  | -1,146130244 | 5,85E-01  | 4,44E-01 | 7,36E-01 | Car12   | 1,26 | No  |
| ENSMUSG00000032374 | -8,48E-01 | 0,66685642   | 1,49E+01  | 1,16E-04 | 2,75E-03 | Plod2   | 0,56 | Yes |
| ENSMUSG00000032375 | 1,37E-01  | 4,920151335  | 3,32E+00  | 6,84E-02 | 3,29E-01 | Aph1b   | 1,10 | No  |
| ENSMUSG00000032376 | -2,09E-01 | 5,675909012  | 9,64E+00  | 1,90E-03 | 2,69E-02 | Usp3    | 0,86 | Yes |
| ENSMUSG00000032377 | 2,91E-02  | 2,258498691  | 4,33E-02  | 8,35E-01 | 9,80E-01 | Plscr4  | 1,02 | No  |
| ENSMUSG00000032380 | 2,08E-02  | 1,904415238  | 1,77E-02  | 8,94E-01 | 1,00E+00 | Dapk2   | 1,01 | No  |

|                    |           |              |          |          |          |               |      |     |
|--------------------|-----------|--------------|----------|----------|----------|---------------|------|-----|
| ENSMUSG00000032381 | 4,42E-02  | 6,905574346  | 5,23E-01 | 4,69E-01 | 7,58E-01 | Fam96a        | 1,03 | No  |
| ENSMUSG00000032382 | 1,83E-01  | 6,91955684   | 8,97E+00 | 2,75E-03 | 3,58E-02 | Snx1          | 1,13 | Yes |
| ENSMUSG00000032383 | 3,20E-02  | 7,268444756  | 2,86E-01 | 5,93E-01 | 8,42E-01 | Ppib          | 1,02 | No  |
| ENSMUSG00000032384 | -7,10E-02 | 5,852190875  | 1,15E+00 | 2,83E-01 | 5,79E-01 | Csnk1g1       | 0,95 | No  |
| ENSMUSG00000032386 | -2,10E-02 | 5,269544438  | 8,76E-02 | 7,67E-01 | 9,40E-01 | Trip4         | 0,99 | No  |
| ENSMUSG00000032387 | -1,23E+00 | 0,054287361  | 1,65E+01 | 4,87E-05 | 1,33E-03 | Rbpms2        | 0,43 | Yes |
| ENSMUSG00000032388 | -6,90E-04 | 6,631394659  | 1,23E-04 | 9,91E-01 | 1,00E+00 | Spg21         | 1,00 | No  |
| ENSMUSG00000032392 | 2,10E-02  | 2,28954699   | 2,39E-02 | 8,77E-01 | 1,00E+00 | Parp16        | 1,01 | No  |
| ENSMUSG00000032393 | 9,30E-02  | 7,106431104  | 2,38E+00 | 1,23E-01 | 4,39E-01 | Dpp8          | 1,07 | No  |
| ENSMUSG00000032396 | 3,02E-03  | 4,58072572   | 1,46E-03 | 9,69E-01 | 1,00E+00 | Dis3l         | 1,00 | No  |
| ENSMUSG00000032397 | -4,58E-03 | 4,148408707  | 2,86E-03 | 9,57E-01 | 1,00E+00 | Tipin         | 1,00 | No  |
| ENSMUSG00000032398 | -1,33E-01 | 4,05884735   | 2,34E+00 | 1,26E-01 | 4,44E-01 | Snapc5        | 0,91 | No  |
| ENSMUSG00000032399 | -1,37E-01 | 8,72067186   | 5,72E+00 | 1,67E-02 | 1,35E-01 | Rpl4          | 0,91 | No  |
| ENSMUSG00000032400 | 1,42E-01  | 4,031172206  | 2,60E+00 | 1,07E-01 | 3,99E-01 | Zwilch        | 1,10 | No  |
| ENSMUSG00000032401 | 4,14E-01  | 0,853595579  | 3,52E+00 | 6,05E-02 | 3,05E-01 | Lctl          | 1,33 | No  |
| ENSMUSG00000032402 | -3,47E-01 | 2,297756375  | 6,24E+00 | 1,25E-02 | 1,10E-01 | Smad3         | 0,79 | No  |
| ENSMUSG00000032403 | 1,20E-02  | 1,8306403    | 5,58E-03 | 9,40E-01 | 1,00E+00 | 2300009A05Rik | 1,01 | No  |
| ENSMUSG00000032405 | 3,06E-02  | 5,579831441  | 2,00E-01 | 6,55E-01 | 8,79E-01 | Pias1         | 1,02 | No  |
| ENSMUSG00000032407 | 4,52E-02  | 6,286393763  | 5,02E-01 | 4,78E-01 | 7,66E-01 | U2surp        | 1,03 | No  |
| ENSMUSG00000032409 | 9,34E-03  | 4,762193711  | 1,48E-02 | 9,03E-01 | 1,00E+00 | Atr           | 1,01 | No  |
| ENSMUSG00000032410 | 3,86E-02  | 6,040787864  | 3,51E-01 | 5,53E-01 | 8,19E-01 | Xrn1          | 1,03 | No  |
| ENSMUSG00000032411 | 8,35E-02  | 5,124072919  | 1,32E+00 | 2,50E-01 | 5,50E-01 | Tfdp2         | 1,06 | No  |
| ENSMUSG00000032412 | 3,73E-02  | 7,567908787  | 3,99E-01 | 5,28E-01 | 8,04E-01 | Atp1b3        | 1,03 | No  |
| ENSMUSG00000032413 | -2,92E-01 | 4,723612649  | 1,46E+01 | 1,33E-04 | 3,09E-03 | Rasa2         | 0,82 | Yes |
| ENSMUSG00000032415 | -4,28E-01 | 0,259519171  | 2,61E+00 | 1,07E-01 | 3,99E-01 | Ube2cbp       | 0,74 | No  |
| ENSMUSG00000032417 | -4,46E-03 | 1,745393996  | 7,60E-04 | 9,78E-01 | 1,00E+00 | Rwdd2a        | 1,00 | No  |
| ENSMUSG00000032418 | 6,83E-02  | 1,117597316  | 1,13E-01 | 7,37E-01 | 9,25E-01 | Me1           | 1,05 | No  |
| ENSMUSG00000032419 | 2,31E+00  | -2,929290301 | 2,04E+00 | 1,54E-01 | 4,97E-01 | Tbx18         | 4,97 | No  |
| ENSMUSG00000032420 | -1,20E-01 | 2,346322025  | 7,77E-01 | 3,78E-01 | 6,79E-01 | Nt5e          | 0,92 | No  |
| ENSMUSG00000032422 | 1,55E-02  | 4,770509724  | 4,07E-02 | 8,40E-01 | 9,83E-01 | Snx14         | 1,01 | No  |
| ENSMUSG00000032423 | 7,28E-02  | 6,791729939  | 1,40E+00 | 2,37E-01 | 5,50E-01 | Syncrip       | 1,05 | No  |
| ENSMUSG00000032425 | -1,71E-01 | 3,252555256  | 2,71E+00 | 9,97E-02 | 3,92E-01 | Zfp949        | 0,89 | No  |

|                    |           |              |           |          |          |          |      |     |
|--------------------|-----------|--------------|-----------|----------|----------|----------|------|-----|
| ENSMUSG00000032431 | 1,35E-01  | 5,355539471  | 3,66E+00  | 5,58E-02 | 2,90E-01 | Crtap    | 1,10 | No  |
| ENSMUSG00000032434 | -1,63E-01 | 8,957709718  | 8,15E+00  | 4,30E-03 | 4,99E-02 | Cmtm6    | 0,89 | Yes |
| ENSMUSG00000032435 | -2,00E-01 | 6,445798165  | 1,01E+01  | 1,49E-03 | 2,23E-02 | Dync1li1 | 0,87 | Yes |
| ENSMUSG00000032436 | -1,52E-02 | 6,453104809  | 5,84E-02  | 8,09E-01 | 9,65E-01 | Cmtm7    | 0,99 | No  |
| ENSMUSG00000032437 | 1,17E-01  | 7,476136033  | 3,90E+00  | 4,82E-02 | 2,64E-01 | Stt3b    | 1,08 | No  |
| ENSMUSG00000032440 | 1,44E-01  | 7,67537817   | 5,99E+00  | 1,44E-02 | 1,22E-01 | Tgfbr2   | 1,11 | No  |
| ENSMUSG00000032443 | -2,50E+00 | -2,355487253 | 5,42E+00  | 1,99E-02 | 1,51E-01 | Zcwpw2   | 0,18 | No  |
| ENSMUSG00000032446 | -1,94E+00 | -3,107619243 | 1,50E+00  | 2,21E-01 | 5,50E-01 | Eomes    | 0,26 | No  |
| ENSMUSG00000032449 | 7,74E-02  | 6,014043531  | 1,41E+00  | 2,34E-01 | 5,50E-01 | Slc25a36 | 1,06 | No  |
| ENSMUSG00000032452 | 4,24E-02  | -3,033592245 | -1,17E-09 | 1,00E+00 | 1,00E+00 | Clstn2   | 1,03 | No  |
| ENSMUSG00000032454 | 3,14E-02  | -3,107617333 | -7,69E-10 | 1,00E+00 | 1,00E+00 | Rbp2     | 1,02 | No  |
| ENSMUSG00000032456 | -1,21E-01 | 3,687531086  | 1,66E+00  | 1,98E-01 | 5,50E-01 | Nmnat3   | 0,92 | No  |
| ENSMUSG00000032458 | 5,18E-04  | 6,971125759  | 7,24E-05  | 9,93E-01 | 1,00E+00 | Copb2    | 1,00 | No  |
| ENSMUSG00000032459 | -4,28E-02 | 3,202722581  | 1,60E-01  | 6,89E-01 | 8,99E-01 | Mrps22   | 0,97 | No  |
| ENSMUSG00000032462 | 3,65E-02  | 6,16532958   | 3,21E-01  | 5,71E-01 | 8,32E-01 | Pik3cb   | 1,03 | No  |
| ENSMUSG00000032463 | -4,15E-02 | 4,740185105  | 2,88E-01  | 5,91E-01 | 8,42E-01 | Faim     | 0,97 | No  |
| ENSMUSG00000032468 | 6,70E-02  | 4,730594021  | 7,56E-01  | 3,85E-01 | 6,86E-01 | Armc8    | 1,05 | No  |
| ENSMUSG00000032469 | 1,08E-02  | 4,59642621   | 1,88E-02  | 8,91E-01 | 1,00E+00 | Dbr1     | 1,01 | No  |
| ENSMUSG00000032470 | 3,98E-01  | 6,002217571  | 3,64E+01  | 1,57E-09 | 1,25E-07 | Mras     | 1,32 | Yes |
| ENSMUSG00000032475 | 1,23E-01  | 5,318418037  | 3,07E+00  | 7,98E-02 | 3,61E-01 | Nck1     | 1,09 | No  |
| ENSMUSG00000032477 | 2,13E-01  | 4,613720537  | 7,38E+00  | 6,60E-03 | 6,88E-02 | Cdc25a   | 1,16 | No  |
| ENSMUSG00000032478 | 4,67E-02  | 2,699378354  | 1,46E-01  | 7,03E-01 | 9,06E-01 | Nme6     | 1,03 | No  |
| ENSMUSG00000032479 | -6,13E-02 | 8,251030684  | 1,13E+00  | 2,88E-01 | 5,84E-01 | Map4     | 0,96 | No  |
| ENSMUSG00000032480 | 5,80E-02  | 5,553746629  | 7,16E-01  | 3,98E-01 | 6,98E-01 | Dhx30    | 1,04 | No  |
| ENSMUSG00000032481 | 1,02E-01  | 5,949523041  | 2,37E+00  | 1,24E-01 | 4,40E-01 | Smarcc1  | 1,07 | No  |
| ENSMUSG00000032482 | 3,93E-01  | -2,10765596  | 2,47E-01  | 6,19E-01 | 8,56E-01 | Cspg5    | 1,31 | No  |
| ENSMUSG00000032484 | -3,79E-01 | -0,236726687 | 1,52E+00  | 2,18E-01 | 5,50E-01 | Ngp      | 0,77 | No  |
| ENSMUSG00000032485 | 9,00E-02  | 5,891984405  | 1,85E+00  | 1,74E-01 | 5,32E-01 | Scap     | 1,06 | No  |
| ENSMUSG00000032487 | -3,36E-01 | 3,083271953  | 9,17E+00  | 2,45E-03 | 3,29E-02 | Ptgs2    | 0,79 | Yes |
| ENSMUSG00000032489 | 1,29E-01  | 1,535995999  | 5,27E-01  | 4,68E-01 | 7,56E-01 | Kif9     | 1,09 | No  |
| ENSMUSG00000032491 | 7,78E-02  | 1,868310104  | 2,58E-01  | 6,11E-01 | 8,52E-01 | Nradd    | 1,06 | No  |
| ENSMUSG00000032492 | -1,19E+00 | -2,226164644 | 1,82E+00  | 1,77E-01 | 5,37E-01 | Pth1r    | 0,44 | No  |



|                    |           |              |           |          |          |          |      |     |
|--------------------|-----------|--------------|-----------|----------|----------|----------|------|-----|
| ENSMUSG00000032493 | 9,01E-03  | -3,107646452 | -5,16E-10 | 1,00E+00 | 1,00E+00 | Prss44   | 1,01 | No  |
| ENSMUSG00000032495 | 2,67E+00  | -3,033636951 | 2,76E+00  | 9,68E-02 | 3,88E-01 | Lrrc2    | 6,36 | No  |
| ENSMUSG00000032496 | 1,89E-01  | 0,167674713  | 5,25E-01  | 4,69E-01 | 7,57E-01 | Ltf      | 1,14 | No  |
| ENSMUSG00000032497 | 7,71E-02  | 6,554347172  | 1,51E+00  | 2,18E-01 | 5,50E-01 | Lrrfip2  | 1,05 | No  |
| ENSMUSG00000032498 | 1,09E-01  | 3,993663623  | 1,50E+00  | 2,21E-01 | 5,50E-01 | Mlh1     | 1,08 | No  |
| ENSMUSG00000032500 | 3,73E-01  | 0,632975521  | 2,56E+00  | 1,09E-01 | 4,06E-01 | Dclk3    | 1,30 | No  |
| ENSMUSG00000032501 | 6,24E-02  | 7,084732256  | 1,06E+00  | 3,03E-01 | 6,00E-01 | Trib1    | 1,04 | No  |
| ENSMUSG00000032502 | 2,27E+00  | -2,801010027 | 2,93E+00  | 8,69E-02 | 3,78E-01 | Stac     | 4,82 | No  |
| ENSMUSG00000032503 | -1,87E+00 | -3,107637761 | 1,39E+00  | 2,38E-01 | 5,50E-01 | Arpp21   | 0,27 | No  |
| ENSMUSG00000032504 | 9,03E-02  | 8,167983332  | 2,43E+00  | 1,19E-01 | 4,30E-01 | Pdcd6ip  | 1,06 | No  |
| ENSMUSG00000032507 | 2,36E-01  | 4,062256238  | 7,13E+00  | 7,56E-03 | 7,59E-02 | Fbxl2    | 1,18 | No  |
| ENSMUSG00000032508 | 6,27E-02  | 7,029132788  | 1,07E+00  | 3,01E-01 | 5,98E-01 | Myd88    | 1,04 | No  |
| ENSMUSG00000032511 | -1,98E+00 | -2,655099849 | 2,97E+00  | 8,47E-02 | 3,73E-01 | Scn5a    | 0,25 | No  |
| ENSMUSG00000032512 | -1,30E-01 | 5,589535508  | 3,64E+00  | 5,62E-02 | 2,91E-01 | Wdr48    | 0,91 | No  |
| ENSMUSG00000032513 | 3,28E-02  | 4,559615661  | 1,70E-01  | 6,80E-01 | 8,93E-01 | Gorasp1  | 1,02 | No  |
| ENSMUSG00000032514 | -8,39E-01 | 1,156223234  | 1,91E+01  | 1,25E-05 | 4,09E-04 | Ttc21a   | 0,56 | Yes |
| ENSMUSG00000032515 | 7,01E-02  | 6,290784326  | 1,21E+00  | 2,72E-01 | 5,68E-01 | Csrnp1   | 1,05 | No  |
| ENSMUSG00000032518 | -2,22E-01 | 8,250522308  | 1,47E+01  | 1,25E-04 | 2,92E-03 | Rpsa     | 0,86 | Yes |
| ENSMUSG00000032519 | -1,47E-01 | 5,492768895  | 4,55E+00  | 3,30E-02 | 2,13E-01 | Slc25a38 | 0,90 | No  |
| ENSMUSG00000032523 | -8,21E-01 | -2,963266074 | 3,67E-01  | 5,45E-01 | 8,13E-01 | Hhatl    | 0,57 | No  |
| ENSMUSG00000032525 | 1,23E-02  | 7,954181254  | 4,45E-02  | 8,33E-01 | 9,78E-01 | Nktr     | 1,01 | No  |
| ENSMUSG00000032526 | 2,72E-03  | 3,513726568  | 7,50E-04  | 9,78E-01 | 1,00E+00 | Ss18l2   | 1,00 | No  |
| ENSMUSG00000032527 | 4,16E-02  | 4,273366687  | 2,42E-01  | 6,23E-01 | 8,58E-01 | Pccb     | 1,03 | No  |
| ENSMUSG00000032528 | 8,02E-01  | 4,17228575   | 8,44E+01  | 4,13E-20 | 9,30E-18 | Vipr1    | 1,74 | Yes |
| ENSMUSG00000032530 | 1,46E-01  | 0,365606039  | 2,96E-01  | 5,87E-01 | 8,40E-01 | Lyzl4    | 1,11 | No  |
| ENSMUSG00000032531 | 1,20E+00  | -1,832046832 | 3,49E+00  | 6,18E-02 | 3,09E-01 | Amotl2   | 2,29 | No  |
| ENSMUSG00000032532 | -3,60E+00 | -0,388991256 | 7,87E+01  | 7,08E-19 | 1,48E-16 | Cck      | 0,08 | Yes |
| ENSMUSG00000032534 | 4,00E-02  | 4,000671667  | 2,04E-01  | 6,52E-01 | 8,77E-01 | Cep63    | 1,03 | No  |
| ENSMUSG00000032536 | 9,04E-03  | 6,814206994  | 2,16E-02  | 8,83E-01 | 1,00E+00 | Trak1    | 1,01 | No  |
| ENSMUSG00000032540 | 1,35E-01  | 5,840330472  | 4,12E+00  | 4,24E-02 | 2,45E-01 | Abhd5    | 1,10 | No  |
| ENSMUSG00000032547 | 4,13E-01  | 0,419211881  | 2,44E+00  | 1,18E-01 | 4,27E-01 | Ryk      | 1,33 | No  |
| ENSMUSG00000032548 | -3,72E-01 | -0,155716019 | 1,22E+00  | 2,70E-01 | 5,67E-01 | Slco2a1  | 0,77 | No  |

|                    |           |              |          |          |          |               |      |     |
|--------------------|-----------|--------------|----------|----------|----------|---------------|------|-----|
| ENSMUSG00000032549 | -3,30E-01 | 2,041404974  | 4,95E+00 | 2,62E-02 | 1,81E-01 | Rab6b         | 0,80 | No  |
| ENSMUSG00000032551 | 2,23E-02  | 4,156897385  | 6,65E-02 | 7,97E-01 | 9,58E-01 | 1110059G10Rik | 1,02 | No  |
| ENSMUSG00000032553 | 1,66E-01  | 5,061716611  | 5,08E+00 | 2,42E-02 | 1,71E-01 | Srprb         | 1,12 | No  |
| ENSMUSG00000032554 | -1,67E-02 | 6,49664011   | 7,03E-02 | 7,91E-01 | 9,55E-01 | Trf           | 0,99 | No  |
| ENSMUSG00000032555 | 9,00E-02  | 7,127958765  | 2,22E+00 | 1,36E-01 | 4,65E-01 | Topbp1        | 1,06 | No  |
| ENSMUSG00000032556 | 2,61E-02  | -1,136362713 | 3,37E-03 | 9,54E-01 | 1,00E+00 | Bfsp2         | 1,02 | No  |
| ENSMUSG00000032557 | 3,67E-02  | 5,366959865  | 2,72E-01 | 6,02E-01 | 8,48E-01 | Uba5          | 1,03 | No  |
| ENSMUSG00000032558 | 2,13E-01  | 3,14383909   | 3,82E+00 | 5,07E-02 | 2,73E-01 | Nphp3         | 1,16 | No  |
| ENSMUSG00000032560 | 4,80E-02  | 7,002085902  | 6,24E-01 | 4,30E-01 | 7,23E-01 | Dnajc13       | 1,03 | No  |
| ENSMUSG00000032561 | -3,29E-01 | 6,786633034  | 2,85E+01 | 9,61E-08 | 5,40E-06 | Acpp          | 0,80 | Yes |
| ENSMUSG00000032562 | -3,18E-03 | 9,98772272   | 3,21E-03 | 9,55E-01 | 1,00E+00 | Gnai2         | 1,00 | No  |
| ENSMUSG00000032563 | -3,21E-02 | 4,975854971  | 1,86E-01 | 6,67E-01 | 8,86E-01 | Mrpl3         | 0,98 | No  |
| ENSMUSG00000032565 | -4,34E-01 | 3,654965746  | 2,05E+01 | 5,87E-06 | 2,08E-04 | Nudt16        | 0,74 | Yes |
| ENSMUSG00000032567 | 2,01E-01  | 3,39755669   | 3,82E+00 | 5,07E-02 | 2,73E-01 | Aste1         | 1,15 | No  |
| ENSMUSG00000032570 | 1,10E-01  | 6,320727699  | 2,97E+00 | 8,47E-02 | 3,73E-01 | Atp2c1        | 1,08 | No  |
| ENSMUSG00000032571 | 1,40E-01  | 5,404519086  | 4,00E+00 | 4,56E-02 | 2,54E-01 | Pik3r4        | 1,10 | No  |
| ENSMUSG00000032572 | -8,37E-01 | -2,770504191 | 3,85E-01 | 5,35E-01 | 8,07E-01 | Col6a4        | 0,56 | No  |
| ENSMUSG00000032575 | 9,78E-03  | 6,636300006  | 2,47E-02 | 8,75E-01 | 1,00E+00 | Manf          | 1,01 | No  |
| ENSMUSG00000032577 | 3,52E-03  | 7,511132628  | 3,53E-03 | 9,53E-01 | 1,00E+00 | Mapkapk3      | 1,00 | No  |
| ENSMUSG00000032578 | 7,70E-02  | 8,234148525  | 1,78E+00 | 1,82E-01 | 5,45E-01 | Cish          | 1,05 | No  |
| ENSMUSG00000032579 | 2,29E-01  | 5,836781136  | 1,19E+01 | 5,57E-04 | 1,00E-02 | Hemk1         | 1,17 | Yes |
| ENSMUSG00000032580 | 5,30E-02  | 6,559294835  | 7,25E-01 | 3,94E-01 | 6,95E-01 | Rbm5          | 1,04 | No  |
| ENSMUSG00000032582 | -8,75E-02 | 5,376093146  | 1,57E+00 | 2,10E-01 | 5,50E-01 | Rbm6          | 0,94 | No  |
| ENSMUSG00000032583 | -2,60E-02 | 3,961816211  | 8,49E-02 | 7,71E-01 | 9,42E-01 | Mon1a         | 0,98 | No  |
| ENSMUSG00000032584 | -5,96E-01 | -2,401337343 | 4,83E-01 | 4,87E-01 | 7,74E-01 | Mst1r         | 0,66 | No  |
| ENSMUSG00000032586 | 1,70E-01  | 3,227813751  | 2,48E+00 | 1,16E-01 | 4,21E-01 | Traip         | 1,13 | No  |
| ENSMUSG00000032589 | 3,79E-01  | 3,676820608  | 1,59E+01 | 6,84E-05 | 1,76E-03 | Bsn           | 1,30 | Yes |
| ENSMUSG00000032590 | 5,46E-02  | 5,470184441  | 6,23E-01 | 4,30E-01 | 7,23E-01 | Apeh          | 1,04 | No  |
| ENSMUSG00000032591 | 1,89E-01  | 0,801680445  | 7,03E-01 | 4,02E-01 | 7,00E-01 | Mst1          | 1,14 | No  |
| ENSMUSG00000032593 | 3,93E-02  | 4,036090166  | 2,01E-01 | 6,54E-01 | 8,79E-01 | Amigo3        | 1,03 | No  |
| ENSMUSG00000032594 | -8,47E-02 | 6,771667829  | 1,90E+00 | 1,68E-01 | 5,22E-01 | Ip6k1         | 0,94 | No  |
| ENSMUSG00000032595 | 2,29E-02  | -1,998057404 | 1,00E-03 | 9,75E-01 | 1,00E+00 | Cdhr4         | 1,02 | No  |

|                    |           |              |          |          |          |               |      |     |
|--------------------|-----------|--------------|----------|----------|----------|---------------|------|-----|
| ENSMUSG00000032596 | -2,97E-01 | 6,353303433  | 2,20E+01 | 2,69E-06 | 1,05E-04 | Uba7          | 0,81 | Yes |
| ENSMUSG00000032598 | 1,77E-02  | 5,614339081  | 6,80E-02 | 7,94E-01 | 9,56E-01 | Nckipsd       | 1,01 | No  |
| ENSMUSG00000032599 | -2,21E-01 | 4,576702908  | 7,80E+00 | 5,24E-03 | 5,78E-02 | Ip6k2         | 0,86 | No  |
| ENSMUSG00000032601 | 9,23E-02  | 7,116277025  | 2,34E+00 | 1,26E-01 | 4,45E-01 | Prkar2a       | 1,07 | No  |
| ENSMUSG00000032602 | 6,02E-02  | 4,449338545  | 5,42E-01 | 4,62E-01 | 7,50E-01 | Slc25a20      | 1,04 | No  |
| ENSMUSG00000032604 | -3,02E-02 | 6,296206733  | 2,25E-01 | 6,35E-01 | 8,67E-01 | Qars          | 0,98 | No  |
| ENSMUSG00000032606 | -1,74E-01 | 3,161833029  | 2,54E+00 | 1,11E-01 | 4,09E-01 | Nicn1         | 0,89 | No  |
| ENSMUSG00000032607 | 7,58E-02  | 0,160004964  | 7,87E-02 | 7,79E-01 | 9,47E-01 | Amt           | 1,05 | No  |
| ENSMUSG00000032609 | -4,61E-01 | 2,557902543  | 1,36E+01 | 2,23E-04 | 4,75E-03 | Klhdc8b       | 0,73 | Yes |
| ENSMUSG00000032611 | 3,51E-01  | -1,205916851 | 5,99E-01 | 4,39E-01 | 7,32E-01 | 1700102P08Rik | 1,28 | No  |
| ENSMUSG00000032612 | -3,43E-02 | 7,056905424  | 3,22E-01 | 5,70E-01 | 8,31E-01 | Usp4          | 0,98 | No  |
| ENSMUSG00000032615 | 1,42E-01  | 4,034923709  | 2,57E+00 | 1,09E-01 | 4,05E-01 | Nt5m          | 1,10 | No  |
| ENSMUSG00000032621 | 1,23E-01  | 5,915377012  | 3,45E+00 | 6,33E-02 | 3,14E-01 | Srek1         | 1,09 | No  |
| ENSMUSG00000032623 | -4,08E-02 | -2,963255775 | 7,59E-04 | 9,78E-01 | 1,00E+00 | Oas1d         | 0,97 | No  |
| ENSMUSG00000032624 | -2,27E-02 | 5,882384461  | 1,18E-01 | 7,32E-01 | 9,22E-01 | Eml4          | 0,98 | No  |
| ENSMUSG00000032625 | -1,87E+00 | -3,107637761 | 1,39E+00 | 2,38E-01 | 5,50E-01 | Thsd7a        | 0,27 | No  |
| ENSMUSG00000032633 | 1,31E-01  | 6,001637069  | 4,02E+00 | 4,49E-02 | 2,53E-01 | Ficn          | 1,10 | No  |
| ENSMUSG00000032637 | -3,30E-02 | 7,818444877  | 3,19E-01 | 5,72E-01 | 8,32E-01 | Atxn2l        | 0,98 | No  |
| ENSMUSG00000032640 | 1,73E-01  | 5,977585328  | 6,85E+00 | 8,86E-03 | 8,54E-02 | Chsy1         | 1,13 | No  |
| ENSMUSG00000032641 | 3,92E-01  | 1,775728933  | 5,85E+00 | 1,56E-02 | 1,29E-01 | Gpr19         | 1,31 | No  |
| ENSMUSG00000032643 | 5,75E-02  | 4,614134108  | 5,37E-01 | 4,64E-01 | 7,52E-01 | Fhl3          | 1,04 | No  |
| ENSMUSG00000032648 | -9,35E-02 | 0,868744305  | 1,65E-01 | 6,85E-01 | 8,97E-01 | Pygm          | 0,94 | No  |
| ENSMUSG00000032649 | 1,86E+00  | -1,497761848 | 8,83E+00 | 2,96E-03 | 3,80E-02 | Colgalt2      | 3,62 | Yes |
| ENSMUSG00000032652 | -3,97E-01 | 5,097123153  | 3,06E+01 | 3,21E-08 | 1,99E-06 | Crebl2        | 0,76 | Yes |
| ENSMUSG00000032656 | 3,96E-01  | 4,425451039  | 2,29E+01 | 1,71E-06 | 7,13E-05 | March3        | 1,32 | Yes |
| ENSMUSG00000032657 | 9,67E-02  | 2,987043449  | 7,05E-01 | 4,01E-01 | 6,99E-01 | Fam189b       | 1,07 | No  |
| ENSMUSG00000032661 | -7,27E-02 | 4,725375912  | 9,03E-01 | 3,42E-01 | 6,42E-01 | Oas3          | 0,95 | No  |
| ENSMUSG00000032666 | -2,68E-02 | 5,780318938  | 1,61E-01 | 6,88E-01 | 8,98E-01 | 1700025G04Rik | 0,98 | No  |
| ENSMUSG00000032667 | -1,08E-01 | 6,840429936  | 3,11E+00 | 7,80E-02 | 3,57E-01 | Pon2          | 0,93 | No  |
| ENSMUSG00000032673 | -9,21E-02 | 4,333754324  | 1,24E+00 | 2,66E-01 | 5,62E-01 | Prorsd1       | 0,94 | No  |
| ENSMUSG00000032679 | -9,30E-02 | 1,051860122  | 2,08E-01 | 6,48E-01 | 8,75E-01 | Cd59a         | 0,94 | No  |
| ENSMUSG00000032680 | -5,88E-02 | -3,033616507 | 1,62E-03 | 9,68E-01 | 1,00E+00 | 6820408C15Rik | 0,96 | No  |

|                    |           |              |          |          |          |               |      |     |
|--------------------|-----------|--------------|----------|----------|----------|---------------|------|-----|
| ENSMUSG00000032688 | -3,19E-01 | 9,287833273  | 3,14E+01 | 2,15E-08 | 1,39E-06 | Malt1         | 0,80 | Yes |
| ENSMUSG00000032690 | -1,35E-01 | 2,393687095  | 1,10E+00 | 2,94E-01 | 5,89E-01 | Oas2          | 0,91 | No  |
| ENSMUSG00000032691 | 1,24E-01  | 8,306714608  | 4,57E+00 | 3,26E-02 | 2,11E-01 | Nlrp3         | 1,09 | No  |
| ENSMUSG00000032698 | -1,69E-01 | 5,737122617  | 6,32E+00 | 1,19E-02 | 1,06E-01 | Lmo2          | 0,89 | No  |
| ENSMUSG00000032702 | 3,35E-01  | -1,4729841   | 3,89E-01 | 5,33E-01 | 8,06E-01 | Kank1         | 1,26 | No  |
| ENSMUSG00000032705 | 7,07E-02  | 4,187859009  | 6,93E-01 | 4,05E-01 | 7,02E-01 | Exd2          | 1,05 | No  |
| ENSMUSG00000032712 | -2,06E-01 | 7,338737998  | 1,20E+01 | 5,43E-04 | 9,82E-03 | 2810474O19Rik | 0,87 | Yes |
| ENSMUSG00000032714 | 4,75E-01  | -1,879886473 | 5,01E-01 | 4,79E-01 | 7,66E-01 | Syde1         | 1,39 | No  |
| ENSMUSG00000032715 | 3,94E-01  | 2,930149849  | 1,19E+01 | 5,51E-04 | 9,93E-03 | Trib3         | 1,31 | Yes |
| ENSMUSG00000032717 | 1,02E+00  | -1,963315913 | 2,04E+00 | 1,53E-01 | 4,96E-01 | Mdfi          | 2,03 | No  |
| ENSMUSG00000032718 | 4,52E-03  | 2,99790944   | 1,65E-03 | 9,68E-01 | 1,00E+00 | Mansc1        | 1,00 | No  |
| ENSMUSG00000032719 | 1,11E-02  | -2,165753032 | 2,31E-04 | 9,88E-01 | 1,00E+00 | Sbspon        | 1,01 | No  |
| ENSMUSG00000032724 | -5,66E-01 | 4,653303923  | 5,33E+01 | 2,91E-13 | 3,83E-11 | Abtb2         | 0,68 | Yes |
| ENSMUSG00000032725 | -1,91E-01 | -1,42491056  | 1,51E-01 | 6,98E-01 | 9,04E-01 | Folr2         | 0,88 | No  |
| ENSMUSG00000032726 | 7,74E-01  | -0,816428304 | 3,15E+00 | 7,61E-02 | 3,52E-01 | Bmp8a         | 1,71 | No  |
| ENSMUSG00000032727 | -9,72E-02 | 3,917880693  | 1,20E+00 | 2,74E-01 | 5,71E-01 | Mier3         | 0,93 | No  |
| ENSMUSG00000032733 | 7,43E-02  | 3,368066942  | 5,40E-01 | 4,63E-01 | 7,51E-01 | Snx33         | 1,05 | No  |
| ENSMUSG00000032735 | -2,68E+00 | -3,033645766 | 2,84E+00 | 9,17E-02 | 3,82E-01 | Ablim3        | 0,16 | No  |
| ENSMUSG00000032737 | -1,17E-01 | 5,977748846  | 3,18E+00 | 7,46E-02 | 3,47E-01 | Inpp1         | 0,92 | No  |
| ENSMUSG00000032739 | -4,03E-01 | 3,844870953  | 2,00E+01 | 7,93E-06 | 2,73E-04 | Pram1         | 0,76 | Yes |
| ENSMUSG00000032740 | -1,22E-01 | 7,566045622  | 4,25E+00 | 3,92E-02 | 2,35E-01 | Ccdc88a       | 0,92 | No  |
| ENSMUSG00000032741 | -1,47E-01 | 5,294821817  | 4,31E+00 | 3,78E-02 | 2,31E-01 | Tpcn1         | 0,90 | No  |
| ENSMUSG00000032743 | 1,47E-01  | 4,59108576   | 3,43E+00 | 6,40E-02 | 3,16E-01 | D430042O09Rik | 1,11 | No  |
| ENSMUSG00000032744 | -1,95E+00 | -3,033628749 | 1,50E+00 | 2,21E-01 | 5,50E-01 | Heyl          | 0,26 | No  |
| ENSMUSG00000032745 | -2,12E-01 | 6,784953143  | 1,20E+01 | 5,42E-04 | 9,81E-03 | Gpbp1         | 0,86 | Yes |
| ENSMUSG00000032754 | 1,20E-01  | 5,725273023  | 3,19E+00 | 7,43E-02 | 3,47E-01 | Slc8b1        | 1,09 | No  |
| ENSMUSG00000032757 | 1,28E-01  | 4,43478907   | 2,46E+00 | 1,17E-01 | 4,24E-01 | Bet1          | 1,09 | No  |
| ENSMUSG00000032763 | -1,01E-01 | 4,774003892  | 1,71E+00 | 1,91E-01 | 5,50E-01 | Ilvbl         | 0,93 | No  |
| ENSMUSG00000032766 | 3,48E-01  | 2,163437789  | 5,84E+00 | 1,57E-02 | 1,30E-01 | Gng11         | 1,27 | No  |
| ENSMUSG00000032769 | -1,87E+00 | -3,107637761 | 1,39E+00 | 2,38E-01 | 5,50E-01 | Trpa1         | 0,27 | No  |
| ENSMUSG00000032773 | -1,91E+00 | -2,998001842 | 1,45E+00 | 2,28E-01 | 5,50E-01 | Chrm1         | 0,27 | No  |
| ENSMUSG00000032776 | -3,29E-01 | -1,165695685 | 4,67E-01 | 4,94E-01 | 7,80E-01 | Mctp2         | 0,80 | No  |

|                    |           |              |          |          |          |               |      |     |
|--------------------|-----------|--------------|----------|----------|----------|---------------|------|-----|
| ENSMUSG00000032777 | 5,03E-02  | 6,447046767  | 6,40E-01 | 4,24E-01 | 7,18E-01 | Gtf3c1        | 1,04 | No  |
| ENSMUSG00000032782 | 1,18E-01  | 3,653641566  | 1,54E+00 | 2,14E-01 | 5,50E-01 | Cntrob        | 1,09 | No  |
| ENSMUSG00000032783 | 3,75E-01  | 3,33096729   | 1,33E+01 | 2,66E-04 | 5,50E-03 | Troap         | 1,30 | Yes |
| ENSMUSG00000032786 | 2,54E-03  | 8,76816263   | 1,98E-03 | 9,65E-01 | 1,00E+00 | Alas1         | 1,00 | No  |
| ENSMUSG00000032788 | 3,14E-01  | 6,185149232  | 2,37E+01 | 1,15E-06 | 5,03E-05 | Pdxk          | 1,24 | Yes |
| ENSMUSG00000032796 | -6,48E-02 | -2,770611747 | 3,82E-03 | 9,51E-01 | 1,00E+00 | Lama1         | 0,96 | No  |
| ENSMUSG00000032802 | 2,71E-03  | 7,121785545  | 2,01E-03 | 9,64E-01 | 1,00E+00 | Srxn1         | 1,00 | No  |
| ENSMUSG00000032803 | 6,81E-02  | 7,519984109  | 1,33E+00 | 2,49E-01 | 5,50E-01 | Cdv3          | 1,05 | No  |
| ENSMUSG00000032812 | 9,24E-02  | 7,486376052  | 2,43E+00 | 1,19E-01 | 4,30E-01 | Arap1         | 1,07 | No  |
| ENSMUSG00000032815 | 1,47E-01  | 5,070142311  | 4,02E+00 | 4,50E-02 | 2,53E-01 | Fanca         | 1,11 | No  |
| ENSMUSG00000032816 | -3,98E-02 | -2,497586676 | 1,48E-03 | 9,69E-01 | 1,00E+00 | Igdcc4        | 0,97 | No  |
| ENSMUSG00000032818 | -1,34E+00 | -2,896122948 | 1,12E+00 | 2,89E-01 | 5,85E-01 | Loxhd1        | 0,39 | No  |
| ENSMUSG00000032826 | -3,86E-01 | 1,014890205  | 3,41E+00 | 6,49E-02 | 3,19E-01 | Ank2          | 0,77 | No  |
| ENSMUSG00000032827 | -2,33E-01 | 1,493233892  | 1,73E+00 | 1,88E-01 | 5,50E-01 | Ppp1r9a       | 0,85 | No  |
| ENSMUSG00000032834 | 8,28E-02  | 4,386331186  | 1,02E+00 | 3,14E-01 | 6,14E-01 | Pwp2          | 1,06 | No  |
| ENSMUSG00000032839 | -7,36E-01 | -2,548221181 | 6,07E-01 | 4,36E-01 | 7,29E-01 | Trpc1         | 0,60 | No  |
| ENSMUSG00000032840 | 1,28E-01  | 4,319705773  | 2,37E+00 | 1,23E-01 | 4,39E-01 | 2410131K14Rik | 1,09 | No  |
| ENSMUSG00000032841 | 3,82E-02  | 5,413268075  | 3,07E-01 | 5,80E-01 | 8,36E-01 | Prr5l         | 1,03 | No  |
| ENSMUSG00000032842 | 2,79E-02  | 3,688996114  | 8,73E-02 | 7,68E-01 | 9,41E-01 | Abcc10        | 1,02 | No  |
| ENSMUSG00000032845 | 1,75E-01  | 3,854476912  | 3,63E+00 | 5,66E-02 | 2,93E-01 | Alpk2         | 1,13 | No  |
| ENSMUSG00000032846 | 1,86E-01  | 5,111200345  | 6,32E+00 | 1,19E-02 | 1,06E-01 | Zswim6        | 1,14 | No  |
| ENSMUSG00000032849 | 2,08E-01  | 5,292873543  | 8,37E+00 | 3,81E-03 | 4,56E-02 | Abcc4         | 1,15 | Yes |
| ENSMUSG00000032850 | -2,67E-01 | 0,477137291  | 1,24E+00 | 2,65E-01 | 5,60E-01 | Rnft2         | 0,83 | No  |
| ENSMUSG00000032852 | 1,87E+00  | -3,107639691 | 1,38E+00 | 2,40E-01 | 5,50E-01 | Rspo4         | 3,67 | No  |
| ENSMUSG00000032855 | 9,16E-02  | 6,834475249  | 2,24E+00 | 1,35E-01 | 4,62E-01 | Pkd1          | 1,07 | No  |
| ENSMUSG00000032860 | 2,16E-01  | 3,501014425  | 4,72E+00 | 2,98E-02 | 1,97E-01 | P2ry2         | 1,16 | No  |
| ENSMUSG00000032864 | 6,32E-01  | -3,07016611  | 1,62E-01 | 6,88E-01 | 8,98E-01 | Rag2          | 1,55 | No  |
| ENSMUSG00000032867 | -2,60E-02 | 6,037433263  | 1,58E-01 | 6,91E-01 | 9,00E-01 | Fbxw8         | 0,98 | No  |
| ENSMUSG00000032869 | -1,87E-02 | 4,975542474  | 6,39E-02 | 8,00E-01 | 9,61E-01 | Psmf1         | 0,99 | No  |
| ENSMUSG00000032870 | -2,14E-01 | 7,437062472  | 1,30E+01 | 3,20E-04 | 6,39E-03 | Smap2         | 0,86 | Yes |
| ENSMUSG00000032872 | 5,20E-02  | 5,261011704  | 5,32E-01 | 4,66E-01 | 7,54E-01 | Cyb5r4        | 1,04 | No  |
| ENSMUSG00000032875 | -4,34E-01 | 1,128905977  | 4,53E+00 | 3,32E-02 | 2,14E-01 | Arhgef17      | 0,74 | No  |

|                    |           |              |           |          |          |               |      |     |
|--------------------|-----------|--------------|-----------|----------|----------|---------------|------|-----|
| ENSMUSG00000032878 | -4,30E-02 | 3,890667281  | 2,19E-01  | 6,40E-01 | 8,70E-01 | Ccdc85a       | 0,97 | No  |
| ENSMUSG00000032883 | 6,50E-01  | 4,781333821  | 7,03E+01  | 4,98E-17 | 9,22E-15 | Acsl3         | 1,57 | Yes |
| ENSMUSG00000032889 | -1,17E-01 | 1,881573014  | 5,90E-01  | 4,43E-01 | 7,34E-01 | Gm6685        | 0,92 | No  |
| ENSMUSG00000032890 | -7,87E-02 | 1,024016903  | 1,52E-01  | 6,97E-01 | 9,03E-01 | Rims3         | 0,95 | No  |
| ENSMUSG00000032892 | -2,33E-01 | -0,093409588 | 6,01E-01  | 4,38E-01 | 7,31E-01 | Rangrf        | 0,85 | No  |
| ENSMUSG00000032897 | 1,78E-01  | 4,217022595  | 4,41E+00  | 3,58E-02 | 2,24E-01 | Nfyc          | 1,13 | No  |
| ENSMUSG00000032898 | -1,53E-01 | 4,525628174  | 3,69E+00  | 5,48E-02 | 2,87E-01 | Fbxo21        | 0,90 | No  |
| ENSMUSG00000032899 | 1,13E+00  | -2,070312207 | 2,61E+00  | 1,06E-01 | 3,99E-01 | Styk1         | 2,19 | No  |
| ENSMUSG00000032902 | 3,37E-01  | 4,92235451   | 2,01E+01  | 7,45E-06 | 2,58E-04 | Slc16a1       | 1,26 | Yes |
| ENSMUSG00000032905 | -1,26E-01 | 5,727074034  | 3,53E+00  | 6,02E-02 | 3,04E-01 | Atg12         | 0,92 | No  |
| ENSMUSG00000032908 | 3,06E-01  | -1,522664898 | 3,46E-01  | 5,56E-01 | 8,21E-01 | Sgpp2         | 1,24 | No  |
| ENSMUSG00000032911 | 5,18E-01  | -0,4727403   | 2,27E+00  | 1,32E-01 | 4,56E-01 | Cspg4         | 1,43 | No  |
| ENSMUSG00000032913 | 1,07E-01  | 4,237941382  | 1,62E+00  | 2,03E-01 | 5,50E-01 | Lrig2         | 1,08 | No  |
| ENSMUSG00000032915 | -8,26E-01 | 2,915676151  | 4,99E+01  | 1,65E-12 | 1,96E-10 | Adgre4        | 0,56 | Yes |
| ENSMUSG00000032932 | 5,24E-02  | 5,250018178  | 5,37E-01  | 4,64E-01 | 7,52E-01 | Hspa13        | 1,04 | No  |
| ENSMUSG00000032937 | 1,81E+00  | -3,10765737  | 1,28E+00  | 2,58E-01 | 5,50E-01 | Fshr          | 3,49 | No  |
| ENSMUSG00000032939 | -9,41E-03 | 5,859657797  | 2,01E-02  | 8,87E-01 | 1,00E+00 | Nup93         | 0,99 | No  |
| ENSMUSG00000032940 | -1,78E+00 | -0,547886572 | 2,36E+01  | 1,20E-06 | 5,22E-05 | Rbm11         | 0,29 | Yes |
| ENSMUSG00000032942 | -3,79E-01 | -0,980463794 | 6,34E-01  | 4,26E-01 | 7,20E-01 | Ucp3          | 0,77 | No  |
| ENSMUSG00000032946 | -1,00E-01 | 1,539292373  | 3,20E-01  | 5,72E-01 | 8,32E-01 | Rasgrp2       | 0,93 | No  |
| ENSMUSG00000032952 | 3,94E-02  | 4,115038693  | 2,05E-01  | 6,51E-01 | 8,76E-01 | Ap4b1         | 1,03 | No  |
| ENSMUSG00000032959 | 7,02E-02  | 6,409592206  | 1,24E+00  | 2,66E-01 | 5,62E-01 | Pebp1         | 1,05 | No  |
| ENSMUSG00000032965 | -2,66E-01 | 3,728166844  | 8,11E+00  | 4,40E-03 | 5,07E-02 | lft57         | 0,83 | No  |
| ENSMUSG00000032966 | -4,33E-04 | 7,796808678  | 5,48E-05  | 9,94E-01 | 1,00E+00 | Fkbp1a        | 1,00 | No  |
| ENSMUSG00000032968 | -1,94E+00 | -3,107619243 | 1,50E+00  | 2,21E-01 | 5,50E-01 | Inha          | 0,26 | No  |
| ENSMUSG00000032977 | 8,67E-02  | 4,419757919  | 1,15E+00  | 2,84E-01 | 5,80E-01 | Fam207a       | 1,06 | No  |
| ENSMUSG00000032978 | 9,01E-03  | -3,107646452 | -5,16E-10 | 1,00E+00 | 1,00E+00 | Guca2b        | 1,01 | No  |
| ENSMUSG00000032985 | 7,26E-01  | -2,896176066 | 2,87E-01  | 5,92E-01 | 8,42E-01 | 5730522E02Rik | 1,65 | No  |
| ENSMUSG00000032988 | -2,07E-01 | -0,980459885 | 2,10E-01  | 6,47E-01 | 8,74E-01 | Slc16a8       | 0,87 | No  |
| ENSMUSG00000032997 | 1,63E-01  | 4,712282749  | 4,37E+00  | 3,66E-02 | 2,27E-01 | Chpf          | 1,12 | No  |
| ENSMUSG00000032998 | -8,61E-02 | 5,545110272  | 1,56E+00  | 2,12E-01 | 5,50E-01 | Foxj3         | 0,94 | No  |
| ENSMUSG00000032999 | -9,41E-01 | -2,497567965 | 7,76E-01  | 3,78E-01 | 6,79E-01 | Nlrp4f        | 0,52 | No  |

|                    |           |              |          |          |          |               |      |     |
|--------------------|-----------|--------------|----------|----------|----------|---------------|------|-----|
| ENSMUSG00000033004 | 8,21E-02  | 8,535881361  | 2,05E+00 | 1,53E-01 | 4,95E-01 | Mycbp2        | 1,06 | No  |
| ENSMUSG00000033007 | -2,20E-02 | -3,107641896 | 1,16E-04 | 9,91E-01 | 1,00E+00 | Asic4         | 0,98 | No  |
| ENSMUSG00000033009 | 1,78E-01  | 4,750468929  | 5,30E+00 | 2,13E-02 | 1,57E-01 | Ogfod1        | 1,13 | No  |
| ENSMUSG00000033014 | -6,20E-02 | 5,81604569   | 8,74E-01 | 3,50E-01 | 6,51E-01 | Trim33        | 0,96 | No  |
| ENSMUSG00000033015 | -1,87E+00 | -3,107637761 | 1,39E+00 | 2,38E-01 | 5,50E-01 | 4933427E13Rik | 0,27 | No  |
| ENSMUSG00000033016 | 4,57E-02  | 6,485399961  | 5,28E-01 | 4,67E-01 | 7,56E-01 | Nfatc1        | 1,03 | No  |
| ENSMUSG00000033020 | 1,10E-01  | 3,815271885  | 1,39E+00 | 2,38E-01 | 5,50E-01 | Polr2f        | 1,08 | No  |
| ENSMUSG00000033021 | 9,00E-02  | 5,458915568  | 1,68E+00 | 1,95E-01 | 5,50E-01 | Gmppa         | 1,06 | No  |
| ENSMUSG00000033022 | -1,16E-01 | -0,561250615 | 1,08E-01 | 7,42E-01 | 9,27E-01 | Cdo1          | 0,92 | No  |
| ENSMUSG00000033024 | 6,88E-01  | -1,86378749  | 1,12E+00 | 2,90E-01 | 5,86E-01 | Klra9         | 1,61 | No  |
| ENSMUSG00000033029 | -7,04E-04 | 4,412497822  | 7,49E-05 | 9,93E-01 | 1,00E+00 | 1700088E04Rik | 1,00 | No  |
| ENSMUSG00000033031 | 1,28E-01  | 5,396046761  | 3,34E+00 | 6,77E-02 | 3,28E-01 | C330027C09Rik | 1,09 | No  |
| ENSMUSG00000033032 | 3,19E-01  | 0,045082261  | 1,10E+00 | 2,94E-01 | 5,89E-01 | Afap1l1       | 1,25 | No  |
| ENSMUSG00000033033 | 4,49E-01  | 3,513657549  | 2,15E+01 | 3,58E-06 | 1,36E-04 | Calhm2        | 1,36 | Yes |
| ENSMUSG00000033036 | 1,06E-02  | 2,622446999  | 7,22E-03 | 9,32E-01 | 1,00E+00 | Gm7879        | 1,01 | No  |
| ENSMUSG00000033039 | 4,51E-02  | 5,956597262  | 4,74E-01 | 4,91E-01 | 7,77E-01 | Micall1       | 1,03 | No  |
| ENSMUSG00000033044 | 1,09E+00  | -2,655198148 | 1,14E+00 | 2,86E-01 | 5,82E-01 | Dhrs7c        | 2,14 | No  |
| ENSMUSG00000033047 | 1,51E-02  | 7,0185558    | 6,24E-02 | 8,03E-01 | 9,62E-01 | Eif3l         | 1,01 | No  |
| ENSMUSG00000033054 | 5,23E-02  | 4,723572529  | 4,55E-01 | 5,00E-01 | 7,85E-01 | Npat          | 1,04 | No  |
| ENSMUSG00000033055 | 6,14E-02  | 4,190708236  | 5,23E-01 | 4,69E-01 | 7,58E-01 | Ankrd54       | 1,04 | No  |
| ENSMUSG00000033059 | -4,04E-02 | 5,811866995  | 3,66E-01 | 5,45E-01 | 8,13E-01 | Pygb          | 0,97 | No  |
| ENSMUSG00000033060 | -7,18E-01 | -2,497524352 | 5,77E-01 | 4,47E-01 | 7,38E-01 | Lmo7          | 0,61 | No  |
| ENSMUSG00000033065 | 1,62E-01  | 2,766436787  | 1,76E+00 | 1,85E-01 | 5,49E-01 | Pfkm          | 1,12 | No  |
| ENSMUSG00000033066 | 4,57E-02  | 7,235626694  | 5,78E-01 | 4,47E-01 | 7,38E-01 | Gas7          | 1,03 | No  |
| ENSMUSG00000033068 | 1,71E-01  | 3,696953611  | 3,33E+00 | 6,82E-02 | 3,29E-01 | Entpd6        | 1,13 | No  |
| ENSMUSG00000033075 | -1,81E-02 | 5,549172598  | 6,97E-02 | 7,92E-01 | 9,55E-01 | Senp1         | 0,99 | No  |
| ENSMUSG00000033082 | 3,20E-01  | 2,065109866  | 4,56E+00 | 3,27E-02 | 2,11E-01 | Clec1a        | 1,25 | No  |
| ENSMUSG00000033083 | -6,08E-01 | 6,57355807   | 9,54E+01 | 1,54E-22 | 4,62E-20 | Tbc1d4        | 0,66 | Yes |
| ENSMUSG00000033088 | -3,07E-01 | 6,189094814  | 2,31E+01 | 1,57E-06 | 6,62E-05 | Triobp        | 0,81 | Yes |
| ENSMUSG00000033096 | -5,79E-02 | 5,0659006    | 6,17E-01 | 4,32E-01 | 7,26E-01 | Apmap         | 0,96 | No  |
| ENSMUSG00000033099 | 1,26E-02  | 4,605594293  | 2,59E-02 | 8,72E-01 | 1,00E+00 | Nol12         | 1,01 | No  |
| ENSMUSG00000033102 | -1,46E-01 | 4,630696756  | 3,52E+00 | 6,07E-02 | 3,05E-01 | Cdc14b        | 0,90 | No  |

|                    |           |              |          |          |          |               |      |     |
|--------------------|-----------|--------------|----------|----------|----------|---------------|------|-----|
| ENSMUSG00000033105 | 3,59E-01  | 5,423352291  | 2,66E+01 | 2,53E-07 | 1,30E-05 | Lss           | 1,28 | Yes |
| ENSMUSG00000033106 | -7,43E-02 | 5,02316007   | 1,02E+00 | 3,12E-01 | 6,12E-01 | Slc7a6os      | 0,95 | No  |
| ENSMUSG00000033107 | -8,37E-01 | -0,785615423 | 3,81E+00 | 5,09E-02 | 2,74E-01 | Rnf125        | 0,56 | No  |
| ENSMUSG00000033111 | -9,42E-02 | 4,000891597  | 1,15E+00 | 2,84E-01 | 5,80E-01 | 3830406C13Rik | 0,94 | No  |
| ENSMUSG00000033114 | -7,98E-02 | 3,284373117  | 5,86E-01 | 4,44E-01 | 7,35E-01 | Slc35d2       | 0,95 | No  |
| ENSMUSG00000033124 | 1,35E-01  | 5,563863896  | 3,86E+00 | 4,95E-02 | 2,69E-01 | Atg9a         | 1,10 | No  |
| ENSMUSG00000033126 | 2,47E-01  | 1,986355724  | 2,79E+00 | 9,49E-02 | 3,86E-01 | Ybey          | 1,19 | No  |
| ENSMUSG00000033128 | 5,31E-02  | 6,589448399  | 7,26E-01 | 3,94E-01 | 6,95E-01 | Gga1          | 1,04 | No  |
| ENSMUSG00000033147 | -1,90E-01 | 4,535907257  | 5,77E+00 | 1,63E-02 | 1,33E-01 | Slc22a15      | 0,88 | No  |
| ENSMUSG00000033149 | -2,43E+00 | -2,146044648 | 8,30E+00 | 3,97E-03 | 4,71E-02 | Phldb2        | 0,19 | Yes |
| ENSMUSG00000033152 | 5,15E-01  | -1,236652064 | 9,41E-01 | 3,32E-01 | 6,32E-01 | Podxl2        | 1,43 | No  |
| ENSMUSG00000033156 | 3,18E+00  | -2,963245465 | 4,13E+00 | 4,21E-02 | 2,44E-01 | Cst10         | 9,06 | No  |
| ENSMUSG00000033157 | 3,75E-02  | 3,328770073  | 1,32E-01 | 7,17E-01 | 9,13E-01 | Abhd10        | 1,03 | No  |
| ENSMUSG00000033159 | -8,48E-03 | 6,781526766  | 1,91E-02 | 8,90E-01 | 1,00E+00 | Cnppd1        | 0,99 | No  |
| ENSMUSG00000033161 | 7,64E-02  | 8,842697     | 1,79E+00 | 1,81E-01 | 5,42E-01 | Atp1a1        | 1,05 | No  |
| ENSMUSG00000033166 | 1,30E-01  | 4,113475014  | 2,21E+00 | 1,37E-01 | 4,66E-01 | Dis3          | 1,09 | No  |
| ENSMUSG00000033170 | 1,04E+00  | 0,412453332  | 1,42E+01 | 1,63E-04 | 3,66E-03 | Card10        | 2,06 | Yes |
| ENSMUSG00000033174 | 1,57E-01  | 7,995511665  | 7,28E+00 | 6,97E-03 | 7,15E-02 | Mgll          | 1,12 | No  |
| ENSMUSG00000033182 | 3,81E-01  | -0,683235071 | 9,01E-01 | 3,42E-01 | 6,43E-01 | Kbtbd12       | 1,30 | No  |
| ENSMUSG00000033184 | 9,81E-02  | 7,477382488  | 2,74E+00 | 9,81E-02 | 3,91E-01 | Tmed7         | 1,07 | No  |
| ENSMUSG00000033186 | 1,65E-02  | 5,456180347  | 5,60E-02 | 8,13E-01 | 9,67E-01 | Mzt1          | 1,01 | No  |
| ENSMUSG00000033187 | 7,81E-01  | -2,896104841 | 3,33E-01 | 5,64E-01 | 8,26E-01 | BC016579      | 1,72 | No  |
| ENSMUSG00000033191 | -1,19E+00 | -0,912536611 | 7,70E+00 | 5,52E-03 | 6,01E-02 | Tie1          | 0,44 | No  |
| ENSMUSG00000033192 | 5,43E-02  | 5,838509699  | 6,62E-01 | 4,16E-01 | 7,11E-01 | Lpcat2        | 1,04 | No  |
| ENSMUSG00000033196 | 1,86E+00  | -3,033661846 | 1,35E+00 | 2,46E-01 | 5,50E-01 | Myh2          | 3,62 | No  |
| ENSMUSG00000033207 | 3,41E-01  | 5,479858507  | 2,41E+01 | 9,32E-07 | 4,17E-05 | Mamdc2        | 1,27 | Yes |
| ENSMUSG00000033208 | 1,31E+00  | -0,980853698 | 8,24E+00 | 4,09E-03 | 4,81E-02 | S100b         | 2,48 | Yes |
| ENSMUSG00000033209 | -1,22E-01 | 1,681253877  | 4,91E-01 | 4,83E-01 | 7,71E-01 | Ttc28         | 0,92 | No  |
| ENSMUSG00000033210 | 1,46E+00  | -2,800989455 | 1,40E+00 | 2,36E-01 | 5,50E-01 | Slc9c1        | 2,76 | No  |
| ENSMUSG00000033213 | 9,09E-02  | 6,909946764  | 2,21E+00 | 1,38E-01 | 4,68E-01 | AA467197      | 1,07 | No  |
| ENSMUSG00000033214 | 1,82E+00  | -2,963269943 | 1,32E+00 | 2,51E-01 | 5,50E-01 | Slitrk5       | 3,54 | No  |
| ENSMUSG00000033216 | 7,37E-02  | 3,936778109  | 6,67E-01 | 4,14E-01 | 7,09E-01 | Eefsec        | 1,05 | No  |



|                    |           |              |          |          |          |          |      |     |
|--------------------|-----------|--------------|----------|----------|----------|----------|------|-----|
| ENSMUSG00000033220 | -5,29E-02 | 8,393698868  | 8,42E-01 | 3,59E-01 | 6,60E-01 | Rac2     | 0,96 | No  |
| ENSMUSG00000033222 | 2,36E-01  | 5,246957858  | 1,10E+01 | 9,09E-04 | 1,50E-02 | Ttf2     | 1,18 | Yes |
| ENSMUSG00000033227 | 2,64E-01  | 2,823939889  | 4,86E+00 | 2,74E-02 | 1,87E-01 | Wnt6     | 1,20 | No  |
| ENSMUSG00000033228 | -8,56E-03 | 7,152054092  | 2,02E-02 | 8,87E-01 | 1,00E+00 | Scaf11   | 0,99 | No  |
| ENSMUSG00000033233 | 2,65E-01  | 1,057856844  | 1,75E+00 | 1,85E-01 | 5,49E-01 | Trim45   | 1,20 | No  |
| ENSMUSG00000033237 | -3,18E-02 | 6,364041267  | 2,50E-01 | 6,17E-01 | 8,55E-01 | Arid2    | 0,98 | No  |
| ENSMUSG00000033249 | -1,95E-01 | 1,849239483  | 1,56E+00 | 2,12E-01 | 5,50E-01 | Hsf4     | 0,87 | No  |
| ENSMUSG00000033253 | 7,40E-02  | 5,678594419  | 1,20E+00 | 2,73E-01 | 5,69E-01 | Szt2     | 1,05 | No  |
| ENSMUSG00000033255 | 2,16E-02  | -1,472839343 | 1,63E-03 | 9,68E-01 | 1,00E+00 | Gm5134   | 1,02 | No  |
| ENSMUSG00000033256 | 4,82E-01  | -0,711706948 | 1,30E+00 | 2,54E-01 | 5,50E-01 | Shf      | 1,40 | No  |
| ENSMUSG00000033257 | 1,11E-01  | 5,549691545  | 2,63E+00 | 1,05E-01 | 3,97E-01 | Ttll4    | 1,08 | No  |
| ENSMUSG00000033268 | -7,38E-02 | -3,033634644 | 2,66E-03 | 9,59E-01 | 1,00E+00 | Duox1    | 0,95 | No  |
| ENSMUSG00000033272 | 3,17E-02  | 6,640048762  | 2,60E-01 | 6,10E-01 | 8,52E-01 | Slc35a4  | 1,02 | No  |
| ENSMUSG00000033276 | 2,92E-01  | 0,001817631  | 9,53E-01 | 3,29E-01 | 6,30E-01 | Stk36    | 1,22 | No  |
| ENSMUSG00000033278 | -5,01E-01 | -1,800954426 | 6,07E-01 | 4,36E-01 | 7,29E-01 | Ptprm    | 0,71 | No  |
| ENSMUSG00000033282 | 2,75E-01  | 2,865439848  | 5,52E+00 | 1,88E-02 | 1,45E-01 | Rpgrip1l | 1,21 | No  |
| ENSMUSG00000033285 | 1,10E-01  | 5,367384538  | 2,44E+00 | 1,18E-01 | 4,27E-01 | Wdr3     | 1,08 | No  |
| ENSMUSG00000033287 | 1,34E-01  | 5,628929365  | 3,83E+00 | 5,03E-02 | 2,72E-01 | Kctd17   | 1,10 | No  |
| ENSMUSG00000033294 | 1,19E-01  | 4,849383899  | 2,44E+00 | 1,18E-01 | 4,28E-01 | Noc4l    | 1,09 | No  |
| ENSMUSG00000033295 | -6,22E-01 | 2,026161849  | 1,74E+01 | 3,06E-05 | 8,93E-04 | Ptprf    | 0,65 | Yes |
| ENSMUSG00000033306 | -8,74E-02 | 7,012944671  | 2,08E+00 | 1,50E-01 | 4,91E-01 | Lpp      | 0,94 | No  |
| ENSMUSG00000033307 | 1,81E-01  | 5,121122862  | 6,13E+00 | 1,33E-02 | 1,15E-01 | Mif      | 1,13 | No  |
| ENSMUSG00000033313 | 2,16E-01  | 3,105668873  | 3,99E+00 | 4,57E-02 | 2,55E-01 | Fbxl8    | 1,16 | No  |
| ENSMUSG00000033316 | 2,30E-01  | 5,102456405  | 9,96E+00 | 1,60E-03 | 2,35E-02 | Galnt9   | 1,17 | Yes |
| ENSMUSG00000033318 | -1,48E-01 | 3,175142496  | 1,89E+00 | 1,69E-01 | 5,25E-01 | Gstt2    | 0,90 | No  |
| ENSMUSG00000033319 | 5,78E-02  | 6,582723171  | 8,61E-01 | 3,54E-01 | 6,55E-01 | Fem1c    | 1,04 | No  |
| ENSMUSG00000033323 | 1,86E-01  | 5,318865463  | 6,90E+00 | 8,60E-03 | 8,36E-02 | Ctdp1    | 1,14 | No  |
| ENSMUSG00000033326 | -1,75E-01 | 6,952800905  | 8,34E+00 | 3,87E-03 | 4,62E-02 | Kdm4a    | 0,89 | Yes |
| ENSMUSG00000033327 | 7,62E-01  | -2,831967678 | 3,15E-01 | 5,74E-01 | 8,34E-01 | Tnxb     | 1,70 | No  |
| ENSMUSG00000033335 | -2,24E-03 | 7,956381966  | 1,47E-03 | 9,69E-01 | 1,00E+00 | Dnm2     | 1,00 | No  |
| ENSMUSG00000033350 | -4,11E-01 | -0,91277331  | 1,02E+00 | 3,13E-01 | 6,12E-01 | Chst2    | 0,75 | No  |
| ENSMUSG00000033352 | 1,32E-01  | 6,963716131  | 4,69E+00 | 3,04E-02 | 2,00E-01 | Map2k4   | 1,10 | No  |

|                    |           |              |          |          |          |          |      |     |
|--------------------|-----------|--------------|----------|----------|----------|----------|------|-----|
| ENSMUSG00000033355 | -5,75E-01 | 2,386634789  | 1,88E+01 | 1,44E-05 | 4,62E-04 | Rtp4     | 0,67 | Yes |
| ENSMUSG00000033356 | 2,73E-01  | 2,597126468  | 4,61E+00 | 3,18E-02 | 2,07E-01 | Pus7l    | 1,21 | No  |
| ENSMUSG00000033364 | 5,77E-02  | 4,854579977  | 5,78E-01 | 4,47E-01 | 7,38E-01 | Usp37    | 1,04 | No  |
| ENSMUSG00000033365 | 2,77E-01  | 6,302637745  | 1,89E+01 | 1,34E-05 | 4,35E-04 | lpo13    | 1,21 | Yes |
| ENSMUSG00000033368 | -1,15E-01 | -1,165709088 | 5,37E-02 | 8,17E-01 | 9,69E-01 | Trim69   | 0,92 | No  |
| ENSMUSG00000033373 | 2,41E-01  | 3,359807184  | 5,56E+00 | 1,84E-02 | 1,43E-01 | Fntb     | 1,18 | No  |
| ENSMUSG00000033377 | -1,85E+00 | -2,96319884  | 1,39E+00 | 2,38E-01 | 5,50E-01 | Palmd    | 0,28 | No  |
| ENSMUSG00000033379 | 6,34E-02  | 7,36071135   | 1,13E+00 | 2,88E-01 | 5,84E-01 | Atp6v0b  | 1,04 | No  |
| ENSMUSG00000033382 | 1,33E-01  | 6,649725654  | 4,58E+00 | 3,23E-02 | 2,10E-01 | Trappc8  | 1,10 | No  |
| ENSMUSG00000033386 | 1,02E-01  | 7,060728143  | 2,86E+00 | 9,09E-02 | 3,82E-01 | Frrs1    | 1,07 | No  |
| ENSMUSG00000033389 | -8,41E-01 | -2,424818802 | 1,03E+00 | 3,10E-01 | 6,08E-01 | Arhgap44 | 0,56 | No  |
| ENSMUSG00000033392 | -4,66E-02 | 6,371973998  | 5,42E-01 | 4,62E-01 | 7,50E-01 | Clasp2   | 0,97 | No  |
| ENSMUSG00000033396 | -1,79E-02 | 6,188951847  | 7,81E-02 | 7,80E-01 | 9,48E-01 | Spg11    | 0,99 | No  |
| ENSMUSG00000033400 | 6,76E-02  | 6,164173771  | 1,10E+00 | 2,95E-01 | 5,91E-01 | Ag1      | 1,05 | No  |
| ENSMUSG00000033405 | 1,29E-01  | 1,507137741  | 5,66E-01 | 4,52E-01 | 7,41E-01 | Nudt15   | 1,09 | No  |
| ENSMUSG00000033409 | -1,42E-01 | 0,327510624  | 2,99E-01 | 5,84E-01 | 8,38E-01 | Syce1l   | 0,91 | No  |
| ENSMUSG00000033411 | 1,26E-01  | 4,49337479   | 2,46E+00 | 1,17E-01 | 4,23E-01 | Ctdspl2  | 1,09 | No  |
| ENSMUSG00000033416 | -1,85E-01 | 5,821649254  | 7,80E+00 | 5,22E-03 | 5,77E-02 | Gucd1    | 0,88 | No  |
| ENSMUSG00000033417 | 2,34E-02  | 6,788801428  | 1,45E-01 | 7,04E-01 | 9,06E-01 | Cacul1   | 1,02 | No  |
| ENSMUSG00000033419 | -5,23E-02 | -2,963273906 | 1,24E-03 | 9,72E-01 | 1,00E+00 | Snap91   | 0,96 | No  |
| ENSMUSG00000033420 | -9,23E-02 | 1,04742126   | 2,07E-01 | 6,49E-01 | 8,75E-01 | Antxr1   | 0,94 | No  |
| ENSMUSG00000033423 | 7,29E-02  | 4,480674676  | 8,06E-01 | 3,69E-01 | 6,71E-01 | Eri3     | 1,05 | No  |
| ENSMUSG00000033427 | -2,08E-01 | -0,448735667 | 3,48E-01 | 5,55E-01 | 8,20E-01 | Upb1     | 0,87 | No  |
| ENSMUSG00000033429 | -1,45E-01 | 3,504441119  | 2,11E+00 | 1,46E-01 | 4,85E-01 | Mcee     | 0,90 | No  |
| ENSMUSG00000033430 | -8,32E-03 | 4,310036036  | 1,01E-02 | 9,20E-01 | 1,00E+00 | Terf2ip  | 0,99 | No  |
| ENSMUSG00000033434 | -8,65E-03 | 3,767275172  | 8,56E-03 | 9,26E-01 | 1,00E+00 | Gtpbp6   | 0,99 | No  |
| ENSMUSG00000033439 | -8,36E-02 | 3,920707237  | 8,49E-01 | 3,57E-01 | 6,58E-01 | Trmt13   | 0,94 | No  |
| ENSMUSG00000033444 | -8,44E-02 | 6,242982476  | 1,74E+00 | 1,87E-01 | 5,50E-01 | Specc1l  | 0,94 | No  |
| ENSMUSG00000033446 | -1,02E-01 | 5,699955839  | 2,28E+00 | 1,31E-01 | 4,55E-01 | Lpar6    | 0,93 | No  |
| ENSMUSG00000033450 | 6,36E-02  | 3,942760403  | 5,03E-01 | 4,78E-01 | 7,66E-01 | Tagap    | 1,05 | No  |
| ENSMUSG00000033454 | 7,91E-02  | 4,770955658  | 1,09E+00 | 2,96E-01 | 5,92E-01 | Zbtb1    | 1,06 | No  |
| ENSMUSG00000033458 | 7,39E-02  | 2,815798922  | 3,97E-01 | 5,29E-01 | 8,04E-01 | Fan1     | 1,05 | No  |

|                    |           |              |           |          |          |          |      |     |
|--------------------|-----------|--------------|-----------|----------|----------|----------|------|-----|
| ENSMUSG00000033467 | 1,33E-01  | 6,02630587   | 4,08E+00  | 4,33E-02 | 2,47E-01 | Crlf2    | 1,10 | No  |
| ENSMUSG00000033470 | 9,58E-02  | 0,726510611  | 1,63E-01  | 6,87E-01 | 8,98E-01 | Cysltr2  | 1,07 | No  |
| ENSMUSG00000033475 | 3,66E-02  | 4,878227431  | 2,33E-01  | 6,29E-01 | 8,62E-01 | Tomm6    | 1,03 | No  |
| ENSMUSG00000033478 | 6,81E-02  | 5,410833067  | 9,58E-01  | 3,28E-01 | 6,29E-01 | Fam160b1 | 1,05 | No  |
| ENSMUSG00000033486 | -3,70E-01 | 0,691486331  | 2,76E+00  | 9,68E-02 | 3,88E-01 | Catsper2 | 0,77 | No  |
| ENSMUSG00000033487 | 1,10E-01  | 7,516929152  | 3,43E+00  | 6,40E-02 | 3,16E-01 | Fndc3a   | 1,08 | No  |
| ENSMUSG00000033488 | -5,01E-02 | 4,013931871  | 3,16E-01  | 5,74E-01 | 8,33E-01 | BC026585 | 0,97 | No  |
| ENSMUSG00000033498 | 7,56E-01  | -2,963268003 | 3,13E-01  | 5,76E-01 | 8,34E-01 | Strc     | 1,69 | No  |
| ENSMUSG00000033499 | 1,08E-01  | 7,446515532  | 3,32E+00  | 6,83E-02 | 3,29E-01 | Larp4b   | 1,08 | No  |
| ENSMUSG00000033501 | 3,14E-02  | -3,107617333 | -7,69E-10 | 1,00E+00 | 1,00E+00 | Crygs    | 1,02 | No  |
| ENSMUSG00000033502 | -1,51E-01 | 4,871373419  | 4,04E+00  | 4,43E-02 | 2,51E-01 | Cdc14a   | 0,90 | No  |
| ENSMUSG00000033508 | -1,31E+00 | -2,146048501 | 2,95E+00  | 8,61E-02 | 3,78E-01 | Asprv1   | 0,40 | No  |
| ENSMUSG00000033520 | -1,44E+00 | -0,740596874 | 1,45E+01  | 1,40E-04 | 3,20E-03 | Idi2     | 0,37 | Yes |
| ENSMUSG00000033526 | 2,87E-02  | 4,69536758   | 1,37E-01  | 7,12E-01 | 9,11E-01 | Ppip5k1  | 1,02 | No  |
| ENSMUSG00000033530 | -1,18E-01 | 4,92866165   | 2,48E+00  | 1,15E-01 | 4,20E-01 | Ttc7b    | 0,92 | No  |
| ENSMUSG00000033538 | -3,04E-01 | 3,999832825  | 1,16E+01  | 6,50E-04 | 1,14E-02 | Casp4    | 0,81 | Yes |
| ENSMUSG00000033540 | 5,80E-02  | 5,336367389  | 6,75E-01  | 4,11E-01 | 7,07E-01 | Idua     | 1,04 | No  |
| ENSMUSG00000033542 | 1,38E-01  | -0,904284095 | 8,52E-02  | 7,70E-01 | 9,42E-01 | Arhgef5  | 1,10 | No  |
| ENSMUSG00000033543 | 3,00E-02  | 4,38451318   | 1,34E-01  | 7,14E-01 | 9,12E-01 | Gtf2a2   | 1,02 | No  |
| ENSMUSG00000033544 | 4,22E-01  | -2,963241197 | 8,99E-02  | 7,64E-01 | 9,39E-01 | Angptl1  | 1,34 | No  |
| ENSMUSG00000033545 | -5,83E-02 | 5,456385707  | 7,10E-01  | 3,99E-01 | 6,98E-01 | Znrf1    | 0,96 | No  |
| ENSMUSG00000033554 | -9,63E-02 | 3,210010533  | 8,14E-01  | 3,67E-01 | 6,68E-01 | Dph5     | 0,94 | No  |
| ENSMUSG00000033557 | 4,76E-02  | 6,423163513  | 5,69E-01  | 4,51E-01 | 7,40E-01 | Fam20b   | 1,03 | No  |
| ENSMUSG00000033565 | 2,97E-01  | 3,718933396  | 9,80E+00  | 1,75E-03 | 2,51E-02 | Rbfox2   | 1,23 | Yes |
| ENSMUSG00000033576 | -3,83E-02 | -3,107651936 | -7,91E-11 | 1,00E+00 | 1,00E+00 | Apol6    | 0,97 | No  |
| ENSMUSG00000033577 | 3,58E-01  | 3,885681933  | 1,50E+01  | 1,08E-04 | 2,60E-03 | Myo6     | 1,28 | Yes |
| ENSMUSG00000033581 | -3,48E-01 | 3,870370622  | 1,49E+01  | 1,12E-04 | 2,67E-03 | Igf2bp2  | 0,79 | Yes |
| ENSMUSG00000033585 | 1,84E+00  | -3,033632273 | 1,33E+00  | 2,49E-01 | 5,50E-01 | Ndn      | 3,58 | No  |
| ENSMUSG00000033589 | 7,67E-02  | 5,429017378  | 1,20E+00  | 2,73E-01 | 5,69E-01 | Reep4    | 1,05 | No  |
| ENSMUSG00000033590 | -2,12E-01 | -1,998046952 | 1,10E-01  | 7,40E-01 | 9,26E-01 | Myo5c    | 0,86 | No  |
| ENSMUSG00000033594 | 2,83E-01  | 3,15025223   | 6,99E+00  | 8,20E-03 | 8,05E-02 | Spata2l  | 1,22 | No  |
| ENSMUSG00000033595 | 5,45E-01  | 1,25903549   | 7,52E+00  | 6,09E-03 | 6,49E-02 | Lgi3     | 1,46 | No  |

|                    |           |              |           |          |          |               |      |     |
|--------------------|-----------|--------------|-----------|----------|----------|---------------|------|-----|
| ENSMUSG00000033596 | 1,18E-01  | 6,046440043  | 3,29E+00  | 6,99E-02 | 3,34E-01 | Rfwd3         | 1,09 | No  |
| ENSMUSG00000033597 | 2,46E-01  | 0,396086284  | 9,06E-01  | 3,41E-01 | 6,42E-01 | Caskin1       | 1,19 | No  |
| ENSMUSG00000033610 | 1,64E-01  | 2,750565531  | 1,87E+00  | 1,71E-01 | 5,28E-01 | Pank1         | 1,12 | No  |
| ENSMUSG00000033615 | 9,01E-03  | -3,107646452 | -5,16E-10 | 1,00E+00 | 1,00E+00 | Cplx1         | 1,01 | No  |
| ENSMUSG00000033618 | 5,00E-01  | -0,963205841 | 1,35E+00  | 2,46E-01 | 5,50E-01 | Map3k13       | 1,41 | No  |
| ENSMUSG00000033623 | 1,60E-01  | 5,171650135  | 4,90E+00  | 2,68E-02 | 1,84E-01 | Pcgf3         | 1,12 | No  |
| ENSMUSG00000033624 | 1,86E-01  | 5,717886505  | 7,70E+00  | 5,54E-03 | 6,02E-02 | Pdpr          | 1,14 | No  |
| ENSMUSG00000033628 | -1,71E-02 | 4,837804532  | 5,08E-02  | 8,22E-01 | 9,72E-01 | Pik3c3        | 0,99 | No  |
| ENSMUSG00000033629 | 9,87E-02  | 5,354139369  | 1,95E+00  | 1,63E-01 | 5,13E-01 | Hacd3         | 1,07 | No  |
| ENSMUSG00000033632 | -5,36E-02 | 2,888819292  | 2,12E-01  | 6,45E-01 | 8,73E-01 | AW554918      | 0,96 | No  |
| ENSMUSG00000033634 | -1,88E+00 | -2,998026507 | 1,42E+00  | 2,33E-01 | 5,50E-01 | Nat8f2        | 0,27 | No  |
| ENSMUSG00000033644 | 3,25E-01  | 5,035090037  | 1,92E+01  | 1,19E-05 | 3,94E-04 | Piwil2        | 1,25 | Yes |
| ENSMUSG00000033653 | 2,30E-01  | 4,808253166  | 9,05E+00  | 2,63E-03 | 3,46E-02 | Vps8          | 1,17 | Yes |
| ENSMUSG00000033658 | 5,71E-02  | 5,789417458  | 7,23E-01  | 3,95E-01 | 6,96E-01 | Ddx19b        | 1,04 | No  |
| ENSMUSG00000033669 | 1,10E-01  | 2,225000498  | 6,32E-01  | 4,27E-01 | 7,21E-01 | Zfp7          | 1,08 | No  |
| ENSMUSG00000033671 | -9,70E-02 | 7,655050975  | 2,72E+00  | 9,91E-02 | 3,92E-01 | Cep350        | 0,93 | No  |
| ENSMUSG00000033676 | -2,71E+00 | -3,033620915 | 2,92E+00  | 8,75E-02 | 3,78E-01 | Gabrb3        | 0,15 | No  |
| ENSMUSG00000033684 | 2,39E-02  | 5,575355212  | 1,22E-01  | 7,27E-01 | 9,19E-01 | Qsox1         | 1,02 | No  |
| ENSMUSG00000033685 | 1,83E-01  | 10,15000228  | 1,06E+01  | 1,11E-03 | 1,76E-02 | Ucp2          | 1,14 | Yes |
| ENSMUSG00000033688 | 7,45E-01  | -2,832031801 | 3,02E-01  | 5,83E-01 | 8,38E-01 | 1300017J02Rik | 1,68 | No  |
| ENSMUSG00000033697 | 2,78E-01  | 5,174193716  | 1,47E+01  | 1,29E-04 | 3,01E-03 | Arhgap39      | 1,21 | Yes |
| ENSMUSG00000033701 | -6,44E-03 | 4,602045681  | 6,67E-03  | 9,35E-01 | 1,00E+00 | Acbd6         | 1,00 | No  |
| ENSMUSG00000033703 | 1,80E-02  | 3,408538761  | 3,20E-02  | 8,58E-01 | 9,94E-01 | Fuk           | 1,01 | No  |
| ENSMUSG00000033705 | 2,41E-01  | 7,132447863  | 1,59E+01  | 6,55E-05 | 1,70E-03 | Stard9        | 1,18 | Yes |
| ENSMUSG00000033706 | 1,89E-01  | 4,598769884  | 5,72E+00  | 1,68E-02 | 1,35E-01 | Smyd5         | 1,14 | No  |
| ENSMUSG00000033707 | 4,37E-02  | 2,91626824   | 1,45E-01  | 7,03E-01 | 9,06E-01 | Lrrc24        | 1,03 | No  |
| ENSMUSG00000033712 | 7,29E-04  | 5,753915573  | 1,18E-04  | 9,91E-01 | 1,00E+00 | Ccar2         | 1,00 | No  |
| ENSMUSG00000033713 | -4,76E-02 | 4,932256879  | 3,99E-01  | 5,27E-01 | 8,04E-01 | Foxn3         | 0,97 | No  |
| ENSMUSG00000033715 | -1,90E+00 | -3,033594154 | 1,44E+00  | 2,30E-01 | 5,50E-01 | Akr1c14       | 0,27 | No  |
| ENSMUSG00000033717 | 8,64E-02  | 6,099326315  | 1,80E+00  | 1,80E-01 | 5,42E-01 | Adra2a        | 1,06 | No  |
| ENSMUSG00000033720 | 1,84E-01  | 2,791248175  | 2,38E+00  | 1,23E-01 | 4,38E-01 | Sfxn5         | 1,14 | No  |
| ENSMUSG00000033721 | -1,09E-01 | 4,636655911  | 1,93E+00  | 1,65E-01 | 5,16E-01 | Vav3          | 0,93 | No  |

|                    |           |              |           |          |          |               |      |     |
|--------------------|-----------|--------------|-----------|----------|----------|---------------|------|-----|
| ENSMUSG00000033722 | 5,01E-01  | -1,333195733 | 7,76E-01  | 3,78E-01 | 6,79E-01 | BC034090      | 1,42 | No  |
| ENSMUSG00000033728 | 7,78E-02  | 4,358817447  | 9,04E-01  | 3,42E-01 | 6,42E-01 | Lrrc14        | 1,06 | No  |
| ENSMUSG00000033730 | -2,21E-01 | 5,863698093  | 1,03E+01  | 1,36E-03 | 2,07E-02 | Egr3          | 0,86 | Yes |
| ENSMUSG00000033731 | 2,63E+00  | -2,9293308   | 2,68E+00  | 1,02E-01 | 3,94E-01 | 3300002A11Rik | 6,20 | No  |
| ENSMUSG00000033732 | 6,89E-02  | 7,18074318   | 1,31E+00  | 2,52E-01 | 5,50E-01 | Sf3b3         | 1,05 | No  |
| ENSMUSG00000033735 | -1,57E-01 | 5,56023011   | 5,30E+00  | 2,13E-02 | 1,57E-01 | Spr           | 0,90 | No  |
| ENSMUSG00000033739 | 2,13E-02  | 2,247876267  | 2,48E-02  | 8,75E-01 | 1,00E+00 | Fkbp1         | 1,01 | No  |
| ENSMUSG00000033740 | 6,78E-02  | 3,000502858  | 3,49E-01  | 5,55E-01 | 8,20E-01 | St18          | 1,05 | No  |
| ENSMUSG00000033751 | -7,72E-02 | 4,714648003  | 9,98E-01  | 3,18E-01 | 6,18E-01 | Gadd45gip1    | 0,95 | No  |
| ENSMUSG00000033752 | 1,77E-01  | -1,278746789 | 1,28E-01  | 7,21E-01 | 9,16E-01 | Mnd1          | 1,13 | No  |
| ENSMUSG00000033760 | -2,20E-01 | 4,39296465   | 7,37E+00  | 6,62E-03 | 6,89E-02 | Rbm4b         | 0,86 | No  |
| ENSMUSG00000033762 | 2,05E-01  | 3,341452408  | 3,80E+00  | 5,12E-02 | 2,75E-01 | Recql4        | 1,15 | No  |
| ENSMUSG00000033763 | -1,84E-01 | 1,644428135  | 1,28E+00  | 2,59E-01 | 5,51E-01 | Mtss1l        | 0,88 | No  |
| ENSMUSG00000033765 | 2,46E-01  | -1,740914261 | 1,40E-01  | 7,08E-01 | 9,09E-01 | Calm4         | 1,19 | No  |
| ENSMUSG00000033767 | -5,05E-01 | 7,22899015   | 7,09E+01  | 3,75E-17 | 7,02E-15 | Tmem131l      | 0,70 | Yes |
| ENSMUSG00000033768 | 7,10E-01  | 0,348221259  | 6,77E+00  | 9,25E-03 | 8,81E-02 | Nrxn2         | 1,64 | No  |
| ENSMUSG00000033769 | -5,37E-02 | 4,731610381  | 4,88E-01  | 4,85E-01 | 7,72E-01 | Exoc6b        | 0,96 | No  |
| ENSMUSG00000033770 | -1,94E+00 | -3,107619243 | 1,50E+00  | 2,21E-01 | 5,50E-01 | Clnka         | 0,26 | No  |
| ENSMUSG00000033773 | -1,76E-01 | 3,516278613  | 3,24E+00  | 7,19E-02 | 3,40E-01 | Rpap2         | 0,89 | No  |
| ENSMUSG00000033781 | -2,02E-02 | 3,486470194  | 4,14E-02  | 8,39E-01 | 9,82E-01 | Asb13         | 0,99 | No  |
| ENSMUSG00000033788 | -8,94E-01 | -2,20576704  | 1,07E+00  | 3,02E-01 | 5,98E-01 | Dysf          | 0,54 | No  |
| ENSMUSG00000033790 | 3,57E-01  | 4,698640584  | 2,13E+01  | 3,85E-06 | 1,45E-04 | Tubgcp5       | 1,28 | Yes |
| ENSMUSG00000033793 | 3,77E-02  | 6,259154398  | 3,47E-01  | 5,56E-01 | 8,21E-01 | Atp6v1h       | 1,03 | No  |
| ENSMUSG00000033794 | 1,81E+00  | -3,10765737  | 1,28E+00  | 2,58E-01 | 5,50E-01 | Lpcat2b       | 3,49 | No  |
| ENSMUSG00000033799 | 8,43E-03  | 5,230185762  | 1,39E-02  | 9,06E-01 | 1,00E+00 | Fam208b       | 1,01 | No  |
| ENSMUSG00000033805 | -5,99E-02 | -2,963282181 | -7,02E-11 | 1,00E+00 | 1,00E+00 | Ephx4         | 0,96 | No  |
| ENSMUSG00000033808 | 8,71E-02  | 4,906532526  | 1,35E+00  | 2,45E-01 | 5,50E-01 | Tmem87a       | 1,06 | No  |
| ENSMUSG00000033809 | 2,53E-01  | 4,047575037  | 8,19E+00  | 4,21E-03 | 4,91E-02 | Alg3          | 1,19 | Yes |
| ENSMUSG00000033813 | -1,29E-01 | 5,458452639  | 3,42E+00  | 6,43E-02 | 3,17E-01 | Tcea1         | 0,91 | No  |
| ENSMUSG00000033819 | -7,85E-02 | 4,796933309  | 1,07E+00  | 3,02E-01 | 5,98E-01 | Ppp1r16a      | 0,95 | No  |
| ENSMUSG00000033826 | 5,06E-01  | -2,289538269 | 3,90E-01  | 5,32E-01 | 8,06E-01 | Dnah8         | 1,42 | No  |
| ENSMUSG00000033837 | -1,74E-02 | -2,831976759 | 1,74E-04  | 9,89E-01 | 1,00E+00 | Foxh1         | 0,99 | No  |

|                    |           |              |          |          |          |            |      |     |
|--------------------|-----------|--------------|----------|----------|----------|------------|------|-----|
| ENSMUSG00000033845 | 8,21E-02  | 4,946603482  | 1,21E+00 | 2,71E-01 | 5,67E-01 | Mrpl15     | 1,06 | No  |
| ENSMUSG00000033847 | -7,89E-02 | -0,69750995  | 4,93E-02 | 8,24E-01 | 9,73E-01 | Pla2g4c    | 0,95 | No  |
| ENSMUSG00000033849 | 1,35E-01  | 2,379998947  | 9,25E-01 | 3,36E-01 | 6,37E-01 | B3galt2    | 1,10 | No  |
| ENSMUSG00000033852 | 2,78E-01  | 2,480723614  | 4,67E+00 | 3,07E-02 | 2,02E-01 | Gm28042    | 1,21 | No  |
| ENSMUSG00000033854 | 1,33E+00  | -2,268161136 | 1,81E+00 | 1,79E-01 | 5,39E-01 | Kcnk10     | 2,51 | No  |
| ENSMUSG00000033855 | -9,34E-01 | 0,569402515  | 1,54E+01 | 8,64E-05 | 2,15E-03 | Ston1      | 0,52 | Yes |
| ENSMUSG00000033857 | 2,30E-01  | 2,908113105  | 4,02E+00 | 4,50E-02 | 2,53E-01 | Engase     | 1,17 | No  |
| ENSMUSG00000033862 | 3,55E-02  | 4,076275983  | 1,68E-01 | 6,82E-01 | 8,94E-01 | Cdk10      | 1,02 | No  |
| ENSMUSG00000033863 | 2,83E-01  | 5,846809057  | 1,80E+01 | 2,26E-05 | 6,92E-04 | Klf9       | 1,22 | Yes |
| ENSMUSG00000033871 | 1,42E-01  | 4,532172367  | 3,07E+00 | 7,99E-02 | 3,62E-01 | Ppargc1b   | 1,10 | No  |
| ENSMUSG00000033872 | -6,85E-02 | -2,896124416 | 3,23E-03 | 9,55E-01 | 1,00E+00 | Best4-ps   | 0,95 | No  |
| ENSMUSG00000033880 | 8,66E-02  | 8,345377243  | 2,26E+00 | 1,33E-01 | 4,59E-01 | Lgals3bp   | 1,06 | No  |
| ENSMUSG00000033883 | -3,57E-03 | 3,481068837  | 1,29E-03 | 9,71E-01 | 1,00E+00 | D3Ertd254e | 1,00 | No  |
| ENSMUSG00000033885 | -5,10E-02 | 4,94688023   | 4,65E-01 | 4,95E-01 | 7,81E-01 | Pxk        | 0,97 | No  |
| ENSMUSG00000033898 | -2,54E+00 | -2,770550806 | 3,90E+00 | 4,83E-02 | 2,64E-01 | Cfhr2      | 0,17 | No  |
| ENSMUSG00000033900 | 2,56E-01  | -1,963344626 | 1,35E-01 | 7,13E-01 | 9,11E-01 | Map9       | 1,19 | No  |
| ENSMUSG00000033902 | 3,31E-03  | 4,54637056   | 1,74E-03 | 9,67E-01 | 1,00E+00 | Mapkbp1    | 1,00 | No  |
| ENSMUSG00000033904 | 7,40E-02  | 3,593398644  | 5,83E-01 | 4,45E-01 | 7,36E-01 | Ccp110     | 1,05 | No  |
| ENSMUSG00000033909 | 7,27E-02  | 4,875258358  | 9,20E-01 | 3,38E-01 | 6,38E-01 | Usp36      | 1,05 | No  |
| ENSMUSG00000033910 | 4,30E-01  | -2,548281644 | 1,45E-01 | 7,04E-01 | 9,06E-01 | Gucy1a3    | 1,35 | No  |
| ENSMUSG00000033916 | -6,65E-02 | 6,094614051  | 1,05E+00 | 3,05E-01 | 6,02E-01 | Chmp2a     | 0,95 | No  |
| ENSMUSG00000033917 | 6,72E-02  | 5,646902546  | 9,77E-01 | 3,23E-01 | 6,23E-01 | Gde1       | 1,05 | No  |
| ENSMUSG00000033918 | -5,49E-02 | 5,192698481  | 5,83E-01 | 4,45E-01 | 7,36E-01 | Parl       | 0,96 | No  |
| ENSMUSG00000033931 | 1,03E-02  | 4,152027329  | 1,42E-02 | 9,05E-01 | 1,00E+00 | Rbm34      | 1,01 | No  |
| ENSMUSG00000033933 | -1,31E-01 | 6,651044264  | 4,49E+00 | 3,41E-02 | 2,18E-01 | Vhl        | 0,91 | No  |
| ENSMUSG00000033938 | 4,10E-03  | 5,870242099  | 3,81E-03 | 9,51E-01 | 1,00E+00 | Ndufb7     | 1,00 | No  |
| ENSMUSG00000033940 | -8,64E-02 | 7,234250889  | 2,08E+00 | 1,49E-01 | 4,90E-01 | Brk1       | 0,94 | No  |
| ENSMUSG00000033943 | 4,80E-02  | 6,899399936  | 6,20E-01 | 4,31E-01 | 7,25E-01 | Mga        | 1,03 | No  |
| ENSMUSG00000033948 | -1,53E+00 | -2,226218715 | 3,39E+00 | 6,56E-02 | 3,21E-01 | Zswim5     | 0,35 | No  |
| ENSMUSG00000033949 | 3,10E-01  | 5,408773985  | 1,97E+01 | 8,99E-06 | 3,05E-04 | Trim36     | 1,24 | Yes |
| ENSMUSG00000033952 | 3,46E-01  | 4,987251758  | 2,22E+01 | 2,50E-06 | 9,81E-05 | Aspm       | 1,27 | Yes |
| ENSMUSG00000033953 | 1,31E-02  | 7,615839755  | 4,95E-02 | 8,24E-01 | 9,73E-01 | Ppp3r1     | 1,01 | No  |

|                    |           |              |          |          |          |               |      |     |
|--------------------|-----------|--------------|----------|----------|----------|---------------|------|-----|
| ENSMUSG00000033955 | -8,19E-02 | 3,869301082  | 7,98E-01 | 3,72E-01 | 6,73E-01 | Tnks1bp1      | 0,94 | No  |
| ENSMUSG00000033960 | -1,30E-01 | 5,166522385  | 3,31E+00 | 6,88E-02 | 3,30E-01 | Jcad          | 0,91 | No  |
| ENSMUSG00000033961 | 1,16E-01  | 2,043209855  | 6,40E-01 | 4,24E-01 | 7,18E-01 | Zfp446        | 1,08 | No  |
| ENSMUSG00000033963 | -2,17E-01 | -1,34430162  | 1,80E-01 | 6,72E-01 | 8,89E-01 | Fancd2os      | 0,86 | No  |
| ENSMUSG00000033964 | -2,77E-02 | 4,277205854  | 1,08E-01 | 7,42E-01 | 9,27E-01 | Zbtb41        | 0,98 | No  |
| ENSMUSG00000033966 | -1,87E-01 | -0,912663622 | 1,97E-01 | 6,57E-01 | 8,81E-01 | Cdkl4         | 0,88 | No  |
| ENSMUSG00000033967 | -1,36E-01 | 0,148341432  | 2,06E-01 | 6,50E-01 | 8,76E-01 | Rnf225        | 0,91 | No  |
| ENSMUSG00000033970 | -2,03E-01 | 3,836175383  | 4,89E+00 | 2,70E-02 | 1,85E-01 | Rfc3          | 0,87 | No  |
| ENSMUSG00000033972 | -9,21E-02 | 3,953709705  | 1,06E+00 | 3,02E-01 | 5,99E-01 | Zfp944        | 0,94 | No  |
| ENSMUSG00000033983 | 2,88E-03  | 3,006077091  | 6,64E-04 | 9,79E-01 | 1,00E+00 | Coil          | 1,00 | No  |
| ENSMUSG00000033985 | 3,55E-02  | 3,734561709  | 1,41E-01 | 7,07E-01 | 9,08E-01 | Tesk2         | 1,02 | No  |
| ENSMUSG00000033987 | 2,03E-01  | 3,803619627  | 4,63E+00 | 3,14E-02 | 2,05E-01 | Dnah17        | 1,15 | No  |
| ENSMUSG00000033991 | 1,43E-01  | 4,500906351  | 3,14E+00 | 7,66E-02 | 3,53E-01 | Ttc37         | 1,10 | No  |
| ENSMUSG00000034006 | 2,76E-01  | 5,180032161  | 1,47E+01 | 1,25E-04 | 2,94E-03 | Pqlc1         | 1,21 | Yes |
| ENSMUSG00000034007 | -1,66E-01 | 3,770813454  | 3,23E+00 | 7,24E-02 | 3,41E-01 | Scaper        | 0,89 | No  |
| ENSMUSG00000034009 | -1,13E-01 | -2,963254935 | 5,86E-03 | 9,39E-01 | 1,00E+00 | Rxfp1         | 0,92 | No  |
| ENSMUSG00000034021 | 5,69E-02  | 5,202618206  | 6,30E-01 | 4,27E-01 | 7,21E-01 | Pds5b         | 1,04 | No  |
| ENSMUSG00000034022 | 2,19E-02  | 6,246832145  | 1,17E-01 | 7,32E-01 | 9,23E-01 | Cpsf1         | 1,02 | No  |
| ENSMUSG00000034023 | 2,77E-01  | 3,899675251  | 9,11E+00 | 2,54E-03 | 3,37E-02 | Fancd2        | 1,21 | Yes |
| ENSMUSG00000034024 | -3,96E-02 | 7,354147563  | 4,42E-01 | 5,06E-01 | 7,91E-01 | Cct2          | 0,97 | No  |
| ENSMUSG00000034028 | 6,83E-01  | 1,163520225  | 1,12E+01 | 8,18E-04 | 1,37E-02 | Cd226         | 1,61 | Yes |
| ENSMUSG00000034032 | 1,10E-01  | 5,095280069  | 2,28E+00 | 1,31E-01 | 4,54E-01 | Rpap1         | 1,08 | No  |
| ENSMUSG00000034035 | -4,59E-01 | 1,688431228  | 7,56E+00 | 5,96E-03 | 6,38E-02 | Ccdc17        | 0,73 | No  |
| ENSMUSG00000034037 | -1,45E+00 | -0,267822024 | 2,27E+01 | 1,87E-06 | 7,65E-05 | Fgd5          | 0,37 | Yes |
| ENSMUSG00000034039 | -1,89E+00 | -3,1076441   | 1,42E+00 | 2,33E-01 | 5,50E-01 | Prss29        | 0,27 | No  |
| ENSMUSG00000034041 | 4,23E-01  | 2,921048051  | 1,30E+01 | 3,18E-04 | 6,36E-03 | Lyl1          | 1,34 | Yes |
| ENSMUSG00000034042 | -3,90E-03 | 5,735089176  | 3,39E-03 | 9,54E-01 | 1,00E+00 | Gpbp1l1       | 1,00 | No  |
| ENSMUSG00000034059 | 7,93E-01  | -2,548257236 | 5,47E-01 | 4,60E-01 | 7,49E-01 | Ypel4         | 1,73 | No  |
| ENSMUSG00000034063 | -6,87E-03 | -0,117089032 | 5,12E-04 | 9,82E-01 | 1,00E+00 | 4930590J08Rik | 1,00 | No  |
| ENSMUSG00000034064 | -4,30E-01 | 6,435573687  | 4,69E+01 | 7,50E-12 | 8,05E-10 | Poglut1       | 0,74 | Yes |
| ENSMUSG00000034066 | 1,85E-01  | 2,995656834  | 2,65E+00 | 1,03E-01 | 3,95E-01 | Farp2         | 1,14 | No  |
| ENSMUSG00000034071 | 7,11E-02  | -0,755651689 | 3,82E-02 | 8,45E-01 | 9,86E-01 | Zfp551        | 1,05 | No  |

|                    |           |              |           |          |          |               |      |     |
|--------------------|-----------|--------------|-----------|----------|----------|---------------|------|-----|
| ENSMUSG00000034075 | 7,80E-02  | 7,21439002   | 1,69E+00  | 1,94E-01 | 5,50E-01 | Zdhhc5        | 1,06 | No  |
| ENSMUSG00000034083 | 1,34E-02  | 3,804675506  | 2,09E-02  | 8,85E-01 | 1,00E+00 | Ccdc174       | 1,01 | No  |
| ENSMUSG00000034088 | 3,37E-02  | 8,300180512  | 3,42E-01  | 5,59E-01 | 8,22E-01 | Hdlbp         | 1,02 | No  |
| ENSMUSG00000034101 | 1,60E-01  | 6,713669766  | 6,74E+00  | 9,41E-03 | 8,92E-02 | Ctnnd1        | 1,12 | No  |
| ENSMUSG00000034105 | 1,08E-01  | 3,920285518  | 1,46E+00  | 2,27E-01 | 5,50E-01 | Tldc1         | 1,08 | No  |
| ENSMUSG00000034107 | -5,37E-01 | -1,185451267 | 1,26E+00  | 2,61E-01 | 5,54E-01 | Ano7          | 0,69 | No  |
| ENSMUSG00000034108 | 8,40E-03  | 3,77876255   | 8,27E-03  | 9,28E-01 | 1,00E+00 | Ccs           | 1,01 | No  |
| ENSMUSG00000034109 | 2,03E-01  | 4,483654301  | 6,30E+00  | 1,20E-02 | 1,07E-01 | Golim4        | 1,15 | No  |
| ENSMUSG00000034110 | 1,50E-01  | 3,256779894  | 2,04E+00  | 1,53E-01 | 4,96E-01 | Kctd7         | 1,11 | No  |
| ENSMUSG00000034111 | 1,19E-01  | 5,521774622  | 2,99E+00  | 8,39E-02 | 3,71E-01 | Tmed8         | 1,09 | No  |
| ENSMUSG00000034112 | 8,30E-01  | -2,548222695 | 5,99E-01  | 4,39E-01 | 7,31E-01 | Atp2c2        | 1,78 | No  |
| ENSMUSG00000034115 | 3,14E-02  | -3,107617333 | -7,69E-10 | 1,00E+00 | 1,00E+00 | Scn11a        | 1,02 | No  |
| ENSMUSG00000034116 | 7,69E-02  | 6,546541893  | 1,51E+00  | 2,19E-01 | 5,50E-01 | Vav1          | 1,05 | No  |
| ENSMUSG00000034117 | -2,22E-01 | 1,222011538  | 1,31E+00  | 2,53E-01 | 5,50E-01 | Ptgdr2        | 0,86 | No  |
| ENSMUSG00000034118 | 1,84E-01  | 4,086165755  | 4,43E+00  | 3,53E-02 | 2,22E-01 | Tpst1         | 1,14 | No  |
| ENSMUSG00000034120 | 1,68E-01  | 7,918504221  | 8,30E+00  | 3,96E-03 | 4,71E-02 | Srsf2         | 1,12 | Yes |
| ENSMUSG00000034121 | 2,39E-02  | 2,894538097  | 4,17E-02  | 8,38E-01 | 9,82E-01 | Mks1          | 1,02 | No  |
| ENSMUSG00000034126 | 1,50E-01  | 3,495540026  | 2,22E+00  | 1,36E-01 | 4,65E-01 | Pomt2         | 1,11 | No  |
| ENSMUSG00000034127 | -1,44E-01 | 0,732245259  | 3,68E-01  | 5,44E-01 | 8,13E-01 | Tspan8        | 0,90 | No  |
| ENSMUSG00000034135 | -2,32E-01 | 6,174364782  | 1,29E+01  | 3,20E-04 | 6,39E-03 | Sik3          | 0,85 | Yes |
| ENSMUSG00000034139 | 7,25E-01  | -2,896157085 | 2,86E-01  | 5,93E-01 | 8,42E-01 | Serpini2      | 1,65 | No  |
| ENSMUSG00000034145 | 9,01E-03  | -3,107646452 | -5,16E-10 | 1,00E+00 | 1,00E+00 | Tmem63c       | 1,01 | No  |
| ENSMUSG00000034152 | -8,51E-02 | 6,250377692  | 1,77E+00  | 1,84E-01 | 5,47E-01 | Exoc3         | 0,94 | No  |
| ENSMUSG00000034154 | 9,45E-02  | 5,697267635  | 1,95E+00  | 1,62E-01 | 5,12E-01 | Ino80         | 1,07 | No  |
| ENSMUSG00000034156 | -4,93E-01 | 7,866173844  | 7,12E+01  | 3,24E-17 | 6,18E-15 | Tspoap1       | 0,71 | Yes |
| ENSMUSG00000034157 | 3,31E-02  | 4,880330974  | 1,95E-01  | 6,59E-01 | 8,81E-01 | Cipc          | 1,02 | No  |
| ENSMUSG00000034158 | -8,19E-02 | 8,516869445  | 2,04E+00  | 1,54E-01 | 4,97E-01 | Lrrc58        | 0,94 | No  |
| ENSMUSG00000034159 | -3,83E-02 | -3,107651936 | -7,91E-11 | 1,00E+00 | 1,00E+00 | 2310007B03Rik | 0,97 | No  |
| ENSMUSG00000034161 | -1,30E-01 | -0,697296879 | 1,12E-01  | 7,37E-01 | 9,25E-01 | Scx           | 0,91 | No  |
| ENSMUSG00000034163 | -4,63E-01 | 6,59395906   | 5,54E+01  | 9,64E-14 | 1,33E-11 | Zfc3h1        | 0,73 | Yes |
| ENSMUSG00000034164 | -3,53E+00 | -2,896127731 | 5,59E+00  | 1,81E-02 | 1,41E-01 | Emid1         | 0,09 | No  |
| ENSMUSG00000034165 | 4,63E-02  | 7,134687098  | 5,90E-01  | 4,42E-01 | 7,34E-01 | Ccnd3         | 1,03 | No  |



|                    |           |              |          |          |          |          |       |      |     |
|--------------------|-----------|--------------|----------|----------|----------|----------|-------|------|-----|
| ENSMUSG00000034168 | 2,50E-01  | 4,894983666  | 1,08E+01 | 1,03E-03 | 1,65E-02 | Irf2bpl  |       | 1,19 | Yes |
| ENSMUSG00000034171 | -1,57E-01 | 0,966612342  | 5,74E-01 | 4,49E-01 | 7,39E-01 | Faah     |       | 0,90 | No  |
| ENSMUSG00000034173 | 8,63E-02  | 4,210317041  | 1,05E+00 | 3,06E-01 | 6,04E-01 | Zbed5    |       | 1,06 | No  |
| ENSMUSG00000034175 | 6,13E-02  | 3,587680527  | 3,96E-01 | 5,29E-01 | 8,05E-01 | Rhbdd3   |       | 1,04 | No  |
| ENSMUSG00000034177 | -1,22E-01 | 2,076891384  | 7,22E-01 | 3,96E-01 | 6,96E-01 | Rnf43    |       | 0,92 | No  |
| ENSMUSG00000034187 | 8,63E-02  | 6,735857029  | 1,95E+00 | 1,62E-01 | 5,12E-01 | Nsf      |       | 1,06 | No  |
| ENSMUSG00000034189 | 6,76E-02  | 5,748151049  | 1,02E+00 | 3,12E-01 | 6,12E-01 | Hsd1l    |       | 1,05 | No  |
| ENSMUSG00000034190 | 1,12E-01  | 5,357311321  | 2,55E+00 | 1,10E-01 | 4,07E-01 | Chmp7    |       | 1,08 | No  |
| ENSMUSG00000034192 | -4,66E-02 | 3,957380243  | 2,66E-01 | 6,06E-01 | 8,50E-01 | Lsm3     |       | 0,97 | No  |
| ENSMUSG00000034194 | 1,34E-01  | 2,777333442  | 1,22E+00 | 2,69E-01 | 5,65E-01 | R3hcc1   |       | 1,10 | No  |
| ENSMUSG00000034201 | -9,23E-02 | 5,681256344  | 1,86E+00 | 1,73E-01 | 5,30E-01 | Gas2l1   |       | 0,94 | No  |
| ENSMUSG00000034203 | -2,46E-02 | 4,390165867  | 8,88E-02 | 7,66E-01 | 9,40E-01 | Chchd4   |       | 0,98 | No  |
| ENSMUSG00000034205 | -1,54E-01 | -0,954576655 | 1,39E-01 | 7,09E-01 | 9,09E-01 | Loxl2    |       | 0,90 | No  |
| ENSMUSG00000034206 | 2,04E-01  | 4,240346485  | 5,84E+00 | 1,57E-02 | 1,30E-01 | Polq     |       | 1,15 | No  |
| ENSMUSG00000034209 | -9,09E-01 | -1,535222177 | 2,03E+00 | 1,54E-01 | 4,97E-01 | Ras10a   |       | 0,53 | No  |
| ENSMUSG00000034210 | 4,30E-02  | 5,436558347  | 3,83E-01 | 5,36E-01 | 8,08E-01 | Efcab14  |       | 1,03 | No  |
| ENSMUSG00000034211 | 5,89E-02  | 5,210173913  | 6,73E-01 | 4,12E-01 | 7,08E-01 | Mrps17   |       | 1,04 | No  |
| ENSMUSG00000034212 | -6,16E-01 | 2,478752004  | 2,28E+01 | 1,82E-06 | 7,50E-05 | Ankmy1   |       | 0,65 | Yes |
| ENSMUSG00000034216 | 1,87E-01  | 6,717279853  | 9,21E+00 | 2,41E-03 | 3,25E-02 | Vps18    |       | 1,14 | Yes |
| ENSMUSG00000034218 | 2,34E-01  | 5,044247495  | 1,01E+01 | 1,51E-03 | 2,24E-02 | Atm      |       | 1,18 | Yes |
| ENSMUSG00000034219 | -1,87E+00 | -3,107637761 | 1,39E+00 | 2,38E-01 | 5,50E-01 |          | 41883 | 0,27 | No  |
| ENSMUSG00000034220 | -6,61E-01 | 6,741573049  | 1,15E+02 | 9,19E-27 | 3,72E-24 | Gpc1     |       | 0,63 | Yes |
| ENSMUSG00000034226 | -5,39E-02 | 3,199955204  | 2,37E-01 | 6,26E-01 | 8,60E-01 | Rhov     |       | 0,96 | No  |
| ENSMUSG00000034227 | -6,91E-01 | -1,015789131 | 2,90E+00 | 8,88E-02 | 3,79E-01 | Foxj1    |       | 0,62 | No  |
| ENSMUSG00000034235 | 1,25E-02  | 3,145349724  | 1,30E-02 | 9,09E-01 | 1,00E+00 | Usp54    |       | 1,01 | No  |
| ENSMUSG00000034243 | 1,01E-02  | 7,389953008  | 2,91E-02 | 8,64E-01 | 9,98E-01 | Golgb1   |       | 1,01 | No  |
| ENSMUSG00000034245 | -1,01E-01 | -0,655110762 | 7,08E-02 | 7,90E-01 | 9,54E-01 | Hdac11   |       | 0,93 | No  |
| ENSMUSG00000034247 | 2,11E-01  | 6,673285217  | 1,16E+01 | 6,53E-04 | 1,14E-02 | Plekhm1  |       | 1,16 | Yes |
| ENSMUSG00000034248 | 8,27E-02  | 5,400105949  | 1,40E+00 | 2,37E-01 | 5,50E-01 | Slc25a37 |       | 1,06 | No  |
| ENSMUSG00000034252 | -1,02E-01 | 5,90672859   | 2,36E+00 | 1,24E-01 | 4,41E-01 | Senp6    |       | 0,93 | No  |
| ENSMUSG00000034254 | 4,11E-02  | 6,226592021  | 4,11E-01 | 5,21E-01 | 8,00E-01 | Agpat1   |       | 1,03 | No  |
| ENSMUSG00000034255 | 1,66E-01  | 5,688923979  | 6,06E+00 | 1,38E-02 | 1,19E-01 | Arhgap27 |       | 1,12 | No  |

|                    |           |              |          |          |          |          |      |     |
|--------------------|-----------|--------------|----------|----------|----------|----------|------|-----|
| ENSMUSG00000034258 | 3,08E-02  | 0,55149469   | 1,44E-02 | 9,05E-01 | 1,00E+00 | Mfsd7c   | 1,02 | No  |
| ENSMUSG00000034259 | -5,43E-02 | 4,014974149  | 3,74E-01 | 5,41E-01 | 8,11E-01 | Exosc4   | 0,96 | No  |
| ENSMUSG00000034263 | -1,35E-02 | 4,97194771   | 3,27E-02 | 8,56E-01 | 9,93E-01 | Ints14   | 0,99 | No  |
| ENSMUSG00000034265 | -1,30E-02 | 4,230535244  | 2,35E-02 | 8,78E-01 | 1,00E+00 | Zdhhc14  | 0,99 | No  |
| ENSMUSG00000034266 | 7,83E-02  | 3,877800543  | 7,36E-01 | 3,91E-01 | 6,91E-01 | Batf     | 1,06 | No  |
| ENSMUSG00000034269 | 1,46E-02  | 7,349083567  | 5,96E-02 | 8,07E-01 | 9,64E-01 | Setd5    | 1,01 | No  |
| ENSMUSG00000034271 | 1,45E-01  | 3,36126828   | 2,02E+00 | 1,56E-01 | 5,00E-01 | Jdp2     | 1,11 | No  |
| ENSMUSG00000034274 | 3,69E-02  | 4,657894187  | 2,23E-01 | 6,37E-01 | 8,68E-01 | Thoc5    | 1,03 | No  |
| ENSMUSG00000034275 | -1,92E-01 | 0,183611887  | 5,35E-01 | 4,65E-01 | 7,53E-01 | Igsf9b   | 0,88 | No  |
| ENSMUSG00000034278 | -2,63E-01 | 1,396121378  | 2,05E+00 | 1,53E-01 | 4,95E-01 | Dnajc17  | 0,83 | No  |
| ENSMUSG00000034282 | -1,55E-01 | -1,126713801 | 1,16E-01 | 7,34E-01 | 9,23E-01 | Evpl     | 0,90 | No  |
| ENSMUSG00000034285 | -5,33E-01 | 3,202973355  | 2,50E+01 | 5,80E-07 | 2,72E-05 | Nipsnap1 | 0,69 | Yes |
| ENSMUSG00000034290 | 6,08E-02  | 7,266244891  | 1,03E+00 | 3,10E-01 | 6,09E-01 | Nek9     | 1,04 | No  |
| ENSMUSG00000034292 | 3,34E-01  | 2,094812559  | 5,20E+00 | 2,26E-02 | 1,64E-01 | Traf3ip1 | 1,26 | No  |
| ENSMUSG00000034295 | -3,66E-01 | 0,317179726  | 2,10E+00 | 1,48E-01 | 4,87E-01 | Fhod3    | 0,78 | No  |
| ENSMUSG00000034297 | 7,70E-03  | 6,870655564  | 1,59E-02 | 9,00E-01 | 1,00E+00 | Med13    | 1,01 | No  |
| ENSMUSG00000034300 | 1,01E-01  | 5,708479729  | 2,27E+00 | 1,32E-01 | 4,57E-01 | Fam53c   | 1,07 | No  |
| ENSMUSG00000034303 | 1,19E-01  | 1,50412746   | 4,37E-01 | 5,08E-01 | 7,92E-01 | Ccdc15   | 1,09 | No  |
| ENSMUSG00000034308 | 3,16E-01  | 2,392168177  | 5,52E+00 | 1,88E-02 | 1,45E-01 | Sdr42e1  | 1,25 | No  |
| ENSMUSG00000034312 | 1,32E-01  | 7,132128831  | 4,76E+00 | 2,90E-02 | 1,94E-01 | Iqsec1   | 1,10 | No  |
| ENSMUSG00000034317 | 1,74E-02  | 4,0431715    | 3,99E-02 | 8,42E-01 | 9,84E-01 | Trim59   | 1,01 | No  |
| ENSMUSG00000034320 | -2,05E-01 | 6,678946918  | 1,10E+01 | 9,01E-04 | 1,49E-02 | Slc26a2  | 0,87 | Yes |
| ENSMUSG00000034321 | 9,03E-03  | 3,270894476  | 7,34E-03 | 9,32E-01 | 1,00E+00 | Exosc1   | 1,01 | No  |
| ENSMUSG00000034324 | 7,05E-01  | -2,963278876 | 2,69E-01 | 6,04E-01 | 8,49E-01 | Tmem132c | 1,63 | No  |
| ENSMUSG00000034327 | 6,26E-03  | 5,049332909  | 7,38E-03 | 9,32E-01 | 1,00E+00 | Kctd9    | 1,00 | No  |
| ENSMUSG00000034329 | 2,89E-01  | 4,144429101  | 1,12E+01 | 8,27E-04 | 1,38E-02 | Brip1    | 1,22 | Yes |
| ENSMUSG00000034330 | 6,74E-02  | 7,346422534  | 1,27E+00 | 2,60E-01 | 5,52E-01 | Plcg2    | 1,05 | No  |
| ENSMUSG00000034333 | 2,77E-01  | 4,602000471  | 1,25E+01 | 3,96E-04 | 7,57E-03 | Zbed4    | 1,21 | Yes |
| ENSMUSG00000034334 | -1,06E-01 | 1,604558632  | 3,68E-01 | 5,44E-01 | 8,13E-01 | Fam151b  | 0,93 | No  |
| ENSMUSG00000034336 | 8,12E-01  | -2,185667326 | 1,20E+00 | 2,72E-01 | 5,69E-01 | Ina      | 1,76 | No  |
| ENSMUSG00000034341 | 5,93E-02  | 6,641319955  | 9,15E-01 | 3,39E-01 | 6,39E-01 | Wbp2     | 1,04 | No  |
| ENSMUSG00000034342 | -8,06E-02 | 8,968918566  | 2,01E+00 | 1,57E-01 | 5,01E-01 | Cbl      | 0,95 | No  |

|                    |           |              |           |          |          |          |      |     |
|--------------------|-----------|--------------|-----------|----------|----------|----------|------|-----|
| ENSMUSG00000034343 | -8,25E-02 | 5,529086106  | 1,45E+00  | 2,28E-01 | 5,50E-01 | Ube2f    | 0,94 | No  |
| ENSMUSG00000034345 | -2,88E-02 | 4,982443466  | 1,51E-01  | 6,97E-01 | 9,03E-01 | Gtf2h5   | 0,98 | No  |
| ENSMUSG00000034349 | 1,28E-01  | 7,065230352  | 4,46E+00  | 3,46E-02 | 2,20E-01 | Smc4     | 1,09 | No  |
| ENSMUSG00000034353 | 2,36E-01  | 5,830752542  | 1,23E+01  | 4,44E-04 | 8,33E-03 | Ramp1    | 1,18 | Yes |
| ENSMUSG00000034354 | -9,90E-03 | 7,64824506   | 2,82E-02  | 8,67E-01 | 9,99E-01 | Mttr3    | 0,99 | No  |
| ENSMUSG00000034361 | -1,18E-01 | 5,966200684  | 3,23E+00  | 7,22E-02 | 3,41E-01 | Cpne2    | 0,92 | No  |
| ENSMUSG00000034362 | 1,85E+00  | -3,107657832 | 1,35E+00  | 2,46E-01 | 5,50E-01 | Csta1    | 3,61 | No  |
| ENSMUSG00000034371 | -2,84E-02 | 3,698655778  | 9,09E-02  | 7,63E-01 | 9,39E-01 | Tkfc     | 0,98 | No  |
| ENSMUSG00000034377 | 2,40E-02  | 7,419064899  | 1,63E-01  | 6,87E-01 | 8,97E-01 | Tulp4    | 1,02 | No  |
| ENSMUSG00000034379 | 4,58E-02  | 2,116296579  | 1,00E-01  | 7,51E-01 | 9,32E-01 | Wdr5b    | 1,03 | No  |
| ENSMUSG00000034382 | 1,01E-01  | 1,365371123  | 3,08E-01  | 5,79E-01 | 8,36E-01 | Al661453 | 1,07 | No  |
| ENSMUSG00000034384 | 9,01E-03  | -3,107646452 | -5,16E-10 | 1,00E+00 | 1,00E+00 | Barhl2   | 1,01 | No  |
| ENSMUSG00000034390 | -1,66E-01 | 6,541665465  | 7,03E+00  | 8,02E-03 | 7,92E-02 | Cmip     | 0,89 | No  |
| ENSMUSG00000034391 | 1,87E+00  | -3,107639691 | 1,38E+00  | 2,40E-01 | 5,50E-01 | Fbxo15   | 3,67 | No  |
| ENSMUSG00000034394 | -9,64E-01 | 2,232418363  | 4,48E+01  | 2,17E-11 | 2,22E-09 | Lif      | 0,51 | Yes |
| ENSMUSG00000034401 | 1,14E-01  | 4,962221035  | 2,33E+00  | 1,27E-01 | 4,46E-01 | Spata6   | 1,08 | No  |
| ENSMUSG00000034402 | -1,87E+00 | -3,107637761 | 1,39E+00  | 2,38E-01 | 5,50E-01 | Kcnh5    | 0,27 | No  |
| ENSMUSG00000034412 | -2,03E-02 | 4,650220964  | 6,69E-02  | 7,96E-01 | 9,57E-01 | Tbc1d10a | 0,99 | No  |
| ENSMUSG00000034413 | 3,23E-01  | 3,028339223  | 8,60E+00  | 3,37E-03 | 4,17E-02 | Neurl1b  | 1,25 | Yes |
| ENSMUSG00000034416 | -9,41E-02 | -0,079276079 | 8,87E-02  | 7,66E-01 | 9,40E-01 | Pkd1l2   | 0,94 | No  |
| ENSMUSG00000034422 | 7,75E-02  | 6,750612794  | 1,60E+00  | 2,06E-01 | 5,50E-01 | Parp14   | 1,06 | No  |
| ENSMUSG00000034424 | 1,03E-01  | 4,433932837  | 1,56E+00  | 2,11E-01 | 5,50E-01 | Gcsh     | 1,07 | No  |
| ENSMUSG00000034427 | 3,75E-02  | -1,96322517  | 2,68E-03  | 9,59E-01 | 1,00E+00 | Myo15b   | 1,03 | No  |
| ENSMUSG00000034429 | 1,08E-01  | 2,575134537  | 7,26E-01  | 3,94E-01 | 6,94E-01 | Zfp707   | 1,08 | No  |
| ENSMUSG00000034430 | 2,81E-01  | 4,982038902  | 1,45E+01  | 1,37E-04 | 3,14E-03 | Zxdc     | 1,22 | Yes |
| ENSMUSG00000034432 | -2,75E-02 | 5,849145302  | 1,71E-01  | 6,79E-01 | 8,93E-01 | Cops8    | 0,98 | No  |
| ENSMUSG00000034435 | -7,56E-01 | -2,401333048 | 6,41E-01  | 4,24E-01 | 7,18E-01 | Tmem30b  | 0,59 | No  |
| ENSMUSG00000034437 | -1,77E-02 | 6,27587102   | 7,70E-02  | 7,81E-01 | 9,49E-01 | Gm9761   | 0,99 | No  |
| ENSMUSG00000034438 | -2,13E-01 | 5,367982807  | 9,29E+00  | 2,30E-03 | 3,13E-02 | Gbp8     | 0,86 | Yes |
| ENSMUSG00000034442 | 1,05E-01  | 3,376278237  | 1,05E+00  | 3,05E-01 | 6,02E-01 | Trmt5    | 1,08 | No  |
| ENSMUSG00000034445 | -1,97E-01 | 5,790267249  | 8,79E+00  | 3,03E-03 | 3,85E-02 | Cyb561a3 | 0,87 | Yes |
| ENSMUSG00000034449 | -7,25E-02 | 4,468116477  | 7,96E-01  | 3,72E-01 | 6,73E-01 | Dhrs11   | 0,95 | No  |

|                    |           |              |          |          |          |               |      |     |
|--------------------|-----------|--------------|----------|----------|----------|---------------|------|-----|
| ENSMUSG00000034452 | -6,58E-01 | -0,863667517 | 2,09E+00 | 1,48E-01 | 4,88E-01 | Slc24a1       | 0,63 | No  |
| ENSMUSG00000034453 | 1,42E-01  | 4,437098208  | 3,05E+00 | 8,08E-02 | 3,64E-01 | Polr3b        | 1,10 | No  |
| ENSMUSG00000034456 | -7,72E-02 | -1,267951836 | 2,65E-02 | 8,71E-01 | 1,00E+00 | Uroc1         | 0,95 | No  |
| ENSMUSG00000034459 | -3,06E-01 | 2,202162951  | 4,80E+00 | 2,85E-02 | 1,91E-01 | lfit1         | 0,81 | No  |
| ENSMUSG00000034460 | 3,09E-01  | 1,369102362  | 2,37E+00 | 1,24E-01 | 4,40E-01 | Six4          | 1,24 | No  |
| ENSMUSG00000034462 | -1,96E-02 | 4,9045304    | 6,90E-02 | 7,93E-01 | 9,56E-01 | Pkd2          | 0,99 | No  |
| ENSMUSG00000034463 | 3,37E-02  | 0,882888616  | 2,71E-02 | 8,69E-01 | 1,00E+00 | Scara3        | 1,02 | No  |
| ENSMUSG00000034471 | 3,04E-02  | 3,889660545  | 1,13E-01 | 7,37E-01 | 9,25E-01 | Caskin2       | 1,02 | No  |
| ENSMUSG00000034472 | -6,90E-01 | -0,946053387 | 2,88E+00 | 8,96E-02 | 3,80E-01 | Rasd2         | 0,62 | No  |
| ENSMUSG00000034473 | -3,23E-02 | 3,876412792  | 1,28E-01 | 7,21E-01 | 9,16E-01 | Sec22a        | 0,98 | No  |
| ENSMUSG00000034484 | 1,95E-01  | 7,435853761  | 1,07E+01 | 1,08E-03 | 1,72E-02 | Snx2          | 1,14 | Yes |
| ENSMUSG00000034485 | 8,75E-02  | 4,231546588  | 1,06E+00 | 3,03E-01 | 5,99E-01 | Uaca          | 1,06 | No  |
| ENSMUSG00000034486 | 3,90E-01  | -2,424908769 | 1,80E-01 | 6,71E-01 | 8,89E-01 | Gbx2          | 1,31 | No  |
| ENSMUSG00000034487 | 4,05E-02  | 3,065925415  | 1,37E-01 | 7,11E-01 | 9,10E-01 | Kdelc2        | 1,03 | No  |
| ENSMUSG00000034488 | 5,13E-01  | -0,473235311 | 2,24E+00 | 1,35E-01 | 4,62E-01 | Edil3         | 1,43 | No  |
| ENSMUSG00000034493 | 1,94E-01  | 0,627453292  | 6,40E-01 | 4,24E-01 | 7,18E-01 | 4930556J24Rik | 1,14 | No  |
| ENSMUSG00000034501 | 2,48E-01  | 3,419274881  | 5,86E+00 | 1,55E-02 | 1,29E-01 | Pcnx4         | 1,19 | No  |
| ENSMUSG00000034509 | -1,67E-01 | 4,602041943  | 4,49E+00 | 3,41E-02 | 2,18E-01 | Mad2l1bp      | 0,89 | No  |
| ENSMUSG00000034518 | 2,15E-01  | 4,583083899  | 7,43E+00 | 6,42E-03 | 6,74E-02 | Hmgxb4        | 1,16 | No  |
| ENSMUSG00000034520 | -2,93E-01 | -2,185661065 | 1,49E-01 | 7,00E-01 | 9,04E-01 | Gjc1          | 0,82 | No  |
| ENSMUSG00000034522 | 4,49E-01  | 3,096511115  | 1,63E+01 | 5,34E-05 | 1,43E-03 | Zfp395        | 1,37 | Yes |
| ENSMUSG00000034525 | -3,76E-02 | 6,544108496  | 3,63E-01 | 5,47E-01 | 8,14E-01 | Ice1          | 0,97 | No  |
| ENSMUSG00000034528 | -8,69E-01 | -2,963204587 | 4,16E-01 | 5,19E-01 | 7,98E-01 | Hsd17b13      | 0,55 | No  |
| ENSMUSG00000034538 | -2,37E-01 | -0,088678891 | 6,03E-01 | 4,37E-01 | 7,30E-01 | Zfp418        | 0,85 | No  |
| ENSMUSG00000034543 | 1,23E-01  | 5,631277123  | 3,29E+00 | 6,95E-02 | 3,32E-01 | Morc2a        | 1,09 | No  |
| ENSMUSG00000034544 | -6,03E-02 | 4,326954056  | 5,30E-01 | 4,67E-01 | 7,55E-01 | Rsrc1         | 0,96 | No  |
| ENSMUSG00000034552 | -1,87E+00 | -3,107637761 | 1,39E+00 | 2,38E-01 | 5,50E-01 | Zswim2        | 0,27 | No  |
| ENSMUSG00000034557 | 3,40E-03  | 2,287441343  | 5,97E-04 | 9,81E-01 | 1,00E+00 | Zfyve9        | 1,00 | No  |
| ENSMUSG00000034560 | 1,68E-01  | 6,238128837  | 6,92E+00 | 8,54E-03 | 8,31E-02 | Washc4        | 1,12 | No  |
| ENSMUSG00000034563 | -1,61E-02 | 5,167705237  | 4,98E-02 | 8,23E-01 | 9,73E-01 | Ccpg1         | 0,99 | No  |
| ENSMUSG00000034566 | -4,71E-02 | 4,486317112  | 3,43E-01 | 5,58E-01 | 8,22E-01 | Atp5h         | 0,97 | No  |
| ENSMUSG00000034570 | 4,54E-02  | 1,342582603  | 5,85E-02 | 8,09E-01 | 9,65E-01 | Inpp5j        | 1,03 | No  |

|                    |           |              |          |          |          |               |      |     |
|--------------------|-----------|--------------|----------|----------|----------|---------------|------|-----|
| ENSMUSG00000034573 | -1,35E+00 | -2,896129282 | 1,14E+00 | 2,85E-01 | 5,81E-01 | Ptpn13        | 0,39 | No  |
| ENSMUSG00000034574 | -6,93E-02 | 4,409997831  | 7,20E-01 | 3,96E-01 | 6,97E-01 | Daam1         | 0,95 | No  |
| ENSMUSG00000034575 | 1,20E-01  | 5,155747801  | 2,77E+00 | 9,61E-02 | 3,87E-01 | Papd7         | 1,09 | No  |
| ENSMUSG00000034579 | 1,41E-01  | -1,195796021 | 9,71E-02 | 7,55E-01 | 9,34E-01 | Pla2g3        | 1,10 | No  |
| ENSMUSG00000034584 | -1,26E+00 | -1,378161737 | 5,50E+00 | 1,90E-02 | 1,46E-01 | Exph5         | 0,42 | No  |
| ENSMUSG00000034586 | -1,20E+00 | -1,28954812  | 4,88E+00 | 2,72E-02 | 1,86E-01 | Hid1          | 0,44 | No  |
| ENSMUSG00000034587 | -2,22E-02 | 1,991974738  | 2,16E-02 | 8,83E-01 | 1,00E+00 | 8430429K09Rik | 0,98 | No  |
| ENSMUSG00000034591 | 1,58E-01  | 5,4318732    | 5,12E+00 | 2,37E-02 | 1,69E-01 | Slc41a2       | 1,12 | No  |
| ENSMUSG00000034593 | 9,36E-02  | 8,692534834  | 2,68E+00 | 1,02E-01 | 3,94E-01 | Myo5a         | 1,07 | No  |
| ENSMUSG00000034595 | 2,96E-03  | 7,595643499  | 2,51E-03 | 9,60E-01 | 1,00E+00 | Ppp1r18       | 1,00 | No  |
| ENSMUSG00000034601 | 1,16E-01  | 3,6255794    | 1,45E+00 | 2,29E-01 | 5,50E-01 | 2700049A03Rik | 1,08 | No  |
| ENSMUSG00000034602 | 1,09E-01  | 6,603878251  | 3,05E+00 | 8,05E-02 | 3,64E-01 | Mon2          | 1,08 | No  |
| ENSMUSG00000034610 | -1,09E-01 | 4,373483529  | 1,74E+00 | 1,87E-01 | 5,50E-01 | Zcchc11       | 0,93 | No  |
| ENSMUSG00000034612 | 1,93E-02  | 6,973354459  | 1,01E-01 | 7,51E-01 | 9,32E-01 | Chst11        | 1,01 | No  |
| ENSMUSG00000034613 | -9,74E-02 | 6,385646868  | 2,36E+00 | 1,25E-01 | 4,42E-01 | Ppm1h         | 0,93 | No  |
| ENSMUSG00000034614 | 1,80E-01  | 1,959038004  | 1,48E+00 | 2,24E-01 | 5,50E-01 | Pik3ip1       | 1,13 | No  |
| ENSMUSG00000034616 | 3,30E-02  | 6,141520427  | 2,62E-01 | 6,09E-01 | 8,51E-01 | Ssh3          | 1,02 | No  |
| ENSMUSG00000034617 | 7,95E-02  | 3,864539413  | 7,48E-01 | 3,87E-01 | 6,87E-01 | Mtrr          | 1,06 | No  |
| ENSMUSG00000034620 | 8,39E-02  | 4,681129111  | 1,16E+00 | 2,82E-01 | 5,78E-01 | Tmem5         | 1,06 | No  |
| ENSMUSG00000034621 | 4,72E-02  | 5,809744509  | 5,05E-01 | 4,77E-01 | 7,65E-01 | Gpatch8       | 1,03 | No  |
| ENSMUSG00000034634 | -6,93E-02 | -1,711773846 | 1,12E-02 | 9,16E-01 | 1,00E+00 | Ly6d          | 0,95 | No  |
| ENSMUSG00000034636 | 4,05E-02  | 6,167992696  | 3,97E-01 | 5,29E-01 | 8,04E-01 | Zyg11b        | 1,03 | No  |
| ENSMUSG00000034639 | 4,35E-02  | 1,120307964  | 4,70E-02 | 8,28E-01 | 9,76E-01 | Setmar        | 1,03 | No  |
| ENSMUSG00000034640 | -1,76E-01 | 7,019748491  | 8,41E+00 | 3,72E-03 | 4,48E-02 | Tiparp        | 0,89 | Yes |
| ENSMUSG00000034641 | -9,91E-02 | 5,279978036  | 1,92E+00 | 1,66E-01 | 5,19E-01 | Cd300ld       | 0,93 | No  |
| ENSMUSG00000034647 | -9,70E-02 | 5,760053339  | 2,09E+00 | 1,48E-01 | 4,88E-01 | Ankrd12       | 0,93 | No  |
| ENSMUSG00000034652 | 8,14E-02  | 6,476487024  | 1,67E+00 | 1,96E-01 | 5,50E-01 | Cd300a        | 1,06 | No  |
| ENSMUSG00000034653 | 1,67E-01  | 4,483117119  | 4,27E+00 | 3,88E-02 | 2,33E-01 | Ythdc2        | 1,12 | No  |
| ENSMUSG00000034656 | -3,38E-01 | -0,472907408 | 9,45E-01 | 3,31E-01 | 6,31E-01 | Cacna1a       | 0,79 | No  |
| ENSMUSG00000034659 | 1,00E-01  | 6,838391828  | 2,67E+00 | 1,02E-01 | 3,94E-01 | Tmem109       | 1,07 | No  |
| ENSMUSG00000034663 | -3,81E-01 | 7,9676923    | 4,28E+01 | 6,12E-11 | 5,97E-09 | Bmp2k         | 0,77 | Yes |
| ENSMUSG00000034664 | -6,11E-01 | 1,409592513  | 1,13E+01 | 7,64E-04 | 1,30E-02 | Itga2b        | 0,65 | Yes |

|                    |           |              |           |          |          |               |      |     |
|--------------------|-----------|--------------|-----------|----------|----------|---------------|------|-----|
| ENSMUSG00000034667 | 1,78E-01  | 5,652940352  | 6,85E+00  | 8,85E-03 | 8,54E-02 | Xpot          | 1,13 | No  |
| ENSMUSG00000034673 | -1,03E-01 | 5,885109705  | 2,44E+00  | 1,18E-01 | 4,27E-01 | Pbx2          | 0,93 | No  |
| ENSMUSG00000034674 | 9,20E-02  | 4,470216467  | 1,29E+00  | 2,56E-01 | 5,50E-01 | Tdg           | 1,07 | No  |
| ENSMUSG00000034675 | 6,11E-01  | 2,892657357  | 2,57E+01  | 3,92E-07 | 1,91E-05 | Dbn1          | 1,53 | Yes |
| ENSMUSG00000034681 | -5,92E-03 | 5,241213359  | 6,85E-03  | 9,34E-01 | 1,00E+00 | Rnps1         | 1,00 | No  |
| ENSMUSG00000034683 | -3,53E+00 | -2,831995661 | 5,58E+00  | 1,82E-02 | 1,42E-01 | Ppp1r1c       | 0,09 | No  |
| ENSMUSG00000034684 | -2,47E+00 | -2,355553582 | 5,31E+00  | 2,12E-02 | 1,57E-01 | Sema3f        | 0,18 | No  |
| ENSMUSG00000034685 | 3,80E-01  | 0,630500858  | 2,46E+00  | 1,17E-01 | 4,23E-01 | Fam171a2      | 1,30 | No  |
| ENSMUSG00000034686 | -1,53E-01 | 0,86136891   | 4,88E-01  | 4,85E-01 | 7,72E-01 | Prr7          | 0,90 | No  |
| ENSMUSG00000034687 | -2,26E+00 | -2,378202308 | 6,74E+00  | 9,44E-03 | 8,94E-02 | Fras1         | 0,21 | No  |
| ENSMUSG00000034690 | -3,83E-02 | -3,107651936 | -7,91E-11 | 1,00E+00 | 1,00E+00 | Nlrp4c        | 0,97 | No  |
| ENSMUSG00000034701 | -1,53E+00 | -2,863717471 | 1,53E+00  | 2,16E-01 | 5,50E-01 | Neurod1       | 0,35 | No  |
| ENSMUSG00000034706 | -9,35E-01 | -2,600669529 | 7,65E-01  | 3,82E-01 | 6,83E-01 | Dnaic2        | 0,52 | No  |
| ENSMUSG00000034707 | 1,22E-01  | 8,923273622  | 4,57E+00  | 3,26E-02 | 2,11E-01 | Gns           | 1,09 | No  |
| ENSMUSG00000034708 | 1,87E-01  | 10,12884552  | 1,10E+01  | 9,08E-04 | 1,50E-02 | Grn           | 1,14 | Yes |
| ENSMUSG00000034709 | 1,37E-01  | 6,374669459  | 4,70E+00  | 3,01E-02 | 1,99E-01 | Ppp1r21       | 1,10 | No  |
| ENSMUSG00000034714 | -8,48E-02 | 5,111794129  | 1,37E+00  | 2,42E-01 | 5,50E-01 | Ttyh2         | 0,94 | No  |
| ENSMUSG00000034723 | 1,97E-01  | 5,053809965  | 7,11E+00  | 7,67E-03 | 7,66E-02 | Tmx4          | 1,15 | No  |
| ENSMUSG00000034724 | 1,79E-02  | 6,445837063  | 8,11E-02  | 7,76E-01 | 9,45E-01 | Cnot6l        | 1,01 | No  |
| ENSMUSG00000034729 | -9,94E-03 | 3,383759329  | 9,46E-03  | 9,23E-01 | 1,00E+00 | Mrps10        | 0,99 | No  |
| ENSMUSG00000034730 | 8,54E-01  | -2,311207953 | 1,12E+00  | 2,90E-01 | 5,86E-01 | Adgrb1        | 1,81 | No  |
| ENSMUSG00000034731 | 1,66E-01  | 2,462720943  | 1,64E+00  | 2,01E-01 | 5,50E-01 | Dgkh          | 1,12 | No  |
| ENSMUSG00000034738 | -1,59E-01 | 4,041451995  | 3,33E+00  | 6,81E-02 | 3,28E-01 | Nostrin       | 0,90 | No  |
| ENSMUSG00000034739 | -3,81E-01 | -2,811458701 | 8,98E-02  | 7,64E-01 | 9,39E-01 | Mfrp          | 0,77 | No  |
| ENSMUSG00000034744 | 7,46E-02  | 5,433688148  | 1,16E+00  | 2,82E-01 | 5,79E-01 | Nagk          | 1,05 | No  |
| ENSMUSG00000034748 | 5,09E-02  | 3,996269924  | 3,29E-01  | 5,66E-01 | 8,28E-01 | Sirt6         | 1,04 | No  |
| ENSMUSG00000034751 | 4,26E-01  | 4,282689003  | 2,54E+01  | 4,72E-07 | 2,26E-05 | Mast4         | 1,34 | Yes |
| ENSMUSG00000034757 | 1,13E-01  | 5,630600367  | 2,77E+00  | 9,61E-02 | 3,87E-01 | Tmub2         | 1,08 | No  |
| ENSMUSG00000034758 | -1,18E-01 | 2,650751186  | 9,02E-01  | 3,42E-01 | 6,43E-01 | Tle6          | 0,92 | No  |
| ENSMUSG00000034761 | -1,81E-01 | 3,621236595  | 3,52E+00  | 6,05E-02 | 3,05E-01 | Map4k5        | 0,88 | No  |
| ENSMUSG00000034762 | -7,54E-01 | -2,401420905 | 6,36E-01  | 4,25E-01 | 7,19E-01 | Glis1         | 0,59 | No  |
| ENSMUSG00000034764 | 1,96E-01  | -2,051774412 | 7,74E-02  | 7,81E-01 | 9,49E-01 | 1700006J14Rik | 1,15 | No  |

|                    |           |              |           |          |          |          |      |     |
|--------------------|-----------|--------------|-----------|----------|----------|----------|------|-----|
| ENSMUSG00000034765 | -5,98E-01 | 6,560350923  | 9,14E+01  | 1,15E-21 | 3,07E-19 | Dusp5    | 0,66 | Yes |
| ENSMUSG00000034768 | 9,09E-01  | 1,461023306  | 2,39E+01  | 1,04E-06 | 4,56E-05 | Asb16    | 1,88 | Yes |
| ENSMUSG00000034771 | -1,28E-01 | 3,771408352  | 1,93E+00  | 1,64E-01 | 5,16E-01 | Tle2     | 0,91 | No  |
| ENSMUSG00000034773 | 4,08E-01  | 4,057945575  | 2,18E+01  | 2,98E-06 | 1,15E-04 | BC030867 | 1,33 | Yes |
| ENSMUSG00000034777 | -3,83E-02 | -3,107651936 | -7,91E-11 | 1,00E+00 | 1,00E+00 | Vax2     | 0,97 | No  |
| ENSMUSG00000034780 | 1,79E+00  | -3,033666867 | 1,28E+00  | 2,58E-01 | 5,50E-01 | B3galt1  | 3,46 | No  |
| ENSMUSG00000034781 | -2,87E-02 | 4,289266023  | 1,17E-01  | 7,32E-01 | 9,22E-01 | Gna11    | 0,98 | No  |
| ENSMUSG00000034783 | 2,13E+00  | 1,751225054  | 1,20E+02  | 6,19E-28 | 2,94E-25 | Cd207    | 4,36 | Yes |
| ENSMUSG00000034785 | 1,13E+00  | -2,71172953  | 1,22E+00  | 2,69E-01 | 5,65E-01 | Dio1     | 2,20 | No  |
| ENSMUSG00000034786 | -9,70E-02 | 6,069315853  | 2,23E+00  | 1,35E-01 | 4,62E-01 | Gpsm3    | 0,93 | No  |
| ENSMUSG00000034789 | 1,62E-01  | 4,966161556  | 4,70E+00  | 3,02E-02 | 1,99E-01 | Rab24    | 1,12 | No  |
| ENSMUSG00000034792 | 1,63E-01  | 6,447336184  | 6,72E+00  | 9,53E-03 | 8,99E-02 | Gna15    | 1,12 | No  |
| ENSMUSG00000034793 | 6,34E-02  | 5,475865328  | 8,32E-01  | 3,62E-01 | 6,63E-01 | G6pc3    | 1,04 | No  |
| ENSMUSG00000034795 | -3,10E-01 | 3,09513719   | 8,10E+00  | 4,42E-03 | 5,09E-02 | Ccdc122  | 0,81 | No  |
| ENSMUSG00000034796 | -2,70E+00 | -3,033614577 | 2,89E+00  | 8,93E-02 | 3,79E-01 | Cpne7    | 0,15 | No  |
| ENSMUSG00000034799 | 9,73E-02  | 6,077071089  | 2,25E+00  | 1,33E-01 | 4,60E-01 | Unc13a   | 1,07 | No  |
| ENSMUSG00000034800 | 4,82E-01  | 1,309107657  | 6,91E+00  | 8,56E-03 | 8,33E-02 | Zfp661   | 1,40 | No  |
| ENSMUSG00000034801 | 3,63E-04  | 5,682860245  | 2,89E-05  | 9,96E-01 | 1,00E+00 | Sos2     | 1,00 | No  |
| ENSMUSG00000034807 | 1,04E-01  | 9,266870338  | 3,35E+00  | 6,70E-02 | 3,26E-01 | Colgalt1 | 1,07 | No  |
| ENSMUSG00000034813 | 2,26E-01  | -2,448635567 | 6,42E-02  | 8,00E-01 | 9,60E-01 | Grip1    | 1,17 | No  |
| ENSMUSG00000034818 | -9,53E-01 | 0,274138149  | 1,26E+01  | 3,76E-04 | 7,27E-03 | Celf5    | 0,52 | Yes |
| ENSMUSG00000034820 | -1,09E-01 | 6,627492908  | 3,06E+00  | 8,01E-02 | 3,62E-01 | Cpsf7    | 0,93 | No  |
| ENSMUSG00000034825 | 3,73E-01  | -1,832069154 | 3,36E-01  | 5,62E-01 | 8,25E-01 | Nrip3    | 1,30 | No  |
| ENSMUSG00000034826 | -9,83E-02 | 4,566927716  | 1,53E+00  | 2,16E-01 | 5,50E-01 | Nup54    | 0,93 | No  |
| ENSMUSG00000034829 | 1,14E-01  | -0,641425658 | 8,83E-02  | 7,66E-01 | 9,40E-01 | Nxn11    | 1,08 | No  |
| ENSMUSG00000034832 | 2,10E-01  | 7,229866442  | 1,22E+01  | 4,73E-04 | 8,76E-03 | Tet3     | 1,16 | Yes |
| ENSMUSG00000034833 | 6,02E-01  | 0,644112197  | 6,60E+00  | 1,02E-02 | 9,49E-02 | Tespa1   | 1,52 | No  |
| ENSMUSG00000034837 | -2,82E+00 | -2,49751131  | 7,68E+00  | 5,58E-03 | 6,06E-02 | Gnat1    | 0,14 | No  |
| ENSMUSG00000034839 | -4,36E-01 | -2,497590272 | 1,94E-01  | 6,59E-01 | 8,82E-01 | Larp6    | 0,74 | No  |
| ENSMUSG00000034842 | 1,36E+00  | -2,088743841 | 2,96E+00  | 8,51E-02 | 3,75E-01 | Art3     | 2,57 | No  |
| ENSMUSG00000034845 | 8,57E-02  | -2,107713066 | 1,44E-02  | 9,05E-01 | 1,00E+00 | Plvap    | 1,06 | No  |
| ENSMUSG00000034848 | 2,11E-01  | 4,370097503  | 6,39E+00  | 1,14E-02 | 1,03E-01 | Ttc21b   | 1,16 | No  |

|                    |           |              |          |          |          |         |      |     |
|--------------------|-----------|--------------|----------|----------|----------|---------|------|-----|
| ENSMUSG00000034850 | -1,06E-01 | 7,137850095  | 3,08E+00 | 7,92E-02 | 3,60E-01 | Tmem127 | 0,93 | No  |
| ENSMUSG00000034853 | 2,40E-01  | 4,85852958   | 1,02E+01 | 1,37E-03 | 2,08E-02 | Acot11  | 1,18 | Yes |
| ENSMUSG00000034854 | 2,94E-01  | 7,664656733  | 2,49E+01 | 5,97E-07 | 2,79E-05 | Mfsd12  | 1,23 | Yes |
| ENSMUSG00000034855 | -4,88E-01 | 1,041908354  | 5,73E+00 | 1,67E-02 | 1,35E-01 | Cxcl10  | 0,71 | No  |
| ENSMUSG00000034858 | 7,03E-03  | 4,540119123  | 7,89E-03 | 9,29E-01 | 1,00E+00 | Fam214a | 1,00 | No  |
| ENSMUSG00000034863 | 9,82E-02  | 4,715929312  | 1,63E+00 | 2,02E-01 | 5,50E-01 | Ano8    | 1,07 | No  |
| ENSMUSG00000034867 | -1,18E-01 | 5,099011208  | 2,62E+00 | 1,06E-01 | 3,98E-01 | Ankrd27 | 0,92 | No  |
| ENSMUSG00000034868 | -8,12E-02 | 7,758444789  | 1,92E+00 | 1,66E-01 | 5,19E-01 | Myl12b  | 0,95 | No  |
| ENSMUSG00000034871 | 3,77E-01  | 2,92013718   | 1,10E+01 | 8,90E-04 | 1,47E-02 | Fam151a | 1,30 | Yes |
| ENSMUSG00000034872 | 1,29E-01  | 1,083230103  | 4,24E-01 | 5,15E-01 | 7,96E-01 | Gipc3   | 1,09 | No  |
| ENSMUSG00000034875 | 1,23E-02  | 4,567005933  | 2,35E-02 | 8,78E-01 | 1,00E+00 | Nudt19  | 1,01 | No  |
| ENSMUSG00000034880 | 4,81E-02  | 4,43499707   | 3,51E-01 | 5,54E-01 | 8,19E-01 | Mrpl34  | 1,03 | No  |
| ENSMUSG00000034881 | 3,14E+00  | -2,711708169 | 4,03E+00 | 4,47E-02 | 2,52E-01 | Tbxa2r  | 8,83 | No  |
| ENSMUSG00000034883 | 3,89E-01  | 2,153043949  | 7,19E+00 | 7,33E-03 | 7,42E-02 | Lrr1    | 1,31 | No  |
| ENSMUSG00000034889 | 9,59E-02  | 5,71251401   | 2,01E+00 | 1,56E-01 | 5,00E-01 | Cactin  | 1,07 | No  |
| ENSMUSG00000034892 | -1,88E-01 | 1,248322681  | 1,00E+00 | 3,17E-01 | 6,18E-01 | Rps29   | 0,88 | No  |
| ENSMUSG00000034893 | -3,29E-02 | 5,415849183  | 2,24E-01 | 6,36E-01 | 8,67E-01 | Cog3    | 0,98 | No  |
| ENSMUSG00000034898 | -6,71E-01 | -0,413020262 | 3,60E+00 | 5,79E-02 | 2,97E-01 | Filip1  | 0,63 | No  |
| ENSMUSG00000034902 | -2,98E-03 | 8,539131743  | 2,69E-03 | 9,59E-01 | 1,00E+00 | Pip5k1c | 1,00 | No  |
| ENSMUSG00000034903 | 2,38E-01  | 1,502080713  | 1,68E+00 | 1,95E-01 | 5,50E-01 | Cobll1  | 1,18 | No  |
| ENSMUSG00000034906 | 1,58E-01  | 5,004219973  | 4,53E+00 | 3,32E-02 | 2,14E-01 | Ncaph   | 1,12 | No  |
| ENSMUSG00000034908 | 1,74E-01  | 8,48421148   | 9,19E+00 | 2,43E-03 | 3,26E-02 | Sidt2   | 1,13 | Yes |
| ENSMUSG00000034910 | -2,71E+00 | -2,963235336 | 2,92E+00 | 8,75E-02 | 3,78E-01 | Pygo1   | 0,15 | No  |
| ENSMUSG00000034911 | -5,74E-01 | -2,49760605  | 2,58E-01 | 6,11E-01 | 8,52E-01 | Ushbp1  | 0,67 | No  |
| ENSMUSG00000034917 | -1,83E-01 | 2,907427047  | 2,56E+00 | 1,09E-01 | 4,06E-01 | Tjp3    | 0,88 | No  |
| ENSMUSG00000034918 | 2,64E+00  | -2,963240788 | 2,69E+00 | 1,01E-01 | 3,92E-01 | Cdhr2   | 6,24 | No  |
| ENSMUSG00000034926 | 2,39E-01  | 7,732459206  | 1,65E+01 | 4,78E-05 | 1,31E-03 | Dhcr24  | 1,18 | Yes |
| ENSMUSG00000034928 | 1,18E-01  | 7,304171599  | 3,92E+00 | 4,78E-02 | 2,62E-01 | Rnf44   | 1,09 | No  |
| ENSMUSG00000034930 | 4,18E-01  | 1,665037977  | 6,28E+00 | 1,22E-02 | 1,08E-01 | Rtkn    | 1,34 | No  |
| ENSMUSG00000034931 | 1,02E-01  | 5,441740035  | 2,17E+00 | 1,41E-01 | 4,74E-01 | Dhx8    | 1,07 | No  |
| ENSMUSG00000034932 | 1,10E-01  | 4,573158031  | 1,94E+00 | 1,64E-01 | 5,15E-01 | Mrpl54  | 1,08 | No  |
| ENSMUSG00000034936 | -3,16E-02 | -0,436829952 | 7,09E-03 | 9,33E-01 | 1,00E+00 | Arl4d   | 0,98 | No  |



|                    |           |              |          |          |          |          |      |     |
|--------------------|-----------|--------------|----------|----------|----------|----------|------|-----|
| ENSMUSG00000034940 | 1,39E-01  | 6,32471567   | 4,76E+00 | 2,91E-02 | 1,94E-01 | Synrg    | 1,10 | No  |
| ENSMUSG00000034947 | 2,02E-02  | 6,465485666  | 1,04E-01 | 7,47E-01 | 9,30E-01 | Tmem106a | 1,01 | No  |
| ENSMUSG00000034949 | -1,01E+00 | 1,230187415  | 2,79E+01 | 1,28E-07 | 6,95E-06 | Zfr2     | 0,50 | Yes |
| ENSMUSG00000034951 | 8,67E-02  | 4,823812682  | 1,29E+00 | 2,56E-01 | 5,50E-01 | Cog7     | 1,06 | No  |
| ENSMUSG00000034957 | 2,55E-01  | 7,122784086  | 1,77E+01 | 2,52E-05 | 7,57E-04 | Cebpa    | 1,19 | Yes |
| ENSMUSG00000034958 | -8,49E-01 | -0,67592889  | 5,37E+00 | 2,04E-02 | 1,54E-01 | Atcay    | 0,56 | No  |
| ENSMUSG00000034959 | 1,80E-01  | 3,5789382    | 3,41E+00 | 6,49E-02 | 3,19E-01 | Rubcnl   | 1,13 | No  |
| ENSMUSG00000034968 | 1,08E-01  | -0,548167746 | 8,88E-02 | 7,66E-01 | 9,40E-01 | Lbx2     | 1,08 | No  |
| ENSMUSG00000034973 | 2,01E-04  | 6,11657814   | 9,73E-06 | 9,98E-01 | 1,00E+00 | Dopey1   | 1,00 | No  |
| ENSMUSG00000034974 | 4,88E-02  | 5,239924338  | 4,69E-01 | 4,93E-01 | 7,79E-01 | Dapk3    | 1,03 | No  |
| ENSMUSG00000034981 | -3,63E-01 | -0,946274268 | 8,83E-01 | 3,47E-01 | 6,48E-01 | Parm1    | 0,78 | No  |
| ENSMUSG00000034987 | 7,03E-02  | 1,922759408  | 2,18E-01 | 6,41E-01 | 8,70E-01 | Hrh2     | 1,05 | No  |
| ENSMUSG00000034990 | 2,45E-01  | -2,448630166 | 7,58E-02 | 7,83E-01 | 9,50E-01 | Otoa     | 1,19 | No  |
| ENSMUSG00000034993 | 1,75E-01  | 9,104683819  | 9,46E+00 | 2,10E-03 | 2,91E-02 | Vat1     | 1,13 | Yes |
| ENSMUSG00000034994 | -1,07E-01 | 10,90190522  | 3,67E+00 | 5,52E-02 | 2,88E-01 | Eef2     | 0,93 | No  |
| ENSMUSG00000034997 | -3,63E-02 | 1,809641811  | 4,73E-02 | 8,28E-01 | 9,76E-01 | Htr2a    | 0,98 | No  |
| ENSMUSG00000034998 | -4,41E-02 | 6,15819646   | 4,74E-01 | 4,91E-01 | 7,77E-01 | Foxn2    | 0,97 | No  |
| ENSMUSG00000035000 | -5,29E-01 | 5,576970089  | 6,03E+01 | 8,01E-15 | 1,20E-12 | Dpp4     | 0,69 | Yes |
| ENSMUSG00000035004 | 3,94E-02  | 6,174466439  | 3,76E-01 | 5,40E-01 | 8,10E-01 | Igsf6    | 1,03 | No  |
| ENSMUSG00000035007 | 1,90E-01  | 4,651895768  | 5,87E+00 | 1,54E-02 | 1,28E-01 | Rundc1   | 1,14 | No  |
| ENSMUSG00000035011 | 1,33E-01  | 6,858147962  | 4,73E+00 | 2,96E-02 | 1,97E-01 | Zbtb7a   | 1,10 | No  |
| ENSMUSG00000035020 | -5,88E-02 | -3,033652696 | 1,62E-03 | 9,68E-01 | 1,00E+00 | Epgn     | 0,96 | No  |
| ENSMUSG00000035021 | 1,12E-01  | 6,982026992  | 3,40E+00 | 6,52E-02 | 3,20E-01 | Baz1a    | 1,08 | No  |
| ENSMUSG00000035024 | 2,06E-01  | 5,3680417    | 8,54E+00 | 3,47E-03 | 4,27E-02 | Ncapd3   | 1,15 | Yes |
| ENSMUSG00000035027 | 2,68E-02  | 6,34312444   | 1,78E-01 | 6,73E-01 | 8,90E-01 | Map2k2   | 1,02 | No  |
| ENSMUSG00000035031 | 5,44E-01  | 0,070421226  | 3,37E+00 | 6,65E-02 | 3,24E-01 | C8a      | 1,46 | No  |
| ENSMUSG00000035032 | -3,70E-01 | -2,088761642 | 2,45E-01 | 6,20E-01 | 8,57E-01 | Nek11    | 0,77 | No  |
| ENSMUSG00000035033 | -2,02E+00 | -2,355535679 | 3,09E+00 | 7,88E-02 | 3,59E-01 | Tbr1     | 0,25 | No  |
| ENSMUSG00000035041 | 1,54E-01  | -1,088733677 | 1,08E-01 | 7,42E-01 | 9,27E-01 | Creb3l3  | 1,11 | No  |
| ENSMUSG00000035042 | -9,13E-01 | 7,39528083   | 2,32E+02 | 1,89E-52 | 5,67E-49 | Ccl5     | 0,53 | Yes |
| ENSMUSG00000035047 | 5,86E-02  | 4,775355975  | 5,88E-01 | 4,43E-01 | 7,35E-01 | Kri1     | 1,04 | No  |
| ENSMUSG00000035048 | -1,45E-01 | 3,632265202  | 2,24E+00 | 1,35E-01 | 4,62E-01 | Anapc13  | 0,90 | No  |

|                    |           |              |          |          |          |               |      |     |
|--------------------|-----------|--------------|----------|----------|----------|---------------|------|-----|
| ENSMUSG00000035049 | 1,31E-01  | 4,456473354  | 2,53E+00 | 1,12E-01 | 4,11E-01 | Rrp12         | 1,10 | No  |
| ENSMUSG00000035051 | -1,57E-01 | 4,844999104  | 4,35E+00 | 3,70E-02 | 2,29E-01 | Dhx57         | 0,90 | No  |
| ENSMUSG00000035064 | 1,06E-01  | 3,765605827  | 1,25E+00 | 2,64E-01 | 5,58E-01 | Eef2k         | 1,08 | No  |
| ENSMUSG00000035067 | -6,11E-02 | -1,929295672 | 7,81E-03 | 9,30E-01 | 1,00E+00 | Xkr6          | 0,96 | No  |
| ENSMUSG00000035069 | 1,64E-01  | 3,990912134  | 3,39E+00 | 6,57E-02 | 3,21E-01 | Oma1          | 1,12 | No  |
| ENSMUSG00000035078 | 5,18E-02  | 5,832049127  | 6,07E-01 | 4,36E-01 | 7,29E-01 | Mtmr9         | 1,04 | No  |
| ENSMUSG00000035085 | -1,88E-01 | -0,503683011 | 2,89E-01 | 5,91E-01 | 8,41E-01 | 1700020L24Rik | 0,88 | No  |
| ENSMUSG00000035086 | -1,01E-01 | 6,516130432  | 2,63E+00 | 1,05E-01 | 3,97E-01 | Becn1         | 0,93 | No  |
| ENSMUSG00000035093 | 1,32E-01  | 7,073086342  | 4,73E+00 | 2,96E-02 | 1,96E-01 | Secisbp2l     | 1,10 | No  |
| ENSMUSG00000035095 | -3,62E-01 | 0,809244452  | 2,74E+00 | 9,77E-02 | 3,90E-01 | Fam167a       | 0,78 | No  |
| ENSMUSG00000035104 | -8,26E-01 | -1,800802823 | 1,85E+00 | 1,74E-01 | 5,32E-01 | Eva1a         | 0,56 | No  |
| ENSMUSG00000035105 | 6,43E-01  | 4,130056542  | 5,28E+01 | 3,73E-13 | 4,77E-11 | Egln3         | 1,56 | Yes |
| ENSMUSG00000035107 | -1,55E-01 | 4,634219008  | 3,97E+00 | 4,62E-02 | 2,57E-01 | Dcbld2        | 0,90 | No  |
| ENSMUSG00000035109 | 4,99E-02  | 3,453580756  | 2,45E-01 | 6,21E-01 | 8,57E-01 | Shc4          | 1,04 | No  |
| ENSMUSG00000035112 | -9,59E-01 | -1,321998543 | 3,19E+00 | 7,43E-02 | 3,47E-01 | Wnk4          | 0,51 | No  |
| ENSMUSG00000035121 | -7,85E-03 | 1,661441149  | 2,12E-03 | 9,63E-01 | 1,00E+00 | Neil2         | 0,99 | No  |
| ENSMUSG00000035125 | 2,18E-01  | 3,314850619  | 4,40E+00 | 3,60E-02 | 2,25E-01 | Gcfc2         | 1,16 | No  |
| ENSMUSG00000035126 | 6,32E-01  | 0,865909025  | 8,35E+00 | 3,85E-03 | 4,60E-02 | Wdr78         | 1,55 | Yes |
| ENSMUSG00000035129 | 1,32E-01  | 4,154391298  | 2,38E+00 | 1,23E-01 | 4,38E-01 | Gm6781        | 1,10 | No  |
| ENSMUSG00000035133 | 1,02E-01  | 5,53883311   | 2,21E+00 | 1,37E-01 | 4,67E-01 | Arhgap5       | 1,07 | No  |
| ENSMUSG00000035139 | -7,60E-03 | 4,952345435  | 1,04E-02 | 9,19E-01 | 1,00E+00 | Secisbp2      | 0,99 | No  |
| ENSMUSG00000035142 | -4,37E-02 | 0,752920064  | 3,78E-02 | 8,46E-01 | 9,87E-01 | Nubpl         | 0,97 | No  |
| ENSMUSG00000035148 | -5,21E-01 | -0,997948305 | 1,26E+00 | 2,62E-01 | 5,56E-01 | Gpr33         | 0,70 | No  |
| ENSMUSG00000035151 | 1,05E-01  | 4,683727623  | 1,84E+00 | 1,75E-01 | 5,33E-01 | Elmod2        | 1,08 | No  |
| ENSMUSG00000035152 | -5,62E-03 | 7,94467833   | 9,30E-03 | 9,23E-01 | 1,00E+00 | Ap2b1         | 1,00 | No  |
| ENSMUSG00000035158 | 1,06E-01  | 6,391026083  | 2,81E+00 | 9,35E-02 | 3,83E-01 | Mitf          | 1,08 | No  |
| ENSMUSG00000035161 | 4,23E-02  | 5,582539208  | 3,84E-01 | 5,35E-01 | 8,08E-01 | Ints6         | 1,03 | No  |
| ENSMUSG00000035164 | -1,78E-01 | 6,884818336  | 8,42E+00 | 3,71E-03 | 4,47E-02 | Zc3h12c       | 0,88 | Yes |
| ENSMUSG00000035165 | 7,91E-01  | 2,180623471  | 2,86E+01 | 8,83E-08 | 5,01E-06 | Kcne3         | 1,73 | Yes |
| ENSMUSG00000035168 | -4,26E-02 | 4,71197395   | 3,02E-01 | 5,83E-01 | 8,38E-01 | Tanc1         | 0,97 | No  |
| ENSMUSG00000035171 | 3,53E-02  | 4,09689904   | 1,63E-01 | 6,86E-01 | 8,97E-01 | 1110059E24Rik | 1,02 | No  |
| ENSMUSG00000035172 | 3,10E-01  | 1,616972447  | 3,40E+00 | 6,54E-02 | 3,21E-01 | Plekhh3       | 1,24 | No  |

|                    |           |              |          |          |          |          |      |     |
|--------------------|-----------|--------------|----------|----------|----------|----------|------|-----|
| ENSMUSG00000035173 | 8,39E-02  | 5,465690776  | 1,46E+00 | 2,27E-01 | 5,50E-01 | Ccdc186  | 1,06 | No  |
| ENSMUSG00000035179 | 1,09E+00  | -0,831991161 | 4,86E+00 | 2,75E-02 | 1,87E-01 | Ppp1r32  | 2,13 | No  |
| ENSMUSG00000035181 | 1,77E-01  | 6,233045752  | 7,61E+00 | 5,79E-03 | 6,24E-02 | Heatr5a  | 1,13 | No  |
| ENSMUSG00000035183 | 6,38E-03  | 2,102548579  | 1,98E-03 | 9,65E-01 | 1,00E+00 | Slc24a5  | 1,00 | No  |
| ENSMUSG00000035184 | -1,45E-01 | 1,028244804  | 4,98E-01 | 4,80E-01 | 7,68E-01 | Fam124a  | 0,90 | No  |
| ENSMUSG00000035186 | -1,94E+00 | -3,107619243 | 1,50E+00 | 2,21E-01 | 5,50E-01 | Ubd      | 0,26 | No  |
| ENSMUSG00000035187 | 1,03E-01  | -1,963335706 | 2,09E-02 | 8,85E-01 | 1,00E+00 | Nkx6-1   | 1,07 | No  |
| ENSMUSG00000035191 | -4,13E-02 | -3,033659495 | 7,08E-04 | 9,79E-01 | 1,00E+00 | Rfpl4    | 0,97 | No  |
| ENSMUSG00000035198 | 1,71E-01  | 4,746715552  | 4,92E+00 | 2,66E-02 | 1,83E-01 | Tubg1    | 1,13 | No  |
| ENSMUSG00000035199 | 7,54E-03  | 7,515748926  | 1,62E-02 | 8,99E-01 | 1,00E+00 | Arl6ip5  | 1,01 | No  |
| ENSMUSG00000035200 | -7,14E-01 | -2,355547957 | 8,67E-01 | 3,52E-01 | 6,53E-01 | Chrn4    | 0,61 | No  |
| ENSMUSG00000035202 | -7,44E-01 | 9,008858113  | 1,66E+02 | 4,57E-38 | 4,72E-35 | Lars2    | 0,60 | Yes |
| ENSMUSG00000035203 | 1,03E-01  | 7,235560338  | 2,92E+00 | 8,76E-02 | 3,78E-01 | Epn1     | 1,07 | No  |
| ENSMUSG00000035206 | 9,06E-02  | 4,811444671  | 1,43E+00 | 2,32E-01 | 5,50E-01 | Sspl2b   | 1,06 | No  |
| ENSMUSG00000035208 | -9,15E-02 | 3,734734455  | 9,81E-01 | 3,22E-01 | 6,22E-01 | Sfn8     | 0,94 | No  |
| ENSMUSG00000035211 | 2,45E-01  | -0,748393973 | 3,99E-01 | 5,28E-01 | 8,04E-01 | Xrra1    | 1,19 | No  |
| ENSMUSG00000035212 | -1,28E-02 | 7,437046034  | 4,62E-02 | 8,30E-01 | 9,77E-01 | Leprot   | 0,99 | No  |
| ENSMUSG00000035215 | -6,79E-02 | 1,989041177  | 1,99E-01 | 6,55E-01 | 8,79E-01 | Lsm7     | 0,95 | No  |
| ENSMUSG00000035226 | -1,89E+00 | -3,1076441   | 1,42E+00 | 2,33E-01 | 5,50E-01 | Rims4    | 0,27 | No  |
| ENSMUSG00000035227 | 1,83E-01  | 6,550022689  | 8,54E+00 | 3,48E-03 | 4,27E-02 | Spcs2    | 1,14 | Yes |
| ENSMUSG00000035228 | -1,78E-01 | -0,992148381 | 1,77E-01 | 6,74E-01 | 8,90E-01 | Ccdc106  | 0,88 | No  |
| ENSMUSG00000035234 | 2,12E-01  | 2,751118929  | 3,15E+00 | 7,60E-02 | 3,52E-01 | Abraxas1 | 1,16 | No  |
| ENSMUSG00000035235 | -1,16E-01 | 3,033400094  | 1,08E+00 | 2,98E-01 | 5,94E-01 | Trim13   | 0,92 | No  |
| ENSMUSG00000035236 | -3,50E-01 | 4,593004345  | 1,98E+01 | 8,60E-06 | 2,94E-04 | Scai     | 0,78 | Yes |
| ENSMUSG00000035237 | -7,81E-01 | -0,289208086 | 5,24E+00 | 2,21E-02 | 1,61E-01 | Lcat     | 0,58 | No  |
| ENSMUSG00000035239 | -2,70E-01 | 1,192961098  | 2,12E+00 | 1,46E-01 | 4,83E-01 | Neu3     | 0,83 | No  |
| ENSMUSG00000035242 | -7,32E-02 | 6,753204131  | 1,41E+00 | 2,35E-01 | 5,50E-01 | Oaz1     | 0,95 | No  |
| ENSMUSG00000035245 | 3,30E-02  | 4,742771987  | 1,83E-01 | 6,69E-01 | 8,87E-01 | Eogt     | 1,02 | No  |
| ENSMUSG00000035247 | 3,06E-02  | 7,44816296   | 2,66E-01 | 6,06E-01 | 8,49E-01 | Hectd1   | 1,02 | No  |
| ENSMUSG00000035248 | -1,20E-02 | 6,996968095  | 3,92E-02 | 8,43E-01 | 9,85E-01 | Zcchc6   | 0,99 | No  |
| ENSMUSG00000035258 | -1,17E+00 | 1,244480749  | 4,13E+01 | 1,30E-10 | 1,21E-08 | Abi3bp   | 0,44 | Yes |
| ENSMUSG00000035262 | -2,44E-01 | -1,165783836 | 2,51E-01 | 6,16E-01 | 8,55E-01 | Amh      | 0,84 | No  |

|                    |           |              |          |          |          |               |      |     |
|--------------------|-----------|--------------|----------|----------|----------|---------------|------|-----|
| ENSMUSG00000035266 | 4,76E-02  | 3,008384797  | 1,76E-01 | 6,75E-01 | 8,91E-01 | Helq          | 1,03 | No  |
| ENSMUSG00000035268 | -2,93E-03 | 4,637099732  | 1,39E-03 | 9,70E-01 | 1,00E+00 | Pkig          | 1,00 | No  |
| ENSMUSG00000035270 | -7,40E-01 | -0,614106183 | 3,68E+00 | 5,51E-02 | 2,88E-01 | Impg2         | 0,60 | No  |
| ENSMUSG00000035273 | 1,78E-02  | 5,542881188  | 6,69E-02 | 7,96E-01 | 9,57E-01 | Hpse          | 1,01 | No  |
| ENSMUSG00000035274 | -4,88E-01 | 0,615886368  | 4,44E+00 | 3,51E-02 | 2,22E-01 | Tpbg          | 0,71 | No  |
| ENSMUSG00000035275 | -4,34E-01 | -0,770604666 | 1,15E+00 | 2,84E-01 | 5,81E-01 | Raver2        | 0,74 | No  |
| ENSMUSG00000035278 | -6,84E-02 | 4,905789959  | 8,33E-01 | 3,61E-01 | 6,63E-01 | Plekhj1       | 0,95 | No  |
| ENSMUSG00000035279 | 3,22E-01  | 0,087374177  | 1,41E+00 | 2,35E-01 | 5,50E-01 | Ssc5d         | 1,25 | No  |
| ENSMUSG00000035283 | -6,36E-04 | 0,477157277  | 6,17E-06 | 9,98E-01 | 1,00E+00 | Adrb1         | 1,00 | No  |
| ENSMUSG00000035284 | 2,42E-01  | 7,407092758  | 1,65E+01 | 4,92E-05 | 1,34E-03 | Vps13c        | 1,18 | Yes |
| ENSMUSG00000035285 | 2,44E-01  | -0,479034218 | 4,92E-01 | 4,83E-01 | 7,70E-01 | Nat14         | 1,18 | No  |
| ENSMUSG00000035293 | 2,17E-01  | 4,304521447  | 6,89E+00 | 8,67E-03 | 8,40E-02 | G2e3          | 1,16 | No  |
| ENSMUSG00000035295 | -1,14E-01 | 4,185024448  | 1,79E+00 | 1,81E-01 | 5,42E-01 | Wdr38         | 0,92 | No  |
| ENSMUSG00000035296 | -5,88E-02 | -3,033652696 | 1,62E-03 | 9,68E-01 | 1,00E+00 | Sgcg          | 0,96 | No  |
| ENSMUSG00000035297 | -1,49E-01 | 5,21095542   | 4,33E+00 | 3,74E-02 | 2,30E-01 | Cops4         | 0,90 | No  |
| ENSMUSG00000035298 | -9,37E-01 | -0,497467537 | 7,14E+00 | 7,53E-03 | 7,58E-02 | Klhl35        | 0,52 | No  |
| ENSMUSG00000035305 | -7,75E-02 | -2,600634094 | 5,47E-03 | 9,41E-01 | 1,00E+00 | Ror1          | 0,95 | No  |
| ENSMUSG00000035310 | 1,20E-01  | 5,093162233  | 2,71E+00 | 9,96E-02 | 3,92E-01 | Lin54         | 1,09 | No  |
| ENSMUSG00000035311 | 9,71E-02  | 6,238670402  | 2,29E+00 | 1,31E-01 | 4,54E-01 | Gnptab        | 1,07 | No  |
| ENSMUSG00000035314 | 2,63E-01  | 3,962435635  | 8,56E+00 | 3,44E-03 | 4,24E-02 | Gdpd5         | 1,20 | Yes |
| ENSMUSG00000035325 | 2,87E-02  | 7,021692514  | 2,23E-01 | 6,36E-01 | 8,67E-01 | Sec31a        | 1,02 | No  |
| ENSMUSG00000035329 | 1,13E-01  | 5,628401898  | 2,74E+00 | 9,81E-02 | 3,91E-01 | Fbxo33        | 1,08 | No  |
| ENSMUSG00000035337 | -1,49E-01 | 3,427995587  | 2,20E+00 | 1,38E-01 | 4,69E-01 | Uchl4         | 0,90 | No  |
| ENSMUSG00000035342 | 8,89E-02  | 3,630086337  | 8,57E-01 | 3,55E-01 | 6,56E-01 | Lzts2         | 1,06 | No  |
| ENSMUSG00000035351 | 2,22E-01  | 2,660331434  | 3,23E+00 | 7,21E-02 | 3,40E-01 | Nup37         | 1,17 | No  |
| ENSMUSG00000035352 | -3,24E-02 | 0,819577629  | 1,83E-02 | 8,92E-01 | 1,00E+00 | Ccl12         | 0,98 | No  |
| ENSMUSG00000035354 | -3,21E-01 | 6,730148677  | 2,71E+01 | 1,98E-07 | 1,04E-05 | Uvrag         | 0,80 | Yes |
| ENSMUSG00000035355 | -4,30E-01 | -0,96321321  | 1,03E+00 | 3,10E-01 | 6,09E-01 | Kcnh4         | 0,74 | No  |
| ENSMUSG00000035356 | -1,15E-02 | 4,559031938  | 2,16E-02 | 8,83E-01 | 1,00E+00 | Nfkbiz        | 0,99 | No  |
| ENSMUSG00000035357 | 7,58E-01  | -2,655092762 | 3,11E-01 | 5,77E-01 | 8,35E-01 | Pdzrn3        | 1,69 | No  |
| ENSMUSG00000035364 | 4,36E-01  | -0,419256453 | 1,73E+00 | 1,89E-01 | 5,50E-01 | 4930524J08Rik | 1,35 | No  |
| ENSMUSG00000035365 | 2,69E-01  | 3,580627168  | 7,74E+00 | 5,39E-03 | 5,91E-02 | Parpbp        | 1,21 | No  |

|                    |           |              |           |          |          |               |      |     |
|--------------------|-----------|--------------|-----------|----------|----------|---------------|------|-----|
| ENSMUSG00000035367 | 1,73E-01  | 4,349423255  | 4,40E+00  | 3,59E-02 | 2,25E-01 | Rmi1          | 1,13 | No  |
| ENSMUSG00000035370 | 1,20E-01  | 4,65827064   | 2,35E+00  | 1,25E-01 | 4,43E-01 | Adat3         | 1,09 | No  |
| ENSMUSG00000035372 | 7,54E-02  | 3,576666821  | 5,78E-01  | 4,47E-01 | 7,38E-01 | 1810055G02Rik | 1,05 | No  |
| ENSMUSG00000035373 | 1,17E-01  | 4,516025572  | 1,97E+00  | 1,60E-01 | 5,09E-01 | Ccl7          | 1,08 | No  |
| ENSMUSG00000035376 | -1,59E-02 | 3,29387209   | 2,33E-02  | 8,79E-01 | 1,00E+00 | Hacd2         | 0,99 | No  |
| ENSMUSG00000035378 | 2,04E-01  | 2,861063014  | 2,93E+00  | 8,68E-02 | 3,78E-01 | Shq1          | 1,15 | No  |
| ENSMUSG00000035382 | 8,02E-02  | 5,772850864  | 1,43E+00  | 2,32E-01 | 5,50E-01 | Pcsk7         | 1,06 | No  |
| ENSMUSG00000035383 | 1,66E-02  | 0,369019486  | 4,31E-03  | 9,48E-01 | 1,00E+00 | Pmch          | 1,01 | No  |
| ENSMUSG00000035385 | -1,37E-02 | 7,181353383  | 5,03E-02  | 8,23E-01 | 9,73E-01 | Ccl2          | 0,99 | No  |
| ENSMUSG00000035390 | 7,72E-01  | 0,330517331  | 8,45E+00  | 3,66E-03 | 4,43E-02 | Brsk1         | 1,71 | Yes |
| ENSMUSG00000035392 | 2,00E-01  | 5,4423679    | 8,05E+00  | 4,54E-03 | 5,19E-02 | Dennd1a       | 1,15 | No  |
| ENSMUSG00000035394 | -7,05E-01 | -1,146036109 | 1,88E+00  | 1,71E-01 | 5,27E-01 | Cfap53        | 0,61 | No  |
| ENSMUSG00000035397 | -1,07E-01 | 4,633694164  | 1,90E+00  | 1,68E-01 | 5,23E-01 | Klf16         | 0,93 | No  |
| ENSMUSG00000035399 | 1,82E-01  | 4,723622877  | 5,53E+00  | 1,87E-02 | 1,45E-01 | Oser1         | 1,13 | No  |
| ENSMUSG00000035401 | -3,20E-02 | 5,550709015  | 2,20E-01  | 6,39E-01 | 8,69E-01 | Emsy          | 0,98 | No  |
| ENSMUSG00000035403 | -6,63E-02 | -1,522642035 | 1,39E-02  | 9,06E-01 | 1,00E+00 | Crb2          | 0,96 | No  |
| ENSMUSG00000035413 | 8,66E-01  | -1,165762641 | 3,33E+00  | 6,80E-02 | 3,28E-01 | Tmem98        | 1,82 | No  |
| ENSMUSG00000035429 | -8,69E-01 | -0,627509097 | 5,77E+00  | 1,63E-02 | 1,33E-01 | Ptprh         | 0,55 | No  |
| ENSMUSG00000035435 | 3,40E-01  | 0,514655295  | 2,04E+00  | 1,53E-01 | 4,96E-01 | Abca17        | 1,27 | No  |
| ENSMUSG00000035437 | 1,90E-02  | 5,482457648  | 7,53E-02  | 7,84E-01 | 9,51E-01 | Rabgap1       | 1,01 | No  |
| ENSMUSG00000035439 | -9,20E-02 | 6,648923482  | 2,21E+00  | 1,37E-01 | 4,67E-01 | Haus8         | 0,94 | No  |
| ENSMUSG00000035441 | 2,46E-01  | 2,916628064  | 4,35E+00  | 3,69E-02 | 2,28E-01 | Myo1d         | 1,19 | No  |
| ENSMUSG00000035443 | 4,63E-02  | 4,470843326  | 3,29E-01  | 5,66E-01 | 8,29E-01 | Thyn1         | 1,03 | No  |
| ENSMUSG00000035448 | -2,71E-01 | -2,226308329 | 1,27E-01  | 7,22E-01 | 9,16E-01 | Ccr3          | 0,83 | No  |
| ENSMUSG00000035451 | 1,87E+00  | -3,107639691 | 1,38E+00  | 2,40E-01 | 5,50E-01 | Foxa1         | 3,67 | No  |
| ENSMUSG00000035455 | 3,76E-01  | 4,446741243  | 2,15E+01  | 3,56E-06 | 1,36E-04 | Figl1         | 1,30 | Yes |
| ENSMUSG00000035456 | -9,84E-01 | 0,08358014   | 1,18E+01  | 6,07E-04 | 1,08E-02 | Prdm8         | 0,51 | Yes |
| ENSMUSG00000035458 | -4,52E-01 | 3,120880419  | 1,80E+01  | 2,21E-05 | 6,81E-04 | Tnni3         | 0,73 | Yes |
| ENSMUSG00000035459 | -1,16E-01 | -0,946280318 | 7,86E-02  | 7,79E-01 | 9,48E-01 | Stab2         | 0,92 | No  |
| ENSMUSG00000035469 | 7,95E-02  | 5,171684804  | 1,21E+00  | 2,71E-01 | 5,67E-01 | Rcbtb1        | 1,06 | No  |
| ENSMUSG00000035472 | 3,14E-02  | -3,107617333 | -7,69E-10 | 1,00E+00 | 1,00E+00 | Slc25a21      | 1,02 | No  |
| ENSMUSG00000035473 | -2,23E-01 | 5,829774698  | 1,14E+01  | 7,46E-04 | 1,27E-02 | Galm          | 0,86 | Yes |

|                    |           |              |          |          |          |               |      |     |
|--------------------|-----------|--------------|----------|----------|----------|---------------|------|-----|
| ENSMUSG00000035478 | 7,71E-02  | 5,950013753  | 1,37E+00 | 2,41E-01 | 5,50E-01 | Mbd3          | 1,05 | No  |
| ENSMUSG00000035486 | -1,88E+00 | -2,896101069 | 1,42E+00 | 2,33E-01 | 5,50E-01 | Plk5          | 0,27 | No  |
| ENSMUSG00000035493 | 1,83E-01  | 9,284523051  | 1,04E+01 | 1,23E-03 | 1,91E-02 | Tgfb1         | 1,14 | Yes |
| ENSMUSG00000035495 | 3,65E-02  | 5,020806806  | 2,48E-01 | 6,18E-01 | 8,56E-01 | Tstd2         | 1,03 | No  |
| ENSMUSG00000035498 | -1,51E+00 | 1,13889621   | 5,79E+01 | 2,71E-14 | 3,88E-12 | Cdcp1         | 0,35 | Yes |
| ENSMUSG00000035504 | 1,89E-01  | -0,614078655 | 2,37E-01 | 6,26E-01 | 8,60E-01 | Reep6         | 1,14 | No  |
| ENSMUSG00000035505 | 6,69E-02  | 3,110832381  | 3,70E-01 | 5,43E-01 | 8,12E-01 | Cox18         | 1,05 | No  |
| ENSMUSG00000035506 | -2,00E-02 | -2,89610696  | 2,29E-04 | 9,88E-01 | 1,00E+00 | Slc12a8       | 0,99 | No  |
| ENSMUSG00000035509 | 6,25E-01  | -1,311324772 | 1,73E+00 | 1,88E-01 | 5,50E-01 | Fbxl21        | 1,54 | No  |
| ENSMUSG00000035513 | -3,53E-01 | 4,96234191   | 2,29E+01 | 1,73E-06 | 7,17E-05 | Ntng2         | 0,78 | Yes |
| ENSMUSG00000035517 | -3,77E-02 | 5,545010587  | 3,00E-01 | 5,84E-01 | 8,38E-01 | Tdrd7         | 0,97 | No  |
| ENSMUSG00000035521 | -8,68E-02 | 3,201303572  | 6,59E-01 | 4,17E-01 | 7,12E-01 | Gnptg         | 0,94 | No  |
| ENSMUSG00000035529 | 1,11E-01  | 5,351488471  | 2,46E+00 | 1,17E-01 | 4,23E-01 | Prdm4         | 1,08 | No  |
| ENSMUSG00000035530 | -1,76E-01 | 7,3831122    | 8,71E+00 | 3,16E-03 | 3,98E-02 | Eif1          | 0,89 | Yes |
| ENSMUSG00000035539 | -4,74E-01 | 0,302698133  | 2,96E+00 | 8,53E-02 | 3,75E-01 | Ccdc180       | 0,72 | No  |
| ENSMUSG00000035545 | -6,26E-02 | 7,590049027  | 1,13E+00 | 2,89E-01 | 5,84E-01 | Leng8         | 0,96 | No  |
| ENSMUSG00000035547 | 1,05E-01  | 3,516915687  | 1,09E+00 | 2,95E-01 | 5,91E-01 | Capn5         | 1,08 | No  |
| ENSMUSG00000035551 | 1,21E-02  | -3,033650469 | 7,34E-11 | 1,00E+00 | 1,00E+00 | Igfbpl1       | 1,01 | No  |
| ENSMUSG00000035557 | -1,89E+00 | -3,1076441   | 1,42E+00 | 2,33E-01 | 5,50E-01 | Krt17         | 0,27 | No  |
| ENSMUSG00000035559 | -2,29E-02 | 4,710412524  | 8,65E-02 | 7,69E-01 | 9,41E-01 | Mpv17l2       | 0,98 | No  |
| ENSMUSG00000035560 | -5,50E-01 | -1,226139804 | 1,21E+00 | 2,72E-01 | 5,69E-01 | Wdr20rt       | 0,68 | No  |
| ENSMUSG00000035561 | 1,41E-01  | 5,484903476  | 4,14E+00 | 4,19E-02 | 2,43E-01 | Aldh1b1       | 1,10 | No  |
| ENSMUSG00000035566 | 4,72E-01  | -2,770639385 | 1,75E-01 | 6,76E-01 | 8,91E-01 | Pcdh17        | 1,39 | No  |
| ENSMUSG00000035569 | -2,67E-03 | 7,984621793  | 2,10E-03 | 9,63E-01 | 1,00E+00 | Ankrd11       | 1,00 | No  |
| ENSMUSG00000035572 | -4,32E-03 | 5,28282949   | 3,71E-03 | 9,51E-01 | 1,00E+00 | Dcaf10        | 1,00 | No  |
| ENSMUSG00000035575 | 6,60E-02  | 5,329396665  | 8,78E-01 | 3,49E-01 | 6,50E-01 | Utp6          | 1,05 | No  |
| ENSMUSG00000035576 | -2,27E+00 | -2,448622978 | 4,20E+00 | 4,05E-02 | 2,38E-01 | L3mbtl1       | 0,21 | No  |
| ENSMUSG00000035578 | 1,72E-01  | 0,288450156  | 4,25E-01 | 5,15E-01 | 7,96E-01 | Iqcg          | 1,13 | No  |
| ENSMUSG00000035585 | 1,11E-02  | 4,71592884   | 2,08E-02 | 8,85E-01 | 1,00E+00 | Tsen34        | 1,01 | No  |
| ENSMUSG00000035594 | -1,24E+00 | -2,548191728 | 1,47E+00 | 2,26E-01 | 5,50E-01 | Chrna5        | 0,42 | No  |
| ENSMUSG00000035595 | -3,33E-03 | 2,619477163  | 7,11E-04 | 9,79E-01 | 1,00E+00 | 1600002K03Rik | 1,00 | No  |
| ENSMUSG00000035596 | -2,53E-02 | 6,039531273  | 1,51E-01 | 6,98E-01 | 9,04E-01 | Mboat7        | 0,98 | No  |

|                    |           |              |          |          |          |          |      |     |
|--------------------|-----------|--------------|----------|----------|----------|----------|------|-----|
| ENSMUSG00000035597 | -3,48E-02 | 6,28626817   | 2,96E-01 | 5,86E-01 | 8,39E-01 | Prpf39   | 0,98 | No  |
| ENSMUSG00000035601 | 1,84E-01  | 2,326267155  | 1,79E+00 | 1,81E-01 | 5,42E-01 | Trmt10b  | 1,14 | No  |
| ENSMUSG00000035606 | -3,19E-01 | 0,569445423  | 1,90E+00 | 1,68E-01 | 5,23E-01 | Ky       | 0,80 | No  |
| ENSMUSG00000035614 | -9,48E-02 | 5,357659967  | 1,84E+00 | 1,75E-01 | 5,33E-01 | Togaram1 | 0,94 | No  |
| ENSMUSG00000035615 | -4,43E-01 | -2,548168849 | 2,01E-01 | 6,54E-01 | 8,79E-01 | Frmpd1   | 0,74 | No  |
| ENSMUSG00000035620 | 7,85E-02  | 4,11009766   | 8,21E-01 | 3,65E-01 | 6,66E-01 | Ric8b    | 1,06 | No  |
| ENSMUSG00000035621 | 8,56E-02  | 5,971206316  | 1,72E+00 | 1,89E-01 | 5,50E-01 | Midn     | 1,06 | No  |
| ENSMUSG00000035623 | 7,06E-03  | 5,438696857  | 1,04E-02 | 9,19E-01 | 1,00E+00 | Rsf1     | 1,00 | No  |
| ENSMUSG00000035629 | -7,29E-02 | 5,688641158  | 1,18E+00 | 2,77E-01 | 5,73E-01 | Rubcn    | 0,95 | No  |
| ENSMUSG00000035632 | 3,02E-02  | 5,060351878  | 1,71E-01 | 6,79E-01 | 8,93E-01 | Cnot3    | 1,02 | No  |
| ENSMUSG00000035637 | 4,01E-01  | 3,066795772  | 1,26E+01 | 3,96E-04 | 7,57E-03 | Grhpr    | 1,32 | Yes |
| ENSMUSG00000035640 | -2,69E-01 | 3,196694941  | 6,47E+00 | 1,10E-02 | 9,98E-02 | Cbarp    | 0,83 | No  |
| ENSMUSG00000035642 | -1,54E-01 | 2,089838864  | 1,06E+00 | 3,03E-01 | 6,00E-01 | Aamdc    | 0,90 | No  |
| ENSMUSG00000035649 | -3,09E-02 | 5,174260813  | 1,85E-01 | 6,68E-01 | 8,86E-01 | Zcchc7   | 0,98 | No  |
| ENSMUSG00000035666 | 2,24E-01  | 5,338580533  | 1,02E+01 | 1,41E-03 | 2,13E-02 | Gtf3c4   | 1,17 | Yes |
| ENSMUSG00000035671 | -1,94E-01 | 5,844691726  | 8,42E+00 | 3,71E-03 | 4,48E-02 | Zswim4   | 0,87 | Yes |
| ENSMUSG00000035673 | -4,05E-02 | 7,283827206  | 4,60E-01 | 4,97E-01 | 7,83E-01 | Sbno2    | 0,97 | No  |
| ENSMUSG00000035674 | -1,36E-01 | 4,293792511  | 2,68E+00 | 1,02E-01 | 3,94E-01 | Ndufa3   | 0,91 | No  |
| ENSMUSG00000035678 | 1,95E-01  | 2,439712445  | 2,27E+00 | 1,32E-01 | 4,56E-01 | Tnfsf9   | 1,14 | No  |
| ENSMUSG00000035683 | 4,48E-02  | 4,541463744  | 3,18E-01 | 5,73E-01 | 8,32E-01 | Melk     | 1,03 | No  |
| ENSMUSG00000035686 | 1,82E+00  | -3,033661385 | 1,31E+00 | 2,52E-01 | 5,50E-01 | Thrsp    | 3,54 | No  |
| ENSMUSG00000035692 | -2,50E-01 | 2,697680647  | 4,36E+00 | 3,69E-02 | 2,28E-01 | Isg15    | 0,84 | No  |
| ENSMUSG00000035696 | 5,47E-02  | 6,567806344  | 7,72E-01 | 3,80E-01 | 6,81E-01 | Rnf38    | 1,04 | No  |
| ENSMUSG00000035697 | -6,52E-02 | 8,570022773  | 1,30E+00 | 2,55E-01 | 5,50E-01 | Arhgap45 | 0,96 | No  |
| ENSMUSG00000035699 | 1,34E-01  | -2,185622287 | 3,11E-02 | 8,60E-01 | 9,95E-01 | Slc51a   | 1,10 | No  |
| ENSMUSG00000035704 | 2,29E-01  | 4,208427867  | 7,35E+00 | 6,71E-03 | 6,97E-02 | Alg8     | 1,17 | No  |
| ENSMUSG00000035711 | -2,92E-02 | 6,279012395  | 2,08E-01 | 6,48E-01 | 8,75E-01 | Dok3     | 0,98 | No  |
| ENSMUSG00000035713 | -3,93E-01 | 4,081368201  | 2,10E+01 | 4,63E-06 | 1,69E-04 | Usp35    | 0,76 | Yes |
| ENSMUSG00000035722 | -1,07E-01 | 7,391885472  | 3,24E+00 | 7,17E-02 | 3,40E-01 | Abca7    | 0,93 | No  |
| ENSMUSG00000035726 | 3,53E-04  | 6,426083549  | 3,13E-05 | 9,96E-01 | 1,00E+00 | Supt16   | 1,00 | No  |
| ENSMUSG00000035735 | 3,42E-01  | 3,502445174  | 1,17E+01 | 6,26E-04 | 1,11E-02 | Dagla    | 1,27 | Yes |
| ENSMUSG00000035745 | -8,01E-02 | 1,189610133  | 1,71E-01 | 6,79E-01 | 8,93E-01 | Grin3b   | 0,95 | No  |

|                    |           |              |           |          |          |          |      |     |
|--------------------|-----------|--------------|-----------|----------|----------|----------|------|-----|
| ENSMUSG00000035754 | 2,16E-01  | 5,185736451  | 8,90E+00  | 2,85E-03 | 3,68E-02 | Wdr18    | 1,16 | Yes |
| ENSMUSG00000035757 | -1,18E-02 | 4,981679364  | 2,55E-02  | 8,73E-01 | 1,00E+00 | Selenoo  | 0,99 | No  |
| ENSMUSG00000035759 | -4,48E-02 | 2,18897343   | 1,01E-01  | 7,50E-01 | 9,31E-01 | Bbs10    | 0,97 | No  |
| ENSMUSG00000035762 | 6,30E-02  | 4,428986478  | 5,88E-01  | 4,43E-01 | 7,35E-01 | Tmem161b | 1,04 | No  |
| ENSMUSG00000035764 | 5,81E-02  | 5,176103752  | 6,49E-01  | 4,20E-01 | 7,16E-01 | Fbxo45   | 1,04 | No  |
| ENSMUSG00000035765 | 8,22E-02  | 5,038238345  | 1,24E+00  | 2,65E-01 | 5,60E-01 | Dym      | 1,06 | No  |
| ENSMUSG00000035769 | 4,35E-01  | 2,905862404  | 1,38E+01  | 1,99E-04 | 4,33E-03 | Xylb     | 1,35 | Yes |
| ENSMUSG00000035770 | 2,41E-01  | 6,145419688  | 1,40E+01  | 1,86E-04 | 4,09E-03 | Dync1li2 | 1,18 | Yes |
| ENSMUSG00000035772 | 8,83E-02  | 5,226526821  | 1,50E+00  | 2,21E-01 | 5,50E-01 | Mrps2    | 1,06 | No  |
| ENSMUSG00000035773 | -1,51E-01 | -0,50377926  | 1,99E-01  | 6,56E-01 | 8,80E-01 | Kiss1r   | 0,90 | No  |
| ENSMUSG00000035778 | -3,54E-01 | 7,184400228  | 3,48E+01  | 3,57E-09 | 2,68E-07 | Ggta1    | 0,78 | Yes |
| ENSMUSG00000035781 | -1,08E-01 | 5,84893528   | 2,65E+00  | 1,03E-01 | 3,95E-01 | R3hdm4   | 0,93 | No  |
| ENSMUSG00000035783 | 3,70E-01  | 1,870529418  | 5,51E+00  | 1,89E-02 | 1,46E-01 | Acta2    | 1,29 | No  |
| ENSMUSG00000035785 | -8,45E-01 | -2,963229433 | 3,92E-01  | 5,31E-01 | 8,05E-01 | Cmtm2b   | 0,56 | No  |
| ENSMUSG00000035790 | 1,66E-01  | 3,892831836  | 3,32E+00  | 6,85E-02 | 3,29E-01 | Cep19    | 1,12 | No  |
| ENSMUSG00000035798 | 8,10E-02  | 4,548798933  | 1,03E+00  | 3,10E-01 | 6,09E-01 | Zdhhc17  | 1,06 | No  |
| ENSMUSG00000035799 | -1,33E+00 | -2,8320094   | 1,11E+00  | 2,92E-01 | 5,87E-01 | Twist1   | 0,40 | No  |
| ENSMUSG00000035804 | 9,01E-03  | -3,107646452 | -5,16E-10 | 1,00E+00 | 1,00E+00 | Ins1     | 1,01 | No  |
| ENSMUSG00000035818 | -6,83E-01 | 0,586911759  | 8,74E+00  | 3,11E-03 | 3,94E-02 | Plekhs1  | 0,62 | Yes |
| ENSMUSG00000035824 | -1,46E-02 | 4,554713824  | 3,40E-02  | 8,54E-01 | 9,92E-01 | Tk2      | 0,99 | No  |
| ENSMUSG00000035828 | -4,12E-01 | 5,06667014   | 3,13E+01  | 2,19E-08 | 1,41E-06 | Pim3     | 0,75 | Yes |
| ENSMUSG00000035829 | 4,72E-01  | 0,952299909  | 5,18E+00  | 2,28E-02 | 1,64E-01 | Ppp1r26  | 1,39 | No  |
| ENSMUSG00000035834 | 1,53E-01  | 3,282180622  | 2,09E+00  | 1,48E-01 | 4,87E-01 | Polr3g   | 1,11 | No  |
| ENSMUSG00000035835 | 4,66E-02  | 3,774551595  | 2,49E-01  | 6,17E-01 | 8,55E-01 | Plppr3   | 1,03 | No  |
| ENSMUSG00000035840 | 1,39E-01  | 3,152783247  | 1,65E+00  | 1,99E-01 | 5,50E-01 | Lysmd3   | 1,10 | No  |
| ENSMUSG00000035842 | 1,90E-01  | 3,712045471  | 4,09E+00  | 4,31E-02 | 2,47E-01 | Ddx11    | 1,14 | No  |
| ENSMUSG00000035845 | 1,74E-01  | 3,746188542  | 3,49E+00  | 6,17E-02 | 3,09E-01 | Alg12    | 1,13 | No  |
| ENSMUSG00000035849 | -1,15E+00 | -0,980534408 | 7,05E+00  | 7,91E-03 | 7,83E-02 | Krt222   | 0,45 | No  |
| ENSMUSG00000035851 | -7,90E-02 | 6,226784996  | 1,51E+00  | 2,18E-01 | 5,50E-01 | Ythdc1   | 0,95 | No  |
| ENSMUSG00000035852 | 6,31E-02  | -1,896283452 | 9,72E-03  | 9,21E-01 | 1,00E+00 | Misp     | 1,04 | No  |
| ENSMUSG00000035860 | -1,11E+00 | 0,672787201  | 2,52E+01  | 5,05E-07 | 2,40E-05 | Cdhr3    | 0,46 | Yes |
| ENSMUSG00000035863 | -2,14E-01 | 4,209095302  | 6,29E+00  | 1,22E-02 | 1,08E-01 | Palm     | 0,86 | No  |



|                    |           |              |           |          |          |          |      |     |
|--------------------|-----------|--------------|-----------|----------|----------|----------|------|-----|
| ENSMUSG00000035864 | -9,36E-01 | -1,896163663 | 2,45E+00  | 1,18E-01 | 4,26E-01 | Syt1     | 0,52 | No  |
| ENSMUSG00000035868 | -1,25E-01 | 2,534361026  | 1,00E+00  | 3,16E-01 | 6,17E-01 | Zfp983   | 0,92 | No  |
| ENSMUSG00000035873 | 2,90E-01  | -2,448692547 | 8,55E-02  | 7,70E-01 | 9,42E-01 | Pawr     | 1,22 | No  |
| ENSMUSG00000035875 | -8,03E-02 | -0,816516185 | 4,21E-02  | 8,37E-01 | 9,82E-01 | Al182371 | 0,95 | No  |
| ENSMUSG00000035877 | 1,90E-01  | 3,719475297  | 4,10E+00  | 4,30E-02 | 2,47E-01 | Zhx3     | 1,14 | No  |
| ENSMUSG00000035878 | 2,34E-01  | -2,355630815 | 6,87E-02  | 7,93E-01 | 9,56E-01 | Hykk     | 1,18 | No  |
| ENSMUSG00000035885 | -6,50E-02 | 7,490948946  | 1,20E+00  | 2,73E-01 | 5,69E-01 | Cox8a    | 0,96 | No  |
| ENSMUSG00000035890 | 1,28E-01  | 5,036133805  | 3,01E+00  | 8,29E-02 | 3,70E-01 | Rnf126   | 1,09 | No  |
| ENSMUSG00000035891 | 1,66E-01  | 7,487893995  | 7,85E+00  | 5,08E-03 | 5,65E-02 | Cerk     | 1,12 | No  |
| ENSMUSG00000035896 | -3,18E+00 | -2,963258684 | 4,26E+00  | 3,90E-02 | 2,34E-01 | Rnase1   | 0,11 | No  |
| ENSMUSG00000035898 | 5,08E-02  | 4,716872714  | 4,33E-01  | 5,10E-01 | 7,94E-01 | Uba6     | 1,04 | No  |
| ENSMUSG00000035900 | 5,22E-03  | 6,627749184  | 7,11E-03  | 9,33E-01 | 1,00E+00 | Gramd4   | 1,00 | No  |
| ENSMUSG00000035901 | -2,38E-01 | 7,654426019  | 1,63E+01  | 5,33E-05 | 1,43E-03 | Dennd5a  | 0,85 | Yes |
| ENSMUSG00000035914 | 2,57E-01  | 2,833241544  | 4,62E+00  | 3,16E-02 | 2,06E-01 | Cd276    | 1,20 | No  |
| ENSMUSG00000035919 | -9,19E-04 | 4,074161009  | 1,11E-04  | 9,92E-01 | 1,00E+00 | Bbs9     | 1,00 | No  |
| ENSMUSG00000035929 | -3,59E-01 | 6,444079503  | 3,26E+01  | 1,11E-08 | 7,67E-07 | H2-Q4    | 0,78 | Yes |
| ENSMUSG00000035932 | -2,63E-02 | -3,033653157 | 2,33E-04  | 9,88E-01 | 1,00E+00 | Olf750   | 0,98 | No  |
| ENSMUSG00000035933 | 1,18E-02  | 5,768611638  | 3,10E-02  | 8,60E-01 | 9,95E-01 | Cog5     | 1,01 | No  |
| ENSMUSG00000035934 | 4,82E-01  | 1,866822596  | 8,67E+00  | 3,23E-03 | 4,05E-02 | Pknox2   | 1,40 | Yes |
| ENSMUSG00000035936 | -1,66E-01 | -0,690143155 | 1,94E-01  | 6,60E-01 | 8,82E-01 | Aldh5a1  | 0,89 | No  |
| ENSMUSG00000035941 | 1,60E-01  | 6,139696294  | 6,11E+00  | 1,34E-02 | 1,16E-01 | Ibtk     | 1,12 | No  |
| ENSMUSG00000035944 | -4,94E-02 | 3,890161448  | 2,95E-01  | 5,87E-01 | 8,40E-01 | Ttc38    | 0,97 | No  |
| ENSMUSG00000035946 | -1,89E+00 | -3,1076441   | 1,42E+00  | 2,33E-01 | 5,50E-01 | Gsx2     | 0,27 | No  |
| ENSMUSG00000035948 | 3,14E-02  | -3,107617333 | -7,69E-10 | 1,00E+00 | 1,00E+00 | Acsc3    | 1,02 | No  |
| ENSMUSG00000035949 | -1,51E-01 | 6,130910425  | 5,41E+00  | 2,00E-02 | 1,51E-01 | Fbxw2    | 0,90 | No  |
| ENSMUSG00000035951 | 1,91E+00  | -2,655148386 | 2,72E+00  | 9,92E-02 | 3,92E-01 | Ascl3    | 3,76 | No  |
| ENSMUSG00000035953 | 5,64E-02  | 6,685724855  | 8,32E-01  | 3,62E-01 | 6,63E-01 | Tmem55b  | 1,04 | No  |
| ENSMUSG00000035954 | 2,78E-01  | 5,071197337  | 1,42E+01  | 1,65E-04 | 3,68E-03 | Dock4    | 1,21 | Yes |
| ENSMUSG00000035958 | 5,56E-02  | 4,457490563  | 4,64E-01  | 4,96E-01 | 7,81E-01 | Tdp2     | 1,04 | No  |
| ENSMUSG00000035960 | 4,00E-02  | 5,117372683  | 3,01E-01  | 5,83E-01 | 8,38E-01 | Apex1    | 1,03 | No  |
| ENSMUSG00000035969 | 2,44E-01  | 6,033400708  | 1,38E+01  | 2,00E-04 | 4,34E-03 | Rusc2    | 1,18 | Yes |
| ENSMUSG00000035983 | -6,20E-02 | 3,07971513   | 3,21E-01  | 5,71E-01 | 8,31E-01 | Gm7008   | 0,96 | No  |

|                    |           |              |           |          |          |               |      |     |
|--------------------|-----------|--------------|-----------|----------|----------|---------------|------|-----|
| ENSMUSG00000035984 | 2,57E+00  | -2,963293044 | 2,56E+00  | 1,10E-01 | 4,06E-01 | Nme5          | 5,93 | No  |
| ENSMUSG00000035992 | -8,85E-04 | 6,748905577  | 2,05E-04  | 9,89E-01 | 1,00E+00 | Fnip1         | 1,00 | No  |
| ENSMUSG00000036002 | 1,06E-01  | 5,77267373   | 2,52E+00  | 1,12E-01 | 4,13E-01 | Fam214b       | 1,08 | No  |
| ENSMUSG00000036006 | -3,37E-01 | 0,46460144   | 1,93E+00  | 1,65E-01 | 5,18E-01 | Ripor2        | 0,79 | No  |
| ENSMUSG00000036009 | 2,35E-01  | 2,271598146  | 2,75E+00  | 9,70E-02 | 3,89E-01 | Mettl25       | 1,18 | No  |
| ENSMUSG00000036019 | -3,19E-01 | 3,817119986  | 1,24E+01  | 4,35E-04 | 8,16E-03 | Tmtc2         | 0,80 | Yes |
| ENSMUSG00000036023 | 1,09E-01  | 4,778256773  | 2,01E+00  | 1,57E-01 | 5,01E-01 | Parp2         | 1,08 | No  |
| ENSMUSG00000036026 | -7,43E-02 | 4,751273234  | 9,27E-01  | 3,36E-01 | 6,37E-01 | Tmem63b       | 0,95 | No  |
| ENSMUSG00000036036 | 7,81E-01  | -1,267998559 | 2,26E+00  | 1,33E-01 | 4,59E-01 | Zfp57         | 1,72 | No  |
| ENSMUSG00000036040 | 1,85E+00  | -3,107657832 | 1,35E+00  | 2,46E-01 | 5,50E-01 | Adamts12      | 3,61 | No  |
| ENSMUSG00000036045 | 4,27E-04  | 1,724164142  | 6,53E-06  | 9,98E-01 | 1,00E+00 | Gm12221       | 1,00 | No  |
| ENSMUSG00000036046 | 6,37E-02  | 8,383171778  | 1,22E+00  | 2,69E-01 | 5,65E-01 | 5031439G07Rik | 1,05 | No  |
| ENSMUSG00000036052 | 1,60E-01  | 3,591094035  | 2,70E+00  | 1,00E-01 | 3,92E-01 | Dnajb5        | 1,12 | No  |
| ENSMUSG00000036053 | -2,88E-01 | 5,809718137  | 1,90E+01  | 1,34E-05 | 4,35E-04 | Fmnl2         | 0,82 | Yes |
| ENSMUSG00000036054 | 9,89E-02  | 5,13564887   | 1,88E+00  | 1,70E-01 | 5,26E-01 | Sugp2         | 1,07 | No  |
| ENSMUSG00000036057 | 6,95E-03  | 6,324609078  | 1,20E-02  | 9,13E-01 | 1,00E+00 | Ptpn23        | 1,00 | No  |
| ENSMUSG00000036061 | -3,23E-02 | 2,587363278  | 7,04E-02  | 7,91E-01 | 9,55E-01 | Smug1         | 0,98 | No  |
| ENSMUSG00000036062 | -9,78E-01 | 2,99731785   | 7,40E+01  | 7,66E-18 | 1,51E-15 | Phf24         | 0,51 | Yes |
| ENSMUSG00000036067 | -3,01E-01 | 7,288581903  | 2,54E+01  | 4,73E-07 | 2,26E-05 | Slc2a6        | 0,81 | Yes |
| ENSMUSG00000036073 | 4,26E-02  | 3,972099441  | 2,26E-01  | 6,34E-01 | 8,66E-01 | Galt          | 1,03 | No  |
| ENSMUSG00000036078 | 2,54E-01  | 5,922821387  | 1,46E+01  | 1,31E-04 | 3,04E-03 | Sigmar1       | 1,19 | Yes |
| ENSMUSG00000036086 | 3,98E-01  | 6,086846654  | 3,73E+01  | 1,01E-09 | 8,27E-08 | Zranb3        | 1,32 | Yes |
| ENSMUSG00000036087 | -8,00E-02 | 6,273469375  | 1,57E+00  | 2,10E-01 | 5,50E-01 | Slain2        | 0,95 | No  |
| ENSMUSG00000036091 | -1,66E-01 | -0,077684653 | 2,90E-01  | 5,90E-01 | 8,41E-01 | Hyal3         | 0,89 | No  |
| ENSMUSG00000036093 | -2,85E-01 | 7,711445438  | 2,36E+01  | 1,22E-06 | 5,28E-05 | Arl5a         | 0,82 | Yes |
| ENSMUSG00000036097 | 1,64E-01  | 5,740613381  | 5,95E+00  | 1,47E-02 | 1,24E-01 | Slf2          | 1,12 | No  |
| ENSMUSG00000036098 | 2,26E-01  | 6,537932735  | 1,30E+01  | 3,08E-04 | 6,17E-03 | Myrf          | 1,17 | Yes |
| ENSMUSG00000036099 | 1,53E-01  | 4,893827387  | 4,16E+00  | 4,13E-02 | 2,41E-01 | Vezt          | 1,11 | No  |
| ENSMUSG00000036103 | 1,79E-01  | 3,694031192  | 3,61E+00  | 5,73E-02 | 2,95E-01 | Colec12       | 1,13 | No  |
| ENSMUSG00000036104 | 1,35E-01  | 5,204874378  | 3,50E+00  | 6,14E-02 | 3,08E-01 | Rab3gap1      | 1,10 | No  |
| ENSMUSG00000036106 | -1,44E-01 | 2,203382136  | 1,08E+00  | 2,99E-01 | 5,95E-01 | Prr5          | 0,90 | No  |
| ENSMUSG00000036110 | 9,01E-03  | -3,107646452 | -5,16E-10 | 1,00E+00 | 1,00E+00 | Slc17a2       | 1,01 | No  |

|                    |           |              |          |          |          |           |      |     |
|--------------------|-----------|--------------|----------|----------|----------|-----------|------|-----|
| ENSMUSG00000036111 | 6,83E-01  | 2,35749316   | 2,50E+01 | 5,75E-07 | 2,70E-05 | Lmo1      | 1,61 | Yes |
| ENSMUSG00000036112 | 3,63E-02  | 6,541735785  | 3,36E-01 | 5,62E-01 | 8,25E-01 | Metap2    | 1,03 | No  |
| ENSMUSG00000036114 | 1,61E-01  | 3,439109779  | 2,52E+00 | 1,13E-01 | 4,13E-01 | Rpp25l    | 1,12 | No  |
| ENSMUSG00000036117 | 2,27E+00  | -3,033667073 | 1,97E+00 | 1,60E-01 | 5,09E-01 | Il5       | 4,82 | No  |
| ENSMUSG00000036120 | -3,34E-02 | 4,572042629  | 1,77E-01 | 6,74E-01 | 8,90E-01 | Rfxank    | 0,98 | No  |
| ENSMUSG00000036123 | -8,05E-01 | -1,998004314 | 1,43E+00 | 2,31E-01 | 5,50E-01 | Slc9a3    | 0,57 | No  |
| ENSMUSG00000036136 | -5,39E-01 | -0,697221389 | 1,91E+00 | 1,67E-01 | 5,20E-01 | Fam110c   | 0,69 | No  |
| ENSMUSG00000036138 | 3,17E-02  | 7,017815516  | 2,73E-01 | 6,01E-01 | 8,47E-01 | Acaa1a    | 1,02 | No  |
| ENSMUSG00000036151 | -6,16E-02 | -2,226285992 | 7,03E-03 | 9,33E-01 | 1,00E+00 | Tm6sf2    | 0,96 | No  |
| ENSMUSG00000036155 | 2,16E-01  | 5,657598403  | 1,00E+01 | 1,56E-03 | 2,30E-02 | Mgat5     | 1,16 | Yes |
| ENSMUSG00000036158 | -3,25E-01 | 1,024087739  | 2,62E+00 | 1,05E-01 | 3,98E-01 | Prickle1  | 0,80 | No  |
| ENSMUSG00000036160 | 1,16E-01  | 4,634571409  | 2,22E+00 | 1,37E-01 | 4,66E-01 | Surf6     | 1,08 | No  |
| ENSMUSG00000036162 | -2,27E-02 | 2,492790664  | 3,08E-02 | 8,61E-01 | 9,96E-01 | Fam219aos | 0,98 | No  |
| ENSMUSG00000036167 | -3,03E-02 | 6,127388659  | 2,20E-01 | 6,39E-01 | 8,69E-01 | Pphln1    | 0,98 | No  |
| ENSMUSG00000036168 | 3,16E-01  | 0,726683029  | 1,81E+00 | 1,79E-01 | 5,39E-01 | Ccdc38    | 1,25 | No  |
| ENSMUSG00000036172 | 6,00E-01  | 3,473164103  | 3,49E+01 | 3,55E-09 | 2,68E-07 | Cd200r3   | 1,52 | Yes |
| ENSMUSG00000036180 | 1,09E-01  | 6,949096273  | 3,21E+00 | 7,33E-02 | 3,44E-01 | Gatad2a   | 1,08 | No  |
| ENSMUSG00000036181 | -1,93E-01 | 8,047057726  | 1,09E+01 | 9,43E-04 | 1,54E-02 | Hist1h1c  | 0,87 | Yes |
| ENSMUSG00000036185 | 5,66E-01  | -1,912573735 | 6,36E-01 | 4,25E-01 | 7,19E-01 | Sapcd1    | 1,48 | No  |
| ENSMUSG00000036186 | 5,83E-03  | -0,424953718 | 2,81E-04 | 9,87E-01 | 1,00E+00 | Fam69b    | 1,00 | No  |
| ENSMUSG00000036188 | 1,90E-01  | 4,263900554  | 5,15E+00 | 2,32E-02 | 1,67E-01 | Ankmy2    | 1,14 | No  |
| ENSMUSG00000036196 | 6,13E-01  | -2,448673268 | 4,20E-01 | 5,17E-01 | 7,98E-01 | Slc26a8   | 1,53 | No  |
| ENSMUSG00000036197 | 6,67E-02  | 6,009278468  | 1,04E+00 | 3,08E-01 | 6,06E-01 | Gxylt1    | 1,05 | No  |
| ENSMUSG00000036199 | -5,63E-02 | 5,727582024  | 7,00E-01 | 4,03E-01 | 7,01E-01 | Ndufa13   | 0,96 | No  |
| ENSMUSG00000036202 | 1,54E-01  | 5,343440466  | 4,76E+00 | 2,91E-02 | 1,94E-01 | Rif1      | 1,11 | No  |
| ENSMUSG00000036206 | -6,39E-01 | 5,741273012  | 9,15E+01 | 1,14E-21 | 3,07E-19 | Sh3bp4    | 0,64 | Yes |
| ENSMUSG00000036208 | 1,52E-02  | 4,826016235  | 3,99E-02 | 8,42E-01 | 9,84E-01 | Nepro     | 1,01 | No  |
| ENSMUSG00000036211 | -2,28E+00 | -2,497495997 | 4,25E+00 | 3,94E-02 | 2,35E-01 | Hist1h1t  | 0,21 | No  |
| ENSMUSG00000036214 | 8,97E-02  | 0,028134696  | 9,96E-02 | 7,52E-01 | 9,32E-01 | Znrd1as   | 1,06 | No  |
| ENSMUSG00000036216 | -7,61E-02 | -2,963237265 | 2,63E-03 | 9,59E-01 | 1,00E+00 | Leap2     | 0,95 | No  |
| ENSMUSG00000036218 | -2,74E+00 | -3,033596063 | 2,99E+00 | 8,38E-02 | 3,71E-01 | Pdzrn4    | 0,15 | No  |
| ENSMUSG00000036223 | 2,21E-01  | 2,739303629  | 3,18E+00 | 7,46E-02 | 3,47E-01 | Ska1      | 1,17 | No  |

|                    |           |              |           |          |          |               |      |     |
|--------------------|-----------|--------------|-----------|----------|----------|---------------|------|-----|
| ENSMUSG00000036225 | 1,31E-01  | 1,22544944   | 4,60E-01  | 4,98E-01 | 7,83E-01 | Kctd1         | 1,10 | No  |
| ENSMUSG00000036231 | 9,01E-03  | -3,107646452 | -5,16E-10 | 1,00E+00 | 1,00E+00 | Agr3          | 1,01 | No  |
| ENSMUSG00000036241 | -1,51E-01 | 6,583690096  | 5,85E+00  | 1,56E-02 | 1,29E-01 | Ube2r2        | 0,90 | No  |
| ENSMUSG00000036246 | 4,02E-02  | 6,913151754  | 4,34E-01  | 5,10E-01 | 7,93E-01 | Gmip          | 1,03 | No  |
| ENSMUSG00000036249 | 1,61E-01  | 4,628979454  | 4,17E+00  | 4,11E-02 | 2,41E-01 | Rbm43         | 1,12 | No  |
| ENSMUSG00000036251 | 1,22E+00  | -3,107637583 | 6,82E-01  | 4,09E-01 | 7,05E-01 | Trpm8         | 2,33 | No  |
| ENSMUSG00000036256 | -4,81E-02 | -0,241703713 | 2,32E-02  | 8,79E-01 | 1,00E+00 | Igfbp7        | 0,97 | No  |
| ENSMUSG00000036257 | -1,18E-01 | 6,20681708   | 3,38E+00  | 6,62E-02 | 3,23E-01 | Pnpla8        | 0,92 | No  |
| ENSMUSG00000036264 | -4,13E-01 | 0,002077608  | 1,86E+00  | 1,73E-01 | 5,30E-01 | Fstl4         | 0,75 | No  |
| ENSMUSG00000036270 | -4,44E-02 | 6,206380032  | 4,78E-01  | 4,90E-01 | 7,76E-01 | Edc4          | 0,97 | No  |
| ENSMUSG00000036273 | 1,55E-01  | 5,803330575  | 5,43E+00  | 1,98E-02 | 1,50E-01 | Lrrk2         | 1,11 | No  |
| ENSMUSG00000036275 | -2,15E-02 | 7,438958533  | 1,31E-01  | 7,18E-01 | 9,14E-01 | 9530068E07Rik | 0,99 | No  |
| ENSMUSG00000036278 | -9,05E-02 | 2,221702992  | 4,07E-01  | 5,23E-01 | 8,01E-01 | Macrodl       | 0,94 | No  |
| ENSMUSG00000036281 | 2,42E-01  | 4,59527058   | 9,33E+00  | 2,26E-03 | 3,08E-02 | Snapc4        | 1,18 | Yes |
| ENSMUSG00000036282 | -4,24E-03 | 4,554921707  | 2,89E-03  | 9,57E-01 | 1,00E+00 | Naa30         | 1,00 | No  |
| ENSMUSG00000036285 | 1,79E-01  | 3,95951227   | 4,05E+00  | 4,41E-02 | 2,50E-01 | Noa1          | 1,13 | No  |
| ENSMUSG00000036291 | 7,30E-02  | 4,36419067   | 7,93E-01  | 3,73E-01 | 6,74E-01 | Ap5m1         | 1,05 | No  |
| ENSMUSG00000036292 | 4,22E-02  | 0,804501506  | 3,80E-02  | 8,46E-01 | 9,87E-01 | Gramd1c       | 1,03 | No  |
| ENSMUSG00000036295 | 1,23E+00  | -2,548267169 | 9,43E-01  | 3,31E-01 | 6,32E-01 | Lrrn3         | 2,35 | No  |
| ENSMUSG00000036298 | -1,72E+00 | -2,770605246 | 2,06E+00  | 1,51E-01 | 4,93E-01 | Slc2a13       | 0,30 | No  |
| ENSMUSG00000036299 | -4,70E-02 | 5,813376895  | 4,93E-01  | 4,83E-01 | 7,70E-01 | BC031181      | 0,97 | No  |
| ENSMUSG00000036304 | 4,90E-01  | -0,574148784 | 1,62E+00  | 2,03E-01 | 5,50E-01 | Zdhhc23       | 1,40 | No  |
| ENSMUSG00000036305 | -2,51E-01 | 8,292113827  | 1,89E+01  | 1,40E-05 | 4,52E-04 | Rpl39-ps      | 0,84 | Yes |
| ENSMUSG00000036306 | 3,46E-01  | 0,752940535  | 2,19E+00  | 1,39E-01 | 4,71E-01 | Lzts1         | 1,27 | No  |
| ENSMUSG00000036309 | -4,01E-02 | 5,802124126  | 3,60E-01  | 5,48E-01 | 8,16E-01 | Skp1a         | 0,97 | No  |
| ENSMUSG00000036315 | 1,11E-01  | 3,272123731  | 1,09E+00  | 2,96E-01 | 5,92E-01 | Znrd1         | 1,08 | No  |
| ENSMUSG00000036322 | 2,21E-01  | -2,311205448 | 6,13E-02  | 8,04E-01 | 9,63E-01 | H2-Ea-ps      | 1,17 | No  |
| ENSMUSG00000036323 | -2,84E-02 | 6,93212837   | 2,17E-01  | 6,41E-01 | 8,71E-01 | Srp72         | 0,98 | No  |
| ENSMUSG00000036327 | 2,51E-01  | 3,372954248  | 6,08E+00  | 1,37E-02 | 1,18E-01 | Qsox2         | 1,19 | No  |
| ENSMUSG00000036330 | -1,36E-01 | 2,507047204  | 1,14E+00  | 2,85E-01 | 5,81E-01 | Slc18a1       | 0,91 | No  |
| ENSMUSG00000036333 | -3,23E-02 | 7,722772398  | 3,03E-01  | 5,82E-01 | 8,38E-01 | Kidins220     | 0,98 | No  |
| ENSMUSG00000036334 | -2,55E-01 | -0,484991397 | 5,30E-01  | 4,67E-01 | 7,55E-01 | Igsf10        | 0,84 | No  |

|                    |           |              |          |          |          |               |      |     |
|--------------------|-----------|--------------|----------|----------|----------|---------------|------|-----|
| ENSMUSG00000036339 | 1,42E-01  | 5,201631263  | 3,89E+00 | 4,85E-02 | 2,65E-01 | Tmem260       | 1,10 | No  |
| ENSMUSG00000036352 | -7,96E-02 | 4,762279109  | 1,08E+00 | 2,99E-01 | 5,95E-01 | Ubac1         | 0,95 | No  |
| ENSMUSG00000036353 | 1,62E-02  | 3,117154647  | 2,16E-02 | 8,83E-01 | 1,00E+00 | P2ry12        | 1,01 | No  |
| ENSMUSG00000036356 | -1,08E+00 | 1,164396554  | 3,15E+01 | 2,04E-08 | 1,33E-06 | Csgalnact1    | 0,47 | Yes |
| ENSMUSG00000036362 | -1,06E-01 | 4,873543448  | 1,99E+00 | 1,59E-01 | 5,06E-01 | P2ry13        | 0,93 | No  |
| ENSMUSG00000036368 | -2,85E-01 | 1,844647622  | 3,46E+00 | 6,29E-02 | 3,13E-01 | Rmdn2         | 0,82 | No  |
| ENSMUSG00000036371 | -5,60E-03 | 7,967867603  | 9,25E-03 | 9,23E-01 | 1,00E+00 | Serbp1        | 1,00 | No  |
| ENSMUSG00000036372 | -2,97E-02 | 4,996843601  | 1,62E-01 | 6,87E-01 | 8,98E-01 | Tmem258       | 0,98 | No  |
| ENSMUSG00000036376 | 2,34E-02  | 3,956811566  | 6,74E-02 | 7,95E-01 | 9,57E-01 | Abt1          | 1,02 | No  |
| ENSMUSG00000036377 | -8,35E-01 | -0,740673293 | 4,85E+00 | 2,77E-02 | 1,88E-01 | C530008M17Rik | 0,56 | No  |
| ENSMUSG00000036381 | 4,85E-02  | 7,404373611  | 6,64E-01 | 4,15E-01 | 7,10E-01 | P2ry14        | 1,03 | No  |
| ENSMUSG00000036390 | -2,50E-01 | 4,289474418  | 9,02E+00 | 2,67E-03 | 3,50E-02 | Gadd45a       | 0,84 | Yes |
| ENSMUSG00000036391 | 1,24E-01  | 6,081460804  | 3,62E+00 | 5,70E-02 | 2,94E-01 | Sec24a        | 1,09 | No  |
| ENSMUSG00000036395 | 6,93E-01  | -0,621080481 | 3,53E+00 | 6,02E-02 | 3,04E-01 | Glb1l2        | 1,62 | No  |
| ENSMUSG00000036398 | -5,31E-02 | 4,943490425  | 5,05E-01 | 4,77E-01 | 7,65E-01 | Ppp1r11       | 0,96 | No  |
| ENSMUSG00000036402 | 6,23E-02  | 6,949455321  | 1,05E+00 | 3,06E-01 | 6,03E-01 | Gng12         | 1,04 | No  |
| ENSMUSG00000036403 | -3,99E-02 | 4,456944399  | 2,44E-01 | 6,21E-01 | 8,57E-01 | Cep135        | 0,97 | No  |
| ENSMUSG00000036411 | -2,92E-01 | -0,131421004 | 8,10E-01 | 3,68E-01 | 6,69E-01 | 9530077C05Rik | 0,82 | No  |
| ENSMUSG00000036412 | -5,13E-01 | -1,146012488 | 1,07E+00 | 3,02E-01 | 5,98E-01 | Arsi          | 0,70 | No  |
| ENSMUSG00000036427 | 1,18E-01  | 7,919697604  | 4,06E+00 | 4,40E-02 | 2,50E-01 | Gpi1          | 1,08 | No  |
| ENSMUSG00000036430 | 9,63E-02  | 3,640859666  | 1,02E+00 | 3,13E-01 | 6,13E-01 | Tbcc          | 1,07 | No  |
| ENSMUSG00000036432 | 2,55E-01  | 5,855240123  | 1,46E+01 | 1,34E-04 | 3,09E-03 | Siah2         | 1,19 | Yes |
| ENSMUSG00000036435 | 6,27E-02  | 6,381939497  | 9,83E-01 | 3,22E-01 | 6,22E-01 | Exoc1         | 1,04 | No  |
| ENSMUSG00000036437 | -1,13E+00 | -1,800968412 | 3,80E+00 | 5,12E-02 | 2,75E-01 | Npy1r         | 0,46 | No  |
| ENSMUSG00000036438 | -3,93E-02 | 7,626714692  | 4,44E-01 | 5,05E-01 | 7,90E-01 | Calm2         | 0,97 | No  |
| ENSMUSG00000036442 | 6,20E-03  | 4,745744706  | 6,54E-03 | 9,36E-01 | 1,00E+00 | Thap11        | 1,00 | No  |
| ENSMUSG00000036446 | -3,22E+00 | -2,963202658 | 4,38E+00 | 3,63E-02 | 2,26E-01 | Lum           | 0,11 | No  |
| ENSMUSG00000036449 | -1,64E+00 | -0,485023899 | 2,13E+01 | 4,02E-06 | 1,50E-04 | Lcn8          | 0,32 | Yes |
| ENSMUSG00000036450 | 2,80E-02  | 5,875390373  | 1,79E-01 | 6,72E-01 | 8,89E-01 | Hif1an        | 1,02 | No  |
| ENSMUSG00000036452 | 3,12E-01  | 5,932763827  | 2,22E+01 | 2,44E-06 | 9,67E-05 | Arhgap26      | 1,24 | Yes |
| ENSMUSG00000036459 | -3,09E-01 | 3,676082911  | 1,07E+01 | 1,08E-03 | 1,72E-02 | Wtip          | 0,81 | Yes |
| ENSMUSG00000036461 | 9,79E-02  | 6,356048296  | 2,40E+00 | 1,21E-01 | 4,34E-01 | Elf1          | 1,07 | No  |

|                    |           |              |          |          |          |          |      |     |
|--------------------|-----------|--------------|----------|----------|----------|----------|------|-----|
| ENSMUSG00000036466 | 1,69E-01  | 1,530196286  | 9,32E-01 | 3,34E-01 | 6,35E-01 | Megf11   | 1,12 | No  |
| ENSMUSG00000036469 | 2,52E-01  | 7,116207288  | 1,74E+01 | 2,98E-05 | 8,68E-04 | March1   | 1,19 | Yes |
| ENSMUSG00000036473 | 1,11E-01  | 5,144055201  | 2,36E+00 | 1,24E-01 | 4,41E-01 | Tbc1d24  | 1,08 | No  |
| ENSMUSG00000036478 | -2,37E-01 | 10,4105796   | 1,78E+01 | 2,40E-05 | 7,25E-04 | Btg1     | 0,85 | Yes |
| ENSMUSG00000036480 | 1,88E+00  | -2,963229875 | 1,37E+00 | 2,42E-01 | 5,50E-01 | Prss56   | 3,68 | No  |
| ENSMUSG00000036492 | -2,03E+00 | -2,497594719 | 3,14E+00 | 7,65E-02 | 3,53E-01 | Rnf39    | 0,24 | No  |
| ENSMUSG00000036499 | 1,46E-01  | 7,107816466  | 5,86E+00 | 1,55E-02 | 1,29E-01 | Eea1     | 1,11 | No  |
| ENSMUSG00000036500 | -1,94E+00 | -3,107619243 | 1,50E+00 | 2,21E-01 | 5,50E-01 | Akp3     | 0,26 | No  |
| ENSMUSG00000036501 | -4,52E-02 | 5,765629582  | 4,57E-01 | 4,99E-01 | 7,84E-01 | Fam13b   | 0,97 | No  |
| ENSMUSG00000036503 | 5,75E-02  | 6,933303591  | 8,88E-01 | 3,46E-01 | 6,47E-01 | Rnf13    | 1,04 | No  |
| ENSMUSG00000036504 | -9,75E-02 | 1,778724345  | 3,63E-01 | 5,47E-01 | 8,14E-01 | Phpt1    | 0,93 | No  |
| ENSMUSG00000036513 | 1,07E-01  | 4,798402247  | 1,97E+00 | 1,61E-01 | 5,09E-01 | Commd2   | 1,08 | No  |
| ENSMUSG00000036523 | 7,18E-01  | 1,464339456  | 1,51E+01 | 1,00E-04 | 2,42E-03 | Greb1    | 1,64 | Yes |
| ENSMUSG00000036526 | -2,71E-02 | 6,186635965  | 1,78E-01 | 6,73E-01 | 8,90E-01 | Card11   | 0,98 | No  |
| ENSMUSG00000036528 | -2,94E-01 | 5,613899588  | 1,86E+01 | 1,63E-05 | 5,17E-04 | Ppfibp2  | 0,82 | Yes |
| ENSMUSG00000036529 | 2,44E-02  | 7,100415922  | 1,64E-01 | 6,85E-01 | 8,97E-01 | Sbf1     | 1,02 | No  |
| ENSMUSG00000036533 | 1,40E-01  | 4,116106034  | 2,66E+00 | 1,03E-01 | 3,95E-01 | Cdc42ep3 | 1,10 | No  |
| ENSMUSG00000036534 | 2,21E-01  | 5,599269296  | 1,04E+01 | 1,25E-03 | 1,94E-02 | Slc38a7  | 1,17 | Yes |
| ENSMUSG00000036545 | -7,46E-02 | -1,600583707 | 1,43E-02 | 9,05E-01 | 1,00E+00 | Adamts2  | 0,95 | No  |
| ENSMUSG00000036550 | -1,93E-03 | 7,871280118  | 1,09E-03 | 9,74E-01 | 1,00E+00 | Cnot1    | 1,00 | No  |
| ENSMUSG00000036552 | -9,84E-02 | 4,385974387  | 1,47E+00 | 2,25E-01 | 5,50E-01 | Ermard   | 0,93 | No  |
| ENSMUSG00000036553 | 3,78E-01  | 6,904012221  | 3,80E+01 | 7,18E-10 | 6,01E-08 | Sh3tc1   | 1,30 | Yes |
| ENSMUSG00000036555 | 1,21E-03  | 4,720520426  | 2,49E-04 | 9,87E-01 | 1,00E+00 | lqce     | 1,00 | No  |
| ENSMUSG00000036557 | -1,17E+00 | -2,448682833 | 1,78E+00 | 1,82E-01 | 5,43E-01 | Stpg4    | 0,44 | No  |
| ENSMUSG00000036560 | -3,02E-01 | 2,457910573  | 5,66E+00 | 1,73E-02 | 1,38E-01 | Lgi4     | 0,81 | No  |
| ENSMUSG00000036561 | 5,24E-02  | 3,505755155  | 2,81E-01 | 5,96E-01 | 8,45E-01 | Ppp6r2   | 1,04 | No  |
| ENSMUSG00000036564 | -1,16E+00 | 2,968187851  | 1,07E+02 | 4,14E-25 | 1,44E-22 | Ndrg4    | 0,45 | Yes |
| ENSMUSG00000036565 | -2,28E-01 | 7,816714893  | 1,52E+01 | 9,89E-05 | 2,40E-03 | Ttyh3    | 0,85 | Yes |
| ENSMUSG00000036568 | 3,27E-02  | 4,906989322  | 1,92E-01 | 6,62E-01 | 8,83E-01 | Bicral   | 1,02 | No  |
| ENSMUSG00000036570 | -1,15E+00 | -1,997929821 | 2,17E+00 | 1,41E-01 | 4,75E-01 | Fxyd1    | 0,45 | No  |
| ENSMUSG00000036578 | -6,33E-01 | -2,268074525 | 5,45E-01 | 4,60E-01 | 7,49E-01 | Fxyd7    | 0,64 | No  |
| ENSMUSG00000036580 | 1,12E-01  | 3,904471366  | 1,54E+00 | 2,14E-01 | 5,50E-01 | Spg20    | 1,08 | No  |

|                    |           |              |          |          |          |          |      |     |
|--------------------|-----------|--------------|----------|----------|----------|----------|------|-----|
| ENSMUSG00000036585 | -9,13E-01 | 1,345307848  | 2,67E+01 | 2,39E-07 | 1,24E-05 | Fgf1     | 0,53 | Yes |
| ENSMUSG00000036586 | -1,89E+00 | -3,1076441   | 1,42E+00 | 2,33E-01 | 5,50E-01 | Grifin   | 0,27 | No  |
| ENSMUSG00000036587 | 3,37E-03  | 3,183675269  | 9,97E-04 | 9,75E-01 | 1,00E+00 | Fut7     | 1,00 | No  |
| ENSMUSG00000036591 | 6,06E-02  | 6,343021754  | 9,06E-01 | 3,41E-01 | 6,42E-01 | Arhgap21 | 1,04 | No  |
| ENSMUSG00000036594 | -4,93E-02 | 11,60426104  | 7,79E-01 | 3,77E-01 | 6,78E-01 | H2-Aa    | 0,97 | No  |
| ENSMUSG00000036598 | -2,71E+00 | -3,033620915 | 2,92E+00 | 8,75E-02 | 3,78E-01 | Ccdc113  | 0,15 | No  |
| ENSMUSG00000036599 | 9,87E-02  | 5,181425375  | 1,88E+00 | 1,70E-01 | 5,26E-01 | Chst12   | 1,07 | No  |
| ENSMUSG00000036602 | 1,85E+00  | -3,107657832 | 1,35E+00 | 2,46E-01 | 5,50E-01 | Alx1     | 3,61 | No  |
| ENSMUSG00000036606 | 2,12E-01  | 7,005315999  | 1,20E+01 | 5,19E-04 | 9,46E-03 | Plxnb2   | 1,16 | Yes |
| ENSMUSG00000036611 | -2,36E-02 | 6,207382994  | 1,34E-01 | 7,15E-01 | 9,12E-01 | Eepd1    | 0,98 | No  |
| ENSMUSG00000036613 | -1,39E-01 | 5,579950249  | 4,19E+00 | 4,05E-02 | 2,38E-01 | Tssc1    | 0,91 | No  |
| ENSMUSG00000036615 | 8,25E-02  | 3,949188455  | 8,26E-01 | 3,63E-01 | 6,64E-01 | Rfxap    | 1,06 | No  |
| ENSMUSG00000036617 | -2,54E-01 | 4,110049135  | 8,83E+00 | 2,97E-03 | 3,81E-02 | Etl4     | 0,84 | Yes |
| ENSMUSG00000036620 | 6,48E-02  | 6,017906642  | 9,84E-01 | 3,21E-01 | 6,22E-01 | Mgat4b   | 1,05 | No  |
| ENSMUSG00000036622 | 3,45E-01  | 7,372050576  | 3,33E+01 | 7,70E-09 | 5,46E-07 | Atp13a2  | 1,27 | Yes |
| ENSMUSG00000036632 | 1,10E-01  | 4,319554914  | 1,72E+00 | 1,89E-01 | 5,50E-01 | Alg5     | 1,08 | No  |
| ENSMUSG00000036634 | 1,20E-01  | 3,902146419  | 1,75E+00 | 1,86E-01 | 5,50E-01 | Mag      | 1,09 | No  |
| ENSMUSG00000036636 | 1,87E-01  | 7,506317485  | 1,00E+01 | 1,55E-03 | 2,29E-02 | Clcn7    | 1,14 | Yes |
| ENSMUSG00000036639 | -1,16E-01 | 3,309511864  | 1,26E+00 | 2,61E-01 | 5,55E-01 | Nudt1    | 0,92 | No  |
| ENSMUSG00000036641 | 3,44E-01  | -1,070238865 | 5,08E-01 | 4,76E-01 | 7,64E-01 | Ccdc148  | 1,27 | No  |
| ENSMUSG00000036644 | 3,88E-02  | 7,049836601  | 4,12E-01 | 5,21E-01 | 8,00E-01 | Tbc1d9b  | 1,03 | No  |
| ENSMUSG00000036646 | -3,35E-02 | 6,605532425  | 2,90E-01 | 5,90E-01 | 8,41E-01 | Man1b1   | 0,98 | No  |
| ENSMUSG00000036655 | 1,24E+00  | -2,770581513 | 9,58E-01 | 3,28E-01 | 6,29E-01 | Colec11  | 2,37 | No  |
| ENSMUSG00000036661 | -3,62E-02 | 6,250321017  | 3,22E-01 | 5,71E-01 | 8,31E-01 | Dennd3   | 0,98 | No  |
| ENSMUSG00000036667 | 2,65E-01  | 4,391500408  | 1,03E+01 | 1,35E-03 | 2,06E-02 | Tcaf1    | 1,20 | Yes |
| ENSMUSG00000036672 | 5,79E-02  | 4,346019508  | 4,90E-01 | 4,84E-01 | 7,71E-01 | Cenpt    | 1,04 | No  |
| ENSMUSG00000036676 | 1,67E-01  | 4,831057424  | 4,83E+00 | 2,80E-02 | 1,89E-01 | Tmtc3    | 1,12 | No  |
| ENSMUSG00000036678 | -2,73E-02 | 4,462810251  | 1,14E-01 | 7,36E-01 | 9,24E-01 | Aaas     | 0,98 | No  |
| ENSMUSG00000036686 | -4,34E-02 | 4,99932941   | 3,48E-01 | 5,55E-01 | 8,20E-01 | Cc2d1a   | 0,97 | No  |
| ENSMUSG00000036687 | 9,84E-03  | 0,25165739   | 1,23E-03 | 9,72E-01 | 1,00E+00 | Tmem184a | 1,01 | No  |
| ENSMUSG00000036693 | 1,69E-02  | 4,860610212  | 4,93E-02 | 8,24E-01 | 9,73E-01 | Nop14    | 1,01 | No  |
| ENSMUSG00000036698 | -5,50E-02 | 7,862127025  | 8,87E-01 | 3,46E-01 | 6,47E-01 | Ago2     | 0,96 | No  |

|                    |           |              |          |          |          |          |      |     |
|--------------------|-----------|--------------|----------|----------|----------|----------|------|-----|
| ENSMUSG00000036707 | -5,84E-02 | 7,811141109  | 9,96E-01 | 3,18E-01 | 6,19E-01 | Cab39    | 0,96 | No  |
| ENSMUSG00000036712 | -1,26E-01 | 6,669742213  | 4,15E+00 | 4,16E-02 | 2,42E-01 | Cyld     | 0,92 | No  |
| ENSMUSG00000036718 | -1,75E-01 | 4,161645437  | 4,12E+00 | 4,24E-02 | 2,45E-01 | Micall2  | 0,89 | No  |
| ENSMUSG00000036721 | -4,42E-01 | 3,25889007   | 1,79E+01 | 2,38E-05 | 7,22E-04 | Zscan12  | 0,74 | Yes |
| ENSMUSG00000036731 | -2,67E+00 | -2,963242888 | 2,84E+00 | 9,21E-02 | 3,82E-01 | Cysrt1   | 0,16 | No  |
| ENSMUSG00000036733 | -3,80E-02 | 5,564622653  | 3,09E-01 | 5,78E-01 | 8,36E-01 | Rbm42    | 0,97 | No  |
| ENSMUSG00000036737 | 7,55E-02  | 6,160315443  | 1,37E+00 | 2,42E-01 | 5,50E-01 | Oxsr1    | 1,05 | No  |
| ENSMUSG00000036743 | 8,68E-02  | 1,441555703  | 2,36E-01 | 6,27E-01 | 8,61E-01 | Psmas8   | 1,06 | No  |
| ENSMUSG00000036744 | -7,02E-02 | -2,71172505  | 3,32E-03 | 9,54E-01 | 1,00E+00 | Olfir701 | 0,95 | No  |
| ENSMUSG00000036745 | 1,02E-01  | -1,896217054 | 2,05E-02 | 8,86E-01 | 1,00E+00 | Ttll7    | 1,07 | No  |
| ENSMUSG00000036748 | -4,37E-02 | 5,608914577  | 4,09E-01 | 5,23E-01 | 8,01E-01 | Cuedc2   | 0,97 | No  |
| ENSMUSG00000036751 | -3,08E-02 | 6,692478021  | 2,47E-01 | 6,19E-01 | 8,56E-01 | Cox6b1   | 0,98 | No  |
| ENSMUSG00000036752 | 7,83E-02  | 7,454332143  | 1,74E+00 | 1,88E-01 | 5,50E-01 | Tubb4b   | 1,06 | No  |
| ENSMUSG00000036764 | -5,12E-01 | 3,444766066  | 2,66E+01 | 2,55E-07 | 1,30E-05 | Dnajc12  | 0,70 | Yes |
| ENSMUSG00000036766 | -6,88E-01 | -1,655149523 | 1,35E+00 | 2,45E-01 | 5,50E-01 | Dner     | 0,62 | No  |
| ENSMUSG00000036768 | 1,97E-01  | 5,497514965  | 8,09E+00 | 4,46E-03 | 5,12E-02 | Kif15    | 1,15 | No  |
| ENSMUSG00000036770 | -8,60E-01 | -2,896084029 | 4,06E-01 | 5,24E-01 | 8,01E-01 | Stpg3    | 0,55 | No  |
| ENSMUSG00000036775 | -2,20E-01 | 4,361556602  | 7,17E+00 | 7,43E-03 | 7,49E-02 | Decr2    | 0,86 | No  |
| ENSMUSG00000036777 | 3,74E-01  | 5,754820982  | 3,09E+01 | 2,78E-08 | 1,74E-06 | Anln     | 1,30 | Yes |
| ENSMUSG00000036779 | 5,76E-02  | 5,772238917  | 7,41E-01 | 3,89E-01 | 6,90E-01 | Papd5    | 1,04 | No  |
| ENSMUSG00000036781 | -1,99E-01 | 5,765333938  | 8,78E+00 | 3,05E-03 | 3,87E-02 | Rps27l   | 0,87 | Yes |
| ENSMUSG00000036792 | -2,65E-02 | 4,52745595   | 1,10E-01 | 7,40E-01 | 9,26E-01 | Mbd5     | 0,98 | No  |
| ENSMUSG00000036805 | -3,16E+00 | -2,963246013 | 4,20E+00 | 4,04E-02 | 2,38E-01 | Noxa1    | 0,11 | No  |
| ENSMUSG00000036810 | 4,27E-02  | 4,82501501   | 3,16E-01 | 5,74E-01 | 8,33E-01 | Cnep1r1  | 1,03 | No  |
| ENSMUSG00000036813 | -1,92E+00 | -3,0336536   | 1,46E+00 | 2,27E-01 | 5,50E-01 | Entpd8   | 0,26 | No  |
| ENSMUSG00000036814 | -5,67E-01 | -0,8585805   | 1,99E+00 | 1,58E-01 | 5,05E-01 | Slc6a20a | 0,67 | No  |
| ENSMUSG00000036815 | -9,93E-01 | 0,345040712  | 1,52E+01 | 9,93E-05 | 2,41E-03 | Dpp10    | 0,50 | Yes |
| ENSMUSG00000036817 | 8,15E-02  | 5,654998762  | 1,44E+00 | 2,31E-01 | 5,50E-01 | Sun1     | 1,06 | No  |
| ENSMUSG00000036819 | -3,00E-02 | 3,178476971  | 7,94E-02 | 7,78E-01 | 9,47E-01 | Jmjd4    | 0,98 | No  |
| ENSMUSG00000036820 | 1,76E-01  | 4,9765566    | 5,55E+00 | 1,85E-02 | 1,44E-01 | Amdhd2   | 1,13 | No  |
| ENSMUSG00000036822 | 8,36E-02  | 5,792695638  | 1,56E+00 | 2,11E-01 | 5,50E-01 | Topors   | 1,06 | No  |
| ENSMUSG00000036825 | 3,99E-02  | 3,680650289  | 1,74E-01 | 6,76E-01 | 8,91E-01 | Ssx2ip   | 1,03 | No  |



|                    |           |              |          |          |          |               |      |     |
|--------------------|-----------|--------------|----------|----------|----------|---------------|------|-----|
| ENSMUSG00000036826 | -2,78E-02 | 4,23825067   | 1,10E-01 | 7,40E-01 | 9,26E-01 | Igflr1        | 0,98 | No  |
| ENSMUSG00000036832 | 4,14E-01  | 2,280717704  | 9,19E+00 | 2,43E-03 | 3,27E-02 | Lpar3         | 1,33 | Yes |
| ENSMUSG00000036833 | 1,91E-01  | 7,18055321   | 1,01E+01 | 1,52E-03 | 2,25E-02 | Pnpla7        | 1,14 | Yes |
| ENSMUSG00000036834 | 1,49E-01  | -1,997928891 | 3,85E-02 | 8,44E-01 | 9,86E-01 | Plch1         | 1,11 | No  |
| ENSMUSG00000036835 | -5,92E-02 | 3,33271144   | 3,31E-01 | 5,65E-01 | 8,28E-01 | Psenen        | 0,96 | No  |
| ENSMUSG00000036840 | -3,14E-01 | 3,40856722   | 9,43E+00 | 2,13E-03 | 2,94E-02 | Siah1a        | 0,80 | Yes |
| ENSMUSG00000036845 | 1,77E-01  | 2,963625361  | 2,50E+00 | 1,14E-01 | 4,17E-01 | Lin37         | 1,13 | No  |
| ENSMUSG00000036850 | 7,60E-02  | 4,749173819  | 9,67E-01 | 3,26E-01 | 6,26E-01 | Mrpl41        | 1,05 | No  |
| ENSMUSG00000036853 | 4,18E-01  | 4,429566614  | 2,61E+01 | 3,29E-07 | 1,63E-05 | Mcoln3        | 1,34 | Yes |
| ENSMUSG00000036854 | 1,71E-02  | 2,822558937  | 2,13E-02 | 8,84E-01 | 1,00E+00 | Hspb6         | 1,01 | No  |
| ENSMUSG00000036855 | -2,63E-02 | -3,033641358 | 2,33E-04 | 9,88E-01 | 1,00E+00 | Gjd4          | 0,98 | No  |
| ENSMUSG00000036856 | -1,17E+00 | -1,896120686 | 2,24E+00 | 1,35E-01 | 4,62E-01 | Wnt4          | 0,44 | No  |
| ENSMUSG00000036858 | -8,48E-01 | -2,832006653 | 3,94E-01 | 5,30E-01 | 8,05E-01 | Ptcra         | 0,56 | No  |
| ENSMUSG00000036860 | -1,25E-02 | 3,579574665  | 1,64E-02 | 8,98E-01 | 1,00E+00 | Mrpl55        | 0,99 | No  |
| ENSMUSG00000036862 | 6,47E-01  | 0,508491602  | 7,02E+00 | 8,04E-03 | 7,93E-02 | Dchs1         | 1,57 | No  |
| ENSMUSG00000036863 | 6,21E-01  | 2,953930937  | 2,98E+01 | 4,68E-08 | 2,81E-06 | Syde2         | 1,54 | Yes |
| ENSMUSG00000036864 | 1,42E-01  | 2,127719509  | 1,00E+00 | 3,17E-01 | 6,17E-01 | Proser3       | 1,10 | No  |
| ENSMUSG00000036867 | -4,60E-01 | 1,160486364  | 5,10E+00 | 2,39E-02 | 1,69E-01 | Smad6         | 0,73 | No  |
| ENSMUSG00000036873 | 3,16E-02  | 3,928421661  | 1,22E-01 | 7,27E-01 | 9,19E-01 | 2410004B18Rik | 1,02 | No  |
| ENSMUSG00000036875 | 3,59E-01  | 6,585432869  | 3,29E+01 | 9,76E-09 | 6,80E-07 | Dna2          | 1,28 | Yes |
| ENSMUSG00000036879 | -8,74E-02 | 5,110733518  | 1,45E+00 | 2,29E-01 | 5,50E-01 | Phkb          | 0,94 | No  |
| ENSMUSG00000036880 | 6,22E-02  | 5,363258779  | 7,77E-01 | 3,78E-01 | 6,79E-01 | Acaa2         | 1,04 | No  |
| ENSMUSG00000036882 | 1,90E-01  | 2,771825353  | 2,49E+00 | 1,15E-01 | 4,19E-01 | Arhgap33      | 1,14 | No  |
| ENSMUSG00000036885 | 2,09E-01  | -1,117043812 | 1,95E-01 | 6,59E-01 | 8,81E-01 | Arhgef26      | 1,16 | No  |
| ENSMUSG00000036887 | 7,71E-01  | 6,737337556  | 1,50E+02 | 1,37E-34 | 1,08E-31 | C1qa          | 1,71 | Yes |
| ENSMUSG00000036890 | -2,13E-01 | 2,80551291   | 3,26E+00 | 7,11E-02 | 3,38E-01 | Gtdc1         | 0,86 | No  |
| ENSMUSG00000036893 | -5,26E-02 | 5,895630913  | 6,38E-01 | 4,24E-01 | 7,19E-01 | Ehmt1         | 0,96 | No  |
| ENSMUSG00000036894 | -1,60E-01 | 6,665009249  | 6,74E+00 | 9,41E-03 | 8,93E-02 | Rap2b         | 0,89 | No  |
| ENSMUSG00000036896 | 7,51E-01  | 7,400990925  | 1,55E+02 | 1,53E-35 | 1,28E-32 | C1qc          | 1,68 | Yes |
| ENSMUSG00000036898 | 1,21E-01  | 3,225493621  | 1,32E+00 | 2,50E-01 | 5,50E-01 | Zfp157        | 1,09 | No  |
| ENSMUSG00000036902 | -4,34E-02 | 1,497966622  | 5,88E-02 | 8,08E-01 | 9,65E-01 | Neto2         | 0,97 | No  |
| ENSMUSG00000036904 | 7,22E-01  | -0,669332633 | 3,80E+00 | 5,14E-02 | 2,76E-01 | Fzd8          | 1,65 | No  |

|                    |           |              |          |          |          |               |      |     |
|--------------------|-----------|--------------|----------|----------|----------|---------------|------|-----|
| ENSMUSG00000036905 | 6,34E-01  | 8,41246524   | 1,19E+02 | 8,62E-28 | 3,97E-25 | C1qb          | 1,55 | Yes |
| ENSMUSG00000036908 | 6,12E-03  | 8,848411029  | 1,15E-02 | 9,15E-01 | 1,00E+00 | Unc93b1       | 1,00 | No  |
| ENSMUSG00000036912 | -1,07E+00 | -0,316251648 | 1,08E+01 | 1,01E-03 | 1,63E-02 | Piwil4        | 0,48 | Yes |
| ENSMUSG00000036915 | -2,88E-02 | -2,963268425 | 3,79E-04 | 9,84E-01 | 1,00E+00 | Kirrel2       | 0,98 | No  |
| ENSMUSG00000036918 | 1,08E-01  | 7,112431511  | 3,22E+00 | 7,28E-02 | 3,42E-01 | Ttc7          | 1,08 | No  |
| ENSMUSG00000036923 | -7,17E-01 | -1,448727078 | 1,94E+00 | 1,64E-01 | 5,15E-01 | Stox1         | 0,61 | No  |
| ENSMUSG00000036925 | 4,09E-01  | -2,26807888  | 2,68E-01 | 6,05E-01 | 8,49E-01 | Mucl2         | 1,33 | No  |
| ENSMUSG00000036928 | 1,91E-01  | 0,563307422  | 6,32E-01 | 4,26E-01 | 7,21E-01 | Stag3         | 1,14 | No  |
| ENSMUSG00000036931 | 2,18E-01  | 4,742090516  | 8,00E+00 | 4,69E-03 | 5,32E-02 | Nfkbid        | 1,16 | No  |
| ENSMUSG00000036934 | 2,46E-01  | 2,561884058  | 3,79E+00 | 5,17E-02 | 2,77E-01 | 4921524J17Rik | 1,19 | No  |
| ENSMUSG00000036940 | -6,78E-02 | 5,669241984  | 1,01E+00 | 3,15E-01 | 6,16E-01 | Kdm1a         | 0,95 | No  |
| ENSMUSG00000036941 | -7,43E-02 | 4,824545633  | 9,63E-01 | 3,27E-01 | 6,27E-01 | Elac1         | 0,95 | No  |
| ENSMUSG00000036943 | -1,56E-01 | 8,659194002  | 7,46E+00 | 6,32E-03 | 6,67E-02 | Rab8b         | 0,90 | No  |
| ENSMUSG00000036944 | 1,14E-01  | 3,851135545  | 1,54E+00 | 2,15E-01 | 5,50E-01 | Tmem71        | 1,08 | No  |
| ENSMUSG00000036948 | 1,52E-01  | 5,574067838  | 4,94E+00 | 2,62E-02 | 1,81E-01 | BC037034      | 1,11 | No  |
| ENSMUSG00000036949 | 3,14E-01  | 0,032335763  | 1,04E+00 | 3,08E-01 | 6,07E-01 | Slc39a12      | 1,24 | No  |
| ENSMUSG00000036951 | -1,87E+00 | -3,107637761 | 1,39E+00 | 2,38E-01 | 5,50E-01 | C130079G13Rik | 0,27 | No  |
| ENSMUSG00000036955 | 2,04E-02  | 4,616753189  | 6,78E-02 | 7,95E-01 | 9,56E-01 | Kif1bp        | 1,01 | No  |
| ENSMUSG00000036957 | 1,85E-01  | -2,268058866 | 5,11E-02 | 8,21E-01 | 9,72E-01 | Lrfn3         | 1,14 | No  |
| ENSMUSG00000036961 | 9,11E-01  | -1,832029338 | 2,38E+00 | 1,23E-01 | 4,37E-01 | Wnt8b         | 1,88 | No  |
| ENSMUSG00000036962 | -1,94E+00 | -3,107619243 | 1,50E+00 | 2,21E-01 | 5,50E-01 | Cfap221       | 0,26 | No  |
| ENSMUSG00000036964 | 1,16E-01  | 2,5083201    | 8,23E-01 | 3,64E-01 | 6,65E-01 | Trim17        | 1,08 | No  |
| ENSMUSG00000036966 | -3,25E-03 | 5,466486462  | 2,18E-03 | 9,63E-01 | 1,00E+00 | Spryd3        | 1,00 | No  |
| ENSMUSG00000036968 | 4,74E-03  | 4,024211262  | 2,86E-03 | 9,57E-01 | 1,00E+00 | Cnpy4         | 1,00 | No  |
| ENSMUSG00000036975 | 6,56E-02  | 3,311328123  | 4,00E-01 | 5,27E-01 | 8,04E-01 | Tmem177       | 1,05 | No  |
| ENSMUSG00000036977 | -6,02E-02 | 2,669377564  | 2,43E-01 | 6,22E-01 | 8,58E-01 | Anapc10       | 0,96 | No  |
| ENSMUSG00000036980 | 6,31E-02  | 4,852064924  | 6,97E-01 | 4,04E-01 | 7,01E-01 | Taf6          | 1,04 | No  |
| ENSMUSG00000036983 | 2,65E-01  | 2,712629695  | 4,67E+00 | 3,07E-02 | 2,02E-01 | Tfb1m         | 1,20 | No  |
| ENSMUSG00000036986 | -1,55E-02 | 5,190320088  | 4,66E-02 | 8,29E-01 | 9,76E-01 | Pml           | 0,99 | No  |
| ENSMUSG00000036989 | 4,76E-02  | 5,438956716  | 4,69E-01 | 4,93E-01 | 7,79E-01 | Trim3         | 1,03 | No  |
| ENSMUSG00000036990 | 2,80E-02  | 6,688982207  | 2,04E-01 | 6,52E-01 | 8,77E-01 | Otud4         | 1,02 | No  |
| ENSMUSG00000036992 | 8,27E-02  | 4,059566567  | 8,84E-01 | 3,47E-01 | 6,48E-01 | Nxt1          | 1,06 | No  |

|                    |           |              |          |          |          |           |  |      |     |
|--------------------|-----------|--------------|----------|----------|----------|-----------|--|------|-----|
| ENSMUSG00000036995 | 1,19E-01  | 0,557314381  | 2,72E-01 | 6,02E-01 | 8,48E-01 | Asap3     |  | 1,09 | No  |
| ENSMUSG00000037001 | 4,62E-02  | 2,118682436  | 1,02E-01 | 7,49E-01 | 9,31E-01 | Zfp39     |  | 1,03 | No  |
| ENSMUSG00000037003 | 2,16E-02  | 1,525607585  | 1,59E-02 | 9,00E-01 | 1,00E+00 | Tns2      |  | 1,02 | No  |
| ENSMUSG00000037007 | 3,84E-02  | 2,449382017  | 9,24E-02 | 7,61E-01 | 9,37E-01 | Zfp113    |  | 1,03 | No  |
| ENSMUSG00000037012 | 8,29E-02  | 6,727669229  | 1,80E+00 | 1,80E-01 | 5,41E-01 | Hk1       |  | 1,06 | No  |
| ENSMUSG00000037013 | 2,48E-01  | 6,541009846  | 1,56E+01 | 7,69E-05 | 1,95E-03 | Ss18      |  | 1,19 | Yes |
| ENSMUSG00000037014 | 7,44E-01  | -2,896157547 | 3,02E-01 | 5,83E-01 | 8,38E-01 | Sstr4     |  | 1,68 | No  |
| ENSMUSG00000037016 | 5,83E-01  | -2,146110925 | 5,75E-01 | 4,48E-01 | 7,38E-01 | Frem2     |  | 1,50 | No  |
| ENSMUSG00000037017 | 1,11E-01  | 3,741404335  | 1,46E+00 | 2,27E-01 | 5,50E-01 | Zscan21   |  | 1,08 | No  |
| ENSMUSG00000037020 | 2,58E-01  | 5,117557318  | 1,24E+01 | 4,23E-04 | 7,98E-03 | Wdr62     |  | 1,20 | Yes |
| ENSMUSG00000037022 | 1,58E-01  | 2,452901784  | 1,48E+00 | 2,24E-01 | 5,50E-01 | Mmaa      |  | 1,12 | No  |
| ENSMUSG00000037029 | 2,31E-01  | 4,587710358  | 8,48E+00 | 3,59E-03 | 4,38E-02 | Zfp146    |  | 1,17 | Yes |
| ENSMUSG00000037031 | -1,92E+00 | -3,033623267 | 1,46E+00 | 2,27E-01 | 5,50E-01 | Tspan15   |  | 0,26 | No  |
| ENSMUSG00000037032 | -1,17E+00 | -1,378233942 | 5,07E+00 | 2,43E-02 | 1,71E-01 | Apbb1     |  | 0,44 | No  |
| ENSMUSG00000037035 | -2,76E-01 | -2,03362296  | 1,32E-01 | 7,16E-01 | 9,13E-01 | Inhbb     |  | 0,83 | No  |
| ENSMUSG00000037049 | 1,23E-01  | 4,623326546  | 2,41E+00 | 1,20E-01 | 4,32E-01 | Smpd1     |  | 1,09 | No  |
| ENSMUSG00000037058 | -3,82E-02 | 5,891073301  | 3,35E-01 | 5,63E-01 | 8,26E-01 | Paip2     |  | 0,97 | No  |
| ENSMUSG00000037060 | -9,18E-01 | -2,522642731 | 7,39E-01 | 3,90E-01 | 6,90E-01 | Cavin3    |  | 0,53 | No  |
| ENSMUSG00000037062 | 4,19E-04  | 7,562994895  | 5,03E-05 | 9,94E-01 | 1,00E+00 | Sh3glb1   |  | 1,00 | No  |
| ENSMUSG00000037070 | 1,00E-02  | 5,209786971  | 1,95E-02 | 8,89E-01 | 1,00E+00 | Rbmx1     |  | 1,01 | No  |
| ENSMUSG00000037071 | 1,92E-01  | 7,521079833  | 1,05E+01 | 1,17E-03 | 1,84E-02 | Scd1      |  | 1,14 | Yes |
| ENSMUSG00000037072 | 4,17E-02  | 7,62825127   | 4,99E-01 | 4,80E-01 | 7,68E-01 | Selenof   |  | 1,03 | No  |
| ENSMUSG00000037075 | 9,72E-02  | 5,635801712  | 2,01E+00 | 1,56E-01 | 5,00E-01 | Rnf139    |  | 1,07 | No  |
| ENSMUSG00000037085 | 2,93E-01  | 3,077748387  | 7,05E+00 | 7,93E-03 | 7,85E-02 | Trmt12    |  | 1,23 | No  |
| ENSMUSG00000037089 | -5,95E-02 | 5,824048447  | 7,99E-01 | 3,71E-01 | 6,72E-01 | Slc35b2   |  | 0,96 | No  |
| ENSMUSG00000037095 | 7,02E-01  | -0,946366302 | 2,54E+00 | 1,11E-01 | 4,08E-01 | Lrg1      |  | 1,63 | No  |
| ENSMUSG00000037096 | 6,58E-03  | 5,750706567  | 9,59E-03 | 9,22E-01 | 1,00E+00 | Gm9762    |  | 1,00 | No  |
| ENSMUSG00000037098 | -5,40E-02 | 3,656930008  | 3,31E-01 | 5,65E-01 | 8,28E-01 | Rab11fip3 |  | 0,96 | No  |
| ENSMUSG00000037103 | -1,07E-02 | 5,032254787  | 2,10E-02 | 8,85E-01 | 1,00E+00 | Dcaf15    |  | 0,99 | No  |
| ENSMUSG00000037104 | 1,85E-01  | 4,005247591  | 4,51E+00 | 3,37E-02 | 2,16E-01 | Socs5     |  | 1,14 | No  |
| ENSMUSG00000037106 | 7,72E-01  | -1,26803517  | 2,39E+00 | 1,22E-01 | 4,36E-01 | Fer1f6    |  | 1,71 | No  |
| ENSMUSG00000037108 | 6,57E-02  | 4,459601675  | 6,49E-01 | 4,20E-01 | 7,16E-01 | Zcwpw1    |  | 1,05 | No  |

|                    |           |              |           |          |          |               |      |     |
|--------------------|-----------|--------------|-----------|----------|----------|---------------|------|-----|
| ENSMUSG00000037110 | 1,56E-01  | 4,967020015  | 4,32E+00  | 3,77E-02 | 2,31E-01 | Ralgapa2      | 1,11 | No  |
| ENSMUSG00000037111 | 4,13E-02  | 7,405544064  | 4,83E-01  | 4,87E-01 | 7,74E-01 | Setd7         | 1,03 | No  |
| ENSMUSG00000037112 | -2,17E-02 | 4,740129222  | 7,85E-02  | 7,79E-01 | 9,48E-01 | Sik2          | 0,99 | No  |
| ENSMUSG00000037119 | 1,93E-01  | 7,319263299  | 1,04E+01  | 1,25E-03 | 1,93E-02 | Fam91a1       | 1,14 | Yes |
| ENSMUSG00000037126 | -4,30E-01 | 5,289336551  | 3,73E+01  | 1,03E-09 | 8,40E-08 | Psd           | 0,74 | Yes |
| ENSMUSG00000037134 | 2,48E-01  | 4,433873843  | 9,34E+00  | 2,25E-03 | 3,07E-02 | Prmt9         | 1,19 | Yes |
| ENSMUSG00000037138 | 2,20E-01  | 3,657495079  | 5,24E+00  | 2,21E-02 | 1,61E-01 | Aff3          | 1,16 | No  |
| ENSMUSG00000037139 | 2,81E-02  | 0,112069178  | 1,05E-02  | 9,19E-01 | 1,00E+00 | Myom3         | 1,02 | No  |
| ENSMUSG00000037143 | 3,14E-02  | -3,107617333 | -7,69E-10 | 1,00E+00 | 1,00E+00 | Cfap61        | 1,02 | No  |
| ENSMUSG00000037148 | 3,14E-01  | 5,079881775  | 1,82E+01  | 1,98E-05 | 6,15E-04 | Arhgap10      | 1,24 | Yes |
| ENSMUSG00000037149 | -2,90E-02 | 5,510993142  | 1,78E-01  | 6,73E-01 | 8,90E-01 | Ddx1          | 0,98 | No  |
| ENSMUSG00000037151 | 1,84E-01  | 4,49192903   | 5,26E+00  | 2,18E-02 | 1,59E-01 | Lrrc20        | 1,14 | No  |
| ENSMUSG00000037152 | 1,62E-01  | 2,952566732  | 1,93E+00  | 1,64E-01 | 5,16E-01 | Ndufc1        | 1,12 | No  |
| ENSMUSG00000037157 | -1,92E+00 | -3,0336536   | 1,46E+00  | 2,27E-01 | 5,50E-01 | Il22ra1       | 0,26 | No  |
| ENSMUSG00000037159 | 1,89E+00  | -2,96320077  | 1,38E+00  | 2,40E-01 | 5,50E-01 | Wee2          | 3,71 | No  |
| ENSMUSG00000037161 | 7,83E-01  | 0,044904991  | 6,51E+00  | 1,07E-02 | 9,83E-02 | Mgarp         | 1,72 | No  |
| ENSMUSG00000037166 | 7,53E-02  | 0,758372452  | 1,14E-01  | 7,36E-01 | 9,24E-01 | Ppp1r14a      | 1,05 | No  |
| ENSMUSG00000037169 | -3,19E+00 | -2,896088812 | 4,27E+00  | 3,87E-02 | 2,33E-01 | Mycn          | 0,11 | No  |
| ENSMUSG00000037171 | 4,41E-01  | -2,832010046 | 1,52E-01  | 6,97E-01 | 9,03E-01 | Nodal         | 1,36 | No  |
| ENSMUSG00000037172 | -3,41E-02 | 4,952211214  | 2,11E-01  | 6,46E-01 | 8,74E-01 | E330009J07Rik | 0,98 | No  |
| ENSMUSG00000037174 | 1,21E-02  | 6,126180812  | 3,49E-02  | 8,52E-01 | 9,90E-01 | Elf2          | 1,01 | No  |
| ENSMUSG00000037185 | 3,67E-01  | -1,333217669 | 4,36E-01  | 5,09E-01 | 7,92E-01 | Krt80         | 1,29 | No  |
| ENSMUSG00000037188 | 1,45E+00  | -1,998040779 | 3,89E+00  | 4,86E-02 | 2,65E-01 | Grhl3         | 2,74 | No  |
| ENSMUSG00000037190 | 2,24E-01  | 3,720493328  | 5,55E+00  | 1,85E-02 | 1,44E-01 | Cyb561d2      | 1,17 | No  |
| ENSMUSG00000037196 | -6,09E-02 | -2,548220308 | 3,38E-03  | 9,54E-01 | 1,00E+00 | Pacrg         | 0,96 | No  |
| ENSMUSG00000037197 | -2,48E-01 | 5,310441071  | 1,23E+01  | 4,59E-04 | 8,55E-03 | Rbm17         | 0,84 | Yes |
| ENSMUSG00000037202 | -1,86E+00 | -2,963227946 | 1,40E+00  | 2,36E-01 | 5,50E-01 | Prf1          | 0,28 | No  |
| ENSMUSG00000037204 | -7,98E-03 | 4,540202221  | 1,00E-02  | 9,20E-01 | 1,00E+00 | Atg101        | 0,99 | No  |
| ENSMUSG00000037206 | 1,84E+00  | -2,832034594 | 1,33E+00  | 2,49E-01 | 5,50E-01 | Islr          | 3,57 | No  |
| ENSMUSG00000037210 | -5,95E-02 | 5,3767887    | 7,22E-01  | 3,95E-01 | 6,96E-01 | Fam193a       | 0,96 | No  |
| ENSMUSG00000037211 | -2,65E-01 | 3,147134231  | 6,07E+00  | 1,37E-02 | 1,18E-01 | Spry1         | 0,83 | No  |
| ENSMUSG00000037214 | 1,16E-02  | 3,298696766  | 1,21E-02  | 9,12E-01 | 1,00E+00 | Thap1         | 1,01 | No  |

|                    |           |              |          |          |          |               |      |     |
|--------------------|-----------|--------------|----------|----------|----------|---------------|------|-----|
| ENSMUSG00000037216 | -5,28E-02 | 0,755631381  | 5,66E-02 | 8,12E-01 | 9,67E-01 | Lipt1         | 0,96 | No  |
| ENSMUSG00000037221 | 1,48E-01  | 4,96334156   | 3,92E+00 | 4,77E-02 | 2,62E-01 | Mospd3        | 1,11 | No  |
| ENSMUSG00000037224 | -4,54E-01 | -0,847842518 | 1,31E+00 | 2,52E-01 | 5,50E-01 | Zfyve28       | 0,73 | No  |
| ENSMUSG00000037225 | -2,88E-01 | 1,265182916  | 2,39E+00 | 1,22E-01 | 4,37E-01 | Fgf2          | 0,82 | No  |
| ENSMUSG00000037234 | 8,21E-02  | 6,718629878  | 1,77E+00 | 1,83E-01 | 5,46E-01 | Hook3         | 1,06 | No  |
| ENSMUSG00000037235 | 1,67E-02  | 6,62234515   | 7,22E-02 | 7,88E-01 | 9,53E-01 | Mxd4          | 1,01 | No  |
| ENSMUSG00000037236 | 8,94E-02  | 7,03458553   | 2,17E+00 | 1,40E-01 | 4,73E-01 | Matr3         | 1,06 | No  |
| ENSMUSG00000037239 | -3,23E-01 | 3,860115397  | 1,26E+01 | 3,86E-04 | 7,43E-03 | Spred3        | 0,80 | Yes |
| ENSMUSG00000037242 | -1,81E-01 | 8,719235583  | 1,00E+01 | 1,56E-03 | 2,30E-02 | Clic4         | 0,88 | Yes |
| ENSMUSG00000037243 | 7,56E-02  | 3,757173004  | 6,36E-01 | 4,25E-01 | 7,19E-01 | Zfp692        | 1,05 | No  |
| ENSMUSG00000037247 | -5,80E-02 | -3,033647069 | 1,56E-03 | 9,68E-01 | 1,00E+00 | Pldi          | 0,96 | No  |
| ENSMUSG00000037251 | 1,13E-01  | 3,745193481  | 1,47E+00 | 2,25E-01 | 5,50E-01 | Pomk          | 1,08 | No  |
| ENSMUSG00000037253 | 2,34E-02  | 5,857465946  | 1,25E-01 | 7,24E-01 | 9,17E-01 | Mex3c         | 1,02 | No  |
| ENSMUSG00000037254 | -3,86E+00 | -2,770568777 | 7,14E+00 | 7,55E-03 | 7,58E-02 | Itih2         | 0,07 | No  |
| ENSMUSG00000037257 | 4,92E-02  | 5,272997312  | 4,79E-01 | 4,89E-01 | 7,76E-01 | Aagab         | 1,03 | No  |
| ENSMUSG00000037259 | 7,41E-01  | -2,070195534 | 9,81E-01 | 3,22E-01 | 6,22E-01 | Dzank1        | 1,67 | No  |
| ENSMUSG00000037260 | 8,76E-02  | 6,13384398   | 1,83E+00 | 1,76E-01 | 5,34E-01 | Hgsnat        | 1,06 | No  |
| ENSMUSG00000037262 | 4,39E-03  | 3,611813792  | 2,02E-03 | 9,64E-01 | 1,00E+00 | Kin           | 1,00 | No  |
| ENSMUSG00000037263 | 6,85E-01  | -2,896150766 | 2,55E-01 | 6,14E-01 | 8,53E-01 | Aldh3b3       | 1,61 | No  |
| ENSMUSG00000037266 | -2,28E-02 | 7,874086498  | 1,53E-01 | 6,96E-01 | 9,03E-01 | Rsrp1         | 0,98 | No  |
| ENSMUSG00000037270 | 5,17E-02  | 6,624644617  | 6,88E-01 | 4,07E-01 | 7,03E-01 | 4932438A13Rik | 1,04 | No  |
| ENSMUSG00000037275 | 7,35E-02  | 4,550833935  | 8,67E-01 | 3,52E-01 | 6,53E-01 | Gemin5        | 1,05 | No  |
| ENSMUSG00000037278 | 2,19E-01  | 4,708980915  | 7,82E+00 | 5,16E-03 | 5,72E-02 | Tmem97        | 1,16 | No  |
| ENSMUSG00000037279 | 1,66E-01  | 0,536557138  | 4,27E-01 | 5,13E-01 | 7,95E-01 | Ovol2         | 1,12 | No  |
| ENSMUSG00000037280 | 2,43E-01  | 6,883716247  | 1,56E+01 | 7,85E-05 | 1,98E-03 | Galnt6        | 1,18 | Yes |
| ENSMUSG00000037286 | 6,33E-04  | 5,612665706  | 8,60E-05 | 9,93E-01 | 1,00E+00 | Stag1         | 1,00 | No  |
| ENSMUSG00000037287 | 1,95E-01  | 5,141336872  | 7,14E+00 | 7,55E-03 | 7,58E-02 | Tbccl         | 1,14 | No  |
| ENSMUSG00000037295 | 1,44E-01  | 5,274026095  | 4,07E+00 | 4,36E-02 | 2,49E-01 | Ldlrap1       | 1,11 | No  |
| ENSMUSG00000037296 | 2,58E-02  | 4,073573368  | 8,81E-02 | 7,67E-01 | 9,40E-01 | Lsm1          | 1,02 | No  |
| ENSMUSG00000037300 | 6,29E-02  | 5,527690078  | 8,34E-01 | 3,61E-01 | 6,62E-01 | Ttc13         | 1,04 | No  |
| ENSMUSG00000037306 | 2,16E-01  | 6,753017818  | 1,22E+01 | 4,84E-04 | 8,93E-03 | Man1c1        | 1,16 | Yes |
| ENSMUSG00000037313 | 9,72E-02  | 6,012996287  | 2,20E+00 | 1,38E-01 | 4,68E-01 | Tacc3         | 1,07 | No  |

|                    |           |              |          |          |          |          |      |     |
|--------------------|-----------|--------------|----------|----------|----------|----------|------|-----|
| ENSMUSG00000037316 | 4,43E-02  | 4,29738067   | 2,86E-01 | 5,93E-01 | 8,42E-01 | Bag4     | 1,03 | No  |
| ENSMUSG00000037318 | -1,72E-01 | 4,711948325  | 4,96E+00 | 2,59E-02 | 1,79E-01 | Traf3ip3 | 0,89 | No  |
| ENSMUSG00000037321 | -1,71E-01 | 7,44475889   | 8,29E+00 | 3,98E-03 | 4,72E-02 | Tap1     | 0,89 | Yes |
| ENSMUSG00000037325 | 2,56E-01  | 1,68604167   | 2,38E+00 | 1,23E-01 | 4,38E-01 | Bbs7     | 1,19 | No  |
| ENSMUSG00000037326 | 1,24E-01  | 5,820313289  | 3,48E+00 | 6,19E-02 | 3,10E-01 | Capn15   | 1,09 | No  |
| ENSMUSG00000037331 | 5,84E-02  | 7,66208388   | 9,84E-01 | 3,21E-01 | 6,22E-01 | Larp1    | 1,04 | No  |
| ENSMUSG00000037336 | -3,86E-01 | 0,678055108  | 2,96E+00 | 8,56E-02 | 3,76E-01 | Mfsd2b   | 0,77 | No  |
| ENSMUSG00000037337 | 2,38E-02  | 5,864125148  | 1,28E-01 | 7,20E-01 | 9,16E-01 | Map4k1   | 1,02 | No  |
| ENSMUSG00000037339 | 1,89E-02  | 4,737511241  | 6,03E-02 | 8,06E-01 | 9,64E-01 | Fam53a   | 1,01 | No  |
| ENSMUSG00000037343 | 9,49E-02  | 5,473915835  | 1,87E+00 | 1,71E-01 | 5,28E-01 | Taf2     | 1,07 | No  |
| ENSMUSG00000037344 | 2,08E-01  | 4,954966631  | 7,89E+00 | 4,96E-03 | 5,57E-02 | Slc12a9  | 1,16 | No  |
| ENSMUSG00000037346 | -2,36E-01 | -1,77058281  | 1,23E-01 | 7,26E-01 | 9,18E-01 | Hrh4     | 0,85 | No  |
| ENSMUSG00000037348 | 1,83E-01  | 5,25725984   | 6,56E+00 | 1,04E-02 | 9,65E-02 | Paqr7    | 1,14 | No  |
| ENSMUSG00000037349 | -8,37E-03 | 2,692778761  | 4,55E-03 | 9,46E-01 | 1,00E+00 | Nudt22   | 0,99 | No  |
| ENSMUSG00000037351 | 7,77E-02  | 6,625431218  | 1,56E+00 | 2,12E-01 | 5,50E-01 | Actr1b   | 1,06 | No  |
| ENSMUSG00000037353 | 3,60E-02  | 4,623003855  | 2,10E-01 | 6,46E-01 | 8,74E-01 | Letmd1   | 1,03 | No  |
| ENSMUSG00000037355 | -4,41E-02 | 4,614852328  | 3,15E-01 | 5,75E-01 | 8,34E-01 | Uvssa    | 0,97 | No  |
| ENSMUSG00000037361 | -4,81E-02 | 5,393964112  | 4,69E-01 | 4,93E-01 | 7,79E-01 | Sf3b6    | 0,97 | No  |
| ENSMUSG00000037362 | 9,02E-02  | 7,273305719  | 2,24E+00 | 1,34E-01 | 4,61E-01 | Nov      | 1,06 | No  |
| ENSMUSG00000037363 | -2,71E-01 | 1,760096055  | 2,97E+00 | 8,48E-02 | 3,74E-01 | Letm2    | 0,83 | No  |
| ENSMUSG00000037364 | 6,22E-02  | 6,929087749  | 1,04E+00 | 3,08E-01 | 6,06E-01 | Srrt     | 1,04 | No  |
| ENSMUSG00000037366 | 1,35E-01  | 4,272736165  | 2,57E+00 | 1,09E-01 | 4,05E-01 | Pafah2   | 1,10 | No  |
| ENSMUSG00000037370 | 4,98E-01  | 2,363520691  | 1,29E+01 | 3,27E-04 | 6,50E-03 | Enpp1    | 1,41 | Yes |
| ENSMUSG00000037373 | 2,66E-02  | 7,378696786  | 2,00E-01 | 6,55E-01 | 8,79E-01 | Ctbp1    | 1,02 | No  |
| ENSMUSG00000037375 | 3,11E-02  | 0,8194467    | 1,85E-02 | 8,92E-01 | 1,00E+00 | Hhat     | 1,02 | No  |
| ENSMUSG00000037376 | 7,38E-03  | 5,298463053  | 1,08E-02 | 9,17E-01 | 1,00E+00 | Trmt6    | 1,01 | No  |
| ENSMUSG00000037379 | 9,50E-02  | -1,655055855 | 1,99E-02 | 8,88E-01 | 1,00E+00 | Spon2    | 1,07 | No  |
| ENSMUSG00000037386 | -6,34E-01 | -2,268106367 | 5,47E-01 | 4,59E-01 | 7,48E-01 | Rims2    | 0,64 | No  |
| ENSMUSG00000037390 | -1,87E+00 | -3,107637761 | 1,39E+00 | 2,38E-01 | 5,50E-01 | Muc3     | 0,27 | No  |
| ENSMUSG00000037395 | 1,84E-01  | 4,586291397  | 5,55E+00 | 1,85E-02 | 1,44E-01 | Rcor3    | 1,14 | No  |
| ENSMUSG00000037400 | -1,59E-01 | 7,023836429  | 6,94E+00 | 8,42E-03 | 8,23E-02 | Atp11b   | 0,90 | No  |
| ENSMUSG00000037405 | -1,45E-01 | 7,970114969  | 6,23E+00 | 1,26E-02 | 1,10E-01 | Icam1    | 0,90 | No  |

|                    |           |              |           |          |          |               |      |     |
|--------------------|-----------|--------------|-----------|----------|----------|---------------|------|-----|
| ENSMUSG00000037406 | -3,50E-01 | 1,233338559  | 3,44E+00  | 6,35E-02 | 3,14E-01 | Htra4         | 0,78 | No  |
| ENSMUSG00000037408 | 2,17E-01  | 4,951260491  | 8,42E+00  | 3,71E-03 | 4,47E-02 | Cnm4          | 1,16 | Yes |
| ENSMUSG00000037410 | 4,45E-02  | 7,321629604  | 5,54E-01  | 4,57E-01 | 7,46E-01 | Tbc1d2b       | 1,03 | No  |
| ENSMUSG00000037411 | -9,37E-01 | -0,56075955  | 6,85E+00  | 8,88E-03 | 8,55E-02 | Serpine1      | 0,52 | No  |
| ENSMUSG00000037415 | 3,49E-02  | 6,423315174  | 3,07E-01  | 5,80E-01 | 8,36E-01 | Ranbp10       | 1,02 | No  |
| ENSMUSG00000037416 | 4,08E-02  | 6,219781747  | 4,02E-01  | 5,26E-01 | 8,03E-01 | Dmxl1         | 1,03 | No  |
| ENSMUSG00000037418 | -2,19E-01 | 2,681539733  | 3,00E+00  | 8,32E-02 | 3,71E-01 | Best1         | 0,86 | No  |
| ENSMUSG00000037419 | -4,69E-02 | 5,601024328  | 4,76E-01  | 4,90E-01 | 7,77E-01 | Endod1        | 0,97 | No  |
| ENSMUSG00000037424 | -1,86E+00 | -3,033612668 | 1,39E+00  | 2,38E-01 | 5,50E-01 | Taar9         | 0,28 | No  |
| ENSMUSG00000037426 | -1,55E-01 | 5,034458082  | 4,43E+00  | 3,53E-02 | 2,22E-01 | Depdc5        | 0,90 | No  |
| ENSMUSG00000037428 | -1,90E+00 | -3,033594154 | 1,44E+00  | 2,30E-01 | 5,50E-01 | Vgf           | 0,27 | No  |
| ENSMUSG00000037432 | 2,37E-01  | 2,860265656  | 3,99E+00  | 4,58E-02 | 2,55E-01 | Fer115        | 1,18 | No  |
| ENSMUSG00000037434 | 1,98E-01  | 5,091529139  | 7,30E+00  | 6,89E-03 | 7,09E-02 | Slc30a1       | 1,15 | No  |
| ENSMUSG00000037437 | 7,16E-01  | -2,711741188 | 2,80E-01  | 5,97E-01 | 8,45E-01 | Adam32        | 1,64 | No  |
| ENSMUSG00000037438 | -7,94E-02 | 2,033179227  | 2,77E-01  | 5,99E-01 | 8,46E-01 | Uqcrh-ps1     | 0,95 | No  |
| ENSMUSG00000037440 | 9,01E-03  | -3,107646452 | -5,16E-10 | 1,00E+00 | 1,00E+00 | Vnn1          | 1,01 | No  |
| ENSMUSG00000037443 | -4,82E-02 | 6,426981367  | 5,88E-01  | 4,43E-01 | 7,35E-01 | Cep85         | 0,97 | No  |
| ENSMUSG00000037446 | -1,87E+00 | -3,107637761 | 1,39E+00  | 2,38E-01 | 5,50E-01 | Tulp1         | 0,27 | No  |
| ENSMUSG00000037447 | -2,61E-01 | 5,089288113  | 1,28E+01  | 3,52E-04 | 6,89E-03 | Arid5a        | 0,83 | Yes |
| ENSMUSG00000037451 | 5,77E-01  | -2,185684276 | 5,64E-01  | 4,53E-01 | 7,42E-01 | Slc22a20      | 1,49 | No  |
| ENSMUSG00000037455 | 9,31E-02  | 0,112129768  | 1,06E-01  | 7,45E-01 | 9,29E-01 | Slc18b1       | 1,07 | No  |
| ENSMUSG00000037458 | 1,64E-01  | 7,063859942  | 7,36E+00  | 6,68E-03 | 6,94E-02 | Azin1         | 1,12 | No  |
| ENSMUSG00000037461 | 8,36E-02  | 5,548524622  | 1,48E+00  | 2,25E-01 | 5,50E-01 | Ints7         | 1,06 | No  |
| ENSMUSG00000037463 | 1,65E-01  | -2,401372028 | 4,05E-02  | 8,41E-01 | 9,84E-01 | Fbxo27        | 1,12 | No  |
| ENSMUSG00000037465 | -1,16E-02 | 5,696497382  | 2,90E-02  | 8,65E-01 | 9,98E-01 | Klf10         | 0,99 | No  |
| ENSMUSG00000037466 | 3,59E-01  | 4,087175637  | 1,67E+01  | 4,42E-05 | 1,22E-03 | 4930427A07Rik | 1,28 | Yes |
| ENSMUSG00000037470 | 1,40E-01  | 7,434412245  | 5,55E+00  | 1,84E-02 | 1,43E-01 | Uggt1         | 1,10 | No  |
| ENSMUSG00000037474 | 2,90E-02  | 4,58925555   | 1,32E-01  | 7,16E-01 | 9,13E-01 | Dtl           | 1,02 | No  |
| ENSMUSG00000037477 | -8,21E-01 | -2,963266074 | 3,67E-01  | 5,45E-01 | 8,13E-01 | Tbx10         | 0,57 | No  |
| ENSMUSG00000037482 | -1,81E+00 | -1,963152656 | 5,21E+00  | 2,25E-02 | 1,63E-01 | Erv3          | 0,28 | No  |
| ENSMUSG00000037486 | 6,27E-02  | 6,435915594  | 9,88E-01  | 3,20E-01 | 6,21E-01 | Asxl2         | 1,04 | No  |
| ENSMUSG00000037487 | -9,02E-02 | 7,256560194  | 2,27E+00  | 1,32E-01 | 4,57E-01 | Ubr5          | 0,94 | No  |

|                    |           |              |           |          |          |          |      |     |
|--------------------|-----------|--------------|-----------|----------|----------|----------|------|-----|
| ENSMUSG00000037490 | -4,05E-01 | -0,093309128 | 1,57E+00  | 2,10E-01 | 5,50E-01 | Slc2a12  | 0,76 | No  |
| ENSMUSG00000037493 | 2,88E-02  | 2,514358474  | 4,84E-02  | 8,26E-01 | 9,74E-01 | Cib2     | 1,02 | No  |
| ENSMUSG00000037499 | 1,95E-02  | 4,061033028  | 4,99E-02  | 8,23E-01 | 9,73E-01 | Nenf     | 1,01 | No  |
| ENSMUSG00000037503 | -3,43E-02 | 8,044794545  | 3,49E-01  | 5,55E-01 | 8,20E-01 | Fam168b  | 0,98 | No  |
| ENSMUSG00000037509 | 1,56E-01  | 3,026776018  | 1,96E+00  | 1,62E-01 | 5,11E-01 | Arhgef4  | 1,11 | No  |
| ENSMUSG00000037514 | 1,19E-02  | 5,611525884  | 3,05E-02  | 8,61E-01 | 9,96E-01 | Pank2    | 1,01 | No  |
| ENSMUSG00000037519 | 7,08E-02  | 6,277174097  | 1,23E+00  | 2,68E-01 | 5,64E-01 | Ppfia1   | 1,05 | No  |
| ENSMUSG00000037523 | 1,77E-01  | 5,763847732  | 7,00E+00  | 8,14E-03 | 8,00E-02 | Mavs     | 1,13 | No  |
| ENSMUSG00000037525 | 1,40E-01  | 1,535950072  | 6,37E-01  | 4,25E-01 | 7,19E-01 | Bcdin3d  | 1,10 | No  |
| ENSMUSG00000037526 | -2,74E-02 | 4,061620845  | 9,96E-02  | 7,52E-01 | 9,32E-01 | Atg14    | 0,98 | No  |
| ENSMUSG00000037529 | -3,83E-02 | -3,107651936 | -7,91E-11 | 1,00E+00 | 1,00E+00 | Prss40   | 0,97 | No  |
| ENSMUSG00000037531 | 1,13E-01  | 4,150078263  | 1,72E+00  | 1,89E-01 | 5,50E-01 | Mrpl47   | 1,08 | No  |
| ENSMUSG00000037533 | -1,56E-01 | 6,46835543   | 6,21E+00  | 1,27E-02 | 1,11E-01 | Rapgef6  | 0,90 | No  |
| ENSMUSG00000037536 | 1,30E-01  | 5,057854603  | 3,10E+00  | 7,81E-02 | 3,57E-01 | Fbxo34   | 1,09 | No  |
| ENSMUSG00000037541 | -1,15E+00 | -2,185653567 | 2,14E+00  | 1,44E-01 | 4,79E-01 | Shank2   | 0,45 | No  |
| ENSMUSG00000037542 | 2,61E+00  | -2,831999501 | 2,64E+00  | 1,04E-01 | 3,97E-01 | Aldh8a1  | 6,11 | No  |
| ENSMUSG00000037544 | 6,87E-02  | 4,593298215  | 7,52E-01  | 3,86E-01 | 6,87E-01 | Dlgap5   | 1,05 | No  |
| ENSMUSG00000037548 | -6,43E-02 | 8,057834686  | 1,22E+00  | 2,69E-01 | 5,65E-01 | H2-DMb2  | 0,96 | No  |
| ENSMUSG00000037552 | -4,60E-01 | 5,103653644  | 4,07E+01  | 1,73E-10 | 1,58E-08 | Plekhg2  | 0,73 | Yes |
| ENSMUSG00000037553 | 1,13E-01  | 5,583679912  | 2,72E+00  | 9,91E-02 | 3,92E-01 | Zdhhc18  | 1,08 | No  |
| ENSMUSG00000037563 | -1,56E-01 | 4,871642849  | 4,31E+00  | 3,78E-02 | 2,31E-01 | Rps16    | 0,90 | No  |
| ENSMUSG00000037568 | 3,73E-01  | 0,598389715  | 2,24E+00  | 1,34E-01 | 4,61E-01 | Vash2    | 1,29 | No  |
| ENSMUSG00000037570 | -2,26E-01 | 3,721225741  | 5,67E+00  | 1,73E-02 | 1,37E-01 | Mcrs1    | 0,85 | No  |
| ENSMUSG00000037572 | 1,92E-01  | 5,401236226  | 7,49E+00  | 6,21E-03 | 6,58E-02 | Wdhd1    | 1,14 | No  |
| ENSMUSG00000037573 | 2,54E-01  | 5,16958882   | 1,23E+01  | 4,56E-04 | 8,51E-03 | Tob1     | 1,19 | Yes |
| ENSMUSG00000037577 | -9,49E-01 | -2,655184733 | 7,88E-01  | 3,75E-01 | 6,76E-01 | Ephx3    | 0,52 | No  |
| ENSMUSG00000037578 | 2,97E-01  | -2,548235639 | 9,01E-02  | 7,64E-01 | 9,39E-01 | Pkd2l1   | 1,23 | No  |
| ENSMUSG00000037579 | 2,74E-01  | 2,636240553  | 5,03E+00  | 2,50E-02 | 1,75E-01 | Kcnh3    | 1,21 | No  |
| ENSMUSG00000037580 | 2,66E-02  | 5,021367888  | 1,29E-01  | 7,20E-01 | 9,15E-01 | Gch1     | 1,02 | No  |
| ENSMUSG00000037583 | 7,54E-01  | -2,770589857 | 3,08E-01  | 5,79E-01 | 8,36E-01 | Nr0b2    | 1,69 | No  |
| ENSMUSG00000037593 | 2,41E-01  | -0,18540477  | 5,69E-01  | 4,51E-01 | 7,41E-01 | BC030499 | 1,18 | No  |
| ENSMUSG00000037594 | 3,30E-01  | 1,972867412  | 4,83E+00  | 2,80E-02 | 1,89E-01 | BC022687 | 1,26 | No  |



|                    |           |              |          |          |          |          |      |     |
|--------------------|-----------|--------------|----------|----------|----------|----------|------|-----|
| ENSMUSG00000037600 | 1,61E+00  | -2,226211761 | 1,78E+00 | 1,82E-01 | 5,43E-01 | Kdf1     | 3,06 | No  |
| ENSMUSG00000037601 | -2,35E-02 | 5,70055899   | 1,20E-01 | 7,29E-01 | 9,20E-01 | Nme1     | 0,98 | No  |
| ENSMUSG00000037603 | -1,02E+00 | -2,311116348 | 1,61E+00 | 2,04E-01 | 5,50E-01 | Gm5519   | 0,49 | No  |
| ENSMUSG00000037605 | 8,54E-01  | -1,205955452 | 2,54E+00 | 1,11E-01 | 4,08E-01 | Adgrl3   | 1,81 | No  |
| ENSMUSG00000037606 | 1,68E-01  | 2,395835258  | 1,60E+00 | 2,06E-01 | 5,50E-01 | Osbp15   | 1,12 | No  |
| ENSMUSG00000037608 | 1,02E-02  | 7,25092983   | 2,91E-02 | 8,65E-01 | 9,98E-01 | Bclaf1   | 1,01 | No  |
| ENSMUSG00000037613 | 2,42E-01  | 4,768167262  | 9,87E+00 | 1,68E-03 | 2,43E-02 | Tnfrsf23 | 1,18 | Yes |
| ENSMUSG00000037617 | 2,79E-01  | 1,143717051  | 1,99E+00 | 1,58E-01 | 5,04E-01 | Spag1    | 1,21 | No  |
| ENSMUSG00000037621 | -3,18E+00 | -2,770538059 | 4,26E+00 | 3,91E-02 | 2,35E-01 | Atoh8    | 0,11 | No  |
| ENSMUSG00000037622 | 4,07E-03  | 5,722528791  | 3,65E-03 | 9,52E-01 | 1,00E+00 | Wdtdc1   | 1,00 | No  |
| ENSMUSG00000037625 | -5,88E-02 | -3,033652696 | 1,62E-03 | 9,68E-01 | 1,00E+00 | Cldn11   | 0,96 | No  |
| ENSMUSG00000037628 | -7,67E-02 | 2,442047222  | 3,44E-01 | 5,58E-01 | 8,22E-01 | Cdkn3    | 0,95 | No  |
| ENSMUSG00000037638 | 7,84E-02  | 4,954036911  | 1,13E+00 | 2,88E-01 | 5,83E-01 | Zbtb42   | 1,06 | No  |
| ENSMUSG00000037640 | 1,78E-01  | 2,325824373  | 1,92E+00 | 1,65E-01 | 5,18E-01 | Zfp60    | 1,13 | No  |
| ENSMUSG00000037643 | 3,58E-02  | 5,093019801  | 2,41E-01 | 6,23E-01 | 8,58E-01 | Prkci    | 1,03 | No  |
| ENSMUSG00000037646 | 5,81E-02  | 7,437244675  | 9,54E-01 | 3,29E-01 | 6,29E-01 | Vps13b   | 1,04 | No  |
| ENSMUSG00000037649 | 1,55E-01  | 9,086274408  | 7,42E+00 | 6,45E-03 | 6,76E-02 | H2-DMa   | 1,11 | No  |
| ENSMUSG00000037652 | -4,62E-04 | 6,312332222  | 5,28E-05 | 9,94E-01 | 1,00E+00 | Phc3     | 1,00 | No  |
| ENSMUSG00000037656 | 1,79E-01  | 3,874464214  | 3,78E+00 | 5,20E-02 | 2,78E-01 | Slc20a2  | 1,13 | No  |
| ENSMUSG00000037660 | 2,60E+00  | -2,963275374 | 2,63E+00 | 1,05E-01 | 3,97E-01 | Gdf7     | 6,08 | No  |
| ENSMUSG00000037661 | 2,26E-01  | 5,737540229  | 1,13E+01 | 7,84E-04 | 1,32E-02 | Gpr160   | 1,17 | Yes |
| ENSMUSG00000037664 | -1,17E-01 | -0,509963571 | 1,05E-01 | 7,46E-01 | 9,29E-01 | Cdkn1c   | 0,92 | No  |
| ENSMUSG00000037669 | 1,08E-01  | 5,527639161  | 2,45E+00 | 1,17E-01 | 4,24E-01 | Ldah     | 1,08 | No  |
| ENSMUSG00000037674 | 5,42E-02  | 6,792535669  | 7,78E-01 | 3,78E-01 | 6,78E-01 | Rfx7     | 1,04 | No  |
| ENSMUSG00000037679 | -1,48E-01 | 7,009180392  | 6,01E+00 | 1,42E-02 | 1,21E-01 | Inf2     | 0,90 | No  |
| ENSMUSG00000037681 | 4,39E-01  | 4,056537538  | 2,42E+01 | 8,78E-07 | 3,98E-05 | Esyt3    | 1,36 | Yes |
| ENSMUSG00000037683 | -6,18E-01 | -1,088753419 | 1,93E+00 | 1,64E-01 | 5,16E-01 | Armc3    | 0,65 | No  |
| ENSMUSG00000037685 | 1,53E-01  | 5,716499594  | 5,13E+00 | 2,36E-02 | 1,68E-01 | Atp8a1   | 1,11 | No  |
| ENSMUSG00000037686 | -1,75E+00 | -2,770610262 | 2,13E+00 | 1,44E-01 | 4,80E-01 | Aspg     | 0,30 | No  |
| ENSMUSG00000037692 | 2,03E-01  | 3,090378098  | 3,41E+00 | 6,49E-02 | 3,19E-01 | Ahdcd1   | 1,15 | No  |
| ENSMUSG00000037697 | -1,19E-01 | 7,973558109  | 4,16E+00 | 4,15E-02 | 2,42E-01 | Ddhd1    | 0,92 | No  |
| ENSMUSG00000037703 | 2,13E-01  | 1,641568119  | 1,56E+00 | 2,12E-01 | 5,50E-01 | Lzts3    | 1,16 | No  |

|                    |           |              |           |          |          |          |      |     |
|--------------------|-----------|--------------|-----------|----------|----------|----------|------|-----|
| ENSMUSG00000037705 | -3,18E+00 | -2,83195675  | 4,25E+00  | 3,92E-02 | 2,35E-01 | Tecta    | 0,11 | No  |
| ENSMUSG00000037706 | 5,81E-02  | 6,587997605  | 8,63E-01  | 3,53E-01 | 6,54E-01 | Cd81     | 1,04 | No  |
| ENSMUSG00000037708 | 1,91E-01  | -2,770641786 | 3,13E-02  | 8,60E-01 | 9,95E-01 | Spag6    | 1,14 | No  |
| ENSMUSG00000037709 | -2,72E-02 | -1,015742533 | 4,06E-03  | 9,49E-01 | 1,00E+00 | Fam13a   | 0,98 | No  |
| ENSMUSG00000037710 | 3,08E-02  | 4,553738775  | 1,47E-01  | 7,02E-01 | 9,05E-01 | Cisd1    | 1,02 | No  |
| ENSMUSG00000037712 | 2,34E-01  | -2,311092896 | 6,89E-02  | 7,93E-01 | 9,56E-01 | Fermt2   | 1,18 | No  |
| ENSMUSG00000037716 | -6,34E-01 | -1,755401851 | 1,13E+00  | 2,88E-01 | 5,84E-01 | Ccdc33   | 0,64 | No  |
| ENSMUSG00000037720 | 1,29E-02  | 6,054333615  | 3,93E-02  | 8,43E-01 | 9,85E-01 | Tmem33   | 1,01 | No  |
| ENSMUSG00000037722 | -2,17E-01 | 3,741442983  | 5,39E+00  | 2,02E-02 | 1,52E-01 | Gnpnat1  | 0,86 | No  |
| ENSMUSG00000037725 | 2,44E-01  | 3,991188919  | 7,53E+00  | 6,07E-03 | 6,48E-02 | Ckap2    | 1,18 | No  |
| ENSMUSG00000037730 | 1,42E-02  | 4,176961203  | 2,80E-02  | 8,67E-01 | 9,99E-01 | Mynn     | 1,01 | No  |
| ENSMUSG00000037731 | 1,45E-01  | 7,291935231  | 5,94E+00  | 1,48E-02 | 1,25E-01 | Themis2  | 1,11 | No  |
| ENSMUSG00000037736 | -5,23E-02 | -2,963273906 | 1,24E-03  | 9,72E-01 | 1,00E+00 | Limch1   | 0,96 | No  |
| ENSMUSG00000037737 | 4,24E-02  | -3,033592245 | -1,17E-09 | 1,00E+00 | 1,00E+00 | Actrt3   | 1,03 | No  |
| ENSMUSG00000037738 | 1,26E+00  | -2,711710917 | 9,88E-01  | 3,20E-01 | 6,21E-01 | Nek5     | 2,40 | No  |
| ENSMUSG00000037740 | 8,52E-02  | 4,881222768  | 1,26E+00  | 2,61E-01 | 5,55E-01 | Mrps26   | 1,06 | No  |
| ENSMUSG00000037742 | -1,90E-01 | 11,21507975  | 1,16E+01  | 6,50E-04 | 1,14E-02 | Eef1a1   | 0,88 | Yes |
| ENSMUSG00000037750 | 1,65E-01  | 4,04924943   | 3,54E+00  | 6,00E-02 | 3,03E-01 | Fam222b  | 1,12 | No  |
| ENSMUSG00000037752 | -3,81E-02 | 2,630292219  | 9,50E-02  | 7,58E-01 | 9,36E-01 | Xkr8     | 0,97 | No  |
| ENSMUSG00000037754 | -3,28E-01 | 3,025454581  | 8,62E+00  | 3,33E-03 | 4,14E-02 | Ppp1r16b | 0,80 | Yes |
| ENSMUSG00000037759 | 1,07E-01  | 2,833479762  | 8,00E-01  | 3,71E-01 | 6,72E-01 | Ptger2   | 1,08 | No  |
| ENSMUSG00000037761 | 2,27E-01  | 3,869123196  | 6,25E+00  | 1,24E-02 | 1,10E-01 | Actr5    | 1,17 | No  |
| ENSMUSG00000037762 | -5,15E-01 | -1,107574049 | 1,26E+00  | 2,62E-01 | 5,55E-01 | Slc16a9  | 0,70 | No  |
| ENSMUSG00000037771 | -1,04E+00 | -1,145899309 | 5,21E+00  | 2,25E-02 | 1,63E-01 | Slc32a1  | 0,49 | No  |
| ENSMUSG00000037772 | -2,20E-01 | 2,210821839  | 2,28E+00  | 1,31E-01 | 4,55E-01 | Mrpl23   | 0,86 | No  |
| ENSMUSG00000037773 | -8,35E-02 | 4,439976843  | 1,07E+00  | 3,02E-01 | 5,98E-01 | Pced1a   | 0,94 | No  |
| ENSMUSG00000037784 | -1,32E+00 | -2,831992953 | 1,08E+00  | 2,99E-01 | 5,95E-01 | Dzip1l   | 0,40 | No  |
| ENSMUSG00000037787 | -5,22E-02 | 4,233851396  | 3,79E-01  | 5,38E-01 | 8,09E-01 | Apopt1   | 0,96 | No  |
| ENSMUSG00000037788 | -5,59E-01 | 7,550190791  | 8,94E+01  | 3,26E-21 | 8,27E-19 | Vopp1    | 0,68 | Yes |
| ENSMUSG00000037791 | 8,76E-03  | 6,167120741  | 1,86E-02  | 8,92E-01 | 1,00E+00 | Phf12    | 1,01 | No  |
| ENSMUSG00000037795 | 4,97E-02  | 5,425156343  | 5,08E-01  | 4,76E-01 | 7,64E-01 | N4bp2    | 1,04 | No  |
| ENSMUSG00000037797 | 1,87E+00  | -3,107639691 | 1,38E+00  | 2,40E-01 | 5,50E-01 | Adh4     | 3,67 | No  |

|                    |           |              |           |          |          |               |      |     |
|--------------------|-----------|--------------|-----------|----------|----------|---------------|------|-----|
| ENSMUSG00000037801 | 2,27E+00  | -2,47295873  | 4,26E+00  | 3,91E-02 | 2,35E-01 | lqch          | 4,82 | No  |
| ENSMUSG00000037805 | -2,99E-02 | 6,326831936  | 2,22E-01  | 6,38E-01 | 8,68E-01 | Rpl10a        | 0,98 | No  |
| ENSMUSG00000037808 | -1,42E-02 | 5,691969624  | 4,40E-02  | 8,34E-01 | 9,79E-01 | Fam76b        | 0,99 | No  |
| ENSMUSG00000037813 | -2,65E+00 | -2,963248364 | 2,80E+00  | 9,42E-02 | 3,84E-01 | D630003M21Rik | 0,16 | No  |
| ENSMUSG00000037815 | -5,80E-02 | 8,620279511  | 1,02E+00  | 3,11E-01 | 6,11E-01 | Ctnna1        | 0,96 | No  |
| ENSMUSG00000037816 | -6,05E-02 | 5,263620646  | 7,29E-01  | 3,93E-01 | 6,93E-01 | Fbxw17        | 0,96 | No  |
| ENSMUSG00000037818 | -2,11E-01 | 3,505626821  | 4,65E+00  | 3,11E-02 | 2,04E-01 | Abhd18        | 0,86 | No  |
| ENSMUSG00000037820 | -2,07E-02 | 6,67097526   | 1,10E-01  | 7,40E-01 | 9,26E-01 | Tgm2          | 0,99 | No  |
| ENSMUSG00000037822 | -9,73E-02 | 5,69119774   | 2,08E+00  | 1,49E-01 | 4,90E-01 | Smim14        | 0,93 | No  |
| ENSMUSG00000037824 | 2,26E-01  | 6,448861838  | 1,28E+01  | 3,46E-04 | 6,80E-03 | Tspan14       | 1,17 | Yes |
| ENSMUSG00000037826 | 7,64E-03  | 3,96969289   | 7,65E-03  | 9,30E-01 | 1,00E+00 | Ppm1k         | 1,01 | No  |
| ENSMUSG00000037827 | 1,36E-01  | 5,56296671   | 3,89E+00  | 4,84E-02 | 2,65E-01 | Gm5884        | 1,10 | No  |
| ENSMUSG00000037833 | -5,00E-02 | -0,226246123 | 2,57E-02  | 8,73E-01 | 1,00E+00 | Sh2d4b        | 0,97 | No  |
| ENSMUSG00000037843 | -3,83E-02 | -3,107651936 | -7,91E-11 | 1,00E+00 | 1,00E+00 | Vstm2l        | 0,97 | No  |
| ENSMUSG00000037845 | -1,24E-01 | 2,954212373  | 1,19E+00  | 2,74E-01 | 5,71E-01 | Fdxacb1       | 0,92 | No  |
| ENSMUSG00000037846 | 9,28E-01  | -1,175898028 | 3,92E+00  | 4,77E-02 | 2,62E-01 | Rtkn2         | 1,90 | No  |
| ENSMUSG00000037847 | -3,30E-01 | 2,741760116  | 7,33E+00  | 6,79E-03 | 7,03E-02 | Nmrk1         | 0,80 | No  |
| ENSMUSG00000037849 | 2,04E-01  | 1,664115655  | 1,51E+00  | 2,19E-01 | 5,50E-01 | lfi206        | 1,15 | No  |
| ENSMUSG00000037851 | 2,50E-01  | 5,938739717  | 1,44E+01  | 1,50E-04 | 3,40E-03 | lars          | 1,19 | Yes |
| ENSMUSG00000037852 | 3,04E-01  | -2,600700455 | 9,41E-02  | 7,59E-01 | 9,36E-01 | Cpe           | 1,23 | No  |
| ENSMUSG00000037855 | -3,24E-01 | 1,164763072  | 2,77E+00  | 9,59E-02 | 3,87E-01 | Zfp365        | 0,80 | No  |
| ENSMUSG00000037857 | 3,66E-02  | 6,242493692  | 3,29E-01  | 5,66E-01 | 8,28E-01 | Nufip2        | 1,03 | No  |
| ENSMUSG00000037860 | -1,12E-01 | 6,089535408  | 2,98E+00  | 8,44E-02 | 3,73E-01 | Aim2          | 0,93 | No  |
| ENSMUSG00000037868 | 1,27E-01  | 8,536532017  | 4,87E+00  | 2,74E-02 | 1,87E-01 | Egr2          | 1,09 | No  |
| ENSMUSG00000037872 | -1,32E+00 | -2,268063703 | 2,70E+00  | 1,00E-01 | 3,92E-01 | Ackr1         | 0,40 | No  |
| ENSMUSG00000037876 | -2,13E-01 | 7,308047056  | 1,26E+01  | 3,89E-04 | 7,47E-03 | Jmjd1c        | 0,86 | Yes |
| ENSMUSG00000037884 | -2,26E-01 | -1,929364539 | 1,13E-01  | 7,37E-01 | 9,25E-01 | 1700017G19Rik | 0,85 | No  |
| ENSMUSG00000037885 | -5,60E-02 | 5,635075171  | 6,74E-01  | 4,12E-01 | 7,07E-01 | Stk35         | 0,96 | No  |
| ENSMUSG00000037887 | -3,31E-01 | -0,401164698 | 1,00E+00  | 3,17E-01 | 6,18E-01 | Dusp8         | 0,79 | No  |
| ENSMUSG00000037890 | 3,45E-02  | 2,75695889   | 8,39E-02  | 7,72E-01 | 9,43E-01 | Wdr19         | 1,02 | No  |
| ENSMUSG00000037892 | -2,88E-02 | -2,963268425 | 3,79E-04  | 9,84E-01 | 1,00E+00 | Pcdh18        | 0,98 | No  |
| ENSMUSG00000037894 | -2,89E-02 | 7,290660709  | 2,34E-01  | 6,28E-01 | 8,61E-01 | H2afz         | 0,98 | No  |

|                    |           |              |          |          |          |               |      |     |
|--------------------|-----------|--------------|----------|----------|----------|---------------|------|-----|
| ENSMUSG00000037896 | 2,58E-02  | 6,681967897  | 1,73E-01 | 6,77E-01 | 8,92E-01 | Rcor1         | 1,02 | No  |
| ENSMUSG00000037902 | 1,95E-01  | 9,868861978  | 1,20E+01 | 5,24E-04 | 9,53E-03 | Sirpa         | 1,15 | Yes |
| ENSMUSG00000037904 | 8,64E-02  | 3,19261411   | 6,58E-01 | 4,17E-01 | 7,12E-01 | Ankrd9        | 1,06 | No  |
| ENSMUSG00000037905 | 3,91E-02  | 6,529854653  | 3,91E-01 | 5,32E-01 | 8,05E-01 | Bri3bp        | 1,03 | No  |
| ENSMUSG00000037907 | 1,54E-01  | 5,969256671  | 5,43E+00 | 1,98E-02 | 1,50E-01 | Ankrd13b      | 1,11 | No  |
| ENSMUSG00000037913 | -7,09E-02 | 3,194061866  | 4,52E-01 | 5,01E-01 | 7,86E-01 | Tmem156       | 0,95 | No  |
| ENSMUSG00000037916 | -1,88E-02 | 6,088284223  | 8,38E-02 | 7,72E-01 | 9,43E-01 | Ndufv1        | 0,99 | No  |
| ENSMUSG00000037921 | -2,83E-02 | 2,624460317  | 5,20E-02 | 8,20E-01 | 9,71E-01 | Ddx60         | 0,98 | No  |
| ENSMUSG00000037922 | -3,11E-02 | 0,592676909  | 1,68E-02 | 8,97E-01 | 1,00E+00 | Bank1         | 0,98 | No  |
| ENSMUSG00000037926 | 1,33E-01  | 6,320404534  | 4,34E+00 | 3,73E-02 | 2,30E-01 | Ssh2          | 1,10 | No  |
| ENSMUSG00000037933 | 1,05E-01  | 6,963793031  | 2,99E+00 | 8,40E-02 | 3,71E-01 | Bicd2         | 1,08 | No  |
| ENSMUSG00000037935 | -1,94E-01 | 5,461215246  | 7,80E+00 | 5,21E-03 | 5,77E-02 | Smarce1       | 0,87 | No  |
| ENSMUSG00000037936 | 1,79E-01  | 6,814174933  | 8,44E+00 | 3,67E-03 | 4,44E-02 | Scarb1        | 1,13 | Yes |
| ENSMUSG00000037938 | -5,75E-02 | 3,321146335  | 3,08E-01 | 5,79E-01 | 8,36E-01 | Chchd5        | 0,96 | No  |
| ENSMUSG00000037940 | 6,00E-01  | -0,268216983 | 3,04E+00 | 8,10E-02 | 3,65E-01 | Inpp4b        | 1,52 | No  |
| ENSMUSG00000037942 | 7,56E-01  | -2,963268003 | 3,13E-01 | 5,76E-01 | 8,34E-01 | Crp           | 1,69 | No  |
| ENSMUSG00000037944 | -8,95E-01 | 8,824704396  | 2,42E+02 | 1,24E-54 | 4,64E-51 | Ccr7          | 0,54 | Yes |
| ENSMUSG00000037946 | 3,39E-01  | 5,798480674  | 2,56E+01 | 4,15E-07 | 2,02E-05 | Fgd3          | 1,26 | Yes |
| ENSMUSG00000037949 | -4,58E-02 | 4,981727416  | 3,80E-01 | 5,37E-01 | 8,09E-01 | Ano10         | 0,97 | No  |
| ENSMUSG00000037957 | -1,11E-01 | 4,255908598  | 1,77E+00 | 1,84E-01 | 5,47E-01 | Wdr20         | 0,93 | No  |
| ENSMUSG00000037958 | -1,45E-01 | 4,277784393  | 3,03E+00 | 8,18E-02 | 3,67E-01 | Nsrp1         | 0,90 | No  |
| ENSMUSG00000037960 | 1,11E-01  | 5,467603711  | 2,50E+00 | 1,14E-01 | 4,16E-01 | Card19        | 1,08 | No  |
| ENSMUSG00000037962 | 6,56E-01  | -0,226321505 | 3,57E+00 | 5,87E-02 | 2,99E-01 | Rflna         | 1,58 | No  |
| ENSMUSG00000037965 | -1,10E-01 | 7,592004283  | 3,45E+00 | 6,32E-02 | 3,14E-01 | Zc3h7a        | 0,93 | No  |
| ENSMUSG00000037966 | -9,98E-02 | 6,332828143  | 2,46E+00 | 1,17E-01 | 4,23E-01 | Ninj1         | 0,93 | No  |
| ENSMUSG00000037971 | -1,38E-01 | 3,684999397  | 2,12E+00 | 1,45E-01 | 4,83E-01 | 1110032A03Rik | 0,91 | No  |
| ENSMUSG00000037972 | -5,98E-01 | 4,675011594  | 5,99E+01 | 1,01E-14 | 1,49E-12 | Snn           | 0,66 | Yes |
| ENSMUSG00000037974 | 1,81E+00  | -2,963282131 | 1,30E+00 | 2,54E-01 | 5,50E-01 | Muc5ac        | 3,50 | No  |
| ENSMUSG00000037977 | -7,25E-01 | 3,325327164  | 4,38E+01 | 3,72E-11 | 3,73E-09 | 6430571L13Rik | 0,60 | Yes |
| ENSMUSG00000037979 | 2,21E-01  | 0,087235608  | 5,98E-01 | 4,39E-01 | 7,32E-01 | Ccdc92        | 1,17 | No  |
| ENSMUSG00000037982 | 2,21E-01  | 2,614009251  | 3,06E+00 | 8,00E-02 | 3,62E-01 | Gm9725        | 1,17 | No  |
| ENSMUSG00000037989 | -8,06E-02 | 1,971094529  | 2,73E-01 | 6,01E-01 | 8,47E-01 | Wnk2          | 0,95 | No  |

|                    |           |              |          |          |          |          |       |     |
|--------------------|-----------|--------------|----------|----------|----------|----------|-------|-----|
| ENSMUSG00000037990 | 3,11E+00  | -2,83203996  | 3,94E+00 | 4,71E-02 | 2,60E-01 | Sh3rf3   | 8,62  | No  |
| ENSMUSG00000037991 | 1,68E-01  | 3,272352237  | 2,59E+00 | 1,07E-01 | 4,01E-01 | Rmi2     | 1,12  | No  |
| ENSMUSG00000037992 | 2,46E-01  | 7,155676998  | 1,65E+01 | 4,79E-05 | 1,31E-03 | Rara     | 1,19  | Yes |
| ENSMUSG00000037993 | 2,34E-02  | 6,55591044   | 1,40E-01 | 7,08E-01 | 9,09E-01 | Dhx38    | 1,02  | No  |
| ENSMUSG00000037994 | 3,54E+00  | -2,655104838 | 5,43E+00 | 1,98E-02 | 1,50E-01 | Slc9b2   | 11,61 | No  |
| ENSMUSG00000037995 | -1,75E-01 | 4,539410687  | 4,92E+00 | 2,65E-02 | 1,82E-01 | Igsf9    | 0,89  | No  |
| ENSMUSG00000037997 | -1,30E-01 | 4,548918987  | 2,75E+00 | 9,74E-02 | 3,89E-01 | Parp11   | 0,91  | No  |
| ENSMUSG00000037999 | -5,70E-01 | 5,823121473  | 7,36E+01 | 9,67E-18 | 1,89E-15 | Arap2    | 0,67  | Yes |
| ENSMUSG00000038000 | 1,43E-01  | 4,811951932  | 3,47E+00 | 6,24E-02 | 3,11E-01 | Acd      | 1,10  | No  |
| ENSMUSG00000038002 | 4,25E-02  | 6,110297743  | 4,32E-01 | 5,11E-01 | 7,94E-01 | Cramp1l  | 1,03  | No  |
| ENSMUSG00000038005 | 1,23E-01  | 4,904363151  | 2,65E+00 | 1,03E-01 | 3,95E-01 | Hpf1     | 1,09  | No  |
| ENSMUSG00000038007 | -5,68E-01 | -1,896044848 | 7,05E-01 | 4,01E-01 | 6,99E-01 | Acer2    | 0,67  | No  |
| ENSMUSG00000038009 | -3,60E-01 | -1,548323112 | 3,60E-01 | 5,48E-01 | 8,15E-01 | Dnajc22  | 0,78  | No  |
| ENSMUSG00000038010 | 1,08E-01  | 1,045279648  | 2,91E-01 | 5,90E-01 | 8,41E-01 | Ccdc138  | 1,08  | No  |
| ENSMUSG00000038011 | 3,68E-01  | -0,448799059 | 1,10E+00 | 2,95E-01 | 5,90E-01 | Dnah10   | 1,29  | No  |
| ENSMUSG00000038013 | -1,95E-02 | 5,472759963  | 7,99E-02 | 7,77E-01 | 9,47E-01 | Wipf2    | 0,99  | No  |
| ENSMUSG00000038014 | 7,30E-02  | 8,660148285  | 1,62E+00 | 2,02E-01 | 5,50E-01 | Fam120a  | 1,05  | No  |
| ENSMUSG00000038015 | -7,80E-01 | -1,509946451 | 1,97E+00 | 1,60E-01 | 5,08E-01 | Prm2     | 0,58  | No  |
| ENSMUSG00000038020 | 4,82E-01  | -0,424967475 | 1,96E+00 | 1,62E-01 | 5,11E-01 | Rapgef1l | 1,40  | No  |
| ENSMUSG00000038022 | 1,79E-01  | -0,042869465 | 3,73E-01 | 5,42E-01 | 8,11E-01 | Mindy4   | 1,13  | No  |
| ENSMUSG00000038023 | 2,63E-01  | 6,9765354    | 1,87E+01 | 1,55E-05 | 4,92E-04 | Atp6v0a2 | 1,20  | Yes |
| ENSMUSG00000038024 | 2,04E-01  | 6,329265734  | 1,02E+01 | 1,41E-03 | 2,13E-02 | Dennd4c  | 1,15  | Yes |
| ENSMUSG00000038025 | 1,36E-02  | 5,881625088  | 4,22E-02 | 8,37E-01 | 9,81E-01 | Phf2     | 1,01  | No  |
| ENSMUSG00000038026 | 5,32E-01  | -0,793292546 | 1,54E+00 | 2,15E-01 | 5,50E-01 | Kcnj9    | 1,45  | No  |
| ENSMUSG00000038028 | 5,40E-02  | 4,964516932  | 5,31E-01 | 4,66E-01 | 7,54E-01 | Tigar    | 1,04  | No  |
| ENSMUSG00000038034 | 2,00E-01  | 7,025103508  | 1,08E+01 | 1,01E-03 | 1,63E-02 | Igsf8    | 1,15  | Yes |
| ENSMUSG00000038037 | -8,72E-02 | 5,080790185  | 1,46E+00 | 2,27E-01 | 5,50E-01 | Socs1    | 0,94  | No  |
| ENSMUSG00000038039 | 1,12E-01  | 5,173567817  | 2,40E+00 | 1,21E-01 | 4,34E-01 | Gcc2     | 1,08  | No  |
| ENSMUSG00000038042 | -1,78E-01 | 1,672557671  | 1,14E+00 | 2,86E-01 | 5,82E-01 | Ptpdc1   | 0,88  | No  |
| ENSMUSG00000038044 | -4,13E-02 | -3,033659495 | 7,08E-04 | 9,79E-01 | 1,00E+00 | Cct8l1   | 0,97  | No  |
| ENSMUSG00000038045 | -2,76E-02 | 0,392641385  | 1,14E-02 | 9,15E-01 | 1,00E+00 | Sult6b1  | 0,98  | No  |
| ENSMUSG00000038046 | 4,29E-01  | 1,58798499   | 6,50E+00 | 1,08E-02 | 9,87E-02 | Mrm3     | 1,35  | No  |

|                    |           |              |          |          |          |          |      |     |
|--------------------|-----------|--------------|----------|----------|----------|----------|------|-----|
| ENSMUSG00000038047 | 2,90E-01  | 4,604303329  | 1,35E+01 | 2,36E-04 | 4,99E-03 | Haus6    | 1,22 | Yes |
| ENSMUSG00000038055 | -8,74E-02 | 5,552596327  | 1,64E+00 | 2,01E-01 | 5,50E-01 | Dexi     | 0,94 | No  |
| ENSMUSG00000038056 | 2,90E-04  | 6,882359034  | 2,25E-05 | 9,96E-01 | 1,00E+00 | Kmt2c    | 1,00 | No  |
| ENSMUSG00000038057 | -9,30E-01 | -2,711675158 | 6,14E-01 | 4,33E-01 | 7,27E-01 | Dbil5    | 0,52 | No  |
| ENSMUSG00000038058 | 2,60E-01  | 3,99205221   | 8,47E+00 | 3,61E-03 | 4,39E-02 | Nod1     | 1,20 | Yes |
| ENSMUSG00000038059 | -2,27E-01 | 6,448424317  | 1,28E+01 | 3,47E-04 | 6,81E-03 | Smim3    | 0,85 | Yes |
| ENSMUSG00000038060 | 1,21E-01  | 0,409209655  | 2,40E-01 | 6,24E-01 | 8,59E-01 | Dlec1    | 1,09 | No  |
| ENSMUSG00000038064 | 2,27E+00  | -2,963288049 | 1,97E+00 | 1,60E-01 | 5,09E-01 | Cldn22   | 4,81 | No  |
| ENSMUSG00000038065 | -7,61E-02 | 3,339224411  | 5,59E-01 | 4,55E-01 | 7,44E-01 | Mturn    | 0,95 | No  |
| ENSMUSG00000038067 | 1,59E+00  | -2,600675254 | 1,74E+00 | 1,88E-01 | 5,50E-01 | Csf3     | 3,01 | No  |
| ENSMUSG00000038068 | 2,87E-01  | 4,929045796  | 1,46E+01 | 1,30E-04 | 3,03E-03 | Rnf144b  | 1,22 | Yes |
| ENSMUSG00000038069 | -5,20E-02 | 3,92394781   | 3,32E-01 | 5,64E-01 | 8,27E-01 | Cdkn2aip | 0,96 | No  |
| ENSMUSG00000038070 | 1,23E-01  | 3,383008311  | 1,48E+00 | 2,24E-01 | 5,50E-01 | Cntln    | 1,09 | No  |
| ENSMUSG00000038072 | 8,94E-03  | 5,140888545  | 1,54E-02 | 9,01E-01 | 1,00E+00 | Galnt11  | 1,01 | No  |
| ENSMUSG00000038074 | 4,82E-01  | 1,017265909  | 5,25E+00 | 2,20E-02 | 1,60E-01 | Fkbp14   | 1,40 | No  |
| ENSMUSG00000038077 | -1,87E+00 | -3,107637761 | 1,39E+00 | 2,38E-01 | 5,50E-01 | Kcna6    | 0,27 | No  |
| ENSMUSG00000038079 | 3,46E-01  | 2,591608149  | 7,47E+00 | 6,26E-03 | 6,63E-02 | Tmem237  | 1,27 | No  |
| ENSMUSG00000038080 | -2,72E-02 | 5,474305907  | 1,56E-01 | 6,93E-01 | 9,01E-01 | Kdm1b    | 0,98 | No  |
| ENSMUSG00000038084 | -5,83E-03 | 6,125007131  | 8,13E-03 | 9,28E-01 | 1,00E+00 | Opa1     | 1,00 | No  |
| ENSMUSG00000038085 | 8,30E-02  | 4,951816334  | 1,22E+00 | 2,69E-01 | 5,65E-01 | Cnbd2    | 1,06 | No  |
| ENSMUSG00000038086 | 4,44E-02  | -1,472929592 | 6,21E-03 | 9,37E-01 | 1,00E+00 | Hspb2    | 1,03 | No  |
| ENSMUSG00000038094 | -1,92E-01 | 0,897243052  | 8,75E-01 | 3,50E-01 | 6,51E-01 | Atp13a4  | 0,88 | No  |
| ENSMUSG00000038095 | -4,09E-02 | 7,241459664  | 4,66E-01 | 4,95E-01 | 7,80E-01 | Sbno1    | 0,97 | No  |
| ENSMUSG00000038102 | 7,38E-02  | 6,022645915  | 1,28E+00 | 2,58E-01 | 5,50E-01 | Trappc11 | 1,05 | No  |
| ENSMUSG00000038112 | -1,87E+00 | -3,03364178  | 1,41E+00 | 2,36E-01 | 5,50E-01 | AW551984 | 0,27 | No  |
| ENSMUSG00000038115 | 1,24E+00  | -0,929368192 | 7,11E+00 | 7,66E-03 | 7,66E-02 | Ano2     | 2,35 | No  |
| ENSMUSG00000038116 | -1,21E-01 | 5,194266727  | 2,85E+00 | 9,13E-02 | 3,82E-01 | Phf20    | 0,92 | No  |
| ENSMUSG00000038119 | -2,19E-01 | 3,419873356  | 4,89E+00 | 2,70E-02 | 1,84E-01 | Cdon     | 0,86 | No  |
| ENSMUSG00000038121 | 1,79E-01  | 5,401609613  | 6,54E+00 | 1,05E-02 | 9,72E-02 | Fam210a  | 1,13 | No  |
| ENSMUSG00000038122 | 1,12E-02  | 3,523185856  | 1,27E-02 | 9,10E-01 | 1,00E+00 | Tbc1d32  | 1,01 | No  |
| ENSMUSG00000038126 | 6,19E-02  | 4,083956298  | 5,03E-01 | 4,78E-01 | 7,66E-01 | Mphosph9 | 1,04 | No  |
| ENSMUSG00000038127 | -1,14E-01 | 7,738602815  | 3,78E+00 | 5,20E-02 | 2,78E-01 | Ccdc50   | 0,92 | No  |

|                    |           |              |          |          |          |               |      |     |
|--------------------|-----------|--------------|----------|----------|----------|---------------|------|-----|
| ENSMUSG00000038128 | 1,67E-01  | -0,165861074 | 2,80E-01 | 5,97E-01 | 8,45E-01 | Camk4         | 1,12 | No  |
| ENSMUSG00000038132 | 1,85E+00  | -3,107657832 | 1,35E+00 | 2,46E-01 | 5,50E-01 | Rbm24         | 3,61 | No  |
| ENSMUSG00000038135 | -2,85E-01 | -1,548166013 | 2,47E-01 | 6,19E-01 | 8,56E-01 | Crygn         | 0,82 | No  |
| ENSMUSG00000038141 | 1,72E-01  | 5,275837942  | 5,85E+00 | 1,56E-02 | 1,29E-01 | Tmem181a      | 1,13 | No  |
| ENSMUSG00000038143 | -3,29E-01 | 1,432600113  | 3,52E+00 | 6,07E-02 | 3,05E-01 | Stox2         | 0,80 | No  |
| ENSMUSG00000038145 | 8,72E-02  | 5,172873005  | 1,48E+00 | 2,23E-01 | 5,50E-01 | Snrk          | 1,06 | No  |
| ENSMUSG00000038146 | -5,82E-03 | -0,541887915 | 2,39E-04 | 9,88E-01 | 1,00E+00 | Notch3        | 1,00 | No  |
| ENSMUSG00000038147 | 1,33E-01  | 8,380634591  | 5,30E+00 | 2,13E-02 | 1,57E-01 | Cd84          | 1,10 | No  |
| ENSMUSG00000038150 | 1,36E-01  | 3,615798752  | 2,00E+00 | 1,57E-01 | 5,02E-01 | Ormdl3        | 1,10 | No  |
| ENSMUSG00000038151 | -1,01E-01 | 5,369898513  | 2,02E+00 | 1,55E-01 | 4,99E-01 | Prdm1         | 0,93 | No  |
| ENSMUSG00000038152 | -2,54E-01 | -1,051727072 | 3,54E-01 | 5,52E-01 | 8,18E-01 | 5033430I15Rik | 0,84 | No  |
| ENSMUSG00000038155 | -2,06E-01 | 1,63789072   | 1,51E+00 | 2,19E-01 | 5,50E-01 | Gstp2         | 0,87 | No  |
| ENSMUSG00000038156 | 6,18E-02  | 1,382439038  | 1,19E-01 | 7,31E-01 | 9,21E-01 | Spon1         | 1,04 | No  |
| ENSMUSG00000038160 | 1,44E-02  | 5,80693476   | 4,67E-02 | 8,29E-01 | 9,76E-01 | Atg5          | 1,01 | No  |
| ENSMUSG00000038167 | 7,95E-02  | 1,327686789  | 1,68E-01 | 6,81E-01 | 8,94E-01 | Plekhg6       | 1,06 | No  |
| ENSMUSG00000038168 | -5,15E-01 | 1,488429566  | 9,55E+00 | 2,00E-03 | 2,80E-02 | P3h2          | 0,70 | Yes |
| ENSMUSG00000038170 | -6,10E-02 | 5,606585758  | 8,13E-01 | 3,67E-01 | 6,68E-01 | Pde4dip       | 0,96 | No  |
| ENSMUSG00000038172 | -2,73E-02 | 6,318282974  | 1,84E-01 | 6,68E-01 | 8,87E-01 | Ttc39b        | 0,98 | No  |
| ENSMUSG00000038173 | 9,95E-01  | -0,535587986 | 5,93E+00 | 1,49E-02 | 1,25E-01 | Enpp6         | 1,99 | No  |
| ENSMUSG00000038174 | 2,45E-02  | 4,09583489   | 8,03E-02 | 7,77E-01 | 9,46E-01 | Fam126b       | 1,02 | No  |
| ENSMUSG00000038175 | 4,37E-01  | 4,253238624  | 2,63E+01 | 2,97E-07 | 1,49E-05 | Myliip        | 1,35 | Yes |
| ENSMUSG00000038178 | 2,30E-01  | 7,891616549  | 1,55E+01 | 8,12E-05 | 2,04E-03 | Slc43a2       | 1,17 | Yes |
| ENSMUSG00000038179 | -2,43E-02 | 7,568090854  | 1,70E-01 | 6,81E-01 | 8,93E-01 | Slamf7        | 0,98 | No  |
| ENSMUSG00000038180 | 8,79E-01  | -1,963321155 | 1,19E+00 | 2,76E-01 | 5,73E-01 | Spag4         | 1,84 | No  |
| ENSMUSG00000038181 | 9,15E-02  | 6,346438396  | 2,07E+00 | 1,50E-01 | 4,91E-01 | Chpf2         | 1,07 | No  |
| ENSMUSG00000038187 | -4,92E-02 | 4,622206733  | 3,93E-01 | 5,31E-01 | 8,05E-01 | Btbd10        | 0,97 | No  |
| ENSMUSG00000038188 | -1,67E-01 | 4,396132613  | 4,20E+00 | 4,05E-02 | 2,38E-01 | Scarf1        | 0,89 | No  |
| ENSMUSG00000038195 | 1,37E-01  | 2,887134721  | 1,41E+00 | 2,35E-01 | 5,50E-01 | Rilp          | 1,10 | No  |
| ENSMUSG00000038199 | 2,65E+00  | -2,896160752 | 2,71E+00 | 9,96E-02 | 3,92E-01 | 4931409K22Rik | 6,29 | No  |
| ENSMUSG00000038201 | -5,54E-01 | -2,711664916 | 2,40E-01 | 6,24E-01 | 8,59E-01 | Kcna7         | 0,68 | No  |
| ENSMUSG00000038204 | -7,46E-01 | -2,548214788 | 6,23E-01 | 4,30E-01 | 7,23E-01 | Asb10         | 0,60 | No  |
| ENSMUSG00000038205 | 1,70E-01  | 3,256050013  | 2,65E+00 | 1,04E-01 | 3,96E-01 | Prkab2        | 1,12 | No  |

|                    |           |              |          |          |          |          |      |     |
|--------------------|-----------|--------------|----------|----------|----------|----------|------|-----|
| ENSMUSG00000038206 | 8,08E-02  | 4,356375758  | 9,46E-01 | 3,31E-01 | 6,31E-01 | Fbxo8    | 1,06 | No  |
| ENSMUSG00000038208 | 1,47E-01  | 2,085040148  | 9,76E-01 | 3,23E-01 | 6,23E-01 | Pgap3    | 1,11 | No  |
| ENSMUSG00000038209 | -1,94E+00 | -3,107619243 | 1,50E+00 | 2,21E-01 | 5,50E-01 | Itln1    | 0,26 | No  |
| ENSMUSG00000038212 | 4,11E-02  | 6,854766409  | 4,51E-01 | 5,02E-01 | 7,87E-01 | Mfsd14b  | 1,03 | No  |
| ENSMUSG00000038213 | -3,03E-01 | 4,914196729  | 1,65E+01 | 4,77E-05 | 1,31E-03 | Tapbpl   | 0,81 | Yes |
| ENSMUSG00000038214 | 2,11E-02  | 3,303606552  | 4,01E-02 | 8,41E-01 | 9,84E-01 | Bend3    | 1,01 | No  |
| ENSMUSG00000038215 | 9,81E-03  | 3,436605822  | 9,46E-03 | 9,23E-01 | 1,00E+00 | Cep44    | 1,01 | No  |
| ENSMUSG00000038217 | 4,58E-02  | 2,511348396  | 1,28E-01 | 7,20E-01 | 9,16E-01 | Tlcd2    | 1,03 | No  |
| ENSMUSG00000038224 | 4,01E-01  | -0,816441575 | 9,23E-01 | 3,37E-01 | 6,37E-01 | Serpinf2 | 1,32 | No  |
| ENSMUSG00000038225 | -1,98E-01 | 3,554093281  | 4,17E+00 | 4,12E-02 | 2,41E-01 | Primpol  | 0,87 | No  |
| ENSMUSG00000038227 | -2,70E+00 | -2,770604422 | 2,88E+00 | 8,96E-02 | 3,80E-01 | Hoxa9    | 0,15 | No  |
| ENSMUSG00000038233 | -6,14E-01 | 2,192217085  | 2,06E+01 | 5,76E-06 | 2,05E-04 | Fam198a  | 0,65 | Yes |
| ENSMUSG00000038235 | 3,81E-01  | 4,48445709   | 2,20E+01 | 2,66E-06 | 1,04E-04 | F11r     | 1,30 | Yes |
| ENSMUSG00000038236 | 4,18E-01  | -2,683158522 | 1,37E-01 | 7,12E-01 | 9,11E-01 | Hoxa7    | 1,34 | No  |
| ENSMUSG00000038239 | 6,15E-01  | -2,088875291 | 7,67E-01 | 3,81E-01 | 6,83E-01 | Hrc      | 1,53 | No  |
| ENSMUSG00000038240 | -3,24E-02 | 2,495776999  | 6,27E-02 | 8,02E-01 | 9,61E-01 | Pdss2    | 0,98 | No  |
| ENSMUSG00000038241 | 1,24E-01  | 7,022079333  | 4,18E+00 | 4,10E-02 | 2,40E-01 | Cep250   | 1,09 | No  |
| ENSMUSG00000038242 | 1,84E+00  | -3,107648531 | 1,33E+00 | 2,49E-01 | 5,50E-01 | Aox4     | 3,58 | No  |
| ENSMUSG00000038244 | 3,83E-01  | 6,623430976  | 3,74E+01 | 9,85E-10 | 8,07E-08 | Mical2   | 1,30 | Yes |
| ENSMUSG00000038248 | -1,36E-01 | 3,458460032  | 1,87E+00 | 1,72E-01 | 5,28E-01 | Sobp     | 0,91 | No  |
| ENSMUSG00000038250 | 1,73E-01  | 5,401804289  | 6,13E+00 | 1,33E-02 | 1,15E-01 | Usp38    | 1,13 | No  |
| ENSMUSG00000038252 | 2,30E-01  | 6,735826954  | 1,39E+01 | 1,94E-04 | 4,24E-03 | Ncapd2   | 1,17 | Yes |
| ENSMUSG00000038253 | 3,11E-01  | -2,070085709 | 1,78E-01 | 6,73E-01 | 8,90E-01 | Hoxa5    | 1,24 | No  |
| ENSMUSG00000038256 | -1,34E-01 | 4,20786302   | 2,50E+00 | 1,14E-01 | 4,17E-01 | Bcl9     | 0,91 | No  |
| ENSMUSG00000038257 | -7,38E-02 | -3,033634644 | 2,66E-03 | 9,59E-01 | 1,00E+00 | Glra3    | 0,95 | No  |
| ENSMUSG00000038259 | -1,87E+00 | -3,107637761 | 1,39E+00 | 2,38E-01 | 5,50E-01 | Gdf5     | 0,27 | No  |
| ENSMUSG00000038260 | 2,36E-01  | 4,537169204  | 8,61E+00 | 3,35E-03 | 4,15E-02 | Trpm4    | 1,18 | Yes |
| ENSMUSG00000038264 | -9,38E-01 | 5,446491792  | 1,84E+02 | 6,61E-42 | 9,48E-39 | Sema7a   | 0,52 | Yes |
| ENSMUSG00000038267 | -7,13E-01 | 5,894877326  | 1,17E+02 | 2,67E-27 | 1,18E-24 | Slc22a23 | 0,61 | Yes |
| ENSMUSG00000038268 | 3,58E-02  | 3,890654021  | 1,56E-01 | 6,93E-01 | 9,01E-01 | Ovca2    | 1,03 | No  |
| ENSMUSG00000038271 | -1,05E-01 | 5,039067767  | 2,08E+00 | 1,49E-01 | 4,90E-01 | lffo1    | 0,93 | No  |
| ENSMUSG00000038274 | -3,34E-01 | 5,116009307  | 2,11E+01 | 4,27E-06 | 1,58E-04 | Fau      | 0,79 | Yes |



|                    |           |              |          |          |          |               |      |     |
|--------------------|-----------|--------------|----------|----------|----------|---------------|------|-----|
| ENSMUSG00000038276 | -2,86E-02 | -0,26802302  | 7,88E-03 | 9,29E-01 | 1,00E+00 | Asic3         | 0,98 | No  |
| ENSMUSG00000038279 | 9,77E-02  | 5,315766777  | 1,92E+00 | 1,66E-01 | 5,19E-01 | Nop2          | 1,07 | No  |
| ENSMUSG00000038280 | 1,08E-01  | 6,670021328  | 3,03E+00 | 8,17E-02 | 3,67E-01 | Ostm1         | 1,08 | No  |
| ENSMUSG00000038286 | -2,38E-01 | 3,228069356  | 5,21E+00 | 2,25E-02 | 1,63E-01 | Bphl          | 0,85 | No  |
| ENSMUSG00000038290 | -1,77E-01 | 5,034225003  | 5,83E+00 | 1,57E-02 | 1,30E-01 | Smg6          | 0,88 | No  |
| ENSMUSG00000038291 | 1,29E-01  | 5,170383387  | 3,18E+00 | 7,46E-02 | 3,47E-01 | Snx25         | 1,09 | No  |
| ENSMUSG00000038292 | 6,08E-01  | -2,497668314 | 4,12E-01 | 5,21E-01 | 7,99E-01 | Ccdc155       | 1,52 | No  |
| ENSMUSG00000038295 | 3,19E-01  | 1,909448404  | 4,18E+00 | 4,10E-02 | 2,40E-01 | Atg9b         | 1,25 | No  |
| ENSMUSG00000038296 | 1,22E+00  | -2,770635322 | 9,26E-01 | 3,36E-01 | 6,37E-01 | Galnt18       | 2,33 | No  |
| ENSMUSG00000038298 | 2,01E-01  | 2,128616718  | 1,89E+00 | 1,69E-01 | 5,24E-01 | Pdzk1         | 1,15 | No  |
| ENSMUSG00000038299 | 1,93E-02  | 4,75314317   | 6,20E-02 | 8,03E-01 | 9,62E-01 | Wdr36         | 1,01 | No  |
| ENSMUSG00000038301 | -2,61E-02 | 6,475700219  | 1,73E-01 | 6,78E-01 | 8,92E-01 | Snx10         | 0,98 | No  |
| ENSMUSG00000038302 | 2,23E-01  | 3,315212798  | 4,45E+00 | 3,49E-02 | 2,21E-01 | Afg1l         | 1,17 | No  |
| ENSMUSG00000038304 | -1,41E-01 | 0,710580932  | 3,34E-01 | 5,63E-01 | 8,26E-01 | Cd160         | 0,91 | No  |
| ENSMUSG00000038312 | 1,00E-01  | 6,217213665  | 2,43E+00 | 1,19E-01 | 4,30E-01 | Edem2         | 1,07 | No  |
| ENSMUSG00000038319 | -8,37E-01 | -2,832007507 | 3,84E-01 | 5,35E-01 | 8,08E-01 | Kcnh2         | 0,56 | No  |
| ENSMUSG00000038323 | 2,53E-01  | 3,323965723  | 6,11E+00 | 1,34E-02 | 1,16E-01 | 1700066M21Rik | 1,19 | No  |
| ENSMUSG00000038324 | -1,86E-02 | 7,328881407  | 9,68E-02 | 7,56E-01 | 9,34E-01 | Trpc4ap       | 0,99 | No  |
| ENSMUSG00000038331 | 1,37E-01  | 1,615785664  | 6,30E-01 | 4,28E-01 | 7,21E-01 | Satb2         | 1,10 | No  |
| ENSMUSG00000038332 | 7,84E-02  | 4,473645284  | 9,44E-01 | 3,31E-01 | 6,32E-01 | Sesn1         | 1,06 | No  |
| ENSMUSG00000038335 | 5,83E-02  | 5,15167082   | 6,47E-01 | 4,21E-01 | 7,16E-01 | Tsr1          | 1,04 | No  |
| ENSMUSG00000038342 | -1,09E-02 | 7,358844037  | 3,35E-02 | 8,55E-01 | 9,92E-01 | Mlxip         | 0,99 | No  |
| ENSMUSG00000038346 | 4,67E-02  | 6,16547001   | 5,23E-01 | 4,69E-01 | 7,58E-01 | Zfp384        | 1,03 | No  |
| ENSMUSG00000038347 | 1,31E-01  | 0,206768175  | 2,22E-01 | 6,37E-01 | 8,68E-01 | Tcte2         | 1,09 | No  |
| ENSMUSG00000038349 | -2,13E-01 | 2,796422864  | 3,20E+00 | 7,38E-02 | 3,45E-01 | Plcl1         | 0,86 | No  |
| ENSMUSG00000038351 | -1,95E-01 | 4,485624443  | 5,80E+00 | 1,60E-02 | 1,32E-01 | Sgsm2         | 0,87 | No  |
| ENSMUSG00000038352 | -1,92E-01 | 6,009394518  | 8,74E+00 | 3,11E-03 | 3,94E-02 | Arl5c         | 0,88 | Yes |
| ENSMUSG00000038354 | -6,80E-01 | 0,563415067  | 7,91E+00 | 4,92E-03 | 5,53E-02 | Ankrd35       | 0,62 | No  |
| ENSMUSG00000038357 | -1,87E+00 | -2,448655261 | 4,10E+00 | 4,28E-02 | 2,46E-01 | Camp          | 0,27 | No  |
| ENSMUSG00000038365 | 4,92E-02  | 3,668948763  | 2,68E-01 | 6,05E-01 | 8,49E-01 | Fbxo25        | 1,03 | No  |
| ENSMUSG00000038366 | -3,62E-02 | 8,573422734  | 3,99E-01 | 5,27E-01 | 8,04E-01 | Lasp1         | 0,98 | No  |
| ENSMUSG00000038368 | 1,92E-01  | 3,747595392  | 4,14E+00 | 4,20E-02 | 2,44E-01 | Focad         | 1,14 | No  |

|                    |           |              |          |          |          |               |      |     |
|--------------------|-----------|--------------|----------|----------|----------|---------------|------|-----|
| ENSMUSG00000038369 | -3,71E-02 | 7,056530462  | 3,76E-01 | 5,40E-01 | 8,10E-01 | Ncoa6         | 0,97 | No  |
| ENSMUSG00000038370 | -5,65E-01 | -1,83200669  | 6,99E-01 | 4,03E-01 | 7,01E-01 | Pcp4l1        | 0,68 | No  |
| ENSMUSG00000038371 | -3,15E-02 | 6,143746205  | 2,38E-01 | 6,26E-01 | 8,60E-01 | Sbf2          | 0,98 | No  |
| ENSMUSG00000038372 | 1,26E-01  | 3,03421666   | 1,27E+00 | 2,60E-01 | 5,53E-01 | Gmds          | 1,09 | No  |
| ENSMUSG00000038374 | -4,10E-02 | 4,137780254  | 2,29E-01 | 6,32E-01 | 8,64E-01 | Rbm8a         | 0,97 | No  |
| ENSMUSG00000038375 | 9,60E-02  | 6,761037594  | 2,43E+00 | 1,19E-01 | 4,30E-01 | Trp53inp2     | 1,07 | No  |
| ENSMUSG00000038379 | 1,72E-01  | 3,291094695  | 2,78E+00 | 9,55E-02 | 3,86E-01 | Ttk           | 1,13 | No  |
| ENSMUSG00000038383 | 1,24E-01  | 4,323357818  | 2,22E+00 | 1,37E-01 | 4,66E-01 | Pigu          | 1,09 | No  |
| ENSMUSG00000038384 | 1,76E-01  | 6,109859065  | 7,46E+00 | 6,29E-03 | 6,65E-02 | Setd1b        | 1,13 | No  |
| ENSMUSG00000038387 | -7,97E-02 | 4,867085571  | 1,11E+00 | 2,92E-01 | 5,87E-01 | Rras          | 0,95 | No  |
| ENSMUSG00000038388 | 1,41E-01  | 6,441636899  | 5,01E+00 | 2,52E-02 | 1,76E-01 | Mpp6          | 1,10 | No  |
| ENSMUSG00000038390 | -2,04E-01 | 0,848960648  | 9,03E-01 | 3,42E-01 | 6,42E-01 | Gpr162        | 0,87 | No  |
| ENSMUSG00000038393 | 4,83E-02  | 8,566720815  | 7,08E-01 | 4,00E-01 | 6,99E-01 | Txnip         | 1,03 | No  |
| ENSMUSG00000038398 | -1,32E-02 | 4,332175249  | 2,51E-02 | 8,74E-01 | 1,00E+00 | Upf3a         | 0,99 | No  |
| ENSMUSG00000038400 | 3,10E-01  | 3,278297035  | 8,76E+00 | 3,07E-03 | 3,90E-02 | Pmepa1        | 1,24 | Yes |
| ENSMUSG00000038402 | 7,50E-01  | 1,913851432  | 2,33E+01 | 1,41E-06 | 6,00E-05 | Foxf2         | 1,68 | Yes |
| ENSMUSG00000038406 | -4,33E-02 | 6,739638879  | 4,95E-01 | 4,82E-01 | 7,69E-01 | Scaf1         | 0,97 | No  |
| ENSMUSG00000038408 | 1,26E+00  | -2,448689246 | 1,57E+00 | 2,10E-01 | 5,50E-01 | 1700018A04Rik | 2,40 | No  |
| ENSMUSG00000038412 | 2,95E-01  | 3,189572404  | 7,45E+00 | 6,35E-03 | 6,69E-02 | Higd1a        | 1,23 | No  |
| ENSMUSG00000038415 | -1,04E-01 | 0,483554364  | 1,65E-01 | 6,85E-01 | 8,97E-01 | Foxq1         | 0,93 | No  |
| ENSMUSG00000038416 | 9,59E-02  | 4,84592721   | 1,60E+00 | 2,06E-01 | 5,50E-01 | Cdc16         | 1,07 | No  |
| ENSMUSG00000038417 | 1,78E-01  | 5,431959711  | 6,44E+00 | 1,12E-02 | 1,01E-01 | Fig4          | 1,13 | No  |
| ENSMUSG00000038418 | 5,61E-01  | 7,776425933  | 8,88E+01 | 4,48E-21 | 1,11E-18 | Egr1          | 1,48 | Yes |
| ENSMUSG00000038421 | 4,40E-02  | 1,120288461  | 4,85E-02 | 8,26E-01 | 9,74E-01 | Fcrla         | 1,03 | No  |
| ENSMUSG00000038422 | 1,05E-01  | -0,268090964 | 1,08E-01 | 7,43E-01 | 9,28E-01 | Hdhd3         | 1,08 | No  |
| ENSMUSG00000038425 | 1,20E-03  | 3,270040998  | 1,38E-04 | 9,91E-01 | 1,00E+00 | Poli          | 1,00 | No  |
| ENSMUSG00000038429 | 7,75E-02  | 6,654232479  | 1,56E+00 | 2,11E-01 | 5,50E-01 | Usp5          | 1,06 | No  |
| ENSMUSG00000038437 | -2,99E-01 | 8,2117328    | 2,67E+01 | 2,36E-07 | 1,22E-05 | Mllt6         | 0,81 | Yes |
| ENSMUSG00000038446 | 1,41E-01  | 5,041847481  | 3,67E+00 | 5,55E-02 | 2,89E-01 | Cdc40         | 1,10 | No  |
| ENSMUSG00000038451 | 8,56E-02  | 3,886617837  | 8,81E-01 | 3,48E-01 | 6,49E-01 | Spsb2         | 1,06 | No  |
| ENSMUSG00000038453 | -3,66E-01 | -2,185609931 | 1,69E-01 | 6,81E-01 | 8,94E-01 | Srcin1        | 0,78 | No  |
| ENSMUSG00000038456 | 3,19E-01  | 5,060993802  | 1,85E+01 | 1,70E-05 | 5,36E-04 | Dennd2a       | 1,25 | Yes |

|                    |           |              |          |          |          |               |      |     |
|--------------------|-----------|--------------|----------|----------|----------|---------------|------|-----|
| ENSMUSG00000038457 | 7,46E-01  | -2,015634632 | 9,94E-01 | 3,19E-01 | 6,19E-01 | Tmem255b      | 1,68 | No  |
| ENSMUSG00000038459 | 2,16E-02  | 5,430997386  | 9,47E-02 | 7,58E-01 | 9,36E-01 | Abhd17c       | 1,02 | No  |
| ENSMUSG00000038462 | 1,21E-01  | 7,119554043  | 4,02E+00 | 4,50E-02 | 2,53E-01 | Uqcrfs1       | 1,09 | No  |
| ENSMUSG00000038463 | 8,41E-02  | 0,789012409  | 1,46E-01 | 7,03E-01 | 9,06E-01 | Olfml2b       | 1,06 | No  |
| ENSMUSG00000038467 | -1,89E-02 | 7,731783088  | 1,03E-01 | 7,48E-01 | 9,30E-01 | Chmp4b        | 0,99 | No  |
| ENSMUSG00000038473 | -1,86E-02 | 1,912462802  | 1,49E-02 | 9,03E-01 | 1,00E+00 | Nos1ap        | 0,99 | No  |
| ENSMUSG00000038481 | 5,29E-02  | 5,863142475  | 6,33E-01 | 4,26E-01 | 7,20E-01 | Cdk19         | 1,04 | No  |
| ENSMUSG00000038482 | 3,31E-02  | 5,900103102  | 2,52E-01 | 6,15E-01 | 8,54E-01 | Tfdp1         | 1,02 | No  |
| ENSMUSG00000038485 | 2,20E-02  | 5,585580783  | 1,04E-01 | 7,47E-01 | 9,30E-01 | Socs7         | 1,02 | No  |
| ENSMUSG00000038486 | -9,92E-01 | -1,268049738 | 4,07E+00 | 4,38E-02 | 2,49E-01 | Sv2a          | 0,50 | No  |
| ENSMUSG00000038489 | 9,21E-02  | 3,291671445  | 7,60E-01 | 3,83E-01 | 6,85E-01 | Polr2l        | 1,07 | No  |
| ENSMUSG00000038491 | -1,49E-01 | -0,793157631 | 1,35E-01 | 7,13E-01 | 9,11E-01 | Cdk19os       | 0,90 | No  |
| ENSMUSG00000038495 | -1,93E-01 | 4,965296996  | 6,96E+00 | 8,32E-03 | 8,16E-02 | Otud7b        | 0,87 | No  |
| ENSMUSG00000038497 | 1,74E-02  | 5,104830435  | 5,66E-02 | 8,12E-01 | 9,67E-01 | Tmco3         | 1,01 | No  |
| ENSMUSG00000038500 | 2,64E-02  | 4,282037884  | 9,98E-02 | 7,52E-01 | 9,32E-01 | Prr3          | 1,02 | No  |
| ENSMUSG00000038502 | -1,06E-01 | 5,497642631  | 2,35E+00 | 1,26E-01 | 4,44E-01 | Ptov1         | 0,93 | No  |
| ENSMUSG00000038503 | 2,26E-01  | 5,413733673  | 1,05E+01 | 1,22E-03 | 1,91E-02 | Mesd          | 1,17 | Yes |
| ENSMUSG00000038506 | 1,37E-01  | 4,716857542  | 3,16E+00 | 7,56E-02 | 3,50E-01 | Dcun1d2       | 1,10 | No  |
| ENSMUSG00000038507 | 4,05E-02  | 5,821084022  | 3,73E-01 | 5,42E-01 | 8,11E-01 | Parp12        | 1,03 | No  |
| ENSMUSG00000038508 | 1,05E-01  | 4,725044489  | 1,85E+00 | 1,74E-01 | 5,31E-01 | Gdf15         | 1,08 | No  |
| ENSMUSG00000038510 | 3,36E-02  | 2,656524011  | 7,20E-02 | 7,88E-01 | 9,54E-01 | Rpf2          | 1,02 | No  |
| ENSMUSG00000038515 | -3,75E-02 | 6,385351545  | 3,50E-01 | 5,54E-01 | 8,20E-01 | Grtp1         | 0,97 | No  |
| ENSMUSG00000038517 | 1,24E-01  | 5,681468124  | 3,33E+00 | 6,80E-02 | 3,28E-01 | Tbkbp1        | 1,09 | No  |
| ENSMUSG00000038518 | -2,61E-01 | 5,825086762  | 1,53E+01 | 9,14E-05 | 2,25E-03 | Jarid2        | 0,83 | Yes |
| ENSMUSG00000038520 | -6,15E-01 | 7,465269855  | 1,08E+02 | 2,79E-25 | 1,01E-22 | Tbc1d17       | 0,65 | Yes |
| ENSMUSG00000038521 | -5,07E-01 | -1,278608176 | 1,07E+00 | 3,00E-01 | 5,97E-01 | C1s1          | 0,70 | No  |
| ENSMUSG00000038522 | 2,25E+00  | -1,879942223 | 8,20E+00 | 4,18E-03 | 4,89E-02 | Mfsd4b1       | 4,76 | Yes |
| ENSMUSG00000038523 | 7,09E-01  | -1,088840451 | 2,43E+00 | 1,19E-01 | 4,29E-01 | 1700003F12Rik | 1,63 | No  |
| ENSMUSG00000038524 | -6,31E-02 | 3,974110637  | 5,06E-01 | 4,77E-01 | 7,65E-01 | Fchsd1        | 0,96 | No  |
| ENSMUSG00000038525 | -9,33E-02 | 4,986860908  | 1,60E+00 | 2,06E-01 | 5,50E-01 | Armc10        | 0,94 | No  |
| ENSMUSG00000038526 | 9,83E-02  | 1,363890081  | 2,72E-01 | 6,02E-01 | 8,48E-01 | Car14         | 1,07 | No  |
| ENSMUSG00000038527 | -4,69E-02 | 2,63120277   | 1,41E-01 | 7,07E-01 | 9,08E-01 | C1rl          | 0,97 | No  |

|                    |           |              |          |          |          |          |      |     |
|--------------------|-----------|--------------|----------|----------|----------|----------|------|-----|
| ENSMUSG00000038528 | 1,44E-01  | -1,146190981 | 1,02E-01 | 7,49E-01 | 9,31E-01 | Mfsd4b5  | 1,11 | No  |
| ENSMUSG00000038530 | -8,32E-01 | -2,896143825 | 3,80E-01 | 5,38E-01 | 8,09E-01 | Rgs4     | 0,56 | No  |
| ENSMUSG00000038533 | 9,39E-02  | 4,718062885  | 1,46E+00 | 2,27E-01 | 5,50E-01 | Cbfa2t2  | 1,07 | No  |
| ENSMUSG00000038534 | 1,02E-01  | 4,485354313  | 1,63E+00 | 2,01E-01 | 5,50E-01 | Osbpl7   | 1,07 | No  |
| ENSMUSG00000038535 | -2,14E-02 | 4,376191083  | 6,88E-02 | 7,93E-01 | 9,56E-01 | Zfp280d  | 0,99 | No  |
| ENSMUSG00000038538 | 5,60E-02  | 6,884997404  | 8,42E-01 | 3,59E-01 | 6,60E-01 | Ubn2     | 1,04 | No  |
| ENSMUSG00000038539 | 9,82E-03  | 4,7913965    | 1,65E-02 | 8,98E-01 | 1,00E+00 | Atf5     | 1,01 | No  |
| ENSMUSG00000038540 | -4,87E-02 | -0,824093444 | 1,48E-02 | 9,03E-01 | 1,00E+00 | Tmc3     | 0,97 | No  |
| ENSMUSG00000038542 | 8,89E-02  | 5,312464094  | 1,56E+00 | 2,11E-01 | 5,50E-01 | Pcid2    | 1,06 | No  |
| ENSMUSG00000038543 | 2,16E-01  | 3,829361807  | 5,37E+00 | 2,05E-02 | 1,54E-01 | BC028528 | 1,16 | No  |
| ENSMUSG00000038544 | 9,98E-02  | 5,332134013  | 2,00E+00 | 1,57E-01 | 5,02E-01 | Inip     | 1,07 | No  |
| ENSMUSG00000038545 | -2,97E-01 | 4,320221991  | 1,31E+01 | 2,96E-04 | 5,98E-03 | Cul7     | 0,81 | Yes |
| ENSMUSG00000038546 | -1,72E-02 | 6,379624262  | 7,43E-02 | 7,85E-01 | 9,52E-01 | Ranbp9   | 0,99 | No  |
| ENSMUSG00000038550 | 4,44E-01  | 1,210167085  | 5,41E+00 | 2,00E-02 | 1,51E-01 | Ciart    | 1,36 | No  |
| ENSMUSG00000038552 | -5,27E-01 | -0,587129942 | 2,11E+00 | 1,47E-01 | 4,85E-01 | Fndc4    | 0,69 | No  |
| ENSMUSG00000038555 | 2,44E-01  | -1,627653791 | 2,01E-01 | 6,54E-01 | 8,79E-01 | Reep2    | 1,18 | No  |
| ENSMUSG00000038560 | -6,42E-01 | -2,333204796 | 6,30E-01 | 4,27E-01 | 7,21E-01 | Sp6      | 0,64 | No  |
| ENSMUSG00000038563 | 1,24E-01  | 4,108658505  | 2,04E+00 | 1,53E-01 | 4,96E-01 | Efl1     | 1,09 | No  |
| ENSMUSG00000038564 | 2,70E-02  | 4,06509154   | 9,45E-02 | 7,58E-01 | 9,36E-01 | lft172   | 1,02 | No  |
| ENSMUSG00000038567 | -1,90E+00 | -3,033647263 | 1,44E+00 | 2,30E-01 | 5,50E-01 | Cyp24a1  | 0,27 | No  |
| ENSMUSG00000038569 | 1,72E-01  | 2,468383641  | 1,73E+00 | 1,88E-01 | 5,50E-01 | Rad9b    | 1,13 | No  |
| ENSMUSG00000038570 | 4,17E-01  | -1,896146068 | 3,79E-01 | 5,38E-01 | 8,09E-01 | Saxo2    | 1,34 | No  |
| ENSMUSG00000038576 | 2,77E-01  | 3,988167549  | 9,47E+00 | 2,09E-03 | 2,90E-02 | Susd4    | 1,21 | Yes |
| ENSMUSG00000038578 | -1,61E-01 | 3,747399993  | 2,98E+00 | 8,44E-02 | 3,73E-01 | Susd1    | 0,89 | No  |
| ENSMUSG00000038582 | 4,60E-02  | 5,422530521  | 4,38E-01 | 5,08E-01 | 7,92E-01 | Pptc7    | 1,03 | No  |
| ENSMUSG00000038583 | -1,78E+00 | -1,497402194 | 9,04E+00 | 2,64E-03 | 3,47E-02 | Pln      | 0,29 | Yes |
| ENSMUSG00000038587 | -2,00E-01 | 0,053756179  | 5,11E-01 | 4,75E-01 | 7,63E-01 | Akap12   | 0,87 | No  |
| ENSMUSG00000038593 | 1,16E-02  | 7,327661041  | 3,80E-02 | 8,45E-01 | 9,87E-01 | Tctn1    | 1,01 | No  |
| ENSMUSG00000038594 | -5,56E-01 | 5,167867216  | 5,95E+01 | 1,19E-14 | 1,76E-12 | Cep85l   | 0,68 | Yes |
| ENSMUSG00000038598 | -9,12E-02 | -2,355552568 | 9,46E-03 | 9,23E-01 | 1,00E+00 | AI481877 | 0,94 | No  |
| ENSMUSG00000038599 | -8,78E-02 | -2,963255397 | 3,51E-03 | 9,53E-01 | 1,00E+00 | Capn8    | 0,94 | No  |
| ENSMUSG00000038600 | -1,27E+00 | -3,146104694 | 7,49E-01 | 3,87E-01 | 6,87E-01 | Atp6v0a4 | 0,42 | No  |

|                    |           |              |          |          |          |          |      |     |
|--------------------|-----------|--------------|----------|----------|----------|----------|------|-----|
| ENSMUSG00000038604 | 1,77E-01  | 5,6880446    | 6,82E+00 | 9,01E-03 | 8,65E-02 | Ripor1   | 1,13 | No  |
| ENSMUSG00000038605 | -2,48E-01 | 3,874266853  | 7,47E+00 | 6,28E-03 | 6,64E-02 | Samd10   | 0,84 | No  |
| ENSMUSG00000038607 | -6,57E-02 | 5,545666152  | 9,14E-01 | 3,39E-01 | 6,40E-01 | Gng10    | 0,96 | No  |
| ENSMUSG00000038608 | -5,21E-02 | 8,571185998  | 8,26E-01 | 3,63E-01 | 6,64E-01 | Dock10   | 0,96 | No  |
| ENSMUSG00000038611 | 7,81E-02  | 6,232489637  | 1,48E+00 | 2,23E-01 | 5,50E-01 | Phrf1    | 1,06 | No  |
| ENSMUSG00000038612 | -6,51E-02 | 9,460840242  | 1,33E+00 | 2,49E-01 | 5,50E-01 | Mcl1     | 0,96 | No  |
| ENSMUSG00000038615 | -6,69E-02 | 8,010975698  | 1,33E+00 | 2,50E-01 | 5,50E-01 | Nfe2l1   | 0,95 | No  |
| ENSMUSG00000038618 | 2,37E-01  | 2,642579497  | 3,72E+00 | 5,37E-02 | 2,83E-01 | Rassf7   | 1,18 | No  |
| ENSMUSG00000038619 | -1,26E-01 | 7,221124909  | 4,46E+00 | 3,47E-02 | 2,20E-01 | Ensa     | 0,92 | No  |
| ENSMUSG00000038622 | -1,63E-01 | 3,737868065  | 2,95E+00 | 8,58E-02 | 3,77E-01 | Med30    | 0,89 | No  |
| ENSMUSG00000038623 | 2,51E-01  | 7,417218572  | 1,77E+01 | 2,57E-05 | 7,71E-04 | Tm6sf1   | 1,19 | Yes |
| ENSMUSG00000038628 | 2,24E-02  | 4,784019048  | 8,53E-02 | 7,70E-01 | 9,42E-01 | Polr3k   | 1,02 | No  |
| ENSMUSG00000038630 | -1,89E+00 | -3,1076441   | 1,42E+00 | 2,33E-01 | 5,50E-01 | Zkscan16 | 0,27 | No  |
| ENSMUSG00000038633 | 9,02E-02  | 8,242164096  | 2,43E+00 | 1,19E-01 | 4,28E-01 | Degs1    | 1,06 | No  |
| ENSMUSG00000038637 | -1,57E-03 | 2,797946807  | 1,79E-04 | 9,89E-01 | 1,00E+00 | Lrrc56   | 1,00 | No  |
| ENSMUSG00000038642 | 1,52E-01  | 11,49664179  | 7,37E+00 | 6,62E-03 | 6,90E-02 | Ctss     | 1,11 | No  |
| ENSMUSG00000038644 | 9,83E-02  | 5,70001428   | 2,13E+00 | 1,45E-01 | 4,81E-01 | Pold1    | 1,07 | No  |
| ENSMUSG00000038646 | 1,27E-02  | 4,537508956  | 2,56E-02 | 8,73E-01 | 1,00E+00 | Fam103a1 | 1,01 | No  |
| ENSMUSG00000038648 | 1,43E-01  | 4,431768468  | 3,06E+00 | 8,03E-02 | 3,63E-01 | Creb3l2  | 1,10 | No  |
| ENSMUSG00000038650 | 1,49E-01  | 9,096773292  | 6,85E+00 | 8,85E-03 | 8,54E-02 | Rnh1     | 1,11 | No  |
| ENSMUSG00000038651 | 8,10E-01  | -1,424934318 | 2,26E+00 | 1,33E-01 | 4,59E-01 | Sycp2l   | 1,75 | No  |
| ENSMUSG00000038658 | -1,10E-01 | 7,381892313  | 3,42E+00 | 6,42E-02 | 3,17E-01 | Ric1     | 0,93 | No  |
| ENSMUSG00000038663 | -9,75E-01 | -0,668971269 | 5,73E+00 | 1,66E-02 | 1,34E-01 | Fsd2     | 0,51 | No  |
| ENSMUSG00000038664 | 7,66E-02  | 7,138812741  | 1,62E+00 | 2,04E-01 | 5,50E-01 | Herc1    | 1,05 | No  |
| ENSMUSG00000038665 | 3,53E-01  | -1,311216136 | 5,03E-01 | 4,78E-01 | 7,66E-01 | Dgki     | 1,28 | No  |
| ENSMUSG00000038668 | -2,10E-01 | 0,575246975  | 7,02E-01 | 4,02E-01 | 7,00E-01 | Lpar1    | 0,86 | No  |
| ENSMUSG00000038670 | 7,75E-02  | -1,963209535 | 1,32E-02 | 9,08E-01 | 1,00E+00 | Mybpc2   | 1,06 | No  |
| ENSMUSG00000038671 | -2,15E-01 | 4,695618565  | 7,82E+00 | 5,18E-03 | 5,74E-02 | Arfrp1   | 0,86 | No  |
| ENSMUSG00000038677 | 1,73E-01  | -1,627710526 | 8,36E-02 | 7,72E-01 | 9,43E-01 | Scube3   | 1,13 | No  |
| ENSMUSG00000038679 | 4,51E-02  | 5,774053792  | 4,52E-01 | 5,01E-01 | 7,86E-01 | Trps1    | 1,03 | No  |
| ENSMUSG00000038683 | 1,02E-01  | 5,462901228  | 2,15E+00 | 1,42E-01 | 4,77E-01 | Pak1ip1  | 1,07 | No  |
| ENSMUSG00000038685 | 1,23E-02  | 4,599246542  | 2,45E-02 | 8,76E-01 | 1,00E+00 | Rtel1    | 1,01 | No  |

|                    |           |              |          |          |          |         |      |     |
|--------------------|-----------|--------------|----------|----------|----------|---------|------|-----|
| ENSMUSG00000038690 | -2,30E-01 | 5,448158478  | 1,08E+01 | 9,90E-04 | 1,60E-02 | Atp5j2  | 0,85 | Yes |
| ENSMUSG00000038692 | 2,66E-01  | 1,51422376   | 2,43E+00 | 1,19E-01 | 4,29E-01 | Hoxb4   | 1,20 | No  |
| ENSMUSG00000038695 | -2,53E-02 | 4,547488021  | 1,01E-01 | 7,50E-01 | 9,31E-01 | Josd2   | 0,98 | No  |
| ENSMUSG00000038696 | -2,33E-01 | 5,990046813  | 1,27E+01 | 3,64E-04 | 7,08E-03 | Mapkap1 | 0,85 | Yes |
| ENSMUSG00000038697 | 9,66E-02  | 5,173410774  | 1,76E+00 | 1,84E-01 | 5,48E-01 | Taf5l   | 1,07 | No  |
| ENSMUSG00000038702 | 9,35E-02  | 3,448633296  | 8,60E-01 | 3,54E-01 | 6,55E-01 | Dsel    | 1,07 | No  |
| ENSMUSG00000038704 | -8,97E-01 | -2,832022722 | 4,41E-01 | 5,07E-01 | 7,91E-01 | Aspdh   | 0,54 | No  |
| ENSMUSG00000038705 | -2,53E-01 | 4,957383065  | 1,14E+01 | 7,33E-04 | 1,25E-02 | Gmeb2   | 0,84 | Yes |
| ENSMUSG00000038708 | 7,53E-02  | 7,060639204  | 1,55E+00 | 2,14E-01 | 5,50E-01 | Golga4  | 1,05 | No  |
| ENSMUSG00000038712 | -1,24E-02 | 6,542662881  | 3,92E-02 | 8,43E-01 | 9,85E-01 | Mindy1  | 0,99 | No  |
| ENSMUSG00000038717 | -1,12E-01 | 5,054053481  | 2,30E+00 | 1,29E-01 | 4,52E-01 | Atp5l   | 0,93 | No  |
| ENSMUSG00000038718 | 2,41E-02  | 3,8284661    | 6,92E-02 | 7,92E-01 | 9,55E-01 | Pbx3    | 1,02 | No  |
| ENSMUSG00000038721 | 1,78E+00  | -2,963287612 | 1,28E+00 | 2,58E-01 | 5,50E-01 | Hoxb7   | 3,44 | No  |
| ENSMUSG00000038722 | -2,52E-02 | 5,691740829  | 1,38E-01 | 7,10E-01 | 9,09E-01 | Bud31   | 0,98 | No  |
| ENSMUSG00000038725 | -2,65E+00 | -3,033633091 | 2,78E+00 | 9,55E-02 | 3,86E-01 | Pkhd1l1 | 0,16 | No  |
| ENSMUSG00000038729 | -8,04E-01 | 3,406311368  | 6,37E+01 | 1,41E-15 | 2,30E-13 | Akap2   | 0,57 | Yes |
| ENSMUSG00000038732 | 4,76E-01  | 3,563172367  | 2,30E+01 | 1,61E-06 | 6,74E-05 | Mboat1  | 1,39 | Yes |
| ENSMUSG00000038733 | 1,42E-03  | 8,197610126  | 6,03E-04 | 9,80E-01 | 1,00E+00 | Wdr26   | 1,00 | No  |
| ENSMUSG00000038736 | -1,64E-02 | 3,826000231  | 3,20E-02 | 8,58E-01 | 9,94E-01 | Nudcd1  | 0,99 | No  |
| ENSMUSG00000038738 | -1,45E-02 | 0,53005987   | 3,70E-03 | 9,52E-01 | 1,00E+00 | Shank1  | 0,99 | No  |
| ENSMUSG00000038740 | -5,50E-02 | 6,449722941  | 7,61E-01 | 3,83E-01 | 6,84E-01 | Mvb12b  | 0,96 | No  |
| ENSMUSG00000038742 | -3,24E-02 | 0,789117359  | 2,24E-02 | 8,81E-01 | 1,00E+00 | Angptl6 | 0,98 | No  |
| ENSMUSG00000038745 | -8,93E-01 | -2,770572856 | 4,35E-01 | 5,09E-01 | 7,93E-01 | Nlrp6   | 0,54 | No  |
| ENSMUSG00000038751 | -1,51E+00 | 3,008919547  | 1,80E+02 | 3,82E-41 | 4,77E-38 | Ptk6    | 0,35 | Yes |
| ENSMUSG00000038754 | -7,61E-01 | -2,548188001 | 6,50E-01 | 4,20E-01 | 7,15E-01 | Elovl3  | 0,59 | No  |
| ENSMUSG00000038759 | 1,85E-01  | 6,630133166  | 8,81E+00 | 2,99E-03 | 3,83E-02 | Nup205  | 1,14 | Yes |
| ENSMUSG00000038762 | 1,14E-01  | 6,570034316  | 3,32E+00 | 6,85E-02 | 3,29E-01 | Abcf1   | 1,08 | No  |
| ENSMUSG00000038763 | -2,85E-01 | -2,355592432 | 1,21E-01 | 7,28E-01 | 9,20E-01 | Alpk3   | 0,82 | No  |
| ENSMUSG00000038764 | -3,21E-01 | 4,610493536  | 1,68E+01 | 4,12E-05 | 1,15E-03 | Ptpn3   | 0,80 | Yes |
| ENSMUSG00000038765 | -1,34E+00 | -2,896122948 | 1,12E+00 | 2,89E-01 | 5,85E-01 | Lmx1b   | 0,39 | No  |
| ENSMUSG00000038766 | 1,19E-01  | 7,029706615  | 3,90E+00 | 4,84E-02 | 2,65E-01 | Gabpb2  | 1,09 | No  |
| ENSMUSG00000038770 | 3,62E-01  | -0,510135279 | 9,88E-01 | 3,20E-01 | 6,21E-01 | Kpna7   | 1,29 | No  |

|                    |           |              |          |          |          |               |      |     |
|--------------------|-----------|--------------|----------|----------|----------|---------------|------|-----|
| ENSMUSG00000038773 | -2,62E-02 | 7,06144414   | 1,89E-01 | 6,64E-01 | 8,84E-01 | Kdm3b         | 0,98 | No  |
| ENSMUSG00000038774 | 2,55E-02  | 5,806713841  | 1,46E-01 | 7,03E-01 | 9,06E-01 | Ascc3         | 1,02 | No  |
| ENSMUSG00000038775 | -9,52E-03 | 4,143868224  | 1,20E-02 | 9,13E-01 | 1,00E+00 | Vill          | 0,99 | No  |
| ENSMUSG00000038776 | 6,88E-02  | 6,564279486  | 1,21E+00 | 2,71E-01 | 5,67E-01 | Ephx1         | 1,05 | No  |
| ENSMUSG00000038777 | -1,75E+00 | -0,573866605 | 2,14E+01 | 3,75E-06 | 1,42E-04 | Sema6c        | 0,30 | Yes |
| ENSMUSG00000038780 | -8,20E-02 | 7,259501052  | 1,88E+00 | 1,70E-01 | 5,26E-01 | Smurf1        | 0,94 | No  |
| ENSMUSG00000038781 | -5,00E-01 | 4,727280857  | 4,29E+01 | 5,82E-11 | 5,72E-09 | Stap2         | 0,71 | Yes |
| ENSMUSG00000038782 | 1,92E-01  | 2,834002009  | 2,60E+00 | 1,07E-01 | 4,00E-01 | 1700028J19Rik | 1,14 | No  |
| ENSMUSG00000038784 | 1,81E-01  | 4,546676369  | 5,29E+00 | 2,14E-02 | 1,58E-01 | Cnot4         | 1,13 | No  |
| ENSMUSG00000038793 | 2,01E-01  | -0,180645486 | 3,67E-01 | 5,45E-01 | 8,13E-01 | Lefty1        | 1,15 | No  |
| ENSMUSG00000038797 | -3,30E-01 | 1,202948883  | 3,21E+00 | 7,32E-02 | 3,44E-01 | Zscan2        | 0,80 | No  |
| ENSMUSG00000038801 | 7,43E-01  | -2,963279568 | 3,02E-01 | 5,83E-01 | 8,38E-01 | Scgb1c1       | 1,67 | No  |
| ENSMUSG00000038803 | 6,07E-02  | 4,974354516  | 6,64E-01 | 4,15E-01 | 7,10E-01 | Ost4          | 1,04 | No  |
| ENSMUSG00000038805 | 1,81E+00  | -3,10765737  | 1,28E+00 | 2,58E-01 | 5,50E-01 | Six3          | 3,49 | No  |
| ENSMUSG00000038806 | -1,38E-02 | 5,508030951  | 3,94E-02 | 8,43E-01 | 9,85E-01 | Sde2          | 0,99 | No  |
| ENSMUSG00000038807 | -1,99E-02 | 2,621858612  | 2,53E-02 | 8,74E-01 | 1,00E+00 | Rap1gap2      | 0,99 | No  |
| ENSMUSG00000038811 | -3,49E-01 | 5,559608488  | 2,61E+01 | 3,22E-07 | 1,60E-05 | Gngt2         | 0,79 | Yes |
| ENSMUSG00000038812 | -1,87E-01 | 3,583616508  | 3,59E+00 | 5,83E-02 | 2,98E-01 | Trmt112       | 0,88 | No  |
| ENSMUSG00000038816 | 1,84E-01  | 1,221924279  | 9,18E-01 | 3,38E-01 | 6,38E-01 | Ctnnal1       | 1,14 | No  |
| ENSMUSG00000038822 | -4,92E-02 | 4,049762278  | 3,12E-01 | 5,76E-01 | 8,35E-01 | Hace1         | 0,97 | No  |
| ENSMUSG00000038827 | 1,06E-01  | 4,547441267  | 1,79E+00 | 1,81E-01 | 5,42E-01 | Fam206a       | 1,08 | No  |
| ENSMUSG00000038828 | 2,15E-01  | 6,309772346  | 1,14E+01 | 7,39E-04 | 1,26E-02 | Tmem214       | 1,16 | Yes |
| ENSMUSG00000038831 | -3,15E-02 | 2,363989541  | 5,46E-02 | 8,15E-01 | 9,69E-01 | Ralgps1       | 0,98 | No  |
| ENSMUSG00000038836 | -3,72E-02 | 0,432359725  | 2,32E-02 | 8,79E-01 | 1,00E+00 | Agbl3         | 0,97 | No  |
| ENSMUSG00000038838 | 2,00E-02  | 2,928508598  | 3,09E-02 | 8,60E-01 | 9,96E-01 | Vars2         | 1,01 | No  |
| ENSMUSG00000038843 | 1,13E-01  | 7,075075443  | 3,49E+00 | 6,16E-02 | 3,09E-01 | Gcnt1         | 1,08 | No  |
| ENSMUSG00000038844 | -3,96E-02 | 5,705485454  | 3,43E-01 | 5,58E-01 | 8,22E-01 | Kif16b        | 0,97 | No  |
| ENSMUSG00000038845 | 1,61E-01  | 4,305633544  | 3,71E+00 | 5,42E-02 | 2,85E-01 | Phb           | 1,12 | No  |
| ENSMUSG00000038848 | 4,51E-02  | 6,003517696  | 4,75E-01 | 4,91E-01 | 7,77E-01 | Ythdf1        | 1,03 | No  |
| ENSMUSG00000038855 | -1,30E-01 | 6,621703672  | 4,40E+00 | 3,59E-02 | 2,25E-01 | Itpkb         | 0,91 | No  |
| ENSMUSG00000038859 | 1,54E-01  | -0,060836503 | 2,59E-01 | 6,11E-01 | 8,52E-01 | Baiap211      | 1,11 | No  |
| ENSMUSG00000038860 | -9,08E-02 | 1,419350547  | 2,59E-01 | 6,11E-01 | 8,52E-01 | Garnl3        | 0,94 | No  |

|                    |           |              |          |          |          |               |      |     |
|--------------------|-----------|--------------|----------|----------|----------|---------------|------|-----|
| ENSMUSG00000038861 | 6,48E-02  | 5,850938673  | 9,58E-01 | 3,28E-01 | 6,29E-01 | Pi4kb         | 1,05 | No  |
| ENSMUSG00000038866 | -2,92E-02 | 5,964069135  | 1,97E-01 | 6,57E-01 | 8,80E-01 | Zcchc2        | 0,98 | No  |
| ENSMUSG00000038871 | 5,19E-02  | 3,510883811  | 2,72E-01 | 6,02E-01 | 8,48E-01 | Bpgm          | 1,04 | No  |
| ENSMUSG00000038872 | 6,44E-02  | 5,453567003  | 8,38E-01 | 3,60E-01 | 6,61E-01 | Zfhx3         | 1,05 | No  |
| ENSMUSG00000038876 | -8,91E-02 | 5,166205472  | 1,54E+00 | 2,15E-01 | 5,50E-01 | Rnf146        | 0,94 | No  |
| ENSMUSG00000038880 | -1,62E-01 | 4,097657563  | 3,49E+00 | 6,18E-02 | 3,09E-01 | Mrps34        | 0,89 | No  |
| ENSMUSG00000038884 | 1,32E-01  | 2,41422841   | 1,01E+00 | 3,16E-01 | 6,16E-01 | A230050P20Rik | 1,10 | No  |
| ENSMUSG00000038886 | 2,61E-01  | 7,655605706  | 1,95E+01 | 1,02E-05 | 3,43E-04 | Man2a2        | 1,20 | Yes |
| ENSMUSG00000038888 | 1,07E-01  | 3,055136476  | 9,57E-01 | 3,28E-01 | 6,29E-01 | Ctu1          | 1,08 | No  |
| ENSMUSG00000038893 | -6,67E-02 | 3,018206494  | 3,51E-01 | 5,54E-01 | 8,19E-01 | Fam117a       | 0,95 | No  |
| ENSMUSG00000038894 | 3,60E-01  | 6,35184874   | 3,22E+01 | 1,40E-08 | 9,38E-07 | Irs2          | 1,28 | Yes |
| ENSMUSG00000038895 | 9,00E-03  | 3,460715683  | 8,10E-03 | 9,28E-01 | 1,00E+00 | Zfp653        | 1,01 | No  |
| ENSMUSG00000038900 | -5,77E-02 | 4,171064604  | 4,41E-01 | 5,07E-01 | 7,91E-01 | Rpl12         | 0,96 | No  |
| ENSMUSG00000038902 | 2,70E-02  | 5,021920915  | 1,35E-01 | 7,13E-01 | 9,11E-01 | Pogz          | 1,02 | No  |
| ENSMUSG00000038909 | 6,15E-03  | 6,660866324  | 9,82E-03 | 9,21E-01 | 1,00E+00 | Kat7          | 1,00 | No  |
| ENSMUSG00000038910 | -3,26E-01 | 6,401136875  | 2,66E+01 | 2,44E-07 | 1,26E-05 | Plcl2         | 0,80 | Yes |
| ENSMUSG00000038914 | 1,29E-01  | 6,284295323  | 4,12E+00 | 4,23E-02 | 2,45E-01 | Dido1         | 1,09 | No  |
| ENSMUSG00000038917 | 8,07E-01  | -1,770669779 | 1,81E+00 | 1,78E-01 | 5,39E-01 | 3930402G23Rik | 1,75 | No  |
| ENSMUSG00000038930 | 1,31E-01  | 4,093986094  | 2,30E+00 | 1,30E-01 | 4,52E-01 | Rccd1         | 1,10 | No  |
| ENSMUSG00000038932 | -1,27E+00 | -3,070178353 | 7,36E-01 | 3,91E-01 | 6,91E-01 | Tcfl5         | 0,42 | No  |
| ENSMUSG00000038936 | -1,03E-01 | 3,624585112  | 1,17E+00 | 2,80E-01 | 5,76E-01 | Sccpdh        | 0,93 | No  |
| ENSMUSG00000038943 | 2,45E-01  | 5,820799014  | 1,36E+01 | 2,30E-04 | 4,88E-03 | Prc1          | 1,19 | Yes |
| ENSMUSG00000038949 | -4,96E-02 | 4,884510802  | 4,39E-01 | 5,07E-01 | 7,92E-01 | Cnst          | 0,97 | No  |
| ENSMUSG00000038954 | -3,02E-01 | 2,021995483  | 3,95E+00 | 4,68E-02 | 2,59E-01 | Supt3         | 0,81 | No  |
| ENSMUSG00000038957 | 2,75E-02  | 5,573418109  | 1,64E-01 | 6,86E-01 | 8,97E-01 | Ecd3          | 1,02 | No  |
| ENSMUSG00000038963 | -2,83E-01 | 3,915644415  | 9,75E+00 | 1,79E-03 | 2,56E-02 | Slco4a1       | 0,82 | Yes |
| ENSMUSG00000038965 | -1,93E-02 | 6,971858428  | 1,01E-01 | 7,51E-01 | 9,32E-01 | Ube2l3        | 0,99 | No  |
| ENSMUSG00000038967 | -7,07E-03 | 3,410863079  | 4,77E-03 | 9,45E-01 | 1,00E+00 | Pdk2          | 1,00 | No  |
| ENSMUSG00000038968 | 1,17E-01  | -2,070229147 | 2,69E-02 | 8,70E-01 | 1,00E+00 | Klk1b16       | 1,08 | No  |
| ENSMUSG00000038970 | 1,27E-02  | 5,847883155  | 3,63E-02 | 8,49E-01 | 9,88E-01 | Lmtk2         | 1,01 | No  |
| ENSMUSG00000038973 | 5,25E-01  | 0,193946532  | 3,88E+00 | 4,89E-02 | 2,66E-01 | Cldnd2        | 1,44 | No  |
| ENSMUSG00000038975 | 4,16E-02  | 4,913948116  | 3,06E-01 | 5,80E-01 | 8,37E-01 | Rabggtb       | 1,03 | No  |



|                    |           |              |          |          |          |            |      |     |
|--------------------|-----------|--------------|----------|----------|----------|------------|------|-----|
| ENSMUSG00000038976 | 1,39E-01  | 7,935745427  | 5,66E+00 | 1,73E-02 | 1,37E-01 | Ppp1r9b    | 1,10 | No  |
| ENSMUSG00000038982 | 2,32E-01  | 3,860578767  | 6,41E+00 | 1,14E-02 | 1,03E-01 | Bloc1s5    | 1,17 | No  |
| ENSMUSG00000038984 | 1,65E-01  | -2,311218732 | 4,09E-02 | 8,40E-01 | 9,83E-01 | Tspyl5     | 1,12 | No  |
| ENSMUSG00000038987 | 2,20E-01  | 2,139403236  | 2,29E+00 | 1,30E-01 | 4,52E-01 | Cfap157    | 1,16 | No  |
| ENSMUSG00000038990 | -1,51E-02 | 4,870073035  | 4,00E-02 | 8,42E-01 | 9,84E-01 | Cables2    | 0,99 | No  |
| ENSMUSG00000038991 | 5,38E-02  | 6,623476287  | 7,47E-01 | 3,87E-01 | 6,87E-01 | Txndc5     | 1,04 | No  |
| ENSMUSG00000038997 | 2,31E+00  | -3,070182045 | 2,04E+00 | 1,53E-01 | 4,96E-01 | Asb17      | 4,95 | No  |
| ENSMUSG00000039000 | 8,59E-02  | 5,624832735  | 1,58E+00 | 2,08E-01 | 5,50E-01 | Ube3c      | 1,06 | No  |
| ENSMUSG00000039001 | -9,82E-02 | 0,763300101  | 1,87E-01 | 6,65E-01 | 8,85E-01 | Rps21      | 0,93 | No  |
| ENSMUSG00000039004 | -1,51E-01 | -2,05176781  | 4,37E-02 | 8,34E-01 | 9,79E-01 | Bmp6       | 0,90 | No  |
| ENSMUSG00000039005 | 1,09E-01  | 7,665022352  | 3,44E+00 | 6,38E-02 | 3,16E-01 | Tlr4       | 1,08 | No  |
| ENSMUSG00000039007 | 1,93E-01  | 4,333997558  | 5,30E+00 | 2,13E-02 | 1,57E-01 | Cpq        | 1,14 | No  |
| ENSMUSG00000039013 | 2,86E-01  | 5,650342589  | 1,75E+01 | 2,92E-05 | 8,56E-04 | Siglecf    | 1,22 | Yes |
| ENSMUSG00000039016 | -3,46E-02 | 4,887352889  | 2,10E-01 | 6,47E-01 | 8,74E-01 | Timm8b     | 0,98 | No  |
| ENSMUSG00000039018 | 6,16E-02  | 2,826821726  | 2,74E-01 | 6,01E-01 | 8,47E-01 | Mtg1       | 1,04 | No  |
| ENSMUSG00000039021 | 3,61E-02  | 1,864397618  | 5,32E-02 | 8,18E-01 | 9,70E-01 | Ttc16      | 1,03 | No  |
| ENSMUSG00000039031 | 1,38E-01  | 5,633691802  | 4,13E+00 | 4,21E-02 | 2,44E-01 | Arhgap18   | 1,10 | No  |
| ENSMUSG00000039032 | 1,85E+00  | -3,107657832 | 1,35E+00 | 2,46E-01 | 5,50E-01 | Tsga13     | 3,61 | No  |
| ENSMUSG00000039033 | 2,19E-01  | 2,06068579   | 2,09E+00 | 1,49E-01 | 4,89E-01 | Tasp1      | 1,16 | No  |
| ENSMUSG00000039037 | 1,81E-02  | -1,91261285  | 6,65E-04 | 9,79E-01 | 1,00E+00 | St6galnac5 | 1,01 | No  |
| ENSMUSG00000039041 | 1,22E-02  | 4,981873983  | 2,67E-02 | 8,70E-01 | 1,00E+00 | Adrm1      | 1,01 | No  |
| ENSMUSG00000039043 | -4,47E-01 | 4,58008702   | 3,32E+01 | 8,25E-09 | 5,82E-07 | Arpin      | 0,73 | Yes |
| ENSMUSG00000039046 | -1,32E-02 | 5,009791115  | 3,15E-02 | 8,59E-01 | 9,95E-01 | Usp6nl     | 0,99 | No  |
| ENSMUSG00000039047 | 9,67E-02  | 5,756192431  | 2,07E+00 | 1,50E-01 | 4,91E-01 | Pigk       | 1,07 | No  |
| ENSMUSG00000039048 | -5,56E-02 | 4,867220974  | 5,44E-01 | 4,61E-01 | 7,50E-01 | Foxred1    | 0,96 | No  |
| ENSMUSG00000039050 | -9,95E-03 | 4,932273698  | 1,80E-02 | 8,93E-01 | 1,00E+00 | Osbp12     | 0,99 | No  |
| ENSMUSG00000039055 | 1,64E-01  | 4,178794318  | 3,68E+00 | 5,52E-02 | 2,88E-01 | Eme1       | 1,12 | No  |
| ENSMUSG00000039057 | 2,94E-01  | -2,600644909 | 8,78E-02 | 7,67E-01 | 9,40E-01 | Myo16      | 1,23 | No  |
| ENSMUSG00000039058 | 8,15E-01  | -2,333251082 | 6,88E-01 | 4,07E-01 | 7,03E-01 | Ak5        | 1,76 | No  |
| ENSMUSG00000039059 | -1,89E+00 | -3,1076441   | 1,42E+00 | 2,33E-01 | 5,50E-01 | Hrh3       | 0,27 | No  |
| ENSMUSG00000039062 | 1,78E-01  | 9,230593184  | 9,80E+00 | 1,74E-03 | 2,51E-02 | Anpep      | 1,13 | Yes |
| ENSMUSG00000039063 | 2,19E-01  | 0,609783129  | 9,51E-01 | 3,30E-01 | 6,30E-01 | Echdc3     | 1,16 | No  |

|                    |           |              |          |          |          |               |      |     |
|--------------------|-----------|--------------|----------|----------|----------|---------------|------|-----|
| ENSMUSG00000039065 | -3,28E-02 | 4,021587471  | 1,43E-01 | 7,06E-01 | 9,07E-01 | Fam173b       | 0,98 | No  |
| ENSMUSG00000039067 | 4,54E-02  | 5,95920908   | 4,78E-01 | 4,89E-01 | 7,76E-01 | Psmc7         | 1,03 | No  |
| ENSMUSG00000039068 | 6,86E-02  | 5,73236282   | 1,04E+00 | 3,07E-01 | 6,05E-01 | Zzz3          | 1,05 | No  |
| ENSMUSG00000039069 | 1,48E-01  | 3,233659233  | 2,04E+00 | 1,53E-01 | 4,96E-01 | Mtg2          | 1,11 | No  |
| ENSMUSG00000039079 | -1,87E+00 | -3,107637761 | 1,39E+00 | 2,38E-01 | 5,50E-01 | Trhr2         | 0,27 | No  |
| ENSMUSG00000039081 | 9,18E-02  | 1,986320817  | 3,76E-01 | 5,40E-01 | 8,10E-01 | Zfp503        | 1,07 | No  |
| ENSMUSG00000039084 | 4,69E-01  | -2,355624058 | 2,98E-01 | 5,85E-01 | 8,39E-01 | Chad          | 1,38 | No  |
| ENSMUSG00000039086 | -1,53E-01 | 3,898655201  | 2,97E+00 | 8,51E-02 | 3,74E-01 | Ss18l1        | 0,90 | No  |
| ENSMUSG00000039087 | 2,59E-01  | 6,639541472  | 1,73E+01 | 3,27E-05 | 9,46E-04 | Rreb1         | 1,20 | Yes |
| ENSMUSG00000039089 | 1,96E-02  | 3,198921369  | 3,39E-02 | 8,54E-01 | 9,92E-01 | L3mbtl3       | 1,01 | No  |
| ENSMUSG00000039095 | -9,94E-01 | 2,116608024  | 4,99E+01 | 1,62E-12 | 1,93E-10 | En2           | 0,50 | Yes |
| ENSMUSG00000039096 | -9,15E-02 | 2,761009119  | 5,83E-01 | 4,45E-01 | 7,36E-01 | Rsad1         | 0,94 | No  |
| ENSMUSG00000039097 | -2,43E-01 | -2,03362573  | 1,16E-01 | 7,33E-01 | 9,23E-01 | Rln1          | 0,85 | No  |
| ENSMUSG00000039099 | -1,89E+00 | -3,033648118 | 1,42E+00 | 2,33E-01 | 5,50E-01 | Wdr93         | 0,27 | No  |
| ENSMUSG00000039100 | 5,09E-02  | 6,695076084  | 6,78E-01 | 4,10E-01 | 7,07E-01 | March6        | 1,04 | No  |
| ENSMUSG00000039103 | -4,73E-01 | -1,548075893 | 7,77E-01 | 3,78E-01 | 6,79E-01 | Nexn          | 0,72 | No  |
| ENSMUSG00000039105 | -3,39E-02 | 6,826320037  | 3,06E-01 | 5,80E-01 | 8,37E-01 | Atp6v1g1      | 0,98 | No  |
| ENSMUSG00000039108 | 2,09E-02  | 4,882093048  | 7,82E-02 | 7,80E-01 | 9,48E-01 | Lsm14b        | 1,01 | No  |
| ENSMUSG00000039109 | 1,47E+00  | 4,621194849  | 2,84E+02 | 8,00E-64 | 5,99E-60 | F13a1         | 2,77 | Yes |
| ENSMUSG00000039110 | 6,12E-01  | -0,770643077 | 2,42E+00 | 1,20E-01 | 4,30E-01 | Mycbpap       | 1,53 | No  |
| ENSMUSG00000039114 | -1,00E-01 | -0,929286145 | 5,67E-02 | 8,12E-01 | 9,67E-01 | Nrn1          | 0,93 | No  |
| ENSMUSG00000039115 | -7,87E-01 | -1,929241623 | 1,26E+00 | 2,61E-01 | 5,54E-01 | Itga9         | 0,58 | No  |
| ENSMUSG00000039116 | -7,09E-01 | 6,449020421  | 1,27E+02 | 1,65E-29 | 8,99E-27 | Adgrg6        | 0,61 | Yes |
| ENSMUSG00000039117 | 9,98E-02  | 5,410539752  | 2,05E+00 | 1,53E-01 | 4,95E-01 | Taf4          | 1,07 | No  |
| ENSMUSG00000039126 | 3,58E-01  | 6,902282879  | 3,40E+01 | 5,63E-09 | 4,11E-07 | Prune2        | 1,28 | Yes |
| ENSMUSG00000039128 | 1,01E-02  | 5,070182535  | 1,90E-02 | 8,90E-01 | 1,00E+00 | Cdc123        | 1,01 | No  |
| ENSMUSG00000039130 | -1,60E-01 | 4,686133974  | 4,12E+00 | 4,24E-02 | 2,45E-01 | Zc3hc1        | 0,90 | No  |
| ENSMUSG00000039131 | 2,02E+00  | -1,71175682  | 7,10E+00 | 7,70E-03 | 7,68E-02 | Gipc2         | 4,05 | No  |
| ENSMUSG00000039133 | 5,45E-01  | -2,015684773 | 6,24E-01 | 4,29E-01 | 7,23E-01 | 9330171B17Rik | 1,46 | No  |
| ENSMUSG00000039137 | -6,95E-01 | 2,500184007  | 2,81E+01 | 1,16E-07 | 6,34E-06 | Whrn          | 0,62 | Yes |
| ENSMUSG00000039145 | 2,94E-01  | 5,841223518  | 1,93E+01 | 1,10E-05 | 3,66E-04 | Camk1d        | 1,23 | Yes |
| ENSMUSG00000039148 | -3,05E-02 | 5,865962506  | 2,11E-01 | 6,46E-01 | 8,74E-01 | Sart1         | 0,98 | No  |

|                    |           |              |           |          |          |               |      |     |
|--------------------|-----------|--------------|-----------|----------|----------|---------------|------|-----|
| ENSMUSG00000039153 | -7,72E-02 | 5,827550742  | 1,32E+00  | 2,51E-01 | 5,50E-01 | Runx2         | 0,95 | No  |
| ENSMUSG00000039154 | -7,80E-01 | -1,57400692  | 1,80E+00  | 1,80E-01 | 5,42E-01 | Shd           | 0,58 | No  |
| ENSMUSG00000039155 | -1,02E+00 | -2,146135971 | 1,97E+00  | 1,61E-01 | 5,09E-01 | Cdh26         | 0,49 | No  |
| ENSMUSG00000039156 | 1,67E-02  | 5,329912396  | 5,65E-02  | 8,12E-01 | 9,67E-01 | Stim2         | 1,01 | No  |
| ENSMUSG00000039157 | -5,11E-02 | 4,159764433  | 3,63E-01  | 5,47E-01 | 8,14E-01 | Fam102a       | 0,97 | No  |
| ENSMUSG00000039158 | 2,72E-02  | 7,359425979  | 2,09E-01  | 6,47E-01 | 8,75E-01 | Akna          | 1,02 | No  |
| ENSMUSG00000039159 | 3,19E-03  | 5,756377333  | 2,27E-03  | 9,62E-01 | 1,00E+00 | Ube2h         | 1,00 | No  |
| ENSMUSG00000039163 | -1,28E-01 | 3,991673082  | 2,06E+00  | 1,51E-01 | 4,93E-01 | Cmc1          | 0,92 | No  |
| ENSMUSG00000039164 | 1,68E-01  | 3,489339398  | 2,85E+00  | 9,13E-02 | 3,82E-01 | Naif1         | 1,12 | No  |
| ENSMUSG00000039166 | 5,13E-02  | 3,396696664  | 2,52E-01  | 6,16E-01 | 8,54E-01 | Akap7         | 1,04 | No  |
| ENSMUSG00000039167 | -3,16E+00 | -2,963246013 | 4,20E+00  | 4,04E-02 | 2,38E-01 | Adgrl4        | 0,11 | No  |
| ENSMUSG00000039168 | -1,39E-01 | 7,42988569   | 5,50E+00  | 1,90E-02 | 1,46E-01 | Dap           | 0,91 | No  |
| ENSMUSG00000039176 | 3,69E-01  | 5,592421272  | 2,87E+01  | 8,27E-08 | 4,70E-06 | Polg          | 1,29 | Yes |
| ENSMUSG00000039178 | -1,84E-01 | 2,478766247  | 2,06E+00  | 1,52E-01 | 4,94E-01 | Tbc1d19       | 0,88 | No  |
| ENSMUSG00000039179 | -1,27E+00 | -2,548213249 | 1,55E+00  | 2,12E-01 | 5,50E-01 | Tekt5         | 0,41 | No  |
| ENSMUSG00000039182 | 1,33E-01  | 2,699438814  | 1,19E+00  | 2,76E-01 | 5,73E-01 | AW209491      | 1,10 | No  |
| ENSMUSG00000039183 | 5,80E-02  | 6,045964267  | 7,95E-01  | 3,73E-01 | 6,74E-01 | Nubp2         | 1,04 | No  |
| ENSMUSG00000039187 | 2,90E-01  | 3,717643008  | 9,23E+00  | 2,37E-03 | 3,21E-02 | Fanci         | 1,22 | Yes |
| ENSMUSG00000039191 | -1,50E-01 | 8,634965896  | 6,83E+00  | 8,95E-03 | 8,60E-02 | Rbpj          | 0,90 | No  |
| ENSMUSG00000039193 | 2,24E-01  | 4,144888845  | 6,78E+00  | 9,21E-03 | 8,78E-02 | Nlrc4         | 1,17 | No  |
| ENSMUSG00000039194 | -8,30E-01 | -2,896162806 | 3,77E-01  | 5,39E-01 | 8,09E-01 | Rlbp1         | 0,56 | No  |
| ENSMUSG00000039195 | 9,98E-02  | 5,039958476  | 1,83E+00  | 1,76E-01 | 5,35E-01 | 1110008P14Rik | 1,07 | No  |
| ENSMUSG00000039196 | -7,47E-02 | 0,010808198  | 6,55E-02  | 7,98E-01 | 9,59E-01 | Orm1          | 0,95 | No  |
| ENSMUSG00000039197 | 2,55E-01  | 4,471779076  | 9,73E+00  | 1,81E-03 | 2,58E-02 | Adk           | 1,19 | Yes |
| ENSMUSG00000039198 | 9,01E-03  | -3,107646452 | -5,16E-10 | 1,00E+00 | 1,00E+00 | Ptchd3        | 1,01 | No  |
| ENSMUSG00000039199 | 3,04E-01  | 4,675494175  | 1,51E+01  | 1,02E-04 | 2,47E-03 | Zdhhc1        | 1,23 | Yes |
| ENSMUSG00000039200 | -8,70E-01 | -1,963285748 | 1,36E+00  | 2,44E-01 | 5,50E-01 | Atf7ip2       | 0,55 | No  |
| ENSMUSG00000039202 | -9,22E-02 | 6,523520819  | 2,16E+00  | 1,41E-01 | 4,75E-01 | Abhd2         | 0,94 | No  |
| ENSMUSG00000039205 | 1,29E-01  | 6,097977349  | 3,97E+00  | 4,62E-02 | 2,57E-01 | Ciz1          | 1,09 | No  |
| ENSMUSG00000039206 | 2,48E-01  | 7,200239537  | 1,70E+01  | 3,66E-05 | 1,04E-03 | Daglb         | 1,19 | Yes |
| ENSMUSG00000039208 | 5,87E-03  | 6,386956082  | 8,58E-03  | 9,26E-01 | 1,00E+00 | Metrn1        | 1,00 | No  |
| ENSMUSG00000039209 | -4,11E-01 | -0,711682629 | 1,19E+00  | 2,75E-01 | 5,71E-01 | Rpl39l        | 0,75 | No  |

|                    |           |              |          |          |          |               |      |     |
|--------------------|-----------|--------------|----------|----------|----------|---------------|------|-----|
| ENSMUSG00000039210 | 6,33E-02  | 4,156111796  | 5,45E-01 | 4,60E-01 | 7,49E-01 | Gpatch2       | 1,04 | No  |
| ENSMUSG00000039217 | 1,51E-01  | 2,150988885  | 1,02E+00 | 3,12E-01 | 6,12E-01 | Il18          | 1,11 | No  |
| ENSMUSG00000039218 | -7,42E-02 | 9,57714487   | 1,73E+00 | 1,89E-01 | 5,50E-01 | Srrm2         | 0,95 | No  |
| ENSMUSG00000039219 | -4,98E-02 | 5,583309045  | 5,29E-01 | 4,67E-01 | 7,55E-01 | Arid4b        | 0,97 | No  |
| ENSMUSG00000039220 | 2,08E-01  | 6,134800143  | 1,04E+01 | 1,26E-03 | 1,95E-02 | Ppp1r10       | 1,16 | Yes |
| ENSMUSG00000039221 | -1,08E-01 | 3,573438512  | 1,24E+00 | 2,66E-01 | 5,61E-01 | Rpl22l1       | 0,93 | No  |
| ENSMUSG00000039224 | 1,86E-02  | 1,117832414  | 8,40E-03 | 9,27E-01 | 1,00E+00 | D1Pas1        | 1,01 | No  |
| ENSMUSG00000039230 | -8,80E-02 | 5,431552677  | 1,58E+00 | 2,08E-01 | 5,50E-01 | Tbcd          | 0,94 | No  |
| ENSMUSG00000039232 | -6,06E-01 | 4,454892118  | 5,84E+01 | 2,14E-14 | 3,09E-12 | Stx11         | 0,66 | Yes |
| ENSMUSG00000039233 | -2,92E-02 | 4,743961646  | 1,44E-01 | 7,05E-01 | 9,07E-01 | Tbce          | 0,98 | No  |
| ENSMUSG00000039234 | 2,22E-01  | 5,295806196  | 9,71E+00 | 1,83E-03 | 2,61E-02 | Sec24d        | 1,17 | Yes |
| ENSMUSG00000039236 | -1,04E-02 | 0,85410249   | 2,20E-03 | 9,63E-01 | 1,00E+00 | Isg20         | 0,99 | No  |
| ENSMUSG00000039238 | 4,94E-01  | 0,94353533   | 5,73E+00 | 1,67E-02 | 1,35E-01 | Zfp750        | 1,41 | No  |
| ENSMUSG00000039239 | -9,76E-01 | -1,205792236 | 4,52E+00 | 3,34E-02 | 2,14E-01 | Tgfb2         | 0,51 | No  |
| ENSMUSG00000039242 | 1,93E-01  | 4,252096482  | 5,26E+00 | 2,18E-02 | 1,59E-01 | B3galnt2      | 1,14 | No  |
| ENSMUSG00000039244 | 1,07E-01  | 5,338467676  | 2,27E+00 | 1,32E-01 | 4,57E-01 | E130309D02Rik | 1,08 | No  |
| ENSMUSG00000039246 | 8,01E-03  | 0,062417923  | 8,17E-04 | 9,77E-01 | 1,00E+00 | Lyplal1       | 1,01 | No  |
| ENSMUSG00000039253 | 6,73E-02  | 2,071283412  | 2,22E-01 | 6,37E-01 | 8,68E-01 | Fn3krp        | 1,05 | No  |
| ENSMUSG00000039254 | 1,07E-01  | 3,727492845  | 1,31E+00 | 2,53E-01 | 5,50E-01 | Pomt1         | 1,08 | No  |
| ENSMUSG00000039262 | -2,28E-02 | 7,328323173  | 1,47E-01 | 7,02E-01 | 9,05E-01 | Prrc2b        | 0,98 | No  |
| ENSMUSG00000039263 | 1,19E-02  | 5,994870746  | 3,32E-02 | 8,55E-01 | 9,92E-01 | Npepl1        | 1,01 | No  |
| ENSMUSG00000039264 | -9,92E-01 | -2,311121469 | 1,19E+00 | 2,75E-01 | 5,71E-01 | Gimap3        | 0,50 | No  |
| ENSMUSG00000039270 | 1,51E-01  | 4,64184674   | 3,67E+00 | 5,55E-02 | 2,89E-01 | Megf9         | 1,11 | No  |
| ENSMUSG00000039275 | 1,52E-01  | 6,254679765  | 5,68E+00 | 1,72E-02 | 1,37E-01 | Foxk2         | 1,11 | No  |
| ENSMUSG00000039285 | -9,42E-03 | 5,663640208  | 1,93E-02 | 8,90E-01 | 1,00E+00 | Azi2          | 0,99 | No  |
| ENSMUSG00000039286 | 1,11E-01  | 6,108581419  | 2,94E+00 | 8,62E-02 | 3,78E-01 | Fndc3b        | 1,08 | No  |
| ENSMUSG00000039294 | 1,72E-01  | 6,160902156  | 7,11E+00 | 7,65E-03 | 7,65E-02 | BC017643      | 1,13 | No  |
| ENSMUSG00000039298 | 3,64E-02  | 5,644526045  | 2,88E-01 | 5,91E-01 | 8,42E-01 | Cdk5rap2      | 1,03 | No  |
| ENSMUSG00000039304 | 1,16E-01  | 0,924664229  | 3,24E-01 | 5,69E-01 | 8,30E-01 | Tnfsf10       | 1,08 | No  |
| ENSMUSG00000039307 | 4,15E-02  | 2,906445317  | 1,30E-01 | 7,18E-01 | 9,15E-01 | Hexdc         | 1,03 | No  |
| ENSMUSG00000039308 | 1,72E-01  | 6,494424078  | 7,52E+00 | 6,09E-03 | 6,49E-02 | Ndst2         | 1,13 | No  |
| ENSMUSG00000039313 | -1,52E-02 | -2,831963104 | 1,73E-04 | 9,90E-01 | 1,00E+00 | AF529169      | 0,99 | No  |

|                    |           |              |           |          |          |               |      |     |
|--------------------|-----------|--------------|-----------|----------|----------|---------------|------|-----|
| ENSMUSG00000039315 | 1,22E+00  | -2,655136616 | 9,22E-01  | 3,37E-01 | 6,38E-01 | Clnk          | 2,33 | No  |
| ENSMUSG00000039316 | -5,66E-02 | 7,67933683   | 9,28E-01  | 3,35E-01 | 6,36E-01 | Rftn1         | 0,96 | No  |
| ENSMUSG00000039318 | 8,22E-02  | 6,203565416  | 1,64E+00  | 2,01E-01 | 5,50E-01 | Rab3gap2      | 1,06 | No  |
| ENSMUSG00000039328 | 4,24E-02  | 1,179411335  | 4,68E-02  | 8,29E-01 | 9,76E-01 | Rnf122        | 1,03 | No  |
| ENSMUSG00000039330 | -1,36E+00 | -2,896122487 | 1,16E+00  | 2,81E-01 | 5,78E-01 | Tsga10ip      | 0,39 | No  |
| ENSMUSG00000039339 | 2,67E+00  | -3,033636951 | 2,76E+00  | 9,68E-02 | 3,88E-01 | Mfsd4b2       | 6,36 | No  |
| ENSMUSG00000039342 | 3,57E-03  | -3,165745957 | -2,99E-11 | 1,00E+00 | 1,00E+00 | Ankar         | 1,00 | No  |
| ENSMUSG00000039345 | 2,36E-01  | 1,763304811  | 2,15E+00  | 1,43E-01 | 4,77E-01 | Mettl22       | 1,18 | No  |
| ENSMUSG00000039347 | 1,89E-02  | -1,088715476 | 1,54E-03  | 9,69E-01 | 1,00E+00 | Atp6v0e2      | 1,01 | No  |
| ENSMUSG00000039349 | 3,16E+00  | -2,83198773  | 4,06E+00  | 4,38E-02 | 2,49E-01 | C130074G19Rik | 8,92 | No  |
| ENSMUSG00000039354 | 6,91E-02  | 4,764505023  | 8,25E-01  | 3,64E-01 | 6,65E-01 | Smarcal1      | 1,05 | No  |
| ENSMUSG00000039356 | 1,16E-01  | 3,672089489  | 1,48E+00  | 2,24E-01 | 5,50E-01 | Exosc2        | 1,08 | No  |
| ENSMUSG00000039357 | -8,82E-03 | 4,600048969  | 1,24E-02  | 9,11E-01 | 1,00E+00 | Fut11         | 0,99 | No  |
| ENSMUSG00000039361 | 7,60E-02  | 9,240529848  | 1,80E+00  | 1,80E-01 | 5,42E-01 | Picalm        | 1,05 | No  |
| ENSMUSG00000039364 | -2,68E+00 | -3,033645766 | 2,84E+00  | 9,17E-02 | 3,82E-01 | Sectm1b       | 0,16 | No  |
| ENSMUSG00000039367 | -3,83E-02 | 7,386819831  | 4,15E-01  | 5,20E-01 | 7,99E-01 | Sec24c        | 0,97 | No  |
| ENSMUSG00000039372 | -1,49E+00 | -2,497585539 | 2,31E+00  | 1,29E-01 | 4,50E-01 | March4        | 0,35 | No  |
| ENSMUSG00000039375 | 1,21E-02  | -3,033650469 | 7,34E-11  | 1,00E+00 | 1,00E+00 | Wdr17         | 1,01 | No  |
| ENSMUSG00000039376 | -2,89E-01 | -1,472955942 | 2,74E-01  | 6,01E-01 | 8,47E-01 | Synpo2l       | 0,82 | No  |
| ENSMUSG00000039377 | -1,82E-01 | 7,027192087  | 8,86E+00  | 2,91E-03 | 3,74E-02 | Hlx           | 0,88 | Yes |
| ENSMUSG00000039384 | -8,53E-02 | 2,163731289  | 3,41E-01  | 5,59E-01 | 8,22E-01 | Dusp10        | 0,94 | No  |
| ENSMUSG00000039385 | 1,87E+00  | -2,963248007 | 1,36E+00  | 2,44E-01 | 5,50E-01 | Cdh6          | 3,65 | No  |
| ENSMUSG00000039391 | -1,98E-02 | -3,033655952 | 2,83E-11  | 1,00E+00 | 1,00E+00 | Ccdc81        | 0,99 | No  |
| ENSMUSG00000039395 | -6,21E-01 | 6,098917627  | 9,30E+01  | 5,31E-22 | 1,47E-19 | Mreg          | 0,65 | Yes |
| ENSMUSG00000039396 | 3,47E-01  | 4,690906408  | 1,98E+01  | 8,69E-06 | 2,96E-04 | Neil3         | 1,27 | Yes |
| ENSMUSG00000039405 | -2,71E+00 | -2,997995711 | 2,91E+00  | 8,82E-02 | 3,79E-01 | Prss23        | 0,15 | No  |
| ENSMUSG00000039410 | -2,83E-03 | 1,160120607  | 2,21E-04  | 9,88E-01 | 1,00E+00 | Prdm16        | 1,00 | No  |
| ENSMUSG00000039414 | 8,38E-02  | 5,722511124  | 1,55E+00  | 2,12E-01 | 5,50E-01 | Heatr5b       | 1,06 | No  |
| ENSMUSG00000039419 | 2,19E-01  | -2,600713636 | 6,02E-02  | 8,06E-01 | 9,64E-01 | Cntnap2       | 1,16 | No  |
| ENSMUSG00000039427 | 1,15E-01  | 4,252002006  | 1,85E+00  | 1,74E-01 | 5,32E-01 | Alg1          | 1,08 | No  |
| ENSMUSG00000039428 | 1,33E-01  | 5,536665498  | 3,67E+00  | 5,56E-02 | 2,89E-01 | Tmem135       | 1,10 | No  |
| ENSMUSG00000039431 | 2,34E-01  | 3,457761813  | 5,56E+00  | 1,84E-02 | 1,43E-01 | Mtmr7         | 1,18 | No  |

|                    |           |              |          |          |          |          |      |     |
|--------------------|-----------|--------------|----------|----------|----------|----------|------|-----|
| ENSMUSG00000039438 | -6,93E-02 | -1,711710433 | 1,35E-02 | 9,08E-01 | 1,00E+00 | Ttc36    | 0,95 | No  |
| ENSMUSG00000039449 | 1,51E-01  | 5,979287322  | 5,31E+00 | 2,12E-02 | 1,57E-01 | Prpf18   | 1,11 | No  |
| ENSMUSG00000039450 | -7,02E-02 | 4,418699396  | 7,47E-01 | 3,87E-01 | 6,87E-01 | Dcxr     | 0,95 | No  |
| ENSMUSG00000039452 | 7,86E-02  | 6,155222197  | 1,48E+00 | 2,23E-01 | 5,50E-01 | Snx22    | 1,06 | No  |
| ENSMUSG00000039456 | 1,40E-01  | 6,335079056  | 4,91E+00 | 2,67E-02 | 1,83E-01 | Morc3    | 1,10 | No  |
| ENSMUSG00000039457 | -7,18E-01 | 2,209350437  | 2,86E+01 | 8,98E-08 | 5,09E-06 | Ppl      | 0,61 | Yes |
| ENSMUSG00000039458 | -1,23E-01 | 5,560876931  | 3,24E+00 | 7,20E-02 | 3,40E-01 | Mtmt12   | 0,92 | No  |
| ENSMUSG00000039461 | -2,09E-01 | 3,755985274  | 5,19E+00 | 2,27E-02 | 1,64E-01 | Tcta     | 0,87 | No  |
| ENSMUSG00000039462 | 4,69E-01  | -1,847866028 | 5,79E-01 | 4,47E-01 | 7,37E-01 | Col10a1  | 1,38 | No  |
| ENSMUSG00000039463 | 1,55E-01  | 5,32893427   | 4,79E+00 | 2,86E-02 | 1,92E-01 | Slc9a8   | 1,11 | No  |
| ENSMUSG00000039470 | 9,50E-02  | 2,439825614  | 5,05E-01 | 4,77E-01 | 7,65E-01 | Zdhhc2   | 1,07 | No  |
| ENSMUSG00000039473 | 1,81E-02  | 6,858924397  | 8,84E-02 | 7,66E-01 | 9,40E-01 | Ubn1     | 1,01 | No  |
| ENSMUSG00000039474 | -3,21E-03 | 4,173017421  | 1,42E-03 | 9,70E-01 | 1,00E+00 | Wfs1     | 1,00 | No  |
| ENSMUSG00000039476 | -7,38E-02 | -3,033659033 | 2,66E-03 | 9,59E-01 | 1,00E+00 | Prrx2    | 0,95 | No  |
| ENSMUSG00000039477 | 3,02E-02  | 7,117072047  | 2,52E-01 | 6,16E-01 | 8,54E-01 | Tnrc18   | 1,02 | No  |
| ENSMUSG00000039478 | -4,12E-02 | 1,773849655  | 6,94E-02 | 7,92E-01 | 9,55E-01 | Micu3    | 0,97 | No  |
| ENSMUSG00000039480 | 3,77E-02  | 3,788233579  | 1,62E-01 | 6,87E-01 | 8,98E-01 | Nt5dc1   | 1,03 | No  |
| ENSMUSG00000039481 | -7,90E-01 | -2,268065373 | 9,08E-01 | 3,41E-01 | 6,41E-01 | Nrtn     | 0,58 | No  |
| ENSMUSG00000039483 | 4,58E-02  | 5,1207974    | 3,98E-01 | 5,28E-01 | 8,04E-01 | Asb6     | 1,03 | No  |
| ENSMUSG00000039485 | 5,34E-02  | 1,750246338  | 1,13E-01 | 7,37E-01 | 9,25E-01 | Tspyl4   | 1,04 | No  |
| ENSMUSG00000039492 | 3,10E+00  | -2,963298937 | 3,91E+00 | 4,81E-02 | 2,64E-01 | Ccdc27   | 8,56 | No  |
| ENSMUSG00000039496 | 1,30E-01  | 0,036627122  | 2,26E-01 | 6,35E-01 | 8,66E-01 | Cdnf     | 1,09 | No  |
| ENSMUSG00000039497 | 2,26E-01  | 5,77602501   | 1,13E+01 | 7,69E-04 | 1,30E-02 | Dse      | 1,17 | Yes |
| ENSMUSG00000039501 | -2,12E-03 | 7,061144922  | 1,23E-03 | 9,72E-01 | 1,00E+00 | Znfx1    | 1,00 | No  |
| ENSMUSG00000039508 | -1,89E+00 | -2,896152932 | 1,43E+00 | 2,31E-01 | 5,50E-01 | Fam26d   | 0,27 | No  |
| ENSMUSG00000039509 | 1,45E-01  | 4,819372958  | 3,63E+00 | 5,68E-02 | 2,93E-01 | Nup133   | 1,11 | No  |
| ENSMUSG00000039512 | -6,88E-02 | 5,071134818  | 8,92E-01 | 3,45E-01 | 6,46E-01 | Uhrf1bp1 | 0,95 | No  |
| ENSMUSG00000039515 | 8,91E-02  | 7,612523934  | 2,28E+00 | 1,31E-01 | 4,55E-01 | Ptpa     | 1,06 | No  |
| ENSMUSG00000039518 | -2,74E+00 | -3,033596063 | 2,99E+00 | 8,38E-02 | 3,71E-01 | Cdsn     | 0,15 | No  |
| ENSMUSG00000039519 | -5,88E-02 | -3,033616507 | 1,62E-03 | 9,68E-01 | 1,00E+00 | Cyp7b1   | 0,96 | No  |
| ENSMUSG00000039523 | 7,52E-02  | 4,693030689  | 9,39E-01 | 3,32E-01 | 6,33E-01 | Cep104   | 1,05 | No  |
| ENSMUSG00000039529 | 1,23E-01  | 0,592797149  | 2,69E-01 | 6,04E-01 | 8,49E-01 | Atp8b1   | 1,09 | No  |

|                    |           |              |          |          |          |               |      |     |
|--------------------|-----------|--------------|----------|----------|----------|---------------|------|-----|
| ENSMUSG00000039530 | 1,23E-01  | 4,978812033  | 2,71E+00 | 9,98E-02 | 3,92E-01 | Tusc3         | 1,09 | No  |
| ENSMUSG00000039531 | 8,66E-03  | 5,151718133  | 1,45E-02 | 9,04E-01 | 1,00E+00 | Zufsp         | 1,01 | No  |
| ENSMUSG00000039536 | 5,57E-02  | 5,921278857  | 7,12E-01 | 3,99E-01 | 6,98E-01 | Stau1         | 1,04 | No  |
| ENSMUSG00000039539 | -2,74E+00 | -3,033596063 | 2,99E+00 | 8,38E-02 | 3,71E-01 | Sgcz          | 0,15 | No  |
| ENSMUSG00000039542 | -6,72E-01 | -0,946206507 | 2,40E+00 | 1,21E-01 | 4,34E-01 | Ncam1         | 0,63 | No  |
| ENSMUSG00000039543 | 1,86E+00  | -3,033661846 | 1,35E+00 | 2,46E-01 | 5,50E-01 | Cfap70        | 3,62 | No  |
| ENSMUSG00000039546 | -1,94E+00 | -3,107619243 | 1,50E+00 | 2,21E-01 | 5,50E-01 | Ajap1         | 0,26 | No  |
| ENSMUSG00000039552 | 2,06E+00  | -2,355663125 | 5,42E+00 | 1,99E-02 | 1,51E-01 | Rsph4a        | 4,18 | No  |
| ENSMUSG00000039563 | -9,96E-01 | -2,448612037 | 1,20E+00 | 2,73E-01 | 5,69E-01 | 2210406O10Rik | 0,50 | No  |
| ENSMUSG00000039568 | 2,61E-01  | 5,722207238  | 1,49E+01 | 1,12E-04 | 2,67E-03 | Uald1         | 1,20 | Yes |
| ENSMUSG00000039577 | -7,65E-02 | 1,214444302  | 1,47E-01 | 7,02E-01 | 9,05E-01 | Nphp4         | 0,95 | No  |
| ENSMUSG00000039578 | 4,49E-01  | -1,627539196 | 5,56E-01 | 4,56E-01 | 7,45E-01 | Ccser1        | 1,37 | No  |
| ENSMUSG00000039579 | -5,91E-01 | 0,288502533  | 4,51E+00 | 3,38E-02 | 2,16E-01 | Grin3a        | 0,66 | No  |
| ENSMUSG00000039585 | 1,45E-01  | 6,224524397  | 5,11E+00 | 2,38E-02 | 1,69E-01 | Myo9a         | 1,11 | No  |
| ENSMUSG00000039599 | -1,47E-01 | 3,912401407  | 2,75E+00 | 9,72E-02 | 3,89E-01 | Fam149b       | 0,90 | No  |
| ENSMUSG00000039601 | -1,94E+00 | -3,107619243 | 1,50E+00 | 2,21E-01 | 5,50E-01 | Rcan2         | 0,26 | No  |
| ENSMUSG00000039607 | -7,27E-01 | -1,401198801 | 2,00E+00 | 1,58E-01 | 5,04E-01 | Rbms3         | 0,60 | No  |
| ENSMUSG00000039611 | -1,17E+00 | -1,246953522 | 5,56E+00 | 1,84E-02 | 1,43E-01 | Tmem246       | 0,44 | No  |
| ENSMUSG00000039615 | 8,33E-02  | 5,457684967  | 1,43E+00 | 2,31E-01 | 5,50E-01 | Stub1         | 1,06 | No  |
| ENSMUSG00000039616 | 3,57E-02  | 4,783473423  | 2,20E-01 | 6,39E-01 | 8,69E-01 | Mocos         | 1,03 | No  |
| ENSMUSG00000039617 | -5,50E-02 | 5,441462574  | 6,24E-01 | 4,29E-01 | 7,23E-01 | Gm7488        | 0,96 | No  |
| ENSMUSG00000039620 | -1,89E+00 | -3,1076441   | 1,42E+00 | 2,33E-01 | 5,50E-01 | 6430573F11Rik | 0,27 | No  |
| ENSMUSG00000039621 | -1,28E-01 | 8,900542417  | 5,04E+00 | 2,48E-02 | 1,74E-01 | Prex1         | 0,92 | No  |
| ENSMUSG00000039623 | 1,27E-01  | 5,969721987  | 3,76E+00 | 5,25E-02 | 2,79E-01 | Ap5z1         | 1,09 | No  |
| ENSMUSG00000039628 | -1,84E-01 | -1,682977234 | 9,85E-02 | 7,54E-01 | 9,33E-01 | Hs3st6        | 0,88 | No  |
| ENSMUSG00000039629 | -5,97E-01 | 5,985880818  | 8,41E+01 | 4,65E-20 | 1,04E-17 | Strip2        | 0,66 | Yes |
| ENSMUSG00000039630 | 8,31E-02  | 8,757992996  | 2,11E+00 | 1,46E-01 | 4,84E-01 | Hnrnpu        | 1,06 | No  |
| ENSMUSG00000039632 | -3,52E-02 | -2,711697205 | 8,68E-04 | 9,76E-01 | 1,00E+00 | Ccdc151       | 0,98 | No  |
| ENSMUSG00000039633 | 4,34E-02  | 3,914641642  | 2,37E-01 | 6,26E-01 | 8,60E-01 | Lonrf1        | 1,03 | No  |
| ENSMUSG00000039634 | -5,06E-02 | 0,924997204  | 6,14E-02 | 8,04E-01 | 9,63E-01 | Zfp189        | 0,97 | No  |
| ENSMUSG00000039637 | 1,39E-01  | 6,824499281  | 5,10E+00 | 2,39E-02 | 1,69E-01 | Coro7         | 1,10 | No  |
| ENSMUSG00000039640 | 1,00E-01  | 4,836532339  | 1,74E+00 | 1,87E-01 | 5,50E-01 | Mrpl12        | 1,07 | No  |

|                    |           |              |           |          |          |          |      |     |
|--------------------|-----------|--------------|-----------|----------|----------|----------|------|-----|
| ENSMUSG00000039646 | -6,74E-04 | 4,869319076  | 7,84E-05  | 9,93E-01 | 1,00E+00 | Vasn     | 1,00 | No  |
| ENSMUSG00000039648 | 2,22E-01  | 1,206235053  | 1,29E+00  | 2,55E-01 | 5,50E-01 | Kyat1    | 1,17 | No  |
| ENSMUSG00000039652 | 1,19E-01  | 2,058042236  | 6,44E-01  | 4,22E-01 | 7,18E-01 | Cpeb3    | 1,09 | No  |
| ENSMUSG00000039653 | -8,38E-01 | -2,770640249 | 3,85E-01  | 5,35E-01 | 8,07E-01 | Baat     | 0,56 | No  |
| ENSMUSG00000039656 | -9,92E-02 | 5,641735218  | 2,13E+00  | 1,44E-01 | 4,80E-01 | Rxrb     | 0,93 | No  |
| ENSMUSG00000039660 | 6,41E-02  | 4,053780526  | 5,27E-01  | 4,68E-01 | 7,56E-01 | Spout1   | 1,05 | No  |
| ENSMUSG00000039661 | -1,87E+00 | -3,03364178  | 1,41E+00  | 2,36E-01 | 5,50E-01 | Dusp26   | 0,27 | No  |
| ENSMUSG00000039662 | -7,77E-04 | 5,985855537  | 1,41E-04  | 9,91E-01 | 1,00E+00 | Icmt     | 1,00 | No  |
| ENSMUSG00000039670 | -3,16E-02 | 1,385896567  | 3,06E-02  | 8,61E-01 | 9,96E-01 | Oxld1    | 0,98 | No  |
| ENSMUSG00000039671 | 1,20E-01  | 6,730722051  | 3,76E+00  | 5,26E-02 | 2,79E-01 | Zmynd8   | 1,09 | No  |
| ENSMUSG00000039672 | 2,67E+00  | -3,033636951 | 2,76E+00  | 9,68E-02 | 3,88E-01 | Kcne2    | 6,36 | No  |
| ENSMUSG00000039676 | -7,73E-01 | -0,535402377 | 4,93E+00  | 2,63E-02 | 1,82E-01 | Capsl    | 0,59 | No  |
| ENSMUSG00000039678 | 4,04E-02  | 7,313341098  | 4,59E-01  | 4,98E-01 | 7,83E-01 | Tbc1d13  | 1,03 | No  |
| ENSMUSG00000039680 | -2,28E-01 | 4,222919672  | 7,33E+00  | 6,79E-03 | 7,03E-02 | Mrps6    | 0,85 | No  |
| ENSMUSG00000039682 | 7,54E-02  | 6,020375941  | 1,33E+00  | 2,48E-01 | 5,50E-01 | Lap3     | 1,05 | No  |
| ENSMUSG00000039683 | 1,68E-01  | -0,711722713 | 1,63E-01  | 6,86E-01 | 8,97E-01 | Sdk1     | 1,12 | No  |
| ENSMUSG00000039684 | 3,44E-02  | 7,448011621  | 3,35E-01  | 5,63E-01 | 8,26E-01 | Gm5422   | 1,02 | No  |
| ENSMUSG00000039686 | -1,19E-01 | 5,011535114  | 2,65E+00  | 1,04E-01 | 3,96E-01 | Zer1     | 0,92 | No  |
| ENSMUSG00000039691 | -6,17E-01 | -0,682967812 | 2,67E+00  | 1,02E-01 | 3,95E-01 | Tspan10  | 0,65 | No  |
| ENSMUSG00000039693 | 1,34E-01  | 1,866467475  | 7,10E-01  | 4,00E-01 | 6,98E-01 | Msantd3  | 1,10 | No  |
| ENSMUSG00000039697 | -4,21E-01 | 5,863073234  | 4,04E+01  | 2,12E-10 | 1,89E-08 | Ncoa7    | 0,75 | Yes |
| ENSMUSG00000039699 | -7,27E-02 | 2,759479662  | 3,87E-01  | 5,34E-01 | 8,07E-01 | Batf2    | 0,95 | No  |
| ENSMUSG00000039701 | 2,74E-03  | 3,295465754  | 6,89E-04  | 9,79E-01 | 1,00E+00 | Usp53    | 1,00 | No  |
| ENSMUSG00000039703 | -6,45E-02 | 6,965482609  | 1,12E+00  | 2,89E-01 | 5,85E-01 | Nploc4   | 0,96 | No  |
| ENSMUSG00000039704 | 2,13E-01  | 4,527978664  | 6,95E+00  | 8,39E-03 | 8,22E-02 | Lmbrd2   | 1,16 | No  |
| ENSMUSG00000039706 | 3,14E-02  | -3,107617333 | -7,69E-10 | 1,00E+00 | 1,00E+00 | Ldb2     | 1,02 | No  |
| ENSMUSG00000039713 | 2,69E-01  | 4,03579617   | 9,31E+00  | 2,28E-03 | 3,11E-02 | Plekhg5  | 1,20 | Yes |
| ENSMUSG00000039714 | -9,14E-01 | -2,65508874  | 7,30E-01  | 3,93E-01 | 6,93E-01 | Cplx3    | 0,53 | No  |
| ENSMUSG00000039715 | 1,36E-01  | 2,471049267  | 1,07E+00  | 3,01E-01 | 5,98E-01 | Wdr34    | 1,10 | No  |
| ENSMUSG00000039716 | 1,58E-01  | -0,607304381 | 1,72E-01  | 6,79E-01 | 8,92E-01 | Dock3    | 1,12 | No  |
| ENSMUSG00000039720 | -6,79E-01 | -2,146032573 | 7,83E-01  | 3,76E-01 | 6,77E-01 | Got1l1   | 0,62 | No  |
| ENSMUSG00000039725 | 2,01E-01  | 2,712277696  | 2,86E+00  | 9,07E-02 | 3,82E-01 | Trp53rka | 1,15 | No  |



|                    |           |              |          |          |          |               |      |     |
|--------------------|-----------|--------------|----------|----------|----------|---------------|------|-----|
| ENSMUSG00000039728 | 1,87E+00  | -3,107639691 | 1,38E+00 | 2,40E-01 | 5,50E-01 | Slc6a5        | 3,67 | No  |
| ENSMUSG00000039735 | -5,94E-01 | 6,148568183  | 8,58E+01 | 2,02E-20 | 4,77E-18 | Fnbp1l        | 0,66 | Yes |
| ENSMUSG00000039737 | -4,22E-02 | 3,66178498   | 1,93E-01 | 6,60E-01 | 8,82E-01 | Prkrip1       | 0,97 | No  |
| ENSMUSG00000039738 | 2,84E-01  | 4,919786426  | 1,45E+01 | 1,42E-04 | 3,25E-03 | Slx4          | 1,22 | Yes |
| ENSMUSG00000039740 | -1,62E-01 | 5,425680971  | 5,44E+00 | 1,97E-02 | 1,50E-01 | Alg2          | 0,89 | No  |
| ENSMUSG00000039741 | 5,48E-01  | 2,899670843  | 2,16E+01 | 3,36E-06 | 1,29E-04 | Bahcc1        | 1,46 | Yes |
| ENSMUSG00000039742 | -1,32E+00 | -2,896135995 | 1,09E+00 | 2,97E-01 | 5,93E-01 | Fam71f1       | 0,40 | No  |
| ENSMUSG00000039745 | 1,30E-02  | 5,022634023  | 3,15E-02 | 8,59E-01 | 9,95E-01 | Htatip2       | 1,01 | No  |
| ENSMUSG00000039747 | -1,06E-01 | 5,778768121  | 2,52E+00 | 1,12E-01 | 4,13E-01 | Orai2         | 0,93 | No  |
| ENSMUSG00000039748 | 3,18E-01  | 3,236655595  | 8,93E+00 | 2,80E-03 | 3,63E-02 | Exo1          | 1,25 | Yes |
| ENSMUSG00000039753 | -5,57E-02 | 6,344174695  | 7,73E-01 | 3,79E-01 | 6,80E-01 | Fbxl5         | 0,96 | No  |
| ENSMUSG00000039754 | 2,15E-01  | 2,885510455  | 3,39E+00 | 6,57E-02 | 3,21E-01 | Alkbh4        | 1,16 | No  |
| ENSMUSG00000039756 | 2,84E-03  | 5,632801727  | 1,74E-03 | 9,67E-01 | 1,00E+00 | Dnttip2       | 1,00 | No  |
| ENSMUSG00000039759 | -8,02E-02 | 2,966382511  | 5,19E-01 | 4,71E-01 | 7,60E-01 | Thap3         | 0,95 | No  |
| ENSMUSG00000039760 | -6,48E-02 | -2,963249916 | 1,90E-03 | 9,65E-01 | 1,00E+00 | Il22ra2       | 0,96 | No  |
| ENSMUSG00000039763 | 1,36E-01  | 1,305695628  | 5,62E-01 | 4,53E-01 | 7,43E-01 | Dnajc28       | 1,10 | No  |
| ENSMUSG00000039765 | 1,69E-01  | 1,635589507  | 1,01E+00 | 3,15E-01 | 6,15E-01 | Cc2d2a        | 1,12 | No  |
| ENSMUSG00000039768 | 1,27E-01  | 5,530495667  | 3,41E+00 | 6,46E-02 | 3,19E-01 | Dnajc11       | 1,09 | No  |
| ENSMUSG00000039770 | -3,64E-02 | 6,339042009  | 3,28E-01 | 5,67E-01 | 8,29E-01 | Ypel5         | 0,98 | No  |
| ENSMUSG00000039771 | 6,45E-02  | 4,10685487   | 5,38E-01 | 4,63E-01 | 7,52E-01 | Polr2j        | 1,05 | No  |
| ENSMUSG00000039774 | -2,01E-01 | 4,192304403  | 5,67E+00 | 1,73E-02 | 1,37E-01 | Galnt12       | 0,87 | No  |
| ENSMUSG00000039781 | 3,17E-01  | 4,571196303  | 1,58E+01 | 7,02E-05 | 1,81E-03 | Cep131        | 1,25 | Yes |
| ENSMUSG00000039782 | -2,74E-02 | 5,51764498   | 1,58E-01 | 6,91E-01 | 9,00E-01 | Cpeb2         | 0,98 | No  |
| ENSMUSG00000039783 | -1,13E-01 | 5,900262684  | 3,00E+00 | 8,35E-02 | 3,71E-01 | Kmo           | 0,92 | No  |
| ENSMUSG00000039787 | 2,37E-01  | 4,628637756  | 9,06E+00 | 2,61E-03 | 3,45E-02 | Cercam        | 1,18 | Yes |
| ENSMUSG00000039789 | -6,73E-02 | 4,171270206  | 6,33E-01 | 4,26E-01 | 7,20E-01 | Zfp597        | 0,95 | No  |
| ENSMUSG00000039795 | -1,47E-01 | 3,071195649  | 1,78E+00 | 1,82E-01 | 5,44E-01 | Zfand1        | 0,90 | No  |
| ENSMUSG00000039798 | -4,03E-02 | 1,322497889  | 4,48E-02 | 8,32E-01 | 9,78E-01 | 2600006K01Rik | 0,97 | No  |
| ENSMUSG00000039801 | 4,08E-02  | 4,749119553  | 2,81E-01 | 5,96E-01 | 8,44E-01 | 2410089E03Rik | 1,03 | No  |
| ENSMUSG00000039804 | -2,70E-02 | 5,282918805  | 1,46E-01 | 7,03E-01 | 9,06E-01 | Ncoa5         | 0,98 | No  |
| ENSMUSG00000039809 | -9,02E-02 | 0,56961465   | 1,32E-01 | 7,16E-01 | 9,13E-01 | Gabbr2        | 0,94 | No  |
| ENSMUSG00000039810 | -4,14E-02 | 4,087854199  | 2,30E-01 | 6,32E-01 | 8,64E-01 | Zc3h10        | 0,97 | No  |

|                    |           |              |          |          |          |               |      |     |
|--------------------|-----------|--------------|----------|----------|----------|---------------|------|-----|
| ENSMUSG00000039813 | 2,75E-01  | 5,65358497   | 1,64E+01 | 5,26E-05 | 1,42E-03 | Tbc1d2        | 1,21 | Yes |
| ENSMUSG00000039814 | 4,22E-01  | 0,632751933  | 3,20E+00 | 7,37E-02 | 3,45E-01 | Xkr5          | 1,34 | No  |
| ENSMUSG00000039824 | -2,78E-02 | 0,316888813  | 1,05E-02 | 9,19E-01 | 1,00E+00 | Myl6b         | 0,98 | No  |
| ENSMUSG00000039826 | 2,47E-01  | 5,091340952  | 1,14E+01 | 7,49E-04 | 1,28E-02 | Trub2         | 1,19 | Yes |
| ENSMUSG00000039828 | 6,60E-02  | 3,272426076  | 3,83E-01 | 5,36E-01 | 8,08E-01 | Wdr70         | 1,05 | No  |
| ENSMUSG00000039831 | -2,47E-01 | -0,051779695 | 7,00E-01 | 4,03E-01 | 7,01E-01 | Arhgap29      | 0,84 | No  |
| ENSMUSG00000039834 | 6,47E-02  | 5,389752462  | 8,49E-01 | 3,57E-01 | 6,58E-01 | Zfp335        | 1,05 | No  |
| ENSMUSG00000039835 | -1,17E-01 | 0,191221172  | 1,82E-01 | 6,70E-01 | 8,88E-01 | Nhsl1         | 0,92 | No  |
| ENSMUSG00000039838 | 1,21E-02  | -3,033650469 | 7,34E-11 | 1,00E+00 | 1,00E+00 | Slc45a1       | 1,01 | No  |
| ENSMUSG00000039840 | 1,30E-01  | 5,440692243  | 3,51E+00 | 6,10E-02 | 3,06E-01 | Epg5          | 1,09 | No  |
| ENSMUSG00000039841 | -1,28E-01 | 5,384887222  | 3,35E+00 | 6,72E-02 | 3,26E-01 | Zfp800        | 0,92 | No  |
| ENSMUSG00000039842 | -1,15E-01 | 3,760909813  | 1,50E+00 | 2,21E-01 | 5,50E-01 | Mcph1         | 0,92 | No  |
| ENSMUSG00000039844 | -5,73E-02 | 6,521603621  | 8,38E-01 | 3,60E-01 | 6,61E-01 | Rapgef1       | 0,96 | No  |
| ENSMUSG00000039849 | -2,24E-02 | 5,860212635  | 1,14E-01 | 7,36E-01 | 9,24E-01 | Pcif1         | 0,98 | No  |
| ENSMUSG00000039850 | -1,51E-01 | 3,640656403  | 2,59E+00 | 1,07E-01 | 4,01E-01 | Endov         | 0,90 | No  |
| ENSMUSG00000039851 | -3,47E-01 | -0,847739333 | 8,03E-01 | 3,70E-01 | 6,71E-01 | 4932438H23Rik | 0,79 | No  |
| ENSMUSG00000039852 | 1,25E-01  | 5,874498666  | 3,54E+00 | 6,01E-02 | 3,03E-01 | Rere          | 1,09 | No  |
| ENSMUSG00000039853 | -4,90E-02 | 4,801407598  | 4,21E-01 | 5,17E-01 | 7,97E-01 | Trim14        | 0,97 | No  |
| ENSMUSG00000039860 | -8,94E-02 | -2,711742702 | 5,34E-03 | 9,42E-01 | 1,00E+00 | Srrm3         | 0,94 | No  |
| ENSMUSG00000039865 | 1,81E+00  | -3,10765737  | 1,28E+00 | 2,58E-01 | 5,50E-01 | Slc44a3       | 3,49 | No  |
| ENSMUSG00000039873 | 1,80E-01  | 2,246034881  | 1,65E+00 | 1,99E-01 | 5,50E-01 | Neurl2        | 1,13 | No  |
| ENSMUSG00000039878 | -6,66E-02 | -0,300500409 | 4,11E-02 | 8,39E-01 | 9,83E-01 | Slc39a5       | 0,95 | No  |
| ENSMUSG00000039879 | -1,06E-01 | 5,412357084  | 2,29E+00 | 1,31E-01 | 4,54E-01 | Heca          | 0,93 | No  |
| ENSMUSG00000039883 | 1,87E+00  | -3,107639691 | 1,38E+00 | 2,40E-01 | 5,50E-01 | Lrrc17        | 3,67 | No  |
| ENSMUSG00000039886 | 7,49E-03  | 3,799571076  | 6,56E-03 | 9,35E-01 | 1,00E+00 | Tmem120a      | 1,01 | No  |
| ENSMUSG00000039887 | 9,03E-02  | 3,065102089  | 6,51E-01 | 4,20E-01 | 7,15E-01 | Alg14         | 1,06 | No  |
| ENSMUSG00000039891 | -9,54E-02 | 2,580659182  | 6,05E-01 | 4,37E-01 | 7,30E-01 | Txlnb         | 0,94 | No  |
| ENSMUSG00000039899 | 3,15E-02  | 7,208622501  | 2,75E-01 | 6,00E-01 | 8,46E-01 | Fgl2          | 1,02 | No  |
| ENSMUSG00000039901 | 1,65E-01  | 3,009902777  | 2,09E+00 | 1,49E-01 | 4,89E-01 | 9130011E15Rik | 1,12 | No  |
| ENSMUSG00000039903 | 2,46E-01  | -1,448761614 | 2,03E-01 | 6,52E-01 | 8,77E-01 | Eva1c         | 1,19 | No  |
| ENSMUSG00000039908 | 5,57E-01  | 3,45406408   | 3,07E+01 | 2,95E-08 | 1,84E-06 | Slc26a11      | 1,47 | Yes |
| ENSMUSG00000039910 | 2,29E-01  | 6,252743044  | 1,26E+01 | 3,77E-04 | 7,28E-03 | Cited2        | 1,17 | Yes |

|                    |           |              |          |          |          |          |      |     |
|--------------------|-----------|--------------|----------|----------|----------|----------|------|-----|
| ENSMUSG00000039911 | -4,23E-01 | 3,578628425  | 1,95E+01 | 1,00E-05 | 3,37E-04 | Spsb1    | 0,75 | Yes |
| ENSMUSG00000039914 | 1,09E-01  | 4,419476743  | 1,80E+00 | 1,80E-01 | 5,42E-01 | Coq10a   | 1,08 | No  |
| ENSMUSG00000039917 | 2,72E-02  | 3,839027478  | 8,88E-02 | 7,66E-01 | 9,40E-01 | Rhbdd2   | 1,02 | No  |
| ENSMUSG00000039929 | 2,00E-01  | 4,063272154  | 5,26E+00 | 2,18E-02 | 1,59E-01 | Urb1     | 1,15 | No  |
| ENSMUSG00000039934 | 3,34E-02  | 6,699404733  | 2,92E-01 | 5,89E-01 | 8,41E-01 | Gsap     | 1,02 | No  |
| ENSMUSG00000039936 | 3,08E-01  | 9,460372847  | 2,96E+01 | 5,42E-08 | 3,21E-06 | Pik3cd   | 1,24 | Yes |
| ENSMUSG00000039942 | -2,89E-01 | 6,454634629  | 2,12E+01 | 4,07E-06 | 1,52E-04 | Ptger4   | 0,82 | Yes |
| ENSMUSG00000039943 | -1,23E-02 | -0,963264624 | 8,66E-04 | 9,77E-01 | 1,00E+00 | Plcb4    | 0,99 | No  |
| ENSMUSG00000039952 | 1,41E-01  | 6,745839061  | 5,23E+00 | 2,23E-02 | 1,62E-01 | Dag1     | 1,10 | No  |
| ENSMUSG00000039953 | -1,87E-01 | 4,651846342  | 5,71E+00 | 1,69E-02 | 1,36E-01 | Clstn1   | 0,88 | No  |
| ENSMUSG00000039956 | -1,53E+00 | -1,401201101 | 7,09E+00 | 7,74E-03 | 7,71E-02 | Mrap     | 0,35 | No  |
| ENSMUSG00000039958 | -1,23E-01 | 2,582197134  | 9,19E-01 | 3,38E-01 | 6,38E-01 | Etfbkmt  | 0,92 | No  |
| ENSMUSG00000039959 | 2,69E-01  | 7,430463531  | 2,04E+01 | 6,34E-06 | 2,22E-04 | Hip1     | 1,20 | Yes |
| ENSMUSG00000039960 | -4,19E-01 | 0,814639592  | 3,64E+00 | 5,64E-02 | 2,92E-01 | Rhou     | 0,75 | No  |
| ENSMUSG00000039963 | -4,15E-01 | 0,604635567  | 3,02E+00 | 8,25E-02 | 3,69E-01 | Ccdc40   | 0,75 | No  |
| ENSMUSG00000039967 | 9,22E-03  | 6,113580314  | 2,03E-02 | 8,87E-01 | 1,00E+00 | Zfp292   | 1,01 | No  |
| ENSMUSG00000039968 | -2,58E-01 | 5,731993121  | 1,48E+01 | 1,18E-04 | 2,77E-03 | Rsbni1   | 0,84 | Yes |
| ENSMUSG00000039976 | 2,96E-01  | 5,298370031  | 1,71E+01 | 3,60E-05 | 1,03E-03 | Tbc1d16  | 1,23 | Yes |
| ENSMUSG00000039977 | 1,86E+00  | -2,896125762 | 1,35E+00 | 2,46E-01 | 5,50E-01 | Deup1    | 3,63 | No  |
| ENSMUSG00000039981 | -2,09E-01 | 3,465800083  | 4,61E+00 | 3,18E-02 | 2,07E-01 | Zc3h12d  | 0,87 | No  |
| ENSMUSG00000039982 | -1,08E-01 | 5,44072583   | 2,43E+00 | 1,19E-01 | 4,30E-01 | Dtx4     | 0,93 | No  |
| ENSMUSG00000039983 | -4,94E-03 | 4,329200506  | 3,50E-03 | 9,53E-01 | 1,00E+00 | Ccdc32   | 1,00 | No  |
| ENSMUSG00000039985 | -4,82E-01 | 4,411439371  | 3,62E+01 | 1,77E-09 | 1,39E-07 | Fam60a   | 0,72 | Yes |
| ENSMUSG00000039987 | -8,48E-02 | 4,597866411  | 1,15E+00 | 2,83E-01 | 5,79E-01 | Phtf2    | 0,94 | No  |
| ENSMUSG00000039988 | -9,57E-03 | 5,438338934  | 1,89E-02 | 8,91E-01 | 1,00E+00 | Ankrd13c | 0,99 | No  |
| ENSMUSG00000039989 | 1,09E-01  | 3,563431801  | 1,25E+00 | 2,63E-01 | 5,57E-01 | Cbx4     | 1,08 | No  |
| ENSMUSG00000039990 | 6,74E-02  | 4,043848851  | 6,00E-01 | 4,38E-01 | 7,31E-01 | Edrf1    | 1,05 | No  |
| ENSMUSG00000039994 | 9,38E-02  | 4,996746812  | 1,63E+00 | 2,02E-01 | 5,50E-01 | Timeless | 1,07 | No  |
| ENSMUSG00000039997 | 8,52E-02  | 5,795450974  | 1,64E+00 | 2,00E-01 | 5,50E-01 | Ifi203   | 1,06 | No  |
| ENSMUSG00000040003 | -5,39E-02 | 0,248029232  | 4,19E-02 | 8,38E-01 | 9,82E-01 | Magi2    | 0,96 | No  |
| ENSMUSG00000040006 | -1,44E-01 | 4,649105129  | 3,35E+00 | 6,73E-02 | 3,26E-01 | Ginm1    | 0,91 | No  |
| ENSMUSG00000040007 | -1,50E-01 | 6,162305652  | 5,49E+00 | 1,91E-02 | 1,47E-01 | Bahd1    | 0,90 | No  |

|                    |           |              |           |          |          |           |      |     |
|--------------------|-----------|--------------|-----------|----------|----------|-----------|------|-----|
| ENSMUSG00000040009 | 1,13E-01  | -1,070249744 | 7,03E-02  | 7,91E-01 | 9,55E-01 | Gnaz      | 1,08 | No  |
| ENSMUSG00000040010 | -6,28E-02 | 7,104669746  | 1,08E+00  | 2,98E-01 | 5,94E-01 | Slc7a5    | 0,96 | No  |
| ENSMUSG00000040013 | -1,94E+00 | -3,107619243 | 1,50E+00  | 2,21E-01 | 5,50E-01 | Fkbp6     | 0,26 | No  |
| ENSMUSG00000040016 | -8,40E-02 | 1,752673971  | 2,69E-01  | 6,04E-01 | 8,49E-01 | Ptger3    | 0,94 | No  |
| ENSMUSG00000040017 | -3,83E-02 | -3,107651936 | -7,91E-11 | 1,00E+00 | 1,00E+00 | Saa4      | 0,97 | No  |
| ENSMUSG00000040018 | 6,44E-02  | 5,470213616  | 8,71E-01  | 3,51E-01 | 6,52E-01 | Cox15     | 1,05 | No  |
| ENSMUSG00000040021 | 1,15E-01  | 6,255456108  | 3,21E+00  | 7,31E-02 | 3,43E-01 | Lats1     | 1,08 | No  |
| ENSMUSG00000040022 | 1,29E-01  | 3,424348257  | 1,63E+00  | 2,02E-01 | 5,50E-01 | Rab11fip2 | 1,09 | No  |
| ENSMUSG00000040025 | 1,42E-02  | 5,998944935  | 4,70E-02  | 8,28E-01 | 9,76E-01 | Ythdf2    | 1,01 | No  |
| ENSMUSG00000040026 | 1,95E-01  | 3,005277953  | 2,83E+00  | 9,23E-02 | 3,83E-01 | Saa3      | 1,14 | No  |
| ENSMUSG00000040028 | 1,02E-01  | 6,33972564   | 2,62E+00  | 1,05E-01 | 3,97E-01 | Elavl1    | 1,07 | No  |
| ENSMUSG00000040029 | -1,81E-02 | 6,082231972  | 7,76E-02  | 7,81E-01 | 9,49E-01 | Ipo8      | 0,99 | No  |
| ENSMUSG00000040033 | 8,56E-02  | 6,709288632  | 1,94E+00  | 1,64E-01 | 5,15E-01 | Stat2     | 1,06 | No  |
| ENSMUSG00000040034 | 1,26E-01  | 2,485061491  | 9,49E-01  | 3,30E-01 | 6,30E-01 | Nup43     | 1,09 | No  |
| ENSMUSG00000040035 | -1,09E-02 | -2,896111597 | 8,93E-05  | 9,92E-01 | 1,00E+00 | Disp2     | 0,99 | No  |
| ENSMUSG00000040037 | 1,24E+00  | -2,49760993  | 9,48E-01  | 3,30E-01 | 6,31E-01 | Negr1     | 2,36 | No  |
| ENSMUSG00000040040 | 2,70E-01  | 1,769715567  | 2,79E+00  | 9,48E-02 | 3,86E-01 | Ift88     | 1,21 | No  |
| ENSMUSG00000040043 | 1,04E-01  | 3,571376239  | 1,11E+00  | 2,92E-01 | 5,87E-01 | Rbms2     | 1,07 | No  |
| ENSMUSG00000040044 | 3,04E-02  | 5,383447953  | 1,87E-01  | 6,65E-01 | 8,85E-01 | Orc3      | 1,02 | No  |
| ENSMUSG00000040048 | -1,24E-01 | 5,807521535  | 3,45E+00  | 6,31E-02 | 3,13E-01 | Ndufb10   | 0,92 | No  |
| ENSMUSG00000040054 | -7,28E-02 | 7,533097397  | 1,52E+00  | 2,18E-01 | 5,50E-01 | Baz2a     | 0,95 | No  |
| ENSMUSG00000040061 | 1,73E-01  | 8,642712098  | 9,15E+00  | 2,48E-03 | 3,32E-02 | Plcb2     | 1,13 | Yes |
| ENSMUSG00000040065 | -3,83E-02 | -3,107651936 | -7,91E-11 | 1,00E+00 | 1,00E+00 | Pfpl      | 0,97 | No  |
| ENSMUSG00000040078 | 1,32E-01  | 5,646092511  | 3,77E+00  | 5,21E-02 | 2,78E-01 | Ptges3-ps | 1,10 | No  |
| ENSMUSG00000040084 | 1,21E-01  | 6,033200469  | 3,44E+00  | 6,38E-02 | 3,16E-01 | Bub1b     | 1,09 | No  |
| ENSMUSG00000040086 | 3,40E-01  | -0,770729953 | 7,75E-01  | 3,79E-01 | 6,79E-01 | Tnni3k    | 1,27 | No  |
| ENSMUSG00000040093 | -4,44E-01 | 5,95929513   | 4,65E+01  | 9,37E-12 | 9,93E-10 | Bmf       | 0,74 | Yes |
| ENSMUSG00000040097 | -1,51E-01 | 4,44472299   | 3,43E+00  | 6,39E-02 | 3,16E-01 | Flywch1   | 0,90 | No  |
| ENSMUSG00000040102 | 2,04E-01  | 2,602859364  | 2,84E+00  | 9,20E-02 | 3,82E-01 | Klhl42    | 1,15 | No  |
| ENSMUSG00000040105 | 1,88E-02  | 3,763166774  | 4,00E-02  | 8,41E-01 | 9,84E-01 | Plpp6     | 1,01 | No  |
| ENSMUSG00000040111 | 5,12E-03  | 5,974684871  | 6,10E-03  | 9,38E-01 | 1,00E+00 | Gramd1b   | 1,00 | No  |
| ENSMUSG00000040112 | -7,33E-02 | 3,979643448  | 6,79E-01  | 4,10E-01 | 7,06E-01 | Mrps35    | 0,95 | No  |

|                    |           |              |          |          |          |               |       |     |
|--------------------|-----------|--------------|----------|----------|----------|---------------|-------|-----|
| ENSMUSG00000040118 | -1,86E+00 | -3,033612668 | 1,39E+00 | 2,38E-01 | 5,50E-01 | Cacna2d1      | 0,28  | No  |
| ENSMUSG00000040121 | 3,09E-01  | -2,033742072 | 1,75E-01 | 6,76E-01 | 8,91E-01 | Rep15         | 1,24  | No  |
| ENSMUSG00000040123 | -7,56E-02 | 5,33994934   | 1,17E+00 | 2,80E-01 | 5,77E-01 | Zmym5         | 0,95  | No  |
| ENSMUSG00000040124 | -8,43E-02 | 3,33092729   | 6,62E-01 | 4,16E-01 | 7,11E-01 | Gorab         | 0,94  | No  |
| ENSMUSG00000040128 | -1,08E-01 | 6,363343942  | 2,91E+00 | 8,82E-02 | 3,79E-01 | Pnrc1         | 0,93  | No  |
| ENSMUSG00000040132 | -1,94E+00 | -3,107619243 | 1,50E+00 | 2,21E-01 | 5,50E-01 | Svs2          | 0,26  | No  |
| ENSMUSG00000040133 | 1,09E-01  | 2,631167319  | 7,84E-01 | 3,76E-01 | 6,77E-01 | Gpr176        | 1,08  | No  |
| ENSMUSG00000040136 | -5,69E-01 | -2,600671505 | 2,54E-01 | 6,14E-01 | 8,53E-01 | Abcc8         | 0,67  | No  |
| ENSMUSG00000040139 | 4,91E-02  | 3,315628113  | 2,14E-01 | 6,43E-01 | 8,72E-01 | 9430038I01Rik | 1,03  | No  |
| ENSMUSG00000040140 | 3,52E+00  | -2,600715964 | 5,38E+00 | 2,04E-02 | 1,53E-01 | Tdrd6         | 11,48 | No  |
| ENSMUSG00000040146 | -3,14E-01 | 0,726779012  | 1,85E+00 | 1,74E-01 | 5,32E-01 | Rgl3          | 0,80  | No  |
| ENSMUSG00000040151 | 5,36E-02  | 5,29753007   | 5,69E-01 | 4,51E-01 | 7,41E-01 | Hs2st1        | 1,04  | No  |
| ENSMUSG00000040152 | -1,16E-01 | 10,11424913  | 4,25E+00 | 3,92E-02 | 2,35E-01 | Thbs1         | 0,92  | No  |
| ENSMUSG00000040158 | -1,21E-01 | 5,312601265  | 2,94E+00 | 8,63E-02 | 3,78E-01 | Tax1bp3       | 0,92  | No  |
| ENSMUSG00000040163 | 2,60E+00  | -2,963258458 | 2,63E+00 | 1,05E-01 | 3,97E-01 | 1700034J05Rik | 6,08  | No  |
| ENSMUSG00000040165 | 3,13E-01  | 6,289438746  | 2,38E+01 | 1,05E-06 | 4,62E-05 | Cd209c        | 1,24  | Yes |
| ENSMUSG00000040167 | 2,44E-01  | 3,48756715   | 6,02E+00 | 1,41E-02 | 1,21E-01 | Ikzf5         | 1,18  | No  |
| ENSMUSG00000040174 | 2,36E-02  | 4,093212155  | 7,37E-02 | 7,86E-01 | 9,52E-01 | Alkbh3        | 1,02  | No  |
| ENSMUSG00000040177 | 2,84E-01  | 3,23916561   | 7,15E+00 | 7,49E-03 | 7,54E-02 | 2310057M21Rik | 1,22  | No  |
| ENSMUSG00000040181 | -9,98E-01 | -2,401330623 | 1,21E+00 | 2,72E-01 | 5,69E-01 | Fmo1          | 0,50  | No  |
| ENSMUSG00000040183 | 2,84E-01  | -1,146113421 | 3,18E-01 | 5,73E-01 | 8,32E-01 | Ankrd6        | 1,22  | No  |
| ENSMUSG00000040187 | 1,24E-02  | 0,458269814  | 2,63E-03 | 9,59E-01 | 1,00E+00 | Arntl2        | 1,01  | No  |
| ENSMUSG00000040188 | -8,15E-02 | 7,264129969  | 1,86E+00 | 1,73E-01 | 5,30E-01 | Scamp2        | 0,95  | No  |
| ENSMUSG00000040189 | -2,08E-02 | 0,950627939  | 9,79E-03 | 9,21E-01 | 1,00E+00 | Ccdc114       | 0,99  | No  |
| ENSMUSG00000040195 | 3,63E-01  | 4,493162735  | 2,06E+01 | 5,74E-06 | 2,05E-04 | Nemp1         | 1,29  | Yes |
| ENSMUSG00000040197 | 8,34E-01  | 1,3790677    | 1,97E+01 | 9,12E-06 | 3,09E-04 | Cd209e        | 1,78  | Yes |
| ENSMUSG00000040204 | 2,46E-01  | 6,210368673  | 1,46E+01 | 1,35E-04 | 3,11E-03 | Pclaf         | 1,19  | Yes |
| ENSMUSG00000040205 | -3,19E+00 | -2,831909156 | 4,29E+00 | 3,82E-02 | 2,32E-01 | Cuzd1         | 0,11  | No  |
| ENSMUSG00000040209 | 8,12E-02  | 5,852783363  | 1,50E+00 | 2,21E-01 | 5,50E-01 | Zfp704        | 1,06  | No  |
| ENSMUSG00000040212 | 1,59E-01  | 6,894471478  | 6,80E+00 | 9,11E-03 | 8,71E-02 | Emp3          | 1,12  | No  |
| ENSMUSG00000040213 | 4,60E-02  | 2,307877555  | 1,14E-01 | 7,35E-01 | 9,24E-01 | Kyat3         | 1,03  | No  |
| ENSMUSG00000040219 | -6,45E-02 | 2,472371923  | 2,46E-01 | 6,20E-01 | 8,57E-01 | Ttc12         | 0,96  | No  |

|                    |           |              |          |          |          |          |      |     |
|--------------------|-----------|--------------|----------|----------|----------|----------|------|-----|
| ENSMUSG00000040220 | -7,80E-02 | 3,516992662  | 6,19E-01 | 4,31E-01 | 7,25E-01 | Gas8     | 0,95 | No  |
| ENSMUSG00000040225 | 6,15E-02  | 8,401276104  | 1,14E+00 | 2,85E-01 | 5,81E-01 | Prrc2c   | 1,04 | No  |
| ENSMUSG00000040231 | 1,13E-01  | -1,355449353 | 5,39E-02 | 8,16E-01 | 9,69E-01 | Syngn4   | 1,08 | No  |
| ENSMUSG00000040234 | 9,26E-02  | 4,779149746  | 1,45E+00 | 2,29E-01 | 5,50E-01 | Tm7sf3   | 1,07 | No  |
| ENSMUSG00000040236 | 1,81E-01  | 4,798920001  | 5,68E+00 | 1,71E-02 | 1,37E-01 | Trappc5  | 1,13 | No  |
| ENSMUSG00000040242 | 1,08E-01  | 6,353293066  | 2,91E+00 | 8,80E-02 | 3,79E-01 | Fgfr1op2 | 1,08 | No  |
| ENSMUSG00000040247 | -5,01E-01 | 3,412249797  | 2,54E+01 | 4,61E-07 | 2,22E-05 | Tbc1d10c | 0,71 | Yes |
| ENSMUSG00000040249 | 2,64E-01  | 10,10218345  | 2,19E+01 | 2,86E-06 | 1,11E-04 | Lrp1     | 1,20 | Yes |
| ENSMUSG00000040250 | -3,87E-04 | 4,320902882  | 2,18E-05 | 9,96E-01 | 1,00E+00 | Ints13   | 1,00 | No  |
| ENSMUSG00000040253 | 1,38E-01  | 6,755787225  | 5,01E+00 | 2,52E-02 | 1,76E-01 | Gbp7     | 1,10 | No  |
| ENSMUSG00000040254 | -8,02E-01 | -1,497527953 | 2,69E+00 | 1,01E-01 | 3,92E-01 | Sema3d   | 0,57 | No  |
| ENSMUSG00000040258 | 3,09E+00  | -2,896194806 | 3,89E+00 | 4,86E-02 | 2,65E-01 | Nxph4    | 8,51 | No  |
| ENSMUSG00000040260 | 5,99E-02  | 2,17013927   | 1,78E-01 | 6,73E-01 | 8,90E-01 | Daam2    | 1,04 | No  |
| ENSMUSG00000040263 | 1,66E-01  | 6,304222732  | 6,73E+00 | 9,50E-03 | 8,98E-02 | Klhdc4   | 1,12 | No  |
| ENSMUSG00000040264 | -1,96E-01 | 1,970219955  | 1,66E+00 | 1,97E-01 | 5,50E-01 | Gbp2b    | 0,87 | No  |
| ENSMUSG00000040265 | -5,55E-01 | -0,998017047 | 1,74E+00 | 1,87E-01 | 5,50E-01 | Dnm3     | 0,68 | No  |
| ENSMUSG00000040268 | -1,14E-01 | 7,275658232  | 3,66E+00 | 5,57E-02 | 2,89E-01 | Plekha1  | 0,92 | No  |
| ENSMUSG00000040269 | 5,82E-03  | 3,406915784  | 3,20E-03 | 9,55E-01 | 1,00E+00 | Mrps28   | 1,00 | No  |
| ENSMUSG00000040270 | 3,21E-02  | 0,816850219  | 2,04E-02 | 8,87E-01 | 1,00E+00 | Bach2    | 1,02 | No  |
| ENSMUSG00000040272 | 2,17E-01  | 3,683904259  | 5,31E+00 | 2,12E-02 | 1,57E-01 | Accs     | 1,16 | No  |
| ENSMUSG00000040274 | -3,50E-01 | 7,09644569   | 3,36E+01 | 6,63E-09 | 4,77E-07 | Cdk6     | 0,78 | Yes |
| ENSMUSG00000040276 | -3,25E-01 | 3,905196629  | 1,32E+01 | 2,82E-04 | 5,77E-03 | Pacsin1  | 0,80 | Yes |
| ENSMUSG00000040280 | 2,97E-01  | -2,740908592 | 5,39E-02 | 8,16E-01 | 9,69E-01 | Ndufa4l2 | 1,23 | No  |
| ENSMUSG00000040282 | 9,95E-02  | 2,506465657  | 5,78E-01 | 4,47E-01 | 7,38E-01 | BC052040 | 1,07 | No  |
| ENSMUSG00000040283 | 6,47E-01  | -1,801111825 | 1,23E+00 | 2,67E-01 | 5,64E-01 | Btnl9    | 1,57 | No  |
| ENSMUSG00000040287 | -2,58E-02 | 0,259125401  | 9,73E-03 | 9,21E-01 | 1,00E+00 | Stac3    | 0,98 | No  |
| ENSMUSG00000040289 | -1,04E+00 | -0,289200171 | 1,01E+01 | 1,45E-03 | 2,18E-02 | Hey1     | 0,49 | Yes |
| ENSMUSG00000040296 | -1,61E-01 | 5,043358389  | 4,84E+00 | 2,77E-02 | 1,88E-01 | Ddx58    | 0,89 | No  |
| ENSMUSG00000040297 | -1,96E-01 | 5,459625868  | 7,92E+00 | 4,89E-03 | 5,51E-02 | Suco     | 0,87 | No  |
| ENSMUSG00000040298 | 1,20E-01  | -1,378238822 | 5,37E-02 | 8,17E-01 | 9,69E-01 | Btbd16   | 1,09 | No  |
| ENSMUSG00000040302 | -5,02E-02 | 3,130607205  | 2,11E-01 | 6,46E-01 | 8,74E-01 | Rbm48    | 0,97 | No  |
| ENSMUSG00000040310 | 1,84E+00  | -3,033632273 | 1,33E+00 | 2,49E-01 | 5,50E-01 | Alx4     | 3,58 | No  |

|                    |           |              |          |          |          |          |      |     |
|--------------------|-----------|--------------|----------|----------|----------|----------|------|-----|
| ENSMUSG00000040312 | 6,93E-03  | 3,787639543  | 5,60E-03 | 9,40E-01 | 1,00E+00 | Cchcr1   | 1,00 | No  |
| ENSMUSG00000040314 | -8,80E-02 | -2,896116238 | 3,33E-03 | 9,54E-01 | 1,00E+00 | Ctsg     | 0,94 | No  |
| ENSMUSG00000040321 | -2,63E-01 | 3,405722506  | 6,78E+00 | 9,24E-03 | 8,81E-02 | Zfp770   | 0,83 | No  |
| ENSMUSG00000040322 | 2,04E-01  | 6,490030359  | 1,05E+01 | 1,19E-03 | 1,88E-02 | Slc25a24 | 1,15 | Yes |
| ENSMUSG00000040323 | 1,22E-01  | 6,452704042  | 3,71E+00 | 5,40E-02 | 2,84E-01 | Gm15429  | 1,09 | No  |
| ENSMUSG00000040325 | -3,91E-02 | 4,954889269  | 2,78E-01 | 5,98E-01 | 8,45E-01 | Vprbp    | 0,97 | No  |
| ENSMUSG00000040327 | -2,00E-01 | 4,916456212  | 7,16E+00 | 7,46E-03 | 7,51E-02 | Cul9     | 0,87 | No  |
| ENSMUSG00000040328 | -5,80E-01 | 0,731939334  | 6,66E+00 | 9,85E-03 | 9,22E-02 | Olfir56  | 0,67 | No  |
| ENSMUSG00000040329 | -5,43E-02 | 0,578098361  | 5,23E-02 | 8,19E-01 | 9,71E-01 | Il7      | 0,96 | No  |
| ENSMUSG00000040331 | 3,65E-02  | 4,69306137   | 2,23E-01 | 6,37E-01 | 8,68E-01 | Nsmce4a  | 1,03 | No  |
| ENSMUSG00000040339 | -5,77E-02 | 5,863803439  | 7,50E-01 | 3,86E-01 | 6,87E-01 | Fam102b  | 0,96 | No  |
| ENSMUSG00000040340 | 8,05E-01  | -2,548287214 | 5,63E-01 | 4,53E-01 | 7,43E-01 | Tex45    | 1,75 | No  |
| ENSMUSG00000040345 | 9,17E-02  | 6,731078307  | 2,21E+00 | 1,38E-01 | 4,68E-01 | Arhgap9  | 1,07 | No  |
| ENSMUSG00000040350 | -3,46E-01 | 5,634130341  | 2,64E+01 | 2,80E-07 | 1,41E-05 | Trim7    | 0,79 | Yes |
| ENSMUSG00000040351 | -7,57E-02 | 6,311251685  | 1,42E+00 | 2,33E-01 | 5,50E-01 | Ankib1   | 0,95 | No  |
| ENSMUSG00000040354 | 1,51E-02  | 5,633039821  | 4,93E-02 | 8,24E-01 | 9,73E-01 | Mars     | 1,01 | No  |
| ENSMUSG00000040356 | -4,36E-02 | 6,564581925  | 4,89E-01 | 4,84E-01 | 7,72E-01 | Skiv2l   | 0,97 | No  |
| ENSMUSG00000040359 | 1,17E-01  | 4,467283512  | 2,07E+00 | 1,50E-01 | 4,91E-01 | Ufl1     | 1,08 | No  |
| ENSMUSG00000040364 | -1,31E+00 | -2,800961615 | 1,07E+00 | 3,00E-01 | 5,97E-01 | Sec1     | 0,40 | No  |
| ENSMUSG00000040365 | 6,65E-02  | 5,949036273  | 1,02E+00 | 3,11E-01 | 6,11E-01 | Trim41   | 1,05 | No  |
| ENSMUSG00000040367 | -5,05E-01 | -2,333260509 | 3,35E-01 | 5,63E-01 | 8,26E-01 | Lrrd1    | 0,70 | No  |
| ENSMUSG00000040370 | -1,20E-01 | 4,492121994  | 2,25E+00 | 1,34E-01 | 4,60E-01 | Etfrf1   | 0,92 | No  |
| ENSMUSG00000040372 | -1,87E+00 | -3,107637761 | 1,39E+00 | 2,38E-01 | 5,50E-01 | Gpr63    | 0,27 | No  |
| ENSMUSG00000040374 | 4,93E-02  | 4,902252404  | 4,25E-01 | 5,14E-01 | 7,96E-01 | Pex2     | 1,03 | No  |
| ENSMUSG00000040380 | -8,03E-01 | -1,247093946 | 3,29E+00 | 6,95E-02 | 3,32E-01 | Cbln3    | 0,57 | No  |
| ENSMUSG00000040383 | 8,79E-02  | 6,096192515  | 1,84E+00 | 1,75E-01 | 5,33E-01 | Aqr      | 1,06 | No  |
| ENSMUSG00000040385 | -2,07E-02 | 8,663658831  | 1,30E-01 | 7,18E-01 | 9,15E-01 | Ppp1ca   | 0,99 | No  |
| ENSMUSG00000040387 | 3,63E-01  | -1,614233135 | 3,88E-01 | 5,33E-01 | 8,06E-01 | Klhl32   | 1,29 | No  |
| ENSMUSG00000040389 | 2,49E-02  | 4,306454268  | 9,05E-02 | 7,64E-01 | 9,39E-01 | Wdr47    | 1,02 | No  |
| ENSMUSG00000040390 | -1,65E-01 | 4,271625012  | 3,90E+00 | 4,83E-02 | 2,64E-01 | Map3k10  | 0,89 | No  |
| ENSMUSG00000040396 | 1,01E-01  | 5,408708794  | 2,07E+00 | 1,50E-01 | 4,91E-01 | Abhd13   | 1,07 | No  |
| ENSMUSG00000040405 | -1,88E+00 | -2,448649814 | 4,13E+00 | 4,21E-02 | 2,44E-01 | Havcr1   | 0,27 | No  |

|                    |           |              |          |          |          |               |       |     |
|--------------------|-----------|--------------|----------|----------|----------|---------------|-------|-----|
| ENSMUSG00000040407 | -1,10E-01 | 6,664080663  | 3,17E+00 | 7,51E-02 | 3,49E-01 | Akap9         | 0,93  | No  |
| ENSMUSG00000040410 | -6,55E-02 | 2,353715552  | 2,36E-01 | 6,27E-01 | 8,61E-01 | Fbxl4         | 0,96  | No  |
| ENSMUSG00000040412 | -1,30E+00 | -2,185644543 | 2,87E+00 | 9,05E-02 | 3,81E-01 | 5330417C22Rik | 0,41  | No  |
| ENSMUSG00000040413 | -1,93E+00 | -2,963244023 | 1,47E+00 | 2,25E-01 | 5,50E-01 | Timd2         | 0,26  | No  |
| ENSMUSG00000040414 | -3,02E-02 | 4,239737152  | 1,27E-01 | 7,21E-01 | 9,16E-01 | Slc25a28      | 0,98  | No  |
| ENSMUSG00000040415 | -1,45E-01 | 6,450561343  | 5,30E+00 | 2,14E-02 | 1,58E-01 | Dtx3          | 0,90  | No  |
| ENSMUSG00000040423 | 1,08E-01  | 6,504267894  | 2,99E+00 | 8,39E-02 | 3,71E-01 | Rc3h1         | 1,08  | No  |
| ENSMUSG00000040424 | -5,33E-02 | -2,033578303 | 3,97E-03 | 9,50E-01 | 1,00E+00 | Hipk4         | 0,96  | No  |
| ENSMUSG00000040428 | 9,64E-01  | -0,30602183  | 8,53E+00 | 3,50E-03 | 4,29E-02 | Plekha4       | 1,95  | Yes |
| ENSMUSG00000040429 | -1,90E-01 | 1,104064198  | 8,66E-01 | 3,52E-01 | 6,53E-01 | Mterf1a       | 0,88  | No  |
| ENSMUSG00000040430 | 7,14E-02  | 4,329558309  | 7,29E-01 | 3,93E-01 | 6,93E-01 | Pitpnc1       | 1,05  | No  |
| ENSMUSG00000040432 | 3,35E-01  | -0,989495213 | 5,26E-01 | 4,68E-01 | 7,56E-01 | Ltb4r2        | 1,26  | No  |
| ENSMUSG00000040433 | 4,24E-02  | 5,160586567  | 3,52E-01 | 5,53E-01 | 8,19E-01 | Zbtb38        | 1,03  | No  |
| ENSMUSG00000040434 | -5,31E-02 | -2,246972669 | 4,23E-03 | 9,48E-01 | 1,00E+00 | Large2        | 0,96  | No  |
| ENSMUSG00000040435 | -1,97E-01 | 6,624659803  | 1,02E+01 | 1,43E-03 | 2,15E-02 | Ppp1r15a      | 0,87  | Yes |
| ENSMUSG00000040441 | -2,18E-01 | 5,616164755  | 1,03E+01 | 1,35E-03 | 2,06E-02 | Slc26a10      | 0,86  | Yes |
| ENSMUSG00000040446 | 3,33E-02  | 4,546156535  | 1,73E-01 | 6,77E-01 | 8,92E-01 | Rprd1a        | 1,02  | No  |
| ENSMUSG00000040447 | -5,32E-02 | 0,799381199  | 5,46E-02 | 8,15E-01 | 9,69E-01 | Spns2         | 0,96  | No  |
| ENSMUSG00000040451 | 1,61E-02  | 5,972467773  | 5,96E-02 | 8,07E-01 | 9,64E-01 | Sgms1         | 1,01  | No  |
| ENSMUSG00000040455 | 2,15E-01  | 5,310451006  | 9,22E+00 | 2,39E-03 | 3,23E-02 | Usp45         | 1,16  | Yes |
| ENSMUSG00000040459 | -1,77E-01 | 6,886525706  | 8,43E+00 | 3,70E-03 | 4,47E-02 | Arglu1        | 0,88  | Yes |
| ENSMUSG00000040462 | -4,19E-02 | 7,304777279  | 4,91E-01 | 4,84E-01 | 7,71E-01 | Os9           | 0,97  | No  |
| ENSMUSG00000040463 | 4,82E-02  | 6,904543167  | 6,22E-01 | 4,30E-01 | 7,24E-01 | Mybbp1a       | 1,03  | No  |
| ENSMUSG00000040464 | 1,25E-01  | 3,176891604  | 1,32E+00 | 2,51E-01 | 5,50E-01 | Gtpbp10       | 1,09  | No  |
| ENSMUSG00000040466 | 1,69E-01  | 6,460812643  | 7,12E+00 | 7,63E-03 | 7,64E-02 | Blvrb         | 1,12  | No  |
| ENSMUSG00000040467 | -8,48E-01 | -2,83197049  | 3,94E-01 | 5,30E-01 | 8,05E-01 | 4921522P10Rik | 0,56  | No  |
| ENSMUSG00000040471 | 1,85E+00  | -3,107657832 | 1,35E+00 | 2,46E-01 | 5,50E-01 | Ggt6          | 3,61  | No  |
| ENSMUSG00000040472 | 1,07E-01  | 4,003685883  | 1,43E+00 | 2,32E-01 | 5,50E-01 | Rabggta       | 1,08  | No  |
| ENSMUSG00000040473 | 3,77E+00  | -2,832085847 | 6,53E+00 | 1,06E-02 | 9,77E-02 | Cfap69        | 13,62 | No  |
| ENSMUSG00000040478 | 1,83E+00  | -2,831994072 | 1,32E+00 | 2,50E-01 | 5,50E-01 | Prdm13        | 3,55  | No  |
| ENSMUSG00000040479 | 1,78E-01  | 7,022672297  | 8,62E+00 | 3,33E-03 | 4,14E-02 | Dgkz          | 1,13  | Yes |
| ENSMUSG00000040481 | 3,95E-02  | 7,042279255  | 4,25E-01 | 5,14E-01 | 7,96E-01 | Bptf          | 1,03  | No  |



|                    |           |              |           |          |          |         |  |      |     |
|--------------------|-----------|--------------|-----------|----------|----------|---------|--|------|-----|
| ENSMUSG00000040482 | 8,63E-02  | 4,479254612  | 1,15E+00  | 2,84E-01 | 5,80E-01 | Dxo     |  | 1,06 | No  |
| ENSMUSG00000040483 | -9,10E-02 | 3,727000557  | 9,41E-01  | 3,32E-01 | 6,32E-01 | Xaf1    |  | 0,94 | No  |
| ENSMUSG00000040488 | -7,14E-02 | -1,711793972 | 1,19E-02  | 9,13E-01 | 1,00E+00 | Ltbp4   |  | 0,95 | No  |
| ENSMUSG00000040489 | -6,81E-02 | -2,896149338 | 3,18E-03  | 9,55E-01 | 1,00E+00 | Sox30   |  | 0,95 | No  |
| ENSMUSG00000040490 | 1,87E+00  | -3,107639691 | 1,38E+00  | 2,40E-01 | 5,50E-01 | Lrfn2   |  | 3,67 | No  |
| ENSMUSG00000040495 | 2,26E-01  | -1,896197535 | 1,18E-01  | 7,31E-01 | 9,22E-01 | Chrm4   |  | 1,17 | No  |
| ENSMUSG00000040498 | -1,01E+00 | -2,070060498 | 2,27E+00  | 1,32E-01 | 4,56E-01 | Igsf23  |  | 0,50 | No  |
| ENSMUSG00000040502 | -1,32E-01 | 1,310240218  | 4,80E-01  | 4,89E-01 | 7,76E-01 | March9  |  | 0,91 | No  |
| ENSMUSG00000040505 | 3,14E-02  | -3,107617333 | -7,69E-10 | 1,00E+00 | 1,00E+00 | Abcg5   |  | 1,02 | No  |
| ENSMUSG00000040506 | -3,79E-02 | 5,593089957  | 3,07E-01  | 5,79E-01 | 8,36E-01 | Ambra1  |  | 0,97 | No  |
| ENSMUSG00000040511 | -2,05E-01 | 4,729189752  | 6,94E+00  | 8,41E-03 | 8,23E-02 | Pvr     |  | 0,87 | No  |
| ENSMUSG00000040520 | 2,17E-01  | 4,848145095  | 8,06E+00  | 4,53E-03 | 5,18E-02 | Manea   |  | 1,16 | No  |
| ENSMUSG00000040521 | 7,05E-02  | 3,869353155  | 6,04E-01  | 4,37E-01 | 7,30E-01 | Tsfm    |  | 1,05 | No  |
| ENSMUSG00000040524 | -1,46E-02 | 6,206636093  | 5,19E-02  | 8,20E-01 | 9,71E-01 | Zfp609  |  | 0,99 | No  |
| ENSMUSG00000040525 | -1,90E+00 | -3,033594154 | 1,44E+00  | 2,30E-01 | 5,50E-01 | Cblc    |  | 0,27 | No  |
| ENSMUSG00000040528 | 1,51E-01  | 5,201565297  | 4,41E+00  | 3,56E-02 | 2,24E-01 | Milr1   |  | 1,11 | No  |
| ENSMUSG00000040532 | -7,76E-02 | 4,148592236  | 8,07E-01  | 3,69E-01 | 6,70E-01 | Abhd11  |  | 0,95 | No  |
| ENSMUSG00000040533 | -2,87E-01 | -0,175644563 | 8,16E-01  | 3,66E-01 | 6,67E-01 | Matn1   |  | 0,82 | No  |
| ENSMUSG00000040536 | 1,85E+00  | -3,107657832 | 1,35E+00  | 2,46E-01 | 5,50E-01 | Necab1  |  | 3,61 | No  |
| ENSMUSG00000040537 | 7,88E-02  | 1,280860602  | 1,76E-01  | 6,75E-01 | 8,91E-01 | Adam22  |  | 1,06 | No  |
| ENSMUSG00000040540 | 4,08E-02  | 5,591914125  | 3,57E-01  | 5,50E-01 | 8,17E-01 | Gm9770  |  | 1,03 | No  |
| ENSMUSG00000040543 | -8,61E-01 | -2,89612532  | 4,07E-01  | 5,24E-01 | 8,01E-01 | Pitpnm3 |  | 0,55 | No  |
| ENSMUSG00000040548 | 2,06E-01  | 6,024461558  | 9,87E+00  | 1,68E-03 | 2,43E-02 | Tex2    |  | 1,15 | Yes |
| ENSMUSG00000040549 | 8,82E-02  | 6,799721309  | 2,06E+00  | 1,51E-01 | 4,93E-01 | Ckap5   |  | 1,06 | No  |
| ENSMUSG00000040550 | 1,42E-01  | 5,271382889  | 4,00E+00  | 4,56E-02 | 2,55E-01 | Otud6b  |  | 1,10 | No  |
| ENSMUSG00000040552 | 1,58E-01  | 7,058913032  | 6,74E+00  | 9,42E-03 | 8,93E-02 | C3ar1   |  | 1,12 | No  |
| ENSMUSG00000040554 | 2,41E-01  | -0,491318818 | 4,74E-01  | 4,91E-01 | 7,77E-01 | Aipl1   |  | 1,18 | No  |
| ENSMUSG00000040557 | -8,94E-02 | 2,825616927  | 5,96E-01  | 4,40E-01 | 7,32E-01 | Mettl27 |  | 0,94 | No  |
| ENSMUSG00000040560 | 1,31E-01  | 6,394965669  | 4,29E+00  | 3,84E-02 | 2,33E-01 | Wdr7    |  | 1,10 | No  |
| ENSMUSG00000040562 | -2,84E-01 | 2,092193115  | 3,77E+00  | 5,23E-02 | 2,78E-01 | Gstm2   |  | 0,82 | No  |
| ENSMUSG00000040563 | -5,63E-02 | 1,01081783   | 7,51E-02  | 7,84E-01 | 9,51E-01 | Plppr2  |  | 0,96 | No  |
| ENSMUSG00000040564 | -1,94E+00 | -3,107619243 | 1,50E+00  | 2,21E-01 | 5,50E-01 | Apoc1   |  | 0,26 | No  |

|                    |           |              |          |          |          |               |      |     |
|--------------------|-----------|--------------|----------|----------|----------|---------------|------|-----|
| ENSMUSG00000040565 | 5,31E-02  | 6,508159622  | 7,16E-01 | 3,97E-01 | 6,98E-01 | Btaf1         | 1,04 | No  |
| ENSMUSG00000040569 | -1,89E+00 | -3,1076441   | 1,42E+00 | 2,33E-01 | 5,50E-01 | Slc26a7       | 0,27 | No  |
| ENSMUSG00000040570 | -1,12E-01 | -0,800924337 | 8,02E-02 | 7,77E-01 | 9,46E-01 | Rundc3b       | 0,93 | No  |
| ENSMUSG00000040583 | 1,87E+00  | -3,107639691 | 1,38E+00 | 2,40E-01 | 5,50E-01 | Cyp2b13       | 3,67 | No  |
| ENSMUSG00000040584 | 1,51E-01  | 0,785465556  | 4,76E-01 | 4,90E-01 | 7,76E-01 | Abcb1a        | 1,11 | No  |
| ENSMUSG00000040591 | -5,25E-02 | 5,265865837  | 5,46E-01 | 4,60E-01 | 7,49E-01 | 1110051M20Rik | 0,96 | No  |
| ENSMUSG00000040592 | -1,17E+00 | -1,268043724 | 5,08E+00 | 2,42E-02 | 1,71E-01 | Cd79b         | 0,44 | No  |
| ENSMUSG00000040594 | 6,39E-01  | -1,711745438 | 1,20E+00 | 2,73E-01 | 5,69E-01 | Ranbp17       | 1,56 | No  |
| ENSMUSG00000040596 | -1,42E-01 | 5,376075588  | 4,14E+00 | 4,18E-02 | 2,43E-01 | Pogk          | 0,91 | No  |
| ENSMUSG00000040599 | 2,00E-01  | 5,192652516  | 7,86E+00 | 5,05E-03 | 5,63E-02 | Mis12         | 1,15 | No  |
| ENSMUSG00000040600 | 4,64E-01  | -1,641328372 | 5,68E-01 | 4,51E-01 | 7,41E-01 | Eps8l3        | 1,38 | No  |
| ENSMUSG00000040605 | -1,19E+00 | -0,6550362   | 1,02E+01 | 1,44E-03 | 2,16E-02 | Bace2         | 0,44 | Yes |
| ENSMUSG00000040606 | 3,49E-01  | 4,059367564  | 1,54E+01 | 8,88E-05 | 2,20E-03 | Kazn          | 1,27 | Yes |
| ENSMUSG00000040612 | -4,90E-01 | -2,929309566 | 1,21E-01 | 7,28E-01 | 9,20E-01 | lldr2         | 0,71 | No  |
| ENSMUSG00000040613 | -5,84E-02 | 5,605123162  | 7,35E-01 | 3,91E-01 | 6,91E-01 | Apobec1       | 0,96 | No  |
| ENSMUSG00000040616 | -2,72E-01 | 4,016651225  | 9,67E+00 | 1,87E-03 | 2,65E-02 | Tmem51        | 0,83 | Yes |
| ENSMUSG00000040618 | 1,61E-01  | 4,288720181  | 3,72E+00 | 5,38E-02 | 2,84E-01 | Pck2          | 1,12 | No  |
| ENSMUSG00000040620 | 4,41E-02  | 5,609502836  | 4,20E-01 | 5,17E-01 | 7,98E-01 | Dhx33         | 1,03 | No  |
| ENSMUSG00000040624 | -2,80E-01 | 6,195224228  | 1,89E+01 | 1,35E-05 | 4,38E-04 | Plekhg1       | 0,82 | Yes |
| ENSMUSG00000040627 | -5,12E-02 | -2,683172903 | 1,80E-03 | 9,66E-01 | 1,00E+00 | Aicda         | 0,97 | No  |
| ENSMUSG00000040631 | 7,22E-02  | 2,700624128  | 3,43E-01 | 5,58E-01 | 8,22E-01 | Dok4          | 1,05 | No  |
| ENSMUSG00000040632 | -1,94E+00 | -3,107619243 | 1,50E+00 | 2,21E-01 | 5,50E-01 | Nrl           | 0,26 | No  |
| ENSMUSG00000040640 | -2,83E-02 | -0,195608956 | 7,36E-03 | 9,32E-01 | 1,00E+00 | Erc2          | 0,98 | No  |
| ENSMUSG00000040648 | 1,67E-01  | 5,199208284  | 5,43E+00 | 1,97E-02 | 1,50E-01 | Ppip5k2       | 1,12 | No  |
| ENSMUSG00000040649 | -1,94E+00 | -3,107619243 | 1,50E+00 | 2,21E-01 | 5,50E-01 | Rimklb        | 0,26 | No  |
| ENSMUSG00000040651 | -1,05E-01 | 4,485735207  | 1,75E+00 | 1,86E-01 | 5,50E-01 | Fam208a       | 0,93 | No  |
| ENSMUSG00000040652 | -1,21E-01 | 4,2688929    | 2,05E+00 | 1,52E-01 | 4,94E-01 | Oaz2          | 0,92 | No  |
| ENSMUSG00000040653 | -2,66E+00 | -3,033639428 | 2,81E+00 | 9,35E-02 | 3,83E-01 | Ppp1r14c      | 0,16 | No  |
| ENSMUSG00000040658 | -4,14E-02 | 2,270227981  | 8,56E-02 | 7,70E-01 | 9,42E-01 | Dnph1         | 0,97 | No  |
| ENSMUSG00000040659 | 1,38E-02  | 8,719245385  | 5,83E-02 | 8,09E-01 | 9,65E-01 | Efhd2         | 1,01 | No  |
| ENSMUSG00000040661 | 1,31E-02  | 6,261515902  | 4,20E-02 | 8,38E-01 | 9,82E-01 | Rad54l2       | 1,01 | No  |
| ENSMUSG00000040663 | 3,91E-01  | 4,359157035  | 2,21E+01 | 2,64E-06 | 1,03E-04 | Clcf1         | 1,31 | Yes |

|                    |           |              |          |          |          |               |      |     |
|--------------------|-----------|--------------|----------|----------|----------|---------------|------|-----|
| ENSMUSG00000040666 | -7,38E-02 | -3,033659033 | 2,66E-03 | 9,59E-01 | 1,00E+00 | Sh3bgr        | 0,95 | No  |
| ENSMUSG00000040667 | -1,42E-01 | 6,320315295  | 5,04E+00 | 2,47E-02 | 1,74E-01 | Nup88         | 0,91 | No  |
| ENSMUSG00000040669 | -2,88E-01 | 3,934356671  | 1,03E+01 | 1,35E-03 | 2,06E-02 | Phc1          | 0,82 | Yes |
| ENSMUSG00000040675 | 3,55E-01  | 4,069882124  | 1,63E+01 | 5,28E-05 | 1,42E-03 | Mthfd1l       | 1,28 | Yes |
| ENSMUSG00000040680 | 5,22E-01  | -0,697189062 | 1,63E+00 | 2,02E-01 | 5,50E-01 | Kremen2       | 1,44 | No  |
| ENSMUSG00000040681 | 8,62E-02  | 5,171919607  | 1,42E+00 | 2,33E-01 | 5,50E-01 | Hmgn1         | 1,06 | No  |
| ENSMUSG00000040687 | 3,79E-02  | 6,057337029  | 3,40E-01 | 5,60E-01 | 8,23E-01 | Madd          | 1,03 | No  |
| ENSMUSG00000040688 | 5,82E-02  | 4,856203667  | 5,88E-01 | 4,43E-01 | 7,35E-01 | Tbl3          | 1,04 | No  |
| ENSMUSG00000040690 | -1,58E-02 | -2,831999518 | 1,41E-04 | 9,91E-01 | 1,00E+00 | Col16a1       | 0,99 | No  |
| ENSMUSG00000040693 | -2,05E-01 | -2,185553202 | 9,17E-02 | 7,62E-01 | 9,38E-01 | Slco4c1       | 0,87 | No  |
| ENSMUSG00000040694 | 2,37E-01  | -1,929274673 | 1,30E-01 | 7,19E-01 | 9,15E-01 | Apobec2       | 1,18 | No  |
| ENSMUSG00000040697 | 1,66E-01  | 5,420259357  | 5,70E+00 | 1,69E-02 | 1,36E-01 | Dnajc16       | 1,12 | No  |
| ENSMUSG00000040699 | -3,21E-01 | 5,384086593  | 2,11E+01 | 4,46E-06 | 1,64E-04 | Limd2         | 0,80 | Yes |
| ENSMUSG00000040701 | -3,59E-02 | 5,533557583  | 2,72E-01 | 6,02E-01 | 8,48E-01 | Ap1g2         | 0,98 | No  |
| ENSMUSG00000040703 | 1,17E-01  | 2,375023266  | 7,65E-01 | 3,82E-01 | 6,83E-01 | Cyp2s1        | 1,08 | No  |
| ENSMUSG00000040705 | -9,31E-02 | -0,87178677  | 5,01E-02 | 8,23E-01 | 9,73E-01 | A930016O22Rik | 0,94 | No  |
| ENSMUSG00000040706 | -1,85E+00 | -2,96319884  | 1,39E+00 | 2,38E-01 | 5,50E-01 | Agmat         | 0,28 | No  |
| ENSMUSG00000040710 | -4,55E-01 | 6,578605334  | 5,41E+01 | 1,92E-13 | 2,55E-11 | St8sia4       | 0,73 | Yes |
| ENSMUSG00000040711 | 2,15E-01  | 9,378536801  | 1,44E+01 | 1,45E-04 | 3,29E-03 | Sh3pxd2b      | 1,16 | Yes |
| ENSMUSG00000040712 | 5,14E-02  | 7,069085675  | 7,24E-01 | 3,95E-01 | 6,95E-01 | Camta2        | 1,04 | No  |
| ENSMUSG00000040713 | 1,22E-01  | 8,266234732  | 4,45E+00 | 3,48E-02 | 2,20E-01 | Creg1         | 1,09 | No  |
| ENSMUSG00000040714 | -9,08E-02 | 2,8928822    | 6,14E-01 | 4,33E-01 | 7,27E-01 | Klc3          | 0,94 | No  |
| ENSMUSG00000040715 | 1,06E-01  | 4,983772331  | 2,04E+00 | 1,53E-01 | 4,96E-01 | Rsc1a1        | 1,08 | No  |
| ENSMUSG00000040717 | -4,63E-01 | -2,311205765 | 3,94E-01 | 5,30E-01 | 8,05E-01 | Il17rd        | 0,73 | No  |
| ENSMUSG00000040720 | 8,09E-03  | 6,52399711   | 1,68E-02 | 8,97E-01 | 1,00E+00 | Virma         | 1,01 | No  |
| ENSMUSG00000040721 | 8,47E-03  | 4,251822549  | 1,01E-02 | 9,20E-01 | 1,00E+00 | Zfhx2         | 1,01 | No  |
| ENSMUSG00000040722 | 2,56E-01  | 5,025642376  | 1,19E+01 | 5,69E-04 | 1,02E-02 | Scamp5        | 1,19 | Yes |
| ENSMUSG00000040723 | -2,73E-01 | 5,48834007   | 1,58E+01 | 7,13E-05 | 1,82E-03 | Rcsd1         | 0,83 | Yes |
| ENSMUSG00000040724 | 5,86E-02  | -1,47301487  | 1,00E-02 | 9,20E-01 | 1,00E+00 | Kcna2         | 1,04 | No  |
| ENSMUSG00000040725 | 4,23E-02  | 8,006978922  | 5,29E-01 | 4,67E-01 | 7,55E-01 | Hnrnpul1      | 1,03 | No  |
| ENSMUSG00000040726 | 2,60E+00  | -2,896177956 | 2,63E+00 | 1,05E-01 | 3,97E-01 | Hesx1         | 6,08 | No  |
| ENSMUSG00000040728 | -7,35E-02 | -2,770561087 | 3,66E-03 | 9,52E-01 | 1,00E+00 | Esrp1         | 0,95 | No  |

|                    |           |              |          |          |          |               |      |     |
|--------------------|-----------|--------------|----------|----------|----------|---------------|------|-----|
| ENSMUSG00000040729 | -7,24E-01 | 1,079514031  | 1,40E+01 | 1,79E-04 | 3,96E-03 | Cep126        | 0,61 | Yes |
| ENSMUSG00000040731 | -5,37E-02 | 8,121027562  | 8,57E-01 | 3,55E-01 | 6,56E-01 | Eif4h         | 0,96 | No  |
| ENSMUSG00000040732 | -2,27E+00 | -2,548196127 | 4,20E+00 | 4,04E-02 | 2,38E-01 | Erg           | 0,21 | No  |
| ENSMUSG00000040734 | 3,50E-01  | 2,741573724  | 8,38E+00 | 3,80E-03 | 4,56E-02 | Ppp1r13l      | 1,27 | Yes |
| ENSMUSG00000040738 | -3,95E-02 | 4,591884285  | 2,48E-01 | 6,19E-01 | 8,56E-01 | Ints8         | 0,97 | No  |
| ENSMUSG00000040740 | -7,50E-01 | -1,37829227  | 1,99E+00 | 1,59E-01 | 5,06E-01 | Slc25a34      | 0,59 | No  |
| ENSMUSG00000040746 | 6,37E-02  | 4,614669687  | 6,58E-01 | 4,17E-01 | 7,12E-01 | Rnf167        | 1,05 | No  |
| ENSMUSG00000040747 | 1,04E-01  | 8,96395331   | 3,33E+00 | 6,81E-02 | 3,28E-01 | Cd53          | 1,07 | No  |
| ENSMUSG00000040751 | 1,79E-01  | 5,965640321  | 7,43E+00 | 6,40E-03 | 6,73E-02 | Lat2          | 1,13 | No  |
| ENSMUSG00000040752 | -6,07E-01 | -2,268138786 | 7,14E-01 | 3,98E-01 | 6,98E-01 | Myh6          | 0,66 | No  |
| ENSMUSG00000040760 | -7,84E-03 | 5,971914944  | 1,44E-02 | 9,05E-01 | 1,00E+00 | Appl1         | 0,99 | No  |
| ENSMUSG00000040761 | 6,62E-02  | 6,620670165  | 1,14E+00 | 2,87E-01 | 5,83E-01 | Spen          | 1,05 | No  |
| ENSMUSG00000040767 | -3,82E-02 | 3,91822464   | 1,77E-01 | 6,74E-01 | 8,90E-01 | Snrnp25       | 0,97 | No  |
| ENSMUSG00000040771 | 3,37E-02  | 3,545173152  | 1,20E-01 | 7,29E-01 | 9,20E-01 | Oard1         | 1,02 | No  |
| ENSMUSG00000040774 | 3,46E-02  | 5,979045604  | 2,81E-01 | 5,96E-01 | 8,45E-01 | Cept1         | 1,02 | No  |
| ENSMUSG00000040775 | -2,67E+00 | -2,831989413 | 2,83E+00 | 9,23E-02 | 3,83E-01 | Gm9772        | 0,16 | No  |
| ENSMUSG00000040782 | -9,13E-02 | 4,582413621  | 1,32E+00 | 2,51E-01 | 5,50E-01 | Rfwd2         | 0,94 | No  |
| ENSMUSG00000040785 | -1,43E-01 | 5,697528853  | 4,48E+00 | 3,43E-02 | 2,18E-01 | Ttc3          | 0,91 | No  |
| ENSMUSG00000040794 | -1,02E+00 | -2,107712621 | 1,61E+00 | 2,05E-01 | 5,50E-01 | C1qtnf4       | 0,49 | No  |
| ENSMUSG00000040795 | 5,53E-02  | 3,11194346   | 2,70E-01 | 6,04E-01 | 8,48E-01 | lqcc          | 1,04 | No  |
| ENSMUSG00000040797 | -9,16E-02 | -2,600662698 | 7,64E-03 | 9,30E-01 | 1,00E+00 | lqsec3        | 0,94 | No  |
| ENSMUSG00000040809 | -2,49E-02 | 7,534976315  | 1,76E-01 | 6,75E-01 | 8,91E-01 | Chil3         | 0,98 | No  |
| ENSMUSG00000040811 | 5,27E-02  | 4,588177752  | 4,36E-01 | 5,09E-01 | 7,92E-01 | Eml2          | 1,04 | No  |
| ENSMUSG00000040812 | 2,21E-01  | -1,929370576 | 1,13E-01 | 7,37E-01 | 9,25E-01 | Agbl2         | 1,17 | No  |
| ENSMUSG00000040813 | 1,56E-01  | 6,068135788  | 5,68E+00 | 1,72E-02 | 1,37E-01 | Tex264        | 1,11 | No  |
| ENSMUSG00000040818 | -2,87E-02 | 5,152706545  | 1,59E-01 | 6,90E-01 | 8,99E-01 | Dennd6a       | 0,98 | No  |
| ENSMUSG00000040820 | 1,13E-01  | 4,016707808  | 1,61E+00 | 2,04E-01 | 5,50E-01 | Hlcs          | 1,08 | No  |
| ENSMUSG00000040822 | 8,03E-02  | 5,079468771  | 1,20E+00 | 2,73E-01 | 5,70E-01 | 1700123O2ORik | 1,06 | No  |
| ENSMUSG00000040824 | -3,55E-02 | 4,509390826  | 1,94E-01 | 6,60E-01 | 8,82E-01 | Snrpd2        | 0,98 | No  |
| ENSMUSG00000040828 | -2,90E-01 | -0,015515868 | 1,04E+00 | 3,08E-01 | 6,06E-01 | Catsperd      | 0,82 | No  |
| ENSMUSG00000040829 | -1,93E-01 | 5,658514317  | 8,13E+00 | 4,34E-03 | 5,03E-02 | Zmynd15       | 0,88 | No  |
| ENSMUSG00000040836 | 4,35E-01  | -1,896142013 | 4,12E-01 | 5,21E-01 | 8,00E-01 | Gpr161        | 1,35 | No  |

|                    |           |              |           |          |          |               |      |     |
|--------------------|-----------|--------------|-----------|----------|----------|---------------|------|-----|
| ENSMUSG00000040840 | 6,40E-02  | 3,463101491  | 4,13E-01  | 5,21E-01 | 7,99E-01 | 4930579G18Rik | 1,05 | No  |
| ENSMUSG00000040841 | 5,13E-02  | 0,615991624  | 4,84E-02  | 8,26E-01 | 9,74E-01 | Six5          | 1,04 | No  |
| ENSMUSG00000040842 | 2,80E-02  | 6,800466318  | 2,07E-01  | 6,49E-01 | 8,75E-01 | Szrd1         | 1,02 | No  |
| ENSMUSG00000040843 | 1,92E-02  | 4,725630035  | 6,20E-02  | 8,03E-01 | 9,62E-01 | Tiprl         | 1,01 | No  |
| ENSMUSG00000040848 | -2,05E-01 | 7,777876414  | 1,23E+01  | 4,51E-04 | 8,43E-03 | Sft2d2        | 0,87 | Yes |
| ENSMUSG00000040850 | -2,35E-02 | 6,589465343  | 1,42E-01  | 7,06E-01 | 9,08E-01 | Psme4         | 0,98 | No  |
| ENSMUSG00000040852 | 1,21E+00  | -2,655183342 | 9,04E-01  | 3,42E-01 | 6,42E-01 | Plekhh2       | 2,31 | No  |
| ENSMUSG00000040857 | 8,94E-02  | 4,63772842   | 1,30E+00  | 2,54E-01 | 5,50E-01 | Erf           | 1,06 | No  |
| ENSMUSG00000040859 | -5,79E-02 | 5,429357079  | 6,93E-01  | 4,05E-01 | 7,02E-01 | Bsdcl         | 0,96 | No  |
| ENSMUSG00000040860 | 1,89E-01  | 3,722556498  | 4,04E+00  | 4,45E-02 | 2,51E-01 | Crocc         | 1,14 | No  |
| ENSMUSG00000040865 | -9,72E-02 | 6,717643823  | 2,49E+00  | 1,14E-01 | 4,18E-01 | Ino80d        | 0,93 | No  |
| ENSMUSG00000040875 | -1,08E-02 | 2,485774707  | 6,77E-03  | 9,34E-01 | 1,00E+00 | Osopl10       | 0,99 | No  |
| ENSMUSG00000040877 | -1,68E-01 | 1,942556265  | 1,26E+00  | 2,62E-01 | 5,55E-01 | Wdr25         | 0,89 | No  |
| ENSMUSG00000040883 | 9,65E-03  | 3,412962917  | 9,23E-03  | 9,23E-01 | 1,00E+00 | Tmem205       | 1,01 | No  |
| ENSMUSG00000040888 | -5,14E-02 | 4,547384827  | 4,23E-01  | 5,16E-01 | 7,97E-01 | Gfer          | 0,96 | No  |
| ENSMUSG00000040891 | -3,83E-02 | -3,107651936 | -7,91E-11 | 1,00E+00 | 1,00E+00 | Foxa3         | 0,97 | No  |
| ENSMUSG00000040896 | -4,04E-02 | -2,770615379 | 1,11E-03  | 9,73E-01 | 1,00E+00 | Kcnd3         | 0,97 | No  |
| ENSMUSG00000040899 | -3,25E-01 | 0,563390326  | 1,92E+00  | 1,65E-01 | 5,18E-01 | Ccr6          | 0,80 | No  |
| ENSMUSG00000040901 | -8,69E-01 | -2,963204587 | 4,16E-01  | 5,19E-01 | 7,98E-01 | Kcnk18        | 0,55 | No  |
| ENSMUSG00000040904 | 6,23E-02  | 5,587509935  | 8,27E-01  | 3,63E-01 | 6,64E-01 | Gm21988       | 1,04 | No  |
| ENSMUSG00000040907 | 4,66E-02  | 7,986041981  | 6,39E-01  | 4,24E-01 | 7,19E-01 | Atp1a3        | 1,03 | No  |
| ENSMUSG00000040913 | -9,07E-02 | 3,853129439  | 9,98E-01  | 3,18E-01 | 6,18E-01 | Fbxw4         | 0,94 | No  |
| ENSMUSG00000040918 | 1,10E-01  | 4,911949512  | 2,16E+00  | 1,41E-01 | 4,75E-01 | Slc19a2       | 1,08 | No  |
| ENSMUSG00000040928 | -8,92E-02 | 5,163293733  | 1,56E+00  | 2,11E-01 | 5,50E-01 | S100pbp       | 0,94 | No  |
| ENSMUSG00000040929 | -1,84E-01 | 2,660173025  | 2,22E+00  | 1,36E-01 | 4,65E-01 | Rfx3          | 0,88 | No  |
| ENSMUSG00000040935 | 7,53E-01  | -2,89613942  | 3,09E-01  | 5,78E-01 | 8,36E-01 | Padi6         | 1,69 | No  |
| ENSMUSG00000040936 | 1,66E-01  | 5,735355789  | 6,05E+00  | 1,39E-02 | 1,19E-01 | Ulk4          | 1,12 | No  |
| ENSMUSG00000040938 | -2,26E-01 | -0,31106841  | 4,85E-01  | 4,86E-01 | 7,73E-01 | Slc16a11      | 0,85 | No  |
| ENSMUSG00000040940 | 6,61E-02  | 7,783768384  | 1,27E+00  | 2,60E-01 | 5,53E-01 | Arhgef1       | 1,05 | No  |
| ENSMUSG00000040943 | 5,64E-02  | 7,74403973   | 9,18E-01  | 3,38E-01 | 6,38E-01 | Tet2          | 1,04 | No  |
| ENSMUSG00000040945 | -5,86E-04 | 7,080337659  | 9,41E-05  | 9,92E-01 | 1,00E+00 | Rcc2          | 1,00 | No  |
| ENSMUSG00000040950 | 2,56E-01  | 9,668846909  | 2,05E+01  | 5,86E-06 | 2,08E-04 | Mgl2          | 1,19 | Yes |

|                    |           |              |          |          |          |           |      |     |
|--------------------|-----------|--------------|----------|----------|----------|-----------|------|-----|
| ENSMUSG00000040952 | -7,99E-02 | 5,619365994  | 1,39E+00 | 2,39E-01 | 5,50E-01 | Rps19     | 0,95 | No  |
| ENSMUSG00000040957 | 3,72E-01  | 2,897918647  | 9,95E+00 | 1,61E-03 | 2,36E-02 | Cables1   | 1,29 | Yes |
| ENSMUSG00000040963 | 3,15E-01  | 7,685936823  | 2,84E+01 | 1,00E-07 | 5,61E-06 | Asgr2     | 1,24 | Yes |
| ENSMUSG00000040964 | -8,10E-01 | 0,814576775  | 1,31E+01 | 2,90E-04 | 5,89E-03 | Arhgef10l | 0,57 | Yes |
| ENSMUSG00000040969 | -2,06E+00 | -2,770516624 | 3,22E+00 | 7,26E-02 | 3,42E-01 | Arhgef38  | 0,24 | No  |
| ENSMUSG00000040978 | 2,88E-01  | -0,980619578 | 4,04E-01 | 5,25E-01 | 8,02E-01 | Gm11992   | 1,22 | No  |
| ENSMUSG00000040985 | -6,68E-01 | -2,497587458 | 2,97E-01 | 5,86E-01 | 8,39E-01 | Sun3      | 0,63 | No  |
| ENSMUSG00000040987 | -8,87E-01 | -0,378095017 | 6,77E+00 | 9,27E-03 | 8,82E-02 | Mill2     | 0,54 | No  |
| ENSMUSG00000040997 | -5,93E-02 | 6,730645938  | 9,28E-01 | 3,35E-01 | 6,36E-01 | Abhd4     | 0,96 | No  |
| ENSMUSG00000040998 | -7,37E-01 | -1,146064406 | 3,03E+00 | 8,19E-02 | 3,68E-01 | Npnt      | 0,60 | No  |
| ENSMUSG00000041000 | -9,06E-02 | 3,159878507  | 7,00E-01 | 4,03E-01 | 7,01E-01 | Trim62    | 0,94 | No  |
| ENSMUSG00000041012 | 3,06E-01  | 0,091261174  | 1,10E+00 | 2,93E-01 | 5,89E-01 | Cmtm8     | 1,24 | No  |
| ENSMUSG00000041025 | -8,17E-02 | 5,03425439   | 1,27E+00 | 2,60E-01 | 5,53E-01 | lffo2     | 0,94 | No  |
| ENSMUSG00000041028 | -1,52E-01 | 7,83932794   | 6,80E+00 | 9,10E-03 | 8,70E-02 | Ghitm     | 0,90 | No  |
| ENSMUSG00000041035 | 2,69E-02  | 3,898199756  | 8,89E-02 | 7,66E-01 | 9,40E-01 | Gm17018   | 1,02 | No  |
| ENSMUSG00000041037 | 2,56E-01  | 4,818299072  | 1,15E+01 | 7,10E-04 | 1,22E-02 | Irgq      | 1,19 | Yes |
| ENSMUSG00000041040 | 8,57E-02  | 6,325021124  | 1,81E+00 | 1,78E-01 | 5,38E-01 | Fam117b   | 1,06 | No  |
| ENSMUSG00000041046 | -1,05E+00 | 4,06245903   | 1,43E+02 | 7,10E-33 | 4,84E-30 | Ramp3     | 0,48 | Yes |
| ENSMUSG00000041057 | -2,69E-02 | 5,348364926  | 1,45E-01 | 7,04E-01 | 9,06E-01 | Wdr43     | 0,98 | No  |
| ENSMUSG00000041058 | 7,95E-02  | 4,776707827  | 1,07E+00 | 3,02E-01 | 5,98E-01 | Wwp1      | 1,06 | No  |
| ENSMUSG00000041062 | 8,22E-01  | -2,655170814 | 5,88E-01 | 4,43E-01 | 7,35E-01 | Mslnl     | 1,77 | No  |
| ENSMUSG00000041064 | 2,95E-01  | 3,147411664  | 7,71E+00 | 5,51E-03 | 6,00E-02 | Pif1      | 1,23 | No  |
| ENSMUSG00000041073 | -2,97E-01 | -0,600640977 | 6,47E-01 | 4,21E-01 | 7,16E-01 | Nacad     | 0,81 | No  |
| ENSMUSG00000041075 | -1,97E-02 | 4,881465216  | 6,81E-02 | 7,94E-01 | 9,56E-01 | Fzd7      | 0,99 | No  |
| ENSMUSG00000041078 | 7,06E-01  | -0,648402495 | 3,77E+00 | 5,23E-02 | 2,78E-01 | Grid1     | 1,63 | No  |
| ENSMUSG00000041079 | 1,35E-01  | 2,949510975  | 1,37E+00 | 2,42E-01 | 5,50E-01 | Rwdd2b    | 1,10 | No  |
| ENSMUSG00000041084 | 7,13E-02  | 6,003656442  | 1,18E+00 | 2,77E-01 | 5,74E-01 | Ostc      | 1,05 | No  |
| ENSMUSG00000041112 | -1,23E-02 | 5,922926133  | 3,51E-02 | 8,51E-01 | 9,90E-01 | Elmo1     | 0,99 | No  |
| ENSMUSG00000041117 | 3,56E-01  | -1,205805989 | 6,15E-01 | 4,33E-01 | 7,26E-01 | Ccdc8     | 1,28 | No  |
| ENSMUSG00000041119 | 1,21E+00  | -1,522781551 | 4,63E+00 | 3,13E-02 | 2,05E-01 | Pde9a     | 2,31 | No  |
| ENSMUSG00000041120 | -6,83E-01 | 1,091979795  | 1,19E+01 | 5,50E-04 | 9,92E-03 | Nbl1      | 0,62 | Yes |
| ENSMUSG00000041124 | 9,34E-02  | 4,970888647  | 1,59E+00 | 2,08E-01 | 5,50E-01 | Msantd4   | 1,07 | No  |

|                    |           |              |          |          |          |           |      |     |
|--------------------|-----------|--------------|----------|----------|----------|-----------|------|-----|
| ENSMUSG00000041126 | -1,84E-02 | 4,527746695  | 5,24E-02 | 8,19E-01 | 9,71E-01 | H2afv     | 0,99 | No  |
| ENSMUSG00000041130 | -2,37E-01 | 6,04344992   | 1,34E+01 | 2,56E-04 | 5,32E-03 | Zfp598    | 0,85 | Yes |
| ENSMUSG00000041132 | -5,80E-01 | 5,516363283  | 7,21E+01 | 2,03E-17 | 3,95E-15 | N4bp2l1   | 0,67 | Yes |
| ENSMUSG00000041134 | -2,16E-01 | 1,764940898  | 1,83E+00 | 1,77E-01 | 5,36E-01 | Cyyr1     | 0,86 | No  |
| ENSMUSG00000041135 | -2,81E-03 | 5,036945603  | 1,43E-03 | 9,70E-01 | 1,00E+00 | Ripk2     | 1,00 | No  |
| ENSMUSG00000041138 | 2,59E+00  | -2,963287563 | 2,60E+00 | 1,07E-01 | 3,99E-01 | Nme8      | 6,03 | No  |
| ENSMUSG00000041143 | 4,38E-02  | 5,036830728  | 3,53E-01 | 5,52E-01 | 8,18E-01 | Tmco4     | 1,03 | No  |
| ENSMUSG00000041144 | 1,87E+00  | -3,107639691 | 1,38E+00 | 2,40E-01 | 5,50E-01 | Dnah7b    | 3,67 | No  |
| ENSMUSG00000041147 | 2,12E-01  | 4,288633     | 6,40E+00 | 1,14E-02 | 1,03E-01 | Brca2     | 1,16 | No  |
| ENSMUSG00000041153 | -2,17E-01 | 5,288177747  | 9,25E+00 | 2,36E-03 | 3,20E-02 | Osgin2    | 0,86 | Yes |
| ENSMUSG00000041161 | 1,46E-02  | 3,106073929  | 1,76E-02 | 8,94E-01 | 1,00E+00 | Otud3     | 1,01 | No  |
| ENSMUSG00000041164 | -1,72E-01 | 8,358271817  | 8,89E+00 | 2,86E-03 | 3,69E-02 | Zmiz2     | 0,89 | Yes |
| ENSMUSG00000041165 | -1,87E+00 | -3,107637761 | 1,39E+00 | 2,38E-01 | 5,50E-01 | Spem1     | 0,27 | No  |
| ENSMUSG00000041168 | 7,66E-02  | 5,946726211  | 1,35E+00 | 2,45E-01 | 5,50E-01 | Lonp1     | 1,05 | No  |
| ENSMUSG00000041180 | -5,43E-02 | 2,008645598  | 1,30E-01 | 7,19E-01 | 9,15E-01 | Hectd2    | 0,96 | No  |
| ENSMUSG00000041187 | 2,98E-02  | 4,583668862  | 1,44E-01 | 7,05E-01 | 9,07E-01 | Prkd2     | 1,02 | No  |
| ENSMUSG00000041189 | -3,44E-01 | 1,002025687  | 3,07E+00 | 7,95E-02 | 3,61E-01 | Chrnbl    | 0,79 | No  |
| ENSMUSG00000041193 | -1,78E+00 | -2,070103306 | 6,33E+00 | 1,19E-02 | 1,06E-01 | Pla2g5    | 0,29 | No  |
| ENSMUSG00000041199 | 1,67E-02  | 3,933381801  | 3,41E-02 | 8,54E-01 | 9,91E-01 | Rpusd1    | 1,01 | No  |
| ENSMUSG00000041202 | -4,48E-01 | -1,033671092 | 1,07E+00 | 3,02E-01 | 5,98E-01 | Pla2g2d   | 0,73 | No  |
| ENSMUSG00000041203 | 2,55E-03  | 6,145884453  | 1,55E-03 | 9,69E-01 | 1,00E+00 | Trir      | 1,00 | No  |
| ENSMUSG00000041205 | -9,34E-01 | -0,682877005 | 5,19E+00 | 2,28E-02 | 1,64E-01 | Map6d1    | 0,52 | No  |
| ENSMUSG00000041215 | 2,12E-01  | 4,718337482  | 7,56E+00 | 5,96E-03 | 6,38E-02 | Yeats2    | 1,16 | No  |
| ENSMUSG00000041216 | -1,10E-01 | 2,233204079  | 6,08E-01 | 4,36E-01 | 7,28E-01 | Clvs1     | 0,93 | No  |
| ENSMUSG00000041219 | 1,60E-01  | 6,449159542  | 6,47E+00 | 1,10E-02 | 9,99E-02 | Arhgap11a | 1,12 | No  |
| ENSMUSG00000041220 | 2,00E-01  | 4,643157935  | 6,41E+00 | 1,14E-02 | 1,02E-01 | Elovl6    | 1,15 | No  |
| ENSMUSG00000041225 | 5,87E-03  | 4,914631482  | 6,20E-03 | 9,37E-01 | 1,00E+00 | Arhgap12  | 1,00 | No  |
| ENSMUSG00000041231 | 2,68E-01  | 3,63165293   | 7,67E+00 | 5,62E-03 | 6,09E-02 | Ublcp1    | 1,20 | No  |
| ENSMUSG00000041235 | -2,41E-01 | 6,223462809  | 1,40E+01 | 1,85E-04 | 4,07E-03 | Chd7      | 0,85 | Yes |
| ENSMUSG00000041236 | 3,50E-02  | 6,023569982  | 2,90E-01 | 5,90E-01 | 8,41E-01 | Vps41     | 1,02 | No  |
| ENSMUSG00000041237 | -4,82E-01 | -2,2895109   | 3,04E-01 | 5,81E-01 | 8,37E-01 | Pklr      | 0,72 | No  |
| ENSMUSG00000041238 | -1,02E-01 | 5,528943876  | 2,20E+00 | 1,38E-01 | 4,68E-01 | Rbbp8     | 0,93 | No  |

|                    |           |              |          |          |          |         |      |     |
|--------------------|-----------|--------------|----------|----------|----------|---------|------|-----|
| ENSMUSG00000041241 | 1,32E-02  | 4,987315908  | 3,18E-02 | 8,59E-01 | 9,94E-01 | Mul1    | 1,01 | No  |
| ENSMUSG00000041247 | -2,36E-01 | 0,471087078  | 9,07E-01 | 3,41E-01 | 6,42E-01 | Lamp3   | 0,85 | No  |
| ENSMUSG00000041248 | 1,87E+00  | -3,107639691 | 1,38E+00 | 2,40E-01 | 5,50E-01 | Kcnj1   | 3,67 | No  |
| ENSMUSG00000041258 | -1,12E-02 | 6,098358636  | 2,99E-02 | 8,63E-01 | 9,97E-01 | Zfp236  | 0,99 | No  |
| ENSMUSG00000041261 | 1,81E+00  | -3,10765737  | 1,28E+00 | 2,58E-01 | 5,50E-01 | Car8    | 3,49 | No  |
| ENSMUSG00000041263 | 1,47E-01  | 4,159318273  | 2,91E+00 | 8,79E-02 | 3,79E-01 | Rusc1   | 1,11 | No  |
| ENSMUSG00000041264 | 1,39E-01  | 5,048304376  | 3,59E+00 | 5,80E-02 | 2,97E-01 | Uspl1   | 1,10 | No  |
| ENSMUSG00000041268 | -5,37E-03 | 7,215799151  | 7,98E-03 | 9,29E-01 | 1,00E+00 | Dmxi2   | 1,00 | No  |
| ENSMUSG00000041272 | 5,24E-01  | 2,15696848   | 1,21E+01 | 4,93E-04 | 9,06E-03 | Tox     | 1,44 | Yes |
| ENSMUSG00000041278 | 1,61E-02  | 4,81037125   | 4,44E-02 | 8,33E-01 | 9,79E-01 | Ttc1    | 1,01 | No  |
| ENSMUSG00000041287 | -1,83E-01 | -1,535382771 | 1,13E-01 | 7,37E-01 | 9,25E-01 | Sox15   | 0,88 | No  |
| ENSMUSG00000041293 | -1,74E+00 | -2,655119487 | 2,10E+00 | 1,47E-01 | 4,85E-01 | Adgrf1  | 0,30 | No  |
| ENSMUSG00000041297 | 1,55E-03  | 6,380645516  | 6,02E-04 | 9,80E-01 | 1,00E+00 | Cdk13   | 1,00 | No  |
| ENSMUSG00000041298 | 2,06E-01  | 3,468937216  | 4,32E+00 | 3,78E-02 | 2,31E-01 | Katnal1 | 1,15 | No  |
| ENSMUSG00000041301 | -2,92E+00 | -2,033599752 | 1,40E+01 | 1,78E-04 | 3,94E-03 | Cftr    | 0,13 | Yes |
| ENSMUSG00000041303 | 8,62E-02  | 4,215084238  | 1,04E+00 | 3,08E-01 | 6,06E-01 | Gtf3c3  | 1,06 | No  |
| ENSMUSG00000041308 | 1,68E-01  | 5,488727364  | 5,87E+00 | 1,54E-02 | 1,28E-01 | Sntb2   | 1,12 | No  |
| ENSMUSG00000041309 | 1,02E-01  | 0,454937956  | 1,57E-01 | 6,92E-01 | 9,01E-01 | Nkx6-2  | 1,07 | No  |
| ENSMUSG00000041313 | 1,83E-01  | 6,259378683  | 8,14E+00 | 4,33E-03 | 5,02E-02 | Slc7a1  | 1,14 | No  |
| ENSMUSG00000041319 | 1,50E-01  | 3,815212807  | 2,64E+00 | 1,04E-01 | 3,97E-01 | Thoc6   | 1,11 | No  |
| ENSMUSG00000041323 | 4,48E-01  | -2,448608679 | 1,57E-01 | 6,92E-01 | 9,00E-01 | Ak7     | 1,36 | No  |
| ENSMUSG00000041324 | -4,99E-03 | 6,990602588  | 6,73E-03 | 9,35E-01 | 1,00E+00 | Inhba   | 1,00 | No  |
| ENSMUSG00000041328 | 5,14E-02  | 6,431942747  | 6,64E-01 | 4,15E-01 | 7,10E-01 | Pcf11   | 1,04 | No  |
| ENSMUSG00000041329 | 7,29E-01  | -1,333334074 | 1,79E+00 | 1,81E-01 | 5,43E-01 | Atp1b2  | 1,66 | No  |
| ENSMUSG00000041341 | 1,24E-01  | 5,923046244  | 3,56E+00 | 5,93E-02 | 3,01E-01 | Atg2b   | 1,09 | No  |
| ENSMUSG00000041343 | -7,82E-02 | 0,868127549  | 1,34E-01 | 7,14E-01 | 9,12E-01 | Ankrd42 | 0,95 | No  |
| ENSMUSG00000041346 | 6,88E-02  | 3,275755772  | 4,20E-01 | 5,17E-01 | 7,98E-01 | Wrap53  | 1,05 | No  |
| ENSMUSG00000041347 | -4,35E-01 | -2,268119106 | 1,93E-01 | 6,60E-01 | 8,82E-01 | Bdkrb1  | 0,74 | No  |
| ENSMUSG00000041351 | -4,28E-01 | 3,565854232  | 1,95E+01 | 1,01E-05 | 3,40E-04 | Rap1gap | 0,74 | Yes |
| ENSMUSG00000041354 | 6,98E-02  | 6,383695615  | 1,22E+00 | 2,69E-01 | 5,65E-01 | Rgl2    | 1,05 | No  |
| ENSMUSG00000041355 | -8,77E-03 | 6,564526197  | 1,97E-02 | 8,88E-01 | 1,00E+00 | Ssr2    | 0,99 | No  |
| ENSMUSG00000041358 | -6,24E-01 | -1,831991978 | 7,57E-01 | 3,84E-01 | 6,86E-01 | Nutm1   | 0,65 | No  |



|                    |           |              |           |          |          |           |      |     |
|--------------------|-----------|--------------|-----------|----------|----------|-----------|------|-----|
| ENSMUSG00000041360 | 8,65E-02  | 5,11490348   | 1,41E+00  | 2,35E-01 | 5,50E-01 | Pum3      | 1,06 | No  |
| ENSMUSG00000041361 | -7,92E-01 | -0,904007832 | 3,65E+00  | 5,59E-02 | 2,90E-01 | Myzap     | 0,58 | No  |
| ENSMUSG00000041362 | 1,56E-01  | 7,761967819  | 7,09E+00  | 7,77E-03 | 7,72E-02 | Shtn1     | 1,11 | No  |
| ENSMUSG00000041372 | 1,87E+00  | -3,03364371  | 1,36E+00  | 2,43E-01 | 5,50E-01 | B4galnt3  | 3,66 | No  |
| ENSMUSG00000041375 | -4,93E-02 | 5,48355615   | 5,09E-01  | 4,76E-01 | 7,64E-01 | Ccdc9     | 0,97 | No  |
| ENSMUSG00000041377 | -1,94E+00 | -3,107619243 | 1,50E+00  | 2,21E-01 | 5,50E-01 | Ninj2     | 0,26 | No  |
| ENSMUSG00000041390 | 2,55E-01  | 6,668208713  | 1,69E+01  | 3,96E-05 | 1,11E-03 | Mdfic     | 1,19 | Yes |
| ENSMUSG00000041396 | 1,53E-01  | 1,502367721  | 7,63E-01  | 3,82E-01 | 6,84E-01 | Mettl18   | 1,11 | No  |
| ENSMUSG00000041406 | 2,40E-01  | 3,463924218  | 5,75E+00  | 1,65E-02 | 1,34E-01 | BC055324  | 1,18 | No  |
| ENSMUSG00000041408 | -1,66E-03 | 7,080739169  | 7,58E-04  | 9,78E-01 | 1,00E+00 | Wapl      | 1,00 | No  |
| ENSMUSG00000041415 | 1,82E-02  | 6,445879243  | 8,34E-02  | 7,73E-01 | 9,44E-01 | Dicer1    | 1,01 | No  |
| ENSMUSG00000041417 | -2,42E-01 | 7,525564942  | 1,67E+01  | 4,40E-05 | 1,22E-03 | Pik3r1    | 0,85 | Yes |
| ENSMUSG00000041420 | -1,27E-02 | 3,580283826  | 1,66E-02  | 8,97E-01 | 1,00E+00 | Meis3     | 0,99 | No  |
| ENSMUSG00000041423 | -9,71E-01 | -1,574006454 | 3,27E+00  | 7,05E-02 | 3,36E-01 | Paqr6     | 0,51 | No  |
| ENSMUSG00000041426 | -9,04E-02 | 1,044923233  | 1,87E-01  | 6,66E-01 | 8,85E-01 | Hibch     | 0,94 | No  |
| ENSMUSG00000041429 | -2,31E-01 | 1,533637141  | 1,82E+00  | 1,77E-01 | 5,36E-01 | Nthl1     | 0,85 | No  |
| ENSMUSG00000041431 | 1,53E-01  | 4,819765462  | 4,06E+00  | 4,39E-02 | 2,50E-01 | Ccnb1     | 1,11 | No  |
| ENSMUSG00000041438 | -1,05E-01 | 4,497959261  | 1,67E+00  | 1,96E-01 | 5,50E-01 | Utp4      | 0,93 | No  |
| ENSMUSG00000041439 | 2,70E-01  | 5,666064248  | 1,59E+01  | 6,84E-05 | 1,76E-03 | Mfsd6     | 1,21 | Yes |
| ENSMUSG00000041440 | 2,07E-01  | 2,795083198  | 2,93E+00  | 8,68E-02 | 3,78E-01 | Gk5       | 1,15 | No  |
| ENSMUSG00000041444 | 6,39E-01  | 0,45804099   | 6,72E+00  | 9,52E-03 | 8,99E-02 | Arhgap32  | 1,56 | No  |
| ENSMUSG00000041445 | -2,79E-02 | -2,89614703  | 4,02E-04  | 9,84E-01 | 1,00E+00 | Mmrn2     | 0,98 | No  |
| ENSMUSG00000041449 | -1,34E-01 | -1,816509489 | 5,53E-02  | 8,14E-01 | 9,68E-01 | Serpina3h | 0,91 | No  |
| ENSMUSG00000041453 | -3,17E-01 | 4,522209608  | 1,57E+01  | 7,44E-05 | 1,89E-03 | Rpl21     | 0,80 | Yes |
| ENSMUSG00000041459 | -4,72E-02 | 7,31128948   | 6,25E-01  | 4,29E-01 | 7,23E-01 | Tardbp    | 0,97 | No  |
| ENSMUSG00000041460 | -2,37E-01 | -2,146052242 | 1,10E-01  | 7,40E-01 | 9,26E-01 | Cacna2d4  | 0,85 | No  |
| ENSMUSG00000041468 | -3,83E-02 | -3,107651936 | -7,91E-11 | 1,00E+00 | 1,00E+00 | Gpr12     | 0,97 | No  |
| ENSMUSG00000041471 | -1,49E-02 | 2,786856522  | 1,55E-02  | 9,01E-01 | 1,00E+00 | Fam35a    | 0,99 | No  |
| ENSMUSG00000041477 | 1,33E-01  | 3,041006965  | 1,45E+00  | 2,29E-01 | 5,50E-01 | Dcp1b     | 1,10 | No  |
| ENSMUSG00000041479 | 8,18E-01  | -2,448736636 | 5,83E-01  | 4,45E-01 | 7,36E-01 | Syt15     | 1,76 | No  |
| ENSMUSG00000041481 | -7,19E-01 | 5,551773865  | 1,12E+02  | 3,84E-26 | 1,47E-23 | Serpina3g | 0,61 | Yes |
| ENSMUSG00000041482 | -8,42E-01 | -2,896108869 | 3,88E-01  | 5,33E-01 | 8,06E-01 | Piezo2    | 0,56 | No  |

|                    |           |              |           |          |          |               |      |     |
|--------------------|-----------|--------------|-----------|----------|----------|---------------|------|-----|
| ENSMUSG00000041483 | -2,23E-02 | 4,429229839  | 7,52E-02  | 7,84E-01 | 9,51E-01 | Zfp281        | 0,98 | No  |
| ENSMUSG00000041488 | 1,51E-01  | 6,395930031  | 5,65E+00  | 1,74E-02 | 1,38E-01 | Stx3          | 1,11 | No  |
| ENSMUSG00000041491 | 1,51E-01  | 3,258792583  | 1,99E+00  | 1,58E-01 | 5,05E-01 | Cep78         | 1,11 | No  |
| ENSMUSG00000041498 | 3,26E-01  | 4,51519373   | 1,65E+01  | 4,89E-05 | 1,34E-03 | Kif14         | 1,25 | Yes |
| ENSMUSG00000041506 | 3,93E-02  | 4,059223354  | 1,98E-01  | 6,56E-01 | 8,80E-01 | Rrp9          | 1,03 | No  |
| ENSMUSG00000041515 | -4,04E-01 | 8,158595152  | 4,86E+01  | 3,10E-12 | 3,55E-10 | Irf8          | 0,76 | Yes |
| ENSMUSG00000041523 | 1,82E+00  | -3,033661385 | 1,31E+00  | 2,52E-01 | 5,50E-01 | Upk2          | 3,54 | No  |
| ENSMUSG00000041528 | -7,88E-02 | 5,395297771  | 1,27E+00  | 2,60E-01 | 5,52E-01 | Rnf123        | 0,95 | No  |
| ENSMUSG00000041530 | -2,16E-01 | 6,53830959   | 1,20E+01  | 5,21E-04 | 9,48E-03 | Ago1          | 0,86 | Yes |
| ENSMUSG00000041536 | 9,01E-03  | -3,107646452 | -5,16E-10 | 1,00E+00 | 1,00E+00 | Serpina3a     | 1,01 | No  |
| ENSMUSG00000041538 | 2,69E-02  | 5,427314569  | 1,46E-01  | 7,02E-01 | 9,05E-01 | H2-Ob         | 1,02 | No  |
| ENSMUSG00000041540 | -2,98E-01 | -2,226244558 | 1,33E-01  | 7,16E-01 | 9,13E-01 | Sox5          | 0,81 | No  |
| ENSMUSG00000041544 | -1,95E+00 | -3,033628749 | 1,50E+00  | 2,21E-01 | 5,50E-01 | Disp3         | 0,26 | No  |
| ENSMUSG00000041548 | 7,31E-01  | -2,963279337 | 2,91E-01  | 5,90E-01 | 8,41E-01 | Hspb8         | 1,66 | No  |
| ENSMUSG00000041550 | 1,82E+00  | -3,033661385 | 1,31E+00  | 2,52E-01 | 5,50E-01 | Serpina5      | 3,54 | No  |
| ENSMUSG00000041556 | 1,22E+00  | -2,401349888 | 9,30E-01  | 3,35E-01 | 6,36E-01 | Fbxo2         | 2,34 | No  |
| ENSMUSG00000041559 | 2,65E+00  | -2,896119006 | 2,71E+00  | 9,98E-02 | 3,92E-01 | Fmod          | 6,28 | No  |
| ENSMUSG00000041560 | -1,80E-01 | 5,887288458  | 7,40E+00  | 6,54E-03 | 6,83E-02 | Nop53         | 0,88 | No  |
| ENSMUSG00000041566 | -3,72E-02 | -2,35554854  | 1,90E-03  | 9,65E-01 | 1,00E+00 | Tssk1         | 0,97 | No  |
| ENSMUSG00000041567 | 1,81E+00  | -3,10765737  | 1,28E+00  | 2,58E-01 | 5,50E-01 | Serpina12     | 3,49 | No  |
| ENSMUSG00000041570 | 1,33E-01  | 6,011679937  | 4,16E+00  | 4,15E-02 | 2,42E-01 | Camsap2       | 1,10 | No  |
| ENSMUSG00000041571 | -1,69E-01 | 5,295694191  | 5,63E+00  | 1,77E-02 | 1,39E-01 | Selenow       | 0,89 | No  |
| ENSMUSG00000041577 | -2,71E+00 | -2,929237214 | 2,91E+00  | 8,81E-02 | 3,79E-01 | Prelp         | 0,15 | No  |
| ENSMUSG00000041583 | 3,14E-02  | -3,107617333 | -7,69E-10 | 1,00E+00 | 1,00E+00 | Obox6         | 1,02 | No  |
| ENSMUSG00000041592 | -2,64E-01 | 0,338007873  | 1,13E+00  | 2,87E-01 | 5,83E-01 | Sdk2          | 0,83 | No  |
| ENSMUSG00000041594 | -8,68E-03 | 2,572017222  | 4,78E-03  | 9,45E-01 | 1,00E+00 | Tmtc4         | 0,99 | No  |
| ENSMUSG00000041598 | 2,03E-01  | 4,409528356  | 6,10E+00  | 1,36E-02 | 1,17E-01 | Cdc42ep4      | 1,15 | No  |
| ENSMUSG00000041605 | -3,22E+00 | -2,963202658 | 4,38E+00  | 3,63E-02 | 2,26E-01 | 5730559C18Rik | 0,11 | No  |
| ENSMUSG00000041607 | -2,51E-01 | 6,636025476  | 1,63E+01  | 5,31E-05 | 1,43E-03 | Mbp           | 0,84 | Yes |
| ENSMUSG00000041608 | 1,08E+00  | -0,268623891 | 1,03E+01  | 1,33E-03 | 2,03E-02 | Entpd3        | 2,11 | Yes |
| ENSMUSG00000041609 | 6,52E-02  | 2,083156639  | 2,06E-01  | 6,50E-01 | 8,76E-01 | Bicd1         | 1,05 | No  |
| ENSMUSG00000041616 | 7,27E-01  | -1,912649428 | 1,19E+00  | 2,76E-01 | 5,73E-01 | Nppa          | 1,66 | No  |

|                    |           |              |          |          |          |               |      |     |
|--------------------|-----------|--------------|----------|----------|----------|---------------|------|-----|
| ENSMUSG00000041617 | 1,39E-01  | 1,531350019  | 6,63E-01 | 4,16E-01 | 7,11E-01 | Ccdc74a       | 1,10 | No  |
| ENSMUSG00000041620 | 2,16E-01  | 2,970602301  | 3,38E+00 | 6,61E-02 | 3,23E-01 | Mmp1b         | 1,16 | No  |
| ENSMUSG00000041623 | 1,05E-01  | 3,126960123  | 9,78E-01 | 3,23E-01 | 6,23E-01 | D11Wsu47e     | 1,08 | No  |
| ENSMUSG00000041624 | 2,67E+00  | -3,033636951 | 2,76E+00 | 9,68E-02 | 3,88E-01 | Gucy1a2       | 6,36 | No  |
| ENSMUSG00000041625 | -1,46E-01 | 1,004477242  | 4,95E-01 | 4,82E-01 | 7,69E-01 | Ggact         | 0,90 | No  |
| ENSMUSG00000041629 | -7,18E-02 | 5,176167865  | 9,93E-01 | 3,19E-01 | 6,19E-01 | Fam104a       | 0,95 | No  |
| ENSMUSG00000041632 | 5,73E-02  | 3,745271955  | 3,70E-01 | 5,43E-01 | 8,12E-01 | Mrps27        | 1,04 | No  |
| ENSMUSG00000041638 | 5,51E-02  | 6,451804702  | 7,65E-01 | 3,82E-01 | 6,83E-01 | Gcn1l1        | 1,04 | No  |
| ENSMUSG00000041642 | -1,04E-01 | 6,42904286   | 2,74E+00 | 9,82E-02 | 3,91E-01 | Kif21b        | 0,93 | No  |
| ENSMUSG00000041645 | -3,29E-03 | 6,720698931  | 2,83E-03 | 9,58E-01 | 1,00E+00 | Ddx24         | 1,00 | No  |
| ENSMUSG00000041650 | -4,56E-02 | 3,754184216  | 2,35E-01 | 6,28E-01 | 8,61E-01 | Pcca          | 0,97 | No  |
| ENSMUSG00000041654 | 8,62E-02  | 5,797470534  | 1,66E+00 | 1,98E-01 | 5,50E-01 | Slc39a11      | 1,06 | No  |
| ENSMUSG00000041669 | -3,66E-01 | -2,497640097 | 1,69E-01 | 6,81E-01 | 8,94E-01 | Prima1        | 0,78 | No  |
| ENSMUSG00000041671 | 1,48E-01  | 3,772884325  | 2,50E+00 | 1,14E-01 | 4,16E-01 | Pyroxd1       | 1,11 | No  |
| ENSMUSG00000041673 | 2,83E-01  | 0,464521699  | 1,13E+00 | 2,87E-01 | 5,83E-01 | Lrrc18        | 1,22 | No  |
| ENSMUSG00000041679 | -4,64E-01 | 1,899850071  | 9,05E+00 | 2,63E-03 | 3,46E-02 | Lrrc29        | 0,73 | Yes |
| ENSMUSG00000041681 | -1,87E+00 | -3,107637761 | 1,39E+00 | 2,38E-01 | 5,50E-01 | lapp          | 0,27 | No  |
| ENSMUSG00000041684 | 3,97E-02  | 3,851255578  | 1,90E-01 | 6,63E-01 | 8,83E-01 | Bivm          | 1,03 | No  |
| ENSMUSG00000041685 | 1,27E-01  | 7,186215281  | 4,44E+00 | 3,51E-02 | 2,22E-01 | Fcho2         | 1,09 | No  |
| ENSMUSG00000041695 | 8,32E-03  | 2,472777779  | 3,73E-03 | 9,51E-01 | 1,00E+00 | Kcnj2         | 1,01 | No  |
| ENSMUSG00000041696 | 3,75E-01  | 1,748934293  | 5,41E+00 | 2,00E-02 | 1,51E-01 | Rasl12        | 1,30 | No  |
| ENSMUSG00000041697 | -5,08E-02 | 7,166213479  | 7,13E-01 | 3,99E-01 | 6,98E-01 | Cox6a1        | 0,97 | No  |
| ENSMUSG00000041702 | -8,90E-03 | 5,85072848   | 1,80E-02 | 8,93E-01 | 1,00E+00 | Btbd7         | 0,99 | No  |
| ENSMUSG00000041703 | -2,24E+00 | -2,600672422 | 4,07E+00 | 4,37E-02 | 2,49E-01 | Zic5          | 0,21 | No  |
| ENSMUSG00000041707 | -1,05E-01 | 4,635742058  | 1,79E+00 | 1,81E-01 | 5,43E-01 | 1810011H11Rik | 0,93 | No  |
| ENSMUSG00000041708 | -1,37E+00 | -2,896128821 | 1,18E+00 | 2,77E-01 | 5,74E-01 | Mpped1        | 0,39 | No  |
| ENSMUSG00000041712 | -7,68E-03 | 5,62367772   | 1,27E-02 | 9,10E-01 | 1,00E+00 | Ubr7          | 0,99 | No  |
| ENSMUSG00000041716 | -1,13E-01 | 3,195062247  | 1,11E+00 | 2,92E-01 | 5,88E-01 | Gm20604       | 0,92 | No  |
| ENSMUSG00000041720 | 8,64E-02  | 7,72934681   | 2,16E+00 | 1,42E-01 | 4,76E-01 | Pi4ka         | 1,06 | No  |
| ENSMUSG00000041722 | -2,02E+00 | -2,600619696 | 3,08E+00 | 7,94E-02 | 3,60E-01 | Khdc1c        | 0,25 | No  |
| ENSMUSG00000041729 | 1,08E+00  | 0,720521308  | 1,79E+01 | 2,33E-05 | 7,09E-04 | Coro2b        | 2,12 | Yes |
| ENSMUSG00000041730 | -1,87E+00 | -3,107637761 | 1,39E+00 | 2,38E-01 | 5,50E-01 | Prrxl1        | 0,27 | No  |

|                    |           |              |          |          |          |               |      |     |
|--------------------|-----------|--------------|----------|----------|----------|---------------|------|-----|
| ENSMUSG00000041731 | -5,00E-02 | -2,655085571 | 2,26E-03 | 9,62E-01 | 1,00E+00 | Pgm5          | 0,97 | No  |
| ENSMUSG00000041733 | 1,05E-01  | 4,361717561  | 1,64E+00 | 2,01E-01 | 5,50E-01 | Coq5          | 1,08 | No  |
| ENSMUSG00000041734 | -8,45E-01 | -0,300174396 | 6,49E+00 | 1,09E-02 | 9,93E-02 | Kirrel        | 0,56 | No  |
| ENSMUSG00000041736 | -1,69E-01 | 7,670148822  | 8,24E+00 | 4,09E-03 | 4,81E-02 | Tspo          | 0,89 | Yes |
| ENSMUSG00000041737 | -8,56E-01 | -2,832005432 | 4,01E-01 | 5,26E-01 | 8,03E-01 | Tmem45b       | 0,55 | No  |
| ENSMUSG00000041740 | 7,26E-02  | 7,468825444  | 1,50E+00 | 2,21E-01 | 5,50E-01 | Rnf10         | 1,05 | No  |
| ENSMUSG00000041741 | -3,19E+00 | -2,896117911 | 4,30E+00 | 3,81E-02 | 2,32E-01 | Pde3a         | 0,11 | No  |
| ENSMUSG00000041747 | 1,86E-01  | 5,442114742  | 7,09E+00 | 7,73E-03 | 7,70E-02 | Utp15         | 1,14 | No  |
| ENSMUSG00000041750 | -1,32E-01 | 2,483125162  | 1,02E+00 | 3,11E-01 | 6,11E-01 | Cd1d2         | 0,91 | No  |
| ENSMUSG00000041754 | -7,44E-02 | 0,259293045  | 7,25E-02 | 7,88E-01 | 9,53E-01 | Trem3         | 0,95 | No  |
| ENSMUSG00000041757 | 5,93E-02  | 3,27389973   | 3,17E-01 | 5,73E-01 | 8,33E-01 | Plekha6       | 1,04 | No  |
| ENSMUSG00000041762 | 3,18E-01  | 4,003337236  | 1,28E+01 | 3,44E-04 | 6,76E-03 | Gpr155        | 1,25 | Yes |
| ENSMUSG00000041763 | 1,63E-02  | 6,504637861  | 6,71E-02 | 7,96E-01 | 9,57E-01 | Tpp2          | 1,01 | No  |
| ENSMUSG00000041765 | -1,27E-02 | 5,147736596  | 3,08E-02 | 8,61E-01 | 9,96E-01 | Ubac2         | 0,99 | No  |
| ENSMUSG00000041769 | -4,29E-02 | 5,105504321  | 3,48E-01 | 5,55E-01 | 8,20E-01 | Ppp2r2d       | 0,97 | No  |
| ENSMUSG00000041771 | 1,28E+00  | -2,655085656 | 1,01E+00 | 3,15E-01 | 6,16E-01 | Slc24a4       | 2,42 | No  |
| ENSMUSG00000041773 | 1,91E-01  | 4,542493886  | 5,68E+00 | 1,71E-02 | 1,37E-01 | Enc1          | 1,14 | No  |
| ENSMUSG00000041774 | 4,69E-02  | 3,398984453  | 2,15E-01 | 6,43E-01 | 8,71E-01 | Ydjc          | 1,03 | No  |
| ENSMUSG00000041775 | 3,65E-02  | 3,219597972  | 1,22E-01 | 7,27E-01 | 9,19E-01 | Mapk1ip1      | 1,03 | No  |
| ENSMUSG00000041777 | -1,67E-03 | 3,317421669  | 2,62E-04 | 9,87E-01 | 1,00E+00 | Cir1          | 1,00 | No  |
| ENSMUSG00000041779 | 4,16E-01  | 3,191238636  | 1,45E+01 | 1,41E-04 | 3,23E-03 | Tram2         | 1,33 | Yes |
| ENSMUSG00000041781 | 2,44E-01  | 5,96489806   | 1,39E+01 | 1,95E-04 | 4,26E-03 | Cpsf2         | 1,18 | Yes |
| ENSMUSG00000041782 | -8,68E-01 | 3,984860766  | 9,84E+01 | 3,44E-23 | 1,07E-20 | Lad1          | 0,55 | Yes |
| ENSMUSG00000041789 | -3,85E+00 | -2,548183328 | 7,08E+00 | 7,81E-03 | 7,76E-02 | 2700046A07Rik | 0,07 | No  |
| ENSMUSG00000041794 | 4,51E-01  | 2,415999973  | 1,16E+01 | 6,43E-04 | 1,13E-02 | Myrip         | 1,37 | Yes |
| ENSMUSG00000041797 | 5,42E-02  | 2,008534793  | 1,33E-01 | 7,16E-01 | 9,13E-01 | Abca9         | 1,04 | No  |
| ENSMUSG00000041798 | 6,23E-01  | -2,146227321 | 7,86E-01 | 3,75E-01 | 6,76E-01 | Gck           | 1,54 | No  |
| ENSMUSG00000041801 | 1,28E-02  | 5,740654386  | 3,61E-02 | 8,49E-01 | 9,89E-01 | Phlda3        | 1,01 | No  |
| ENSMUSG00000041809 | 8,58E-02  | -0,880007541 | 5,06E-02 | 8,22E-01 | 9,72E-01 | Efhc1         | 1,06 | No  |
| ENSMUSG00000041815 | -2,54E-02 | 7,099709611  | 1,77E-01 | 6,74E-01 | 8,90E-01 | Poldip3       | 0,98 | No  |
| ENSMUSG00000041817 | -1,25E-01 | 2,959949153  | 1,20E+00 | 2,74E-01 | 5,70E-01 | Fam169a       | 0,92 | No  |
| ENSMUSG00000041827 | -7,05E-01 | 1,847299262  | 1,90E+01 | 1,30E-05 | 4,23E-04 | Oasl1         | 0,61 | Yes |

|                    |           |              |          |          |          |               |      |     |
|--------------------|-----------|--------------|----------|----------|----------|---------------|------|-----|
| ENSMUSG00000041828 | -1,35E+00 | -2,832022066 | 1,13E+00 | 2,87E-01 | 5,83E-01 | Abca8a        | 0,39 | No  |
| ENSMUSG00000041831 | 1,90E+00  | -2,185721494 | 3,53E+00 | 6,04E-02 | 3,04E-01 | Sytl3         | 3,73 | No  |
| ENSMUSG00000041836 | 2,62E-01  | 7,532939508  | 1,96E+01 | 9,76E-06 | 3,29E-04 | Ptpre         | 1,20 | Yes |
| ENSMUSG00000041837 | 7,34E-02  | 3,788519032  | 6,47E-01 | 4,21E-01 | 7,16E-01 | Pdcd7         | 1,05 | No  |
| ENSMUSG00000041840 | 3,06E-01  | 2,602705489  | 5,92E+00 | 1,49E-02 | 1,25E-01 | Haus1         | 1,24 | No  |
| ENSMUSG00000041841 | -3,03E-01 | 3,703661652  | 1,04E+01 | 1,26E-03 | 1,95E-02 | Rpl37         | 0,81 | Yes |
| ENSMUSG00000041842 | -1,62E-02 | -0,107425074 | 2,84E-03 | 9,58E-01 | 1,00E+00 | Fhdc1         | 0,99 | No  |
| ENSMUSG00000041845 | 1,86E-01  | 1,299170976  | 9,86E-01 | 3,21E-01 | 6,21E-01 | Rhod          | 1,14 | No  |
| ENSMUSG00000041846 | -1,38E-02 | 6,617377665  | 4,95E-02 | 8,24E-01 | 9,73E-01 | Ppp4r3a       | 0,99 | No  |
| ENSMUSG00000041849 | 1,32E-01  | 2,878778542  | 1,26E+00 | 2,62E-01 | 5,57E-01 | Card6         | 1,10 | No  |
| ENSMUSG00000041852 | -1,29E-01 | 6,628808496  | 4,29E+00 | 3,84E-02 | 2,32E-01 | Tcf20         | 0,91 | No  |
| ENSMUSG00000041857 | -7,66E-01 | -1,522661918 | 2,07E+00 | 1,50E-01 | 4,91E-01 | Oosp1         | 0,59 | No  |
| ENSMUSG00000041859 | 1,27E-01  | 6,783861     | 4,26E+00 | 3,90E-02 | 2,34E-01 | Mcm3          | 1,09 | No  |
| ENSMUSG00000041870 | -7,59E-02 | 8,197378321  | 1,72E+00 | 1,89E-01 | 5,50E-01 | Ankrd13a      | 0,95 | No  |
| ENSMUSG00000041872 | 1,24E+00  | -2,268225212 | 2,10E+00 | 1,48E-01 | 4,87E-01 | Il17f         | 2,36 | No  |
| ENSMUSG00000041878 | -5,48E-01 | -2,185621157 | 4,46E-01 | 5,04E-01 | 7,89E-01 | 8430432A02Rik | 0,68 | No  |
| ENSMUSG00000041879 | 2,04E-01  | 6,697459019  | 1,08E+01 | 9,93E-04 | 1,61E-02 | Ipo9          | 1,15 | Yes |
| ENSMUSG00000041881 | -3,03E-02 | 4,988609843  | 1,66E-01 | 6,84E-01 | 8,96E-01 | Ndufa7        | 0,98 | No  |
| ENSMUSG00000041886 | 1,32E+00  | -2,600704439 | 1,76E+00 | 1,84E-01 | 5,48E-01 | Macc1         | 2,49 | No  |
| ENSMUSG00000041889 | 5,19E-01  | 0,010766814  | 3,33E+00 | 6,82E-02 | 3,29E-01 | Shisa4        | 1,43 | No  |
| ENSMUSG00000041890 | 2,08E-02  | 6,740827874  | 1,15E-01 | 7,35E-01 | 9,24E-01 | Git2          | 1,01 | No  |
| ENSMUSG00000041891 | 1,19E-01  | 6,060126492  | 3,33E+00 | 6,80E-02 | 3,28E-01 | Lman1         | 1,09 | No  |
| ENSMUSG00000041895 | 7,35E-02  | 3,84815458   | 6,38E-01 | 4,24E-01 | 7,19E-01 | Wipi1         | 1,05 | No  |
| ENSMUSG00000041907 | -2,71E+00 | -3,033620915 | 2,92E+00 | 8,75E-02 | 3,78E-01 | Gpr45         | 0,15 | No  |
| ENSMUSG00000041911 | 1,82E+00  | -3,033667329 | 1,31E+00 | 2,52E-01 | 5,50E-01 | Dlx1          | 3,54 | No  |
| ENSMUSG00000041912 | -1,02E-01 | 1,891489341  | 4,54E-01 | 5,01E-01 | 7,86E-01 | Tdrkh         | 0,93 | No  |
| ENSMUSG00000041915 | 1,00E-01  | 6,211921334  | 2,46E+00 | 1,17E-01 | 4,23E-01 | Ammecr1l      | 1,07 | No  |
| ENSMUSG00000041920 | -1,61E-01 | 5,226608342  | 4,91E+00 | 2,68E-02 | 1,83E-01 | Slc16a6       | 0,89 | No  |
| ENSMUSG00000041921 | 1,15E-01  | 3,630120452  | 1,43E+00 | 2,32E-01 | 5,50E-01 | Metap1d       | 1,08 | No  |
| ENSMUSG00000041923 | 8,29E-01  | -2,185717273 | 1,05E+00 | 3,05E-01 | 6,02E-01 | Nol4          | 1,78 | No  |
| ENSMUSG00000041926 | 7,11E-02  | 6,804328726  | 1,34E+00 | 2,47E-01 | 5,50E-01 | Rnpep         | 1,05 | No  |
| ENSMUSG00000041930 | 5,00E-01  | -1,378226832 | 9,15E-01 | 3,39E-01 | 6,39E-01 | Fam222a       | 1,41 | No  |

|                    |           |              |          |          |          |               |      |     |
|--------------------|-----------|--------------|----------|----------|----------|---------------|------|-----|
| ENSMUSG00000041935 | -2,14E-02 | 6,289755808  | 1,13E-01 | 7,37E-01 | 9,25E-01 | AW549877      | 0,99 | No  |
| ENSMUSG00000041936 | 4,31E-02  | 4,634851726  | 2,98E-01 | 5,85E-01 | 8,39E-01 | Agrrn         | 1,03 | No  |
| ENSMUSG00000041939 | 2,33E-01  | 4,448829217  | 8,22E+00 | 4,14E-03 | 4,85E-02 | Mvk           | 1,18 | Yes |
| ENSMUSG00000041945 | -8,32E-02 | 1,223887048  | 1,90E-01 | 6,63E-01 | 8,83E-01 | Mfsd9         | 0,94 | No  |
| ENSMUSG00000041949 | 2,74E-01  | 2,327486266  | 3,90E+00 | 4,83E-02 | 2,64E-01 | Tango6        | 1,21 | No  |
| ENSMUSG00000041954 | -6,87E-01 | 3,795882404  | 5,68E+01 | 4,81E-14 | 6,81E-12 | Tnfrsf18      | 0,62 | Yes |
| ENSMUSG00000041957 | 1,30E-01  | 3,217016988  | 1,51E+00 | 2,18E-01 | 5,50E-01 | Pkp2          | 1,09 | No  |
| ENSMUSG00000041958 | 1,21E-01  | 6,492657855  | 3,73E+00 | 5,33E-02 | 2,82E-01 | Pigs          | 1,09 | No  |
| ENSMUSG00000041959 | -7,48E-02 | 8,444328565  | 1,69E+00 | 1,93E-01 | 5,50E-01 | S100a10       | 0,95 | No  |
| ENSMUSG00000041961 | 5,20E-01  | 1,987804789  | 1,18E+01 | 5,91E-04 | 1,05E-02 | Znrf3         | 1,43 | Yes |
| ENSMUSG00000041966 | 1,17E-01  | 4,198322409  | 1,92E+00 | 1,66E-01 | 5,19E-01 | Dcaf17        | 1,08 | No  |
| ENSMUSG00000041974 | 8,23E-02  | 4,475847274  | 1,04E+00 | 3,08E-01 | 6,07E-01 | Spidr         | 1,06 | No  |
| ENSMUSG00000041975 | 9,41E-02  | 3,277336213  | 8,22E-01 | 3,65E-01 | 6,66E-01 | Mettl8        | 1,07 | No  |
| ENSMUSG00000041977 | 1,19E-01  | 6,114756509  | 3,32E+00 | 6,84E-02 | 3,29E-01 | Arhgef11      | 1,09 | No  |
| ENSMUSG00000041991 | -4,53E-01 | -2,655134659 | 2,10E-01 | 6,47E-01 | 8,74E-01 | Hrnr          | 0,73 | No  |
| ENSMUSG00000041992 | -2,49E-02 | 3,182215031  | 5,28E-02 | 8,18E-01 | 9,70E-01 | Rapgef5       | 0,98 | No  |
| ENSMUSG00000041995 | 3,40E-02  | 3,739851556  | 1,28E-01 | 7,20E-01 | 9,15E-01 | Zbed3         | 1,02 | No  |
| ENSMUSG00000041997 | -3,93E-02 | 6,341885665  | 3,83E-01 | 5,36E-01 | 8,08E-01 | Tlk1          | 0,97 | No  |
| ENSMUSG00000042010 | 2,01E-01  | 0,997626585  | 8,14E-01 | 3,67E-01 | 6,68E-01 | Acacb         | 1,15 | No  |
| ENSMUSG00000042015 | 1,49E-01  | 5,38159215   | 4,48E+00 | 3,43E-02 | 2,18E-01 | Wdr41         | 1,11 | No  |
| ENSMUSG00000042029 | 2,84E-01  | 6,018085515  | 1,89E+01 | 1,40E-05 | 4,51E-04 | Ncapg2        | 1,22 | Yes |
| ENSMUSG00000042032 | -8,79E-02 | 6,029494259  | 1,82E+00 | 1,77E-01 | 5,37E-01 | Mat2b         | 0,94 | No  |
| ENSMUSG00000042035 | -4,62E-01 | 1,949933952  | 9,64E+00 | 1,90E-03 | 2,69E-02 | Igsf3         | 0,73 | Yes |
| ENSMUSG00000042041 | -3,56E+00 | -2,896109226 | 5,70E+00 | 1,70E-02 | 1,36E-01 | 2010003K11Rik | 0,08 | No  |
| ENSMUSG00000042042 | 2,44E-02  | 5,801705707  | 1,34E-01 | 7,15E-01 | 9,12E-01 | Csgalnact2    | 1,02 | No  |
| ENSMUSG00000042043 | 4,00E-02  | 3,914274645  | 1,98E-01 | 6,57E-01 | 8,80E-01 | Tbca          | 1,03 | No  |
| ENSMUSG00000042046 | 3,22E-03  | 5,28671229   | 2,07E-03 | 9,64E-01 | 1,00E+00 | Dstyk         | 1,00 | No  |
| ENSMUSG00000042050 | 1,12E-01  | 2,187069845  | 6,04E-01 | 4,37E-01 | 7,30E-01 | Wdr60         | 1,08 | No  |
| ENSMUSG00000042055 | -2,63E-02 | 5,864351463  | 1,57E-01 | 6,92E-01 | 9,00E-01 | Wdr11         | 0,98 | No  |
| ENSMUSG00000042063 | 2,08E-03  | 4,747725513  | 7,33E-04 | 9,78E-01 | 1,00E+00 | Zfp386        | 1,00 | No  |
| ENSMUSG00000042064 | 1,55E-01  | -2,107565084 | 4,16E-02 | 8,38E-01 | 9,82E-01 | Myo3b         | 1,11 | No  |
| ENSMUSG00000042066 | -3,19E-02 | 2,420611884  | 6,04E-02 | 8,06E-01 | 9,63E-01 | Tmcc2         | 0,98 | No  |

|                    |           |              |           |          |          |               |      |     |
|--------------------|-----------|--------------|-----------|----------|----------|---------------|------|-----|
| ENSMUSG00000042073 | -1,15E-01 | 3,409806258  | 1,31E+00  | 2,52E-01 | 5,50E-01 | Abhd14b       | 0,92 | No  |
| ENSMUSG00000042078 | 4,87E-01  | -1,711701943 | 6,93E-01  | 4,05E-01 | 7,02E-01 | Svop          | 1,40 | No  |
| ENSMUSG00000042079 | 3,79E-02  | 8,284776387  | 4,32E-01  | 5,11E-01 | 7,94E-01 | Hnrnpf        | 1,03 | No  |
| ENSMUSG00000042082 | 3,18E-01  | 4,77138314   | 1,68E+01  | 4,24E-05 | 1,18E-03 | Arsb          | 1,25 | Yes |
| ENSMUSG00000042087 | -4,46E-02 | 3,680437359  | 2,16E-01  | 6,42E-01 | 8,71E-01 | 4933440N22Rik | 0,97 | No  |
| ENSMUSG00000042096 | -9,21E-01 | -1,401370707 | 3,71E+00  | 5,40E-02 | 2,84E-01 | Dao           | 0,53 | No  |
| ENSMUSG00000042097 | -7,46E-02 | -0,257667494 | 5,16E-02  | 8,20E-01 | 9,71E-01 | Zfp239        | 0,95 | No  |
| ENSMUSG00000042099 | -2,67E-02 | 4,771720898  | 1,21E-01  | 7,28E-01 | 9,20E-01 | Kank3         | 0,98 | No  |
| ENSMUSG00000042102 | 3,14E-02  | -3,107617333 | -7,69E-10 | 1,00E+00 | 1,00E+00 | Dmgdh         | 1,02 | No  |
| ENSMUSG00000042104 | 2,77E-01  | 0,103654973  | 9,68E-01  | 3,25E-01 | 6,26E-01 | Uggt2         | 1,21 | No  |
| ENSMUSG00000042105 | -3,78E-02 | 5,683570751  | 3,13E-01  | 5,76E-01 | 8,34E-01 | Inpp5f        | 0,97 | No  |
| ENSMUSG00000042106 | -1,45E-01 | 0,844350771  | 4,87E-01  | 4,85E-01 | 7,73E-01 | Fam212a       | 0,90 | No  |
| ENSMUSG00000042109 | -2,14E+00 | -1,831966423 | 8,13E+00  | 4,36E-03 | 5,04E-02 | Csdc2         | 0,23 | No  |
| ENSMUSG00000042111 | -2,06E-02 | 5,870293528  | 9,60E-02  | 7,57E-01 | 9,35E-01 | Ccdc115       | 0,99 | No  |
| ENSMUSG00000042115 | 7,05E-01  | -2,83200187  | 2,71E-01  | 6,03E-01 | 8,48E-01 | Klhdc8a       | 1,63 | No  |
| ENSMUSG00000042116 | 3,23E-01  | -0,793322198 | 6,67E-01  | 4,14E-01 | 7,09E-01 | Vwa1          | 1,25 | No  |
| ENSMUSG00000042121 | -3,62E-01 | 6,250828983  | 3,22E+01  | 1,37E-08 | 9,21E-07 | Ssh1          | 0,78 | Yes |
| ENSMUSG00000042129 | 2,40E-01  | 9,179184299  | 1,79E+01  | 2,35E-05 | 7,15E-04 | Rassf4        | 1,18 | Yes |
| ENSMUSG00000042133 | -5,77E-02 | 6,105108088  | 7,85E-01  | 3,76E-01 | 6,76E-01 | Ppig          | 0,96 | No  |
| ENSMUSG00000042138 | 1,44E-01  | 2,97797732   | 1,67E+00  | 1,96E-01 | 5,50E-01 | Msantd2       | 1,11 | No  |
| ENSMUSG00000042148 | 2,69E-01  | 4,221582011  | 9,95E+00  | 1,61E-03 | 2,35E-02 | Cox10         | 1,21 | Yes |
| ENSMUSG00000042155 | 7,99E-02  | 1,399263741  | 1,92E-01  | 6,61E-01 | 8,82E-01 | Klhl23        | 1,06 | No  |
| ENSMUSG00000042156 | -8,06E-01 | 0,997397438  | 1,54E+01  | 8,54E-05 | 2,13E-03 | Dzip1         | 0,57 | Yes |
| ENSMUSG00000042165 | -7,10E-02 | 6,110123768  | 1,20E+00  | 2,74E-01 | 5,70E-01 | Gm9774        | 0,95 | No  |
| ENSMUSG00000042167 | -9,20E-02 | 5,980571084  | 1,96E+00  | 1,61E-01 | 5,10E-01 | Papd4         | 0,94 | No  |
| ENSMUSG00000042178 | -8,24E-03 | 5,360464697  | 1,35E-02  | 9,07E-01 | 1,00E+00 | Armc5         | 0,99 | No  |
| ENSMUSG00000042182 | 3,85E-01  | 1,786543978  | 5,28E+00  | 2,16E-02 | 1,58E-01 | Bend6         | 1,31 | No  |
| ENSMUSG00000042185 | 4,17E-02  | 5,21419985   | 3,40E-01  | 5,60E-01 | 8,23E-01 | Nfrkb         | 1,03 | No  |
| ENSMUSG00000042189 | 1,14E+00  | -2,600691052 | 1,24E+00  | 2,65E-01 | 5,60E-01 | Tekt3         | 2,21 | No  |
| ENSMUSG00000042190 | 3,49E-01  | 7,274875952  | 3,38E+01  | 6,05E-09 | 4,38E-07 | Cmklr1        | 1,27 | Yes |
| ENSMUSG00000042195 | 5,25E-01  | -1,655161678 | 9,43E-01  | 3,32E-01 | 6,32E-01 | Slc35f2       | 1,44 | No  |
| ENSMUSG00000042197 | 3,22E-02  | 5,754229564  | 2,31E-01  | 6,31E-01 | 8,63E-01 | Zfp451        | 1,02 | No  |

|                    |           |              |          |          |          |               |      |     |
|--------------------|-----------|--------------|----------|----------|----------|---------------|------|-----|
| ENSMUSG00000042198 | -5,06E-02 | 3,585867972  | 2,74E-01 | 6,01E-01 | 8,47E-01 | Chchd7        | 0,97 | No  |
| ENSMUSG00000042202 | 1,41E-01  | 4,40432434   | 3,00E+00 | 8,31E-02 | 3,70E-01 | Slc35e2       | 1,10 | No  |
| ENSMUSG00000042203 | 6,54E-02  | 4,869167319  | 7,44E-01 | 3,88E-01 | 6,88E-01 | Tbc1d22b      | 1,05 | No  |
| ENSMUSG00000042207 | -1,78E-01 | 4,395836523  | 4,78E+00 | 2,88E-02 | 1,93E-01 | Kdm5b         | 0,88 | No  |
| ENSMUSG00000042208 | 7,38E-02  | 5,427453426  | 1,12E+00 | 2,90E-01 | 5,86E-01 | O610010F05Rik | 1,05 | No  |
| ENSMUSG00000042210 | 8,94E-02  | 2,616452371  | 5,01E-01 | 4,79E-01 | 7,66E-01 | Abhd14a       | 1,06 | No  |
| ENSMUSG00000042211 | 1,55E-02  | 6,014012932  | 5,67E-02 | 8,12E-01 | 9,67E-01 | Fbxo38        | 1,01 | No  |
| ENSMUSG00000042213 | 1,83E-01  | 2,956959547  | 2,63E+00 | 1,05E-01 | 3,97E-01 | Zfand4        | 1,14 | No  |
| ENSMUSG00000042215 | 1,96E-01  | 2,925493317  | 2,91E+00 | 8,80E-02 | 3,79E-01 | Bag2          | 1,15 | No  |
| ENSMUSG00000042216 | 4,11E-01  | 1,136099039  | 4,18E+00 | 4,09E-02 | 2,40E-01 | Sgsm1         | 1,33 | No  |
| ENSMUSG00000042228 | 2,00E-01  | 7,47448762   | 1,13E+01 | 7,89E-04 | 1,33E-02 | Lyn           | 1,15 | Yes |
| ENSMUSG00000042229 | -4,26E-02 | 4,656358372  | 2,94E-01 | 5,88E-01 | 8,40E-01 | Rabif         | 0,97 | No  |
| ENSMUSG00000042246 | -1,09E-01 | -2,71174857  | 7,86E-03 | 9,29E-01 | 1,00E+00 | Tmc7          | 0,93 | No  |
| ENSMUSG00000042249 | -2,79E-01 | 7,104015648  | 2,15E+01 | 3,56E-06 | 1,36E-04 | Grk3          | 0,82 | Yes |
| ENSMUSG00000042250 | -1,87E+00 | -3,107637761 | 1,39E+00 | 2,38E-01 | 5,50E-01 | Pglyrp4       | 0,27 | No  |
| ENSMUSG00000042251 | -4,86E-01 | 0,236943162  | 3,36E+00 | 6,67E-02 | 3,25E-01 | Pm20d1        | 0,71 | No  |
| ENSMUSG00000042254 | 1,87E+00  | -3,107639691 | 1,38E+00 | 2,40E-01 | 5,50E-01 | Cilp          | 3,67 | No  |
| ENSMUSG00000042265 | -2,56E-01 | 5,339575126  | 1,27E+01 | 3,66E-04 | 7,11E-03 | Trem1         | 0,84 | Yes |
| ENSMUSG00000042268 | 3,42E-01  | -1,051861663 | 6,87E-01 | 4,07E-01 | 7,04E-01 | Slc26a9       | 1,27 | No  |
| ENSMUSG00000042269 | 3,86E-01  | -2,711735111 | 1,16E-01 | 7,34E-01 | 9,23E-01 | Fam92b        | 1,31 | No  |
| ENSMUSG00000042272 | 8,64E-02  | 6,141550545  | 1,80E+00 | 1,80E-01 | 5,42E-01 | Sestd1        | 1,06 | No  |
| ENSMUSG00000042275 | -3,30E-02 | 3,197803763  | 9,28E-02 | 7,61E-01 | 9,37E-01 | Pelo          | 0,98 | No  |
| ENSMUSG00000042279 | 7,57E-01  | -1,44869789  | 1,93E+00 | 1,65E-01 | 5,17E-01 | H1foo         | 1,69 | No  |
| ENSMUSG00000042284 | 9,59E-02  | 6,848409342  | 2,44E+00 | 1,18E-01 | 4,27E-01 | Itga1         | 1,07 | No  |
| ENSMUSG00000042286 | 3,87E-02  | 4,048282612  | 1,90E-01 | 6,63E-01 | 8,83E-01 | Stab1         | 1,03 | No  |
| ENSMUSG00000042289 | -7,10E-02 | 4,628777466  | 8,24E-01 | 3,64E-01 | 6,65E-01 | Hsd3b7        | 0,95 | No  |
| ENSMUSG00000042292 | 1,33E-03  | 7,205685259  | 4,94E-04 | 9,82E-01 | 1,00E+00 | Mkl1          | 1,00 | No  |
| ENSMUSG00000042293 | -1,51E-01 | 1,935694833  | 9,44E-01 | 3,31E-01 | 6,32E-01 | Gm5617        | 0,90 | No  |
| ENSMUSG00000042298 | 2,64E-02  | 3,940230223  | 8,63E-02 | 7,69E-01 | 9,42E-01 | Ttc19         | 1,02 | No  |
| ENSMUSG00000042302 | 1,96E-01  | 4,593386472  | 6,07E+00 | 1,37E-02 | 1,18E-01 | Ehbp1         | 1,15 | No  |
| ENSMUSG00000042303 | 2,47E-01  | 4,865134435  | 1,05E+01 | 1,18E-03 | 1,86E-02 | Sgsm3         | 1,19 | Yes |
| ENSMUSG00000042305 | -1,43E-02 | 5,833986777  | 4,65E-02 | 8,29E-01 | 9,77E-01 | Tmem183a      | 0,99 | No  |



|                    |           |              |          |          |          |          |      |     |
|--------------------|-----------|--------------|----------|----------|----------|----------|------|-----|
| ENSMUSG00000042306 | -7,58E-02 | -2,268073675 | 9,32E-03 | 9,23E-01 | 1,00E+00 | S100a14  | 0,95 | No  |
| ENSMUSG00000042308 | 3,86E-03  | 5,867099618  | 3,36E-03 | 9,54E-01 | 1,00E+00 | Setd1a   | 1,00 | No  |
| ENSMUSG00000042312 | -5,35E-02 | 5,208128195  | 5,57E-01 | 4,55E-01 | 7,45E-01 | S100a13  | 0,96 | No  |
| ENSMUSG00000042320 | 7,75E-02  | 1,585317268  | 2,14E-01 | 6,44E-01 | 8,72E-01 | Prox2    | 1,06 | No  |
| ENSMUSG00000042323 | 6,28E-02  | 6,83172623   | 1,05E+00 | 3,06E-01 | 6,03E-01 | Pbrm1    | 1,04 | No  |
| ENSMUSG00000042328 | 8,85E-02  | 4,818609928  | 1,36E+00 | 2,43E-01 | 5,50E-01 | Hps4     | 1,06 | No  |
| ENSMUSG00000042331 | 1,20E-01  | 6,136371191  | 3,47E+00 | 6,26E-02 | 3,12E-01 | Specc1   | 1,09 | No  |
| ENSMUSG00000042333 | 1,81E-01  | 3,638860742  | 3,63E+00 | 5,68E-02 | 2,93E-01 | Tnfrsf14 | 1,13 | No  |
| ENSMUSG00000042340 | 7,46E-01  | -2,770613093 | 3,02E-01 | 5,82E-01 | 8,38E-01 | Ctf1     | 1,68 | No  |
| ENSMUSG00000042345 | -9,77E-01 | -2,4486688   | 1,16E+00 | 2,82E-01 | 5,79E-01 | Ubash3a  | 0,51 | No  |
| ENSMUSG00000042348 | 1,77E-01  | 3,277657273  | 2,72E+00 | 9,93E-02 | 3,92E-01 | Arl15    | 1,13 | No  |
| ENSMUSG00000042349 | -2,36E-01 | 6,01120554   | 1,32E+01 | 2,73E-04 | 5,63E-03 | lkbke    | 0,85 | Yes |
| ENSMUSG00000042350 | 1,66E-02  | 6,05995829   | 6,52E-02 | 7,98E-01 | 9,59E-01 | Arel1    | 1,01 | No  |
| ENSMUSG00000042351 | 2,99E-01  | 4,370237089  | 1,28E+01 | 3,52E-04 | 6,89E-03 | Grap2    | 1,23 | Yes |
| ENSMUSG00000042354 | 5,26E-03  | 5,410845712  | 5,59E-03 | 9,40E-01 | 1,00E+00 | Gn13     | 1,00 | No  |
| ENSMUSG00000042359 | -2,80E-02 | -0,436650935 | 6,45E-03 | 9,36E-01 | 1,00E+00 | Osbp16   | 0,98 | No  |
| ENSMUSG00000042363 | -7,53E-02 | 2,882997921  | 4,25E-01 | 5,14E-01 | 7,96E-01 | Lgalsl   | 0,95 | No  |
| ENSMUSG00000042364 | -4,60E-02 | 6,267667721  | 5,16E-01 | 4,72E-01 | 7,60E-01 | Snx18    | 0,97 | No  |
| ENSMUSG00000042367 | -5,88E-02 | -3,033616507 | 1,62E-03 | 9,68E-01 | 1,00E+00 | Gjb3     | 0,96 | No  |
| ENSMUSG00000042369 | -3,05E-02 | 4,91012391   | 1,67E-01 | 6,83E-01 | 8,95E-01 | Rbm45    | 0,98 | No  |
| ENSMUSG00000042371 | 8,46E-01  | -2,401378208 | 8,60E-01 | 3,54E-01 | 6,55E-01 | Slc5a10  | 1,80 | No  |
| ENSMUSG00000042372 | -1,87E+00 | -3,107637761 | 1,39E+00 | 2,38E-01 | 5,50E-01 | Dmrt3    | 0,27 | No  |
| ENSMUSG00000042377 | 7,57E-01  | -2,401435727 | 7,61E-01 | 3,83E-01 | 6,85E-01 | Fam83g   | 1,69 | No  |
| ENSMUSG00000042380 | -7,00E-02 | 4,521184998  | 7,54E-01 | 3,85E-01 | 6,86E-01 | Smim12   | 0,95 | No  |
| ENSMUSG00000042385 | -2,65E+00 | -3,033633091 | 2,78E+00 | 9,55E-02 | 3,86E-01 | Gzmk     | 0,16 | No  |
| ENSMUSG00000042388 | -1,38E+00 | 0,359085868  | 2,92E+01 | 6,61E-08 | 3,83E-06 | Dlgap3   | 0,38 | Yes |
| ENSMUSG00000042389 | 7,70E-02  | 2,215706092  | 3,01E-01 | 5,83E-01 | 8,38E-01 | Tsen2    | 1,05 | No  |
| ENSMUSG00000042390 | -4,86E-02 | 6,788342128  | 6,28E-01 | 4,28E-01 | 7,22E-01 | Gatad2b  | 0,97 | No  |
| ENSMUSG00000042396 | 2,72E-02  | 6,41017548   | 1,86E-01 | 6,67E-01 | 8,86E-01 | Rbm7     | 1,02 | No  |
| ENSMUSG00000042401 | -1,32E+00 | -2,896135995 | 1,09E+00 | 2,97E-01 | 5,93E-01 | Crtac1   | 0,40 | No  |
| ENSMUSG00000042404 | 7,54E-02  | 6,945400329  | 1,54E+00 | 2,15E-01 | 5,50E-01 | Dennd4b  | 1,05 | No  |
| ENSMUSG00000042406 | -4,55E-02 | 7,787708594  | 6,01E-01 | 4,38E-01 | 7,31E-01 | Atf4     | 0,97 | No  |

|                    |           |              |           |          |          |          |      |     |
|--------------------|-----------|--------------|-----------|----------|----------|----------|------|-----|
| ENSMUSG00000042408 | -2,76E-03 | 4,439353758  | 1,17E-03  | 9,73E-01 | 1,00E+00 | Zmym6    | 1,00 | No  |
| ENSMUSG00000042410 | 4,74E-02  | 7,194795939  | 6,24E-01  | 4,29E-01 | 7,23E-01 | Agps     | 1,03 | No  |
| ENSMUSG00000042414 | 7,25E-01  | -2,896182007 | 2,86E-01  | 5,93E-01 | 8,42E-01 | Prdm14   | 1,65 | No  |
| ENSMUSG00000042417 | -9,63E-02 | 1,6554297    | 3,35E-01  | 5,63E-01 | 8,26E-01 | Ccno     | 0,94 | No  |
| ENSMUSG00000042419 | -2,35E-01 | 4,014807266  | 7,20E+00  | 7,30E-03 | 7,41E-02 | Nfkbil1  | 0,85 | No  |
| ENSMUSG00000042423 | -6,31E-03 | 7,002870999  | 1,09E-02  | 9,17E-01 | 1,00E+00 | Fbrs     | 1,00 | No  |
| ENSMUSG00000042426 | 7,85E-02  | 5,18551344   | 1,20E+00  | 2,74E-01 | 5,70E-01 | Dhx29    | 1,06 | No  |
| ENSMUSG00000042428 | -1,37E+00 | -0,484924239 | 1,49E+01  | 1,15E-04 | 2,73E-03 | Mgat3    | 0,39 | Yes |
| ENSMUSG00000042429 | 1,81E+00  | -3,10765737  | 1,28E+00  | 2,58E-01 | 5,50E-01 | Adora1   | 3,49 | No  |
| ENSMUSG00000042436 | -2,78E-01 | -0,98036455  | 4,63E-01  | 4,96E-01 | 7,81E-01 | Mfap4    | 0,82 | No  |
| ENSMUSG00000042439 | 2,49E-01  | 3,800847471  | 7,10E+00  | 7,71E-03 | 7,69E-02 | Zfp532   | 1,19 | No  |
| ENSMUSG00000042444 | 1,94E-01  | 6,241939717  | 9,27E+00  | 2,33E-03 | 3,16E-02 | Mindy2   | 1,14 | Yes |
| ENSMUSG00000042446 | -1,23E-01 | 4,92427762   | 2,71E+00  | 9,96E-02 | 3,92E-01 | Zmym4    | 0,92 | No  |
| ENSMUSG00000042447 | -1,27E-02 | 3,96643183   | 2,04E-02  | 8,87E-01 | 1,00E+00 | Mios     | 0,99 | No  |
| ENSMUSG00000042448 | 9,01E-03  | -3,107646452 | -5,16E-10 | 1,00E+00 | 1,00E+00 | Hoxd1    | 1,01 | No  |
| ENSMUSG00000042451 | 1,87E+00  | -3,107639691 | 1,38E+00  | 2,40E-01 | 5,50E-01 | Mybph    | 3,67 | No  |
| ENSMUSG00000042453 | -7,38E-02 | -3,033634644 | 2,66E-03  | 9,59E-01 | 1,00E+00 | Reln     | 0,95 | No  |
| ENSMUSG00000042460 | 1,25E-01  | 5,608632842  | 3,34E+00  | 6,75E-02 | 3,27E-01 | C1galt1  | 1,09 | No  |
| ENSMUSG00000042462 | 1,78E-01  | 4,626040975  | 4,98E+00  | 2,56E-02 | 1,78E-01 | Dctpp1   | 1,13 | No  |
| ENSMUSG00000042472 | 4,62E-03  | 5,173709143  | 4,12E-03  | 9,49E-01 | 1,00E+00 | Zfp410   | 1,00 | No  |
| ENSMUSG00000042474 | -5,65E-01 | -0,997934223 | 1,58E+00  | 2,08E-01 | 5,50E-01 | Fcmr     | 0,68 | No  |
| ENSMUSG00000042476 | 3,86E-01  | -0,621009193 | 1,05E+00  | 3,05E-01 | 6,03E-01 | Abcb4    | 1,31 | No  |
| ENSMUSG00000042477 | -6,18E-01 | -2,655166424 | 2,99E-01  | 5,85E-01 | 8,38E-01 | Tfap2e   | 0,65 | No  |
| ENSMUSG00000042485 | -6,77E-01 | -0,998103514 | 2,62E+00  | 1,05E-01 | 3,97E-01 | Mustn1   | 0,63 | No  |
| ENSMUSG00000042487 | 2,60E-02  | 4,040908378  | 8,57E-02  | 7,70E-01 | 9,42E-01 | Leo1     | 1,02 | No  |
| ENSMUSG00000042489 | 2,71E-01  | 5,250721263  | 1,44E+01  | 1,51E-04 | 3,41E-03 | Clspn    | 1,21 | Yes |
| ENSMUSG00000042492 | 1,24E-01  | 7,093218046  | 4,21E+00  | 4,02E-02 | 2,38E-01 | Tbc1d10b | 1,09 | No  |
| ENSMUSG00000042496 | 7,72E-02  | 4,384327649  | 8,87E-01  | 3,46E-01 | 6,47E-01 | Prdm10   | 1,05 | No  |
| ENSMUSG00000042500 | 9,53E-02  | 4,738922371  | 1,53E+00  | 2,16E-01 | 5,50E-01 | Ago4     | 1,07 | No  |
| ENSMUSG00000042501 | -5,88E-02 | -3,033652696 | 1,62E-03  | 9,68E-01 | 1,00E+00 | Cpa6     | 0,96 | No  |
| ENSMUSG00000042502 | -1,08E-01 | 6,085966134  | 2,76E+00  | 9,67E-02 | 3,88E-01 | Cd2bp2   | 0,93 | No  |
| ENSMUSG00000042505 | 1,48E-01  | 1,752682944  | 8,25E-01  | 3,64E-01 | 6,65E-01 | Sdhaf3   | 1,11 | No  |

|                    |           |              |          |          |          |               |      |     |
|--------------------|-----------|--------------|----------|----------|----------|---------------|------|-----|
| ENSMUSG00000042506 | 1,06E-01  | 6,457873164  | 2,83E+00 | 9,26E-02 | 3,83E-01 | Usp22         | 1,08 | No  |
| ENSMUSG00000042507 | -4,21E-02 | 6,788158814  | 4,65E-01 | 4,95E-01 | 7,81E-01 | Elmsan1       | 0,97 | No  |
| ENSMUSG00000042508 | -1,59E-01 | 5,649877898  | 5,53E+00 | 1,87E-02 | 1,45E-01 | Dmtf1         | 0,90 | No  |
| ENSMUSG00000042510 | -2,80E-01 | -0,497672099 | 6,10E-01 | 4,35E-01 | 7,28E-01 | AA986860      | 0,82 | No  |
| ENSMUSG00000042514 | -2,97E-01 | -2,800970853 | 7,51E-02 | 7,84E-01 | 9,51E-01 | Klhl14        | 0,81 | No  |
| ENSMUSG00000042520 | 6,88E-02  | 7,310991336  | 1,33E+00 | 2,50E-01 | 5,50E-01 | Ubap2l        | 1,05 | No  |
| ENSMUSG00000042523 | 2,54E-01  | 2,68992642   | 4,60E+00 | 3,19E-02 | 2,07E-01 | Dnal1         | 1,19 | No  |
| ENSMUSG00000042524 | 2,96E-02  | 7,686646507  | 2,54E-01 | 6,14E-01 | 8,53E-01 | Sun2          | 1,02 | No  |
| ENSMUSG00000042529 | 1,21E-02  | -3,033650469 | 7,34E-11 | 1,00E+00 | 1,00E+00 | Kcnj12        | 1,01 | No  |
| ENSMUSG00000042532 | -9,36E-01 | -0,682954634 | 6,57E+00 | 1,04E-02 | 9,60E-02 | Golga7b       | 0,52 | No  |
| ENSMUSG00000042535 | -1,73E-01 | 6,50388252   | 7,68E+00 | 5,58E-03 | 6,06E-02 | Gtpbp1        | 0,89 | No  |
| ENSMUSG00000042540 | -5,88E-02 | -3,033652696 | 1,62E-03 | 9,68E-01 | 1,00E+00 | Acot5         | 0,96 | No  |
| ENSMUSG00000042541 | -9,45E-03 | 6,686632001  | 2,33E-02 | 8,79E-01 | 1,00E+00 | Sem1          | 0,99 | No  |
| ENSMUSG00000042548 | 5,97E-02  | 6,432730673  | 9,00E-01 | 3,43E-01 | 6,43E-01 | Asxl1         | 1,04 | No  |
| ENSMUSG00000042549 | -9,81E-02 | -0,503801016 | 8,22E-02 | 7,74E-01 | 9,45E-01 | Map2k3os      | 0,93 | No  |
| ENSMUSG00000042557 | 1,74E-02  | 5,956375436  | 7,03E-02 | 7,91E-01 | 9,55E-01 | Sin3a         | 1,01 | No  |
| ENSMUSG00000042558 | 4,22E-02  | 4,947408489  | 3,19E-01 | 5,72E-01 | 8,32E-01 | Adprhl2       | 1,03 | No  |
| ENSMUSG00000042564 | 1,02E-01  | -0,216105576 | 1,09E-01 | 7,42E-01 | 9,27E-01 | Fam227a       | 1,07 | No  |
| ENSMUSG00000042567 | -2,03E-01 | -0,980582241 | 2,32E-01 | 6,30E-01 | 8,63E-01 | Nek10         | 0,87 | No  |
| ENSMUSG00000042569 | 1,18E-01  | 3,849007029  | 1,66E+00 | 1,97E-01 | 5,50E-01 | Dhrs7b        | 1,09 | No  |
| ENSMUSG00000042570 | 2,08E-01  | 4,791544001  | 7,43E+00 | 6,41E-03 | 6,73E-02 | Mier2         | 1,16 | No  |
| ENSMUSG00000042572 | -9,72E-02 | 6,787121709  | 2,50E+00 | 1,14E-01 | 4,16E-01 | Ube2q1        | 0,93 | No  |
| ENSMUSG00000042579 | 1,22E-01  | 1,965993395  | 6,99E-01 | 4,03E-01 | 7,01E-01 | 4632404H12Rik | 1,09 | No  |
| ENSMUSG00000042589 | -8,78E-01 | -0,963139848 | 4,26E+00 | 3,89E-02 | 2,34E-01 | Cux2          | 0,54 | No  |
| ENSMUSG00000042590 | 1,58E-01  | 4,43366219   | 3,80E+00 | 5,12E-02 | 2,75E-01 | Ipo11         | 1,12 | No  |
| ENSMUSG00000042594 | -7,01E-02 | 7,170803074  | 1,36E+00 | 2,43E-01 | 5,50E-01 | Sh2b3         | 0,95 | No  |
| ENSMUSG00000042599 | 2,69E-01  | 7,226395914  | 2,00E+01 | 7,87E-06 | 2,72E-04 | Kdm7a         | 1,21 | Yes |
| ENSMUSG00000042605 | -2,19E-02 | 5,603225459  | 1,02E-01 | 7,49E-01 | 9,31E-01 | Atxn2         | 0,98 | No  |
| ENSMUSG00000042606 | 1,04E-01  | 4,385477477  | 1,62E+00 | 2,03E-01 | 5,50E-01 | Hirip3        | 1,07 | No  |
| ENSMUSG00000042607 | 2,18E-01  | 2,960025912  | 3,72E+00 | 5,36E-02 | 2,83E-01 | Asb4          | 1,16 | No  |
| ENSMUSG00000042608 | -1,04E-02 | 6,051269564  | 2,57E-02 | 8,73E-01 | 1,00E+00 | Stk40         | 0,99 | No  |
| ENSMUSG00000042613 | -2,59E-01 | 7,861673346  | 1,96E+01 | 9,60E-06 | 3,25E-04 | Pbxip1        | 0,84 | Yes |

|                    |           |              |          |          |          |         |      |    |
|--------------------|-----------|--------------|----------|----------|----------|---------|------|----|
| ENSMUSG00000042616 | -1,75E-01 | 0,451903379  | 5,03E-01 | 4,78E-01 | 7,66E-01 | Oscp1   | 0,89 | No |
| ENSMUSG00000042622 | 4,38E-02  | 5,360516245  | 3,81E-01 | 5,37E-01 | 8,09E-01 | Maff    | 1,03 | No |
| ENSMUSG00000042625 | -4,12E-03 | 6,934190499  | 4,57E-03 | 9,46E-01 | 1,00E+00 | Safb2   | 1,00 | No |
| ENSMUSG00000042626 | 1,49E-01  | 7,253472673  | 6,21E+00 | 1,27E-02 | 1,11E-01 | Shc1    | 1,11 | No |
| ENSMUSG00000042628 | -1,23E-01 | 5,627593167  | 3,30E+00 | 6,93E-02 | 3,32E-01 | Zfyve1  | 0,92 | No |
| ENSMUSG00000042631 | -8,24E-01 | -2,831988991 | 3,73E-01 | 5,42E-01 | 8,11E-01 | Xkr7    | 0,56 | No |
| ENSMUSG00000042632 | 1,13E-01  | 3,401130078  | 1,22E+00 | 2,69E-01 | 5,65E-01 | Pla2g6  | 1,08 | No |
| ENSMUSG00000042638 | -1,42E+00 | -1,267886491 | 6,66E+00 | 9,84E-03 | 9,22E-02 | Gucy2c  | 0,37 | No |
| ENSMUSG00000042641 | 1,38E+00  | -1,62775734  | 4,94E+00 | 2,62E-02 | 1,81E-01 | Rgs1    | 2,61 | No |
| ENSMUSG00000042642 | 4,60E-02  | 4,984903627  | 3,88E-01 | 5,33E-01 | 8,06E-01 | Flad1   | 1,03 | No |
| ENSMUSG00000042644 | -1,07E-01 | 5,036061716  | 2,13E+00 | 1,44E-01 | 4,80E-01 | Itpr3   | 0,93 | No |
| ENSMUSG00000042647 | 7,02E-02  | 3,615022864  | 5,33E-01 | 4,66E-01 | 7,54E-01 | Acad12  | 1,05 | No |
| ENSMUSG00000042650 | 1,60E-01  | 6,879130235  | 6,84E+00 | 8,93E-03 | 8,58E-02 | Alkbh5  | 1,12 | No |
| ENSMUSG00000042655 | -2,68E+00 | -3,033645766 | 2,84E+00 | 9,17E-02 | 3,82E-01 | Fam159b | 0,16 | No |
| ENSMUSG00000042659 | -3,65E-02 | 6,023754669  | 3,12E-01 | 5,76E-01 | 8,35E-01 | Arrdc4  | 0,98 | No |
| ENSMUSG00000042660 | 1,03E-01  | 4,080932874  | 1,38E+00 | 2,39E-01 | 5,50E-01 | Wdr55   | 1,07 | No |
| ENSMUSG00000042662 | -5,77E-01 | -2,7706185   | 2,61E-01 | 6,09E-01 | 8,51E-01 | Dusp15  | 0,67 | No |
| ENSMUSG00000042670 | -3,25E-02 | 0,831820586  | 2,19E-02 | 8,82E-01 | 1,00E+00 | Imp1l   | 0,98 | No |
| ENSMUSG00000042671 | -3,18E+00 | -2,831985843 | 4,27E+00 | 3,87E-02 | 2,33E-01 | Rgs8    | 0,11 | No |
| ENSMUSG00000042672 | -2,17E-01 | -0,401352225 | 3,96E-01 | 5,29E-01 | 8,05E-01 | Dcst1   | 0,86 | No |
| ENSMUSG00000042675 | -1,28E-01 | 5,363930392  | 3,35E+00 | 6,74E-02 | 3,27E-01 | Ypel3   | 0,91 | No |
| ENSMUSG00000042677 | 7,06E-02  | 5,6055767    | 1,06E+00 | 3,03E-01 | 5,99E-01 | Zc3h12a | 1,05 | No |
| ENSMUSG00000042678 | 4,37E-01  | 0,736716305  | 3,77E+00 | 5,21E-02 | 2,78E-01 | Myo15   | 1,35 | No |
| ENSMUSG00000042680 | 6,59E-01  | -1,146235132 | 2,07E+00 | 1,51E-01 | 4,92E-01 | Garem1  | 1,58 | No |
| ENSMUSG00000042682 | 8,78E-02  | 4,797440554  | 1,30E+00 | 2,54E-01 | 5,50E-01 | Selenok | 1,06 | No |
| ENSMUSG00000042684 | 9,22E-02  | 1,997571038  | 3,71E-01 | 5,42E-01 | 8,12E-01 | Npl     | 1,07 | No |
| ENSMUSG00000042686 | -1,19E+00 | -2,311082735 | 1,83E+00 | 1,76E-01 | 5,35E-01 | Jph1    | 0,44 | No |
| ENSMUSG00000042688 | 1,17E-01  | 6,721364681  | 3,58E+00 | 5,86E-02 | 2,99E-01 | Mapk6   | 1,08 | No |
| ENSMUSG00000042694 | 2,15E-01  | 4,252520841  | 6,51E+00 | 1,07E-02 | 9,83E-02 | Stn1    | 1,16 | No |
| ENSMUSG00000042699 | 5,52E-02  | 7,473796459  | 8,68E-01 | 3,52E-01 | 6,53E-01 | Dhx9    | 1,04 | No |
| ENSMUSG00000042700 | -2,63E-02 | 4,392421922  | 1,04E-01 | 7,47E-01 | 9,30E-01 | Sipa111 | 0,98 | No |
| ENSMUSG00000042705 | 1,31E-01  | 4,69132831   | 2,82E+00 | 9,29E-02 | 3,83E-01 | Commd10 | 1,09 | No |

|                    |           |              |          |          |          |          |      |     |
|--------------------|-----------|--------------|----------|----------|----------|----------|------|-----|
| ENSMUSG00000042707 | 1,86E-01  | -1,32218157  | 1,37E-01 | 7,11E-01 | 9,11E-01 | Dnali1   | 1,14 | No  |
| ENSMUSG00000042708 | 2,10E-01  | 2,967473948  | 3,35E+00 | 6,74E-02 | 3,27E-01 | Shcbp1l  | 1,16 | No  |
| ENSMUSG00000042709 | -2,26E-02 | 4,303078939  | 7,28E-02 | 7,87E-01 | 9,53E-01 | Atpaf2   | 0,98 | No  |
| ENSMUSG00000042719 | 6,18E-02  | 4,925953748  | 6,78E-01 | 4,10E-01 | 7,07E-01 | Naa25    | 1,04 | No  |
| ENSMUSG00000042724 | -1,45E-01 | 2,488854283  | 1,20E+00 | 2,73E-01 | 5,69E-01 | Map3k9   | 0,90 | No  |
| ENSMUSG00000042726 | -1,77E-01 | 7,074025332  | 8,59E+00 | 3,38E-03 | 4,18E-02 | Trafd1   | 0,88 | Yes |
| ENSMUSG00000042729 | -1,69E-02 | 3,036923356  | 2,27E-02 | 8,80E-01 | 1,00E+00 | Wdr74    | 0,99 | No  |
| ENSMUSG00000042734 | -6,34E-01 | 0,095986248  | 5,04E+00 | 2,48E-02 | 1,74E-01 | Ttc9     | 0,64 | No  |
| ENSMUSG00000042737 | 2,33E-01  | 3,109030888  | 4,41E+00 | 3,58E-02 | 2,24E-01 | Dpm3     | 1,18 | No  |
| ENSMUSG00000042742 | 8,22E-02  | 5,997948473  | 1,60E+00 | 2,07E-01 | 5,50E-01 | Bmt2     | 1,06 | No  |
| ENSMUSG00000042743 | -1,75E-01 | 0,638730607  | 5,56E-01 | 4,56E-01 | 7,45E-01 | Sgtb     | 0,89 | No  |
| ENSMUSG00000042744 | 2,29E-03  | 6,314094783  | 1,29E-03 | 9,71E-01 | 1,00E+00 | Hectd4   | 1,00 | No  |
| ENSMUSG00000042745 | 5,48E-01  | 3,27121473   | 2,48E+01 | 6,22E-07 | 2,90E-05 | Id1      | 1,46 | Yes |
| ENSMUSG00000042747 | 7,90E-02  | 4,680865311  | 1,02E+00 | 3,13E-01 | 6,12E-01 | Krtcap2  | 1,06 | No  |
| ENSMUSG00000042751 | -3,58E+00 | -2,831988971 | 5,75E+00 | 1,65E-02 | 1,34E-01 | Nmnat2   | 0,08 | No  |
| ENSMUSG00000042757 | -5,42E-01 | -2,146095053 | 4,72E-01 | 4,92E-01 | 7,78E-01 | Tmem108  | 0,69 | No  |
| ENSMUSG00000042759 | 1,02E-01  | 6,822924664  | 2,76E+00 | 9,65E-02 | 3,88E-01 | Apobr    | 1,07 | No  |
| ENSMUSG00000042761 | -4,12E-01 | -1,997982224 | 3,53E-01 | 5,53E-01 | 8,19E-01 | Mrap2    | 0,75 | No  |
| ENSMUSG00000042763 | -1,01E+00 | -0,824009336 | 5,95E+00 | 1,47E-02 | 1,24E-01 | Maneal   | 0,49 | No  |
| ENSMUSG00000042766 | -3,92E-01 | 0,977528092  | 3,76E+00 | 5,25E-02 | 2,79E-01 | Trim46   | 0,76 | No  |
| ENSMUSG00000042770 | 1,97E-01  | 4,385983058  | 5,70E+00 | 1,69E-02 | 1,36E-01 | Hebp1    | 1,15 | No  |
| ENSMUSG00000042772 | -1,29E-02 | 6,209721479  | 4,03E-02 | 8,41E-01 | 9,84E-01 | Smg7     | 0,99 | No  |
| ENSMUSG00000042784 | 8,75E-02  | -1,770621411 | 2,05E-02 | 8,86E-01 | 1,00E+00 | Muc1     | 1,06 | No  |
| ENSMUSG00000042787 | 2,66E-01  | 3,544664547  | 7,53E+00 | 6,06E-03 | 6,47E-02 | Exog     | 1,20 | No  |
| ENSMUSG00000042788 | 2,73E-02  | -1,497680144 | 2,35E-03 | 9,61E-01 | 1,00E+00 | Fam166b  | 1,02 | No  |
| ENSMUSG00000042790 | -2,18E-02 | 4,706492879  | 7,91E-02 | 7,79E-01 | 9,47E-01 | Rnf214   | 0,98 | No  |
| ENSMUSG00000042793 | -2,02E+00 | -2,711712949 | 3,10E+00 | 7,81E-02 | 3,57E-01 | Lgr6     | 0,25 | No  |
| ENSMUSG00000042797 | -1,87E-01 | -0,929353705 | 1,88E-01 | 6,65E-01 | 8,84E-01 | Aqp11    | 0,88 | No  |
| ENSMUSG00000042800 | -7,11E-03 | -1,070157782 | 2,42E-04 | 9,88E-01 | 1,00E+00 | Spata46  | 1,00 | No  |
| ENSMUSG00000042801 | -1,94E+00 | -3,107619243 | 1,50E+00 | 2,21E-01 | 5,50E-01 | Olfir769 | 0,26 | No  |
| ENSMUSG00000042804 | 6,44E-02  | 1,027675671  | 9,94E-02 | 7,53E-01 | 9,33E-01 | Gpr153   | 1,05 | No  |
| ENSMUSG00000042807 | 2,41E-02  | -0,205773156 | 5,55E-03 | 9,41E-01 | 1,00E+00 | Hecw2    | 1,02 | No  |

|                    |           |              |          |          |          |               |      |     |
|--------------------|-----------|--------------|----------|----------|----------|---------------|------|-----|
| ENSMUSG00000042810 | -7,93E-01 | 2,267788698  | 3,48E+01 | 3,59E-09 | 2,69E-07 | Krba1         | 0,58 | Yes |
| ENSMUSG00000042812 | -5,82E-02 | -2,711732971 | 2,30E-03 | 9,62E-01 | 1,00E+00 | Foxf1         | 0,96 | No  |
| ENSMUSG00000042814 | 2,27E-01  | 2,099313042  | 2,36E+00 | 1,25E-01 | 4,42E-01 | Mcts2         | 1,17 | No  |
| ENSMUSG00000042816 | 5,43E-01  | -1,627780184 | 8,40E-01 | 3,59E-01 | 6,61E-01 | Gpr151        | 1,46 | No  |
| ENSMUSG00000042817 | -3,82E-02 | 3,615063149  | 1,53E-01 | 6,95E-01 | 9,02E-01 | Flt3          | 0,97 | No  |
| ENSMUSG00000042821 | -8,42E-02 | -1,424784396 | 2,99E-02 | 8,63E-01 | 9,97E-01 | Snai1         | 0,94 | No  |
| ENSMUSG00000042826 | -1,61E-01 | 0,957853601  | 5,70E-01 | 4,50E-01 | 7,40E-01 | Fgf11         | 0,89 | No  |
| ENSMUSG00000042828 | 4,11E-01  | -1,06089515  | 7,38E-01 | 3,90E-01 | 6,90E-01 | Trim72        | 1,33 | No  |
| ENSMUSG00000042831 | -2,41E-01 | 3,973727079  | 7,34E+00 | 6,76E-03 | 7,00E-02 | Alkbh6        | 0,85 | No  |
| ENSMUSG00000042834 | 2,13E-02  | 4,750218369  | 7,83E-02 | 7,80E-01 | 9,48E-01 | Nrep          | 1,01 | No  |
| ENSMUSG00000042842 | -1,02E+00 | 5,649924869  | 2,27E+02 | 2,84E-51 | 6,56E-48 | Serpnb6b      | 0,49 | Yes |
| ENSMUSG00000042851 | 7,92E-02  | 1,744458118  | 2,56E-01 | 6,13E-01 | 8,53E-01 | Zc3h6         | 1,06 | No  |
| ENSMUSG00000042854 | 6,59E-02  | 2,02721226   | 2,02E-01 | 6,53E-01 | 8,78E-01 | Trp53rkb      | 1,05 | No  |
| ENSMUSG00000042857 | 2,01E-01  | 2,731282631  | 2,64E+00 | 1,04E-01 | 3,97E-01 | Gm9776        | 1,15 | No  |
| ENSMUSG00000042870 | 2,13E-01  | 3,806877811  | 5,32E+00 | 2,11E-02 | 1,56E-01 | Tom1          | 1,16 | No  |
| ENSMUSG00000042873 | -8,95E-02 | -1,627581278 | 2,81E-02 | 8,67E-01 | 9,99E-01 | Lhfpl4        | 0,94 | No  |
| ENSMUSG00000042874 | -4,35E-02 | 1,854099034  | 7,65E-02 | 7,82E-01 | 9,50E-01 | D930007J09Rik | 0,97 | No  |
| ENSMUSG00000042895 | 4,90E-01  | -2,711685798 | 1,88E-01 | 6,65E-01 | 8,84E-01 | Abra          | 1,40 | No  |
| ENSMUSG00000042901 | 1,23E-02  | 5,640663999  | 3,25E-02 | 8,57E-01 | 9,94E-01 | Aida          | 1,01 | No  |
| ENSMUSG00000042909 | 8,30E-01  | -2,497611906 | 8,27E-01 | 3,63E-01 | 6,64E-01 | Olf648        | 1,78 | No  |
| ENSMUSG00000042918 | -1,03E+00 | 0,251921896  | 1,60E+01 | 6,48E-05 | 1,69E-03 | Mamstr        | 0,49 | Yes |
| ENSMUSG00000042938 | -1,20E-01 | 2,847279981  | 1,07E+00 | 3,00E-01 | 5,96E-01 | Gm14117       | 0,92 | No  |
| ENSMUSG00000042942 | -6,81E-01 | 0,045512525  | 5,93E+00 | 1,49E-02 | 1,25E-01 | Greb1l        | 0,62 | No  |
| ENSMUSG00000042961 | -1,89E+00 | -3,1076441   | 1,42E+00 | 2,33E-01 | 5,50E-01 | Egflam        | 0,27 | No  |
| ENSMUSG00000042962 | 1,44E-02  | 6,64370736   | 5,43E-02 | 8,16E-01 | 9,69E-01 | Gm5436        | 1,01 | No  |
| ENSMUSG00000042978 | 2,99E-01  | 4,901611615  | 1,55E+01 | 8,47E-05 | 2,11E-03 | Sbk1          | 1,23 | Yes |
| ENSMUSG00000042985 | -8,45E-01 | -2,963229433 | 3,92E-01 | 5,31E-01 | 8,05E-01 | Upk3b         | 0,56 | No  |
| ENSMUSG00000042992 | 1,32E-01  | 3,794680788  | 2,03E+00 | 1,54E-01 | 4,97E-01 | Borcs5        | 1,10 | No  |
| ENSMUSG00000042993 | 2,71E-01  | -0,980528771 | 3,67E-01 | 5,45E-01 | 8,13E-01 | lfnk          | 1,21 | No  |
| ENSMUSG00000042997 | 1,43E-01  | 6,006961185  | 4,78E+00 | 2,87E-02 | 1,93E-01 | Nhlrc3        | 1,10 | No  |
| ENSMUSG00000043004 | 1,47E-01  | 5,984152718  | 5,00E+00 | 2,54E-02 | 1,77E-01 | Gng2          | 1,11 | No  |
| ENSMUSG00000043008 | 1,31E-01  | 5,363271339  | 3,46E+00 | 6,31E-02 | 3,13E-01 | Klhl6         | 1,09 | No  |

|                    |           |              |           |          |          |               |      |     |
|--------------------|-----------|--------------|-----------|----------|----------|---------------|------|-----|
| ENSMUSG00000043013 | 2,06E-02  | -3,146103739 | -9,26E-10 | 1,00E+00 | 1,00E+00 | Onecut1       | 1,01 | No  |
| ENSMUSG00000043015 | 2,54E-01  | 3,532697579  | 6,90E+00  | 8,64E-03 | 8,38E-02 | Nemp2         | 1,19 | No  |
| ENSMUSG00000043017 | 3,40E-01  | 6,743068357  | 3,05E+01  | 3,35E-08 | 2,05E-06 | Ptgir         | 1,27 | Yes |
| ENSMUSG00000043019 | 2,05E-01  | 5,526962256  | 8,83E+00  | 2,97E-03 | 3,81E-02 | Edem3         | 1,15 | Yes |
| ENSMUSG00000043020 | -1,95E-01 | -1,54817401  | 1,19E-01  | 7,30E-01 | 9,21E-01 | Wdr63         | 0,87 | No  |
| ENSMUSG00000043024 | -1,72E-01 | 5,315449441  | 5,96E+00  | 1,47E-02 | 1,24E-01 | Gm16433       | 0,89 | No  |
| ENSMUSG00000043036 | 1,47E-01  | -1,185552034 | 1,03E-01  | 7,48E-01 | 9,30E-01 | Ccdc63        | 1,11 | No  |
| ENSMUSG00000043050 | -2,71E-01 | -1,49759944  | 2,57E-01  | 6,12E-01 | 8,52E-01 | Tnp2          | 0,83 | No  |
| ENSMUSG00000043051 | 2,63E-01  | 2,592261112  | 4,06E+00  | 4,40E-02 | 2,50E-01 | Disc1         | 1,20 | No  |
| ENSMUSG00000043059 | -7,78E-02 | 5,128797144  | 1,16E+00  | 2,81E-01 | 5,78E-01 | Zfp513        | 0,95 | No  |
| ENSMUSG00000043061 | -2,94E-02 | 4,696352391  | 1,46E-01  | 7,02E-01 | 9,05E-01 | Tmem18        | 0,98 | No  |
| ENSMUSG00000043065 | 1,82E-01  | 2,892837646  | 2,57E+00  | 1,09E-01 | 4,04E-01 | Spice1        | 1,13 | No  |
| ENSMUSG00000043067 | 1,91E-01  | 5,647673307  | 7,84E+00  | 5,11E-03 | 5,67E-02 | Dpy19l1       | 1,14 | No  |
| ENSMUSG00000043068 | -6,48E-01 | 1,18385193   | 1,16E+01  | 6,59E-04 | 1,15E-02 | Fam89a        | 0,64 | Yes |
| ENSMUSG00000043073 | -1,94E+00 | -3,107619243 | 1,50E+00  | 2,21E-01 | 5,50E-01 | Usp17le       | 0,26 | No  |
| ENSMUSG00000043079 | 2,48E-01  | 6,792855641  | 1,61E+01  | 5,97E-05 | 1,58E-03 | Synpo         | 1,19 | Yes |
| ENSMUSG00000043085 | -1,77E-01 | 2,578251813  | 1,88E+00  | 1,70E-01 | 5,26E-01 | Tmem82        | 0,88 | No  |
| ENSMUSG00000043088 | -3,83E-01 | -0,863816023 | 9,89E-01  | 3,20E-01 | 6,21E-01 | Il17re        | 0,77 | No  |
| ENSMUSG00000043090 | -1,79E-01 | 3,082256928  | 2,74E+00  | 9,80E-02 | 3,91E-01 | Zfp866        | 0,88 | No  |
| ENSMUSG00000043091 | 3,22E-02  | 8,261742175  | 3,11E-01  | 5,77E-01 | 8,35E-01 | Tuba1c        | 1,02 | No  |
| ENSMUSG00000043099 | -2,73E+00 | 1,805657321  | 2,29E+02  | 1,02E-51 | 2,77E-48 | Hic1          | 0,15 | Yes |
| ENSMUSG00000043102 | -6,96E-01 | -2,033666197 | 1,10E+00  | 2,93E-01 | 5,89E-01 | Qrfp          | 0,62 | No  |
| ENSMUSG00000043110 | -1,98E-02 | -3,033655952 | 2,83E-11  | 1,00E+00 | 1,00E+00 | Lrrn4         | 0,99 | No  |
| ENSMUSG00000043126 | 1,86E-02  | -1,31097756  | 1,50E-03  | 9,69E-01 | 1,00E+00 | D830039M14Rik | 1,01 | No  |
| ENSMUSG00000043131 | -4,06E-02 | 8,939508458  | 5,09E-01  | 4,76E-01 | 7,64E-01 | Mob1a         | 0,97 | No  |
| ENSMUSG00000043140 | 4,52E-01  | 3,189586361  | 1,83E+01  | 1,91E-05 | 5,96E-04 | Tmem186       | 1,37 | Yes |
| ENSMUSG00000043145 | 1,36E+00  | -2,497639521 | 1,90E+00  | 1,68E-01 | 5,23E-01 | Gm11292       | 2,57 | No  |
| ENSMUSG00000043153 | 6,33E-02  | 1,144356746  | 9,89E-02  | 7,53E-01 | 9,33E-01 | lspd          | 1,04 | No  |
| ENSMUSG00000043154 | -2,28E-01 | 3,639493475  | 5,56E+00  | 1,83E-02 | 1,43E-01 | Ppp2r3a       | 0,85 | No  |
| ENSMUSG00000043155 | 8,13E-01  | -0,86379372  | 3,31E+00  | 6,87E-02 | 3,30E-01 | Hpd1          | 1,76 | No  |
| ENSMUSG00000043157 | 2,75E-01  | 5,89459642   | 1,72E+01  | 3,38E-05 | 9,70E-04 | Arl11         | 1,21 | Yes |
| ENSMUSG00000043162 | -3,49E-01 | 3,464215974  | 1,24E+01  | 4,31E-04 | 8,10E-03 | Pyurf         | 0,78 | Yes |

|                    |           |              |           |          |          |               |      |     |
|--------------------|-----------|--------------|-----------|----------|----------|---------------|------|-----|
| ENSMUSG00000043168 | -6,49E-01 | -2,522684812 | 4,01E-01  | 5,27E-01 | 8,03E-01 | 4930426D05Rik | 0,64 | No  |
| ENSMUSG00000043183 | 1,92E-01  | 3,573853848  | 3,99E+00  | 4,58E-02 | 2,55E-01 | Simc1         | 1,14 | No  |
| ENSMUSG00000043190 | 9,18E-02  | 2,985304613  | 6,55E-01  | 4,18E-01 | 7,13E-01 | Rfefd         | 1,07 | No  |
| ENSMUSG00000043192 | 9,90E-02  | 8,937723717  | 3,02E+00  | 8,24E-02 | 3,69E-01 | Gm1840        | 1,07 | No  |
| ENSMUSG00000043207 | 8,05E-02  | 6,134538686  | 1,55E+00  | 2,13E-01 | 5,50E-01 | Zmpste24      | 1,06 | No  |
| ENSMUSG00000043219 | -9,86E-01 | -2,655074424 | 8,52E-01  | 3,56E-01 | 6,57E-01 | Hoxa6         | 0,50 | No  |
| ENSMUSG00000043223 | 1,43E-01  | 1,422446279  | 6,36E-01  | 4,25E-01 | 7,20E-01 | Gm4835        | 1,10 | No  |
| ENSMUSG00000043230 | 9,01E-03  | -3,107646452 | -5,16E-10 | 1,00E+00 | 1,00E+00 | Fam124b       | 1,01 | No  |
| ENSMUSG00000043241 | -1,44E-01 | 5,548663788  | 4,47E+00  | 3,45E-02 | 2,19E-01 | Upf2          | 0,90 | No  |
| ENSMUSG00000043243 | -6,07E-01 | 1,639099587  | 1,39E+01  | 1,93E-04 | 4,23E-03 | Fam129c       | 0,66 | Yes |
| ENSMUSG00000043251 | 3,06E-01  | -0,247084243 | 8,96E-01  | 3,44E-01 | 6,44E-01 | Exoc3l        | 1,24 | No  |
| ENSMUSG00000043252 | 1,26E-01  | 5,36924351   | 3,22E+00  | 7,29E-02 | 3,43E-01 | Tmem64        | 1,09 | No  |
| ENSMUSG00000043257 | -1,16E-01 | 3,095470239  | 1,16E+00  | 2,81E-01 | 5,78E-01 | Pigv          | 0,92 | No  |
| ENSMUSG00000043262 | 6,94E-02  | 4,400257822  | 7,25E-01  | 3,94E-01 | 6,95E-01 | Uevld         | 1,05 | No  |
| ENSMUSG00000043263 | -2,07E-01 | 5,549912924  | 9,17E+00  | 2,46E-03 | 3,29E-02 | Ifi209        | 0,87 | Yes |
| ENSMUSG00000043279 | -5,04E-03 | 5,558554178  | 5,44E-03  | 9,41E-01 | 1,00E+00 | Trim56        | 1,00 | No  |
| ENSMUSG00000043282 | 2,57E+00  | -3,0336723   | 2,56E+00  | 1,10E-01 | 4,06E-01 | Teddm1b       | 5,96 | No  |
| ENSMUSG00000043284 | -5,39E-02 | 4,55138775   | 4,56E-01  | 4,99E-01 | 7,85E-01 | Tmem11        | 0,96 | No  |
| ENSMUSG00000043286 | -1,95E+00 | -3,033628749 | 1,50E+00  | 2,21E-01 | 5,50E-01 | Pnpla1        | 0,26 | No  |
| ENSMUSG00000043290 | 1,52E-01  | 0,913495964  | 5,05E-01  | 4,77E-01 | 7,65E-01 | Zfp784        | 1,11 | No  |
| ENSMUSG00000043298 | 1,25E-01  | 0,979985893  | 3,63E-01  | 5,47E-01 | 8,14E-01 | Smco3         | 1,09 | No  |
| ENSMUSG00000043300 | -2,42E-01 | 2,213180026  | 3,10E+00  | 7,83E-02 | 3,58E-01 | B3galnt1      | 0,85 | No  |
| ENSMUSG00000043311 | -9,70E-02 | 3,978796777  | 1,20E+00  | 2,74E-01 | 5,70E-01 | D17H6S53E     | 0,93 | No  |
| ENSMUSG00000043323 | -1,73E-01 | 6,509784349  | 7,60E+00  | 5,84E-03 | 6,28E-02 | Fbrsl1        | 0,89 | No  |
| ENSMUSG00000043329 | 4,31E-01  | 0,677847431  | 3,42E+00  | 6,43E-02 | 3,17E-01 | Gm8849        | 1,35 | No  |
| ENSMUSG00000043333 | -4,01E-02 | -2,711726283 | 1,12E-03  | 9,73E-01 | 1,00E+00 | Rhbdl2        | 0,97 | No  |
| ENSMUSG00000043336 | -3,55E-01 | 6,232561544  | 3,06E+01  | 3,14E-08 | 1,95E-06 | Filip1l       | 0,78 | Yes |
| ENSMUSG00000043340 | -3,72E-01 | 1,777115962  | 5,28E+00  | 2,15E-02 | 1,58E-01 | 6530409C15Rik | 0,77 | No  |
| ENSMUSG00000043346 | -1,29E-02 | 1,697081622  | 6,12E-03  | 9,38E-01 | 1,00E+00 | Gm6741        | 0,99 | No  |
| ENSMUSG00000043372 | -1,39E-01 | 1,538149092  | 6,36E-01  | 4,25E-01 | 7,19E-01 | Hexim2        | 0,91 | No  |
| ENSMUSG00000043385 | -8,91E-01 | -2,896142986 | 4,37E-01  | 5,09E-01 | 7,92E-01 | Olf267        | 0,54 | No  |
| ENSMUSG00000043391 | -1,30E-01 | 5,651875793  | 3,71E+00  | 5,41E-02 | 2,85E-01 | 2510009E07Rik | 0,91 | No  |



|                    |           |              |           |          |          |         |      |     |
|--------------------|-----------|--------------|-----------|----------|----------|---------|------|-----|
| ENSMUSG00000043398 | 1,74E+00  | -1,896197085 | 6,16E+00  | 1,31E-02 | 1,14E-01 | Gpr135  | 3,34 | No  |
| ENSMUSG00000043410 | 8,82E-01  | -1,033570247 | 3,96E+00  | 4,65E-02 | 2,57E-01 | Hfm1    | 1,84 | No  |
| ENSMUSG00000043411 | 7,04E-02  | 6,804410258  | 1,32E+00  | 2,51E-01 | 5,50E-01 | Usp48   | 1,05 | No  |
| ENSMUSG00000043415 | 2,89E-01  | 2,762167418  | 5,72E+00  | 1,68E-02 | 1,35E-01 | Otud1   | 1,22 | No  |
| ENSMUSG00000043418 | 1,87E+00  | -3,107639691 | 1,38E+00  | 2,40E-01 | 5,50E-01 | Lrit2   | 3,67 | No  |
| ENSMUSG00000043419 | 2,59E-01  | 1,010368171  | 1,43E+00  | 2,32E-01 | 5,50E-01 | Chd3os  | 1,20 | No  |
| ENSMUSG00000043421 | -2,10E-01 | 3,599567951  | 4,62E+00  | 3,15E-02 | 2,06E-01 | Hilpda  | 0,86 | No  |
| ENSMUSG00000043424 | 4,54E-02  | 5,596445669  | 4,40E-01  | 5,07E-01 | 7,91E-01 | Eif3j2  | 1,03 | No  |
| ENSMUSG00000043429 | 9,01E-03  | -3,107646452 | -5,16E-10 | 1,00E+00 | 1,00E+00 | Ccdc185 | 1,01 | No  |
| ENSMUSG00000043432 | 9,55E-02  | 3,54514777   | 9,50E-01  | 3,30E-01 | 6,30E-01 | Leng9   | 1,07 | No  |
| ENSMUSG00000043439 | -1,57E-01 | 5,082288316  | 4,56E+00  | 3,28E-02 | 2,12E-01 | Epop    | 0,90 | No  |
| ENSMUSG00000043441 | -7,38E-02 | -3,033659033 | 2,66E-03  | 9,59E-01 | 1,00E+00 | Gpr149  | 0,95 | No  |
| ENSMUSG00000043445 | 2,24E-01  | 5,331827278  | 9,94E+00  | 1,62E-03 | 2,37E-02 | Pgp     | 1,17 | Yes |
| ENSMUSG00000043448 | 2,74E-02  | -3,033621357 | 9,16E-12  | 1,00E+00 | 1,00E+00 | Gjc2    | 1,02 | No  |
| ENSMUSG00000043456 | -4,87E-02 | -2,896122191 | 1,09E-03  | 9,74E-01 | 1,00E+00 | Zfp536  | 0,97 | No  |
| ENSMUSG00000043460 | 3,98E-01  | -2,311203016 | 2,54E-01  | 6,14E-01 | 8,53E-01 | Elfn2   | 1,32 | No  |
| ENSMUSG00000043461 | 3,14E-02  | -3,107617333 | -7,69E-10 | 1,00E+00 | 1,00E+00 | Sptssb  | 1,02 | No  |
| ENSMUSG00000043467 | 1,38E-02  | 4,757176204  | 3,29E-02  | 8,56E-01 | 9,93E-01 | Zbtb37  | 1,01 | No  |
| ENSMUSG00000043468 | -6,97E-01 | -1,963243885 | 1,11E+00  | 2,92E-01 | 5,88E-01 | Adam30  | 0,62 | No  |
| ENSMUSG00000043483 | -1,33E-01 | 8,151498809  | 5,29E+00  | 2,15E-02 | 1,58E-01 | Gm6863  | 0,91 | No  |
| ENSMUSG00000043484 | 1,03E-01  | 5,137706988  | 2,00E+00  | 1,57E-01 | 5,03E-01 | Gm5867  | 1,07 | No  |
| ENSMUSG00000043487 | 2,01E-01  | 2,591086436  | 2,72E+00  | 9,92E-02 | 3,92E-01 | Acot6   | 1,15 | No  |
| ENSMUSG00000043488 | 4,06E-02  | 1,684575947  | 6,28E-02  | 8,02E-01 | 9,61E-01 | Frmd8os | 1,03 | No  |
| ENSMUSG00000043496 | 5,95E-01  | -3,070171822 | 1,40E-01  | 7,08E-01 | 9,09E-01 | Tril    | 1,51 | No  |
| ENSMUSG00000043501 | -1,87E+00 | -3,107637761 | 1,39E+00  | 2,38E-01 | 5,50E-01 | Lgals2  | 0,27 | No  |
| ENSMUSG00000043505 | -2,66E-01 | 2,415217135  | 4,18E+00  | 4,10E-02 | 2,40E-01 | Gimap5  | 0,83 | No  |
| ENSMUSG00000043510 | -9,60E-03 | 2,628119054  | 6,08E-03  | 9,38E-01 | 1,00E+00 | Hscb    | 0,99 | No  |
| ENSMUSG00000043529 | 3,15E+00  | -2,963263135 | 4,04E+00  | 4,45E-02 | 2,51E-01 | Olfr266 | 8,85 | No  |
| ENSMUSG00000043531 | -3,49E-02 | -2,497607097 | 1,38E-03  | 9,70E-01 | 1,00E+00 | Sorcs1  | 0,98 | No  |
| ENSMUSG00000043535 | -1,81E-02 | 6,945712099  | 8,85E-02  | 7,66E-01 | 9,40E-01 | Setx    | 0,99 | No  |
| ENSMUSG00000043541 | 9,35E-02  | 1,488315355  | 2,80E-01  | 5,97E-01 | 8,45E-01 | Casc1   | 1,07 | No  |
| ENSMUSG00000043542 | -1,78E-01 | 3,236172378  | 2,84E+00  | 9,19E-02 | 3,82E-01 | Zc2hc1a | 0,88 | No  |

|                    |           |              |           |          |          |               |      |     |
|--------------------|-----------|--------------|-----------|----------|----------|---------------|------|-----|
| ENSMUSG00000043556 | 9,01E-03  | -3,107646452 | -5,16E-10 | 1,00E+00 | 1,00E+00 | Fbxl7         | 1,01 | No  |
| ENSMUSG00000043557 | 4,25E-01  | 2,586248187  | 1,08E+01  | 1,01E-03 | 1,62E-02 | Mdga1         | 1,34 | Yes |
| ENSMUSG00000043572 | -1,09E-01 | 2,16436348   | 5,90E-01  | 4,42E-01 | 7,34E-01 | Pars2         | 0,93 | No  |
| ENSMUSG00000043587 | 2,03E-01  | 3,432686529  | 3,94E+00  | 4,72E-02 | 2,60E-01 | Pxylp1        | 1,15 | No  |
| ENSMUSG00000043592 | -1,89E+00 | -3,1076441   | 1,42E+00  | 2,33E-01 | 5,50E-01 | Unc5cl        | 0,27 | No  |
| ENSMUSG00000043602 | 4,72E-01  | 1,447996355  | 7,50E+00  | 6,18E-03 | 6,56E-02 | Zfp3          | 1,39 | No  |
| ENSMUSG00000043613 | -1,39E+00 | -2,896103981 | 1,22E+00  | 2,70E-01 | 5,66E-01 | Mmp3          | 0,38 | No  |
| ENSMUSG00000043614 | -7,38E-01 | -1,600636553 | 1,43E+00  | 2,32E-01 | 5,50E-01 | Vps37d        | 0,60 | No  |
| ENSMUSG00000043618 | 1,72E-02  | 6,443487654  | 7,45E-02  | 7,85E-01 | 9,51E-01 | Eif5al3-ps    | 1,01 | No  |
| ENSMUSG00000043623 | -1,76E-01 | 0,198839056  | 3,98E-01  | 5,28E-01 | 8,04E-01 | 4933412A08Rik | 0,89 | No  |
| ENSMUSG00000043629 | 2,08E+00  | -2,355650596 | 5,53E+00  | 1,87E-02 | 1,45E-01 | 1700019D03Rik | 4,24 | No  |
| ENSMUSG00000043631 | 8,33E-02  | -1,289574716 | 2,91E-02  | 8,65E-01 | 9,98E-01 | Ecm2          | 1,06 | No  |
| ENSMUSG00000043633 | -8,89E-02 | 7,344711779  | 2,22E+00  | 1,36E-01 | 4,65E-01 | Fam221b       | 0,94 | No  |
| ENSMUSG00000043635 | 7,02E-01  | -2,311199986 | 7,16E-01  | 3,98E-01 | 6,98E-01 | Adamts3       | 1,63 | No  |
| ENSMUSG00000043639 | 6,14E-01  | -0,719335109 | 2,55E+00  | 1,10E-01 | 4,07E-01 | Rbm20         | 1,53 | No  |
| ENSMUSG00000043644 | -5,20E-01 | -0,262778913 | 2,63E+00  | 1,05E-01 | 3,97E-01 | 0610009L18Rik | 0,70 | No  |
| ENSMUSG00000043648 | 3,11E+00  | -2,963280805 | 3,94E+00  | 4,72E-02 | 2,60E-01 | Pld6          | 8,63 | No  |
| ENSMUSG00000043659 | -1,92E+00 | -3,033623267 | 1,46E+00  | 2,27E-01 | 5,50E-01 | Npsr1         | 0,26 | No  |
| ENSMUSG00000043664 | 3,49E-01  | 1,402512839  | 3,80E+00  | 5,13E-02 | 2,75E-01 | Tmem221       | 1,27 | No  |
| ENSMUSG00000043668 | -8,68E-01 | 0,804658751  | 1,64E+01  | 5,09E-05 | 1,38E-03 | Tox3          | 0,55 | Yes |
| ENSMUSG00000043670 | 1,81E+00  | -3,10765737  | 1,28E+00  | 2,58E-01 | 5,50E-01 | Diras1        | 3,49 | No  |
| ENSMUSG00000043671 | -2,01E-01 | 3,024758491  | 3,39E+00  | 6,55E-02 | 3,21E-01 | Dpy19l3       | 0,87 | No  |
| ENSMUSG00000043681 | 1,81E+00  | -3,10765737  | 1,28E+00  | 2,58E-01 | 5,50E-01 | Fam25c        | 3,49 | No  |
| ENSMUSG00000043683 | 8,04E-02  | 6,044499725  | 1,53E+00  | 2,17E-01 | 5,50E-01 | Fem1a         | 1,06 | No  |
| ENSMUSG00000043687 | -5,96E-01 | -1,2262243   | 1,53E+00  | 2,15E-01 | 5,50E-01 | 1190005I06Rik | 0,66 | No  |
| ENSMUSG00000043702 | -9,10E-02 | 5,214855385  | 1,60E+00  | 2,05E-01 | 5,50E-01 | Pde12         | 0,94 | No  |
| ENSMUSG00000043705 | -1,31E-01 | -1,088850072 | 9,79E-02  | 7,54E-01 | 9,34E-01 | Capn13        | 0,91 | No  |
| ENSMUSG00000043716 | -2,51E-01 | 6,897270827  | 1,69E+01  | 3,84E-05 | 1,08E-03 | Rpl7          | 0,84 | Yes |
| ENSMUSG00000043727 | -1,32E-01 | -1,126721625 | 8,71E-02  | 7,68E-01 | 9,41E-01 | F830045P16Rik | 0,91 | No  |
| ENSMUSG00000043733 | 3,64E-02  | 7,543253654  | 3,79E-01  | 5,38E-01 | 8,09E-01 | Ptpn11        | 1,03 | No  |
| ENSMUSG00000043740 | -3,35E-01 | 6,038800383  | 2,65E+01  | 2,66E-07 | 1,35E-05 | B430306N03Rik | 0,79 | Yes |
| ENSMUSG00000043747 | -2,47E+00 | -2,497560991 | 5,29E+00  | 2,14E-02 | 1,58E-01 | 1520401A03Rik | 0,18 | No  |

|                    |           |              |           |          |          |               |      |     |
|--------------------|-----------|--------------|-----------|----------|----------|---------------|------|-----|
| ENSMUSG00000043753 | 1,87E+00  | -3,107639691 | 1,38E+00  | 2,40E-01 | 5,50E-01 | Dmrta1        | 3,67 | No  |
| ENSMUSG00000043760 | -1,94E+00 | -3,107619243 | 1,50E+00  | 2,21E-01 | 5,50E-01 | Pkhd1         | 0,26 | No  |
| ENSMUSG00000043770 | -6,91E-02 | 7,251886527  | 1,33E+00  | 2,49E-01 | 5,50E-01 | Gm12481       | 0,95 | No  |
| ENSMUSG00000043773 | -2,65E-01 | -0,863652439 | 4,38E-01  | 5,08E-01 | 7,92E-01 | 1700048020Rik | 0,83 | No  |
| ENSMUSG00000043782 | -8,43E-01 | -0,912479762 | 4,09E+00  | 4,30E-02 | 2,47E-01 | Bicd12        | 0,56 | No  |
| ENSMUSG00000043789 | 1,41E+00  | -2,268160015 | 2,83E+00  | 9,26E-02 | 3,83E-01 | Vwce          | 2,65 | No  |
| ENSMUSG00000043794 | -2,01E-01 | -1,436665875 | 1,68E-01  | 6,81E-01 | 8,94E-01 | D830025C05Rik | 0,87 | No  |
| ENSMUSG00000043795 | -5,87E-02 | 3,89720995   | 4,44E-01  | 5,05E-01 | 7,90E-01 | Prr33         | 0,96 | No  |
| ENSMUSG00000043800 | 2,78E-01  | 1,477163243  | 2,33E+00  | 1,27E-01 | 4,46E-01 | Kifc5c-ps     | 1,21 | No  |
| ENSMUSG00000043801 | -2,97E-02 | 8,381512502  | 2,67E-01  | 6,06E-01 | 8,49E-01 | Oaz1-ps       | 0,98 | No  |
| ENSMUSG00000043807 | -3,52E-02 | -0,378374656 | 9,96E-03  | 9,21E-01 | 1,00E+00 | Ly6g5b        | 0,98 | No  |
| ENSMUSG00000043811 | 1,60E-01  | 2,107898506  | 1,29E+00  | 2,56E-01 | 5,50E-01 | Rtn4r         | 1,12 | No  |
| ENSMUSG00000043822 | 3,06E-01  | 5,693545589  | 2,05E+01  | 6,06E-06 | 2,14E-04 | Adamts15      | 1,24 | Yes |
| ENSMUSG00000043831 | 2,04E-02  | 4,007393159  | 5,25E-02  | 8,19E-01 | 9,71E-01 | Lysmd4        | 1,01 | No  |
| ENSMUSG00000043832 | 3,80E-01  | 5,307131062  | 2,82E+01  | 1,09E-07 | 6,03E-06 | Clec4a3       | 1,30 | Yes |
| ENSMUSG00000043833 | 6,27E-02  | 0,483849173  | 6,80E-02  | 7,94E-01 | 9,56E-01 | 2900005J15Rik | 1,04 | No  |
| ENSMUSG00000043843 | 1,87E+00  | -3,107639691 | 1,38E+00  | 2,40E-01 | 5,50E-01 | Tmem145       | 3,67 | No  |
| ENSMUSG00000043850 | 1,85E+00  | -3,107657832 | 1,35E+00  | 2,46E-01 | 5,50E-01 | Clrn1         | 3,61 | No  |
| ENSMUSG00000043857 | -3,83E-02 | -3,107651936 | -7,91E-11 | 1,00E+00 | 1,00E+00 | Mgat5b        | 0,97 | No  |
| ENSMUSG00000043866 | -3,93E-02 | 6,191475345  | 3,75E-01  | 5,40E-01 | 8,10E-01 | Taf10         | 0,97 | No  |
| ENSMUSG00000043870 | 2,44E-01  | 3,250359116  | 5,32E+00  | 2,11E-02 | 1,57E-01 | Gm5809        | 1,18 | No  |
| ENSMUSG00000043872 | 2,97E-02  | 2,804642648  | 6,40E-02  | 8,00E-01 | 9,61E-01 | Zmym1         | 1,02 | No  |
| ENSMUSG00000043873 | 3,28E-01  | -1,980550698 | 2,42E-01  | 6,23E-01 | 8,58E-01 | Chil5         | 1,26 | No  |
| ENSMUSG00000043881 | 3,24E-02  | 3,874713149  | 1,22E-01  | 7,27E-01 | 9,19E-01 | Kbtbd7        | 1,02 | No  |
| ENSMUSG00000043885 | 1,44E-01  | 7,201805912  | 5,69E+00  | 1,71E-02 | 1,36E-01 | Slc36a4       | 1,10 | No  |
| ENSMUSG00000043889 | -5,68E-02 | 9,20125409   | 1,00E+00  | 3,16E-01 | 6,17E-01 | Gm8399        | 0,96 | No  |
| ENSMUSG00000043895 | 5,57E-01  | 5,197763372  | 6,08E+01  | 6,24E-15 | 9,63E-13 | S1pr2         | 1,47 | Yes |
| ENSMUSG00000043903 | 6,26E-01  | -1,574278862 | 1,15E+00  | 2,83E-01 | 5,80E-01 | Zfp469        | 1,54 | No  |
| ENSMUSG00000043909 | -7,81E-02 | 5,482083405  | 1,28E+00  | 2,58E-01 | 5,50E-01 | Trp53bp1      | 0,95 | No  |
| ENSMUSG00000043923 | -1,64E-01 | 3,599187963  | 2,93E+00  | 8,70E-02 | 3,78E-01 | Ccdc84        | 0,89 | No  |
| ENSMUSG00000043924 | -7,33E-01 | -1,863607959 | 1,40E+00  | 2,36E-01 | 5,50E-01 | Ncmap         | 0,60 | No  |
| ENSMUSG00000043925 | -7,66E-01 | -1,895977815 | 1,20E+00  | 2,74E-01 | 5,71E-01 | Olfir544      | 0,59 | No  |

|                    |           |              |          |          |          |               |      |     |
|--------------------|-----------|--------------|----------|----------|----------|---------------|------|-----|
| ENSMUSG00000043931 | -1,86E+00 | -3,033612668 | 1,39E+00 | 2,38E-01 | 5,50E-01 | Gimap7        | 0,28 | No  |
| ENSMUSG00000043932 | -9,94E-02 | -0,195567896 | 1,02E-01 | 7,50E-01 | 9,31E-01 | Klri2         | 0,93 | No  |
| ENSMUSG00000043939 | -1,78E-01 | 3,81603519   | 3,73E+00 | 5,35E-02 | 2,82E-01 | A530064D06Rik | 0,88 | No  |
| ENSMUSG00000043940 | 1,31E-01  | 7,147555274  | 4,67E+00 | 3,07E-02 | 2,02E-01 | Wdfy3         | 1,09 | No  |
| ENSMUSG00000043943 | -3,43E-01 | -1,268079923 | 4,79E-01 | 4,89E-01 | 7,76E-01 | Naalad2       | 0,79 | No  |
| ENSMUSG00000043953 | 1,30E-03  | 4,271015834  | 2,51E-04 | 9,87E-01 | 1,00E+00 | Ccrl2         | 1,00 | No  |
| ENSMUSG00000043962 | -3,29E-02 | 7,586509866  | 3,10E-01 | 5,78E-01 | 8,35E-01 | Thrap3        | 0,98 | No  |
| ENSMUSG00000043964 | 9,27E-02  | 5,646321831  | 1,88E+00 | 1,71E-01 | 5,26E-01 | Orai3         | 1,07 | No  |
| ENSMUSG00000043969 | 1,87E+00  | -3,107639691 | 1,38E+00 | 2,40E-01 | 5,50E-01 | Emx2          | 3,67 | No  |
| ENSMUSG00000043986 | -3,29E-01 | -2,800957559 | 7,91E-02 | 7,79E-01 | 9,47E-01 | Spata31d1d    | 0,80 | No  |
| ENSMUSG00000043987 | 5,10E-02  | 4,755623469  | 4,42E-01 | 5,06E-01 | 7,91E-01 | Cep164        | 1,04 | No  |
| ENSMUSG00000043991 | 1,83E-01  | 4,53893966   | 5,24E+00 | 2,20E-02 | 1,61E-01 | Pura          | 1,13 | No  |
| ENSMUSG00000043993 | -3,30E-02 | 0,873319913  | 2,22E-02 | 8,81E-01 | 1,00E+00 | 2900052L18Rik | 0,98 | No  |
| ENSMUSG00000043998 | 1,06E-01  | 6,768833364  | 2,97E+00 | 8,48E-02 | 3,74E-01 | Mgat2         | 1,08 | No  |
| ENSMUSG00000043999 | -3,51E-01 | -2,355581388 | 1,56E-01 | 6,93E-01 | 9,01E-01 | Gpr75         | 0,78 | No  |
| ENSMUSG00000044005 | -9,11E-01 | 0,763718725  | 1,79E+01 | 2,36E-05 | 7,18E-04 | Gls2          | 0,53 | Yes |
| ENSMUSG00000044006 | 1,77E-01  | -2,355561141 | 4,70E-02 | 8,28E-01 | 9,76E-01 | Cilp2         | 1,13 | No  |
| ENSMUSG00000044014 | -2,68E+00 | -3,033645766 | 2,84E+00 | 9,17E-02 | 3,82E-01 | Npy5r         | 0,16 | No  |
| ENSMUSG00000044017 | 7,43E-01  | -2,963261206 | 3,01E-01 | 5,83E-01 | 8,38E-01 | Adgrd1        | 1,67 | No  |
| ENSMUSG00000044018 | 8,69E-02  | 4,551254235  | 1,18E+00 | 2,77E-01 | 5,74E-01 | Mrpl50        | 1,06 | No  |
| ENSMUSG00000044021 | 1,06E+00  | -2,448773659 | 1,44E+00 | 2,31E-01 | 5,50E-01 | Muc19         | 2,08 | No  |
| ENSMUSG00000044022 | 1,87E+00  | -3,107639691 | 1,38E+00 | 2,40E-01 | 5,50E-01 | Pcdhb21       | 3,67 | No  |
| ENSMUSG00000044024 | -7,04E-02 | 2,041893025  | 2,31E-01 | 6,30E-01 | 8,63E-01 | Rell2         | 0,95 | No  |
| ENSMUSG00000044026 | 1,60E-01  | 4,112259064  | 3,42E+00 | 6,44E-02 | 3,18E-01 | Slc35g1       | 1,12 | No  |
| ENSMUSG00000044029 | -8,80E-02 | -2,896116238 | 3,33E-03 | 9,54E-01 | 1,00E+00 | Olfr178       | 0,94 | No  |
| ENSMUSG00000044030 | 1,48E-01  | 4,226753717  | 3,14E+00 | 7,64E-02 | 3,52E-01 | Irf2bp1       | 1,11 | No  |
| ENSMUSG00000044033 | -1,31E-01 | -0,997958763 | 7,79E-02 | 7,80E-01 | 9,48E-01 | Ccdc141       | 0,91 | No  |
| ENSMUSG00000044034 | 2,46E-01  | -1,378369881 | 2,04E-01 | 6,52E-01 | 8,77E-01 | Npb           | 1,19 | No  |
| ENSMUSG00000044037 | 1,67E-02  | 5,438477159  | 5,74E-02 | 8,11E-01 | 9,66E-01 | Als2cl        | 1,01 | No  |
| ENSMUSG00000044042 | -3,09E-02 | 4,816950312  | 1,64E-01 | 6,86E-01 | 8,97E-01 | Fmn1          | 0,98 | No  |
| ENSMUSG00000044043 | -1,87E+00 | -3,107637761 | 1,39E+00 | 2,38E-01 | 5,50E-01 | Pcdhb14       | 0,27 | No  |
| ENSMUSG00000044052 | 3,06E-01  | -0,627581621 | 5,96E-01 | 4,40E-01 | 7,32E-01 | Ccr10         | 1,24 | No  |

|                    |           |              |           |          |          |               |      |     |
|--------------------|-----------|--------------|-----------|----------|----------|---------------|------|-----|
| ENSMUSG00000044055 | -2,03E-01 | -1,069978359 | 2,12E-01  | 6,45E-01 | 8,73E-01 | Otos          | 0,87 | No  |
| ENSMUSG00000044056 | 2,16E-01  | -1,740771754 | 1,19E-01  | 7,30E-01 | 9,21E-01 | Efcab9        | 1,16 | No  |
| ENSMUSG00000044058 | 4,49E-01  | 0,344880935  | 3,07E+00  | 7,95E-02 | 3,61E-01 | Mthfr-ps1     | 1,37 | No  |
| ENSMUSG00000044065 | -8,25E-02 | -2,54815579  | 7,85E-03  | 9,29E-01 | 1,00E+00 | Gm9788        | 0,94 | No  |
| ENSMUSG00000044066 | -3,28E-02 | 4,444693729  | 1,66E-01  | 6,84E-01 | 8,96E-01 | Cep68         | 0,98 | No  |
| ENSMUSG00000044067 | -7,04E-01 | -2,54819638  | 5,55E-01  | 4,56E-01 | 7,46E-01 | Gpr22         | 0,61 | No  |
| ENSMUSG00000044068 | -3,12E-02 | 3,345201369  | 9,39E-02  | 7,59E-01 | 9,36E-01 | Zrsr1         | 0,98 | No  |
| ENSMUSG00000044072 | 3,22E-01  | 4,451625282  | 1,57E+01  | 7,50E-05 | 1,90E-03 | Eml6          | 1,25 | Yes |
| ENSMUSG00000044080 | -6,46E-02 | 6,724458121  | 1,09E+00  | 2,97E-01 | 5,92E-01 | S100a1        | 0,96 | No  |
| ENSMUSG00000044081 | 2,25E-01  | -0,73357547  | 3,52E-01  | 5,53E-01 | 8,19E-01 | Zfp85os       | 1,17 | No  |
| ENSMUSG00000044083 | 1,58E-01  | -1,548092148 | 8,13E-02  | 7,76E-01 | 9,45E-01 | Efcab8        | 1,12 | No  |
| ENSMUSG00000044084 | 3,14E-02  | -3,107617333 | -7,69E-10 | 1,00E+00 | 1,00E+00 | 4933402P03Rik | 1,02 | No  |
| ENSMUSG00000044086 | 1,24E+00  | -0,912733021 | 8,24E+00  | 4,10E-03 | 4,82E-02 | Lmod3         | 2,36 | Yes |
| ENSMUSG00000044092 | 1,98E-02  | 4,832987983  | 6,73E-02  | 7,95E-01 | 9,57E-01 | C130050O18Rik | 1,01 | No  |
| ENSMUSG00000044098 | 3,49E-02  | 4,550889085  | 1,98E-01  | 6,57E-01 | 8,80E-01 | Rsb1          | 1,02 | No  |
| ENSMUSG00000044103 | 1,80E-01  | 3,157984363  | 2,53E+00  | 1,12E-01 | 4,11E-01 | Il1f9         | 1,13 | No  |
| ENSMUSG00000044117 | -1,89E+00 | -3,1076441   | 1,42E+00  | 2,33E-01 | 5,50E-01 | 2900011O08Rik | 0,27 | No  |
| ENSMUSG00000044122 | -4,36E-01 | -0,299894374 | 1,60E+00  | 2,06E-01 | 5,50E-01 | Proca1        | 0,74 | No  |
| ENSMUSG00000044125 | 1,18E-01  | -1,412991607 | 5,24E-02  | 8,19E-01 | 9,71E-01 | 9530080O11Rik | 1,09 | No  |
| ENSMUSG00000044134 | 7,85E-02  | 3,251542906  | 5,67E-01  | 4,51E-01 | 7,41E-01 | Fam109a       | 1,06 | No  |
| ENSMUSG00000044139 | 2,45E-01  | 0,767456732  | 1,20E+00  | 2,74E-01 | 5,70E-01 | Prss53        | 1,18 | No  |
| ENSMUSG00000044141 | 9,90E-02  | 3,460239211  | 9,92E-01  | 3,19E-01 | 6,20E-01 | E130201H02Rik | 1,07 | No  |
| ENSMUSG00000044145 | -1,04E-02 | -0,088870509 | 1,10E-03  | 9,74E-01 | 1,00E+00 | 1810024B03Rik | 0,99 | No  |
| ENSMUSG00000044147 | 1,34E-01  | 7,657502662  | 5,14E+00  | 2,34E-02 | 1,68E-01 | Arf6          | 1,10 | No  |
| ENSMUSG00000044155 | 2,37E-02  | 4,38926483   | 8,40E-02  | 7,72E-01 | 9,43E-01 | Lsm8          | 1,02 | No  |
| ENSMUSG00000044156 | -1,09E-01 | 6,012545415  | 2,83E+00  | 9,27E-02 | 3,83E-01 | Hepacam2      | 0,93 | No  |
| ENSMUSG00000044162 | -2,21E-01 | 6,325003386  | 1,22E+01  | 4,84E-04 | 8,93E-03 | Tnip3         | 0,86 | Yes |
| ENSMUSG00000044164 | 1,81E+00  | -3,10765737  | 1,28E+00  | 2,58E-01 | 5,50E-01 | Rnf182        | 3,49 | No  |
| ENSMUSG00000044165 | 1,07E+00  | -2,424884699 | 1,29E+00  | 2,56E-01 | 5,50E-01 | Bcl2l15       | 2,11 | No  |
| ENSMUSG00000044167 | 5,56E-03  | 4,393964402  | 4,72E-03  | 9,45E-01 | 1,00E+00 | Foxo1         | 1,00 | No  |
| ENSMUSG00000044176 | 1,89E+00  | -3,033614598 | 1,38E+00  | 2,40E-01 | 5,50E-01 | Spink10       | 3,70 | No  |
| ENSMUSG00000044177 | -7,08E-01 | -2,18558236  | 8,53E-01  | 3,56E-01 | 6,57E-01 | Wfikkn2       | 0,61 | No  |

|                    |           |              |           |          |          |               |      |     |
|--------------------|-----------|--------------|-----------|----------|----------|---------------|------|-----|
| ENSMUSG00000044186 | -1,87E+00 | -3,107637761 | 1,39E+00  | 2,38E-01 | 5,50E-01 | Nkx2-6        | 0,27 | No  |
| ENSMUSG00000044197 | 1,28E-01  | 6,433655222  | 4,11E+00  | 4,25E-02 | 2,45E-01 | Gpr146        | 1,09 | No  |
| ENSMUSG00000044199 | 1,54E-01  | 3,560249132  | 2,50E+00  | 1,14E-01 | 4,17E-01 | S1pr4         | 1,11 | No  |
| ENSMUSG00000044201 | -2,55E-02 | 2,704213251  | 4,42E-02  | 8,33E-01 | 9,79E-01 | Cdc25c        | 0,98 | No  |
| ENSMUSG00000044211 | -3,08E-02 | 4,730386461  | 1,58E-01  | 6,91E-01 | 9,00E-01 | Gm7887        | 0,98 | No  |
| ENSMUSG00000044216 | 1,24E+00  | -2,770605879 | 9,57E-01  | 3,28E-01 | 6,29E-01 | Kcnj4         | 2,37 | No  |
| ENSMUSG00000044217 | -6,07E-02 | -2,77056901  | 2,49E-03  | 9,60E-01 | 1,00E+00 | Aqp5          | 0,96 | No  |
| ENSMUSG00000044220 | 1,83E+00  | -2,963282593 | 1,33E+00  | 2,50E-01 | 5,50E-01 | Nkx2-3        | 3,56 | No  |
| ENSMUSG00000044221 | 4,26E-02  | 5,852043911  | 4,14E-01  | 5,20E-01 | 7,99E-01 | Grsf1         | 1,03 | No  |
| ENSMUSG00000044224 | -2,58E-02 | 4,401262408  | 9,86E-02  | 7,54E-01 | 9,33E-01 | Dnajc21       | 0,98 | No  |
| ENSMUSG00000044229 | -5,48E-01 | 0,152302457  | 4,13E+00  | 4,22E-02 | 2,45E-01 | Nxpe4         | 0,68 | No  |
| ENSMUSG00000044231 | 2,31E-01  | 1,635880844  | 1,82E+00  | 1,77E-01 | 5,37E-01 | Nhlrc1        | 1,17 | No  |
| ENSMUSG00000044243 | -2,69E+00 | -2,832001224 | 2,88E+00  | 8,99E-02 | 3,80E-01 | Bhlha9        | 0,15 | No  |
| ENSMUSG00000044244 | 9,21E-02  | 3,432205519  | 8,15E-01  | 3,67E-01 | 6,68E-01 | Il20rb        | 1,07 | No  |
| ENSMUSG00000044250 | 2,31E-01  | 4,033566372  | 6,87E+00  | 8,76E-03 | 8,47E-02 | Pced1b        | 1,17 | No  |
| ENSMUSG00000044252 | 2,76E-01  | 4,407988793  | 1,14E+01  | 7,42E-04 | 1,27E-02 | Osbp1a        | 1,21 | Yes |
| ENSMUSG00000044254 | 3,32E-01  | -1,289571756 | 4,71E-01  | 4,93E-01 | 7,78E-01 | Pcsk9         | 1,26 | No  |
| ENSMUSG00000044258 | -2,81E+00 | -2,318130211 | 7,56E+00  | 5,98E-03 | 6,40E-02 | Ctla2a        | 0,14 | No  |
| ENSMUSG00000044268 | 5,37E-02  | 4,379743945  | 4,28E-01  | 5,13E-01 | 7,95E-01 | Gm4895        | 1,04 | No  |
| ENSMUSG00000044276 | 1,85E-01  | -2,832010644 | 2,48E-02  | 8,75E-01 | 1,00E+00 | 4933427E11Rik | 1,14 | No  |
| ENSMUSG00000044279 | -7,62E-01 | -2,226241736 | 9,18E-01  | 3,38E-01 | 6,38E-01 | Crb3          | 0,59 | No  |
| ENSMUSG00000044285 | -7,49E-02 | 9,02099344   | 1,73E+00  | 1,88E-01 | 5,50E-01 | Gm1821        | 0,95 | No  |
| ENSMUSG00000044286 | 3,14E-02  | -3,107617333 | -7,69E-10 | 1,00E+00 | 1,00E+00 | Olfir221      | 1,02 | No  |
| ENSMUSG00000044287 | -5,71E-01 | -2,015677644 | 5,79E-01  | 4,47E-01 | 7,37E-01 | Nrn1l         | 0,67 | No  |
| ENSMUSG00000044288 | -3,21E+00 | -2,896063972 | 4,33E+00  | 3,75E-02 | 2,30E-01 | Cnr1          | 0,11 | No  |
| ENSMUSG00000044296 | -1,87E+00 | -3,033619006 | 1,41E+00  | 2,36E-01 | 5,50E-01 | Zfp879        | 0,27 | No  |
| ENSMUSG00000044303 | -4,53E-02 | -0,098156859 | 2,30E-02  | 8,79E-01 | 1,00E+00 | Cdkn2a        | 0,97 | No  |
| ENSMUSG00000044306 | 1,31E-01  | 1,714675773  | 6,48E-01  | 4,21E-01 | 7,16E-01 | 4930500M09Rik | 1,09 | No  |
| ENSMUSG00000044308 | 2,01E-02  | 6,391568876  | 1,00E-01  | 7,52E-01 | 9,32E-01 | Ubr3          | 1,01 | No  |
| ENSMUSG00000044309 | -1,58E+00 | 3,801652936  | 2,93E+02  | 1,01E-65 | 1,00E-61 | Apol7c        | 0,33 | Yes |
| ENSMUSG00000044313 | -2,76E-01 | 3,264752355  | 7,30E+00  | 6,91E-03 | 7,10E-02 | Mab21l3       | 0,83 | No  |
| ENSMUSG00000044317 | 4,27E-01  | 0,508499552  | 2,62E+00  | 1,05E-01 | 3,98E-01 | Gpr4          | 1,34 | No  |

|                    |           |              |          |          |          |               |      |     |
|--------------------|-----------|--------------|----------|----------|----------|---------------|------|-----|
| ENSMUSG00000044320 | -2,15E-01 | -0,2575923   | 4,38E-01 | 5,08E-01 | 7,92E-01 | 1700001022Rik | 0,86 | No  |
| ENSMUSG00000044322 | -2,71E+00 | -3,033620915 | 2,92E+00 | 8,75E-02 | 3,78E-01 | Dsc1          | 0,15 | No  |
| ENSMUSG00000044328 | 1,55E-01  | 3,637795117  | 2,57E+00 | 1,09E-01 | 4,05E-01 | Trp53i13      | 1,11 | No  |
| ENSMUSG00000044330 | 8,61E-03  | 5,052880649  | 1,38E-02 | 9,07E-01 | 1,00E+00 | Gm9790        | 1,01 | No  |
| ENSMUSG00000044337 | -2,02E+00 | -2,65512808  | 3,10E+00 | 7,85E-02 | 3,58E-01 | Ackr3         | 0,25 | No  |
| ENSMUSG00000044338 | -9,59E-01 | -2,600656517 | 8,07E-01 | 3,69E-01 | 6,70E-01 | Aplnr         | 0,51 | No  |
| ENSMUSG00000044339 | 2,43E-01  | 2,023624443  | 2,66E+00 | 1,03E-01 | 3,95E-01 | Alkbh2        | 1,18 | No  |
| ENSMUSG00000044340 | -2,14E-01 | 5,352105766  | 9,26E+00 | 2,35E-03 | 3,19E-02 | Phlpp1        | 0,86 | Yes |
| ENSMUSG00000044345 | -1,23E-01 | 5,62772842   | 3,32E+00 | 6,84E-02 | 3,29E-01 | Marveld1      | 0,92 | No  |
| ENSMUSG00000044349 | -9,92E-02 | 2,738491555  | 6,58E-01 | 4,17E-01 | 7,12E-01 | Snhg11        | 0,93 | No  |
| ENSMUSG00000044350 | -2,09E-02 | 6,297911835  | 1,08E-01 | 7,42E-01 | 9,27E-01 | Lacc1         | 0,99 | No  |
| ENSMUSG00000044352 | 1,41E+00  | -2,863749101 | 1,30E+00 | 2,54E-01 | 5,50E-01 | Sowaha        | 2,66 | No  |
| ENSMUSG00000044362 | -2,48E-01 | -1,126718867 | 3,53E-01 | 5,53E-01 | 8,19E-01 | Ccdc89        | 0,84 | No  |
| ENSMUSG00000044364 | 6,74E-01  | -2,226289429 | 6,58E-01 | 4,17E-01 | 7,12E-01 | Tmem74b       | 1,60 | No  |
| ENSMUSG00000044367 | 1,19E-01  | 3,618852458  | 1,51E+00 | 2,20E-01 | 5,50E-01 | Slc16a13      | 1,09 | No  |
| ENSMUSG00000044377 | -4,07E-02 | 2,036438041  | 7,45E-02 | 7,85E-01 | 9,51E-01 | Gm13080       | 0,97 | No  |
| ENSMUSG00000044387 | -1,18E+00 | -2,268009104 | 1,81E+00 | 1,78E-01 | 5,39E-01 | 2410080I02Rik | 0,44 | No  |
| ENSMUSG00000044390 | -1,80E-05 | 0,406091652  | 5,66E-09 | 1,00E+00 | 1,00E+00 | Tigd3         | 1,00 | No  |
| ENSMUSG00000044393 | -3,43E+00 | -1,980352302 | 1,84E+01 | 1,82E-05 | 5,69E-04 | Dsg2          | 0,09 | Yes |
| ENSMUSG00000044405 | 1,92E+00  | -2,655135671 | 2,73E+00 | 9,83E-02 | 3,91E-01 | Adig          | 3,77 | No  |
| ENSMUSG00000044408 | 3,22E-02  | 6,590168402  | 2,67E-01 | 6,06E-01 | 8,49E-01 | Sptssa        | 1,02 | No  |
| ENSMUSG00000044424 | -2,08E-01 | 7,445899221  | 1,23E+01 | 4,47E-04 | 8,38E-03 | Gm9493        | 0,87 | Yes |
| ENSMUSG00000044429 | 8,53E-01  | -2,600639625 | 6,34E-01 | 4,26E-01 | 7,20E-01 | Cryga         | 1,81 | No  |
| ENSMUSG00000044433 | -8,62E-01 | -1,02475577  | 3,40E+00 | 6,50E-02 | 3,19E-01 | Camsap3       | 0,55 | No  |
| ENSMUSG00000044434 | 1,32E-01  | 4,355437396  | 2,53E+00 | 1,12E-01 | 4,11E-01 | Gm9791        | 1,10 | No  |
| ENSMUSG00000044442 | 2,40E-03  | 3,281615197  | 5,17E-04 | 9,82E-01 | 1,00E+00 | N6amt1        | 1,00 | No  |
| ENSMUSG00000044447 | 1,97E-01  | 5,697829099  | 8,39E+00 | 3,77E-03 | 4,53E-02 | Dock5         | 1,15 | Yes |
| ENSMUSG00000044452 | -3,50E-01 | -0,10771093  | 1,36E+00 | 2,44E-01 | 5,50E-01 | Zfp507        | 0,78 | No  |
| ENSMUSG00000044453 | -2,70E-01 | -1,68313162  | 2,37E-01 | 6,26E-01 | 8,60E-01 | Ffar1         | 0,83 | No  |
| ENSMUSG00000044456 | 1,68E-01  | 7,90467826   | 8,24E+00 | 4,10E-03 | 4,82E-02 | Rin3          | 1,12 | Yes |
| ENSMUSG00000044457 | -1,87E+00 | -3,107637761 | 1,39E+00 | 2,38E-01 | 5,50E-01 | Stk-ps2       | 0,27 | No  |
| ENSMUSG00000044461 | -2,63E-02 | -3,033653157 | 2,33E-04 | 9,88E-01 | 1,00E+00 | Shisa2        | 0,98 | No  |

|                    |           |              |           |          |          |               |      |     |
|--------------------|-----------|--------------|-----------|----------|----------|---------------|------|-----|
| ENSMUSG00000044465 | 5,73E-02  | 3,279957998  | 3,03E-01  | 5,82E-01 | 8,38E-01 | Fam160a2      | 1,04 | No  |
| ENSMUSG00000044468 | 8,68E-02  | 5,815030237  | 1,68E+00  | 1,95E-01 | 5,50E-01 | Fam46c        | 1,06 | No  |
| ENSMUSG00000044469 | 2,55E-01  | 2,898784505  | 4,75E+00  | 2,93E-02 | 1,95E-01 | Tnfaip8l1     | 1,19 | No  |
| ENSMUSG00000044471 | 1,53E-01  | 0,062310212  | 2,72E-01  | 6,02E-01 | 8,48E-01 | Lncpint       | 1,11 | No  |
| ENSMUSG00000044475 | 1,36E-01  | 3,358644665  | 1,75E+00  | 1,85E-01 | 5,49E-01 | Ascc1         | 1,10 | No  |
| ENSMUSG00000044477 | -2,49E-01 | 6,425566383  | 1,55E+01  | 8,07E-05 | 2,03E-03 | Zfand3        | 0,84 | Yes |
| ENSMUSG00000044485 | 4,58E-01  | 7,900217545  | 6,06E+01  | 6,95E-15 | 1,06E-12 | Klk1b11       | 1,37 | Yes |
| ENSMUSG00000044496 | 1,64E-02  | 6,810389491  | 7,15E-02  | 7,89E-01 | 9,54E-01 | 2510039O18Rik | 1,01 | No  |
| ENSMUSG00000044501 | -1,16E-01 | 2,943750822  | 1,05E+00  | 3,05E-01 | 6,01E-01 | Zfp758        | 0,92 | No  |
| ENSMUSG00000044502 | 1,70E-01  | 3,503787811  | 2,94E+00  | 8,66E-02 | 3,78E-01 | Bod1          | 1,13 | No  |
| ENSMUSG00000044518 | 1,81E+00  | -3,10765737  | 1,28E+00  | 2,58E-01 | 5,50E-01 | Foxe3         | 3,49 | No  |
| ENSMUSG00000044519 | -4,13E-02 | -3,033659495 | 7,08E-04  | 9,79E-01 | 1,00E+00 | Zfp488        | 0,97 | No  |
| ENSMUSG00000044522 | -5,56E-01 | -1,997994108 | 6,75E-01  | 4,11E-01 | 7,07E-01 | A730020M07Rik | 0,68 | No  |
| ENSMUSG00000044528 | 3,14E-02  | -3,107617333 | -7,69E-10 | 1,00E+00 | 1,00E+00 | Tram1l1       | 1,02 | No  |
| ENSMUSG00000044533 | -1,59E-02 | 7,570439694  | 7,24E-02  | 7,88E-01 | 9,53E-01 | Rps2          | 0,99 | No  |
| ENSMUSG00000044534 | 1,08E+00  | -2,401372133 | 1,51E+00  | 2,20E-01 | 5,50E-01 | Ackr2         | 2,12 | No  |
| ENSMUSG00000044544 | 3,14E-02  | -3,107617333 | -7,69E-10 | 1,00E+00 | 1,00E+00 | 4921513I03Rik | 1,02 | No  |
| ENSMUSG00000044548 | -2,21E-01 | -1,448636921 | 1,68E-01  | 6,82E-01 | 8,94E-01 | Dact1         | 0,86 | No  |
| ENSMUSG00000044551 | 1,99E-01  | 1,508097306  | 1,30E+00  | 2,54E-01 | 5,50E-01 | 9930012K11Rik | 1,15 | No  |
| ENSMUSG00000044556 | -8,67E-02 | -2,89613315  | 3,24E-03  | 9,55E-01 | 1,00E+00 | Tex38         | 0,94 | No  |
| ENSMUSG00000044562 | -5,95E-01 | 0,31005672   | 5,41E+00  | 2,00E-02 | 1,51E-01 | Rasip1        | 0,66 | No  |
| ENSMUSG00000044566 | 1,26E-01  | 0,915417498  | 3,72E-01  | 5,42E-01 | 8,11E-01 | Cage1         | 1,09 | No  |
| ENSMUSG00000044573 | -1,90E-02 | 4,889921212  | 6,38E-02  | 8,01E-01 | 9,61E-01 | Acp1          | 0,99 | No  |
| ENSMUSG00000044576 | 4,21E-01  | -2,800943341 | 8,81E-02  | 7,67E-01 | 9,40E-01 | Garem2        | 1,34 | No  |
| ENSMUSG00000044581 | -1,87E+00 | -3,107637761 | 1,39E+00  | 2,38E-01 | 5,50E-01 | 4932415D10Rik | 0,27 | No  |
| ENSMUSG00000044595 | 2,95E-01  | 0,388899528  | 1,27E+00  | 2,59E-01 | 5,52E-01 | Dnd1          | 1,23 | No  |
| ENSMUSG00000044600 | 9,81E-02  | 6,035015468  | 2,25E+00  | 1,33E-01 | 4,59E-01 | Smim7         | 1,07 | No  |
| ENSMUSG00000044609 | -1,77E-01 | 6,539799171  | 8,00E+00  | 4,67E-03 | 5,31E-02 | Gm9294        | 0,88 | No  |
| ENSMUSG00000044617 | -1,68E-01 | 3,798771869  | 3,32E+00  | 6,83E-02 | 3,29E-01 | Zbtb39        | 0,89 | No  |
| ENSMUSG00000044624 | 3,14E-02  | -3,107617333 | -7,69E-10 | 1,00E+00 | 1,00E+00 | Gm4922        | 1,02 | No  |
| ENSMUSG00000044626 | -3,02E-01 | -0,226431049 | 9,16E-01  | 3,39E-01 | 6,39E-01 | Liph          | 0,81 | No  |
| ENSMUSG00000044627 | -7,63E-02 | 5,864312628  | 1,33E+00  | 2,50E-01 | 5,50E-01 | Swi5          | 0,95 | No  |



|                    |           |              |          |          |          |               |      |     |
|--------------------|-----------|--------------|----------|----------|----------|---------------|------|-----|
| ENSMUSG00000044628 | 5,02E-01  | -1,18567977  | 1,21E+00 | 2,71E-01 | 5,67E-01 | Rnf208        | 1,42 | No  |
| ENSMUSG00000044629 | -4,93E-03 | -1,522598022 | 6,98E-05 | 9,93E-01 | 1,00E+00 | Cnrip1        | 1,00 | No  |
| ENSMUSG00000044636 | 6,81E-02  | 2,302175412  | 2,55E-01 | 6,13E-01 | 8,53E-01 | Csrnp2        | 1,05 | No  |
| ENSMUSG00000044641 | 3,27E-01  | -0,216216053 | 1,07E+00 | 3,00E-01 | 5,96E-01 | Pard6b        | 1,25 | No  |
| ENSMUSG00000044645 | -1,32E-01 | 3,311231639  | 1,56E+00 | 2,12E-01 | 5,50E-01 | Gm7334        | 0,91 | No  |
| ENSMUSG00000044646 | -6,21E-01 | -2,07006663  | 7,49E-01 | 3,87E-01 | 6,87E-01 | Zbtb7c        | 0,65 | No  |
| ENSMUSG00000044647 | 6,93E-02  | -0,863648822 | 2,68E-02 | 8,70E-01 | 1,00E+00 | Csrnp3        | 1,05 | No  |
| ENSMUSG00000044664 | -1,87E+00 | -3,03364178  | 1,41E+00 | 2,36E-01 | 5,50E-01 | Prss42        | 0,27 | No  |
| ENSMUSG00000044667 | -3,94E-01 | 1,200801787  | 4,53E+00 | 3,33E-02 | 2,14E-01 | Plppr4        | 0,76 | No  |
| ENSMUSG00000044674 | -1,10E-01 | 2,180990348  | 5,81E-01 | 4,46E-01 | 7,37E-01 | Fzd1          | 0,93 | No  |
| ENSMUSG00000044681 | -1,68E+00 | -1,831955941 | 6,61E+00 | 1,01E-02 | 9,42E-02 | Cnpy1         | 0,31 | No  |
| ENSMUSG00000044694 | 2,74E-02  | -3,033621357 | 9,16E-12 | 1,00E+00 | 1,00E+00 | 2010007H06Rik | 1,02 | No  |
| ENSMUSG00000044697 | -1,28E-01 | 1,25536828   | 4,64E-01 | 4,96E-01 | 7,81E-01 | Gm5479        | 0,91 | No  |
| ENSMUSG00000044700 | 3,62E-02  | 3,859734672  | 1,57E-01 | 6,92E-01 | 9,00E-01 | Tmem201       | 1,03 | No  |
| ENSMUSG00000044701 | -1,02E-01 | 1,322413689  | 2,93E-01 | 5,88E-01 | 8,40E-01 | Il27          | 0,93 | No  |
| ENSMUSG00000044702 | 3,40E-01  | 3,170208672  | 1,05E+01 | 1,20E-03 | 1,88E-02 | Palb2         | 1,27 | Yes |
| ENSMUSG00000044703 | -5,14E-01 | 1,041178655  | 6,86E+00 | 8,83E-03 | 8,52E-02 | Phf11a        | 0,70 | No  |
| ENSMUSG00000044707 | -1,87E+00 | -3,107637761 | 1,39E+00 | 2,38E-01 | 5,50E-01 | Ccnjl         | 0,27 | No  |
| ENSMUSG00000044708 | -4,76E-02 | 2,933586697  | 1,71E-01 | 6,79E-01 | 8,93E-01 | Kcnj10        | 0,97 | No  |
| ENSMUSG00000044709 | -1,36E-01 | 5,098617274  | 3,52E+00 | 6,06E-02 | 3,05E-01 | Gemin7        | 0,91 | No  |
| ENSMUSG00000044712 | 2,61E-01  | 5,061511408  | 1,25E+01 | 3,97E-04 | 7,57E-03 | Slc38a6       | 1,20 | Yes |
| ENSMUSG00000044715 | 5,72E-02  | 5,042332753  | 6,12E-01 | 4,34E-01 | 7,27E-01 | Gskip         | 1,04 | No  |
| ENSMUSG00000044716 | -1,43E-01 | 3,686904108  | 2,31E+00 | 1,29E-01 | 4,50E-01 | Dok7          | 0,91 | No  |
| ENSMUSG00000044719 | 2,97E-01  | -2,448745626 | 9,01E-02 | 7,64E-01 | 9,39E-01 | E230025N22Rik | 1,23 | No  |
| ENSMUSG00000044724 | -9,31E-01 | -2,770598494 | 7,58E-01 | 3,84E-01 | 6,85E-01 | Gpr152        | 0,52 | No  |
| ENSMUSG00000044726 | -1,35E+00 | -2,711637134 | 1,13E+00 | 2,87E-01 | 5,83E-01 | Erich5        | 0,39 | No  |
| ENSMUSG00000044730 | 3,25E-02  | 4,04796149   | 1,38E-01 | 7,11E-01 | 9,10E-01 | 9930104L06Rik | 1,02 | No  |
| ENSMUSG00000044734 | -3,92E-01 | 2,491335229  | 9,11E+00 | 2,54E-03 | 3,37E-02 | Serpnb1a      | 0,76 | Yes |
| ENSMUSG00000044737 | 2,65E+00  | -3,033655087 | 2,73E+00 | 9,86E-02 | 3,91E-01 | Klk14         | 6,30 | No  |
| ENSMUSG00000044749 | 4,20E-01  | -0,205926726 | 1,69E+00 | 1,94E-01 | 5,50E-01 | Abca6         | 1,34 | No  |
| ENSMUSG00000044751 | 1,40E-02  | 6,780308224  | 5,14E-02 | 8,21E-01 | 9,72E-01 | Gm12231       | 1,01 | No  |
| ENSMUSG00000044757 | 6,59E-02  | 5,635546654  | 9,36E-01 | 3,33E-01 | 6,34E-01 | Gm6430        | 1,05 | No  |

|                    |           |              |           |          |          |               |      |     |
|--------------------|-----------|--------------|-----------|----------|----------|---------------|------|-----|
| ENSMUSG00000044763 | -2,10E-03 | 4,151950041  | 5,99E-04  | 9,80E-01 | 1,00E+00 | Trmt10c       | 1,00 | No  |
| ENSMUSG00000044768 | 1,30E-01  | 5,988361566  | 3,93E+00  | 4,73E-02 | 2,60E-01 | D1Ertd622e    | 1,09 | No  |
| ENSMUSG00000044770 | 5,60E-01  | -0,574374688 | 2,35E+00  | 1,26E-01 | 4,44E-01 | Scml4         | 1,47 | No  |
| ENSMUSG00000044783 | 2,02E-01  | 7,242349435  | 1,14E+01  | 7,36E-04 | 1,26E-02 | Hjurp         | 1,15 | Yes |
| ENSMUSG00000044786 | 4,35E-01  | 8,477310774  | 5,56E+01  | 9,06E-14 | 1,26E-11 | Zfp36         | 1,35 | Yes |
| ENSMUSG00000044787 | -1,41E-01 | -1,247046981 | 1,00E-01  | 7,52E-01 | 9,32E-01 | Spata32       | 0,91 | No  |
| ENSMUSG00000044788 | 3,98E-02  | 2,041130723  | 7,45E-02  | 7,85E-01 | 9,51E-01 | Fads6         | 1,03 | No  |
| ENSMUSG00000044791 | -6,20E-02 | 7,00961833   | 1,05E+00  | 3,06E-01 | 6,04E-01 | Setd2         | 0,96 | No  |
| ENSMUSG00000044792 | 1,30E-01  | 5,116854469  | 3,17E+00  | 7,49E-02 | 3,48E-01 | Isca1         | 1,09 | No  |
| ENSMUSG00000044795 | 9,54E-02  | 3,177465644  | 7,93E-01  | 3,73E-01 | 6,74E-01 | Cyb5d1        | 1,07 | No  |
| ENSMUSG00000044807 | -4,54E-01 | -2,070172257 | 3,80E-01  | 5,38E-01 | 8,09E-01 | Zfp354c       | 0,73 | No  |
| ENSMUSG00000044811 | 1,28E-01  | 7,015339709  | 4,45E+00  | 3,49E-02 | 2,21E-01 | Cd300c2       | 1,09 | No  |
| ENSMUSG00000044813 | -2,06E-01 | 4,009634406  | 5,34E+00  | 2,08E-02 | 1,55E-01 | Shb           | 0,87 | No  |
| ENSMUSG00000044814 | 4,98E-01  | -0,24702186  | 2,09E+00  | 1,48E-01 | 4,88E-01 | Olfr543       | 1,41 | No  |
| ENSMUSG00000044816 | -4,78E-01 | -0,011215248 | 2,70E+00  | 1,01E-01 | 3,92E-01 | D630023F18Rik | 0,72 | No  |
| ENSMUSG00000044819 | -1,87E+00 | -3,107637761 | 1,39E+00  | 2,38E-01 | 5,50E-01 | Oxgr1         | 0,27 | No  |
| ENSMUSG00000044820 | -1,92E-02 | -0,748231865 | 2,36E-03  | 9,61E-01 | 1,00E+00 | AY074887      | 0,99 | No  |
| ENSMUSG00000044824 | -1,24E+00 | -2,548227111 | 1,48E+00  | 2,23E-01 | 5,50E-01 | Olfr545       | 0,42 | No  |
| ENSMUSG00000044827 | -5,13E-01 | 3,318414177  | 2,43E+01  | 8,42E-07 | 3,82E-05 | Tlr1          | 0,70 | Yes |
| ENSMUSG00000044835 | 1,00E+00  | -1,832015556 | 2,30E+00  | 1,29E-01 | 4,51E-01 | Ankrd45       | 2,00 | No  |
| ENSMUSG00000044847 | 1,22E-01  | 3,281811655  | 1,36E+00  | 2,44E-01 | 5,50E-01 | Lsm11         | 1,09 | No  |
| ENSMUSG00000044854 | 5,53E-02  | -0,683061243 | 1,89E-02  | 8,91E-01 | 1,00E+00 | 1700056E22Rik | 1,04 | No  |
| ENSMUSG00000044857 | 2,66E-01  | 5,978411864  | 1,66E+01  | 4,70E-05 | 1,29E-03 | Lemd2         | 1,20 | Yes |
| ENSMUSG00000044860 | 3,13E-01  | -1,54819901  | 2,83E-01  | 5,95E-01 | 8,44E-01 | Gm1123        | 1,24 | No  |
| ENSMUSG00000044864 | 2,48E-02  | 5,116253466  | 1,15E-01  | 7,34E-01 | 9,24E-01 | Ankrd50       | 1,02 | No  |
| ENSMUSG00000044867 | 2,44E-01  | -0,694925456 | 4,16E-01  | 5,19E-01 | 7,98E-01 | Gimap1os      | 1,18 | No  |
| ENSMUSG00000044876 | 4,95E-02  | 4,00671084   | 3,16E-01  | 5,74E-01 | 8,33E-01 | Zfp444        | 1,03 | No  |
| ENSMUSG00000044881 | -4,02E-03 | 3,430279446  | 1,64E-03  | 9,68E-01 | 1,00E+00 | Coa4          | 1,00 | No  |
| ENSMUSG00000044894 | -2,71E-02 | 5,989667791  | 1,70E-01  | 6,80E-01 | 8,93E-01 | Uqcrq         | 0,98 | No  |
| ENSMUSG00000044903 | 9,01E-03  | -3,107646452 | -5,16E-10 | 1,00E+00 | 1,00E+00 | Psg22         | 1,01 | No  |
| ENSMUSG00000044906 | 5,91E-02  | 5,186879818  | 6,71E-01  | 4,13E-01 | 7,08E-01 | 4930503L19Rik | 1,04 | No  |
| ENSMUSG00000044912 | -1,94E+00 | -3,107619243 | 1,50E+00  | 2,21E-01 | 5,50E-01 | Syt16         | 0,26 | No  |

|                    |           |              |           |          |          |               |      |     |
|--------------------|-----------|--------------|-----------|----------|----------|---------------|------|-----|
| ENSMUSG00000044916 | 2,24E-01  | 0,355018096  | 7,70E-01  | 3,80E-01 | 6,81E-01 | 1700029I15Rik | 1,17 | No  |
| ENSMUSG00000044927 | -5,49E-01 | 2,817314033  | 2,21E+01  | 2,56E-06 | 1,00E-04 | H1fx          | 0,68 | Yes |
| ENSMUSG00000044934 | 1,05E-01  | 4,937408318  | 1,96E+00  | 1,61E-01 | 5,10E-01 | Zfp367        | 1,08 | No  |
| ENSMUSG00000044937 | 4,25E-01  | 0,316982388  | 2,54E+00  | 1,11E-01 | 4,09E-01 | Ttc41         | 1,34 | No  |
| ENSMUSG00000044948 | 1,69E-01  | 4,959708325  | 5,21E+00  | 2,25E-02 | 1,63E-01 | Cfap43        | 1,12 | No  |
| ENSMUSG00000044949 | -4,69E-03 | 2,439381408  | 1,29E-03  | 9,71E-01 | 1,00E+00 | Ubtd2         | 1,00 | No  |
| ENSMUSG00000044950 | -3,34E-02 | 3,958486443  | 1,42E-01  | 7,06E-01 | 9,08E-01 | Pwwp2a        | 0,98 | No  |
| ENSMUSG00000044951 | -5,20E+00 | -2,401271954 | 1,88E+01  | 1,48E-05 | 4,74E-04 | Mylk4         | 0,03 | Yes |
| ENSMUSG00000044952 | 2,49E-01  | 2,487987888  | 3,83E+00  | 5,03E-02 | 2,72E-01 | Kctd21        | 1,19 | No  |
| ENSMUSG00000044957 | 6,75E-02  | 0,686259338  | 8,76E-02  | 7,67E-01 | 9,40E-01 | Pp2d1         | 1,05 | No  |
| ENSMUSG00000044966 | 3,24E-01  | 1,943654274  | 4,66E+00  | 3,09E-02 | 2,03E-01 | Fbxo48        | 1,25 | No  |
| ENSMUSG00000044968 | 5,18E-02  | 2,836668401  | 2,00E-01  | 6,55E-01 | 8,79E-01 | Napepld       | 1,04 | No  |
| ENSMUSG00000044976 | -1,87E+00 | -3,107637761 | 1,39E+00  | 2,38E-01 | 5,50E-01 | Wdr72         | 0,27 | No  |
| ENSMUSG00000044982 | -2,48E-02 | 2,997317443  | 4,69E-02  | 8,29E-01 | 9,76E-01 | Sft2d3        | 0,98 | No  |
| ENSMUSG00000044986 | 4,25E-02  | 2,469238175  | 1,04E-01  | 7,48E-01 | 9,30E-01 | Tst           | 1,03 | No  |
| ENSMUSG00000044991 | -3,80E-02 | 2,342684954  | 7,89E-02  | 7,79E-01 | 9,47E-01 | 1110034G24Rik | 0,97 | No  |
| ENSMUSG00000044994 | -1,98E-02 | -3,033655952 | 2,83E-11  | 1,00E+00 | 1,00E+00 | Olf1426       | 0,99 | No  |
| ENSMUSG00000044997 | -2,20E-02 | -3,107647797 | 1,16E-04  | 9,91E-01 | 1,00E+00 | E130304I02Rik | 0,98 | No  |
| ENSMUSG00000045004 | 2,94E-01  | -1,655196537 | 2,49E-01  | 6,17E-01 | 8,55E-01 | Spata21       | 1,23 | No  |
| ENSMUSG00000045005 | 1,64E-01  | 3,753112716  | 3,07E+00  | 7,99E-02 | 3,62E-01 | Fzd5          | 1,12 | No  |
| ENSMUSG00000045007 | 3,14E-01  | -0,038383968 | 1,11E+00  | 2,92E-01 | 5,87E-01 | Tubg2         | 1,24 | No  |
| ENSMUSG00000045009 | -1,67E-01 | -0,785630292 | 1,82E-01  | 6,70E-01 | 8,88E-01 | Prrt3         | 0,89 | No  |
| ENSMUSG00000045027 | 1,27E+00  | -2,896151645 | 1,00E+00  | 3,17E-01 | 6,17E-01 | Prss22        | 2,41 | No  |
| ENSMUSG00000045031 | -4,75E-01 | 0,592909157  | 4,18E+00  | 4,09E-02 | 2,40E-01 | Cetn4         | 0,72 | No  |
| ENSMUSG00000045034 | -6,19E-02 | -2,832032244 | 1,69E-03  | 9,67E-01 | 1,00E+00 | Ankrd34b      | 0,96 | No  |
| ENSMUSG00000045036 | -3,83E-02 | -3,107651936 | -7,91E-11 | 1,00E+00 | 1,00E+00 | Tmem232       | 0,97 | No  |
| ENSMUSG00000045038 | 1,65E-01  | 3,378820558  | 2,50E+00  | 1,14E-01 | 4,17E-01 | Prkce         | 1,12 | No  |
| ENSMUSG00000045039 | 2,46E-02  | 5,973479607  | 1,41E-01  | 7,07E-01 | 9,08E-01 | Megf8         | 1,02 | No  |
| ENSMUSG00000045045 | 1,11E-01  | 3,645663165  | 1,28E+00  | 2,57E-01 | 5,50E-01 | Lrfn4         | 1,08 | No  |
| ENSMUSG00000045048 | 4,17E-01  | 0,26622847   | 2,36E+00  | 1,25E-01 | 4,42E-01 | Gm9795        | 1,34 | No  |
| ENSMUSG00000045052 | 1,78E+00  | -2,963287612 | 1,28E+00  | 2,58E-01 | 5,50E-01 | Prlhr         | 3,44 | No  |
| ENSMUSG00000045053 | -1,59E+00 | -1,683096091 | 7,80E+00  | 5,24E-03 | 5,78E-02 | Kcng3         | 0,33 | No  |

|                    |           |              |           |          |          |               |      |     |
|--------------------|-----------|--------------|-----------|----------|----------|---------------|------|-----|
| ENSMUSG00000045055 | -2,28E-01 | 8,104886767  | 1,54E+01  | 8,59E-05 | 2,14E-03 | Rpsa-ps2      | 0,85 | Yes |
| ENSMUSG00000045062 | -1,91E+00 | -2,963238542 | 1,45E+00  | 2,29E-01 | 5,50E-01 | Pcdhb7        | 0,27 | No  |
| ENSMUSG00000045064 | 4,72E-01  | 0,612859368  | 3,87E+00  | 4,92E-02 | 2,68E-01 | Zc2hc1c       | 1,39 | No  |
| ENSMUSG00000045065 | -3,14E-01 | 0,09578906   | 1,21E+00  | 2,71E-01 | 5,67E-01 | 9930022D16Rik | 0,80 | No  |
| ENSMUSG00000045071 | 1,98E-01  | 3,155811244  | 3,23E+00  | 7,25E-02 | 3,41E-01 | E130308A19Rik | 1,15 | No  |
| ENSMUSG00000045075 | 9,38E-02  | 0,493251397  | 1,40E-01  | 7,09E-01 | 9,09E-01 | Gm9796        | 1,07 | No  |
| ENSMUSG00000045078 | -7,26E-02 | 6,266796327  | 1,29E+00  | 2,56E-01 | 5,50E-01 | Rnf216        | 0,95 | No  |
| ENSMUSG00000045083 | -1,98E-02 | -3,033655952 | 2,83E-11  | 1,00E+00 | 1,00E+00 | Lingo2        | 0,99 | No  |
| ENSMUSG00000045087 | -9,30E-01 | -2,770634646 | 7,57E-01  | 3,84E-01 | 6,86E-01 | S1pr5         | 0,52 | No  |
| ENSMUSG00000045091 | -6,11E-01 | -2,401328975 | 5,09E-01  | 4,76E-01 | 7,64E-01 | Aqp12         | 0,65 | No  |
| ENSMUSG00000045092 | -1,03E+00 | -0,522500661 | 8,17E+00  | 4,25E-03 | 4,95E-02 | S1pr1         | 0,49 | Yes |
| ENSMUSG00000045094 | 2,42E-01  | 0,957076255  | 1,25E+00  | 2,63E-01 | 5,58E-01 | Arhgef37      | 1,18 | No  |
| ENSMUSG00000045095 | -6,16E-01 | -1,998031002 | 9,58E-01  | 3,28E-01 | 6,29E-01 | Magi1         | 0,65 | No  |
| ENSMUSG00000045098 | 9,89E-02  | 5,8277322    | 2,22E+00  | 1,36E-01 | 4,65E-01 | Kmt5b         | 1,07 | No  |
| ENSMUSG00000045100 | -3,61E-02 | 2,308080374  | 7,07E-02  | 7,90E-01 | 9,54E-01 | Slc25a26      | 0,98 | No  |
| ENSMUSG00000045102 | 5,27E-01  | -0,466983647 | 2,05E+00  | 1,52E-01 | 4,94E-01 | Poln          | 1,44 | No  |
| ENSMUSG00000045104 | 5,46E-01  | 2,284772633  | 1,48E+01  | 1,22E-04 | 2,87E-03 | Gm5514        | 1,46 | Yes |
| ENSMUSG00000045106 | -2,21E-01 | 0,894537018  | 1,04E+00  | 3,07E-01 | 6,05E-01 | Ccdc73        | 0,86 | No  |
| ENSMUSG00000045107 | 1,03E-01  | 2,448909894  | 5,98E-01  | 4,39E-01 | 7,32E-01 | Saysd1        | 1,07 | No  |
| ENSMUSG00000045114 | 1,11E-01  | -0,937719447 | 7,20E-02  | 7,88E-01 | 9,54E-01 | Prrt2         | 1,08 | No  |
| ENSMUSG00000045126 | -3,88E-03 | -3,03362684  | 4,02E-12  | 1,00E+00 | 1,00E+00 | Olf1445       | 1,00 | No  |
| ENSMUSG00000045128 | -8,89E-02 | 5,643534737  | 1,72E+00  | 1,90E-01 | 5,50E-01 | Rpl18a        | 0,94 | No  |
| ENSMUSG00000045132 | 9,01E-03  | -3,107646452 | -5,16E-10 | 1,00E+00 | 1,00E+00 | Olf1620       | 1,01 | No  |
| ENSMUSG00000045136 | -2,34E-01 | 4,739315057  | 9,24E+00  | 2,36E-03 | 3,20E-02 | Tubb2b        | 0,85 | Yes |
| ENSMUSG00000045140 | 5,89E-03  | 2,184819898  | 1,73E-03  | 9,67E-01 | 1,00E+00 | Pigw          | 1,00 | No  |
| ENSMUSG00000045160 | -3,74E-02 | 3,624462194  | 1,50E-01  | 6,99E-01 | 9,04E-01 | Bola3         | 0,97 | No  |
| ENSMUSG00000045165 | 1,40E-02  | 5,001764276  | 3,58E-02  | 8,50E-01 | 9,89E-01 | AI467606      | 1,01 | No  |
| ENSMUSG00000045174 | -5,23E-02 | -2,963267963 | 1,24E-03  | 9,72E-01 | 1,00E+00 | Amer3         | 0,96 | No  |
| ENSMUSG00000045176 | 2,10E-01  | 4,942517965  | 7,98E+00  | 4,72E-03 | 5,35E-02 | Borcs6        | 1,16 | No  |
| ENSMUSG00000045193 | -3,00E-01 | 4,695033747  | 1,47E+01  | 1,26E-04 | 2,95E-03 | Cirbp         | 0,81 | Yes |
| ENSMUSG00000045201 | 1,81E+00  | -3,10765737  | 1,28E+00  | 2,58E-01 | 5,50E-01 | Lrrc3b        | 3,49 | No  |
| ENSMUSG00000045205 | 2,22E-01  | 5,673871225  | 1,08E+01  | 1,04E-03 | 1,67E-02 | Dpy19l4       | 1,17 | Yes |

|                    |           |              |           |          |          |               |      |     |
|--------------------|-----------|--------------|-----------|----------|----------|---------------|------|-----|
| ENSMUSG00000045210 | 1,19E-01  | 6,27954704   | 3,49E+00  | 6,16E-02 | 3,09E-01 | Vcpip1        | 1,09 | No  |
| ENSMUSG00000045211 | -1,67E-01 | 4,927643772  | 5,03E+00  | 2,50E-02 | 1,75E-01 | Nudt18        | 0,89 | No  |
| ENSMUSG00000045215 | 1,87E+00  | -3,107639691 | 1,38E+00  | 2,40E-01 | 5,50E-01 | Asxl3         | 3,67 | No  |
| ENSMUSG00000045216 | 1,02E-01  | 5,256012277  | 2,03E+00  | 1,55E-01 | 4,98E-01 | Hs6st1        | 1,07 | No  |
| ENSMUSG00000045225 | 9,01E-03  | -3,107646452 | -5,16E-10 | 1,00E+00 | 1,00E+00 | Olfr1152      | 1,01 | No  |
| ENSMUSG00000045231 | 5,75E-01  | 0,686152762  | 5,91E+00  | 1,51E-02 | 1,26E-01 | BC106179      | 1,49 | No  |
| ENSMUSG00000045232 | -1,87E+00 | -3,107637761 | 1,39E+00  | 2,38E-01 | 5,50E-01 | Rln3          | 0,27 | No  |
| ENSMUSG00000045238 | -5,47E-01 | -1,117179868 | 1,52E+00  | 2,17E-01 | 5,50E-01 | A730035I17Rik | 0,68 | No  |
| ENSMUSG00000045248 | 1,55E-01  | 3,454707216  | 2,41E+00  | 1,20E-01 | 4,33E-01 | Med26         | 1,11 | No  |
| ENSMUSG00000045251 | -1,21E-01 | 3,267399473  | 1,34E+00  | 2,48E-01 | 5,50E-01 | Zfp688        | 0,92 | No  |
| ENSMUSG00000045252 | -3,75E-02 | 3,893893292  | 1,76E-01  | 6,75E-01 | 8,91E-01 | Zfp574        | 0,97 | No  |
| ENSMUSG00000045257 | 6,65E-02  | -0,350024734 | 3,76E-02  | 8,46E-01 | 9,87E-01 | Morn2         | 1,05 | No  |
| ENSMUSG00000045259 | -2,11E-01 | 1,118108418  | 1,15E+00  | 2,84E-01 | 5,81E-01 | Klhdc9        | 0,86 | No  |
| ENSMUSG00000045268 | -1,22E-01 | 1,18131031   | 4,30E-01  | 5,12E-01 | 7,95E-01 | Zfp691        | 0,92 | No  |
| ENSMUSG00000045273 | 6,95E-02  | 2,502778057  | 2,85E-01  | 5,94E-01 | 8,43E-01 | Cenph         | 1,05 | No  |
| ENSMUSG00000045275 | -8,36E-02 | -2,311171455 | 6,24E-03  | 9,37E-01 | 1,00E+00 | Lca5l         | 0,94 | No  |
| ENSMUSG00000045282 | 5,17E-02  | 2,838013335  | 1,94E-01  | 6,60E-01 | 8,82E-01 | Tmem86b       | 1,04 | No  |
| ENSMUSG00000045287 | 2,22E-01  | 1,999030221  | 2,18E+00  | 1,40E-01 | 4,72E-01 | Rtn4rl1       | 1,17 | No  |
| ENSMUSG00000045291 | 1,81E+00  | -3,10765737  | 1,28E+00  | 2,58E-01 | 5,50E-01 | E330021D16Rik | 3,49 | No  |
| ENSMUSG00000045294 | 2,59E-01  | 6,556803848  | 1,71E+01  | 3,63E-05 | 1,04E-03 | Insig1        | 1,20 | Yes |
| ENSMUSG00000045302 | 4,42E-02  | 6,64824211   | 5,10E-01  | 4,75E-01 | 7,63E-01 | Preb          | 1,03 | No  |
| ENSMUSG00000045312 | 2,75E-01  | 6,944412745  | 2,04E+01  | 6,21E-06 | 2,19E-04 | Lhfp12        | 1,21 | Yes |
| ENSMUSG00000045314 | 2,34E-01  | -2,497648324 | 6,91E-02  | 7,93E-01 | 9,56E-01 | Sowahb        | 1,18 | No  |
| ENSMUSG00000045316 | -7,86E-02 | 1,850188473  | 2,49E-01  | 6,18E-01 | 8,55E-01 | Fahd1         | 0,95 | No  |
| ENSMUSG00000045318 | -6,38E-02 | -0,509892729 | 2,85E-02  | 8,66E-01 | 9,99E-01 | Adra2c        | 0,96 | No  |
| ENSMUSG00000045319 | 1,29E-01  | 1,814268878  | 6,32E-01  | 4,27E-01 | 7,21E-01 | Proser2       | 1,09 | No  |
| ENSMUSG00000045322 | 2,56E-01  | 4,972581208  | 1,19E+01  | 5,58E-04 | 1,00E-02 | Tlr9          | 1,19 | Yes |
| ENSMUSG00000045326 | 6,17E-01  | 0,16000752   | 4,74E+00  | 2,94E-02 | 1,95E-01 | Fndc7         | 1,53 | No  |
| ENSMUSG00000045327 | -1,51E-01 | 3,835998635  | 2,65E+00  | 1,04E-01 | 3,95E-01 | 6330549D23Rik | 0,90 | No  |
| ENSMUSG00000045328 | 3,12E-01  | 6,082933012  | 2,30E+01  | 1,58E-06 | 6,66E-05 | Cenpe         | 1,24 | Yes |
| ENSMUSG00000045333 | -2,66E+00 | -3,033639428 | 2,81E+00  | 9,35E-02 | 3,83E-01 | Zfp423        | 0,16 | No  |
| ENSMUSG00000045345 | -5,09E-02 | -2,045623798 | 5,48E-03  | 9,41E-01 | 1,00E+00 | 9530056K15Rik | 0,97 | No  |

|                    |           |              |          |          |          |               |      |     |
|--------------------|-----------|--------------|----------|----------|----------|---------------|------|-----|
| ENSMUSG00000045348 | 1,58E-01  | -1,051972488 | 1,45E-01 | 7,04E-01 | 9,06E-01 | Nyap1         | 1,12 | No  |
| ENSMUSG00000045349 | -7,77E-01 | 3,494239489  | 6,42E+01 | 1,15E-15 | 1,91E-13 | Sh2d5         | 0,58 | Yes |
| ENSMUSG00000045350 | -5,57E-01 | -2,832008579 | 2,42E-01 | 6,23E-01 | 8,58E-01 | Fam186a       | 0,68 | No  |
| ENSMUSG00000045362 | 8,07E-02  | 5,322188864  | 1,29E+00 | 2,56E-01 | 5,50E-01 | Tnfrsf26      | 1,06 | No  |
| ENSMUSG00000045374 | 2,46E-01  | 7,059739076  | 1,65E+01 | 4,92E-05 | 1,34E-03 | Wdr81         | 1,19 | Yes |
| ENSMUSG00000045377 | -4,84E-02 | 1,836254248  | 8,96E-02 | 7,65E-01 | 9,39E-01 | Tmem88        | 0,97 | No  |
| ENSMUSG00000045378 | -5,13E-01 | -2,832036919 | 1,32E-01 | 7,16E-01 | 9,13E-01 | Pxt1          | 0,70 | No  |
| ENSMUSG00000045381 | 8,36E-02  | -1,683071424 | 1,87E-02 | 8,91E-01 | 1,00E+00 | Olfr433       | 1,06 | No  |
| ENSMUSG00000045382 | -9,50E-02 | 5,252193015  | 1,80E+00 | 1,79E-01 | 5,40E-01 | Cxcr4         | 0,94 | No  |
| ENSMUSG00000045391 | 1,79E-01  | 0,932237772  | 7,08E-01 | 4,00E-01 | 6,99E-01 | 1700120B22Rik | 1,13 | No  |
| ENSMUSG00000045392 | 4,74E-01  | -2,600680117 | 1,75E-01 | 6,76E-01 | 8,91E-01 | Olfr1033      | 1,39 | No  |
| ENSMUSG00000045394 | 4,07E-01  | 3,662184281  | 1,78E+01 | 2,42E-05 | 7,32E-04 | Epcam         | 1,33 | Yes |
| ENSMUSG00000045404 | 1,68E-01  | 5,246306471  | 5,48E+00 | 1,92E-02 | 1,47E-01 | Kcnk13        | 1,12 | No  |
| ENSMUSG00000045409 | 3,70E-02  | 4,702755309  | 2,31E-01 | 6,31E-01 | 8,63E-01 | Trim39        | 1,03 | No  |
| ENSMUSG00000045410 | 2,69E-01  | 3,60397308   | 7,90E+00 | 4,93E-03 | 5,54E-02 | Akr1e1        | 1,21 | No  |
| ENSMUSG00000045411 | 1,22E-01  | 7,83070347   | 4,29E+00 | 3,83E-02 | 2,32E-01 | 2410002F23Rik | 1,09 | No  |
| ENSMUSG00000045414 | 3,66E-01  | 3,806037836  | 1,56E+01 | 7,62E-05 | 1,93E-03 | 1190002N15Rik | 1,29 | Yes |
| ENSMUSG00000045435 | 6,96E-02  | 3,49992022   | 4,84E-01 | 4,87E-01 | 7,74E-01 | Tmem60        | 1,05 | No  |
| ENSMUSG00000045438 | 7,04E-02  | 4,223088001  | 6,90E-01 | 4,06E-01 | 7,02E-01 | Cox19         | 1,05 | No  |
| ENSMUSG00000045440 | -1,14E-02 | -3,033635021 | 1,50E-05 | 9,97E-01 | 1,00E+00 | Insm2         | 0,99 | No  |
| ENSMUSG00000045441 | 6,37E-01  | 1,229229776  | 1,05E+01 | 1,20E-03 | 1,88E-02 | Gprin3        | 1,56 | Yes |
| ENSMUSG00000045455 | 1,56E-01  | 3,874629218  | 2,89E+00 | 8,93E-02 | 3,79E-01 | Gm9797        | 1,11 | No  |
| ENSMUSG00000045464 | 4,23E-02  | 2,050756594  | 8,18E-02 | 7,75E-01 | 9,45E-01 | 2810002D19Rik | 1,03 | No  |
| ENSMUSG00000045466 | 2,80E-02  | 3,119314338  | 6,62E-02 | 7,97E-01 | 9,58E-01 | Zfp956        | 1,02 | No  |
| ENSMUSG00000045467 | -2,45E-01 | -2,107680555 | 1,18E-01 | 7,31E-01 | 9,22E-01 | Ttll13        | 0,84 | No  |
| ENSMUSG00000045471 | -2,71E+00 | -3,033620915 | 2,92E+00 | 8,75E-02 | 3,78E-01 | Hcrt          | 0,15 | No  |
| ENSMUSG00000045479 | 1,81E+00  | -3,10765737  | 1,28E+00 | 2,58E-01 | 5,50E-01 | Olfr459       | 3,49 | No  |
| ENSMUSG00000045482 | 3,24E-02  | 7,442246679  | 2,97E-01 | 5,86E-01 | 8,39E-01 | Trrap         | 1,02 | No  |
| ENSMUSG00000045498 | -1,94E+00 | -3,107619243 | 1,50E+00 | 2,21E-01 | 5,50E-01 | Pcdhb3        | 0,26 | No  |
| ENSMUSG00000045502 | 2,27E-01  | 6,745763095  | 1,35E+01 | 2,37E-04 | 5,00E-03 | Hcar2         | 1,17 | Yes |
| ENSMUSG00000045503 | 2,48E-02  | 5,064252188  | 1,14E-01 | 7,35E-01 | 9,24E-01 | Sys1          | 1,02 | No  |
| ENSMUSG00000045506 | -1,89E+00 | -3,1076441   | 1,42E+00 | 2,33E-01 | 5,50E-01 | A930002H24Rik | 0,27 | No  |

|                    |           |              |           |          |          |          |      |     |
|--------------------|-----------|--------------|-----------|----------|----------|----------|------|-----|
| ENSMUSG00000045509 | 4,99E-01  | 0,867729776  | 5,23E+00  | 2,21E-02 | 1,61E-01 | Gpr150   | 1,41 | No  |
| ENSMUSG00000045514 | 7,18E-01  | -1,627580449 | 1,39E+00  | 2,38E-01 | 5,50E-01 | Olfr460  | 1,65 | No  |
| ENSMUSG00000045519 | 1,79E-01  | 2,347916605  | 1,75E+00  | 1,86E-01 | 5,50E-01 | Zfp560   | 1,13 | No  |
| ENSMUSG00000045521 | -9,37E-01 | -2,548260194 | 7,69E-01  | 3,81E-01 | 6,82E-01 | Tssk2    | 0,52 | No  |
| ENSMUSG00000045532 | -1,86E+00 | -3,033612668 | 1,39E+00  | 2,38E-01 | 5,50E-01 | C1ql1    | 0,28 | No  |
| ENSMUSG00000045538 | 8,47E-02  | 4,485018353  | 1,09E+00  | 2,96E-01 | 5,92E-01 | Ddx28    | 1,06 | No  |
| ENSMUSG00000045551 | -3,78E-02 | 2,678046243  | 9,05E-02  | 7,63E-01 | 9,39E-01 | Fpr1     | 0,97 | No  |
| ENSMUSG00000045555 | -7,01E-02 | -1,600713609 | 1,61E-02  | 8,99E-01 | 1,00E+00 | Mettl24  | 0,95 | No  |
| ENSMUSG00000045573 | -8,94E-01 | 1,337605135  | 2,44E+01  | 7,68E-07 | 3,53E-05 | Penk     | 0,54 | Yes |
| ENSMUSG00000045576 | 3,58E-02  | 4,103265638  | 1,71E-01  | 6,79E-01 | 8,93E-01 | St7l     | 1,03 | No  |
| ENSMUSG00000045589 | 1,82E+00  | -3,033661385 | 1,31E+00  | 2,52E-01 | 5,50E-01 | Frrs1l   | 3,54 | No  |
| ENSMUSG00000045591 | 2,65E+00  | -3,033655087 | 2,73E+00  | 9,86E-02 | 3,91E-01 | Olig3    | 6,30 | No  |
| ENSMUSG00000045594 | 5,53E-02  | 6,168547245  | 7,36E-01  | 3,91E-01 | 6,91E-01 | Glb1     | 1,04 | No  |
| ENSMUSG00000045598 | -8,55E-02 | 3,020653482  | 6,05E-01  | 4,37E-01 | 7,29E-01 | Zfp553   | 0,94 | No  |
| ENSMUSG00000045609 | 1,84E-01  | -0,669151041 | 2,31E-01  | 6,31E-01 | 8,63E-01 | Gm5455   | 1,14 | No  |
| ENSMUSG00000045613 | 2,13E-01  | -1,136415809 | 1,69E-01  | 6,81E-01 | 8,94E-01 | Chrm2    | 1,16 | No  |
| ENSMUSG00000045624 | 2,11E-01  | 4,179106385  | 6,04E+00  | 1,40E-02 | 1,20E-01 | Esf1     | 1,16 | No  |
| ENSMUSG00000045625 | 4,16E-01  | 2,358418272  | 9,18E+00  | 2,44E-03 | 3,28E-02 | Pigz     | 1,33 | Yes |
| ENSMUSG00000045629 | 1,26E+00  | -2,832033055 | 9,81E-01  | 3,22E-01 | 6,22E-01 | Sh3tc2   | 2,39 | No  |
| ENSMUSG00000045631 | 1,85E+00  | -3,107657832 | 1,35E+00  | 2,46E-01 | 5,50E-01 | Tmprss12 | 3,61 | No  |
| ENSMUSG00000045636 | -1,28E-01 | 3,346255201  | 1,50E+00  | 2,20E-01 | 5,50E-01 | Mtus1    | 0,92 | No  |
| ENSMUSG00000045639 | 4,39E-04  | 3,5930715    | 2,09E-05  | 9,96E-01 | 1,00E+00 | Zfp629   | 1,00 | No  |
| ENSMUSG00000045657 | 9,01E-03  | -3,107646452 | -5,16E-10 | 1,00E+00 | 1,00E+00 | Pcdhb10  | 1,01 | No  |
| ENSMUSG00000045658 | 2,63E-01  | 6,416983397  | 1,72E+01  | 3,36E-05 | 9,67E-04 | Pid1     | 1,20 | Yes |
| ENSMUSG00000045659 | -5,66E-01 | -0,195481171 | 3,08E+00  | 7,93E-02 | 3,60E-01 | Plekha7  | 0,68 | No  |
| ENSMUSG00000045662 | 8,50E-02  | -1,165742302 | 3,54E-02  | 8,51E-01 | 9,90E-01 | Henmt1   | 1,06 | No  |
| ENSMUSG00000045664 | -2,87E-01 | 5,099380168  | 1,56E+01  | 7,92E-05 | 2,00E-03 | Cdc42ep2 | 0,82 | Yes |
| ENSMUSG00000045665 | 1,66E-01  | 6,143132209  | 6,62E+00  | 1,01E-02 | 9,39E-02 | Mfsd5    | 1,12 | No  |
| ENSMUSG00000045667 | 8,71E-01  | -2,355645367 | 1,17E+00  | 2,80E-01 | 5,77E-01 | Smtnl2   | 1,83 | No  |
| ENSMUSG00000045671 | -1,08E-01 | 4,993850983  | 2,12E+00  | 1,45E-01 | 4,82E-01 | Spred2   | 0,93 | No  |
| ENSMUSG00000045672 | -5,25E-01 | 3,785017316  | 3,31E+01  | 8,56E-09 | 6,01E-07 | Col27a1  | 0,69 | Yes |
| ENSMUSG00000045679 | 5,32E-02  | 6,996111164  | 7,68E-01  | 3,81E-01 | 6,82E-01 | Pqlc3    | 1,04 | No  |

|                    |           |              |          |          |          |               |      |     |
|--------------------|-----------|--------------|----------|----------|----------|---------------|------|-----|
| ENSMUSG00000045690 | -6,97E-02 | 8,826458582  | 1,49E+00 | 2,22E-01 | 5,50E-01 | Wdr89         | 0,95 | No  |
| ENSMUSG00000045691 | -3,89E-02 | 4,197244803  | 2,12E-01 | 6,45E-01 | 8,73E-01 | Thtpa         | 0,97 | No  |
| ENSMUSG00000045699 | -1,36E+00 | -2,226282811 | 2,55E+00 | 1,10E-01 | 4,06E-01 | Gm21411       | 0,39 | No  |
| ENSMUSG00000045709 | 4,22E-01  | -2,033661588 | 3,87E-01 | 5,34E-01 | 8,07E-01 | Smkr-ps       | 1,34 | No  |
| ENSMUSG00000045725 | 2,28E-01  | 4,453694103  | 7,80E+00 | 5,22E-03 | 5,77E-02 | Prr15         | 1,17 | No  |
| ENSMUSG00000045730 | 4,71E-01  | 4,51223527   | 3,49E+01 | 3,43E-09 | 2,59E-07 | Adrb2         | 1,39 | Yes |
| ENSMUSG00000045744 | 1,65E-01  | 2,528295082  | 1,70E+00 | 1,92E-01 | 5,50E-01 | Bricd5        | 1,12 | No  |
| ENSMUSG00000045746 | -4,02E-02 | -2,711703535 | 1,12E-03 | 9,73E-01 | 1,00E+00 | B230317F23Rik | 0,97 | No  |
| ENSMUSG00000045751 | 2,19E-01  | 4,732254383  | 7,96E+00 | 4,77E-03 | 5,40E-02 | Mms22l        | 1,16 | No  |
| ENSMUSG00000045752 | 1,17E-01  | 4,347551785  | 1,95E+00 | 1,63E-01 | 5,13E-01 | Tssc4         | 1,08 | No  |
| ENSMUSG00000045757 | 2,37E-01  | 3,095373908  | 4,64E+00 | 3,13E-02 | 2,05E-01 | Zfp764        | 1,18 | No  |
| ENSMUSG00000045761 | 1,83E-01  | -2,355595008 | 4,99E-02 | 8,23E-01 | 9,73E-01 | Togaram2      | 1,13 | No  |
| ENSMUSG00000045763 | -3,56E-01 | 8,17043497   | 3,77E+01 | 8,13E-10 | 6,77E-08 | Basp1         | 0,78 | Yes |
| ENSMUSG00000045767 | 5,03E-02  | 6,40604478   | 6,36E-01 | 4,25E-01 | 7,19E-01 | B230219D22Rik | 1,04 | No  |
| ENSMUSG00000045775 | -5,27E-01 | -1,051713458 | 1,44E+00 | 2,30E-01 | 5,50E-01 | Slc16a5       | 0,69 | No  |
| ENSMUSG00000045777 | 1,89E-01  | -0,185625556 | 3,46E-01 | 5,56E-01 | 8,21E-01 | lfitm10       | 1,14 | No  |
| ENSMUSG00000045780 | 4,53E-01  | -2,711695922 | 1,60E-01 | 6,89E-01 | 8,99E-01 | Olfir624      | 1,37 | No  |
| ENSMUSG00000045790 | -8,92E-01 | -1,424645971 | 2,69E+00 | 1,01E-01 | 3,93E-01 | Ccdc149       | 0,54 | No  |
| ENSMUSG00000045794 | -1,90E+00 | -3,033647263 | 1,44E+00 | 2,30E-01 | 5,50E-01 | Lkaaeear1     | 0,27 | No  |
| ENSMUSG00000045795 | -1,31E-01 | 4,092928934  | 2,30E+00 | 1,30E-01 | 4,52E-01 | Whamm         | 0,91 | No  |
| ENSMUSG00000045799 | -2,21E-01 | 7,368204579  | 1,37E+01 | 2,20E-04 | 4,71E-03 | Gm9800        | 0,86 | Yes |
| ENSMUSG00000045812 | 7,31E-01  | -2,963279337 | 2,91E-01 | 5,90E-01 | 8,41E-01 | Olfir984      | 1,66 | No  |
| ENSMUSG00000045817 | 4,81E-01  | 8,692474002  | 7,02E+01 | 5,34E-17 | 9,76E-15 | Zfp36l2       | 1,40 | Yes |
| ENSMUSG00000045822 | 1,77E-01  | 1,547829867  | 1,11E+00 | 2,91E-01 | 5,87E-01 | Zswim3        | 1,13 | No  |
| ENSMUSG00000045826 | -1,33E-01 | 0,502474546  | 3,02E-01 | 5,83E-01 | 8,38E-01 | Ptprcap       | 0,91 | No  |
| ENSMUSG00000045827 | -8,52E-01 | 5,889004597  | 1,67E+02 | 3,36E-38 | 3,59E-35 | Serpinb9      | 0,55 | Yes |
| ENSMUSG00000045838 | -5,63E-01 | -0,997833867 | 1,58E+00 | 2,09E-01 | 5,50E-01 | A430105I19Rik | 0,68 | No  |
| ENSMUSG00000045842 | -7,68E-01 | -1,015837157 | 3,29E+00 | 6,97E-02 | 3,33E-01 | Tgif2-ps2     | 0,59 | No  |
| ENSMUSG00000045854 | 7,34E-02  | 2,608291914  | 3,38E-01 | 5,61E-01 | 8,24E-01 | Lyrm2         | 1,05 | No  |
| ENSMUSG00000045867 | -1,93E-01 | 3,580006214  | 3,98E+00 | 4,59E-02 | 2,56E-01 | Cradd         | 0,87 | No  |
| ENSMUSG00000045868 | -1,15E-01 | 7,731988783  | 3,85E+00 | 4,98E-02 | 2,70E-01 | Gvin1         | 0,92 | No  |
| ENSMUSG00000045871 | -8,31E-01 | -2,831987771 | 3,79E-01 | 5,38E-01 | 8,09E-01 | Slitrk6       | 0,56 | No  |



|                    |           |              |           |          |          |               |      |     |
|--------------------|-----------|--------------|-----------|----------|----------|---------------|------|-----|
| ENSMUSG00000045886 | -5,17E-02 | 3,437374838  | 2,65E-01  | 6,06E-01 | 8,50E-01 | Gm9803        | 0,96 | No  |
| ENSMUSG00000045896 | 5,75E-02  | 5,127587053  | 6,32E-01  | 4,27E-01 | 7,21E-01 | Paip2b        | 1,04 | No  |
| ENSMUSG00000045903 | 7,33E-02  | 0,337689576  | 8,59E-02  | 7,69E-01 | 9,42E-01 | Npas4         | 1,05 | No  |
| ENSMUSG00000045912 | -4,13E-02 | -3,033659495 | 7,08E-04  | 9,79E-01 | 1,00E+00 | C2cd4c        | 0,97 | No  |
| ENSMUSG00000045915 | -3,84E+00 | -2,832005976 | 7,04E+00  | 7,96E-03 | 7,87E-02 | Ccdc42        | 0,07 | No  |
| ENSMUSG00000045917 | 3,10E-02  | 6,810783512  | 2,57E-01  | 6,12E-01 | 8,52E-01 | Tmem268       | 1,02 | No  |
| ENSMUSG00000045929 | -1,88E+00 | -3,033633562 | 1,42E+00  | 2,34E-01 | 5,50E-01 | Gm20715       | 0,27 | No  |
| ENSMUSG00000045932 | -3,84E-01 | 3,439366439  | 1,49E+01  | 1,13E-04 | 2,68E-03 | lfit2         | 0,77 | Yes |
| ENSMUSG00000045934 | -8,38E-02 | -0,074814653 | 7,89E-02  | 7,79E-01 | 9,47E-01 | Mtmr11        | 0,94 | No  |
| ENSMUSG00000045942 | 2,34E-02  | -1,413060095 | 2,18E-03  | 9,63E-01 | 1,00E+00 | BC049762      | 1,02 | No  |
| ENSMUSG00000045948 | 8,89E-02  | 4,152461995  | 1,06E+00  | 3,04E-01 | 6,01E-01 | Mrps12        | 1,06 | No  |
| ENSMUSG00000045952 | -4,15E-02 | 4,181304666  | 2,32E-01  | 6,30E-01 | 8,62E-01 | Gm5548        | 0,97 | No  |
| ENSMUSG00000045954 | -1,35E+00 | -2,832003544 | 1,14E+00  | 2,86E-01 | 5,82E-01 | Cavin2        | 0,39 | No  |
| ENSMUSG00000045962 | -1,03E-01 | 8,932937434  | 3,26E+00  | 7,11E-02 | 3,38E-01 | Wnk1          | 0,93 | No  |
| ENSMUSG00000045968 | -4,25E-01 | 1,036222084  | 4,35E+00  | 3,70E-02 | 2,29E-01 | Teddm2        | 0,74 | No  |
| ENSMUSG00000045969 | -5,26E-02 | 5,317679501  | 5,52E-01  | 4,57E-01 | 7,46E-01 | Ing1          | 0,96 | No  |
| ENSMUSG00000045973 | -2,66E-02 | 6,483640217  | 1,81E-01  | 6,70E-01 | 8,88E-01 | Slc25a51      | 0,98 | No  |
| ENSMUSG00000045975 | 3,41E-01  | 3,727021721  | 1,29E+01  | 3,31E-04 | 6,56E-03 | C2cd2         | 1,27 | Yes |
| ENSMUSG00000045980 | 2,21E-01  | 6,335689269  | 1,20E+01  | 5,43E-04 | 9,82E-03 | Tmem104       | 1,17 | Yes |
| ENSMUSG00000045983 | 8,49E-02  | 8,72191594   | 2,20E+00  | 1,38E-01 | 4,68E-01 | Eif4g1        | 1,06 | No  |
| ENSMUSG00000045991 | 1,17E-01  | -0,366968731 | 1,22E-01  | 7,27E-01 | 9,19E-01 | Onecut2       | 1,08 | No  |
| ENSMUSG00000045994 | -1,23E+00 | -3,146117124 | 7,12E-01  | 3,99E-01 | 6,98E-01 | B3gat1        | 0,42 | No  |
| ENSMUSG00000045996 | -3,03E-02 | 0,943683524  | 2,02E-02  | 8,87E-01 | 1,00E+00 | Polr2k        | 0,98 | No  |
| ENSMUSG00000046005 | -5,88E-02 | -3,033616507 | 1,62E-03  | 9,68E-01 | 1,00E+00 | D830044D21Rik | 0,96 | No  |
| ENSMUSG00000046006 | 3,27E-02  | 4,791287278  | 1,82E-01  | 6,70E-01 | 8,88E-01 | Gapt          | 1,02 | No  |
| ENSMUSG00000046010 | 1,07E-01  | 3,939963158  | 1,42E+00  | 2,34E-01 | 5,50E-01 | Zfp830        | 1,08 | No  |
| ENSMUSG00000046016 | -3,83E-02 | -3,107651936 | -7,91E-11 | 1,00E+00 | 1,00E+00 | Olf1364       | 0,97 | No  |
| ENSMUSG00000046020 | -5,68E-02 | 5,900919208  | 7,39E-01  | 3,90E-01 | 6,90E-01 | Pofut1        | 0,96 | No  |
| ENSMUSG00000046027 | 2,31E-01  | 5,1469534    | 1,02E+01  | 1,43E-03 | 2,14E-02 | Stard5        | 1,17 | Yes |
| ENSMUSG00000046031 | -6,17E-02 | 0,551404481  | 6,55E-02  | 7,98E-01 | 9,59E-01 | Fam26f        | 0,96 | No  |
| ENSMUSG00000046034 | -6,55E-02 | 5,241679194  | 8,37E-01  | 3,60E-01 | 6,61E-01 | Otulin        | 0,96 | No  |
| ENSMUSG00000046056 | 3,70E-02  | 0,298915577  | 1,97E-02  | 8,88E-01 | 1,00E+00 | Sbsn          | 1,03 | No  |

|                    |           |              |           |          |          |               |      |     |
|--------------------|-----------|--------------|-----------|----------|----------|---------------|------|-----|
| ENSMUSG00000046057 | 2,19E-01  | 4,560888088  | 7,43E+00  | 6,40E-03 | 6,73E-02 | Gm15428       | 1,16 | No  |
| ENSMUSG00000046058 | -2,58E-01 | 2,783540447  | 4,54E+00  | 3,31E-02 | 2,13E-01 | Eid2          | 0,84 | No  |
| ENSMUSG00000046062 | 1,58E-01  | 7,626776849  | 7,19E+00  | 7,34E-03 | 7,43E-02 | Ppp1r15b      | 1,12 | No  |
| ENSMUSG00000046070 | 2,87E-01  | -2,448727156 | 8,39E-02  | 7,72E-01 | 9,43E-01 | Igfals        | 1,22 | No  |
| ENSMUSG00000046079 | 2,46E-02  | 7,054607834  | 1,64E-01  | 6,85E-01 | 8,97E-01 | Lrrc8d        | 1,02 | No  |
| ENSMUSG00000046080 | 2,04E-01  | 4,336120817  | 5,96E+00  | 1,46E-02 | 1,23E-01 | Clec9a        | 1,15 | No  |
| ENSMUSG00000046082 | 1,85E+00  | -3,107657832 | 1,35E+00  | 2,46E-01 | 5,50E-01 | Tmem174       | 3,61 | No  |
| ENSMUSG00000046085 | -2,53E-01 | 1,664432073  | 2,37E+00  | 1,24E-01 | 4,40E-01 | 4931422A03Rik | 0,84 | No  |
| ENSMUSG00000046093 | -1,13E+00 | -1,497634164 | 4,62E+00  | 3,16E-02 | 2,06E-01 | Hpcal4        | 0,46 | No  |
| ENSMUSG00000046096 | 6,61E-02  | 3,789417224  | 5,13E-01  | 4,74E-01 | 7,62E-01 | BC030336      | 1,05 | No  |
| ENSMUSG00000046101 | -4,55E-01 | -0,305821693 | 1,88E+00  | 1,70E-01 | 5,26E-01 | Mcmdc2        | 0,73 | No  |
| ENSMUSG00000046108 | -2,97E-01 | -0,360936774 | 7,31E-01  | 3,92E-01 | 6,93E-01 | Il17c         | 0,81 | No  |
| ENSMUSG00000046110 | -5,87E-02 | 4,839968387  | 6,06E-01  | 4,36E-01 | 7,29E-01 | Serinc4       | 0,96 | No  |
| ENSMUSG00000046111 | 9,78E-02  | 5,325911428  | 1,91E+00  | 1,66E-01 | 5,19E-01 | Cep295        | 1,07 | No  |
| ENSMUSG00000046138 | 4,30E-02  | 5,109316546  | 3,48E-01  | 5,55E-01 | 8,20E-01 | 9930021J03Rik | 1,03 | No  |
| ENSMUSG00000046139 | 6,07E-02  | 6,028584033  | 8,65E-01  | 3,52E-01 | 6,53E-01 | Patl1         | 1,04 | No  |
| ENSMUSG00000046145 | 1,28E-01  | 2,00311862   | 7,02E-01  | 4,02E-01 | 7,00E-01 | 1700018M17Rik | 1,09 | No  |
| ENSMUSG00000046152 | 2,55E-01  | 0,609901752  | 1,11E+00  | 2,92E-01 | 5,88E-01 | Fut10         | 1,19 | No  |
| ENSMUSG00000046157 | 1,65E-01  | 6,014398429  | 6,43E+00  | 1,12E-02 | 1,02E-01 | Tmem229b      | 1,12 | No  |
| ENSMUSG00000046159 | -2,58E-02 | -0,216014988 | 5,95E-03  | 9,39E-01 | 1,00E+00 | Chrm3         | 0,98 | No  |
| ENSMUSG00000046160 | -3,83E-02 | -3,107651936 | -7,91E-11 | 1,00E+00 | 1,00E+00 | Olig1         | 0,97 | No  |
| ENSMUSG00000046167 | -5,25E-02 | -3,033661434 | 4,08E-11  | 1,00E+00 | 1,00E+00 | Gldn          | 0,96 | No  |
| ENSMUSG00000046168 | 6,62E-01  | -1,159369265 | 2,00E+00  | 1,57E-01 | 5,03E-01 | Kcnrg         | 1,58 | No  |
| ENSMUSG00000046169 | -5,29E-02 | 0,997647691  | 6,22E-02  | 8,03E-01 | 9,62E-01 | Adamts6       | 0,96 | No  |
| ENSMUSG00000046179 | 2,55E-01  | 5,665612707  | 1,41E+01  | 1,72E-04 | 3,82E-03 | E2f8          | 1,19 | Yes |
| ENSMUSG00000046182 | -3,83E-02 | -3,107651936 | -7,91E-11 | 1,00E+00 | 1,00E+00 | Gsg1l         | 0,97 | No  |
| ENSMUSG00000046185 | 5,57E-02  | 3,983351436  | 3,91E-01  | 5,32E-01 | 8,06E-01 | Zfp84         | 1,04 | No  |
| ENSMUSG00000046186 | 2,23E-01  | 2,537757641  | 3,01E+00  | 8,30E-02 | 3,70E-01 | Cd109         | 1,17 | No  |
| ENSMUSG00000046201 | 2,82E-02  | 5,910195915  | 1,82E-01  | 6,70E-01 | 8,88E-01 | Scaf8         | 1,02 | No  |
| ENSMUSG00000046204 | -1,87E+00 | -3,107637761 | 1,39E+00  | 2,38E-01 | 5,50E-01 | Pnma2         | 0,27 | No  |
| ENSMUSG00000046207 | -1,49E-02 | 6,552443892  | 5,75E-02  | 8,11E-01 | 9,66E-01 | Pik3r6        | 0,99 | No  |
| ENSMUSG00000046210 | -1,89E+00 | -3,1076441   | 1,42E+00  | 2,33E-01 | 5,50E-01 | Olfir735      | 0,27 | No  |

|                    |           |              |           |          |          |          |      |     |
|--------------------|-----------|--------------|-----------|----------|----------|----------|------|-----|
| ENSMUSG00000046215 | 1,81E+00  | -3,10765737  | 1,28E+00  | 2,58E-01 | 5,50E-01 | Rprml    | 3,49 | No  |
| ENSMUSG00000046223 | 1,52E-01  | 9,033063281  | 7,09E+00  | 7,73E-03 | 7,70E-02 | Plaur    | 1,11 | No  |
| ENSMUSG00000046229 | 1,92E-01  | 5,515765414  | 7,73E+00  | 5,43E-03 | 5,94E-02 | Scand1   | 1,14 | No  |
| ENSMUSG00000046230 | 4,85E-02  | 5,270840704  | 4,63E-01  | 4,96E-01 | 7,81E-01 | Vps13a   | 1,03 | No  |
| ENSMUSG00000046240 | -5,18E-02 | -2,711720429 | 1,84E-03  | 9,66E-01 | 1,00E+00 | Hepacam  | 0,96 | No  |
| ENSMUSG00000046242 | -2,64E-01 | -0,863765099 | 3,97E-01  | 5,29E-01 | 8,04E-01 | Nme9     | 0,83 | No  |
| ENSMUSG00000046245 | 1,46E-02  | 7,995442204  | 6,26E-02  | 8,02E-01 | 9,62E-01 | Pilra    | 1,01 | No  |
| ENSMUSG00000046248 | 1,85E+00  | -3,107657832 | 1,35E+00  | 2,46E-01 | 5,50E-01 | Krtap5-3 | 3,61 | No  |
| ENSMUSG00000046272 | 1,11E+00  | -2,448678118 | 1,18E+00  | 2,77E-01 | 5,74E-01 | Olfr1444 | 2,17 | No  |
| ENSMUSG00000046275 | -5,94E-01 | -2,31106433  | 4,81E-01  | 4,88E-01 | 7,75E-01 | Tusc5    | 0,66 | No  |
| ENSMUSG00000046280 | -1,53E+00 | -1,831885481 | 3,39E+00  | 6,55E-02 | 3,21E-01 | She      | 0,35 | No  |
| ENSMUSG00000046282 | -1,87E+00 | -3,107637761 | 1,39E+00  | 2,38E-01 | 5,50E-01 | Adam20   | 0,27 | No  |
| ENSMUSG00000046295 | 1,80E-01  | 3,76382218   | 3,77E+00  | 5,21E-02 | 2,78E-01 | Ankle1   | 1,13 | No  |
| ENSMUSG00000046311 | -1,58E-01 | 5,714969646  | 5,61E+00  | 1,78E-02 | 1,40E-01 | Zfp62    | 0,90 | No  |
| ENSMUSG00000046312 | 3,42E-01  | 1,240461103  | 3,05E+00  | 8,06E-02 | 3,64E-01 | AI464131 | 1,27 | No  |
| ENSMUSG00000046314 | -2,55E-01 | 4,01418414   | 8,47E+00  | 3,62E-03 | 4,40E-02 | Stxbp6   | 0,84 | Yes |
| ENSMUSG00000046318 | 2,39E-01  | 3,53826983   | 5,86E+00  | 1,55E-02 | 1,29E-01 | Ccbe1    | 1,18 | No  |
| ENSMUSG00000046321 | 1,85E+00  | -3,107657832 | 1,35E+00  | 2,46E-01 | 5,50E-01 | Hs3st2   | 3,61 | No  |
| ENSMUSG00000046323 | -1,80E+00 | -2,268162877 | 5,10E+00  | 2,40E-02 | 1,70E-01 | Dppa3    | 0,29 | No  |
| ENSMUSG00000046324 | -6,66E-02 | 5,118589864  | 8,39E-01  | 3,60E-01 | 6,61E-01 | Ermp1    | 0,95 | No  |
| ENSMUSG00000046329 | 1,57E-01  | 2,242447785  | 1,23E+00  | 2,68E-01 | 5,65E-01 | Slc25a23 | 1,12 | No  |
| ENSMUSG00000046330 | -5,17E-01 | 3,294784812  | 2,40E+01  | 9,71E-07 | 4,32E-05 | Rpl37a   | 0,70 | Yes |
| ENSMUSG00000046334 | -3,01E-01 | 2,175953309  | 4,32E+00  | 3,77E-02 | 2,31E-01 | Gm6195   | 0,81 | No  |
| ENSMUSG00000046337 | 2,14E-01  | -2,57423717  | 3,33E-02  | 8,55E-01 | 9,92E-01 | Fam178b  | 1,16 | No  |
| ENSMUSG00000046338 | 9,82E-01  | -0,160885526 | 8,62E+00  | 3,33E-03 | 4,14E-02 | Gpat2    | 1,98 | Yes |
| ENSMUSG00000046341 | 1,17E-01  | 6,507297829  | 3,46E+00  | 6,28E-02 | 3,13E-01 | Gm11223  | 1,08 | No  |
| ENSMUSG00000046345 | -1,36E+00 | -2,896135617 | 1,16E+00  | 2,82E-01 | 5,78E-01 | Smco1    | 0,39 | No  |
| ENSMUSG00000046351 | 1,46E-01  | 3,591046256  | 2,33E+00  | 1,27E-01 | 4,47E-01 | Zfp322a  | 1,11 | No  |
| ENSMUSG00000046352 | 2,20E-01  | -2,401359131 | 6,09E-02  | 8,05E-01 | 9,63E-01 | Gjb2     | 1,16 | No  |
| ENSMUSG00000046364 | -1,30E-01 | 6,043423607  | 3,99E+00  | 4,57E-02 | 2,55E-01 | Rpl27a   | 0,91 | No  |
| ENSMUSG00000046367 | -3,83E-02 | -3,107651936 | -7,91E-11 | 1,00E+00 | 1,00E+00 | Mgat4e   | 0,97 | No  |
| ENSMUSG00000046372 | -2,93E-01 | 3,334595805  | 8,20E+00  | 4,18E-03 | 4,89E-02 | Gm5590   | 0,82 | Yes |

|                    |           |              |           |          |          |               |      |     |
|--------------------|-----------|--------------|-----------|----------|----------|---------------|------|-----|
| ENSMUSG00000046378 | 2,06E-02  | -1,785565946 | 9,60E-04  | 9,75E-01 | 1,00E+00 | Asphd1        | 1,01 | No  |
| ENSMUSG00000046380 | 2,14E-02  | 1,320183709  | 1,42E-02  | 9,05E-01 | 1,00E+00 | Jrk           | 1,01 | No  |
| ENSMUSG00000046387 | -2,64E+00 | -2,963219259 | 2,78E+00  | 9,55E-02 | 3,86E-01 | Pcdhb17       | 0,16 | No  |
| ENSMUSG00000046388 | -1,20E-01 | -1,355622578 | 5,29E-02  | 8,18E-01 | 9,70E-01 | Gm9806        | 0,92 | No  |
| ENSMUSG00000046402 | -7,53E-01 | -0,252130698 | 5,49E+00  | 1,91E-02 | 1,47E-01 | Rbp1          | 0,59 | No  |
| ENSMUSG00000046404 | 7,85E-02  | 3,420402076  | 5,95E-01  | 4,40E-01 | 7,33E-01 | Yod1          | 1,06 | No  |
| ENSMUSG00000046408 | 4,66E-01  | -0,863746811 | 1,39E+00  | 2,38E-01 | 5,50E-01 | 1700067K01Rik | 1,38 | No  |
| ENSMUSG00000046410 | -1,38E-01 | 7,527971835  | 5,48E+00  | 1,92E-02 | 1,47E-01 | Kcnk6         | 0,91 | No  |
| ENSMUSG00000046411 | -1,87E+00 | -3,033619006 | 1,41E+00  | 2,36E-01 | 5,50E-01 | Rps4l-ps      | 0,27 | No  |
| ENSMUSG00000046415 | 3,68E-01  | -0,740965789 | 8,41E-01  | 3,59E-01 | 6,61E-01 | B430212C06Rik | 1,29 | No  |
| ENSMUSG00000046417 | 1,20E-01  | 3,089808138  | 1,16E+00  | 2,82E-01 | 5,79E-01 | Lrrc75a       | 1,09 | No  |
| ENSMUSG00000046434 | -5,55E-02 | 6,554471581  | 7,89E-01  | 3,74E-01 | 6,75E-01 | Hnrnpa1       | 0,96 | No  |
| ENSMUSG00000046440 | -5,73E-02 | 3,835404914  | 3,92E-01  | 5,31E-01 | 8,05E-01 | Gm5564        | 0,96 | No  |
| ENSMUSG00000046441 | 2,20E-01  | 3,1740878    | 4,16E+00  | 4,13E-02 | 2,41E-01 | Cmtr2         | 1,16 | No  |
| ENSMUSG00000046442 | 2,48E-01  | 0,152153188  | 7,59E-01  | 3,84E-01 | 6,85E-01 | Ppm1e         | 1,19 | No  |
| ENSMUSG00000046447 | -6,27E-01 | -1,896062818 | 9,91E-01  | 3,19E-01 | 6,20E-01 | Camk2n1       | 0,65 | No  |
| ENSMUSG00000046456 | 3,92E-01  | 1,945301567  | 6,84E+00  | 8,90E-03 | 8,57E-02 | Tmem150b      | 1,31 | No  |
| ENSMUSG00000046460 | 4,13E-02  | -1,51004652  | 5,18E-03  | 9,43E-01 | 1,00E+00 | Sh2d7         | 1,03 | No  |
| ENSMUSG00000046463 | -1,87E-01 | 0,563520859  | 5,96E-01  | 4,40E-01 | 7,32E-01 | 5930403N24Rik | 0,88 | No  |
| ENSMUSG00000046470 | 2,45E-01  | -2,497589408 | 7,58E-02  | 7,83E-01 | 9,50E-01 | Sox18         | 1,19 | No  |
| ENSMUSG00000046480 | -1,16E+00 | 3,820506077  | 1,61E+02  | 5,50E-37 | 5,15E-34 | Scn4b         | 0,45 | Yes |
| ENSMUSG00000046486 | 1,81E+00  | -3,10765737  | 1,28E+00  | 2,58E-01 | 5,50E-01 | Olfr231       | 3,49 | No  |
| ENSMUSG00000046487 | -5,58E-01 | -1,929260836 | 6,79E-01  | 4,10E-01 | 7,06E-01 | Mospd4        | 0,68 | No  |
| ENSMUSG00000046490 | -3,83E-02 | -3,107651936 | -7,91E-11 | 1,00E+00 | 1,00E+00 | Rnf222        | 0,97 | No  |
| ENSMUSG00000046491 | -2,63E-02 | -3,033653157 | 2,33E-04  | 9,88E-01 | 1,00E+00 | C1qtnf2       | 0,98 | No  |
| ENSMUSG00000046516 | -2,63E-01 | 4,800562639  | 1,20E+01  | 5,45E-04 | 9,85E-03 | Cox17         | 0,83 | Yes |
| ENSMUSG00000046519 | -4,41E-02 | 6,188642663  | 4,78E-01  | 4,89E-01 | 7,76E-01 | Golph3l       | 0,97 | No  |
| ENSMUSG00000046523 | -2,20E+00 | -2,033604492 | 6,26E+00  | 1,24E-02 | 1,09E-01 | Kctd4         | 0,22 | No  |
| ENSMUSG00000046541 | 2,71E-01  | 2,898369243  | 5,65E+00  | 1,74E-02 | 1,38E-01 | Zfp526        | 1,21 | No  |
| ENSMUSG00000046546 | -3,05E-02 | 6,006119345  | 2,18E-01  | 6,40E-01 | 8,70E-01 | Fam43a        | 0,98 | No  |
| ENSMUSG00000046556 | 5,95E-02  | 4,982623615  | 6,39E-01  | 4,24E-01 | 7,18E-01 | Zfp319        | 1,04 | No  |
| ENSMUSG00000046562 | 1,09E-01  | 6,174032586  | 2,84E+00  | 9,19E-02 | 3,82E-01 | Unc119b       | 1,08 | No  |

|                    |           |              |           |          |          |               |      |    |
|--------------------|-----------|--------------|-----------|----------|----------|---------------|------|----|
| ENSMUSG00000046567 | 6,65E-02  | 2,434781614  | 2,55E-01  | 6,14E-01 | 8,53E-01 | 4930430F08Rik | 1,05 | No |
| ENSMUSG00000046572 | 2,13E-02  | 3,065086407  | 3,74E-02  | 8,47E-01 | 9,87E-01 | Zfp518b       | 1,01 | No |
| ENSMUSG00000046573 | 7,47E-02  | 3,237973342  | 4,95E-01  | 4,82E-01 | 7,69E-01 | Lyrn4         | 1,05 | No |
| ENSMUSG00000046574 | -7,84E-02 | 5,524844682  | 1,31E+00  | 2,52E-01 | 5,50E-01 | Prr12         | 0,95 | No |
| ENSMUSG00000046580 | 9,25E-02  | 2,524052156  | 5,31E-01  | 4,66E-01 | 7,55E-01 | Gm7862        | 1,07 | No |
| ENSMUSG00000046589 | 6,18E-01  | -2,448735094 | 4,26E-01  | 5,14E-01 | 7,96E-01 | Lrrc8e        | 1,53 | No |
| ENSMUSG00000046591 | 2,00E-01  | 4,57886083   | 6,33E+00  | 1,19E-02 | 1,06E-01 | Ticrr         | 1,15 | No |
| ENSMUSG00000046593 | -6,40E-01 | -0,107667786 | 3,69E+00  | 5,48E-02 | 2,87E-01 | Tmem215       | 0,64 | No |
| ENSMUSG00000046598 | 7,97E-02  | 5,881577296  | 1,45E+00  | 2,29E-01 | 5,50E-01 | Bdh1          | 1,06 | No |
| ENSMUSG00000046603 | 1,55E-01  | 2,509666632  | 1,46E+00  | 2,27E-01 | 5,50E-01 | Tcaim         | 1,11 | No |
| ENSMUSG00000046605 | 1,76E-01  | 3,498671922  | 3,16E+00  | 7,55E-02 | 3,50E-01 | B3gntl1       | 1,13 | No |
| ENSMUSG00000046607 | 6,95E-01  | -2,963260828 | 2,60E-01  | 6,10E-01 | 8,51E-01 | Hrk           | 1,62 | No |
| ENSMUSG00000046610 | -8,52E-01 | -1,683072168 | 1,97E+00  | 1,61E-01 | 5,09E-01 | Oacyl         | 0,55 | No |
| ENSMUSG00000046613 | 4,73E-01  | -2,424847269 | 3,04E-01  | 5,82E-01 | 8,38E-01 | Vwa5b2        | 1,39 | No |
| ENSMUSG00000046618 | -3,17E+00 | -2,832010676 | 4,23E+00  | 3,97E-02 | 2,36E-01 | Olfml2a       | 0,11 | No |
| ENSMUSG00000046620 | -2,28E-01 | 0,966369517  | 1,21E+00  | 2,72E-01 | 5,69E-01 | Rps11-ps4     | 0,85 | No |
| ENSMUSG00000046634 | 9,01E-03  | -3,107646452 | -5,16E-10 | 1,00E+00 | 1,00E+00 | Pkd1l1        | 1,01 | No |
| ENSMUSG00000046636 | -3,83E-03 | 5,38905436   | 2,98E-03  | 9,56E-01 | 1,00E+00 | Gm7729        | 1,00 | No |
| ENSMUSG00000046652 | 4,15E-01  | -2,600737388 | 1,35E-01  | 7,14E-01 | 9,12E-01 | Tas2r143      | 1,33 | No |
| ENSMUSG00000046658 | 2,96E-01  | 3,025562059  | 7,14E+00  | 7,54E-03 | 7,58E-02 | Zfp316        | 1,23 | No |
| ENSMUSG00000046667 | -5,66E-03 | 3,086571993  | 2,74E-03  | 9,58E-01 | 1,00E+00 | Rbm12b1       | 1,00 | No |
| ENSMUSG00000046668 | 1,36E-02  | 3,196525699  | 1,64E-02  | 8,98E-01 | 1,00E+00 | Cxxc5         | 1,01 | No |
| ENSMUSG00000046671 | 6,83E-02  | 6,007553196  | 1,08E+00  | 2,98E-01 | 5,94E-01 | Mtfr1l        | 1,05 | No |
| ENSMUSG00000046675 | 5,70E-02  | 4,497427584  | 4,95E-01  | 4,82E-01 | 7,69E-01 | Tmem251       | 1,04 | No |
| ENSMUSG00000046679 | 1,77E-01  | 3,37808083   | 3,02E+00  | 8,22E-02 | 3,68E-01 | C87436        | 1,13 | No |
| ENSMUSG00000046687 | 2,68E-02  | 9,437481224  | 2,25E-01  | 6,36E-01 | 8,67E-01 | Gm5424        | 1,02 | No |
| ENSMUSG00000046688 | -8,09E-02 | 5,180007026  | 1,26E+00  | 2,61E-01 | 5,55E-01 | Tifa          | 0,95 | No |
| ENSMUSG00000046691 | 5,00E-02  | 6,564833671  | 6,44E-01  | 4,22E-01 | 7,18E-01 | Chtf8         | 1,04 | No |
| ENSMUSG00000046694 | 8,11E-01  | -2,655120825 | 5,72E-01  | 4,49E-01 | 7,39E-01 | Fam46b        | 1,75 | No |
| ENSMUSG00000046707 | -4,45E-02 | 5,92758649   | 4,56E-01  | 4,99E-01 | 7,85E-01 | Csnk2a2       | 0,97 | No |
| ENSMUSG00000046709 | 2,39E-01  | -2,497583165 | 7,18E-02  | 7,89E-01 | 9,54E-01 | Mapk10        | 1,18 | No |
| ENSMUSG00000046711 | -1,97E-02 | 7,374552481  | 1,09E-01  | 7,41E-01 | 9,27E-01 | Hmga1         | 0,99 | No |

|                    |           |              |           |          |          |               |      |     |
|--------------------|-----------|--------------|-----------|----------|----------|---------------|------|-----|
| ENSMUSG00000046714 | -1,89E+00 | -3,1076441   | 1,42E+00  | 2,33E-01 | 5,50E-01 | Foxc2         | 0,27 | No  |
| ENSMUSG00000046718 | -4,03E-01 | 6,18066271   | 3,92E+01  | 3,87E-10 | 3,39E-08 | Bst2          | 0,76 | Yes |
| ENSMUSG00000046719 | 3,14E-01  | -1,832153908 | 2,62E-01  | 6,09E-01 | 8,51E-01 | Nxph3         | 1,24 | No  |
| ENSMUSG00000046721 | -1,26E-01 | 8,53827782   | 4,79E+00  | 2,87E-02 | 1,92E-01 | Rpl14-ps1     | 0,92 | No  |
| ENSMUSG00000046722 | -5,21E-02 | 8,101507785  | 8,06E-01  | 3,69E-01 | 6,71E-01 | Cdc42se1      | 0,96 | No  |
| ENSMUSG00000046727 | -4,19E-01 | 1,791989165  | 6,94E+00  | 8,44E-03 | 8,24E-02 | Cystm1        | 0,75 | No  |
| ENSMUSG00000046731 | 2,38E-01  | 3,487960764  | 5,96E+00  | 1,46E-02 | 1,23E-01 | Kctd11        | 1,18 | No  |
| ENSMUSG00000046733 | -6,79E-01 | 1,546018026  | 1,53E+01  | 9,23E-05 | 2,26E-03 | Gprc5a        | 0,62 | Yes |
| ENSMUSG00000046743 | -3,22E-01 | -2,333155942 | 1,30E-01  | 7,18E-01 | 9,15E-01 | Fat4          | 0,80 | No  |
| ENSMUSG00000046747 | 7,64E-02  | 0,697005485  | 1,10E-01  | 7,40E-01 | 9,26E-01 | Gm9812        | 1,05 | No  |
| ENSMUSG00000046748 | 9,01E-03  | -3,107646452 | -5,16E-10 | 1,00E+00 | 1,00E+00 | Tmem45a2      | 1,01 | No  |
| ENSMUSG00000046753 | -3,59E-02 | 3,608351178  | 1,40E-01  | 7,08E-01 | 9,09E-01 | Ccdc66        | 0,98 | No  |
| ENSMUSG00000046756 | -1,22E-01 | 5,471282292  | 3,13E+00  | 7,70E-02 | 3,54E-01 | Mrps7         | 0,92 | No  |
| ENSMUSG00000046761 | 6,46E-02  | 1,713260049  | 1,59E-01  | 6,90E-01 | 8,99E-01 | Fam83h        | 1,05 | No  |
| ENSMUSG00000046768 | -3,77E-01 | 0,71058488   | 2,66E+00  | 1,03E-01 | 3,95E-01 | Rhoj          | 0,77 | No  |
| ENSMUSG00000046782 | -1,89E+00 | -3,1076441   | 1,42E+00  | 2,33E-01 | 5,50E-01 | Ttc6          | 0,27 | No  |
| ENSMUSG00000046785 | -3,26E-02 | 4,758715951  | 1,81E-01  | 6,71E-01 | 8,89E-01 | Epm2aip1      | 0,98 | No  |
| ENSMUSG00000046791 | 3,27E-02  | 3,483340439  | 1,04E-01  | 7,47E-01 | 9,30E-01 | Riox1         | 1,02 | No  |
| ENSMUSG00000046792 | 3,01E-02  | 4,518642689  | 1,44E-01  | 7,04E-01 | 9,06E-01 | Zfp787        | 1,02 | No  |
| ENSMUSG00000046793 | 2,91E-01  | -2,655118016 | 8,60E-02  | 7,69E-01 | 9,42E-01 | Gpr61         | 1,22 | No  |
| ENSMUSG00000046794 | 1,27E-01  | 4,022767023  | 2,05E+00  | 1,53E-01 | 4,95E-01 | Ppp1r3b       | 1,09 | No  |
| ENSMUSG00000046798 | -1,01E-01 | 2,595765227  | 6,37E-01  | 4,25E-01 | 7,19E-01 | Cldn12        | 0,93 | No  |
| ENSMUSG00000046805 | 1,16E-01  | 11,03745125  | 4,31E+00  | 3,80E-02 | 2,31E-01 | Mpeg1         | 1,08 | No  |
| ENSMUSG00000046806 | 2,94E-02  | 3,833009101  | 1,05E-01  | 7,46E-01 | 9,29E-01 | 3110062M04Rik | 1,02 | No  |
| ENSMUSG00000046807 | 4,34E-01  | -2,448684096 | 1,48E-01  | 7,01E-01 | 9,05E-01 | Lrrc75b       | 1,35 | No  |
| ENSMUSG00000046808 | -2,15E-01 | 3,971825096  | 5,81E+00  | 1,59E-02 | 1,31E-01 | Atp10d        | 0,86 | No  |
| ENSMUSG00000046814 | -6,49E-02 | -0,816295308 | 2,55E-02  | 8,73E-01 | 1,00E+00 | Gchfr         | 0,96 | No  |
| ENSMUSG00000046818 | -1,22E-01 | 1,124341391  | 3,87E-01  | 5,34E-01 | 8,07E-01 | Ddit4l        | 0,92 | No  |
| ENSMUSG00000046822 | 8,84E-02  | 4,718765515  | 1,31E+00  | 2,52E-01 | 5,50E-01 | Slc39a3       | 1,06 | No  |
| ENSMUSG00000046826 | 3,02E-01  | 0,337668397  | 1,25E+00  | 2,64E-01 | 5,59E-01 | Fam187b       | 1,23 | No  |
| ENSMUSG00000046834 | -2,31E+00 | -2,35552661  | 7,16E+00  | 7,45E-03 | 7,51E-02 | Krt1          | 0,20 | No  |
| ENSMUSG00000046836 | 7,65E-02  | 6,350540098  | 1,45E+00  | 2,29E-01 | 5,50E-01 | Brox          | 1,05 | No  |

|                    |           |              |          |          |          |               |      |     |
|--------------------|-----------|--------------|----------|----------|----------|---------------|------|-----|
| ENSMUSG00000046841 | 1,11E-01  | 5,034113552  | 2,23E+00 | 1,36E-01 | 4,64E-01 | Ckap4         | 1,08 | No  |
| ENSMUSG00000046844 | -4,38E-01 | 3,329909581  | 1,88E+01 | 1,42E-05 | 4,56E-04 | Vat1l         | 0,74 | Yes |
| ENSMUSG00000046854 | -6,97E-01 | -2,770595499 | 3,23E-01 | 5,70E-01 | 8,31E-01 | Pip5k1l       | 0,62 | No  |
| ENSMUSG00000046856 | -1,87E+00 | -3,107637761 | 1,39E+00 | 2,38E-01 | 5,50E-01 | Gpr1          | 0,27 | No  |
| ENSMUSG00000046861 | 1,55E-01  | 5,767467523  | 5,34E+00 | 2,08E-02 | 1,55E-01 | Hectd3        | 1,11 | No  |
| ENSMUSG00000046862 | -3,33E-02 | 5,196361715  | 2,14E-01 | 6,44E-01 | 8,72E-01 | Pramef8       | 0,98 | No  |
| ENSMUSG00000046865 | 1,94E-01  | 4,183984396  | 5,15E+00 | 2,33E-02 | 1,67E-01 | Fbl           | 1,14 | No  |
| ENSMUSG00000046876 | 1,53E-01  | 5,268601813  | 4,55E+00 | 3,30E-02 | 2,13E-01 | Atxn1         | 1,11 | No  |
| ENSMUSG00000046879 | -6,60E-02 | 5,193489652  | 8,49E-01 | 3,57E-01 | 6,58E-01 | Irgm1         | 0,96 | No  |
| ENSMUSG00000046881 | 1,84E+00  | -3,033649193 | 1,33E+00 | 2,49E-01 | 5,50E-01 | Olfr374       | 3,58 | No  |
| ENSMUSG00000046897 | 3,62E-02  | 5,62056187   | 2,86E-01 | 5,93E-01 | 8,42E-01 | Zfp740        | 1,03 | No  |
| ENSMUSG00000046899 | -1,87E+00 | -3,107637761 | 1,39E+00 | 2,38E-01 | 5,50E-01 | Prl7a2        | 0,27 | No  |
| ENSMUSG00000046908 | 3,12E-01  | 5,806176399  | 2,15E+01 | 3,61E-06 | 1,37E-04 | Ltb4r1        | 1,24 | Yes |
| ENSMUSG00000046909 | 2,80E-02  | 2,281147197  | 4,16E-02 | 8,38E-01 | 9,82E-01 | Tefm          | 1,02 | No  |
| ENSMUSG00000046916 | -1,91E+00 | -2,963268868 | 1,45E+00 | 2,29E-01 | 5,50E-01 | Myct1         | 0,27 | No  |
| ENSMUSG00000046934 | -2,40E-02 | 5,292521835  | 1,14E-01 | 7,36E-01 | 9,24E-01 | Csl           | 0,98 | No  |
| ENSMUSG00000046947 | 8,98E-02  | 3,781453119  | 9,39E-01 | 3,32E-01 | 6,33E-01 | Adck2         | 1,06 | No  |
| ENSMUSG00000046949 | 5,24E-02  | 5,289034818  | 5,45E-01 | 4,60E-01 | 7,49E-01 | Nqo2          | 1,04 | No  |
| ENSMUSG00000046952 | 1,38E-01  | 1,868121884  | 8,33E-01 | 3,61E-01 | 6,63E-01 | Gm5815        | 1,10 | No  |
| ENSMUSG00000046959 | 2,55E-01  | 0,607182401  | 1,15E+00 | 2,84E-01 | 5,81E-01 | Slc26a1       | 1,19 | No  |
| ENSMUSG00000046961 | -8,89E-01 | -2,832016389 | 4,33E-01 | 5,11E-01 | 7,94E-01 | Gpr156        | 0,54 | No  |
| ENSMUSG00000046962 | 3,86E-02  | 5,296601529  | 2,92E-01 | 5,89E-01 | 8,41E-01 | Zbtb21        | 1,03 | No  |
| ENSMUSG00000046971 | -4,89E-01 | 1,957877136  | 1,13E+01 | 7,76E-04 | 1,31E-02 | Pla2g4f       | 0,71 | Yes |
| ENSMUSG00000046975 | -1,87E+00 | -3,107637761 | 1,39E+00 | 2,38E-01 | 5,50E-01 | Olfr1020      | 0,27 | No  |
| ENSMUSG00000046982 | 1,67E-01  | 5,334078581  | 5,51E+00 | 1,89E-02 | 1,46E-01 | Tshz1         | 1,12 | No  |
| ENSMUSG00000046985 | 6,85E-02  | 5,650645169  | 1,01E+00 | 3,16E-01 | 6,16E-01 | Tapt1         | 1,05 | No  |
| ENSMUSG00000046991 | 1,79E+00  | -3,033666867 | 1,28E+00 | 2,58E-01 | 5,50E-01 | Wdr27         | 3,46 | No  |
| ENSMUSG00000046994 | 2,01E-01  | 3,70181115   | 4,54E+00 | 3,31E-02 | 2,13E-01 | Mars2         | 1,15 | No  |
| ENSMUSG00000046997 | 1,79E-01  | 3,833078976  | 3,78E+00 | 5,20E-02 | 2,78E-01 | Spsb4         | 1,13 | No  |
| ENSMUSG00000046999 | -5,49E-01 | -0,141212289 | 3,56E+00 | 5,92E-02 | 3,01E-01 | 1110032F04Rik | 0,68 | No  |
| ENSMUSG00000047003 | 4,04E-02  | 2,738360358  | 1,16E-01 | 7,34E-01 | 9,23E-01 | Zfp41         | 1,03 | No  |
| ENSMUSG00000047013 | 2,64E+00  | -2,896137133 | 2,70E+00 | 1,01E-01 | 3,92E-01 | Fbxo41        | 6,24 | No  |

|                    |           |              |           |          |          |               |      |     |
|--------------------|-----------|--------------|-----------|----------|----------|---------------|------|-----|
| ENSMUSG00000047021 | 1,82E+00  | -3,033661385 | 1,31E+00  | 2,52E-01 | 5,50E-01 | Cfap65        | 3,54 | No  |
| ENSMUSG00000047022 | -1,37E-01 | 0,324100651  | 2,76E-01  | 6,00E-01 | 8,46E-01 | Mipol1        | 0,91 | No  |
| ENSMUSG00000047026 | -1,98E-02 | -3,033655952 | 2,83E-11  | 1,00E+00 | 1,00E+00 | Acsm4         | 0,99 | No  |
| ENSMUSG00000047030 | -7,74E-02 | 5,884602937  | 1,36E+00  | 2,43E-01 | 5,50E-01 | Spata2        | 0,95 | No  |
| ENSMUSG00000047036 | -1,23E-01 | 6,81019408   | 4,00E+00  | 4,55E-02 | 2,54E-01 | Zfp445        | 0,92 | No  |
| ENSMUSG00000047037 | 1,40E-01  | 4,026807216  | 2,50E+00  | 1,14E-01 | 4,16E-01 | Nipa1         | 1,10 | No  |
| ENSMUSG00000047040 | 3,24E-01  | -2,448647108 | 1,07E-01  | 7,44E-01 | 9,28E-01 | Prr15l        | 1,25 | No  |
| ENSMUSG00000047044 | 2,00E-01  | 3,373928637  | 3,83E+00  | 5,03E-02 | 2,72E-01 | D030056L22Rik | 1,15 | No  |
| ENSMUSG00000047048 | -5,78E-02 | -2,896131211 | 2,23E-03  | 9,62E-01 | 1,00E+00 | Olfrc432      | 0,96 | No  |
| ENSMUSG00000047053 | -1,27E+00 | -3,146104694 | 7,49E-01  | 3,87E-01 | 6,87E-01 | Teddm1a       | 0,42 | No  |
| ENSMUSG00000047061 | -1,15E+00 | -2,963255048 | 5,80E-01  | 4,46E-01 | 7,37E-01 | Gm9817        | 0,45 | No  |
| ENSMUSG00000047067 | 1,48E-01  | 2,091222747  | 1,01E+00  | 3,14E-01 | 6,14E-01 | Dusp28        | 1,11 | No  |
| ENSMUSG00000047084 | -9,79E-02 | 3,439655028  | 9,48E-01  | 3,30E-01 | 6,31E-01 | Ngrn          | 0,93 | No  |
| ENSMUSG00000047085 | -1,60E+00 | -1,600630114 | 7,95E+00  | 4,81E-03 | 5,44E-02 | Lrrc4b        | 0,33 | No  |
| ENSMUSG00000047090 | -6,95E-03 | 5,440392853  | 9,82E-03  | 9,21E-01 | 1,00E+00 | Tmem198b      | 1,00 | No  |
| ENSMUSG00000047098 | -3,72E-02 | 5,2171315    | 2,75E-01  | 6,00E-01 | 8,46E-01 | Rnf31         | 0,97 | No  |
| ENSMUSG00000047104 | 1,87E+00  | -3,03364371  | 1,36E+00  | 2,43E-01 | 5,50E-01 | Pbp2          | 3,66 | No  |
| ENSMUSG00000047108 | -1,52E+00 | -2,226207792 | 3,34E+00  | 6,77E-02 | 3,28E-01 | Dnajb7        | 0,35 | No  |
| ENSMUSG00000047115 | 8,17E-02  | 0,948119829  | 1,51E-01  | 6,98E-01 | 9,04E-01 | Fam221a       | 1,06 | No  |
| ENSMUSG00000047117 | -2,31E-01 | -0,66880713  | 3,49E-01  | 5,54E-01 | 8,20E-01 | Ankdd1b       | 0,85 | No  |
| ENSMUSG00000047123 | 2,84E-01  | 5,027776505  | 1,49E+01  | 1,13E-04 | 2,69E-03 | Ticam1        | 1,22 | Yes |
| ENSMUSG00000047126 | 7,23E-02  | 9,568921943  | 1,64E+00  | 2,00E-01 | 5,50E-01 | Cltc          | 1,05 | No  |
| ENSMUSG00000047139 | 8,57E-02  | 8,778767272  | 2,25E+00  | 1,34E-01 | 4,60E-01 | Cd24a         | 1,06 | No  |
| ENSMUSG00000047141 | -4,26E-02 | 4,876005051  | 3,21E-01  | 5,71E-01 | 8,31E-01 | Zfp654        | 0,97 | No  |
| ENSMUSG00000047143 | -5,01E-01 | 3,842638647  | 3,11E+01  | 2,47E-08 | 1,58E-06 | Dmrta2        | 0,71 | Yes |
| ENSMUSG00000047146 | 5,28E-01  | -0,879928814 | 1,59E+00  | 2,08E-01 | 5,50E-01 | Tet1          | 1,44 | No  |
| ENSMUSG00000047150 | -7,91E-01 | -1,963192918 | 1,38E+00  | 2,40E-01 | 5,50E-01 | 1700001C19Rik | 0,58 | No  |
| ENSMUSG00000047153 | -2,68E-01 | 5,917430242  | 1,68E+01  | 4,18E-05 | 1,17E-03 | Khynyn        | 0,83 | Yes |
| ENSMUSG00000047155 | -3,83E-02 | -3,107651936 | -7,91E-11 | 1,00E+00 | 1,00E+00 | Cyp4x1        | 0,97 | No  |
| ENSMUSG00000047180 | -1,83E-01 | 6,889851229  | 8,97E+00  | 2,74E-03 | 3,58E-02 | Neurl3        | 0,88 | Yes |
| ENSMUSG00000047181 | -3,02E-01 | 0,957285487  | 2,28E+00  | 1,31E-01 | 4,55E-01 | Samd14        | 0,81 | No  |
| ENSMUSG00000047182 | -1,37E-01 | -0,126846021 | 2,09E-01  | 6,47E-01 | 8,75E-01 | Irs3          | 0,91 | No  |



|                    |           |              |           |          |          |           |       |     |
|--------------------|-----------|--------------|-----------|----------|----------|-----------|-------|-----|
| ENSMUSG00000047187 | 5,45E-02  | 6,054701193  | 6,99E-01  | 4,03E-01 | 7,01E-01 | Rab2a     | 1,04  | No  |
| ENSMUSG00000047193 | 1,70E-01  | 3,69882361   | 3,17E+00  | 7,52E-02 | 3,49E-01 | Dync2h1   | 1,12  | No  |
| ENSMUSG00000047197 | -6,17E-02 | -2,311147019 | 6,15E-03  | 9,37E-01 | 1,00E+00 | Gjd3      | 0,96  | No  |
| ENSMUSG00000047205 | 1,45E-01  | 3,02192611   | 1,64E+00  | 2,01E-01 | 5,50E-01 | Dusp18    | 1,11  | No  |
| ENSMUSG00000047213 | 8,16E-02  | 6,799502238  | 1,76E+00  | 1,84E-01 | 5,48E-01 | Ythdf3    | 1,06  | No  |
| ENSMUSG00000047215 | -8,37E-02 | 4,351300407  | 1,03E+00  | 3,11E-01 | 6,11E-01 | Rpl9      | 0,94  | No  |
| ENSMUSG00000047220 | 3,50E+00  | -2,655169204 | 5,32E+00  | 2,11E-02 | 1,56E-01 | Ccdc36    | 11,32 | No  |
| ENSMUSG00000047221 | 7,44E-02  | 2,019499709  | 2,59E-01  | 6,10E-01 | 8,52E-01 | Fam185a   | 1,05  | No  |
| ENSMUSG00000047222 | 4,57E-01  | 6,474030453  | 5,16E+01  | 6,66E-13 | 8,32E-11 | Rnase2a   | 1,37  | Yes |
| ENSMUSG00000047227 | -1,60E-01 | 0,778824879  | 5,30E-01  | 4,67E-01 | 7,55E-01 | Gm527     | 0,89  | No  |
| ENSMUSG00000047228 | -3,19E+00 | -2,963221167 | 4,28E+00  | 3,87E-02 | 2,33E-01 | A2ml1     | 0,11  | No  |
| ENSMUSG00000047246 | -2,44E-01 | 2,417085829  | 3,45E+00  | 6,34E-02 | 3,14E-01 | Hist1h2be | 0,84  | No  |
| ENSMUSG00000047248 | 1,22E-01  | 5,250535488  | 2,91E+00  | 8,81E-02 | 3,79E-01 | C2cd3     | 1,09  | No  |
| ENSMUSG00000047250 | -3,70E-01 | 7,791427112  | 3,97E+01  | 3,01E-10 | 2,66E-08 | Ptgs1     | 0,77  | Yes |
| ENSMUSG00000047257 | -2,70E+00 | -2,963266517 | 2,89E+00  | 8,90E-02 | 3,79E-01 | Prss45    | 0,15  | No  |
| ENSMUSG00000047260 | 7,98E-03  | 5,147202801  | 1,20E-02  | 9,13E-01 | 1,00E+00 | Emc6      | 1,01  | No  |
| ENSMUSG00000047264 | -6,48E-02 | 3,891090468  | 5,08E-01  | 4,76E-01 | 7,64E-01 | Zfp358    | 0,96  | No  |
| ENSMUSG00000047281 | 3,42E-03  | 2,191331897  | 5,84E-04  | 9,81E-01 | 1,00E+00 | Sfn       | 1,00  | No  |
| ENSMUSG00000047284 | 1,06E-01  | 5,234951661  | 2,21E+00  | 1,37E-01 | 4,68E-01 | Neurl4    | 1,08  | No  |
| ENSMUSG00000047286 | -1,33E+00 | -2,770632423 | 1,11E+00  | 2,92E-01 | 5,87E-01 | Olf370    | 0,40  | No  |
| ENSMUSG00000047293 | -2,21E-01 | 3,995901734  | 6,25E+00  | 1,24E-02 | 1,10E-01 | Gpr15     | 0,86  | No  |
| ENSMUSG00000047295 | -3,83E-02 | -3,107651936 | -7,91E-11 | 1,00E+00 | 1,00E+00 | Smgc      | 0,97  | No  |
| ENSMUSG00000047298 | 1,87E+00  | -3,107639691 | 1,38E+00  | 2,40E-01 | 5,50E-01 | Kcnv2     | 3,67  | No  |
| ENSMUSG00000047342 | -1,11E+00 | -1,485197198 | 4,31E+00  | 3,79E-02 | 2,31E-01 | Zfp286    | 0,46  | No  |
| ENSMUSG00000047343 | -1,71E-01 | -1,522575291 | 9,24E-02  | 7,61E-01 | 9,37E-01 | Mettl21c  | 0,89  | No  |
| ENSMUSG00000047347 | 6,00E-02  | 2,457765857  | 2,07E-01  | 6,49E-01 | 8,75E-01 | Tdg-ps    | 1,04  | No  |
| ENSMUSG00000047361 | 3,14E-02  | -3,107617333 | -7,69E-10 | 1,00E+00 | 1,00E+00 | Gm973     | 1,02  | No  |
| ENSMUSG00000047363 | -1,35E+00 | -2,832034248 | 1,15E+00  | 2,84E-01 | 5,81E-01 | Cstad     | 0,39  | No  |
| ENSMUSG00000047368 | 4,99E-02  | 4,855821879  | 4,33E-01  | 5,11E-01 | 7,94E-01 | Abhd17b   | 1,04  | No  |
| ENSMUSG00000047369 | 9,28E-02  | 2,191435648  | 4,28E-01  | 5,13E-01 | 7,95E-01 | Dnah14    | 1,07  | No  |
| ENSMUSG00000047370 | 2,19E-01  | 4,589768847  | 7,49E+00  | 6,20E-03 | 6,58E-02 | Gm7367    | 1,16  | No  |
| ENSMUSG00000047371 | 9,22E-02  | 3,508185982  | 8,85E-01  | 3,47E-01 | 6,48E-01 | Zfp768    | 1,07  | No  |

|                    |           |              |          |          |          |               |      |     |
|--------------------|-----------|--------------|----------|----------|----------|---------------|------|-----|
| ENSMUSG00000047379 | 1,57E-02  | 4,162194093  | 3,35E-02 | 8,55E-01 | 9,92E-01 | B4gat1        | 1,01 | No  |
| ENSMUSG00000047388 | -4,79E-01 | 6,735042065  | 6,06E+01 | 7,12E-15 | 1,08E-12 | Atmin         | 0,72 | Yes |
| ENSMUSG00000047394 | 1,85E+00  | -3,107657832 | 1,35E+00 | 2,46E-01 | 5,50E-01 | Odf3b         | 3,61 | No  |
| ENSMUSG00000047407 | 4,13E-02  | 6,119436205  | 4,04E-01 | 5,25E-01 | 8,02E-01 | Tgif1         | 1,03 | No  |
| ENSMUSG00000047409 | 1,37E-01  | 4,077684726  | 2,36E+00 | 1,25E-01 | 4,41E-01 | Ctdspl        | 1,10 | No  |
| ENSMUSG00000047412 | 3,53E-02  | 5,218439061  | 2,43E-01 | 6,22E-01 | 8,58E-01 | Zbtb44        | 1,02 | No  |
| ENSMUSG00000047414 | -4,40E-02 | 3,667856863  | 2,22E-01 | 6,38E-01 | 8,68E-01 | Flrt2         | 0,97 | No  |
| ENSMUSG00000047415 | 2,29E-02  | 5,637213548  | 1,16E-01 | 7,33E-01 | 9,23E-01 | Gpr68         | 1,02 | No  |
| ENSMUSG00000047417 | -3,77E-03 | 6,386527486  | 3,52E-03 | 9,53E-01 | 1,00E+00 | Rexo1         | 1,00 | No  |
| ENSMUSG00000047419 | -3,92E-01 | -2,165734894 | 3,19E-01 | 5,72E-01 | 8,32E-01 | Cmya5         | 0,76 | No  |
| ENSMUSG00000047423 | -1,39E-01 | 4,976344393  | 3,53E+00 | 6,03E-02 | 3,04E-01 | Al837181      | 0,91 | No  |
| ENSMUSG00000047428 | 3,94E-01  | -1,31114327  | 6,36E-01 | 4,25E-01 | 7,19E-01 | Dlk2          | 1,31 | No  |
| ENSMUSG00000047434 | 2,94E-02  | 5,152202492  | 1,65E-01 | 6,85E-01 | 8,96E-01 | Xxylt1        | 1,02 | No  |
| ENSMUSG00000047443 | 2,11E-01  | -0,954535004 | 2,00E-01 | 6,55E-01 | 8,79E-01 | Erfe          | 1,16 | No  |
| ENSMUSG00000047446 | 1,23E-02  | 3,079478168  | 1,26E-02 | 9,11E-01 | 1,00E+00 | Arl4a         | 1,01 | No  |
| ENSMUSG00000047454 | -1,28E-01 | 4,309686158  | 2,39E+00 | 1,22E-01 | 4,36E-01 | Gphn          | 0,91 | No  |
| ENSMUSG00000047459 | -4,63E-02 | 6,019124613  | 5,03E-01 | 4,78E-01 | 7,66E-01 | Dynlrb1       | 0,97 | No  |
| ENSMUSG00000047462 | 8,98E-02  | 0,666635272  | 1,39E-01 | 7,09E-01 | 9,09E-01 | A530099J19Rik | 1,06 | No  |
| ENSMUSG00000047466 | -4,09E-02 | 4,292382601  | 2,41E-01 | 6,24E-01 | 8,58E-01 | 8030462N17Rik | 0,97 | No  |
| ENSMUSG00000047473 | -6,81E-02 | -1,929261663 | 9,72E-03 | 9,21E-01 | 1,00E+00 | Zfp30         | 0,95 | No  |
| ENSMUSG00000047495 | -6,03E-02 | -2,600713624 | 1,58E-03 | 9,68E-01 | 1,00E+00 | Dlgap2        | 0,96 | No  |
| ENSMUSG00000047496 | -4,72E-01 | 3,211066832  | 2,06E+01 | 5,68E-06 | 2,03E-04 | Rnf152        | 0,72 | Yes |
| ENSMUSG00000047497 | -1,89E+00 | -3,033648118 | 1,42E+00 | 2,33E-01 | 5,50E-01 | Adamts12      | 0,27 | No  |
| ENSMUSG00000047501 | -1,94E+00 | -3,107619243 | 1,50E+00 | 2,21E-01 | 5,50E-01 | Cldn4         | 0,26 | No  |
| ENSMUSG00000047502 | -1,24E+00 | -2,600667663 | 1,46E+00 | 2,27E-01 | 5,50E-01 | Mroh7         | 0,42 | No  |
| ENSMUSG00000047507 | 1,30E-01  | 0,344983184  | 2,40E-01 | 6,25E-01 | 8,59E-01 | Baiap3        | 1,09 | No  |
| ENSMUSG00000047508 | 4,14E-01  | -2,655198619 | 1,34E-01 | 7,14E-01 | 9,12E-01 | Mbd3l2        | 1,33 | No  |
| ENSMUSG00000047509 | 1,99E-01  | 3,27673066   | 3,67E+00 | 5,54E-02 | 2,88E-01 | Gm6776        | 1,15 | No  |
| ENSMUSG00000047511 | 3,01E-01  | -2,401419708 | 9,23E-02 | 7,61E-01 | 9,37E-01 | Olfr1396      | 1,23 | No  |
| ENSMUSG00000047514 | 3,04E-02  | 6,415785401  | 2,32E-01 | 6,30E-01 | 8,62E-01 | Tspyl1        | 1,02 | No  |
| ENSMUSG00000047515 | 1,42E-01  | 2,488522006  | 1,19E+00 | 2,75E-01 | 5,71E-01 | BC049715      | 1,10 | No  |
| ENSMUSG00000047517 | -1,89E+00 | -3,1076441   | 1,42E+00 | 2,33E-01 | 5,50E-01 | Dmbt1         | 0,27 | No  |

|                    |           |              |           |          |          |               |      |     |
|--------------------|-----------|--------------|-----------|----------|----------|---------------|------|-----|
| ENSMUSG00000047518 | 6,87E-01  | -2,896156707 | 2,56E-01  | 6,13E-01 | 8,53E-01 | Sifnl1        | 1,61 | No  |
| ENSMUSG00000047528 | -1,48E-01 | 1,783888657  | 8,56E-01  | 3,55E-01 | 6,56E-01 | Als2cr12      | 0,90 | No  |
| ENSMUSG00000047534 | 3,16E-01  | 4,494388161  | 1,53E+01  | 8,94E-05 | 2,21E-03 | Mis18bp1      | 1,24 | Yes |
| ENSMUSG00000047539 | 9,35E-02  | 5,982411215  | 2,02E+00  | 1,55E-01 | 4,99E-01 | Fbxo28        | 1,07 | No  |
| ENSMUSG00000047547 | 1,31E-01  | 5,608119835  | 3,69E+00  | 5,49E-02 | 2,87E-01 | Cltb          | 1,10 | No  |
| ENSMUSG00000047554 | 1,69E-01  | 4,765970596  | 4,78E+00  | 2,87E-02 | 1,93E-01 | Tmem41b       | 1,12 | No  |
| ENSMUSG00000047557 | -6,45E-02 | 4,942090112  | 7,55E-01  | 3,85E-01 | 6,86E-01 | Lxn           | 0,96 | No  |
| ENSMUSG00000047562 | 1,88E+00  | -2,963229875 | 1,37E+00  | 2,42E-01 | 5,50E-01 | Mmp10         | 3,68 | No  |
| ENSMUSG00000047565 | -5,99E-02 | 5,532068312  | 7,56E-01  | 3,85E-01 | 6,86E-01 | Acot10        | 0,96 | No  |
| ENSMUSG00000047583 | 1,87E-01  | 1,511656567  | 1,17E+00  | 2,79E-01 | 5,75E-01 | Tyw3          | 1,14 | No  |
| ENSMUSG00000047586 | 1,55E-01  | 1,499265726  | 7,29E-01  | 3,93E-01 | 6,93E-01 | Nccrp1        | 1,11 | No  |
| ENSMUSG00000047591 | 5,79E-01  | -0,333266586 | 2,62E+00  | 1,05E-01 | 3,97E-01 | Mafa          | 1,49 | No  |
| ENSMUSG00000047592 | -2,98E-01 | 1,936920323  | 3,71E+00  | 5,40E-02 | 2,84E-01 | Nxpe5         | 0,81 | No  |
| ENSMUSG00000047603 | 1,76E-01  | 1,977652035  | 1,42E+00  | 2,34E-01 | 5,50E-01 | Zfp235        | 1,13 | No  |
| ENSMUSG00000047604 | 1,82E-01  | 2,216892298  | 1,68E+00  | 1,95E-01 | 5,50E-01 | Frat2         | 1,13 | No  |
| ENSMUSG00000047606 | 4,51E-01  | -2,600686338 | 1,58E-01  | 6,91E-01 | 8,99E-01 | Ankrd34c      | 1,37 | No  |
| ENSMUSG00000047613 | 3,25E-02  | 4,229301159  | 1,46E-01  | 7,02E-01 | 9,06E-01 | A430005L14Rik | 1,02 | No  |
| ENSMUSG00000047617 | -1,07E-01 | 2,688066493  | 7,53E-01  | 3,86E-01 | 6,87E-01 | Paxx          | 0,93 | No  |
| ENSMUSG00000047631 | -2,94E-01 | 1,199691918  | 2,27E+00  | 1,32E-01 | 4,57E-01 | Apof          | 0,82 | No  |
| ENSMUSG00000047632 | -1,12E-01 | 1,371963123  | 3,75E-01  | 5,40E-01 | 8,10E-01 | Fgfbp3        | 0,93 | No  |
| ENSMUSG00000047635 | 2,56E-01  | 3,256871383  | 5,97E+00  | 1,45E-02 | 1,23E-01 | 2810006K23Rik | 1,19 | No  |
| ENSMUSG00000047636 | -7,38E-02 | -3,033659033 | 2,66E-03  | 9,59E-01 | 1,00E+00 | Cdcp2         | 0,95 | No  |
| ENSMUSG00000047638 | -5,64E-01 | -2,600712266 | 2,49E-01  | 6,18E-01 | 8,55E-01 | Nr1h4         | 0,68 | No  |
| ENSMUSG00000047642 | 6,84E-01  | -2,896181084 | 2,54E-01  | 6,14E-01 | 8,53E-01 | D930020B18Rik | 1,61 | No  |
| ENSMUSG00000047643 | 8,25E-01  | 0,412248272  | 9,91E+00  | 1,64E-03 | 2,39E-02 | Gm5454        | 1,77 | Yes |
| ENSMUSG00000047648 | 1,91E-01  | 4,079835661  | 4,74E+00  | 2,95E-02 | 1,96E-01 | Fbxo30        | 1,14 | No  |
| ENSMUSG00000047649 | 1,88E-01  | 4,215922371  | 4,84E+00  | 2,78E-02 | 1,88E-01 | Cd3eap        | 1,14 | No  |
| ENSMUSG00000047652 | 3,14E-02  | -3,107617333 | -7,69E-10 | 1,00E+00 | 1,00E+00 | Pea15b        | 1,02 | No  |
| ENSMUSG00000047654 | 1,62E-01  | 0,105370244  | 3,53E-01  | 5,53E-01 | 8,19E-01 | Tssk6         | 1,12 | No  |
| ENSMUSG00000047656 | -1,37E-01 | 2,962052482  | 1,49E+00  | 2,22E-01 | 5,50E-01 | Trpt1         | 0,91 | No  |
| ENSMUSG00000047657 | 7,82E-02  | 4,645666701  | 9,94E-01  | 3,19E-01 | 6,19E-01 | Crry-ps       | 1,06 | No  |
| ENSMUSG00000047669 | -1,42E-01 | 2,534350999  | 1,14E+00  | 2,85E-01 | 5,82E-01 | Msl3l2        | 0,91 | No  |

|                    |           |              |          |          |          |               |      |     |
|--------------------|-----------|--------------|----------|----------|----------|---------------|------|-----|
| ENSMUSG00000047671 | 6,54E-01  | 0,955259853  | 8,48E+00 | 3,59E-03 | 4,38E-02 | Tctex1d4      | 1,57 | Yes |
| ENSMUSG00000047675 | -1,55E-01 | 5,41455982   | 4,99E+00 | 2,55E-02 | 1,77E-01 | Rps8          | 0,90 | No  |
| ENSMUSG00000047676 | -2,25E-01 | 9,511514785  | 1,59E+01 | 6,72E-05 | 1,74E-03 | Rpsa-ps10     | 0,86 | Yes |
| ENSMUSG00000047692 | -1,23E+00 | -3,146117124 | 7,12E-01 | 3,99E-01 | 6,98E-01 | 4930533K18Rik | 0,42 | No  |
| ENSMUSG00000047702 | -1,34E+00 | -2,831974452 | 1,12E+00 | 2,89E-01 | 5,85E-01 | Olfr1388      | 0,39 | No  |
| ENSMUSG00000047710 | -4,76E-02 | 5,10675099   | 4,27E-01 | 5,13E-01 | 7,95E-01 | Champ1        | 0,97 | No  |
| ENSMUSG00000047712 | 2,81E-01  | 2,486374463  | 4,66E+00 | 3,08E-02 | 2,02E-01 | Ust           | 1,22 | No  |
| ENSMUSG00000047714 | 2,50E-02  | 5,626935797  | 1,34E-01 | 7,14E-01 | 9,12E-01 | Ppp1r2        | 1,02 | No  |
| ENSMUSG00000047716 | -5,20E-02 | -2,711697956 | 1,85E-03 | 9,66E-01 | 1,00E+00 | Olfr736       | 0,96 | No  |
| ENSMUSG00000047719 | 8,89E-02  | 3,457333751  | 7,64E-01 | 3,82E-01 | 6,83E-01 | Ubiad1        | 1,06 | No  |
| ENSMUSG00000047720 | 1,87E+00  | -3,107639691 | 1,38E+00 | 2,40E-01 | 5,50E-01 | 4922502D21Rik | 3,67 | No  |
| ENSMUSG00000047721 | 7,76E-03  | 5,27300147   | 1,18E-02 | 9,14E-01 | 1,00E+00 | Bola2         | 1,01 | No  |
| ENSMUSG00000047730 | -2,98E-01 | -2,683143414 | 7,55E-02 | 7,83E-01 | 9,50E-01 | Fcgbp         | 0,81 | No  |
| ENSMUSG00000047731 | 2,08E-02  | 6,801935906  | 1,14E-01 | 7,36E-01 | 9,24E-01 | Wbp1l         | 1,01 | No  |
| ENSMUSG00000047733 | -4,22E-01 | -1,289483744 | 7,05E-01 | 4,01E-01 | 6,99E-01 | Tmem262       | 0,75 | No  |
| ENSMUSG00000047735 | 4,11E-01  | 6,493385922  | 4,26E+01 | 6,63E-11 | 6,43E-09 | Samd9l        | 1,33 | Yes |
| ENSMUSG00000047746 | -1,53E-01 | 0,210265965  | 3,43E-01 | 5,58E-01 | 8,22E-01 | Fbxo40        | 0,90 | No  |
| ENSMUSG00000047747 | 4,13E-01  | 4,718263835  | 2,81E+01 | 1,13E-07 | 6,24E-06 | Rnf150        | 1,33 | Yes |
| ENSMUSG00000047749 | -8,66E-02 | 1,981724698  | 3,40E-01 | 5,60E-01 | 8,23E-01 | Zc3hav1l      | 0,94 | No  |
| ENSMUSG00000047751 | -1,60E+00 | -1,929140222 | 5,78E+00 | 1,62E-02 | 1,32E-01 | Utf1          | 0,33 | No  |
| ENSMUSG00000047759 | 5,93E-01  | 1,529775441  | 1,09E+01 | 9,73E-04 | 1,58E-02 | Hs3st3a1      | 1,51 | Yes |
| ENSMUSG00000047766 | 1,15E-01  | 2,708469689  | 8,98E-01 | 3,43E-01 | 6,44E-01 | Lrrc49        | 1,08 | No  |
| ENSMUSG00000047767 | -1,46E-01 | 3,330317457  | 1,98E+00 | 1,59E-01 | 5,07E-01 | Atg16l2       | 0,90 | No  |
| ENSMUSG00000047777 | 4,29E-02  | 3,457057317  | 1,93E-01 | 6,60E-01 | 8,82E-01 | Phf13         | 1,03 | No  |
| ENSMUSG00000047786 | -1,26E+00 | -2,600695413 | 1,52E+00 | 2,18E-01 | 5,50E-01 | Lix1          | 0,42 | No  |
| ENSMUSG00000047787 | -2,26E+00 | -2,655083267 | 4,17E+00 | 4,11E-02 | 2,40E-01 | Flrt1         | 0,21 | No  |
| ENSMUSG00000047789 | 9,41E-02  | 5,597794084  | 1,90E+00 | 1,68E-01 | 5,23E-01 | Slc38a9       | 1,07 | No  |
| ENSMUSG00000047793 | -5,74E-01 | 4,639288335  | 5,53E+01 | 1,03E-13 | 1,42E-11 | Sned1         | 0,67 | Yes |
| ENSMUSG00000047798 | 3,29E-01  | 8,346186453  | 3,24E+01 | 1,27E-08 | 8,66E-07 | Cd300lf       | 1,26 | Yes |
| ENSMUSG00000047804 | 2,08E-01  | 5,549923848  | 9,22E+00 | 2,39E-03 | 3,23E-02 | Akap10        | 1,15 | Yes |
| ENSMUSG00000047807 | 1,78E+00  | -2,963287612 | 1,28E+00 | 2,58E-01 | 5,50E-01 | 9330154K18Rik | 3,44 | No  |
| ENSMUSG00000047810 | -1,66E-01 | 7,71655487   | 8,04E+00 | 4,58E-03 | 5,23E-02 | Ccdc88b       | 0,89 | No  |

|                    |           |              |           |          |          |               |      |     |
|--------------------|-----------|--------------|-----------|----------|----------|---------------|------|-----|
| ENSMUSG00000047819 | 2,38E-01  | -2,355508396 | 7,14E-02  | 7,89E-01 | 9,54E-01 | Tigd4         | 1,18 | No  |
| ENSMUSG00000047821 | 4,48E-02  | 4,044128022  | 2,62E-01  | 6,09E-01 | 8,51E-01 | Trim16        | 1,03 | No  |
| ENSMUSG00000047822 | -5,69E-01 | -1,879929364 | 8,01E-01  | 3,71E-01 | 6,72E-01 | Angptl8       | 0,67 | No  |
| ENSMUSG00000047824 | -1,06E-02 | 6,367337643  | 2,81E-02  | 8,67E-01 | 9,99E-01 | Pygo2         | 0,99 | No  |
| ENSMUSG00000047832 | 1,09E-01  | 5,619541716  | 2,55E+00  | 1,10E-01 | 4,07E-01 | Cdca4         | 1,08 | No  |
| ENSMUSG00000047841 | -1,04E+00 | -1,600521623 | 3,86E+00  | 4,95E-02 | 2,69E-01 | Fndc11        | 0,49 | No  |
| ENSMUSG00000047842 | 4,99E-01  | 3,179995233  | 2,14E+01  | 3,82E-06 | 1,44E-04 | Diras2        | 1,41 | Yes |
| ENSMUSG00000047843 | -3,79E-02 | 5,647556201  | 3,13E-01  | 5,76E-01 | 8,34E-01 | Bri3          | 0,97 | No  |
| ENSMUSG00000047854 | 6,44E-01  | -1,448757595 | 1,60E+00  | 2,06E-01 | 5,50E-01 | Stx19         | 1,56 | No  |
| ENSMUSG00000047861 | -2,73E-02 | -2,963256629 | 3,40E-04  | 9,85E-01 | 1,00E+00 | Foxi1         | 0,98 | No  |
| ENSMUSG00000047866 | -4,67E-02 | 5,836644245  | 4,92E-01  | 4,83E-01 | 7,70E-01 | Lonp2         | 0,97 | No  |
| ENSMUSG00000047867 | -1,48E+00 | -0,68299154  | 1,49E+01  | 1,16E-04 | 2,75E-03 | Gimap6        | 0,36 | Yes |
| ENSMUSG00000047875 | -3,85E-01 | 4,392550893  | 2,28E+01  | 1,84E-06 | 7,56E-05 | Gpr157        | 0,77 | Yes |
| ENSMUSG00000047878 | -3,23E-01 | -0,627579844 | 6,91E-01  | 4,06E-01 | 7,02E-01 | A4galt        | 0,80 | No  |
| ENSMUSG00000047879 | 1,08E-01  | 6,322158827  | 2,88E+00  | 8,99E-02 | 3,80E-01 | Usp14         | 1,08 | No  |
| ENSMUSG00000047880 | -4,55E-01 | -0,136378602 | 2,02E+00  | 1,55E-01 | 4,98E-01 | Cxcr5         | 0,73 | No  |
| ENSMUSG00000047881 | 1,94E-01  | 5,487996377  | 7,74E+00  | 5,39E-03 | 5,91E-02 | Rell1         | 1,14 | No  |
| ENSMUSG00000047884 | 4,47E-01  | -2,711719153 | 1,56E-01  | 6,93E-01 | 9,01E-01 | Klk9          | 1,36 | No  |
| ENSMUSG00000047888 | -1,17E-02 | 5,975662856  | 3,16E-02  | 8,59E-01 | 9,95E-01 | Tnrc6b        | 0,99 | No  |
| ENSMUSG00000047889 | -1,94E+00 | -3,107619243 | 1,50E+00  | 2,21E-01 | 5,50E-01 | Serpnb6d      | 0,26 | No  |
| ENSMUSG00000047898 | -7,17E-01 | 0,412595752  | 8,16E+00  | 4,28E-03 | 4,97E-02 | Ccr4          | 0,61 | Yes |
| ENSMUSG00000047904 | 1,20E-01  | -2,146136618 | 2,85E-02  | 8,66E-01 | 9,99E-01 | Sstr2         | 1,09 | No  |
| ENSMUSG00000047905 | -1,22E-01 | 6,137533829  | 3,56E+00  | 5,90E-02 | 3,01E-01 | Gm8566        | 0,92 | No  |
| ENSMUSG00000047907 | -3,83E-02 | -3,107651936 | -7,91E-11 | 1,00E+00 | 1,00E+00 | Tshz2         | 0,97 | No  |
| ENSMUSG00000047909 | -1,05E-02 | 5,683568456  | 2,43E-02  | 8,76E-01 | 1,00E+00 | Ankrd16       | 0,99 | No  |
| ENSMUSG00000047910 | -1,87E+00 | -3,107637761 | 1,39E+00  | 2,38E-01 | 5,50E-01 | Pcdhb16       | 0,27 | No  |
| ENSMUSG00000047911 | 3,04E-01  | -1,289566545 | 3,43E-01  | 5,58E-01 | 8,22E-01 | Npm2          | 1,23 | No  |
| ENSMUSG00000047921 | 6,71E-02  | 5,259393196  | 8,84E-01  | 3,47E-01 | 6,48E-01 | Trappc9       | 1,05 | No  |
| ENSMUSG00000047938 | -1,89E+00 | -2,896152932 | 1,43E+00  | 2,31E-01 | 5,50E-01 | 4930483J18Rik | 0,27 | No  |
| ENSMUSG00000047940 | -1,87E+00 | -3,107637761 | 1,39E+00  | 2,38E-01 | 5,50E-01 | Stpg2         | 0,27 | No  |
| ENSMUSG00000047945 | -6,73E-01 | 7,329690175  | 1,27E+02  | 1,90E-29 | 9,98E-27 | Marcksl1      | 0,63 | Yes |
| ENSMUSG00000047953 | -6,85E-02 | -1,770609041 | 1,21E-02  | 9,13E-01 | 1,00E+00 | Gp5           | 0,95 | No  |

|                    |           |              |           |          |          |               |      |     |
|--------------------|-----------|--------------|-----------|----------|----------|---------------|------|-----|
| ENSMUSG00000047959 | 4,23E-01  | 6,165460385  | 4,17E+01  | 1,05E-10 | 9,95E-09 | Kcna3         | 1,34 | Yes |
| ENSMUSG00000047963 | -2,64E-01 | 2,911831823  | 5,67E+00  | 1,73E-02 | 1,37E-01 | Stbd1         | 0,83 | No  |
| ENSMUSG00000047965 | -1,46E-01 | 6,823743159  | 5,63E+00  | 1,76E-02 | 1,39E-01 | Rpl9-ps7      | 0,90 | No  |
| ENSMUSG00000047976 | 9,01E-03  | -3,107646452 | -5,16E-10 | 1,00E+00 | 1,00E+00 | Kcna1         | 1,01 | No  |
| ENSMUSG00000047977 | 1,87E+00  | -3,03364371  | 1,36E+00  | 2,43E-01 | 5,50E-01 | Synb          | 3,66 | No  |
| ENSMUSG00000047986 | -4,77E-01 | -1,485163983 | 7,93E-01  | 3,73E-01 | 6,74E-01 | Palm3         | 0,72 | No  |
| ENSMUSG00000047988 | 6,18E-01  | 0,425449926  | 5,90E+00  | 1,51E-02 | 1,27E-01 | 4933428G20Rik | 1,53 | No  |
| ENSMUSG00000047989 | 2,35E-02  | 5,353549033  | 1,12E-01  | 7,38E-01 | 9,26E-01 | Ino80c        | 1,02 | No  |
| ENSMUSG00000047990 | 1,89E+00  | -3,033614598 | 1,38E+00  | 2,40E-01 | 5,50E-01 | C2cd4a        | 3,70 | No  |
| ENSMUSG00000047992 | -8,15E-01 | -2,770593901 | 3,65E-01  | 5,45E-01 | 8,14E-01 | Fam69c        | 0,57 | No  |
| ENSMUSG00000048000 | 4,66E-02  | 6,100249697  | 5,17E-01  | 4,72E-01 | 7,60E-01 | Gigyf2        | 1,03 | No  |
| ENSMUSG00000048001 | -2,38E+00 | -3,033624832 | 2,22E+00  | 1,36E-01 | 4,66E-01 | Hes5          | 0,19 | No  |
| ENSMUSG00000048003 | -1,94E+00 | -3,107619243 | 1,50E+00  | 2,21E-01 | 5,50E-01 | Catsper4      | 0,26 | No  |
| ENSMUSG00000048012 | 1,81E-01  | 1,567228184  | 1,17E+00  | 2,80E-01 | 5,77E-01 | Zfp473        | 1,13 | No  |
| ENSMUSG00000048022 | -3,34E-01 | -1,770673236 | 3,11E-01  | 5,77E-01 | 8,35E-01 | Tmem229a      | 0,79 | No  |
| ENSMUSG00000048027 | -2,03E-01 | 3,544255979  | 4,43E+00  | 3,52E-02 | 2,22E-01 | Rgmb          | 0,87 | No  |
| ENSMUSG00000048029 | -1,96E-01 | 0,952933245  | 8,19E-01  | 3,65E-01 | 6,66E-01 | Eno4          | 0,87 | No  |
| ENSMUSG00000048031 | -1,41E+00 | -1,62751742  | 6,57E+00  | 1,04E-02 | 9,60E-02 | Fcrl5         | 0,38 | No  |
| ENSMUSG00000048038 | -6,67E-02 | -2,655134332 | 3,00E-03  | 9,56E-01 | 1,00E+00 | Ccdc187       | 0,95 | No  |
| ENSMUSG00000048039 | -1,14E-02 | 5,268137852  | 2,56E-02  | 8,73E-01 | 1,00E+00 | Isg20l2       | 0,99 | No  |
| ENSMUSG00000048058 | -7,66E-02 | 3,608355851  | 6,32E-01  | 4,27E-01 | 7,21E-01 | Ldlrad3       | 0,95 | No  |
| ENSMUSG00000048065 | -3,89E-01 | -1,998028588 | 3,33E-01  | 5,64E-01 | 8,26E-01 | Cyb5r2        | 0,76 | No  |
| ENSMUSG00000048076 | 4,67E-02  | 8,451878554  | 6,58E-01  | 4,17E-01 | 7,12E-01 | Arf1          | 1,03 | No  |
| ENSMUSG00000048078 | 3,13E-01  | 1,083238985  | 2,41E+00  | 1,21E-01 | 4,33E-01 | Tenm4         | 1,24 | No  |
| ENSMUSG00000048080 | 1,87E+00  | -3,107639691 | 1,38E+00  | 2,40E-01 | 5,50E-01 | Olfr731       | 3,67 | No  |
| ENSMUSG00000048087 | 1,33E-01  | 5,513510775  | 3,64E+00  | 5,63E-02 | 2,91E-01 | Gm4737        | 1,10 | No  |
| ENSMUSG00000048100 | 2,01E-02  | 4,27866891   | 5,75E-02  | 8,11E-01 | 9,66E-01 | Taf13         | 1,01 | No  |
| ENSMUSG00000048106 | 6,71E-02  | 2,681807114  | 3,15E-01  | 5,74E-01 | 8,33E-01 | 4632415L05Rik | 1,05 | No  |
| ENSMUSG00000048108 | -2,56E-02 | -0,697333831 | 4,67E-03  | 9,46E-01 | 1,00E+00 | Tmem72        | 0,98 | No  |
| ENSMUSG00000048109 | 1,12E-01  | 5,334799129  | 2,50E+00  | 1,14E-01 | 4,17E-01 | Rbm15         | 1,08 | No  |
| ENSMUSG00000048118 | -1,13E-01 | 5,736304489  | 2,83E+00  | 9,28E-02 | 3,83E-01 | Arid4a        | 0,92 | No  |
| ENSMUSG00000048120 | 1,96E-01  | 6,680179681  | 9,94E+00  | 1,62E-03 | 2,37E-02 | Entpd1        | 1,15 | Yes |

|                    |           |              |           |          |          |               |      |     |
|--------------------|-----------|--------------|-----------|----------|----------|---------------|------|-----|
| ENSMUSG00000048126 | -1,85E+00 | -0,895903544 | 1,75E+01  | 2,84E-05 | 8,38E-04 | Col6a3        | 0,28 | Yes |
| ENSMUSG00000048138 | 1,86E+00  | -2,963235356 | 1,35E+00  | 2,46E-01 | 5,50E-01 | Dmrt2         | 3,62 | No  |
| ENSMUSG00000048142 | -1,06E-01 | 0,892579915  | 2,34E-01  | 6,29E-01 | 8,62E-01 | Nat8l         | 0,93 | No  |
| ENSMUSG00000048148 | -5,35E-01 | -2,31115529  | 4,59E-01  | 4,98E-01 | 7,83E-01 | Nwd1          | 0,69 | No  |
| ENSMUSG00000048153 | -3,67E-01 | -0,896064608 | 8,00E-01  | 3,71E-01 | 6,72E-01 | Olfr49        | 0,78 | No  |
| ENSMUSG00000048154 | 1,11E-01  | 7,651178304  | 3,54E+00  | 6,00E-02 | 3,03E-01 | Kmt2d         | 1,08 | No  |
| ENSMUSG00000048163 | -5,77E-02 | 9,346983649  | 1,04E+00  | 3,08E-01 | 6,07E-01 | Selplg        | 0,96 | No  |
| ENSMUSG00000048164 | 7,57E-02  | 7,243934334  | 1,59E+00  | 2,08E-01 | 5,50E-01 | Gm7204        | 1,05 | No  |
| ENSMUSG00000048170 | 1,03E-01  | 6,38516745   | 2,66E+00  | 1,03E-01 | 3,95E-01 | Mcmbp         | 1,07 | No  |
| ENSMUSG00000048174 | 2,59E-01  | 2,561389099  | 4,20E+00  | 4,05E-02 | 2,38E-01 | Tmem81        | 1,20 | No  |
| ENSMUSG00000048175 | 1,08E-01  | 5,299765626  | 2,32E+00  | 1,28E-01 | 4,49E-01 | Asb8          | 1,08 | No  |
| ENSMUSG00000048185 | -2,65E+00 | -3,033633091 | 2,78E+00  | 9,55E-02 | 3,86E-01 | Gm7075        | 0,16 | No  |
| ENSMUSG00000048186 | -2,70E+00 | -3,033614577 | 2,89E+00  | 8,93E-02 | 3,79E-01 | Bend7         | 0,15 | No  |
| ENSMUSG00000048188 | -1,04E-03 | 3,750250155  | 1,22E-04  | 9,91E-01 | 1,00E+00 | Gm8181        | 1,00 | No  |
| ENSMUSG00000048191 | -1,96E-01 | 0,804171396  | 6,58E-01  | 4,17E-01 | 7,12E-01 | Muc6          | 0,87 | No  |
| ENSMUSG00000048200 | 3,23E-01  | 4,581749544  | 1,64E+01  | 5,23E-05 | 1,41E-03 | Cracr2b       | 1,25 | Yes |
| ENSMUSG00000048206 | -1,90E+00 | -3,033594154 | 1,44E+00  | 2,30E-01 | 5,50E-01 | Dnajb8        | 0,27 | No  |
| ENSMUSG00000048215 | -8,81E-02 | -2,832010489 | 5,36E-03  | 9,42E-01 | 1,00E+00 | A630023P12Rik | 0,94 | No  |
| ENSMUSG00000048216 | 2,81E-01  | 4,500156753  | 1,23E+01  | 4,46E-04 | 8,37E-03 | Gpr85         | 1,22 | Yes |
| ENSMUSG00000048217 | 3,37E-01  | 2,206385274  | 5,76E+00  | 1,64E-02 | 1,33E-01 | Nags          | 1,26 | No  |
| ENSMUSG00000048218 | 1,10E-01  | 3,89970093   | 1,44E+00  | 2,31E-01 | 5,50E-01 | Amigo2        | 1,08 | No  |
| ENSMUSG00000048222 | -3,46E-03 | 5,033815693  | 2,21E-03  | 9,63E-01 | 1,00E+00 | Mfap1b        | 1,00 | No  |
| ENSMUSG00000048230 | -3,83E-02 | -3,107651936 | -7,91E-11 | 1,00E+00 | 1,00E+00 | Fbxo43        | 0,97 | No  |
| ENSMUSG00000048232 | 8,24E-02  | 2,104217652  | 3,35E-01  | 5,63E-01 | 8,26E-01 | Fbxo10        | 1,06 | No  |
| ENSMUSG00000048234 | 1,23E-01  | 7,441551155  | 4,30E+00  | 3,82E-02 | 2,32E-01 | Rnf149        | 1,09 | No  |
| ENSMUSG00000048240 | -3,60E-01 | 1,023577523  | 2,98E+00  | 8,44E-02 | 3,73E-01 | Gng7          | 0,78 | No  |
| ENSMUSG00000048249 | -1,45E-01 | 5,057030811  | 4,00E+00  | 4,54E-02 | 2,54E-01 | Crebrf        | 0,90 | No  |
| ENSMUSG00000048251 | -3,19E+00 | -2,896117911 | 4,30E+00  | 3,81E-02 | 2,32E-01 | Bcl11b        | 0,11 | No  |
| ENSMUSG00000048261 | 2,75E-01  | 3,982065959  | 9,43E+00  | 2,13E-03 | 2,94E-02 | Gm4879        | 1,21 | Yes |
| ENSMUSG00000048264 | 9,01E-02  | 5,437986113  | 1,67E+00  | 1,97E-01 | 5,50E-01 | Dip2c         | 1,06 | No  |
| ENSMUSG00000048271 | -2,65E-02 | 6,594332534  | 1,82E-01  | 6,70E-01 | 8,88E-01 | Rbm33         | 0,98 | No  |
| ENSMUSG00000048277 | -2,54E-01 | 8,959571345  | 1,99E+01  | 8,16E-06 | 2,80E-04 | Syngn2        | 0,84 | Yes |

|                    |           |              |           |          |          |               |      |     |
|--------------------|-----------|--------------|-----------|----------|----------|---------------|------|-----|
| ENSMUSG00000048279 | 8,94E-02  | 5,684504493  | 1,76E+00  | 1,85E-01 | 5,49E-01 | Sacs          | 1,06 | No  |
| ENSMUSG00000048280 | 1,17E-01  | 4,016366627  | 1,84E+00  | 1,75E-01 | 5,33E-01 | Zfp738        | 1,08 | No  |
| ENSMUSG00000048281 | -2,95E-01 | -2,863708069 | 6,26E-02  | 8,03E-01 | 9,62E-01 | Dleu7         | 0,81 | No  |
| ENSMUSG00000048285 | 1,41E-01  | 4,124018271  | 2,61E+00  | 1,06E-01 | 3,99E-01 | Frmd6         | 1,10 | No  |
| ENSMUSG00000048292 | 7,06E-01  | -1,06112477  | 2,56E+00  | 1,10E-01 | 4,06E-01 | Olfr1417      | 1,63 | No  |
| ENSMUSG00000048307 | 4,21E-02  | 4,906147078  | 3,15E-01  | 5,74E-01 | 8,34E-01 | Ankrd46       | 1,03 | No  |
| ENSMUSG00000048310 | -5,60E-02 | 5,361385544  | 6,35E-01  | 4,25E-01 | 7,20E-01 | Pskh1         | 0,96 | No  |
| ENSMUSG00000048316 | -5,67E-02 | 2,349340634  | 1,78E-01  | 6,73E-01 | 8,90E-01 | Gm9823        | 0,96 | No  |
| ENSMUSG00000048327 | 1,43E-01  | 5,407665492  | 4,15E+00  | 4,16E-02 | 2,42E-01 | Ckap2l        | 1,10 | No  |
| ENSMUSG00000048329 | -1,41E-01 | 3,349894052  | 1,87E+00  | 1,71E-01 | 5,28E-01 | Mfsd6l        | 0,91 | No  |
| ENSMUSG00000048330 | -1,68E-02 | -1,344290484 | 1,07E-03  | 9,74E-01 | 1,00E+00 | Ric3          | 0,99 | No  |
| ENSMUSG00000048332 | 2,93E-01  | 0,685645052  | 1,63E+00  | 2,01E-01 | 5,50E-01 | Lhfp          | 1,23 | No  |
| ENSMUSG00000048334 | 2,52E-02  | 2,016925046  | 2,86E-02  | 8,66E-01 | 9,99E-01 | Gm8258        | 1,02 | No  |
| ENSMUSG00000048337 | 1,85E+00  | -3,107657832 | 1,35E+00  | 2,46E-01 | 5,50E-01 | Npy4r         | 3,61 | No  |
| ENSMUSG00000048347 | -1,87E+00 | -3,107637761 | 1,39E+00  | 2,38E-01 | 5,50E-01 | Pcdhb18       | 0,27 | No  |
| ENSMUSG00000048349 | -8,63E-01 | 4,843064389  | 1,30E+02  | 3,34E-30 | 1,92E-27 | Pou4f1        | 0,55 | Yes |
| ENSMUSG00000048351 | 1,31E-01  | 3,046620163  | 1,39E+00  | 2,38E-01 | 5,50E-01 | Coa7          | 1,09 | No  |
| ENSMUSG00000048368 | -4,09E-01 | -2,655111062 | 1,70E-01  | 6,80E-01 | 8,93E-01 | Omd           | 0,75 | No  |
| ENSMUSG00000048371 | 2,89E-01  | 3,43197936   | 8,24E+00  | 4,09E-03 | 4,81E-02 | Pdp2          | 1,22 | Yes |
| ENSMUSG00000048373 | 3,14E-02  | -3,107617333 | -7,69E-10 | 1,00E+00 | 1,00E+00 | Fgfbp1        | 1,02 | No  |
| ENSMUSG00000048376 | -7,94E-02 | 0,036877088  | 6,97E-02  | 7,92E-01 | 9,55E-01 | F2r           | 0,95 | No  |
| ENSMUSG00000048379 | 7,37E-02  | 5,704427867  | 1,20E+00  | 2,73E-01 | 5,70E-01 | Socs4         | 1,05 | No  |
| ENSMUSG00000048385 | -5,63E-01 | -2,548209898 | 2,49E-01  | 6,18E-01 | 8,55E-01 | Scrt1         | 0,68 | No  |
| ENSMUSG00000048388 | -6,42E-01 | -1,24703555  | 1,52E+00  | 2,18E-01 | 5,50E-01 | Fam171b       | 0,64 | No  |
| ENSMUSG00000048398 | 8,43E-01  | -2,401430632 | 8,55E-01  | 3,55E-01 | 6,56E-01 | Gm5065        | 1,79 | No  |
| ENSMUSG00000048399 | 1,87E+00  | -3,107639691 | 1,38E+00  | 2,40E-01 | 5,50E-01 | Tprg          | 3,67 | No  |
| ENSMUSG00000048402 | -1,89E+00 | -3,033648118 | 1,42E+00  | 2,33E-01 | 5,50E-01 | Gli2          | 0,27 | No  |
| ENSMUSG00000048406 | -1,11E-01 | -0,522823445 | 8,77E-02  | 7,67E-01 | 9,40E-01 | B330016D10Rik | 0,93 | No  |
| ENSMUSG00000048410 | -1,96E-02 | 4,708562008  | 6,42E-02  | 8,00E-01 | 9,60E-01 | Zfp407        | 0,99 | No  |
| ENSMUSG00000048416 | 5,28E-01  | -1,10779654  | 1,28E+00  | 2,59E-01 | 5,51E-01 | Mlf1          | 1,44 | No  |
| ENSMUSG00000048424 | -5,96E-02 | -2,448687971 | 3,25E-03  | 9,55E-01 | 1,00E+00 | Ranbp3l       | 0,96 | No  |
| ENSMUSG00000048429 | 3,30E-02  | 5,593292818  | 2,34E-01  | 6,28E-01 | 8,61E-01 | Timm29        | 1,02 | No  |



|                    |           |              |           |          |          |               |      |     |
|--------------------|-----------|--------------|-----------|----------|----------|---------------|------|-----|
| ENSMUSG00000048439 | 1,29E-01  | 3,360690397  | 1,56E+00  | 2,12E-01 | 5,50E-01 | Nupl2         | 1,09 | No  |
| ENSMUSG00000048440 | 2,90E-02  | 6,361079098  | 2,09E-01  | 6,48E-01 | 8,75E-01 | Cyp4f16       | 1,02 | No  |
| ENSMUSG00000048442 | 5,11E-01  | 3,162497652  | 2,22E+01  | 2,45E-06 | 9,69E-05 | Smim5         | 1,42 | Yes |
| ENSMUSG00000048445 | 9,63E-02  | 2,30425333   | 4,84E-01  | 4,87E-01 | 7,74E-01 | Ccdc57        | 1,07 | No  |
| ENSMUSG00000048450 | 3,14E-02  | -3,107617333 | -7,69E-10 | 1,00E+00 | 1,00E+00 | Msx1          | 1,02 | No  |
| ENSMUSG00000048458 | 1,94E-01  | 3,789899649  | 4,42E+00  | 3,54E-02 | 2,23E-01 | Fam212b       | 1,14 | No  |
| ENSMUSG00000048473 | -8,06E-01 | -2,831995303 | 3,57E-01  | 5,50E-01 | 8,17E-01 | Sult6b2       | 0,57 | No  |
| ENSMUSG00000048478 | -3,13E-01 | -1,574243364 | 2,97E-01  | 5,86E-01 | 8,39E-01 | Spata33       | 0,80 | No  |
| ENSMUSG00000048480 | -1,23E+00 | -1,740841401 | 3,60E+00  | 5,79E-02 | 2,97E-01 | Cxcr1         | 0,43 | No  |
| ENSMUSG00000048481 | -2,90E-01 | 1,692090789  | 3,02E+00  | 8,23E-02 | 3,69E-01 | Mypop         | 0,82 | No  |
| ENSMUSG00000048483 | 2,64E+00  | -2,896131192 | 2,70E+00  | 1,01E-01 | 3,92E-01 | Zdhhc22       | 6,24 | No  |
| ENSMUSG00000048484 | -7,79E-02 | -2,548233292 | 6,99E-03  | 9,33E-01 | 1,00E+00 | Gm7461        | 0,95 | No  |
| ENSMUSG00000048485 | -1,94E+00 | -3,107619243 | 1,50E+00  | 2,21E-01 | 5,50E-01 | Zbtb8b        | 0,26 | No  |
| ENSMUSG00000048486 | 2,35E-01  | 2,333057665  | 3,01E+00  | 8,30E-02 | 3,70E-01 | Fitm2         | 1,18 | No  |
| ENSMUSG00000048489 | 1,20E+00  | -0,195861061 | 1,23E+01  | 4,64E-04 | 8,63E-03 | 8430408G22Rik | 2,29 | Yes |
| ENSMUSG00000048490 | -1,77E-01 | 6,545439593  | 8,12E+00  | 4,39E-03 | 5,06E-02 | Nrip1         | 0,88 | No  |
| ENSMUSG00000048495 | -1,72E-01 | 3,423586758  | 2,85E+00  | 9,17E-02 | 3,82E-01 | Tyw5          | 0,89 | No  |
| ENSMUSG00000048497 | 9,77E-02  | 4,236157104  | 1,32E+00  | 2,50E-01 | 5,50E-01 | Mmgt2         | 1,07 | No  |
| ENSMUSG00000048498 | 1,01E+00  | 4,261986873  | 1,36E+02  | 2,04E-31 | 1,30E-28 | Cd300e        | 2,02 | Yes |
| ENSMUSG00000048502 | -1,94E+00 | -3,107619243 | 1,50E+00  | 2,21E-01 | 5,50E-01 | Duxbl1        | 0,26 | No  |
| ENSMUSG00000048503 | 2,64E+00  | -3,033673223 | 2,69E+00  | 1,01E-01 | 3,92E-01 | Tmem136       | 6,23 | No  |
| ENSMUSG00000048520 | 1,37E+00  | -2,655162032 | 1,92E+00  | 1,66E-01 | 5,19E-01 | Fbxl13        | 2,58 | No  |
| ENSMUSG00000048521 | -3,68E-01 | 1,616443696  | 5,02E+00  | 2,51E-02 | 1,75E-01 | Cxcr6         | 0,77 | No  |
| ENSMUSG00000048528 | 1,22E+00  | -3,146114919 | 6,90E-01  | 4,06E-01 | 7,02E-01 | Nkx1-2        | 2,33 | No  |
| ENSMUSG00000048534 | -3,16E-01 | 7,201763362  | 2,78E+01  | 1,32E-07 | 7,12E-06 | Jaml          | 0,80 | Yes |
| ENSMUSG00000048537 | -1,58E-01 | 4,313932951  | 3,71E+00  | 5,40E-02 | 2,84E-01 | Phldb1        | 0,90 | No  |
| ENSMUSG00000048538 | 3,54E-03  | 3,701200557  | 1,36E-03  | 9,71E-01 | 1,00E+00 | Gm9826        | 1,00 | No  |
| ENSMUSG00000048544 | -3,41E-01 | -2,548220383 | 1,46E-01  | 7,03E-01 | 9,06E-01 | 5930422O12Rik | 0,79 | No  |
| ENSMUSG00000048546 | 1,82E-01  | 5,740406563  | 7,34E+00  | 6,73E-03 | 6,99E-02 | Tob2          | 1,13 | No  |
| ENSMUSG00000048550 | 1,58E-01  | 2,659055814  | 1,72E+00  | 1,90E-01 | 5,50E-01 | Thnsl1        | 1,12 | No  |
| ENSMUSG00000048559 | 4,65E-01  | -1,333295775 | 8,44E-01  | 3,58E-01 | 6,60E-01 | 4930555K19Rik | 1,38 | No  |
| ENSMUSG00000048574 | 1,51E-01  | 4,885564886  | 3,97E+00  | 4,62E-02 | 2,57E-01 | Ccnb1-ps      | 1,11 | No  |

|                    |           |              |          |          |          |               |      |     |
|--------------------|-----------|--------------|----------|----------|----------|---------------|------|-----|
| ENSMUSG00000048578 | 1,00E-01  | 8,87714747   | 3,10E+00 | 7,82E-02 | 3,57E-01 | Mlec          | 1,07 | No  |
| ENSMUSG00000048581 | -3,89E-01 | 2,358798465  | 8,74E+00 | 3,11E-03 | 3,94E-02 | E130311K13Rik | 0,76 | Yes |
| ENSMUSG00000048583 | -2,68E+00 | -2,963200749 | 2,85E+00 | 9,14E-02 | 3,82E-01 | Igf2          | 0,16 | No  |
| ENSMUSG00000048602 | -1,91E+00 | -2,831955981 | 1,45E+00 | 2,28E-01 | 5,50E-01 | Morc2b        | 0,27 | No  |
| ENSMUSG00000048603 | -2,25E-01 | 0,840937747  | 1,11E+00 | 2,92E-01 | 5,87E-01 | Gm9828        | 0,86 | No  |
| ENSMUSG00000048612 | 6,38E-02  | 9,032122682  | 1,26E+00 | 2,62E-01 | 5,56E-01 | Myof          | 1,05 | No  |
| ENSMUSG00000048617 | 2,34E-01  | -1,81646717  | 1,56E-01 | 6,93E-01 | 9,01E-01 | Rtbdn         | 1,18 | No  |
| ENSMUSG00000048620 | -1,89E+00 | -3,1076441   | 1,42E+00 | 2,33E-01 | 5,50E-01 | Olfr1336      | 0,27 | No  |
| ENSMUSG00000048636 | -2,16E+00 | -2,896128696 | 2,57E+00 | 1,09E-01 | 4,05E-01 | A730049H05Rik | 0,22 | No  |
| ENSMUSG00000048644 | 1,99E-01  | -0,54834778  | 3,53E-01 | 5,52E-01 | 8,19E-01 | Ctxn1         | 1,15 | No  |
| ENSMUSG00000048647 | -9,57E-01 | 0,358927266  | 1,39E+01 | 1,93E-04 | 4,23E-03 | Exd1          | 0,51 | Yes |
| ENSMUSG00000048652 | -2,77E-02 | -2,929298853 | 3,59E-04 | 9,85E-01 | 1,00E+00 | Samd13        | 0,98 | No  |
| ENSMUSG00000048655 | 2,57E+00  | -3,0336723   | 2,56E+00 | 1,10E-01 | 4,06E-01 | Ccdc169       | 5,96 | No  |
| ENSMUSG00000048661 | 1,11E-01  | 4,846510605  | 2,12E+00 | 1,45E-01 | 4,82E-01 | Lemd3         | 1,08 | No  |
| ENSMUSG00000048668 | 1,03E-01  | 3,871846588  | 1,30E+00 | 2,55E-01 | 5,50E-01 | Rhno1         | 1,07 | No  |
| ENSMUSG00000048677 | 2,33E-01  | 5,805820364  | 1,21E+01 | 5,03E-04 | 9,21E-03 | Tpcn2         | 1,18 | Yes |
| ENSMUSG00000048696 | 1,64E-01  | 3,389931873  | 2,59E+00 | 1,07E-01 | 4,01E-01 | Mex3d         | 1,12 | No  |
| ENSMUSG00000048701 | -3,55E-01 | 6,697812141  | 3,33E+01 | 7,80E-09 | 5,51E-07 | Ccdc6         | 0,78 | Yes |
| ENSMUSG00000048703 | 1,82E+00  | -3,033661385 | 1,31E+00 | 2,52E-01 | 5,50E-01 | Speer4b       | 3,54 | No  |
| ENSMUSG00000048707 | -4,33E-02 | 4,351175094  | 2,74E-01 | 6,01E-01 | 8,47E-01 | Tprn          | 0,97 | No  |
| ENSMUSG00000048720 | 5,02E-02  | 3,004900716  | 2,06E-01 | 6,50E-01 | 8,76E-01 | Tbc1d12       | 1,04 | No  |
| ENSMUSG00000048721 | -7,43E-01 | 0,16045746   | 6,87E+00 | 8,74E-03 | 8,46E-02 | Fndc9         | 0,60 | No  |
| ENSMUSG00000048731 | 1,49E-02  | 4,397559671  | 3,33E-02 | 8,55E-01 | 9,92E-01 | Ggnbp1        | 1,01 | No  |
| ENSMUSG00000048732 | 9,16E-02  | 3,159787773  | 7,06E-01 | 4,01E-01 | 6,99E-01 | Klhl11        | 1,07 | No  |
| ENSMUSG00000048747 | 1,17E+00  | -3,14612376  | 6,40E-01 | 4,24E-01 | 7,18E-01 | E130114P18Rik | 2,26 | No  |
| ENSMUSG00000048752 | -4,13E-02 | -3,033659495 | 7,08E-04 | 9,79E-01 | 1,00E+00 | Prss50        | 0,97 | No  |
| ENSMUSG00000048755 | 1,46E-01  | 3,729322848  | 2,47E+00 | 1,16E-01 | 4,21E-01 | Mcat          | 1,11 | No  |
| ENSMUSG00000048756 | -1,09E-02 | 6,50439061   | 3,04E-02 | 8,61E-01 | 9,96E-01 | Foxo3         | 0,99 | No  |
| ENSMUSG00000048758 | -8,14E-02 | 7,884026866  | 1,94E+00 | 1,64E-01 | 5,15E-01 | Rpl29         | 0,95 | No  |
| ENSMUSG00000048763 | -2,46E-01 | -0,541684301 | 4,57E-01 | 4,99E-01 | 7,84E-01 | Hoxb3         | 0,84 | No  |
| ENSMUSG00000048772 | -5,97E-02 | 1,334460657  | 1,04E-01 | 7,47E-01 | 9,30E-01 | Tmem53        | 0,96 | No  |
| ENSMUSG00000048775 | 1,81E+00  | -3,10765737  | 1,28E+00 | 2,58E-01 | 5,50E-01 | Serpib13      | 3,49 | No  |

|                    |           |              |           |          |          |               |      |     |
|--------------------|-----------|--------------|-----------|----------|----------|---------------|------|-----|
| ENSMUSG00000048779 | 5,43E-01  | 6,940511121  | 7,87E+01  | 7,16E-19 | 1,49E-16 | P2ry6         | 1,46 | Yes |
| ENSMUSG00000048782 | 9,01E-03  | -3,107646452 | -5,16E-10 | 1,00E+00 | 1,00E+00 | Insc          | 1,01 | No  |
| ENSMUSG00000048787 | 1,48E-01  | 4,074162195  | 2,79E+00  | 9,49E-02 | 3,86E-01 | Dcun1d3       | 1,11 | No  |
| ENSMUSG00000048794 | 2,34E-01  | -0,102989671 | 6,07E-01  | 4,36E-01 | 7,29E-01 | Cfap100       | 1,18 | No  |
| ENSMUSG00000048796 | -5,44E-02 | 4,983964477  | 5,36E-01  | 4,64E-01 | 7,53E-01 | Cyb561d1      | 0,96 | No  |
| ENSMUSG00000048799 | 1,01E-02  | 5,662495548  | 2,24E-02  | 8,81E-01 | 1,00E+00 | Cep120        | 1,01 | No  |
| ENSMUSG00000048806 | 7,43E-01  | -2,896145754 | 3,01E-01  | 5,83E-01 | 8,38E-01 | Ifnb1         | 1,67 | No  |
| ENSMUSG00000048807 | 1,55E-01  | 4,797811052  | 4,08E+00  | 4,34E-02 | 2,48E-01 | Slc35e4       | 1,11 | No  |
| ENSMUSG00000048824 | -5,61E-01 | -2,448613537 | 2,47E-01  | 6,19E-01 | 8,56E-01 | Gm568         | 0,68 | No  |
| ENSMUSG00000048826 | -6,81E-01 | -0,344379317 | 4,62E+00  | 3,15E-02 | 2,06E-01 | Dact2         | 0,62 | No  |
| ENSMUSG00000048827 | -1,21E-02 | 3,317693171  | 1,34E-02  | 9,08E-01 | 1,00E+00 | Pkd1l3        | 0,99 | No  |
| ENSMUSG00000048832 | 8,21E-02  | 5,169143366  | 1,31E+00  | 2,53E-01 | 5,50E-01 | Vps37c        | 1,06 | No  |
| ENSMUSG00000048833 | 1,10E-01  | 6,051616977  | 2,88E+00  | 8,96E-02 | 3,80E-01 | Slc39a9       | 1,08 | No  |
| ENSMUSG00000048834 | 2,71E-01  | -2,548181248 | 7,47E-02  | 7,85E-01 | 9,51E-01 | Vstm2a        | 1,21 | No  |
| ENSMUSG00000048852 | 2,20E-01  | 1,096109296  | 1,23E+00  | 2,67E-01 | 5,64E-01 | Gm12185       | 1,16 | No  |
| ENSMUSG00000048856 | -4,93E-01 | 0,545378755  | 4,41E+00  | 3,58E-02 | 2,24E-01 | Slc25a47      | 0,71 | No  |
| ENSMUSG00000048865 | -1,25E-01 | 8,646993554  | 4,80E+00  | 2,85E-02 | 1,91E-01 | Arhgap30      | 0,92 | No  |
| ENSMUSG00000048874 | 6,53E-02  | 6,599793459  | 1,11E+00  | 2,93E-01 | 5,88E-01 | Phf3          | 1,05 | No  |
| ENSMUSG00000048878 | -1,84E-02 | 5,468591691  | 7,05E-02  | 7,91E-01 | 9,55E-01 | Hexim1        | 0,99 | No  |
| ENSMUSG00000048895 | -2,59E-01 | 1,81188105   | 2,84E+00  | 9,22E-02 | 3,82E-01 | Cdk5r1        | 0,84 | No  |
| ENSMUSG00000048897 | 2,62E-01  | 7,036687738  | 1,87E+01  | 1,50E-05 | 4,78E-04 | Zfp710        | 1,20 | Yes |
| ENSMUSG00000048899 | -1,11E-01 | -2,832003778 | 8,58E-03  | 9,26E-01 | 1,00E+00 | Rimkla        | 0,93 | No  |
| ENSMUSG00000048905 | -4,12E-01 | -1,669271814 | 4,82E-01  | 4,88E-01 | 7,75E-01 | 4930539E08Rik | 0,75 | No  |
| ENSMUSG00000048911 | -2,39E-01 | 5,195936369  | 1,08E+01  | 1,02E-03 | 1,64E-02 | Rnf24         | 0,85 | Yes |
| ENSMUSG00000048915 | 2,64E-01  | 0,757987486  | 1,32E+00  | 2,51E-01 | 5,50E-01 | Efna5         | 1,20 | No  |
| ENSMUSG00000048916 | -2,95E-01 | 2,890552667  | 6,40E+00  | 1,14E-02 | 1,03E-01 | Gm5540        | 0,82 | No  |
| ENSMUSG00000048920 | 1,08E-02  | 5,268853655  | 2,30E-02  | 8,79E-01 | 1,00E+00 | Fkrp          | 1,01 | No  |
| ENSMUSG00000048921 | -6,82E-02 | 1,640219443  | 1,70E-01  | 6,81E-01 | 8,93E-01 | Zfp689        | 0,95 | No  |
| ENSMUSG00000048922 | 2,70E-01  | 4,521086192  | 1,14E+01  | 7,18E-04 | 1,23E-02 | Cdca2         | 1,21 | Yes |
| ENSMUSG00000048924 | -1,84E-02 | 3,116827757  | 2,83E-02  | 8,66E-01 | 9,99E-01 | Ccdc125       | 0,99 | No  |
| ENSMUSG00000048930 | 3,91E-02  | 4,595187675  | 2,46E-01  | 6,20E-01 | 8,57E-01 | Tada3         | 1,03 | No  |
| ENSMUSG00000048939 | -1,94E+00 | -3,107619243 | 1,50E+00  | 2,21E-01 | 5,50E-01 | Atp13a5       | 0,26 | No  |

|                    |           |              |           |          |          |           |      |     |
|--------------------|-----------|--------------|-----------|----------|----------|-----------|------|-----|
| ENSMUSG00000048960 | 1,12E+00  | -2,574241512 | 1,20E+00  | 2,73E-01 | 5,69E-01 | Prex2     | 2,18 | No  |
| ENSMUSG00000048965 | 1,82E-01  | 3,221192897  | 2,99E+00  | 8,36E-02 | 3,71E-01 | Mrgpre    | 1,13 | No  |
| ENSMUSG00000048967 | -3,40E-01 | 0,01220383   | 1,34E+00  | 2,47E-01 | 5,50E-01 | Yjefn3    | 0,79 | No  |
| ENSMUSG00000048982 | -2,65E+00 | -3,033633091 | 2,78E+00  | 9,55E-02 | 3,86E-01 | Gphb5     | 0,16 | No  |
| ENSMUSG00000048988 | -7,93E-02 | -2,185690108 | 1,17E-02  | 9,14E-01 | 1,00E+00 | Elfn1     | 0,95 | No  |
| ENSMUSG00000048996 | 1,85E+00  | -3,107657832 | 1,35E+00  | 2,46E-01 | 5,50E-01 | Olfr1366  | 3,61 | No  |
| ENSMUSG00000048997 | -3,21E-02 | 3,116421795  | 8,28E-02  | 7,74E-01 | 9,44E-01 | Atxn7l2   | 0,98 | No  |
| ENSMUSG00000049001 | -3,96E-01 | 2,669555747  | 1,11E+01  | 8,44E-04 | 1,41E-02 | Ndnf      | 0,76 | Yes |
| ENSMUSG00000049008 | 1,81E+00  | -3,10765737  | 1,28E+00  | 2,58E-01 | 5,50E-01 | BB014433  | 3,49 | No  |
| ENSMUSG00000049011 | 9,01E-03  | -3,107646452 | -5,16E-10 | 1,00E+00 | 1,00E+00 | Olfr729   | 1,01 | No  |
| ENSMUSG00000049018 | 1,81E+00  | -3,10765737  | 1,28E+00  | 2,58E-01 | 5,50E-01 | Olfr368   | 3,49 | No  |
| ENSMUSG00000049036 | -3,20E-02 | -2,832035763 | 6,53E-04  | 9,80E-01 | 1,00E+00 | Tmem121   | 0,98 | No  |
| ENSMUSG00000049037 | 2,69E-02  | 2,767692148  | 4,83E-02  | 8,26E-01 | 9,75E-01 | Clec4a1   | 1,02 | No  |
| ENSMUSG00000049038 | 4,57E-01  | -1,436713913 | 8,14E-01  | 3,67E-01 | 6,68E-01 | Mterf2    | 1,37 | No  |
| ENSMUSG00000049044 | -7,02E-01 | -2,146082103 | 8,39E-01  | 3,60E-01 | 6,61E-01 | Rapgef4   | 0,61 | No  |
| ENSMUSG00000049057 | 9,01E-03  | -3,107646452 | -5,16E-10 | 1,00E+00 | 1,00E+00 | Olfr1257  | 1,01 | No  |
| ENSMUSG00000049076 | 3,43E-02  | 7,205575082  | 3,26E-01  | 5,68E-01 | 8,30E-01 | Acap2     | 1,02 | No  |
| ENSMUSG00000049086 | -3,12E-01 | 4,206067759  | 1,36E+01  | 2,21E-04 | 4,72E-03 | Bmyc      | 0,81 | Yes |
| ENSMUSG00000049090 | 6,21E-02  | 5,944247885  | 8,90E-01  | 3,45E-01 | 6,46E-01 | Zadh2     | 1,04 | No  |
| ENSMUSG00000049091 | 2,10E-01  | 5,955125629  | 1,01E+01  | 1,47E-03 | 2,20E-02 | Sephs2    | 1,16 | Yes |
| ENSMUSG00000049092 | -1,07E+00 | -1,561065771 | 3,33E+00  | 6,79E-02 | 3,28E-01 | Gpr137c   | 0,48 | No  |
| ENSMUSG00000049093 | -6,64E-01 | 0,112060513  | 5,95E+00  | 1,47E-02 | 1,24E-01 | Il23r     | 0,63 | No  |
| ENSMUSG00000049097 | 1,52E-01  | -2,268152104 | 3,44E-02  | 8,53E-01 | 9,91E-01 | Ankrd34a  | 1,11 | No  |
| ENSMUSG00000049100 | -2,70E+00 | -3,033614577 | 2,89E+00  | 8,93E-02 | 3,79E-01 | Pcdh10    | 0,15 | No  |
| ENSMUSG00000049103 | 5,41E-01  | 9,286671702  | 9,04E+01  | 1,92E-21 | 5,00E-19 | Ccr2      | 1,45 | Yes |
| ENSMUSG00000049106 | -8,48E-02 | 5,617426727  | 1,56E+00  | 2,12E-01 | 5,50E-01 | Dcaf5     | 0,94 | No  |
| ENSMUSG00000049109 | 9,01E-03  | -3,107646452 | -5,16E-10 | 1,00E+00 | 1,00E+00 | Themis    | 1,01 | No  |
| ENSMUSG00000049112 | -1,33E+00 | -2,896140992 | 1,10E+00  | 2,93E-01 | 5,89E-01 | Oxtr      | 0,40 | No  |
| ENSMUSG00000049119 | 2,52E-01  | 1,445306354  | 1,88E+00  | 1,70E-01 | 5,26E-01 | Fam110b   | 1,19 | No  |
| ENSMUSG00000049123 | -7,32E-01 | 0,041183703  | 6,65E+00  | 9,93E-03 | 9,28E-02 | Catsperg2 | 0,60 | No  |
| ENSMUSG00000049124 | -1,36E-01 | 5,488675469  | 3,87E+00  | 4,93E-02 | 2,68E-01 | Gm8186    | 0,91 | No  |
| ENSMUSG00000049130 | -3,08E-01 | 4,065578747  | 1,16E+01  | 6,66E-04 | 1,16E-02 | C5ar1     | 0,81 | Yes |

|                    |           |              |           |          |          |           |      |     |
|--------------------|-----------|--------------|-----------|----------|----------|-----------|------|-----|
| ENSMUSG00000049134 | 9,29E-01  | -2,015758733 | 1,65E+00  | 1,99E-01 | 5,50E-01 | Nrap      | 1,90 | No  |
| ENSMUSG00000049152 | -5,49E-01 | -2,770571758 | 2,36E-01  | 6,27E-01 | 8,61E-01 | Ugt3a2    | 0,68 | No  |
| ENSMUSG00000049164 | 4,31E-02  | 5,0954889    | 3,47E-01  | 5,56E-01 | 8,21E-01 | Zfp518a   | 1,03 | No  |
| ENSMUSG00000049184 | -3,10E-01 | 2,429694023  | 5,78E+00  | 1,62E-02 | 1,32E-01 | Purg      | 0,81 | No  |
| ENSMUSG00000049225 | 2,00E-01  | 4,685215346  | 6,55E+00  | 1,05E-02 | 9,68E-02 | Pdp1      | 1,15 | No  |
| ENSMUSG00000049230 | -2,01E-02 | 3,666364069  | 4,49E-02  | 8,32E-01 | 9,78E-01 | Gm9833    | 0,99 | No  |
| ENSMUSG00000049231 | -2,78E-01 | 2,868234142  | 5,43E+00  | 1,98E-02 | 1,50E-01 | Gm12497   | 0,82 | No  |
| ENSMUSG00000049232 | 1,49E-02  | 4,468047982  | 3,39E-02  | 8,54E-01 | 9,92E-01 | Tigd2     | 1,01 | No  |
| ENSMUSG00000049233 | 3,54E-02  | 3,377003207  | 1,18E-01  | 7,31E-01 | 9,21E-01 | Apoo-ps   | 1,02 | No  |
| ENSMUSG00000049235 | 3,30E-02  | 3,836652772  | 1,27E-01  | 7,21E-01 | 9,16E-01 | Gm7324    | 1,02 | No  |
| ENSMUSG00000049241 | 5,58E-01  | -0,755613173 | 1,70E+00  | 1,92E-01 | 5,50E-01 | Hcar1     | 1,47 | No  |
| ENSMUSG00000049246 | -5,64E-02 | -2,770641569 | 2,85E-03  | 9,57E-01 | 1,00E+00 | Hspe1-ps2 | 0,96 | No  |
| ENSMUSG00000049252 | -1,14E-02 | -3,033635021 | 1,50E-05  | 9,97E-01 | 1,00E+00 | Lrp1b     | 0,99 | No  |
| ENSMUSG00000049265 | 7,90E-01  | -2,770673814 | 5,40E-01  | 4,62E-01 | 7,51E-01 | Kcnk3     | 1,73 | No  |
| ENSMUSG00000049280 | 9,01E-03  | -3,107646452 | -5,16E-10 | 1,00E+00 | 1,00E+00 | Olfr509   | 1,01 | No  |
| ENSMUSG00000049281 | -4,19E-03 | -0,755417479 | 9,69E-05  | 9,92E-01 | 1,00E+00 | Scn3b     | 1,00 | No  |
| ENSMUSG00000049285 | 3,08E-02  | 1,908825382  | 4,04E-02  | 8,41E-01 | 9,84E-01 | Mblac1    | 1,02 | No  |
| ENSMUSG00000049287 | 5,91E-02  | 3,123700818  | 3,04E-01  | 5,81E-01 | 8,37E-01 | Iba57     | 1,04 | No  |
| ENSMUSG00000049288 | -1,86E-01 | 3,849133426  | 4,09E+00  | 4,30E-02 | 2,47E-01 | Lix1l     | 0,88 | No  |
| ENSMUSG00000049291 | -1,94E+00 | -3,107619243 | 1,50E+00  | 2,21E-01 | 5,50E-01 | Prss38    | 0,26 | No  |
| ENSMUSG00000049295 | -2,88E-01 | 5,040497478  | 1,55E+01  | 8,17E-05 | 2,05E-03 | Zfp219    | 0,82 | Yes |
| ENSMUSG00000049299 | -5,03E-02 | 5,105462366  | 4,75E-01  | 4,91E-01 | 7,77E-01 | Trappc1   | 0,97 | No  |
| ENSMUSG00000049300 | 8,99E-02  | 4,197341891  | 1,09E+00  | 2,96E-01 | 5,92E-01 | Prmt6     | 1,06 | No  |
| ENSMUSG00000049303 | 7,41E-02  | -1,669051419 | 1,47E-02  | 9,03E-01 | 1,00E+00 | Syt12     | 1,05 | No  |
| ENSMUSG00000049305 | -4,43E-02 | 5,234720522  | 3,87E-01  | 5,34E-01 | 8,07E-01 | Ccdc71    | 0,97 | No  |
| ENSMUSG00000049307 | -2,85E-01 | 3,797426004  | 9,54E+00  | 2,01E-03 | 2,81E-02 | Fut4      | 0,82 | Yes |
| ENSMUSG00000049313 | -3,00E-01 | 5,978580833  | 2,07E+01  | 5,29E-06 | 1,90E-04 | Sorl1     | 0,81 | Yes |
| ENSMUSG00000049314 | -3,88E-03 | -3,03362684  | 4,02E-12  | 1,00E+00 | 1,00E+00 | Fbxw13    | 1,00 | No  |
| ENSMUSG00000049321 | 2,17E-01  | -1,800979483 | 1,21E-01  | 7,28E-01 | 9,20E-01 | Zfp2      | 1,16 | No  |
| ENSMUSG00000049323 | 9,23E-02  | 6,900825235  | 2,29E+00  | 1,30E-01 | 4,53E-01 | Smcr8     | 1,07 | No  |
| ENSMUSG00000049327 | 8,87E-03  | 6,724692346  | 2,07E-02  | 8,86E-01 | 1,00E+00 | Kmt5a     | 1,01 | No  |
| ENSMUSG00000049336 | -1,86E+00 | -2,963227946 | 1,40E+00  | 2,36E-01 | 5,50E-01 | Tenm2     | 0,28 | No  |

|                    |           |              |           |          |          |               |      |     |
|--------------------|-----------|--------------|-----------|----------|----------|---------------|------|-----|
| ENSMUSG00000049339 | 7,20E-02  | 6,412924317  | 1,30E+00  | 2,55E-01 | 5,50E-01 | Retreg2       | 1,05 | No  |
| ENSMUSG00000049350 | -1,94E+00 | -3,107619243 | 1,50E+00  | 2,21E-01 | 5,50E-01 | Zg16          | 0,26 | No  |
| ENSMUSG00000049353 | 4,15E-01  | -1,963284229 | 3,96E-01  | 5,29E-01 | 8,05E-01 | Rd3           | 1,33 | No  |
| ENSMUSG00000049354 | 9,55E-02  | 7,663091413  | 2,63E+00  | 1,05E-01 | 3,97E-01 | Dcaf7         | 1,07 | No  |
| ENSMUSG00000049357 | -9,47E-01 | -1,289482686 | 3,63E+00  | 5,67E-02 | 2,93E-01 | 4933408B17Rik | 0,52 | No  |
| ENSMUSG00000049362 | 1,81E-01  | 0,14417751   | 4,29E-01  | 5,13E-01 | 7,95E-01 | Olf173        | 1,13 | No  |
| ENSMUSG00000049382 | -3,83E-02 | -3,107651936 | -7,91E-11 | 1,00E+00 | 1,00E+00 | Krt8          | 0,97 | No  |
| ENSMUSG00000049396 | 3,16E-02  | 2,286022229  | 5,34E-02  | 8,17E-01 | 9,70E-01 | Gemin4        | 1,02 | No  |
| ENSMUSG00000049401 | -4,20E-02 | 6,385674986  | 4,42E-01  | 5,06E-01 | 7,91E-01 | Ogfr          | 0,97 | No  |
| ENSMUSG00000049404 | 4,03E-01  | 1,045030025  | 3,86E+00  | 4,96E-02 | 2,69E-01 | Rarres1       | 1,32 | No  |
| ENSMUSG00000049409 | 3,61E-01  | 0,508451167  | 2,16E+00  | 1,41E-01 | 4,75E-01 | Prokr1        | 1,28 | No  |
| ENSMUSG00000049411 | 1,84E-01  | 3,071768483  | 2,75E+00  | 9,71E-02 | 3,89E-01 | Tmem241       | 1,14 | No  |
| ENSMUSG00000049414 | 2,28E-01  | 2,262474044  | 2,67E+00  | 1,02E-01 | 3,94E-01 | Gm5417        | 1,17 | No  |
| ENSMUSG00000049420 | 9,01E-03  | -3,107646452 | -5,16E-10 | 1,00E+00 | 1,00E+00 | Tmem200a      | 1,01 | No  |
| ENSMUSG00000049421 | 8,09E-02  | 4,381890366  | 9,96E-01  | 3,18E-01 | 6,19E-01 | Zfp260        | 1,06 | No  |
| ENSMUSG00000049422 | 1,74E-01  | 4,405781742  | 4,46E+00  | 3,46E-02 | 2,19E-01 | Chchd10       | 1,13 | No  |
| ENSMUSG00000049436 | 7,44E-01  | -2,963286135 | 3,02E-01  | 5,83E-01 | 8,38E-01 | Upk1b         | 1,67 | No  |
| ENSMUSG00000049439 | 1,67E-01  | 4,237657739  | 3,86E+00  | 4,94E-02 | 2,68E-01 | Cyp20a1       | 1,12 | No  |
| ENSMUSG00000049460 | 1,24E-01  | 3,533595518  | 1,58E+00  | 2,08E-01 | 5,50E-01 | Gm8396        | 1,09 | No  |
| ENSMUSG00000049470 | 2,10E-02  | 7,413832733  | 1,24E-01  | 7,25E-01 | 9,18E-01 | Aff4          | 1,01 | No  |
| ENSMUSG00000049476 | 1,81E+00  | -3,10765737  | 1,28E+00  | 2,58E-01 | 5,50E-01 | 1700104B16Rik | 3,49 | No  |
| ENSMUSG00000049477 | -1,15E-03 | 3,259313039  | 1,16E-04  | 9,91E-01 | 1,00E+00 | Gm8508        | 1,00 | No  |
| ENSMUSG00000049482 | 4,57E-02  | 5,565877377  | 4,44E-01  | 5,05E-01 | 7,90E-01 | Ctu2          | 1,03 | No  |
| ENSMUSG00000049488 | 1,88E-01  | 2,50629894   | 2,15E+00  | 1,43E-01 | 4,77E-01 | Tmem67        | 1,14 | No  |
| ENSMUSG00000049489 | -9,03E-02 | 3,522593957  | 8,17E-01  | 3,66E-01 | 6,67E-01 | Fam58b        | 0,94 | No  |
| ENSMUSG00000049491 | 4,50E-02  | -0,079382797 | 2,28E-02  | 8,80E-01 | 1,00E+00 | Slc36a3       | 1,03 | No  |
| ENSMUSG00000049493 | -2,75E+00 | -2,896112716 | 2,99E+00  | 8,38E-02 | 3,71E-01 | Pls1          | 0,15 | No  |
| ENSMUSG00000049502 | -1,51E-01 | 5,961723037  | 5,41E+00  | 2,00E-02 | 1,51E-01 | Dtx3l         | 0,90 | No  |
| ENSMUSG00000049504 | 1,01E-01  | 5,684427618  | 2,22E+00  | 1,36E-01 | 4,65E-01 | Proser1       | 1,07 | No  |
| ENSMUSG00000049515 | 1,03E+00  | -2,226369022 | 1,71E+00  | 1,91E-01 | 5,50E-01 | Espnl         | 2,04 | No  |
| ENSMUSG00000049516 | -1,95E-03 | 5,943117675  | 8,76E-04  | 9,76E-01 | 1,00E+00 | Spty2d1       | 1,00 | No  |
| ENSMUSG00000049517 | -2,19E-01 | 5,359486421  | 9,69E+00  | 1,85E-03 | 2,64E-02 | Rps23         | 0,86 | Yes |

|                    |           |              |          |          |          |               |      |     |
|--------------------|-----------|--------------|----------|----------|----------|---------------|------|-----|
| ENSMUSG00000049521 | 1,85E+00  | -3,107657832 | 1,35E+00 | 2,46E-01 | 5,50E-01 | Cdc42ep1      | 3,61 | No  |
| ENSMUSG00000049526 | 2,26E-01  | 4,965203573  | 9,09E+00 | 2,57E-03 | 3,40E-02 | Tmem202       | 1,17 | Yes |
| ENSMUSG00000049532 | 4,05E-01  | 3,043421902  | 1,31E+01 | 3,02E-04 | 6,09E-03 | Sall2         | 1,32 | Yes |
| ENSMUSG00000049539 | -1,20E-01 | -0,627700794 | 1,18E-01 | 7,31E-01 | 9,21E-01 | Hist1h1a      | 0,92 | No  |
| ENSMUSG00000049550 | -6,92E-02 | 6,090368898  | 1,14E+00 | 2,86E-01 | 5,82E-01 | Clip1         | 0,95 | No  |
| ENSMUSG00000049551 | -1,36E+00 | -2,896086315 | 1,16E+00 | 2,81E-01 | 5,78E-01 | Fzd9          | 0,39 | No  |
| ENSMUSG00000049553 | 1,08E-01  | 5,589621959  | 2,48E+00 | 1,15E-01 | 4,19E-01 | Polr1a        | 1,08 | No  |
| ENSMUSG00000049555 | -5,76E-01 | 0,132372774  | 4,52E+00 | 3,36E-02 | 2,15E-01 | Tmie          | 0,67 | No  |
| ENSMUSG00000049556 | -1,23E+00 | -2,600691255 | 1,45E+00 | 2,29E-01 | 5,50E-01 | Lingo1        | 0,43 | No  |
| ENSMUSG00000049562 | 1,39E-01  | 4,737892322  | 3,25E+00 | 7,12E-02 | 3,38E-01 | Ap5b1         | 1,10 | No  |
| ENSMUSG00000049565 | -1,94E+00 | -3,107619243 | 1,50E+00 | 2,21E-01 | 5,50E-01 | Aknad1        | 0,26 | No  |
| ENSMUSG00000049571 | -3,95E-02 | -2,770627166 | 1,06E-03 | 9,74E-01 | 1,00E+00 | Cfap46        | 0,97 | No  |
| ENSMUSG00000049576 | -7,78E-04 | 1,511472287  | 1,96E-05 | 9,96E-01 | 1,00E+00 | Zfa-ps        | 1,00 | No  |
| ENSMUSG00000049577 | 8,54E-02  | 3,337029024  | 6,60E-01 | 4,17E-01 | 7,12E-01 | Zfpm1         | 1,06 | No  |
| ENSMUSG00000049580 | 1,48E-02  | 3,295686972  | 2,03E-02 | 8,87E-01 | 1,00E+00 | Tsku          | 1,01 | No  |
| ENSMUSG00000049583 | 1,87E+00  | -3,107639691 | 1,38E+00 | 2,40E-01 | 5,50E-01 | Grm5          | 3,67 | No  |
| ENSMUSG00000049588 | 1,25E-01  | 3,105577077  | 1,30E+00 | 2,53E-01 | 5,50E-01 | Ccdc69        | 1,09 | No  |
| ENSMUSG00000049598 | -8,34E-01 | 0,477827597  | 1,17E+01 | 6,29E-04 | 1,11E-02 | Vsig8         | 0,56 | Yes |
| ENSMUSG00000049600 | 1,47E-01  | 4,346277313  | 3,20E+00 | 7,36E-02 | 3,45E-01 | Zbtb45        | 1,11 | No  |
| ENSMUSG00000049604 | 1,85E+00  | -3,107657832 | 1,35E+00 | 2,46E-01 | 5,50E-01 | Hoxb13        | 3,61 | No  |
| ENSMUSG00000049606 | -2,05E-02 | 4,731404056  | 7,13E-02 | 7,89E-01 | 9,54E-01 | Zfp644        | 0,99 | No  |
| ENSMUSG00000049608 | -4,12E-01 | 4,428172498  | 2,66E+01 | 2,54E-07 | 1,30E-05 | Gpr55         | 0,75 | Yes |
| ENSMUSG00000049612 | -5,49E-01 | -0,596142245 | 2,23E+00 | 1,35E-01 | 4,63E-01 | Omg           | 0,68 | No  |
| ENSMUSG00000049620 | -1,94E+00 | -3,107619243 | 1,50E+00 | 2,21E-01 | 5,50E-01 | Prss33        | 0,26 | No  |
| ENSMUSG00000049624 | 1,42E-01  | 5,229654406  | 3,90E+00 | 4,84E-02 | 2,64E-01 | Slc17a5       | 1,10 | No  |
| ENSMUSG00000049625 | 3,35E-01  | 7,788391894  | 3,26E+01 | 1,16E-08 | 8,00E-07 | Tifab         | 1,26 | Yes |
| ENSMUSG00000049630 | -1,90E-01 | -1,72628322  | 1,05E-01 | 7,46E-01 | 9,29E-01 | C1ql3         | 0,88 | No  |
| ENSMUSG00000049643 | 8,44E-02  | 4,807514339  | 1,22E+00 | 2,69E-01 | 5,65E-01 | Z310022A10Rik | 1,06 | No  |
| ENSMUSG00000049648 | -1,87E+00 | -3,107637761 | 1,39E+00 | 2,38E-01 | 5,50E-01 | Olfir273      | 0,27 | No  |
| ENSMUSG00000049649 | 4,57E-01  | -0,529040222 | 1,48E+00 | 2,24E-01 | 5,50E-01 | Gpr3          | 1,37 | No  |
| ENSMUSG00000049653 | 3,05E-02  | -2,247052239 | 1,56E-03 | 9,69E-01 | 1,00E+00 | Spatc1        | 1,02 | No  |
| ENSMUSG00000049657 | 3,47E-01  | 3,761860196  | 1,42E+01 | 1,65E-04 | 3,69E-03 | Zbtb5         | 1,27 | Yes |

|                    |           |              |          |          |          |               |      |     |
|--------------------|-----------|--------------|----------|----------|----------|---------------|------|-----|
| ENSMUSG00000049658 | 9,48E-02  | 5,980750694  | 2,08E+00 | 1,49E-01 | 4,90E-01 | Bdp1          | 1,07 | No  |
| ENSMUSG00000049659 | -1,80E-01 | 6,914762527  | 8,73E+00 | 3,14E-03 | 3,96E-02 | Aftph         | 0,88 | Yes |
| ENSMUSG00000049670 | -1,73E-01 | 1,221735889  | 7,81E-01 | 3,77E-01 | 6,78E-01 | Morn4         | 0,89 | No  |
| ENSMUSG00000049672 | 1,79E-02  | 4,160070271  | 4,45E-02 | 8,33E-01 | 9,78E-01 | Zbtb14        | 1,01 | No  |
| ENSMUSG00000049676 | -3,57E-01 | 3,428801366  | 1,32E+01 | 2,81E-04 | 5,75E-03 | Catsperg1     | 0,78 | Yes |
| ENSMUSG00000049680 | 1,39E-01  | 5,339894685  | 3,88E+00 | 4,89E-02 | 2,66E-01 | Urgcp         | 1,10 | No  |
| ENSMUSG00000049686 | 1,28E-01  | 6,728185725  | 4,28E+00 | 3,86E-02 | 2,33E-01 | Orai1         | 1,09 | No  |
| ENSMUSG00000049687 | 7,86E-01  | 0,612907944  | 1,10E+01 | 9,09E-04 | 1,50E-02 | Fam109b       | 1,72 | Yes |
| ENSMUSG00000049690 | -9,00E-01 | -1,627624142 | 3,01E+00 | 8,29E-02 | 3,70E-01 | Nckap5        | 0,54 | No  |
| ENSMUSG00000049692 | 4,82E-03  | -1,740889391 | 6,09E-05 | 9,94E-01 | 1,00E+00 | Tmem239       | 1,00 | No  |
| ENSMUSG00000049694 | 1,86E+00  | -3,033661846 | 1,35E+00 | 2,46E-01 | 5,50E-01 | BC048671      | 3,62 | No  |
| ENSMUSG00000049699 | 1,22E+00  | -2,655160971 | 9,20E-01 | 3,37E-01 | 6,38E-01 | Ucn2          | 2,33 | No  |
| ENSMUSG00000049709 | 2,37E-01  | 3,286107278  | 5,05E+00 | 2,46E-02 | 1,73E-01 | Nlrp10        | 1,18 | No  |
| ENSMUSG00000049717 | 2,33E-01  | 2,133891355  | 2,80E+00 | 9,42E-02 | 3,84E-01 | Lig4          | 1,18 | No  |
| ENSMUSG00000049719 | -8,28E-01 | -2,070246351 | 1,00E+00 | 3,17E-01 | 6,18E-01 | Prss46        | 0,56 | No  |
| ENSMUSG00000049721 | -5,58E-01 | -0,401199615 | 2,64E+00 | 1,04E-01 | 3,97E-01 | Gal3st1       | 0,68 | No  |
| ENSMUSG00000049723 | 2,21E-01  | 13,05380738  | 1,57E+01 | 7,27E-05 | 1,86E-03 | Mmp12         | 1,17 | Yes |
| ENSMUSG00000049728 | 1,06E-01  | 3,654820511  | 1,25E+00 | 2,64E-01 | 5,59E-01 | Zfp668        | 1,08 | No  |
| ENSMUSG00000049734 | -7,95E-02 | 4,374403717  | 9,56E-01 | 3,28E-01 | 6,29E-01 | Trex1         | 0,95 | No  |
| ENSMUSG00000049739 | 8,93E-02  | 5,715260066  | 1,77E+00 | 1,84E-01 | 5,47E-01 | Zfp646        | 1,06 | No  |
| ENSMUSG00000049740 | -1,89E+00 | -3,070168098 | 1,43E+00 | 2,33E-01 | 5,50E-01 | 5330417H12Rik | 0,27 | No  |
| ENSMUSG00000049741 | -1,87E+00 | -2,963257051 | 1,41E+00 | 2,35E-01 | 5,50E-01 | Rxfp4         | 0,27 | No  |
| ENSMUSG00000049744 | 3,19E-01  | 4,52723304   | 1,56E+01 | 8,03E-05 | 2,02E-03 | Arhgap15      | 1,25 | Yes |
| ENSMUSG00000049751 | -9,35E-02 | 5,307429442  | 1,73E+00 | 1,88E-01 | 5,50E-01 | Rpl36al       | 0,94 | No  |
| ENSMUSG00000049755 | 3,32E-02  | 3,799128594  | 1,34E-01 | 7,14E-01 | 9,12E-01 | Zfp672        | 1,02 | No  |
| ENSMUSG00000049758 | -2,63E-02 | -3,033653157 | 2,33E-04 | 9,88E-01 | 1,00E+00 | Olfr1318      | 0,98 | No  |
| ENSMUSG00000049760 | -7,71E-02 | 5,031058935  | 1,10E+00 | 2,95E-01 | 5,91E-01 | 2410015M20Rik | 0,95 | No  |
| ENSMUSG00000049764 | -4,20E-01 | 4,337560283  | 2,60E+01 | 3,45E-07 | 1,70E-05 | Zfp280b       | 0,75 | Yes |
| ENSMUSG00000049791 | 5,26E-01  | 2,81362729   | 1,91E+01 | 1,26E-05 | 4,12E-04 | Fzd4          | 1,44 | Yes |
| ENSMUSG00000049792 | 5,95E-02  | 4,378096047  | 5,25E-01 | 4,69E-01 | 7,57E-01 | Bag5          | 1,04 | No  |
| ENSMUSG00000049797 | 1,89E+00  | -3,033614598 | 1,38E+00 | 2,40E-01 | 5,50E-01 | Olfr642       | 3,70 | No  |
| ENSMUSG00000049799 | 3,96E-01  | -2,226371346 | 2,50E-01 | 6,17E-01 | 8,55E-01 | Lrrc19        | 1,32 | No  |



|                    |           |              |          |          |          |               |      |     |
|--------------------|-----------|--------------|----------|----------|----------|---------------|------|-----|
| ENSMUSG00000049800 | 1,33E-01  | 6,232100491  | 4,28E+00 | 3,86E-02 | 2,33E-01 | Sertad2       | 1,10 | No  |
| ENSMUSG00000049807 | 2,69E-01  | 4,770695801  | 1,21E+01 | 5,12E-04 | 9,35E-03 | Arhgap23      | 1,21 | Yes |
| ENSMUSG00000049811 | -1,13E-01 | 1,828936847  | 5,32E-01 | 4,66E-01 | 7,54E-01 | Fam161a       | 0,92 | No  |
| ENSMUSG00000049823 | -1,39E-01 | 2,304407906  | 1,05E+00 | 3,06E-01 | 6,03E-01 | Zbtb12        | 0,91 | No  |
| ENSMUSG00000049832 | -8,95E-02 | 5,772850966  | 1,79E+00 | 1,81E-01 | 5,43E-01 | Rbx1-ps       | 0,94 | No  |
| ENSMUSG00000049848 | 5,64E-02  | 0,412418103  | 4,64E-02 | 8,29E-01 | 9,77E-01 | Ceacam19      | 1,04 | No  |
| ENSMUSG00000049858 | -3,51E-01 | 4,697176637  | 2,11E+01 | 4,41E-06 | 1,62E-04 | Suox          | 0,78 | Yes |
| ENSMUSG00000049866 | -6,61E-03 | 8,531907405  | 1,32E-02 | 9,08E-01 | 1,00E+00 | Arl4c         | 1,00 | No  |
| ENSMUSG00000049871 | 6,23E-02  | 1,607215276  | 1,33E-01 | 7,16E-01 | 9,13E-01 | Nlrc3         | 1,04 | No  |
| ENSMUSG00000049872 | -9,26E-01 | -1,896015668 | 2,11E+00 | 1,46E-01 | 4,84E-01 | Fam26e        | 0,53 | No  |
| ENSMUSG00000049878 | 1,62E-02  | 5,789021922  | 5,81E-02 | 8,10E-01 | 9,65E-01 | Rlf           | 1,01 | No  |
| ENSMUSG00000049881 | -6,32E-02 | 3,237687008  | 3,58E-01 | 5,49E-01 | 8,17E-01 | 2810025M15Rik | 0,96 | No  |
| ENSMUSG00000049882 | -1,69E-02 | 2,860398124  | 2,09E-02 | 8,85E-01 | 1,00E+00 | Vcpkmt        | 0,99 | No  |
| ENSMUSG00000049891 | 1,01E-01  | 4,744845426  | 1,69E+00 | 1,93E-01 | 5,50E-01 | Gm7984        | 1,07 | No  |
| ENSMUSG00000049892 | -4,52E-02 | 0,087414656  | 2,70E-02 | 8,70E-01 | 1,00E+00 | Rasd1         | 0,97 | No  |
| ENSMUSG00000049897 | 4,44E-02  | 1,465890531  | 6,59E-02 | 7,97E-01 | 9,58E-01 | Stkld1        | 1,03 | No  |
| ENSMUSG00000049902 | -4,80E-02 | -2,896135597 | 1,06E-03 | 9,74E-01 | 1,00E+00 | 4921517D22Rik | 0,97 | No  |
| ENSMUSG00000049904 | -7,41E-02 | 0,229764835  | 7,30E-02 | 7,87E-01 | 9,53E-01 | Tmem17        | 0,95 | No  |
| ENSMUSG00000049907 | 6,29E-01  | -0,024847805 | 4,51E+00 | 3,36E-02 | 2,15E-01 | Rasl11b       | 1,55 | No  |
| ENSMUSG00000049908 | -3,86E+00 | -2,71163588  | 7,12E+00 | 7,64E-03 | 7,65E-02 | Gja8          | 0,07 | No  |
| ENSMUSG00000049916 | -3,15E-02 | 1,726413904  | 3,67E-02 | 8,48E-01 | 9,88E-01 | 2610318N02Rik | 0,98 | No  |
| ENSMUSG00000049922 | 2,20E-01  | 6,387668351  | 1,20E+01 | 5,20E-04 | 9,47E-03 | Slc35c1       | 1,16 | Yes |
| ENSMUSG00000049926 | 7,45E-01  | -2,770594121 | 3,02E-01 | 5,83E-01 | 8,38E-01 | Olfir921      | 1,68 | No  |
| ENSMUSG00000049928 | 1,73E-01  | 1,021227607  | 6,72E-01 | 4,12E-01 | 7,08E-01 | Glp2r         | 1,13 | No  |
| ENSMUSG00000049932 | 1,45E-01  | 5,904481213  | 4,76E+00 | 2,92E-02 | 1,94E-01 | H2afx         | 1,11 | No  |
| ENSMUSG00000049939 | -2,05E+00 | -1,448470775 | 9,13E+00 | 2,51E-03 | 3,34E-02 | Lrrc4         | 0,24 | Yes |
| ENSMUSG00000049940 | 2,20E-02  | 5,463257425  | 1,01E-01 | 7,51E-01 | 9,32E-01 | Pgrmc2        | 1,02 | No  |
| ENSMUSG00000049950 | 1,11E-01  | 1,146535533  | 3,34E-01 | 5,63E-01 | 8,26E-01 | Rpp38         | 1,08 | No  |
| ENSMUSG00000049957 | 2,22E-01  | 3,307333356  | 4,67E+00 | 3,07E-02 | 2,02E-01 | Ccdc137       | 1,17 | No  |
| ENSMUSG00000049960 | -1,32E-01 | 4,68465877   | 2,86E+00 | 9,08E-02 | 3,82E-01 | Mrps16        | 0,91 | No  |
| ENSMUSG00000049969 | 8,06E-02  | 6,178452985  | 1,57E+00 | 2,10E-01 | 5,50E-01 | Plekhf2       | 1,06 | No  |
| ENSMUSG00000049971 | -8,75E-01 | -1,600617882 | 2,34E+00 | 1,26E-01 | 4,45E-01 | Glt1d1        | 0,55 | No  |

|                    |           |              |          |          |          |               |      |     |
|--------------------|-----------|--------------|----------|----------|----------|---------------|------|-----|
| ENSMUSG00000049985 | -8,09E-02 | 2,682676004  | 4,50E-01 | 5,02E-01 | 7,87E-01 | Ankrd55       | 0,95 | No  |
| ENSMUSG00000049988 | 1,02E-01  | 6,504343531  | 2,61E+00 | 1,06E-01 | 3,99E-01 | Lrrc25        | 1,07 | No  |
| ENSMUSG00000049999 | 2,79E-01  | 4,261221521  | 1,04E+01 | 1,29E-03 | 1,98E-02 | Ppp1r3d       | 1,21 | Yes |
| ENSMUSG00000050002 | -8,50E-02 | 4,640097424  | 1,18E+00 | 2,77E-01 | 5,74E-01 | Idnk          | 0,94 | No  |
| ENSMUSG00000050010 | 3,97E-01  | 0,744945328  | 2,88E+00 | 8,96E-02 | 3,80E-01 | Shisa3        | 1,32 | No  |
| ENSMUSG00000050014 | -2,03E+00 | -1,424745115 | 1,46E+01 | 1,36E-04 | 3,12E-03 | Apol10b       | 0,25 | Yes |
| ENSMUSG00000050017 | 5,84E-02  | 5,729194032  | 7,49E-01 | 3,87E-01 | 6,87E-01 | Pitpnb        | 1,04 | No  |
| ENSMUSG00000050022 | 2,31E-01  | 7,266622421  | 1,49E+01 | 1,15E-04 | 2,73E-03 | Amz1          | 1,17 | Yes |
| ENSMUSG00000050030 | -1,94E+00 | -3,107619243 | 1,50E+00 | 2,21E-01 | 5,50E-01 | Olfr728       | 0,26 | No  |
| ENSMUSG00000050035 | 6,15E-02  | -1,683224165 | 9,25E-03 | 9,23E-01 | 1,00E+00 | Fhl4          | 1,04 | No  |
| ENSMUSG00000050043 | 3,03E-02  | 4,908130396  | 1,63E-01 | 6,86E-01 | 8,97E-01 | Tmx2          | 1,02 | No  |
| ENSMUSG00000050050 | -4,54E-01 | -0,436655929 | 1,96E+00 | 1,61E-01 | 5,10E-01 | Ccdc158       | 0,73 | No  |
| ENSMUSG00000050058 | -3,88E-03 | -3,03362684  | 4,02E-12 | 1,00E+00 | 1,00E+00 | Prm3          | 1,00 | No  |
| ENSMUSG00000050063 | -1,89E+00 | -3,033648118 | 1,42E+00 | 2,33E-01 | 5,50E-01 | Klk6          | 0,27 | No  |
| ENSMUSG00000050064 | 9,07E-01  | -1,165840765 | 3,18E+00 | 7,45E-02 | 3,47E-01 | Zfp697        | 1,88 | No  |
| ENSMUSG00000050069 | -2,70E+00 | -2,896096643 | 2,88E+00 | 8,95E-02 | 3,79E-01 | Grem2         | 0,15 | No  |
| ENSMUSG00000050075 | 3,40E-01  | 6,666800485  | 2,99E+01 | 4,51E-08 | 2,73E-06 | Gpr171        | 1,27 | Yes |
| ENSMUSG00000050079 | -1,18E-01 | 5,669701453  | 3,06E+00 | 8,04E-02 | 3,63E-01 | Rspry1        | 0,92 | No  |
| ENSMUSG00000050087 | 7,56E-01  | -2,963268003 | 3,13E-01 | 5,76E-01 | 8,34E-01 | Cby3          | 1,69 | No  |
| ENSMUSG00000050088 | 9,30E-02  | 5,181677954  | 1,67E+00 | 1,97E-01 | 5,50E-01 | 1600012H06Rik | 1,07 | No  |
| ENSMUSG00000050097 | 8,26E-01  | -2,711748546 | 5,94E-01 | 4,41E-01 | 7,33E-01 | Ces2b         | 1,77 | No  |
| ENSMUSG00000050100 | -8,40E-01 | -2,832005894 | 3,87E-01 | 5,34E-01 | 8,07E-01 | Hmx2          | 0,56 | No  |
| ENSMUSG00000050103 | -2,19E-01 | -0,070310226 | 5,44E-01 | 4,61E-01 | 7,49E-01 | Agmo          | 0,86 | No  |
| ENSMUSG00000050106 | -2,82E-01 | 3,429210567  | 7,81E+00 | 5,20E-03 | 5,75E-02 | Tmc8          | 0,82 | No  |
| ENSMUSG00000050107 | 2,44E-01  | 4,71229645   | 9,94E+00 | 1,61E-03 | 2,36E-02 | Haspin        | 1,18 | Yes |
| ENSMUSG00000050108 | 3,42E-01  | 1,461306856  | 3,58E+00 | 5,86E-02 | 2,99E-01 | Bpifc         | 1,27 | No  |
| ENSMUSG00000050114 | -1,18E-02 | 3,457419689  | 1,38E-02 | 9,07E-01 | 1,00E+00 | Prdx6b        | 0,99 | No  |
| ENSMUSG00000050122 | -5,97E-01 | -1,088561662 | 1,89E+00 | 1,69E-01 | 5,24E-01 | Vwa3b         | 0,66 | No  |
| ENSMUSG00000050132 | 4,18E-01  | -1,770618847 | 5,23E-01 | 4,70E-01 | 7,58E-01 | Sarm1         | 1,34 | No  |
| ENSMUSG00000050138 | -8,40E-02 | -1,740861671 | 1,64E-02 | 8,98E-01 | 1,00E+00 | Kcnk12        | 0,94 | No  |
| ENSMUSG00000050144 | 1,15E-01  | 5,808381951  | 2,94E+00 | 8,65E-02 | 3,78E-01 | Slc25a44      | 1,08 | No  |
| ENSMUSG00000050147 | -5,95E-01 | -0,847679906 | 1,88E+00 | 1,71E-01 | 5,26E-01 | F2rl3         | 0,66 | No  |

|                    |           |              |          |          |          |               |      |     |
|--------------------|-----------|--------------|----------|----------|----------|---------------|------|-----|
| ENSMUSG00000050150 | -5,00E-01 | -1,863669567 | 6,07E-01 | 4,36E-01 | 7,29E-01 | Slc9b1        | 0,71 | No  |
| ENSMUSG00000050157 | -2,59E-01 | -0,824122753 | 3,82E-01 | 5,36E-01 | 8,08E-01 | Gm867         | 0,84 | No  |
| ENSMUSG00000050174 | 5,44E-02  | 1,264936393  | 8,13E-02 | 7,76E-01 | 9,45E-01 | Nudt6         | 1,04 | No  |
| ENSMUSG00000050179 | 1,87E+00  | -3,107639691 | 1,38E+00 | 2,40E-01 | 5,50E-01 | A930002I21Rik | 3,67 | No  |
| ENSMUSG00000050188 | 1,07E-01  | 4,191336142  | 1,57E+00 | 2,10E-01 | 5,50E-01 | Lsm10         | 1,08 | No  |
| ENSMUSG00000050189 | -8,94E-01 | -1,655044417 | 2,70E+00 | 1,00E-01 | 3,92E-01 | Etos1         | 0,54 | No  |
| ENSMUSG00000050192 | -1,91E-01 | 3,257584716  | 3,27E+00 | 7,06E-02 | 3,36E-01 | Eif5a2        | 0,88 | No  |
| ENSMUSG00000050195 | 5,88E-01  | 3,453696325  | 3,37E+01 | 6,47E-09 | 4,67E-07 | Scd4          | 1,50 | Yes |
| ENSMUSG00000050199 | -3,01E-01 | 0,747929472  | 1,81E+00 | 1,79E-01 | 5,39E-01 | Lgr4          | 0,81 | No  |
| ENSMUSG00000050212 | -2,26E-01 | 4,737153083  | 8,62E+00 | 3,32E-03 | 4,14E-02 | Eva1b         | 0,85 | Yes |
| ENSMUSG00000050213 | 1,92E-01  | 4,644903915  | 6,05E+00 | 1,39E-02 | 1,19E-01 | Snip1         | 1,14 | No  |
| ENSMUSG00000050222 | -3,16E-02 | -0,535339991 | 8,23E-03 | 9,28E-01 | 1,00E+00 | Il17d         | 0,98 | No  |
| ENSMUSG00000050229 | -7,08E-02 | 5,895460018  | 1,14E+00 | 2,85E-01 | 5,81E-01 | Pigm          | 0,95 | No  |
| ENSMUSG00000050234 | 7,45E-01  | -2,896140634 | 3,03E-01 | 5,82E-01 | 8,38E-01 | Gja4          | 1,68 | No  |
| ENSMUSG00000050240 | -1,02E-01 | 2,017510013  | 4,40E-01 | 5,07E-01 | 7,91E-01 | Hic2          | 0,93 | No  |
| ENSMUSG00000050241 | -6,03E-02 | -1,770504975 | 9,34E-03 | 9,23E-01 | 1,00E+00 | Klre1         | 0,96 | No  |
| ENSMUSG00000050243 | -2,19E-01 | 4,012264353  | 6,11E+00 | 1,35E-02 | 1,16E-01 | Gm5446        | 0,86 | No  |
| ENSMUSG00000050244 | 3,38E-01  | 6,666144476  | 2,94E+01 | 5,98E-08 | 3,49E-06 | Heatr1        | 1,26 | Yes |
| ENSMUSG00000050248 | -8,32E-01 | -2,896143825 | 3,80E-01 | 5,38E-01 | 8,09E-01 | Evc2          | 0,56 | No  |
| ENSMUSG00000050270 | -1,49E-02 | 1,195136727  | 6,10E-03 | 9,38E-01 | 1,00E+00 | Tmem220       | 0,99 | No  |
| ENSMUSG00000050271 | 2,57E-01  | 2,309473542  | 3,31E+00 | 6,87E-02 | 3,30E-01 | Prag1         | 1,19 | No  |
| ENSMUSG00000050272 | 3,57E-01  | 4,543114397  | 1,94E+01 | 1,04E-05 | 3,48E-04 | Dscam         | 1,28 | Yes |
| ENSMUSG00000050276 | -1,90E+00 | -2,770607626 | 1,44E+00 | 2,31E-01 | 5,50E-01 | Mrgprg        | 0,27 | No  |
| ENSMUSG00000050288 | 6,91E-01  | -2,26821868  | 6,91E-01 | 4,06E-01 | 7,02E-01 | Fzd2          | 1,61 | No  |
| ENSMUSG00000050295 | 3,18E-02  | -0,726217468 | 7,30E-03 | 9,32E-01 | 1,00E+00 | Foxc1         | 1,02 | No  |
| ENSMUSG00000050296 | 1,81E+00  | -3,10765737  | 1,28E+00 | 2,58E-01 | 5,50E-01 | Abca12        | 3,49 | No  |
| ENSMUSG00000050299 | -2,06E-01 | 9,272225373  | 1,32E+01 | 2,76E-04 | 5,67E-03 | Gm9843        | 0,87 | Yes |
| ENSMUSG00000050304 | -3,18E-01 | -1,683187403 | 2,83E-01 | 5,95E-01 | 8,43E-01 | Slc25a2       | 0,80 | No  |
| ENSMUSG00000050310 | 2,90E-02  | 5,969582895  | 1,95E-01 | 6,58E-01 | 8,81E-01 | Rictor        | 1,02 | No  |
| ENSMUSG00000050312 | -4,61E-02 | 4,190632711  | 2,92E-01 | 5,89E-01 | 8,41E-01 | Nsun3         | 0,97 | No  |
| ENSMUSG00000050315 | -5,18E-01 | 0,019412994  | 3,35E+00 | 6,72E-02 | 3,26E-01 | Synpo2        | 0,70 | No  |
| ENSMUSG00000050323 | -2,95E-02 | 1,664323803  | 3,14E-02 | 8,59E-01 | 9,95E-01 | Ndufaf6       | 0,98 | No  |

|                    |           |              |           |          |          |               |      |     |
|--------------------|-----------|--------------|-----------|----------|----------|---------------|------|-----|
| ENSMUSG00000050335 | 1,70E-01  | 11,99309251  | 9,29E+00  | 2,31E-03 | 3,15E-02 | Lgals3        | 1,12 | Yes |
| ENSMUSG00000050345 | -3,93E-01 | -2,219711626 | 2,09E-01  | 6,47E-01 | 8,75E-01 | 4930486L24Rik | 0,76 | No  |
| ENSMUSG00000050350 | 2,63E-01  | 1,053832727  | 1,67E+00  | 1,97E-01 | 5,50E-01 | Gpr18         | 1,20 | No  |
| ENSMUSG00000050357 | -1,88E-01 | 1,154019305  | 9,52E-01  | 3,29E-01 | 6,30E-01 | Carmil2       | 0,88 | No  |
| ENSMUSG00000050359 | 1,82E+00  | -3,033661385 | 1,31E+00  | 2,52E-01 | 5,50E-01 | Sprr1a        | 3,54 | No  |
| ENSMUSG00000050370 | 3,35E-01  | 3,845533587  | 1,16E+01  | 6,42E-04 | 1,13E-02 | Ch25h         | 1,26 | Yes |
| ENSMUSG00000050373 | -9,96E-02 | 4,325567076  | 1,45E+00  | 2,28E-01 | 5,50E-01 | Snx21         | 0,93 | No  |
| ENSMUSG00000050377 | 4,29E-01  | 2,267978264  | 9,53E+00  | 2,02E-03 | 2,82E-02 | Il31ra        | 1,35 | Yes |
| ENSMUSG00000050382 | 2,80E-02  | -0,140871115 | 8,15E-03  | 9,28E-01 | 1,00E+00 | Kif7          | 1,02 | No  |
| ENSMUSG00000050390 | 1,22E-01  | 5,692942917  | 3,24E+00  | 7,20E-02 | 3,40E-01 | C77080        | 1,09 | No  |
| ENSMUSG00000050395 | -6,95E-02 | 2,067267477  | 2,35E-01  | 6,27E-01 | 8,61E-01 | Tnfsf15       | 0,95 | No  |
| ENSMUSG00000050397 | -6,81E-02 | -2,268126419 | 6,41E-03  | 9,36E-01 | 1,00E+00 | Foxl2         | 0,95 | No  |
| ENSMUSG00000050410 | 1,67E-01  | 4,937308436  | 4,93E+00  | 2,63E-02 | 1,81E-01 | Tcf19         | 1,12 | No  |
| ENSMUSG00000050423 | 1,40E+00  | -1,998093681 | 2,79E+00  | 9,49E-02 | 3,86E-01 | Ppp1r3g       | 2,63 | No  |
| ENSMUSG00000050428 | 7,58E-02  | 4,040264758  | 7,79E-01  | 3,77E-01 | 6,78E-01 | Fbxo46        | 1,05 | No  |
| ENSMUSG00000050439 | -1,68E-01 | -0,711678812 | 1,84E-01  | 6,68E-01 | 8,87E-01 | Enthd1        | 0,89 | No  |
| ENSMUSG00000050440 | -4,38E-01 | -2,401366126 | 1,96E-01  | 6,58E-01 | 8,81E-01 | Hamp          | 0,74 | No  |
| ENSMUSG00000050445 | 7,96E-01  | -2,44864617  | 5,52E-01  | 4,58E-01 | 7,47E-01 | Cyp8b1        | 1,74 | No  |
| ENSMUSG00000050447 | -2,71E+00 | -3,033620915 | 2,92E+00  | 8,75E-02 | 3,78E-01 | Lypd6         | 0,15 | No  |
| ENSMUSG00000050463 | 1,85E+00  | -2,963264462 | 1,34E+00  | 2,48E-01 | 5,50E-01 | Krt78         | 3,59 | No  |
| ENSMUSG00000050468 | -3,83E-02 | -3,107651936 | -7,91E-11 | 1,00E+00 | 1,00E+00 | Astl          | 0,97 | No  |
| ENSMUSG00000050471 | 4,44E-02  | 4,811415132  | 3,41E-01  | 5,59E-01 | 8,22E-01 | Fam118b       | 1,03 | No  |
| ENSMUSG00000050473 | -2,83E-01 | -2,070209452 | 1,39E-01  | 7,09E-01 | 9,09E-01 | Slc35d3       | 0,82 | No  |
| ENSMUSG00000050490 | 2,22E-02  | 5,781800603  | 1,10E-01  | 7,40E-01 | 9,26E-01 | Gm8394        | 1,02 | No  |
| ENSMUSG00000050493 | 6,14E-01  | -1,20603627  | 1,66E+00  | 1,97E-01 | 5,50E-01 | Fam167b       | 1,53 | No  |
| ENSMUSG00000050503 | -2,54E-02 | 1,951746066  | 2,79E-02  | 8,67E-01 | 9,99E-01 | Fbxl22        | 0,98 | No  |
| ENSMUSG00000050511 | -1,47E+00 | 0,678465972  | 3,85E+01  | 5,43E-10 | 4,59E-08 | Oprd1         | 0,36 | Yes |
| ENSMUSG00000050526 | 4,34E-01  | -2,711766619 | 1,47E-01  | 7,02E-01 | 9,05E-01 | 4933406M09Rik | 1,35 | No  |
| ENSMUSG00000050530 | -4,72E-01 | -0,236607346 | 1,95E+00  | 1,63E-01 | 5,14E-01 | Fam171a1      | 0,72 | No  |
| ENSMUSG00000050533 | -1,12E-01 | 3,662101596  | 1,40E+00  | 2,36E-01 | 5,50E-01 | Gm9845        | 0,93 | No  |
| ENSMUSG00000050534 | -8,10E-01 | -2,963247942 | 3,56E-01  | 5,51E-01 | 8,17E-01 | Htr5b         | 0,57 | No  |
| ENSMUSG00000050538 | -3,06E-01 | 1,214516998  | 2,30E+00  | 1,30E-01 | 4,52E-01 | B230217C12Rik | 0,81 | No  |

|                    |           |              |          |          |          |               |      |     |
|--------------------|-----------|--------------|----------|----------|----------|---------------|------|-----|
| ENSMUSG00000050541 | -1,75E+00 | -2,655094277 | 2,12E+00 | 1,45E-01 | 4,83E-01 | Adra1b        | 0,30 | No  |
| ENSMUSG00000050545 | -7,33E-01 | -1,389783402 | 1,96E+00 | 1,61E-01 | 5,10E-01 | Fam228b       | 0,60 | No  |
| ENSMUSG00000050549 | 1,64E-02  | 4,306181639  | 3,89E-02 | 8,44E-01 | 9,85E-01 | 5730508B09Rik | 1,01 | No  |
| ENSMUSG00000050550 | 4,29E-02  | 6,30364809   | 4,54E-01 | 5,01E-01 | 7,86E-01 | Gm11868       | 1,03 | No  |
| ENSMUSG00000050552 | 7,31E-02  | 4,917396479  | 9,42E-01 | 3,32E-01 | 6,32E-01 | Lamtor4       | 1,05 | No  |
| ENSMUSG00000050553 | 2,70E-01  | -0,711778465 | 4,39E-01 | 5,08E-01 | 7,92E-01 | Gk2           | 1,21 | No  |
| ENSMUSG00000050555 | 5,20E-02  | 3,735829042  | 3,17E-01 | 5,73E-01 | 8,33E-01 | Hyls1         | 1,04 | No  |
| ENSMUSG00000050556 | -2,55E-01 | 0,18362027   | 8,40E-01 | 3,59E-01 | 6,61E-01 | Kcnb1         | 0,84 | No  |
| ENSMUSG00000050558 | -1,14E-02 | -3,033635021 | 1,50E-05 | 9,97E-01 | 1,00E+00 | Prokr2        | 0,99 | No  |
| ENSMUSG00000050565 | -6,55E-02 | 7,296248262  | 1,20E+00 | 2,73E-01 | 5,69E-01 | Tor1aip2      | 0,96 | No  |
| ENSMUSG00000050567 | 9,72E-02  | 5,320627393  | 1,87E+00 | 1,71E-01 | 5,27E-01 | Maml1         | 1,07 | No  |
| ENSMUSG00000050578 | 1,96E-01  | 5,890450628  | 8,51E+00 | 3,53E-03 | 4,32E-02 | Mmp13         | 1,15 | Yes |
| ENSMUSG00000050592 | 3,20E-01  | 4,800008437  | 1,76E+01 | 2,67E-05 | 7,97E-04 | Fam78a        | 1,25 | Yes |
| ENSMUSG00000050600 | -3,53E-01 | -1,472925366 | 4,80E-01 | 4,89E-01 | 7,76E-01 | Zfp831        | 0,78 | No  |
| ENSMUSG00000050605 | 1,82E-01  | 3,09985379   | 2,82E+00 | 9,30E-02 | 3,83E-01 | Zfp61         | 1,13 | No  |
| ENSMUSG00000050608 | -1,17E-01 | 5,787873659  | 3,07E+00 | 7,96E-02 | 3,61E-01 | Minos1        | 0,92 | No  |
| ENSMUSG00000050612 | -3,83E-01 | -2,268065202 | 1,85E-01 | 6,67E-01 | 8,86E-01 | Txndc2        | 0,77 | No  |
| ENSMUSG00000050619 | 4,12E-02  | 4,920682407  | 3,08E-01 | 5,79E-01 | 8,36E-01 | Zscan29       | 1,03 | No  |
| ENSMUSG00000050621 | -4,21E-01 | 7,879847433  | 5,18E+01 | 6,02E-13 | 7,54E-11 | Rps27rt       | 0,75 | Yes |
| ENSMUSG00000050623 | 2,06E+00  | -2,311297568 | 5,41E+00 | 2,00E-02 | 1,51E-01 | Catsperz      | 4,18 | No  |
| ENSMUSG00000050627 | 1,71E-01  | 6,276742403  | 7,18E+00 | 7,37E-03 | 7,45E-02 | Gpd1l         | 1,13 | No  |
| ENSMUSG00000050628 | 8,98E-02  | 5,260979218  | 1,58E+00 | 2,09E-01 | 5,50E-01 | Ubald2        | 1,06 | No  |
| ENSMUSG00000050640 | -6,93E-01 | 3,315569939  | 4,53E+01 | 1,69E-11 | 1,74E-09 | Tmem150c      | 0,62 | Yes |
| ENSMUSG00000050641 | 1,84E+00  | -3,033632273 | 1,33E+00 | 2,49E-01 | 5,50E-01 | BC048562      | 3,58 | No  |
| ENSMUSG00000050650 | 7,89E-01  | -2,71174177  | 5,39E-01 | 4,63E-01 | 7,51E-01 | Mrgpra1       | 1,73 | No  |
| ENSMUSG00000050668 | 5,54E-02  | 3,602692825  | 3,24E-01 | 5,69E-01 | 8,30E-01 | Gpatch11      | 1,04 | No  |
| ENSMUSG00000050671 | 7,52E-01  | -2,655080127 | 3,07E-01 | 5,80E-01 | 8,37E-01 | lsm2          | 1,68 | No  |
| ENSMUSG00000050675 | -2,64E-01 | 1,452349497  | 2,17E+00 | 1,41E-01 | 4,75E-01 | Gp1ba         | 0,83 | No  |
| ENSMUSG00000050677 | 1,49E-01  | -0,436910773 | 1,96E-01 | 6,58E-01 | 8,81E-01 | Ccdc96        | 1,11 | No  |
| ENSMUSG00000050685 | -7,07E-01 | -2,146111493 | 8,50E-01 | 3,57E-01 | 6,58E-01 | Ccdc54        | 0,61 | No  |
| ENSMUSG00000050697 | 8,54E-02  | 5,722589012  | 1,62E+00 | 2,03E-01 | 5,50E-01 | Prkaa1        | 1,06 | No  |
| ENSMUSG00000050700 | -1,92E+00 | -2,963214917 | 1,46E+00 | 2,27E-01 | 5,50E-01 | Emilin3       | 0,26 | No  |

|                    |           |              |           |          |          |               |      |     |
|--------------------|-----------|--------------|-----------|----------|----------|---------------|------|-----|
| ENSMUSG00000050702 | -5,76E-01 | -2,770648804 | 2,61E-01  | 6,10E-01 | 8,51E-01 | 4930563M21Rik | 0,67 | No  |
| ENSMUSG00000050705 | -1,59E-01 | 4,242184965  | 3,59E+00  | 5,80E-02 | 2,97E-01 | 2310061I04Rik | 0,90 | No  |
| ENSMUSG00000050708 | 6,43E-02  | 11,08753842  | 1,32E+00  | 2,50E-01 | 5,50E-01 | Ftl1          | 1,05 | No  |
| ENSMUSG00000050711 | 1,87E+00  | -3,107639691 | 1,38E+00  | 2,40E-01 | 5,50E-01 | Scg2          | 3,67 | No  |
| ENSMUSG00000050714 | -1,22E-01 | 1,148322592  | 4,26E-01  | 5,14E-01 | 7,96E-01 | Zbtb26        | 0,92 | No  |
| ENSMUSG00000050721 | 9,78E-02  | 7,64081717   | 2,75E+00  | 9,75E-02 | 3,90E-01 | Plekho2       | 1,07 | No  |
| ENSMUSG00000050730 | 1,47E-02  | 0,59883109   | 3,68E-03  | 9,52E-01 | 1,00E+00 | Arhgap42      | 1,01 | No  |
| ENSMUSG00000050732 | -1,22E-01 | 6,997578111  | 4,05E+00  | 4,43E-02 | 2,51E-01 | Vamp8         | 0,92 | No  |
| ENSMUSG00000050737 | -9,07E-02 | 1,225815712  | 2,17E-01  | 6,42E-01 | 8,71E-01 | Ptges         | 0,94 | No  |
| ENSMUSG00000050742 | -2,68E+00 | -2,831965433 | 2,85E+00  | 9,14E-02 | 3,82E-01 | Olfr164       | 0,16 | No  |
| ENSMUSG00000050747 | 1,08E+00  | -2,268049459 | 1,49E+00  | 2,22E-01 | 5,50E-01 | Trim15        | 2,11 | No  |
| ENSMUSG00000050751 | -7,19E-01 | -0,997911087 | 2,71E+00  | 9,96E-02 | 3,92E-01 | Pgbd5         | 0,61 | No  |
| ENSMUSG00000050761 | 5,54E-01  | -0,72634539  | 1,85E+00  | 1,73E-01 | 5,30E-01 | Gp1bb         | 1,47 | No  |
| ENSMUSG00000050762 | -6,85E-02 | -1,831997245 | 1,09E-02  | 9,17E-01 | 1,00E+00 | Prss27        | 0,95 | No  |
| ENSMUSG00000050772 | -1,87E+00 | -3,107637761 | 1,39E+00  | 2,38E-01 | 5,50E-01 | Olfr1124      | 0,27 | No  |
| ENSMUSG00000050777 | 4,04E-01  | 5,66801991   | 3,46E+01  | 4,15E-09 | 3,07E-07 | Tmem37        | 1,32 | Yes |
| ENSMUSG00000050783 | -1,36E+00 | -2,83197871  | 1,17E+00  | 2,80E-01 | 5,77E-01 | Htr1f         | 0,39 | No  |
| ENSMUSG00000050786 | -3,36E-02 | 2,424734933  | 6,30E-02  | 8,02E-01 | 9,61E-01 | Ccdc126       | 0,98 | No  |
| ENSMUSG00000050796 | 2,65E-01  | 3,069350236  | 5,66E+00  | 1,73E-02 | 1,38E-01 | B3galt6       | 1,20 | No  |
| ENSMUSG00000050799 | -1,75E-01 | -0,051989473 | 3,16E-01  | 5,74E-01 | 8,33E-01 | Hist1h2ba     | 0,89 | No  |
| ENSMUSG00000050812 | 3,38E-03  | 6,873557654  | 3,06E-03  | 9,56E-01 | 1,00E+00 | AI314180      | 1,00 | No  |
| ENSMUSG00000050815 | -2,74E+00 | -3,033596063 | 2,99E+00  | 8,38E-02 | 3,71E-01 | Olfr1441      | 0,15 | No  |
| ENSMUSG00000050821 | -2,63E-01 | 2,856314189  | 5,27E+00  | 2,16E-02 | 1,58E-01 | Fam131a       | 0,83 | No  |
| ENSMUSG00000050822 | -3,83E-02 | -3,107651936 | -7,91E-11 | 1,00E+00 | 1,00E+00 | Slc29a4       | 0,97 | No  |
| ENSMUSG00000050824 | -4,20E-01 | -1,146025647 | 8,83E-01  | 3,47E-01 | 6,48E-01 | Sstr5         | 0,75 | No  |
| ENSMUSG00000050830 | 1,84E+00  | -3,033649193 | 1,33E+00  | 2,49E-01 | 5,50E-01 | Vwc2          | 3,58 | No  |
| ENSMUSG00000050844 | 1,98E-01  | -1,289431737 | 1,59E-01  | 6,90E-01 | 8,99E-01 | 1700020N01Rik | 1,15 | No  |
| ENSMUSG00000050846 | 2,51E-01  | 2,907990976  | 4,83E+00  | 2,80E-02 | 1,89E-01 | Zfp623        | 1,19 | No  |
| ENSMUSG00000050854 | 3,19E-01  | -2,497618204 | 1,03E-01  | 7,48E-01 | 9,30E-01 | Tmem125       | 1,25 | No  |
| ENSMUSG00000050855 | -1,64E-01 | 0,539334854  | 4,66E-01  | 4,95E-01 | 7,80E-01 | Zfp940        | 0,89 | No  |
| ENSMUSG00000050856 | -3,33E-01 | 1,742872244  | 4,33E+00  | 3,74E-02 | 2,30E-01 | Atp5k         | 0,79 | No  |
| ENSMUSG00000050860 | 1,24E-01  | 4,0474887    | 1,94E+00  | 1,64E-01 | 5,15E-01 | Phospho1      | 1,09 | No  |

|                    |           |              |          |          |          |               |      |     |
|--------------------|-----------|--------------|----------|----------|----------|---------------|------|-----|
| ENSMUSG00000050866 | -1,91E+00 | -2,896105328 | 1,45E+00 | 2,28E-01 | 5,50E-01 | Clrn3         | 0,27 | No  |
| ENSMUSG00000050876 | -9,23E-01 | -1,963165901 | 2,10E+00 | 1,47E-01 | 4,86E-01 | Spata31d1a    | 0,53 | No  |
| ENSMUSG00000050890 | 1,37E-01  | 3,800338924  | 2,23E+00 | 1,36E-01 | 4,64E-01 | Pdik1l        | 1,10 | No  |
| ENSMUSG00000050891 | -1,80E-01 | 1,730606178  | 1,22E+00 | 2,69E-01 | 5,65E-01 | Tatdn1        | 0,88 | No  |
| ENSMUSG00000050896 | -7,67E-01 | 0,971441131  | 1,38E+01 | 2,06E-04 | 4,45E-03 | Rtn4rl2       | 0,59 | Yes |
| ENSMUSG00000050908 | -4,65E-02 | 4,098004822  | 2,88E-01 | 5,91E-01 | 8,42E-01 | Tvp23a        | 0,97 | No  |
| ENSMUSG00000050910 | 9,34E-02  | -1,472847932 | 3,66E-02 | 8,48E-01 | 9,88E-01 | Cdr2l         | 1,07 | No  |
| ENSMUSG00000050912 | -6,76E-01 | 9,955898657  | 1,43E+02 | 6,29E-33 | 4,38E-30 | Tmem123       | 0,63 | Yes |
| ENSMUSG00000050914 | 6,59E-01  | 1,35628359   | 1,32E+01 | 2,77E-04 | 5,69E-03 | Ankrd37       | 1,58 | Yes |
| ENSMUSG00000050917 | -9,78E-01 | -2,548194802 | 1,16E+00 | 2,82E-01 | 5,78E-01 | Fgf4          | 0,51 | No  |
| ENSMUSG00000050919 | -2,11E-01 | 5,606439488  | 9,78E+00 | 1,77E-03 | 2,53E-02 | Zfp366        | 0,86 | Yes |
| ENSMUSG00000050930 | 1,65E-01  | 1,082867047  | 6,76E-01 | 4,11E-01 | 7,07E-01 | Map10         | 1,12 | No  |
| ENSMUSG00000050931 | -6,92E-02 | 3,924343359  | 5,86E-01 | 4,44E-01 | 7,35E-01 | Sgms2         | 0,95 | No  |
| ENSMUSG00000050936 | -1,60E+00 | -3,033631402 | 1,07E+00 | 3,00E-01 | 5,96E-01 | Gm42743       | 0,33 | No  |
| ENSMUSG00000050944 | 7,18E-02  | -1,185588933 | 2,53E-02 | 8,74E-01 | 1,00E+00 | Efcab5        | 1,05 | No  |
| ENSMUSG00000050945 | 2,27E-01  | 1,040979444  | 1,23E+00 | 2,67E-01 | 5,64E-01 | Zfp438        | 1,17 | No  |
| ENSMUSG00000050947 | -3,36E-01 | 2,049594668  | 5,15E+00 | 2,33E-02 | 1,67E-01 | Amigo1        | 0,79 | No  |
| ENSMUSG00000050953 | -1,20E+00 | -0,847635891 | 9,43E+00 | 2,13E-03 | 2,94E-02 | Gja1          | 0,43 | Yes |
| ENSMUSG00000050954 | 1,30E-02  | 2,61264629   | 1,08E-02 | 9,17E-01 | 1,00E+00 | Zfp169        | 1,01 | No  |
| ENSMUSG00000050957 | -6,17E-01 | 4,459324118  | 5,78E+01 | 2,96E-14 | 4,20E-12 | Insl6         | 0,65 | Yes |
| ENSMUSG00000050961 | 6,75E-02  | 1,552964907  | 1,49E-01 | 7,00E-01 | 9,04E-01 | AY358078      | 1,05 | No  |
| ENSMUSG00000050965 | -5,27E-02 | 4,597383717  | 4,42E-01 | 5,06E-01 | 7,90E-01 | Prkca         | 0,96 | No  |
| ENSMUSG00000050966 | -9,48E-02 | -2,185648962 | 1,23E-02 | 9,12E-01 | 1,00E+00 | Lin28a        | 0,94 | No  |
| ENSMUSG00000050967 | 4,02E-01  | 3,651873937  | 1,77E+01 | 2,55E-05 | 7,65E-04 | Creg2         | 1,32 | Yes |
| ENSMUSG00000050973 | 4,25E-01  | 2,881112224  | 1,32E+01 | 2,81E-04 | 5,75E-03 | Gdpgp1        | 1,34 | Yes |
| ENSMUSG00000050974 | -2,51E-01 | 4,938267896  | 1,14E+01 | 7,33E-04 | 1,25E-02 | Gm9847        | 0,84 | Yes |
| ENSMUSG00000050982 | 1,87E+00  | -3,107639691 | 1,38E+00 | 2,40E-01 | 5,50E-01 | Apol10a       | 3,67 | No  |
| ENSMUSG00000050989 | 9,54E-02  | 5,751009699  | 2,01E+00 | 1,56E-01 | 5,01E-01 | Selenon       | 1,07 | No  |
| ENSMUSG00000050994 | 3,39E-01  | -0,079387363 | 1,22E+00 | 2,69E-01 | 5,66E-01 | Adgb          | 1,26 | No  |
| ENSMUSG00000051000 | -6,91E-01 | -1,448630852 | 1,92E+00 | 1,66E-01 | 5,19E-01 | Fam160a1      | 0,62 | No  |
| ENSMUSG00000051007 | 3,14E-02  | 4,497735178  | 1,55E-01 | 6,94E-01 | 9,02E-01 | Gatd1         | 1,02 | No  |
| ENSMUSG00000051008 | -6,13E-01 | -0,86357135  | 1,69E+00 | 1,94E-01 | 5,50E-01 | 4930412M03Rik | 0,65 | No  |

|                    |           |              |           |          |          |               |      |     |
|--------------------|-----------|--------------|-----------|----------|----------|---------------|------|-----|
| ENSMUSG00000051022 | -2,02E+00 | -2,54822875  | 3,10E+00  | 7,82E-02 | 3,57E-01 | Hs3st1        | 0,25 | No  |
| ENSMUSG00000051029 | -3,35E-01 | 0,2067491    | 1,44E+00  | 2,30E-01 | 5,50E-01 | Serpinb1b     | 0,79 | No  |
| ENSMUSG00000051034 | 3,53E-01  | 1,320149924  | 3,44E+00  | 6,36E-02 | 3,15E-01 | Zfp11         | 1,28 | No  |
| ENSMUSG00000051036 | 1,87E+00  | -3,107639691 | 1,38E+00  | 2,40E-01 | 5,50E-01 | Ttc24         | 3,67 | No  |
| ENSMUSG00000051037 | 1,70E-01  | 1,435154973  | 9,26E-01  | 3,36E-01 | 6,37E-01 | Zfp455        | 1,12 | No  |
| ENSMUSG00000051043 | 4,96E-01  | 5,145810549  | 4,64E+01  | 9,86E-12 | 1,04E-09 | Gprc5c        | 1,41 | Yes |
| ENSMUSG00000051048 | -1,33E+00 | -2,711695278 | 1,10E+00  | 2,94E-01 | 5,89E-01 | P4ha3         | 0,40 | No  |
| ENSMUSG00000051054 | 1,25E+00  | -2,49762211  | 9,65E-01  | 3,26E-01 | 6,27E-01 | 1700014D04Rik | 2,38 | No  |
| ENSMUSG00000051056 | -1,89E+00 | -3,1076441   | 1,42E+00  | 2,33E-01 | 5,50E-01 | Gja10         | 0,27 | No  |
| ENSMUSG00000051065 | -3,00E-01 | 1,419635716  | 2,61E+00  | 1,06E-01 | 3,98E-01 | Mb21d2        | 0,81 | No  |
| ENSMUSG00000051074 | -1,89E-01 | -1,89618463  | 9,55E-02  | 7,57E-01 | 9,35E-01 | 4930579K19Rik | 0,88 | No  |
| ENSMUSG00000051076 | -8,12E-01 | -2,896127374 | 3,61E-01  | 5,48E-01 | 8,15E-01 | Vtcn1         | 0,57 | No  |
| ENSMUSG00000051098 | -5,33E-02 | 2,210678213  | 1,41E-01  | 7,08E-01 | 9,08E-01 | Mblac2        | 0,96 | No  |
| ENSMUSG00000051107 | 2,38E-01  | 1,483702664  | 1,82E+00  | 1,77E-01 | 5,37E-01 | Gm15440       | 1,18 | No  |
| ENSMUSG00000051111 | -2,71E+00 | -2,896162395 | 2,92E+00  | 8,76E-02 | 3,78E-01 | Sv2c          | 0,15 | No  |
| ENSMUSG00000051113 | -3,70E-01 | 0,002052461  | 1,68E+00  | 1,95E-01 | 5,50E-01 | Fam71e1       | 0,77 | No  |
| ENSMUSG00000051116 | -4,82E-02 | 3,762709251  | 2,62E-01  | 6,09E-01 | 8,51E-01 | Gm8121        | 0,97 | No  |
| ENSMUSG00000051118 | -1,49E-01 | 3,98724318   | 2,81E+00  | 9,39E-02 | 3,84E-01 | Olfr77        | 0,90 | No  |
| ENSMUSG00000051124 | -7,80E-01 | -0,448721107 | 5,02E+00  | 2,51E-02 | 1,75E-01 | Gimap9        | 0,58 | No  |
| ENSMUSG00000051133 | -2,98E-02 | 0,799330708  | 1,72E-02  | 8,96E-01 | 1,00E+00 | Gm6293        | 0,98 | No  |
| ENSMUSG00000051136 | 3,14E-02  | -3,107617333 | -7,69E-10 | 1,00E+00 | 1,00E+00 | Ghsr          | 1,02 | No  |
| ENSMUSG00000051146 | 4,24E-01  | 0,019388911  | 1,86E+00  | 1,73E-01 | 5,30E-01 | Camk2n2       | 1,34 | No  |
| ENSMUSG00000051147 | 8,60E-02  | 2,179622508  | 3,71E-01  | 5,42E-01 | 8,12E-01 | Nat2          | 1,06 | No  |
| ENSMUSG00000051149 | 3,43E-02  | 5,151195087  | 2,29E-01  | 6,32E-01 | 8,64E-01 | Adnp          | 1,02 | No  |
| ENSMUSG00000051154 | -1,62E-01 | 5,627116714  | 5,67E+00  | 1,72E-02 | 1,37E-01 | Commd3        | 0,89 | No  |
| ENSMUSG00000051166 | -4,08E-01 | 3,944615857  | 2,14E+01  | 3,74E-06 | 1,41E-04 | Eml5          | 0,75 | Yes |
| ENSMUSG00000051169 | 2,02E-01  | 1,173326872  | 1,09E+00  | 2,96E-01 | 5,92E-01 | Rpusd3        | 1,15 | No  |
| ENSMUSG00000051177 | -3,15E-01 | 0,323869276  | 1,45E+00  | 2,29E-01 | 5,50E-01 | Plcb1         | 0,80 | No  |
| ENSMUSG00000051184 | -3,64E-01 | 3,204244841  | 1,18E+01  | 5,77E-04 | 1,04E-02 | Zfp524        | 0,78 | Yes |
| ENSMUSG00000051185 | 1,17E-01  | 5,297589718  | 2,69E+00  | 1,01E-01 | 3,93E-01 | Fam174a       | 1,08 | No  |
| ENSMUSG00000051212 | 2,79E-01  | 5,261383668  | 1,53E+01  | 9,25E-05 | 2,27E-03 | Gpr183        | 1,21 | Yes |
| ENSMUSG00000051223 | -4,39E-02 | 8,010098907  | 5,70E-01  | 4,50E-01 | 7,40E-01 | Bzw1          | 0,97 | No  |



|                    |           |              |          |          |          |               |      |     |
|--------------------|-----------|--------------|----------|----------|----------|---------------|------|-----|
| ENSMUSG00000051225 | -1,02E+00 | -1,800968341 | 2,32E+00 | 1,28E-01 | 4,49E-01 | Fam83a        | 0,49 | No  |
| ENSMUSG00000051232 | -3,82E-02 | 4,427110283  | 2,18E-01 | 6,40E-01 | 8,70E-01 | Tmem199       | 0,97 | No  |
| ENSMUSG00000051234 | -2,35E-02 | 5,518079557  | 1,16E-01 | 7,33E-01 | 9,23E-01 | Rnf7          | 0,98 | No  |
| ENSMUSG00000051235 | 2,36E-01  | 3,9307479    | 7,01E+00 | 8,12E-03 | 7,99E-02 | Gen1          | 1,18 | No  |
| ENSMUSG00000051236 | -2,23E-01 | -1,015692677 | 2,55E-01 | 6,14E-01 | 8,53E-01 | Msrb3         | 0,86 | No  |
| ENSMUSG00000051237 | 1,87E+00  | -3,107639691 | 1,38E+00 | 2,40E-01 | 5,50E-01 | 9230109A22Rik | 3,67 | No  |
| ENSMUSG00000051238 | 3,01E-01  | 2,718253221  | 6,04E+00 | 1,40E-02 | 1,20E-01 | Swsap1        | 1,23 | No  |
| ENSMUSG00000051243 | -1,35E+00 | -2,832022066 | 1,13E+00 | 2,87E-01 | 5,83E-01 | Islr2         | 0,39 | No  |
| ENSMUSG00000051246 | 2,85E-01  | 1,764978965  | 2,83E+00 | 9,28E-02 | 3,83E-01 | Msantd1       | 1,22 | No  |
| ENSMUSG00000051251 | -4,00E-02 | -2,77057572  | 1,08E-03 | 9,74E-01 | 1,00E+00 | Nhlh1         | 0,97 | No  |
| ENSMUSG00000051255 | -5,59E-02 | 5,382356572  | 6,34E-01 | 4,26E-01 | 7,20E-01 | Gm6563        | 0,96 | No  |
| ENSMUSG00000051256 | -8,34E-03 | 4,874515056  | 1,22E-02 | 9,12E-01 | 1,00E+00 | Jagn1         | 0,99 | No  |
| ENSMUSG00000051262 | -1,94E+00 | -3,107619243 | 1,50E+00 | 2,21E-01 | 5,50E-01 | Nat8f3        | 0,26 | No  |
| ENSMUSG00000051278 | 2,04E-01  | 3,997699829  | 5,17E+00 | 2,29E-02 | 1,65E-01 | Zgrf1         | 1,15 | No  |
| ENSMUSG00000051279 | -1,87E+00 | -3,107637761 | 1,39E+00 | 2,38E-01 | 5,50E-01 | Gdf6          | 0,27 | No  |
| ENSMUSG00000051285 | -9,09E-03 | 5,794599681  | 1,86E-02 | 8,92E-01 | 1,00E+00 | Pcmdt1        | 0,99 | No  |
| ENSMUSG00000051295 | 7,43E-01  | -2,963261206 | 3,01E-01 | 5,83E-01 | 8,38E-01 | 9630028B13Rik | 1,67 | No  |
| ENSMUSG00000051306 | 5,36E-02  | 3,967320495  | 3,63E-01 | 5,47E-01 | 8,14E-01 | Usp42         | 1,04 | No  |
| ENSMUSG00000051314 | 4,30E-01  | 3,678604444  | 1,99E+01 | 8,31E-06 | 2,85E-04 | Ffar2         | 1,35 | Yes |
| ENSMUSG00000051316 | 1,81E-01  | 3,818772412  | 3,88E+00 | 4,89E-02 | 2,66E-01 | Taf7          | 1,13 | No  |
| ENSMUSG00000051319 | -3,43E-02 | 3,826724472  | 1,35E-01 | 7,13E-01 | 9,11E-01 | 1500011K16Rik | 0,98 | No  |
| ENSMUSG00000051329 | 8,86E-02  | 5,266394192  | 1,54E+00 | 2,14E-01 | 5,50E-01 | Nup160        | 1,06 | No  |
| ENSMUSG00000051331 | -8,67E-02 | -1,627672834 | 2,64E-02 | 8,71E-01 | 1,00E+00 | Cacna1c       | 0,94 | No  |
| ENSMUSG00000051335 | -2,76E-01 | 5,261498152  | 1,47E+01 | 1,28E-04 | 2,97E-03 | Gfod1         | 0,83 | Yes |
| ENSMUSG00000051339 | 3,37E-01  | 4,255726283  | 1,56E+01 | 7,66E-05 | 1,94E-03 | 2900026A02Rik | 1,26 | Yes |
| ENSMUSG00000051341 | 2,27E-01  | 3,71085263   | 6,20E+00 | 1,28E-02 | 1,12E-01 | Zfp52         | 1,17 | No  |
| ENSMUSG00000051343 | 1,25E-01  | 6,987190511  | 4,24E+00 | 3,94E-02 | 2,36E-01 | Rab11fip5     | 1,09 | No  |
| ENSMUSG00000051344 | 1,95E-01  | 6,538211873  | 9,68E+00 | 1,87E-03 | 2,65E-02 | Plekhm3       | 1,14 | Yes |
| ENSMUSG00000051346 | 5,59E-02  | 3,444828267  | 3,14E-01 | 5,75E-01 | 8,34E-01 | Spryd4        | 1,04 | No  |
| ENSMUSG00000051351 | 1,98E-01  | 3,648567514  | 4,36E+00 | 3,69E-02 | 2,28E-01 | Zfp46         | 1,15 | No  |
| ENSMUSG00000051355 | -5,63E-02 | 4,719631722  | 5,30E-01 | 4,66E-01 | 7,55E-01 | Commd1        | 0,96 | No  |
| ENSMUSG00000051359 | -1,33E+00 | -1,669008195 | 4,65E+00 | 3,10E-02 | 2,03E-01 | Ncald         | 0,40 | No  |

|                    |           |              |          |          |          |         |      |     |
|--------------------|-----------|--------------|----------|----------|----------|---------|------|-----|
| ENSMUSG00000051367 | -6,76E-02 | 3,712153905  | 5,11E-01 | 4,75E-01 | 7,63E-01 | Six1    | 0,95 | No  |
| ENSMUSG00000051373 | 1,99E-02  | 0,028281444  | 4,53E-03 | 9,46E-01 | 1,00E+00 | Plpp7   | 1,01 | No  |
| ENSMUSG00000051375 | -5,50E-01 | -2,107598669 | 6,60E-01 | 4,17E-01 | 7,12E-01 | Pcdh1   | 0,68 | No  |
| ENSMUSG00000051378 | 3,24E-01  | 4,546687725  | 1,64E+01 | 5,09E-05 | 1,38E-03 | Kif18b  | 1,25 | Yes |
| ENSMUSG00000051379 | -1,28E-01 | 6,767243123  | 4,29E+00 | 3,82E-02 | 2,32E-01 | Flrt3   | 0,92 | No  |
| ENSMUSG00000051390 | -3,75E-02 | 5,543316177  | 2,95E-01 | 5,87E-01 | 8,40E-01 | Zbtb22  | 0,97 | No  |
| ENSMUSG00000051391 | 7,65E-02  | 8,625873809  | 1,79E+00 | 1,81E-01 | 5,43E-01 | Ywhag   | 1,05 | No  |
| ENSMUSG00000051396 | 2,18E-01  | 3,990796103  | 5,90E+00 | 1,51E-02 | 1,27E-01 | Gm45902 | 1,16 | No  |
| ENSMUSG00000051397 | -2,31E-01 | 1,656032776  | 1,93E+00 | 1,65E-01 | 5,18E-01 | Tacstd2 | 0,85 | No  |
| ENSMUSG00000051403 | 6,90E-02  | 5,258504354  | 9,32E-01 | 3,34E-01 | 6,35E-01 | Ppp1r37 | 1,05 | No  |
| ENSMUSG00000051413 | -1,60E-01 | 6,104142205  | 6,18E+00 | 1,29E-02 | 1,13E-01 | Plagl2  | 0,89 | No  |
| ENSMUSG00000051427 | -2,70E-01 | 2,693404169  | 4,91E+00 | 2,68E-02 | 1,83E-01 | Ccdc157 | 0,83 | No  |
| ENSMUSG00000051431 | 1,82E+00  | -3,033661385 | 1,31E+00 | 2,52E-01 | 5,50E-01 | Gpr87   | 3,54 | No  |
| ENSMUSG00000051435 | 3,63E-01  | -2,289530377 | 1,72E-01 | 6,78E-01 | 8,92E-01 | Fhad1   | 1,29 | No  |
| ENSMUSG00000051439 | 3,67E-02  | 6,916391537  | 3,57E-01 | 5,50E-01 | 8,17E-01 | Cd14    | 1,03 | No  |
| ENSMUSG00000051444 | -1,22E-01 | 1,950656036  | 7,09E-01 | 4,00E-01 | 6,99E-01 | Bbs12   | 0,92 | No  |
| ENSMUSG00000051451 | 4,53E-02  | 5,207182147  | 4,04E-01 | 5,25E-01 | 8,02E-01 | Crebzf  | 1,03 | No  |
| ENSMUSG00000051455 | -1,14E+00 | -1,896071554 | 2,97E+00 | 8,47E-02 | 3,73E-01 | Meioc   | 0,45 | No  |
| ENSMUSG00000051457 | 1,65E-01  | 7,023790558  | 7,43E+00 | 6,40E-03 | 6,73E-02 | Spn     | 1,12 | No  |
| ENSMUSG00000051469 | 2,01E-02  | 4,957466769  | 7,29E-02 | 7,87E-01 | 9,53E-01 | Zfp24   | 1,01 | No  |
| ENSMUSG00000051483 | 8,10E-02  | 3,642099638  | 7,02E-01 | 4,02E-01 | 7,00E-01 | Cbr1    | 1,06 | No  |
| ENSMUSG00000051490 | -2,65E+00 | -3,033633091 | 2,78E+00 | 9,55E-02 | 3,86E-01 | Foxd4   | 0,16 | No  |
| ENSMUSG00000051495 | 6,15E-02  | 8,06859387   | 1,12E+00 | 2,90E-01 | 5,86E-01 | Irf2bp2 | 1,04 | No  |
| ENSMUSG00000051497 | -3,57E+00 | -2,89611556  | 5,73E+00 | 1,67E-02 | 1,35E-01 | Kcnj16  | 0,08 | No  |
| ENSMUSG00000051498 | 1,03E-01  | 4,282030012  | 1,49E+00 | 2,21E-01 | 5,50E-01 | Tlr6    | 1,07 | No  |
| ENSMUSG00000051499 | 4,02E-01  | 0,244182134  | 2,38E+00 | 1,23E-01 | 4,38E-01 | Zfp786  | 1,32 | No  |
| ENSMUSG00000051502 | 3,79E-02  | 0,514416257  | 2,47E-02 | 8,75E-01 | 1,00E+00 | Ufsp1   | 1,03 | No  |
| ENSMUSG00000051503 | 3,53E-01  | -1,146003202 | 6,05E-01 | 4,37E-01 | 7,29E-01 | Gm6583  | 1,28 | No  |
| ENSMUSG00000051504 | 5,86E-01  | 0,489920333  | 5,45E+00 | 1,96E-02 | 1,49E-01 | Siglech | 1,50 | No  |
| ENSMUSG00000051506 | 2,44E-01  | 8,915076312  | 1,83E+01 | 1,86E-05 | 5,80E-04 | Wdfy4   | 1,18 | Yes |
| ENSMUSG00000051510 | 6,96E-02  | 6,724331582  | 1,27E+00 | 2,61E-01 | 5,54E-01 | Mafg    | 1,05 | No  |
| ENSMUSG00000051515 | -2,91E-01 | -0,185486768 | 7,93E-01 | 3,73E-01 | 6,74E-01 | Fam181b | 0,82 | No  |

|                    |           |              |          |          |          |               |      |     |
|--------------------|-----------|--------------|----------|----------|----------|---------------|------|-----|
| ENSMUSG00000051517 | 3,93E-01  | 3,125709901  | 1,32E+01 | 2,87E-04 | 5,83E-03 | Arhgef39      | 1,31 | Yes |
| ENSMUSG00000051518 | -9,79E-02 | 4,026079534  | 1,22E+00 | 2,69E-01 | 5,66E-01 | Rps19bp1      | 0,93 | No  |
| ENSMUSG00000051527 | -2,68E+00 | -3,033645766 | 2,84E+00 | 9,17E-02 | 3,82E-01 | Usp29         | 0,16 | No  |
| ENSMUSG00000051528 | -1,94E+00 | -3,107619243 | 1,50E+00 | 2,21E-01 | 5,50E-01 | Olfr424       | 0,26 | No  |
| ENSMUSG00000051548 | -1,47E-01 | 3,1687858    | 1,83E+00 | 1,76E-01 | 5,35E-01 | Gm6365        | 0,90 | No  |
| ENSMUSG00000051550 | -9,50E-02 | 2,308162772  | 4,94E-01 | 4,82E-01 | 7,69E-01 | Zfp579        | 0,94 | No  |
| ENSMUSG00000051557 | 3,46E-02  | 4,276304492  | 1,71E-01 | 6,79E-01 | 8,93E-01 | Pusl1         | 1,02 | No  |
| ENSMUSG00000051586 | -2,80E-01 | 5,130065133  | 1,53E+01 | 9,37E-05 | 2,29E-03 | Mical3        | 0,82 | Yes |
| ENSMUSG00000051590 | -5,08E-01 | -1,770590287 | 6,26E-01 | 4,29E-01 | 7,23E-01 | Map3k19       | 0,70 | No  |
| ENSMUSG00000051591 | -4,01E-02 | -2,711715319 | 1,12E-03 | 9,73E-01 | 1,00E+00 | Olfr697       | 0,97 | No  |
| ENSMUSG00000051596 | -1,89E+00 | -3,1076441   | 1,42E+00 | 2,33E-01 | 5,50E-01 | Otop1         | 0,27 | No  |
| ENSMUSG00000051599 | -1,94E+00 | -3,107619243 | 1,50E+00 | 2,21E-01 | 5,50E-01 | Pcdhb2        | 0,26 | No  |
| ENSMUSG00000051606 | 1,57E-01  | 4,184313769  | 3,32E+00 | 6,84E-02 | 3,29E-01 | 2010001K21Rik | 1,11 | No  |
| ENSMUSG00000051611 | 6,12E-01  | 1,786258878  | 1,42E+01 | 1,64E-04 | 3,67E-03 | Olfr112       | 1,53 | Yes |
| ENSMUSG00000051615 | 2,44E-02  | 7,61889669   | 1,72E-01 | 6,79E-01 | 8,93E-01 | Rap2a         | 1,02 | No  |
| ENSMUSG00000051627 | -1,26E-01 | 1,487261235  | 5,28E-01 | 4,67E-01 | 7,56E-01 | Hist1h1e      | 0,92 | No  |
| ENSMUSG00000051638 | 1,85E+00  | -3,107657832 | 1,35E+00 | 2,46E-01 | 5,50E-01 | Gm9857        | 3,61 | No  |
| ENSMUSG00000051639 | 5,39E-02  | 5,552189406  | 6,09E-01 | 4,35E-01 | 7,28E-01 | Gm5812        | 1,04 | No  |
| ENSMUSG00000051648 | -8,87E-02 | 1,072807443  | 1,94E-01 | 6,60E-01 | 8,82E-01 | Kctd19        | 0,94 | No  |
| ENSMUSG00000051650 | 2,04E-01  | 5,47632432   | 8,58E+00 | 3,39E-03 | 4,20E-02 | B3gnt2        | 1,15 | Yes |
| ENSMUSG00000051652 | -3,76E-02 | -0,998130423 | 8,09E-03 | 9,28E-01 | 1,00E+00 | Lrrc3         | 0,97 | No  |
| ENSMUSG00000051669 | -1,82E-01 | 0,48677089   | 5,50E-01 | 4,58E-01 | 7,47E-01 | AU021092      | 0,88 | No  |
| ENSMUSG00000051671 | -2,02E-01 | 3,348385353  | 3,78E+00 | 5,18E-02 | 2,77E-01 | Coa6          | 0,87 | No  |
| ENSMUSG00000051674 | 8,86E-02  | 2,6543016    | 5,18E-01 | 4,72E-01 | 7,60E-01 | Dcun1d4       | 1,06 | No  |
| ENSMUSG00000051675 | 2,48E-01  | 3,209568118  | 5,73E+00 | 1,67E-02 | 1,35E-01 | Trim32        | 1,19 | No  |
| ENSMUSG00000051682 | -6,39E-01 | 0,993411477  | 9,98E+00 | 1,58E-03 | 2,32E-02 | Trem14        | 0,64 | Yes |
| ENSMUSG00000051695 | 3,77E-02  | 8,147708841  | 4,22E-01 | 5,16E-01 | 7,97E-01 | Pcbp1         | 1,03 | No  |
| ENSMUSG00000051703 | 1,42E-01  | 1,433197935  | 6,08E-01 | 4,36E-01 | 7,28E-01 | Tmem198       | 1,10 | No  |
| ENSMUSG00000051705 | 1,64E-01  | 2,552280385  | 1,73E+00 | 1,88E-01 | 5,50E-01 | Senp8         | 1,12 | No  |
| ENSMUSG00000051716 | -5,73E-02 | -1,77045148  | 7,67E-03 | 9,30E-01 | 1,00E+00 | Apon          | 0,96 | No  |
| ENSMUSG00000051721 | 2,00E-01  | 2,492098626  | 2,49E+00 | 1,14E-01 | 4,18E-01 | Wdcp          | 1,15 | No  |
| ENSMUSG00000051723 | -6,40E-02 | 4,277043312  | 5,82E-01 | 4,46E-01 | 7,37E-01 | Rpl31-ps13    | 0,96 | No  |

|                    |           |              |          |          |          |               |      |     |
|--------------------|-----------|--------------|----------|----------|----------|---------------|------|-----|
| ENSMUSG00000051726 | -1,94E+00 | -3,107619243 | 1,50E+00 | 2,21E-01 | 5,50E-01 | Kcnf1         | 0,26 | No  |
| ENSMUSG00000051727 | 7,78E-02  | 3,924266643  | 7,72E-01 | 3,80E-01 | 6,81E-01 | Kctd14        | 1,06 | No  |
| ENSMUSG00000051728 | -1,94E+00 | -3,107619243 | 1,50E+00 | 2,21E-01 | 5,50E-01 | 4930563D23Rik | 0,26 | No  |
| ENSMUSG00000051730 | 9,11E-02  | 3,817705202  | 9,68E-01 | 3,25E-01 | 6,26E-01 | Mettl5        | 1,07 | No  |
| ENSMUSG00000051732 | 1,84E+00  | -3,033649193 | 1,33E+00 | 2,49E-01 | 5,50E-01 | Pabpc2        | 3,58 | No  |
| ENSMUSG00000051735 | 4,20E-02  | 5,943615494  | 4,11E-01 | 5,21E-01 | 8,00E-01 | Rinl          | 1,03 | No  |
| ENSMUSG00000051736 | -7,03E-02 | 0,04537418   | 6,36E-02 | 8,01E-01 | 9,61E-01 | Fam229b       | 0,95 | No  |
| ENSMUSG00000051747 | -2,07E-01 | -0,246925354 | 4,07E-01 | 5,23E-01 | 8,01E-01 | Ttn           | 0,87 | No  |
| ENSMUSG00000051748 | -3,57E-01 | 5,263789541  | 2,47E+01 | 6,78E-07 | 3,14E-05 | Wfdc21        | 0,78 | Yes |
| ENSMUSG00000051768 | 4,74E-02  | 4,606590179  | 3,61E-01 | 5,48E-01 | 8,15E-01 | Xrcc1         | 1,03 | No  |
| ENSMUSG00000051769 | 1,87E+00  | -3,107639691 | 1,38E+00 | 2,40E-01 | 5,50E-01 | Wfdc15a       | 3,67 | No  |
| ENSMUSG00000051786 | 1,80E-01  | 5,06762892   | 6,12E+00 | 1,34E-02 | 1,16E-01 | Tubgcp6       | 1,13 | No  |
| ENSMUSG00000051790 | -1,52E-01 | 2,96927859   | 1,80E+00 | 1,80E-01 | 5,42E-01 | Nlgn2         | 0,90 | No  |
| ENSMUSG00000051805 | -1,74E+00 | -2,83197636  | 2,11E+00 | 1,47E-01 | 4,85E-01 | A530095I07Rik | 0,30 | No  |
| ENSMUSG00000051811 | 2,57E-01  | 1,070550171  | 1,50E+00 | 2,20E-01 | 5,50E-01 | Cox6b2        | 1,20 | No  |
| ENSMUSG00000051817 | 2,81E-01  | 1,251699239  | 2,16E+00 | 1,42E-01 | 4,76E-01 | Sox12         | 1,22 | No  |
| ENSMUSG00000051832 | 3,07E-01  | 5,225688441  | 1,81E+01 | 2,05E-05 | 6,36E-04 | E230016K23Rik | 1,24 | Yes |
| ENSMUSG00000051839 | 2,65E+00  | -3,033655087 | 2,73E+00 | 9,86E-02 | 3,91E-01 | Gypa          | 6,30 | No  |
| ENSMUSG00000051844 | -7,34E-02 | 0,187283117  | 7,41E-02 | 7,86E-01 | 9,52E-01 | B230319C09Rik | 0,95 | No  |
| ENSMUSG00000051853 | 4,36E-02  | 8,654512881  | 5,80E-01 | 4,46E-01 | 7,37E-01 | Arf3          | 1,03 | No  |
| ENSMUSG00000051855 | -1,82E-02 | 1,246036994  | 8,50E-03 | 9,27E-01 | 1,00E+00 | Mest          | 0,99 | No  |
| ENSMUSG00000051860 | -1,90E+00 | -2,963239763 | 1,44E+00 | 2,31E-01 | 5,50E-01 | Samd7         | 0,27 | No  |
| ENSMUSG00000051864 | 1,15E-01  | 6,159546467  | 3,17E+00 | 7,48E-02 | 3,48E-01 | Tbc1d22a      | 1,08 | No  |
| ENSMUSG00000051890 | -1,17E-01 | 1,726653081  | 5,17E-01 | 4,72E-01 | 7,60E-01 | Klhdc1        | 0,92 | No  |
| ENSMUSG00000051896 | 2,65E+00  | -3,033655087 | 2,73E+00 | 9,86E-02 | 3,91E-01 | Tex37         | 6,30 | No  |
| ENSMUSG00000051900 | -7,38E-02 | -3,033659033 | 2,66E-03 | 9,59E-01 | 1,00E+00 | Abca16        | 0,95 | No  |
| ENSMUSG00000051910 | 2,62E+00  | -2,963288024 | 2,65E+00 | 1,03E-01 | 3,95E-01 | Sox6          | 6,14 | No  |
| ENSMUSG00000051920 | 1,84E+00  | -2,896131242 | 1,33E+00 | 2,49E-01 | 5,50E-01 | Rspo2         | 3,58 | No  |
| ENSMUSG00000051934 | -1,51E-01 | 2,701418686  | 1,59E+00 | 2,07E-01 | 5,50E-01 | Spats2        | 0,90 | No  |
| ENSMUSG00000051940 | 1,87E+00  | -3,107639691 | 1,38E+00 | 2,40E-01 | 5,50E-01 | 5031410I06Rik | 3,67 | No  |
| ENSMUSG00000051950 | 6,64E-02  | 2,626991731  | 2,90E-01 | 5,90E-01 | 8,41E-01 | B3glct        | 1,05 | No  |
| ENSMUSG00000051965 | -1,25E+00 | -2,655131058 | 1,23E+00 | 2,67E-01 | 5,64E-01 | Nanos2        | 0,42 | No  |

|                    |           |              |           |          |          |               |      |     |
|--------------------|-----------|--------------|-----------|----------|----------|---------------|------|-----|
| ENSMUSG00000051969 | 4,33E-01  | 3,1987563    | 1,62E+01  | 5,61E-05 | 1,50E-03 | Tlr11         | 1,35 | Yes |
| ENSMUSG00000051977 | -8,57E-02 | 3,618992653  | 8,19E-01  | 3,65E-01 | 6,66E-01 | Prdm9         | 0,94 | No  |
| ENSMUSG00000051978 | -7,01E-02 | 3,156306124  | 4,20E-01  | 5,17E-01 | 7,98E-01 | Erich1        | 0,95 | No  |
| ENSMUSG00000051980 | -1,40E+00 | 0,358865407  | 2,84E+01  | 9,84E-08 | 5,52E-06 | Casr          | 0,38 | Yes |
| ENSMUSG00000051984 | 2,52E-01  | 0,712380554  | 1,16E+00  | 2,80E-01 | 5,77E-01 | Sec31b        | 1,19 | No  |
| ENSMUSG00000051985 | -3,83E-02 | -3,107651936 | -7,91E-11 | 1,00E+00 | 1,00E+00 | Igfn1         | 0,97 | No  |
| ENSMUSG00000051989 | -1,39E-01 | 2,893870069  | 1,43E+00  | 2,31E-01 | 5,50E-01 | Smim11        | 0,91 | No  |
| ENSMUSG00000051998 | -3,83E-02 | -3,107651936 | -7,91E-11 | 1,00E+00 | 1,00E+00 | Lax1          | 0,97 | No  |
| ENSMUSG00000052005 | 1,55E+00  | -2,146128176 | 3,60E+00  | 5,78E-02 | 2,97E-01 | Gm9864        | 2,93 | No  |
| ENSMUSG00000052013 | -1,37E-02 | 4,651509762  | 3,06E-02  | 8,61E-01 | 9,96E-01 | Btla          | 0,99 | No  |
| ENSMUSG00000052026 | -2,74E+00 | -3,033596063 | 2,99E+00  | 8,38E-02 | 3,71E-01 | Slc6a7        | 0,15 | No  |
| ENSMUSG00000052031 | -2,68E-02 | 4,373842705  | 1,06E-01  | 7,44E-01 | 9,29E-01 | Tagap1        | 0,98 | No  |
| ENSMUSG00000052033 | 2,08E-01  | 3,608259015  | 4,63E+00  | 3,14E-02 | 2,05E-01 | Pfdn4         | 1,16 | No  |
| ENSMUSG00000052040 | 2,03E-01  | 7,482451417  | 1,17E+01  | 6,28E-04 | 1,11E-02 | Klf13         | 1,15 | Yes |
| ENSMUSG00000052056 | -3,31E-01 | 7,121697145  | 3,03E+01  | 3,71E-08 | 2,26E-06 | Zfp217        | 0,80 | Yes |
| ENSMUSG00000052062 | 6,98E-03  | -0,121835337 | 5,37E-04  | 9,82E-01 | 1,00E+00 | Pard3b        | 1,00 | No  |
| ENSMUSG00000052085 | -4,51E-02 | 8,217456992  | 6,09E-01  | 4,35E-01 | 7,28E-01 | Dock8         | 0,97 | No  |
| ENSMUSG00000052087 | 7,15E-02  | 5,96111341   | 1,18E+00  | 2,77E-01 | 5,73E-01 | Rgs14         | 1,05 | No  |
| ENSMUSG00000052102 | 1,30E-01  | 6,551357935  | 4,32E+00  | 3,78E-02 | 2,31E-01 | Gnpda1        | 1,09 | No  |
| ENSMUSG00000052105 | -6,39E-02 | -2,963280242 | 1,86E-03  | 9,66E-01 | 1,00E+00 | Mtcl1         | 0,96 | No  |
| ENSMUSG00000052117 | -5,28E-01 | 3,438889335  | 2,94E+01  | 5,96E-08 | 3,49E-06 | D630039A03Rik | 0,69 | Yes |
| ENSMUSG00000052125 | -7,87E-01 | 5,031203312  | 1,16E+02  | 4,05E-27 | 1,73E-24 | F730043M19Rik | 0,58 | Yes |
| ENSMUSG00000052131 | -1,14E-02 | -2,831959937 | 1,18E-04  | 9,91E-01 | 1,00E+00 | Akr1b7        | 0,99 | No  |
| ENSMUSG00000052133 | 4,24E-02  | -3,033592245 | -1,17E-09 | 1,00E+00 | 1,00E+00 | Sema5b        | 1,03 | No  |
| ENSMUSG00000052137 | 1,46E-02  | 3,648646477  | 2,41E-02  | 8,77E-01 | 1,00E+00 | Rbm12b2       | 1,01 | No  |
| ENSMUSG00000052139 | -1,65E-02 | 4,290196992  | 3,86E-02  | 8,44E-01 | 9,86E-01 | Babam2        | 0,99 | No  |
| ENSMUSG00000052142 | 2,13E-01  | 6,649868062  | 1,17E+01  | 6,20E-04 | 1,10E-02 | Rasal3        | 1,16 | Yes |
| ENSMUSG00000052143 | 1,84E+00  | -3,033649193 | 1,33E+00  | 2,49E-01 | 5,50E-01 | Gm9869        | 3,58 | No  |
| ENSMUSG00000052144 | -1,71E-02 | 5,556269123  | 6,26E-02  | 8,02E-01 | 9,62E-01 | Ppp4r2        | 0,99 | No  |
| ENSMUSG00000052146 | -2,14E-01 | 4,783902378  | 7,78E+00  | 5,30E-03 | 5,83E-02 | Rps10         | 0,86 | No  |
| ENSMUSG00000052151 | 5,93E-02  | 5,566652183  | 7,47E-01  | 3,87E-01 | 6,87E-01 | Plpp2         | 1,04 | No  |
| ENSMUSG00000052154 | -1,63E-02 | 2,293910649  | 1,37E-02  | 9,07E-01 | 1,00E+00 | Gm9870        | 0,99 | No  |

|                    |           |              |           |          |          |               |      |     |
|--------------------|-----------|--------------|-----------|----------|----------|---------------|------|-----|
| ENSMUSG00000052155 | -1,81E-01 | 4,247584045  | 4,48E+00  | 3,43E-02 | 2,18E-01 | Acvr2a        | 0,88 | No  |
| ENSMUSG00000052160 | 1,73E-01  | 8,411123252  | 9,06E+00  | 2,61E-03 | 3,44E-02 | Pld4          | 1,13 | Yes |
| ENSMUSG00000052187 | -1,30E+00 | 0,742829656  | 3,42E+01  | 5,01E-09 | 3,67E-07 | Hbb-y         | 0,41 | Yes |
| ENSMUSG00000052188 | 4,81E-01  | -2,247093602 | 3,14E-01  | 5,75E-01 | 8,34E-01 | Gm14964       | 1,40 | No  |
| ENSMUSG00000052192 | -3,11E-01 | 6,682683038  | 2,53E+01  | 4,98E-07 | 2,37E-05 | Gm5963        | 0,81 | Yes |
| ENSMUSG00000052212 | -4,21E-01 | -0,641221178 | 1,35E+00  | 2,45E-01 | 5,50E-01 | Cd177         | 0,75 | No  |
| ENSMUSG00000052214 | 9,02E-02  | 5,892942772  | 1,86E+00  | 1,73E-01 | 5,29E-01 | Opa3          | 1,06 | No  |
| ENSMUSG00000052221 | -3,83E-02 | -3,107651936 | -7,91E-11 | 1,00E+00 | 1,00E+00 | Ppp1r36       | 0,97 | No  |
| ENSMUSG00000052229 | 4,49E-01  | -2,522745037 | 2,15E-01  | 6,43E-01 | 8,71E-01 | Gpr17         | 1,37 | No  |
| ENSMUSG00000052234 | -1,54E+00 | 0,710275666  | 4,74E+01  | 5,79E-12 | 6,41E-10 | Epx           | 0,34 | Yes |
| ENSMUSG00000052236 | -2,63E-02 | -3,033641358 | 2,33E-04  | 9,88E-01 | 1,00E+00 | Gm9871        | 0,98 | No  |
| ENSMUSG00000052241 | 8,49E-02  | -0,648229819 | 5,49E-02  | 8,15E-01 | 9,68E-01 | A930035D04Rik | 1,06 | No  |
| ENSMUSG00000052248 | 2,19E-01  | 3,385379005  | 4,46E+00  | 3,47E-02 | 2,20E-01 | Zeb2os        | 1,16 | No  |
| ENSMUSG00000052253 | -1,30E-01 | 6,561742974  | 4,31E+00  | 3,79E-02 | 2,31E-01 | Zfp622        | 0,91 | No  |
| ENSMUSG00000052270 | -2,90E-02 | 4,733096938  | 1,38E-01  | 7,10E-01 | 9,09E-01 | Fpr2          | 0,98 | No  |
| ENSMUSG00000052271 | -3,53E-01 | -0,697150599 | 7,38E-01  | 3,90E-01 | 6,90E-01 | Bhlha15       | 0,78 | No  |
| ENSMUSG00000052273 | -1,46E+00 | -2,522701177 | 2,20E+00  | 1,38E-01 | 4,69E-01 | Dnah3         | 0,36 | No  |
| ENSMUSG00000052276 | -1,89E+00 | -3,1076441   | 1,42E+00  | 2,33E-01 | 5,50E-01 | Ostn          | 0,27 | No  |
| ENSMUSG00000052281 | 5,94E-02  | -0,548223089 | 2,75E-02  | 8,68E-01 | 1,00E+00 | Tspan32os     | 1,04 | No  |
| ENSMUSG00000052291 | -1,43E-01 | 1,109981646  | 5,10E-01  | 4,75E-01 | 7,63E-01 | 5330438D12Rik | 0,91 | No  |
| ENSMUSG00000052293 | -9,92E-02 | 4,583948134  | 1,55E+00  | 2,13E-01 | 5,50E-01 | Taf9          | 0,93 | No  |
| ENSMUSG00000052295 | 3,14E-02  | -3,107617333 | -7,69E-10 | 1,00E+00 | 1,00E+00 | 8030423F21Rik | 1,02 | No  |
| ENSMUSG00000052296 | 9,72E-02  | 7,492230406  | 2,68E+00  | 1,01E-01 | 3,94E-01 | Ppp6r1        | 1,07 | No  |
| ENSMUSG00000052298 | 6,92E-02  | 7,9729714    | 1,41E+00  | 2,35E-01 | 5,50E-01 | Cdc42se2      | 1,05 | No  |
| ENSMUSG00000052299 | 1,31E-01  | 6,213834714  | 4,14E+00  | 4,19E-02 | 2,43E-01 | Ltn1          | 1,09 | No  |
| ENSMUSG00000052301 | 1,05E-01  | 3,286794678  | 9,97E-01  | 3,18E-01 | 6,19E-01 | Doc2a         | 1,08 | No  |
| ENSMUSG00000052302 | -8,27E-02 | 1,50233689   | 2,29E-01  | 6,32E-01 | 8,64E-01 | Tbc1d30       | 0,94 | No  |
| ENSMUSG00000052303 | 1,87E+00  | -3,107639691 | 1,38E+00  | 2,40E-01 | 5,50E-01 | Mrgpra6       | 3,67 | No  |
| ENSMUSG00000052305 | -8,45E-01 | -0,037843934 | 7,44E+00  | 6,39E-03 | 6,72E-02 | Hbb-bs        | 0,56 | No  |
| ENSMUSG00000052310 | 5,73E-02  | 7,272342493  | 9,18E-01  | 3,38E-01 | 6,38E-01 | Slc39a1       | 1,04 | No  |
| ENSMUSG00000052316 | -7,38E-02 | -3,033634644 | 2,66E-03  | 9,59E-01 | 1,00E+00 | Lrrc15        | 0,95 | No  |
| ENSMUSG00000052331 | -2,03E-01 | 7,418562188  | 1,17E+01  | 6,24E-04 | 1,10E-02 | Ankrd44       | 0,87 | Yes |

|                    |           |              |          |          |          |               |      |     |
|--------------------|-----------|--------------|----------|----------|----------|---------------|------|-----|
| ENSMUSG00000052336 | 1,03E-02  | -0,479146822 | 9,30E-04 | 9,76E-01 | 1,00E+00 | Cx3cr1        | 1,01 | No  |
| ENSMUSG00000052337 | 7,33E-02  | 6,827983697  | 1,43E+00 | 2,32E-01 | 5,50E-01 | Immt          | 1,05 | No  |
| ENSMUSG00000052353 | -1,75E+00 | -2,770579957 | 2,13E+00 | 1,44E-01 | 4,80E-01 | Cemip         | 0,30 | No  |
| ENSMUSG00000052363 | 1,87E+00  | -3,033632735 | 1,36E+00 | 2,43E-01 | 5,50E-01 | Zdhhc19       | 3,66 | No  |
| ENSMUSG00000052368 | -2,18E+00 | -2,355535296 | 6,16E+00 | 1,31E-02 | 1,14E-01 | Gm9873        | 0,22 | No  |
| ENSMUSG00000052369 | -7,88E-02 | 4,068748055  | 8,16E-01 | 3,66E-01 | 6,67E-01 | Tmem106c      | 0,95 | No  |
| ENSMUSG00000052373 | 4,35E-01  | -2,600703706 | 1,48E-01 | 7,01E-01 | 9,05E-01 | Mpp3          | 1,35 | No  |
| ENSMUSG00000052374 | 7,98E-01  | -2,548208861 | 5,54E-01 | 4,57E-01 | 7,46E-01 | Actn2         | 1,74 | No  |
| ENSMUSG00000052384 | 1,24E-01  | 8,67523828   | 4,68E+00 | 3,05E-02 | 2,01E-01 | Nrros         | 1,09 | No  |
| ENSMUSG00000052387 | -8,78E-01 | -1,600733606 | 2,60E+00 | 1,07E-01 | 4,00E-01 | Trpm3         | 0,54 | No  |
| ENSMUSG00000052392 | -8,05E-01 | -1,401216321 | 2,32E+00 | 1,28E-01 | 4,49E-01 | Acot4         | 0,57 | No  |
| ENSMUSG00000052395 | 8,37E-02  | 4,434744624  | 1,07E+00 | 3,00E-01 | 5,96E-01 | Rft1          | 1,06 | No  |
| ENSMUSG00000052396 | -7,17E-02 | -2,448702469 | 5,88E-03 | 9,39E-01 | 1,00E+00 | Mogat2        | 0,95 | No  |
| ENSMUSG00000052397 | 7,90E-02  | 8,022510044  | 1,84E+00 | 1,75E-01 | 5,33E-01 | Ezr           | 1,06 | No  |
| ENSMUSG00000052403 | -2,08E-01 | -0,793441667 | 2,81E-01 | 5,96E-01 | 8,45E-01 | Fcnaos        | 0,87 | No  |
| ENSMUSG00000052406 | -4,92E-02 | 5,520762923  | 5,13E-01 | 4,74E-01 | 7,62E-01 | Rexo4         | 0,97 | No  |
| ENSMUSG00000052407 | 1,55E-01  | 2,101942027  | 1,13E+00 | 2,87E-01 | 5,83E-01 | Ccdc171       | 1,11 | No  |
| ENSMUSG00000052414 | 4,43E-02  | 2,290640289  | 1,06E-01 | 7,44E-01 | 9,29E-01 | Gm28047       | 1,03 | No  |
| ENSMUSG00000052415 | 3,47E-01  | 3,115501964  | 1,02E+01 | 1,42E-03 | 2,14E-02 | Tchh          | 1,27 | Yes |
| ENSMUSG00000052419 | 2,31E-02  | 6,030962901  | 1,26E-01 | 7,23E-01 | 9,17E-01 | 2610001J05Rik | 1,02 | No  |
| ENSMUSG00000052423 | 2,56E-02  | 4,519380763  | 1,03E-01 | 7,48E-01 | 9,30E-01 | B4galt3       | 1,02 | No  |
| ENSMUSG00000052426 | -7,70E-02 | -2,8010042   | 4,04E-03 | 9,49E-01 | 1,00E+00 | Gm9877        | 0,95 | No  |
| ENSMUSG00000052428 | 9,45E-02  | 5,892535225  | 2,03E+00 | 1,54E-01 | 4,97E-01 | Tmco1         | 1,07 | No  |
| ENSMUSG00000052430 | -1,22E+00 | -2,711725084 | 1,43E+00 | 2,32E-01 | 5,50E-01 | Bmpr1b        | 0,43 | No  |
| ENSMUSG00000052435 | -4,98E-01 | 0,947733331  | 5,71E+00 | 1,69E-02 | 1,36E-01 | Cebpe         | 0,71 | No  |
| ENSMUSG00000052446 | 8,67E-02  | 3,247654585  | 7,05E-01 | 4,01E-01 | 6,99E-01 | Zfp961        | 1,06 | No  |
| ENSMUSG00000052456 | -2,87E-02 | 6,230622218  | 2,00E-01 | 6,55E-01 | 8,79E-01 | Asna1         | 0,98 | No  |
| ENSMUSG00000052459 | 9,26E-02  | 8,1750059    | 2,56E+00 | 1,10E-01 | 4,06E-01 | Atp6v1a       | 1,07 | No  |
| ENSMUSG00000052468 | 1,08E+00  | -3,033648223 | 5,01E-01 | 4,79E-01 | 7,66E-01 | Pmp2          | 2,11 | No  |
| ENSMUSG00000052469 | -8,65E-02 | -2,497642005 | 8,60E-03 | 9,26E-01 | 1,00E+00 | Tcp10c        | 0,94 | No  |
| ENSMUSG00000052471 | -2,63E-02 | -3,033641358 | 2,33E-04 | 9,88E-01 | 1,00E+00 | Gm9881        | 0,98 | No  |
| ENSMUSG00000052477 | -5,82E-01 | 3,135779597  | 2,83E+01 | 1,03E-07 | 5,70E-06 | C130026I21Rik | 0,67 | Yes |

|                    |           |              |          |          |          |               |      |     |
|--------------------|-----------|--------------|----------|----------|----------|---------------|------|-----|
| ENSMUSG00000052479 | 2,65E+00  | -3,033655087 | 2,73E+00 | 9,86E-02 | 3,91E-01 | A330008L17Rik | 6,30 | No  |
| ENSMUSG00000052482 | 3,78E-03  | -1,655104728 | 4,47E-05 | 9,95E-01 | 1,00E+00 | Gm8174        | 1,00 | No  |
| ENSMUSG00000052485 | 2,76E-01  | 0,721281317  | 1,37E+00 | 2,41E-01 | 5,50E-01 | Tmem171       | 1,21 | No  |
| ENSMUSG00000052488 | 3,69E-02  | 6,553222719  | 3,49E-01 | 5,55E-01 | 8,20E-01 | Cherp         | 1,03 | No  |
| ENSMUSG00000052504 | 2,65E+00  | -2,831982301 | 2,71E+00 | 9,98E-02 | 3,92E-01 | Epha3         | 6,28 | No  |
| ENSMUSG00000052512 | -2,37E-01 | 3,197230269  | 4,83E+00 | 2,79E-02 | 1,89E-01 | Nav2          | 0,85 | No  |
| ENSMUSG00000052516 | 1,24E+00  | -2,448693055 | 9,49E-01 | 3,30E-01 | 6,30E-01 | Robo2         | 2,36 | No  |
| ENSMUSG00000052525 | 9,31E-02  | 0,382587132  | 1,37E-01 | 7,11E-01 | 9,10E-01 | Spdya         | 1,07 | No  |
| ENSMUSG00000052533 | 1,56E-01  | 5,682824754  | 5,27E+00 | 2,16E-02 | 1,58E-01 | Nup188        | 1,11 | No  |
| ENSMUSG00000052534 | 2,39E-01  | 3,304133642  | 5,07E+00 | 2,44E-02 | 1,72E-01 | Pbx1          | 1,18 | No  |
| ENSMUSG00000052539 | 1,57E-01  | 2,454487232  | 1,41E+00 | 2,35E-01 | 5,50E-01 | Magi3         | 1,11 | No  |
| ENSMUSG00000052544 | -4,66E-01 | -0,535287953 | 1,68E+00 | 1,95E-01 | 5,50E-01 | St6galnac3    | 0,72 | No  |
| ENSMUSG00000052551 | 1,59E+00  | -2,770645867 | 1,74E+00 | 1,87E-01 | 5,50E-01 | Adarb2        | 3,02 | No  |
| ENSMUSG00000052557 | 8,61E-02  | 5,515748368  | 1,57E+00 | 2,11E-01 | 5,50E-01 | Gan           | 1,06 | No  |
| ENSMUSG00000052560 | -2,57E-01 | 3,757919653  | 7,52E+00 | 6,09E-03 | 6,49E-02 | Cpne8         | 0,84 | No  |
| ENSMUSG00000052563 | 2,56E-01  | 3,127330639  | 5,53E+00 | 1,87E-02 | 1,45E-01 | D930048N14Rik | 1,19 | No  |
| ENSMUSG00000052565 | 1,07E-03  | 2,656802159  | 7,35E-05 | 9,93E-01 | 1,00E+00 | Hist1h1d      | 1,00 | No  |
| ENSMUSG00000052566 | -2,18E-01 | 3,403179525  | 4,66E+00 | 3,09E-02 | 2,03E-01 | Hook2         | 0,86 | No  |
| ENSMUSG00000052572 | -6,45E-02 | -2,548244769 | 3,79E-03 | 9,51E-01 | 1,00E+00 | Dlg2          | 0,96 | No  |
| ENSMUSG00000052584 | 1,89E+00  | -2,711792085 | 2,66E+00 | 1,03E-01 | 3,95E-01 | Serp2         | 3,70 | No  |
| ENSMUSG00000052593 | 9,41E-02  | 7,544088519  | 2,53E+00 | 1,12E-01 | 4,11E-01 | Adam17        | 1,07 | No  |
| ENSMUSG00000052595 | -8,34E-01 | -2,963223097 | 3,81E-01 | 5,37E-01 | 8,09E-01 | A1cf          | 0,56 | No  |
| ENSMUSG00000052605 | 2,77E-02  | 2,29558518   | 3,98E-02 | 8,42E-01 | 9,85E-01 | Isoc2b        | 1,02 | No  |
| ENSMUSG00000052609 | 3,78E-01  | 5,246992625  | 2,76E+01 | 1,50E-07 | 8,02E-06 | Plekhg3       | 1,30 | Yes |
| ENSMUSG00000052613 | 8,14E-01  | -0,311257626 | 5,79E+00 | 1,61E-02 | 1,32E-01 | Pcdh15        | 1,76 | No  |
| ENSMUSG00000052616 | -5,79E-01 | -2,711686467 | 2,63E-01 | 6,08E-01 | 8,51E-01 | Terb1         | 0,67 | No  |
| ENSMUSG00000052631 | 2,00E-01  | -1,35547271  | 1,12E-01 | 7,38E-01 | 9,26E-01 | Sh2d6         | 1,15 | No  |
| ENSMUSG00000052632 | -1,28E-01 | 4,704208825  | 2,78E+00 | 9,54E-02 | 3,86E-01 | Asap2         | 0,91 | No  |
| ENSMUSG00000052656 | 7,00E-02  | 5,094726885  | 9,35E-01 | 3,34E-01 | 6,34E-01 | Rnf103        | 1,05 | No  |
| ENSMUSG00000052658 | 2,24E-01  | -2,185665995 | 6,34E-02 | 8,01E-01 | 9,61E-01 | 5830454E08Rik | 1,17 | No  |
| ENSMUSG00000052673 | 9,94E-02  | 3,832057775  | 1,16E+00 | 2,80E-01 | 5,77E-01 | Gm9887        | 1,07 | No  |
| ENSMUSG00000052675 | -3,23E-02 | 1,175768964  | 2,57E-02 | 8,73E-01 | 1,00E+00 | Zfp112        | 0,98 | No  |



|                    |           |              |           |          |          |               |      |     |
|--------------------|-----------|--------------|-----------|----------|----------|---------------|------|-----|
| ENSMUSG00000052681 | -2,71E-03 | 8,274894269  | 2,20E-03  | 9,63E-01 | 1,00E+00 | Rap1b         | 1,00 | No  |
| ENSMUSG00000052684 | 4,49E-01  | 6,499197323  | 5,13E+01  | 7,97E-13 | 9,83E-11 | Jun           | 1,37 | Yes |
| ENSMUSG00000052688 | 3,59E-01  | 6,364337089  | 3,18E+01  | 1,69E-08 | 1,11E-06 | Rab7b         | 1,28 | Yes |
| ENSMUSG00000052698 | 3,72E-01  | 4,917950236  | 2,39E+01  | 1,01E-06 | 4,49E-05 | Tln2          | 1,29 | Yes |
| ENSMUSG00000052707 | 5,27E-03  | 6,55937428   | 7,16E-03  | 9,33E-01 | 1,00E+00 | Tnrc6a        | 1,00 | No  |
| ENSMUSG00000052712 | 1,11E-02  | 5,656092807  | 2,65E-02  | 8,71E-01 | 1,00E+00 | BC004004      | 1,01 | No  |
| ENSMUSG00000052713 | 7,29E-02  | 5,209002112  | 9,89E-01  | 3,20E-01 | 6,20E-01 | Zfp608        | 1,05 | No  |
| ENSMUSG00000052724 | -4,20E-02 | 3,10566043   | 1,40E-01  | 7,08E-01 | 9,09E-01 | Gm9888        | 0,97 | No  |
| ENSMUSG00000052727 | -3,46E-01 | -0,126743029 | 1,31E+00  | 2,53E-01 | 5,50E-01 | Map1b         | 0,79 | No  |
| ENSMUSG00000052730 | 4,60E-01  | -2,711710286 | 1,65E-01  | 6,84E-01 | 8,96E-01 | Gm5111        | 1,38 | No  |
| ENSMUSG00000052736 | 1,22E+00  | -2,770593231 | 9,26E-01  | 3,36E-01 | 6,37E-01 | Klrc2         | 2,33 | No  |
| ENSMUSG00000052738 | -6,01E-02 | 5,742700199  | 7,98E-01  | 3,72E-01 | 6,73E-01 | Suclg1        | 0,96 | No  |
| ENSMUSG00000052748 | -1,05E-01 | 3,29641596   | 1,04E+00  | 3,08E-01 | 6,07E-01 | Swt1          | 0,93 | No  |
| ENSMUSG00000052749 | 5,96E-02  | 2,097482474  | 1,75E-01  | 6,76E-01 | 8,91E-01 | Trim30b       | 1,04 | No  |
| ENSMUSG00000052751 | 2,42E-03  | 3,436077892  | 5,96E-04  | 9,81E-01 | 1,00E+00 | Repin1        | 1,00 | No  |
| ENSMUSG00000052752 | 1,02E-02  | 6,343496284  | 2,60E-02  | 8,72E-01 | 1,00E+00 | Traf7         | 1,01 | No  |
| ENSMUSG00000052759 | 1,81E+00  | -3,10765737  | 1,28E+00  | 2,58E-01 | 5,50E-01 | Gpr25         | 3,49 | No  |
| ENSMUSG00000052760 | 8,31E-02  | 4,615225056  | 1,13E+00  | 2,88E-01 | 5,84E-01 | A630001G21Rik | 1,06 | No  |
| ENSMUSG00000052763 | 4,66E-02  | 4,391692987  | 3,27E-01  | 5,67E-01 | 8,29E-01 | Zfp212        | 1,03 | No  |
| ENSMUSG00000052769 | 3,14E-02  | -3,107617333 | -7,69E-10 | 1,00E+00 | 1,00E+00 | Gm9889        | 1,02 | No  |
| ENSMUSG00000052776 | -1,88E-03 | 5,259662199  | 6,99E-04  | 9,79E-01 | 1,00E+00 | Oas1a         | 1,00 | No  |
| ENSMUSG00000052783 | 4,37E-02  | 0,856041832  | 4,33E-02  | 8,35E-01 | 9,80E-01 | Grk4          | 1,03 | No  |
| ENSMUSG00000052794 | 4,79E-02  | 3,701293593  | 2,58E-01  | 6,12E-01 | 8,52E-01 | 1700030K09Rik | 1,03 | No  |
| ENSMUSG00000052798 | 3,62E-02  | 4,417794582  | 1,96E-01  | 6,58E-01 | 8,81E-01 | Nup107        | 1,03 | No  |
| ENSMUSG00000052812 | 2,44E-02  | 6,120477385  | 1,42E-01  | 7,07E-01 | 9,08E-01 | Atad2b        | 1,02 | No  |
| ENSMUSG00000052819 | -2,63E-02 | -3,033653157 | 2,33E-04  | 9,88E-01 | 1,00E+00 | Best2         | 0,98 | No  |
| ENSMUSG00000052825 | -3,18E-02 | 6,247278267  | 2,47E-01  | 6,19E-01 | 8,56E-01 | Gm9892        | 0,98 | No  |
| ENSMUSG00000052833 | 1,00E-01  | 6,70317141   | 2,63E+00  | 1,05E-01 | 3,97E-01 | Sae1          | 1,07 | No  |
| ENSMUSG00000052837 | 7,54E-02  | 8,174782596  | 1,68E+00  | 1,94E-01 | 5,50E-01 | Junb          | 1,05 | No  |
| ENSMUSG00000052850 | -3,95E-02 | -2,963274761 | 7,08E-04  | 9,79E-01 | 1,00E+00 | Tas2r137      | 0,97 | No  |
| ENSMUSG00000052852 | -7,50E-01 | -0,300276367 | 5,13E+00  | 2,35E-02 | 1,68E-01 | Reep1         | 0,59 | No  |
| ENSMUSG00000052861 | -5,63E-01 | -0,038113397 | 3,67E+00  | 5,53E-02 | 2,88E-01 | Dnah6         | 0,68 | No  |

|                    |           |              |           |          |          |            |      |     |
|--------------------|-----------|--------------|-----------|----------|----------|------------|------|-----|
| ENSMUSG00000052865 | 2,65E+00  | -3,033664155 | 2,71E+00  | 9,96E-02 | 3,92E-01 | Gm13619    | 6,26 | No  |
| ENSMUSG00000052889 | -5,54E-03 | 7,200974668  | 8,47E-03  | 9,27E-01 | 1,00E+00 | Prkcb      | 1,00 | No  |
| ENSMUSG00000052906 | -8,52E-02 | 4,085746081  | 9,56E-01  | 3,28E-01 | 6,29E-01 | Ubxn8      | 0,94 | No  |
| ENSMUSG00000052909 | -3,24E+00 | -2,770558382 | 4,41E+00  | 3,57E-02 | 2,24E-01 | Gm9894     | 0,11 | No  |
| ENSMUSG00000052911 | 4,21E-01  | 0,616226105  | 2,85E+00  | 9,13E-02 | 3,82E-01 | Lamb2      | 1,34 | No  |
| ENSMUSG00000052912 | 2,34E-02  | 3,721543616  | 6,19E-02  | 8,03E-01 | 9,62E-01 | Smarca5-ps | 1,02 | No  |
| ENSMUSG00000052914 | 3,42E-01  | 1,330491608  | 3,24E+00  | 7,20E-02 | 3,40E-01 | Cyp2j6     | 1,27 | No  |
| ENSMUSG00000052915 | 3,79E-02  | 6,557071158  | 3,71E-01  | 5,43E-01 | 8,12E-01 | Msl1       | 1,03 | No  |
| ENSMUSG00000052917 | -1,65E-01 | 4,534051886  | 4,36E+00  | 3,67E-02 | 2,28E-01 | Senp7      | 0,89 | No  |
| ENSMUSG00000052920 | -2,03E+00 | -2,600638559 | 3,11E+00  | 7,79E-02 | 3,56E-01 | Prkg1      | 0,25 | No  |
| ENSMUSG00000052921 | -4,58E-02 | -2,60063022  | 1,91E-03  | 9,65E-01 | 1,00E+00 | Arhgef15   | 0,97 | No  |
| ENSMUSG00000052922 | -1,87E+00 | -3,107637761 | 1,39E+00  | 2,38E-01 | 5,50E-01 | Bpi        | 0,27 | No  |
| ENSMUSG00000052926 | -1,21E-01 | 4,539563485  | 2,30E+00  | 1,29E-01 | 4,51E-01 | Rnaseh2a   | 0,92 | No  |
| ENSMUSG00000052928 | 4,55E-02  | 3,518174431  | 2,09E-01  | 6,48E-01 | 8,75E-01 | Ctif       | 1,03 | No  |
| ENSMUSG00000052934 | 2,13E-01  | 4,235431866  | 6,32E+00  | 1,19E-02 | 1,06E-01 | Fbxo31     | 1,16 | No  |
| ENSMUSG00000052942 | -1,02E-01 | 0,095591224  | 1,29E-01  | 7,19E-01 | 9,15E-01 | Glis3      | 0,93 | No  |
| ENSMUSG00000052949 | 2,62E-01  | 2,845969709  | 4,81E+00  | 2,83E-02 | 1,91E-01 | Rnf157     | 1,20 | No  |
| ENSMUSG00000052955 | 3,00E-01  | -2,497613611 | 9,14E-02  | 7,62E-01 | 9,38E-01 | Cpvl       | 1,23 | No  |
| ENSMUSG00000052957 | -9,97E-01 | -2,088709893 | 1,70E+00  | 1,92E-01 | 5,50E-01 | Gas1       | 0,50 | No  |
| ENSMUSG00000052962 | -1,01E-01 | 4,13944812   | 1,37E+00  | 2,42E-01 | 5,50E-01 | Mrpl35     | 0,93 | No  |
| ENSMUSG00000052974 | 3,14E-02  | -3,107617333 | -7,69E-10 | 1,00E+00 | 1,00E+00 | Cyp2f2     | 1,02 | No  |
| ENSMUSG00000052981 | -7,21E-01 | -1,246999339 | 2,43E+00  | 1,19E-01 | 4,30E-01 | Ube2ql1    | 0,61 | No  |
| ENSMUSG00000052997 | 4,37E-02  | 6,236862907  | 4,63E-01  | 4,96E-01 | 7,82E-01 | Uba2       | 1,03 | No  |
| ENSMUSG00000053004 | 5,15E-01  | 2,287894519  | 1,40E+01  | 1,81E-04 | 3,99E-03 | Hrh1       | 1,43 | Yes |
| ENSMUSG00000053007 | 1,52E-01  | 7,208305448  | 6,40E+00  | 1,14E-02 | 1,03E-01 | Creb5      | 1,11 | No  |
| ENSMUSG00000053012 | 2,77E-02  | 6,011916976  | 1,80E-01  | 6,71E-01 | 8,89E-01 | Krcc1      | 1,02 | No  |
| ENSMUSG00000053024 | -8,32E-01 | -2,896102534 | 3,79E-01  | 5,38E-01 | 8,09E-01 | Cntn2      | 0,56 | No  |
| ENSMUSG00000053025 | 3,13E-01  | 1,13803527   | 2,62E+00  | 1,05E-01 | 3,98E-01 | Sv2b       | 1,24 | No  |
| ENSMUSG00000053030 | 6,91E-01  | 0,742347295  | 8,54E+00  | 3,48E-03 | 4,27E-02 | Spink2     | 1,61 | Yes |
| ENSMUSG00000053038 | -1,21E-01 | 9,269848717  | 4,58E+00  | 3,24E-02 | 2,10E-01 | Gm6180     | 0,92 | No  |
| ENSMUSG00000053040 | 1,05E-01  | 6,125082571  | 2,63E+00  | 1,05E-01 | 3,97E-01 | Aph1c      | 1,08 | No  |
| ENSMUSG00000053046 | -5,83E-01 | -2,770617645 | 2,67E-01  | 6,05E-01 | 8,49E-01 | Brsk2      | 0,67 | No  |

|                    |           |              |          |          |          |               |      |     |
|--------------------|-----------|--------------|----------|----------|----------|---------------|------|-----|
| ENSMUSG00000053049 | -3,54E+00 | -2,896134066 | 5,62E+00 | 1,77E-02 | 1,39E-01 | Gm15413       | 0,09 | No  |
| ENSMUSG00000053062 | -2,81E-01 | -0,069886797 | 9,95E-01 | 3,19E-01 | 6,19E-01 | Jam2          | 0,82 | No  |
| ENSMUSG00000053063 | 7,06E-02  | 5,79902297   | 1,11E+00 | 2,92E-01 | 5,87E-01 | Clec12a       | 1,05 | No  |
| ENSMUSG00000053070 | -2,63E-02 | -3,033653157 | 2,33E-04 | 9,88E-01 | 1,00E+00 | 9230110C19Rik | 0,98 | No  |
| ENSMUSG00000053080 | -2,93E-01 | 1,394339265  | 2,84E+00 | 9,18E-02 | 3,82E-01 | 2700081O15Rik | 0,82 | No  |
| ENSMUSG00000053081 | -2,48E-01 | -0,808634234 | 4,05E-01 | 5,24E-01 | 8,01E-01 | 1700069B07Rik | 0,84 | No  |
| ENSMUSG00000053091 | 1,41E-01  | 3,568441676  | 2,05E+00 | 1,52E-01 | 4,94E-01 | Lins1         | 1,10 | No  |
| ENSMUSG00000053093 | -5,94E-01 | -0,309339536 | 3,38E+00 | 6,62E-02 | 3,23E-01 | Myh7          | 0,66 | No  |
| ENSMUSG00000053094 | -2,02E-02 | 5,910510905  | 9,28E-02 | 7,61E-01 | 9,37E-01 | Tmem248       | 0,99 | No  |
| ENSMUSG00000053101 | 3,66E-02  | 6,959182365  | 3,63E-01 | 5,47E-01 | 8,14E-01 | Gpr141        | 1,03 | No  |
| ENSMUSG00000053110 | 3,11E-01  | -1,247143371 | 4,25E-01 | 5,14E-01 | 7,96E-01 | Yap1          | 1,24 | No  |
| ENSMUSG00000053111 | -9,10E-01 | -2,770628777 | 7,21E-01 | 3,96E-01 | 6,96E-01 | Fank1         | 0,53 | No  |
| ENSMUSG00000053113 | 5,01E-01  | 7,123842418  | 6,83E+01 | 1,42E-16 | 2,49E-14 | Socs3         | 1,41 | Yes |
| ENSMUSG00000053117 | 7,46E-01  | -2,770577216 | 3,02E-01 | 5,82E-01 | 8,38E-01 | E330013P04Rik | 1,68 | No  |
| ENSMUSG00000053119 | 1,11E-02  | 6,098345231  | 2,94E-02 | 8,64E-01 | 9,97E-01 | Chmp3         | 1,01 | No  |
| ENSMUSG00000053121 | 1,60E+00  | -2,71177803  | 1,75E+00 | 1,85E-01 | 5,49E-01 | Gm5129        | 3,03 | No  |
| ENSMUSG00000053128 | 2,11E-01  | 4,482032685  | 6,81E+00 | 9,09E-03 | 8,70E-02 | Rnf26         | 1,16 | No  |
| ENSMUSG00000053134 | -5,28E-02 | 4,696932562  | 4,65E-01 | 4,95E-01 | 7,81E-01 | Supt7l        | 0,96 | No  |
| ENSMUSG00000053137 | 5,03E-01  | -0,156097472 | 2,76E+00 | 9,64E-02 | 3,88E-01 | Mapk11        | 1,42 | No  |
| ENSMUSG00000053158 | 1,35E-01  | 7,971902395  | 5,36E+00 | 2,06E-02 | 1,54E-01 | Fes           | 1,10 | No  |
| ENSMUSG00000053164 | 9,01E-01  | -1,49778074  | 2,60E+00 | 1,07E-01 | 4,00E-01 | Gpr21         | 1,87 | No  |
| ENSMUSG00000053166 | -6,40E-02 | -1,401393187 | 1,82E-02 | 8,93E-01 | 1,00E+00 | Cdh22         | 0,96 | No  |
| ENSMUSG00000053168 | -3,57E+00 | -2,711628139 | 5,73E+00 | 1,66E-02 | 1,34E-01 | 9030619P08Rik | 0,08 | No  |
| ENSMUSG00000053173 | -1,42E-01 | 7,650331484  | 5,82E+00 | 1,58E-02 | 1,31E-01 | Rpl18-ps2     | 0,91 | No  |
| ENSMUSG00000053175 | -2,13E-01 | 4,051712587  | 6,07E+00 | 1,37E-02 | 1,18E-01 | Bcl3          | 0,86 | No  |
| ENSMUSG00000053178 | -7,65E-01 | -0,146047994 | 6,51E+00 | 1,07E-02 | 9,83E-02 | Mterf1b       | 0,59 | No  |
| ENSMUSG00000053181 | -9,13E-02 | -2,226361631 | 1,15E-02 | 9,15E-01 | 1,00E+00 | A830005F24Rik | 0,94 | No  |
| ENSMUSG00000053182 | 8,28E-02  | -0,719064943 | 4,70E-02 | 8,28E-01 | 9,76E-01 | Gm609         | 1,06 | No  |
| ENSMUSG00000053184 | 1,81E+00  | -3,10765737  | 1,28E+00 | 2,58E-01 | 5,50E-01 | Spaca3        | 3,49 | No  |
| ENSMUSG00000053192 | 1,49E-01  | 3,489467559  | 2,30E+00 | 1,29E-01 | 4,51E-01 | Mllt11        | 1,11 | No  |
| ENSMUSG00000053198 | -1,90E-01 | 0,464654676  | 5,75E-01 | 4,48E-01 | 7,38E-01 | Prx           | 0,88 | No  |
| ENSMUSG00000053199 | 1,81E+00  | -3,10765737  | 1,28E+00 | 2,58E-01 | 5,50E-01 | Arhgap20      | 3,49 | No  |

|                    |           |              |          |          |          |               |      |     |
|--------------------|-----------|--------------|----------|----------|----------|---------------|------|-----|
| ENSMUSG00000053205 | 4,46E-01  | 0,495967738  | 2,86E+00 | 9,10E-02 | 3,82E-01 | Styx          | 1,36 | No  |
| ENSMUSG00000053208 | 1,85E-02  | 3,196295326  | 2,96E-02 | 8,63E-01 | 9,97E-01 | Kat2b-ps      | 1,01 | No  |
| ENSMUSG00000053216 | -8,07E-01 | -1,015422256 | 3,33E+00 | 6,81E-02 | 3,28E-01 | Btn2a2        | 0,57 | No  |
| ENSMUSG00000053219 | 1,96E-01  | 0,306280148  | 5,09E-01 | 4,76E-01 | 7,64E-01 | Raet1e        | 1,15 | No  |
| ENSMUSG00000053226 | 1,31E-01  | 1,638631771  | 5,81E-01 | 4,46E-01 | 7,37E-01 | Dand5         | 1,09 | No  |
| ENSMUSG00000053251 | -2,81E-02 | -2,963245656 | 3,59E-04 | 9,85E-01 | 1,00E+00 | Olf212        | 0,98 | No  |
| ENSMUSG00000053253 | 1,55E-01  | 5,467095166  | 4,98E+00 | 2,56E-02 | 1,78E-01 | Ndfip2        | 1,11 | No  |
| ENSMUSG00000053263 | 7,48E-03  | 0,959368788  | 1,32E-03 | 9,71E-01 | 1,00E+00 | Gm12592       | 1,01 | No  |
| ENSMUSG00000053279 | 1,85E+00  | -2,963253488 | 1,34E+00 | 2,48E-01 | 5,50E-01 | Aldh1a1       | 3,59 | No  |
| ENSMUSG00000053286 | -4,63E-02 | 4,617843298  | 3,56E-01 | 5,51E-01 | 8,17E-01 | Trmt1l        | 0,97 | No  |
| ENSMUSG00000053289 | 8,35E-02  | 4,379423547  | 1,01E+00 | 3,15E-01 | 6,15E-01 | Ddx10         | 1,06 | No  |
| ENSMUSG00000053291 | 2,35E-02  | 4,438025862  | 8,34E-02 | 7,73E-01 | 9,44E-01 | Rab4b         | 1,02 | No  |
| ENSMUSG00000053293 | 6,01E-02  | 6,226585938  | 8,74E-01 | 3,50E-01 | 6,51E-01 | Pom121        | 1,04 | No  |
| ENSMUSG00000053297 | -6,69E-01 | -1,497471164 | 1,54E+00 | 2,15E-01 | 5,50E-01 | Al854703      | 0,63 | No  |
| ENSMUSG00000053310 | -2,58E-01 | -1,378329702 | 2,33E-01 | 6,29E-01 | 8,62E-01 | Nrgn          | 0,84 | No  |
| ENSMUSG00000053317 | -3,78E-01 | 5,595468564  | 3,09E+01 | 2,76E-08 | 1,74E-06 | Sec61b        | 0,77 | Yes |
| ENSMUSG00000053318 | -1,13E-01 | 4,914376935  | 2,31E+00 | 1,29E-01 | 4,50E-01 | Slamf8        | 0,92 | No  |
| ENSMUSG00000053329 | 6,00E-02  | 5,05851377   | 6,62E-01 | 4,16E-01 | 7,11E-01 | D10Jhu81e     | 1,04 | No  |
| ENSMUSG00000053332 | -1,07E-02 | 4,723058833  | 1,89E-02 | 8,91E-01 | 1,00E+00 | Gas5          | 0,99 | No  |
| ENSMUSG00000053333 | 3,04E-02  | 4,051134657  | 1,21E-01 | 7,28E-01 | 9,20E-01 | Dis3l2        | 1,02 | No  |
| ENSMUSG00000053334 | 4,88E-02  | 3,409842441  | 2,23E-01 | 6,37E-01 | 8,68E-01 | Ficd          | 1,03 | No  |
| ENSMUSG00000053338 | 1,94E-01  | 6,882309378  | 1,00E+01 | 1,55E-03 | 2,29E-02 | Tarm1         | 1,14 | Yes |
| ENSMUSG00000053347 | -2,19E-02 | 3,333011249  | 4,55E-02 | 8,31E-01 | 9,78E-01 | Zfp943        | 0,98 | No  |
| ENSMUSG00000053353 | 5,16E-01  | -1,89615453  | 6,38E-01 | 4,24E-01 | 7,19E-01 | Z310001K24Rik | 1,43 | No  |
| ENSMUSG00000053358 | 3,32E-01  | 1,614482017  | 3,65E+00 | 5,61E-02 | 2,91E-01 | Gm9905        | 1,26 | No  |
| ENSMUSG00000053360 | 1,26E-01  | -1,896122591 | 3,12E-02 | 8,60E-01 | 9,95E-01 | F730035P03Rik | 1,09 | No  |
| ENSMUSG00000053368 | -1,89E+00 | -3,1076441   | 1,42E+00 | 2,33E-01 | 5,50E-01 | Rxfp2         | 0,27 | No  |
| ENSMUSG00000053390 | 9,32E-02  | 3,548983398  | 9,21E-01 | 3,37E-01 | 6,38E-01 | Zfp952        | 1,07 | No  |
| ENSMUSG00000053395 | 2,85E-01  | 3,095508218  | 6,66E+00 | 9,87E-03 | 9,24E-02 | Cacng8        | 1,22 | No  |
| ENSMUSG00000053398 | 1,21E-01  | 3,120305784  | 1,21E+00 | 2,72E-01 | 5,68E-01 | Phgdh         | 1,09 | No  |
| ENSMUSG00000053411 | -6,93E-01 | 4,561970414  | 7,76E+01 | 1,26E-18 | 2,58E-16 | Cbx7          | 0,62 | Yes |
| ENSMUSG00000053414 | 1,85E+00  | -2,770563564 | 1,34E+00 | 2,46E-01 | 5,50E-01 | Hunk          | 3,61 | No  |

|                    |           |              |          |          |          |               |      |     |
|--------------------|-----------|--------------|----------|----------|----------|---------------|------|-----|
| ENSMUSG00000053436 | 1,28E-01  | 7,396101028  | 4,60E+00 | 3,20E-02 | 2,08E-01 | Mapk14        | 1,09 | No  |
| ENSMUSG00000053442 | 5,39E-01  | -0,419117366 | 2,16E+00 | 1,41E-01 | 4,75E-01 | 4930597O21Rik | 1,45 | No  |
| ENSMUSG00000053453 | -1,90E-01 | 4,336436385  | 5,24E+00 | 2,21E-02 | 1,61E-01 | Thoc7         | 0,88 | No  |
| ENSMUSG00000053460 | 1,91E-01  | 3,580434576  | 3,86E+00 | 4,95E-02 | 2,69E-01 | Ggcx          | 1,14 | No  |
| ENSMUSG00000053461 | 3,17E+00  | -2,963263597 | 4,11E+00 | 4,28E-02 | 2,46E-01 | Hhipl2        | 8,99 | No  |
| ENSMUSG00000053465 | -1,87E+00 | -3,033619006 | 1,41E+00 | 2,36E-01 | 5,50E-01 | Hs6st3        | 0,27 | No  |
| ENSMUSG00000053469 | 3,21E-01  | 0,214191703  | 1,22E+00 | 2,69E-01 | 5,65E-01 | Tg            | 1,25 | No  |
| ENSMUSG00000053470 | 1,55E-01  | 5,737288859  | 5,33E+00 | 2,09E-02 | 1,56E-01 | Kdm3a         | 1,11 | No  |
| ENSMUSG00000053472 | -2,21E-01 | 0,036682277  | 5,80E-01 | 4,46E-01 | 7,37E-01 | Gm13534       | 0,86 | No  |
| ENSMUSG00000053475 | 2,60E-01  | -1,963247151 | 1,56E-01 | 6,93E-01 | 9,01E-01 | Tnfaip6       | 1,20 | No  |
| ENSMUSG00000053477 | -8,05E-02 | 5,341788658  | 1,31E+00 | 2,53E-01 | 5,50E-01 | Tcf4          | 0,95 | No  |
| ENSMUSG00000053483 | -2,31E-03 | 4,673312353  | 8,83E-04 | 9,76E-01 | 1,00E+00 | Usp21         | 1,00 | No  |
| ENSMUSG00000053508 | -3,88E-03 | -3,03362684  | 4,02E-12 | 1,00E+00 | 1,00E+00 | BC048502      | 1,00 | No  |
| ENSMUSG00000053510 | 6,22E-02  | 7,113113094  | 1,06E+00 | 3,03E-01 | 5,99E-01 | Nrd1          | 1,04 | No  |
| ENSMUSG00000053522 | 1,60E+00  | -2,832054469 | 1,75E+00 | 1,86E-01 | 5,50E-01 | Lgals7        | 3,03 | No  |
| ENSMUSG00000053536 | -2,50E-02 | 5,633024081  | 1,36E-01 | 7,12E-01 | 9,11E-01 | Cstf2t        | 0,98 | No  |
| ENSMUSG00000053541 | 3,97E-01  | -1,587454969 | 4,72E-01 | 4,92E-01 | 7,78E-01 | Gm4759        | 1,32 | No  |
| ENSMUSG00000053550 | -6,07E-02 | -2,548174731 | 4,20E-03 | 9,48E-01 | 1,00E+00 | Shisa7        | 0,96 | No  |
| ENSMUSG00000053552 | -1,34E+00 | -2,832015733 | 1,12E+00 | 2,89E-01 | 5,85E-01 | Ebf4          | 0,40 | No  |
| ENSMUSG00000053553 | 1,16E-01  | 5,339567183  | 2,67E+00 | 1,02E-01 | 3,94E-01 | 3110082I17Rik | 1,08 | No  |
| ENSMUSG00000053559 | 1,94E-02  | 1,432378234  | 1,09E-02 | 9,17E-01 | 1,00E+00 | Smagp         | 1,01 | No  |
| ENSMUSG00000053560 | 3,93E-01  | 6,055406418  | 3,64E+01 | 1,58E-09 | 1,25E-07 | Ier2          | 1,31 | Yes |
| ENSMUSG00000053565 | -1,52E-01 | 5,915250379  | 5,29E+00 | 2,14E-02 | 1,58E-01 | Eif3k         | 0,90 | No  |
| ENSMUSG00000053574 | -2,97E-01 | -2,165718441 | 1,42E-01 | 7,06E-01 | 9,08E-01 | 4930563E22Rik | 0,81 | No  |
| ENSMUSG00000053580 | 5,67E-03  | 4,362843916  | 4,63E-03 | 9,46E-01 | 1,00E+00 | Tanc2         | 1,00 | No  |
| ENSMUSG00000053581 | 6,77E-03  | 6,836789884  | 1,22E-02 | 9,12E-01 | 1,00E+00 | Zfand2a       | 1,00 | No  |
| ENSMUSG00000053588 | -5,43E-02 | -0,131504938 | 3,25E-02 | 8,57E-01 | 9,94E-01 | A730061H03Rik | 0,96 | No  |
| ENSMUSG00000053600 | 4,81E-03  | 4,021353103  | 2,95E-03 | 9,57E-01 | 1,00E+00 | Zfp472        | 1,00 | No  |
| ENSMUSG00000053603 | -5,86E-01 | -1,614027396 | 9,50E-01 | 3,30E-01 | 6,30E-01 | 4930442H23Rik | 0,67 | No  |
| ENSMUSG00000053604 | 1,86E-02  | 4,129880356  | 4,52E-02 | 8,32E-01 | 9,78E-01 | Rpia          | 1,01 | No  |
| ENSMUSG00000053617 | 3,66E-02  | 4,191321846  | 1,82E-01 | 6,70E-01 | 8,88E-01 | Sh3pxd2a      | 1,03 | No  |
| ENSMUSG00000053641 | -3,70E-01 | 6,520938915  | 3,48E+01 | 3,58E-09 | 2,68E-07 | Dennd4a       | 0,77 | Yes |

|                    |           |              |          |          |          |               |      |     |
|--------------------|-----------|--------------|----------|----------|----------|---------------|------|-----|
| ENSMUSG00000053644 | -1,20E-03 | 2,682480253  | 9,44E-05 | 9,92E-01 | 1,00E+00 | Aldh7a1       | 1,00 | No  |
| ENSMUSG00000053646 | -5,86E-02 | -2,448699739 | 3,14E-03 | 9,55E-01 | 1,00E+00 | Plxnb1        | 0,96 | No  |
| ENSMUSG00000053647 | 6,56E-01  | -0,366908781 | 3,20E+00 | 7,38E-02 | 3,45E-01 | Gper1         | 1,58 | No  |
| ENSMUSG00000053656 | -8,01E-01 | -0,497341809 | 4,84E+00 | 2,78E-02 | 1,88E-01 | Dancr         | 0,57 | No  |
| ENSMUSG00000053675 | -7,39E-01 | -2,497628296 | 6,12E-01 | 4,34E-01 | 7,27E-01 | Tgm5          | 0,60 | No  |
| ENSMUSG00000053684 | 2,83E-02  | 3,387895918  | 7,51E-02 | 7,84E-01 | 9,51E-01 | BC048403      | 1,02 | No  |
| ENSMUSG00000053687 | -3,17E-02 | 7,884048621  | 2,93E-01 | 5,88E-01 | 8,40E-01 | Dpep2         | 0,98 | No  |
| ENSMUSG00000053693 | 1,48E-01  | 2,746992866  | 1,55E+00 | 2,14E-01 | 5,50E-01 | Mast1         | 1,11 | No  |
| ENSMUSG00000053702 | -1,04E+00 | -1,226184515 | 5,24E+00 | 2,20E-02 | 1,61E-01 | Nabl          | 0,49 | No  |
| ENSMUSG00000053706 | -1,57E-01 | 5,309997557  | 5,03E+00 | 2,49E-02 | 1,74E-01 | B430305J03Rik | 0,90 | No  |
| ENSMUSG00000053714 | -6,04E-02 | 3,74292045   | 4,29E-01 | 5,13E-01 | 7,95E-01 | 4732471J01Rik | 0,96 | No  |
| ENSMUSG00000053716 | 3,13E-01  | 4,141679846  | 1,32E+01 | 2,77E-04 | 5,69E-03 | Dusp7         | 1,24 | Yes |
| ENSMUSG00000053719 | 3,60E-01  | 1,305646157  | 3,69E+00 | 5,47E-02 | 2,86E-01 | Klk1b26       | 1,28 | No  |
| ENSMUSG00000053730 | 1,81E-01  | 3,028708566  | 2,66E+00 | 1,03E-01 | 3,95E-01 | Tmem39b       | 1,13 | No  |
| ENSMUSG00000053740 | 4,52E-02  | 4,381873124  | 3,01E-01 | 5,83E-01 | 8,38E-01 | Gm6457        | 1,03 | No  |
| ENSMUSG00000053746 | 1,91E-01  | 3,056294019  | 2,88E+00 | 8,95E-02 | 3,79E-01 | Pthr1         | 1,14 | No  |
| ENSMUSG00000053749 | 8,45E-02  | 1,488538733  | 2,29E-01 | 6,33E-01 | 8,65E-01 | Gm9920        | 1,06 | No  |
| ENSMUSG00000053754 | -1,24E-02 | 7,023982637  | 4,16E-02 | 8,38E-01 | 9,82E-01 | Chd8          | 0,99 | No  |
| ENSMUSG00000053765 | -5,34E-02 | -2,600707582 | 2,60E-03 | 9,59E-01 | 1,00E+00 | Oas1f         | 0,96 | No  |
| ENSMUSG00000053768 | -4,91E-02 | 5,525469846  | 5,05E-01 | 4,77E-01 | 7,65E-01 | Chchd3        | 0,97 | No  |
| ENSMUSG00000053769 | 6,10E-02  | 2,671006919  | 2,45E-01 | 6,21E-01 | 8,57E-01 | Lysmd1        | 1,04 | No  |
| ENSMUSG00000053774 | -1,06E-01 | 5,568378055  | 2,41E+00 | 1,21E-01 | 4,33E-01 | Ubxn7         | 0,93 | No  |
| ENSMUSG00000053799 | 3,70E-02  | 4,680493172  | 2,24E-01 | 6,36E-01 | 8,67E-01 | Exoc6         | 1,03 | No  |
| ENSMUSG00000053801 | 1,72E-01  | 4,019084696  | 3,71E+00 | 5,40E-02 | 2,84E-01 | Grwd1         | 1,13 | No  |
| ENSMUSG00000053819 | 3,21E-01  | 5,476306436  | 2,11E+01 | 4,43E-06 | 1,63E-04 | Camk2d        | 1,25 | Yes |
| ENSMUSG00000053820 | -3,85E-01 | 3,502100503  | 1,50E+01 | 1,10E-04 | 2,64E-03 | Bcl2a1c       | 0,77 | Yes |
| ENSMUSG00000053821 | 1,81E+00  | -3,10765737  | 1,28E+00 | 2,58E-01 | 5,50E-01 | Gm9922        | 3,49 | No  |
| ENSMUSG00000053830 | -9,04E-02 | 3,72312646   | 9,03E-01 | 3,42E-01 | 6,42E-01 | Gm9923        | 0,94 | No  |
| ENSMUSG00000053835 | -1,45E-02 | 3,463623453  | 2,06E-02 | 8,86E-01 | 1,00E+00 | H2-T24        | 0,99 | No  |
| ENSMUSG00000053838 | -7,63E-02 | 5,975227748  | 1,35E+00 | 2,45E-01 | 5,50E-01 | Nudcd3        | 0,95 | No  |
| ENSMUSG00000053841 | 1,03E-01  | 6,780257601  | 2,82E+00 | 9,30E-02 | 3,83E-01 | Txlna         | 1,07 | No  |
| ENSMUSG00000053846 | -7,43E-01 | -1,929245477 | 1,45E+00 | 2,29E-01 | 5,50E-01 | Lipg          | 0,60 | No  |

|                    |           |              |           |          |          |               |      |     |
|--------------------|-----------|--------------|-----------|----------|----------|---------------|------|-----|
| ENSMUSG00000053862 | 3,86E-01  | -2,205885835 | 1,78E-01  | 6,74E-01 | 8,90E-01 | Slc51b        | 1,31 | No  |
| ENSMUSG00000053863 | 2,64E+00  | -2,963288486 | 2,69E+00  | 1,01E-01 | 3,92E-01 | Mepe          | 6,24 | No  |
| ENSMUSG00000053870 | 1,45E-02  | 4,246687528  | 2,97E-02  | 8,63E-01 | 9,97E-01 | Fpgt          | 1,01 | No  |
| ENSMUSG00000053877 | 4,10E-02  | 6,300167792  | 4,14E-01  | 5,20E-01 | 7,99E-01 | Srcap         | 1,03 | No  |
| ENSMUSG00000053886 | -1,01E+00 | 0,650184491  | 1,94E+01  | 1,09E-05 | 3,64E-04 | Sh2d4a        | 0,50 | Yes |
| ENSMUSG00000053889 | 1,67E+00  | -2,311213262 | 4,37E+00  | 3,67E-02 | 2,28E-01 | Kirrel3os     | 3,19 | No  |
| ENSMUSG00000053897 | -9,50E-02 | 2,747969918  | 6,13E-01  | 4,34E-01 | 7,27E-01 | Slc39a8       | 0,94 | No  |
| ENSMUSG00000053898 | -3,76E-02 | 5,678257361  | 3,09E-01  | 5,78E-01 | 8,35E-01 | Ech1          | 0,97 | No  |
| ENSMUSG00000053907 | 5,01E-02  | 7,130847498  | 6,91E-01  | 4,06E-01 | 7,02E-01 | Mat2a         | 1,04 | No  |
| ENSMUSG00000053914 | -4,65E-01 | -2,185700439 | 3,98E-01  | 5,28E-01 | 8,04E-01 | Kdm4d         | 0,72 | No  |
| ENSMUSG00000053916 | 1,24E-01  | 1,384026546  | 4,71E-01  | 4,93E-01 | 7,78E-01 | Nanp          | 1,09 | No  |
| ENSMUSG00000053925 | 4,73E-01  | 0,87683209   | 4,81E+00  | 2,83E-02 | 1,90E-01 | Gm9929        | 1,39 | No  |
| ENSMUSG00000053929 | -6,49E-02 | 6,122065297  | 1,01E+00  | 3,14E-01 | 6,14E-01 | Cyhr1         | 0,96 | No  |
| ENSMUSG00000053931 | -5,84E-01 | 0,766062717  | 7,22E+00  | 7,22E-03 | 7,35E-02 | Cnn3          | 0,67 | No  |
| ENSMUSG00000053950 | 2,26E-01  | 4,12039096   | 7,14E+00  | 7,54E-03 | 7,58E-02 | Adnp2         | 1,17 | No  |
| ENSMUSG00000053957 | -7,27E-01 | -2,1856877   | 9,00E-01  | 3,43E-01 | 6,43E-01 | Gm12474       | 0,60 | No  |
| ENSMUSG00000053961 | -8,22E-01 | -2,831994842 | 3,71E-01  | 5,43E-01 | 8,12E-01 | Ang5          | 0,57 | No  |
| ENSMUSG00000053963 | -3,57E-01 | 3,411423279  | 1,25E+01  | 4,10E-04 | 7,76E-03 | Stum          | 0,78 | Yes |
| ENSMUSG00000053964 | 8,73E-02  | 1,218048246  | 1,99E-01  | 6,56E-01 | 8,80E-01 | Lgals4        | 1,06 | No  |
| ENSMUSG00000053965 | -4,53E-01 | -0,011175681 | 2,58E+00  | 1,08E-01 | 4,03E-01 | Pde5a         | 0,73 | No  |
| ENSMUSG00000053977 | 4,83E-02  | 0,721357789  | 4,88E-02  | 8,25E-01 | 9,74E-01 | Cd8a          | 1,03 | No  |
| ENSMUSG00000053980 | 3,14E-02  | -3,107617333 | -7,69E-10 | 1,00E+00 | 1,00E+00 | Gm9930        | 1,02 | No  |
| ENSMUSG00000053985 | 2,13E-01  | 0,693878225  | 9,87E-01  | 3,20E-01 | 6,21E-01 | Zfp14         | 1,16 | No  |
| ENSMUSG00000054000 | 1,41E-01  | 4,410224356  | 2,97E+00  | 8,47E-02 | 3,73E-01 | Tusc1         | 1,10 | No  |
| ENSMUSG00000054005 | -1,89E+00 | -3,1076441   | 1,42E+00  | 2,33E-01 | 5,50E-01 | Mill1         | 0,27 | No  |
| ENSMUSG00000054006 | 3,47E-01  | 1,699378656  | 4,33E+00  | 3,75E-02 | 2,30E-01 | D630008O14Rik | 1,27 | No  |
| ENSMUSG00000054008 | 1,35E-01  | 6,266952703  | 4,47E+00  | 3,46E-02 | 2,19E-01 | Ndst1         | 1,10 | No  |
| ENSMUSG00000054013 | -3,18E+00 | -2,832017009 | 4,25E+00  | 3,93E-02 | 2,35E-01 | Tmem179       | 0,11 | No  |
| ENSMUSG00000054021 | -2,40E-01 | 2,31702928   | 3,24E+00  | 7,19E-02 | 3,40E-01 | Sirt5         | 0,85 | No  |
| ENSMUSG00000054027 | 1,94E-01  | 4,758080187  | 6,37E+00  | 1,16E-02 | 1,04E-01 | Nt5dc3        | 1,14 | No  |
| ENSMUSG00000054046 | -1,87E+00 | -3,107637761 | 1,39E+00  | 2,38E-01 | 5,50E-01 | Klk13         | 0,27 | No  |
| ENSMUSG00000054051 | 1,69E-01  | 5,936425667  | 6,50E+00  | 1,08E-02 | 9,89E-02 | Ercc6         | 1,12 | No  |

|                    |           |              |           |          |          |               |      |     |
|--------------------|-----------|--------------|-----------|----------|----------|---------------|------|-----|
| ENSMUSG00000054057 | 6,89E-02  | 1,083543861  | 1,19E-01  | 7,30E-01 | 9,21E-01 | A930004D18Rik | 1,05 | No  |
| ENSMUSG00000054061 | -1,91E-01 | -1,051606375 | 1,85E-01  | 6,67E-01 | 8,86E-01 | Gm9934        | 0,88 | No  |
| ENSMUSG00000054065 | -6,84E-01 | 3,279171259  | 4,28E+01  | 6,06E-11 | 5,94E-09 | Pkp3          | 0,62 | Yes |
| ENSMUSG00000054069 | -5,10E-01 | -1,92927015  | 6,31E-01  | 4,27E-01 | 7,21E-01 | 6030452D12Rik | 0,70 | No  |
| ENSMUSG00000054072 | -3,93E-01 | -0,997921705 | 8,06E-01  | 3,69E-01 | 6,71E-01 | ligp1         | 0,76 | No  |
| ENSMUSG00000054074 | -1,09E-01 | -0,378275065 | 1,02E-01  | 7,50E-01 | 9,31E-01 | Skida1        | 0,93 | No  |
| ENSMUSG00000054079 | -1,69E-02 | 5,32459854   | 5,68E-02  | 8,12E-01 | 9,67E-01 | Utp18         | 0,99 | No  |
| ENSMUSG00000054083 | 1,86E-01  | 2,991735548  | 2,74E+00  | 9,80E-02 | 3,91E-01 | Capn12        | 1,14 | No  |
| ENSMUSG00000054091 | -8,80E-03 | 5,181503871  | 1,47E-02  | 9,04E-01 | 1,00E+00 | 1810037I17Rik | 0,99 | No  |
| ENSMUSG00000054099 | 2,69E-01  | 3,302431512  | 6,62E+00  | 1,01E-02 | 9,38E-02 | Slc25a40      | 1,21 | No  |
| ENSMUSG00000054115 | 5,28E-01  | 3,247417553  | 2,56E+01  | 4,29E-07 | 2,08E-05 | Skp2          | 1,44 | Yes |
| ENSMUSG00000054116 | -2,27E-01 | -1,535365654 | 1,65E-01  | 6,85E-01 | 8,97E-01 | E130116L18Rik | 0,85 | No  |
| ENSMUSG00000054128 | -3,87E-02 | -2,655121351 | 1,34E-03  | 9,71E-01 | 1,00E+00 | H2-T3         | 0,97 | No  |
| ENSMUSG00000054134 | 1,58E+00  | -2,711780351 | 1,71E+00  | 1,91E-01 | 5,50E-01 | Umodl1        | 2,99 | No  |
| ENSMUSG00000054135 | 6,20E-01  | -1,627645049 | 1,35E+00  | 2,45E-01 | 5,50E-01 | A430110L20Rik | 1,54 | No  |
| ENSMUSG00000054136 | 3,14E-02  | -3,107617333 | -7,69E-10 | 1,00E+00 | 1,00E+00 | Adm2          | 1,02 | No  |
| ENSMUSG00000054150 | 2,90E-01  | 4,793268762  | 1,38E+01  | 1,99E-04 | 4,33E-03 | Syne3         | 1,22 | Yes |
| ENSMUSG00000054160 | 2,57E-01  | -0,136571456 | 7,97E-01  | 3,72E-01 | 6,73E-01 | Nkx2-4        | 1,19 | No  |
| ENSMUSG00000054161 | -7,43E-02 | -1,770429767 | 1,15E-02  | 9,14E-01 | 1,00E+00 | Fam83e        | 0,95 | No  |
| ENSMUSG00000054169 | -1,80E+00 | -0,497169084 | 2,03E+01  | 6,65E-06 | 2,33E-04 | Ceacam10      | 0,29 | Yes |
| ENSMUSG00000054178 | 2,13E-01  | 2,678534769  | 2,95E+00  | 8,61E-02 | 3,78E-01 | Gm9938        | 1,16 | No  |
| ENSMUSG00000054181 | 2,87E-02  | -0,074860406 | 9,82E-03  | 9,21E-01 | 1,00E+00 | A930012O16Rik | 1,02 | No  |
| ENSMUSG00000054191 | 1,39E-01  | -1,697430485 | 5,82E-02  | 8,09E-01 | 9,65E-01 | Klf1          | 1,10 | No  |
| ENSMUSG00000054196 | 6,85E-01  | -2,896150766 | 2,55E-01  | 6,14E-01 | 8,53E-01 | Cthrc1        | 1,61 | No  |
| ENSMUSG00000054199 | 5,70E-02  | 5,951249215  | 7,55E-01  | 3,85E-01 | 6,86E-01 | Gon4l         | 1,04 | No  |
| ENSMUSG00000054200 | 7,73E-02  | 4,593791716  | 9,64E-01  | 3,26E-01 | 6,27E-01 | Ffar4         | 1,06 | No  |
| ENSMUSG00000054203 | 2,42E-01  | 3,038753548  | 4,71E+00  | 3,00E-02 | 1,98E-01 | Ifi205        | 1,18 | No  |
| ENSMUSG00000054204 | -7,53E-02 | -2,401408256 | 6,50E-03  | 9,36E-01 | 1,00E+00 | Alkal2        | 0,95 | No  |
| ENSMUSG00000054206 | -1,54E-01 | -0,44883928  | 2,03E-01  | 6,52E-01 | 8,77E-01 | Gzmm          | 0,90 | No  |
| ENSMUSG00000054226 | 1,73E-01  | 4,303929209  | 4,32E+00  | 3,77E-02 | 2,31E-01 | Tprkb         | 1,13 | No  |
| ENSMUSG00000054237 | -1,97E-01 | 2,265133106  | 2,04E+00  | 1,53E-01 | 4,96E-01 | Fra10ac1      | 0,87 | No  |
| ENSMUSG00000054247 | 4,34E-01  | 1,825303021  | 7,20E+00  | 7,28E-03 | 7,39E-02 | Gm9939        | 1,35 | No  |



|                    |           |              |           |          |          |               |      |     |
|--------------------|-----------|--------------|-----------|----------|----------|---------------|------|-----|
| ENSMUSG00000054252 | -7,02E-01 | 0,225785425  | 7,49E+00  | 6,19E-03 | 6,57E-02 | Fgfr3         | 0,61 | No  |
| ENSMUSG00000054256 | 9,01E-03  | -3,107646452 | -5,16E-10 | 1,00E+00 | 1,00E+00 | Msi1          | 1,01 | No  |
| ENSMUSG00000054258 | -3,56E+00 | -2,896109226 | 5,70E+00  | 1,70E-02 | 1,36E-01 | Gm5082        | 0,08 | No  |
| ENSMUSG00000054263 | 4,34E-02  | 4,771625263  | 3,20E-01  | 5,72E-01 | 8,32E-01 | Lifr          | 1,03 | No  |
| ENSMUSG00000054277 | 5,77E-02  | 5,089464727  | 6,23E-01  | 4,30E-01 | 7,23E-01 | Arfgap3       | 1,04 | No  |
| ENSMUSG00000054280 | 1,85E-01  | 5,962178315  | 8,02E+00  | 4,63E-03 | 5,27E-02 | Prrc14l       | 1,14 | No  |
| ENSMUSG00000054302 | -2,18E-01 | 4,592787261  | 7,61E+00  | 5,81E-03 | 6,26E-02 | Eapp          | 0,86 | No  |
| ENSMUSG00000054304 | 4,54E-01  | -0,574226933 | 1,55E+00  | 2,14E-01 | 5,50E-01 | D130007C19Rik | 1,37 | No  |
| ENSMUSG00000054309 | 5,83E-02  | 5,803166846  | 7,61E-01  | 3,83E-01 | 6,84E-01 | Cpsf3         | 1,04 | No  |
| ENSMUSG00000054312 | -1,03E-01 | 4,936751368  | 1,89E+00  | 1,70E-01 | 5,25E-01 | Mrps21        | 0,93 | No  |
| ENSMUSG00000054320 | 7,31E-01  | -1,800998207 | 1,44E+00  | 2,30E-01 | 5,50E-01 | Lrrc36        | 1,66 | No  |
| ENSMUSG00000054321 | 1,59E-01  | 3,606362383  | 2,63E+00  | 1,05E-01 | 3,97E-01 | Taf4b         | 1,12 | No  |
| ENSMUSG00000054342 | 2,71E-01  | 7,384090227  | 2,06E+01  | 5,74E-06 | 2,05E-04 | Kcnn4         | 1,21 | Yes |
| ENSMUSG00000054360 | 7,07E-01  | -2,963242697 | 2,70E-01  | 6,03E-01 | 8,48E-01 | Bsx           | 1,63 | No  |
| ENSMUSG00000054362 | -2,70E+00 | -3,033614577 | 2,89E+00  | 8,93E-02 | 3,79E-01 | Lexm          | 0,15 | No  |
| ENSMUSG00000054364 | 1,10E-01  | 6,019658773  | 2,81E+00  | 9,35E-02 | 3,83E-01 | Rhob          | 1,08 | No  |
| ENSMUSG00000054381 | -7,68E-02 | 2,598726463  | 3,77E-01  | 5,39E-01 | 8,09E-01 | Zfp747        | 0,95 | No  |
| ENSMUSG00000054383 | -6,33E-01 | -0,210804008 | 4,10E+00  | 4,30E-02 | 2,46E-01 | Pnma1         | 0,64 | No  |
| ENSMUSG00000054385 | -1,94E-01 | 3,098838033  | 3,09E+00  | 7,88E-02 | 3,59E-01 | Ceacam2       | 0,87 | No  |
| ENSMUSG00000054387 | -2,90E-01 | 7,623818172  | 2,43E+01  | 8,38E-07 | 3,81E-05 | Mdm4          | 0,82 | Yes |
| ENSMUSG00000054400 | 6,52E-02  | 4,281835315  | 6,18E-01  | 4,32E-01 | 7,25E-01 | Cklf          | 1,05 | No  |
| ENSMUSG00000054404 | -7,48E-02 | 6,223552706  | 1,37E+00  | 2,41E-01 | 5,50E-01 | Slfn5         | 0,95 | No  |
| ENSMUSG00000054405 | -8,71E-02 | 5,753026677  | 1,69E+00  | 1,94E-01 | 5,50E-01 | Dnajc8        | 0,94 | No  |
| ENSMUSG00000054408 | 1,54E-01  | 7,515818526  | 6,80E+00  | 9,10E-03 | 8,70E-02 | Spcs3         | 1,11 | No  |
| ENSMUSG00000054409 | 6,25E-01  | -2,497574475 | 4,36E-01  | 5,09E-01 | 7,92E-01 | Tmem74        | 1,54 | No  |
| ENSMUSG00000054412 | 2,10E-01  | 1,797585509  | 1,63E+00  | 2,02E-01 | 5,50E-01 | Gm4793        | 1,16 | No  |
| ENSMUSG00000054414 | 1,33E-01  | 6,593902982  | 4,55E+00  | 3,28E-02 | 2,12E-01 | Slc30a7       | 1,10 | No  |
| ENSMUSG00000054418 | -3,59E-01 | -0,740658482 | 8,98E-01  | 3,43E-01 | 6,44E-01 | 2900041M22Rik | 0,78 | No  |
| ENSMUSG00000054422 | 6,97E-01  | -0,574341647 | 3,65E+00  | 5,60E-02 | 2,90E-01 | Fabp1         | 1,62 | No  |
| ENSMUSG00000054423 | -3,77E-01 | -0,770580061 | 9,56E-01  | 3,28E-01 | 6,29E-01 | Cadps         | 0,77 | No  |
| ENSMUSG00000054426 | 2,37E-01  | 0,128059375  | 7,17E-01  | 3,97E-01 | 6,97E-01 | A930005H10Rik | 1,18 | No  |
| ENSMUSG00000054428 | -2,38E-01 | 6,4291056    | 1,43E+01  | 1,58E-04 | 3,55E-03 | Atpif1        | 0,85 | Yes |

|                    |           |              |          |          |          |               |      |     |
|--------------------|-----------|--------------|----------|----------|----------|---------------|------|-----|
| ENSMUSG00000054434 | -2,14E-01 | 4,675838207  | 7,68E+00 | 5,57E-03 | 6,05E-02 | Tmem120b      | 0,86 | No  |
| ENSMUSG00000054435 | 3,85E-01  | -2,070171745 | 2,36E-01 | 6,27E-01 | 8,60E-01 | Gimap4        | 1,31 | No  |
| ENSMUSG00000054446 | -1,87E+00 | -3,107637761 | 1,39E+00 | 2,38E-01 | 5,50E-01 | Cpa1          | 0,27 | No  |
| ENSMUSG00000054450 | 1,20E+00  | -3,146123991 | 6,74E-01 | 4,12E-01 | 7,07E-01 | Gm9945        | 2,30 | No  |
| ENSMUSG00000054452 | -8,03E-02 | 7,822341916  | 1,88E+00 | 1,70E-01 | 5,26E-01 | Aes           | 0,95 | No  |
| ENSMUSG00000054455 | -2,82E-02 | 6,745725372  | 2,10E-01 | 6,47E-01 | 8,74E-01 | Vapb          | 0,98 | No  |
| ENSMUSG00000054459 | 6,16E-01  | -2,548223342 | 4,23E-01 | 5,15E-01 | 7,97E-01 | Vsnl1         | 1,53 | No  |
| ENSMUSG00000054469 | 9,83E-02  | 5,241256038  | 1,88E+00 | 1,70E-01 | 5,26E-01 | Lclat1        | 1,07 | No  |
| ENSMUSG00000054474 | -6,61E-01 | 0,748192861  | 8,88E+00 | 2,88E-03 | 3,71E-02 | Thnsl2        | 0,63 | Yes |
| ENSMUSG00000054477 | -4,70E-01 | -2,998027202 | 1,10E-01 | 7,41E-01 | 9,27E-01 | Kcnn2         | 0,72 | No  |
| ENSMUSG00000054484 | 3,30E-03  | 3,901279219  | 1,32E-03 | 9,71E-01 | 1,00E+00 | Tmem62        | 1,00 | No  |
| ENSMUSG00000054488 | -1,87E+00 | -3,107637761 | 1,39E+00 | 2,38E-01 | 5,50E-01 | Gm9946        | 0,27 | No  |
| ENSMUSG00000054493 | 1,85E+00  | -3,107657832 | 1,35E+00 | 2,46E-01 | 5,50E-01 | Gm9947        | 3,61 | No  |
| ENSMUSG00000054499 | -2,49E-01 | 4,743219631  | 1,04E+01 | 1,25E-03 | 1,94E-02 | Dedd2         | 0,84 | Yes |
| ENSMUSG00000054509 | -1,26E-01 | 6,472921818  | 4,01E+00 | 4,51E-02 | 2,53E-01 | Parp4         | 0,92 | No  |
| ENSMUSG00000054510 | -5,81E-01 | 0,721614673  | 6,79E+00 | 9,19E-03 | 8,77E-02 | Gm14461       | 0,67 | No  |
| ENSMUSG00000054514 | -8,55E-01 | -2,070195968 | 1,31E+00 | 2,52E-01 | 5,50E-01 | Atad3aos      | 0,55 | No  |
| ENSMUSG00000054517 | 2,36E-01  | 3,257570457  | 5,12E+00 | 2,37E-02 | 1,69E-01 | Trim65        | 1,18 | No  |
| ENSMUSG00000054519 | -3,86E-02 | 1,755800298  | 6,00E-02 | 8,06E-01 | 9,64E-01 | Zfp867        | 0,97 | No  |
| ENSMUSG00000054520 | 3,10E-01  | 6,187599417  | 2,33E+01 | 1,39E-06 | 5,95E-05 | Sh3bp2        | 1,24 | Yes |
| ENSMUSG00000054545 | -2,71E-01 | 3,266932779  | 6,63E+00 | 1,00E-02 | 9,35E-02 | Ugt1a6a       | 0,83 | No  |
| ENSMUSG00000054555 | 5,42E-01  | 1,652589388  | 9,74E+00 | 1,80E-03 | 2,58E-02 | Adam12        | 1,46 | Yes |
| ENSMUSG00000054556 | -2,21E-01 | 3,521936129  | 5,09E+00 | 2,41E-02 | 1,70E-01 | Gm4876        | 0,86 | No  |
| ENSMUSG00000054580 | -1,74E+00 | -2,033525454 | 5,34E+00 | 2,09E-02 | 1,55E-01 | Pla2r1        | 0,30 | No  |
| ENSMUSG00000054582 | 1,61E-01  | 0,258888277  | 2,93E-01 | 5,88E-01 | 8,40E-01 | Pabpc1l       | 1,12 | No  |
| ENSMUSG00000054589 | 2,58E-01  | 0,952587874  | 1,36E+00 | 2,44E-01 | 5,50E-01 | Gm9949        | 1,20 | No  |
| ENSMUSG00000054594 | -1,25E+00 | -1,800847817 | 3,70E+00 | 5,45E-02 | 2,86E-01 | Oscar         | 0,42 | No  |
| ENSMUSG00000054598 | 1,09E-01  | 1,114226482  | 2,90E-01 | 5,90E-01 | 8,41E-01 | 9130230L23Rik | 1,08 | No  |
| ENSMUSG00000054604 | -2,32E-03 | 7,151443671  | 1,49E-03 | 9,69E-01 | 1,00E+00 | Cggbp1        | 1,00 | No  |
| ENSMUSG00000054611 | 5,47E-02  | 6,984336457  | 8,14E-01 | 3,67E-01 | 6,68E-01 | Kdm2a         | 1,04 | No  |
| ENSMUSG00000054612 | 2,59E-03  | 2,664695283  | 4,27E-04 | 9,84E-01 | 1,00E+00 | Mgmt          | 1,00 | No  |
| ENSMUSG00000054618 | 8,02E-01  | -2,711748167 | 5,59E-01 | 4,55E-01 | 7,44E-01 | Gm9951        | 1,74 | No  |

|                    |           |              |           |          |          |               |      |     |
|--------------------|-----------|--------------|-----------|----------|----------|---------------|------|-----|
| ENSMUSG00000054619 | 2,53E-01  | 5,023013165  | 1,17E+01  | 6,36E-04 | 1,12E-02 | Mettl7a1      | 1,19 | Yes |
| ENSMUSG00000054622 | 2,26E-01  | -2,456919762 | 5,15E-02  | 8,21E-01 | 9,72E-01 | D730045B01Rik | 1,17 | No  |
| ENSMUSG00000054640 | -1,18E-01 | 5,312096297  | 2,78E+00  | 9,54E-02 | 3,86E-01 | Slc8a1        | 0,92 | No  |
| ENSMUSG00000054641 | -4,50E-02 | -2,711766047 | 1,79E-03  | 9,66E-01 | 1,00E+00 | Mmrn1         | 0,97 | No  |
| ENSMUSG00000054648 | -1,11E-01 | 4,161595962  | 1,66E+00  | 1,98E-01 | 5,50E-01 | Zfp869        | 0,93 | No  |
| ENSMUSG00000054659 | -3,77E-01 | -2,448548803 | 1,79E-01  | 6,72E-01 | 8,89E-01 | Pm20d2        | 0,77 | No  |
| ENSMUSG00000054662 | -1,92E+00 | -3,033623267 | 1,46E+00  | 2,27E-01 | 5,50E-01 | Ano9          | 0,26 | No  |
| ENSMUSG00000054666 | -1,87E+00 | -3,107637761 | 1,39E+00  | 2,38E-01 | 5,50E-01 | Olfr63        | 0,27 | No  |
| ENSMUSG00000054672 | 9,01E-03  | -3,107646452 | -5,16E-10 | 1,00E+00 | 1,00E+00 | 5830411N06Rik | 1,01 | No  |
| ENSMUSG00000054675 | -1,51E-02 | 1,340917136  | 6,35E-03  | 9,36E-01 | 1,00E+00 | Tmem119       | 0,99 | No  |
| ENSMUSG00000054676 | -8,05E-02 | 5,784427032  | 1,47E+00  | 2,26E-01 | 5,50E-01 | 1600014C10Rik | 0,95 | No  |
| ENSMUSG00000054679 | -7,42E-01 | -2,497543813 | 6,17E-01  | 4,32E-01 | 7,26E-01 | Srsf12        | 0,60 | No  |
| ENSMUSG00000054690 | 8,60E-01  | -2,600645158 | 6,44E-01  | 4,22E-01 | 7,18E-01 | Emcn          | 1,82 | No  |
| ENSMUSG00000054693 | -1,09E-02 | 7,493715151  | 3,41E-02  | 8,54E-01 | 9,92E-01 | Adam10        | 0,99 | No  |
| ENSMUSG00000054702 | 1,24E-01  | 4,397074542  | 2,33E+00  | 1,27E-01 | 4,47E-01 | Ap1s3         | 1,09 | No  |
| ENSMUSG00000054708 | -7,19E-02 | 3,621751783  | 5,50E-01  | 4,58E-01 | 7,47E-01 | Ankrd24       | 0,95 | No  |
| ENSMUSG00000054715 | 6,29E-01  | 2,687031934  | 2,76E+01  | 1,51E-07 | 8,07E-06 | Zscan22       | 1,55 | Yes |
| ENSMUSG00000054716 | 6,78E-02  | 3,642850332  | 5,10E-01  | 4,75E-01 | 7,63E-01 | Zfp771        | 1,05 | No  |
| ENSMUSG00000054717 | 1,15E-01  | 5,611472709  | 2,83E+00  | 9,25E-02 | 3,83E-01 | Hmgb2         | 1,08 | No  |
| ENSMUSG00000054720 | -3,07E-02 | 6,952674604  | 2,54E-01  | 6,15E-01 | 8,53E-01 | Lrrc8c        | 0,98 | No  |
| ENSMUSG00000054723 | -9,13E-02 | 2,864563671  | 6,15E-01  | 4,33E-01 | 7,26E-01 | Vmac          | 0,94 | No  |
| ENSMUSG00000054728 | 2,10E-01  | 0,412472747  | 6,46E-01  | 4,22E-01 | 7,17E-01 | Phactr1       | 1,16 | No  |
| ENSMUSG00000054733 | 1,37E-01  | 3,521535383  | 1,85E+00  | 1,73E-01 | 5,30E-01 | Msra          | 1,10 | No  |
| ENSMUSG00000054745 | -1,89E+00 | -3,1076441   | 1,42E+00  | 2,33E-01 | 5,50E-01 | Gm9955        | 0,27 | No  |
| ENSMUSG00000054752 | -3,90E-01 | 3,842550177  | 1,84E+01  | 1,81E-05 | 5,66E-04 | Fsd1l         | 0,76 | Yes |
| ENSMUSG00000054753 | 1,81E+00  | -3,10765737  | 1,28E+00  | 2,58E-01 | 5,50E-01 | AU018091      | 3,49 | No  |
| ENSMUSG00000054763 | 1,87E+00  | -3,033632735 | 1,36E+00  | 2,43E-01 | 5,50E-01 | Defb42        | 3,66 | No  |
| ENSMUSG00000054766 | 4,35E-02  | 6,84531967   | 5,02E-01  | 4,79E-01 | 7,66E-01 | Set           | 1,03 | No  |
| ENSMUSG00000054770 | -2,18E-03 | 5,105525016  | 9,03E-04  | 9,76E-01 | 1,00E+00 | Kctd18        | 1,00 | No  |
| ENSMUSG00000054779 | -2,68E+00 | -3,033645766 | 2,84E+00  | 9,17E-02 | 3,82E-01 | Fgf2os        | 0,16 | No  |
| ENSMUSG00000054792 | 1,10E-01  | 5,167313245  | 2,34E+00  | 1,26E-01 | 4,45E-01 | Klhl18        | 1,08 | No  |
| ENSMUSG00000054793 | -2,48E-02 | -0,267923486 | 4,66E-03  | 9,46E-01 | 1,00E+00 | Cadm4         | 0,98 | No  |

|                    |           |              |          |          |          |               |      |     |
|--------------------|-----------|--------------|----------|----------|----------|---------------|------|-----|
| ENSMUSG00000054808 | 4,52E-02  | 7,963759072  | 6,01E-01 | 4,38E-01 | 7,31E-01 | Actn4         | 1,03 | No  |
| ENSMUSG00000054814 | 2,10E-01  | 4,490289685  | 6,81E+00 | 9,07E-03 | 8,69E-02 | Usp46         | 1,16 | No  |
| ENSMUSG00000054822 | -9,51E-01 | -1,847767517 | 1,97E+00 | 1,61E-01 | 5,09E-01 | 1700041G16Rik | 0,52 | No  |
| ENSMUSG00000054823 | 7,38E-03  | 7,049209296  | 1,49E-02 | 9,03E-01 | 1,00E+00 | Nsd3          | 1,01 | No  |
| ENSMUSG00000054836 | 1,02E-01  | 2,584477695  | 6,66E-01 | 4,14E-01 | 7,10E-01 | Elp6          | 1,07 | No  |
| ENSMUSG00000054843 | 1,40E-01  | 6,470573539  | 4,94E+00 | 2,63E-02 | 1,81E-01 | Atrnl1        | 1,10 | No  |
| ENSMUSG00000054855 | -1,17E-01 | 0,776300863  | 2,89E-01 | 5,91E-01 | 8,41E-01 | Rnd1          | 0,92 | No  |
| ENSMUSG00000054863 | -1,94E+00 | -3,107619243 | 1,50E+00 | 2,21E-01 | 5,50E-01 | Fam19a5       | 0,26 | No  |
| ENSMUSG00000054871 | -2,59E-01 | 0,726584466  | 1,30E+00 | 2,54E-01 | 5,50E-01 | Tmem158       | 0,84 | No  |
| ENSMUSG00000054874 | 5,07E-02  | 6,804363104  | 6,83E-01 | 4,09E-01 | 7,05E-01 | Pcnx3         | 1,04 | No  |
| ENSMUSG00000054889 | -6,96E-01 | -2,54820941  | 5,41E-01 | 4,62E-01 | 7,51E-01 | Dsp           | 0,62 | No  |
| ENSMUSG00000054890 | 1,87E+00  | -3,107639691 | 1,38E+00 | 2,40E-01 | 5,50E-01 | Olfr1535      | 3,67 | No  |
| ENSMUSG00000054892 | -5,67E-01 | -1,711791452 | 8,89E-01 | 3,46E-01 | 6,47E-01 | Txk           | 0,67 | No  |
| ENSMUSG00000054893 | 2,21E-01  | 0,683178243  | 9,27E-01 | 3,36E-01 | 6,37E-01 | Zfp667        | 1,17 | No  |
| ENSMUSG00000054894 | -1,74E-02 | 1,936931079  | 1,35E-02 | 9,07E-01 | 1,00E+00 | Atp5s         | 0,99 | No  |
| ENSMUSG00000054901 | 3,78E-01  | -2,088805481 | 2,87E-01 | 5,92E-01 | 8,42E-01 | Arhgef33      | 1,30 | No  |
| ENSMUSG00000054905 | -6,27E-01 | -1,831976508 | 9,93E-01 | 3,19E-01 | 6,19E-01 | Stfa3         | 0,65 | No  |
| ENSMUSG00000054910 | 1,23E+00  | -2,424897366 | 1,50E+00 | 2,21E-01 | 5,50E-01 | 4931415C17Rik | 2,35 | No  |
| ENSMUSG00000054920 | -1,98E-01 | 6,712137965  | 1,03E+01 | 1,30E-03 | 2,01E-02 | Klhl5         | 0,87 | Yes |
| ENSMUSG00000054931 | -3,64E-01 | -0,267980734 | 1,30E+00 | 2,54E-01 | 5,50E-01 | Zkscan4       | 0,78 | No  |
| ENSMUSG00000054932 | -1,44E-02 | 0,508539065  | 3,45E-03 | 9,53E-01 | 1,00E+00 | Afp           | 0,99 | No  |
| ENSMUSG00000054934 | -1,89E+00 | -2,740792706 | 2,60E+00 | 1,07E-01 | 4,00E-01 | Kcnmb4        | 0,27 | No  |
| ENSMUSG00000054939 | 1,51E-01  | 0,103737718  | 3,07E-01 | 5,79E-01 | 8,36E-01 | Zfp174        | 1,11 | No  |
| ENSMUSG00000054942 | -1,38E-01 | 3,658620323  | 2,11E+00 | 1,46E-01 | 4,85E-01 | Miga1         | 0,91 | No  |
| ENSMUSG00000054944 | 1,81E+00  | -3,10765737  | 1,28E+00 | 2,58E-01 | 5,50E-01 | 5330416C01Rik | 3,49 | No  |
| ENSMUSG00000054945 | 1,52E-01  | -1,548261553 | 7,01E-02 | 7,91E-01 | 9,55E-01 | Gm9958        | 1,11 | No  |
| ENSMUSG00000054951 | -7,04E-01 | 1,792541317  | 2,04E+01 | 6,19E-06 | 2,18E-04 | 9130008F23Rik | 0,61 | Yes |
| ENSMUSG00000054957 | -8,36E-01 | -2,522659561 | 6,98E-01 | 4,03E-01 | 7,01E-01 | Gm9959        | 0,56 | No  |
| ENSMUSG00000054958 | -8,45E-01 | -2,963265612 | 3,92E-01 | 5,31E-01 | 8,05E-01 | Nt5c1a        | 0,56 | No  |
| ENSMUSG00000054966 | -2,70E+00 | -2,96323619  | 2,89E+00 | 8,89E-02 | 3,79E-01 | Lmntd1        | 0,15 | No  |
| ENSMUSG00000054967 | 1,02E+00  | -0,60078341  | 7,02E+00 | 8,06E-03 | 7,95E-02 | Zfp647        | 2,03 | No  |
| ENSMUSG00000054976 | -7,21E-02 | -2,832016801 | 3,55E-03 | 9,52E-01 | 1,00E+00 | Nyap2         | 0,95 | No  |

|                    |           |              |          |          |          |               |      |     |
|--------------------|-----------|--------------|----------|----------|----------|---------------|------|-----|
| ENSMUSG00000054978 | 1,43E-01  | -1,47295379  | 6,63E-02 | 7,97E-01 | 9,58E-01 | Kbtbd13       | 1,10 | No  |
| ENSMUSG00000054999 | 2,83E-01  | 1,112212415  | 2,01E+00 | 1,56E-01 | 5,00E-01 | Naaladl1      | 1,22 | No  |
| ENSMUSG00000055003 | -2,37E-01 | -2,033603789 | 1,11E-01 | 7,39E-01 | 9,26E-01 | Lrtm2         | 0,85 | No  |
| ENSMUSG00000055010 | -1,94E+00 | -3,107619243 | 1,50E+00 | 2,21E-01 | 5,50E-01 | A830031A19Rik | 0,26 | No  |
| ENSMUSG00000055013 | -9,73E-02 | 4,435543189  | 1,43E+00 | 2,32E-01 | 5,50E-01 | Agap1         | 0,93 | No  |
| ENSMUSG00000055015 | -2,04E+00 | -2,600589396 | 3,14E+00 | 7,64E-02 | 3,52E-01 | Gm9961        | 0,24 | No  |
| ENSMUSG00000055024 | 1,32E-01  | 7,396599192  | 4,92E+00 | 2,65E-02 | 1,82E-01 | Ep300         | 1,10 | No  |
| ENSMUSG00000055027 | -6,12E-02 | 1,195521903  | 1,03E-01 | 7,48E-01 | 9,30E-01 | Smyd1         | 0,96 | No  |
| ENSMUSG00000055041 | 7,98E-02  | 4,007314892  | 8,01E-01 | 3,71E-01 | 6,72E-01 | Commd5        | 1,06 | No  |
| ENSMUSG00000055044 | 1,82E-01  | 3,356642791  | 2,95E+00 | 8,59E-02 | 3,77E-01 | Pdlim1        | 1,13 | No  |
| ENSMUSG00000055053 | 1,34E-01  | 5,441172051  | 3,70E+00 | 5,43E-02 | 2,85E-01 | Nfic          | 1,10 | No  |
| ENSMUSG00000055061 | -3,75E-03 | 3,741506731  | 1,60E-03 | 9,68E-01 | 1,00E+00 | 4931431C16Rik | 1,00 | No  |
| ENSMUSG00000055065 | -1,60E-01 | 8,709824038  | 7,87E+00 | 5,04E-03 | 5,62E-02 | Ddx17         | 0,89 | No  |
| ENSMUSG00000055067 | -2,12E-02 | 3,477100792  | 4,41E-02 | 8,34E-01 | 9,79E-01 | Smyd3         | 0,99 | No  |
| ENSMUSG00000055069 | 5,20E-01  | 0,910911459  | 6,61E+00 | 1,02E-02 | 9,44E-02 | Rab39         | 1,43 | No  |
| ENSMUSG00000055093 | -1,55E-01 | 7,74853236   | 7,02E+00 | 8,06E-03 | 7,95E-02 | Gm8430        | 0,90 | No  |
| ENSMUSG00000055102 | -1,26E+00 | 0,184144513  | 1,92E+01 | 1,18E-05 | 3,90E-04 | Zfp819        | 0,42 | Yes |
| ENSMUSG00000055108 | 1,81E+00  | -3,10765737  | 1,28E+00 | 2,58E-01 | 5,50E-01 | Phxr2         | 3,49 | No  |
| ENSMUSG00000055114 | 7,05E-01  | -2,355641725 | 7,22E-01 | 3,96E-01 | 6,96E-01 | Anxa13        | 1,63 | No  |
| ENSMUSG00000055116 | 1,41E-01  | 3,68455154   | 2,16E+00 | 1,42E-01 | 4,76E-01 | Arntl         | 1,10 | No  |
| ENSMUSG00000055128 | 2,53E-02  | 4,153137604  | 8,48E-02 | 7,71E-01 | 9,42E-01 | Cgrrf1        | 1,02 | No  |
| ENSMUSG00000055134 | -2,35E+00 | -2,997971374 | 2,16E+00 | 1,42E-01 | 4,76E-01 | 9130017K11Rik | 0,20 | No  |
| ENSMUSG00000055137 | 2,24E-02  | 0,499367043  | 8,61E-03 | 9,26E-01 | 1,00E+00 | Sugct         | 1,02 | No  |
| ENSMUSG00000055148 | -6,83E-02 | 3,893281608  | 5,71E-01 | 4,50E-01 | 7,40E-01 | Klf2          | 0,95 | No  |
| ENSMUSG00000055150 | 3,07E-01  | 0,128028966  | 1,30E+00 | 2,53E-01 | 5,50E-01 | Zfp78         | 1,24 | No  |
| ENSMUSG00000055159 | -1,89E+00 | -3,1076441   | 1,42E+00 | 2,33E-01 | 5,50E-01 | 4930583K01Rik | 0,27 | No  |
| ENSMUSG00000055172 | 1,58E-01  | 3,402744743  | 2,32E+00 | 1,28E-01 | 4,48E-01 | C1ra          | 1,12 | No  |
| ENSMUSG00000055177 | -1,06E-01 | -3,033634182 | 5,86E-03 | 9,39E-01 | 1,00E+00 | Cstl1         | 0,93 | No  |
| ENSMUSG00000055184 | 3,18E-01  | 1,715412086  | 3,86E+00 | 4,94E-02 | 2,68E-01 | Fam72a        | 1,25 | No  |
| ENSMUSG00000055193 | 4,06E-01  | 3,335637705  | 1,46E+01 | 1,32E-04 | 3,06E-03 | Klk15         | 1,33 | Yes |
| ENSMUSG00000055200 | -3,14E-02 | 3,363258801  | 9,32E-02 | 7,60E-01 | 9,37E-01 | Sertad3       | 0,98 | No  |
| ENSMUSG00000055202 | -1,04E+00 | -2,033623725 | 2,03E+00 | 1,54E-01 | 4,97E-01 | Zfp811        | 0,49 | No  |

|                    |           |              |           |          |          |               |      |     |
|--------------------|-----------|--------------|-----------|----------|----------|---------------|------|-----|
| ENSMUSG00000055204 | -1,53E-03 | 7,332092635  | 6,58E-04  | 9,80E-01 | 1,00E+00 | Ankrd17       | 1,00 | No  |
| ENSMUSG00000055210 | -2,91E-03 | -0,126913723 | 8,24E-05  | 9,93E-01 | 1,00E+00 | Foxd2         | 1,00 | No  |
| ENSMUSG00000055216 | 1,26E-01  | -0,607656869 | 1,15E-01  | 7,35E-01 | 9,24E-01 | 9430025C20Rik | 1,09 | No  |
| ENSMUSG00000055228 | -1,37E-02 | 2,731639126  | 1,35E-02  | 9,08E-01 | 1,00E+00 | Zfp935        | 0,99 | No  |
| ENSMUSG00000055235 | -1,42E-01 | 3,635862257  | 2,28E+00  | 1,31E-01 | 4,56E-01 | Wdr86         | 0,91 | No  |
| ENSMUSG00000055239 | -1,80E-01 | 6,292729262  | 8,03E+00  | 4,60E-03 | 5,25E-02 | Kcmf1         | 0,88 | No  |
| ENSMUSG00000055240 | 1,89E-01  | 3,937754213  | 4,48E+00  | 3,43E-02 | 2,18E-01 | Zfp101        | 1,14 | No  |
| ENSMUSG00000055254 | -3,24E+00 | -2,896104886 | 4,43E+00  | 3,53E-02 | 2,22E-01 | Ntrk2         | 0,11 | No  |
| ENSMUSG00000055271 | 2,29E-01  | -1,16585687  | 1,77E-01  | 6,74E-01 | 8,90E-01 | 9330161L09Rik | 1,17 | No  |
| ENSMUSG00000055296 | 7,70E-02  | 7,105168566  | 1,63E+00  | 2,02E-01 | 5,50E-01 | Tmem245       | 1,05 | No  |
| ENSMUSG00000055301 | -1,94E+00 | -3,107619243 | 1,50E+00  | 2,21E-01 | 5,50E-01 | Adh7          | 0,26 | No  |
| ENSMUSG00000055302 | -1,08E-01 | 7,646302575  | 3,35E+00  | 6,71E-02 | 3,26E-01 | Mrfap1        | 0,93 | No  |
| ENSMUSG00000055305 | -1,76E-01 | 0,554002935  | 5,85E-01  | 4,44E-01 | 7,36E-01 | Zfp93         | 0,89 | No  |
| ENSMUSG00000055313 | -2,48E-01 | -0,126632949 | 6,19E-01  | 4,31E-01 | 7,25E-01 | Pgbd1         | 0,84 | No  |
| ENSMUSG00000055319 | 1,03E-01  | 5,779377252  | 2,36E+00  | 1,25E-01 | 4,42E-01 | Sec23ip       | 1,07 | No  |
| ENSMUSG00000055320 | -2,10E-01 | 1,244224325  | 1,22E+00  | 2,70E-01 | 5,66E-01 | Tead1         | 0,86 | No  |
| ENSMUSG00000055322 | 3,45E-01  | 8,145270688  | 3,52E+01  | 2,96E-09 | 2,26E-07 | Tns1          | 1,27 | Yes |
| ENSMUSG00000055323 | 9,99E-02  | -0,424837994 | 8,96E-02  | 7,65E-01 | 9,39E-01 | Gm9967        | 1,07 | No  |
| ENSMUSG00000055333 | 1,91E+00  | -2,548260003 | 2,72E+00  | 9,94E-02 | 3,92E-01 | Fat2          | 3,75 | No  |
| ENSMUSG00000055334 | -1,13E-01 | 3,197192693  | 1,14E+00  | 2,86E-01 | 5,82E-01 | Snupn         | 0,92 | No  |
| ENSMUSG00000055341 | 4,12E-01  | -1,412912196 | 5,58E-01  | 4,55E-01 | 7,45E-01 | Zfp457        | 1,33 | No  |
| ENSMUSG00000055360 | 3,67E-01  | -2,268140299 | 2,15E-01  | 6,43E-01 | 8,72E-01 | Prl2c5        | 1,29 | No  |
| ENSMUSG00000055368 | 9,01E-03  | -3,107646452 | -5,16E-10 | 1,00E+00 | 1,00E+00 | Slc6a2        | 1,01 | No  |
| ENSMUSG00000055370 | 3,16E+00  | -2,831998699 | 4,06E+00  | 4,39E-02 | 2,50E-01 | Gm9968        | 8,91 | No  |
| ENSMUSG00000055371 | -9,20E-05 | 5,242272491  | 1,67E-06  | 9,99E-01 | 1,00E+00 | Stam2         | 1,00 | No  |
| ENSMUSG00000055401 | 2,06E-02  | 5,004766846  | 7,76E-02  | 7,81E-01 | 9,49E-01 | Fbxo6         | 1,01 | No  |
| ENSMUSG00000055403 | -1,87E+00 | -3,107637761 | 1,39E+00  | 2,38E-01 | 5,50E-01 | 4933427D06Rik | 0,27 | No  |
| ENSMUSG00000055407 | 1,25E-01  | 3,724697905  | 1,76E+00  | 1,85E-01 | 5,49E-01 | Map6          | 1,09 | No  |
| ENSMUSG00000055413 | -5,35E-01 | 4,217988352  | 4,04E+01  | 2,04E-10 | 1,84E-08 | H2-Q5         | 0,69 | Yes |
| ENSMUSG00000055415 | -2,66E+00 | -3,033639428 | 2,81E+00  | 9,35E-02 | 3,83E-01 | Atp10b        | 0,16 | No  |
| ENSMUSG00000055416 | -2,27E+00 | -2,448656627 | 4,19E+00  | 4,06E-02 | 2,39E-01 | Fam136b-ps    | 0,21 | No  |
| ENSMUSG00000055424 | -1,82E-01 | 0,221882968  | 4,65E-01  | 4,95E-01 | 7,81E-01 | Gm9970        | 0,88 | No  |

|                    |           |              |           |          |          |               |      |     |
|--------------------|-----------|--------------|-----------|----------|----------|---------------|------|-----|
| ENSMUSG00000055430 | -4,31E-01 | -2,185720649 | 3,87E-01  | 5,34E-01 | 8,07E-01 | Nap1l5        | 0,74 | No  |
| ENSMUSG00000055435 | -9,84E-02 | 3,27295178   | 8,52E-01  | 3,56E-01 | 6,57E-01 | Maf           | 0,93 | No  |
| ENSMUSG00000055436 | -4,38E-02 | 7,54836068   | 5,48E-01  | 4,59E-01 | 7,48E-01 | Srsf11        | 0,97 | No  |
| ENSMUSG00000055446 | 3,14E+00  | -2,896171661 | 4,02E+00  | 4,50E-02 | 2,53E-01 | A630091E08Rik | 8,80 | No  |
| ENSMUSG00000055447 | -3,46E-01 | 7,31690759   | 3,36E+01  | 6,90E-09 | 4,93E-07 | Cd47          | 0,79 | Yes |
| ENSMUSG00000055452 | -1,40E-02 | 4,1238935    | 2,61E-02  | 8,72E-01 | 1,00E+00 | Gm7353        | 0,99 | No  |
| ENSMUSG00000055471 | 2,60E+00  | -2,77060903  | 2,63E+00  | 1,05E-01 | 3,97E-01 | Alk           | 6,07 | No  |
| ENSMUSG00000055480 | 2,93E-01  | 1,62579708   | 3,22E+00  | 7,28E-02 | 3,42E-01 | Zfp458        | 1,23 | No  |
| ENSMUSG00000055485 | 1,93E-01  | 6,907176364  | 9,94E+00  | 1,62E-03 | 2,36E-02 | Soga1         | 1,14 | Yes |
| ENSMUSG00000055491 | 8,29E-02  | 6,043598417  | 1,61E+00  | 2,05E-01 | 5,50E-01 | Pprc1         | 1,06 | No  |
| ENSMUSG00000055493 | -3,70E-02 | 2,175622441  | 6,85E-02  | 7,94E-01 | 9,56E-01 | Epm2a         | 0,97 | No  |
| ENSMUSG00000055494 | -6,18E-02 | -1,015704741 | 1,43E-02  | 9,05E-01 | 1,00E+00 | Gm14168       | 0,96 | No  |
| ENSMUSG00000055497 | -2,80E-01 | -1,522722147 | 2,75E-01  | 6,00E-01 | 8,46E-01 | Gm9974        | 0,82 | No  |
| ENSMUSG00000055523 | -3,77E-01 | -1,548179395 | 4,79E-01  | 4,89E-01 | 7,76E-01 | Gucy2g        | 0,77 | No  |
| ENSMUSG00000055531 | 3,12E-02  | 6,377543843  | 2,42E-01  | 6,22E-01 | 8,58E-01 | Cpsf6         | 1,02 | No  |
| ENSMUSG00000055538 | 1,65E-01  | 3,928226656  | 3,22E+00  | 7,27E-02 | 3,42E-01 | Zcchc24       | 1,12 | No  |
| ENSMUSG00000055540 | 9,01E-03  | -3,107646452 | -5,16E-10 | 1,00E+00 | 1,00E+00 | Epha6         | 1,01 | No  |
| ENSMUSG00000055541 | 2,50E-01  | 5,311275554  | 1,22E+01  | 4,67E-04 | 8,68E-03 | Lair1         | 1,19 | Yes |
| ENSMUSG00000055546 | 7,24E-01  | -2,896104002 | 2,86E-01  | 5,93E-01 | 8,42E-01 | Timd4         | 1,65 | No  |
| ENSMUSG00000055553 | -1,18E-01 | 6,356482822  | 3,48E+00  | 6,21E-02 | 3,10E-01 | Kxd1          | 0,92 | No  |
| ENSMUSG00000055560 | 1,23E-01  | -1,300245488 | 5,68E-02  | 8,12E-01 | 9,67E-01 | Zfp459        | 1,09 | No  |
| ENSMUSG00000055561 | 1,85E+00  | -3,107657832 | 1,35E+00  | 2,46E-01 | 5,50E-01 | Spink5        | 3,61 | No  |
| ENSMUSG00000055567 | 1,84E+00  | -3,033649193 | 1,33E+00  | 2,49E-01 | 5,50E-01 | Unc80         | 3,58 | No  |
| ENSMUSG00000055602 | -6,90E-01 | -1,574234599 | 1,36E+00  | 2,43E-01 | 5,50E-01 | Tcp10b        | 0,62 | No  |
| ENSMUSG00000055609 | 1,87E+00  | -3,107639691 | 1,38E+00  | 2,40E-01 | 5,50E-01 | Hba-x         | 3,67 | No  |
| ENSMUSG00000055610 | -1,89E+00 | -3,1076441   | 1,42E+00  | 2,33E-01 | 5,50E-01 | Olf307        | 0,27 | No  |
| ENSMUSG00000055612 | 2,11E-02  | 2,524379633  | 2,77E-02  | 8,68E-01 | 1,00E+00 | Cdca7         | 1,01 | No  |
| ENSMUSG00000055629 | -8,14E-01 | -2,311180925 | 9,66E-01  | 3,26E-01 | 6,26E-01 | B4galnt4      | 0,57 | No  |
| ENSMUSG00000055632 | 4,68E-01  | 3,407108168  | 2,09E+01  | 4,93E-06 | 1,78E-04 | Hmcn2         | 1,38 | Yes |
| ENSMUSG00000055633 | -3,21E-01 | 0,09563633   | 1,27E+00  | 2,61E-01 | 5,54E-01 | Zfp580        | 0,80 | No  |
| ENSMUSG00000055639 | -3,19E-01 | 2,126378148  | 4,69E+00  | 3,03E-02 | 2,00E-01 | Dach1         | 0,80 | No  |
| ENSMUSG00000055652 | 3,65E-01  | 3,76489096   | 1,58E+01  | 7,12E-05 | 1,82E-03 | Klhl25        | 1,29 | Yes |

|                    |           |              |          |          |          |               |      |     |
|--------------------|-----------|--------------|----------|----------|----------|---------------|------|-----|
| ENSMUSG00000055660 | 1,11E-01  | 2,736554647  | 8,61E-01 | 3,53E-01 | 6,55E-01 | Mettl4        | 1,08 | No  |
| ENSMUSG00000055670 | 2,39E-03  | 7,461815117  | 1,62E-03 | 9,68E-01 | 1,00E+00 | Zzef1         | 1,00 | No  |
| ENSMUSG00000055675 | 3,60E-01  | 2,181630594  | 6,58E+00 | 1,03E-02 | 9,56E-02 | Kbtbd11       | 1,28 | No  |
| ENSMUSG00000055676 | -2,59E-01 | -0,037994491 | 7,73E-01 | 3,79E-01 | 6,80E-01 | Gm5069        | 0,84 | No  |
| ENSMUSG00000055681 | 2,34E-02  | 6,197941958  | 1,32E-01 | 7,16E-01 | 9,13E-01 | Cope          | 1,02 | No  |
| ENSMUSG00000055692 | 5,01E-02  | 1,798140672  | 9,65E-02 | 7,56E-01 | 9,35E-01 | Tmem191c      | 1,04 | No  |
| ENSMUSG00000055704 | -1,89E+00 | -3,1076441   | 1,42E+00 | 2,33E-01 | 5,50E-01 | Gm9978        | 0,27 | No  |
| ENSMUSG00000055707 | -2,80E-02 | 4,322509691  | 1,14E-01 | 7,36E-01 | 9,24E-01 | Klhl26        | 0,98 | No  |
| ENSMUSG00000055717 | -6,56E-01 | 0,768607845  | 8,78E+00 | 3,05E-03 | 3,87E-02 | Slain1        | 0,63 | Yes |
| ENSMUSG00000055720 | -2,58E-01 | 5,282932557  | 1,33E+01 | 2,63E-04 | 5,46E-03 | Ubl7          | 0,84 | Yes |
| ENSMUSG00000055723 | -1,86E-02 | 5,842082842  | 7,90E-02 | 7,79E-01 | 9,47E-01 | Rras2         | 0,99 | No  |
| ENSMUSG00000055725 | -2,56E-01 | 5,098913556  | 1,24E+01 | 4,21E-04 | 7,96E-03 | Paqr3         | 0,84 | Yes |
| ENSMUSG00000055730 | 1,87E+00  | -3,107639691 | 1,38E+00 | 2,40E-01 | 5,50E-01 | Ces2a         | 3,67 | No  |
| ENSMUSG00000055737 | -3,17E-01 | -1,35552305  | 2,81E-01 | 5,96E-01 | 8,44E-01 | Ghr           | 0,80 | No  |
| ENSMUSG00000055745 | 1,90E-01  | 1,872835796  | 1,55E+00 | 2,14E-01 | 5,50E-01 | Ldoc1l        | 1,14 | No  |
| ENSMUSG00000055748 | -7,88E-02 | -2,185701049 | 1,16E-02 | 9,14E-01 | 1,00E+00 | Gsdmc4        | 0,95 | No  |
| ENSMUSG00000055760 | -1,17E-01 | 2,166659434  | 6,60E-01 | 4,16E-01 | 7,12E-01 | Gemin6        | 0,92 | No  |
| ENSMUSG00000055761 | 1,85E+00  | -3,107657832 | 1,35E+00 | 2,46E-01 | 5,50E-01 | Nkain3        | 3,61 | No  |
| ENSMUSG00000055762 | 4,24E-02  | 5,555429622  | 3,82E-01 | 5,36E-01 | 8,08E-01 | Eef1d         | 1,03 | No  |
| ENSMUSG00000055763 | -1,13E-01 | 2,316808661  | 6,77E-01 | 4,11E-01 | 7,07E-01 | Rybp-ps       | 0,92 | No  |
| ENSMUSG00000055771 | -1,29E-01 | 3,868640384  | 1,98E+00 | 1,60E-01 | 5,07E-01 | Gm7936        | 0,91 | No  |
| ENSMUSG00000055782 | 7,23E-02  | 4,98994052   | 9,61E-01 | 3,27E-01 | 6,28E-01 | Abcd2         | 1,05 | No  |
| ENSMUSG00000055795 | -4,41E-02 | 3,485752104  | 1,97E-01 | 6,57E-01 | 8,80E-01 | Gm5160        | 0,97 | No  |
| ENSMUSG00000055799 | -1,26E-01 | -0,150741744 | 1,81E-01 | 6,71E-01 | 8,88E-01 | Tcf7l1        | 0,92 | No  |
| ENSMUSG00000055805 | -9,83E-02 | 7,928467612  | 2,84E+00 | 9,17E-02 | 3,82E-01 | Fmnl1         | 0,93 | No  |
| ENSMUSG00000055809 | -3,10E-01 | 4,492783228  | 1,53E+01 | 9,24E-05 | 2,26E-03 | Dnaaf3        | 0,81 | Yes |
| ENSMUSG00000055811 | -1,89E+00 | -3,1076441   | 1,42E+00 | 2,33E-01 | 5,50E-01 | Cldn17        | 0,27 | No  |
| ENSMUSG00000055817 | -8,50E-02 | 4,836702791  | 1,24E+00 | 2,65E-01 | 5,61E-01 | Mta3          | 0,94 | No  |
| ENSMUSG00000055818 | -5,15E-02 | 0,259500421  | 4,02E-02 | 8,41E-01 | 9,84E-01 | A230083G16Rik | 0,96 | No  |
| ENSMUSG00000055820 | -1,94E+00 | -3,107619243 | 1,50E+00 | 2,21E-01 | 5,50E-01 | Olfir967      | 0,26 | No  |
| ENSMUSG00000055826 | -9,44E-01 | -2,600722178 | 7,82E-01 | 3,77E-01 | 6,78E-01 | Tescl         | 0,52 | No  |
| ENSMUSG00000055833 | 3,81E-01  | 1,471992276  | 4,50E+00 | 3,40E-02 | 2,17E-01 | 1700034H15Rik | 1,30 | No  |



|                    |           |              |           |          |          |               |      |     |
|--------------------|-----------|--------------|-----------|----------|----------|---------------|------|-----|
| ENSMUSG00000055835 | -1,34E-01 | 3,115622655  | 1,51E+00  | 2,19E-01 | 5,50E-01 | Zfp1          | 0,91 | No  |
| ENSMUSG00000055839 | -1,08E-01 | 5,049082037  | 2,18E+00  | 1,40E-01 | 4,72E-01 | Elob          | 0,93 | No  |
| ENSMUSG00000055850 | -7,05E-02 | 6,549264998  | 1,28E+00  | 2,58E-01 | 5,50E-01 | Rnf181        | 0,95 | No  |
| ENSMUSG00000055862 | -5,85E-01 | 3,761162793  | 4,15E+01  | 1,16E-10 | 1,09E-08 | Izumo4        | 0,67 | Yes |
| ENSMUSG00000055865 | 1,63E-02  | 1,352101464  | 8,22E-03  | 9,28E-01 | 1,00E+00 | Fam19a3       | 1,01 | No  |
| ENSMUSG00000055866 | 7,37E-02  | 3,195110966  | 4,61E-01  | 4,97E-01 | 7,82E-01 | Per2          | 1,05 | No  |
| ENSMUSG00000055872 | 1,91E+00  | -2,448678443 | 2,72E+00  | 9,91E-02 | 3,92E-01 | Gm9985        | 3,76 | No  |
| ENSMUSG00000055874 | 1,87E+00  | -3,107639691 | 1,38E+00  | 2,40E-01 | 5,50E-01 | Foxi3         | 3,67 | No  |
| ENSMUSG00000055882 | 4,14E-02  | -1,522686592 | 5,02E-03  | 9,44E-01 | 1,00E+00 | Abhd16b       | 1,03 | No  |
| ENSMUSG00000055884 | 2,42E-01  | 4,018262138  | 7,31E+00  | 6,85E-03 | 7,06E-02 | Fancm         | 1,18 | No  |
| ENSMUSG00000055891 | -3,83E-02 | -3,107651936 | -7,91E-11 | 1,00E+00 | 1,00E+00 | Ubl4b         | 0,97 | No  |
| ENSMUSG00000055895 | -2,66E+00 | -3,033639428 | 2,81E+00  | 9,35E-02 | 3,83E-01 | Oosp2         | 0,16 | No  |
| ENSMUSG00000055897 | -7,30E-02 | 4,926181736  | 9,63E-01  | 3,26E-01 | 6,27E-01 | Ppp4r1l-ps    | 0,95 | No  |
| ENSMUSG00000055900 | 1,61E-01  | 3,017953557  | 2,11E+00  | 1,46E-01 | 4,85E-01 | Tmem69        | 1,12 | No  |
| ENSMUSG00000055912 | -1,53E-01 | 2,483868863  | 1,38E+00  | 2,40E-01 | 5,50E-01 | Tmem150a      | 0,90 | No  |
| ENSMUSG00000055917 | 3,91E-02  | 4,165960182  | 2,09E-01  | 6,48E-01 | 8,75E-01 | Zfp277        | 1,03 | No  |
| ENSMUSG00000055923 | 1,83E-01  | 3,193704446  | 3,01E+00  | 8,29E-02 | 3,70E-01 | Aasdh         | 1,14 | No  |
| ENSMUSG00000055926 | -4,21E-03 | 0,672583856  | 3,35E-04  | 9,85E-01 | 1,00E+00 | Gm14137       | 1,00 | No  |
| ENSMUSG00000055932 | 4,84E-02  | 5,663295545  | 5,11E-01  | 4,75E-01 | 7,63E-01 | Fto           | 1,03 | No  |
| ENSMUSG00000055937 | -1,94E+00 | -3,107619243 | 1,50E+00  | 2,21E-01 | 5,50E-01 | Krt28         | 0,26 | No  |
| ENSMUSG00000055943 | 1,47E-03  | 5,905910131  | 4,98E-04  | 9,82E-01 | 1,00E+00 | Emc7          | 1,00 | No  |
| ENSMUSG00000055945 | -4,53E-01 | -2,226248983 | 2,09E-01  | 6,48E-01 | 8,75E-01 | Prr18         | 0,73 | No  |
| ENSMUSG00000055963 | 8,44E-01  | -0,461102551 | 4,96E+00  | 2,59E-02 | 1,80E-01 | Triqk         | 1,79 | No  |
| ENSMUSG00000055968 | 2,27E-01  | 0,522879862  | 8,44E-01  | 3,58E-01 | 6,60E-01 | Gm9988        | 1,17 | No  |
| ENSMUSG00000055972 | -2,25E-02 | -2,963247595 | 1,86E-11  | 1,00E+00 | 1,00E+00 | 2810407A14Rik | 0,98 | No  |
| ENSMUSG00000055976 | 6,58E-01  | -2,107645747 | 8,80E-01  | 3,48E-01 | 6,49E-01 | Cldn23        | 1,58 | No  |
| ENSMUSG00000055978 | -2,94E-01 | -2,226261287 | 1,50E-01  | 6,98E-01 | 9,04E-01 | Fut2          | 0,82 | No  |
| ENSMUSG00000055980 | 1,35E-01  | -2,107590366 | 3,15E-02  | 8,59E-01 | 9,95E-01 | Irs1          | 1,10 | No  |
| ENSMUSG00000055991 | -1,45E-01 | 3,143922941  | 1,83E+00  | 1,76E-01 | 5,34E-01 | Zkscan5       | 0,90 | No  |
| ENSMUSG00000055994 | -2,39E-01 | 4,217382227  | 8,08E+00  | 4,49E-03 | 5,14E-02 | Nod2          | 0,85 | No  |
| ENSMUSG00000056004 | -6,89E-02 | 1,607493098  | 1,62E-01  | 6,87E-01 | 8,98E-01 | 9330182L06Rik | 0,95 | No  |
| ENSMUSG00000056008 | -2,63E-02 | -3,033641358 | 2,33E-04  | 9,88E-01 | 1,00E+00 | Gm11541       | 0,98 | No  |

|                    |           |              |          |          |          |               |      |     |
|--------------------|-----------|--------------|----------|----------|----------|---------------|------|-----|
| ENSMUSG00000056014 | 5,90E-04  | 1,820713769  | 1,37E-05 | 9,97E-01 | 1,00E+00 | A430033K04Rik | 1,00 | No  |
| ENSMUSG00000056018 | -7,53E-02 | -2,600750449 | 3,76E-03 | 9,51E-01 | 1,00E+00 | Ccdc7b        | 0,95 | No  |
| ENSMUSG00000056019 | -5,16E-03 | 3,740982071  | 3,10E-03 | 9,56E-01 | 1,00E+00 | Zfp709        | 1,00 | No  |
| ENSMUSG00000056025 | -3,20E+00 | -2,963227503 | 4,31E+00 | 3,79E-02 | 2,31E-01 | Clca3a1       | 0,11 | No  |
| ENSMUSG00000056031 | -1,23E-01 | -1,600684126 | 4,87E-02 | 8,25E-01 | 9,74E-01 | 9330154J02Rik | 0,92 | No  |
| ENSMUSG00000056043 | 1,14E-01  | -2,185659854 | 2,58E-02 | 8,72E-01 | 1,00E+00 | Rgs9bp        | 1,08 | No  |
| ENSMUSG00000056050 | 7,34E-02  | 5,993789968  | 1,25E+00 | 2,64E-01 | 5,58E-01 | Mia3          | 1,05 | No  |
| ENSMUSG00000056054 | -3,38E-01 | 2,938684163  | 8,73E+00 | 3,12E-03 | 3,95E-02 | S100a8        | 0,79 | Yes |
| ENSMUSG00000056055 | 1,65E-01  | -0,535233566 | 1,92E-01 | 6,62E-01 | 8,83E-01 | Sag           | 1,12 | No  |
| ENSMUSG00000056069 | 1,59E-01  | 6,53457725   | 6,48E+00 | 1,09E-02 | 9,96E-02 | Fam105a       | 1,12 | No  |
| ENSMUSG00000056071 | -6,98E-01 | 2,366518189  | 2,71E+01 | 1,90E-07 | 9,96E-06 | S100a9        | 0,62 | Yes |
| ENSMUSG00000056073 | -2,69E+00 | -2,831970912 | 2,88E+00 | 8,99E-02 | 3,80E-01 | Grik2         | 0,15 | No  |
| ENSMUSG00000056076 | 1,20E-01  | 7,46334245   | 4,09E+00 | 4,30E-02 | 2,47E-01 | Eif3b         | 1,09 | No  |
| ENSMUSG00000056078 | 1,24E+00  | -1,963290138 | 3,24E+00 | 7,17E-02 | 3,40E-01 | Lipm          | 2,36 | No  |
| ENSMUSG00000056089 | -3,22E+00 | -2,770637488 | 4,36E+00 | 3,68E-02 | 2,28E-01 | Gm5468        | 0,11 | No  |
| ENSMUSG00000056091 | 6,38E-02  | 5,799973914  | 9,09E-01 | 3,40E-01 | 6,41E-01 | St3gal5       | 1,05 | No  |
| ENSMUSG00000056116 | -2,04E-01 | 6,202556512  | 1,02E+01 | 1,43E-03 | 2,15E-02 | H2-T22        | 0,87 | Yes |
| ENSMUSG00000056121 | 1,82E-01  | 4,902833609  | 5,85E+00 | 1,55E-02 | 1,29E-01 | Fez2          | 1,13 | No  |
| ENSMUSG00000056124 | 2,12E-01  | 6,171296579  | 1,08E+01 | 1,00E-03 | 1,62E-02 | B4galt6       | 1,16 | Yes |
| ENSMUSG00000056130 | 2,66E-01  | 4,983307915  | 1,30E+01 | 3,11E-04 | 6,24E-03 | Ticam2        | 1,20 | Yes |
| ENSMUSG00000056131 | -3,77E-02 | 3,57933507   | 1,50E-01 | 6,99E-01 | 9,04E-01 | Pgm3          | 0,97 | No  |
| ENSMUSG00000056133 | 5,99E-01  | -1,998045256 | 6,68E-01 | 4,14E-01 | 7,09E-01 | Gm9992        | 1,51 | No  |
| ENSMUSG00000056144 | -2,43E-01 | 3,570884803  | 6,55E+00 | 1,05E-02 | 9,69E-02 | Trim34a       | 0,85 | No  |
| ENSMUSG00000056145 | 4,18E-01  | 7,622557572  | 4,93E+01 | 2,14E-12 | 2,48E-10 | AI504432      | 1,34 | Yes |
| ENSMUSG00000056148 | 1,23E-01  | -2,62763472  | 1,47E-02 | 9,04E-01 | 1,00E+00 | Rdh9          | 1,09 | No  |
| ENSMUSG00000056153 | 4,33E-01  | 7,363488912  | 5,22E+01 | 5,10E-13 | 6,45E-11 | Socs6         | 1,35 | Yes |
| ENSMUSG00000056155 | 7,73E-01  | -2,896122969 | 3,27E-01 | 5,68E-01 | 8,29E-01 | Nanos3        | 1,71 | No  |
| ENSMUSG00000056162 | 1,85E+00  | -3,107657832 | 1,35E+00 | 2,46E-01 | 5,50E-01 | Cndp1         | 3,61 | No  |
| ENSMUSG00000056167 | 3,11E-02  | 5,121417581  | 1,82E-01 | 6,70E-01 | 8,88E-01 | Cnot10        | 1,02 | No  |
| ENSMUSG00000056174 | 3,17E+00  | -2,963263597 | 4,11E+00 | 4,28E-02 | 2,46E-01 | Col8a2        | 8,99 | No  |
| ENSMUSG00000056184 | -1,94E+00 | -3,107619243 | 1,50E+00 | 2,21E-01 | 5,50E-01 | Olfr283       | 0,26 | No  |
| ENSMUSG00000056185 | -1,51E-01 | 3,211443177  | 2,09E+00 | 1,48E-01 | 4,87E-01 | Snx32         | 0,90 | No  |

|                    |           |              |          |          |          |               |      |     |
|--------------------|-----------|--------------|----------|----------|----------|---------------|------|-----|
| ENSMUSG00000056201 | -1,31E-02 | 9,900782855  | 5,45E-02 | 8,15E-01 | 9,69E-01 | Cfl1          | 0,99 | No  |
| ENSMUSG00000056203 | -7,21E-02 | -2,401441207 | 5,96E-03 | 9,38E-01 | 1,00E+00 | Tas2r135      | 0,95 | No  |
| ENSMUSG00000056204 | 3,79E-02  | 4,695742422  | 2,45E-01 | 6,21E-01 | 8,57E-01 | Pgpep1        | 1,03 | No  |
| ENSMUSG00000056209 | -5,91E-02 | 2,051368291  | 1,59E-01 | 6,90E-01 | 8,99E-01 | Npm3          | 0,96 | No  |
| ENSMUSG00000056211 | 1,46E-01  | 6,303442284  | 5,23E+00 | 2,23E-02 | 1,62E-01 | R3hdm1        | 1,11 | No  |
| ENSMUSG00000056214 | -8,93E-01 | 0,087496201  | 9,72E+00 | 1,83E-03 | 2,60E-02 | Pard6g        | 0,54 | Yes |
| ENSMUSG00000056215 | -1,87E+00 | -3,033619006 | 1,41E+00 | 2,36E-01 | 5,50E-01 | Lrguk         | 0,27 | No  |
| ENSMUSG00000056216 | 1,26E-01  | 5,69336948   | 3,51E+00 | 6,09E-02 | 3,06E-01 | Cebpg         | 1,09 | No  |
| ENSMUSG00000056219 | -1,53E-01 | 0,175903026  | 2,88E-01 | 5,91E-01 | 8,42E-01 | Tmem229b-ps   | 0,90 | No  |
| ENSMUSG00000056220 | 2,00E-01  | 4,918673007  | 7,02E+00 | 8,07E-03 | 7,95E-02 | Pla2g4a       | 1,15 | No  |
| ENSMUSG00000056222 | 2,64E+00  | -3,033673223 | 2,69E+00 | 1,01E-01 | 3,92E-01 | Spock1        | 6,23 | No  |
| ENSMUSG00000056228 | 6,11E-02  | 4,148525162  | 5,22E-01 | 4,70E-01 | 7,58E-01 | Cars2         | 1,04 | No  |
| ENSMUSG00000056234 | -2,05E-01 | 6,544155125  | 1,08E+01 | 9,97E-04 | 1,61E-02 | Ncoa4         | 0,87 | Yes |
| ENSMUSG00000056257 | -3,25E-01 | -1,655087362 | 2,95E-01 | 5,87E-01 | 8,40E-01 | Gm5447        | 0,80 | No  |
| ENSMUSG00000056258 | 6,63E-01  | 0,644282409  | 7,51E+00 | 6,13E-03 | 6,51E-02 | Kcnq3         | 1,58 | No  |
| ENSMUSG00000056260 | 1,74E-02  | 4,777466689  | 5,19E-02 | 8,20E-01 | 9,71E-01 | Lrif1         | 1,01 | No  |
| ENSMUSG00000056267 | -1,65E-02 | 4,030900985  | 3,51E-02 | 8,51E-01 | 9,90E-01 | Cep70         | 0,99 | No  |
| ENSMUSG00000056268 | 9,54E-02  | 6,919126943  | 2,44E+00 | 1,18E-01 | 4,27E-01 | Dennd1b       | 1,07 | No  |
| ENSMUSG00000056271 | 2,89E-01  | -1,497628586 | 2,42E-01 | 6,23E-01 | 8,58E-01 | Lman1l        | 1,22 | No  |
| ENSMUSG00000056288 | -1,89E+00 | -3,1076441   | 1,42E+00 | 2,33E-01 | 5,50E-01 | Gm11961       | 0,27 | No  |
| ENSMUSG00000056290 | 5,45E-01  | -0,676348197 | 2,07E+00 | 1,50E-01 | 4,91E-01 | Ms4a4b        | 1,46 | No  |
| ENSMUSG00000056293 | 1,81E+00  | -3,10765737  | 1,28E+00 | 2,58E-01 | 5,50E-01 | Gsdmc2        | 3,49 | No  |
| ENSMUSG00000056300 | 2,79E-01  | -1,366846749 | 3,07E-01 | 5,79E-01 | 8,36E-01 | Zfp981        | 1,21 | No  |
| ENSMUSG00000056305 | 5,58E-02  | 5,136274632  | 5,89E-01 | 4,43E-01 | 7,34E-01 | Usp39         | 1,04 | No  |
| ENSMUSG00000056310 | 1,19E-02  | 4,381148222  | 2,08E-02 | 8,85E-01 | 1,00E+00 | Tyw1          | 1,01 | No  |
| ENSMUSG00000056313 | 1,87E+00  | -3,107639691 | 1,38E+00 | 2,40E-01 | 5,50E-01 | 1810011O10Rik | 3,67 | No  |
| ENSMUSG00000056342 | -4,91E-02 | 7,01857962   | 6,56E-01 | 4,18E-01 | 7,13E-01 | Usp34         | 0,97 | No  |
| ENSMUSG00000056366 | 3,23E-01  | 0,742117998  | 1,99E+00 | 1,59E-01 | 5,05E-01 | Fabp3-ps1     | 1,25 | No  |
| ENSMUSG00000056367 | -9,59E-01 | -0,070020505 | 1,06E+01 | 1,12E-03 | 1,77E-02 | Actr3b        | 0,51 | Yes |
| ENSMUSG00000056383 | 9,49E-02  | 4,687545968  | 1,54E+00 | 2,15E-01 | 5,50E-01 | AI987944      | 1,07 | No  |
| ENSMUSG00000056394 | 1,83E-01  | 5,164438809  | 6,37E+00 | 1,16E-02 | 1,04E-01 | Lig1          | 1,14 | No  |
| ENSMUSG00000056399 | -1,04E+00 | -0,997888869 | 5,99E+00 | 1,44E-02 | 1,22E-01 | Prss34        | 0,49 | No  |

|                    |           |              |           |          |          |               |      |     |
|--------------------|-----------|--------------|-----------|----------|----------|---------------|------|-----|
| ENSMUSG00000056411 | 7,68E-03  | 2,128117742  | 2,90E-03  | 9,57E-01 | 1,00E+00 | Gm12500       | 1,01 | No  |
| ENSMUSG00000056412 | -2,83E-02 | 5,400479069  | 1,63E-01  | 6,86E-01 | 8,97E-01 | Gm12396       | 0,98 | No  |
| ENSMUSG00000056413 | -1,98E-01 | 6,262013884  | 9,63E+00  | 1,91E-03 | 2,70E-02 | Adap1         | 0,87 | Yes |
| ENSMUSG00000056418 | 5,29E-01  | -0,697426505 | 1,76E+00  | 1,85E-01 | 5,49E-01 | BC043934      | 1,44 | No  |
| ENSMUSG00000056427 | 1,22E+00  | -2,770623536 | 9,24E-01  | 3,36E-01 | 6,37E-01 | Slit3         | 2,33 | No  |
| ENSMUSG00000056429 | -4,85E-02 | 7,942575584  | 6,92E-01  | 4,05E-01 | 7,02E-01 | Tgoln1        | 0,97 | No  |
| ENSMUSG00000056436 | 1,85E+00  | -3,107657832 | 1,35E+00  | 2,46E-01 | 5,50E-01 | Cyct          | 3,61 | No  |
| ENSMUSG00000056445 | -1,08E+00 | -2,247009345 | 1,45E+00  | 2,28E-01 | 5,50E-01 | Hoxaas2       | 0,47 | No  |
| ENSMUSG00000056458 | -1,65E-01 | -0,220981123 | 2,66E-01  | 6,06E-01 | 8,50E-01 | Mok           | 0,89 | No  |
| ENSMUSG00000056459 | 1,35E-01  | 2,819250683  | 1,30E+00  | 2,55E-01 | 5,50E-01 | Zbtb25        | 1,10 | No  |
| ENSMUSG00000056468 | 2,62E+00  | -3,033654625 | 2,66E+00  | 1,03E-01 | 3,95E-01 | 5730596B20Rik | 6,16 | No  |
| ENSMUSG00000056476 | -1,27E-01 | 2,330147258  | 8,81E-01  | 3,48E-01 | 6,49E-01 | Med12l        | 0,92 | No  |
| ENSMUSG00000056481 | 9,01E-03  | -3,107646452 | -5,16E-10 | 1,00E+00 | 1,00E+00 | Cd248         | 1,01 | No  |
| ENSMUSG00000056486 | -6,99E-01 | -2,89609921  | 1,96E-01  | 6,58E-01 | 8,81E-01 | Chn1          | 0,62 | No  |
| ENSMUSG00000056487 | -1,65E-02 | -0,808643921 | 1,60E-03  | 9,68E-01 | 1,00E+00 | Mettl7a2      | 0,99 | No  |
| ENSMUSG00000056492 | -1,77E-01 | -1,770626587 | 9,92E-02  | 7,53E-01 | 9,33E-01 | Adgrf5        | 0,88 | No  |
| ENSMUSG00000056493 | -5,43E-02 | 6,132532698  | 7,13E-01  | 3,99E-01 | 6,98E-01 | Foxk1         | 0,96 | No  |
| ENSMUSG00000056494 | 3,11E+00  | -2,770631362 | 3,94E+00  | 4,72E-02 | 2,60E-01 | Cngb3         | 8,61 | No  |
| ENSMUSG00000056498 | 9,21E-02  | 8,58582704   | 2,58E+00  | 1,08E-01 | 4,03E-01 | Tmem154       | 1,07 | No  |
| ENSMUSG00000056501 | 2,76E-01  | 7,432525355  | 2,15E+01  | 3,47E-06 | 1,33E-04 | Cebpb         | 1,21 | Yes |
| ENSMUSG00000056508 | 4,50E-02  | 0,337747431  | 2,88E-02  | 8,65E-01 | 9,98E-01 | 1700001K19Rik | 1,03 | No  |
| ENSMUSG00000056515 | 2,13E-01  | 6,564947521  | 1,16E+01  | 6,67E-04 | 1,16E-02 | Rab31         | 1,16 | Yes |
| ENSMUSG00000056529 | -5,92E-02 | 6,927785629  | 9,44E-01  | 3,31E-01 | 6,32E-01 | Ptafr         | 0,96 | No  |
| ENSMUSG00000056531 | 3,95E-01  | 1,889574189  | 6,32E+00  | 1,19E-02 | 1,06E-01 | Ccdc18        | 1,32 | No  |
| ENSMUSG00000056536 | 2,81E-02  | 5,828121605  | 1,78E-01  | 6,73E-01 | 8,90E-01 | Pign          | 1,02 | No  |
| ENSMUSG00000056569 | -5,98E-02 | -1,711559838 | 1,08E-02  | 9,17E-01 | 1,00E+00 | Mpz           | 0,96 | No  |
| ENSMUSG00000056579 | -9,13E-02 | 6,569101229  | 2,14E+00  | 1,43E-01 | 4,78E-01 | Tug1          | 0,94 | No  |
| ENSMUSG00000056592 | 6,85E-01  | 3,275972018  | 4,19E+01  | 9,58E-11 | 9,08E-09 | Zfp658        | 1,61 | Yes |
| ENSMUSG00000056596 | 8,64E-01  | 0,175658626  | 9,19E+00  | 2,43E-03 | 3,26E-02 | Trnp1         | 1,82 | Yes |
| ENSMUSG00000056598 | -4,78E-01 | -1,424895453 | 7,95E-01  | 3,73E-01 | 6,74E-01 | Drc3          | 0,72 | No  |
| ENSMUSG00000056600 | 1,81E+00  | -3,10765737  | 1,28E+00  | 2,58E-01 | 5,50E-01 | Olf90         | 3,49 | No  |
| ENSMUSG00000056602 | 1,44E-01  | 4,960884166  | 3,68E+00  | 5,50E-02 | 2,87E-01 | Fry           | 1,11 | No  |

|                    |           |              |          |          |          |               |      |     |
|--------------------|-----------|--------------|----------|----------|----------|---------------|------|-----|
| ENSMUSG00000056605 | -1,87E+00 | -3,107637761 | 1,39E+00 | 2,38E-01 | 5,50E-01 | Krt72         | 0,27 | No  |
| ENSMUSG00000056608 | 1,58E-02  | 6,572599111  | 6,37E-02 | 8,01E-01 | 9,61E-01 | Chd9          | 1,01 | No  |
| ENSMUSG00000056612 | 1,77E-01  | 5,403356814  | 6,40E+00 | 1,14E-02 | 1,03E-01 | Ppp1r14b      | 1,13 | No  |
| ENSMUSG00000056617 | -1,90E+00 | -3,033594154 | 1,44E+00 | 2,30E-01 | 5,50E-01 | 4931429L15Rik | 0,27 | No  |
| ENSMUSG00000056629 | 5,89E-02  | 4,61857142   | 5,61E-01 | 4,54E-01 | 7,44E-01 | Fkbp2         | 1,04 | No  |
| ENSMUSG00000056643 | -5,36E-01 | -1,033717495 | 1,26E+00 | 2,62E-01 | 5,55E-01 | Chst13        | 0,69 | No  |
| ENSMUSG00000056648 | -5,25E-02 | -3,033661434 | 4,08E-11 | 1,00E+00 | 1,00E+00 | Hoxb8         | 0,96 | No  |
| ENSMUSG00000056656 | 2,72E-01  | 2,743124237  | 4,68E+00 | 3,06E-02 | 2,02E-01 | Apol8         | 1,21 | No  |
| ENSMUSG00000056665 | -1,06E-01 | 1,955246088  | 4,74E-01 | 4,91E-01 | 7,77E-01 | Them6         | 0,93 | No  |
| ENSMUSG00000056666 | 2,86E-02  | 4,151434106  | 1,08E-01 | 7,42E-01 | 9,27E-01 | Retsat        | 1,02 | No  |
| ENSMUSG00000056671 | -4,43E-02 | 2,604468596  | 1,27E-01 | 7,22E-01 | 9,16E-01 | Preli2        | 0,97 | No  |
| ENSMUSG00000056682 | -1,39E+00 | -2,311230225 | 1,91E+00 | 1,67E-01 | 5,20E-01 | 4930465K10Rik | 0,38 | No  |
| ENSMUSG00000056687 | 3,57E-02  | 3,242759082  | 1,12E-01 | 7,38E-01 | 9,25E-01 | Gm11696       | 1,03 | No  |
| ENSMUSG00000056692 | -1,46E-01 | 7,898065608  | 6,25E+00 | 1,24E-02 | 1,09E-01 | D17Wsu92e     | 0,90 | No  |
| ENSMUSG00000056698 | -6,31E-02 | 2,85634298   | 2,94E-01 | 5,88E-01 | 8,40E-01 | Elmod3        | 0,96 | No  |
| ENSMUSG00000056699 | -1,87E+00 | -3,107637761 | 1,39E+00 | 2,38E-01 | 5,50E-01 | Gm5533        | 0,27 | No  |
| ENSMUSG00000056708 | 2,93E-02  | 7,480644208  | 2,45E-01 | 6,21E-01 | 8,57E-01 | Ier5          | 1,02 | No  |
| ENSMUSG00000056716 | -1,86E+00 | -2,448676679 | 4,05E+00 | 4,41E-02 | 2,50E-01 | Gm5420        | 0,27 | No  |
| ENSMUSG00000056718 | 4,57E-01  | 0,615841604  | 3,71E+00 | 5,42E-02 | 2,85E-01 | Gm13199       | 1,37 | No  |
| ENSMUSG00000056724 | 2,25E-01  | 7,226982142  | 1,40E+01 | 1,79E-04 | 3,95E-03 | Nbeal2        | 1,17 | Yes |
| ENSMUSG00000056735 | -4,95E-01 | 0,499507679  | 4,63E+00 | 3,13E-02 | 2,05E-01 | A930024E05Rik | 0,71 | No  |
| ENSMUSG00000056737 | 1,47E-01  | 9,501531301  | 6,75E+00 | 9,37E-03 | 8,90E-02 | Capg          | 1,11 | No  |
| ENSMUSG00000056738 | -2,16E+00 | -2,711711741 | 3,68E+00 | 5,51E-02 | 2,88E-01 | A730036I17Rik | 0,22 | No  |
| ENSMUSG00000056749 | -3,14E-01 | 6,006243181  | 2,32E+01 | 1,45E-06 | 6,14E-05 | Nfil3         | 0,80 | Yes |
| ENSMUSG00000056752 | -2,95E-01 | -1,522576982 | 2,85E-01 | 5,94E-01 | 8,43E-01 | Dnah9         | 0,81 | No  |
| ENSMUSG00000056753 | 1,37E-01  | 0,221893765  | 2,81E-01 | 5,96E-01 | 8,45E-01 | C330011M18Rik | 1,10 | No  |
| ENSMUSG00000056758 | -2,89E-01 | -2,627597878 | 7,10E-02 | 7,90E-01 | 9,54E-01 | Hmga2         | 0,82 | No  |
| ENSMUSG00000056763 | -1,01E-01 | 4,534738411  | 1,58E+00 | 2,08E-01 | 5,50E-01 | Cspp1         | 0,93 | No  |
| ENSMUSG00000056770 | 1,31E-02  | 6,725889512  | 4,54E-02 | 8,31E-01 | 9,78E-01 | Setd3         | 1,01 | No  |
| ENSMUSG00000056771 | -5,88E-02 | -3,033652696 | 1,62E-03 | 9,68E-01 | 1,00E+00 | Gm10010       | 0,96 | No  |
| ENSMUSG00000056772 | 1,03E-01  | -0,726240632 | 6,54E-02 | 7,98E-01 | 9,59E-01 | Rps6-ps2      | 1,07 | No  |
| ENSMUSG00000056777 | -6,07E-01 | -2,448636781 | 5,03E-01 | 4,78E-01 | 7,66E-01 | Rpl21-ps13    | 0,66 | No  |

|                    |           |              |          |          |          |               |       |     |
|--------------------|-----------|--------------|----------|----------|----------|---------------|-------|-----|
| ENSMUSG00000056820 | 3,22E-02  | 5,726254822  | 2,29E-01 | 6,32E-01 | 8,64E-01 | Tsnax         | 1,02  | No  |
| ENSMUSG00000056821 | -1,72E+00 | -2,448652536 | 3,26E+00 | 7,12E-02 | 3,38E-01 | 1700028I16Rik | 0,30  | No  |
| ENSMUSG00000056824 | -2,71E+00 | -3,033620915 | 2,92E+00 | 8,75E-02 | 3,78E-01 | Zfp663        | 0,15  | No  |
| ENSMUSG00000056829 | 3,51E+00  | -2,83205728  | 5,36E+00 | 2,06E-02 | 1,54E-01 | Foxb2         | 11,42 | No  |
| ENSMUSG00000056832 | 1,13E+00  | -1,801042781 | 2,60E+00 | 1,07E-01 | 4,00E-01 | Ttc26         | 2,19  | No  |
| ENSMUSG00000056836 | -8,99E-02 | 3,928088442  | 1,01E+00 | 3,15E-01 | 6,15E-01 | Gm6851        | 0,94  | No  |
| ENSMUSG00000056849 | -1,21E+00 | -2,448597519 | 1,89E+00 | 1,69E-01 | 5,24E-01 | Gm16415       | 0,43  | No  |
| ENSMUSG00000056851 | -5,50E-02 | 7,370161889  | 8,52E-01 | 3,56E-01 | 6,57E-01 | Pcbp2         | 0,96  | No  |
| ENSMUSG00000056856 | 1,88E+00  | -2,896170024 | 1,82E+00 | 1,77E-01 | 5,37E-01 | Jakmip3       | 3,67  | No  |
| ENSMUSG00000056863 | -8,41E-01 | -2,89611984  | 3,88E-01 | 5,33E-01 | 8,06E-01 | Olf702        | 0,56  | No  |
| ENSMUSG00000056870 | -1,83E+00 | -2,226255286 | 5,29E+00 | 2,15E-02 | 1,58E-01 | Gulp1         | 0,28  | No  |
| ENSMUSG00000056880 | -3,11E-01 | 6,360566367  | 2,40E+01 | 9,48E-07 | 4,24E-05 | Gad11         | 0,81  | Yes |
| ENSMUSG00000056888 | -2,86E-01 | 7,327502746  | 2,28E+01 | 1,76E-06 | 7,27E-05 | Glipr1        | 0,82  | Yes |
| ENSMUSG00000056895 | 2,54E-01  | -0,963340957 | 3,52E-01 | 5,53E-01 | 8,19E-01 | Hist3h2ba     | 1,19  | No  |
| ENSMUSG00000056899 | -2,29E-01 | -0,711491781 | 3,49E-01 | 5,55E-01 | 8,20E-01 | Immp2l        | 0,85  | No  |
| ENSMUSG00000056900 | -5,47E-03 | -2,963221188 | 1,50E-05 | 9,97E-01 | 1,00E+00 | Usp13         | 1,00  | No  |
| ENSMUSG00000056904 | 4,08E-02  | 6,398339459  | 4,15E-01 | 5,20E-01 | 7,99E-01 | Gm5620        | 1,03  | No  |
| ENSMUSG00000056917 | 1,13E-01  | 6,703448455  | 3,32E+00 | 6,84E-02 | 3,29E-01 | Sipa1         | 1,08  | No  |
| ENSMUSG00000056919 | 5,50E-02  | 4,44729641   | 4,66E-01 | 4,95E-01 | 7,81E-01 | Cep162        | 1,04  | No  |
| ENSMUSG00000056938 | -3,45E-02 | 2,598725541  | 7,36E-02 | 7,86E-01 | 9,52E-01 | Acbd4         | 0,98  | No  |
| ENSMUSG00000056941 | -3,27E-03 | 5,492298828  | 2,25E-03 | 9,62E-01 | 1,00E+00 | Commd7        | 1,00  | No  |
| ENSMUSG00000056943 | -1,14E-01 | 1,80898077   | 5,23E-01 | 4,70E-01 | 7,58E-01 | Gm10015       | 0,92  | No  |
| ENSMUSG00000056952 | -7,43E-03 | 6,890649298  | 1,47E-02 | 9,03E-01 | 1,00E+00 | Tatdn2        | 0,99  | No  |
| ENSMUSG00000056962 | 5,18E-02  | 5,033769236  | 4,96E-01 | 4,81E-01 | 7,69E-01 | Jmjd6         | 1,04  | No  |
| ENSMUSG00000056966 | -2,66E+00 | -3,033639428 | 2,81E+00 | 9,35E-02 | 3,83E-01 | Gjc3          | 0,16  | No  |
| ENSMUSG00000056978 | -4,14E-01 | -1,885259429 | 4,63E-01 | 4,96E-01 | 7,82E-01 | Hamp2         | 0,75  | No  |
| ENSMUSG00000056987 | -2,71E+00 | -3,033620915 | 2,92E+00 | 8,75E-02 | 3,78E-01 | Fam71d        | 0,15  | No  |
| ENSMUSG00000056999 | 1,02E-01  | 5,779204483  | 2,31E+00 | 1,28E-01 | 4,49E-01 | Ide           | 1,07  | No  |
| ENSMUSG00000057036 | -1,04E-01 | 8,761183799  | 3,34E+00 | 6,77E-02 | 3,28E-01 | Gm7536        | 0,93  | No  |
| ENSMUSG00000057047 | -1,94E+00 | -3,107619243 | 1,50E+00 | 2,21E-01 | 5,50E-01 | 1700010B08Rik | 0,26  | No  |
| ENSMUSG00000057050 | -1,87E+00 | -3,107637761 | 1,39E+00 | 2,38E-01 | 5,50E-01 | Olf397        | 0,27  | No  |
| ENSMUSG00000057054 | -6,52E-01 | 0,075075474  | 5,14E+00 | 2,34E-02 | 1,68E-01 | Inca1         | 0,64  | No  |

|                    |           |              |          |          |          |               |      |     |
|--------------------|-----------|--------------|----------|----------|----------|---------------|------|-----|
| ENSMUSG00000057058 | -8,49E-01 | -2,896162345 | 3,95E-01 | 5,30E-01 | 8,05E-01 | Skap1         | 0,56 | No  |
| ENSMUSG00000057060 | -3,88E-03 | -3,03362684  | 4,02E-12 | 1,00E+00 | 1,00E+00 | Slc35f3       | 1,00 | No  |
| ENSMUSG00000057068 | 1,87E+00  | -3,107639691 | 1,38E+00 | 2,40E-01 | 5,50E-01 | Fam47e        | 3,67 | No  |
| ENSMUSG00000057069 | -1,77E-02 | 5,992648179  | 7,35E-02 | 7,86E-01 | 9,52E-01 | Ero1lb        | 0,99 | No  |
| ENSMUSG00000057072 | 6,69E-01  | -1,68319466  | 1,46E+00 | 2,26E-01 | 5,50E-01 | Spata45       | 1,59 | No  |
| ENSMUSG00000057092 | -4,05E-01 | 1,368924869  | 5,27E+00 | 2,17E-02 | 1,59E-01 | Fxyd3         | 0,76 | No  |
| ENSMUSG00000057093 | 2,79E-01  | -0,065710314 | 9,04E-01 | 3,42E-01 | 6,42E-01 | Zfp607b       | 1,21 | No  |
| ENSMUSG00000057098 | -4,15E-01 | -2,655106428 | 1,75E-01 | 6,76E-01 | 8,91E-01 | Ebf1          | 0,75 | No  |
| ENSMUSG00000057101 | 1,73E-02  | 4,90353205   | 5,32E-02 | 8,18E-01 | 9,70E-01 | Zfp180        | 1,01 | No  |
| ENSMUSG00000057103 | -3,76E-01 | -0,0748604   | 1,62E+00 | 2,04E-01 | 5,50E-01 | Nat8f1        | 0,77 | No  |
| ENSMUSG00000057110 | -4,76E-02 | 6,647790045  | 5,92E-01 | 4,42E-01 | 7,34E-01 | Cntrl         | 0,97 | No  |
| ENSMUSG00000057113 | -7,01E-02 | 6,273314582  | 1,21E+00 | 2,71E-01 | 5,67E-01 | Npm1          | 0,95 | No  |
| ENSMUSG00000057123 | 2,97E-01  | 3,525852954  | 8,92E+00 | 2,82E-03 | 3,66E-02 | Gja5          | 1,23 | Yes |
| ENSMUSG00000057130 | -6,98E-02 | 4,389687588  | 7,20E-01 | 3,96E-01 | 6,96E-01 | Txnl4a        | 0,95 | No  |
| ENSMUSG00000057132 | 1,34E-01  | 4,32491257   | 2,59E+00 | 1,07E-01 | 4,01E-01 | Rpgrip1       | 1,10 | No  |
| ENSMUSG00000057133 | -1,82E-02 | 5,320756309  | 6,63E-02 | 7,97E-01 | 9,58E-01 | Chd6          | 0,99 | No  |
| ENSMUSG00000057134 | -5,07E-02 | 6,528371343  | 6,52E-01 | 4,19E-01 | 7,15E-01 | Ado           | 0,97 | No  |
| ENSMUSG00000057135 | 2,62E-01  | 6,594278704  | 1,76E+01 | 2,78E-05 | 8,23E-04 | Scimp         | 1,20 | Yes |
| ENSMUSG00000057137 | -4,98E-02 | 3,969753694  | 3,21E-01 | 5,71E-01 | 8,32E-01 | Tmem140       | 0,97 | No  |
| ENSMUSG00000057143 | 2,89E-02  | 5,194453297  | 1,64E-01 | 6,86E-01 | 8,97E-01 | Trim12c       | 1,02 | No  |
| ENSMUSG00000057147 | 2,25E-01  | 3,439241994  | 4,93E+00 | 2,64E-02 | 1,82E-01 | Dph6          | 1,17 | No  |
| ENSMUSG00000057156 | -1,28E-01 | 3,203693425  | 1,50E+00 | 2,21E-01 | 5,50E-01 | Homez         | 0,91 | No  |
| ENSMUSG00000057157 | -9,11E-03 | 2,932353616  | 6,20E-03 | 9,37E-01 | 1,00E+00 | Gm6054        | 0,99 | No  |
| ENSMUSG00000057160 | 2,71E-02  | 4,135681633  | 9,52E-02 | 7,58E-01 | 9,35E-01 | Gm16372       | 1,02 | No  |
| ENSMUSG00000057163 | -9,11E-01 | -2,548213869 | 7,27E-01 | 3,94E-01 | 6,94E-01 | Prss2         | 0,53 | No  |
| ENSMUSG00000057173 | 1,86E+00  | -3,033661846 | 1,35E+00 | 2,46E-01 | 5,50E-01 | Rfx8          | 3,62 | No  |
| ENSMUSG00000057176 | 4,63E-02  | 3,638095722  | 2,31E-01 | 6,30E-01 | 8,63E-01 | Ccdc189       | 1,03 | No  |
| ENSMUSG00000057177 | 1,34E-02  | 5,670793482  | 3,92E-02 | 8,43E-01 | 9,85E-01 | Gsk3a         | 1,01 | No  |
| ENSMUSG00000057181 | 9,88E-02  | 4,07208763   | 1,28E+00 | 2,58E-01 | 5,50E-01 | 5730455P16Rik | 1,07 | No  |
| ENSMUSG00000057182 | 8,57E-01  | 4,88600804   | 1,20E+02 | 5,47E-28 | 2,65E-25 | Scn3a         | 1,81 | Yes |
| ENSMUSG00000057191 | 1,31E-02  | 5,124649142  | 3,25E-02 | 8,57E-01 | 9,94E-01 | AB124611      | 1,01 | No  |
| ENSMUSG00000057193 | -8,13E-03 | 5,931332876  | 1,52E-02 | 9,02E-01 | 1,00E+00 | Slc44a2       | 0,99 | No  |

|                    |           |              |          |          |          |            |      |     |
|--------------------|-----------|--------------|----------|----------|----------|------------|------|-----|
| ENSMUSG00000057219 | 8,66E-02  | 4,036422632  | 9,61E-01 | 3,27E-01 | 6,28E-01 | Armc7      | 1,06 | No  |
| ENSMUSG00000057223 | -1,83E-01 | 0,152391223  | 4,10E-01 | 5,22E-01 | 8,00E-01 | Gm6578     | 0,88 | No  |
| ENSMUSG00000057229 | 1,17E-01  | 4,630572418  | 2,18E+00 | 1,40E-01 | 4,73E-01 | Atp5sl     | 1,08 | No  |
| ENSMUSG00000057230 | 5,51E-02  | 6,50686755   | 7,71E-01 | 3,80E-01 | 6,81E-01 | Aak1       | 1,04 | No  |
| ENSMUSG00000057234 | 7,70E-02  | 1,602721374  | 1,96E-01 | 6,58E-01 | 8,81E-01 | Mettl15    | 1,05 | No  |
| ENSMUSG00000057236 | -4,13E-02 | 6,946134007  | 4,60E-01 | 4,97E-01 | 7,83E-01 | Rbbp4      | 0,97 | No  |
| ENSMUSG00000057244 | -1,58E-02 | 5,81857918   | 5,58E-02 | 8,13E-01 | 9,67E-01 | Gm6139     | 0,99 | No  |
| ENSMUSG00000057246 | 4,90E-01  | -1,627637713 | 7,43E-01 | 3,89E-01 | 6,89E-01 | BC051142   | 1,40 | No  |
| ENSMUSG00000057262 | -2,61E-01 | 6,097412629  | 1,62E+01 | 5,73E-05 | 1,53E-03 | Gm10020    | 0,83 | Yes |
| ENSMUSG00000057265 | -2,70E-03 | 0,266697682  | 1,04E-04 | 9,92E-01 | 1,00E+00 | Bbof1      | 1,00 | No  |
| ENSMUSG00000057278 | 1,19E-02  | 2,72747741   | 9,93E-03 | 9,21E-01 | 1,00E+00 | Snrpg      | 1,01 | No  |
| ENSMUSG00000057280 | -5,24E-02 | -2,963220811 | 1,25E-03 | 9,72E-01 | 1,00E+00 | Musk       | 0,96 | No  |
| ENSMUSG00000057286 | -9,39E-02 | 1,054052342  | 1,97E-01 | 6,58E-01 | 8,81E-01 | St6galnac2 | 0,94 | No  |
| ENSMUSG00000057315 | 2,13E-01  | 3,874229762  | 5,34E+00 | 2,09E-02 | 1,56E-01 | Arhgap24   | 1,16 | No  |
| ENSMUSG00000057321 | -1,55E+00 | -2,185543571 | 3,49E+00 | 6,17E-02 | 3,09E-01 | Usp17ld    | 0,34 | No  |
| ENSMUSG00000057322 | -1,82E-01 | 1,844436795  | 1,33E+00 | 2,49E-01 | 5,50E-01 | Rpl38      | 0,88 | No  |
| ENSMUSG00000057329 | 2,21E-01  | 5,547657541  | 1,03E+01 | 1,32E-03 | 2,03E-02 | Bcl2       | 1,17 | Yes |
| ENSMUSG00000057335 | 1,64E-01  | 6,254666766  | 6,63E+00 | 1,00E-02 | 9,36E-02 | Cep170     | 1,12 | No  |
| ENSMUSG00000057337 | -6,38E-01 | 1,341586111  | 1,29E+01 | 3,27E-04 | 6,50E-03 | Chst3      | 0,64 | Yes |
| ENSMUSG00000057342 | 8,64E-02  | 6,285369449  | 1,84E+00 | 1,75E-01 | 5,33E-01 | Sphk2      | 1,06 | No  |
| ENSMUSG00000057346 | -5,77E-01 | -2,548238494 | 2,60E-01 | 6,10E-01 | 8,51E-01 | Apol9a     | 0,67 | No  |
| ENSMUSG00000057359 | -2,81E-02 | 6,520587432  | 2,02E-01 | 6,53E-01 | 8,78E-01 | Gm17494    | 0,98 | No  |
| ENSMUSG00000057363 | -8,53E-02 | 4,647801025  | 1,20E+00 | 2,73E-01 | 5,69E-01 | Uxs1       | 0,94 | No  |
| ENSMUSG00000057367 | -5,15E-01 | 6,229866604  | 6,53E+01 | 6,36E-16 | 1,06E-13 | Birc2      | 0,70 | Yes |
| ENSMUSG00000057370 | -8,33E-01 | -2,963259277 | 3,79E-01 | 5,38E-01 | 8,09E-01 | Gm8724     | 0,56 | No  |
| ENSMUSG00000057375 | -8,14E-02 | 4,937022432  | 1,19E+00 | 2,76E-01 | 5,72E-01 | Yipf1      | 0,95 | No  |
| ENSMUSG00000057378 | -2,21E-01 | -0,91267096  | 2,76E-01 | 5,99E-01 | 8,46E-01 | Ryr3       | 0,86 | No  |
| ENSMUSG00000057388 | 1,32E-03  | 4,999775625  | 3,16E-04 | 9,86E-01 | 1,00E+00 | Mrpl18     | 1,00 | No  |
| ENSMUSG00000057396 | 5,00E-01  | 0,891978407  | 6,04E+00 | 1,40E-02 | 1,20E-01 | Zfp759     | 1,41 | No  |
| ENSMUSG00000057406 | 1,58E-01  | 7,048154012  | 6,80E+00 | 9,09E-03 | 8,70E-02 | Nsd2       | 1,12 | No  |
| ENSMUSG00000057409 | 2,94E-01  | 3,068431941  | 7,17E+00 | 7,43E-03 | 7,49E-02 | Zfp53      | 1,23 | No  |
| ENSMUSG00000057411 | -1,70E-02 | 4,759760373  | 4,90E-02 | 8,25E-01 | 9,74E-01 | Fam173a    | 0,99 | No  |



|                    |           |              |           |          |          |           |      |     |
|--------------------|-----------|--------------|-----------|----------|----------|-----------|------|-----|
| ENSMUSG00000057440 | 1,26E-01  | 3,148439318  | 1,37E+00  | 2,41E-01 | 5,50E-01 | Mpp7      | 1,09 | No  |
| ENSMUSG00000057465 | 1,79E+00  | -3,033666867 | 1,28E+00  | 2,58E-01 | 5,50E-01 | Saa2      | 3,46 | No  |
| ENSMUSG00000057469 | 2,11E-01  | 4,680856045  | 7,26E+00  | 7,05E-03 | 7,22E-02 | E2f6      | 1,16 | No  |
| ENSMUSG00000057497 | 5,01E-02  | 4,198443551  | 3,46E-01  | 5,56E-01 | 8,21E-01 | Fam136a   | 1,04 | No  |
| ENSMUSG00000057499 | -9,59E-02 | -2,832028611 | 6,37E-03  | 9,36E-01 | 1,00E+00 | Gm6177    | 0,94 | No  |
| ENSMUSG00000057503 | -2,02E+00 | -2,655093162 | 3,08E+00  | 7,93E-02 | 3,60E-01 | Olf1459   | 0,25 | No  |
| ENSMUSG00000057506 | -1,48E-01 | 4,384866376  | 3,29E+00  | 6,97E-02 | 3,33E-01 | Bloc1s2   | 0,90 | No  |
| ENSMUSG00000057522 | -4,16E-03 | 7,256179841  | 4,85E-03  | 9,44E-01 | 1,00E+00 | Spop      | 1,00 | No  |
| ENSMUSG00000057530 | 1,04E-01  | 6,40327762   | 2,70E+00  | 1,00E-01 | 3,92E-01 | Ece1      | 1,07 | No  |
| ENSMUSG00000057531 | 1,20E-01  | 6,042044986  | 3,39E+00  | 6,57E-02 | 3,21E-01 | Dtnbp1    | 1,09 | No  |
| ENSMUSG00000057534 | -1,90E+00 | -3,033594154 | 1,44E+00  | 2,30E-01 | 5,50E-01 | Elobl     | 0,27 | No  |
| ENSMUSG00000057541 | 6,96E-02  | 3,641332923  | 5,16E-01  | 4,72E-01 | 7,60E-01 | Pus7      | 1,05 | No  |
| ENSMUSG00000057551 | 1,51E-02  | 4,308923324  | 3,34E-02  | 8,55E-01 | 9,92E-01 | Zfp317    | 1,01 | No  |
| ENSMUSG00000057554 | 1,92E-01  | 6,353178231  | 9,10E+00  | 2,55E-03 | 3,38E-02 | Lgals8    | 1,14 | Yes |
| ENSMUSG00000057561 | 2,76E-02  | 6,657347826  | 1,98E-01  | 6,56E-01 | 8,80E-01 | Eif1a     | 1,02 | No  |
| ENSMUSG00000057564 | -2,63E-02 | -3,033641358 | 2,33E-04  | 9,88E-01 | 1,00E+00 | Olf1508   | 0,98 | No  |
| ENSMUSG00000057572 | 1,11E-01  | 3,201143241  | 1,06E+00  | 3,04E-01 | 6,01E-01 | Zbtb8os   | 1,08 | No  |
| ENSMUSG00000057580 | -5,35E-02 | 2,404156418  | 1,65E-01  | 6,85E-01 | 8,97E-01 | Gm10012   | 0,96 | No  |
| ENSMUSG00000057594 | 3,72E-02  | 2,947622252  | 1,07E-01  | 7,44E-01 | 9,28E-01 | Arl16     | 1,03 | No  |
| ENSMUSG00000057596 | -9,17E-02 | 5,326834798  | 1,71E+00  | 1,90E-01 | 5,50E-01 | Trim30d   | 0,94 | No  |
| ENSMUSG00000057604 | -8,79E-01 | -2,89610048  | 4,25E-01  | 5,15E-01 | 7,96E-01 | Lmcd1     | 0,54 | No  |
| ENSMUSG00000057605 | -1,42E-01 | 5,068452666  | 3,78E+00  | 5,17E-02 | 2,77E-01 | Gm6807    | 0,91 | No  |
| ENSMUSG00000057606 | -1,02E+00 | -1,816395684 | 2,15E+00  | 1,42E-01 | 4,77E-01 | Colq      | 0,49 | No  |
| ENSMUSG00000057614 | -2,66E+00 | -3,033639428 | 2,81E+00  | 9,35E-02 | 3,83E-01 | Gnai1     | 0,16 | No  |
| ENSMUSG00000057637 | -4,13E-02 | 6,533197626  | 4,38E-01  | 5,08E-01 | 7,92E-01 | Prdm2     | 0,97 | No  |
| ENSMUSG00000057649 | -3,25E-02 | 5,488667999  | 2,21E-01  | 6,39E-01 | 8,69E-01 | Brd9      | 0,98 | No  |
| ENSMUSG00000057654 | 3,14E-02  | -3,107617333 | -7,69E-10 | 1,00E+00 | 1,00E+00 | Olf1328   | 1,02 | No  |
| ENSMUSG00000057657 | -1,54E-01 | 7,525205129  | 6,79E+00  | 9,19E-03 | 8,77E-02 | Rps18-ps3 | 0,90 | No  |
| ENSMUSG00000057666 | 8,33E-02  | 6,913974839  | 1,87E+00  | 1,72E-01 | 5,28E-01 | Gapdh     | 1,06 | No  |
| ENSMUSG00000057667 | 1,08E-01  | 4,048984869  | 1,53E+00  | 2,16E-01 | 5,50E-01 | Bloc1s3   | 1,08 | No  |
| ENSMUSG00000057672 | 2,60E-02  | 7,92686888   | 1,98E-01  | 6,56E-01 | 8,80E-01 | Pkn1      | 1,02 | No  |
| ENSMUSG00000057685 | 1,87E+00  | -3,107639691 | 1,38E+00  | 2,40E-01 | 5,50E-01 | Gm8526    | 3,67 | No  |

|                    |           |              |           |          |          |               |      |     |
|--------------------|-----------|--------------|-----------|----------|----------|---------------|------|-----|
| ENSMUSG00000057691 | 1,21E-01  | 4,897302878  | 2,59E+00  | 1,07E-01 | 4,01E-01 | Zfp746        | 1,09 | No  |
| ENSMUSG00000057696 | -3,68E-01 | 3,592287463  | 1,45E+01  | 1,43E-04 | 3,26E-03 | Rpl30-ps1     | 0,77 | Yes |
| ENSMUSG00000057706 | -2,16E-01 | 4,340681735  | 6,73E+00  | 9,49E-03 | 8,98E-02 | Mex3b         | 0,86 | No  |
| ENSMUSG00000057716 | -3,83E-02 | -3,107651936 | -7,91E-11 | 1,00E+00 | 1,00E+00 | Tmem178b      | 0,97 | No  |
| ENSMUSG00000057722 | 4,30E-01  | 4,361895554  | 2,62E+01  | 3,12E-07 | 1,56E-05 | Lepr          | 1,35 | Yes |
| ENSMUSG00000057726 | -2,63E-02 | -3,033653157 | 2,33E-04  | 9,88E-01 | 1,00E+00 | Serpib9g      | 0,98 | No  |
| ENSMUSG00000057729 | -1,00E+00 | -0,871746024 | 5,63E+00  | 1,77E-02 | 1,39E-01 | Prtn3         | 0,50 | No  |
| ENSMUSG00000057738 | -1,45E-02 | 8,714313116  | 6,40E-02  | 8,00E-01 | 9,61E-01 | Sptan1        | 0,99 | No  |
| ENSMUSG00000057751 | -1,87E+00 | -3,03364178  | 1,41E+00  | 2,36E-01 | 5,50E-01 | Megf6         | 0,27 | No  |
| ENSMUSG00000057762 | 1,58E-01  | 7,347596081  | 7,00E+00  | 8,14E-03 | 8,00E-02 | Gm6169        | 1,12 | No  |
| ENSMUSG00000057766 | 3,22E-01  | -2,600712337 | 1,06E-01  | 7,45E-01 | 9,29E-01 | Ankrd29       | 1,25 | No  |
| ENSMUSG00000057777 | -7,02E-01 | -2,800981932 | 1,97E-01  | 6,57E-01 | 8,80E-01 | Mab21l2       | 0,61 | No  |
| ENSMUSG00000057778 | -7,16E-02 | 2,931679614  | 4,03E-01  | 5,26E-01 | 8,03E-01 | Cyb5d2        | 0,95 | No  |
| ENSMUSG00000057788 | 4,14E-02  | 5,086012499  | 3,19E-01  | 5,72E-01 | 8,32E-01 | Ddx49         | 1,03 | No  |
| ENSMUSG00000057789 | 5,98E-02  | 7,254920443  | 9,97E-01  | 3,18E-01 | 6,19E-01 | Bak1          | 1,04 | No  |
| ENSMUSG00000057802 | 9,01E-03  | -3,107646452 | -5,16E-10 | 1,00E+00 | 1,00E+00 | Gm10030       | 1,01 | No  |
| ENSMUSG00000057817 | 2,62E+00  | -2,963288024 | 2,65E+00  | 1,03E-01 | 3,95E-01 | Olf1446       | 6,14 | No  |
| ENSMUSG00000057818 | 1,87E+00  | -3,03364371  | 1,36E+00  | 2,43E-01 | 5,50E-01 | 1600029O15Rik | 3,66 | No  |
| ENSMUSG00000057835 | -1,21E-01 | 1,783922989  | 5,82E-01  | 4,46E-01 | 7,36E-01 | Zfp119a       | 0,92 | No  |
| ENSMUSG00000057841 | -2,26E-01 | 6,850578285  | 1,37E+01  | 2,19E-04 | 4,69E-03 | Rpl32         | 0,85 | Yes |
| ENSMUSG00000057842 | 2,16E-01  | 2,570900053  | 2,88E+00  | 8,95E-02 | 3,79E-01 | Zfp595        | 1,16 | No  |
| ENSMUSG00000057858 | 8,88E-02  | 3,012948987  | 6,02E-01  | 4,38E-01 | 7,30E-01 | Fam204a       | 1,06 | No  |
| ENSMUSG00000057863 | -2,12E-01 | 3,422274933  | 4,33E+00  | 3,75E-02 | 2,30E-01 | Rpl36         | 0,86 | No  |
| ENSMUSG00000057880 | -3,24E-01 | -2,268089998 | 1,57E-01  | 6,92E-01 | 9,00E-01 | Abat          | 0,80 | No  |
| ENSMUSG00000057886 | 5,95E-02  | 4,539822513  | 5,58E-01  | 4,55E-01 | 7,45E-01 | Cbx3-ps6      | 1,04 | No  |
| ENSMUSG00000057894 | -1,06E-01 | 2,883334096  | 8,97E-01  | 3,44E-01 | 6,44E-01 | Zfp329        | 0,93 | No  |
| ENSMUSG00000057895 | 1,36E-01  | 1,316818549  | 5,40E-01  | 4,62E-01 | 7,51E-01 | Zfp105        | 1,10 | No  |
| ENSMUSG00000057897 | -7,79E-01 | -0,378124734 | 5,74E+00  | 1,65E-02 | 1,34E-01 | Camk2b        | 0,58 | No  |
| ENSMUSG00000057899 | -7,08E-02 | -2,49758507  | 6,95E-03  | 9,34E-01 | 1,00E+00 | Adgrf2        | 0,95 | No  |
| ENSMUSG00000057914 | 9,10E-02  | 0,171827032  | 1,03E-01  | 7,48E-01 | 9,30E-01 | Cacnb2        | 1,07 | No  |
| ENSMUSG00000057933 | 3,14E-02  | -3,107617333 | -7,69E-10 | 1,00E+00 | 1,00E+00 | Gsta2         | 1,02 | No  |
| ENSMUSG00000057945 | -4,26E-01 | -2,929298692 | 1,13E-01  | 7,37E-01 | 9,25E-01 | Gm17136       | 0,74 | No  |

|                    |           |              |          |          |          |               |       |      |     |
|--------------------|-----------|--------------|----------|----------|----------|---------------|-------|------|-----|
| ENSMUSG00000057948 | -1,96E-01 | 5,654982586  | 8,41E+00 | 3,73E-03 | 4,48E-02 | Unc13d        |       | 0,87 | Yes |
| ENSMUSG00000057963 | 2,96E-02  | 6,169889149  | 2,10E-01 | 6,47E-01 | 8,74E-01 | Itpk1         |       | 1,02 | No  |
| ENSMUSG00000057967 | -8,11E-02 | -2,355510369 | 5,89E-03 | 9,39E-01 | 1,00E+00 | Fgf18         |       | 0,95 | No  |
| ENSMUSG00000057969 | 1,54E+00  | -1,655058537 | 5,51E+00 | 1,89E-02 | 1,46E-01 | Sema3b        |       | 2,91 | No  |
| ENSMUSG00000057982 | -1,32E-01 | 4,243266161  | 2,50E+00 | 1,14E-01 | 4,17E-01 | Zfp809        |       | 0,91 | No  |
| ENSMUSG00000057990 | -3,62E-01 | 3,479290323  | 1,33E+01 | 2,66E-04 | 5,49E-03 | E030024N20Rik |       | 0,78 | Yes |
| ENSMUSG00000058006 | 2,06E-01  | 5,867176891  | 9,53E+00 | 2,02E-03 | 2,82E-02 | Mdn1          |       | 1,15 | Yes |
| ENSMUSG00000058013 | 1,35E-01  | 7,327852465  | 5,08E+00 | 2,42E-02 | 1,71E-01 |               | 40787 | 1,10 | No  |
| ENSMUSG00000058019 | 1,85E+00  | -3,107657832 | 1,35E+00 | 2,46E-01 | 5,50E-01 | Ces5a         |       | 3,61 | No  |
| ENSMUSG00000058022 | -9,32E-01 | 0,144252859  | 1,15E+01 | 6,78E-04 | 1,17E-02 | Adtrp         |       | 0,52 | Yes |
| ENSMUSG00000058046 | 3,16E-01  | 2,023585807  | 4,39E+00 | 3,61E-02 | 2,25E-01 | 4933430I17Rik |       | 1,24 | No  |
| ENSMUSG00000058050 | -2,81E-01 | 2,649237747  | 5,16E+00 | 2,31E-02 | 1,66E-01 | Gm9234        |       | 0,82 | No  |
| ENSMUSG00000058052 | -1,94E+00 | -3,107619243 | 1,50E+00 | 2,21E-01 | 5,50E-01 | Defb35        |       | 0,26 | No  |
| ENSMUSG00000058056 | -3,62E-01 | 5,63883826   | 2,88E+01 | 8,16E-08 | 4,65E-06 | Palld         |       | 0,78 | Yes |
| ENSMUSG00000058063 | 1,81E+00  | -3,10765737  | 1,28E+00 | 2,58E-01 | 5,50E-01 | Trim31        |       | 3,49 | No  |
| ENSMUSG00000058064 | -3,02E-01 | 6,226616429  | 2,21E+01 | 2,58E-06 | 1,01E-04 | Gm10036       |       | 0,81 | Yes |
| ENSMUSG00000058070 | 1,61E+00  | -2,522656062 | 1,77E+00 | 1,83E-01 | 5,46E-01 | Eml1          |       | 3,05 | No  |
| ENSMUSG00000058073 | -2,52E-01 | 2,80687039   | 4,49E+00 | 3,41E-02 | 2,18E-01 | Gm11189       |       | 0,84 | No  |
| ENSMUSG00000058076 | 9,11E-02  | 6,39969266   | 2,07E+00 | 1,50E-01 | 4,91E-01 | Sdhc          |       | 1,07 | No  |
| ENSMUSG00000058093 | 9,03E-02  | 3,510784469  | 8,27E-01 | 3,63E-01 | 6,64E-01 | Zfp729b       |       | 1,06 | No  |
| ENSMUSG00000058099 | 1,15E-01  | 8,442932589  | 3,98E+00 | 4,61E-02 | 2,57E-01 | Nfam1         |       | 1,08 | No  |
| ENSMUSG00000058101 | 8,12E-01  | -0,980688368 | 3,30E+00 | 6,92E-02 | 3,31E-01 | 1700084J12Rik |       | 1,76 | No  |
| ENSMUSG00000058114 | 1,81E+00  | -3,10765737  | 1,28E+00 | 2,58E-01 | 5,50E-01 | Olf127        |       | 3,49 | No  |
| ENSMUSG00000058126 | -4,56E-03 | 8,286825385  | 6,23E-03 | 9,37E-01 | 1,00E+00 | Tpm3-rs7      |       | 1,00 | No  |
| ENSMUSG00000058135 | -7,53E-02 | 5,77151828   | 1,26E+00 | 2,61E-01 | 5,55E-01 | Gstm1         |       | 0,95 | No  |
| ENSMUSG00000058152 | 3,66E-01  | 1,56915882   | 4,67E+00 | 3,06E-02 | 2,02E-01 | Chsy3         |       | 1,29 | No  |
| ENSMUSG00000058153 | 1,20E+00  | -2,226341615 | 2,45E+00 | 1,18E-01 | 4,26E-01 | Sez6l         |       | 2,30 | No  |
| ENSMUSG00000058159 | -1,27E+00 | -3,146104694 | 7,49E-01 | 3,87E-01 | 6,87E-01 | T2            |       | 0,42 | No  |
| ENSMUSG00000058163 | 2,19E-01  | 4,412562971  | 7,30E+00 | 6,90E-03 | 7,10E-02 | Gm5431        |       | 1,16 | No  |
| ENSMUSG00000058173 | 1,60E-01  | 2,259088355  | 1,28E+00 | 2,57E-01 | 5,50E-01 | Smco4         |       | 1,12 | No  |
| ENSMUSG00000058174 | -1,96E-01 | 7,68949154   | 1,11E+01 | 8,52E-04 | 1,42E-02 | Gm5148        |       | 0,87 | Yes |
| ENSMUSG00000058183 | -1,26E+00 | -1,726045096 | 3,50E+00 | 6,13E-02 | 3,08E-01 | Mmel1         |       | 0,42 | No  |

|                    |           |              |          |          |          |           |      |     |
|--------------------|-----------|--------------|----------|----------|----------|-----------|------|-----|
| ENSMUSG00000058186 | -1,24E+00 | -2,655103303 | 1,47E+00 | 2,25E-01 | 5,50E-01 | Zfp980    | 0,42 | No  |
| ENSMUSG00000058192 | 1,38E-01  | 2,765834824  | 1,42E+00 | 2,34E-01 | 5,50E-01 | Zfp846    | 1,10 | No  |
| ENSMUSG00000058216 | -4,13E-02 | -3,033659495 | 7,08E-04 | 9,79E-01 | 1,00E+00 | Gstp3     | 0,97 | No  |
| ENSMUSG00000058230 | -1,36E-01 | 4,634987589  | 3,01E+00 | 8,28E-02 | 3,70E-01 | Arhgap35  | 0,91 | No  |
| ENSMUSG00000058239 | 8,58E-02  | 6,318232711  | 1,81E+00 | 1,79E-01 | 5,39E-01 | Usf2      | 1,06 | No  |
| ENSMUSG00000058240 | 3,80E-02  | 3,979084034  | 1,81E-01 | 6,71E-01 | 8,88E-01 | Cryz11    | 1,03 | No  |
| ENSMUSG00000058246 | 4,99E-02  | -1,627658342 | 7,26E-03 | 9,32E-01 | 1,00E+00 | Gm10037   | 1,04 | No  |
| ENSMUSG00000058248 | -2,24E+00 | -2,548215921 | 4,09E+00 | 4,32E-02 | 2,47E-01 | Kcnh1     | 0,21 | No  |
| ENSMUSG00000058250 | 2,65E+00  | -2,963270355 | 2,72E+00 | 9,93E-02 | 3,92E-01 | Tas2r138  | 6,29 | No  |
| ENSMUSG00000058258 | -1,47E-04 | 5,875575663  | 5,00E-06 | 9,98E-01 | 1,00E+00 | Idi1      | 1,00 | No  |
| ENSMUSG00000058267 | 9,67E-02  | 4,677383784  | 1,53E+00 | 2,16E-01 | 5,50E-01 | Mrps14    | 1,07 | No  |
| ENSMUSG00000058281 | -7,88E-02 | -2,832049512 | 2,63E-03 | 9,59E-01 | 1,00E+00 | Gm10038   | 0,95 | No  |
| ENSMUSG00000058290 | 2,39E-01  | 5,448181573  | 1,18E+01 | 5,91E-04 | 1,05E-02 | Espl1     | 1,18 | Yes |
| ENSMUSG00000058291 | -8,33E-02 | 4,212902225  | 9,68E-01 | 3,25E-01 | 6,26E-01 | Zfp68     | 0,94 | No  |
| ENSMUSG00000058297 | -5,48E-01 | -1,998055333 | 6,55E-01 | 4,18E-01 | 7,13E-01 | Spock2    | 0,68 | No  |
| ENSMUSG00000058298 | -7,25E-02 | 4,532319281  | 8,19E-01 | 3,65E-01 | 6,66E-01 | Mcm9      | 0,95 | No  |
| ENSMUSG00000058301 | 1,12E-01  | 6,292838244  | 3,10E+00 | 7,84E-02 | 3,58E-01 | Upf1      | 1,08 | No  |
| ENSMUSG00000058317 | -1,12E-01 | 2,100286275  | 5,85E-01 | 4,44E-01 | 7,36E-01 | Ube2e2    | 0,93 | No  |
| ENSMUSG00000058318 | -3,46E-01 | 5,225880795  | 2,34E+01 | 1,34E-06 | 5,76E-05 | Phf21a    | 0,79 | Yes |
| ENSMUSG00000058325 | 3,82E-03  | 5,614838049  | 3,11E-03 | 9,56E-01 | 1,00E+00 | Dock1     | 1,00 | No  |
| ENSMUSG00000058331 | -7,00E-02 | 1,107082782  | 1,27E-01 | 7,21E-01 | 9,16E-01 | Zfp85     | 0,95 | No  |
| ENSMUSG00000058351 | 1,27E-01  | 2,786991865  | 1,12E+00 | 2,90E-01 | 5,86E-01 | Smim4     | 1,09 | No  |
| ENSMUSG00000058355 | 7,85E-02  | 6,546785886  | 1,58E+00 | 2,09E-01 | 5,50E-01 | Abce1     | 1,06 | No  |
| ENSMUSG00000058357 | -1,13E+00 | -2,497614886 | 7,53E-01 | 3,85E-01 | 6,87E-01 | Gm6612    | 0,46 | No  |
| ENSMUSG00000058360 | -1,33E+00 | -2,831968119 | 1,11E+00 | 2,92E-01 | 5,88E-01 | Gm10040   | 0,40 | No  |
| ENSMUSG00000058385 | -1,35E-01 | 3,526004137  | 1,86E+00 | 1,73E-01 | 5,30E-01 | Hist1h2bg | 0,91 | No  |
| ENSMUSG00000058388 | 8,40E-02  | 4,467047521  | 1,08E+00 | 2,98E-01 | 5,94E-01 | Phtf1     | 1,06 | No  |
| ENSMUSG00000058392 | 1,35E-01  | 4,474557262  | 2,77E+00 | 9,58E-02 | 3,86E-01 | Rrp1b     | 1,10 | No  |
| ENSMUSG00000058396 | 1,02E-01  | -1,107631585 | 5,04E-02 | 8,22E-01 | 9,72E-01 | Gpr182    | 1,07 | No  |
| ENSMUSG00000058400 | -8,86E-02 | -2,963249454 | 3,57E-03 | 9,52E-01 | 1,00E+00 | Qrfpr     | 0,94 | No  |
| ENSMUSG00000058402 | 1,25E-01  | 1,010529429  | 3,81E-01 | 5,37E-01 | 8,09E-01 | Zfp420    | 1,09 | No  |
| ENSMUSG00000058407 | -2,44E-02 | 5,630834705  | 1,28E-01 | 7,20E-01 | 9,16E-01 | Txndc9    | 0,98 | No  |

|                    |           |              |           |          |          |            |      |     |
|--------------------|-----------|--------------|-----------|----------|----------|------------|------|-----|
| ENSMUSG00000058420 | 2,84E+00  | -2,355705877 | 7,98E+00  | 4,74E-03 | 5,37E-02 | Syt17      | 7,16 | No  |
| ENSMUSG00000058427 | -2,23E-01 | 6,320636055  | 1,19E+01  | 5,69E-04 | 1,02E-02 | Cxcl2      | 0,86 | Yes |
| ENSMUSG00000058430 | 9,01E-03  | -3,107646452 | -5,16E-10 | 1,00E+00 | 1,00E+00 | Rpl27a-ps2 | 1,01 | No  |
| ENSMUSG00000058435 | -8,51E-01 | -2,896137967 | 3,97E-01  | 5,28E-01 | 8,04E-01 | Btnl4      | 0,55 | No  |
| ENSMUSG00000058440 | 2,30E-01  | 4,77817411   | 9,01E+00  | 2,68E-03 | 3,51E-02 | Nrf1       | 1,17 | Yes |
| ENSMUSG00000058441 | -3,77E-01 | -2,497572405 | 1,79E-01  | 6,72E-01 | 8,89E-01 | Panx2      | 0,77 | No  |
| ENSMUSG00000058443 | -2,31E-01 | 8,110247575  | 1,59E+01  | 6,64E-05 | 1,72E-03 | Rpl10-ps3  | 0,85 | Yes |
| ENSMUSG00000058444 | -3,40E-02 | 3,870985047  | 1,39E-01  | 7,09E-01 | 9,09E-01 | Map2k5     | 0,98 | No  |
| ENSMUSG00000058446 | 3,04E-02  | 8,34714363   | 2,79E-01  | 5,98E-01 | 8,45E-01 | Znrf2      | 1,02 | No  |
| ENSMUSG00000058447 | -8,97E-03 | 0,486641207  | 1,51E-03  | 9,69E-01 | 1,00E+00 | Gm26920    | 0,99 | No  |
| ENSMUSG00000058454 | 2,86E-01  | 5,560312303  | 1,73E+01  | 3,22E-05 | 9,32E-04 | Dhcr7      | 1,22 | Yes |
| ENSMUSG00000058463 | -1,87E+00 | -3,033619006 | 1,41E+00  | 2,36E-01 | 5,50E-01 | Gm5471     | 0,27 | No  |
| ENSMUSG00000058470 | 4,62E-01  | -1,740802206 | 5,89E-01  | 4,43E-01 | 7,35E-01 | Gm8369     | 1,38 | No  |
| ENSMUSG00000058486 | 1,67E-02  | 6,866264813  | 7,42E-02  | 7,85E-01 | 9,52E-01 | Wdr91      | 1,01 | No  |
| ENSMUSG00000058492 | -7,14E-02 | 5,856890726  | 1,16E+00  | 2,82E-01 | 5,79E-01 | Scp2-ps2   | 0,95 | No  |
| ENSMUSG00000058498 | -1,02E+00 | -1,278586247 | 3,97E+00  | 4,63E-02 | 2,57E-01 | Rnf207     | 0,49 | No  |
| ENSMUSG00000058503 | -1,71E-01 | 3,873501946  | 3,61E+00  | 5,74E-02 | 2,95E-01 | Fam133b    | 0,89 | No  |
| ENSMUSG00000058537 | -1,89E+00 | -3,1076441   | 1,42E+00  | 2,33E-01 | 5,50E-01 | AW822073   | 0,27 | No  |
| ENSMUSG00000058542 | 2,13E-02  | 9,13447097   | 1,40E-01  | 7,08E-01 | 9,09E-01 | Gm15590    | 1,01 | No  |
| ENSMUSG00000058546 | -1,80E-01 | 4,532690094  | 5,11E+00  | 2,38E-02 | 1,69E-01 | Rpl23a     | 0,88 | No  |
| ENSMUSG00000058558 | -1,36E-01 | 5,992193649  | 4,35E+00  | 3,70E-02 | 2,28E-01 | Rpl5       | 0,91 | No  |
| ENSMUSG00000058567 | -2,49E-01 | 0,385670182  | 8,74E-01  | 3,50E-01 | 6,51E-01 | Gm2531     | 0,84 | No  |
| ENSMUSG00000058569 | 1,49E-02  | 7,087458191  | 6,07E-02  | 8,05E-01 | 9,63E-01 | Tmed9      | 1,01 | No  |
| ENSMUSG00000058571 | 2,07E-01  | -2,355593794 | 5,38E-02  | 8,17E-01 | 9,69E-01 | Gpc6       | 1,15 | No  |
| ENSMUSG00000058579 | 8,68E-02  | 0,516793528  | 1,25E-01  | 7,24E-01 | 9,17E-01 | Cela2a     | 1,06 | No  |
| ENSMUSG00000058581 | -1,14E-01 | 4,964055783  | 2,34E+00  | 1,26E-01 | 4,45E-01 | Gm5801     | 0,92 | No  |
| ENSMUSG00000058586 | 1,08E-03  | 4,727559938  | 1,95E-04  | 9,89E-01 | 1,00E+00 | Serhl      | 1,00 | No  |
| ENSMUSG00000058587 | -4,35E-02 | 7,314753543  | 5,31E-01  | 4,66E-01 | 7,54E-01 | Tmod3      | 0,97 | No  |
| ENSMUSG00000058588 | -1,88E+00 | -2,655099755 | 2,56E+00  | 1,09E-01 | 4,05E-01 | Vmn1r21    | 0,27 | No  |
| ENSMUSG00000058589 | -2,65E+00 | -2,963225595 | 2,80E+00  | 9,41E-02 | 3,84E-01 | Anks1b     | 0,16 | No  |
| ENSMUSG00000058594 | -2,49E-02 | 6,549422023  | 1,60E-01  | 6,89E-01 | 8,99E-01 | Fbxo18     | 0,98 | No  |
| ENSMUSG00000058600 | -1,14E-01 | 5,261978935  | 2,56E+00  | 1,09E-01 | 4,06E-01 | Rpl30      | 0,92 | No  |

|                    |           |              |          |          |          |               |      |     |
|--------------------|-----------|--------------|----------|----------|----------|---------------|------|-----|
| ENSMUSG00000058603 | -1,27E-01 | 8,299617447  | 4,82E+00 | 2,81E-02 | 1,89E-01 | Rpl28-ps1     | 0,92 | No  |
| ENSMUSG00000058620 | 2,59E+00  | -2,832063622 | 2,61E+00 | 1,06E-01 | 3,98E-01 | Adra2b        | 6,04 | No  |
| ENSMUSG00000058622 | 7,66E-01  | -2,963249872 | 3,22E-01 | 5,70E-01 | 8,31E-01 | Gm5265        | 1,70 | No  |
| ENSMUSG00000058624 | -4,09E-02 | 7,763643209  | 4,84E-01 | 4,87E-01 | 7,74E-01 | Gda           | 0,97 | No  |
| ENSMUSG00000058625 | 5,73E-02  | 6,688466684  | 8,56E-01 | 3,55E-01 | 6,56E-01 | Gm17383       | 1,04 | No  |
| ENSMUSG00000058626 | 4,10E-02  | 0,062484703  | 2,05E-02 | 8,86E-01 | 1,00E+00 | Capn11        | 1,03 | No  |
| ENSMUSG00000058638 | -1,63E-02 | 5,20678086   | 5,18E-02 | 8,20E-01 | 9,71E-01 | Zfp110        | 0,99 | No  |
| ENSMUSG00000058655 | -6,90E-02 | 8,305306055  | 1,43E+00 | 2,32E-01 | 5,50E-01 | Eif4b         | 0,95 | No  |
| ENSMUSG00000058656 | -6,85E-02 | -2,896124416 | 3,23E-03 | 9,55E-01 | 1,00E+00 | Samd12        | 0,95 | No  |
| ENSMUSG00000058669 | 1,84E+00  | -3,033649193 | 1,33E+00 | 2,49E-01 | 5,50E-01 | Nkx2-9        | 3,58 | No  |
| ENSMUSG00000058672 | -1,31E-01 | 6,744920145  | 4,49E+00 | 3,41E-02 | 2,17E-01 | Tubb2a        | 0,91 | No  |
| ENSMUSG00000058690 | -5,10E-01 | 6,391331166  | 6,53E+01 | 6,33E-16 | 1,06E-13 | Ccser2        | 0,70 | Yes |
| ENSMUSG00000058700 | 1,11E-02  | -1,24712204  | 5,07E-04 | 9,82E-01 | 1,00E+00 | Rpl21-ps12    | 1,01 | No  |
| ENSMUSG00000058704 | 5,71E-02  | 4,631853687  | 5,19E-01 | 4,71E-01 | 7,60E-01 | Memo1         | 1,04 | No  |
| ENSMUSG00000058706 | 8,22E-02  | 4,96255991   | 1,24E+00 | 2,65E-01 | 5,60E-01 | 0610030E20Rik | 1,06 | No  |
| ENSMUSG00000058709 | 1,17E-01  | 5,699594487  | 2,99E+00 | 8,38E-02 | 3,71E-01 | Egln2         | 1,08 | No  |
| ENSMUSG00000058715 | 1,43E-01  | 8,486607599  | 6,22E+00 | 1,26E-02 | 1,11E-01 | Fcer1g        | 1,10 | No  |
| ENSMUSG00000058717 | -1,94E+00 | -3,107619243 | 1,50E+00 | 2,21E-01 | 5,50E-01 | Gm4763        | 0,26 | No  |
| ENSMUSG00000058728 | -4,52E-01 | 1,432541667  | 6,50E+00 | 1,08E-02 | 9,89E-02 | Cd300c        | 0,73 | No  |
| ENSMUSG00000058729 | 1,72E-01  | 3,418316267  | 2,84E+00 | 9,17E-02 | 3,82E-01 | Lin9          | 1,13 | No  |
| ENSMUSG00000058740 | -1,03E+00 | -0,14596827  | 1,06E+01 | 1,10E-03 | 1,75E-02 | Kcnt1         | 0,49 | Yes |
| ENSMUSG00000058741 | 1,24E+00  | -2,832043562 | 9,59E-01 | 3,28E-01 | 6,28E-01 | Prr19         | 2,37 | No  |
| ENSMUSG00000058743 | 3,83E-01  | -2,185605758 | 2,35E-01 | 6,28E-01 | 8,61E-01 | Kcnj14        | 1,30 | No  |
| ENSMUSG00000058745 | -3,24E-03 | 2,500999357  | 6,01E-04 | 9,80E-01 | 1,00E+00 | Gm9174        | 1,00 | No  |
| ENSMUSG00000058748 | 5,15E-02  | 3,073631252  | 2,23E-01 | 6,37E-01 | 8,68E-01 | Zfp958        | 1,04 | No  |
| ENSMUSG00000058755 | 1,41E-01  | 5,905960355  | 4,55E+00 | 3,30E-02 | 2,13E-01 | Osm           | 1,10 | No  |
| ENSMUSG00000058756 | 1,35E-01  | 3,043826217  | 1,43E+00 | 2,32E-01 | 5,50E-01 | Thra          | 1,10 | No  |
| ENSMUSG00000058761 | 4,98E-02  | 6,239799458  | 6,10E-01 | 4,35E-01 | 7,28E-01 | Rnf169        | 1,04 | No  |
| ENSMUSG00000058773 | 3,53E-01  | 0,432112722  | 2,03E+00 | 1,54E-01 | 4,98E-01 | Hist1h1b      | 1,28 | No  |
| ENSMUSG00000058793 | 2,70E-02  | 8,450677663  | 2,20E-01 | 6,39E-01 | 8,69E-01 | Cds2          | 1,02 | No  |
| ENSMUSG00000058794 | 3,10E-01  | 3,876426762  | 1,14E+01 | 7,28E-04 | 1,25E-02 | Nfe2          | 1,24 | Yes |
| ENSMUSG00000058799 | -2,90E-01 | 7,265104516  | 2,35E+01 | 1,26E-06 | 5,45E-05 | Nap1l1        | 0,82 | Yes |

|                    |           |              |          |          |          |               |      |     |
|--------------------|-----------|--------------|----------|----------|----------|---------------|------|-----|
| ENSMUSG00000058809 | 8,42E-02  | 6,96359059   | 1,91E+00 | 1,67E-01 | 5,20E-01 | Hspd1-ps3     | 1,06 | No  |
| ENSMUSG00000058812 | -5,01E-02 | 1,102089682  | 6,11E-02 | 8,05E-01 | 9,63E-01 | 0610039K10Rik | 0,97 | No  |
| ENSMUSG00000058816 | 1,10E-01  | 1,244476161  | 3,25E-01 | 5,69E-01 | 8,30E-01 | Ppp1r2-ps3    | 1,08 | No  |
| ENSMUSG00000058818 | -3,68E-02 | 8,093293048  | 4,02E-01 | 5,26E-01 | 8,03E-01 | Pirb          | 0,97 | No  |
| ENSMUSG00000058831 | 3,93E-01  | -2,929263107 | 7,75E-02 | 7,81E-01 | 9,49E-01 | Opn1sw        | 1,31 | No  |
| ENSMUSG00000058833 | 6,62E-02  | 4,110469929  | 5,79E-01 | 4,47E-01 | 7,37E-01 | 2810428I15Rik | 1,05 | No  |
| ENSMUSG00000058835 | -7,91E-02 | 7,530311565  | 1,79E+00 | 1,81E-01 | 5,43E-01 | Abi1          | 0,95 | No  |
| ENSMUSG00000058838 | -1,43E-01 | 7,285921763  | 5,70E+00 | 1,69E-02 | 1,36E-01 | Rps27a-ps2    | 0,91 | No  |
| ENSMUSG00000058869 | -1,06E-01 | -3,033634182 | 5,86E-03 | 9,39E-01 | 1,00E+00 | Gm4832        | 0,93 | No  |
| ENSMUSG00000058873 | 1,51E-01  | 2,051524082  | 1,01E+00 | 3,16E-01 | 6,16E-01 | Gm5582        | 1,11 | No  |
| ENSMUSG00000058881 | 7,58E-02  | 6,639319608  | 1,49E+00 | 2,22E-01 | 5,50E-01 | Zfp516        | 1,05 | No  |
| ENSMUSG00000058883 | 7,64E-01  | -1,076343143 | 3,06E+00 | 8,05E-02 | 3,64E-01 | Zfp708        | 1,70 | No  |
| ENSMUSG00000058886 | 2,71E-01  | 4,121686376  | 9,82E+00 | 1,72E-03 | 2,48E-02 | Deaf1         | 1,21 | Yes |
| ENSMUSG00000058897 | -1,95E+00 | -3,033628749 | 1,50E+00 | 2,21E-01 | 5,50E-01 | Col25a1       | 0,26 | No  |
| ENSMUSG00000058900 | 9,21E-02  | 2,342694242  | 4,77E-01 | 4,90E-01 | 7,76E-01 | Rsl1          | 1,07 | No  |
| ENSMUSG00000058905 | -2,13E-01 | 7,046135796  | 1,24E+01 | 4,24E-04 | 8,00E-03 | Gm10051       | 0,86 | Yes |
| ENSMUSG00000058914 | 4,70E-01  | -2,770578322 | 1,73E-01 | 6,78E-01 | 8,92E-01 | C1qtnf3       | 1,38 | No  |
| ENSMUSG00000058921 | -1,92E+00 | -2,963268013 | 1,46E+00 | 2,27E-01 | 5,50E-01 | Slc10a5       | 0,26 | No  |
| ENSMUSG00000058922 | 1,17E-02  | 7,773555812  | 3,96E-02 | 8,42E-01 | 9,85E-01 | Gm10052       | 1,01 | No  |
| ENSMUSG00000058927 | -8,62E-02 | 5,968418863  | 1,72E+00 | 1,90E-01 | 5,50E-01 | Gm10053       | 0,94 | No  |
| ENSMUSG00000058934 | -3,21E-01 | -0,997902971 | 5,76E-01 | 4,48E-01 | 7,38E-01 | Igf1os        | 0,80 | No  |
| ENSMUSG00000058935 | -3,24E-02 | -2,401332317 | 1,23E-03 | 9,72E-01 | 1,00E+00 | Tex48         | 0,98 | No  |
| ENSMUSG00000058952 | -3,19E+00 | -2,896088812 | 4,27E+00 | 3,87E-02 | 2,33E-01 | Cfi           | 0,11 | No  |
| ENSMUSG00000058966 | 1,36E-01  | 5,33341584   | 3,68E+00 | 5,51E-02 | 2,88E-01 | Fam57b        | 1,10 | No  |
| ENSMUSG00000058975 | -2,66E+00 | -2,896122337 | 2,83E+00 | 9,26E-02 | 3,83E-01 | Kcnc1         | 0,16 | No  |
| ENSMUSG00000058976 | -5,25E-01 | -2,226322912 | 4,42E-01 | 5,06E-01 | 7,91E-01 | Usp17lc       | 0,69 | No  |
| ENSMUSG00000058979 | 1,87E-01  | 3,869989645  | 4,22E+00 | 4,00E-02 | 2,37E-01 | Hdhd5         | 1,14 | No  |
| ENSMUSG00000058997 | 1,02E-01  | 5,05629919   | 1,92E+00 | 1,65E-01 | 5,18E-01 | Vwa8          | 1,07 | No  |
| ENSMUSG00000059005 | 4,27E-02  | 6,330955436  | 4,50E-01 | 5,02E-01 | 7,87E-01 | Hnrnpa3       | 1,03 | No  |
| ENSMUSG00000059013 | 3,14E-01  | 4,378153859  | 1,48E+01 | 1,19E-04 | 2,81E-03 | Sh2d3c        | 1,24 | Yes |
| ENSMUSG00000059022 | -5,08E-01 | 5,858309314  | 5,94E+01 | 1,28E-14 | 1,88E-12 | Kcp           | 0,70 | Yes |
| ENSMUSG00000059027 | -5,13E-01 | -0,378128443 | 2,32E+00 | 1,28E-01 | 4,49E-01 | 9630013D21Rik | 0,70 | No  |

|                    |           |              |           |          |          |            |       |      |     |
|--------------------|-----------|--------------|-----------|----------|----------|------------|-------|------|-----|
| ENSMUSG00000059031 | -2,09E-01 | 2,166422254  | 2,19E+00  | 1,39E-01 | 4,71E-01 | Olfr482    |       | 0,87 | No  |
| ENSMUSG00000059033 | -1,73E-01 | 1,210951938  | 7,80E-01  | 3,77E-01 | 6,78E-01 | Rpl18a-ps1 |       | 0,89 | No  |
| ENSMUSG00000059040 | 1,80E-01  | 9,24440717   | 1,00E+01  | 1,55E-03 | 2,29E-02 | Eno1b      |       | 1,13 | Yes |
| ENSMUSG00000059042 | 6,18E-01  | 4,49360339   | 5,57E+01  | 8,60E-14 | 1,20E-11 | Klk1b9     |       | 1,53 | Yes |
| ENSMUSG00000059049 | -2,80E-01 | -2,35556794  | 1,36E-01  | 7,13E-01 | 9,11E-01 | Frem1      |       | 0,82 | No  |
| ENSMUSG00000059058 | -1,43E-01 | 5,899395912  | 4,70E+00  | 3,01E-02 | 1,99E-01 | Tma7-ps    |       | 0,91 | No  |
| ENSMUSG00000059060 | -1,97E-01 | 0,844047054  | 8,16E-01  | 3,66E-01 | 6,67E-01 | Rad51b     |       | 0,87 | No  |
| ENSMUSG00000059064 | -7,60E-01 | -2,185570254 | 1,18E+00  | 2,78E-01 | 5,74E-01 | Gm10059    |       | 0,59 | No  |
| ENSMUSG00000059070 | -1,24E-01 | 5,715209962  | 3,39E+00  | 6,55E-02 | 3,21E-01 | Rpl18      |       | 0,92 | No  |
| ENSMUSG00000059087 | 2,56E+00  | -2,896188915 | 2,56E+00  | 1,10E-01 | 4,06E-01 | Olfr698    |       | 5,91 | No  |
| ENSMUSG00000059089 | -8,67E-01 | 2,503723727  | 4,15E+01  | 1,20E-10 | 1,12E-08 | Fcgr4      |       | 0,55 | Yes |
| ENSMUSG00000059106 | -1,89E+00 | -3,1076441   | 1,42E+00  | 2,33E-01 | 5,50E-01 | Olfr961    |       | 0,27 | No  |
| ENSMUSG00000059108 | -1,79E+00 | 2,032521522  | 1,32E+02  | 1,81E-30 | 1,09E-27 | lfitm6     |       | 0,29 | Yes |
| ENSMUSG00000059119 | 5,64E-02  | 6,446010687  | 8,02E-01  | 3,71E-01 | 6,72E-01 | Nap1l4     |       | 1,04 | No  |
| ENSMUSG00000059134 | -5,25E-02 | -3,033661434 | 4,08E-11  | 1,00E+00 | 1,00E+00 | Olfr814    |       | 0,96 | No  |
| ENSMUSG00000059136 | 9,01E-03  | -3,107646452 | -5,16E-10 | 1,00E+00 | 1,00E+00 | Olfr539    |       | 1,01 | No  |
| ENSMUSG00000059142 | -3,39E-01 | 4,435787404  | 1,80E+01  | 2,26E-05 | 6,92E-04 | Zfp945     |       | 0,79 | Yes |
| ENSMUSG00000059149 | 1,11E-01  | 4,289962813  | 1,73E+00  | 1,88E-01 | 5,50E-01 | Mfsd4a     |       | 1,08 | No  |
| ENSMUSG00000059150 | 7,50E-01  | -1,574291434 | 1,89E+00  | 1,69E-01 | 5,24E-01 | Rpl26-ps4  |       | 1,68 | No  |
| ENSMUSG00000059159 | -1,98E-01 | 5,87182233   | 8,97E+00  | 2,75E-03 | 3,58E-02 | Gm8129     |       | 0,87 | Yes |
| ENSMUSG00000059173 | 9,01E-03  | -3,107646452 | -5,16E-10 | 1,00E+00 | 1,00E+00 | Pde1a      |       | 1,01 | No  |
| ENSMUSG00000059179 | -4,97E-02 | 4,268886065  | 3,41E-01  | 5,60E-01 | 8,22E-01 | Gm8991     |       | 0,97 | No  |
| ENSMUSG00000059182 | 3,54E-02  | 7,188729447  | 3,47E-01  | 5,56E-01 | 8,21E-01 | Skap2      |       | 1,02 | No  |
| ENSMUSG00000059183 | 1,31E-01  | 3,912745652  | 2,13E+00  | 1,44E-01 | 4,80E-01 | Mtfmt      |       | 1,10 | No  |
| ENSMUSG00000059195 | -5,09E-02 | 11,13064523  | 8,29E-01  | 3,63E-01 | 6,64E-01 | Gm12715    |       | 0,97 | No  |
| ENSMUSG00000059208 | 5,31E-02  | 7,636646621  | 8,10E-01  | 3,68E-01 | 6,69E-01 | Hnrnpm     |       | 1,04 | No  |
| ENSMUSG00000059213 | 1,12E+00  | -2,655145496 | 1,18E+00  | 2,77E-01 | 5,73E-01 | Ddn        |       | 2,17 | No  |
| ENSMUSG00000059237 | -1,09E-01 | 3,82340988   | 1,39E+00  | 2,39E-01 | 5,50E-01 | Ppp1r2-ps4 |       | 0,93 | No  |
| ENSMUSG00000059244 | 2,87E-01  | -2,83201524  | 5,07E-02  | 8,22E-01 | 9,72E-01 | Gm10062    |       | 1,22 | No  |
| ENSMUSG00000059248 | 1,71E-01  | 8,765347035  | 8,99E+00  | 2,71E-03 | 3,54E-02 |            | 40057 | 1,13 | Yes |
| ENSMUSG00000059252 | -1,37E-01 | 3,278653619  | 1,71E+00  | 1,90E-01 | 5,50E-01 | Tpt1-ps5   |       | 0,91 | No  |
| ENSMUSG00000059263 | 1,58E-01  | 6,923813132  | 6,72E+00  | 9,53E-03 | 8,99E-02 | Usp47      |       | 1,12 | No  |



|                    |           |              |           |          |          |         |      |     |
|--------------------|-----------|--------------|-----------|----------|----------|---------|------|-----|
| ENSMUSG00000059273 | 7,46E-02  | 6,581975834  | 1,44E+00  | 2,31E-01 | 5,50E-01 | Zc3h4   | 1,05 | No  |
| ENSMUSG00000059277 | 9,46E-03  | 2,530135877  | 5,23E-03  | 9,42E-01 | 1,00E+00 | R74862  | 1,01 | No  |
| ENSMUSG00000059278 | -6,54E-02 | 4,042077516  | 5,48E-01  | 4,59E-01 | 7,48E-01 | Naa38   | 0,96 | No  |
| ENSMUSG00000059279 | -3,83E-02 | -3,107651936 | -7,91E-11 | 1,00E+00 | 1,00E+00 | Olfr224 | 0,97 | No  |
| ENSMUSG00000059288 | 6,00E-02  | 4,219975045  | 4,94E-01  | 4,82E-01 | 7,70E-01 | Cdyl    | 1,04 | No  |
| ENSMUSG00000059291 | -2,51E-01 | 4,634711776  | 1,03E+01  | 1,33E-03 | 2,03E-02 | Rpl11   | 0,84 | Yes |
| ENSMUSG00000059301 | -1,06E-01 | 1,566271629  | 3,68E-01  | 5,44E-01 | 8,13E-01 | Gm5434  | 0,93 | No  |
| ENSMUSG00000059305 | -7,64E-01 | -1,879748081 | 1,19E+00  | 2,75E-01 | 5,71E-01 | Vpreb1  | 0,59 | No  |
| ENSMUSG00000059316 | 2,00E-01  | 5,60953676   | 8,49E+00  | 3,57E-03 | 4,36E-02 | Slc27a4 | 1,15 | Yes |
| ENSMUSG00000059323 | -4,42E-02 | 5,655002393  | 4,28E-01  | 5,13E-01 | 7,95E-01 | Tonsl   | 0,97 | No  |
| ENSMUSG00000059325 | 8,90E-02  | 4,354397912  | 1,15E+00  | 2,84E-01 | 5,81E-01 | Hopx    | 1,06 | No  |
| ENSMUSG00000059326 | 1,65E-01  | 8,739706999  | 8,30E+00  | 3,97E-03 | 4,71E-02 | Csf2ra  | 1,12 | Yes |
| ENSMUSG00000059336 | -4,41E-02 | 1,896938007  | 8,12E-02  | 7,76E-01 | 9,45E-01 | Slc14a1 | 0,97 | No  |
| ENSMUSG00000059343 | 9,04E-02  | 7,24076344   | 2,27E+00  | 1,32E-01 | 4,56E-01 | Aldoat1 | 1,06 | No  |
| ENSMUSG00000059352 | -1,95E+00 | -3,033628749 | 1,50E+00  | 2,21E-01 | 5,50E-01 | Gm10064 | 0,26 | No  |
| ENSMUSG00000059355 | -9,99E-03 | 3,919287421  | 1,21E-02  | 9,12E-01 | 1,00E+00 | Wdr83os | 0,99 | No  |
| ENSMUSG00000059363 | 3,82E-01  | 0,550981906  | 2,62E+00  | 1,06E-01 | 3,98E-01 | Fxn     | 1,30 | No  |
| ENSMUSG00000059395 | 8,50E-02  | -0,669281562 | 4,62E-02  | 8,30E-01 | 9,77E-01 | Nkapl   | 1,06 | No  |
| ENSMUSG00000059397 | -1,87E+00 | -3,107637761 | 1,39E+00  | 2,38E-01 | 5,50E-01 | Olfr54  | 0,27 | No  |
| ENSMUSG00000059406 | 5,83E-01  | -1,998083955 | 7,31E-01  | 3,92E-01 | 6,93E-01 | Tmprss9 | 1,50 | No  |
| ENSMUSG00000059408 | -3,83E-02 | -3,107651936 | -7,91E-11 | 1,00E+00 | 1,00E+00 | Mrgprh  | 0,97 | No  |
| ENSMUSG00000059409 | -1,23E-03 | 6,30655525   | 3,74E-04  | 9,85E-01 | 1,00E+00 | Ppp2r5d | 1,00 | No  |
| ENSMUSG00000059412 | 1,81E-01  | -0,641329398 | 2,16E-01  | 6,42E-01 | 8,71E-01 | Fxyd2   | 1,13 | No  |
| ENSMUSG00000059422 | 1,48E-01  | 3,980701898  | 2,75E+00  | 9,74E-02 | 3,89E-01 | Gm8116  | 1,11 | No  |
| ENSMUSG00000059423 | -3,93E-01 | 3,690201632  | 1,75E+01  | 2,86E-05 | 8,42E-04 | Zfp933  | 0,76 | Yes |
| ENSMUSG00000059429 | -1,94E+00 | -3,107619243 | 1,50E+00  | 2,21E-01 | 5,50E-01 | Olfr365 | 0,26 | No  |
| ENSMUSG00000059430 | 3,43E-01  | -1,54841855  | 3,79E-01  | 5,38E-01 | 8,09E-01 | Actg2   | 1,27 | No  |
| ENSMUSG00000059434 | 3,14E-02  | -3,107617333 | -7,69E-10 | 1,00E+00 | 1,00E+00 | Gckr    | 1,02 | No  |
| ENSMUSG00000059436 | 4,73E-02  | 6,238716272  | 5,45E-01  | 4,60E-01 | 7,49E-01 | Max     | 1,03 | No  |
| ENSMUSG00000059439 | 3,19E-02  | 4,531534675  | 1,58E-01  | 6,91E-01 | 9,00E-01 | Bcas3   | 1,02 | No  |
| ENSMUSG00000059447 | -9,35E-03 | 4,346793392  | 1,27E-02  | 9,10E-01 | 1,00E+00 | Hadhb   | 0,99 | No  |
| ENSMUSG00000059456 | -7,29E-02 | 6,931969376  | 1,43E+00  | 2,32E-01 | 5,50E-01 | Ptk2b   | 0,95 | No  |

|                    |           |              |           |          |          |               |      |     |
|--------------------|-----------|--------------|-----------|----------|----------|---------------|------|-----|
| ENSMUSG00000059459 | -6,64E-02 | -2,247078195 | 7,14E-03  | 9,33E-01 | 1,00E+00 | Gm10065       | 0,96 | No  |
| ENSMUSG00000059460 | -3,83E-02 | -3,107651936 | -7,91E-11 | 1,00E+00 | 1,00E+00 | Olf286        | 0,97 | No  |
| ENSMUSG00000059463 | -1,60E+00 | -2,185539083 | 4,30E+00  | 3,81E-02 | 2,32E-01 | Spag11b       | 0,33 | No  |
| ENSMUSG00000059474 | -1,20E-01 | 6,344020265  | 3,57E+00  | 5,87E-02 | 3,00E-01 | Mbtd1         | 0,92 | No  |
| ENSMUSG00000059475 | 9,50E-02  | 4,216067466  | 1,30E+00  | 2,54E-01 | 5,50E-01 | Zfp426        | 1,07 | No  |
| ENSMUSG00000059479 | 1,27E-01  | 5,384839618  | 3,23E+00  | 7,22E-02 | 3,41E-01 | B3gnt8        | 1,09 | No  |
| ENSMUSG00000059481 | 1,87E+00  | -3,107639691 | 1,38E+00  | 2,40E-01 | 5,50E-01 | Plg           | 3,67 | No  |
| ENSMUSG00000059482 | 1,16E-01  | 3,385377606  | 1,29E+00  | 2,56E-01 | 5,50E-01 | 2610301B20Rik | 1,08 | No  |
| ENSMUSG00000059486 | 1,38E-01  | 5,510015917  | 3,98E+00  | 4,60E-02 | 2,56E-01 | Kbtbd2        | 1,10 | No  |
| ENSMUSG00000059495 | -1,14E-01 | 5,653568279  | 2,82E+00  | 9,31E-02 | 3,83E-01 | Arhgef12      | 0,92 | No  |
| ENSMUSG00000059498 | 1,78E-01  | 9,460093837  | 9,88E+00  | 1,67E-03 | 2,43E-02 | Fcgr3         | 1,13 | Yes |
| ENSMUSG00000059518 | 2,95E-02  | 4,832608369  | 1,48E-01  | 7,01E-01 | 9,05E-01 | Znhit1        | 1,02 | No  |
| ENSMUSG00000059534 | -7,81E-02 | 6,136698657  | 1,47E+00  | 2,26E-01 | 5,50E-01 | Uqcr10        | 0,95 | No  |
| ENSMUSG00000059540 | -2,19E-01 | 1,897652881  | 1,97E+00  | 1,60E-01 | 5,08E-01 | Tcea2         | 0,86 | No  |
| ENSMUSG00000059552 | 3,81E-02  | 5,905528397  | 3,34E-01  | 5,63E-01 | 8,26E-01 | Trp53         | 1,03 | No  |
| ENSMUSG00000059554 | -8,42E-03 | 2,995801549  | 5,65E-03  | 9,40E-01 | 1,00E+00 | Ccdc28a       | 0,99 | No  |
| ENSMUSG00000059555 | 2,42E-01  | 6,014585612  | 1,39E+01  | 1,88E-04 | 4,13E-03 | Tor4a         | 1,18 | Yes |
| ENSMUSG00000059562 | -2,80E-01 | -1,107613771 | 3,75E-01  | 5,40E-01 | 8,10E-01 | Ccdc154       | 0,82 | No  |
| ENSMUSG00000059565 | -6,81E-02 | -2,896149338 | 3,18E-03  | 9,55E-01 | 1,00E+00 | Gm5292        | 0,95 | No  |
| ENSMUSG00000059571 | -1,89E+00 | -3,1076441   | 1,42E+00  | 2,33E-01 | 5,50E-01 | Gm16218       | 0,27 | No  |
| ENSMUSG00000059585 | -7,45E-02 | 1,455300964  | 1,67E-01  | 6,83E-01 | 8,95E-01 | Ube2nl        | 0,95 | No  |
| ENSMUSG00000059586 | 1,53E-01  | 4,286048899  | 3,32E+00  | 6,86E-02 | 3,29E-01 | Nsmce2        | 1,11 | No  |
| ENSMUSG00000059588 | 3,04E-01  | 3,188333506  | 8,18E+00  | 4,24E-03 | 4,94E-02 | Calcr1        | 1,23 | Yes |
| ENSMUSG00000059602 | -9,40E-01 | 1,57736087   | 3,35E+01  | 7,04E-09 | 5,03E-07 | Syn3          | 0,52 | Yes |
| ENSMUSG00000059606 | 4,96E-01  | -0,522710821 | 1,80E+00  | 1,80E-01 | 5,41E-01 | Rnase2b       | 1,41 | No  |
| ENSMUSG00000059610 | -1,90E+00 | -2,963239763 | 1,44E+00  | 2,31E-01 | 5,50E-01 | Olf222        | 0,27 | No  |
| ENSMUSG00000059625 | -1,87E+00 | -3,107637761 | 1,39E+00  | 2,38E-01 | 5,50E-01 | Sohlh1        | 0,27 | No  |
| ENSMUSG00000059631 | -1,87E+00 | -3,033619006 | 1,41E+00  | 2,36E-01 | 5,50E-01 | 1500035N22Rik | 0,27 | No  |
| ENSMUSG00000059639 | 2,44E-01  | 3,071157241  | 4,66E+00  | 3,09E-02 | 2,03E-01 | Clec4a4       | 1,18 | No  |
| ENSMUSG00000059647 | 5,80E-02  | 3,191244013  | 2,93E-01  | 5,89E-01 | 8,41E-01 | Cbx3-ps7      | 1,04 | No  |
| ENSMUSG00000059657 | 1,44E-01  | -1,548287492 | 6,79E-02  | 7,94E-01 | 9,56E-01 | Stfa2l1       | 1,11 | No  |
| ENSMUSG00000059658 | 1,74E-01  | 2,533882937  | 1,84E+00  | 1,75E-01 | 5,33E-01 | Gm16379       | 1,13 | No  |

|                    |           |              |          |          |          |               |      |     |
|--------------------|-----------|--------------|----------|----------|----------|---------------|------|-----|
| ENSMUSG00000059659 | 1,06E-01  | 1,935301921  | 4,76E-01 | 4,90E-01 | 7,76E-01 | Gm10069       | 1,08 | No  |
| ENSMUSG00000059668 | -1,94E+00 | -3,107619243 | 1,50E+00 | 2,21E-01 | 5,50E-01 | Krt4          | 0,26 | No  |
| ENSMUSG00000059669 | -2,81E-01 | 3,274552351  | 7,21E+00 | 7,27E-03 | 7,38E-02 | Taf1b         | 0,82 | No  |
| ENSMUSG00000059674 | 1,36E-01  | 0,707652342  | 3,42E-01 | 5,59E-01 | 8,22E-01 | Cdh24         | 1,10 | No  |
| ENSMUSG00000059687 | 4,43E-01  | -2,497595722 | 1,53E-01 | 6,95E-01 | 9,02E-01 | Olf108        | 1,36 | No  |
| ENSMUSG00000059689 | -4,53E-02 | 3,506686054  | 2,12E-01 | 6,45E-01 | 8,73E-01 | Zfp637        | 0,97 | No  |
| ENSMUSG00000059706 | -1,94E+00 | -3,107619243 | 1,50E+00 | 2,21E-01 | 5,50E-01 | A830035A12Rik | 0,26 | No  |
| ENSMUSG00000059713 | 8,79E-02  | 6,218380333  | 1,89E+00 | 1,69E-01 | 5,25E-01 | Rcan3         | 1,06 | No  |
| ENSMUSG00000059714 | -6,27E-02 | 5,792125807  | 8,79E-01 | 3,48E-01 | 6,49E-01 | Flot1         | 0,96 | No  |
| ENSMUSG00000059729 | -8,41E-01 | -2,89611984  | 3,88E-01 | 5,33E-01 | 8,06E-01 | Olf1385       | 0,56 | No  |
| ENSMUSG00000059734 | -6,06E-02 | 4,861598722  | 6,38E-01 | 4,25E-01 | 7,19E-01 | Ndufs8        | 0,96 | No  |
| ENSMUSG00000059742 | -6,25E-01 | 1,140404956  | 1,01E+01 | 1,46E-03 | 2,19E-02 | Kcnh7         | 0,65 | Yes |
| ENSMUSG00000059743 | 2,55E-01  | 3,860301429  | 7,73E+00 | 5,44E-03 | 5,94E-02 | Fdps          | 1,19 | No  |
| ENSMUSG00000059751 | -2,04E-01 | 7,23724169   | 1,16E+01 | 6,59E-04 | 1,15E-02 | Rps3a3        | 0,87 | Yes |
| ENSMUSG00000059772 | -2,22E-02 | 3,350112942  | 4,80E-02 | 8,27E-01 | 9,75E-01 | Slx1b         | 0,98 | No  |
| ENSMUSG00000059775 | -1,83E-01 | 8,55130276   | 1,01E+01 | 1,45E-03 | 2,18E-02 | Rps26-ps1     | 0,88 | Yes |
| ENSMUSG00000059776 | -1,35E-01 | 7,242263448  | 5,08E+00 | 2,41E-02 | 1,71E-01 | Rpl13-ps6     | 0,91 | No  |
| ENSMUSG00000059791 | 2,30E-01  | 4,002292397  | 6,61E+00 | 1,02E-02 | 9,44E-02 | Nrm           | 1,17 | No  |
| ENSMUSG00000059796 | 2,79E-02  | 8,030882882  | 2,30E-01 | 6,32E-01 | 8,64E-01 | Eif4a1        | 1,02 | No  |
| ENSMUSG00000059810 | -1,26E-01 | 4,559655497  | 2,57E+00 | 1,09E-01 | 4,04E-01 | Rgs3          | 0,92 | No  |
| ENSMUSG00000059811 | -1,13E-02 | 4,884846271  | 2,28E-02 | 8,80E-01 | 1,00E+00 | Atl2          | 0,99 | No  |
| ENSMUSG00000059816 | -8,45E-01 | -2,963229433 | 3,92E-01 | 5,31E-01 | 8,05E-01 | Fam159a       | 0,56 | No  |
| ENSMUSG00000059820 | -9,75E-02 | 5,112190963  | 1,79E+00 | 1,81E-01 | 5,42E-01 | AU019823      | 0,93 | No  |
| ENSMUSG00000059824 | -1,20E-01 | 1,737150025  | 5,58E-01 | 4,55E-01 | 7,45E-01 | Dbp           | 0,92 | No  |
| ENSMUSG00000059827 | -1,98E-02 | -3,033655952 | 2,83E-11 | 1,00E+00 | 1,00E+00 | Gm5670        | 0,99 | No  |
| ENSMUSG00000059830 | 4,33E-02  | 2,411592278  | 1,09E-01 | 7,41E-01 | 9,27E-01 | Gm16380       | 1,03 | No  |
| ENSMUSG00000059834 | 7,21E-03  | 2,881747166  | 3,83E-03 | 9,51E-01 | 1,00E+00 | Sclt1         | 1,01 | No  |
| ENSMUSG00000059835 | -2,85E-01 | 4,16773509   | 1,09E+01 | 9,83E-04 | 1,60E-02 | Rpl13-ps3     | 0,82 | Yes |
| ENSMUSG00000059839 | 2,00E-01  | 1,774318202  | 1,58E+00 | 2,09E-01 | 5,50E-01 | Zfp874b       | 1,15 | No  |
| ENSMUSG00000059842 | 3,98E-02  | 2,169337973  | 8,34E-02 | 7,73E-01 | 9,44E-01 | Zfp341        | 1,03 | No  |
| ENSMUSG00000059851 | 5,71E-02  | 6,417724138  | 8,24E-01 | 3,64E-01 | 6,65E-01 | Kmt5c         | 1,04 | No  |
| ENSMUSG00000059852 | 2,29E-02  | -0,289418706 | 5,19E-03 | 9,43E-01 | 1,00E+00 | Kcng2         | 1,02 | No  |

|                    |           |              |           |          |          |               |      |     |
|--------------------|-----------|--------------|-----------|----------|----------|---------------|------|-----|
| ENSMUSG00000059854 | -1,38E+00 | -2,831984188 | 1,20E+00  | 2,74E-01 | 5,71E-01 | Hydin         | 0,38 | No  |
| ENSMUSG00000059857 | 1,87E+00  | -3,107639691 | 1,38E+00  | 2,40E-01 | 5,50E-01 | Ntng1         | 3,67 | No  |
| ENSMUSG00000059864 | -1,77E-01 | -0,510167502 | 2,33E-01  | 6,29E-01 | 8,62E-01 | Olfr1393      | 0,88 | No  |
| ENSMUSG00000059866 | 9,66E-03  | 5,850702771  | 2,12E-02  | 8,84E-01 | 1,00E+00 | Tnip2         | 1,01 | No  |
| ENSMUSG00000059873 | 1,87E+00  | -3,107639691 | 1,38E+00  | 2,40E-01 | 5,50E-01 | Olfr1029      | 3,67 | No  |
| ENSMUSG00000059878 | -1,51E-02 | 4,654846605  | 3,77E-02  | 8,46E-01 | 9,87E-01 | Zfp422        | 0,99 | No  |
| ENSMUSG00000059883 | 2,20E-02  | 5,673364235  | 1,06E-01  | 7,45E-01 | 9,29E-01 | Irak4         | 1,02 | No  |
| ENSMUSG00000059887 | -3,83E-02 | -3,107651936 | -7,91E-11 | 1,00E+00 | 1,00E+00 | Olfr1507      | 0,97 | No  |
| ENSMUSG00000059890 | -3,51E-03 | 7,010265495  | 3,35E-03  | 9,54E-01 | 1,00E+00 | Ube4a         | 1,00 | No  |
| ENSMUSG00000059891 | 1,72E-01  | -2,448739611 | 4,40E-02  | 8,34E-01 | 9,79E-01 | Tsks          | 1,13 | No  |
| ENSMUSG00000059895 | 8,85E-03  | 4,832784941  | 1,35E-02  | 9,07E-01 | 1,00E+00 | Ptp4a3        | 1,01 | No  |
| ENSMUSG00000059897 | 3,82E-02  | 2,411676389  | 8,54E-02  | 7,70E-01 | 9,42E-01 | Zfp930        | 1,03 | No  |
| ENSMUSG00000059900 | 1,77E-01  | 0,742231912  | 6,34E-01  | 4,26E-01 | 7,20E-01 | Tmem40        | 1,13 | No  |
| ENSMUSG00000059901 | -7,98E-01 | -1,627582166 | 1,88E+00  | 1,70E-01 | 5,26E-01 | Adamts14      | 0,58 | No  |
| ENSMUSG00000059912 | 3,43E-02  | 1,152067128  | 3,12E-02  | 8,60E-01 | 9,95E-01 | Rpl21-ps6     | 1,02 | No  |
| ENSMUSG00000059920 | 6,22E-02  | 4,64352825   | 6,25E-01  | 4,29E-01 | 7,23E-01 | 4930453N24Rik | 1,04 | No  |
| ENSMUSG00000059921 | -2,41E-01 | -0,832149776 | 3,58E-01  | 5,50E-01 | 8,17E-01 | Unc5c         | 0,85 | No  |
| ENSMUSG00000059923 | -7,01E-02 | 7,637972109  | 1,42E+00  | 2,34E-01 | 5,50E-01 | Grb2          | 0,95 | No  |
| ENSMUSG00000059939 | -3,30E-02 | 4,345730428  | 1,62E-01  | 6,87E-01 | 8,98E-01 | 9430015G10Rik | 0,98 | No  |
| ENSMUSG00000059956 | 5,67E-01  | 1,968444322  | 1,31E+01  | 3,01E-04 | 6,07E-03 | Serpib12      | 1,48 | Yes |
| ENSMUSG00000059970 | 1,97E-01  | 1,829310847  | 1,46E+00  | 2,27E-01 | 5,50E-01 | Hspa2         | 1,15 | No  |
| ENSMUSG00000059975 | 1,03E-02  | 2,784846159  | 7,61E-03  | 9,30E-01 | 1,00E+00 | Zfp74         | 1,01 | No  |
| ENSMUSG00000059981 | 3,45E-02  | 6,521506794  | 3,06E-01  | 5,80E-01 | 8,37E-01 | Taok2         | 1,02 | No  |
| ENSMUSG00000059991 | -1,60E+00 | -1,472837707 | 8,96E+00  | 2,76E-03 | 3,58E-02 | Nptx2         | 0,33 | Yes |
| ENSMUSG00000059994 | -4,98E-02 | 0,52104397   | 3,99E-02  | 8,42E-01 | 9,85E-01 | Fcrl1         | 0,97 | No  |
| ENSMUSG00000059995 | -3,74E-02 | 6,489120589  | 3,57E-01  | 5,50E-01 | 8,17E-01 | Atxn7l3       | 0,97 | No  |
| ENSMUSG00000060002 | -6,60E-02 | 4,377193896  | 6,40E-01  | 4,24E-01 | 7,18E-01 | Chpt1         | 0,96 | No  |
| ENSMUSG00000060012 | -1,20E-01 | 5,720774396  | 3,18E+00  | 7,46E-02 | 3,47E-01 | Kif13b        | 0,92 | No  |
| ENSMUSG00000060019 | -9,63E-02 | 8,653546162  | 2,82E+00  | 9,30E-02 | 3,83E-01 | Gm10073       | 0,94 | No  |
| ENSMUSG00000060029 | -2,24E-02 | 2,789939572  | 3,54E-02  | 8,51E-01 | 9,90E-01 | 4930473A02Rik | 0,98 | No  |
| ENSMUSG00000060032 | 4,12E-02  | 5,339858819  | 3,36E-01  | 5,62E-01 | 8,25E-01 | H2afj         | 1,03 | No  |
| ENSMUSG00000060034 | -1,06E+00 | -0,711452475 | 6,93E+00  | 8,47E-03 | 8,27E-02 | Ctf2          | 0,48 | No  |

|                    |           |              |           |          |          |           |      |     |
|--------------------|-----------|--------------|-----------|----------|----------|-----------|------|-----|
| ENSMUSG00000060036 | -1,16E-02 | 6,901695915  | 3,63E-02  | 8,49E-01 | 9,88E-01 | Rpl3      | 0,99 | No  |
| ENSMUSG00000060038 | -2,82E-02 | 4,265383656  | 1,12E-01  | 7,38E-01 | 9,25E-01 | Dhps      | 0,98 | No  |
| ENSMUSG00000060044 | -1,15E+00 | -0,963290706 | 7,09E+00  | 7,74E-03 | 7,71E-02 | Tmem26    | 0,45 | No  |
| ENSMUSG00000060049 | -1,95E+00 | -3,033628749 | 1,50E+00  | 2,21E-01 | 5,50E-01 | Olf235    | 0,26 | No  |
| ENSMUSG00000060063 | 1,95E-01  | 7,719659244  | 1,09E+01  | 9,52E-04 | 1,56E-02 | Alox5ap   | 1,14 | Yes |
| ENSMUSG00000060068 | 2,05E-01  | 2,633575993  | 2,61E+00  | 1,06E-01 | 3,99E-01 | Gm12222   | 1,15 | No  |
| ENSMUSG00000060073 | -2,17E-02 | 3,31486385   | 4,36E-02  | 8,35E-01 | 9,80E-01 | Psma3     | 0,99 | No  |
| ENSMUSG00000060093 | -7,41E-01 | -1,424897595 | 1,76E+00  | 1,85E-01 | 5,49E-01 | Hist1h4a  | 0,60 | No  |
| ENSMUSG00000060096 | 2,75E-01  | 3,661839252  | 8,18E+00  | 4,24E-03 | 4,94E-02 | Amd-ps3   | 1,21 | Yes |
| ENSMUSG00000060098 | 4,27E-02  | 4,154944678  | 2,49E-01  | 6,18E-01 | 8,55E-01 | Prmt7     | 1,03 | No  |
| ENSMUSG00000060121 | 1,66E-01  | 2,439958394  | 1,60E+00  | 2,06E-01 | 5,50E-01 | Gemin2    | 1,12 | No  |
| ENSMUSG00000060126 | -1,45E-01 | 7,290472508  | 5,90E+00  | 1,51E-02 | 1,27E-01 | Tpt1      | 0,90 | No  |
| ENSMUSG00000060128 | -1,42E-01 | -0,074645069 | 2,11E-01  | 6,46E-01 | 8,74E-01 | Gm2710    | 0,91 | No  |
| ENSMUSG00000060131 | 2,89E-01  | 7,398162868  | 2,35E+01  | 1,27E-06 | 5,48E-05 | Atp8b4    | 1,22 | Yes |
| ENSMUSG00000060143 | -2,02E-01 | 7,007846712  | 1,10E+01  | 9,12E-04 | 1,50E-02 | Gm10076   | 0,87 | Yes |
| ENSMUSG00000060147 | -1,75E-02 | 6,808308042  | 8,12E-02  | 7,76E-01 | 9,45E-01 | Serpinb6a | 0,99 | No  |
| ENSMUSG00000060149 | 1,77E-01  | 2,586759656  | 1,98E+00  | 1,60E-01 | 5,07E-01 | BC002059  | 1,13 | No  |
| ENSMUSG00000060152 | -3,82E-02 | 4,396927063  | 2,16E-01  | 6,42E-01 | 8,71E-01 | Pop5      | 0,97 | No  |
| ENSMUSG00000060161 | -6,64E-01 | -1,448651582 | 1,51E+00  | 2,18E-01 | 5,50E-01 | Klk1b7-ps | 0,63 | No  |
| ENSMUSG00000060166 | 5,62E-02  | 5,491693005  | 6,58E-01  | 4,17E-01 | 7,12E-01 | Zdhhc8    | 1,04 | No  |
| ENSMUSG00000060170 | 9,01E-03  | -3,107646452 | -5,16E-10 | 1,00E+00 | 1,00E+00 | Olf1371   | 1,01 | No  |
| ENSMUSG00000060176 | -7,66E-01 | -1,322017726 | 2,51E+00  | 1,13E-01 | 4,15E-01 | Kif27     | 0,59 | No  |
| ENSMUSG00000060180 | -7,38E-02 | -3,033659033 | 2,66E-03  | 9,59E-01 | 1,00E+00 | Myh13     | 0,95 | No  |
| ENSMUSG00000060181 | 2,01E-01  | 3,435130624  | 4,10E+00  | 4,28E-02 | 2,46E-01 | Slc35e3   | 1,15 | No  |
| ENSMUSG00000060183 | 4,94E-03  | -2,896132518 | -4,80E-12 | 1,00E+00 | 1,00E+00 | Cxcl11    | 1,00 | No  |
| ENSMUSG00000060187 | 1,81E+00  | -3,10765737  | 1,28E+00  | 2,58E-01 | 5,50E-01 | Lrrc10    | 3,49 | No  |
| ENSMUSG00000060188 | -1,92E+00 | -3,033623267 | 1,46E+00  | 2,27E-01 | 5,50E-01 | Cxcl17    | 0,26 | No  |
| ENSMUSG00000060198 | -7,08E-02 | 6,943753257  | 1,35E+00  | 2,45E-01 | 5,50E-01 | Gm11353   | 0,95 | No  |
| ENSMUSG00000060206 | -2,19E-01 | -1,997962988 | 1,06E-01  | 7,45E-01 | 9,29E-01 | Zfp462    | 0,86 | No  |
| ENSMUSG00000060212 | -2,68E-01 | -0,929272359 | 4,09E-01  | 5,23E-01 | 8,01E-01 | Pcnx2     | 0,83 | No  |
| ENSMUSG00000060216 | -1,69E-01 | 6,954053925  | 7,68E+00  | 5,57E-03 | 6,05E-02 | Arrb2     | 0,89 | No  |
| ENSMUSG00000060224 | 2,48E-01  | -0,136537112 | 6,02E-01  | 4,38E-01 | 7,31E-01 | Pyroxd2   | 1,19 | No  |

|                    |           |              |           |          |          |               |      |     |
|--------------------|-----------|--------------|-----------|----------|----------|---------------|------|-----|
| ENSMUSG00000060227 | -5,34E-02 | -1,998071876 | 5,95E-03  | 9,39E-01 | 1,00E+00 | Casc4         | 0,96 | No  |
| ENSMUSG00000060240 | -1,50E-01 | -1,424816235 | 9,76E-02  | 7,55E-01 | 9,34E-01 | Cend1         | 0,90 | No  |
| ENSMUSG00000060244 | -1,37E-01 | 1,750525675  | 6,87E-01  | 4,07E-01 | 7,04E-01 | Alyref2       | 0,91 | No  |
| ENSMUSG00000060256 | -1,89E+00 | -3,1076441   | 1,42E+00  | 2,33E-01 | 5,50E-01 | Tdpoz4        | 0,27 | No  |
| ENSMUSG00000060257 | -1,89E+00 | -3,1076441   | 1,42E+00  | 2,33E-01 | 5,50E-01 | Scrt2         | 0,27 | No  |
| ENSMUSG00000060260 | 2,74E-01  | 3,829263489  | 9,04E+00  | 2,64E-03 | 3,47E-02 | Pwwp2b        | 1,21 | Yes |
| ENSMUSG00000060261 | 6,12E-02  | 5,970923136  | 8,68E-01  | 3,51E-01 | 6,53E-01 | Gtf2i         | 1,04 | No  |
| ENSMUSG00000060268 | 3,18E-01  | -1,896147098 | 2,28E-01  | 6,33E-01 | 8,65E-01 | Gm1661        | 1,25 | No  |
| ENSMUSG00000060275 | 1,98E-01  | -0,770547565 | 2,49E-01  | 6,18E-01 | 8,55E-01 | Nrg2          | 1,15 | No  |
| ENSMUSG00000060279 | 9,08E-02  | 6,664365833  | 2,14E+00  | 1,44E-01 | 4,79E-01 | Ap2a1         | 1,06 | No  |
| ENSMUSG00000060284 | -5,85E-01 | -1,740762404 | 9,47E-01  | 3,31E-01 | 6,31E-01 | Sp7           | 0,67 | No  |
| ENSMUSG00000060288 | 1,19E-02  | 2,819109156  | 9,85E-03  | 9,21E-01 | 1,00E+00 | Ppih          | 1,01 | No  |
| ENSMUSG00000060301 | 6,43E-02  | 2,593459618  | 2,85E-01  | 5,94E-01 | 8,43E-01 | 2610008E11Rik | 1,05 | No  |
| ENSMUSG00000060311 | 4,52E-01  | 3,751052616  | 2,27E+01  | 1,90E-06 | 7,77E-05 | Mucl1         | 1,37 | Yes |
| ENSMUSG00000060314 | -4,21E-01 | -0,733281205 | 1,14E+00  | 2,85E-01 | 5,82E-01 | Zfp941        | 0,75 | No  |
| ENSMUSG00000060332 | -1,33E+00 | -2,83201525  | 1,11E+00  | 2,93E-01 | 5,88E-01 | Tmc2          | 0,40 | No  |
| ENSMUSG00000060336 | 1,73E-01  | 0,40581333   | 4,93E-01  | 4,83E-01 | 7,70E-01 | Zfp937        | 1,13 | No  |
| ENSMUSG00000060371 | 9,01E-03  | -3,107646452 | -5,16E-10 | 1,00E+00 | 1,00E+00 | Caln1         | 1,01 | No  |
| ENSMUSG00000060373 | -1,12E-01 | 7,171694344  | 3,47E+00  | 6,25E-02 | 3,11E-01 | Hnrnpc        | 0,93 | No  |
| ENSMUSG00000060376 | -1,61E-02 | 4,38335229   | 3,84E-02  | 8,45E-01 | 9,86E-01 | Bckdha        | 0,99 | No  |
| ENSMUSG00000060377 | -1,34E-01 | 5,038388505  | 3,34E+00  | 6,78E-02 | 3,28E-01 | Rpl36a-ps1    | 0,91 | No  |
| ENSMUSG00000060380 | -2,10E-01 | 0,0240095    | 4,92E-01  | 4,83E-01 | 7,70E-01 | C030014I23Rik | 0,86 | No  |
| ENSMUSG00000060397 | 1,01E-01  | 1,395380557  | 3,53E-01  | 5,52E-01 | 8,19E-01 | Zfp128        | 1,07 | No  |
| ENSMUSG00000060402 | -6,81E-02 | -2,711721797 | 4,24E-03  | 9,48E-01 | 1,00E+00 | Chst8         | 0,95 | No  |
| ENSMUSG00000060404 | -1,94E+00 | -3,107619243 | 1,50E+00  | 2,21E-01 | 5,50E-01 | Olfr1369-ps1  | 0,26 | No  |
| ENSMUSG00000060416 | 1,24E+00  | -2,770618059 | 9,48E-01  | 3,30E-01 | 6,31E-01 | Gm839         | 2,36 | No  |
| ENSMUSG00000060417 | -8,93E-02 | -2,96327978  | 3,63E-03  | 9,52E-01 | 1,00E+00 | Gm8603        | 0,94 | No  |
| ENSMUSG00000060419 | -7,60E-02 | 9,14520855   | 1,79E+00  | 1,81E-01 | 5,42E-01 | Rps16-ps2     | 0,95 | No  |
| ENSMUSG00000060427 | -1,18E-01 | 3,711658889  | 1,56E+00  | 2,12E-01 | 5,50E-01 | Zfp868        | 0,92 | No  |
| ENSMUSG00000060429 | -3,27E-01 | 0,794541792  | 2,18E+00  | 1,40E-01 | 4,72E-01 | Sntb1         | 0,80 | No  |
| ENSMUSG00000060438 | -1,11E-01 | 7,053564469  | 3,36E+00  | 6,70E-02 | 3,26E-01 | Rps10-ps1     | 0,93 | No  |
| ENSMUSG00000060441 | -3,73E-02 | 3,610353564  | 1,54E-01  | 6,95E-01 | 9,02E-01 | Trim5         | 0,97 | No  |

|                    |           |              |          |          |          |               |      |     |
|--------------------|-----------|--------------|----------|----------|----------|---------------|------|-----|
| ENSMUSG00000060445 | 3,38E-01  | 0,882973969  | 2,35E+00 | 1,25E-01 | 4,43E-01 | Sycp2         | 1,26 | No  |
| ENSMUSG00000060450 | -5,03E-02 | 6,134471441  | 6,08E-01 | 4,35E-01 | 7,28E-01 | Rnf14         | 0,97 | No  |
| ENSMUSG00000060459 | -5,25E-02 | -3,033661434 | 4,08E-11 | 1,00E+00 | 1,00E+00 | Kng2          | 0,96 | No  |
| ENSMUSG00000060467 | -1,27E-01 | 6,612930053  | 4,15E+00 | 4,17E-02 | 2,43E-01 | Gm10080       | 0,92 | No  |
| ENSMUSG00000060470 | 1,94E-03  | 1,91056361   | 1,60E-04 | 9,90E-01 | 1,00E+00 | Adgrg3        | 1,00 | No  |
| ENSMUSG00000060475 | -8,86E-02 | 6,310969972  | 1,95E+00 | 1,63E-01 | 5,13E-01 | Wtap          | 0,94 | No  |
| ENSMUSG00000060477 | -9,13E-02 | 6,456259479  | 2,10E+00 | 1,47E-01 | 4,85E-01 | Irak2         | 0,94 | No  |
| ENSMUSG00000060487 | 2,66E-01  | 3,64856955   | 7,46E+00 | 6,31E-03 | 6,66E-02 | Samd5         | 1,20 | No  |
| ENSMUSG00000060508 | -1,87E+00 | -3,033619006 | 1,41E+00 | 2,36E-01 | 5,50E-01 | Nlrp9b        | 0,27 | No  |
| ENSMUSG00000060509 | 1,14E+00  | 1,64399235   | 4,20E+01 | 9,24E-11 | 8,79E-09 | Xcr1          | 2,21 | Yes |
| ENSMUSG00000060510 | 3,30E-02  | 4,533863343  | 1,74E-01 | 6,77E-01 | 8,91E-01 | Zfp266        | 1,02 | No  |
| ENSMUSG00000060512 | 4,21E-01  | 0,045562793  | 1,93E+00 | 1,65E-01 | 5,17E-01 | 0610040J01Rik | 1,34 | No  |
| ENSMUSG00000060519 | 2,22E-01  | 6,05682116   | 1,18E+01 | 6,02E-04 | 1,07E-02 | Tor3a         | 1,17 | Yes |
| ENSMUSG00000060538 | -8,58E-02 | 5,019536979  | 1,36E+00 | 2,43E-01 | 5,50E-01 | Tmem219       | 0,94 | No  |
| ENSMUSG00000060548 | 1,57E+00  | -2,497658921 | 2,69E+00 | 1,01E-01 | 3,92E-01 | Tnfrsf19      | 2,97 | No  |
| ENSMUSG00000060550 | -6,33E-01 | 6,039901381  | 9,49E+01 | 1,98E-22 | 5,88E-20 | H2-Q7         | 0,64 | Yes |
| ENSMUSG00000060556 | 1,63E+00  | -2,711739573 | 1,82E+00 | 1,77E-01 | 5,36E-01 | Olf1418       | 3,09 | No  |
| ENSMUSG00000060566 | -2,88E-01 | -2,355549477 | 1,44E-01 | 7,04E-01 | 9,06E-01 | Rpl21-ps3     | 0,82 | No  |
| ENSMUSG00000060568 | 2,20E-01  | 2,36764198   | 2,67E+00 | 1,02E-01 | 3,94E-01 | Fam78b        | 1,16 | No  |
| ENSMUSG00000060572 | -7,10E-02 | -1,863713643 | 1,17E-02 | 9,14E-01 | 1,00E+00 | Mfap2         | 0,95 | No  |
| ENSMUSG00000060579 | 1,55E+00  | -2,355680901 | 2,62E+00 | 1,06E-01 | 3,98E-01 | Fhit          | 2,93 | No  |
| ENSMUSG00000060586 | -1,16E-01 | 11,28142136  | 4,32E+00 | 3,76E-02 | 2,31E-01 | H2-Eb1        | 0,92 | No  |
| ENSMUSG00000060591 | -2,43E-01 | 5,242982463  | 1,14E+01 | 7,27E-04 | 1,25E-02 | Ifitm2        | 0,85 | Yes |
| ENSMUSG00000060594 | -3,41E-01 | 2,024348438  | 5,30E+00 | 2,13E-02 | 1,57E-01 | Layn          | 0,79 | No  |
| ENSMUSG00000060600 | -5,42E-01 | 4,005931723  | 3,88E+01 | 4,58E-10 | 3,95E-08 | Eno3          | 0,69 | Yes |
| ENSMUSG00000060601 | -1,78E-02 | 6,674555148  | 8,26E-02 | 7,74E-01 | 9,44E-01 | Nr1h2         | 0,99 | No  |
| ENSMUSG00000060615 | -7,38E-02 | -3,033634644 | 2,66E-03 | 9,59E-01 | 1,00E+00 | Ang4          | 0,95 | No  |
| ENSMUSG00000060621 | 1,23E+00  | -1,963281506 | 3,19E+00 | 7,41E-02 | 3,46E-01 | Nkpd1         | 2,35 | No  |
| ENSMUSG00000060636 | -1,97E-01 | 4,913570654  | 6,95E+00 | 8,38E-03 | 8,21E-02 | Rpl35a        | 0,87 | No  |
| ENSMUSG00000060639 | -1,75E-01 | 2,150960927  | 1,38E+00 | 2,40E-01 | 5,50E-01 | Hist1h4i      | 0,89 | No  |
| ENSMUSG00000060647 | -1,19E-01 | 4,619626181  | 2,32E+00 | 1,27E-01 | 4,48E-01 | Gm7099        | 0,92 | No  |
| ENSMUSG00000060657 | -7,57E-02 | 6,482713655  | 1,47E+00 | 2,25E-01 | 5,50E-01 | Marf1         | 0,95 | No  |

|                    |           |              |           |          |          |               |      |     |
|--------------------|-----------|--------------|-----------|----------|----------|---------------|------|-----|
| ENSMUSG00000060663 | -8,44E-01 | -2,770627609 | 3,91E-01  | 5,32E-01 | 8,06E-01 | Olf175-ps1    | 0,56 | No  |
| ENSMUSG00000060671 | 1,12E-01  | 5,91522318   | 2,85E+00  | 9,11E-02 | 3,82E-01 | Atp8b2        | 1,08 | No  |
| ENSMUSG00000060675 | -6,46E-01 | 3,75354083   | 4,71E+01  | 6,62E-12 | 7,27E-10 | Pla2g16       | 0,64 | Yes |
| ENSMUSG00000060678 | -2,13E-01 | -1,831969383 | 1,11E-01  | 7,39E-01 | 9,26E-01 | Hist1h4c      | 0,86 | No  |
| ENSMUSG00000060679 | 3,07E-02  | 4,593511629  | 1,49E-01  | 7,00E-01 | 9,04E-01 | Mrps9         | 1,02 | No  |
| ENSMUSG00000060680 | -1,89E-01 | 7,085771049  | 9,84E+00  | 1,71E-03 | 2,46E-02 | Gm8894        | 0,88 | Yes |
| ENSMUSG00000060703 | -1,04E-02 | 5,839674684  | 2,46E-02  | 8,75E-01 | 1,00E+00 | Cd302         | 0,99 | No  |
| ENSMUSG00000060708 | 1,51E-02  | 4,206753686  | 3,15E-02  | 8,59E-01 | 9,95E-01 | Bloc1s4       | 1,01 | No  |
| ENSMUSG00000060715 | -1,88E+00 | -2,896101069 | 1,42E+00  | 2,33E-01 | 5,50E-01 | 1700019A02Rik | 0,27 | No  |
| ENSMUSG00000060716 | 1,44E-01  | 1,238553621  | 5,78E-01  | 4,47E-01 | 7,37E-01 | Plekhh1       | 1,10 | No  |
| ENSMUSG00000060727 | -4,06E-02 | 2,945086808  | 1,28E-01  | 7,21E-01 | 9,16E-01 | Gm12571       | 0,97 | No  |
| ENSMUSG00000060730 | -2,92E-01 | 1,045129324  | 2,15E+00  | 1,42E-01 | 4,77E-01 | Gm10086       | 0,82 | No  |
| ENSMUSG00000060733 | 1,26E-01  | 6,161299891  | 3,82E+00  | 5,05E-02 | 2,72E-01 | lpmk          | 1,09 | No  |
| ENSMUSG00000060739 | -5,37E-02 | 5,231279964  | 5,64E-01  | 4,53E-01 | 7,42E-01 | Nsa2          | 0,96 | No  |
| ENSMUSG00000060743 | 9,17E-02  | 6,615637327  | 2,18E+00  | 1,40E-01 | 4,73E-01 | H3f3a         | 1,07 | No  |
| ENSMUSG00000060771 | 2,44E-01  | 2,928977051  | 4,51E+00  | 3,37E-02 | 2,16E-01 | Tsga10        | 1,18 | No  |
| ENSMUSG00000060777 | 1,28E-01  | 0,237057732  | 2,02E-01  | 6,53E-01 | 8,78E-01 | Gm10087       | 1,09 | No  |
| ENSMUSG00000060791 | 2,18E-02  | 3,240204007  | 4,18E-02  | 8,38E-01 | 9,82E-01 | Gmfg          | 1,02 | No  |
| ENSMUSG00000060794 | 1,81E+00  | -3,10765737  | 1,28E+00  | 2,58E-01 | 5,50E-01 | Tssk5         | 3,49 | No  |
| ENSMUSG00000060795 | 2,75E-01  | 2,16736685   | 3,69E+00  | 5,47E-02 | 2,87E-01 | Gm13363       | 1,21 | No  |
| ENSMUSG00000060798 | -7,86E-02 | 1,758581118  | 2,34E-01  | 6,29E-01 | 8,62E-01 | Intu          | 0,95 | No  |
| ENSMUSG00000060802 | -1,38E-01 | 10,78981826  | 6,06E+00  | 1,38E-02 | 1,19E-01 | B2m           | 0,91 | No  |
| ENSMUSG00000060803 | -7,54E-03 | 2,52247852   | 3,36E-03  | 9,54E-01 | 1,00E+00 | Gstp1         | 0,99 | No  |
| ENSMUSG00000060860 | 1,64E-01  | 5,130269031  | 5,10E+00  | 2,40E-02 | 1,70E-01 | Ube2s         | 1,12 | No  |
| ENSMUSG00000060862 | 1,30E-01  | 4,48484542   | 2,62E+00  | 1,05E-01 | 3,97E-01 | Zbtb40        | 1,09 | No  |
| ENSMUSG00000060863 | 9,01E-03  | -3,107646452 | -5,16E-10 | 1,00E+00 | 1,00E+00 | Tcl1b2        | 1,01 | No  |
| ENSMUSG00000060878 | 4,81E-01  | -2,311213769 | 4,47E-01  | 5,04E-01 | 7,88E-01 | Olf1420       | 1,40 | No  |
| ENSMUSG00000060879 | 1,81E+00  | -3,10765737  | 1,28E+00  | 2,58E-01 | 5,50E-01 | Gm6564        | 3,49 | No  |
| ENSMUSG00000060904 | 1,57E-02  | 6,344173425  | 6,09E-02  | 8,05E-01 | 9,63E-01 | Arl1          | 1,01 | No  |
| ENSMUSG00000060923 | -3,50E-02 | -0,522615459 | 9,57E-03  | 9,22E-01 | 1,00E+00 | Acyp2         | 0,98 | No  |
| ENSMUSG00000060924 | -1,22E+00 | -2,49754544  | 1,43E+00  | 2,31E-01 | 5,50E-01 | Csmd1         | 0,43 | No  |
| ENSMUSG00000060935 | -5,92E-03 | 2,905616966  | 2,73E-03  | 9,58E-01 | 1,00E+00 | Tmem263       | 1,00 | No  |



|                    |           |              |          |          |          |           |      |     |
|--------------------|-----------|--------------|----------|----------|----------|-----------|------|-----|
| ENSMUSG00000060938 | -2,65E-01 | 5,834035174  | 1,60E+01 | 6,32E-05 | 1,66E-03 | Rpl26     | 0,83 | Yes |
| ENSMUSG00000060950 | 1,59E-01  | 2,944447018  | 1,98E+00 | 1,60E-01 | 5,07E-01 | Trmt61a   | 1,12 | No  |
| ENSMUSG00000060961 | -7,27E-01 | 1,285085041  | 1,61E+01 | 5,87E-05 | 1,56E-03 | Slc4a4    | 0,60 | Yes |
| ENSMUSG00000060962 | 7,35E-01  | -2,896163881 | 2,94E-01 | 5,87E-01 | 8,40E-01 | Dmkn      | 1,66 | No  |
| ENSMUSG00000060969 | -5,25E-02 | -3,033661434 | 4,08E-11 | 1,00E+00 | 1,00E+00 | Irx1      | 0,96 | No  |
| ENSMUSG00000060981 | -1,81E-01 | -1,18560079  | 1,18E-01 | 7,31E-01 | 9,22E-01 | Hist1h4h  | 0,88 | No  |
| ENSMUSG00000060985 | -3,45E-01 | -0,937763082 | 7,34E-01 | 3,92E-01 | 6,92E-01 | Tdrd5     | 0,79 | No  |
| ENSMUSG00000060989 | 5,79E-02  | 6,51348571   | 8,52E-01 | 3,56E-01 | 6,57E-01 | Gm11847   | 1,04 | No  |
| ENSMUSG00000060992 | -4,08E-02 | 7,117615278  | 4,58E-01 | 4,99E-01 | 7,84E-01 | Copz1     | 0,97 | No  |
| ENSMUSG00000061013 | -5,68E-01 | -1,770693239 | 7,05E-01 | 4,01E-01 | 6,99E-01 | Mkx       | 0,67 | No  |
| ENSMUSG00000061024 | 1,12E-01  | 5,230276951  | 2,41E+00 | 1,20E-01 | 4,32E-01 | Rrs1      | 1,08 | No  |
| ENSMUSG00000061028 | 1,45E-01  | 4,480190465  | 3,26E+00 | 7,11E-02 | 3,38E-01 | Clasrp    | 1,11 | No  |
| ENSMUSG00000061032 | 4,95E-03  | 6,650488602  | 6,37E-03 | 9,36E-01 | 1,00E+00 | Rrp1      | 1,00 | No  |
| ENSMUSG00000061039 | -7,36E-01 | 2,39051218   | 2,95E+01 | 5,49E-08 | 3,23E-06 | Olfr920   | 0,60 | Yes |
| ENSMUSG00000061046 | -1,05E-01 | 3,790640242  | 1,32E+00 | 2,51E-01 | 5,50E-01 | Haghl     | 0,93 | No  |
| ENSMUSG00000061048 | 5,71E-01  | -2,107731269 | 5,52E-01 | 4,58E-01 | 7,47E-01 | Cdh3      | 1,49 | No  |
| ENSMUSG00000061062 | -1,49E-01 | 6,495802374  | 5,68E+00 | 1,72E-02 | 1,37E-01 | Gm10093   | 0,90 | No  |
| ENSMUSG00000061079 | 1,66E-01  | 4,006123064  | 3,58E+00 | 5,86E-02 | 2,99E-01 | Zfp143    | 1,12 | No  |
| ENSMUSG00000061086 | -6,90E-01 | -1,963284695 | 1,09E+00 | 2,97E-01 | 5,93E-01 | Myl4      | 0,62 | No  |
| ENSMUSG00000061099 | -4,77E-01 | 0,087474163  | 2,99E+00 | 8,39E-02 | 3,71E-01 | Gapdhs    | 0,72 | No  |
| ENSMUSG00000061100 | -1,86E+00 | -0,669111663 | 2,07E+01 | 5,41E-06 | 1,95E-04 | Retnla    | 0,27 | Yes |
| ENSMUSG00000061104 | -3,26E-02 | 5,93742532   | 2,44E-01 | 6,21E-01 | 8,57E-01 | Sap18b    | 0,98 | No  |
| ENSMUSG00000061111 | -2,41E-02 | 5,429949622  | 1,21E-01 | 7,28E-01 | 9,20E-01 | Mcrip1    | 0,98 | No  |
| ENSMUSG00000061115 | 1,40E-01  | -2,146084808 | 3,41E-02 | 8,54E-01 | 9,91E-01 | Gm17113   | 1,10 | No  |
| ENSMUSG00000061118 | -3,36E-02 | 3,773113205  | 1,32E-01 | 7,17E-01 | 9,13E-01 | Dnajc30   | 0,98 | No  |
| ENSMUSG00000061119 | -7,42E-02 | 7,843287099  | 1,61E+00 | 2,04E-01 | 5,50E-01 | Prcp      | 0,95 | No  |
| ENSMUSG00000061126 | -2,29E-01 | -1,800893725 | 1,16E-01 | 7,33E-01 | 9,23E-01 | Cyp4f39   | 0,85 | No  |
| ENSMUSG00000061130 | -4,86E-02 | 5,645681916  | 5,14E-01 | 4,73E-01 | 7,62E-01 | Ppm1b     | 0,97 | No  |
| ENSMUSG00000061132 | 6,36E-04  | 4,918589997  | 7,26E-05 | 9,93E-01 | 1,00E+00 | Blnk      | 1,00 | No  |
| ENSMUSG00000061136 | 5,00E-02  | 6,766789241  | 6,57E-01 | 4,18E-01 | 7,12E-01 | Prpf40a   | 1,04 | No  |
| ENSMUSG00000061143 | 3,93E-01  | 3,054853891  | 1,19E+01 | 5,74E-04 | 1,03E-02 | Maml3     | 1,31 | Yes |
| ENSMUSG00000061167 | -2,26E-01 | 7,410498996  | 1,45E+01 | 1,43E-04 | 3,26E-03 | Rpl15-ps3 | 0,85 | Yes |

|                    |           |              |          |          |          |          |      |     |
|--------------------|-----------|--------------|----------|----------|----------|----------|------|-----|
| ENSMUSG00000061171 | 2,62E+00  | -3,033654625 | 2,66E+00 | 1,03E-01 | 3,95E-01 | Slc38a11 | 6,16 | No  |
| ENSMUSG00000061175 | 2,32E-01  | 7,500369952  | 1,53E+01 | 9,21E-05 | 2,26E-03 | Fnip2    | 1,17 | Yes |
| ENSMUSG00000061186 | 2,00E-01  | 1,347951296  | 1,17E+00 | 2,79E-01 | 5,75E-01 | Sfmbt2   | 1,15 | No  |
| ENSMUSG00000061207 | -1,16E-01 | 5,103468316  | 2,56E+00 | 1,09E-01 | 4,05E-01 | Stk19    | 0,92 | No  |
| ENSMUSG00000061232 | -2,51E-01 | 10,0179342   | 2,00E+01 | 7,92E-06 | 2,73E-04 | H2-K1    | 0,84 | Yes |
| ENSMUSG00000061242 | -6,37E-02 | 3,844929411  | 4,91E-01 | 4,83E-01 | 7,71E-01 | Gm9104   | 0,96 | No  |
| ENSMUSG00000061244 | 1,03E-01  | 6,556927142  | 2,71E+00 | 1,00E-01 | 3,92E-01 | Exoc5    | 1,07 | No  |
| ENSMUSG00000061272 | -1,63E-01 | 0,755814722  | 5,35E-01 | 4,65E-01 | 7,53E-01 | Gm14173  | 0,89 | No  |
| ENSMUSG00000061286 | 9,07E-02  | 4,659740629  | 1,35E+00 | 2,45E-01 | 5,50E-01 | Exosc5   | 1,06 | No  |
| ENSMUSG00000061288 | 7,21E-02  | 7,362927997  | 1,46E+00 | 2,27E-01 | 5,50E-01 | Taok3    | 1,05 | No  |
| ENSMUSG00000061306 | 1,01E-01  | 7,452883754  | 2,89E+00 | 8,90E-02 | 3,79E-01 | Slc38a10 | 1,07 | No  |
| ENSMUSG00000061311 | -3,45E-01 | -2,497598046 | 1,50E-01 | 6,99E-01 | 9,04E-01 | Rag1     | 0,79 | No  |
| ENSMUSG00000061313 | 9,80E-02  | 5,700962827  | 2,12E+00 | 1,46E-01 | 4,83E-01 | Ddhd2    | 1,07 | No  |
| ENSMUSG00000061315 | -2,84E-01 | 3,964991191  | 1,02E+01 | 1,41E-03 | 2,12E-02 | Naca     | 0,82 | Yes |
| ENSMUSG00000061322 | -4,11E-02 | -1,627679893 | 5,88E-03 | 9,39E-01 | 1,00E+00 | Dnaic1   | 0,97 | No  |
| ENSMUSG00000061330 | 2,15E-01  | -1,428864787 | 1,97E-01 | 6,57E-01 | 8,80E-01 | Gm11361  | 1,16 | No  |
| ENSMUSG00000061331 | 6,95E-01  | -2,770658518 | 2,64E-01 | 6,07E-01 | 8,50E-01 | Gm17132  | 1,62 | No  |
| ENSMUSG00000061336 | 9,50E-01  | -0,648424254 | 6,65E+00 | 9,91E-03 | 9,26E-02 | Olf116   | 1,93 | No  |
| ENSMUSG00000061353 | -4,56E-01 | -0,816346778 | 1,44E+00 | 2,30E-01 | 5,50E-01 | Cxcl12   | 0,73 | No  |
| ENSMUSG00000061356 | 2,59E+00  | -2,963287563 | 2,60E+00 | 1,07E-01 | 3,99E-01 | Nuggc    | 6,03 | No  |
| ENSMUSG00000061360 | -1,35E-01 | 5,141538017  | 3,45E+00 | 6,31E-02 | 3,13E-01 | Phf5a    | 0,91 | No  |
| ENSMUSG00000061371 | -2,33E-01 | 1,685754524  | 2,13E+00 | 1,45E-01 | 4,81E-01 | Zfp873   | 0,85 | No  |
| ENSMUSG00000061374 | 4,87E-02  | 4,808308457  | 4,06E-01 | 5,24E-01 | 8,01E-01 | Fiz1     | 1,03 | No  |
| ENSMUSG00000061390 | -1,62E-01 | 5,605683423  | 5,63E+00 | 1,76E-02 | 1,39E-01 | Gm7866   | 0,89 | No  |
| ENSMUSG00000061393 | 1,91E-01  | 1,473875284  | 1,17E+00 | 2,78E-01 | 5,75E-01 | Acvr2b   | 1,14 | No  |
| ENSMUSG00000061397 | -8,01E-01 | -2,711640323 | 3,54E-01 | 5,52E-01 | 8,18E-01 | Krt79    | 0,57 | No  |
| ENSMUSG00000061410 | 5,55E-01  | 0,809296067  | 5,92E+00 | 1,50E-02 | 1,26E-01 | Zcchc14  | 1,47 | No  |
| ENSMUSG00000061411 | -8,95E-02 | 5,493585925  | 1,66E+00 | 1,97E-01 | 5,50E-01 | Nol4l    | 0,94 | No  |
| ENSMUSG00000061414 | -1,30E-02 | 3,74482191   | 1,90E-02 | 8,90E-01 | 1,00E+00 | Cracr2a  | 0,99 | No  |
| ENSMUSG00000061436 | 1,53E-02  | 7,06730803   | 6,36E-02 | 8,01E-01 | 9,61E-01 | Hipk2    | 1,01 | No  |
| ENSMUSG00000061451 | 6,45E-02  | 3,866512123  | 4,95E-01 | 4,82E-01 | 7,69E-01 | Tmem151a | 1,05 | No  |
| ENSMUSG00000061455 | -1,27E-02 | 4,969999523  | 2,94E-02 | 8,64E-01 | 9,97E-01 | Stx17    | 0,99 | No  |

|                    |           |              |          |          |          |               |      |     |
|--------------------|-----------|--------------|----------|----------|----------|---------------|------|-----|
| ENSMUSG00000061458 | 1,19E-01  | 3,58007981   | 1,50E+00 | 2,21E-01 | 5,50E-01 | Nol10         | 1,09 | No  |
| ENSMUSG00000061461 | -1,54E-01 | 4,676977142  | 3,88E+00 | 4,88E-02 | 2,66E-01 | Smim20        | 0,90 | No  |
| ENSMUSG00000061462 | -4,59E-01 | -1,497515715 | 7,82E-01 | 3,76E-01 | 6,77E-01 | Obscn         | 0,73 | No  |
| ENSMUSG00000061474 | -3,00E-01 | 2,420291712  | 4,97E+00 | 2,58E-02 | 1,79E-01 | Mrps36        | 0,81 | No  |
| ENSMUSG00000061477 | -2,29E-01 | 4,316400433  | 7,53E+00 | 6,08E-03 | 6,48E-02 | Rps7          | 0,85 | No  |
| ENSMUSG00000061479 | 8,71E-02  | 4,89039588   | 1,33E+00 | 2,50E-01 | 5,50E-01 | Snrpa         | 1,06 | No  |
| ENSMUSG00000061482 | -2,44E-01 | -0,963224995 | 3,41E-01 | 5,59E-01 | 8,22E-01 | Hist1h4d      | 0,84 | No  |
| ENSMUSG00000061486 | -1,08E-01 | 1,581397803  | 4,12E-01 | 5,21E-01 | 8,00E-01 | Gm5161        | 0,93 | No  |
| ENSMUSG00000061488 | -2,76E-01 | -0,117170624 | 7,58E-01 | 3,84E-01 | 6,85E-01 | Rpl27a-ps1    | 0,83 | No  |
| ENSMUSG00000061490 | 1,36E+00  | -2,226331283 | 1,90E+00 | 1,68E-01 | 5,23E-01 | Ube2d4        | 2,57 | No  |
| ENSMUSG00000061510 | -9,57E-01 | -1,098049784 | 4,04E+00 | 4,43E-02 | 2,51E-01 | Gm10101       | 0,52 | No  |
| ENSMUSG00000061518 | -2,70E-02 | 3,739450005  | 8,24E-02 | 7,74E-01 | 9,45E-01 | Cox5b         | 0,98 | No  |
| ENSMUSG00000061524 | 2,99E-01  | -2,600699326 | 9,12E-02 | 7,63E-01 | 9,38E-01 | Zic2          | 1,23 | No  |
| ENSMUSG00000061525 | -1,14E-02 | -3,033635021 | 1,50E-05 | 9,97E-01 | 1,00E+00 | 4921509C19Rik | 0,99 | No  |
| ENSMUSG00000061527 | -1,94E+00 | -3,107619243 | 1,50E+00 | 2,21E-01 | 5,50E-01 | Krt5          | 0,26 | No  |
| ENSMUSG00000061531 | 4,62E-01  | -1,355514107 | 7,11E-01 | 3,99E-01 | 6,98E-01 | Tmem236       | 1,38 | No  |
| ENSMUSG00000061533 | 1,56E-01  | 4,458016781  | 3,69E+00 | 5,48E-02 | 2,87E-01 | Cep128        | 1,11 | No  |
| ENSMUSG00000061536 | 2,46E-01  | 4,7603571    | 1,03E+01 | 1,37E-03 | 2,07E-02 | Sec22c        | 1,19 | Yes |
| ENSMUSG00000061540 | -1,28E-01 | 1,680621096  | 6,35E-01 | 4,26E-01 | 7,20E-01 | Orm2          | 0,91 | No  |
| ENSMUSG00000061544 | -1,32E-01 | 1,541857377  | 6,33E-01 | 4,26E-01 | 7,21E-01 | Zfp229        | 0,91 | No  |
| ENSMUSG00000061559 | -1,12E-01 | 4,489643199  | 1,93E+00 | 1,65E-01 | 5,17E-01 | Wdr61         | 0,93 | No  |
| ENSMUSG00000061561 | 1,26E+00  | -2,770612189 | 9,82E-01 | 3,22E-01 | 6,22E-01 | Olfr373       | 2,39 | No  |
| ENSMUSG00000061576 | -3,57E-01 | -1,548165455 | 4,59E-01 | 4,98E-01 | 7,83E-01 | Dpp6          | 0,78 | No  |
| ENSMUSG00000061577 | 1,88E-01  | 3,527692644  | 3,64E+00 | 5,63E-02 | 2,91E-01 | Adgrg5        | 1,14 | No  |
| ENSMUSG00000061578 | 4,29E-01  | 4,044109071  | 2,28E+01 | 1,84E-06 | 7,56E-05 | Ksr2          | 1,35 | Yes |
| ENSMUSG00000061589 | 9,03E-02  | 6,249048798  | 1,98E+00 | 1,59E-01 | 5,06E-01 | Dot1l         | 1,06 | No  |
| ENSMUSG00000061603 | 4,70E-01  | 0,997535234  | 4,96E+00 | 2,59E-02 | 1,79E-01 | Akap6         | 1,38 | No  |
| ENSMUSG00000061607 | 1,84E-01  | 5,871238189  | 7,74E+00 | 5,41E-03 | 5,93E-02 | Mdc1          | 1,14 | No  |
| ENSMUSG00000061613 | 6,69E-02  | 3,524558191  | 4,66E-01 | 4,95E-01 | 7,80E-01 | U2af1         | 1,05 | No  |
| ENSMUSG00000061615 | 1,63E+00  | -1,816504062 | 5,82E+00 | 1,59E-02 | 1,31E-01 | Hist1h2ab     | 3,10 | No  |
| ENSMUSG00000061616 | 1,86E+00  | -2,963277112 | 1,35E+00 | 2,46E-01 | 5,50E-01 | Olfr12        | 3,62 | No  |
| ENSMUSG00000061619 | 2,40E-01  | 1,644323391  | 2,01E+00 | 1,56E-01 | 5,00E-01 | Vma21-ps      | 1,18 | No  |

|                    |           |              |           |          |          |           |      |     |
|--------------------|-----------|--------------|-----------|----------|----------|-----------|------|-----|
| ENSMUSG00000061650 | 1,15E-01  | 4,661950531  | 2,18E+00  | 1,40E-01 | 4,72E-01 | Med9      | 1,08 | No  |
| ENSMUSG00000061665 | -6,30E-03 | 6,021975822  | 9,34E-03  | 9,23E-01 | 1,00E+00 | Cd2ap     | 1,00 | No  |
| ENSMUSG00000061666 | -9,31E-02 | 3,300621401  | 7,82E-01  | 3,77E-01 | 6,78E-01 | Gdpd1     | 0,94 | No  |
| ENSMUSG00000061669 | -1,22E-01 | 2,842564104  | 1,10E+00  | 2,93E-01 | 5,89E-01 | Rpl34-ps2 | 0,92 | No  |
| ENSMUSG00000061684 | -9,66E-02 | 4,165995932  | 1,27E+00  | 2,60E-01 | 5,53E-01 | Rpl21-ps8 | 0,94 | No  |
| ENSMUSG00000061689 | 2,92E-03  | 6,150435897  | 2,06E-03  | 9,64E-01 | 1,00E+00 | Dlgap4    | 1,00 | No  |
| ENSMUSG00000061701 | -3,83E-02 | -3,107651936 | -7,91E-11 | 1,00E+00 | 1,00E+00 | Fbxw20    | 0,97 | No  |
| ENSMUSG00000061702 | -2,38E-01 | -0,378293422 | 4,47E-01  | 5,04E-01 | 7,88E-01 | Tmem91    | 0,85 | No  |
| ENSMUSG00000061718 | 1,86E+00  | -2,963277112 | 1,35E+00  | 2,46E-01 | 5,50E-01 | Ppp1r1b   | 3,62 | No  |
| ENSMUSG00000061723 | 2,11E-01  | 2,75327032   | 2,96E+00  | 8,51E-02 | 3,75E-01 | Tnnt3     | 1,16 | No  |
| ENSMUSG00000061724 | -9,26E-04 | 5,691480866  | 1,88E-04  | 9,89E-01 | 1,00E+00 | Gm2423    | 1,00 | No  |
| ENSMUSG00000061728 | -1,19E+00 | -2,548203955 | 1,83E+00  | 1,77E-01 | 5,36E-01 | Btnl7-ps  | 0,44 | No  |
| ENSMUSG00000061731 | -2,86E-01 | 5,557073725  | 1,75E+01  | 2,83E-05 | 8,36E-04 | Ext1      | 0,82 | Yes |
| ENSMUSG00000061740 | -1,89E+00 | -3,1076441   | 1,42E+00  | 2,33E-01 | 5,50E-01 | Cyp2d22   | 0,27 | No  |
| ENSMUSG00000061751 | 3,58E-01  | 1,480165235  | 4,28E+00  | 3,85E-02 | 2,33E-01 | Kalrn     | 1,28 | No  |
| ENSMUSG00000061755 | 1,11E-01  | 6,103079549  | 2,97E+00  | 8,47E-02 | 3,73E-01 | Bod1l     | 1,08 | No  |
| ENSMUSG00000061758 | -1,97E-02 | 4,539788979  | 6,04E-02  | 8,06E-01 | 9,63E-01 | Akr1b10   | 0,99 | No  |
| ENSMUSG00000061759 | 9,20E-02  | 4,90486506   | 1,51E+00  | 2,19E-01 | 5,50E-01 | Armt1     | 1,07 | No  |
| ENSMUSG00000061787 | -1,51E-01 | 5,522779663  | 4,83E+00  | 2,79E-02 | 1,89E-01 | Rps17     | 0,90 | No  |
| ENSMUSG00000061802 | -2,80E-01 | -1,740882057 | 2,55E-01  | 6,13E-01 | 8,53E-01 | Armc4     | 0,82 | No  |
| ENSMUSG00000061808 | 3,14E-02  | -3,107617333 | -7,69E-10 | 1,00E+00 | 1,00E+00 | Ttr       | 1,02 | No  |
| ENSMUSG00000061809 | 6,65E-01  | -2,896156246 | 2,39E-01  | 6,25E-01 | 8,59E-01 | Tbpl2     | 1,59 | No  |
| ENSMUSG00000061815 | 9,84E-04  | -0,300098264 | 8,93E-06  | 9,98E-01 | 1,00E+00 | Rufy4     | 1,00 | No  |
| ENSMUSG00000061825 | 9,93E-01  | -1,847796402 | 1,92E+00  | 1,65E-01 | 5,18E-01 | Ces2c     | 1,99 | No  |
| ENSMUSG00000061833 | -3,88E-02 | 5,942938728  | 3,47E-01  | 5,56E-01 | 8,21E-01 | Gm6311    | 0,97 | No  |
| ENSMUSG00000061838 | -1,69E-02 | 2,742273961  | 1,93E-02  | 8,89E-01 | 1,00E+00 | Suclg2    | 0,99 | No  |
| ENSMUSG00000061848 | -2,12E-01 | 7,568320704  | 1,29E+01  | 3,31E-04 | 6,56E-03 | Gm5805    | 0,86 | Yes |
| ENSMUSG00000061852 | 8,06E-02  | 0,863674047  | 1,42E-01  | 7,06E-01 | 9,08E-01 | Gm7582    | 1,06 | No  |
| ENSMUSG00000061859 | -1,64E-03 | 0,214047742  | 4,10E-05  | 9,95E-01 | 1,00E+00 | Patj      | 1,00 | No  |
| ENSMUSG00000061863 | -4,27E-01 | -2,497604114 | 1,87E-01  | 6,66E-01 | 8,85E-01 | Gm6822    | 0,74 | No  |
| ENSMUSG00000061878 | 2,18E-01  | 3,842498832  | 5,65E+00  | 1,74E-02 | 1,38E-01 | Sphk1     | 1,16 | No  |
| ENSMUSG00000061882 | 1,72E-01  | 0,768408908  | 5,87E-01  | 4,44E-01 | 7,35E-01 | Ccdc62    | 1,13 | No  |

|                    |           |              |          |          |          |            |      |     |
|--------------------|-----------|--------------|----------|----------|----------|------------|------|-----|
| ENSMUSG00000061887 | -1,51E-01 | 3,991483463  | 2,91E+00 | 8,80E-02 | 3,79E-01 | Ssbp3      | 0,90 | No  |
| ENSMUSG00000061894 | -2,13E-01 | 2,569056738  | 3,01E+00 | 8,30E-02 | 3,70E-01 | Zscan20    | 0,86 | No  |
| ENSMUSG00000061897 | -1,63E-01 | 5,052542642  | 4,97E+00 | 2,59E-02 | 1,79E-01 | Gm14292    | 0,89 | No  |
| ENSMUSG00000061898 | 7,89E-02  | 3,919050276  | 7,65E-01 | 3,82E-01 | 6,83E-01 | Rbak       | 1,06 | No  |
| ENSMUSG00000061904 | -2,45E-04 | 8,540139476  | 1,83E-05 | 9,97E-01 | 1,00E+00 | Slc25a3    | 1,00 | No  |
| ENSMUSG00000061911 | -2,66E+00 | -3,033639428 | 2,81E+00 | 9,35E-02 | 3,83E-01 | Myt1l      | 0,16 | No  |
| ENSMUSG00000061928 | -1,89E+00 | -3,1076441   | 1,42E+00 | 2,33E-01 | 5,50E-01 | Dsg1b      | 0,27 | No  |
| ENSMUSG00000061950 | 8,85E-02  | 5,996658462  | 1,83E+00 | 1,76E-01 | 5,35E-01 | Ppp4r1     | 1,06 | No  |
| ENSMUSG00000061969 | -1,37E+00 | -2,89609265  | 1,18E+00 | 2,78E-01 | 5,74E-01 | Gm5581     | 0,39 | No  |
| ENSMUSG00000061972 | -1,62E-01 | 0,372240442  | 4,22E-01 | 5,16E-01 | 7,97E-01 | Olf99      | 0,89 | No  |
| ENSMUSG00000061979 | -5,95E-02 | 3,458716948  | 3,48E-01 | 5,55E-01 | 8,20E-01 | Rcc1l      | 0,96 | No  |
| ENSMUSG00000061981 | 3,41E-03  | 6,827197614  | 3,09E-03 | 9,56E-01 | 1,00E+00 | Flot2      | 1,00 | No  |
| ENSMUSG00000061983 | -1,37E-01 | 4,145412185  | 2,51E+00 | 1,13E-01 | 4,14E-01 | Rps12      | 0,91 | No  |
| ENSMUSG00000061988 | 1,89E-01  | -1,800986829 | 9,98E-02 | 7,52E-01 | 9,32E-01 | Rpl10a-ps2 | 1,14 | No  |
| ENSMUSG00000061991 | -3,33E-01 | -2,600661269 | 8,11E-02 | 7,76E-01 | 9,45E-01 | Hist1h2af  | 0,79 | No  |
| ENSMUSG00000061992 | -8,57E-02 | -2,070200636 | 1,36E-02 | 9,07E-01 | 1,00E+00 | Gm4953     | 0,94 | No  |
| ENSMUSG00000062006 | -3,12E-01 | 3,995433346  | 1,25E+01 | 4,02E-04 | 7,65E-03 | Rpl34      | 0,81 | Yes |
| ENSMUSG00000062007 | -2,56E-01 | 1,536178583  | 2,46E+00 | 1,17E-01 | 4,23E-01 | Hsh2d      | 0,84 | No  |
| ENSMUSG00000062012 | 4,93E-01  | -0,896367153 | 1,44E+00 | 2,29E-01 | 5,50E-01 | Zfp13      | 1,41 | No  |
| ENSMUSG00000062014 | 1,46E-01  | 7,087203236  | 5,86E+00 | 1,55E-02 | 1,29E-01 | Gmfb       | 1,11 | No  |
| ENSMUSG00000062028 | 5,00E-01  | 4,029567071  | 3,12E+01 | 2,35E-08 | 1,51E-06 | Irgc1      | 1,41 | Yes |
| ENSMUSG00000062031 | 1,99E-01  | 3,648277175  | 4,36E+00 | 3,68E-02 | 2,28E-01 | Pgghg      | 1,15 | No  |
| ENSMUSG00000062038 | 3,78E-02  | 4,683122825  | 2,34E-01 | 6,29E-01 | 8,62E-01 | Gm10108    | 1,03 | No  |
| ENSMUSG00000062040 | 4,52E-01  | 2,603952723  | 1,31E+01 | 2,94E-04 | 5,97E-03 | Zfp27      | 1,37 | Yes |
| ENSMUSG00000062044 | -2,15E-01 | -2,311134572 | 5,57E-02 | 8,13E-01 | 9,68E-01 | Lmtk3      | 0,86 | No  |
| ENSMUSG00000062054 | 1,20E-01  | 5,231437385  | 2,80E+00 | 9,41E-02 | 3,84E-01 | lah1       | 1,09 | No  |
| ENSMUSG00000062061 | -2,71E+00 | -3,033620915 | 2,92E+00 | 8,75E-02 | 3,78E-01 | Obp2a      | 0,15 | No  |
| ENSMUSG00000062064 | 1,21E-02  | -3,033650469 | 7,34E-11 | 1,00E+00 | 1,00E+00 | Slc2a7     | 1,01 | No  |
| ENSMUSG00000062073 | 1,17E+00  | -0,355735301 | 1,00E+01 | 1,53E-03 | 2,27E-02 | Gm10109    | 2,24 | Yes |
| ENSMUSG00000062074 | -1,69E-01 | -1,60057942  | 8,97E-02 | 7,64E-01 | 9,39E-01 | Wisp3      | 0,89 | No  |
| ENSMUSG00000062075 | 2,26E-01  | 5,29268384   | 1,01E+01 | 1,51E-03 | 2,24E-02 | Lmnb2      | 1,17 | Yes |
| ENSMUSG00000062077 | 2,01E+00  | -2,71176413  | 3,10E+00 | 7,81E-02 | 3,57E-01 | Trim54     | 4,02 | No  |

|                    |           |              |          |          |          |               |      |     |
|--------------------|-----------|--------------|----------|----------|----------|---------------|------|-----|
| ENSMUSG00000062078 | 1,77E-01  | 7,623451373  | 9,04E+00 | 2,64E-03 | 3,47E-02 | Qk            | 1,13 | Yes |
| ENSMUSG00000062081 | -4,60E-02 | 6,041897528  | 4,95E-01 | 4,82E-01 | 7,69E-01 | Gm6055        | 0,97 | No  |
| ENSMUSG00000062082 | 3,29E-01  | 7,710390958  | 3,10E+01 | 2,54E-08 | 1,62E-06 | Cd200r4       | 1,26 | Yes |
| ENSMUSG00000062083 | -2,09E-01 | 6,361913989  | 1,08E+01 | 1,01E-03 | 1,63E-02 | Rpl13a-ps1    | 0,87 | Yes |
| ENSMUSG00000062093 | -5,22E-02 | 5,848518505  | 6,16E-01 | 4,33E-01 | 7,26E-01 | Gm10110       | 0,96 | No  |
| ENSMUSG00000062098 | 1,74E-01  | 3,18918159   | 2,65E+00 | 1,04E-01 | 3,95E-01 | Btbd3         | 1,13 | No  |
| ENSMUSG00000062101 | -4,27E-03 | 1,480198964  | 5,92E-04 | 9,81E-01 | 1,00E+00 | Zfp119b       | 1,00 | No  |
| ENSMUSG00000062110 | 4,88E-02  | 4,006358151  | 3,02E-01 | 5,83E-01 | 8,38E-01 | Scfd2         | 1,03 | No  |
| ENSMUSG00000062115 | 1,33E-01  | 6,459648149  | 4,50E+00 | 3,38E-02 | 2,16E-01 | Rai1          | 1,10 | No  |
| ENSMUSG00000062116 | -5,96E-02 | 3,687241858  | 3,97E-01 | 5,29E-01 | 8,04E-01 | Zfp954        | 0,96 | No  |
| ENSMUSG00000062127 | 7,70E-02  | 6,016274009  | 1,39E+00 | 2,39E-01 | 5,50E-01 | Cttnbp2nl     | 1,05 | No  |
| ENSMUSG00000062132 | 1,17E+00  | -3,14612376  | 6,40E-01 | 4,24E-01 | 7,18E-01 | Arhgap33os    | 2,26 | No  |
| ENSMUSG00000062148 | 2,84E-01  | 3,959000715  | 9,78E+00 | 1,76E-03 | 2,52E-02 | Ear6          | 1,22 | Yes |
| ENSMUSG00000062151 | 1,81E+00  | -3,10765737  | 1,28E+00 | 2,58E-01 | 5,50E-01 | Unc13c        | 3,49 | No  |
| ENSMUSG00000062152 | -1,41E+00 | -1,497409473 | 5,68E+00 | 1,71E-02 | 1,37E-01 | Rpl21-ps14    | 0,38 | No  |
| ENSMUSG00000062157 | -6,94E-01 | 2,333026741  | 2,82E+01 | 1,10E-07 | 6,09E-06 | lfnlr1        | 0,62 | Yes |
| ENSMUSG00000062169 | -5,67E-03 | 4,51000109   | 4,98E-03 | 9,44E-01 | 1,00E+00 | Cnih4         | 1,00 | No  |
| ENSMUSG00000062175 | -4,69E-01 | 1,266118257  | 6,48E+00 | 1,09E-02 | 9,96E-02 | Tgif2         | 0,72 | No  |
| ENSMUSG00000062190 | 5,94E-02  | 3,892163032  | 4,33E-01 | 5,11E-01 | 7,94E-01 | Lancl2        | 1,04 | No  |
| ENSMUSG00000062198 | 8,68E-02  | 2,303889089  | 4,22E-01 | 5,16E-01 | 7,97E-01 | 2700097009Rik | 1,06 | No  |
| ENSMUSG00000062202 | -7,13E-02 | 5,458392745  | 1,05E+00 | 3,05E-01 | 6,02E-01 | Btbd9         | 0,95 | No  |
| ENSMUSG00000062203 | 3,12E-02  | 6,933869348  | 2,61E-01 | 6,09E-01 | 8,51E-01 | Gspt1         | 1,02 | No  |
| ENSMUSG00000062204 | -4,28E-01 | -1,401295251 | 5,31E-01 | 4,66E-01 | 7,54E-01 | Olfir1373     | 0,74 | No  |
| ENSMUSG00000062210 | -1,71E-01 | 6,678306444  | 7,69E+00 | 5,55E-03 | 6,04E-02 | Tnfaip8       | 0,89 | No  |
| ENSMUSG00000062232 | 1,38E-02  | 5,249388279  | 3,68E-02 | 8,48E-01 | 9,88E-01 | Rapgef2       | 1,01 | No  |
| ENSMUSG00000062234 | 6,89E-02  | 7,506635886  | 1,35E+00 | 2,45E-01 | 5,50E-01 | Gak           | 1,05 | No  |
| ENSMUSG00000062235 | -5,78E-02 | -2,896167382 | 2,23E-03 | 9,62E-01 | 1,00E+00 | Gm5341        | 0,96 | No  |
| ENSMUSG00000062248 | 1,58E-01  | 3,447687375  | 2,47E+00 | 1,16E-01 | 4,22E-01 | Cks2          | 1,12 | No  |
| ENSMUSG00000062257 | -1,90E+00 | -3,033647263 | 1,44E+00 | 2,30E-01 | 5,50E-01 | Opcml         | 0,27 | No  |
| ENSMUSG00000062270 | -9,27E-03 | 5,653714188  | 1,87E-02 | 8,91E-01 | 1,00E+00 | Morf4l1       | 0,99 | No  |
| ENSMUSG00000062279 | -7,60E-01 | -0,528828629 | 4,16E+00 | 4,13E-02 | 2,41E-01 | Gm10237       | 0,59 | No  |
| ENSMUSG00000062284 | -2,66E-01 | 2,972289971  | 5,41E+00 | 2,00E-02 | 1,51E-01 | Gm6030        | 0,83 | No  |

|                    |           |              |           |          |          |          |      |     |
|--------------------|-----------|--------------|-----------|----------|----------|----------|------|-----|
| ENSMUSG00000062296 | -1,49E+00 | -2,497512835 | 2,30E+00  | 1,30E-01 | 4,52E-01 | Trank1   | 0,36 | No  |
| ENSMUSG00000062300 | -1,76E-01 | 5,101670306  | 5,96E+00  | 1,46E-02 | 1,24E-01 | Nectin2  | 0,89 | No  |
| ENSMUSG00000062309 | 6,35E-01  | 1,090954446  | 9,36E+00  | 2,22E-03 | 3,03E-02 | Rpp25    | 1,55 | Yes |
| ENSMUSG00000062310 | -3,40E-01 | 0,783949013  | 2,54E+00  | 1,11E-01 | 4,09E-01 | Glrp1    | 0,79 | No  |
| ENSMUSG00000062312 | -1,02E+00 | -1,785671985 | 2,12E+00  | 1,45E-01 | 4,83E-01 | Erbp2    | 0,49 | No  |
| ENSMUSG00000062327 | 9,01E-03  | -3,107646452 | -5,16E-10 | 1,00E+00 | 1,00E+00 | T        | 1,01 | No  |
| ENSMUSG00000062328 | -1,80E-01 | 4,225504527  | 4,53E+00  | 3,32E-02 | 2,14E-01 | Rpl17    | 0,88 | No  |
| ENSMUSG00000062345 | -1,45E+00 | 4,26136652   | 2,70E+02  | 1,20E-60 | 6,00E-57 | Serpinb2 | 0,36 | Yes |
| ENSMUSG00000062352 | 1,20E-01  | 5,064604754  | 2,69E+00  | 1,01E-01 | 3,93E-01 | Itgb1bp1 | 1,09 | No  |
| ENSMUSG00000062353 | -1,70E-01 | 8,507981838  | 8,76E+00  | 3,07E-03 | 3,90E-02 | Gm15772  | 0,89 | Yes |
| ENSMUSG00000062365 | -1,69E+00 | -2,401298528 | 3,15E+00  | 7,61E-02 | 3,52E-01 | Gm4968   | 0,31 | No  |
| ENSMUSG00000062372 | -6,31E-01 | -1,740837581 | 1,00E+00  | 3,16E-01 | 6,17E-01 | Otof     | 0,65 | No  |
| ENSMUSG00000062373 | 2,59E-01  | 6,913939989  | 1,80E+01  | 2,24E-05 | 6,88E-04 | Tmem65   | 1,20 | Yes |
| ENSMUSG00000062376 | 7,00E-02  | 3,122269287  | 4,14E-01  | 5,20E-01 | 7,99E-01 | Borcs7   | 1,05 | No  |
| ENSMUSG00000062380 | 7,05E-01  | -0,785894315 | 3,30E+00  | 6,94E-02 | 3,32E-01 | Tubb3    | 1,63 | No  |
| ENSMUSG00000062382 | 5,03E-02  | 11,16989362  | 8,11E-01  | 3,68E-01 | 6,69E-01 | Ftl1-ps1 | 1,04 | No  |
| ENSMUSG00000062397 | 4,39E-02  | 6,52299941   | 4,92E-01  | 4,83E-01 | 7,70E-01 | Zfp706   | 1,03 | No  |
| ENSMUSG00000062410 | -3,83E-02 | -3,107651936 | -7,91E-11 | 1,00E+00 | 1,00E+00 | Hsd3b3   | 0,97 | No  |
| ENSMUSG00000062421 | 7,75E-02  | 5,463332027  | 1,25E+00  | 2,64E-01 | 5,59E-01 | Arf2     | 1,06 | No  |
| ENSMUSG00000062432 | -5,56E-01 | -2,71172308  | 2,42E-01  | 6,23E-01 | 8,58E-01 | Cyp26c1  | 0,68 | No  |
| ENSMUSG00000062438 | 4,09E-01  | -0,954629677 | 9,13E-01  | 3,39E-01 | 6,40E-01 | Adam1b   | 1,33 | No  |
| ENSMUSG00000062456 | -2,21E-01 | 7,803019819  | 1,43E+01  | 1,59E-04 | 3,57E-03 | Rpl9-ps6 | 0,86 | Yes |
| ENSMUSG00000062458 | -8,41E-02 | 4,789806227  | 1,21E+00  | 2,71E-01 | 5,67E-01 | Gm8623   | 0,94 | No  |
| ENSMUSG00000062461 | -2,01E-01 | 5,74770076   | 9,02E+00  | 2,67E-03 | 3,50E-02 | Gm5453   | 0,87 | Yes |
| ENSMUSG00000062464 | 2,27E-02  | 2,111239891  | 2,42E-02  | 8,76E-01 | 1,00E+00 | Cyp4f37  | 1,02 | No  |
| ENSMUSG00000062470 | -7,80E-02 | -0,300307193 | 5,81E-02  | 8,10E-01 | 9,65E-01 | Fbxl12os | 0,95 | No  |
| ENSMUSG00000062472 | 4,78E-01  | -2,401424486 | 3,10E-01  | 5,78E-01 | 8,35E-01 | Gm4945   | 1,39 | No  |
| ENSMUSG00000062477 | -3,83E-02 | -3,107651936 | -7,91E-11 | 1,00E+00 | 1,00E+00 | Hmgb1l   | 0,97 | No  |
| ENSMUSG00000062478 | 6,19E-02  | 0,547246476  | 6,58E-02  | 7,98E-01 | 9,58E-01 | Ctrc     | 1,04 | No  |
| ENSMUSG00000062480 | -1,34E-01 | 5,237882246  | 3,58E+00  | 5,84E-02 | 2,98E-01 | Acat3    | 0,91 | No  |
| ENSMUSG00000062488 | -3,36E-01 | -0,010971018 | 1,33E+00  | 2,49E-01 | 5,50E-01 | lfit3b   | 0,79 | No  |
| ENSMUSG00000062510 | 2,06E-01  | 3,911656381  | 5,33E+00  | 2,09E-02 | 1,56E-01 | Nsl1     | 1,15 | No  |

|                    |           |              |           |          |          |               |      |     |
|--------------------|-----------|--------------|-----------|----------|----------|---------------|------|-----|
| ENSMUSG00000062515 | -5,71E-02 | 4,285858327  | 4,38E-01  | 5,08E-01 | 7,92E-01 | Fabp4         | 0,96 | No  |
| ENSMUSG00000062518 | -3,56E+00 | -2,600652749 | 5,71E+00  | 1,69E-02 | 1,36E-01 | Zfp534        | 0,08 | No  |
| ENSMUSG00000062519 | -3,16E-02 | 5,277101695  | 2,00E-01  | 6,55E-01 | 8,79E-01 | Zfp398        | 0,98 | No  |
| ENSMUSG00000062526 | 6,99E-02  | 3,896657496  | 5,95E-01  | 4,40E-01 | 7,32E-01 | Mppe1         | 1,05 | No  |
| ENSMUSG00000062542 | 1,25E-01  | 2,826156754  | 1,11E+00  | 2,93E-01 | 5,88E-01 | Syt9          | 1,09 | No  |
| ENSMUSG00000062543 | -2,66E+00 | -3,033639428 | 2,81E+00  | 9,35E-02 | 3,83E-01 | Gsdmcl1       | 0,16 | No  |
| ENSMUSG00000062545 | 2,19E-01  | 2,517420203  | 2,81E+00  | 9,39E-02 | 3,84E-01 | Tlr12         | 1,16 | No  |
| ENSMUSG00000062554 | -5,46E-02 | 4,525394891  | 4,59E-01  | 4,98E-01 | 7,83E-01 | Gm12751       | 0,96 | No  |
| ENSMUSG00000062563 | 9,01E-03  | -3,107646452 | -5,16E-10 | 1,00E+00 | 1,00E+00 | Cys1          | 1,01 | No  |
| ENSMUSG00000062580 | -4,98E-02 | 4,255101401  | 3,47E-01  | 5,56E-01 | 8,21E-01 | Timm17a       | 0,97 | No  |
| ENSMUSG00000062582 | -1,89E-01 | 4,193501788  | 5,04E+00  | 2,48E-02 | 1,74E-01 | Rpl30-ps8     | 0,88 | No  |
| ENSMUSG00000062585 | 3,90E-01  | 5,207352965  | 2,98E+01  | 4,80E-08 | 2,88E-06 | Cnr2          | 1,31 | Yes |
| ENSMUSG00000062588 | 1,64E-01  | 2,867122098  | 1,97E+00  | 1,61E-01 | 5,09E-01 | Gm6104        | 1,12 | No  |
| ENSMUSG00000062590 | 3,67E-01  | 2,918225704  | 9,96E+00  | 1,60E-03 | 2,34E-02 | Armc9         | 1,29 | Yes |
| ENSMUSG00000062591 | -8,93E-02 | 1,030250232  | 1,91E-01  | 6,62E-01 | 8,83E-01 | Tubb4a        | 0,94 | No  |
| ENSMUSG00000062593 | 1,67E-01  | 9,812412257  | 8,80E+00  | 3,01E-03 | 3,84E-02 | Lilrb4a       | 1,12 | Yes |
| ENSMUSG00000062604 | 7,01E-02  | 5,561648611  | 1,04E+00  | 3,07E-01 | 6,05E-01 | Srpk2         | 1,05 | No  |
| ENSMUSG00000062611 | -9,02E-02 | 8,672600892  | 2,48E+00  | 1,15E-01 | 4,20E-01 | Rps3a2        | 0,94 | No  |
| ENSMUSG00000062619 | 1,95E-02  | 2,563572223  | 2,27E-02  | 8,80E-01 | 1,00E+00 | 2310039H08Rik | 1,01 | No  |
| ENSMUSG00000062627 | -2,16E-02 | 5,695382229  | 1,02E-01  | 7,49E-01 | 9,31E-01 | Mysm1         | 0,99 | No  |
| ENSMUSG00000062629 | 3,09E-01  | 0,183735617  | 1,12E+00  | 2,89E-01 | 5,85E-01 | Olfr114       | 1,24 | No  |
| ENSMUSG00000062638 | 2,58E-01  | -0,247177334 | 6,05E-01  | 4,37E-01 | 7,29E-01 | Btnl1         | 1,20 | No  |
| ENSMUSG00000062646 | -8,81E-02 | 4,511498435  | 1,22E+00  | 2,69E-01 | 5,65E-01 | Ganc          | 0,94 | No  |
| ENSMUSG00000062647 | -1,45E-01 | 5,146564354  | 4,05E+00  | 4,42E-02 | 2,50E-01 | Rpl7a         | 0,90 | No  |
| ENSMUSG00000062651 | -1,94E+00 | -3,107619243 | 1,50E+00  | 2,21E-01 | 5,50E-01 | H2al2a        | 0,26 | No  |
| ENSMUSG00000062661 | -4,65E-02 | 3,584206554  | 2,26E-01  | 6,34E-01 | 8,66E-01 | Ncs1          | 0,97 | No  |
| ENSMUSG00000062683 | -6,18E-02 | 4,405879197  | 5,79E-01  | 4,47E-01 | 7,37E-01 | Atp5g2        | 0,96 | No  |
| ENSMUSG00000062687 | 6,06E-01  | -2,311154102 | 4,10E-01  | 5,22E-01 | 8,00E-01 | Cks1brt       | 1,52 | No  |
| ENSMUSG00000062691 | -1,04E-01 | 2,716141061  | 7,20E-01  | 3,96E-01 | 6,96E-01 | Cebpzos       | 0,93 | No  |
| ENSMUSG00000062694 | -8,45E-01 | -2,963241229 | 3,92E-01  | 5,31E-01 | 8,05E-01 | Cav3          | 0,56 | No  |
| ENSMUSG00000062704 | 3,35E-01  | -1,929267087 | 2,06E-01  | 6,50E-01 | 8,76E-01 | 9430002A10Rik | 1,26 | No  |
| ENSMUSG00000062727 | -3,37E-01 | -0,112305393 | 1,28E+00  | 2,57E-01 | 5,50E-01 | Hist1h2bk     | 0,79 | No  |



|                    |           |              |          |          |          |               |      |     |
|--------------------|-----------|--------------|----------|----------|----------|---------------|------|-----|
| ENSMUSG00000062729 | 6,83E-02  | 5,131796565  | 8,98E-01 | 3,43E-01 | 6,44E-01 | Ppox          | 1,05 | No  |
| ENSMUSG00000062732 | -1,89E+00 | -3,1076441   | 1,42E+00 | 2,33E-01 | 5,50E-01 | Lypd4         | 0,27 | No  |
| ENSMUSG00000062742 | -1,35E+00 | -2,548168267 | 1,14E+00 | 2,86E-01 | 5,82E-01 | Gm5239        | 0,39 | No  |
| ENSMUSG00000062743 | -1,11E-01 | 2,789210109  | 8,83E-01 | 3,47E-01 | 6,48E-01 | Zfp677        | 0,93 | No  |
| ENSMUSG00000062753 | 4,27E-02  | 4,881091742  | 3,21E-01 | 5,71E-01 | 8,31E-01 | AI413582      | 1,03 | No  |
| ENSMUSG00000062758 | -1,88E-01 | 5,682284826  | 7,71E+00 | 5,48E-03 | 5,98E-02 | Gm16477       | 0,88 | No  |
| ENSMUSG00000062760 | -1,73E+00 | -2,770551333 | 2,08E+00 | 1,49E-01 | 4,90E-01 | 1810041L15Rik | 0,30 | No  |
| ENSMUSG00000062761 | 1,79E-01  | 4,468330773  | 4,94E+00 | 2,63E-02 | 1,81E-01 | Zfp512        | 1,13 | No  |
| ENSMUSG00000062762 | 1,50E-03  | 6,319982     | 5,54E-04 | 9,81E-01 | 1,00E+00 | Ei24          | 1,00 | No  |
| ENSMUSG00000062773 | 4,69E-01  | -2,448675959 | 2,98E-01 | 5,85E-01 | 8,39E-01 | Tex101        | 1,38 | No  |
| ENSMUSG00000062778 | 1,87E+00  | -3,107639691 | 1,38E+00 | 2,40E-01 | 5,50E-01 | Chia1         | 3,67 | No  |
| ENSMUSG00000062785 | 1,10E-01  | 3,284169022  | 1,14E+00 | 2,87E-01 | 5,83E-01 | Kcnc3         | 1,08 | No  |
| ENSMUSG00000062794 | -8,76E-02 | 1,015005515  | 1,78E-01 | 6,73E-01 | 8,90E-01 | Zfp599        | 0,94 | No  |
| ENSMUSG00000062797 | 1,74E-02  | 3,929930597  | 3,74E-02 | 8,47E-01 | 9,87E-01 | Hikeshi       | 1,01 | No  |
| ENSMUSG00000062822 | -1,04E-01 | 5,606624893  | 2,37E+00 | 1,24E-01 | 4,40E-01 | 4833420G17Rik | 0,93 | No  |
| ENSMUSG00000062825 | -7,58E-02 | 11,03281471  | 1,84E+00 | 1,75E-01 | 5,33E-01 | Actg1         | 0,95 | No  |
| ENSMUSG00000062826 | -8,16E-01 | -2,770547056 | 3,67E-01 | 5,45E-01 | 8,13E-01 | Ces2f         | 0,57 | No  |
| ENSMUSG00000062846 | -9,14E-02 | 5,997258373  | 1,94E+00 | 1,63E-01 | 5,14E-01 | Gm14176       | 0,94 | No  |
| ENSMUSG00000062859 | 2,79E-02  | -1,289431983 | 2,82E-03 | 9,58E-01 | 1,00E+00 | Tcp11         | 1,02 | No  |
| ENSMUSG00000062861 | 1,00E-01  | 3,603608549  | 1,07E+00 | 3,00E-01 | 5,97E-01 | Zfp28         | 1,07 | No  |
| ENSMUSG00000062866 | -1,33E-02 | 5,953905687  | 4,12E-02 | 8,39E-01 | 9,83E-01 | Phactr2       | 0,99 | No  |
| ENSMUSG00000062867 | 3,15E-02  | 3,541387045  | 1,03E-01 | 7,48E-01 | 9,30E-01 | Impdh2        | 1,02 | No  |
| ENSMUSG00000062874 | -8,25E-01 | -2,655061026 | 3,75E-01 | 5,40E-01 | 8,10E-01 | Gm4978        | 0,56 | No  |
| ENSMUSG00000062896 | -5,18E-01 | 4,267744894  | 3,78E+01 | 7,92E-10 | 6,61E-08 | Rpl31-ps11    | 0,70 | Yes |
| ENSMUSG00000062901 | 1,57E-02  | 5,695535764  | 5,48E-02 | 8,15E-01 | 9,69E-01 | Klhl24        | 1,01 | No  |
| ENSMUSG00000062905 | 8,34E-01  | -2,600739033 | 6,05E-01 | 4,37E-01 | 7,30E-01 | Vmn1r32       | 1,78 | No  |
| ENSMUSG00000062906 | 5,65E-02  | 2,530241868  | 1,95E-01 | 6,59E-01 | 8,81E-01 | Hdac10        | 1,04 | No  |
| ENSMUSG00000062908 | 4,60E-02  | 5,427007462  | 4,37E-01 | 5,09E-01 | 7,92E-01 | Acadm         | 1,03 | No  |
| ENSMUSG00000062929 | -8,13E-02 | 4,33624382   | 9,66E-01 | 3,26E-01 | 6,26E-01 | Cfl2          | 0,95 | No  |
| ENSMUSG00000062931 | 1,61E-01  | 1,911257896  | 1,11E+00 | 2,92E-01 | 5,87E-01 | Zfp938        | 1,12 | No  |
| ENSMUSG00000062933 | -7,14E-02 | 9,682455771  | 1,60E+00 | 2,06E-01 | 5,50E-01 | Gm10123       | 0,95 | No  |
| ENSMUSG00000062937 | 2,81E-01  | 4,610439132  | 1,25E+01 | 4,09E-04 | 7,76E-03 | Mtap          | 1,21 | Yes |

|                    |           |              |          |          |          |               |      |     |
|--------------------|-----------|--------------|----------|----------|----------|---------------|------|-----|
| ENSMUSG00000062939 | -9,29E-01 | 4,196718584  | 1,23E+02 | 1,41E-28 | 7,05E-26 | Stat4         | 0,53 | Yes |
| ENSMUSG00000062944 | 1,64E-01  | 2,763169398  | 1,86E+00 | 1,73E-01 | 5,29E-01 | 9130023H24Rik | 1,12 | No  |
| ENSMUSG00000062960 | 3,19E-01  | 4,91735644   | 1,71E+01 | 3,51E-05 | 1,01E-03 | Kdr           | 1,25 | Yes |
| ENSMUSG00000062961 | -2,66E+00 | -3,033639428 | 2,81E+00 | 9,35E-02 | 3,83E-01 | Ccdc177       | 0,16 | No  |
| ENSMUSG00000062962 | -8,61E-01 | -2,89612532  | 4,07E-01 | 5,24E-01 | 8,01E-01 | Gm6378        | 0,55 | No  |
| ENSMUSG00000062963 | -5,34E-03 | 5,510400445  | 5,96E-03 | 9,38E-01 | 1,00E+00 | Ufc1          | 1,00 | No  |
| ENSMUSG00000062980 | -3,05E-01 | 1,060387834  | 2,21E+00 | 1,37E-01 | 4,68E-01 | Cped1         | 0,81 | No  |
| ENSMUSG00000062981 | -4,57E-02 | 4,179288795  | 2,87E-01 | 5,92E-01 | 8,42E-01 | Mrpl42        | 0,97 | No  |
| ENSMUSG00000062991 | -7,29E-01 | 5,103006     | 9,97E+01 | 1,76E-23 | 5,61E-21 | Nrg1          | 0,60 | Yes |
| ENSMUSG00000062995 | 2,40E-01  | 3,832754287  | 6,70E+00 | 9,62E-03 | 9,06E-02 | Ica1          | 1,18 | No  |
| ENSMUSG00000062997 | -1,26E-01 | 4,345129637  | 2,31E+00 | 1,29E-01 | 4,50E-01 | Rpl35         | 0,92 | No  |
| ENSMUSG00000063001 | -1,69E+00 | -2,107431223 | 4,34E+00 | 3,71E-02 | 2,29E-01 | Gm9701        | 0,31 | No  |
| ENSMUSG00000063011 | 1,85E+00  | -3,107657832 | 1,35E+00 | 2,46E-01 | 5,50E-01 | Msln          | 3,61 | No  |
| ENSMUSG00000063015 | -1,32E-01 | 7,895144358  | 5,15E+00 | 2,33E-02 | 1,67E-01 | Ccni          | 0,91 | No  |
| ENSMUSG00000063019 | -1,31E-01 | 5,141662818  | 3,26E+00 | 7,09E-02 | 3,37E-01 | Manbal        | 0,91 | No  |
| ENSMUSG00000063021 | -3,11E-01 | -2,750914122 | 7,09E-02 | 7,90E-01 | 9,54E-01 | Hist1h2ak     | 0,81 | No  |
| ENSMUSG00000063047 | 2,68E-02  | 2,740108358  | 5,19E-02 | 8,20E-01 | 9,71E-01 | Zfp780b       | 1,02 | No  |
| ENSMUSG00000063049 | -3,02E-02 | 3,611648165  | 9,99E-02 | 7,52E-01 | 9,32E-01 | Ing2          | 0,98 | No  |
| ENSMUSG00000063052 | 1,49E-01  | 4,343080229  | 3,22E+00 | 7,26E-02 | 3,42E-01 | Lrrc40        | 1,11 | No  |
| ENSMUSG00000063060 | -2,57E-01 | -0,033675665 | 7,92E-01 | 3,73E-01 | 6,74E-01 | Sox7          | 0,84 | No  |
| ENSMUSG00000063065 | -4,59E-02 | 7,986176431  | 6,22E-01 | 4,30E-01 | 7,24E-01 | Mapk3         | 0,97 | No  |
| ENSMUSG00000063077 | -8,46E-02 | 7,135259427  | 1,98E+00 | 1,59E-01 | 5,07E-01 | Kif1b         | 0,94 | No  |
| ENSMUSG00000063087 | -2,99E-01 | -0,59400296  | 7,61E-01 | 3,83E-01 | 6,85E-01 | Gm10125       | 0,81 | No  |
| ENSMUSG00000063089 | 1,85E-01  | 0,799141524  | 6,50E-01 | 4,20E-01 | 7,15E-01 | Klk1b8        | 1,14 | No  |
| ENSMUSG00000063106 | 1,87E+00  | -3,107639691 | 1,38E+00 | 2,40E-01 | 5,50E-01 | Olfr1510      | 3,67 | No  |
| ENSMUSG00000063108 | -1,30E-01 | 5,023359063  | 3,14E+00 | 7,63E-02 | 3,52E-01 | Zfp26         | 0,91 | No  |
| ENSMUSG00000063109 | -2,66E+00 | -2,96323193  | 2,82E+00 | 9,29E-02 | 3,83E-01 | Dgkeos        | 0,16 | No  |
| ENSMUSG00000063129 | 6,95E-02  | 6,140045885  | 1,16E+00 | 2,82E-01 | 5,79E-01 | Aldoart2      | 1,05 | No  |
| ENSMUSG00000063130 | -1,92E+00 | -3,0336536   | 1,46E+00 | 2,27E-01 | 5,50E-01 | Calml3        | 0,26 | No  |
| ENSMUSG00000063133 | 6,54E-01  | 5,739269698  | 8,92E+01 | 3,63E-21 | 9,13E-19 | Klk1b1        | 1,57 | Yes |
| ENSMUSG00000063137 | 1,83E+00  | -2,963282593 | 1,33E+00 | 2,50E-01 | 5,50E-01 | Olfr177       | 3,56 | No  |
| ENSMUSG00000063142 | 1,83E+00  | -2,89616034  | 1,32E+00 | 2,50E-01 | 5,50E-01 | Kcnma1        | 3,56 | No  |

|                    |           |              |          |          |          |               |      |     |
|--------------------|-----------|--------------|----------|----------|----------|---------------|------|-----|
| ENSMUSG00000063145 | 4,11E-03  | 1,066361004  | 4,11E-04 | 9,84E-01 | 1,00E+00 | Bbs5          | 1,00 | No  |
| ENSMUSG00000063146 | -2,04E-01 | 5,913045276  | 9,62E+00 | 1,92E-03 | 2,72E-02 | Clip2         | 0,87 | Yes |
| ENSMUSG00000063157 | 1,74E+00  | -2,226340772 | 3,47E+00 | 6,24E-02 | 3,11E-01 | Csn2          | 3,33 | No  |
| ENSMUSG00000063160 | 2,16E-01  | 3,073163961  | 3,73E+00 | 5,35E-02 | 2,82E-01 | Numbl         | 1,16 | No  |
| ENSMUSG00000063166 | -7,02E-01 | -0,165594607 | 4,97E+00 | 2,58E-02 | 1,79E-01 | Gm5449        | 0,61 | No  |
| ENSMUSG00000063171 | -1,33E-01 | 2,268534045  | 9,13E-01 | 3,39E-01 | 6,40E-01 | Rps4l         | 0,91 | No  |
| ENSMUSG00000063172 | -3,26E-01 | 1,442075986  | 3,42E+00 | 6,43E-02 | 3,18E-01 | Hspb11        | 0,80 | No  |
| ENSMUSG00000063177 | 1,30E-01  | 2,638646294  | 1,03E+00 | 3,10E-01 | 6,09E-01 | Klk1b27       | 1,09 | No  |
| ENSMUSG00000063179 | 3,85E-02  | 3,997167785  | 1,89E-01 | 6,64E-01 | 8,84E-01 | Pstk          | 1,03 | No  |
| ENSMUSG00000063188 | 1,36E-01  | -1,726265586 | 5,56E-02 | 8,14E-01 | 9,68E-01 | Olf107        | 1,10 | No  |
| ENSMUSG00000063193 | 9,85E-02  | 5,598653469  | 2,07E+00 | 1,50E-01 | 4,91E-01 | Cd300lb       | 1,07 | No  |
| ENSMUSG00000063200 | -2,26E-02 | 4,810273475  | 8,70E-02 | 7,68E-01 | 9,41E-01 | Nol7          | 0,98 | No  |
| ENSMUSG00000063229 | 1,81E-01  | 8,970619211  | 1,01E+01 | 1,50E-03 | 2,23E-02 | Ldha          | 1,13 | Yes |
| ENSMUSG00000063232 | -6,79E-02 | -2,548241956 | 4,75E-03 | 9,45E-01 | 1,00E+00 | Serpina11     | 0,95 | No  |
| ENSMUSG00000063234 | 2,70E-01  | 2,848305234  | 5,46E+00 | 1,95E-02 | 1,49E-01 | Gpr84         | 1,21 | No  |
| ENSMUSG00000063235 | 5,54E-03  | 5,170065296  | 5,89E-03 | 9,39E-01 | 1,00E+00 | Ptpmt1        | 1,00 | No  |
| ENSMUSG00000063236 | -1,81E-02 | 4,107429693  | 4,34E-02 | 8,35E-01 | 9,80E-01 | 1110038F14Rik | 0,99 | No  |
| ENSMUSG00000063239 | 2,64E+00  | -2,655094739 | 2,70E+00 | 1,01E-01 | 3,92E-01 | Grm4          | 6,25 | No  |
| ENSMUSG00000063245 | 1,11E-01  | 4,188112942  | 1,69E+00 | 1,94E-01 | 5,50E-01 | Zfp993        | 1,08 | No  |
| ENSMUSG00000063253 | 1,47E-01  | 3,604125825  | 2,25E+00 | 1,33E-01 | 4,60E-01 | Scoc          | 1,11 | No  |
| ENSMUSG00000063268 | 6,41E-03  | 5,184002077  | 7,98E-03 | 9,29E-01 | 1,00E+00 | Parp10        | 1,00 | No  |
| ENSMUSG00000063273 | 1,62E-01  | 6,256027152  | 6,41E+00 | 1,13E-02 | 1,02E-01 | Naa15         | 1,12 | No  |
| ENSMUSG00000063275 | -4,50E-02 | 0,21828354   | 2,49E-02 | 8,75E-01 | 1,00E+00 | Hacd1         | 0,97 | No  |
| ENSMUSG00000063281 | 1,03E-01  | 4,102419243  | 1,41E+00 | 2,35E-01 | 5,50E-01 | Zfp35         | 1,07 | No  |
| ENSMUSG00000063286 | 1,57E-01  | 8,206700845  | 7,33E+00 | 6,79E-03 | 7,03E-02 | Gm8995        | 1,11 | No  |
| ENSMUSG00000063314 | -8,75E-02 | 5,568952992  | 1,62E+00 | 2,03E-01 | 5,50E-01 | Gm12657       | 0,94 | No  |
| ENSMUSG00000063316 | -1,54E-01 | 4,34332873   | 3,49E+00 | 6,18E-02 | 3,09E-01 | Rpl27         | 0,90 | No  |
| ENSMUSG00000063317 | 1,04E-01  | 5,226970654  | 2,14E+00 | 1,43E-01 | 4,79E-01 | Usp31         | 1,08 | No  |
| ENSMUSG00000063320 | 1,47E-03  | 1,187490473  | 5,54E-05 | 9,94E-01 | 1,00E+00 | 1190007I07Rik | 1,00 | No  |
| ENSMUSG00000063328 | -2,26E-01 | 6,123801231  | 1,22E+01 | 4,80E-04 | 8,89E-03 | Gm9396        | 0,86 | Yes |
| ENSMUSG00000063334 | -1,87E-02 | 5,991006718  | 8,12E-02 | 7,76E-01 | 9,45E-01 | Krr1          | 0,99 | No  |
| ENSMUSG00000063354 | -2,25E-01 | 3,289341335  | 4,70E+00 | 3,02E-02 | 2,00E-01 | Slc39a4       | 0,86 | No  |

|                    |           |              |          |          |          |               |      |     |
|--------------------|-----------|--------------|----------|----------|----------|---------------|------|-----|
| ENSMUSG00000063358 | -1,51E-02 | 7,525861229  | 6,52E-02 | 7,98E-01 | 9,59E-01 | Mapk1         | 0,99 | No  |
| ENSMUSG00000063362 | 1,94E-01  | 4,069403593  | 4,91E+00 | 2,67E-02 | 1,83E-01 | Alg11         | 1,14 | No  |
| ENSMUSG00000063364 | 9,81E-02  | 0,351655459  | 1,60E-01 | 6,89E-01 | 8,99E-01 | 3300002I08Rik | 1,07 | No  |
| ENSMUSG00000063376 | -1,87E+00 | -3,107637761 | 1,39E+00 | 2,38E-01 | 5,50E-01 | Ifna13        | 0,27 | No  |
| ENSMUSG00000063382 | -3,12E-01 | 5,890660822  | 2,22E+01 | 2,46E-06 | 9,73E-05 | Bcl9l         | 0,81 | Yes |
| ENSMUSG00000063383 | 3,12E-01  | 0,950279125  | 2,17E+00 | 1,41E-01 | 4,74E-01 | Zfp947        | 1,24 | No  |
| ENSMUSG00000063388 | -1,94E+00 | -3,107619243 | 1,50E+00 | 2,21E-01 | 5,50E-01 | BC023105      | 0,26 | No  |
| ENSMUSG00000063406 | 1,22E-01  | 7,09470547   | 4,06E+00 | 4,40E-02 | 2,50E-01 | Tmed5         | 1,09 | No  |
| ENSMUSG00000063410 | -8,85E-02 | 7,645551718  | 2,26E+00 | 1,33E-01 | 4,58E-01 | Stk24         | 0,94 | No  |
| ENSMUSG00000063412 | -4,42E-02 | 5,569683584  | 4,15E-01 | 5,19E-01 | 7,98E-01 | Gm10131       | 0,97 | No  |
| ENSMUSG00000063415 | -5,85E-01 | 1,484348853  | 9,91E+00 | 1,64E-03 | 2,39E-02 | Cyp26b1       | 0,67 | Yes |
| ENSMUSG00000063430 | 9,34E-02  | -0,413070997 | 5,39E-02 | 8,16E-01 | 9,69E-01 | Wscd2         | 1,07 | No  |
| ENSMUSG00000063439 | 6,90E-03  | 4,491636513  | 7,23E-03 | 9,32E-01 | 1,00E+00 | B9d2          | 1,00 | No  |
| ENSMUSG00000063445 | 1,78E-01  | 3,488949578  | 3,21E+00 | 7,33E-02 | 3,44E-01 | Nmral1        | 1,13 | No  |
| ENSMUSG00000063447 | 1,22E+00  | -2,770593231 | 9,26E-01 | 3,36E-01 | 6,37E-01 | Ube2d2b       | 2,33 | No  |
| ENSMUSG00000063450 | 6,57E-02  | 5,448559503  | 9,02E-01 | 3,42E-01 | 6,43E-01 | Syne2         | 1,05 | No  |
| ENSMUSG00000063455 | -5,61E-01 | 0,480918798  | 5,34E+00 | 2,09E-02 | 1,56E-01 | D630045J12Rik | 0,68 | No  |
| ENSMUSG00000063457 | -7,43E-02 | 7,103378404  | 1,51E+00 | 2,19E-01 | 5,50E-01 | Rps15         | 0,95 | No  |
| ENSMUSG00000063458 | -1,28E-01 | 2,384085125  | 9,28E-01 | 3,35E-01 | 6,36E-01 | Lrmda         | 0,91 | No  |
| ENSMUSG00000063480 | -1,37E-02 | 5,316868357  | 3,76E-02 | 8,46E-01 | 9,87E-01 | Snu13         | 0,99 | No  |
| ENSMUSG00000063488 | -1,92E-02 | 1,776265297  | 1,53E-02 | 9,01E-01 | 1,00E+00 | Zkscan7       | 0,99 | No  |
| ENSMUSG00000063506 | -4,17E-01 | 3,178927901  | 1,55E+01 | 8,12E-05 | 2,04E-03 | Arhgap22      | 0,75 | Yes |
| ENSMUSG00000063511 | -1,71E-01 | 7,78177452   | 8,54E+00 | 3,47E-03 | 4,27E-02 | Snrnp70       | 0,89 | Yes |
| ENSMUSG00000063522 | 6,33E-01  | -1,448698195 | 1,18E+00 | 2,78E-01 | 5,74E-01 | 2010109I03Rik | 1,55 | No  |
| ENSMUSG00000063524 | 1,81E-01  | 8,065440053  | 9,68E+00 | 1,86E-03 | 2,64E-02 | Eno1          | 1,13 | Yes |
| ENSMUSG00000063531 | -3,59E+00 | -2,770568198 | 5,79E+00 | 1,61E-02 | 1,32E-01 | Sema3e        | 0,08 | No  |
| ENSMUSG00000063535 | 6,69E-01  | -0,697434256 | 3,08E+00 | 7,95E-02 | 3,61E-01 | Zfp773        | 1,59 | No  |
| ENSMUSG00000063543 | -8,96E-02 | 3,19121848   | 6,94E-01 | 4,05E-01 | 7,02E-01 | Gm5616        | 0,94 | No  |
| ENSMUSG00000063548 | -1,87E+00 | -3,107637761 | 1,39E+00 | 2,38E-01 | 5,50E-01 | Gm4825        | 0,27 | No  |
| ENSMUSG00000063550 | -6,64E-03 | 6,664460035  | 1,15E-02 | 9,15E-01 | 1,00E+00 | Nup98         | 1,00 | No  |
| ENSMUSG00000063556 | -1,61E-01 | 7,106715239  | 7,14E+00 | 7,52E-03 | 7,57E-02 | Gm10132       | 0,89 | No  |
| ENSMUSG00000063558 | -7,00E-01 | -1,929220859 | 1,12E+00 | 2,90E-01 | 5,86E-01 | Aox1          | 0,62 | No  |

|                    |           |              |          |          |          |               |      |     |
|--------------------|-----------|--------------|----------|----------|----------|---------------|------|-----|
| ENSMUSG00000063564 | 3,53E-02  | 1,7788394    | 4,64E-02 | 8,29E-01 | 9,77E-01 | Col23a1       | 1,02 | No  |
| ENSMUSG00000063568 | -1,01E-01 | 3,749986627  | 1,20E+00 | 2,74E-01 | 5,70E-01 | Jazf1         | 0,93 | No  |
| ENSMUSG00000063576 | 4,51E-02  | 5,736489524  | 4,49E-01 | 5,03E-01 | 7,88E-01 | Klhdc3        | 1,03 | No  |
| ENSMUSG00000063583 | -4,74E-02 | -2,832029451 | 1,49E-03 | 9,69E-01 | 1,00E+00 | Olfr1410      | 0,97 | No  |
| ENSMUSG00000063586 | -7,07E-01 | -1,574195491 | 1,72E+00 | 1,90E-01 | 5,50E-01 | Gm5513        | 0,61 | No  |
| ENSMUSG00000063594 | -6,35E-01 | -1,311155457 | 1,49E+00 | 2,23E-01 | 5,50E-01 | Gng8          | 0,64 | No  |
| ENSMUSG00000063600 | 3,24E-01  | -2,497561456 | 1,07E-01 | 7,44E-01 | 9,29E-01 | Egfem1        | 1,25 | No  |
| ENSMUSG00000063605 | -3,40E-02 | 3,735073857  | 1,34E-01 | 7,14E-01 | 9,12E-01 | Ccdc102a      | 0,98 | No  |
| ENSMUSG00000063611 | 4,29E-01  | 2,800464558  | 1,28E+01 | 3,40E-04 | 6,70E-03 | Gm10134       | 1,35 | Yes |
| ENSMUSG00000063623 | 2,84E-01  | 5,160366492  | 1,52E+01 | 9,44E-05 | 2,31E-03 | C230062I16Rik | 1,22 | Yes |
| ENSMUSG00000063626 | 1,82E+00  | -2,963253027 | 1,31E+00 | 2,52E-01 | 5,50E-01 | Unc5d         | 3,53 | No  |
| ENSMUSG00000063628 | -2,29E-01 | 7,564076766  | 1,50E+01 | 1,10E-04 | 2,63E-03 | Gm7665        | 0,85 | Yes |
| ENSMUSG00000063632 | -1,87E+00 | -3,03364178  | 1,41E+00 | 2,36E-01 | 5,50E-01 | Sox11         | 0,27 | No  |
| ENSMUSG00000063646 | -4,78E-02 | -2,655150386 | 2,06E-03 | 9,64E-01 | 1,00E+00 | Jakmip1       | 0,97 | No  |
| ENSMUSG00000063651 | -1,87E+00 | -3,107637761 | 1,39E+00 | 2,38E-01 | 5,50E-01 | Cnfn          | 0,27 | No  |
| ENSMUSG00000063652 | 4,11E-01  | 3,251210624  | 1,43E+01 | 1,52E-04 | 3,44E-03 | Slc22a21      | 1,33 | Yes |
| ENSMUSG00000063656 | -1,23E-01 | 1,961832903  | 6,56E-01 | 4,18E-01 | 7,13E-01 | Gm10135       | 0,92 | No  |
| ENSMUSG00000063659 | -9,51E-02 | 7,319753953  | 2,55E+00 | 1,10E-01 | 4,07E-01 | Zbtb18        | 0,94 | No  |
| ENSMUSG00000063660 | -2,91E-01 | -1,535336054 | 3,10E-01 | 5,78E-01 | 8,35E-01 | Olfr98        | 0,82 | No  |
| ENSMUSG00000063672 | 1,87E+00  | -3,107639691 | 1,38E+00 | 2,40E-01 | 5,50E-01 | Nkx6-3        | 3,67 | No  |
| ENSMUSG00000063681 | 1,87E+00  | -3,03364371  | 1,36E+00 | 2,43E-01 | 5,50E-01 | Crb1          | 3,66 | No  |
| ENSMUSG00000063683 | 1,85E+00  | -3,107657832 | 1,35E+00 | 2,46E-01 | 5,50E-01 | Glyat         | 3,61 | No  |
| ENSMUSG00000063684 | -1,69E-03 | 6,377682381  | 7,10E-04 | 9,79E-01 | 1,00E+00 | Gm13910       | 1,00 | No  |
| ENSMUSG00000063689 | 1,05E+00  | -2,929330032 | 4,72E-01 | 4,92E-01 | 7,78E-01 | Hist2h2ab     | 2,07 | No  |
| ENSMUSG00000063694 | 7,57E-02  | 4,815984791  | 9,77E-01 | 3,23E-01 | 6,23E-01 | Cycs          | 1,05 | No  |
| ENSMUSG00000063696 | -1,47E-01 | 9,468958036  | 6,78E+00 | 9,21E-03 | 8,78E-02 | Gm8730        | 0,90 | No  |
| ENSMUSG00000063698 | -6,12E-01 | -0,831947941 | 2,32E+00 | 1,28E-01 | 4,49E-01 | Sfxn4         | 0,65 | No  |
| ENSMUSG00000063704 | -7,33E-01 | -2,497533592 | 6,03E-01 | 4,38E-01 | 7,30E-01 | Mapk15        | 0,60 | No  |
| ENSMUSG00000063713 | 1,87E+00  | -2,548299451 | 2,62E+00 | 1,06E-01 | 3,98E-01 | Klk1b24       | 3,67 | No  |
| ENSMUSG00000063714 | -1,92E-01 | 1,25902877   | 1,06E+00 | 3,04E-01 | 6,01E-01 | Sp3os         | 0,88 | No  |
| ENSMUSG00000063727 | -6,15E-01 | -0,205662795 | 3,58E+00 | 5,83E-02 | 2,98E-01 | Tnfrsf11b     | 0,65 | No  |
| ENSMUSG00000063739 | -6,08E-02 | 5,303049576  | 7,33E-01 | 3,92E-01 | 6,92E-01 | Gm4963        | 0,96 | No  |

|                    |           |              |          |          |          |          |      |     |
|--------------------|-----------|--------------|----------|----------|----------|----------|------|-----|
| ENSMUSG00000063751 | -3,00E-01 | -2,311127766 | 1,35E-01 | 7,14E-01 | 9,12E-01 | Platr8   | 0,81 | No  |
| ENSMUSG00000063754 | -3,68E-01 | 6,058818072  | 3,20E+01 | 1,55E-08 | 1,03E-06 | Gm10136  | 0,77 | Yes |
| ENSMUSG00000063760 | 7,87E-02  | 5,581445224  | 1,32E+00 | 2,51E-01 | 5,50E-01 | Rnf217   | 1,06 | No  |
| ENSMUSG00000063765 | 1,60E-01  | 1,902607048  | 1,08E+00 | 2,99E-01 | 5,95E-01 | Chadl    | 1,12 | No  |
| ENSMUSG00000063767 | -1,41E+00 | -2,770599592 | 1,25E+00 | 2,64E-01 | 5,59E-01 | S100a7a  | 0,38 | No  |
| ENSMUSG00000063779 | 1,80E-01  | 1,583892011  | 1,03E+00 | 3,10E-01 | 6,09E-01 | Chil4    | 1,13 | No  |
| ENSMUSG00000063787 | -1,68E-01 | 4,493716949  | 4,34E+00 | 3,73E-02 | 2,30E-01 | Chchd1   | 0,89 | No  |
| ENSMUSG00000063796 | -1,14E-02 | -3,033635021 | 1,50E-05 | 9,97E-01 | 1,00E+00 | Slc22a8  | 0,99 | No  |
| ENSMUSG00000063800 | -5,55E-02 | 4,070908454  | 4,00E-01 | 5,27E-01 | 8,04E-01 | Prpf38a  | 0,96 | No  |
| ENSMUSG00000063801 | 3,77E-02  | 5,460798754  | 2,94E-01 | 5,87E-01 | 8,40E-01 | Ap3s2    | 1,03 | No  |
| ENSMUSG00000063802 | -6,87E-02 | 4,912810264  | 8,38E-01 | 3,60E-01 | 6,61E-01 | Hspbp1   | 0,95 | No  |
| ENSMUSG00000063808 | 2,19E-01  | 3,368671448  | 4,61E+00 | 3,18E-02 | 2,07E-01 | Gpatch1  | 1,16 | No  |
| ENSMUSG00000063810 | 3,56E-01  | 4,1818695    | 1,69E+01 | 3,94E-05 | 1,11E-03 | Alms1    | 1,28 | Yes |
| ENSMUSG00000063820 | 3,11E-01  | -1,205992408 | 4,10E-01 | 5,22E-01 | 8,00E-01 | Arl9     | 1,24 | No  |
| ENSMUSG00000063821 | 1,85E+00  | -3,107657832 | 1,35E+00 | 2,46E-01 | 5,50E-01 | Dupd1    | 3,61 | No  |
| ENSMUSG00000063830 | -1,40E+00 | -2,896110316 | 1,23E+00 | 2,67E-01 | 5,63E-01 | Gm6065   | 0,38 | No  |
| ENSMUSG00000063838 | 1,84E+00  | -3,033632273 | 1,33E+00 | 2,49E-01 | 5,50E-01 | Cdc42ep5 | 3,58 | No  |
| ENSMUSG00000063849 | 8,71E-02  | 4,26829724   | 1,07E+00 | 3,01E-01 | 5,97E-01 | Ppcdc    | 1,06 | No  |
| ENSMUSG00000063851 | 1,60E+00  | -2,65522043  | 1,76E+00 | 1,85E-01 | 5,49E-01 | Rnf183   | 3,04 | No  |
| ENSMUSG00000063856 | -3,66E-02 | 9,985712774  | 4,23E-01 | 5,15E-01 | 7,97E-01 | Gpx1     | 0,97 | No  |
| ENSMUSG00000063870 | 1,01E-01  | 8,592764922  | 3,11E+00 | 7,78E-02 | 3,56E-01 | Chd4     | 1,07 | No  |
| ENSMUSG00000063873 | -7,45E-01 | -0,268101299 | 4,22E+00 | 3,99E-02 | 2,37E-01 | Slc24a3  | 0,60 | No  |
| ENSMUSG00000063875 | -3,02E-01 | 3,320686844  | 8,27E+00 | 4,02E-03 | 4,75E-02 | Rps6-ps1 | 0,81 | Yes |
| ENSMUSG00000063882 | -1,98E-01 | 6,257879305  | 9,59E+00 | 1,95E-03 | 2,75E-02 | Uqcrh    | 0,87 | Yes |
| ENSMUSG00000063884 | 3,34E-02  | 4,563827625  | 1,77E-01 | 6,74E-01 | 8,90E-01 | Ptcd3    | 1,02 | No  |
| ENSMUSG00000063885 | 9,20E-02  | -0,847847571 | 5,22E-02 | 8,19E-01 | 9,71E-01 | Gm6498   | 1,07 | No  |
| ENSMUSG00000063887 | 1,60E+00  | -2,832072821 | 1,75E+00 | 1,86E-01 | 5,50E-01 | Nlgn1    | 3,03 | No  |
| ENSMUSG00000063888 | 2,24E-02  | 5,975527425  | 1,17E-01 | 7,32E-01 | 9,22E-01 | Rpl7l1   | 1,02 | No  |
| ENSMUSG00000063889 | -2,99E-01 | 4,557180346  | 1,44E+01 | 1,47E-04 | 3,32E-03 | Crem     | 0,81 | Yes |
| ENSMUSG00000063894 | 2,45E-01  | 3,804865028  | 7,24E+00 | 7,13E-03 | 7,28E-02 | Zkscan8  | 1,18 | No  |
| ENSMUSG00000063895 | 2,47E-01  | 4,261559427  | 8,57E+00 | 3,42E-03 | 4,23E-02 | Nupl1    | 1,19 | Yes |
| ENSMUSG00000063900 | -2,70E+00 | -3,033614577 | 2,89E+00 | 8,93E-02 | 3,79E-01 | Adam26b  | 0,15 | No  |

|                    |           |              |          |          |          |               |      |     |
|--------------------|-----------|--------------|----------|----------|----------|---------------|------|-----|
| ENSMUSG00000063902 | 1,71E-02  | 8,288203321  | 8,77E-02 | 7,67E-01 | 9,40E-01 | Gm7964        | 1,01 | No  |
| ENSMUSG00000063903 | 4,12E-02  | -1,448655842 | 5,75E-03 | 9,40E-01 | 1,00E+00 | Klk1          | 1,03 | No  |
| ENSMUSG00000063904 | 6,47E-02  | 6,489335362  | 1,06E+00 | 3,03E-01 | 5,99E-01 | 4930533014Rik | 1,05 | No  |
| ENSMUSG00000063911 | 1,85E+00  | -2,963264462 | 1,34E+00 | 2,48E-01 | 5,50E-01 | Tdgf1-ps2     | 3,59 | No  |
| ENSMUSG00000063931 | 1,44E-01  | 6,126051736  | 4,89E+00 | 2,70E-02 | 1,85E-01 | Pepd          | 1,10 | No  |
| ENSMUSG00000063952 | -1,81E-01 | 5,252095142  | 6,55E+00 | 1,05E-02 | 9,66E-02 | Brpf3         | 0,88 | No  |
| ENSMUSG00000063953 | 9,27E-02  | 4,440110979  | 1,30E+00 | 2,54E-01 | 5,50E-01 | Amd2          | 1,07 | No  |
| ENSMUSG00000063954 | 1,70E-02  | 1,791563993  | 1,12E-02 | 9,16E-01 | 1,00E+00 | Hist2h2aa2    | 1,01 | No  |
| ENSMUSG00000063972 | -4,42E-01 | 2,825741356  | 1,39E+01 | 1,91E-04 | 4,18E-03 | Nr6a1         | 0,74 | Yes |
| ENSMUSG00000063975 | -8,10E-01 | -2,963247942 | 3,56E-01 | 5,51E-01 | 8,17E-01 | Slco1a5       | 0,57 | No  |
| ENSMUSG00000064023 | 3,42E-01  | 0,661334363  | 2,16E+00 | 1,41E-01 | 4,75E-01 | Klk8          | 1,27 | No  |
| ENSMUSG00000064030 | -9,51E-02 | 4,461202806  | 1,38E+00 | 2,41E-01 | 5,50E-01 | Pym1          | 0,94 | No  |
| ENSMUSG00000064032 | 1,78E-01  | 5,475849305  | 6,59E+00 | 1,03E-02 | 9,52E-02 | Gm10143       | 1,13 | No  |
| ENSMUSG00000064037 | 1,47E-02  | 4,219882332  | 3,06E-02 | 8,61E-01 | 9,96E-01 | Gpn1          | 1,01 | No  |
| ENSMUSG00000064039 | 8,32E-01  | -1,107691459 | 3,24E+00 | 7,19E-02 | 3,40E-01 | Ccr11         | 1,78 | No  |
| ENSMUSG00000064043 | 2,05E-01  | 7,390110613  | 1,18E+01 | 6,03E-04 | 1,07E-02 | Trerf1        | 1,15 | Yes |
| ENSMUSG00000064057 | 7,46E-01  | -2,832025862 | 3,03E-01 | 5,82E-01 | 8,38E-01 | Scgb3a1       | 1,68 | No  |
| ENSMUSG00000064061 | 5,22E-03  | 3,402042934  | 2,68E-03 | 9,59E-01 | 1,00E+00 | Dzip3         | 1,00 | No  |
| ENSMUSG00000064063 | -2,17E-01 | -1,246884461 | 2,20E-01 | 6,39E-01 | 8,69E-01 | BC048507      | 0,86 | No  |
| ENSMUSG00000064065 | 2,17E-01  | 3,740849488  | 5,27E+00 | 2,16E-02 | 1,58E-01 | Ipcef1        | 1,16 | No  |
| ENSMUSG00000064068 | 1,63E-02  | 4,711565387  | 4,37E-02 | 8,34E-01 | 9,79E-01 | Mtx1          | 1,01 | No  |
| ENSMUSG00000064080 | -1,13E+00 | -1,963104737 | 2,50E+00 | 1,14E-01 | 4,17E-01 | Fbln2         | 0,46 | No  |
| ENSMUSG00000064081 | -1,71E+00 | -2,8320129   | 2,02E+00 | 1,55E-01 | 4,99E-01 | Gm8973        | 0,31 | No  |
| ENSMUSG00000064090 | -6,96E-02 | 4,139506915  | 6,69E-01 | 4,13E-01 | 7,09E-01 | Vrk2          | 0,95 | No  |
| ENSMUSG00000064105 | 2,22E-01  | 3,754796075  | 5,43E+00 | 1,98E-02 | 1,50E-01 | Cnm2          | 1,17 | No  |
| ENSMUSG00000064109 | -1,01E-01 | 1,880569261  | 4,25E-01 | 5,14E-01 | 7,96E-01 | Hcst          | 0,93 | No  |
| ENSMUSG00000064115 | 1,81E+00  | -3,10765737  | 1,28E+00 | 2,58E-01 | 5,50E-01 | Cadm2         | 3,49 | No  |
| ENSMUSG00000064120 | -2,76E-02 | 5,177923782  | 1,47E-01 | 7,01E-01 | 9,05E-01 | Mocs1         | 0,98 | No  |
| ENSMUSG00000064125 | -6,79E-02 | -0,879752458 | 2,80E-02 | 8,67E-01 | 9,99E-01 | Prr36         | 0,95 | No  |
| ENSMUSG00000064128 | 9,97E-02  | 3,785535264  | 1,15E+00 | 2,83E-01 | 5,79E-01 | Cenpj         | 1,07 | No  |
| ENSMUSG00000064138 | 5,23E-02  | 5,307892512  | 5,42E-01 | 4,62E-01 | 7,50E-01 | Fam172a       | 1,04 | No  |
| ENSMUSG00000064140 | -1,50E+00 | -2,355621574 | 2,31E+00 | 1,29E-01 | 4,50E-01 | Trim38        | 0,35 | No  |

|                    |           |              |          |          |          |               |      |     |
|--------------------|-----------|--------------|----------|----------|----------|---------------|------|-----|
| ENSMUSG00000064141 | -5,80E-01 | 1,527603006  | 1,06E+01 | 1,14E-03 | 1,79E-02 | Zfp69         | 0,67 | Yes |
| ENSMUSG00000064145 | -2,18E-01 | 5,932624444  | 1,08E+01 | 1,04E-03 | 1,67E-02 | Arih2         | 0,86 | Yes |
| ENSMUSG00000064147 | -3,13E-01 | 5,146680073  | 1,89E+01 | 1,41E-05 | 4,53E-04 | Rab44         | 0,80 | Yes |
| ENSMUSG00000064158 | -3,91E-01 | -2,863714745 | 9,44E-02 | 7,59E-01 | 9,36E-01 | Izumo1        | 0,76 | No  |
| ENSMUSG00000064177 | 9,39E-02  | 1,592394795  | 2,94E-01 | 5,88E-01 | 8,40E-01 | Ghrl          | 1,07 | No  |
| ENSMUSG00000064179 | 3,04E-01  | -0,510154818 | 6,81E-01 | 4,09E-01 | 7,06E-01 | Tnnt1         | 1,23 | No  |
| ENSMUSG00000064181 | 2,09E-01  | 2,807092266  | 3,12E+00 | 7,72E-02 | 3,54E-01 | Rab3ip        | 1,16 | No  |
| ENSMUSG00000064193 | 1,70E-01  | 9,486413771  | 9,06E+00 | 2,61E-03 | 3,45E-02 | Gm4735        | 1,13 | Yes |
| ENSMUSG00000064194 | 2,65E+00  | -2,831982301 | 2,71E+00 | 9,98E-02 | 3,92E-01 | Zfp936        | 6,28 | No  |
| ENSMUSG00000064202 | -3,35E-02 | -0,252266777 | 1,16E-02 | 9,14E-01 | 1,00E+00 | 4430402I18Rik | 0,98 | No  |
| ENSMUSG00000064208 | -9,76E-02 | 5,089351023  | 1,78E+00 | 1,82E-01 | 5,44E-01 | Gm10145       | 0,93 | No  |
| ENSMUSG00000064210 | 8,56E-02  | 6,502545792  | 1,85E+00 | 1,73E-01 | 5,31E-01 | Ano6          | 1,06 | No  |
| ENSMUSG00000064215 | -2,55E-01 | 4,400677247  | 9,68E+00 | 1,86E-03 | 2,64E-02 | lfi27         | 0,84 | Yes |
| ENSMUSG00000064220 | 1,14E-01  | 1,161882363  | 3,27E-01 | 5,68E-01 | 8,29E-01 | Hist2h2aa1    | 1,08 | No  |
| ENSMUSG00000064225 | -1,31E+00 | -2,070107598 | 2,94E+00 | 8,63E-02 | 3,78E-01 | Paqr9         | 0,40 | No  |
| ENSMUSG00000064231 | -3,20E-01 | -2,146063398 | 1,54E-01 | 6,95E-01 | 9,02E-01 | Gm5321        | 0,80 | No  |
| ENSMUSG00000064246 | -1,66E+00 | -1,831927078 | 5,30E+00 | 2,13E-02 | 1,57E-01 | Chil1         | 0,32 | No  |
| ENSMUSG00000064247 | -6,82E-02 | 2,681983301  | 3,10E-01 | 5,78E-01 | 8,35E-01 | Plcx1         | 0,95 | No  |
| ENSMUSG00000064254 | 2,77E-02  | 3,556281623  | 7,74E-02 | 7,81E-01 | 9,49E-01 | Ethe1         | 1,02 | No  |
| ENSMUSG00000064262 | -1,38E+00 | -1,831985887 | 5,51E+00 | 1,89E-02 | 1,46E-01 | Gimap8        | 0,38 | No  |
| ENSMUSG00000064264 | 3,93E-01  | 0,539386134  | 2,62E+00 | 1,05E-01 | 3,97E-01 | Zfp428        | 1,31 | No  |
| ENSMUSG00000064267 | 1,63E-02  | 8,071740511  | 7,92E-02 | 7,78E-01 | 9,47E-01 | Hvcn1         | 1,01 | No  |
| ENSMUSG00000064272 | 9,88E-01  | -0,801093822 | 5,53E+00 | 1,87E-02 | 1,45E-01 | Gpbar1        | 1,98 | No  |
| ENSMUSG00000064280 | -7,93E-02 | 2,668124815  | 3,79E-01 | 5,38E-01 | 8,09E-01 | Ccdc146       | 0,95 | No  |
| ENSMUSG00000064281 | -1,35E-01 | 6,217193753  | 4,42E+00 | 3,55E-02 | 2,23E-01 | Rpl19-ps1     | 0,91 | No  |
| ENSMUSG00000064284 | 6,87E-02  | 3,072207333  | 3,90E-01 | 5,32E-01 | 8,06E-01 | Cdpf1         | 1,05 | No  |
| ENSMUSG00000064288 | -1,92E-01 | -0,556860474 | 2,80E-01 | 5,97E-01 | 8,45E-01 | Hist1h4k      | 0,88 | No  |
| ENSMUSG00000064289 | -3,59E-02 | 6,555077951  | 3,30E-01 | 5,66E-01 | 8,28E-01 | Tank          | 0,98 | No  |
| ENSMUSG00000064294 | -2,03E+00 | -2,401390559 | 5,09E+00 | 2,41E-02 | 1,70E-01 | Aox3          | 0,24 | No  |
| ENSMUSG00000064299 | -5,30E-01 | 1,813675228  | 1,20E+01 | 5,23E-04 | 9,52E-03 | 4921528I07Rik | 0,69 | Yes |
| ENSMUSG00000064302 | 9,93E-03  | 5,675222549  | 2,15E-02 | 8,83E-01 | 1,00E+00 | Clasp1        | 1,01 | No  |
| ENSMUSG00000064307 | -1,54E-01 | 1,091567781  | 5,89E-01 | 4,43E-01 | 7,34E-01 | Lrrc51        | 0,90 | No  |



|                    |           |              |          |          |          |               |      |     |
|--------------------|-----------|--------------|----------|----------|----------|---------------|------|-----|
| ENSMUSG00000064308 | 1,87E+00  | -3,107639691 | 1,38E+00 | 2,40E-01 | 5,50E-01 | 2410137M14Rik | 3,67 | No  |
| ENSMUSG00000064317 | 1,58E-02  | 3,712780275  | 2,76E-02 | 8,68E-01 | 1,00E+00 | Gm10146       | 1,01 | No  |
| ENSMUSG00000064325 | -9,13E-01 | 0,909222229  | 2,02E+01 | 6,83E-06 | 2,38E-04 | Hhip          | 0,53 | Yes |
| ENSMUSG00000064326 | 3,66E-02  | 3,63465713   | 1,45E-01 | 7,03E-01 | 9,06E-01 | Siva1         | 1,03 | No  |
| ENSMUSG00000064329 | -1,23E+00 | -2,448652601 | 1,44E+00 | 2,30E-01 | 5,50E-01 | Scn1a         | 0,43 | No  |
| ENSMUSG00000064330 | 3,02E-02  | 6,539928982  | 2,33E-01 | 6,30E-01 | 8,62E-01 | Pde6h         | 1,02 | No  |
| ENSMUSG00000064373 | 9,76E-02  | 6,572234453  | 2,44E+00 | 1,19E-01 | 4,28E-01 | Selenop       | 1,07 | No  |
| ENSMUSG00000064380 | 4,69E-01  | -0,430747686 | 2,01E+00 | 1,56E-01 | 5,01E-01 | Gm26448       | 1,38 | No  |
| ENSMUSG00000064382 | -4,58E-01 | 0,896545451  | 4,54E+00 | 3,31E-02 | 2,13E-01 | Gm26447       | 0,73 | No  |
| ENSMUSG00000064387 | -2,54E-01 | -0,998004409 | 3,41E-01 | 5,59E-01 | 8,22E-01 | Snora73a      | 0,84 | No  |
| ENSMUSG00000064389 | 1,89E-01  | -1,997987319 | 5,31E-02 | 8,18E-01 | 9,70E-01 | Gm26446       | 1,14 | No  |
| ENSMUSG00000064390 | -2,98E-01 | -0,205774779 | 8,04E-01 | 3,70E-01 | 6,71E-01 | Rnu73b        | 0,81 | No  |
| ENSMUSG00000064399 | 2,65E+00  | -3,033655087 | 2,73E+00 | 9,86E-02 | 3,91E-01 | Gm23629       | 6,30 | No  |
| ENSMUSG00000064405 | -4,16E-01 | -0,943234464 | 9,00E-01 | 3,43E-01 | 6,43E-01 | Gm23925       | 0,75 | No  |
| ENSMUSG00000064409 | 9,29E-01  | -1,946172527 | 1,79E+00 | 1,81E-01 | 5,42E-01 | n-R5s40       | 1,90 | No  |
| ENSMUSG00000064410 | 3,55E-01  | -2,233298471 | 1,94E-01 | 6,59E-01 | 8,81E-01 | Gm22247       | 1,28 | No  |
| ENSMUSG00000064412 | 1,08E+00  | -2,548266829 | 1,11E+00 | 2,92E-01 | 5,87E-01 | Gm22246       | 2,12 | No  |
| ENSMUSG00000064414 | -2,68E-02 | -1,289540813 | 2,65E-03 | 9,59E-01 | 1,00E+00 | n-R5s215      | 0,98 | No  |
| ENSMUSG00000064419 | -5,42E-01 | 0,409661081  | 4,29E+00 | 3,82E-02 | 2,32E-01 | Gm22249       | 0,69 | No  |
| ENSMUSG00000064422 | -7,79E-02 | -2,831996442 | 2,57E-03 | 9,60E-01 | 1,00E+00 | Gm22502       | 0,95 | No  |
| ENSMUSG00000064427 | -2,13E-01 | 0,839147171  | 9,15E-01 | 3,39E-01 | 6,39E-01 | Gm22748       | 0,86 | No  |
| ENSMUSG00000064435 | -1,89E-01 | -1,205793515 | 1,69E-01 | 6,81E-01 | 8,94E-01 | Gm25588       | 0,88 | No  |
| ENSMUSG00000064437 | 6,21E-02  | -0,061167877 | 4,38E-02 | 8,34E-01 | 9,79E-01 | Snord49b      | 1,04 | No  |
| ENSMUSG00000064440 | 2,35E-01  | -0,529067482 | 3,95E-01 | 5,30E-01 | 8,05E-01 | Gm26224       | 1,18 | No  |
| ENSMUSG00000064441 | 3,34E-01  | -0,634421231 | 7,46E-01 | 3,88E-01 | 6,88E-01 | Snord37       | 1,26 | No  |
| ENSMUSG00000064443 | 2,74E-02  | -3,033621357 | 9,16E-12 | 1,00E+00 | 1,00E+00 | Gm26226       | 1,02 | No  |
| ENSMUSG00000064450 | 2,74E-01  | -1,54824226  | 2,36E-01 | 6,27E-01 | 8,61E-01 | Snord68       | 1,21 | No  |
| ENSMUSG00000064451 | 2,63E-01  | -1,322251273 | 2,88E-01 | 5,91E-01 | 8,42E-01 | Snora23       | 1,20 | No  |
| ENSMUSG00000064453 | -1,91E-01 | -0,09805557  | 3,80E-01 | 5,37E-01 | 8,09E-01 | Snord21       | 0,88 | No  |
| ENSMUSG00000064468 | 1,87E+00  | -3,107639691 | 1,38E+00 | 2,40E-01 | 5,50E-01 | Gm25081       | 3,67 | No  |
| ENSMUSG00000064489 | 1,87E+00  | -3,03364371  | 1,36E+00 | 2,43E-01 | 5,50E-01 | Gm23296       | 3,66 | No  |
| ENSMUSG00000064491 | 1,33E-02  | -1,401308461 | 6,37E-04 | 9,80E-01 | 1,00E+00 | Gm22061       | 1,01 | No  |

|                    |           |              |          |          |          |          |      |     |
|--------------------|-----------|--------------|----------|----------|----------|----------|------|-----|
| ENSMUSG00000064492 | -3,55E-01 | -2,311039685 | 1,59E-01 | 6,90E-01 | 8,99E-01 | Gm22060  | 0,78 | No  |
| ENSMUSG00000064493 | 3,27E-01  | 1,952957763  | 4,38E+00 | 3,63E-02 | 2,26E-01 | Snora28  | 1,25 | No  |
| ENSMUSG00000064494 | -5,20E-01 | -1,205831944 | 1,10E+00 | 2,95E-01 | 5,91E-01 | Gm22063  | 0,70 | No  |
| ENSMUSG00000064495 | 1,14E+00  | -1,740953158 | 3,55E+00 | 5,96E-02 | 3,02E-01 | Gm24313  | 2,20 | No  |
| ENSMUSG00000064500 | -5,22E-01 | -0,896139393 | 1,64E+00 | 2,01E-01 | 5,50E-01 | Gm25296  | 0,70 | No  |
| ENSMUSG00000064508 | -1,89E+00 | -3,1076441   | 1,42E+00 | 2,33E-01 | 5,50E-01 | n-R5s96  | 0,27 | No  |
| ENSMUSG00000064513 | -1,32E-01 | -0,015688825 | 2,00E-01 | 6,55E-01 | 8,79E-01 | Snora9   | 0,91 | No  |
| ENSMUSG00000064514 | 1,78E-01  | -0,093439553 | 3,08E-01 | 5,79E-01 | 8,36E-01 | Gm22455  | 1,13 | No  |
| ENSMUSG00000064525 | 1,17E+00  | -1,801057213 | 3,04E+00 | 8,12E-02 | 3,66E-01 | Gm26440  | 2,24 | No  |
| ENSMUSG00000064540 | -4,90E-01 | -2,472393727 | 2,49E-01 | 6,17E-01 | 8,55E-01 | Snord42a | 0,71 | No  |
| ENSMUSG00000064542 | 1,73E+00  | -1,946236371 | 5,41E+00 | 2,01E-02 | 1,51E-01 | Gm22980  | 3,32 | No  |
| ENSMUSG00000064550 | -4,10E-01 | -2,548172971 | 1,72E-01 | 6,78E-01 | 8,92E-01 | Gm24623  | 0,75 | No  |
| ENSMUSG00000064558 | 1,84E-01  | -2,311233088 | 5,03E-02 | 8,22E-01 | 9,72E-01 | Gm24620  | 1,14 | No  |
| ENSMUSG00000064563 | -1,09E+00 | -0,136162056 | 1,29E+01 | 3,20E-04 | 6,39E-03 | Snora7a  | 0,47 | Yes |
| ENSMUSG00000064565 | -4,13E-01 | -2,355563159 | 1,74E-01 | 6,76E-01 | 8,91E-01 | Gm24145  | 0,75 | No  |
| ENSMUSG00000064566 | -6,43E-02 | -2,83202899  | 2,81E-03 | 9,58E-01 | 1,00E+00 | Gm24144  | 0,96 | No  |
| ENSMUSG00000064567 | 1,81E+00  | -3,10765737  | 1,28E+00 | 2,58E-01 | 5,50E-01 | Gm24143  | 3,49 | No  |
| ENSMUSG00000064570 | -2,68E+00 | -2,963200749 | 2,85E+00 | 9,14E-02 | 3,82E-01 | Gm25800  | 0,16 | No  |
| ENSMUSG00000064573 | -1,94E+00 | -3,107619243 | 1,50E+00 | 2,21E-01 | 5,50E-01 | Gm25802  | 0,26 | No  |
| ENSMUSG00000064580 | 1,89E+00  | -3,033614598 | 1,38E+00 | 2,40E-01 | 5,50E-01 | Gm25134  | 3,70 | No  |
| ENSMUSG00000064585 | -8,55E-01 | -2,963271948 | 4,02E-01 | 5,26E-01 | 8,03E-01 | Gm25129  | 0,55 | No  |
| ENSMUSG00000064587 | -1,02E+00 | -2,107625456 | 1,95E+00 | 1,62E-01 | 5,12E-01 | Gm25131  | 0,49 | No  |
| ENSMUSG00000064590 | 2,18E-01  | -2,401380721 | 5,98E-02 | 8,07E-01 | 9,64E-01 | Gm22301  | 1,16 | No  |
| ENSMUSG00000064595 | -7,17E-01 | -2,146166148 | 8,73E-01 | 3,50E-01 | 6,51E-01 | Gm22300  | 0,61 | No  |
| ENSMUSG00000064597 | 1,88E+00  | -2,963229875 | 1,37E+00 | 2,42E-01 | 5,50E-01 | Gm22299  | 3,68 | No  |
| ENSMUSG00000064600 | 4,27E-01  | -2,655157011 | 1,42E-01 | 7,06E-01 | 9,08E-01 | Gm25636  | 1,34 | No  |
| ENSMUSG00000064602 | -2,53E-01 | -0,099716251 | 6,74E-01 | 4,12E-01 | 7,07E-01 | Snora41  | 0,84 | No  |
| ENSMUSG00000064604 | -5,88E-01 | -1,189204024 | 1,64E+00 | 2,00E-01 | 5,50E-01 | Snora44  | 0,67 | No  |
| ENSMUSG00000064606 | 1,89E+00  | -3,033614598 | 1,38E+00 | 2,40E-01 | 5,50E-01 | Gm25899  | 3,70 | No  |
| ENSMUSG00000064612 | -9,36E-02 | -1,098177709 | 4,20E-02 | 8,38E-01 | 9,82E-01 | Gm26457  | 0,94 | No  |
| ENSMUSG00000064620 | -1,90E+00 | -3,033594154 | 1,44E+00 | 2,30E-01 | 5,50E-01 | Gm22303  | 0,27 | No  |
| ENSMUSG00000064622 | 1,36E+00  | -2,600713657 | 1,91E+00 | 1,67E-01 | 5,21E-01 | Gm22304  | 2,57 | No  |

|                    |           |              |           |          |          |          |      |    |
|--------------------|-----------|--------------|-----------|----------|----------|----------|------|----|
| ENSMUSG00000064624 | -5,78E-02 | -2,896167382 | 2,23E-03  | 9,62E-01 | 1,00E+00 | Gm22305  | 0,96 | No |
| ENSMUSG00000064634 | -3,22E-01 | -1,170664483 | 4,75E-01  | 4,90E-01 | 7,77E-01 | Gm22620  | 0,80 | No |
| ENSMUSG00000064637 | -4,60E-01 | -0,344274392 | 1,77E+00  | 1,83E-01 | 5,46E-01 | Snora20  | 0,73 | No |
| ENSMUSG00000064644 | 1,62E-03  | -2,963242114 | -1,56E-12 | 1,00E+00 | 1,00E+00 | Gm23302  | 1,00 | No |
| ENSMUSG00000064646 | -7,59E-02 | -2,71173022  | 3,14E-03  | 9,55E-01 | 1,00E+00 | Gm23300  | 0,95 | No |
| ENSMUSG00000064647 | -2,10E-01 | 0,169476136  | 5,50E-01  | 4,58E-01 | 7,47E-01 | Gm23301  | 0,86 | No |
| ENSMUSG00000064648 | 7,60E-01  | -2,831984587 | 3,14E-01  | 5,75E-01 | 8,34E-01 | Gm23303  | 1,69 | No |
| ENSMUSG00000064652 | -1,90E+00 | -3,033647263 | 1,44E+00  | 2,30E-01 | 5,50E-01 | Gm24165  | 0,27 | No |
| ENSMUSG00000064653 | -5,88E-02 | -3,033652696 | 1,62E-03  | 9,68E-01 | 1,00E+00 | Gm26129  | 0,96 | No |
| ENSMUSG00000064655 | 3,54E-01  | -1,816439372 | 2,66E-01  | 6,06E-01 | 8,49E-01 | Gm25788  | 1,28 | No |
| ENSMUSG00000064658 | -1,88E+00 | -2,832021709 | 1,42E+00  | 2,34E-01 | 5,50E-01 | Gm24166  | 0,27 | No |
| ENSMUSG00000064663 | -5,84E-01 | -2,711698733 | 2,68E-01  | 6,05E-01 | 8,49E-01 | Gm24859  | 0,67 | No |
| ENSMUSG00000064666 | -1,84E-01 | -0,389799284 | 3,07E-01  | 5,80E-01 | 8,36E-01 | Snora52  | 0,88 | No |
| ENSMUSG00000064672 | 3,69E-02  | -0,024705692 | 1,63E-02  | 8,99E-01 | 1,00E+00 | Gm22806  | 1,03 | No |
| ENSMUSG00000064696 | 1,04E+00  | -2,152404516 | 1,88E+00  | 1,71E-01 | 5,26E-01 | Gm24148  | 2,05 | No |
| ENSMUSG00000064702 | -5,71E-02 | -2,655159966 | 2,22E-03  | 9,62E-01 | 1,00E+00 | Gm24950  | 0,96 | No |
| ENSMUSG00000064704 | 4,74E-01  | -2,107634546 | 3,05E-01  | 5,81E-01 | 8,37E-01 | n-R5s180 | 1,39 | No |
| ENSMUSG00000064721 | -9,08E-02 | -0,417034053 | 6,73E-02  | 7,95E-01 | 9,57E-01 | Gm25855  | 0,94 | No |
| ENSMUSG00000064722 | 9,01E-03  | -3,107646452 | -5,16E-10 | 1,00E+00 | 1,00E+00 | Gm25857  | 1,01 | No |
| ENSMUSG00000064725 | -8,05E-02 | 1,183628591  | 1,67E-01  | 6,83E-01 | 8,95E-01 | Snord96a | 0,95 | No |
| ENSMUSG00000064731 | -2,57E-01 | -0,697297472 | 4,43E-01  | 5,06E-01 | 7,90E-01 | Snord45b | 0,84 | No |
| ENSMUSG00000064741 | 1,84E-01  | 0,03531947   | 4,19E-01  | 5,17E-01 | 7,98E-01 | Snord14a | 1,14 | No |
| ENSMUSG00000064751 | 1,02E-01  | -1,051828613 | 5,03E-02  | 8,22E-01 | 9,72E-01 | Gm26330  | 1,07 | No |
| ENSMUSG00000064758 | -1,71E+00 | -2,655089183 | 2,04E+00  | 1,53E-01 | 4,96E-01 | Gm26331  | 0,30 | No |
| ENSMUSG00000064765 | 1,76E-01  | -2,683122004 | 2,64E-02  | 8,71E-01 | 1,00E+00 | Gm26456  | 1,13 | No |
| ENSMUSG00000064767 | 1,45E-01  | -1,664274041 | 6,50E-02  | 7,99E-01 | 9,59E-01 | Snord35b | 1,11 | No |
| ENSMUSG00000064768 | -1,17E+00 | -2,963257985 | 5,98E-01  | 4,39E-01 | 7,32E-01 | Snord60  | 0,44 | No |
| ENSMUSG00000064769 | -1,94E+00 | -3,107619243 | 1,50E+00  | 2,21E-01 | 5,50E-01 | Gm23518  | 0,26 | No |
| ENSMUSG00000064770 | 9,77E-01  | -0,98939522  | 5,22E+00  | 2,24E-02 | 1,62E-01 | n-R5s29  | 1,97 | No |
| ENSMUSG00000064778 | -4,28E-01 | -0,131565267 | 1,82E+00  | 1,77E-01 | 5,37E-01 | Snord59a | 0,74 | No |
| ENSMUSG00000064780 | 3,44E-01  | -0,763200302 | 7,32E-01  | 3,92E-01 | 6,92E-01 | Snord95  | 1,27 | No |
| ENSMUSG00000064791 | 4,69E-01  | -1,378268529 | 7,95E-01  | 3,73E-01 | 6,74E-01 | Snord14e | 1,38 | No |

|                    |           |              |           |          |          |          |      |     |
|--------------------|-----------|--------------|-----------|----------|----------|----------|------|-----|
| ENSMUSG00000064792 | -2,35E+00 | -2,896127955 | 2,16E+00  | 1,41E-01 | 4,75E-01 | Gm24355  | 0,20 | No  |
| ENSMUSG00000064796 | -7,96E-02 | -2,655170372 | 7,35E-03  | 9,32E-01 | 1,00E+00 | Terc     | 0,95 | No  |
| ENSMUSG00000064797 | -2,25E-01 | 0,053928007  | 5,48E-01  | 4,59E-01 | 7,48E-01 | Gm24357  | 0,86 | No  |
| ENSMUSG00000064805 | 1,85E+00  | -3,107657832 | 1,35E+00  | 2,46E-01 | 5,50E-01 | Gm24037  | 3,61 | No  |
| ENSMUSG00000064811 | 5,03E-01  | -2,070253202 | 4,90E-01  | 4,84E-01 | 7,71E-01 | Gm22358  | 1,42 | No  |
| ENSMUSG00000064814 | 1,87E+00  | -3,107639691 | 1,38E+00  | 2,40E-01 | 5,50E-01 | Gm23939  | 3,67 | No  |
| ENSMUSG00000064816 | 1,32E-01  | 1,088651528  | 4,32E-01  | 5,11E-01 | 7,94E-01 | Gm22357  | 1,10 | No  |
| ENSMUSG00000064823 | 6,51E-01  | -2,740902294 | 3,51E-01  | 5,54E-01 | 8,19E-01 | Snord82  | 1,57 | No  |
| ENSMUSG00000064829 | -3,66E-01 | -0,632087833 | 9,79E-01  | 3,22E-01 | 6,23E-01 | Gm22879  | 0,78 | No  |
| ENSMUSG00000064833 | -3,57E+00 | -2,831989825 | 5,72E+00  | 1,68E-02 | 1,35E-01 | Gm25926  | 0,08 | No  |
| ENSMUSG00000064837 | -2,68E-01 | -0,34432397  | 6,23E-01  | 4,30E-01 | 7,23E-01 | Snora75  | 0,83 | No  |
| ENSMUSG00000064841 | -6,33E-01 | -0,855601695 | 2,49E+00  | 1,15E-01 | 4,19E-01 | Gm26205  | 0,64 | No  |
| ENSMUSG00000064844 | 8,08E-03  | 0,028180656  | 8,47E-04  | 9,77E-01 | 1,00E+00 | Gm26202  | 1,01 | No  |
| ENSMUSG00000064845 | 1,79E+00  | -1,711732058 | 8,02E+00  | 4,64E-03 | 5,28E-02 | Gm26203  | 3,45 | No  |
| ENSMUSG00000064850 | -2,68E+00 | -3,033645766 | 2,84E+00  | 9,17E-02 | 3,82E-01 | Gm23443  | 0,16 | No  |
| ENSMUSG00000064853 | -1,61E+00 | -1,497402448 | 8,52E+00  | 3,52E-03 | 4,31E-02 | Gm23442  | 0,33 | Yes |
| ENSMUSG00000064856 | 1,23E+00  | -2,711717536 | 9,32E-01  | 3,34E-01 | 6,35E-01 | Gm23444  | 2,34 | No  |
| ENSMUSG00000064858 | 6,23E-01  | -1,963311701 | 9,01E-01  | 3,43E-01 | 6,43E-01 | Snora43  | 1,54 | No  |
| ENSMUSG00000064859 | -1,24E+00 | -2,448683335 | 1,47E+00  | 2,25E-01 | 5,50E-01 | Gm24524  | 0,42 | No  |
| ENSMUSG00000064867 | 1,81E+00  | -3,10765737  | 1,28E+00  | 2,58E-01 | 5,50E-01 | Gm25039  | 3,49 | No  |
| ENSMUSG00000064871 | -5,54E-01 | -0,387852924 | 2,76E+00  | 9,69E-02 | 3,88E-01 | Snord58b | 0,68 | No  |
| ENSMUSG00000064880 | -1,82E-01 | 1,757074593  | 1,25E+00  | 2,63E-01 | 5,58E-01 | Gm24201  | 0,88 | No  |
| ENSMUSG00000064887 | 1,92E+00  | -2,711774895 | 2,75E+00  | 9,72E-02 | 3,89E-01 | Gm24205  | 3,78 | No  |
| ENSMUSG00000064890 | -5,23E-02 | -2,963273906 | 1,24E-03  | 9,72E-01 | 1,00E+00 | Gm22505  | 0,96 | No  |
| ENSMUSG00000064897 | -6,51E-03 | -3,033622701 | 4,10E-05  | 9,95E-01 | 1,00E+00 | Gm22504  | 1,00 | No  |
| ENSMUSG00000064899 | -3,18E+00 | -2,963258684 | 4,26E+00  | 3,90E-02 | 2,34E-01 | Snord118 | 0,11 | No  |
| ENSMUSG00000064900 | 9,01E-03  | -3,107646452 | -5,16E-10 | 1,00E+00 | 1,00E+00 | Gm25402  | 1,01 | No  |
| ENSMUSG00000064901 | -3,19E-01 | -0,725875113 | 5,55E-01  | 4,56E-01 | 7,45E-01 | Snora21  | 0,80 | No  |
| ENSMUSG00000064906 | 6,94E-01  | -2,89617475  | 2,61E-01  | 6,09E-01 | 8,51E-01 | n-R5s204 | 1,62 | No  |
| ENSMUSG00000064907 | -1,26E+00 | -2,497569017 | 1,51E+00  | 2,19E-01 | 5,50E-01 | Gm25405  | 0,42 | No  |
| ENSMUSG00000064916 | -8,19E-01 | -2,033601249 | 9,78E-01  | 3,23E-01 | 6,23E-01 | Gm22573  | 0,57 | No  |
| ENSMUSG00000064917 | -2,07E-02 | -0,430839664 | 3,58E-03  | 9,52E-01 | 1,00E+00 | Gm22574  | 0,99 | No  |

|                    |           |              |           |          |          |          |      |    |
|--------------------|-----------|--------------|-----------|----------|----------|----------|------|----|
| ENSMUSG00000064918 | 3,21E-01  | 0,915851923  | 2,15E+00  | 1,42E-01 | 4,77E-01 | Gm22571  | 1,25 | No |
| ENSMUSG00000064919 | -7,54E-01 | -1,070173758 | 2,84E+00  | 9,18E-02 | 3,82E-01 | Gm22572  | 0,59 | No |
| ENSMUSG00000064923 | -1,94E+00 | -3,107619243 | 1,50E+00  | 2,21E-01 | 5,50E-01 | Gm22042  | 0,26 | No |
| ENSMUSG00000064925 | -1,57E-02 | -1,509959367 | 9,57E-04  | 9,75E-01 | 1,00E+00 | Snora62  | 0,99 | No |
| ENSMUSG00000064927 | -7,53E-02 | -2,770585454 | 3,83E-03  | 9,51E-01 | 1,00E+00 | Gm22043  | 0,95 | No |
| ENSMUSG00000064930 | 1,75E-01  | -2,683175171 | 2,26E-02  | 8,80E-01 | 1,00E+00 | Gm23723  | 1,13 | No |
| ENSMUSG00000064936 | -3,26E-01 | 0,095818316  | 1,28E+00  | 2,58E-01 | 5,50E-01 | Gm23722  | 0,80 | No |
| ENSMUSG00000064938 | 4,28E-02  | -1,692613142 | 4,39E-03  | 9,47E-01 | 1,00E+00 | Mir3068  | 1,03 | No |
| ENSMUSG00000064941 | -1,86E+00 | -3,033612668 | 1,39E+00  | 2,38E-01 | 5,50E-01 | Gm23238  | 0,28 | No |
| ENSMUSG00000064945 | -3,83E-02 | -3,107651936 | -7,91E-11 | 1,00E+00 | 1,00E+00 | Rny3     | 0,97 | No |
| ENSMUSG00000064949 | 2,17E-01  | -0,949224386 | 2,60E-01  | 6,10E-01 | 8,51E-01 | Snora61  | 1,16 | No |
| ENSMUSG00000064952 | -2,71E+00 | -2,89615606  | 2,90E+00  | 8,84E-02 | 3,79E-01 | Gm24920  | 0,15 | No |
| ENSMUSG00000064956 | -8,80E-01 | -2,963222719 | 4,28E-01  | 5,13E-01 | 7,95E-01 | Gm24918  | 0,54 | No |
| ENSMUSG00000064959 | -2,63E-02 | -3,033641358 | 2,33E-04  | 9,88E-01 | 1,00E+00 | n-R5s41  | 0,98 | No |
| ENSMUSG00000064960 | -3,71E-01 | -2,448645529 | 1,73E-01  | 6,78E-01 | 8,92E-01 | Gm24406  | 0,77 | No |
| ENSMUSG00000064964 | -6,21E-01 | -2,448646108 | 5,25E-01  | 4,69E-01 | 7,57E-01 | Gm25147  | 0,65 | No |
| ENSMUSG00000064966 | -3,37E-01 | -0,824076719 | 7,51E-01  | 3,86E-01 | 6,87E-01 | Snord15b | 0,79 | No |
| ENSMUSG00000064968 | -1,77E-01 | -0,26874873  | 2,74E-01  | 6,01E-01 | 8,47E-01 | Snord47  | 0,88 | No |
| ENSMUSG00000064970 | 1,18E+00  | -2,998025243 | 6,58E-01  | 4,17E-01 | 7,12E-01 | Gm23690  | 2,26 | No |
| ENSMUSG00000064984 | 5,40E-01  | -0,929340753 | 1,63E+00  | 2,01E-01 | 5,50E-01 | Snord73a | 1,45 | No |
| ENSMUSG00000064987 | -5,88E-02 | -3,033616507 | 1,62E-03  | 9,68E-01 | 1,00E+00 | Gm25260  | 0,96 | No |
| ENSMUSG00000064994 | -4,67E-02 | -2,711733432 | 1,50E-03  | 9,69E-01 | 1,00E+00 | Gm22422  | 0,97 | No |
| ENSMUSG00000064995 | -1,69E-01 | -0,221024421 | 2,71E-01  | 6,03E-01 | 8,48E-01 | Gm26003  | 0,89 | No |
| ENSMUSG00000065006 | 7,14E-01  | -2,863747814 | 2,78E-01  | 5,98E-01 | 8,45E-01 | Gm26325  | 1,64 | No |
| ENSMUSG00000065016 | -1,24E-01 | 0,222195326  | 2,05E-01  | 6,51E-01 | 8,76E-01 | Snora3   | 0,92 | No |
| ENSMUSG00000065034 | -1,89E+00 | -3,033648118 | 1,42E+00  | 2,33E-01 | 5,50E-01 | Gm22363  | 0,27 | No |
| ENSMUSG00000065036 | -7,59E-01 | 0,136821453  | 6,72E+00  | 9,54E-03 | 9,00E-02 | Gm22362  | 0,59 | No |
| ENSMUSG00000065037 | -8,44E-01 | -0,378268058 | 5,62E+00  | 1,78E-02 | 1,40E-01 | Rn7sk    | 0,56 | No |
| ENSMUSG00000065041 | 1,39E-01  | 0,218100209  | 2,67E-01  | 6,05E-01 | 8,49E-01 | Gm24044  | 1,10 | No |
| ENSMUSG00000065044 | 1,21E+00  | -2,998005207 | 6,74E-01  | 4,12E-01 | 7,07E-01 | n-R5s169 | 2,32 | No |
| ENSMUSG00000065047 | -8,69E-01 | -2,963204587 | 4,16E-01  | 5,19E-01 | 7,98E-01 | Gm24045  | 0,55 | No |
| ENSMUSG00000065049 | -4,61E-02 | -2,831979911 | 9,96E-04  | 9,75E-01 | 1,00E+00 | Gm24041  | 0,97 | No |

|                    |           |              |           |          |          |          |       |     |
|--------------------|-----------|--------------|-----------|----------|----------|----------|-------|-----|
| ENSMUSG00000065057 | -3,19E+00 | -2,770490475 | 4,29E+00  | 3,83E-02 | 2,32E-01 | Gm25703  | 0,11  | No  |
| ENSMUSG00000065061 | -8,39E-02 | -2,600654908 | 4,63E-03  | 9,46E-01 | 1,00E+00 | Gm22884  | 0,94  | No  |
| ENSMUSG00000065072 | -1,87E+00 | -3,107637761 | 1,39E+00  | 2,38E-01 | 5,50E-01 | Gm24533  | 0,27  | No  |
| ENSMUSG00000065078 | 1,17E+00  | -3,14612376  | 6,40E-01  | 4,24E-01 | 7,18E-01 | Gm24536  | 2,26  | No  |
| ENSMUSG00000065080 | -1,89E+00 | -3,1076441   | 1,42E+00  | 2,33E-01 | 5,50E-01 | Gm26497  | 0,27  | No  |
| ENSMUSG00000065083 | 1,85E+00  | -3,107657832 | 1,35E+00  | 2,46E-01 | 5,50E-01 | n-R5s205 | 3,61  | No  |
| ENSMUSG00000065084 | -6,03E-02 | -2,548233673 | 4,16E-03  | 9,49E-01 | 1,00E+00 | Gm26496  | 0,96  | No  |
| ENSMUSG00000065087 | 3,21E-01  | 0,815078896  | 2,14E+00  | 1,44E-01 | 4,79E-01 | Snord22  | 1,25  | No  |
| ENSMUSG00000065089 | -6,97E-01 | -0,99809249  | 2,67E+00  | 1,02E-01 | 3,95E-01 | Gm26493  | 0,62  | No  |
| ENSMUSG00000065094 | -2,05E-01 | -0,896037294 | 2,25E-01  | 6,35E-01 | 8,67E-01 | Snord1a  | 0,87  | No  |
| ENSMUSG00000065097 | -6,79E-01 | -1,869451355 | 9,55E-01  | 3,29E-01 | 6,29E-01 | Snora16a | 0,62  | No  |
| ENSMUSG00000065105 | -4,39E-01 | 0,804528467  | 3,83E+00  | 5,04E-02 | 2,72E-01 | Gm26130  | 0,74  | No  |
| ENSMUSG00000065107 | 9,01E-03  | -3,107646452 | -5,16E-10 | 1,00E+00 | 1,00E+00 | n-R5s88  | 1,01  | No  |
| ENSMUSG00000065118 | 2,36E-01  | -2,033521005 | 7,00E-02  | 7,91E-01 | 9,55E-01 | Gm23297  | 1,18  | No  |
| ENSMUSG00000065124 | -3,63E-01 | 0,758491479  | 2,38E+00  | 1,23E-01 | 4,39E-01 | Snora65  | 0,78  | No  |
| ENSMUSG00000065126 | -5,49E-01 | -0,088495588 | 3,36E+00  | 6,66E-02 | 3,25E-01 | Snord104 | 0,68  | No  |
| ENSMUSG00000065127 | -5,88E-02 | -3,033616507 | 1,62E-03  | 9,68E-01 | 1,00E+00 | Gm26127  | 0,96  | No  |
| ENSMUSG00000065130 | -4,84E-01 | -1,26811372  | 1,00E+00  | 3,16E-01 | 6,17E-01 | Gm24457  | 0,72  | No  |
| ENSMUSG00000065132 | -3,83E-02 | -3,107651936 | -7,91E-11 | 1,00E+00 | 1,00E+00 | Gm24456  | 0,97  | No  |
| ENSMUSG00000065138 | 4,45E-01  | -2,600667498 | 1,54E-01  | 6,94E-01 | 9,02E-01 | Gm24458  | 1,36  | No  |
| ENSMUSG00000065145 | -9,34E-01 | -2,600635012 | 7,64E-01  | 3,82E-01 | 6,83E-01 | Vaultrc5 | 0,52  | No  |
| ENSMUSG00000065147 | 4,13E-01  | 0,563791237  | 2,85E+00  | 9,16E-02 | 3,82E-01 | Snora31  | 1,33  | No  |
| ENSMUSG00000065158 | -8,86E-01 | -1,14613865  | 3,37E+00  | 6,65E-02 | 3,24E-01 | Gm25483  | 0,54  | No  |
| ENSMUSG00000065159 | -1,89E+00 | -3,1076441   | 1,42E+00  | 2,33E-01 | 5,50E-01 | Gm25482  | 0,27  | No  |
| ENSMUSG00000065160 | 4,74E-01  | -0,351959469 | 1,77E+00  | 1,83E-01 | 5,46E-01 | Mir5117  | 1,39  | No  |
| ENSMUSG00000065162 | -5,23E-01 | -1,929335812 | 4,38E-01  | 5,08E-01 | 7,92E-01 | Gm23645  | 0,70  | No  |
| ENSMUSG00000065164 | -7,38E-02 | -3,033634644 | 2,66E-03  | 9,59E-01 | 1,00E+00 | Gm23814  | 0,95  | No  |
| ENSMUSG00000065165 | 1,85E+00  | -3,107657832 | 1,35E+00  | 2,46E-01 | 5,50E-01 | Gm23815  | 3,61  | No  |
| ENSMUSG00000065176 | 1,79E+00  | -3,033666867 | 1,28E+00  | 2,58E-01 | 5,50E-01 | Rnu12    | 3,46  | No  |
| ENSMUSG00000065191 | -9,49E-02 | -2,448698919 | 8,06E-03  | 9,28E-01 | 1,00E+00 | Gm23458  | 0,94  | No  |
| ENSMUSG00000065196 | 4,61E+00  | -2,497672957 | 1,20E+01  | 5,26E-04 | 9,55E-03 | Snord85  | 24,38 | Yes |
| ENSMUSG00000065200 | 1,17E+00  | -3,14612376  | 6,40E-01  | 4,24E-01 | 7,18E-01 | Gm24613  | 2,26  | No  |

|                    |           |              |           |          |          |          |      |    |
|--------------------|-----------|--------------|-----------|----------|----------|----------|------|----|
| ENSMUSG00000065202 | -2,71E+00 | -3,033620915 | 2,92E+00  | 8,75E-02 | 3,78E-01 | Gm24615  | 0,15 | No |
| ENSMUSG00000065204 | -1,51E+00 | -1,863510226 | 5,00E+00  | 2,54E-02 | 1,77E-01 | Gm24610  | 0,35 | No |
| ENSMUSG00000065206 | 3,14E-02  | -3,107617333 | -7,69E-10 | 1,00E+00 | 1,00E+00 | Gm24611  | 1,02 | No |
| ENSMUSG00000065208 | -2,83E-01 | 0,392835235  | 1,23E+00  | 2,67E-01 | 5,63E-01 | Gm24616  | 0,82 | No |
| ENSMUSG00000065211 | -1,37E+00 | -1,785633929 | 4,00E+00  | 4,54E-02 | 2,54E-01 | Gm26265  | 0,39 | No |
| ENSMUSG00000065219 | -5,42E-01 | -1,027641447 | 1,53E+00  | 2,15E-01 | 5,50E-01 | Snord32a | 0,69 | No |
| ENSMUSG00000065226 | -1,12E-01 | -0,352746163 | 1,14E-01  | 7,35E-01 | 9,24E-01 | Gm25791  | 0,93 | No |
| ENSMUSG00000065227 | -9,76E-01 | -2,548197577 | 8,35E-01  | 3,61E-01 | 6,62E-01 | Gm25790  | 0,51 | No |
| ENSMUSG00000065228 | -4,34E-01 | -0,912321046 | 9,55E-01  | 3,28E-01 | 6,29E-01 | Gm25789  | 0,74 | No |
| ENSMUSG00000065231 | -2,27E-01 | 1,030615332  | 1,16E+00  | 2,81E-01 | 5,78E-01 | Gm22972  | 0,85 | No |
| ENSMUSG00000065236 | 4,51E-01  | -1,226409076 | 9,59E-01  | 3,27E-01 | 6,28E-01 | n-R5s197 | 1,37 | No |
| ENSMUSG00000065245 | -4,62E-02 | -2,711661418 | 1,47E-03  | 9,69E-01 | 1,00E+00 | Gm22295  | 0,97 | No |
| ENSMUSG00000065246 | -7,59E-01 | -2,31116704  | 6,45E-01  | 4,22E-01 | 7,17E-01 | Gm22297  | 0,59 | No |
| ENSMUSG00000065251 | -5,88E-01 | -2,655173593 | 2,71E-01  | 6,03E-01 | 8,48E-01 | Gm23971  | 0,67 | No |
| ENSMUSG00000065258 | -2,64E-01 | -0,252259881 | 7,08E-01  | 4,00E-01 | 6,99E-01 | Gm23969  | 0,83 | No |
| ENSMUSG00000065259 | 2,62E-01  | -1,126860467 | 2,86E-01  | 5,93E-01 | 8,42E-01 | Snora30  | 1,20 | No |
| ENSMUSG00000065262 | -3,20E+00 | -2,711686274 | 4,32E+00  | 3,77E-02 | 2,31E-01 | Gm23451  | 0,11 | No |
| ENSMUSG00000065265 | -5,29E-01 | 0,484790934  | 4,54E+00  | 3,32E-02 | 2,13E-01 | Gm23455  | 0,69 | No |
| ENSMUSG00000065270 | -5,63E-01 | -2,770594051 | 2,48E-01  | 6,19E-01 | 8,56E-01 | Gm25127  | 0,68 | No |
| ENSMUSG00000065272 | -9,10E-02 | -0,638965205 | 5,84E-02  | 8,09E-01 | 9,65E-01 | Snord57  | 0,94 | No |
| ENSMUSG00000065273 | -5,25E-01 | -1,333113746 | 1,05E+00  | 3,05E-01 | 6,01E-01 | Gm25128  | 0,69 | No |
| ENSMUSG00000065280 | 1,47E-01  | -0,702169532 | 1,47E-01  | 7,01E-01 | 9,05E-01 | Gm24453  | 1,11 | No |
| ENSMUSG00000065281 | 1,37E-01  | 0,61599306   | 3,29E-01  | 5,66E-01 | 8,28E-01 | Gm24452  | 1,10 | No |
| ENSMUSG00000065282 | -4,43E-01 | 0,015066227  | 2,13E+00  | 1,44E-01 | 4,80E-01 | Gm24455  | 0,74 | No |
| ENSMUSG00000065287 | -3,52E-01 | 0,095801514  | 1,47E+00  | 2,25E-01 | 5,50E-01 | Gm24451  | 0,78 | No |
| ENSMUSG00000065289 | 1,65E-01  | -0,19397428  | 2,56E-01  | 6,13E-01 | 8,53E-01 | Gm23650  | 1,12 | No |
| ENSMUSG00000065295 | -3,63E-01 | -0,063886197 | 1,49E+00  | 2,22E-01 | 5,50E-01 | Gm24134  | 0,78 | No |
| ENSMUSG00000065296 | -8,21E-01 | -2,963266074 | 3,67E-01  | 5,45E-01 | 8,13E-01 | Gm26122  | 0,57 | No |
| ENSMUSG00000065298 | -1,92E+00 | -3,0336536   | 1,46E+00  | 2,27E-01 | 5,50E-01 | Gm26121  | 0,26 | No |
| ENSMUSG00000065299 | -4,08E-02 | -2,963255775 | 7,59E-04  | 9,78E-01 | 1,00E+00 | Gm23138  | 0,97 | No |
| ENSMUSG00000065301 | 4,48E-01  | -2,655112357 | 1,57E-01  | 6,92E-01 | 9,00E-01 | Gm23248  | 1,36 | No |
| ENSMUSG00000065304 | -2,69E-01 | -0,580660564 | 5,65E-01  | 4,52E-01 | 7,42E-01 | Gm23245  | 0,83 | No |

|                    |           |              |           |          |          |           |      |    |
|--------------------|-----------|--------------|-----------|----------|----------|-----------|------|----|
| ENSMUSG00000065305 | -8,09E-02 | -0,26449972  | 5,87E-02  | 8,09E-01 | 9,65E-01 | Gm23246   | 0,95 | No |
| ENSMUSG00000065307 | 1,61E+00  | -2,832036347 | 1,77E+00  | 1,84E-01 | 5,47E-01 | Gm23247   | 3,04 | No |
| ENSMUSG00000065311 | 1,85E+00  | -3,107657832 | 1,35E+00  | 2,46E-01 | 5,50E-01 | n-R5s156  | 3,61 | No |
| ENSMUSG00000065315 | -6,68E-02 | -1,126646749 | 1,98E-02  | 8,88E-01 | 1,00E+00 | Gm26064   | 0,95 | No |
| ENSMUSG00000065331 | 3,14E-02  | -3,107617333 | -7,69E-10 | 1,00E+00 | 1,00E+00 | Gm24927   | 1,02 | No |
| ENSMUSG00000065336 | 8,67E-03  | -1,556961207 | 2,22E-04  | 9,88E-01 | 1,00E+00 | Snora34   | 1,01 | No |
| ENSMUSG00000065341 | 3,95E-01  | -2,311230521 | 2,49E-01  | 6,18E-01 | 8,55E-01 | Gm25579   | 1,31 | No |
| ENSMUSG00000065343 | 5,01E-01  | -1,683157186 | 6,30E-01  | 4,27E-01 | 7,21E-01 | Gm25580   | 1,41 | No |
| ENSMUSG00000065347 | 2,25E-01  | -2,497600741 | 6,38E-02  | 8,01E-01 | 9,61E-01 | Gm25583   | 1,17 | No |
| ENSMUSG00000065348 | 1,84E+00  | -3,033649193 | 1,33E+00  | 2,49E-01 | 5,50E-01 | Gm25577   | 3,58 | No |
| ENSMUSG00000065353 | -1,20E-01 | -0,349985415 | 1,21E-01  | 7,28E-01 | 9,20E-01 | Snora73b  | 0,92 | No |
| ENSMUSG00000065360 | -3,86E-01 | -2,070189232 | 3,46E-01  | 5,57E-01 | 8,21E-01 | Gm24412   | 0,77 | No |
| ENSMUSG00000065362 | -6,88E-02 | -1,268109869 | 1,83E-02  | 8,93E-01 | 1,00E+00 | Gm24411   | 0,95 | No |
| ENSMUSG00000065368 | 8,09E-01  | -2,600670938 | 5,70E-01  | 4,50E-01 | 7,40E-01 | Gm24414   | 1,75 | No |
| ENSMUSG00000065374 | 3,13E+00  | -2,770609441 | 4,01E+00  | 4,53E-02 | 2,54E-01 | Gm22738   | 8,78 | No |
| ENSMUSG00000065378 | 4,12E-01  | -0,159383033 | 1,60E+00  | 2,06E-01 | 5,50E-01 | Gm22744   | 1,33 | No |
| ENSMUSG00000065387 | -3,84E-01 | -2,40130776  | 1,86E-01  | 6,66E-01 | 8,86E-01 | n-R5s85   | 0,77 | No |
| ENSMUSG00000065389 | 2,27E-01  | -1,205853298 | 2,39E-01  | 6,25E-01 | 8,59E-01 | Gm23100   | 1,17 | No |
| ENSMUSG00000065392 | -3,15E-01 | -0,214203797 | 9,69E-01  | 3,25E-01 | 6,26E-01 | Gm25894   | 0,80 | No |
| ENSMUSG00000065394 | 1,47E-02  | -1,464901493 | 6,71E-04  | 9,79E-01 | 1,00E+00 | Mir25     | 1,01 | No |
| ENSMUSG00000065395 | 1,82E+00  | -3,033661385 | 1,31E+00  | 2,52E-01 | 5,50E-01 | Mir193a   | 3,54 | No |
| ENSMUSG00000065396 | -1,89E+00 | -3,1076441   | 1,42E+00  | 2,33E-01 | 5,50E-01 | Mir99b    | 0,27 | No |
| ENSMUSG00000065397 | -1,01E+00 | -1,257318426 | 4,11E+00  | 4,26E-02 | 2,45E-01 | Mir155    | 0,50 | No |
| ENSMUSG00000065399 | 2,49E-01  | -2,548215523 | 7,81E-02  | 7,80E-01 | 9,48E-01 | Mir133a-1 | 1,19 | No |
| ENSMUSG00000065401 | -1,94E+00 | -3,107619243 | 1,50E+00  | 2,21E-01 | 5,50E-01 | Mir144    | 0,26 | No |
| ENSMUSG00000065403 | -1,08E+00 | -2,514598921 | 1,34E+00  | 2,47E-01 | 5,50E-01 | Mir18     | 0,47 | No |
| ENSMUSG00000065406 | 2,93E-01  | -2,929296909 | 5,30E-02  | 8,18E-01 | 9,70E-01 | Mirlet7i  | 1,22 | No |
| ENSMUSG00000065407 | 8,73E-01  | -2,28949091  | 1,04E+00  | 3,07E-01 | 6,05E-01 | Mir135a-1 | 1,83 | No |
| ENSMUSG00000065409 | 1,22E+00  | -3,146114919 | 6,90E-01  | 4,06E-01 | 7,02E-01 | Mir30e    | 2,33 | No |
| ENSMUSG00000065412 | 5,06E-01  | -2,769993243 | 1,80E-01  | 6,71E-01 | 8,89E-01 | Mir29b-2  | 1,42 | No |
| ENSMUSG00000065413 | -5,90E-02 | -2,97498172  | 1,59E-03  | 9,68E-01 | 1,00E+00 | Mir367    | 0,96 | No |
| ENSMUSG00000065414 | 1,66E+00  | -2,896170739 | 1,34E+00  | 2,46E-01 | 5,50E-01 | Mir138-1  | 3,15 | No |



|                    |           |              |          |          |          |           |      |     |
|--------------------|-----------|--------------|----------|----------|----------|-----------|------|-----|
| ENSMUSG00000065416 | -1,42E+00 | -2,619474321 | 1,65E+00 | 1,99E-01 | 5,50E-01 | Mir19a    | 0,37 | No  |
| ENSMUSG00000065417 | -4,17E-02 | -2,963202678 | 7,92E-04 | 9,78E-01 | 1,00E+00 | Mir340    | 0,97 | No  |
| ENSMUSG00000065420 | -7,36E-01 | 2,20463804   | 2,72E+01 | 1,84E-07 | 9,69E-06 | Mir142b   | 0,60 | Yes |
| ENSMUSG00000065429 | 2,25E+00  | -2,929330971 | 1,96E+00 | 1,62E-01 | 5,11E-01 | Mir345    | 4,77 | No  |
| ENSMUSG00000065430 | 1,25E+00  | -2,740858078 | 9,66E-01 | 3,26E-01 | 6,26E-01 | Mir26a-2  | 2,38 | No  |
| ENSMUSG00000065431 | -1,89E-01 | -1,015459572 | 1,83E-01 | 6,69E-01 | 8,87E-01 | Mir186    | 0,88 | No  |
| ENSMUSG00000065434 | 2,91E-01  | 0,635553179  | 1,58E+00 | 2,09E-01 | 5,50E-01 | Mir7-1    | 1,22 | No  |
| ENSMUSG00000065437 | 1,43E+00  | -3,058381022 | 8,72E-01 | 3,50E-01 | 6,52E-01 | Mir30d    | 2,69 | No  |
| ENSMUSG00000065439 | 1,20E+00  | -2,378376038 | 1,66E+00 | 1,98E-01 | 5,50E-01 | Mir140    | 2,29 | No  |
| ENSMUSG00000065440 | 1,81E+00  | -3,10765737  | 1,28E+00 | 2,58E-01 | 5,50E-01 | Mirlet7g  | 3,49 | No  |
| ENSMUSG00000065442 | -1,12E+00 | -2,429079041 | 1,52E+00 | 2,18E-01 | 5,50E-01 | Mir20a    | 0,46 | No  |
| ENSMUSG00000065444 | 1,11E+00  | -0,588503617 | 8,83E+00 | 2,97E-03 | 3,81E-02 | Mir27a    | 2,16 | Yes |
| ENSMUSG00000065445 | 1,87E+00  | -3,107639691 | 1,38E+00 | 2,40E-01 | 5,50E-01 | Mir143    | 3,67 | No  |
| ENSMUSG00000065447 | -5,23E-01 | -2,94075836  | 1,38E-01 | 7,10E-01 | 9,09E-01 | Mir302d   | 0,70 | No  |
| ENSMUSG00000065449 | 1,85E+00  | -3,107657832 | 1,35E+00 | 2,46E-01 | 5,50E-01 | Mir365-1  | 3,61 | No  |
| ENSMUSG00000065451 | 3,82E-01  | -2,832040853 | 7,34E-02 | 7,86E-01 | 9,52E-01 | Mir101a   | 1,30 | No  |
| ENSMUSG00000065452 | -2,88E-01 | -2,015725494 | 1,44E-01 | 7,04E-01 | 9,06E-01 | Mir207    | 0,82 | No  |
| ENSMUSG00000065453 | 9,55E-01  | -2,333224214 | 1,13E+00 | 2,87E-01 | 5,83E-01 | Mirlet7d  | 1,94 | No  |
| ENSMUSG00000065455 | 3,32E-02  | -1,522718864 | 4,01E-03 | 9,50E-01 | 1,00E+00 | Mir21a    | 1,02 | No  |
| ENSMUSG00000065458 | 1,44E+00  | -2,907340105 | 1,22E+00 | 2,68E-01 | 5,65E-01 | Mir181b-1 | 2,72 | No  |
| ENSMUSG00000065463 | 2,68E-01  | -1,355719613 | 2,45E-01 | 6,20E-01 | 8,57E-01 | Snord45c  | 1,20 | No  |
| ENSMUSG00000065464 | -1,87E+00 | -3,107637761 | 1,39E+00 | 2,38E-01 | 5,50E-01 | Mir185    | 0,27 | No  |
| ENSMUSG00000065468 | -3,61E-01 | -2,226330568 | 1,64E-01 | 6,85E-01 | 8,97E-01 | Mir26b    | 0,78 | No  |
| ENSMUSG00000065470 | 1,81E+00  | -3,10765737  | 1,28E+00 | 2,58E-01 | 5,50E-01 | Mir149    | 3,49 | No  |
| ENSMUSG00000065475 | 8,69E-01  | -1,216142242 | 2,80E+00 | 9,40E-02 | 3,84E-01 | Mir27b    | 1,83 | No  |
| ENSMUSG00000065479 | 1,21E+00  | -3,07015885  | 6,74E-01 | 4,12E-01 | 7,07E-01 | Mir125a   | 2,31 | No  |
| ENSMUSG00000065482 | -1,24E+00 | -2,963267303 | 7,18E-01 | 3,97E-01 | 6,97E-01 | Mir302c   | 0,42 | No  |
| ENSMUSG00000065483 | 2,61E+00  | -3,033672762 | 2,63E+00 | 1,05E-01 | 3,97E-01 | Mir181c   | 6,10 | No  |
| ENSMUSG00000065489 | 4,79E-01  | -2,226324542 | 3,11E-01 | 5,77E-01 | 8,35E-01 | Mir365-2  | 1,39 | No  |
| ENSMUSG00000065490 | 7,63E-01  | -2,896152067 | 3,18E-01 | 5,73E-01 | 8,32E-01 | Mir30c-1  | 1,70 | No  |
| ENSMUSG00000065493 | 5,93E-01  | -2,800991485 | 1,41E-01 | 7,07E-01 | 9,08E-01 | Mir34a    | 1,51 | No  |
| ENSMUSG00000065495 | -1,10E+00 | -2,497578824 | 1,10E+00 | 2,94E-01 | 5,89E-01 | Mir150    | 0,47 | No  |

|                    |           |              |           |          |          |           |       |    |
|--------------------|-----------|--------------|-----------|----------|----------|-----------|-------|----|
| ENSMUSG00000065501 | 9,01E-03  | -3,107646452 | -5,16E-10 | 1,00E+00 | 1,00E+00 | Mir335    | 1,01  | No |
| ENSMUSG00000065502 | -2,19E-01 | -2,750907144 | 3,97E-02  | 8,42E-01 | 9,85E-01 | Mir202    | 0,86  | No |
| ENSMUSG00000065508 | -9,04E-01 | -2,614584237 | 7,10E-01  | 4,00E-01 | 6,98E-01 | Mir17     | 0,53  | No |
| ENSMUSG00000065512 | -1,23E+00 | -3,146117124 | 7,12E-01  | 3,99E-01 | 6,98E-01 | Mir138-2  | 0,42  | No |
| ENSMUSG00000065513 | -5,62E-01 | -2,548245651 | 2,48E-01  | 6,19E-01 | 8,56E-01 | Mir26a-1  | 0,68  | No |
| ENSMUSG00000065514 | 8,65E-01  | -2,673603807 | 5,38E-01  | 4,63E-01 | 7,52E-01 | Mir106b   | 1,82  | No |
| ENSMUSG00000065518 | -4,90E-01 | -2,998036706 | 1,20E-01  | 7,29E-01 | 9,20E-01 | Mir423    | 0,71  | No |
| ENSMUSG00000065519 | 8,07E-01  | -2,60071452  | 5,67E-01  | 4,52E-01 | 7,41E-01 | Mir10a    | 1,75  | No |
| ENSMUSG00000065520 | -2,70E+00 | -2,896126596 | 2,88E+00  | 8,95E-02 | 3,79E-01 | Mir128-1  | 0,15  | No |
| ENSMUSG00000065521 | -2,63E-02 | -3,033641358 | 2,33E-04  | 9,88E-01 | 1,00E+00 | Mir296    | 0,98  | No |
| ENSMUSG00000065523 | -1,06E-01 | -3,033634182 | 5,86E-03  | 9,39E-01 | 1,00E+00 | Mir192    | 0,93  | No |
| ENSMUSG00000065527 | 2,14E-01  | -2,481311834 | 4,96E-02  | 8,24E-01 | 9,73E-01 | Mir93     | 1,16  | No |
| ENSMUSG00000065529 | -2,36E-01 | 0,432347385  | 8,31E-01  | 3,62E-01 | 6,64E-01 | Mir22     | 0,85  | No |
| ENSMUSG00000065532 | 9,01E-03  | -3,107646452 | -5,16E-10 | 1,00E+00 | 1,00E+00 | Mir187    | 1,01  | No |
| ENSMUSG00000065534 | 2,97E-01  | -2,601223874 | 7,76E-02  | 7,81E-01 | 9,49E-01 | Mir324    | 1,23  | No |
| ENSMUSG00000065537 | -2,10E-01 | -2,424811305 | 5,30E-02  | 8,18E-01 | 9,70E-01 | Mir132    | 0,86  | No |
| ENSMUSG00000065541 | 4,49E-01  | -0,384920592 | 1,84E+00  | 1,75E-01 | 5,33E-01 | Mir24-2   | 1,36  | No |
| ENSMUSG00000065543 | -4,81E-02 | -2,998010904 | 1,04E-03  | 9,74E-01 | 1,00E+00 | Mir330    | 0,97  | No |
| ENSMUSG00000065544 | -2,71E+00 | -2,963235336 | 2,92E+00  | 8,75E-02 | 3,78E-01 | Mir32     | 0,15  | No |
| ENSMUSG00000065547 | -1,35E-01 | -0,879702383 | 1,08E-01  | 7,43E-01 | 9,28E-01 | Mir199a-1 | 0,91  | No |
| ENSMUSG00000065548 | -1,39E+00 | -2,812053682 | 1,20E+00  | 2,73E-01 | 5,69E-01 | Mir29c    | 0,38  | No |
| ENSMUSG00000065551 | 2,64E+00  | -3,033673223 | 2,69E+00  | 1,01E-01 | 3,92E-01 | Mir210    | 6,23  | No |
| ENSMUSG00000065552 | -1,16E+00 | -2,929324749 | 5,83E-01  | 4,45E-01 | 7,36E-01 | Mir302a   | 0,45  | No |
| ENSMUSG00000065553 | 1,81E+00  | -3,10765737  | 1,28E+00  | 2,58E-01 | 5,50E-01 | Mir103-1  | 3,49  | No |
| ENSMUSG00000065555 | -1,68E+00 | -3,120604875 | 1,15E+00  | 2,83E-01 | 5,79E-01 | Mir219a-1 | 0,31  | No |
| ENSMUSG00000065562 | 6,51E-01  | -2,740869876 | 3,51E-01  | 5,54E-01 | 8,19E-01 | Mir215    | 1,57  | No |
| ENSMUSG00000065563 | -6,64E-02 | -2,600678392 | 5,05E-03  | 9,43E-01 | 1,00E+00 | Mir103-2  | 0,96  | No |
| ENSMUSG00000065564 | 2,36E-01  | -2,548233162 | 7,01E-02  | 7,91E-01 | 9,55E-01 | Mirlet7b  | 1,18  | No |
| ENSMUSG00000065565 | -9,11E-01 | -3,159433134 | 4,59E-01  | 4,98E-01 | 7,83E-01 | Mir181a-1 | 0,53  | No |
| ENSMUSG00000065571 | -8,86E-02 | -2,963249454 | 3,57E-03  | 9,52E-01 | 1,00E+00 | Mir326    | 0,94  | No |
| ENSMUSG00000065572 | 3,53E+00  | -2,711725021 | 5,41E+00  | 2,01E-02 | 1,51E-01 | Mir130b   | 11,54 | No |
| ENSMUSG00000065573 | 3,12E+00  | -2,8961712   | 3,97E+00  | 4,64E-02 | 2,57E-01 | Mir350    | 8,68  | No |

|                    |           |              |           |          |          |            |      |     |
|--------------------|-----------|--------------|-----------|----------|----------|------------|------|-----|
| ENSMUSG00000065578 | -1,22E+00 | -3,146113954 | 6,96E-01  | 4,04E-01 | 7,01E-01 | Mir181b-2  | 0,43 | No  |
| ENSMUSG00000065579 | 3,29E-01  | -1,079614688 | 5,80E-01  | 4,46E-01 | 7,37E-01 | Mir425     | 1,26 | No  |
| ENSMUSG00000065580 | 9,01E-03  | -3,107646452 | -5,16E-10 | 1,00E+00 | 1,00E+00 | Mir15b     | 1,01 | No  |
| ENSMUSG00000065581 | -1,74E-01 | -2,205804177 | 5,06E-02  | 8,22E-01 | 9,72E-01 | Mir194-1   | 0,89 | No  |
| ENSMUSG00000065582 | 7,43E-01  | -2,963261206 | 3,01E-01  | 5,83E-01 | 8,38E-01 | Mir194-2   | 1,67 | No  |
| ENSMUSG00000065586 | 5,97E-03  | -3,1461183   | -3,40E-10 | 1,00E+00 | 1,00E+00 | Mir96      | 1,00 | No  |
| ENSMUSG00000065589 | -1,03E-01 | -2,831985655 | 7,40E-03  | 9,31E-01 | 1,00E+00 | Mir301     | 0,93 | No  |
| ENSMUSG00000065590 | -7,95E-01 | -2,015640706 | 1,10E+00  | 2,93E-01 | 5,89E-01 | Mir212     | 0,58 | No  |
| ENSMUSG00000065591 | 2,64E-02  | -0,669227731 | 4,72E-03  | 9,45E-01 | 1,00E+00 | Gm22753    | 1,02 | No  |
| ENSMUSG00000065593 | 5,83E-01  | -2,107653441 | 7,73E-01  | 3,79E-01 | 6,80E-01 | Mir339     | 1,50 | No  |
| ENSMUSG00000065594 | -1,89E+00 | -3,1076441   | 1,42E+00  | 2,33E-01 | 5,50E-01 | Mir107     | 0,27 | No  |
| ENSMUSG00000065599 | 5,64E-01  | -0,793523432 | 1,94E+00  | 1,64E-01 | 5,15E-01 | Mir23b     | 1,48 | No  |
| ENSMUSG00000065600 | 6,16E-01  | -3,03366067  | 1,51E-01  | 6,97E-01 | 9,03E-01 | Mir338     | 1,53 | No  |
| ENSMUSG00000065601 | 1,84E+00  | -3,033649193 | 1,33E+00  | 2,49E-01 | 5,50E-01 | Mir146     | 3,58 | No  |
| ENSMUSG00000065604 | 2,06E-02  | -3,146103739 | -9,26E-10 | 1,00E+00 | 1,00E+00 | Mir29b-1   | 1,01 | No  |
| ENSMUSG00000065607 | 1,18E+00  | -3,107651911 | 6,57E-01  | 4,17E-01 | 7,12E-01 | Mir331     | 2,27 | No  |
| ENSMUSG00000065608 | 2,64E+00  | -3,033673223 | 2,69E+00  | 1,01E-01 | 3,92E-01 | Mirlet7c-2 | 6,23 | No  |
| ENSMUSG00000065610 | -4,08E-02 | -2,963255775 | 7,59E-04  | 9,78E-01 | 1,00E+00 | Mir29a     | 0,97 | No  |
| ENSMUSG00000065611 | 1,34E+00  | -0,7696194   | 1,05E+01  | 1,21E-03 | 1,89E-02 | Mir23a     | 2,54 | Yes |
| ENSMUSG00000065619 | 5,97E-03  | -3,1461183   | -3,40E-10 | 1,00E+00 | 1,00E+00 | Mir183     | 1,00 | No  |
| ENSMUSG00000065623 | -2,41E-01 | -1,92923942  | 1,15E-01  | 7,35E-01 | 9,24E-01 | Gm24762    | 0,85 | No  |
| ENSMUSG00000065627 | 7,53E-01  | -2,711659049 | 3,07E-01  | 5,79E-01 | 8,36E-01 | Gm24803    | 1,68 | No  |
| ENSMUSG00000065628 | -1,63E-01 | -1,571851145 | 8,22E-02  | 7,74E-01 | 9,45E-01 | Snord33    | 0,89 | No  |
| ENSMUSG00000065634 | 1,31E+00  | -1,929345509 | 3,05E+00  | 8,09E-02 | 3,65E-01 | Gm24252    | 2,48 | No  |
| ENSMUSG00000065637 | -2,96E-01 | 0,352105175  | 1,32E+00  | 2,51E-01 | 5,50E-01 | Gm26397    | 0,81 | No  |
| ENSMUSG00000065640 | -9,05E-02 | -1,912584167 | 1,71E-02  | 8,96E-01 | 1,00E+00 | Snord1c    | 0,94 | No  |
| ENSMUSG00000065643 | -1,75E+00 | -2,548171965 | 3,38E+00  | 6,58E-02 | 3,22E-01 | Gm25897    | 0,30 | No  |
| ENSMUSG00000065649 | 1,14E+00  | -2,760442601 | 7,89E-01  | 3,74E-01 | 6,75E-01 | Snora74a   | 2,20 | No  |
| ENSMUSG00000065651 | -7,39E-01 | -1,711612729 | 1,43E+00  | 2,32E-01 | 5,50E-01 | Gm25973    | 0,60 | No  |
| ENSMUSG00000065657 | 1,84E+00  | -3,033649193 | 1,33E+00  | 2,49E-01 | 5,50E-01 | Gm25337    | 3,58 | No  |
| ENSMUSG00000065658 | 9,01E-03  | -3,107646452 | -5,16E-10 | 1,00E+00 | 1,00E+00 | Gm23102    | 1,01 | No  |
| ENSMUSG00000065662 | -4,87E-02 | -2,896149255 | 1,54E-03  | 9,69E-01 | 1,00E+00 | n-R5s161   | 0,97 | No  |

|                    |           |              |           |          |          |          |       |    |
|--------------------|-----------|--------------|-----------|----------|----------|----------|-------|----|
| ENSMUSG00000065663 | -2,92E-01 | -0,235000795 | 8,87E-01  | 3,46E-01 | 6,47E-01 | Gm22579  | 0,82  | No |
| ENSMUSG00000065669 | -6,88E-01 | 0,22186807   | 6,25E+00  | 1,24E-02 | 1,10E-01 | Gm22581  | 0,62  | No |
| ENSMUSG00000065673 | -5,51E-02 | -2,832041634 | 2,04E-03  | 9,64E-01 | 1,00E+00 | Gm24258  | 0,96  | No |
| ENSMUSG00000065674 | -4,38E-01 | -2,655086267 | 1,96E-01  | 6,58E-01 | 8,81E-01 | Gm24259  | 0,74  | No |
| ENSMUSG00000065675 | 4,44E-01  | -2,770627496 | 1,54E-01  | 6,95E-01 | 9,02E-01 | Gm24260  | 1,36  | No |
| ENSMUSG00000065676 | -1,27E+00 | -1,755656655 | 4,19E+00  | 4,08E-02 | 2,39E-01 | Snord42b | 0,41  | No |
| ENSMUSG00000065678 | 3,50E+00  | -2,711742211 | 5,31E+00  | 2,12E-02 | 1,57E-01 | Gm24261  | 11,29 | No |
| ENSMUSG00000065680 | -1,57E+00 | -2,863674799 | 1,64E+00  | 2,00E-01 | 5,50E-01 | Snord38a | 0,34  | No |
| ENSMUSG00000065683 | -3,55E+00 | -2,83197716  | 5,67E+00  | 1,73E-02 | 1,37E-01 | Gm23731  | 0,09  | No |
| ENSMUSG00000065685 | -1,94E+00 | -3,107619243 | 1,50E+00  | 2,21E-01 | 5,50E-01 | Gm23732  | 0,26  | No |
| ENSMUSG00000065686 | -7,25E-02 | -0,831935731 | 2,76E-02  | 8,68E-01 | 1,00E+00 | Snora5c  | 0,95  | No |
| ENSMUSG00000065687 | 2,62E+00  | -3,033654625 | 2,66E+00  | 1,03E-01 | 3,95E-01 | Gm23734  | 6,16  | No |
| ENSMUSG00000065692 | -1,89E+00 | -3,1076441   | 1,42E+00  | 2,33E-01 | 5,50E-01 | Gm25410  | 0,27  | No |
| ENSMUSG00000065701 | 6,78E-01  | -2,832060811 | 2,51E-01  | 6,17E-01 | 8,55E-01 | Rny1     | 1,60  | No |
| ENSMUSG00000065715 | -2,76E-02 | -1,344338795 | 2,90E-03  | 9,57E-01 | 1,00E+00 | Snord7   | 0,98  | No |
| ENSMUSG00000065725 | 3,86E-01  | -0,541941829 | 1,16E+00  | 2,82E-01 | 5,78E-01 | Gm26165  | 1,31  | No |
| ENSMUSG00000065728 | 6,22E-02  | -1,740734279 | 1,04E-02  | 9,19E-01 | 1,00E+00 | Gm26175  | 1,04  | No |
| ENSMUSG00000065732 | -1,87E+00 | -3,03364178  | 1,41E+00  | 2,36E-01 | 5,50E-01 | Gm24492  | 0,27  | No |
| ENSMUSG00000065734 | -7,32E-02 | 0,195379646  | 7,31E-02  | 7,87E-01 | 9,53E-01 | Snord49a | 0,95  | No |
| ENSMUSG00000065735 | 8,31E-02  | -1,183727399 | 3,22E-02  | 8,58E-01 | 9,94E-01 | Snord80  | 1,06  | No |
| ENSMUSG00000065738 | -3,59E-01 | 0,439036965  | 1,83E+00  | 1,76E-01 | 5,35E-01 | Gm24494  | 0,78  | No |
| ENSMUSG00000065743 | 3,14E-02  | -3,107617333 | -7,69E-10 | 1,00E+00 | 1,00E+00 | Gm25008  | 1,02  | No |
| ENSMUSG00000065750 | 1,23E+00  | -2,832024669 | 9,31E-01  | 3,35E-01 | 6,35E-01 | Gm23346  | 2,34  | No |
| ENSMUSG00000065752 | 3,17E-01  | -1,095090673 | 4,53E-01  | 5,01E-01 | 7,86E-01 | Gm23344  | 1,25  | No |
| ENSMUSG00000065765 | 6,58E-01  | -1,879985217 | 1,15E+00  | 2,84E-01 | 5,80E-01 | Gm23851  | 1,58  | No |
| ENSMUSG00000065767 | -2,30E-01 | -2,600693934 | 5,76E-02  | 8,10E-01 | 9,66E-01 | Gm23849  | 0,85  | No |
| ENSMUSG00000065771 | 1,82E+00  | -3,033661385 | 1,31E+00  | 2,52E-01 | 5,50E-01 | n-R5s54  | 3,54  | No |
| ENSMUSG00000065773 | 1,81E+00  | -3,10765737  | 1,28E+00  | 2,58E-01 | 5,50E-01 | Rnu1b6   | 3,49  | No |
| ENSMUSG00000065778 | -1,03E+00 | -1,697185198 | 3,43E+00  | 6,41E-02 | 3,17E-01 | Gm22154  | 0,49  | No |
| ENSMUSG00000065782 | -4,22E-01 | -0,403240587 | 1,39E+00  | 2,38E-01 | 5,50E-01 | Gm22680  | 0,75  | No |
| ENSMUSG00000065788 | -2,71E+00 | -2,896102977 | 2,90E+00  | 8,85E-02 | 3,79E-01 | Gm22682  | 0,15  | No |
| ENSMUSG00000065789 | 2,82E-01  | -2,378362191 | 1,23E-01  | 7,26E-01 | 9,19E-01 | Gm25869  | 1,22  | No |

|                    |           |              |           |          |          |          |      |    |
|--------------------|-----------|--------------|-----------|----------|----------|----------|------|----|
| ENSMUSG00000065798 | -1,19E-01 | -2,770637672 | 9,55E-03  | 9,22E-01 | 1,00E+00 | Gm25518  | 0,92 | No |
| ENSMUSG00000065799 | -1,89E+00 | -3,1076441   | 1,42E+00  | 2,33E-01 | 5,50E-01 | Gm25517  | 0,27 | No |
| ENSMUSG00000065800 | 1,82E+00  | -3,033661385 | 1,31E+00  | 2,52E-01 | 5,50E-01 | Gm23042  | 3,54 | No |
| ENSMUSG00000065808 | -6,19E-01 | -1,165644343 | 1,94E+00  | 1,63E-01 | 5,14E-01 | Gm23037  | 0,65 | No |
| ENSMUSG00000065817 | -6,48E-01 | -2,600633321 | 4,00E-01  | 5,27E-01 | 8,04E-01 | Gm24698  | 0,64 | No |
| ENSMUSG00000065818 | 3,10E-01  | -1,136472695 | 4,56E-01  | 5,00E-01 | 7,85E-01 | Snord35a | 1,24 | No |
| ENSMUSG00000065819 | 4,47E-01  | -2,711702252 | 1,56E-01  | 6,93E-01 | 9,01E-01 | Gm24693  | 1,36 | No |
| ENSMUSG00000065820 | -5,83E-01 | -2,770564587 | 2,67E-01  | 6,05E-01 | 8,49E-01 | Gm26316  | 0,67 | No |
| ENSMUSG00000065822 | -2,98E-01 | -1,785715074 | 2,59E-01  | 6,11E-01 | 8,52E-01 | Snord15a | 0,81 | No |
| ENSMUSG00000065824 | -6,65E-02 | -1,289541112 | 1,76E-02  | 8,95E-01 | 1,00E+00 | Gm26315  | 0,95 | No |
| ENSMUSG00000065836 | 2,62E+00  | -2,963293967 | 2,65E+00  | 1,04E-01 | 3,95E-01 | Gm23502  | 6,13 | No |
| ENSMUSG00000065851 | -4,01E-02 | -2,548210308 | 1,49E-03  | 9,69E-01 | 1,00E+00 | Gm22352  | 0,97 | No |
| ENSMUSG00000065852 | -2,65E+00 | -3,033633091 | 2,78E+00  | 9,55E-02 | 3,86E-01 | Gm22353  | 0,16 | No |
| ENSMUSG00000065853 | 9,01E-03  | -3,107646452 | -5,16E-10 | 1,00E+00 | 1,00E+00 | Gm22354  | 1,01 | No |
| ENSMUSG00000065862 | 5,39E-02  | 1,788210684  | 1,13E-01  | 7,37E-01 | 9,25E-01 | Gm24029  | 1,04 | No |
| ENSMUSG00000065864 | -3,17E+00 | -2,896142751 | 4,24E+00  | 3,94E-02 | 2,35E-01 | Gm24031  | 0,11 | No |
| ENSMUSG00000065870 | -4,28E-02 | -2,740848597 | 1,26E-03  | 9,72E-01 | 1,00E+00 | Rnu3a    | 0,97 | No |
| ENSMUSG00000065873 | -7,95E-02 | -1,863748942 | 1,93E-02  | 8,90E-01 | 1,00E+00 | n-R5s183 | 0,95 | No |
| ENSMUSG00000065874 | -2,68E+00 | -2,963200749 | 2,85E+00  | 9,14E-02 | 3,82E-01 | Gm25683  | 0,16 | No |
| ENSMUSG00000065878 | 1,59E-01  | -1,128308819 | 1,14E-01  | 7,36E-01 | 9,24E-01 | Snord34  | 1,12 | No |
| ENSMUSG00000065883 | 2,33E-01  | -1,770652625 | 1,25E-01  | 7,23E-01 | 9,17E-01 | Gm22865  | 1,18 | No |
| ENSMUSG00000065887 | -1,30E-02 | -0,241720182 | 1,43E-03  | 9,70E-01 | 1,00E+00 | n-R5s185 | 0,99 | No |
| ENSMUSG00000065899 | 2,48E-01  | -0,627704851 | 4,33E-01  | 5,11E-01 | 7,94E-01 | Gm24523  | 1,19 | No |
| ENSMUSG00000065904 | -2,91E-01 | -0,963211801 | 4,06E-01  | 5,24E-01 | 8,01E-01 | Gm26109  | 0,82 | No |
| ENSMUSG00000065905 | 4,24E-02  | -3,033592245 | -1,17E-09 | 1,00E+00 | 1,00E+00 | Gm26110  | 1,03 | No |
| ENSMUSG00000065911 | -9,46E-01 | -1,448671775 | 3,10E+00  | 7,83E-02 | 3,57E-01 | Gm24447  | 0,52 | No |
| ENSMUSG00000065913 | 1,34E+00  | -2,497645752 | 1,83E+00  | 1,76E-01 | 5,34E-01 | Gm24448  | 2,53 | No |
| ENSMUSG00000065919 | -8,57E-01 | -2,963247565 | 4,04E-01  | 5,25E-01 | 8,02E-01 | Gm24449  | 0,55 | No |
| ENSMUSG00000065926 | 5,95E-01  | -2,448643382 | 3,95E-01  | 5,30E-01 | 8,05E-01 | Gm22798  | 1,51 | No |
| ENSMUSG00000065934 | -1,93E+00 | -2,963244023 | 1,47E+00  | 2,25E-01 | 5,50E-01 | Gm25630  | 0,26 | No |
| ENSMUSG00000065936 | -1,67E-02 | -2,963250293 | 1,29E-04  | 9,91E-01 | 1,00E+00 | Gm25628  | 0,99 | No |
| ENSMUSG00000065939 | -9,60E-01 | -0,816211653 | 4,79E+00  | 2,85E-02 | 1,92E-01 | Snora2b  | 0,51 | No |

|                    |           |              |          |          |          |               |       |     |
|--------------------|-----------|--------------|----------|----------|----------|---------------|-------|-----|
| ENSMUSG00000065944 | -3,02E-01 | -2,268053088 | 1,36E-01 | 7,12E-01 | 9,11E-01 | Rnu2-10       | 0,81  | No  |
| ENSMUSG00000065952 | -2,26E-01 | 5,491662926  | 1,07E+01 | 1,08E-03 | 1,72E-02 | C330021F23Rik | 0,86  | Yes |
| ENSMUSG00000065954 | 9,90E-02  | 7,73273441   | 2,84E+00 | 9,18E-02 | 3,82E-01 | Tacc1         | 1,07  | No  |
| ENSMUSG00000065968 | -7,38E-02 | -3,033659033 | 2,66E-03 | 9,59E-01 | 1,00E+00 | lfitm7        | 0,95  | No  |
| ENSMUSG00000065979 | 3,62E-02  | 5,580606068  | 2,79E-01 | 5,97E-01 | 8,45E-01 | Cpped1        | 1,03  | No  |
| ENSMUSG00000065987 | 5,75E-01  | -1,832018657 | 7,52E-01 | 3,86E-01 | 6,87E-01 | Cd209b        | 1,49  | No  |
| ENSMUSG00000065990 | -2,70E-02 | 5,730929421  | 1,61E-01 | 6,88E-01 | 8,98E-01 | Aurkaip1      | 0,98  | No  |
| ENSMUSG00000065999 | -8,59E-01 | -0,980369139 | 4,38E+00 | 3,65E-02 | 2,27E-01 | Zfp985        | 0,55  | No  |
| ENSMUSG00000066000 | 3,23E-01  | 1,269699989  | 2,98E+00 | 8,43E-02 | 3,72E-01 | Zfp979        | 1,25  | No  |
| ENSMUSG00000066007 | 3,39E-01  | -2,355620086 | 1,64E-01 | 6,85E-01 | 8,97E-01 | Zfp600        | 1,26  | No  |
| ENSMUSG00000066009 | -3,76E-01 | -0,57416539  | 1,11E+00 | 2,91E-01 | 5,87E-01 | Zfp987        | 0,77  | No  |
| ENSMUSG00000066026 | 1,97E-01  | 5,67731001   | 8,44E+00 | 3,66E-03 | 4,44E-02 | Dhrs3         | 1,15  | Yes |
| ENSMUSG00000066027 | 1,87E+00  | -3,107639691 | 1,38E+00 | 2,40E-01 | 5,50E-01 | Gm10436       | 3,67  | No  |
| ENSMUSG00000066036 | -3,13E-02 | 8,210621907  | 2,92E-01 | 5,89E-01 | 8,41E-01 | Ubr4          | 0,98  | No  |
| ENSMUSG00000066037 | -9,81E-02 | 5,88126472   | 2,19E+00 | 1,38E-01 | 4,70E-01 | Hnrnpr        | 0,93  | No  |
| ENSMUSG00000066042 | 1,38E-01  | 1,604474847  | 6,24E-01 | 4,29E-01 | 7,23E-01 | Med18         | 1,10  | No  |
| ENSMUSG00000066043 | 1,02E-01  | 5,525017338  | 2,18E+00 | 1,40E-01 | 4,73E-01 | Phactr4       | 1,07  | No  |
| ENSMUSG00000066057 | 2,09E-01  | 1,462748546  | 1,45E+00 | 2,29E-01 | 5,50E-01 | Gm1976        | 1,16  | No  |
| ENSMUSG00000066058 | -1,94E+00 | -3,107619243 | 1,50E+00 | 2,21E-01 | 5,50E-01 | Cldn19        | 0,26  | No  |
| ENSMUSG00000066060 | 1,61E+00  | -1,627729446 | 6,19E+00 | 1,29E-02 | 1,12E-01 | Gm12866       | 3,06  | No  |
| ENSMUSG00000066068 | -1,59E-01 | 5,692332982  | 5,55E+00 | 1,85E-02 | 1,44E-01 | Gm13611       | 0,90  | No  |
| ENSMUSG00000066071 | 4,50E-01  | 2,399188382  | 9,61E+00 | 1,93E-03 | 2,72E-02 | Cyp4a12a      | 1,37  | Yes |
| ENSMUSG00000066072 | -6,39E-02 | -2,831998678 | 2,77E-03 | 9,58E-01 | 1,00E+00 | Cyp4a10       | 0,96  | No  |
| ENSMUSG00000066107 | -1,13E-02 | 0,4059689    | 2,09E-03 | 9,64E-01 | 1,00E+00 | Gm12666       | 0,99  | No  |
| ENSMUSG00000066108 | 4,46E+00  | -2,268168792 | 1,07E+01 | 1,05E-03 | 1,68E-02 | Muc5b         | 21,94 | Yes |
| ENSMUSG00000066113 | -1,89E+00 | -3,1076441   | 1,42E+00 | 2,33E-01 | 5,50E-01 | Adamts1       | 0,27  | No  |
| ENSMUSG00000066116 | -2,76E-01 | 6,395450617  | 1,91E+01 | 1,24E-05 | 4,07E-04 | Gm10154       | 0,83  | Yes |
| ENSMUSG00000066129 | -1,01E+00 | -0,895974874 | 6,24E+00 | 1,25E-02 | 1,10E-01 | Kndc1         | 0,50  | No  |
| ENSMUSG00000066141 | -1,92E+00 | -3,0336536   | 1,46E+00 | 2,27E-01 | 5,50E-01 | Gm11232       | 0,26  | No  |
| ENSMUSG00000066148 | 3,33E-02  | 4,400204488  | 1,67E-01 | 6,83E-01 | 8,95E-01 | Prpf4         | 1,02  | No  |
| ENSMUSG00000066149 | 4,47E-02  | 3,880681163  | 2,44E-01 | 6,21E-01 | 8,57E-01 | Cdc26         | 1,03  | No  |
| ENSMUSG00000066150 | 2,02E-01  | 6,375061937  | 1,01E+01 | 1,50E-03 | 2,23E-02 | Slc31a1       | 1,15  | Yes |

|                    |           |              |           |          |          |               |      |     |
|--------------------|-----------|--------------|-----------|----------|----------|---------------|------|-----|
| ENSMUSG00000066151 | 8,88E-02  | 6,847720153  | 2,10E+00  | 1,47E-01 | 4,86E-01 | Fkbp15        | 1,06 | No  |
| ENSMUSG00000066152 | 2,39E-01  | 5,980580959  | 1,33E+01  | 2,62E-04 | 5,45E-03 | Slc31a2       | 1,18 | Yes |
| ENSMUSG00000066170 | 6,03E-01  | -2,070265394 | 7,36E-01  | 3,91E-01 | 6,91E-01 | E230001N04Rik | 1,52 | No  |
| ENSMUSG00000066175 | -3,27E-01 | -0,200604175 | 1,04E+00  | 3,07E-01 | 6,05E-01 | 2510046G10Rik | 0,80 | No  |
| ENSMUSG00000066176 | -1,44E+00 | -2,424798597 | 2,51E+00  | 1,13E-01 | 4,15E-01 | Gm12511       | 0,37 | No  |
| ENSMUSG00000066178 | -1,45E+00 | -2,99801717  | 9,78E-01  | 3,23E-01 | 6,23E-01 | 6030445D17Rik | 0,37 | No  |
| ENSMUSG00000066180 | -3,25E-01 | 4,453496618  | 1,60E+01  | 6,41E-05 | 1,68E-03 | Gm10155       | 0,80 | Yes |
| ENSMUSG00000066189 | -3,83E-02 | -3,107651936 | -7,91E-11 | 1,00E+00 | 1,00E+00 | Cacng3        | 0,97 | No  |
| ENSMUSG00000066191 | 2,34E-02  | 0,295679046  | 7,99E-03  | 9,29E-01 | 1,00E+00 | Anks6         | 1,02 | No  |
| ENSMUSG00000066196 | -4,41E-01 | -2,401306736 | 1,99E-01  | 6,55E-01 | 8,79E-01 | Spag8         | 0,74 | No  |
| ENSMUSG00000066224 | 9,01E-03  | -3,107646452 | -5,16E-10 | 1,00E+00 | 1,00E+00 | Arid3c        | 1,01 | No  |
| ENSMUSG00000066232 | 9,69E-02  | 6,70667224   | 2,47E+00  | 1,16E-01 | 4,22E-01 | Ipo7          | 1,07 | No  |
| ENSMUSG00000066233 | -1,77E-02 | 1,83449165   | 1,20E-02  | 9,13E-01 | 1,00E+00 | Tmem42        | 0,99 | No  |
| ENSMUSG00000066235 | -1,13E-01 | 0,952688468  | 2,96E-01  | 5,86E-01 | 8,39E-01 | Pomgnt2       | 0,92 | No  |
| ENSMUSG00000066245 | 9,67E-03  | 5,325041871  | 1,86E-02  | 8,91E-01 | 1,00E+00 | Gm10156       | 1,01 | No  |
| ENSMUSG00000066258 | -6,90E-02 | 4,72795607   | 8,09E-01  | 3,69E-01 | 6,70E-01 | Trim12a       | 0,95 | No  |
| ENSMUSG00000066262 | 1,85E+00  | -3,107657832 | 1,35E+00  | 2,46E-01 | 5,50E-01 | Olfr640       | 3,61 | No  |
| ENSMUSG00000066263 | -2,70E+00 | -3,033614577 | 2,89E+00  | 8,93E-02 | 3,79E-01 | Olfr639       | 0,15 | No  |
| ENSMUSG00000066269 | -1,89E+00 | -3,1076441   | 1,42E+00  | 2,33E-01 | 5,50E-01 | Olfr575       | 0,27 | No  |
| ENSMUSG00000066270 | -1,42E-01 | 5,307116505  | 4,00E+00  | 4,56E-02 | 2,55E-01 | Gm10157       | 0,91 | No  |
| ENSMUSG00000066278 | 3,17E-02  | 4,594057073  | 1,59E-01  | 6,90E-01 | 8,99E-01 | Vps37b        | 1,02 | No  |
| ENSMUSG00000066279 | 3,80E-02  | -3,070130373 | -9,83E-10 | 1,00E+00 | 1,00E+00 | Chrna10       | 1,03 | No  |
| ENSMUSG00000066306 | -2,80E-02 | 7,730021244  | 2,28E-01  | 6,33E-01 | 8,65E-01 | Numa1         | 0,98 | No  |
| ENSMUSG00000066315 | -1,07E-01 | 8,418464037  | 3,46E+00  | 6,29E-02 | 3,13E-01 | Gm12918       | 0,93 | No  |
| ENSMUSG00000066324 | 3,13E-02  | 6,267239521  | 2,40E-01  | 6,24E-01 | 8,59E-01 | Impad1        | 1,02 | No  |
| ENSMUSG00000066357 | -2,18E-01 | 5,400066917  | 9,87E+00  | 1,68E-03 | 2,43E-02 | Wdr6          | 0,86 | Yes |
| ENSMUSG00000066361 | -3,21E+00 | -2,896117057 | 4,33E+00  | 3,75E-02 | 2,30E-01 | Serpina3c     | 0,11 | No  |
| ENSMUSG00000066362 | -1,67E-01 | 6,759318934  | 7,37E+00  | 6,64E-03 | 6,91E-02 | Rps13-ps1     | 0,89 | No  |
| ENSMUSG00000066363 | -1,53E+00 | -1,574183702 | 7,02E+00  | 8,07E-03 | 7,95E-02 | Serpina3f     | 0,35 | No  |
| ENSMUSG00000066364 | -3,16E+00 | -2,963246013 | 4,20E+00  | 4,04E-02 | 2,38E-01 | Serpina3b     | 0,11 | No  |
| ENSMUSG00000066378 | 1,29E-01  | -2,185672321 | 2,89E-02  | 8,65E-01 | 9,98E-01 | Gm10160       | 1,09 | No  |
| ENSMUSG00000066382 | -1,89E+00 | -3,1076441   | 1,42E+00  | 2,33E-01 | 5,50E-01 | lqcf5         | 0,27 | No  |

|                    |           |              |           |          |          |               |      |     |
|--------------------|-----------|--------------|-----------|----------|----------|---------------|------|-----|
| ENSMUSG00000066389 | -2,74E-01 | -0,205733382 | 7,65E-01  | 3,82E-01 | 6,83E-01 | Rpl31-ps1     | 0,83 | No  |
| ENSMUSG00000066392 | -1,94E+00 | -3,107619243 | 1,50E+00  | 2,21E-01 | 5,50E-01 | Nrxn3         | 0,26 | No  |
| ENSMUSG00000066406 | -1,16E-01 | 8,786914957  | 4,11E+00  | 4,26E-02 | 2,45E-01 | Akap13        | 0,92 | No  |
| ENSMUSG00000066407 | -2,37E-01 | 6,369925071  | 1,40E+01  | 1,82E-04 | 4,02E-03 | Gm10263       | 0,85 | Yes |
| ENSMUSG00000066415 | 1,52E-01  | 5,996313094  | 5,39E+00  | 2,03E-02 | 1,53E-01 | Msl2          | 1,11 | No  |
| ENSMUSG00000066438 | 9,01E-03  | -3,107646452 | -5,16E-10 | 1,00E+00 | 1,00E+00 | Plekhd1       | 1,01 | No  |
| ENSMUSG00000066440 | 8,31E-02  | 6,680917675  | 1,80E+00  | 1,79E-01 | 5,40E-01 | Zfyve26       | 1,06 | No  |
| ENSMUSG00000066441 | 7,05E-02  | 5,283515492  | 9,75E-01  | 3,23E-01 | 6,24E-01 | Rdh11         | 1,05 | No  |
| ENSMUSG00000066442 | -2,24E-01 | 3,985292283  | 6,40E+00  | 1,14E-02 | 1,03E-01 | Mthfs         | 0,86 | No  |
| ENSMUSG00000066443 | -2,27E-01 | 6,052655469  | 1,22E+01  | 4,83E-04 | 8,92E-03 | Gm10163       | 0,85 | Yes |
| ENSMUSG00000066456 | -1,07E+00 | 3,250500871  | 1,04E+02  | 1,97E-24 | 6,65E-22 | Hmgn3         | 0,48 | Yes |
| ENSMUSG00000066475 | -2,90E-01 | 2,032790735  | 3,92E+00  | 4,77E-02 | 2,62E-01 | Gm10268       | 0,82 | No  |
| ENSMUSG00000066477 | -1,94E+00 | -3,107619243 | 1,50E+00  | 2,21E-01 | 5,50E-01 | Gm16551       | 0,26 | No  |
| ENSMUSG00000066478 | 1,79E+00  | -3,033666867 | 1,28E+00  | 2,58E-01 | 5,50E-01 | Gm5745        | 3,46 | No  |
| ENSMUSG00000066487 | 3,77E-02  | 5,748185959  | 3,17E-01  | 5,74E-01 | 8,33E-01 | Gm5786        | 1,03 | No  |
| ENSMUSG00000066491 | -8,58E-02 | 5,985249392  | 1,71E+00  | 1,91E-01 | 5,50E-01 | Gm6265        | 0,94 | No  |
| ENSMUSG00000066510 | 2,26E-01  | -0,800799738 | 2,38E-01  | 6,26E-01 | 8,60E-01 | Ankdd1a       | 1,17 | No  |
| ENSMUSG00000066513 | -6,79E-02 | -2,548268043 | 4,19E-03  | 9,48E-01 | 1,00E+00 | Klk1b4        | 0,95 | No  |
| ENSMUSG00000066515 | 7,31E-01  | -2,963279337 | 2,91E-01  | 5,90E-01 | 8,41E-01 | Klk1b3        | 1,66 | No  |
| ENSMUSG00000066516 | 9,08E-02  | -1,929238831 | 1,92E-02  | 8,90E-01 | 1,00E+00 | Klk1b21       | 1,06 | No  |
| ENSMUSG00000066537 | 9,94E-01  | -2,80099769  | 5,76E-01  | 4,48E-01 | 7,38E-01 | Vmn2r57       | 1,99 | No  |
| ENSMUSG00000066538 | -3,37E-02 | 4,605415029  | 1,82E-01  | 6,69E-01 | 8,88E-01 | Gm6254        | 0,98 | No  |
| ENSMUSG00000066543 | -3,14E-01 | 6,334240186  | 2,45E+01  | 7,54E-07 | 3,47E-05 | Rpl17-ps9     | 0,80 | Yes |
| ENSMUSG00000066551 | 3,69E-02  | 6,352117019  | 3,38E-01  | 5,61E-01 | 8,24E-01 | Hmgb1         | 1,03 | No  |
| ENSMUSG00000066553 | -1,47E-01 | 5,816683632  | 4,87E+00  | 2,73E-02 | 1,86E-01 | Gm6969        | 0,90 | No  |
| ENSMUSG00000066554 | -5,04E-02 | 6,839489674  | 6,77E-01  | 4,11E-01 | 7,07E-01 | Gm10167       | 0,97 | No  |
| ENSMUSG00000066568 | 5,63E-02  | 6,758741566  | 8,34E-01  | 3,61E-01 | 6,62E-01 | Lsm14a        | 1,04 | No  |
| ENSMUSG00000066571 | 1,60E-01  | 5,165493408  | 4,85E+00  | 2,76E-02 | 1,87E-01 | 4931406P16Rik | 1,12 | No  |
| ENSMUSG00000066592 | -1,17E-01 | 2,274118366  | 7,48E-01  | 3,87E-01 | 6,87E-01 | Gm7589        | 0,92 | No  |
| ENSMUSG00000066595 | 9,22E-02  | 5,328857985  | 1,71E+00  | 1,91E-01 | 5,50E-01 | Mfsd7b        | 1,07 | No  |
| ENSMUSG00000066607 | -1,38E+00 | -1,574036049 | 5,48E+00  | 1,92E-02 | 1,47E-01 | 6030419C18Rik | 0,38 | No  |
| ENSMUSG00000066613 | 4,32E-02  | 3,069968397  | 1,53E-01  | 6,96E-01 | 9,03E-01 | Zfp932        | 1,03 | No  |



|                    |           |              |           |          |          |           |      |     |
|--------------------|-----------|--------------|-----------|----------|----------|-----------|------|-----|
| ENSMUSG00000066621 | -1,02E-01 | 7,004753925  | 2,81E+00  | 9,36E-02 | 3,83E-01 | Tecpr1    | 0,93 | No  |
| ENSMUSG00000066626 | -4,88E-01 | 1,661739914  | 8,69E+00  | 3,20E-03 | 4,02E-02 | Gm5121    | 0,71 | Yes |
| ENSMUSG00000066629 | -3,39E-01 | 3,361414542  | 1,10E+01  | 9,19E-04 | 1,51E-02 | Rpl36-ps3 | 0,79 | Yes |
| ENSMUSG00000066632 | 1,40E-01  | 8,385744631  | 5,88E+00  | 1,53E-02 | 1,28E-01 | Pgk1-rs7  | 1,10 | No  |
| ENSMUSG00000066637 | 1,31E-01  | 1,086843544  | 4,13E-01  | 5,20E-01 | 7,99E-01 | Ttc32     | 1,10 | No  |
| ENSMUSG00000066640 | -9,27E-02 | 4,955633658  | 1,57E+00  | 2,10E-01 | 5,50E-01 | Fbxl18    | 0,94 | No  |
| ENSMUSG00000066643 | -1,29E-03 | 0,948146293  | 3,76E-05  | 9,95E-01 | 1,00E+00 | Wdr35     | 1,00 | No  |
| ENSMUSG00000066647 | 5,27E-01  | 1,649315628  | 1,04E+01  | 1,23E-03 | 1,92E-02 | Gm5113    | 1,44 | Yes |
| ENSMUSG00000066652 | -3,13E-01 | -2,740768279 | 7,17E-02  | 7,89E-01 | 9,54E-01 | Lefty2    | 0,80 | No  |
| ENSMUSG00000066671 | -3,83E-02 | -3,107651936 | -7,91E-11 | 1,00E+00 | 1,00E+00 | Olfr220   | 0,97 | No  |
| ENSMUSG00000066672 | 2,85E-01  | -2,54820566  | 8,25E-02  | 7,74E-01 | 9,44E-01 | Olfr417   | 1,22 | No  |
| ENSMUSG00000066677 | -3,33E-01 | -0,627605077 | 8,48E-01  | 3,57E-01 | 6,58E-01 | Ifi208    | 0,79 | No  |
| ENSMUSG00000066682 | -2,79E-01 | 4,472098132  | 1,18E+01  | 5,90E-04 | 1,05E-02 | Pilrb2    | 0,82 | Yes |
| ENSMUSG00000066684 | -3,00E-01 | 4,926649941  | 1,60E+01  | 6,22E-05 | 1,63E-03 | Pilrb1    | 0,81 | Yes |
| ENSMUSG00000066687 | -4,78E-01 | -1,088742076 | 1,11E+00  | 2,92E-01 | 5,87E-01 | Zbtb16    | 0,72 | No  |
| ENSMUSG00000066693 | 3,24E-01  | -1,561217675 | 3,65E-01  | 5,46E-01 | 8,14E-01 | Gm7493    | 1,25 | No  |
| ENSMUSG00000066705 | -3,68E-01 | -2,35557     | 1,70E-01  | 6,80E-01 | 8,93E-01 | Fxyd6     | 0,78 | No  |
| ENSMUSG00000066714 | 1,81E+00  | -3,10765737  | 1,28E+00  | 2,58E-01 | 5,50E-01 | Gm8062    | 3,49 | No  |
| ENSMUSG00000066720 | -1,96E-01 | -1,448702888 | 1,22E-01  | 7,27E-01 | 9,19E-01 | Cldn9     | 0,87 | No  |
| ENSMUSG00000066721 | 7,05E-01  | -2,832012839 | 2,71E-01  | 6,03E-01 | 8,48E-01 | Zfp575    | 1,63 | No  |
| ENSMUSG00000066724 | -1,96E-02 | 6,283539376  | 9,41E-02  | 7,59E-01 | 9,36E-01 | Gm10175   | 0,99 | No  |
| ENSMUSG00000066735 | 1,03E-01  | 5,535784462  | 2,26E+00  | 1,33E-01 | 4,58E-01 | Vkorc111  | 1,07 | No  |
| ENSMUSG00000066749 | -1,89E+00 | -3,1076441   | 1,42E+00  | 2,33E-01 | 5,50E-01 | Olfr877   | 0,27 | No  |
| ENSMUSG00000066752 | -2,80E-02 | -2,963263871 | 3,49E-04  | 9,85E-01 | 1,00E+00 | Gm10176   | 0,98 | No  |
| ENSMUSG00000066755 | -1,38E-01 | 1,079104368  | 4,82E-01  | 4,88E-01 | 7,75E-01 | Tnfsf18   | 0,91 | No  |
| ENSMUSG00000066760 | -2,66E+00 | -2,896093238 | 2,81E+00  | 9,35E-02 | 3,83E-01 | Psg16     | 0,16 | No  |
| ENSMUSG00000066771 | -3,83E-02 | -3,107651936 | -7,91E-11 | 1,00E+00 | 1,00E+00 | Gm5614    | 0,97 | No  |
| ENSMUSG00000066798 | -2,90E-02 | 4,350434122  | 1,22E-01  | 7,27E-01 | 9,19E-01 | Zbtb6     | 0,98 | No  |
| ENSMUSG00000066800 | 2,14E-01  | 6,586534041  | 1,17E+01  | 6,30E-04 | 1,11E-02 | Rnasel    | 1,16 | Yes |
| ENSMUSG00000066807 | 1,07E-01  | 3,340736367  | 1,06E+00  | 3,03E-01 | 5,99E-01 | Gm10179   | 1,08 | No  |
| ENSMUSG00000066809 | -1,78E-01 | 4,980943822  | 5,65E+00  | 1,75E-02 | 1,38E-01 | Gm10180   | 0,88 | No  |
| ENSMUSG00000066829 | -8,05E-03 | 3,979094547  | 8,29E-03  | 9,27E-01 | 1,00E+00 | Zfp810    | 0,99 | No  |

|                    |           |              |           |          |          |             |      |     |
|--------------------|-----------|--------------|-----------|----------|----------|-------------|------|-----|
| ENSMUSG00000066838 | 6,39E-03  | 1,750239416  | 1,59E-03  | 9,68E-01 | 1,00E+00 | Zfp772      | 1,00 | No  |
| ENSMUSG00000066839 | -1,01E-02 | 3,628794819  | 1,06E-02  | 9,18E-01 | 1,00E+00 | Ecsit       | 0,99 | No  |
| ENSMUSG00000066842 | -8,55E-01 | -2,831988613 | 4,01E-01  | 5,27E-01 | 8,03E-01 | Hmcn1       | 0,55 | No  |
| ENSMUSG00000066861 | -6,45E-02 | 4,173404472  | 5,72E-01  | 4,49E-01 | 7,40E-01 | Oas1g       | 0,96 | No  |
| ENSMUSG00000066867 | 1,87E+00  | -3,107639691 | 1,38E+00  | 2,40E-01 | 5,50E-01 | Oas1e       | 3,67 | No  |
| ENSMUSG00000066877 | -5,58E-01 | 4,614328997  | 5,02E+01  | 1,41E-12 | 1,70E-10 | Nck2        | 0,68 | Yes |
| ENSMUSG00000066878 | 1,69E-01  | 6,610648414  | 7,39E+00  | 6,54E-03 | 6,83E-02 | Gm10184     | 1,12 | No  |
| ENSMUSG00000066880 | 7,82E-02  | 3,540922297  | 6,37E-01  | 4,25E-01 | 7,19E-01 | Zfp617      | 1,06 | No  |
| ENSMUSG00000066892 | -1,51E-01 | 4,455541611  | 3,49E+00  | 6,17E-02 | 3,09E-01 | Fbxl12      | 0,90 | No  |
| ENSMUSG00000066894 | -5,92E-01 | 3,681160001  | 3,99E+01  | 2,71E-10 | 2,40E-08 | Vsig10      | 0,66 | Yes |
| ENSMUSG00000066896 | 1,87E+00  | -3,033632735 | 1,36E+00  | 2,43E-01 | 5,50E-01 | Olfr18      | 3,66 | No  |
| ENSMUSG00000066900 | -1,46E-01 | 6,161696717  | 5,16E+00  | 2,31E-02 | 1,66E-01 | Suds3       | 0,90 | No  |
| ENSMUSG00000066902 | -2,26E-01 | 5,491662926  | 1,07E+01  | 1,08E-03 | 1,72E-02 | Rps23-ps2   | 0,86 | Yes |
| ENSMUSG00000066912 | 9,01E-03  | -3,107646452 | -5,16E-10 | 1,00E+00 | 1,00E+00 | Olfr833-ps1 | 1,01 | No  |
| ENSMUSG00000066938 | 1,39E+00  | -2,998019645 | 8,86E-01  | 3,47E-01 | 6,47E-01 | Gm10190     | 2,61 | No  |
| ENSMUSG00000066952 | 9,42E-02  | 5,22020047   | 1,72E+00  | 1,90E-01 | 5,50E-01 | Myo1h       | 1,07 | No  |
| ENSMUSG00000066958 | -9,43E-01 | -2,548210112 | 7,79E-01  | 3,78E-01 | 6,78E-01 | Gm16391     | 0,52 | No  |
| ENSMUSG00000066975 | 1,07E-01  | -1,831986194 | 2,51E-02  | 8,74E-01 | 1,00E+00 | Cryba4      | 1,08 | No  |
| ENSMUSG00000066979 | 2,45E-02  | 6,16751089   | 1,44E-01  | 7,04E-01 | 9,06E-01 | Bub3        | 1,02 | No  |
| ENSMUSG00000066983 | -5,88E-02 | -3,033652696 | 1,62E-03  | 9,68E-01 | 1,00E+00 | Gm16519     | 0,96 | No  |
| ENSMUSG00000067001 | -7,04E-01 | -2,497500393 | 5,54E-01  | 4,57E-01 | 7,46E-01 | Serpib7     | 0,61 | No  |
| ENSMUSG00000067017 | 1,66E-03  | 7,755789411  | 8,02E-04  | 9,77E-01 | 1,00E+00 | Gm3608      | 1,00 | No  |
| ENSMUSG00000067038 | -1,24E-01 | 7,857601971  | 4,48E+00  | 3,43E-02 | 2,18E-01 | Rps12-ps3   | 0,92 | No  |
| ENSMUSG00000067049 | 1,56E-01  | -1,627547145 | 7,32E-02  | 7,87E-01 | 9,53E-01 | Unc93a      | 1,11 | No  |
| ENSMUSG00000067058 | -2,86E-01 | 6,94474124   | 2,22E+01  | 2,49E-06 | 9,81E-05 | Rps15a-ps5  | 0,82 | Yes |
| ENSMUSG00000067063 | 1,81E+00  | -3,10765737  | 1,28E+00  | 2,58E-01 | 5,50E-01 | Gm6990      | 3,49 | No  |
| ENSMUSG00000067071 | 8,06E-02  | 4,940913575  | 1,18E+00  | 2,78E-01 | 5,75E-01 | Hes6        | 1,06 | No  |
| ENSMUSG00000067085 | -8,11E-02 | 1,644722846  | 2,32E-01  | 6,30E-01 | 8,62E-01 | Gm10197     | 0,95 | No  |
| ENSMUSG00000067106 | 9,35E-02  | 5,649676699  | 1,88E+00  | 1,70E-01 | 5,26E-01 | Gm5529      | 1,07 | No  |
| ENSMUSG00000067121 | -1,64E-01 | 5,849707869  | 6,11E+00  | 1,34E-02 | 1,16E-01 | Gm7027      | 0,89 | No  |
| ENSMUSG00000067144 | 3,14E-02  | -3,107617333 | -7,69E-10 | 1,00E+00 | 1,00E+00 | Slc22a7     | 1,02 | No  |
| ENSMUSG00000067148 | -4,61E-02 | 4,253497619  | 3,02E-01  | 5,82E-01 | 8,38E-01 | Polr1c      | 0,97 | No  |

|                    |           |              |          |          |          |               |      |     |
|--------------------|-----------|--------------|----------|----------|----------|---------------|------|-----|
| ENSMUSG00000067149 | -5,07E-01 | -1,929354894 | 6,22E-01 | 4,30E-01 | 7,24E-01 | Jchain        | 0,70 | No  |
| ENSMUSG00000067150 | 2,14E-01  | 4,961220936  | 8,27E+00 | 4,03E-03 | 4,75E-02 | Xpo5          | 1,16 | Yes |
| ENSMUSG00000067156 | 1,85E+00  | -3,107657832 | 1,35E+00 | 2,46E-01 | 5,50E-01 | Gm7337        | 3,61 | No  |
| ENSMUSG00000067158 | 2,50E-01  | -0,847863632 | 3,27E-01 | 5,68E-01 | 8,29E-01 | Col4a4        | 1,19 | No  |
| ENSMUSG00000067161 | 4,84E-02  | 7,029325024  | 6,35E-01 | 4,25E-01 | 7,20E-01 | Gm5560        | 1,03 | No  |
| ENSMUSG00000067186 | -5,88E-02 | -3,033652696 | 1,62E-03 | 9,68E-01 | 1,00E+00 | Olf132        | 0,96 | No  |
| ENSMUSG00000067189 | 9,40E-02  | 1,569299653  | 2,96E-01 | 5,86E-01 | 8,39E-01 | Gm7335        | 1,07 | No  |
| ENSMUSG00000067199 | 1,33E-01  | 2,005940885  | 7,94E-01 | 3,73E-01 | 6,74E-01 | Frat1         | 1,10 | No  |
| ENSMUSG00000067203 | -2,00E-01 | 3,36792696   | 3,95E+00 | 4,69E-02 | 2,59E-01 | H2-K2         | 0,87 | No  |
| ENSMUSG00000067206 | 6,86E-02  | -0,831885979 | 2,63E-02 | 8,71E-01 | 1,00E+00 | Lrrc66        | 1,05 | No  |
| ENSMUSG00000067212 | -2,55E-01 | 7,93293569   | 1,92E+01 | 1,21E-05 | 3,97E-04 | H2-T23        | 0,84 | Yes |
| ENSMUSG00000067219 | -3,66E-01 | 2,026697129  | 6,69E+00 | 9,72E-03 | 9,14E-02 | Nipal1        | 0,78 | No  |
| ENSMUSG00000067224 | -1,13E-01 | -0,367041043 | 1,17E-01 | 7,32E-01 | 9,22E-01 | Gm3695        | 0,92 | No  |
| ENSMUSG00000067235 | -4,46E-01 | 1,410894713  | 6,44E+00 | 1,12E-02 | 1,01E-01 | H2-Q10        | 0,73 | No  |
| ENSMUSG00000067274 | -1,72E-01 | 9,017943648  | 9,17E+00 | 2,46E-03 | 3,29E-02 | Rplp0         | 0,89 | Yes |
| ENSMUSG00000067279 | 2,57E+00  | -3,0336723   | 2,56E+00 | 1,10E-01 | 4,06E-01 | Ppp1r3c       | 5,96 | No  |
| ENSMUSG00000067288 | -2,42E-01 | 3,112207408  | 5,02E+00 | 2,50E-02 | 1,75E-01 | Rps28         | 0,85 | No  |
| ENSMUSG00000067297 | 4,27E-01  | -1,770551402 | 3,97E-01 | 5,29E-01 | 8,04E-01 | Ifit1bl2      | 1,34 | No  |
| ENSMUSG00000067321 | -3,26E-02 | 3,062445109  | 8,50E-02 | 7,71E-01 | 9,42E-01 | Gm7931        | 0,98 | No  |
| ENSMUSG00000067336 | 1,12E-01  | 6,340016156  | 3,12E+00 | 7,71E-02 | 3,54E-01 | Bmpr2         | 1,08 | No  |
| ENSMUSG00000067338 | 7,31E-01  | -2,963267542 | 2,91E-01 | 5,90E-01 | 8,41E-01 | Tuba3b        | 1,66 | No  |
| ENSMUSG00000067341 | -4,26E-01 | 4,032680885  | 2,43E+01 | 8,36E-07 | 3,81E-05 | H2-Eb2        | 0,74 | Yes |
| ENSMUSG00000067344 | -1,43E-01 | 7,281114431  | 5,69E+00 | 1,70E-02 | 1,36E-01 | Rps25-ps1     | 0,91 | No  |
| ENSMUSG00000067351 | -3,94E-01 | 1,805405462  | 6,00E+00 | 1,43E-02 | 1,22E-01 | Rps15a-ps2    | 0,76 | No  |
| ENSMUSG00000067352 | -2,70E+00 | -2,96323619  | 2,89E+00 | 8,89E-02 | 3,79E-01 | Gm14149       | 0,15 | No  |
| ENSMUSG00000067356 | -3,18E-02 | -0,683053837 | 7,42E-03 | 9,31E-01 | 1,00E+00 | B430203G13Rik | 0,98 | No  |
| ENSMUSG00000067365 | -1,45E-01 | 5,250411219  | 4,13E+00 | 4,21E-02 | 2,44E-01 | Tmem128       | 0,90 | No  |
| ENSMUSG00000067367 | 1,45E-01  | 3,928758544  | 2,59E+00 | 1,08E-01 | 4,02E-01 | Lyar          | 1,11 | No  |
| ENSMUSG00000067370 | 1,03E-01  | 2,73848757   | 7,31E-01 | 3,93E-01 | 6,93E-01 | B3galt4       | 1,07 | No  |
| ENSMUSG00000067389 | 1,84E-01  | 3,010795413  | 2,59E+00 | 1,08E-01 | 4,02E-01 | Gm17080       | 1,14 | No  |
| ENSMUSG00000067399 | -4,04E-01 | 0,40977336   | 2,78E+00 | 9,57E-02 | 3,86E-01 | Trim43c       | 0,76 | No  |
| ENSMUSG00000067424 | -2,02E-01 | 1,890190966  | 1,83E+00 | 1,77E-01 | 5,36E-01 | Zfp563        | 0,87 | No  |

|                    |           |              |          |          |          |               |      |     |
|--------------------|-----------|--------------|----------|----------|----------|---------------|------|-----|
| ENSMUSG00000067430 | 2,66E-01  | 1,388794783  | 2,19E+00 | 1,39E-01 | 4,70E-01 | Zfp763        | 1,20 | No  |
| ENSMUSG00000067455 | 1,32E+00  | -1,497665348 | 5,11E+00 | 2,38E-02 | 1,69E-01 | Hist1h4j      | 2,50 | No  |
| ENSMUSG00000067522 | 3,10E+00  | -2,896176679 | 3,91E+00 | 4,79E-02 | 2,63E-01 | Olfr76        | 8,56 | No  |
| ENSMUSG00000067525 | -1,94E+00 | -3,107619243 | 1,50E+00 | 2,21E-01 | 5,50E-01 | Olfr1427      | 0,26 | No  |
| ENSMUSG00000067528 | -7,94E-01 | -2,896102912 | 3,44E-01 | 5,57E-01 | 8,21E-01 | Olfr1424      | 0,58 | No  |
| ENSMUSG00000067529 | -1,96E-02 | -2,600667835 | 3,82E-04 | 9,84E-01 | 1,00E+00 | Olfr1423      | 0,99 | No  |
| ENSMUSG00000067547 | -1,04E-02 | 5,438354673  | 2,23E-02 | 8,81E-01 | 1,00E+00 | Gm7666        | 0,99 | No  |
| ENSMUSG00000067571 | -2,71E+00 | -3,033620915 | 2,92E+00 | 8,75E-02 | 3,78E-01 | Ms4a15        | 0,15 | No  |
| ENSMUSG00000067575 | -2,25E-01 | 5,974471063  | 1,18E+01 | 6,08E-04 | 1,08E-02 | Rpl35a-ps3    | 0,86 | Yes |
| ENSMUSG00000067577 | -3,33E-01 | -0,800778477 | 7,59E-01 | 3,84E-01 | 6,85E-01 | A430093F15Rik | 0,79 | No  |
| ENSMUSG00000067586 | -4,68E-01 | 4,897151521  | 3,86E+01 | 5,08E-10 | 4,35E-08 | S1pr3         | 0,72 | Yes |
| ENSMUSG00000067591 | 5,27E-01  | 1,385568298  | 7,75E+00 | 5,37E-03 | 5,89E-02 | Klra3         | 1,44 | No  |
| ENSMUSG00000067594 | 1,82E+00  | -2,963253027 | 1,31E+00 | 2,52E-01 | 5,50E-01 | Krt77         | 3,53 | No  |
| ENSMUSG00000067608 | 1,93E-01  | 7,343238339  | 1,05E+01 | 1,20E-03 | 1,88E-02 | Pcna-ps2      | 1,14 | Yes |
| ENSMUSG00000067610 | 1,28E+00  | -0,401615651 | 1,50E+01 | 1,07E-04 | 2,58E-03 | Klri1         | 2,43 | Yes |
| ENSMUSG00000067614 | -1,94E+00 | -3,107619243 | 1,50E+00 | 2,21E-01 | 5,50E-01 | Krt86         | 0,26 | No  |
| ENSMUSG00000067615 | 6,96E-01  | -2,832055333 | 2,64E-01 | 6,07E-01 | 8,50E-01 | Krt81         | 1,62 | No  |
| ENSMUSG00000067629 | 2,22E-01  | -0,289524439 | 4,67E-01 | 4,94E-01 | 7,80E-01 | Syngap1       | 1,17 | No  |
| ENSMUSG00000067642 | 1,04E-01  | -0,098152348 | 1,22E-01 | 7,27E-01 | 9,19E-01 | Adgrf3        | 1,07 | No  |
| ENSMUSG00000067653 | 9,87E-02  | 1,825162973  | 3,91E-01 | 5,32E-01 | 8,05E-01 | Ankrd23       | 1,07 | No  |
| ENSMUSG00000067704 | 1,22E+00  | -2,77065262  | 9,15E-01 | 3,39E-01 | 6,39E-01 | Wfdc13        | 2,32 | No  |
| ENSMUSG00000067713 | -4,60E-02 | 5,457575439  | 4,36E-01 | 5,09E-01 | 7,92E-01 | Prkag1        | 0,97 | No  |
| ENSMUSG00000067714 | 5,54E-01  | 2,841094408  | 2,33E+01 | 1,41E-06 | 6,02E-05 | Lpar5         | 1,47 | Yes |
| ENSMUSG00000067719 | -8,27E-02 | 7,060967634  | 1,87E+00 | 1,72E-01 | 5,28E-01 | Gm10221       | 0,94 | No  |
| ENSMUSG00000067722 | 1,13E-03  | 4,087011108  | 1,69E-04 | 9,90E-01 | 1,00E+00 | BC003965      | 1,00 | No  |
| ENSMUSG00000067724 | 5,81E-01  | -2,268120066 | 5,73E-01 | 4,49E-01 | 7,39E-01 | Gbx1          | 1,50 | No  |
| ENSMUSG00000067736 | 7,98E-02  | 8,285143663  | 1,91E+00 | 1,67E-01 | 5,20E-01 | Gm10222       | 1,06 | No  |
| ENSMUSG00000067750 | -1,03E+00 | -1,800969748 | 2,71E+00 | 9,95E-02 | 3,92E-01 | Khdc1a        | 0,49 | No  |
| ENSMUSG00000067767 | 1,83E+00  | -1,655092009 | 7,02E+00 | 8,05E-03 | 7,94E-02 | Clec4b2       | 3,56 | No  |
| ENSMUSG00000067780 | -2,71E+00 | -2,832006336 | 2,90E+00 | 8,84E-02 | 3,79E-01 | Pi15          | 0,15 | No  |
| ENSMUSG00000067786 | 2,94E-01  | 1,867235782  | 3,19E+00 | 7,43E-02 | 3,47E-01 | Nnat          | 1,23 | No  |
| ENSMUSG00000067787 | 4,05E-02  | 5,405878936  | 3,36E-01 | 5,62E-01 | 8,25E-01 | Blcap         | 1,03 | No  |

|                    |           |              |           |          |          |               |  |      |     |
|--------------------|-----------|--------------|-----------|----------|----------|---------------|--|------|-----|
| ENSMUSG00000067813 | 1,85E+00  | -3,107657832 | 1,35E+00  | 2,46E-01 | 5,50E-01 | Xkr9          |  | 3,61 | No  |
| ENSMUSG00000067818 | -3,83E-02 | -3,107651936 | -7,91E-11 | 1,00E+00 | 1,00E+00 | Myl9          |  | 0,97 | No  |
| ENSMUSG00000067825 | -9,88E-02 | 4,409611625  | 1,51E+00  | 2,19E-01 | 5,50E-01 | Pex26         |  | 0,93 | No  |
| ENSMUSG00000067847 | -1,26E-01 | 4,044385128  | 2,03E+00  | 1,54E-01 | 4,97E-01 | Romo1         |  | 0,92 | No  |
| ENSMUSG00000067851 | -9,02E-02 | 7,228674423  | 2,27E+00  | 1,32E-01 | 4,57E-01 | Arfgef1       |  | 0,94 | No  |
| ENSMUSG00000067869 | -1,05E-01 | 5,518221296  | 2,33E+00  | 1,27E-01 | 4,47E-01 | Tcea1-ps1     |  | 0,93 | No  |
| ENSMUSG00000067870 | -2,12E-01 | 8,149914916  | 1,34E+01  | 2,47E-04 | 5,19E-03 | Rpl31-ps8     |  | 0,86 | Yes |
| ENSMUSG00000067872 | 5,41E-01  | -2,424882313 | 2,77E-01  | 5,99E-01 | 8,46E-01 | Ccdc87        |  | 1,45 | No  |
| ENSMUSG00000067879 | -2,57E-01 | -2,52270685  | 7,17E-02  | 7,89E-01 | 9,54E-01 | 3110035E14Rik |  | 0,84 | No  |
| ENSMUSG00000067882 | 2,61E+00  | -3,033672762 | 2,63E+00  | 1,05E-01 | 3,97E-01 | Casp16-ps     |  | 6,10 | No  |
| ENSMUSG00000067889 | -4,66E-02 | 1,335884385  | 6,66E-02  | 7,96E-01 | 9,58E-01 | Sptbn2        |  | 0,97 | No  |
| ENSMUSG00000067916 | 1,15E-01  | 5,820576408  | 2,97E+00  | 8,47E-02 | 3,73E-01 | Zfp991        |  | 1,08 | No  |
| ENSMUSG00000067919 | -1,74E+00 | -2,548120733 | 2,10E+00  | 1,47E-01 | 4,86E-01 | Rex2          |  | 0,30 | No  |
| ENSMUSG00000067928 | 8,60E-02  | 1,472019091  | 2,51E-01  | 6,16E-01 | 8,55E-01 | Zfp760        |  | 1,06 | No  |
| ENSMUSG00000067929 | 2,06E-01  | 0,556956471  | 7,32E-01  | 3,92E-01 | 6,93E-01 | Gm10226       |  | 1,15 | No  |
| ENSMUSG00000067931 | 1,17E-01  | 4,114684675  | 1,79E+00  | 1,81E-01 | 5,42E-01 | Zfp948        |  | 1,08 | No  |
| ENSMUSG00000067941 | -1,06E-01 | -3,033634182 | 5,86E-03  | 9,39E-01 | 1,00E+00 | Gm7168        |  | 0,93 | No  |
| ENSMUSG00000067942 | -1,72E-01 | 3,504491614  | 3,26E+00  | 7,10E-02 | 3,37E-01 | Zfp160        |  | 0,89 | No  |
| ENSMUSG00000067949 | -1,94E+00 | -3,107619243 | 1,50E+00  | 2,21E-01 | 5,50E-01 | Vmn1r-ps144   |  | 0,26 | No  |
| ENSMUSG00000067995 | -5,57E-02 | 4,684327376  | 5,08E-01  | 4,76E-01 | 7,64E-01 | Gtf2f2        |  | 0,96 | No  |
| ENSMUSG00000067996 | 1,56E+00  | -2,711767707 | 1,67E+00  | 1,96E-01 | 5,50E-01 | Bpifb9b       |  | 2,95 | No  |
| ENSMUSG00000067998 | -1,94E+00 | -3,107619243 | 1,50E+00  | 2,21E-01 | 5,50E-01 | Bpifb9a       |  | 0,26 | No  |
| ENSMUSG00000068011 | 6,94E-01  | -2,89617475  | 2,61E-01  | 6,09E-01 | 8,51E-01 | Mkrn2os       |  | 1,62 | No  |
| ENSMUSG00000068015 | 3,28E-02  | 5,204108014  | 2,06E-01  | 6,50E-01 | 8,76E-01 | Lrch1         |  | 1,02 | No  |
| ENSMUSG00000068036 | 1,31E-01  | 7,082351782  | 4,67E+00  | 3,06E-02 | 2,02E-01 | Afdn          |  | 1,09 | No  |
| ENSMUSG00000068037 | 1,25E+00  | -2,770629487 | 9,72E-01  | 3,24E-01 | 6,25E-01 | Mas1          |  | 2,38 | No  |
| ENSMUSG00000068039 | -1,41E-01 | 7,970767558  | 5,90E+00  | 1,52E-02 | 1,27E-01 | Tcp1          |  | 0,91 | No  |
| ENSMUSG00000068040 | 4,60E-02  | 6,236158273  | 5,18E-01  | 4,72E-01 | 7,60E-01 | Tm9sf4        |  | 1,03 | No  |
| ENSMUSG00000068062 | 2,65E+00  | -3,033655087 | 2,73E+00  | 9,86E-02 | 3,91E-01 | Gm14164       |  | 6,30 | No  |
| ENSMUSG00000068079 | 1,85E+00  | -3,107657832 | 1,35E+00  | 2,46E-01 | 5,50E-01 | Tcf15         |  | 3,61 | No  |
| ENSMUSG00000068099 | -3,83E-02 | -3,107651936 | -7,91E-11 | 1,00E+00 | 1,00E+00 | 1500009C09Rik |  | 0,97 | No  |
| ENSMUSG00000068101 | 3,62E-01  | 2,475451744  | 7,53E+00  | 6,07E-03 | 6,47E-02 | Cenpm         |  | 1,29 | No  |

|                    |           |              |           |          |          |           |      |     |
|--------------------|-----------|--------------|-----------|----------|----------|-----------|------|-----|
| ENSMUSG00000068105 | -2,83E-01 | 0,214443115  | 1,16E+00  | 2,81E-01 | 5,77E-01 | Tnfrsf13c | 0,82 | No  |
| ENSMUSG00000068114 | 2,25E-01  | 3,981904228  | 6,26E+00  | 1,23E-02 | 1,09E-01 | Ccdc134   | 1,17 | No  |
| ENSMUSG00000068115 | 2,25E-01  | 1,676358981  | 1,84E+00  | 1,75E-01 | 5,33E-01 | Ninl      | 1,17 | No  |
| ENSMUSG00000068120 | -4,89E-02 | 6,298390396  | 5,90E-01  | 4,42E-01 | 7,34E-01 | Gm10231   | 0,97 | No  |
| ENSMUSG00000068129 | -2,31E-01 | 0,966582609  | 1,22E+00  | 2,69E-01 | 5,65E-01 | Cst7      | 0,85 | No  |
| ENSMUSG00000068130 | -5,72E-02 | 0,76821088   | 6,78E-02  | 7,95E-01 | 9,56E-01 | Zfp442    | 0,96 | No  |
| ENSMUSG00000068134 | 1,02E-01  | 4,597775948  | 1,67E+00  | 1,96E-01 | 5,50E-01 | Zfp120    | 1,07 | No  |
| ENSMUSG00000068141 | 1,03E-02  | 5,59909193   | 2,27E-02  | 8,80E-01 | 1,00E+00 | Gm10232   | 1,01 | No  |
| ENSMUSG00000068154 | -7,68E-01 | 1,56354401   | 2,13E+01  | 3,98E-06 | 1,49E-04 | Insm1     | 0,59 | Yes |
| ENSMUSG00000068165 | 1,39E-02  | 4,551746786  | 2,99E-02  | 8,63E-01 | 9,97E-01 | Gm10233   | 1,01 | No  |
| ENSMUSG00000068167 | 1,81E+00  | -3,10765737  | 1,28E+00  | 2,58E-01 | 5,50E-01 | Csnka2ip  | 3,49 | No  |
| ENSMUSG00000068184 | -1,09E-01 | 2,426938948  | 6,77E-01  | 4,11E-01 | 7,07E-01 | Ndufaf2   | 0,93 | No  |
| ENSMUSG00000068196 | -3,57E+00 | -2,711681187 | 5,73E+00  | 1,66E-02 | 1,34E-01 | Col8a1    | 0,08 | No  |
| ENSMUSG00000068205 | -2,96E-02 | 0,379507687  | 1,39E-02  | 9,06E-01 | 1,00E+00 | MacroD2   | 0,98 | No  |
| ENSMUSG00000068206 | 6,06E-02  | 3,567229962  | 3,84E-01  | 5,36E-01 | 8,08E-01 | Pick1     | 1,04 | No  |
| ENSMUSG00000068220 | 1,31E-01  | 7,990804128  | 5,04E+00  | 2,48E-02 | 1,74E-01 | Lgals1    | 1,09 | No  |
| ENSMUSG00000068226 | 1,50E-01  | 1,514765136  | 7,23E-01  | 3,95E-01 | 6,96E-01 | Gm6723    | 1,11 | No  |
| ENSMUSG00000068227 | 1,60E-01  | -1,574179011 | 8,35E-02  | 7,73E-01 | 9,44E-01 | Il2rb     | 1,12 | No  |
| ENSMUSG00000068240 | -2,04E-01 | 8,645458695  | 1,27E+01  | 3,64E-04 | 7,08E-03 | Gm11808   | 0,87 | Yes |
| ENSMUSG00000068245 | -5,50E-02 | 1,705290742  | 1,12E-01  | 7,37E-01 | 9,25E-01 | Phf11d    | 0,96 | No  |
| ENSMUSG00000068246 | -1,69E+00 | -2,401240471 | 3,16E+00  | 7,53E-02 | 3,49E-01 | Apol9b    | 0,31 | No  |
| ENSMUSG00000068250 | -1,59E-01 | 4,144078639  | 3,51E+00  | 6,11E-02 | 3,07E-01 | Amn1      | 0,90 | No  |
| ENSMUSG00000068252 | -3,83E-02 | -3,107651936 | -7,91E-11 | 1,00E+00 | 1,00E+00 | Apol7b    | 0,97 | No  |
| ENSMUSG00000068259 | -2,51E-01 | -1,997921343 | 1,24E-01  | 7,25E-01 | 9,18E-01 | Olfr461   | 0,84 | No  |
| ENSMUSG00000068262 | -9,96E-02 | 6,554771382  | 2,54E+00  | 1,11E-01 | 4,08E-01 | Gm5879    | 0,93 | No  |
| ENSMUSG00000068263 | -6,59E-01 | -0,170584437 | 4,44E+00  | 3,51E-02 | 2,22E-01 | Efcc1     | 0,63 | No  |
| ENSMUSG00000068264 | 3,04E-03  | 4,370293172  | 1,36E-03  | 9,71E-01 | 1,00E+00 | Ap5s1     | 1,00 | No  |
| ENSMUSG00000068267 | 1,10E-01  | 7,809706074  | 3,49E+00  | 6,18E-02 | 3,09E-01 | Cenpb     | 1,08 | No  |
| ENSMUSG00000068284 | 1,42E-03  | 6,407348797  | 5,11E-04  | 9,82E-01 | 1,00E+00 | Usf3      | 1,00 | No  |
| ENSMUSG00000068289 | -7,69E-02 | -2,963220349 | 2,69E-03  | 9,59E-01 | 1,00E+00 | Cma2      | 0,95 | No  |
| ENSMUSG00000068290 | 1,10E-01  | 4,819465319  | 2,08E+00  | 1,49E-01 | 4,90E-01 | Ddrk1     | 1,08 | No  |
| ENSMUSG00000068299 | 1,44E-01  | 0,776175005  | 4,31E-01  | 5,12E-01 | 7,94E-01 | Nat8f4    | 1,11 | No  |

|                    |           |              |          |          |          |               |      |     |
|--------------------|-----------|--------------|----------|----------|----------|---------------|------|-----|
| ENSMUSG00000068303 | 1,57E+00  | -2,226323696 | 2,70E+00 | 1,01E-01 | 3,92E-01 | Spr-ps1       | 2,97 | No  |
| ENSMUSG00000068314 | 1,36E-01  | -1,070151694 | 9,30E-02 | 7,60E-01 | 9,37E-01 | Gm6899        | 1,10 | No  |
| ENSMUSG00000068323 | 1,86E-01  | -0,257666459 | 3,49E-01 | 5,54E-01 | 8,20E-01 | Slc4a5        | 1,14 | No  |
| ENSMUSG00000068324 | -2,59E-01 | 4,204835274  | 9,17E+00 | 2,46E-03 | 3,29E-02 | Gm10029       | 0,84 | Yes |
| ENSMUSG00000068327 | -7,45E-01 | 1,192042769  | 1,60E+01 | 6,18E-05 | 1,62E-03 | Tlx2          | 0,60 | Yes |
| ENSMUSG00000068328 | -6,41E-02 | 6,543720636  | 1,06E+00 | 3,04E-01 | 6,01E-01 | Aup1          | 0,96 | No  |
| ENSMUSG00000068329 | -2,45E-01 | 6,233952624  | 1,47E+01 | 1,26E-04 | 2,95E-03 | Htra2         | 0,84 | Yes |
| ENSMUSG00000068335 | -4,29E-01 | 6,044743189  | 4,39E+01 | 3,47E-11 | 3,49E-09 | Dok1          | 0,74 | Yes |
| ENSMUSG00000068373 | -1,89E+00 | -3,1076441   | 1,42E+00 | 2,33E-01 | 5,50E-01 | D430041D05Rik | 0,27 | No  |
| ENSMUSG00000068391 | -1,36E-01 | 4,766924508  | 3,14E+00 | 7,62E-02 | 3,52E-01 | Chrac1        | 0,91 | No  |
| ENSMUSG00000068394 | 1,55E-01  | 4,737363077  | 4,03E+00 | 4,48E-02 | 2,52E-01 | Cep152        | 1,11 | No  |
| ENSMUSG00000068396 | -2,42E-01 | 7,785977214  | 1,70E+01 | 3,75E-05 | 1,06E-03 | Rpl34-ps1     | 0,85 | Yes |
| ENSMUSG00000068397 | -2,59E-01 | 5,935284346  | 1,55E+01 | 8,25E-05 | 2,06E-03 | Gm10240       | 0,84 | Yes |
| ENSMUSG00000068417 | -7,77E-02 | 5,057492793  | 1,13E+00 | 2,88E-01 | 5,84E-01 | Pnp2          | 0,95 | No  |
| ENSMUSG00000068463 | 3,18E-01  | -1,614120085 | 3,22E-01 | 5,70E-01 | 8,31E-01 | B630019A10Rik | 1,25 | No  |
| ENSMUSG00000068466 | -7,61E-02 | 4,503144189  | 8,89E-01 | 3,46E-01 | 6,47E-01 | Gm5518        | 0,95 | No  |
| ENSMUSG00000068479 | 3,60E-02  | 5,467946191  | 2,72E-01 | 6,02E-01 | 8,48E-01 | Mfap1a        | 1,03 | No  |
| ENSMUSG00000068480 | 9,00E-02  | 4,395725997  | 1,18E+00 | 2,77E-01 | 5,73E-01 | Gm7551        | 1,06 | No  |
| ENSMUSG00000068487 | -4,50E-02 | 3,719387691  | 2,26E-01 | 6,34E-01 | 8,66E-01 | Gm4943        | 0,97 | No  |
| ENSMUSG00000068522 | -1,35E+00 | -1,107420821 | 9,14E+00 | 2,50E-03 | 3,33E-02 | Aard          | 0,39 | Yes |
| ENSMUSG00000068523 | 7,86E-03  | 4,938341624  | 1,11E-02 | 9,16E-01 | 1,00E+00 | Gng5          | 1,01 | No  |
| ENSMUSG00000068536 | -1,89E+00 | -3,1076441   | 1,42E+00 | 2,33E-01 | 5,50E-01 | Doxl2         | 0,27 | No  |
| ENSMUSG00000068551 | -1,54E-01 | 4,200646875  | 3,40E+00 | 6,54E-02 | 3,21E-01 | Zfp467        | 0,90 | No  |
| ENSMUSG00000068566 | 2,69E-01  | 8,990077186  | 2,24E+01 | 2,24E-06 | 8,98E-05 | Myadm         | 1,21 | Yes |
| ENSMUSG00000068579 | -1,76E-01 | 3,548031847  | 3,22E+00 | 7,26E-02 | 3,42E-01 | Rpl7a-ps3     | 0,88 | No  |
| ENSMUSG00000068580 | 1,21E-01  | 4,439701652  | 2,22E+00 | 1,36E-01 | 4,65E-01 | Zfyve19       | 1,09 | No  |
| ENSMUSG00000068587 | -2,63E-01 | 0,489897454  | 1,29E+00 | 2,56E-01 | 5,50E-01 | Mgam          | 0,83 | No  |
| ENSMUSG00000068601 | -2,21E-02 | 3,099743998  | 3,91E-02 | 8,43E-01 | 9,85E-01 | Gm10244       | 0,98 | No  |
| ENSMUSG00000068604 | -5,00E-02 | 4,085976686  | 3,31E-01 | 5,65E-01 | 8,28E-01 | Gm8225        | 0,97 | No  |
| ENSMUSG00000068606 | 1,83E+00  | -2,96327665  | 1,33E+00 | 2,49E-01 | 5,50E-01 | Gm4841        | 3,57 | No  |
| ENSMUSG00000068629 | 1,57E-01  | -0,800833654 | 1,59E-01 | 6,90E-01 | 8,99E-01 | Gm6155        | 1,12 | No  |
| ENSMUSG00000068631 | -8,14E-01 | 6,208854092  | 1,57E+02 | 5,60E-36 | 4,94E-33 | Gm7676        | 0,57 | Yes |

|                    |           |              |          |          |          |           |      |     |
|--------------------|-----------|--------------|----------|----------|----------|-----------|------|-----|
| ENSMUSG00000068663 | -3,10E-02 | 5,752985519  | 2,13E-01 | 6,44E-01 | 8,72E-01 | Clec16a   | 0,98 | No  |
| ENSMUSG00000068674 | -2,02E-01 | 3,740057384  | 4,70E+00 | 3,02E-02 | 1,99E-01 | Gm10247   | 0,87 | No  |
| ENSMUSG00000068680 | 6,46E-01  | -2,26819634  | 6,03E-01 | 4,37E-01 | 7,30E-01 | Gm10248   | 1,56 | No  |
| ENSMUSG00000068686 | 4,64E-01  | -1,460812195 | 7,79E-01 | 3,77E-01 | 6,78E-01 | Cd59b     | 1,38 | No  |
| ENSMUSG00000068689 | -1,38E+00 | -2,896110777 | 1,20E+00 | 2,74E-01 | 5,71E-01 | Rps19-ps9 | 0,38 | No  |
| ENSMUSG00000068697 | -2,38E-01 | -0,726206108 | 3,49E-01 | 5,54E-01 | 8,20E-01 | Myoz1     | 0,85 | No  |
| ENSMUSG00000068699 | 4,47E-01  | 4,881282953  | 3,42E+01 | 4,87E-09 | 3,58E-07 | Flnc      | 1,36 | Yes |
| ENSMUSG00000068706 | -1,14E-01 | 6,898384032  | 3,51E+00 | 6,11E-02 | 3,07E-01 | Gm10250   | 0,92 | No  |
| ENSMUSG00000068732 | -5,35E-02 | 5,94614792   | 6,62E-01 | 4,16E-01 | 7,11E-01 | Tmem167b  | 0,96 | No  |
| ENSMUSG00000068735 | 7,61E-02  | 6,97339337   | 1,56E+00 | 2,11E-01 | 5,50E-01 | Trp53i11  | 1,05 | No  |
| ENSMUSG00000068739 | 2,96E-02  | 6,858746987  | 2,34E-01 | 6,29E-01 | 8,62E-01 | Sars      | 1,02 | No  |
| ENSMUSG00000068740 | 1,19E-01  | -0,175499611 | 1,28E-01 | 7,20E-01 | 9,15E-01 | Celsr2    | 1,09 | No  |
| ENSMUSG00000068742 | -4,28E-02 | 3,547119133  | 1,86E-01 | 6,66E-01 | 8,86E-01 | Cry2      | 0,97 | No  |
| ENSMUSG00000068744 | -9,56E-02 | 4,580322289  | 1,46E+00 | 2,28E-01 | 5,50E-01 | Psrc1     | 0,94 | No  |
| ENSMUSG00000068745 | -4,86E-02 | -2,896141539 | 1,09E-03 | 9,74E-01 | 1,00E+00 | Mybphl    | 0,97 | No  |
| ENSMUSG00000068747 | -1,99E-02 | 7,20812415   | 1,09E-01 | 7,41E-01 | 9,27E-01 | Sort1     | 0,99 | No  |
| ENSMUSG00000068749 | -8,09E-02 | 3,338648018  | 6,21E-01 | 4,31E-01 | 7,24E-01 | Psma5     | 0,95 | No  |
| ENSMUSG00000068758 | 9,95E-04  | 4,432382762  | 1,49E-04 | 9,90E-01 | 1,00E+00 | Il3ra     | 1,00 | No  |
| ENSMUSG00000068762 | -7,76E-02 | -2,89613075  | 4,21E-03 | 9,48E-01 | 1,00E+00 | Gstm6     | 0,95 | No  |
| ENSMUSG00000068794 | -2,66E+00 | -2,96323193  | 2,82E+00 | 9,29E-02 | 3,83E-01 | Col28a1   | 0,16 | No  |
| ENSMUSG00000068798 | 3,49E-02  | 5,785954985  | 2,71E-01 | 6,03E-01 | 8,48E-01 | Rap1a     | 1,02 | No  |
| ENSMUSG00000068823 | -6,79E-02 | 7,763130418  | 1,34E+00 | 2,47E-01 | 5,50E-01 | Csde1     | 0,95 | No  |
| ENSMUSG00000068854 | 6,02E-02  | 3,193209454  | 3,20E-01 | 5,71E-01 | 8,32E-01 | Hist2h2be | 1,04 | No  |
| ENSMUSG00000068855 | 4,68E-01  | -2,355611402 | 2,98E-01 | 5,85E-01 | 8,39E-01 | Hist2h2ac | 1,38 | No  |
| ENSMUSG00000068856 | 4,82E-02  | 5,159891606  | 4,41E-01 | 5,07E-01 | 7,91E-01 | Sf3b4     | 1,03 | No  |
| ENSMUSG00000068859 | 7,33E-02  | 1,604129608  | 1,89E-01 | 6,64E-01 | 8,84E-01 | Sp9       | 1,05 | No  |
| ENSMUSG00000068860 | -3,85E-01 | -1,006905468 | 6,73E-01 | 4,12E-01 | 7,07E-01 | Gm128     | 0,77 | No  |
| ENSMUSG00000068874 | 3,32E-01  | 3,381152287  | 1,01E+01 | 1,49E-03 | 2,22E-02 | Selenbp1  | 1,26 | Yes |
| ENSMUSG00000068876 | 1,75E+00  | -2,355712016 | 3,54E+00 | 5,98E-02 | 3,03E-01 | Cgn       | 3,37 | No  |
| ENSMUSG00000068877 | 7,06E-01  | 0,425377227  | 7,47E+00 | 6,29E-03 | 6,65E-02 | Selenbp2  | 1,63 | No  |
| ENSMUSG00000068882 | 4,91E-02  | 6,467028102  | 6,08E-01 | 4,35E-01 | 7,28E-01 | Ssb       | 1,03 | No  |
| ENSMUSG00000068890 | -8,45E-01 | -2,963241229 | 3,92E-01 | 5,31E-01 | 8,05E-01 | Lce1a2    | 0,56 | No  |



|                    |           |              |          |          |          |               |      |     |
|--------------------|-----------|--------------|----------|----------|----------|---------------|------|-----|
| ENSMUSG00000068917 | 8,20E-02  | 5,347062725  | 1,36E+00 | 2,43E-01 | 5,50E-01 | Clk2          | 1,06 | No  |
| ENSMUSG00000068921 | 7,73E-02  | 5,000137884  | 1,09E+00 | 2,96E-01 | 5,92E-01 | Dap3          | 1,06 | No  |
| ENSMUSG00000068922 | 2,95E-02  | 4,272094012  | 1,25E-01 | 7,24E-01 | 9,17E-01 | Msto1         | 1,02 | No  |
| ENSMUSG00000068923 | 2,10E-01  | 3,64039162   | 4,74E+00 | 2,95E-02 | 1,96E-01 | Syt11         | 1,16 | No  |
| ENSMUSG00000068957 | -2,41E-01 | -0,755559597 | 3,58E-01 | 5,49E-01 | 8,17E-01 | 4930589L23Rik | 0,85 | No  |
| ENSMUSG00000068959 | -1,27E-01 | 3,004249544  | 1,27E+00 | 2,61E-01 | 5,54E-01 | Zfp619        | 0,92 | No  |
| ENSMUSG00000068962 | -6,48E-02 | -1,522751357 | 1,37E-02 | 9,07E-01 | 1,00E+00 | Zfp114        | 0,96 | No  |
| ENSMUSG00000068964 | -9,27E-02 | 2,315417185  | 4,58E-01 | 4,99E-01 | 7,84E-01 | Gm6361        | 0,94 | No  |
| ENSMUSG00000068966 | -6,98E-02 | 4,442310379  | 7,66E-01 | 3,82E-01 | 6,83E-01 | Zbtb34        | 0,95 | No  |
| ENSMUSG00000068969 | -1,65E-01 | 0,866296934  | 5,76E-01 | 4,48E-01 | 7,38E-01 | Rpl32-ps      | 0,89 | No  |
| ENSMUSG00000069008 | 1,08E-01  | 8,301974006  | 3,47E+00 | 6,24E-02 | 3,11E-01 | Gm5537        | 1,08 | No  |
| ENSMUSG00000069011 | 9,31E-03  | 5,955588151  | 2,00E-02 | 8,88E-01 | 1,00E+00 | Gm10254       | 1,01 | No  |
| ENSMUSG00000069014 | 6,37E-02  | 6,664221366  | 1,05E+00 | 3,04E-01 | 6,01E-01 | Gm5641        | 1,05 | No  |
| ENSMUSG00000069020 | 5,03E-02  | 4,991791065  | 4,57E-01 | 4,99E-01 | 7,84E-01 | Urm1          | 1,04 | No  |
| ENSMUSG00000069041 | -2,00E-02 | -2,896117932 | 2,29E-04 | 9,88E-01 | 1,00E+00 | Slc25a31      | 0,99 | No  |
| ENSMUSG00000069072 | -8,86E-02 | -2,963249454 | 3,57E-03 | 9,52E-01 | 1,00E+00 | Slc7a14       | 0,94 | No  |
| ENSMUSG00000069080 | 1,81E+00  | -3,10765737  | 1,28E+00 | 2,58E-01 | 5,50E-01 | Lcn11         | 3,49 | No  |
| ENSMUSG00000069083 | 2,20E-01  | 6,141481424  | 1,15E+01 | 6,95E-04 | 1,20E-02 | Gm10259       | 1,16 | Yes |
| ENSMUSG00000069089 | 6,39E-02  | 3,895787452  | 4,99E-01 | 4,80E-01 | 7,68E-01 | Cdk7          | 1,05 | No  |
| ENSMUSG00000069094 | -1,01E-01 | 4,543783801  | 1,60E+00 | 2,06E-01 | 5,50E-01 | Pde7a         | 0,93 | No  |
| ENSMUSG00000069114 | -4,11E-01 | 2,942949437  | 1,36E+01 | 2,22E-04 | 4,72E-03 | Zbtb10        | 0,75 | Yes |
| ENSMUSG00000069117 | -2,28E-01 | 6,277234392  | 1,28E+01 | 3,51E-04 | 6,88E-03 | Gm10260       | 0,85 | Yes |
| ENSMUSG00000069125 | -4,72E-01 | -2,185687377 | 4,11E-01 | 5,21E-01 | 8,00E-01 | Rps24-ps2     | 0,72 | No  |
| ENSMUSG00000069135 | 4,29E-03  | 4,613472587  | 2,91E-03 | 9,57E-01 | 1,00E+00 | Fgfr1op       | 1,00 | No  |
| ENSMUSG00000069136 | 5,45E-01  | -1,195773491 | 1,32E+00 | 2,50E-01 | 5,50E-01 | A130006I12Rik | 1,46 | No  |
| ENSMUSG00000069170 | -5,88E-02 | -2,770553291 | 1,53E-03 | 9,69E-01 | 1,00E+00 | Adgrv1        | 0,96 | No  |
| ENSMUSG00000069171 | -2,66E+00 | -2,9632547   | 2,82E+00 | 9,28E-02 | 3,83E-01 | Nr2f1         | 0,16 | No  |
| ENSMUSG00000069184 | 3,61E-01  | 1,22493967   | 3,54E+00 | 6,00E-02 | 3,03E-01 | Zfp72         | 1,28 | No  |
| ENSMUSG00000069188 | -1,34E-01 | 5,388180091  | 3,70E+00 | 5,43E-02 | 2,85E-01 | Gm13192       | 0,91 | No  |
| ENSMUSG00000069206 | 3,83E-02  | 2,878817458  | 1,12E-01 | 7,37E-01 | 9,25E-01 | Zfp874a       | 1,03 | No  |
| ENSMUSG00000069208 | 2,62E-01  | 2,320576461  | 3,73E+00 | 5,34E-02 | 2,82E-01 | Zfp825        | 1,20 | No  |
| ENSMUSG00000069223 | 1,03E+00  | -1,322331289 | 4,07E+00 | 4,36E-02 | 2,49E-01 | 4930451E10Rik | 2,04 | No  |

|                    |           |              |          |          |          |           |      |     |
|--------------------|-----------|--------------|----------|----------|----------|-----------|------|-----|
| ENSMUSG00000069236 | -5,74E-01 | -1,683232227 | 9,11E-01 | 3,40E-01 | 6,41E-01 | Gm7251    | 0,67 | No  |
| ENSMUSG00000069237 | 5,64E-02  | 4,540507098  | 4,96E-01 | 4,81E-01 | 7,69E-01 | Fam8a1    | 1,04 | No  |
| ENSMUSG00000069248 | -1,95E+00 | -3,033628749 | 1,50E+00 | 2,21E-01 | 5,50E-01 | Serpinb6e | 0,26 | No  |
| ENSMUSG00000069255 | 1,77E-01  | 5,12710322   | 5,96E+00 | 1,47E-02 | 1,24E-01 | Dusp22    | 1,13 | No  |
| ENSMUSG00000069265 | -2,20E-01 | -1,126803979 | 2,25E-01 | 6,35E-01 | 8,67E-01 | Hist1h3a  | 0,86 | No  |
| ENSMUSG00000069266 | 4,85E-01  | -2,318647281 | 3,54E-01 | 5,52E-01 | 8,18E-01 | Hist1h4b  | 1,40 | No  |
| ENSMUSG00000069267 | 8,05E-01  | -1,49762964  | 1,81E+00 | 1,79E-01 | 5,40E-01 | Hist1h3b  | 1,75 | No  |
| ENSMUSG00000069268 | -1,34E-01 | 0,511845113  | 3,00E-01 | 5,84E-01 | 8,38E-01 | Hist1h2bf | 0,91 | No  |
| ENSMUSG00000069270 | 2,05E-01  | 0,443845754  | 6,53E-01 | 4,19E-01 | 7,14E-01 | Hist1h2ac | 1,15 | No  |
| ENSMUSG00000069272 | 2,69E-01  | -0,355480053 | 5,99E-01 | 4,39E-01 | 7,32E-01 | Hist1h2ae | 1,20 | No  |
| ENSMUSG00000069273 | -3,60E-01 | -1,205840439 | 6,65E-01 | 4,15E-01 | 7,10E-01 | Hist1h3e  | 0,78 | No  |
| ENSMUSG00000069274 | -1,35E+00 | -2,770624777 | 1,13E+00 | 2,87E-01 | 5,83E-01 | Hist1h4f  | 0,39 | No  |
| ENSMUSG00000069300 | 1,91E-02  | 1,21815769   | 9,52E-03 | 9,22E-01 | 1,00E+00 | Hist1h2bj | 1,01 | No  |
| ENSMUSG00000069301 | -6,71E-01 | -1,262635013 | 2,03E+00 | 1,54E-01 | 4,98E-01 | Hist1h2ag | 0,63 | No  |
| ENSMUSG00000069302 | 1,63E+00  | -1,879964881 | 5,79E+00 | 1,62E-02 | 1,32E-01 | Hist1h2ah | 3,10 | No  |
| ENSMUSG00000069303 | -5,41E-01 | 1,887642061  | 1,22E+01 | 4,77E-04 | 8,83E-03 | Hist1h2br | 0,69 | Yes |
| ENSMUSG00000069305 | -5,63E-01 | -0,574004014 | 2,61E+00 | 1,06E-01 | 3,98E-01 | Hist1h4n  | 0,68 | No  |
| ENSMUSG00000069306 | -4,09E-03 | -1,070138684 | 7,98E-05 | 9,93E-01 | 1,00E+00 | Hist1h4m  | 1,00 | No  |
| ENSMUSG00000069307 | -1,39E-01 | 1,842603405  | 7,99E-01 | 3,71E-01 | 6,73E-01 | Hist1h2bq | 0,91 | No  |
| ENSMUSG00000069308 | 1,39E-01  | 0,116236392  | 2,40E-01 | 6,24E-01 | 8,59E-01 | Hist1h2bp | 1,10 | No  |
| ENSMUSG00000069309 | 1,02E+00  | -2,165776942 | 1,85E+00 | 1,74E-01 | 5,31E-01 | Hist1h2an | 2,02 | No  |
| ENSMUSG00000069310 | -1,97E-01 | -0,413246447 | 3,28E-01 | 5,67E-01 | 8,29E-01 | Hist1h3c  | 0,87 | No  |
| ENSMUSG00000069376 | 6,00E-02  | 2,57771778   | 2,17E-01 | 6,42E-01 | 8,71E-01 | Gm5507    | 1,04 | No  |
| ENSMUSG00000069378 | 1,81E+00  | -3,10765737  | 1,28E+00 | 2,58E-01 | 5,50E-01 | Prdm6     | 3,49 | No  |
| ENSMUSG00000069379 | 3,93E-02  | 4,730499596  | 2,57E-01 | 6,12E-01 | 8,52E-01 | Gm4950    | 1,03 | No  |
| ENSMUSG00000069439 | -7,38E-02 | -3,033659033 | 2,66E-03 | 9,59E-01 | 1,00E+00 | Gm8444    | 0,95 | No  |
| ENSMUSG00000069456 | -1,23E+00 | -3,146117124 | 7,12E-01 | 3,99E-01 | 6,98E-01 | Rdh16     | 0,42 | No  |
| ENSMUSG00000069475 | 2,40E-01  | -2,35560678  | 7,23E-02 | 7,88E-01 | 9,53E-01 | Gm6020    | 1,18 | No  |
| ENSMUSG00000069495 | 1,47E-01  | 5,116409778  | 4,05E+00 | 4,42E-02 | 2,50E-01 | Epc2      | 1,11 | No  |
| ENSMUSG00000069515 | 6,80E-02  | 3,654887257  | 4,95E-01 | 4,82E-01 | 7,69E-01 | Lyz1      | 1,05 | No  |
| ENSMUSG00000069516 | 1,80E-02  | 14,02226704  | 1,05E-01 | 7,46E-01 | 9,30E-01 | Lyz2      | 1,01 | No  |
| ENSMUSG00000069518 | -1,86E+00 | -2,963227946 | 1,40E+00 | 2,36E-01 | 5,50E-01 | Gm10271   | 0,28 | No  |

|                    |           |              |           |          |          |               |      |     |
|--------------------|-----------|--------------|-----------|----------|----------|---------------|------|-----|
| ENSMUSG00000069520 | -8,97E-02 | 5,964725381  | 1,88E+00  | 1,71E-01 | 5,26E-01 | Tmem19        | 0,94 | No  |
| ENSMUSG00000069539 | -7,85E-02 | 6,416596664  | 1,56E+00  | 2,12E-01 | 5,50E-01 | Scyl2         | 0,95 | No  |
| ENSMUSG00000069540 | -1,03E-02 | -1,600678674 | 3,25E-04  | 9,86E-01 | 1,00E+00 | Gm4925        | 0,99 | No  |
| ENSMUSG00000069554 | 3,14E-02  | -3,107617333 | -7,69E-10 | 1,00E+00 | 1,00E+00 | I830134H01Rik | 1,02 | No  |
| ENSMUSG00000069565 | 3,42E-02  | 6,332934588  | 2,91E-01  | 5,90E-01 | 8,41E-01 | Dazap1        | 1,02 | No  |
| ENSMUSG00000069581 | -1,89E+00 | -3,1076441   | 1,42E+00  | 2,33E-01 | 5,50E-01 | Tspear        | 0,27 | No  |
| ENSMUSG00000069588 | -2,68E+00 | -3,033645766 | 2,84E+00  | 9,17E-02 | 3,82E-01 | Gm11733       | 0,16 | No  |
| ENSMUSG00000069601 | -1,77E+00 | -2,655122034 | 2,18E+00  | 1,40E-01 | 4,72E-01 | Ank3          | 0,29 | No  |
| ENSMUSG00000069607 | 7,60E-01  | 2,23727868   | 2,66E+01  | 2,47E-07 | 1,27E-05 | Cd300ld3      | 1,69 | Yes |
| ENSMUSG00000069609 | 7,44E-01  | 1,240266645  | 1,45E+01  | 1,40E-04 | 3,21E-03 | Cd300ld4      | 1,68 | Yes |
| ENSMUSG00000069622 | 1,85E-02  | 4,901643634  | 6,04E-02  | 8,06E-01 | 9,63E-01 | Gm10273       | 1,01 | No  |
| ENSMUSG00000069631 | 1,88E-02  | 4,946504884  | 6,40E-02  | 8,00E-01 | 9,61E-01 | Strada        | 1,01 | No  |
| ENSMUSG00000069633 | -3,60E-02 | 2,000013391  | 5,81E-02  | 8,10E-01 | 9,65E-01 | Pex11g        | 0,98 | No  |
| ENSMUSG00000069662 | -1,77E-01 | 8,409251047  | 9,54E+00  | 2,01E-03 | 2,82E-02 | Marcks        | 0,88 | Yes |
| ENSMUSG00000069670 | -2,71E+00 | -3,033620915 | 2,92E+00  | 8,75E-02 | 3,78E-01 | Nkain2        | 0,15 | No  |
| ENSMUSG00000069678 | -3,01E-01 | 2,119559778  | 4,22E+00  | 4,00E-02 | 2,38E-01 | Pcgf1         | 0,81 | No  |
| ENSMUSG00000069682 | -1,09E-01 | 8,776957283  | 3,68E+00  | 5,52E-02 | 2,88E-01 | Gm10275       | 0,93 | No  |
| ENSMUSG00000069712 | -1,90E+00 | -3,033647263 | 1,44E+00  | 2,30E-01 | 5,50E-01 | 4930444G20Rik | 0,27 | No  |
| ENSMUSG00000069713 | 4,01E-01  | -1,247144278 | 4,81E-01  | 4,88E-01 | 7,75E-01 | 4933406P04Rik | 1,32 | No  |
| ENSMUSG00000069727 | 5,56E-02  | 1,569024704  | 1,10E-01  | 7,40E-01 | 9,26E-01 | Zfp975        | 1,04 | No  |
| ENSMUSG00000069729 | -1,25E-01 | 6,520306604  | 3,98E+00  | 4,61E-02 | 2,57E-01 | Arid1b        | 0,92 | No  |
| ENSMUSG00000069743 | 8,40E-02  | -0,436824797 | 6,61E-02  | 7,97E-01 | 9,58E-01 | Zfp820        | 1,06 | No  |
| ENSMUSG00000069744 | -1,31E-01 | 4,445846535  | 2,61E+00  | 1,06E-01 | 3,99E-01 | Psmb3         | 0,91 | No  |
| ENSMUSG00000069755 | -9,29E-02 | 2,457290358  | 5,15E-01  | 4,73E-01 | 7,61E-01 | Zfp125        | 0,94 | No  |
| ENSMUSG00000069763 | -1,89E+00 | -3,033648118 | 1,42E+00  | 2,33E-01 | 5,50E-01 | Tmem100       | 0,27 | No  |
| ENSMUSG00000069769 | -4,68E-01 | 2,473603951  | 1,34E+01  | 2,55E-04 | 5,31E-03 | Msi2          | 0,72 | Yes |
| ENSMUSG00000069792 | 2,03E-02  | 9,564908452  | 1,29E-01  | 7,19E-01 | 9,15E-01 | Wfdc17        | 1,01 | No  |
| ENSMUSG00000069793 | 2,19E-01  | 5,622432027  | 1,04E+01  | 1,27E-03 | 1,96E-02 | Slfn9         | 1,16 | Yes |
| ENSMUSG00000069804 | -1,03E+00 | -1,472818242 | 3,40E+00  | 6,52E-02 | 3,20E-01 | Gm10277       | 0,49 | No  |
| ENSMUSG00000069805 | 1,21E+00  | -1,44883177  | 4,64E+00  | 3,13E-02 | 2,05E-01 | Fbp1          | 2,31 | No  |
| ENSMUSG00000069806 | -2,34E+00 | -1,682954528 | 1,03E+01  | 1,32E-03 | 2,03E-02 | Cacng7        | 0,20 | Yes |
| ENSMUSG00000069808 | 8,56E-02  | 3,919226472  | 9,13E-01  | 3,39E-01 | 6,40E-01 | Fam57a        | 1,06 | No  |

|                    |           |              |          |          |          |                |      |     |
|--------------------|-----------|--------------|----------|----------|----------|----------------|------|-----|
| ENSMUSG00000069814 | 6,45E-01  | -1,165869271 | 1,60E+00 | 2,05E-01 | 5,50E-01 | Ccdc92b        | 1,56 | No  |
| ENSMUSG00000069830 | 3,08E-01  | 4,590306718  | 1,51E+01 | 1,01E-04 | 2,44E-03 | Nlrp1a         | 1,24 | Yes |
| ENSMUSG00000069833 | 3,02E-01  | 10,3520173   | 2,90E+01 | 7,08E-08 | 4,08E-06 | Ahnak          | 1,23 | Yes |
| ENSMUSG00000069835 | 1,12E-01  | -0,070287597 | 1,37E-01 | 7,12E-01 | 9,11E-01 | Sat2           | 1,08 | No  |
| ENSMUSG00000069844 | -2,42E-02 | 4,000997031  | 7,30E-02 | 7,87E-01 | 9,53E-01 | Sco1           | 0,98 | No  |
| ENSMUSG00000069855 | 3,13E+00  | -2,832064034 | 4,00E+00 | 4,55E-02 | 2,54E-01 | Slc47a2        | 8,77 | No  |
| ENSMUSG00000069862 | -1,55E-01 | 6,156388001  | 5,80E+00 | 1,60E-02 | 1,31E-01 | Rps12-ps9      | 0,90 | No  |
| ENSMUSG00000069867 | 8,41E-01  | -2,401437283 | 8,51E-01 | 3,56E-01 | 6,58E-01 | Pabpn1l        | 1,79 | No  |
| ENSMUSG00000069873 | -6,51E-01 | -0,535278462 | 3,48E+00 | 6,22E-02 | 3,10E-01 | 4930438A08Rik  | 0,64 | No  |
| ENSMUSG00000069874 | 6,48E-02  | 3,933609689  | 5,43E-01 | 4,61E-01 | 7,50E-01 | Irgm2          | 1,05 | No  |
| ENSMUSG00000069890 | -1,89E+00 | -3,1076441   | 1,42E+00 | 2,33E-01 | 5,50E-01 | 1700024J04Rik  | 0,27 | No  |
| ENSMUSG00000069892 | 3,76E-01  | 5,737520732  | 3,16E+01 | 1,87E-08 | 1,22E-06 | 9930111J21Rik2 | 1,30 | Yes |
| ENSMUSG00000069893 | 3,58E-01  | 5,084909194  | 2,46E+01 | 7,17E-07 | 3,31E-05 | 9930111J21Rik1 | 1,28 | Yes |
| ENSMUSG00000069895 | 3,74E-02  | 6,439055593  | 3,51E-01 | 5,54E-01 | 8,19E-01 | Atxn1l         | 1,03 | No  |
| ENSMUSG00000069899 | -2,99E-02 | 5,273868402  | 1,75E-01 | 6,76E-01 | 8,91E-01 | Gm12166        | 0,98 | No  |
| ENSMUSG00000069910 | 1,19E-01  | 4,395005005  | 2,12E+00 | 1,45E-01 | 4,82E-01 | Spdl1          | 1,09 | No  |
| ENSMUSG00000069911 | -1,35E+00 | -0,682973486 | 1,05E+01 | 1,22E-03 | 1,90E-02 | Fam196b        | 0,39 | Yes |
| ENSMUSG00000069913 | 1,55E-01  | 3,738998087  | 2,74E+00 | 9,76E-02 | 3,90E-01 | Anp32-ps       | 1,11 | No  |
| ENSMUSG00000069917 | -1,73E+00 | -2,600609768 | 2,09E+00 | 1,48E-01 | 4,88E-01 | Hba-a2         | 0,30 | No  |
| ENSMUSG00000069919 | -4,10E-02 | -2,497611554 | 1,57E-03 | 9,68E-01 | 1,00E+00 | Hba-a1         | 0,97 | No  |
| ENSMUSG00000069920 | 2,06E-01  | 1,200769428  | 1,18E+00 | 2,76E-01 | 5,73E-01 | B3gnt9         | 1,15 | No  |
| ENSMUSG00000069925 | -7,98E-01 | -2,963241606 | 3,44E-01 | 5,57E-01 | 8,21E-01 | 4932416K20Rik  | 0,58 | No  |
| ENSMUSG00000069939 | 1,05E-01  | 7,327919932  | 3,11E+00 | 7,76E-02 | 3,56E-01 | Gm12070        | 1,08 | No  |
| ENSMUSG00000069962 | 5,34E-01  | -0,980521428 | 1,30E+00 | 2,54E-01 | 5,50E-01 | Gm5356         | 1,45 | No  |
| ENSMUSG00000069972 | -1,52E-01 | 7,438082361  | 6,54E+00 | 1,05E-02 | 9,70E-02 | Rps13-ps2      | 0,90 | No  |
| ENSMUSG00000069986 | -4,34E-02 | 1,755884819  | 7,50E-02 | 7,84E-01 | 9,51E-01 | Gm8054         | 0,97 | No  |
| ENSMUSG00000069996 | 7,20E-01  | -2,963285673 | 2,81E-01 | 5,96E-01 | 8,44E-01 | Gm7125         | 1,65 | No  |
| ENSMUSG00000070000 | 8,74E-02  | 5,296928801  | 1,51E+00 | 2,19E-01 | 5,50E-01 | Fcho1          | 1,06 | No  |
| ENSMUSG00000070002 | -1,03E-01 | 5,333902521  | 2,11E+00 | 1,46E-01 | 4,84E-01 | Ell            | 0,93 | No  |
| ENSMUSG00000070003 | 1,55E-01  | 5,531369642  | 5,01E+00 | 2,52E-02 | 1,76E-01 | Ssbp4          | 1,11 | No  |
| ENSMUSG00000070025 | 1,36E-01  | 5,240753664  | 3,60E+00 | 5,78E-02 | 2,97E-01 | Gm10284        | 1,10 | No  |
| ENSMUSG00000070031 | -2,97E-01 | 5,224677149  | 1,73E+01 | 3,15E-05 | 9,14E-04 | Sp140          | 0,81 | Yes |

|                    |           |              |           |          |          |               |      |     |
|--------------------|-----------|--------------|-----------|----------|----------|---------------|------|-----|
| ENSMUSG00000070034 | -2,08E-01 | 5,172184388  | 8,39E+00  | 3,77E-03 | 4,53E-02 | Sp110         | 0,87 | Yes |
| ENSMUSG00000070044 | 4,63E-01  | 3,229683653  | 1,81E+01  | 2,14E-05 | 6,62E-04 | Fam149a       | 1,38 | Yes |
| ENSMUSG00000070047 | -4,51E-01 | 1,075154622  | 5,44E+00  | 1,96E-02 | 1,49E-01 | Fat1          | 0,73 | No  |
| ENSMUSG00000070056 | -5,86E-02 | 6,522143987  | 8,76E-01  | 3,49E-01 | 6,51E-01 | Mfhas1        | 0,96 | No  |
| ENSMUSG00000070063 | -7,84E-03 | -1,543875005 | 2,04E-04  | 9,89E-01 | 1,00E+00 | Snora33       | 0,99 | No  |
| ENSMUSG00000070065 | 2,06E-02  | -3,146103739 | -9,26E-10 | 1,00E+00 | 1,00E+00 | Mir451a       | 1,01 | No  |
| ENSMUSG00000070074 | 1,87E+00  | -3,107639691 | 1,38E+00  | 2,40E-01 | 5,50E-01 | Mir484        | 3,67 | No  |
| ENSMUSG00000070077 | -1,87E+00 | -3,03364178  | 1,41E+00  | 2,36E-01 | 5,50E-01 | Mir491        | 0,27 | No  |
| ENSMUSG00000070127 | -7,00E-02 | -2,600667548 | 3,27E-03  | 9,54E-01 | 1,00E+00 | Mir146b       | 0,95 | No  |
| ENSMUSG00000070130 | 1,43E-01  | -2,68311995  | 1,97E-02  | 8,88E-01 | 1,00E+00 | Mir328        | 1,10 | No  |
| ENSMUSG00000070166 | -6,30E-01 | -2,268049019 | 7,73E-01  | 3,79E-01 | 6,80E-01 | Gm25821       | 0,65 | No  |
| ENSMUSG00000070167 | -5,78E-01 | -2,226276809 | 5,92E-01  | 4,42E-01 | 7,34E-01 | Snora57       | 0,67 | No  |
| ENSMUSG00000070209 | -1,89E+00 | -3,1076441   | 1,42E+00  | 2,33E-01 | 5,50E-01 | n-R5s27       | 0,27 | No  |
| ENSMUSG00000070214 | 1,81E+00  | -3,10765737  | 1,28E+00  | 2,58E-01 | 5,50E-01 | Gm23058       | 3,49 | No  |
| ENSMUSG00000070225 | -2,66E+00 | -2,896116003 | 2,81E+00  | 9,35E-02 | 3,83E-01 | n-R5s33       | 0,16 | No  |
| ENSMUSG00000070249 | 9,01E-03  | -3,107646452 | -5,16E-10 | 1,00E+00 | 1,00E+00 | Gm23520       | 1,01 | No  |
| ENSMUSG00000070271 | -4,09E-01 | 3,011404501  | 1,27E+01  | 3,65E-04 | 7,08E-03 | Gm13268       | 0,75 | Yes |
| ENSMUSG00000070280 | -1,94E+00 | -3,107619243 | 1,50E+00  | 2,21E-01 | 5,50E-01 | Slc22a14      | 0,26 | No  |
| ENSMUSG00000070282 | 4,46E-01  | 0,119899031  | 2,55E+00  | 1,10E-01 | 4,06E-01 | 3000002C10Rik | 1,36 | No  |
| ENSMUSG00000070283 | -9,93E-02 | 3,388177898  | 9,22E-01  | 3,37E-01 | 6,38E-01 | Ndufaf3       | 0,93 | No  |
| ENSMUSG00000070284 | 1,60E-01  | 4,64256233   | 4,16E+00  | 4,14E-02 | 2,42E-01 | Gmppb         | 1,12 | No  |
| ENSMUSG00000070287 | -6,60E-01 | -0,912481106 | 2,25E+00  | 1,34E-01 | 4,60E-01 | Slc35g2       | 0,63 | No  |
| ENSMUSG00000070291 | -2,49E-02 | -1,247141665 | 3,01E-03  | 9,56E-01 | 1,00E+00 | Ddx43         | 0,98 | No  |
| ENSMUSG00000070298 | -5,13E-01 | -1,289611525 | 8,52E-01  | 3,56E-01 | 6,57E-01 | Trcg1         | 0,70 | No  |
| ENSMUSG00000070304 | -1,01E+00 | 2,810565049  | 7,89E+01  | 6,54E-19 | 1,38E-16 | Scn2b         | 0,49 | Yes |
| ENSMUSG00000070305 | -2,45E-01 | 4,892305175  | 1,07E+01  | 1,05E-03 | 1,69E-02 | Mpzl3         | 0,84 | Yes |
| ENSMUSG00000070306 | -2,73E-02 | -2,963256629 | 3,40E-04  | 9,85E-01 | 1,00E+00 | Ccdc153       | 0,98 | No  |
| ENSMUSG00000070315 | -1,95E-01 | 2,887269794  | 2,98E+00  | 8,42E-02 | 3,72E-01 | 4930581F22Rik | 0,87 | No  |
| ENSMUSG00000070319 | -9,76E-02 | 5,44148172   | 1,96E+00  | 1,62E-01 | 5,11E-01 | Eif3g         | 0,93 | No  |
| ENSMUSG00000070323 | -2,72E-02 | 0,378887087  | 1,07E-02  | 9,18E-01 | 1,00E+00 | Mmp27         | 0,98 | No  |
| ENSMUSG00000070327 | -4,11E-04 | 8,057611619  | 5,01E-05  | 9,94E-01 | 1,00E+00 | Rnf213        | 1,00 | No  |
| ENSMUSG00000070330 | -8,52E-02 | -2,311172974 | 6,47E-03  | 9,36E-01 | 1,00E+00 | Tmem235       | 0,94 | No  |

|                    |           |              |           |          |          |               |      |     |
|--------------------|-----------|--------------|-----------|----------|----------|---------------|------|-----|
| ENSMUSG00000070331 | -8,60E-02 | -2,448724417 | 8,47E-03  | 9,27E-01 | 1,00E+00 | Qrich2        | 0,94 | No  |
| ENSMUSG00000070332 | -1,94E+00 | -3,107619243 | 1,50E+00  | 2,21E-01 | 5,50E-01 | Trim80        | 0,26 | No  |
| ENSMUSG00000070336 | -7,33E-02 | -0,641435352 | 4,12E-02  | 8,39E-01 | 9,83E-01 | Fbxo47        | 0,95 | No  |
| ENSMUSG00000070337 | -2,50E-01 | 0,087553374  | 7,03E-01  | 4,02E-01 | 7,00E-01 | Gpr179        | 0,84 | No  |
| ENSMUSG00000070342 | 1,23E+00  | -2,83200776  | 9,30E-01  | 3,35E-01 | 6,36E-01 | Gm10287       | 2,34 | No  |
| ENSMUSG00000070343 | -1,67E-01 | 8,711766124  | 8,53E+00  | 3,49E-03 | 4,28E-02 | Gm10288       | 0,89 | Yes |
| ENSMUSG00000070345 | 2,98E-01  | -0,355600439 | 7,47E-01  | 3,87E-01 | 6,87E-01 | Hsf5          | 1,23 | No  |
| ENSMUSG00000070348 | 3,35E-01  | 6,916759664  | 2,99E+01  | 4,59E-08 | 2,78E-06 | Ccnd1         | 1,26 | Yes |
| ENSMUSG00000070354 | 1,15E-01  | 6,831573132  | 3,51E+00  | 6,12E-02 | 3,07E-01 | Evi2          | 1,08 | No  |
| ENSMUSG00000070368 | 1,21E+00  | -2,896186976 | 9,04E-01  | 3,42E-01 | 6,42E-01 | Prok1         | 2,31 | No  |
| ENSMUSG00000070369 | 1,96E-01  | 5,771128694  | 8,52E+00  | 3,52E-03 | 4,31E-02 | Itgad         | 1,15 | Yes |
| ENSMUSG00000070371 | 1,47E-02  | 0,432193141  | 3,71E-03  | 9,51E-01 | 1,00E+00 | Prss36        | 1,01 | No  |
| ENSMUSG00000070372 | 2,94E-02  | 7,830965135  | 2,53E-01  | 6,15E-01 | 8,54E-01 | Capza1        | 1,02 | No  |
| ENSMUSG00000070385 | -1,49E+00 | -0,573961916 | 1,59E+01  | 6,61E-05 | 1,72E-03 | Ampd1         | 0,36 | Yes |
| ENSMUSG00000070388 | -1,59E-02 | -2,96323932  | 1,18E-04  | 9,91E-01 | 1,00E+00 | Fbxo39        | 0,99 | No  |
| ENSMUSG00000070390 | 3,60E-01  | 5,170678509  | 2,44E+01  | 7,68E-07 | 3,53E-05 | Nlrp1b        | 1,28 | Yes |
| ENSMUSG00000070392 | 1,76E-01  | 2,15979741   | 1,48E+00  | 2,24E-01 | 5,50E-01 | Gm20634       | 1,13 | No  |
| ENSMUSG00000070394 | -1,76E-02 | 5,012328396  | 5,65E-02  | 8,12E-01 | 9,67E-01 | Tmem256       | 0,99 | No  |
| ENSMUSG00000070407 | 2,22E-01  | 6,73590478   | 1,27E+01  | 3,65E-04 | 7,08E-03 | Hs3st3b1      | 1,17 | Yes |
| ENSMUSG00000070420 | 2,06E-02  | 3,898405065  | 5,11E-02  | 8,21E-01 | 9,72E-01 | Zscan25       | 1,01 | No  |
| ENSMUSG00000070421 | 7,67E-01  | -2,963261668 | 3,24E-01  | 5,69E-01 | 8,30E-01 | Olfir658      | 1,70 | No  |
| ENSMUSG00000070424 | -1,48E+00 | -2,548199946 | 2,26E+00  | 1,33E-01 | 4,58E-01 | Art5          | 0,36 | No  |
| ENSMUSG00000070425 | -3,52E-02 | 2,744550535  | 8,91E-02  | 7,65E-01 | 9,40E-01 | Xntrpc        | 0,98 | No  |
| ENSMUSG00000070426 | 2,34E-02  | 4,370323909  | 8,09E-02  | 7,76E-01 | 9,46E-01 | Rnf121        | 1,02 | No  |
| ENSMUSG00000070427 | -1,20E-02 | 3,158932277  | 1,25E-02  | 9,11E-01 | 1,00E+00 | Il18bp        | 0,99 | No  |
| ENSMUSG00000070436 | -9,29E-01 | -0,83163301  | 5,12E+00  | 2,37E-02 | 1,69E-01 | Serpinh1      | 0,53 | No  |
| ENSMUSG00000070443 | 1,46E-01  | 3,791589823  | 2,50E+00  | 1,14E-01 | 4,16E-01 | Gm10291       | 1,11 | No  |
| ENSMUSG00000070461 | -1,42E-02 | 3,044723491  | 1,63E-02  | 8,98E-01 | 1,00E+00 | 9230112E08Rik | 0,99 | No  |
| ENSMUSG00000070462 | 1,86E-01  | 6,644096313  | 8,94E+00  | 2,80E-03 | 3,63E-02 | Tlnrd1        | 1,14 | Yes |
| ENSMUSG00000070469 | 9,01E-03  | -3,107646452 | -5,16E-10 | 1,00E+00 | 1,00E+00 | Adamts13      | 1,01 | No  |
| ENSMUSG00000070471 | -1,02E+00 | -1,62751781  | 2,30E+00  | 1,30E-01 | 4,52E-01 | Erich6        | 0,49 | No  |
| ENSMUSG00000070476 | 2,37E-01  | 5,322415795  | 1,11E+01  | 8,43E-04 | 1,40E-02 | Fam217b       | 1,18 | Yes |

|                    |           |              |          |          |          |             |      |     |
|--------------------|-----------|--------------|----------|----------|----------|-------------|------|-----|
| ENSMUSG00000070490 | 1,41E-01  | 4,576596007  | 3,16E+00 | 7,55E-02 | 3,50E-01 | Gm10293     | 1,10 | No  |
| ENSMUSG00000070493 | -6,27E-02 | 5,786002073  | 8,83E-01 | 3,47E-01 | 6,48E-01 | Chchd2      | 0,96 | No  |
| ENSMUSG00000070495 | -5,88E-02 | -3,033616507 | 1,62E-03 | 9,68E-01 | 1,00E+00 | Ctcf1       | 0,96 | No  |
| ENSMUSG00000070498 | -2,70E+00 | -2,96323619  | 2,89E+00 | 8,89E-02 | 3,79E-01 | Tmem132b    | 0,15 | No  |
| ENSMUSG00000070501 | -2,56E-01 | 2,041179072  | 3,13E+00 | 7,67E-02 | 3,53E-01 | lfi214      | 0,84 | No  |
| ENSMUSG00000070504 | -6,57E-02 | -2,655178995 | 3,94E-03 | 9,50E-01 | 1,00E+00 | Fcrl6       | 0,96 | No  |
| ENSMUSG00000070509 | -1,87E+00 | -3,107637761 | 1,39E+00 | 2,38E-01 | 5,50E-01 | Rgma        | 0,27 | No  |
| ENSMUSG00000070520 | -1,15E-01 | 4,324020686  | 1,93E+00 | 1,64E-01 | 5,16E-01 | Nsmce3      | 0,92 | No  |
| ENSMUSG00000070522 | 3,67E-01  | 1,019199767  | 3,14E+00 | 7,63E-02 | 3,52E-01 | Gm6505      | 1,29 | No  |
| ENSMUSG00000070524 | 4,60E-01  | 3,61508213   | 2,22E+01 | 2,48E-06 | 9,76E-05 | Fcrlb       | 1,38 | Yes |
| ENSMUSG00000070526 | 6,01E-01  | -0,847730971 | 2,01E+00 | 1,56E-01 | 5,01E-01 | Peg12       | 1,52 | No  |
| ENSMUSG00000070527 | -2,61E-01 | -2,146174912 | 1,34E-01 | 7,14E-01 | 9,12E-01 | Mkrn3       | 0,83 | No  |
| ENSMUSG00000070544 | -1,25E-01 | 6,880939603  | 4,20E+00 | 4,04E-02 | 2,38E-01 | Top1        | 0,92 | No  |
| ENSMUSG00000070547 | 1,81E+00  | -3,10765737  | 1,28E+00 | 2,58E-01 | 5,50E-01 | Mrgprb1     | 3,49 | No  |
| ENSMUSG00000070563 | -5,45E-02 | -2,832009003 | 1,34E-03 | 9,71E-01 | 1,00E+00 | Spaca4      | 0,96 | No  |
| ENSMUSG00000070564 | -1,25E+00 | -2,333205398 | 1,49E+00 | 2,22E-01 | 5,50E-01 | Ntn5        | 0,42 | No  |
| ENSMUSG00000070565 | -9,52E-02 | 4,496540658  | 1,40E+00 | 2,36E-01 | 5,50E-01 | Rasal2      | 0,94 | No  |
| ENSMUSG00000070568 | -8,50E-02 | -2,548242778 | 6,54E-03 | 9,36E-01 | 1,00E+00 | Slc6a21     | 0,94 | No  |
| ENSMUSG00000070570 | -9,20E-02 | -1,77057307  | 1,97E-02 | 8,88E-01 | 1,00E+00 | Slc17a7     | 0,94 | No  |
| ENSMUSG00000070572 | -2,64E-02 | 4,184972443  | 9,69E-02 | 7,56E-01 | 9,34E-01 | Trmt112-ps2 | 0,98 | No  |
| ENSMUSG00000070576 | 2,37E+00  | -1,801085262 | 1,10E+01 | 9,14E-04 | 1,50E-02 | Mn1         | 5,17 | Yes |
| ENSMUSG00000070583 | -7,20E-02 | 0,875762678  | 1,21E-01 | 7,28E-01 | 9,20E-01 | Fv1         | 0,95 | No  |
| ENSMUSG00000070594 | -5,51E-02 | -2,998031084 | 1,38E-03 | 9,70E-01 | 1,00E+00 | Gm4788      | 0,96 | No  |
| ENSMUSG00000070601 | 1,35E+00  | -2,401411377 | 1,86E+00 | 1,73E-01 | 5,30E-01 | Vmn2r84     | 2,54 | No  |
| ENSMUSG00000070604 | 2,33E-01  | 2,227116284  | 2,69E+00 | 1,01E-01 | 3,92E-01 | Vsig10l     | 1,18 | No  |
| ENSMUSG00000070605 | 7,40E-02  | 5,632323806  | 1,18E+00 | 2,77E-01 | 5,73E-01 | Zfp992      | 1,05 | No  |
| ENSMUSG00000070606 | 8,42E-01  | -2,711677848 | 6,18E-01 | 4,32E-01 | 7,25E-01 | Gm10298     | 1,79 | No  |
| ENSMUSG00000070610 | 9,59E-03  | 5,216255388  | 1,78E-02 | 8,94E-01 | 1,00E+00 | Gm13127     | 1,01 | No  |
| ENSMUSG00000070637 | -1,14E-02 | -3,033635021 | 1,50E-05 | 9,97E-01 | 1,00E+00 | Gm694       | 0,99 | No  |
| ENSMUSG00000070639 | 1,04E-01  | 5,874568542  | 2,42E+00 | 1,20E-01 | 4,30E-01 | Lrrc8b      | 1,07 | No  |
| ENSMUSG00000070643 | 8,96E-01  | -1,963178469 | 1,77E+00 | 1,83E-01 | 5,46E-01 | Sox13       | 1,86 | No  |
| ENSMUSG00000070644 | -4,28E-01 | -2,448604448 | 1,87E-01 | 6,65E-01 | 8,85E-01 | Etnk2       | 0,74 | No  |

|                    |           |              |          |          |          |               |      |     |
|--------------------|-----------|--------------|----------|----------|----------|---------------|------|-----|
| ENSMUSG00000070645 | -3,19E+00 | -2,963221167 | 4,28E+00 | 3,87E-02 | 2,33E-01 | Ren1          | 0,11 | No  |
| ENSMUSG00000070661 | -3,51E-01 | -1,963178054 | 2,86E-01 | 5,93E-01 | 8,42E-01 | Rnf186        | 0,78 | No  |
| ENSMUSG00000070667 | -4,23E-01 | -0,460559109 | 1,41E+00 | 2,36E-01 | 5,50E-01 | Rpl31-ps10    | 0,75 | No  |
| ENSMUSG00000070683 | 1,24E+00  | -2,770564607 | 9,59E-01 | 3,28E-01 | 6,28E-01 | Lactbl1       | 2,37 | No  |
| ENSMUSG00000070690 | 1,50E-01  | -1,627598021 | 6,83E-02 | 7,94E-01 | 9,56E-01 | 5830473C10Rik | 1,11 | No  |
| ENSMUSG00000070691 | -1,68E-01 | 6,688526369  | 7,39E+00 | 6,56E-03 | 6,85E-02 | Runx3         | 0,89 | No  |
| ENSMUSG00000070692 | -2,42E-01 | 0,900089984  | 1,28E+00 | 2,57E-01 | 5,50E-01 | Rps12-ps10    | 0,85 | No  |
| ENSMUSG00000070697 | -7,08E-02 | 5,739907616  | 1,11E+00 | 2,92E-01 | 5,88E-01 | Utp3          | 0,95 | No  |
| ENSMUSG00000070699 | 1,33E-01  | 2,854242944  | 1,22E+00 | 2,70E-01 | 5,66E-01 | Sars2         | 1,10 | No  |
| ENSMUSG00000070702 | -1,87E+00 | -3,107637761 | 1,39E+00 | 2,38E-01 | 5,50E-01 | Csn1s1        | 0,27 | No  |
| ENSMUSG00000070705 | -3,54E-02 | 2,411097566  | 7,18E-02 | 7,89E-01 | 9,54E-01 | Eid2b         | 0,98 | No  |
| ENSMUSG00000070709 | -5,99E-02 | 2,247120041  | 1,95E-01 | 6,58E-01 | 8,81E-01 | Zfp974        | 0,96 | No  |
| ENSMUSG00000070713 | 1,37E-01  | 5,887487976  | 4,27E+00 | 3,88E-02 | 2,33E-01 | Gm10282       | 1,10 | No  |
| ENSMUSG00000070717 | -2,52E-02 | -0,454664272 | 4,81E-03 | 9,45E-01 | 1,00E+00 | Gm10300       | 0,98 | No  |
| ENSMUSG00000070719 | -5,35E-01 | 1,650419227  | 1,10E+01 | 9,10E-04 | 1,50E-02 | Pla2g4d       | 0,69 | Yes |
| ENSMUSG00000070720 | -7,41E-01 | -2,548136224 | 6,15E-01 | 4,33E-01 | 7,26E-01 | Tmem200b      | 0,60 | No  |
| ENSMUSG00000070729 | -1,48E-01 | 7,4904196    | 6,24E+00 | 1,25E-02 | 1,10E-01 | Gm12966       | 0,90 | No  |
| ENSMUSG00000070730 | -5,78E-02 | 4,570083911  | 5,28E-01 | 4,68E-01 | 7,56E-01 | Rmdn3         | 0,96 | No  |
| ENSMUSG00000070732 | -1,15E-01 | 0,458157754  | 2,30E-01 | 6,31E-01 | 8,64E-01 | Rbm44         | 0,92 | No  |
| ENSMUSG00000070733 | -2,32E-02 | 6,869078623  | 1,44E-01 | 7,05E-01 | 9,07E-01 | Fryl          | 0,98 | No  |
| ENSMUSG00000070737 | -9,77E-02 | 3,670011383  | 1,06E+00 | 3,03E-01 | 5,99E-01 | Tmem35b       | 0,93 | No  |
| ENSMUSG00000070738 | 7,44E-02  | 6,369863933  | 1,38E+00 | 2,41E-01 | 5,50E-01 | Dgkd          | 1,05 | No  |
| ENSMUSG00000070778 | 2,65E+00  | -2,896119006 | 2,71E+00 | 9,98E-02 | 3,92E-01 | Rpl7a-ps8     | 6,28 | No  |
| ENSMUSG00000070780 | 1,04E-01  | 5,353960341  | 2,18E+00 | 1,40E-01 | 4,73E-01 | Rbm47         | 1,07 | No  |
| ENSMUSG00000070797 | -2,74E+00 | -3,033596063 | 2,99E+00 | 8,38E-02 | 3,71E-01 | Psg27         | 0,15 | No  |
| ENSMUSG00000070803 | 8,77E-02  | 1,74478111   | 3,00E-01 | 5,84E-01 | 8,38E-01 | Cited4        | 1,06 | No  |
| ENSMUSG00000070806 | -6,06E-02 | -2,770638974 | 2,49E-03 | 9,60E-01 | 1,00E+00 | Zmynd12       | 0,96 | No  |
| ENSMUSG00000070808 | 6,82E-02  | 5,141218239  | 8,90E-01 | 3,46E-01 | 6,47E-01 | Bicra         | 1,05 | No  |
| ENSMUSG00000070814 | 2,55E-02  | 1,60283841   | 2,44E-02 | 8,76E-01 | 1,00E+00 | 6330408A02Rik | 1,02 | No  |
| ENSMUSG00000070821 | 1,85E+00  | -3,107657832 | 1,35E+00 | 2,46E-01 | 5,50E-01 | Olf1340       | 3,61 | No  |
| ENSMUSG00000070822 | -6,44E-01 | -0,006499409 | 4,66E+00 | 3,10E-02 | 2,03E-01 | Zscan18       | 0,64 | No  |
| ENSMUSG00000070834 | 4,33E-01  | -0,641326375 | 1,29E+00 | 2,56E-01 | 5,50E-01 | Gm13015       | 1,35 | No  |



|                    |           |              |           |          |          |               |      |     |
|--------------------|-----------|--------------|-----------|----------|----------|---------------|------|-----|
| ENSMUSG00000070844 | -1,87E+00 | -3,107637761 | 1,39E+00  | 2,38E-01 | 5,50E-01 | Vmn2r42       | 0,27 | No  |
| ENSMUSG00000070847 | -8,15E-01 | -2,863692811 | 3,64E-01  | 5,46E-01 | 8,14E-01 | Vmn2r30       | 0,57 | No  |
| ENSMUSG00000070858 | -8,07E-02 | -1,655230023 | 1,67E-02  | 8,97E-01 | 1,00E+00 | Gm1673        | 0,95 | No  |
| ENSMUSG00000070867 | 2,64E+00  | -3,033673223 | 2,69E+00  | 1,01E-01 | 3,92E-01 | Trabd2b       | 6,23 | No  |
| ENSMUSG00000070868 | 7,36E-01  | 0,330590726  | 6,87E+00  | 8,77E-03 | 8,48E-02 | Skint3        | 1,67 | No  |
| ENSMUSG00000070870 | -1,89E+00 | -3,1076441   | 1,42E+00  | 2,33E-01 | 5,50E-01 | Cryge         | 0,27 | No  |
| ENSMUSG00000070871 | 7,49E-02  | 3,874688784  | 6,74E-01  | 4,12E-01 | 7,07E-01 | Ccnyl1        | 1,05 | No  |
| ENSMUSG00000070873 | 3,47E-01  | 2,435762473  | 6,58E+00  | 1,03E-02 | 9,56E-02 | Lilra5        | 1,27 | No  |
| ENSMUSG00000070877 | 1,17E+00  | -1,863839301 | 2,31E+00  | 1,29E-01 | 4,50E-01 | Ldlrad1       | 2,24 | No  |
| ENSMUSG00000070880 | -2,63E-02 | -3,033641358 | 2,33E-04  | 9,88E-01 | 1,00E+00 | Gad1          | 0,98 | No  |
| ENSMUSG00000070883 | -1,96E-01 | -0,006958646 | 4,24E-01  | 5,15E-01 | 7,96E-01 | Ccdc173       | 0,87 | No  |
| ENSMUSG00000070891 | -1,18E-01 | -0,64153748  | 9,96E-02  | 7,52E-01 | 9,32E-01 | Gm12689       | 0,92 | No  |
| ENSMUSG00000070896 | 3,14E-02  | -3,107617333 | -7,69E-10 | 1,00E+00 | 1,00E+00 | Rpl23a-ps1    | 1,02 | No  |
| ENSMUSG00000070900 | 3,58E-01  | -0,41919954  | 1,08E+00  | 2,98E-01 | 5,94E-01 | Gm10306       | 1,28 | No  |
| ENSMUSG00000070904 | 1,85E+00  | -3,107657832 | 1,35E+00  | 2,46E-01 | 5,50E-01 | Ifna4         | 3,61 | No  |
| ENSMUSG00000070908 | -7,13E-01 | -2,655115042 | 5,68E-01  | 4,51E-01 | 7,41E-01 | Gm13288       | 0,61 | No  |
| ENSMUSG00000070923 | 2,55E-01  | 5,807640898  | 1,48E+01  | 1,22E-04 | 2,86E-03 | Klhl9         | 1,19 | Yes |
| ENSMUSG00000070934 | 1,73E-01  | 5,93622456   | 6,83E+00  | 8,95E-03 | 8,60E-02 | Rraga         | 1,13 | No  |
| ENSMUSG00000070939 | 3,78E-02  | 6,154461256  | 3,43E-01  | 5,58E-01 | 8,22E-01 | Tgfbrap1      | 1,03 | No  |
| ENSMUSG00000070942 | 1,95E-01  | 6,199165595  | 9,20E+00  | 2,42E-03 | 3,26E-02 | Il1rl2        | 1,14 | Yes |
| ENSMUSG00000070953 | -6,39E-02 | 3,535399736  | 4,11E-01  | 5,21E-01 | 8,00E-01 | Rabepk        | 0,96 | No  |
| ENSMUSG00000070960 | 3,84E-01  | 3,185675598  | 1,25E+01  | 4,14E-04 | 7,84E-03 | Gm19680       | 1,30 | Yes |
| ENSMUSG00000070972 | 1,45E-01  | 4,043618857  | 2,64E+00  | 1,04E-01 | 3,96E-01 | Dnajc25       | 1,11 | No  |
| ENSMUSG00000070979 | 8,94E-01  | -1,770558319 | 1,76E+00  | 1,84E-01 | 5,48E-01 | Actl7a        | 1,86 | No  |
| ENSMUSG00000070980 | 8,10E-01  | -2,600690781 | 5,71E-01  | 4,50E-01 | 7,40E-01 | Actl7b        | 1,75 | No  |
| ENSMUSG00000070990 | 1,85E+00  | -3,107657832 | 1,35E+00  | 2,46E-01 | 5,50E-01 | Foxe1         | 3,61 | No  |
| ENSMUSG00000070997 | -3,95E-02 | -0,473098436 | 1,28E-02  | 9,10E-01 | 1,00E+00 | 1700055D18Rik | 0,97 | No  |
| ENSMUSG00000070999 | -8,88E-01 | 1,013396574  | 1,98E+01  | 8,39E-06 | 2,87E-04 | Ccin          | 0,54 | Yes |
| ENSMUSG00000071014 | -1,33E-01 | 4,507989852  | 2,74E+00  | 9,78E-02 | 3,90E-01 | Ndufb6        | 0,91 | No  |
| ENSMUSG00000071033 | -4,85E-01 | -2,974942494 | 9,25E-02  | 7,61E-01 | 9,37E-01 | Gm10308       | 0,71 | No  |
| ENSMUSG00000071035 | 5,49E-03  | 4,752814594  | 5,05E-03  | 9,43E-01 | 1,00E+00 | Gm5499        | 1,00 | No  |
| ENSMUSG00000071036 | -6,44E-02 | -2,770648468 | 1,80E-03  | 9,66E-01 | 1,00E+00 | Gm10309       | 0,96 | No  |

|                    |           |              |          |          |          |               |      |     |
|--------------------|-----------|--------------|----------|----------|----------|---------------|------|-----|
| ENSMUSG00000071037 | 4,53E-02  | 0,694369611  | 3,49E-02 | 8,52E-01 | 9,90E-01 | Camkmt        | 1,03 | No  |
| ENSMUSG00000071040 | -6,19E-01 | -2,033744279 | 7,44E-01 | 3,88E-01 | 6,88E-01 | Gm9386        | 0,65 | No  |
| ENSMUSG00000071041 | 9,07E-03  | 6,534882297  | 2,10E-02 | 8,85E-01 | 1,00E+00 | Impdh2-ps     | 1,01 | No  |
| ENSMUSG00000071042 | -8,00E-02 | 2,014719978  | 2,94E-01 | 5,88E-01 | 8,40E-01 | Rasgrp3       | 0,95 | No  |
| ENSMUSG00000071052 | -1,82E-01 | 4,559554825  | 5,26E+00 | 2,18E-02 | 1,59E-01 | Rpl7a-ps5     | 0,88 | No  |
| ENSMUSG00000071054 | -1,40E-02 | 6,491080843  | 4,95E-02 | 8,24E-01 | 9,73E-01 | Safb          | 0,99 | No  |
| ENSMUSG00000071064 | -9,73E-01 | 1,753415484  | 3,86E+01 | 5,14E-10 | 4,39E-08 | Zfp827        | 0,51 | Yes |
| ENSMUSG00000071068 | -7,25E-01 | 6,211008669  | 1,27E+02 | 1,77E-29 | 9,49E-27 | Trem12        | 0,61 | Yes |
| ENSMUSG00000071072 | 2,08E-01  | 5,816586185  | 9,78E+00 | 1,76E-03 | 2,52E-02 | Ptges3        | 1,16 | Yes |
| ENSMUSG00000071073 | 1,56E-01  | -0,413144309 | 2,08E-01 | 6,48E-01 | 8,75E-01 | Lrrc73        | 1,11 | No  |
| ENSMUSG00000071074 | 6,56E-02  | 5,85978794   | 9,77E-01 | 3,23E-01 | 6,23E-01 | Yipf3         | 1,05 | No  |
| ENSMUSG00000071076 | 1,97E-01  | 7,789362621  | 1,12E+01 | 8,02E-04 | 1,35E-02 | Jund          | 1,15 | Yes |
| ENSMUSG00000071078 | 4,02E-03  | 4,19520528   | 2,23E-03 | 9,62E-01 | 1,00E+00 | Nr2c2ap       | 1,00 | No  |
| ENSMUSG00000071089 | -3,20E+00 | -2,655163116 | 4,32E+00 | 3,76E-02 | 2,30E-01 | Trim75        | 0,11 | No  |
| ENSMUSG00000071102 | -7,25E-02 | -0,006877568 | 5,47E-02 | 8,15E-01 | 9,69E-01 | Gm10313       | 0,95 | No  |
| ENSMUSG00000071103 | 6,64E-01  | -1,37836308  | 1,70E+00 | 1,93E-01 | 5,50E-01 | 1700029J07Rik | 1,58 | No  |
| ENSMUSG00000071112 | -6,91E-02 | -0,755475743 | 2,57E-02 | 8,73E-01 | 1,00E+00 | Spx           | 0,95 | No  |
| ENSMUSG00000071113 | -1,40E+00 | -2,896110316 | 1,23E+00 | 2,67E-01 | 5,63E-01 | Mboat4        | 0,38 | No  |
| ENSMUSG00000071141 | -1,56E-01 | 6,16283634   | 5,87E+00 | 1,54E-02 | 1,28E-01 | Rpl36a-ps3    | 0,90 | No  |
| ENSMUSG00000071151 | -7,82E-02 | 5,627584609  | 1,32E+00 | 2,50E-01 | 5,50E-01 | Gm4799        | 0,95 | No  |
| ENSMUSG00000071172 | 5,54E-02  | 7,372813119  | 8,66E-01 | 3,52E-01 | 6,53E-01 | Srsf3         | 1,04 | No  |
| ENSMUSG00000071176 | -4,34E-01 | -0,718767026 | 1,22E+00 | 2,70E-01 | 5,66E-01 | Arhgef10      | 0,74 | No  |
| ENSMUSG00000071180 | 1,28E-01  | 5,876452435  | 3,72E+00 | 5,39E-02 | 2,84E-01 | Smim15        | 1,09 | No  |
| ENSMUSG00000071181 | -3,81E-01 | 0,010936691  | 1,72E+00 | 1,90E-01 | 5,50E-01 | 3830408C21Rik | 0,77 | No  |
| ENSMUSG00000071192 | 5,78E-02  | 2,734881157  | 2,16E-01 | 6,42E-01 | 8,71E-01 | Wfikkn1       | 1,04 | No  |
| ENSMUSG00000071202 | 5,98E-02  | 0,240465859  | 5,00E-02 | 8,23E-01 | 9,73E-01 | Ccdc78        | 1,04 | No  |
| ENSMUSG00000071203 | 1,45E-01  | 5,807463173  | 4,76E+00 | 2,91E-02 | 1,94E-01 | Naip5         | 1,11 | No  |
| ENSMUSG00000071207 | 1,00E-01  | 0,560459322  | 1,75E-01 | 6,75E-01 | 8,91E-01 | Gm8587        | 1,07 | No  |
| ENSMUSG00000071226 | -8,23E-02 | -0,485318362 | 5,04E-02 | 8,22E-01 | 9,72E-01 | Cecr2         | 0,94 | No  |
| ENSMUSG00000071229 | -9,38E-01 | -1,896068382 | 2,46E+00 | 1,16E-01 | 4,23E-01 | Timm8a2       | 0,52 | No  |
| ENSMUSG00000071230 | 1,81E+00  | -3,10765737  | 1,28E+00 | 2,58E-01 | 5,50E-01 | Npw           | 3,49 | No  |
| ENSMUSG00000071237 | 2,02E-01  | -1,333315464 | 1,66E-01 | 6,84E-01 | 8,96E-01 | Gemin6-ps     | 1,15 | No  |

|                    |           |              |          |          |          |                |      |     |
|--------------------|-----------|--------------|----------|----------|----------|----------------|------|-----|
| ENSMUSG00000071252 | 1,02E-01  | 0,932084959  | 2,24E-01 | 6,36E-01 | 8,67E-01 | 2210408I21Rik  | 1,07 | No  |
| ENSMUSG00000071253 | 1,18E-01  | 4,530427063  | 2,16E+00 | 1,42E-01 | 4,76E-01 | Slc25a16       | 1,09 | No  |
| ENSMUSG00000071256 | -4,72E-02 | 2,500758964  | 1,33E-01 | 7,16E-01 | 9,13E-01 | Zfp213         | 0,97 | No  |
| ENSMUSG00000071262 | -1,38E-01 | 0,221787533  | 2,61E-01 | 6,09E-01 | 8,51E-01 | Zfp957         | 0,91 | No  |
| ENSMUSG00000071266 | -2,59E-02 | 3,404014537  | 6,41E-02 | 8,00E-01 | 9,60E-01 | Zfp946         | 0,98 | No  |
| ENSMUSG00000071267 | -7,28E-02 | 4,263661488  | 7,58E-01 | 3,84E-01 | 6,85E-01 | Zfp942         | 0,95 | No  |
| ENSMUSG00000071273 | 8,56E-02  | 2,843470342  | 5,27E-01 | 4,68E-01 | 7,56E-01 | Gm5145         | 1,06 | No  |
| ENSMUSG00000071280 | -1,94E+00 | -3,107619243 | 1,50E+00 | 2,21E-01 | 5,50E-01 | Gm10322        | 0,26 | No  |
| ENSMUSG00000071281 | 3,22E-01  | 3,563514155  | 1,11E+01 | 8,41E-04 | 1,40E-02 | Zfp65          | 1,25 | Yes |
| ENSMUSG00000071291 | 3,52E-01  | 1,553725766  | 4,31E+00 | 3,79E-02 | 2,31E-01 | Zfp58          | 1,28 | No  |
| ENSMUSG00000071294 | -2,99E+00 | -2,655119895 | 3,63E+00 | 5,67E-02 | 2,93E-01 | Cbx3-ps4       | 0,13 | No  |
| ENSMUSG00000071302 | 4,93E-02  | 2,390598356  | 1,46E-01 | 7,03E-01 | 9,06E-01 | 2610044O15Rik8 | 1,03 | No  |
| ENSMUSG00000071303 | 4,98E-02  | 4,749520936  | 4,20E-01 | 5,17E-01 | 7,98E-01 | Rps8-ps1       | 1,04 | No  |
| ENSMUSG00000071311 | -6,48E-01 | -1,770597373 | 1,06E+00 | 3,03E-01 | 6,00E-01 | Gpr31b         | 0,64 | No  |
| ENSMUSG00000071317 | -8,71E-01 | -2,831957839 | 4,16E-01 | 5,19E-01 | 7,98E-01 | Bves           | 0,55 | No  |
| ENSMUSG00000071322 | -5,57E-02 | -2,0701431   | 5,76E-03 | 9,40E-01 | 1,00E+00 | Tcp10a         | 0,96 | No  |
| ENSMUSG00000071324 | -1,31E-01 | 0,934373943  | 3,99E-01 | 5,28E-01 | 8,04E-01 | Armc2          | 0,91 | No  |
| ENSMUSG00000071332 | 1,17E+00  | -2,033713631 | 2,33E+00 | 1,27E-01 | 4,47E-01 | E230015B07Rik  | 2,25 | No  |
| ENSMUSG00000071335 | -1,90E-01 | -0,006882198 | 4,53E-01 | 5,01E-01 | 7,86E-01 | Mfsd4b3        | 0,88 | No  |
| ENSMUSG00000071337 | -3,31E-02 | 5,122289271  | 2,13E-01 | 6,45E-01 | 8,73E-01 | Tia1           | 0,98 | No  |
| ENSMUSG00000071340 | -7,61E-02 | -2,401462629 | 5,22E-03 | 9,42E-01 | 1,00E+00 | Trappc3l       | 0,95 | No  |
| ENSMUSG00000071341 | -4,16E+00 | -2,600560606 | 8,81E+00 | 3,00E-03 | 3,83E-02 | Egr4           | 0,06 | Yes |
| ENSMUSG00000071342 | 8,10E-01  | -2,355574068 | 5,72E-01 | 4,49E-01 | 7,40E-01 | Lsmem1         | 1,75 | No  |
| ENSMUSG00000071343 | -1,86E-02 | 3,52617539   | 3,56E-02 | 8,50E-01 | 9,90E-01 | Gm10327        | 0,99 | No  |
| ENSMUSG00000071347 | -1,36E+00 | -2,896086315 | 1,16E+00 | 2,81E-01 | 5,78E-01 | C1qtnf9        | 0,39 | No  |
| ENSMUSG00000071350 | -1,40E-01 | 4,356572219  | 2,90E+00 | 8,84E-02 | 3,79E-01 | Setdb2         | 0,91 | No  |
| ENSMUSG00000071359 | -8,96E-02 | 4,41386094   | 1,21E+00 | 2,72E-01 | 5,68E-01 | Tbpl1          | 0,94 | No  |
| ENSMUSG00000071369 | 2,82E-01  | 4,11002359   | 1,05E+01 | 1,21E-03 | 1,90E-02 | Map3k5         | 1,22 | Yes |
| ENSMUSG00000071379 | 1,37E-01  | 6,950375612  | 5,07E+00 | 2,43E-02 | 1,72E-01 | Hpcal1         | 1,10 | No  |
| ENSMUSG00000071392 | 3,35E-01  | -2,65513271  | 1,15E-01 | 7,35E-01 | 9,24E-01 | Ect2l          | 1,26 | No  |
| ENSMUSG00000071398 | -5,75E-04 | 0,705199053  | 5,77E-06 | 9,98E-01 | 1,00E+00 | 2410004P03Rik  | 1,00 | No  |
| ENSMUSG00000071414 | 7,92E-02  | 4,819732356  | 1,07E+00 | 3,00E-01 | 5,96E-01 | Gm6736         | 1,06 | No  |

|                    |           |              |          |          |          |               |      |     |
|--------------------|-----------|--------------|----------|----------|----------|---------------|------|-----|
| ENSMUSG00000071415 | -1,34E-01 | 5,103807171  | 3,39E+00 | 6,58E-02 | 3,22E-01 | Rpl23         | 0,91 | No  |
| ENSMUSG00000071419 | -2,16E-01 | 7,908375701  | 1,36E+01 | 2,22E-04 | 4,72E-03 | Rps15-ps2     | 0,86 | Yes |
| ENSMUSG00000071424 | 1,81E+00  | -3,10765737  | 1,28E+00 | 2,58E-01 | 5,50E-01 | Grid2         | 3,49 | No  |
| ENSMUSG00000071434 | -1,87E+00 | -3,107637761 | 1,39E+00 | 2,38E-01 | 5,50E-01 | 9230019H11Rik | 0,27 | No  |
| ENSMUSG00000071451 | -2,54E-01 | 3,666713698  | 7,13E+00 | 7,58E-03 | 7,60E-02 | Psmg4         | 0,84 | No  |
| ENSMUSG00000071454 | -2,72E-01 | 2,062670654  | 3,53E+00 | 6,03E-02 | 3,04E-01 | Dtnb          | 0,83 | No  |
| ENSMUSG00000071456 | 1,10E-02  | 2,082479874  | 5,62E-03 | 9,40E-01 | 1,00E+00 | 1110002L01Rik | 1,01 | No  |
| ENSMUSG00000071477 | -2,51E-02 | 4,184513922  | 8,63E-02 | 7,69E-01 | 9,42E-01 | Zfp777        | 0,98 | No  |
| ENSMUSG00000071478 | -2,92E-01 | -0,980410919 | 4,72E-01 | 4,92E-01 | 7,78E-01 | Hist1h2ad     | 0,82 | No  |
| ENSMUSG00000071489 | 2,67E+00  | -3,033636951 | 2,76E+00 | 9,68E-02 | 3,88E-01 | Ptgdr         | 6,36 | No  |
| ENSMUSG00000071494 | 1,81E+00  | -3,10765737  | 1,28E+00 | 2,58E-01 | 5,50E-01 | Olfr455       | 3,49 | No  |
| ENSMUSG00000071497 | 5,72E-02  | 4,846473197  | 5,64E-01 | 4,52E-01 | 7,42E-01 | Nutf2-ps1     | 1,04 | No  |
| ENSMUSG00000071506 | 7,67E-01  | -2,963261668 | 3,24E-01 | 5,69E-01 | 8,30E-01 | Tmem139       | 1,70 | No  |
| ENSMUSG00000071510 | 1,12E+00  | -2,311104714 | 1,19E+00 | 2,76E-01 | 5,73E-01 | Olfr172       | 2,17 | No  |
| ENSMUSG00000071516 | -4,15E-01 | -1,785618436 | 4,29E-01 | 5,12E-01 | 7,95E-01 | Hist1h2ai     | 0,75 | No  |
| ENSMUSG00000071528 | -1,10E-01 | 1,021364434  | 2,92E-01 | 5,89E-01 | 8,41E-01 | Usmg5         | 0,93 | No  |
| ENSMUSG00000071531 | -2,08E+00 | -2,655102051 | 3,28E+00 | 7,02E-02 | 3,35E-01 | Gprin2        | 0,24 | No  |
| ENSMUSG00000071532 | -1,33E-01 | 7,114051681  | 4,84E+00 | 2,78E-02 | 1,88E-01 | Gm10335       | 0,91 | No  |
| ENSMUSG00000071533 | -1,15E-01 | 5,895050756  | 3,03E+00 | 8,20E-02 | 3,68E-01 | Pcnp          | 0,92 | No  |
| ENSMUSG00000071537 | 4,20E-01  | 3,840397359  | 1,97E+01 | 8,88E-06 | 3,02E-04 | Klrg2         | 1,34 | Yes |
| ENSMUSG00000071547 | 2,67E-01  | 3,869309975  | 8,30E+00 | 3,96E-03 | 4,70E-02 | Nt5dc2        | 1,20 | Yes |
| ENSMUSG00000071550 | -1,89E+00 | -3,1076441   | 1,42E+00 | 2,33E-01 | 5,50E-01 | Cfap44        | 0,27 | No  |
| ENSMUSG00000071551 | -2,70E+00 | -2,963266517 | 2,89E+00 | 8,90E-02 | 3,79E-01 | Akr1c19       | 0,15 | No  |
| ENSMUSG00000071552 | -7,08E-02 | -1,832002152 | 1,40E-02 | 9,06E-01 | 1,00E+00 | Tigit         | 0,95 | No  |
| ENSMUSG00000071553 | -2,07E-01 | -1,655016721 | 1,25E-01 | 7,24E-01 | 9,17E-01 | Cpa2          | 0,87 | No  |
| ENSMUSG00000071561 | -2,82E+00 | -2,711642336 | 5,19E+00 | 2,27E-02 | 1,64E-01 | BC100530      | 0,14 | No  |
| ENSMUSG00000071562 | -2,11E-01 | -1,800899902 | 1,09E-01 | 7,42E-01 | 9,27E-01 | Stfa1         | 0,86 | No  |
| ENSMUSG00000071568 | 6,40E-01  | 1,48611016   | 1,28E+01 | 3,50E-04 | 6,88E-03 | Gm5874        | 1,56 | Yes |
| ENSMUSG00000071573 | -2,91E-02 | 1,976903731  | 3,80E-02 | 8,46E-01 | 9,87E-01 | Rnls          | 0,98 | No  |
| ENSMUSG00000071586 | 3,04E-01  | -1,401476339 | 3,43E-01 | 5,58E-01 | 8,22E-01 | Gm10337       | 1,23 | No  |
| ENSMUSG00000071591 | -1,87E+00 | -3,107637761 | 1,39E+00 | 2,38E-01 | 5,50E-01 | Gm10339       | 0,27 | No  |
| ENSMUSG00000071604 | 5,93E-02  | -0,561149272 | 2,33E-02 | 8,79E-01 | 1,00E+00 | Fam189a2      | 1,04 | No  |

|                    |           |              |           |          |          |               |      |     |
|--------------------|-----------|--------------|-----------|----------|----------|---------------|------|-----|
| ENSMUSG00000071613 | 3,14E-02  | -3,107617333 | -7,69E-10 | 1,00E+00 | 1,00E+00 | Gm10340       | 1,02 | No  |
| ENSMUSG00000071632 | -1,27E-01 | 2,528530983  | 9,83E-01  | 3,21E-01 | 6,22E-01 | 2510002D24Rik | 0,92 | No  |
| ENSMUSG00000071633 | 3,16E+00  | -2,770590572 | 4,07E+00  | 4,37E-02 | 2,49E-01 | Gm4952        | 8,94 | No  |
| ENSMUSG00000071636 | -1,75E-01 | -1,548228939 | 1,04E-01  | 7,47E-01 | 9,30E-01 | Rimbp3        | 0,89 | No  |
| ENSMUSG00000071637 | 4,66E-01  | 4,698298835  | 3,61E+01  | 1,84E-09 | 1,45E-07 | Cebpδ         | 1,38 | Yes |
| ENSMUSG00000071640 | -2,00E-01 | 4,706111867  | 6,75E+00  | 9,37E-03 | 8,90E-02 | Stxbp3-ps     | 0,87 | No  |
| ENSMUSG00000071644 | 3,26E-02  | 6,287223547  | 2,61E-01  | 6,10E-01 | 8,51E-01 | Eef1g         | 1,02 | No  |
| ENSMUSG00000071645 | 8,33E-02  | 4,11484426   | 9,31E-01  | 3,35E-01 | 6,35E-01 | Tut1          | 1,06 | No  |
| ENSMUSG00000071646 | 4,38E-02  | 7,181418612  | 5,30E-01  | 4,67E-01 | 7,55E-01 | Mta2          | 1,03 | No  |
| ENSMUSG00000071647 | 1,01E-01  | 6,054585528  | 2,42E+00  | 1,20E-01 | 4,30E-01 | Eml3          | 1,07 | No  |
| ENSMUSG00000071648 | -4,04E-01 | 2,091668282  | 7,79E+00  | 5,27E-03 | 5,80E-02 | Rom1          | 0,76 | No  |
| ENSMUSG00000071649 | 7,64E-03  | 5,244647089  | 1,15E-02  | 9,15E-01 | 1,00E+00 | B3gat3        | 1,01 | No  |
| ENSMUSG00000071650 | 6,50E-02  | 7,652286012  | 1,22E+00  | 2,69E-01 | 5,66E-01 | Ganab         | 1,05 | No  |
| ENSMUSG00000071652 | 8,51E-02  | 5,30253076   | 1,46E+00  | 2,28E-01 | 5,50E-01 | Ints5         | 1,06 | No  |
| ENSMUSG00000071653 | 3,39E-02  | 2,529000708  | 6,88E-02  | 7,93E-01 | 9,56E-01 | 1810009A15Rik | 1,02 | No  |
| ENSMUSG00000071654 | -1,04E-01 | 4,353321806  | 1,59E+00  | 2,07E-01 | 5,50E-01 | Uqcc3         | 0,93 | No  |
| ENSMUSG00000071655 | -1,35E-01 | 6,214300204  | 4,43E+00  | 3,53E-02 | 2,22E-01 | Ubxn1         | 0,91 | No  |
| ENSMUSG00000071656 | -7,09E-01 | -1,088616669 | 2,19E+00  | 1,39E-01 | 4,71E-01 | Lrrn4cl       | 0,61 | No  |
| ENSMUSG00000071657 | 1,56E-01  | 5,339974619  | 4,90E+00  | 2,68E-02 | 1,84E-01 | Bscl2         | 1,11 | No  |
| ENSMUSG00000071658 | 2,97E-01  | 0,652571046  | 1,61E+00  | 2,04E-01 | 5,50E-01 | Gng3          | 1,23 | No  |
| ENSMUSG00000071659 | 2,99E-02  | 8,119772848  | 2,67E-01  | 6,06E-01 | 8,49E-01 | Hnrnpul2      | 1,02 | No  |
| ENSMUSG00000071660 | -1,12E-01 | 5,55799054   | 2,72E+00  | 9,90E-02 | 3,92E-01 | Ttc9c         | 0,93 | No  |
| ENSMUSG00000071661 | 5,49E-01  | 0,526652801  | 5,30E+00  | 2,14E-02 | 1,58E-01 | Zbtb3         | 1,46 | No  |
| ENSMUSG00000071662 | -1,34E-01 | 5,001773768  | 3,29E+00  | 6,95E-02 | 3,32E-01 | Polr2g        | 0,91 | No  |
| ENSMUSG00000071669 | 2,26E-01  | 3,167787806  | 4,34E+00  | 3,72E-02 | 2,29E-01 | Snx29         | 1,17 | No  |
| ENSMUSG00000071671 | -5,69E-01 | 0,281316238  | 4,67E+00  | 3,07E-02 | 2,02E-01 | Gm10343       | 0,67 | No  |
| ENSMUSG00000071691 | -4,47E-01 | -2,355577026 | 2,04E-01  | 6,52E-01 | 8,77E-01 | Gm960         | 0,73 | No  |
| ENSMUSG00000071711 | 5,71E-02  | 4,590089985  | 5,18E-01  | 4,72E-01 | 7,60E-01 | Mpst          | 1,04 | No  |
| ENSMUSG00000071713 | -1,51E-01 | 11,74703014  | 7,35E+00  | 6,72E-03 | 6,98E-02 | Csf2rb        | 0,90 | No  |
| ENSMUSG00000071714 | -2,45E-01 | 10,67180788  | 1,91E+01  | 1,25E-05 | 4,09E-04 | Csf2rb2       | 0,84 | Yes |
| ENSMUSG00000071715 | -1,52E-01 | 5,971349899  | 5,37E+00  | 2,05E-02 | 1,54E-01 | Ncf4          | 0,90 | No  |
| ENSMUSG00000071716 | -1,87E+00 | -3,107637761 | 1,39E+00  | 2,38E-01 | 5,50E-01 | Apol7e        | 0,27 | No  |

|                    |           |              |           |          |          |               |       |      |     |
|--------------------|-----------|--------------|-----------|----------|----------|---------------|-------|------|-----|
| ENSMUSG00000071724 | -6,81E-01 | 0,024204048  | 5,67E+00  | 1,72E-02 | 1,37E-01 | Smpd5         |       | 0,62 | No  |
| ENSMUSG00000071757 | -3,16E-01 | 2,984359446  | 8,09E+00  | 4,45E-03 | 5,11E-02 | Zhx2          |       | 0,80 | No  |
| ENSMUSG00000071793 | -1,04E-01 | 4,340225165  | 1,59E+00  | 2,07E-01 | 5,50E-01 | 2610005L07Rik |       | 0,93 | No  |
| ENSMUSG00000071796 | -1,65E-01 | 5,193742523  | 5,24E+00  | 2,21E-02 | 1,61E-01 | 6820431F20Rik |       | 0,89 | No  |
| ENSMUSG00000071847 | -7,04E-01 | -0,831925123 | 3,45E+00  | 6,34E-02 | 3,14E-01 | Apccd1        |       | 0,61 | No  |
| ENSMUSG00000071855 | 2,57E-03  | 2,055618379  | 3,12E-04  | 9,86E-01 | 1,00E+00 | Ccdc112       |       | 1,00 | No  |
| ENSMUSG00000071856 | 2,25E-01  | -2,522733744 | 6,37E-02  | 8,01E-01 | 9,61E-01 | Mcc           |       | 1,17 | No  |
| ENSMUSG00000071862 | -3,40E-01 | -1,107535215 | 5,91E-01  | 4,42E-01 | 7,34E-01 | Lrrtm2        |       | 0,79 | No  |
| ENSMUSG00000071866 | -7,57E-02 | 7,604214563  | 1,64E+00  | 2,00E-01 | 5,50E-01 | Ppia          |       | 0,95 | No  |
| ENSMUSG00000071867 | 9,23E-03  | 4,013797456  | 1,08E-02  | 9,17E-01 | 1,00E+00 | Gm6304        |       | 1,01 | No  |
| ENSMUSG00000071893 | 2,17E-01  | -2,548185163 | 5,87E-02  | 8,09E-01 | 9,65E-01 | Vmn1r4        |       | 1,16 | No  |
| ENSMUSG00000071984 | -2,70E+00 | -3,033614577 | 2,89E+00  | 8,93E-02 | 3,79E-01 | Fndc1         |       | 0,15 | No  |
| ENSMUSG00000072066 | 1,44E-01  | 2,697137427  | 1,44E+00  | 2,31E-01 | 5,50E-01 | 6720489N17Rik |       | 1,10 | No  |
| ENSMUSG00000072082 | 2,33E-01  | 5,021976433  | 1,00E+01  | 1,53E-03 | 2,26E-02 | Ccnf          |       | 1,18 | Yes |
| ENSMUSG00000072109 | -5,53E-01 | 4,361337039  | 4,48E+01  | 2,18E-11 | 2,22E-09 | A530040E14Rik |       | 0,68 | Yes |
| ENSMUSG00000072115 | 3,57E-01  | 1,549587001  | 3,81E+00  | 5,09E-02 | 2,74E-01 | Ang           |       | 1,28 | No  |
| ENSMUSG00000072214 | 2,51E-01  | 1,347877858  | 1,84E+00  | 1,75E-01 | 5,33E-01 |               | 38596 | 1,19 | No  |
| ENSMUSG00000072235 | -6,84E-02 | 7,763554522  | 1,36E+00  | 2,43E-01 | 5,50E-01 | Tuba1a        |       | 0,95 | No  |
| ENSMUSG00000072244 | -2,57E-01 | 3,255226187  | 5,94E+00  | 1,48E-02 | 1,25E-01 | Trim6         |       | 0,84 | No  |
| ENSMUSG00000072255 | 1,25E+00  | -1,92936973  | 2,12E+00  | 1,45E-01 | 4,82E-01 | Rpl31-ps17    |       | 2,38 | No  |
| ENSMUSG00000072258 | 4,15E-02  | 2,700018205  | 1,11E-01  | 7,39E-01 | 9,26E-01 | Taf1a         |       | 1,03 | No  |
| ENSMUSG00000072294 | -1,69E-01 | -1,024372641 | 1,49E-01  | 7,00E-01 | 9,04E-01 | Klf12         |       | 0,89 | No  |
| ENSMUSG00000072324 | 1,87E+00  | -2,963248007 | 1,36E+00  | 2,44E-01 | 5,50E-01 | Gm8420        |       | 3,65 | No  |
| ENSMUSG00000072381 | 3,98E-01  | 0,948012455  | 3,25E+00  | 7,14E-02 | 3,38E-01 | Gm10355       |       | 1,32 | No  |
| ENSMUSG00000072387 | 2,30E-01  | 1,917954108  | 2,28E+00  | 1,31E-01 | 4,55E-01 | Gm10356       |       | 1,17 | No  |
| ENSMUSG00000072407 | -2,12E-02 | 4,004406646  | 5,71E-02  | 8,11E-01 | 9,66E-01 | Gm6419        |       | 0,99 | No  |
| ENSMUSG00000072419 | 1,81E+00  | -3,10765737  | 1,28E+00  | 2,58E-01 | 5,50E-01 | Dppa2         |       | 3,49 | No  |
| ENSMUSG00000072421 | 2,25E-02  | 2,888861226  | 3,71E-02  | 8,47E-01 | 9,87E-01 | Gm10357       |       | 1,02 | No  |
| ENSMUSG00000072423 | 1,62E-03  | -2,963242114 | -1,56E-12 | 1,00E+00 | 1,00E+00 | Psmb11        |       | 1,00 | No  |
| ENSMUSG00000072437 | 3,41E-01  | 5,362802395  | 2,30E+01  | 1,64E-06 | 6,86E-05 | Nanos1        |       | 1,27 | Yes |
| ENSMUSG00000072460 | 6,40E-03  | 3,226507687  | 3,61E-03  | 9,52E-01 | 1,00E+00 | Atp5l-ps1     |       | 1,00 | No  |
| ENSMUSG00000072476 | 1,24E-01  | 1,454899136  | 4,70E-01  | 4,93E-01 | 7,79E-01 | Gm9008        |       | 1,09 | No  |

|                    |           |              |           |          |          |               |      |     |
|--------------------|-----------|--------------|-----------|----------|----------|---------------|------|-----|
| ENSMUSG00000072487 | -1,89E+00 | -3,1076441   | 1,42E+00  | 2,33E-01 | 5,50E-01 | Mroh5         | 0,27 | No  |
| ENSMUSG00000072492 | -1,25E+00 | -2,600641909 | 1,51E+00  | 2,20E-01 | 5,50E-01 | Gm10364       | 0,42 | No  |
| ENSMUSG00000072494 | 2,22E-01  | 3,552993468  | 5,12E+00  | 2,36E-02 | 1,69E-01 | Ppp1r3e       | 1,17 | No  |
| ENSMUSG00000072501 | 7,41E-02  | 6,467068111  | 1,39E+00  | 2,38E-01 | 5,50E-01 | Phf20l1       | 1,05 | No  |
| ENSMUSG00000072541 | 2,34E-01  | 3,721860768  | 6,04E+00  | 1,40E-02 | 1,20E-01 | Gm5046        | 1,18 | No  |
| ENSMUSG00000072553 | -2,00E+00 | -2,770572116 | 3,02E+00  | 8,23E-02 | 3,69E-01 | Gm525         | 0,25 | No  |
| ENSMUSG00000072568 | -4,69E-01 | 4,670766781  | 3,58E+01  | 2,20E-09 | 1,69E-07 | Fam84b        | 0,72 | Yes |
| ENSMUSG00000072571 | 2,19E-01  | -0,683271252 | 3,63E-01  | 5,47E-01 | 8,15E-01 | Tmem253       | 1,16 | No  |
| ENSMUSG00000072572 | 2,95E-01  | 5,382544008  | 1,76E+01  | 2,72E-05 | 8,08E-04 | Slc39a2       | 1,23 | Yes |
| ENSMUSG00000072573 | -1,32E+00 | -0,436559587 | 1,30E+01  | 3,07E-04 | 6,17E-03 | Gm10369       | 0,40 | Yes |
| ENSMUSG00000072575 | -2,63E-02 | -3,033653157 | 2,33E-04  | 9,88E-01 | 1,00E+00 | Eddm3b        | 0,98 | No  |
| ENSMUSG00000072576 | 1,47E+00  | -2,627629394 | 1,86E+00  | 1,73E-01 | 5,30E-01 | Gm16020       | 2,78 | No  |
| ENSMUSG00000072582 | -1,58E-03 | 3,904755951  | 3,02E-04  | 9,86E-01 | 1,00E+00 | Pthr2         | 1,00 | No  |
| ENSMUSG00000072584 | 1,81E+00  | -3,10765737  | 1,28E+00  | 2,58E-01 | 5,50E-01 | Gm7489        | 3,49 | No  |
| ENSMUSG00000072589 | -3,83E-02 | -3,107651936 | -7,91E-11 | 1,00E+00 | 1,00E+00 | Gm10371       | 0,97 | No  |
| ENSMUSG00000072591 | 2,64E+00  | -2,896137133 | 2,70E+00  | 1,01E-01 | 3,92E-01 | 5930412G12Rik | 6,24 | No  |
| ENSMUSG00000072592 | 2,60E+00  | -2,963258458 | 2,63E+00  | 1,05E-01 | 3,97E-01 | Gm10373       | 6,08 | No  |
| ENSMUSG00000072594 | 4,07E-01  | 3,590813574  | 1,68E+01  | 4,07E-05 | 1,14E-03 | Gm16439       | 1,33 | Yes |
| ENSMUSG00000072596 | 6,38E-01  | 6,512228729  | 1,00E+02  | 1,28E-23 | 4,12E-21 | Ear2          | 1,56 | Yes |
| ENSMUSG00000072598 | 1,79E+00  | -3,033666867 | 1,28E+00  | 2,58E-01 | 5,50E-01 | Ang6          | 3,46 | No  |
| ENSMUSG00000072599 | 6,18E-01  | -1,980512631 | 7,73E-01  | 3,79E-01 | 6,80E-01 | Ear-ps2       | 1,53 | No  |
| ENSMUSG00000072600 | -2,34E+00 | -2,929293556 | 2,15E+00  | 1,42E-01 | 4,77E-01 | Ear-ps9       | 0,20 | No  |
| ENSMUSG00000072601 | -1,22E+00 | -0,641365038 | 1,03E+01  | 1,31E-03 | 2,01E-02 | Ear1          | 0,43 | Yes |
| ENSMUSG00000072612 | -4,59E-01 | 2,75052573   | 1,36E+01  | 2,27E-04 | 4,82E-03 | Gm10382       | 0,73 | Yes |
| ENSMUSG00000072618 | 4,17E-01  | 0,087260143  | 2,12E+00  | 1,45E-01 | 4,83E-01 | Gm10384       | 1,33 | No  |
| ENSMUSG00000072620 | 2,75E-02  | 8,314859042  | 2,26E-01  | 6,34E-01 | 8,66E-01 | Slfn2         | 1,02 | No  |
| ENSMUSG00000072621 | 1,10E-01  | 4,184364774  | 1,69E+00  | 1,94E-01 | 5,50E-01 | Slfn10-ps     | 1,08 | No  |
| ENSMUSG00000072623 | 3,62E-01  | -0,070738602 | 1,51E+00  | 2,20E-01 | 5,50E-01 | Zfp9          | 1,29 | No  |
| ENSMUSG00000072640 | 1,18E-01  | 2,601490699  | 9,22E-01  | 3,37E-01 | 6,37E-01 | Lyrm9         | 1,09 | No  |
| ENSMUSG00000072647 | 1,35E-01  | 0,941404951  | 4,07E-01  | 5,23E-01 | 8,01E-01 | Adam1a        | 1,10 | No  |
| ENSMUSG00000072653 | 3,55E-01  | 1,764632783  | 4,88E+00  | 2,72E-02 | 1,86E-01 | Zfp783        | 1,28 | No  |
| ENSMUSG00000072660 | -1,90E-01 | -0,634488009 | 2,63E-01  | 6,08E-01 | 8,51E-01 | Gm6288        | 0,88 | No  |

|                    |           |              |           |          |          |               |       |     |
|--------------------|-----------|--------------|-----------|----------|----------|---------------|-------|-----|
| ENSMUSG00000072662 | -1,03E+00 | -1,896010355 | 2,35E+00  | 1,25E-01 | 4,43E-01 | Mansc4        | 0,49  | No  |
| ENSMUSG00000072663 | 2,20E-01  | 1,744763774  | 1,85E+00  | 1,74E-01 | 5,31E-01 | Spef2         | 1,16  | No  |
| ENSMUSG00000072673 | 4,08E-01  | 1,239074627  | 4,40E+00  | 3,59E-02 | 2,25E-01 | Gm10392       | 1,33  | No  |
| ENSMUSG00000072674 | 1,81E+00  | -3,10765737  | 1,28E+00  | 2,58E-01 | 5,50E-01 | Plac9b        | 3,49  | No  |
| ENSMUSG00000072675 | 1,81E+00  | -3,10765737  | 1,28E+00  | 2,58E-01 | 5,50E-01 | Duxbl2        | 3,49  | No  |
| ENSMUSG00000072676 | -7,26E-02 | 2,464448394  | 3,06E-01  | 5,80E-01 | 8,37E-01 | Tmem254a      | 0,95  | No  |
| ENSMUSG00000072679 | 1,87E+00  | -3,033632735 | 1,36E+00  | 2,43E-01 | 5,50E-01 | D6Ertd474e    | 3,66  | No  |
| ENSMUSG00000072680 | -1,19E-01 | 2,532299722  | 8,45E-01  | 3,58E-01 | 6,59E-01 | Tmem254c      | 0,92  | No  |
| ENSMUSG00000072683 | 7,20E-01  | -1,669170076 | 1,57E+00  | 2,10E-01 | 5,50E-01 | Gm7457        | 1,65  | No  |
| ENSMUSG00000072688 | 1,33E+00  | -2,574230047 | 1,44E+00  | 2,30E-01 | 5,50E-01 | Gm10399       | 2,51  | No  |
| ENSMUSG00000072692 | -3,22E-01 | 8,47306789   | 3,14E+01  | 2,07E-08 | 1,34E-06 | Rpl37rt       | 0,80  | Yes |
| ENSMUSG00000072693 | 6,27E-03  | 2,725898475  | 2,65E-03  | 9,59E-01 | 1,00E+00 | Gm10401       | 1,00  | No  |
| ENSMUSG00000072694 | -8,52E-02 | 2,915522883  | 5,55E-01  | 4,56E-01 | 7,46E-01 | 1500011B03Rik | 0,94  | No  |
| ENSMUSG00000072704 | 2,89E-02  | 5,431360627  | 1,73E-01  | 6,78E-01 | 8,92E-01 | Smim101l      | 1,02  | No  |
| ENSMUSG00000072707 | 1,81E+00  | -2,963282131 | 1,30E+00  | 2,54E-01 | 5,50E-01 | Olfr31        | 3,50  | No  |
| ENSMUSG00000072714 | -4,54E-02 | -2,107647014 | 4,27E-03  | 9,48E-01 | 1,00E+00 | Rpl21-ps4     | 0,97  | No  |
| ENSMUSG00000072717 | 3,14E-02  | -3,107617333 | -7,69E-10 | 1,00E+00 | 1,00E+00 | Klra11-ps     | 1,02  | No  |
| ENSMUSG00000072718 | 3,51E+00  | -2,77064274  | 5,34E+00  | 2,08E-02 | 1,55E-01 | Klra10        | 11,37 | No  |
| ENSMUSG00000072720 | 9,43E-02  | -1,863852447 | 2,41E-02  | 8,77E-01 | 1,00E+00 | Myo18b        | 1,07  | No  |
| ENSMUSG00000072721 | -1,94E+00 | -3,107619243 | 1,50E+00  | 2,21E-01 | 5,50E-01 | Klra14-ps     | 0,26  | No  |
| ENSMUSG00000072722 | -3,83E-02 | -3,107651936 | -7,91E-11 | 1,00E+00 | 1,00E+00 | Gm6588        | 0,97  | No  |
| ENSMUSG00000072731 | -7,90E-01 | -2,574197874 | 8,04E-01  | 3,70E-01 | 6,71E-01 | Gm3715        | 0,58  | No  |
| ENSMUSG00000072754 | -2,69E+00 | -2,963207085 | 2,87E+00  | 9,01E-02 | 3,80E-01 | Lrcol1        | 0,16  | No  |
| ENSMUSG00000072761 | -3,36E-01 | 0,575367624  | 1,99E+00  | 1,58E-01 | 5,05E-01 | Gm6712        | 0,79  | No  |
| ENSMUSG00000072762 | -1,92E-01 | 1,399740185  | 1,14E+00  | 2,85E-01 | 5,81E-01 | 4930522L14Rik | 0,88  | No  |
| ENSMUSG00000072763 | -3,71E-02 | 0,382248992  | 2,22E-02  | 8,82E-01 | 1,00E+00 | 5430403G16Rik | 0,97  | No  |
| ENSMUSG00000072768 | -7,38E-02 | 1,16610886   | 1,44E-01  | 7,04E-01 | 9,06E-01 | Gm10418       | 0,95  | No  |
| ENSMUSG00000072769 | -6,45E-02 | -1,070125177 | 2,43E-02  | 8,76E-01 | 1,00E+00 | Gm10419       | 0,96  | No  |
| ENSMUSG00000072770 | 5,27E-02  | 1,452891043  | 9,45E-02  | 7,59E-01 | 9,36E-01 | Acrbp         | 1,04  | No  |
| ENSMUSG00000072772 | -1,61E-01 | 4,251460895  | 3,68E+00  | 5,52E-02 | 2,88E-01 | Grcc10        | 0,89  | No  |
| ENSMUSG00000072774 | 2,87E-01  | 2,103097357  | 4,14E+00  | 4,20E-02 | 2,44E-01 | Zfp951        | 1,22  | No  |
| ENSMUSG00000072778 | 9,01E-03  | -3,107646452 | -5,16E-10 | 1,00E+00 | 1,00E+00 | Vmn2r27       | 1,01  | No  |



|                    |           |              |           |          |          |               |      |     |
|--------------------|-----------|--------------|-----------|----------|----------|---------------|------|-----|
| ENSMUSG00000072789 | 4,31E-03  | 4,666908695  | 3,01E-03  | 9,56E-01 | 1,00E+00 | Gm10420       | 1,00 | No  |
| ENSMUSG00000072809 | 1,39E-01  | 3,074519117  | 1,56E+00  | 2,11E-01 | 5,50E-01 | 9330160F10Rik | 1,10 | No  |
| ENSMUSG00000072812 | 3,16E-01  | 7,205236711  | 2,76E+01  | 1,53E-07 | 8,13E-06 | Ahnak2        | 1,25 | Yes |
| ENSMUSG00000072825 | -5,71E-02 | 5,376944203  | 6,60E-01  | 4,17E-01 | 7,12E-01 | Cep170b       | 0,96 | No  |
| ENSMUSG00000072837 | 1,01E-02  | 2,872313164  | 7,58E-03  | 9,31E-01 | 1,00E+00 | Mir546        | 1,01 | No  |
| ENSMUSG00000072847 | 2,90E-01  | 3,259826999  | 7,56E+00  | 5,96E-03 | 6,38E-02 | A530017D24Rik | 1,22 | No  |
| ENSMUSG00000072852 | -7,77E-02 | -2,355645327 | 8,35E-03  | 9,27E-01 | 1,00E+00 | 2310040G07Rik | 0,95 | No  |
| ENSMUSG00000072872 | -1,75E-01 | 3,706348948  | 3,42E+00  | 6,46E-02 | 3,18E-01 | Rybp          | 0,89 | No  |
| ENSMUSG00000072874 | 1,85E-01  | -0,061002069 | 4,02E-01  | 5,26E-01 | 8,03E-01 | Gm6116        | 1,14 | No  |
| ENSMUSG00000072875 | 7,29E-01  | -2,832014431 | 2,89E-01  | 5,91E-01 | 8,41E-01 | Gpr27         | 1,66 | No  |
| ENSMUSG00000072884 | -1,04E+00 | -1,770667114 | 2,75E+00  | 9,75E-02 | 3,90E-01 | Gm10433       | 0,49 | No  |
| ENSMUSG00000072889 | 1,76E-01  | 4,031081244  | 4,03E+00  | 4,48E-02 | 2,52E-01 | Nfxl1         | 1,13 | No  |
| ENSMUSG00000072893 | 9,33E-02  | 3,474115483  | 8,46E-01  | 3,58E-01 | 6,59E-01 | 4933439C10Rik | 1,07 | No  |
| ENSMUSG00000072898 | -3,00E-02 | 0,705177174  | 1,70E-02  | 8,96E-01 | 1,00E+00 | Gm10434       | 0,98 | No  |
| ENSMUSG00000072902 | -2,70E+00 | -3,033614577 | 2,89E+00  | 8,93E-02 | 3,79E-01 | Gm10435       | 0,15 | No  |
| ENSMUSG00000072905 | -2,47E+00 | -2,548242653 | 5,27E+00  | 2,17E-02 | 1,59E-01 | Gm2016        | 0,18 | No  |
| ENSMUSG00000072915 | -2,12E-01 | 0,569211556  | 8,35E-01  | 3,61E-01 | 6,62E-01 | Gm12258       | 0,86 | No  |
| ENSMUSG00000072919 | -2,21E-01 | -0,541895141 | 4,01E-01  | 5,27E-01 | 8,03E-01 | Noxred1       | 0,86 | No  |
| ENSMUSG00000072940 | -1,82E-01 | 7,550595877  | 9,46E+00  | 2,10E-03 | 2,90E-02 | Gm10443       | 0,88 | Yes |
| ENSMUSG00000072941 | -1,14E+00 | 0,152721795  | 1,86E+01  | 1,62E-05 | 5,14E-04 | Sod3          | 0,45 | Yes |
| ENSMUSG00000072946 | -1,53E-02 | 4,807779552  | 4,04E-02  | 8,41E-01 | 9,84E-01 | Ptgr2         | 0,99 | No  |
| ENSMUSG00000072949 | 7,26E-02  | 2,055928325  | 2,40E-01  | 6,24E-01 | 8,59E-01 | Acot1         | 1,05 | No  |
| ENSMUSG00000072950 | -1,92E+00 | -3,033623267 | 1,46E+00  | 2,27E-01 | 5,50E-01 | Gm10444       | 0,26 | No  |
| ENSMUSG00000072952 | -3,83E-02 | -3,107651936 | -7,91E-11 | 1,00E+00 | 1,00E+00 | Gm5878        | 0,97 | No  |
| ENSMUSG00000072962 | 1,20E+00  | -3,146123991 | 6,74E-01  | 4,12E-01 | 7,07E-01 | Gm16401       | 2,30 | No  |
| ENSMUSG00000072963 | -1,92E+00 | -2,963214917 | 1,46E+00  | 2,27E-01 | 5,50E-01 | Gm10447       | 0,26 | No  |
| ENSMUSG00000072968 | 4,12E-01  | -0,311359154 | 1,28E+00  | 2,58E-01 | 5,50E-01 | Gm17728       | 1,33 | No  |
| ENSMUSG00000072972 | 5,32E-01  | -0,627589987 | 1,93E+00  | 1,64E-01 | 5,16E-01 | Adam4         | 1,45 | No  |
| ENSMUSG00000072974 | 3,53E-01  | -0,801156946 | 8,04E-01  | 3,70E-01 | 6,71E-01 | Gm4787        | 1,28 | No  |
| ENSMUSG00000072978 | -1,26E-01 | 3,832361695  | 1,92E+00  | 1,66E-01 | 5,18E-01 | Gm5830        | 0,92 | No  |
| ENSMUSG00000072980 | 3,34E-01  | 2,891036315  | 8,32E+00  | 3,92E-03 | 4,66E-02 | Oip5          | 1,26 | Yes |
| ENSMUSG00000072999 | -6,83E-01 | -2,627624449 | 4,45E-01  | 5,05E-01 | 7,89E-01 | Gm15401       | 0,62 | No  |

|                    |           |              |          |          |          |               |      |     |
|--------------------|-----------|--------------|----------|----------|----------|---------------|------|-----|
| ENSMUSG00000073000 | 1,86E-01  | 0,214382889  | 4,84E-01 | 4,86E-01 | 7,74E-01 | Gm10451       | 1,14 | No  |
| ENSMUSG00000073002 | -1,13E-01 | 2,071121733  | 5,99E-01 | 4,39E-01 | 7,32E-01 | Vamp5         | 0,92 | No  |
| ENSMUSG00000073018 | -6,71E-01 | -0,697254944 | 3,34E+00 | 6,77E-02 | 3,28E-01 | Gm1070        | 0,63 | No  |
| ENSMUSG00000073067 | 2,08E-01  | 2,553746363  | 2,63E+00 | 1,05E-01 | 3,97E-01 | 9130019P16Rik | 1,16 | No  |
| ENSMUSG00000073073 | -3,36E-01 | -1,946110422 | 2,88E-01 | 5,91E-01 | 8,42E-01 | Gm8098        | 0,79 | No  |
| ENSMUSG00000073079 | -6,94E-02 | 5,315572734  | 9,59E-01 | 3,28E-01 | 6,28E-01 | Srp54a        | 0,95 | No  |
| ENSMUSG00000073096 | 3,06E-02  | 3,849183274  | 1,14E-01 | 7,36E-01 | 9,24E-01 | Lrrc61        | 1,02 | No  |
| ENSMUSG00000073102 | 3,83E-01  | -2,998009655 | 7,32E-02 | 7,87E-01 | 9,53E-01 | Drc1          | 1,30 | No  |
| ENSMUSG00000073111 | -1,87E+00 | -3,107637761 | 1,39E+00 | 2,38E-01 | 5,50E-01 | Olfr446       | 0,27 | No  |
| ENSMUSG00000073117 | 1,79E+00  | -3,033666867 | 1,28E+00 | 2,58E-01 | 5,50E-01 | Gm7347        | 3,46 | No  |
| ENSMUSG00000073119 | 1,87E+00  | -3,107639691 | 1,38E+00 | 2,40E-01 | 5,50E-01 | Speer4a       | 3,67 | No  |
| ENSMUSG00000073144 | 1,47E-01  | 2,612790154  | 1,32E+00 | 2,51E-01 | 5,50E-01 | 4930599N23Rik | 1,11 | No  |
| ENSMUSG00000073145 | -1,15E-01 | -0,683027528 | 9,48E-02 | 7,58E-01 | 9,36E-01 | Gm12000       | 0,92 | No  |
| ENSMUSG00000073147 | -1,47E-01 | 3,382032517  | 2,07E+00 | 1,50E-01 | 4,92E-01 | 5031425E22Rik | 0,90 | No  |
| ENSMUSG00000073154 | 1,04E+00  | -2,929311517 | 4,67E-01 | 4,94E-01 | 7,80E-01 | 9330158H04Rik | 2,06 | No  |
| ENSMUSG00000073155 | -7,11E-02 | 6,174857982  | 1,22E+00 | 2,70E-01 | 5,66E-01 | 1810058I24Rik | 0,95 | No  |
| ENSMUSG00000073158 | -7,34E-01 | -2,497593856 | 6,04E-01 | 4,37E-01 | 7,30E-01 | 9030624G23Rik | 0,60 | No  |
| ENSMUSG00000073164 | -3,68E-01 | -2,800979556 | 8,35E-02 | 7,73E-01 | 9,44E-01 | 2410018L13Rik | 0,77 | No  |
| ENSMUSG00000073174 | 1,25E+00  | -2,37819723  | 1,53E+00 | 2,16E-01 | 5,50E-01 | Gm29254       | 2,37 | No  |
| ENSMUSG00000073179 | -4,49E-01 | -1,311042927 | 9,12E-01 | 3,40E-01 | 6,40E-01 | Gm10478       | 0,73 | No  |
| ENSMUSG00000073197 | -5,38E-02 | -1,896140246 | 6,74E-03 | 9,35E-01 | 1,00E+00 | 5730507C01Rik | 0,96 | No  |
| ENSMUSG00000073198 | 4,78E-02  | 5,851550813  | 5,18E-01 | 4,72E-01 | 7,60E-01 | Bnip3l-ps     | 1,03 | No  |
| ENSMUSG00000073209 | -1,91E+00 | -2,963238542 | 1,45E+00 | 2,29E-01 | 5,50E-01 | Klf14         | 0,27 | No  |
| ENSMUSG00000073226 | -1,75E-02 | 1,572674369  | 1,01E-02 | 9,20E-01 | 1,00E+00 | Gm10482       | 0,99 | No  |
| ENSMUSG00000073233 | 9,33E-02  | 4,477371542  | 1,33E+00 | 2,49E-01 | 5,50E-01 | Gm9144        | 1,07 | No  |
| ENSMUSG00000073234 | -7,77E-01 | 0,160268829  | 8,65E+00 | 3,27E-03 | 4,09E-02 | Gm8773        | 0,58 | Yes |
| ENSMUSG00000073236 | -2,18E-02 | 0,560433373  | 7,94E-03 | 9,29E-01 | 1,00E+00 | 2500004C02Rik | 0,99 | No  |
| ENSMUSG00000073242 | -2,66E-01 | 2,524213273  | 4,43E+00 | 3,53E-02 | 2,23E-01 | Dnmt3aos      | 0,83 | No  |
| ENSMUSG00000073371 | -1,92E+00 | -3,0336536   | 1,46E+00 | 2,27E-01 | 5,50E-01 | Gm6594        | 0,26 | No  |
| ENSMUSG00000073374 | -1,60E-01 | 0,348440366  | 3,81E-01 | 5,37E-01 | 8,09E-01 | C030034I22Rik | 0,90 | No  |
| ENSMUSG00000073386 | -2,97E-01 | 2,091552992  | 4,23E+00 | 3,96E-02 | 2,36E-01 | 9830107B12Rik | 0,81 | No  |
| ENSMUSG00000073394 | 3,63E-01  | 1,47891449   | 3,77E+00 | 5,21E-02 | 2,78E-01 | Runx2os1      | 1,29 | No  |

|                    |           |              |          |          |          |               |  |      |     |
|--------------------|-----------|--------------|----------|----------|----------|---------------|--|------|-----|
| ENSMUSG00000073399 | 1,63E+00  | -2,655125983 | 1,81E+00 | 1,78E-01 | 5,39E-01 | Trim40        |  | 3,09 | No  |
| ENSMUSG00000073400 | -2,64E+00 | -2,963219259 | 2,78E+00 | 9,55E-02 | 3,86E-01 | Trim10        |  | 0,16 | No  |
| ENSMUSG00000073402 | -3,37E-01 | 2,318158795  | 6,01E+00 | 1,42E-02 | 1,21E-01 | Gm8909        |  | 0,79 | No  |
| ENSMUSG00000073403 | -5,41E-01 | -2,448641072 | 3,49E-01 | 5,54E-01 | 8,20E-01 | Gm10499       |  | 0,69 | No  |
| ENSMUSG00000073405 | 2,90E-01  | 3,277130499  | 7,65E+00 | 5,68E-03 | 6,14E-02 | H2-T-ps       |  | 1,22 | No  |
| ENSMUSG00000073406 | 1,31E-01  | -1,980524426 | 4,31E-02 | 8,36E-01 | 9,80E-01 | H2-BI         |  | 1,10 | No  |
| ENSMUSG00000073407 | -3,47E-02 | -2,318585597 | 2,07E-03 | 9,64E-01 | 1,00E+00 | Gm6034        |  | 0,98 | No  |
| ENSMUSG00000073409 | -6,42E-01 | 6,3125018    | 1,02E+02 | 4,64E-24 | 1,51E-21 | H2-Q6         |  | 0,64 | Yes |
| ENSMUSG00000073411 | -2,11E-01 | 10,44232098  | 1,42E+01 | 1,64E-04 | 3,66E-03 | H2-D1         |  | 0,86 | Yes |
| ENSMUSG00000073412 | -1,16E-01 | 2,868152857  | 1,00E+00 | 3,17E-01 | 6,18E-01 | Lst1          |  | 0,92 | No  |
| ENSMUSG00000073413 | 1,08E+00  | -2,574265681 | 1,11E+00 | 2,92E-01 | 5,88E-01 | Ly6g6d        |  | 2,12 | No  |
| ENSMUSG00000073414 | -1,51E+00 | -2,146065661 | 4,17E+00 | 4,12E-02 | 2,41E-01 | G6b           |  | 0,35 | No  |
| ENSMUSG00000073415 | -4,59E-01 | -0,355474275 | 1,76E+00 | 1,85E-01 | 5,48E-01 | Gm10501       |  | 0,73 | No  |
| ENSMUSG00000073418 | -1,80E-01 | -1,655102751 | 1,02E-01 | 7,50E-01 | 9,31E-01 | C4b           |  | 0,88 | No  |
| ENSMUSG00000073421 | -3,86E-02 | 11,43246137  | 4,78E-01 | 4,89E-01 | 7,76E-01 | H2-Ab1        |  | 0,97 | No  |
| ENSMUSG00000073422 | 4,23E-02  | 2,394427826  | 9,78E-02 | 7,54E-01 | 9,34E-01 | H2-Ke6        |  | 1,03 | No  |
| ENSMUSG00000073423 | -9,65E-02 | 4,39869652   | 1,38E+00 | 2,40E-01 | 5,50E-01 | Zfp414        |  | 0,94 | No  |
| ENSMUSG00000073424 | -1,87E+00 | -3,107637761 | 1,39E+00 | 2,38E-01 | 5,50E-01 | Cyp4f15       |  | 0,27 | No  |
| ENSMUSG00000073427 | -7,06E-02 | 1,54813673   | 1,75E-01 | 6,76E-01 | 8,91E-01 | Gm4924        |  | 0,95 | No  |
| ENSMUSG00000073430 | -9,26E-01 | -2,60066999  | 7,51E-01 | 3,86E-01 | 6,87E-01 | Gm10505       |  | 0,53 | No  |
| ENSMUSG00000073433 | -6,03E-02 | -0,855789142 | 2,07E-02 | 8,85E-01 | 1,00E+00 | Arhgdig       |  | 0,96 | No  |
| ENSMUSG00000073434 | 8,42E-02  | 4,87489373   | 1,23E+00 | 2,67E-01 | 5,63E-01 | Wdr90         |  | 1,06 | No  |
| ENSMUSG00000073435 | -7,15E-02 | 0,749319525  | 1,00E-01 | 7,51E-01 | 9,32E-01 | Nme3          |  | 0,95 | No  |
| ENSMUSG00000073436 | 6,60E-02  | 4,82451982   | 7,56E-01 | 3,85E-01 | 6,86E-01 | Eme2          |  | 1,05 | No  |
| ENSMUSG00000073437 | 3,10E-02  | 4,107554805  | 1,28E-01 | 7,20E-01 | 9,15E-01 | D330041H03Rik |  | 1,02 | No  |
| ENSMUSG00000073448 | -3,06E-02 | 0,502151233  | 1,59E-02 | 9,00E-01 | 1,00E+00 | Gm10509       |  | 0,98 | No  |
| ENSMUSG00000073457 | -1,89E+00 | -3,1076441   | 1,42E+00 | 2,33E-01 | 5,50E-01 | Smok2b        |  | 0,27 | No  |
| ENSMUSG00000073460 | -3,68E-01 | -0,366772885 | 1,22E+00 | 2,69E-01 | 5,65E-01 | Pnlcd1        |  | 0,77 | No  |
| ENSMUSG00000073468 | 4,13E-02  | 4,916264364  | 3,02E-01 | 5,83E-01 | 8,38E-01 | Sft2d1        |  | 1,03 | No  |
| ENSMUSG00000073471 | -2,54E-01 | 4,010587463  | 8,28E+00 | 4,01E-03 | 4,74E-02 | Rsph3a        |  | 0,84 | Yes |
| ENSMUSG00000073478 | -3,71E-02 | 0,175773481  | 1,79E-02 | 8,93E-01 | 1,00E+00 | D730003I15Rik |  | 0,97 | No  |
| ENSMUSG00000073481 | 1,70E-01  | 5,348329299  | 5,82E+00 | 1,58E-02 | 1,31E-01 | Marc2         |  | 1,13 | No  |

|                    |           |              |           |          |          |               |      |     |
|--------------------|-----------|--------------|-----------|----------|----------|---------------|------|-----|
| ENSMUSG00000073482 | -2,70E+00 | -2,896043557 | 2,88E+00  | 8,95E-02 | 3,79E-01 | Gm10517       | 0,15 | No  |
| ENSMUSG00000073485 | -8,24E-02 | -1,548284736 | 2,30E-02  | 8,79E-01 | 1,00E+00 | H3f3aos       | 0,94 | No  |
| ENSMUSG00000073486 | 1,16E-01  | 0,71854832   | 2,68E-01  | 6,05E-01 | 8,49E-01 | Gm10518       | 1,08 | No  |
| ENSMUSG00000073489 | 4,23E-03  | 5,181283448  | 3,40E-03  | 9,53E-01 | 1,00E+00 | lfi204        | 1,00 | No  |
| ENSMUSG00000073490 | 3,00E-02  | 6,622318957  | 2,33E-01  | 6,29E-01 | 8,62E-01 | lfi207        | 1,02 | No  |
| ENSMUSG00000073491 | -2,66E-01 | 0,338069498  | 1,05E+00  | 3,05E-01 | 6,02E-01 | lfi213        | 0,83 | No  |
| ENSMUSG00000073492 | 2,94E-01  | 4,598682688  | 1,38E+01  | 2,07E-04 | 4,47E-03 | Gm10521       | 1,23 | Yes |
| ENSMUSG00000073494 | 2,93E-01  | 1,986012308  | 3,65E+00  | 5,62E-02 | 2,91E-01 | Sh2d1b2       | 1,22 | No  |
| ENSMUSG00000073497 | -5,25E-02 | -3,033661434 | 4,08E-11  | 1,00E+00 | 1,00E+00 | AA792892      | 0,96 | No  |
| ENSMUSG00000073514 | 3,14E-02  | -3,107617333 | -7,69E-10 | 1,00E+00 | 1,00E+00 | Dok6          | 1,02 | No  |
| ENSMUSG00000073529 | -1,57E-01 | 2,153418036  | 1,17E+00  | 2,79E-01 | 5,76E-01 | F830208F22Rik | 0,90 | No  |
| ENSMUSG00000073530 | -4,90E-01 | -1,770473795 | 5,81E-01  | 4,46E-01 | 7,37E-01 | Pappa2        | 0,71 | No  |
| ENSMUSG00000073535 | 4,92E-01  | -2,7116559   | 1,89E-01  | 6,64E-01 | 8,84E-01 | Gm5532        | 1,41 | No  |
| ENSMUSG00000073538 | -2,95E-02 | 3,373908657  | 8,64E-02  | 7,69E-01 | 9,42E-01 | E330020D12Rik | 0,98 | No  |
| ENSMUSG00000073542 | 1,31E-01  | 3,939169099  | 2,10E+00  | 1,47E-01 | 4,86E-01 | Cep76         | 1,10 | No  |
| ENSMUSG00000073551 | -1,87E+00 | -3,107637761 | 1,39E+00  | 2,38E-01 | 5,50E-01 | Spink13       | 0,27 | No  |
| ENSMUSG00000073554 | 8,56E-02  | 1,115741566  | 1,93E-01  | 6,61E-01 | 8,82E-01 | Gm6960        | 1,06 | No  |
| ENSMUSG00000073555 | 2,13E-02  | 3,269274014  | 4,11E-02  | 8,39E-01 | 9,83E-01 | Gm4951        | 1,01 | No  |
| ENSMUSG00000073557 | 5,60E-02  | 4,334973487  | 4,55E-01  | 5,00E-01 | 7,85E-01 | Ppp1r12b      | 1,04 | No  |
| ENSMUSG00000073559 | 2,66E+00  | -2,896142625 | 2,73E+00  | 9,86E-02 | 3,91E-01 | Gm8618        | 6,32 | No  |
| ENSMUSG00000073563 | 5,69E-02  | 5,360850476  | 6,58E-01  | 4,17E-01 | 7,12E-01 | Csnk1g3       | 1,04 | No  |
| ENSMUSG00000073565 | 1,81E+00  | -3,10765737  | 1,28E+00  | 2,58E-01 | 5,50E-01 | Prr16         | 3,49 | No  |
| ENSMUSG00000073568 | -1,89E+00 | -3,1076441   | 1,42E+00  | 2,33E-01 | 5,50E-01 | Arl14epl      | 0,27 | No  |
| ENSMUSG00000073569 | -6,37E-01 | -1,424766502 | 1,49E+00  | 2,22E-01 | 5,50E-01 | Gm10540       | 0,64 | No  |
| ENSMUSG00000073574 | 2,62E+00  | -3,033654625 | 2,66E+00  | 1,03E-01 | 3,95E-01 | Grxcr2        | 6,16 | No  |
| ENSMUSG00000073590 | 3,83E-01  | 0,458093068  | 2,33E+00  | 1,27E-01 | 4,46E-01 | 3222401L13Rik | 1,30 | No  |
| ENSMUSG00000073591 | -1,87E+00 | -3,03364178  | 1,41E+00  | 2,36E-01 | 5,50E-01 | Pcdhb22       | 0,27 | No  |
| ENSMUSG00000073598 | 5,19E-01  | -2,051856889 | 5,67E-01  | 4,51E-01 | 7,41E-01 | 1700066B19Rik | 1,43 | No  |
| ENSMUSG00000073599 | -1,12E+00 | -2,574205579 | 1,15E+00  | 2,84E-01 | 5,80E-01 | Ecscr         | 0,46 | No  |
| ENSMUSG00000073600 | -8,51E-01 | -1,289354103 | 2,87E+00  | 9,04E-02 | 3,81E-01 | Prob1         | 0,55 | No  |
| ENSMUSG00000073607 | 2,85E-02  | -0,920956747 | 4,88E-03  | 9,44E-01 | 1,00E+00 | Gm10548       | 1,02 | No  |
| ENSMUSG00000073608 | -8,72E-01 | -0,448515547 | 6,73E+00  | 9,49E-03 | 8,98E-02 | Gal3st2c      | 0,55 | No  |

|                    |           |              |          |          |          |               |      |     |
|--------------------|-----------|--------------|----------|----------|----------|---------------|------|-----|
| ENSMUSG00000073609 | 1,10E-02  | 4,094507575  | 1,60E-02 | 8,99E-01 | 1,00E+00 | D2hgdh        | 1,01 | No  |
| ENSMUSG00000073610 | -1,87E+00 | -3,107637761 | 1,39E+00 | 2,38E-01 | 5,50E-01 | Gm10549       | 0,27 | No  |
| ENSMUSG00000073616 | -1,63E-01 | 5,345910874  | 5,34E+00 | 2,08E-02 | 1,55E-01 | Cops9         | 0,89 | No  |
| ENSMUSG00000073627 | 1,14E-02  | -0,136408653 | 1,44E-03 | 9,70E-01 | 1,00E+00 | C130036L24Rik | 1,01 | No  |
| ENSMUSG00000073628 | -3,84E-01 | -0,278605926 | 1,52E+00 | 2,17E-01 | 5,50E-01 | Gm10552       | 0,77 | No  |
| ENSMUSG00000073631 | 1,37E+00  | -2,548229673 | 1,92E+00 | 1,66E-01 | 5,18E-01 | Gm10553       | 2,58 | No  |
| ENSMUSG00000073633 | 2,43E-01  | 0,598614877  | 9,74E-01 | 3,24E-01 | 6,24E-01 | Fbxo36        | 1,18 | No  |
| ENSMUSG00000073639 | 7,65E-02  | 6,376542252  | 1,46E+00 | 2,28E-01 | 5,50E-01 | Rab18         | 1,05 | No  |
| ENSMUSG00000073640 | -2,83E-01 | 7,321705979  | 2,24E+01 | 2,17E-06 | 8,74E-05 | Rpl27-ps3     | 0,82 | Yes |
| ENSMUSG00000073643 | 1,99E-02  | 5,97764757   | 9,21E-02 | 7,62E-01 | 9,38E-01 | Wdfy1         | 1,01 | No  |
| ENSMUSG00000073647 | -1,27E-01 | 5,117174986  | 3,02E+00 | 8,23E-02 | 3,69E-01 | Gm10557       | 0,92 | No  |
| ENSMUSG00000073650 | 2,89E-01  | -2,070213716 | 1,73E-01 | 6,77E-01 | 8,92E-01 | Catip         | 1,22 | No  |
| ENSMUSG00000073652 | 3,21E-01  | 4,156789185  | 1,30E+01 | 3,04E-04 | 6,12E-03 | Apol7d        | 1,25 | Yes |
| ENSMUSG00000073664 | -1,22E-02 | 5,538070808  | 3,11E-02 | 8,60E-01 | 9,95E-01 | Nbeal1        | 0,99 | No  |
| ENSMUSG00000073676 | -1,77E-01 | 4,655571433  | 5,15E+00 | 2,32E-02 | 1,67E-01 | Hspe1         | 0,88 | No  |
| ENSMUSG00000073678 | 2,72E-01  | 6,073354792  | 1,74E+01 | 2,96E-05 | 8,65E-04 | Pgap1         | 1,21 | Yes |
| ENSMUSG00000073679 | 4,27E-01  | -2,740810279 | 9,00E-02 | 7,64E-01 | 9,39E-01 | Mxra8os       | 1,34 | No  |
| ENSMUSG00000073680 | -7,08E-01 | -2,31109151  | 8,51E-01 | 3,56E-01 | 6,57E-01 | Tmem88b       | 0,61 | No  |
| ENSMUSG00000073682 | -4,28E-01 | -1,80105746  | 3,81E-01 | 5,37E-01 | 8,09E-01 | Gm10563       | 0,74 | No  |
| ENSMUSG00000073684 | -5,84E-02 | 4,023486757  | 4,45E-01 | 5,05E-01 | 7,89E-01 | Faap20        | 0,96 | No  |
| ENSMUSG00000073700 | 2,61E-01  | 4,634213574  | 1,13E+01 | 7,64E-04 | 1,30E-02 | Klhl21        | 1,20 | Yes |
| ENSMUSG00000073702 | -2,58E-01 | 3,211107344  | 5,89E+00 | 1,53E-02 | 1,27E-01 | Rpl31         | 0,84 | No  |
| ENSMUSG00000073705 | 1,34E-01  | 2,19530012   | 8,69E-01 | 3,51E-01 | 6,53E-01 | Apitd1        | 1,10 | No  |
| ENSMUSG00000073716 | -1,44E-02 | 2,775752751  | 1,44E-02 | 9,04E-01 | 1,00E+00 | Gm13241       | 0,99 | No  |
| ENSMUSG00000073722 | -3,95E-02 | -2,770598474 | 1,06E-03 | 9,74E-01 | 1,00E+00 | 4931408C20Rik | 0,97 | No  |
| ENSMUSG00000073725 | 1,04E-01  | 5,705803776  | 2,35E+00 | 1,25E-01 | 4,43E-01 | Lmbrd1        | 1,07 | No  |
| ENSMUSG00000073728 | -2,80E-01 | -0,157437922 | 8,68E-01 | 3,52E-01 | 6,53E-01 | Tmem51os1     | 0,82 | No  |
| ENSMUSG00000073731 | -6,50E-02 | 0,993140457  | 9,79E-02 | 7,54E-01 | 9,34E-01 | AI507597      | 0,96 | No  |
| ENSMUSG00000073733 | -1,32E-01 | -0,929319642 | 1,08E-01 | 7,43E-01 | 9,28E-01 | Rsg1          | 0,91 | No  |
| ENSMUSG00000073737 | 1,15E-01  | 4,367511718  | 1,97E+00 | 1,61E-01 | 5,09E-01 | Gm10566       | 1,08 | No  |
| ENSMUSG00000073739 | 9,65E-02  | 0,937013822  | 2,09E-01 | 6,48E-01 | 8,75E-01 | Gm16287       | 1,07 | No  |
| ENSMUSG00000073752 | -5,69E-01 | -2,627686938 | 2,54E-01 | 6,15E-01 | 8,53E-01 | Gm10570       | 0,67 | No  |

|                    |           |              |           |          |          |               |      |     |
|--------------------|-----------|--------------|-----------|----------|----------|---------------|------|-----|
| ENSMUSG00000073753 | 2,25E-01  | -2,40141646  | 6,34E-02  | 8,01E-01 | 9,61E-01 | Gm10571       | 1,17 | No  |
| ENSMUSG00000073755 | -1,37E-01 | 3,727958439  | 2,15E+00  | 1,42E-01 | 4,77E-01 | 5730409E04Rik | 0,91 | No  |
| ENSMUSG00000073758 | -5,53E-01 | 1,959979759  | 1,36E+01  | 2,24E-04 | 4,77E-03 | Sh3d21        | 0,68 | Yes |
| ENSMUSG00000073761 | -1,99E+00 | -2,770603275 | 2,99E+00  | 8,38E-02 | 3,71E-01 | 4933427I04Rik | 0,25 | No  |
| ENSMUSG00000073771 | 2,57E-01  | 3,935799473  | 7,81E+00  | 5,18E-03 | 5,74E-02 | Btbd19        | 1,20 | No  |
| ENSMUSG00000073774 | -3,60E+00 | -2,448584818 | 5,82E+00  | 1,59E-02 | 1,31E-01 | Kncn          | 0,08 | No  |
| ENSMUSG00000073775 | -2,15E-02 | 3,805440617  | 5,33E-02  | 8,17E-01 | 9,70E-01 | Kti12         | 0,99 | No  |
| ENSMUSG00000073778 | 7,46E-02  | 1,297278263  | 1,60E-01  | 6,90E-01 | 8,99E-01 | Faddos        | 1,05 | No  |
| ENSMUSG00000073779 | 1,04E+00  | -2,311269694 | 1,73E+00  | 1,88E-01 | 5,50E-01 | Lrp8os2       | 2,05 | No  |
| ENSMUSG00000073787 | 2,45E-01  | 2,94332557   | 4,55E+00  | 3,29E-02 | 2,12E-01 | Gm10575       | 1,19 | No  |
| ENSMUSG00000073791 | 3,48E-01  | -0,024985448 | 1,35E+00  | 2,45E-01 | 5,50E-01 | Efcab7        | 1,27 | No  |
| ENSMUSG00000073792 | -6,08E-03 | 3,319875727  | 3,47E-03  | 9,53E-01 | 1,00E+00 | Alg6          | 1,00 | No  |
| ENSMUSG00000073795 | -1,22E-01 | 1,110486351  | 3,65E-01  | 5,46E-01 | 8,14E-01 | 6430531B16Rik | 0,92 | No  |
| ENSMUSG00000073797 | -8,56E-01 | -2,832011372 | 4,01E-01  | 5,26E-01 | 8,03E-01 | Gm12650       | 0,55 | No  |
| ENSMUSG00000073802 | -5,41E-01 | 1,974844313  | 1,37E+01  | 2,09E-04 | 4,51E-03 | Cdkn2b        | 0,69 | Yes |
| ENSMUSG00000073803 | -1,87E+00 | -3,107637761 | 1,39E+00  | 2,38E-01 | 5,50E-01 | 4930544L04Rik | 0,27 | No  |
| ENSMUSG00000073805 | -2,81E-01 | -1,574274012 | 2,57E-01  | 6,12E-01 | 8,52E-01 | Fam196a       | 0,82 | No  |
| ENSMUSG00000073807 | 1,87E+00  | -3,033632735 | 1,36E+00  | 2,43E-01 | 5,50E-01 | Gm10581       | 3,66 | No  |
| ENSMUSG00000073809 | -7,01E-02 | -2,998026428 | 1,57E-03  | 9,68E-01 | 1,00E+00 | Gm10583       | 0,95 | No  |
| ENSMUSG00000073821 | -5,15E-01 | -1,548193266 | 9,36E-01  | 3,33E-01 | 6,34E-01 | 8030451A03Rik | 0,70 | No  |
| ENSMUSG00000073838 | 1,67E-02  | 3,887875235  | 3,40E-02  | 8,54E-01 | 9,92E-01 | Tufm          | 1,01 | No  |
| ENSMUSG00000073843 | 2,52E-01  | -0,195810141 | 6,69E-01  | 4,13E-01 | 7,09E-01 | Gm12542       | 1,19 | No  |
| ENSMUSG00000073846 | 9,01E-03  | -3,107646452 | -5,16E-10 | 1,00E+00 | 1,00E+00 | Gm12526       | 1,01 | No  |
| ENSMUSG00000073856 | 3,63E-01  | -0,485356684 | 1,17E+00  | 2,79E-01 | 5,76E-01 | lqck          | 1,29 | No  |
| ENSMUSG00000073860 | 3,14E-02  | -3,107617333 | -7,69E-10 | 1,00E+00 | 1,00E+00 | Gm829         | 1,02 | No  |
| ENSMUSG00000073867 | -6,56E-01 | -0,175615656 | 4,01E+00  | 4,51E-02 | 2,53E-01 | AA474408      | 0,63 | No  |
| ENSMUSG00000073876 | 4,32E-01  | 2,541171791  | 1,11E+01  | 8,55E-04 | 1,42E-02 | Gm13305       | 1,35 | Yes |
| ENSMUSG00000073877 | 1,24E+00  | -2,770593692 | 9,48E-01  | 3,30E-01 | 6,31E-01 | Gm13306       | 2,36 | No  |
| ENSMUSG00000073888 | 1,09E-01  | -1,015823106 | 6,93E-02  | 7,92E-01 | 9,55E-01 | Ccl27a        | 1,08 | No  |
| ENSMUSG00000073889 | 2,45E-01  | 5,650643227  | 1,29E+01  | 3,27E-04 | 6,50E-03 | Il11ra1       | 1,19 | Yes |
| ENSMUSG00000073893 | 3,14E-02  | -3,107617333 | -7,69E-10 | 1,00E+00 | 1,00E+00 | Olfra472      | 1,02 | No  |
| ENSMUSG00000073901 | -3,83E-02 | -3,107651936 | -7,91E-11 | 1,00E+00 | 1,00E+00 | Olfra703      | 0,97 | No  |

|                    |           |              |           |          |          |               |      |     |
|--------------------|-----------|--------------|-----------|----------|----------|---------------|------|-----|
| ENSMUSG00000073902 | 4,11E-01  | 6,395019733  | 4,21E+01  | 8,77E-11 | 8,37E-09 | Gm1966        | 1,33 | Yes |
| ENSMUSG00000073910 | 1,73E-01  | 5,604443647  | 6,34E+00  | 1,18E-02 | 1,05E-01 | Mob3b         | 1,13 | No  |
| ENSMUSG00000073926 | 9,01E-03  | -3,107646452 | -5,16E-10 | 1,00E+00 | 1,00E+00 | Olfr653       | 1,01 | No  |
| ENSMUSG00000073927 | 1,21E-02  | -3,033650469 | 7,34E-11  | 1,00E+00 | 1,00E+00 | Olfr652       | 1,01 | No  |
| ENSMUSG00000073940 | -8,48E-01 | 1,469979191  | 2,52E+01  | 5,09E-07 | 2,42E-05 | Hbb-bt        | 0,56 | Yes |
| ENSMUSG00000073968 | 5,28E-02  | 3,529640535  | 2,92E-01  | 5,89E-01 | 8,41E-01 | Trim68        | 1,04 | No  |
| ENSMUSG00000073969 | -1,87E+00 | -3,03364178  | 1,41E+00  | 2,36E-01 | 5,50E-01 | Olfr556       | 0,27 | No  |
| ENSMUSG00000073973 | -2,63E-02 | -3,033641358 | 2,33E-04  | 9,88E-01 | 1,00E+00 | Olfr552       | 0,98 | No  |
| ENSMUSG00000073975 | -1,89E+00 | -3,1076441   | 1,42E+00  | 2,33E-01 | 5,50E-01 | Olfr550       | 0,27 | No  |
| ENSMUSG00000073980 | 5,29E-01  | -0,929280608 | 1,60E+00  | 2,06E-01 | 5,50E-01 | Gm9574        | 1,44 | No  |
| ENSMUSG00000073982 | -3,37E-02 | 7,807723888  | 3,31E-01  | 5,65E-01 | 8,27E-01 | Rhog          | 0,98 | No  |
| ENSMUSG00000073985 | -2,54E-01 | 2,308041078  | 3,43E+00  | 6,40E-02 | 3,16E-01 | Gm10602       | 0,84 | No  |
| ENSMUSG00000073987 | 4,44E-02  | 5,837291777  | 4,43E-01  | 5,05E-01 | 7,90E-01 | Ggh           | 1,03 | No  |
| ENSMUSG00000073988 | 4,91E-01  | 1,51440354   | 7,76E+00  | 5,34E-03 | 5,87E-02 | Ttpa          | 1,41 | No  |
| ENSMUSG00000073995 | 1,52E-01  | -2,655160083 | 2,24E-02  | 8,81E-01 | 1,00E+00 | Gm10604       | 1,11 | No  |
| ENSMUSG00000074001 | -1,87E+00 | -3,107637761 | 1,39E+00  | 2,38E-01 | 5,50E-01 | Klhl40        | 0,27 | No  |
| ENSMUSG00000074004 | 1,04E-01  | -1,401381167 | 4,58E-02  | 8,31E-01 | 9,77E-01 | B3gnt6        | 1,08 | No  |
| ENSMUSG00000074006 | 6,60E-01  | 0,480431317  | 7,16E+00  | 7,45E-03 | 7,51E-02 | Omp           | 1,58 | No  |
| ENSMUSG00000074024 | -2,17E-01 | 0,078947749  | 6,38E-01  | 4,24E-01 | 7,19E-01 | 4632427E13Rik | 0,86 | No  |
| ENSMUSG00000074026 | 1,51E-01  | 2,738673225  | 1,52E+00  | 2,18E-01 | 5,50E-01 | Gm6091        | 1,11 | No  |
| ENSMUSG00000074028 | 2,82E-01  | -2,574280063 | 8,09E-02  | 7,76E-01 | 9,46E-01 | Slc22a13      | 1,22 | No  |
| ENSMUSG00000074030 | 2,06E-01  | 4,22201953   | 6,07E+00  | 1,38E-02 | 1,18E-01 | Exoc8         | 1,15 | No  |
| ENSMUSG00000074034 | 2,84E-02  | 5,046826943  | 1,49E-01  | 7,00E-01 | 9,04E-01 | Gm5921        | 1,02 | No  |
| ENSMUSG00000074037 | 4,31E-01  | -2,77058342  | 1,45E-01  | 7,03E-01 | 9,06E-01 | Mc1r          | 1,35 | No  |
| ENSMUSG00000074039 | -7,23E-01 | 4,156795779  | 7,57E+01  | 3,27E-18 | 6,49E-16 | 4930520004Rik | 0,61 | Yes |
| ENSMUSG00000074052 | -1,53E+00 | -2,711675362 | 1,54E+00  | 2,15E-01 | 5,50E-01 | BC048644      | 0,35 | No  |
| ENSMUSG00000074063 | -3,03E-01 | 4,788972328  | 1,44E+01  | 1,45E-04 | 3,30E-03 | Osgin1        | 0,81 | Yes |
| ENSMUSG00000074064 | 1,18E-01  | 4,276481586  | 1,99E+00  | 1,59E-01 | 5,06E-01 | Mlycd         | 1,08 | No  |
| ENSMUSG00000074065 | 1,87E+00  | -3,033632735 | 1,36E+00  | 2,43E-01 | 5,50E-01 | Gm10617       | 3,66 | No  |
| ENSMUSG00000074071 | -8,04E-01 | 2,320297629  | 3,68E+01  | 1,34E-09 | 1,07E-07 | Fam169b       | 0,57 | Yes |
| ENSMUSG00000074088 | 7,05E-03  | 5,003629268  | 8,96E-03  | 9,25E-01 | 1,00E+00 | Snrnp40       | 1,00 | No  |
| ENSMUSG00000074092 | -2,39E-01 | 3,68596279   | 6,25E+00  | 1,24E-02 | 1,10E-01 | Gm6181        | 0,85 | No  |

|                    |           |              |           |          |          |               |      |     |
|--------------------|-----------|--------------|-----------|----------|----------|---------------|------|-----|
| ENSMUSG00000074093 | -1,83E-02 | 3,285476212  | 3,14E-02  | 8,59E-01 | 9,95E-01 | Svip          | 0,99 | No  |
| ENSMUSG00000074102 | 7,95E-03  | 5,778281123  | 1,41E-02  | 9,06E-01 | 1,00E+00 | Rbm15b        | 1,01 | No  |
| ENSMUSG00000074108 | -2,81E-01 | 3,27291008   | 7,19E+00  | 7,31E-03 | 7,41E-02 | Rpl10-ps2     | 0,82 | No  |
| ENSMUSG00000074111 | -5,51E-02 | -2,831986244 | 1,37E-03  | 9,71E-01 | 1,00E+00 | Mrgpra9       | 0,96 | No  |
| ENSMUSG00000074113 | 4,79E-02  | -2,963178421 | -8,19E-10 | 1,00E+00 | 1,00E+00 | Gm10629       | 1,03 | No  |
| ENSMUSG00000074115 | -1,87E+00 | -3,107637761 | 1,39E+00  | 2,38E-01 | 5,50E-01 | Saa1          | 0,27 | No  |
| ENSMUSG00000074121 | -2,69E+00 | -2,831970912 | 2,88E+00  | 8,99E-02 | 3,80E-01 | Ntf5          | 0,15 | No  |
| ENSMUSG00000074127 | 1,16E+00  | -2,514138736 | 1,31E+00  | 2,53E-01 | 5,50E-01 | Cmtm2a        | 2,24 | No  |
| ENSMUSG00000074129 | -7,62E-02 | 5,040219309  | 1,07E+00  | 3,02E-01 | 5,98E-01 | Rpl13a        | 0,95 | No  |
| ENSMUSG00000074136 | 1,24E-02  | 1,165712942  | 3,89E-03  | 9,50E-01 | 1,00E+00 | 4930513N10Rik | 1,01 | No  |
| ENSMUSG00000074141 | -6,98E-01 | 7,175262399  | 1,35E+02  | 2,95E-31 | 1,80E-28 | Il4i1         | 0,62 | Yes |
| ENSMUSG00000074146 | -3,75E-02 | 0,760830297  | 2,85E-02  | 8,66E-01 | 9,99E-01 | 4930579C12Rik | 0,97 | No  |
| ENSMUSG00000074149 | -4,01E-01 | 1,4421551    | 5,03E+00  | 2,49E-02 | 1,74E-01 | Gm10634       | 0,76 | No  |
| ENSMUSG00000074151 | -8,39E-02 | 6,233032929  | 1,73E+00  | 1,88E-01 | 5,50E-01 | Nlrc5         | 0,94 | No  |
| ENSMUSG00000074158 | -4,03E-02 | 1,360669794  | 4,79E-02  | 8,27E-01 | 9,75E-01 | Zfp976        | 0,97 | No  |
| ENSMUSG00000074164 | 2,29E+00  | -2,998039595 | 2,01E+00  | 1,56E-01 | 5,01E-01 | Vmn2r-ps54    | 4,91 | No  |
| ENSMUSG00000074165 | -1,04E-01 | 3,468618814  | 1,08E+00  | 2,98E-01 | 5,94E-01 | Zfp788        | 0,93 | No  |
| ENSMUSG00000074166 | -2,96E-01 | 3,036519038  | 7,17E+00  | 7,43E-03 | 7,49E-02 | AW146154      | 0,81 | No  |
| ENSMUSG00000074170 | 1,37E-01  | 3,272315799  | 1,77E+00  | 1,84E-01 | 5,47E-01 | Plekhf1       | 1,10 | No  |
| ENSMUSG00000074171 | -9,85E-01 | -0,816305159 | 6,17E+00  | 1,30E-02 | 1,13E-01 | Gm6658        | 0,51 | No  |
| ENSMUSG00000074178 | 2,03E-01  | -1,697398857 | 1,05E-01  | 7,45E-01 | 9,29E-01 | Gm10638       | 1,15 | No  |
| ENSMUSG00000074182 | 7,44E-02  | 2,447063229  | 3,27E-01  | 5,67E-01 | 8,29E-01 | Znhit6        | 1,05 | No  |
| ENSMUSG00000074183 | 2,64E+00  | -3,033673223 | 2,69E+00  | 1,01E-01 | 3,92E-01 | Gsta1         | 6,23 | No  |
| ENSMUSG00000074184 | 3,14E-02  | -3,107617333 | -7,69E-10 | 1,00E+00 | 1,00E+00 | Smt3h2-ps2    | 1,02 | No  |
| ENSMUSG00000074194 | 1,33E+00  | -1,33323684  | 5,16E+00  | 2,31E-02 | 1,66E-01 | Zfp791        | 2,51 | No  |
| ENSMUSG00000074196 | -2,71E+00 | -3,033620915 | 2,92E+00  | 8,75E-02 | 3,78E-01 | Clca4c-ps     | 0,15 | No  |
| ENSMUSG00000074203 | 5,40E-01  | 1,238311454  | 7,64E+00  | 5,71E-03 | 6,17E-02 | G430095P16Rik | 1,45 | No  |
| ENSMUSG00000074207 | -4,85E-01 | -2,896130679 | 1,19E-01  | 7,31E-01 | 9,21E-01 | Adh1          | 0,71 | No  |
| ENSMUSG00000074210 | -3,79E-01 | 2,987578511  | 1,16E+01  | 6,76E-04 | 1,17E-02 | E130208F15Rik | 0,77 | Yes |
| ENSMUSG00000074211 | -3,81E-01 | 3,661583109  | 1,65E+01  | 4,95E-05 | 1,35E-03 | Sdhaf1        | 0,77 | Yes |
| ENSMUSG00000074212 | 1,66E-01  | 7,051898455  | 7,51E+00  | 6,15E-03 | 6,53E-02 | Dnajb14       | 1,12 | No  |
| ENSMUSG00000074213 | 2,23E-01  | 2,507881378  | 3,03E+00  | 8,18E-02 | 3,67E-01 | Gm10642       | 1,17 | No  |



|                    |           |              |          |          |          |               |      |     |
|--------------------|-----------|--------------|----------|----------|----------|---------------|------|-----|
| ENSMUSG00000074215 | 1,94E-01  | -0,778164668 | 2,16E-01 | 6,42E-01 | 8,71E-01 | Gm10643       | 1,14 | No  |
| ENSMUSG00000074217 | 3,13E-01  | -1,165785716 | 4,43E-01 | 5,06E-01 | 7,90E-01 | 2210011C24Rik | 1,24 | No  |
| ENSMUSG00000074218 | 1,32E-01  | 0,167870883  | 2,25E-01 | 6,35E-01 | 8,67E-01 | Cox7a1        | 1,10 | No  |
| ENSMUSG00000074219 | 1,37E-01  | -0,740852096 | 1,09E-01 | 7,41E-01 | 9,27E-01 | Gm10644       | 1,10 | No  |
| ENSMUSG00000074220 | 2,61E-01  | 3,33088392   | 6,21E+00 | 1,27E-02 | 1,11E-01 | Zfp382        | 1,20 | No  |
| ENSMUSG00000074221 | 1,02E-01  | 5,797375739  | 2,34E+00 | 1,26E-01 | 4,44E-01 | Zfp568        | 1,07 | No  |
| ENSMUSG00000074224 | -1,87E+00 | -3,107637761 | 1,39E+00 | 2,38E-01 | 5,50E-01 | 4932431P20Rik | 0,27 | No  |
| ENSMUSG00000074227 | -6,98E-01 | 5,092142887  | 9,23E+01 | 7,30E-22 | 2,01E-19 | Spint2        | 0,62 | Yes |
| ENSMUSG00000074228 | 3,34E-01  | 2,974986486  | 8,39E+00 | 3,77E-03 | 4,53E-02 | Gm10645       | 1,26 | Yes |
| ENSMUSG00000074232 | -3,05E-01 | -2,268115507 | 1,39E-01 | 7,09E-01 | 9,09E-01 | Gm10647       | 0,81 | No  |
| ENSMUSG00000074236 | -6,92E-03 | 3,701359924  | 5,38E-03 | 9,42E-01 | 1,00E+00 | Gm9387        | 1,00 | No  |
| ENSMUSG00000074238 | 8,34E-02  | 5,314972173  | 1,40E+00 | 2,37E-01 | 5,50E-01 | Ap1ar         | 1,06 | No  |
| ENSMUSG00000074240 | -4,86E-01 | -0,980695198 | 1,39E+00 | 2,38E-01 | 5,50E-01 | Cib3          | 0,71 | No  |
| ENSMUSG00000074243 | -1,95E-01 | 3,494953947  | 3,86E+00 | 4,93E-02 | 2,68E-01 | Gm10651       | 0,87 | No  |
| ENSMUSG00000074247 | 1,31E-02  | 5,921131502  | 3,93E-02 | 8,43E-01 | 9,85E-01 | Dda1          | 1,01 | No  |
| ENSMUSG00000074248 | 1,89E+00  | -3,033614598 | 1,38E+00 | 2,40E-01 | 5,50E-01 | 4930432M17Rik | 3,70 | No  |
| ENSMUSG00000074250 | -3,39E-02 | 2,132076502  | 5,45E-02 | 8,15E-01 | 9,69E-01 | Gm10653       | 0,98 | No  |
| ENSMUSG00000074252 | 1,56E-01  | 0,979803875  | 5,05E-01 | 4,77E-01 | 7,65E-01 | Gm10654       | 1,11 | No  |
| ENSMUSG00000074254 | -1,34E+00 | -2,896147326 | 1,12E+00 | 2,89E-01 | 5,85E-01 | Cyp2a4        | 0,39 | No  |
| ENSMUSG00000074256 | -6,34E-01 | -2,107603829 | 7,81E-01 | 3,77E-01 | 6,78E-01 | Gm10655       | 0,64 | No  |
| ENSMUSG00000074259 | -4,63E-01 | 2,28704397   | 1,22E+01 | 4,83E-04 | 8,92E-03 | Gramd2        | 0,73 | Yes |
| ENSMUSG00000074264 | -6,11E-02 | 0,001912162  | 4,24E-02 | 8,37E-01 | 9,81E-01 | Amy1          | 0,96 | No  |
| ENSMUSG00000074269 | 2,37E-01  | 2,036358579  | 2,41E+00 | 1,21E-01 | 4,33E-01 | Rec114        | 1,18 | No  |
| ENSMUSG00000074272 | -1,68E-01 | 5,816831062  | 6,32E+00 | 1,19E-02 | 1,06E-01 | Ceacam1       | 0,89 | No  |
| ENSMUSG00000074274 | -4,13E-02 | -3,033659495 | 7,08E-04 | 9,79E-01 | 1,00E+00 | D930028M14Rik | 0,97 | No  |
| ENSMUSG00000074277 | 1,26E-01  | 1,217911259  | 4,31E-01 | 5,11E-01 | 7,94E-01 | Phldb3        | 1,09 | No  |
| ENSMUSG00000074280 | -1,93E-01 | 8,429614777  | 1,13E+01 | 7,84E-04 | 1,32E-02 | Gm6166        | 0,87 | Yes |
| ENSMUSG00000074281 | -4,91E-01 | -2,015665257 | 4,15E-01 | 5,20E-01 | 7,99E-01 | Gm12522       | 0,71 | No  |
| ENSMUSG00000074282 | 6,85E-01  | 0,621325951  | 8,63E+00 | 3,31E-03 | 4,13E-02 | Zfp94         | 1,61 | Yes |
| ENSMUSG00000074283 | 7,38E-02  | 1,607012778  | 2,02E-01 | 6,53E-01 | 8,78E-01 | Zfp109        | 1,05 | No  |
| ENSMUSG00000074284 | -3,70E-01 | 2,303734681  | 7,46E+00 | 6,32E-03 | 6,67E-02 | Gm10658       | 0,77 | No  |
| ENSMUSG00000074292 | -1,89E+00 | -3,1076441   | 1,42E+00 | 2,33E-01 | 5,50E-01 | Gm10660       | 0,27 | No  |

|                    |           |              |           |          |          |               |      |     |
|--------------------|-----------|--------------|-----------|----------|----------|---------------|------|-----|
| ENSMUSG00000074305 | -3,30E-01 | 5,745644984  | 2,44E+01  | 7,94E-07 | 3,62E-05 | Peak1         | 0,80 | Yes |
| ENSMUSG00000074340 | -1,49E-01 | -0,233010272 | 2,18E-01  | 6,40E-01 | 8,70E-01 | Ovgp1         | 0,90 | No  |
| ENSMUSG00000074342 | 7,95E-02  | 4,965973764  | 1,14E+00  | 2,85E-01 | 5,82E-01 | I830077J02Rik | 1,06 | No  |
| ENSMUSG00000074344 | 1,48E-01  | 2,402859585  | 1,23E+00  | 2,68E-01 | 5,64E-01 | Tmigd3        | 1,11 | No  |
| ENSMUSG00000074345 | 6,78E-01  | 5,033150228  | 8,32E+01  | 7,27E-20 | 1,61E-17 | Tnfai8l3      | 1,60 | Yes |
| ENSMUSG00000074354 | 2,34E-01  | 0,358729848  | 8,33E-01  | 3,61E-01 | 6,63E-01 | Arhgap20os    | 1,18 | No  |
| ENSMUSG00000074355 | -2,21E-01 | 1,578559406  | 1,72E+00  | 1,90E-01 | 5,50E-01 | Gm10676       | 0,86 | No  |
| ENSMUSG00000074357 | -5,81E-01 | -0,748123553 | 2,06E+00  | 1,51E-01 | 4,93E-01 | AA386476      | 0,67 | No  |
| ENSMUSG00000074358 | 5,74E-02  | 3,221052063  | 2,93E-01  | 5,88E-01 | 8,41E-01 | Ccdc61        | 1,04 | No  |
| ENSMUSG00000074359 | -3,83E-02 | -3,107651936 | -7,91E-11 | 1,00E+00 | 1,00E+00 | Psg23         | 0,97 | No  |
| ENSMUSG00000074361 | 4,41E-01  | 1,273137152  | 5,12E+00  | 2,36E-02 | 1,68E-01 | C5ar2         | 1,36 | No  |
| ENSMUSG00000074364 | -1,55E+00 | -2,107605586 | 3,46E+00  | 6,29E-02 | 3,13E-01 | Ehd2          | 0,34 | No  |
| ENSMUSG00000074365 | -1,38E+00 | -1,378244054 | 6,90E+00  | 8,61E-03 | 8,36E-02 | Crxos         | 0,38 | No  |
| ENSMUSG00000074373 | -1,23E+00 | -3,146117124 | 7,12E-01  | 3,99E-01 | 6,98E-01 | Gm10680       | 0,42 | No  |
| ENSMUSG00000074384 | 4,89E-01  | -0,561154575 | 1,88E+00  | 1,71E-01 | 5,26E-01 | AI429214      | 1,40 | No  |
| ENSMUSG00000074385 | -2,17E-01 | 4,451978238  | 7,27E+00  | 7,01E-03 | 7,19E-02 | Gm10684       | 0,86 | No  |
| ENSMUSG00000074388 | -4,71E-01 | -1,574226725 | 7,71E-01  | 3,80E-01 | 6,81E-01 | Gm5544        | 0,72 | No  |
| ENSMUSG00000074397 | -6,01E-01 | -2,18570088  | 4,92E-01  | 4,83E-01 | 7,70E-01 | Foxr1         | 0,66 | No  |
| ENSMUSG00000074398 | 3,98E-04  | 6,193498327  | 3,82E-05  | 9,95E-01 | 1,00E+00 | Gm15441       | 1,00 | No  |
| ENSMUSG00000074403 | 1,95E-02  | -1,963243766 | 7,33E-04  | 9,78E-01 | 1,00E+00 | Hist2h3b      | 1,01 | No  |
| ENSMUSG00000074405 | -6,29E-02 | 5,064130588  | 7,42E-01  | 3,89E-01 | 6,89E-01 | Zfp865        | 0,96 | No  |
| ENSMUSG00000074406 | -3,29E-02 | 4,406682713  | 1,58E-01  | 6,91E-01 | 9,00E-01 | Zfp628        | 0,98 | No  |
| ENSMUSG00000074412 | -2,26E-01 | 1,17820702   | 1,33E+00  | 2,48E-01 | 5,50E-01 | Gm10689       | 0,85 | No  |
| ENSMUSG00000074415 | -4,39E-01 | -2,655033231 | 1,96E-01  | 6,58E-01 | 8,81E-01 | 2610203C20Rik | 0,74 | No  |
| ENSMUSG00000074417 | 2,45E-01  | 5,790283995  | 1,34E+01  | 2,52E-04 | 5,27E-03 | Gm14548       | 1,19 | Yes |
| ENSMUSG00000074418 | 2,25E-01  | 1,046986145  | 1,26E+00  | 2,61E-01 | 5,55E-01 | Gm15930       | 1,17 | No  |
| ENSMUSG00000074419 | 4,81E-02  | 4,306027131  | 3,37E-01  | 5,62E-01 | 8,25E-01 | Gm15448       | 1,03 | No  |
| ENSMUSG00000074420 | 1,81E-01  | 1,494020748  | 1,01E+00  | 3,15E-01 | 6,15E-01 | Gm10693       | 1,13 | No  |
| ENSMUSG00000074424 | -3,83E-02 | -3,107651936 | -7,91E-11 | 1,00E+00 | 1,00E+00 | Gm10696       | 0,97 | No  |
| ENSMUSG00000074449 | 7,67E-01  | -2,963261668 | 3,24E-01  | 5,69E-01 | 8,30E-01 | Gm15319       | 1,70 | No  |
| ENSMUSG00000074452 | -4,91E-01 | -1,322143982 | 9,09E-01  | 3,40E-01 | 6,41E-01 | Pate2         | 0,71 | No  |
| ENSMUSG00000074457 | -8,47E-01 | -2,831940177 | 3,94E-01  | 5,30E-01 | 8,05E-01 | S100a16       | 0,56 | No  |

|                    |           |              |           |          |          |               |      |     |
|--------------------|-----------|--------------|-----------|----------|----------|---------------|------|-----|
| ENSMUSG00000074461 | -1,90E+00 | -3,033594154 | 1,44E+00  | 2,30E-01 | 5,50E-01 | Gm10699       | 0,27 | No  |
| ENSMUSG00000074465 | 1,42E+00  | -1,574284917 | 6,84E+00  | 8,93E-03 | 8,58E-02 | Gm10701       | 2,67 | No  |
| ENSMUSG00000074466 | 3,76E-01  | 1,420916667  | 4,20E+00  | 4,04E-02 | 2,38E-01 | Gm15417       | 1,30 | No  |
| ENSMUSG00000074467 | 3,63E-01  | -2,574216556 | 1,18E-01  | 7,31E-01 | 9,21E-01 | Gm10702       | 1,29 | No  |
| ENSMUSG00000074472 | -1,43E+00 | -0,634193624 | 1,61E+01  | 6,01E-05 | 1,58E-03 | Zfp872        | 0,37 | Yes |
| ENSMUSG00000074476 | 1,74E-02  | 3,595949476  | 3,24E-02  | 8,57E-01 | 9,94E-01 | Spc24         | 1,01 | No  |
| ENSMUSG00000074479 | -1,64E-01 | 6,111807871  | 6,41E+00  | 1,13E-02 | 1,02E-01 | Gm10704       | 0,89 | No  |
| ENSMUSG00000074480 | -4,73E-01 | -0,879874463 | 1,55E+00  | 2,13E-01 | 5,50E-01 | Mex3a         | 0,72 | No  |
| ENSMUSG00000074482 | 1,49E-02  | 4,532572748  | 3,45E-02  | 8,53E-01 | 9,91E-01 | Gm16589       | 1,01 | No  |
| ENSMUSG00000074483 | -3,18E+00 | -2,655092806 | 4,26E+00  | 3,90E-02 | 2,34E-01 | Bglap         | 0,11 | No  |
| ENSMUSG00000074485 | 3,71E-01  | -1,863762564 | 3,33E-01  | 5,64E-01 | 8,26E-01 | Gm7381        | 1,29 | No  |
| ENSMUSG00000074486 | -5,24E-02 | -2,963245194 | 1,25E-03  | 9,72E-01 | 1,00E+00 | Bglap2        | 0,96 | No  |
| ENSMUSG00000074489 | 3,14E-02  | -3,107617333 | -7,69E-10 | 1,00E+00 | 1,00E+00 | Bglap3        | 1,02 | No  |
| ENSMUSG00000074491 | 6,33E-01  | -1,366826168 | 1,48E+00  | 2,24E-01 | 5,50E-01 | Clec4g        | 1,55 | No  |
| ENSMUSG00000074497 | 2,17E-01  | 1,152051475  | 1,23E+00  | 2,68E-01 | 5,65E-01 | A430078G23Rik | 1,16 | No  |
| ENSMUSG00000074500 | -1,37E-01 | -0,079634321 | 2,13E-01  | 6,44E-01 | 8,73E-01 | Zfp558        | 0,91 | No  |
| ENSMUSG00000074501 | -1,94E+00 | -3,107619243 | 1,50E+00  | 2,21E-01 | 5,50E-01 | Gm5612        | 0,26 | No  |
| ENSMUSG00000074502 | -3,83E-02 | -3,107651936 | -7,91E-11 | 1,00E+00 | 1,00E+00 | Ubtfl1        | 0,97 | No  |
| ENSMUSG00000074505 | 1,23E+00  | 2,247549397  | 6,73E+01  | 2,37E-16 | 4,13E-14 | Fat3          | 2,35 | Yes |
| ENSMUSG00000074506 | -1,55E-01 | 5,330809937  | 4,78E+00  | 2,88E-02 | 1,93E-01 | Gm10705       | 0,90 | No  |
| ENSMUSG00000074508 | -4,42E+00 | -2,333198126 | 1,07E+01  | 1,06E-03 | 1,70E-02 | Gm10706       | 0,05 | Yes |
| ENSMUSG00000074513 | 1,41E-01  | 4,825043035  | 3,44E+00  | 6,37E-02 | 3,15E-01 | Arfp1         | 1,10 | No  |
| ENSMUSG00000074516 | -2,64E-01 | 6,234751646  | 1,69E+01  | 3,91E-05 | 1,10E-03 | Gm10709       | 0,83 | Yes |
| ENSMUSG00000074519 | -1,37E-01 | 3,638126402  | 2,08E+00  | 1,50E-01 | 4,91E-01 | Zfp971        | 0,91 | No  |
| ENSMUSG00000074521 | 1,15E-01  | -0,0200711   | 1,55E-01  | 6,94E-01 | 9,02E-01 | Gm14327       | 1,08 | No  |
| ENSMUSG00000074527 | 3,38E-01  | 2,048105398  | 5,18E+00  | 2,28E-02 | 1,65E-01 | Gm14296       | 1,26 | No  |
| ENSMUSG00000074529 | -2,16E-01 | -0,662118302 | 3,43E-01  | 5,58E-01 | 8,22E-01 | Zfp972        | 0,86 | No  |
| ENSMUSG00000074547 | -1,22E-01 | 4,774803781  | 2,54E+00  | 1,11E-01 | 4,08E-01 | Rps8-ps4      | 0,92 | No  |
| ENSMUSG00000074553 | -1,49E-01 | 4,218950375  | 3,09E+00  | 7,90E-02 | 3,60E-01 | Eif1-ps1      | 0,90 | No  |
| ENSMUSG00000074555 | 5,92E-01  | -2,65518408  | 3,89E-01  | 5,33E-01 | 8,06E-01 | Gm10714       | 1,51 | No  |
| ENSMUSG00000074564 | 7,63E-01  | -2,896140274 | 3,18E-01  | 5,73E-01 | 8,32E-01 | Gm10720       | 1,70 | No  |
| ENSMUSG00000074569 | -2,83E-01 | -0,190721013 | 8,52E-01  | 3,56E-01 | 6,57E-01 | Gcnt7         | 0,82 | No  |

|                    |           |              |          |          |          |               |      |     |
|--------------------|-----------|--------------|----------|----------|----------|---------------|------|-----|
| ENSMUSG00000074570 | -1,51E-01 | 5,529302392  | 4,63E+00 | 3,14E-02 | 2,05E-01 | Cass4         | 0,90 | No  |
| ENSMUSG00000074575 | -9,43E-01 | -2,711697975 | 7,78E-01 | 3,78E-01 | 6,78E-01 | Kcng1         | 0,52 | No  |
| ENSMUSG00000074576 | 1,12E-01  | 3,026717908  | 1,01E+00 | 3,16E-01 | 6,16E-01 | Mocs3         | 1,08 | No  |
| ENSMUSG00000074577 | -9,57E-01 | -0,655105255 | 6,33E+00 | 1,18E-02 | 1,06E-01 | Ripor3        | 0,52 | No  |
| ENSMUSG00000074578 | -4,98E-01 | 3,26026481   | 2,22E+01 | 2,44E-06 | 9,67E-05 | Zfas1         | 0,71 | Yes |
| ENSMUSG00000074579 | -2,96E-01 | 0,496750594  | 1,40E+00 | 2,37E-01 | 5,50E-01 | Lekr1         | 0,81 | No  |
| ENSMUSG00000074580 | -3,84E-02 | 2,97232466   | 1,10E-01 | 7,40E-01 | 9,26E-01 | 4931440P22Rik | 0,97 | No  |
| ENSMUSG00000074582 | 4,44E-02  | 6,822352565  | 5,23E-01 | 4,70E-01 | 7,58E-01 | Arfgef2       | 1,03 | No  |
| ENSMUSG00000074591 | -8,86E-02 | -2,963249454 | 3,57E-03 | 9,52E-01 | 1,00E+00 | Ankub1        | 0,94 | No  |
| ENSMUSG00000074594 | -7,88E-02 | -2,89616692  | 4,36E-03 | 9,47E-01 | 1,00E+00 | Wfdc9         | 0,95 | No  |
| ENSMUSG00000074603 | 6,23E-01  | -1,998031529 | 7,87E-01 | 3,75E-01 | 6,76E-01 | Gm10729       | 1,54 | No  |
| ENSMUSG00000074604 | 4,19E-01  | 2,589114002  | 1,06E+01 | 1,10E-03 | 1,75E-02 | Mgst2         | 1,34 | Yes |
| ENSMUSG00000074607 | -3,65E-01 | -1,401372859 | 5,87E-01 | 4,44E-01 | 7,35E-01 | Tox2          | 0,78 | No  |
| ENSMUSG00000074619 | -7,13E-02 | -1,627680916 | 1,66E-02 | 8,97E-01 | 1,00E+00 | 1700034I23Rik | 0,95 | No  |
| ENSMUSG00000074620 | -1,87E+00 | -3,033619006 | 1,41E+00 | 2,36E-01 | 5,50E-01 | Gm10731       | 0,27 | No  |
| ENSMUSG00000074622 | 4,54E-01  | 6,659191049  | 5,24E+01 | 4,55E-13 | 5,78E-11 | Mafb          | 1,37 | Yes |
| ENSMUSG00000074623 | 1,82E-01  | -1,497591875 | 1,00E-01 | 7,52E-01 | 9,32E-01 | Gm826         | 1,13 | No  |
| ENSMUSG00000074627 | 2,58E-01  | 1,202721677  | 1,70E+00 | 1,92E-01 | 5,50E-01 | Mroh8         | 1,20 | No  |
| ENSMUSG00000074628 | 5,00E-01  | -1,627730406 | 7,74E-01 | 3,79E-01 | 6,80E-01 | Tldc2         | 1,41 | No  |
| ENSMUSG00000074629 | 1,92E-01  | -0,436708893 | 3,36E-01 | 5,62E-01 | 8,25E-01 | 4930518I15Rik | 1,14 | No  |
| ENSMUSG00000074634 | 1,80E-01  | 2,867318961  | 2,40E+00 | 1,21E-01 | 4,34E-01 | Tmem267       | 1,13 | No  |
| ENSMUSG00000074635 | -1,68E-01 | -0,929198874 | 1,61E-01 | 6,89E-01 | 8,98E-01 | 3110070M22Rik | 0,89 | No  |
| ENSMUSG00000074643 | 4,79E-02  | 5,056041276  | 4,30E-01 | 5,12E-01 | 7,95E-01 | Cpne1         | 1,03 | No  |
| ENSMUSG00000074646 | 2,02E-01  | 2,682403126  | 2,71E+00 | 9,94E-02 | 3,92E-01 | 6430550D23Rik | 1,15 | No  |
| ENSMUSG00000074647 | -6,62E-01 | -1,448615974 | 1,56E+00 | 2,12E-01 | 5,50E-01 | Fam83c        | 0,63 | No  |
| ENSMUSG00000074649 | 2,53E-02  | 4,621312577  | 1,03E-01 | 7,49E-01 | 9,30E-01 | BC029722      | 1,02 | No  |
| ENSMUSG00000074651 | 3,12E+00  | -2,83205733  | 3,98E+00 | 4,60E-02 | 2,56E-01 | Mcidas        | 8,72 | No  |
| ENSMUSG00000074652 | 2,20E-02  | 0,010779819  | 5,77E-03 | 9,39E-01 | 1,00E+00 | Myh7b         | 1,02 | No  |
| ENSMUSG00000074653 | -2,65E+00 | -3,033633091 | 2,78E+00 | 9,55E-02 | 3,86E-01 | Lrrc31        | 0,16 | No  |
| ENSMUSG00000074656 | -7,57E-02 | 5,673524727  | 1,24E+00 | 2,66E-01 | 5,61E-01 | Eif2s2        | 0,95 | No  |
| ENSMUSG00000074657 | 1,70E-01  | 2,651304375  | 1,98E+00 | 1,59E-01 | 5,06E-01 | Kif5a         | 1,12 | No  |
| ENSMUSG00000074664 | 1,84E+00  | -3,033661615 | 1,33E+00 | 2,48E-01 | 5,50E-01 | A830092H15Rik | 3,58 | No  |

|                    |           |              |           |          |          |               |      |     |
|--------------------|-----------|--------------|-----------|----------|----------|---------------|------|-----|
| ENSMUSG00000074671 | 4,90E-02  | 3,210272869  | 2,18E-01  | 6,40E-01 | 8,70E-01 | Tspyl3        | 1,03 | No  |
| ENSMUSG00000074673 | -8,63E-02 | -2,070194068 | 1,20E-02  | 9,13E-01 | 1,00E+00 | Ttll9         | 0,94 | No  |
| ENSMUSG00000074677 | 5,34E-01  | 5,244071341  | 5,43E+01  | 1,70E-13 | 2,27E-11 | Sirpb1c       | 1,45 | Yes |
| ENSMUSG00000074680 | 1,84E+00  | -3,033649193 | 1,33E+00  | 2,49E-01 | 5,50E-01 | Defb26        | 3,58 | No  |
| ENSMUSG00000074682 | -1,96E-01 | 2,57079295   | 2,36E+00  | 1,24E-01 | 4,41E-01 | Zcchc3        | 0,87 | No  |
| ENSMUSG00000074695 | -2,68E+00 | -2,963261035 | 2,84E+00  | 9,17E-02 | 3,82E-01 | Il22          | 0,16 | No  |
| ENSMUSG00000074698 | -1,27E-01 | 6,398603547  | 4,05E+00  | 4,41E-02 | 2,50E-01 | Csnk2a1       | 0,92 | No  |
| ENSMUSG00000074704 | 1,19E+00  | -1,800981744 | 3,44E+00  | 6,38E-02 | 3,16E-01 | Rad21l        | 2,28 | No  |
| ENSMUSG00000074715 | -7,10E-02 | -2,6551508   | 4,60E-03  | 9,46E-01 | 1,00E+00 | Ccl28         | 0,95 | No  |
| ENSMUSG00000074731 | 8,87E-01  | -2,268098875 | 1,21E+00  | 2,71E-01 | 5,68E-01 | Zfp345        | 1,85 | No  |
| ENSMUSG00000074733 | -7,90E-02 | 4,023410562  | 8,22E-01  | 3,65E-01 | 6,66E-01 | Zfp950        | 0,95 | No  |
| ENSMUSG00000074734 | -2,49E-02 | -3,146121042 | -4,44E-11 | 1,00E+00 | 1,00E+00 | 4933416C03Rik | 0,98 | No  |
| ENSMUSG00000074735 | 5,57E-01  | -0,413215671 | 2,84E+00  | 9,20E-02 | 3,82E-01 | Gm21994       | 1,47 | No  |
| ENSMUSG00000074738 | 5,07E-02  | 2,509408131  | 1,52E-01  | 6,96E-01 | 9,03E-01 | Fndc10        | 1,04 | No  |
| ENSMUSG00000074743 | 5,20E-01  | 2,023240104  | 1,18E+01  | 5,97E-04 | 1,06E-02 | Thbd          | 1,43 | Yes |
| ENSMUSG00000074746 | -7,56E-03 | 6,379575565  | 1,42E-02  | 9,05E-01 | 1,00E+00 | Pdzd8         | 0,99 | No  |
| ENSMUSG00000074748 | -1,18E-02 | 6,272418709  | 3,42E-02  | 8,53E-01 | 9,91E-01 | Atxn7l3b      | 0,99 | No  |
| ENSMUSG00000074749 | -7,33E-02 | 2,817105561  | 3,93E-01  | 5,30E-01 | 8,05E-01 | Kiz           | 0,95 | No  |
| ENSMUSG00000074754 | -1,91E-01 | 1,986806185  | 1,58E+00  | 2,08E-01 | 5,50E-01 | Smim26        | 0,88 | No  |
| ENSMUSG00000074758 | 7,49E-01  | -1,448747098 | 1,70E+00  | 1,92E-01 | 5,50E-01 | Gm5535        | 1,68 | No  |
| ENSMUSG00000074763 | 1,81E+00  | -3,10765737  | 1,28E+00  | 2,58E-01 | 5,50E-01 | MacroD2os2    | 3,49 | No  |
| ENSMUSG00000074768 | 1,87E+00  | -3,107639691 | 1,38E+00  | 2,40E-01 | 5,50E-01 | Bhmt          | 3,67 | No  |
| ENSMUSG00000074780 | 4,25E-02  | 3,558363429  | 1,87E-01  | 6,66E-01 | 8,85E-01 | Anapc15-ps    | 1,03 | No  |
| ENSMUSG00000074781 | 3,98E-02  | 5,736528986  | 3,49E-01  | 5,55E-01 | 8,20E-01 | Ube2n         | 1,03 | No  |
| ENSMUSG00000074782 | -4,48E-03 | -1,448725155 | 6,31E-05  | 9,94E-01 | 1,00E+00 | 4833422C13Rik | 1,00 | No  |
| ENSMUSG00000074783 | -1,37E+00 | -2,146017442 | 2,59E+00  | 1,08E-01 | 4,02E-01 | AU019990      | 0,39 | No  |
| ENSMUSG00000074785 | -6,25E-02 | 7,82115973   | 1,14E+00  | 2,85E-01 | 5,82E-01 | Plxnc1        | 0,96 | No  |
| ENSMUSG00000074793 | 3,46E-01  | -0,55481914  | 8,70E-01  | 3,51E-01 | 6,52E-01 | Hspa12b       | 1,27 | No  |
| ENSMUSG00000074794 | 1,50E-02  | 5,590023709  | 4,80E-02  | 8,27E-01 | 9,75E-01 | Arrdc3        | 1,01 | No  |
| ENSMUSG00000074796 | -2,32E-02 | 2,514319792  | 3,21E-02  | 8,58E-01 | 9,94E-01 | Slc4a11       | 0,98 | No  |
| ENSMUSG00000074797 | 7,50E-02  | 4,022134316  | 7,22E-01  | 3,95E-01 | 6,96E-01 | Itpa          | 1,05 | No  |
| ENSMUSG00000074800 | -1,80E-01 | 7,812381871  | 9,43E+00  | 2,14E-03 | 2,94E-02 | Gm4149        | 0,88 | Yes |

|                    |           |              |           |          |          |               |      |     |
|--------------------|-----------|--------------|-----------|----------|----------|---------------|------|-----|
| ENSMUSG00000074802 | 4,43E-01  | 6,180146989  | 4,70E+01  | 7,13E-12 | 7,69E-10 | Gas2l3        | 1,36 | Yes |
| ENSMUSG00000074804 | -9,56E-01 | -2,711709022 | 8,00E-01  | 3,71E-01 | 6,72E-01 | AU015228      | 0,52 | No  |
| ENSMUSG00000074805 | -3,78E-01 | -1,006693149 | 7,22E-01  | 3,95E-01 | 6,96E-01 | Il1bos        | 0,77 | No  |
| ENSMUSG00000074807 | 3,07E-01  | 0,520664618  | 1,56E+00  | 2,12E-01 | 5,50E-01 | Gm10762       | 1,24 | No  |
| ENSMUSG00000074811 | -1,21E-02 | 4,395436092  | 2,18E-02  | 8,83E-01 | 1,00E+00 | Hps6          | 0,99 | No  |
| ENSMUSG00000074812 | 7,16E-01  | -2,896139042 | 2,79E-01  | 5,97E-01 | 8,45E-01 | Spdye4c       | 1,64 | No  |
| ENSMUSG00000074813 | 2,62E-01  | 3,127892302  | 5,37E+00  | 2,05E-02 | 1,54E-01 | Gm14005       | 1,20 | No  |
| ENSMUSG00000074817 | 1,18E-01  | 1,995157616  | 6,09E-01  | 4,35E-01 | 7,28E-01 | Papalb        | 1,08 | No  |
| ENSMUSG00000074818 | 1,53E-01  | -0,126790857 | 2,45E-01  | 6,21E-01 | 8,57E-01 | Pdzd7         | 1,11 | No  |
| ENSMUSG00000074824 | 9,35E-01  | -0,438984632 | 7,43E+00  | 6,42E-03 | 6,74E-02 | Rslcan18      | 1,91 | No  |
| ENSMUSG00000074825 | 2,35E-01  | 5,114234539  | 1,06E+01  | 1,13E-03 | 1,79E-02 | Itpripl1      | 1,18 | Yes |
| ENSMUSG00000074826 | -8,97E-02 | 0,952554152  | 1,77E-01  | 6,74E-01 | 8,90E-01 | Gm10767       | 0,94 | No  |
| ENSMUSG00000074829 | -1,17E-01 | 4,032475694  | 1,79E+00  | 1,81E-01 | 5,42E-01 | 2010315B03Rik | 0,92 | No  |
| ENSMUSG00000074841 | 3,14E-02  | -3,107617333 | -7,69E-10 | 1,00E+00 | 1,00E+00 | Cbx3-ps1      | 1,02 | No  |
| ENSMUSG00000074846 | 1,13E-01  | 3,563332657  | 1,31E+00  | 2,53E-01 | 5,50E-01 | Gm10774       | 1,08 | No  |
| ENSMUSG00000074847 | -5,72E-01 | -2,831971956 | 2,57E-01  | 6,12E-01 | 8,52E-01 | Gm10775       | 0,67 | No  |
| ENSMUSG00000074852 | -4,13E-02 | -3,033659495 | 7,08E-04  | 9,79E-01 | 1,00E+00 | Hpse2         | 0,97 | No  |
| ENSMUSG00000074862 | -7,63E-02 | -0,065523754 | 6,48E-02  | 7,99E-01 | 9,60E-01 | BC025920      | 0,95 | No  |
| ENSMUSG00000074863 | 1,71E-01  | 3,443924149  | 3,01E+00  | 8,30E-02 | 3,70E-01 | Platr25       | 1,13 | No  |
| ENSMUSG00000074865 | 1,01E-01  | 2,705508631  | 6,97E-01  | 4,04E-01 | 7,01E-01 | Zfp934        | 1,07 | No  |
| ENSMUSG00000074867 | 2,67E-01  | 1,473616989  | 2,28E+00  | 1,31E-01 | 4,55E-01 | Zfp808        | 1,20 | No  |
| ENSMUSG00000074868 | -8,18E-02 | 1,11014883   | 1,72E-01  | 6,78E-01 | 8,92E-01 | Gm6478        | 0,94 | No  |
| ENSMUSG00000074873 | 1,04E-01  | 2,932305107  | 8,13E-01  | 3,67E-01 | 6,68E-01 | Al606181      | 1,07 | No  |
| ENSMUSG00000074874 | 3,09E-01  | 0,795911878  | 1,92E+00  | 1,65E-01 | 5,18E-01 | Ctla2b        | 1,24 | No  |
| ENSMUSG00000074876 | 3,15E-01  | 3,140324934  | 8,24E+00  | 4,11E-03 | 4,82E-02 | Spata5l1      | 1,24 | Yes |
| ENSMUSG00000074881 | -5,90E-01 | -2,497581264 | 3,74E-01  | 5,41E-01 | 8,11E-01 | Mageb3        | 0,66 | No  |
| ENSMUSG00000074884 | -3,39E-02 | 7,098736686  | 3,16E-01  | 5,74E-01 | 8,33E-01 | Serf2         | 0,98 | No  |
| ENSMUSG00000074885 | -7,38E-02 | -3,033659033 | 2,66E-03  | 9,59E-01 | 1,00E+00 | Gm10782       | 0,95 | No  |
| ENSMUSG00000074886 | -5,81E-02 | 6,190420547  | 8,15E-01  | 3,67E-01 | 6,68E-01 | Grk6          | 0,96 | No  |
| ENSMUSG00000074887 | -1,87E+00 | -3,107637761 | 1,39E+00  | 2,38E-01 | 5,50E-01 | EU599041      | 0,27 | No  |
| ENSMUSG00000074890 | 8,17E-02  | 3,319573574  | 6,11E-01  | 4,34E-01 | 7,27E-01 | Lcmt2         | 1,06 | No  |
| ENSMUSG00000074892 | 7,47E-01  | -2,146070568 | 9,97E-01  | 3,18E-01 | 6,19E-01 | B3galt5       | 1,68 | No  |

|                    |           |              |           |          |          |               |      |     |
|--------------------|-----------|--------------|-----------|----------|----------|---------------|------|-----|
| ENSMUSG00000074896 | -3,49E-01 | 1,770600774  | 4,98E+00  | 2,57E-02 | 1,78E-01 | lfit3         | 0,79 | No  |
| ENSMUSG00000074899 | -1,92E-01 | 1,36018635   | 9,11E-01  | 3,40E-01 | 6,41E-01 | Sptbn5        | 0,88 | No  |
| ENSMUSG00000074903 | -6,27E-02 | 2,363229721  | 2,17E-01  | 6,42E-01 | 8,71E-01 | Gm2058        | 0,96 | No  |
| ENSMUSG00000074909 | -3,63E-02 | 4,331074391  | 1,92E-01  | 6,61E-01 | 8,82E-01 | Ranbp6        | 0,98 | No  |
| ENSMUSG00000074912 | -1,20E+00 | -1,863536666 | 2,87E+00  | 9,00E-02 | 3,80E-01 | Gm14207       | 0,44 | No  |
| ENSMUSG00000074916 | -7,77E-02 | 3,834815477  | 7,19E-01  | 3,97E-01 | 6,97E-01 | Chst14        | 0,95 | No  |
| ENSMUSG00000074918 | -3,14E-02 | 4,449906426  | 1,49E-01  | 6,99E-01 | 9,04E-01 | Inafm2        | 0,98 | No  |
| ENSMUSG00000074922 | 1,07E-01  | 3,438754895  | 1,13E+00  | 2,88E-01 | 5,84E-01 | Fam122a       | 1,08 | No  |
| ENSMUSG00000074923 | -3,09E-01 | -0,155680921 | 9,62E-01  | 3,27E-01 | 6,28E-01 | Pak6          | 0,81 | No  |
| ENSMUSG00000074925 | 2,12E-01  | 2,838483219  | 3,20E+00  | 7,36E-02 | 3,45E-01 | Ptar1         | 1,16 | No  |
| ENSMUSG00000074930 | 6,60E-01  | -1,355742889 | 1,42E+00  | 2,33E-01 | 5,50E-01 | Gm13981       | 1,58 | No  |
| ENSMUSG00000074934 | -4,66E-01 | -1,740843968 | 5,78E-01  | 4,47E-01 | 7,37E-01 | Grem1         | 0,72 | No  |
| ENSMUSG00000074939 | 7,06E-01  | -2,832018779 | 2,72E-01  | 6,02E-01 | 8,48E-01 | Chrm5         | 1,63 | No  |
| ENSMUSG00000074955 | 1,87E+00  | -3,107639691 | 1,38E+00  | 2,40E-01 | 5,50E-01 | Olf1305       | 3,67 | No  |
| ENSMUSG00000074968 | -8,45E-01 | -2,963241229 | 3,92E-01  | 5,31E-01 | 8,05E-01 | Ano3          | 0,56 | No  |
| ENSMUSG00000074978 | -1,06E-01 | 5,040654777  | 2,08E+00  | 1,49E-01 | 4,90E-01 | Actg-ps1      | 0,93 | No  |
| ENSMUSG00000074987 | -1,89E+00 | -3,1076441   | 1,42E+00  | 2,33E-01 | 5,50E-01 | Wt1os         | 0,27 | No  |
| ENSMUSG00000074994 | -6,02E-02 | 5,253867339  | 7,24E-01  | 3,95E-01 | 6,95E-01 | Qser1         | 0,96 | No  |
| ENSMUSG00000074997 | -5,17E-04 | 2,238425092  | 1,41E-05  | 9,97E-01 | 1,00E+00 | Pin1rt1       | 1,00 | No  |
| ENSMUSG00000074999 | -4,95E-01 | 0,187840918  | 2,91E+00  | 8,79E-02 | 3,79E-01 | Gm10797       | 0,71 | No  |
| ENSMUSG00000075000 | -7,93E-02 | 4,328774258  | 9,20E-01  | 3,38E-01 | 6,38E-01 | Nrbf2         | 0,95 | No  |
| ENSMUSG00000075010 | -8,36E-01 | 6,214277545  | 1,69E+02  | 1,06E-38 | 1,18E-35 | AW112010      | 0,56 | Yes |
| ENSMUSG00000075012 | 2,72E-01  | -2,497577868 | 7,51E-02  | 7,84E-01 | 9,51E-01 | Fjx1          | 1,21 | No  |
| ENSMUSG00000075014 | 2,70E-01  | 0,56366804   | 1,43E+00  | 2,32E-01 | 5,50E-01 | Gm10800       | 1,21 | No  |
| ENSMUSG00000075015 | 2,68E-01  | -2,355555165 | 9,05E-02  | 7,64E-01 | 9,39E-01 | Gm10801       | 1,20 | No  |
| ENSMUSG00000075020 | 9,01E-03  | -3,107646452 | -5,16E-10 | 1,00E+00 | 1,00E+00 | Mir670hg      | 1,01 | No  |
| ENSMUSG00000075023 | 2,62E+00  | -3,033654625 | 2,66E+00  | 1,03E-01 | 3,95E-01 | Accsl         | 6,16 | No  |
| ENSMUSG00000075025 | -2,52E-01 | -1,333268932 | 2,52E-01  | 6,16E-01 | 8,54E-01 | Gm10804       | 0,84 | No  |
| ENSMUSG00000075027 | -4,44E-01 | -1,963165853 | 3,63E-01  | 5,47E-01 | 8,14E-01 | 4631405J19Rik | 0,74 | No  |
| ENSMUSG00000075028 | -1,07E-01 | 2,665324602  | 7,83E-01  | 3,76E-01 | 6,77E-01 | Prdm11        | 0,93 | No  |
| ENSMUSG00000075029 | 4,35E-05  | -2,318609281 | 3,92E-09  | 1,00E+00 | 1,00E+00 | 4930558J22Rik | 1,00 | No  |
| ENSMUSG00000075031 | 5,51E-02  | -1,107673378 | 1,30E-02  | 9,09E-01 | 1,00E+00 | Hist1h2bb     | 1,04 | No  |

|                    |           |              |          |          |          |               |      |     |
|--------------------|-----------|--------------|----------|----------|----------|---------------|------|-----|
| ENSMUSG00000075033 | -8,39E-02 | 0,638370497  | 1,34E-01 | 7,14E-01 | 9,12E-01 | Nxpe3         | 0,94 | No  |
| ENSMUSG00000075036 | -7,21E-02 | -2,832041172 | 3,55E-03 | 9,52E-01 | 1,00E+00 | Gm10805       | 0,95 | No  |
| ENSMUSG00000075040 | -1,53E-01 | 4,797170299  | 3,99E+00 | 4,56E-02 | 2,55E-01 | Zfp408        | 0,90 | No  |
| ENSMUSG00000075042 | 6,90E-01  | -2,226342    | 6,90E-01 | 4,06E-01 | 7,02E-01 | 4930431P03Rik | 1,61 | No  |
| ENSMUSG00000075044 | -1,87E+00 | -3,107637761 | 1,39E+00 | 2,38E-01 | 5,50E-01 | Slc22a29      | 0,27 | No  |
| ENSMUSG00000075053 | 6,66E-02  | 6,052410261  | 1,04E+00 | 3,07E-01 | 6,05E-01 | Vdac3-ps1     | 1,05 | No  |
| ENSMUSG00000075054 | 1,26E-01  | 2,311838502  | 8,71E-01 | 3,51E-01 | 6,52E-01 | Yae1d1        | 1,09 | No  |
| ENSMUSG00000075061 | 1,87E+00  | -3,107639691 | 1,38E+00 | 2,40E-01 | 5,50E-01 | Olfr1272      | 3,67 | No  |
| ENSMUSG00000075065 | -1,31E+00 | -2,03371007  | 3,59E+00 | 5,80E-02 | 2,97E-01 | Olfr1270      | 0,40 | No  |
| ENSMUSG00000075069 | 1,87E+00  | -3,107639691 | 1,38E+00 | 2,40E-01 | 5,50E-01 | Olfr1264      | 3,67 | No  |
| ENSMUSG00000075122 | -4,42E-01 | 6,577245624  | 5,00E+01 | 1,56E-12 | 1,88E-10 | Cd80          | 0,74 | Yes |
| ENSMUSG00000075162 | 2,36E-01  | 0,047992418  | 6,29E-01 | 4,28E-01 | 7,22E-01 | Gm10812       | 1,18 | No  |
| ENSMUSG00000075184 | 1,17E+00  | -1,655282729 | 3,78E+00 | 5,20E-02 | 2,78E-01 | F930017D23Rik | 2,24 | No  |
| ENSMUSG00000075224 | -1,87E+00 | -3,107637761 | 1,39E+00 | 2,38E-01 | 5,50E-01 | Lrrc55        | 0,27 | No  |
| ENSMUSG00000075225 | -6,45E-01 | 1,013130939  | 1,07E+01 | 1,06E-03 | 1,69E-02 | Ccdc162       | 0,64 | Yes |
| ENSMUSG00000075227 | 8,56E-02  | 4,667120549  | 1,20E+00 | 2,74E-01 | 5,71E-01 | Znhit2        | 1,06 | No  |
| ENSMUSG00000075229 | 8,71E-02  | 2,880204444  | 5,51E-01 | 4,58E-01 | 7,47E-01 | Ccdc58        | 1,06 | No  |
| ENSMUSG00000075232 | 2,12E-01  | 5,071446685  | 8,41E+00 | 3,72E-03 | 4,48E-02 | Amd1          | 1,16 | Yes |
| ENSMUSG00000075245 | -6,73E-01 | -0,879731266 | 2,60E+00 | 1,07E-01 | 4,01E-01 | Gm6043        | 0,63 | No  |
| ENSMUSG00000075254 | 1,37E-01  | 4,802913451  | 3,25E+00 | 7,16E-02 | 3,39E-01 | Heg1          | 1,10 | No  |
| ENSMUSG00000075256 | -4,40E-01 | 3,465951293  | 1,95E+01 | 1,01E-05 | 3,41E-04 | Cerkl         | 0,74 | Yes |
| ENSMUSG00000075265 | -1,21E+00 | -2,600669775 | 1,66E+00 | 1,98E-01 | 5,50E-01 | Tnk2os        | 0,43 | No  |
| ENSMUSG00000075266 | -1,41E-01 | 2,292582487  | 1,04E+00 | 3,09E-01 | 6,07E-01 | Cenpw         | 0,91 | No  |
| ENSMUSG00000075267 | -3,15E-01 | -1,574129194 | 2,78E-01 | 5,98E-01 | 8,45E-01 | Dfnb59        | 0,80 | No  |
| ENSMUSG00000075268 | 1,07E-01  | 4,935800154  | 2,03E+00 | 1,54E-01 | 4,97E-01 | Gm10819       | 1,08 | No  |
| ENSMUSG00000075269 | 1,68E-01  | 2,680296561  | 1,80E+00 | 1,79E-01 | 5,40E-01 | Bex6          | 1,12 | No  |
| ENSMUSG00000075270 | 2,13E-01  | -1,627706738 | 1,63E-01 | 6,86E-01 | 8,97E-01 | Pde11a        | 1,16 | No  |
| ENSMUSG00000075271 | 2,27E-01  | 1,706574039  | 2,01E+00 | 1,56E-01 | 5,01E-01 | Ttc30a1       | 1,17 | No  |
| ENSMUSG00000075272 | 9,80E-02  | -0,436747634 | 7,36E-02 | 7,86E-01 | 9,52E-01 | Ttc30a2       | 1,07 | No  |
| ENSMUSG00000075273 | 9,87E-02  | 1,813356331  | 3,75E-01 | 5,40E-01 | 8,10E-01 | Ttc30b        | 1,07 | No  |
| ENSMUSG00000075276 | -4,13E-02 | 1,704871442  | 6,29E-02 | 8,02E-01 | 9,61E-01 | Gm13653       | 0,97 | No  |
| ENSMUSG00000075279 | -1,46E-02 | 4,446442693  | 3,24E-02 | 8,57E-01 | 9,94E-01 | Mrpl23-ps1    | 0,99 | No  |



|                    |           |              |           |          |          |               |      |     |
|--------------------|-----------|--------------|-----------|----------|----------|---------------|------|-----|
| ENSMUSG00000075284 | -4,11E-04 | 7,760762019  | 4,91E-05  | 9,94E-01 | 1,00E+00 | Wipf1         | 1,00 | No  |
| ENSMUSG00000075286 | -2,65E+00 | -3,033633091 | 2,78E+00  | 9,55E-02 | 3,86E-01 | Gm1968        | 0,16 | No  |
| ENSMUSG00000075289 | -2,80E-01 | 2,680850292  | 5,32E+00  | 2,11E-02 | 1,57E-01 | Carns1        | 0,82 | No  |
| ENSMUSG00000075296 | 1,85E+00  | -3,107657832 | 1,35E+00  | 2,46E-01 | 5,50E-01 | Aldh3b2       | 3,61 | No  |
| ENSMUSG00000075297 | -2,27E-02 | -0,097952744 | 5,63E-03  | 9,40E-01 | 1,00E+00 | H60b          | 0,98 | No  |
| ENSMUSG00000075304 | -1,86E+00 | -3,033612668 | 1,39E+00  | 2,38E-01 | 5,50E-01 | Sp5           | 0,28 | No  |
| ENSMUSG00000075307 | -6,22E-02 | -2,655111106 | 2,61E-03  | 9,59E-01 | 1,00E+00 | Klhl41        | 0,96 | No  |
| ENSMUSG00000075312 | -1,11E-01 | 4,949030473  | 2,22E+00  | 1,36E-01 | 4,65E-01 | Gm13597       | 0,93 | No  |
| ENSMUSG00000075316 | -1,98E-01 | -1,702240106 | 9,93E-02  | 7,53E-01 | 9,33E-01 | Scn9a         | 0,87 | No  |
| ENSMUSG00000075318 | 1,77E+00  | -2,268128223 | 3,61E+00  | 5,75E-02 | 2,95E-01 | Scn2a         | 3,40 | No  |
| ENSMUSG00000075325 | 1,21E-02  | -3,033650469 | 7,34E-11  | 1,00E+00 | 1,00E+00 | Gm13582       | 1,01 | No  |
| ENSMUSG00000075327 | 3,02E-03  | 4,50807584   | 1,42E-03  | 9,70E-01 | 1,00E+00 | Zbtb2         | 1,00 | No  |
| ENSMUSG00000075334 | -2,45E-01 | -1,268059685 | 2,39E-01  | 6,25E-01 | 8,59E-01 | Rprm          | 0,84 | No  |
| ENSMUSG00000075370 | 3,14E-02  | -3,107617333 | -7,69E-10 | 1,00E+00 | 1,00E+00 | Igll1         | 1,02 | No  |
| ENSMUSG00000075376 | 1,43E-02  | 5,59440484   | 4,43E-02  | 8,33E-01 | 9,79E-01 | Rc3h2         | 1,01 | No  |
| ENSMUSG00000075389 | 2,42E-01  | -2,311129433 | 7,34E-02  | 7,86E-01 | 9,52E-01 | 2810410L24Rik | 1,18 | No  |
| ENSMUSG00000075391 | 8,80E-02  | 4,185001208  | 1,05E+00  | 3,05E-01 | 6,01E-01 | Gm13443       | 1,06 | No  |
| ENSMUSG00000075402 | -1,13E-01 | -2,963254935 | 5,86E-03  | 9,39E-01 | 1,00E+00 | Krt76         | 0,92 | No  |
| ENSMUSG00000075405 | 1,64E+00  | -2,963261751 | 1,31E+00  | 2,52E-01 | 5,50E-01 | 9430097D07Rik | 3,11 | No  |
| ENSMUSG00000075408 | -1,64E-01 | -2,378253246 | 3,86E-02  | 8,44E-01 | 9,86E-01 | 6030408B16Rik | 0,89 | No  |
| ENSMUSG00000075410 | -6,19E-01 | -1,980485984 | 5,22E-01  | 4,70E-01 | 7,58E-01 | Prcd          | 0,65 | No  |
| ENSMUSG00000075415 | -2,92E-01 | 8,640634302  | 2,59E+01  | 3,51E-07 | 1,73E-05 | Fnbp1         | 0,82 | Yes |
| ENSMUSG00000075416 | 4,45E-01  | -2,600656537 | 1,54E-01  | 6,94E-01 | 9,02E-01 | Gm14488       | 1,36 | No  |
| ENSMUSG00000075419 | 1,05E-01  | 4,018602814  | 1,40E+00  | 2,37E-01 | 5,50E-01 | Dolk          | 1,08 | No  |
| ENSMUSG00000075420 | 2,36E-01  | 0,302553744  | 8,57E-01  | 3,55E-01 | 6,56E-01 | Smim6         | 1,18 | No  |
| ENSMUSG00000075425 | 1,30E-01  | -2,289458305 | 3,14E-02  | 8,59E-01 | 9,95E-01 | Gm13547       | 1,09 | No  |
| ENSMUSG00000075463 | -3,83E-01 | -0,36118905  | 1,18E+00  | 2,77E-01 | 5,74E-01 | 4930594M22Rik | 0,77 | No  |
| ENSMUSG00000075467 | -1,72E-02 | 4,940076524  | 5,29E-02  | 8,18E-01 | 9,70E-01 | Dnlz          | 0,99 | No  |
| ENSMUSG00000075469 | -3,83E-02 | -3,107651936 | -7,91E-11 | 1,00E+00 | 1,00E+00 | Gm17205       | 0,97 | No  |
| ENSMUSG00000075470 | 9,97E-03  | 6,109313355  | 2,37E-02  | 8,78E-01 | 1,00E+00 | Alg10b        | 1,01 | No  |
| ENSMUSG00000075480 | -6,43E-01 | -2,711680239 | 2,76E-01  | 5,99E-01 | 8,46E-01 | Gm10840       | 0,64 | No  |
| ENSMUSG00000075485 | 1,81E+00  | -3,10765737  | 1,28E+00  | 2,58E-01 | 5,50E-01 | Gm10842       | 3,49 | No  |

|                    |           |              |          |          |          |               |      |     |
|--------------------|-----------|--------------|----------|----------|----------|---------------|------|-----|
| ENSMUSG00000075486 | -2,52E-02 | 4,646693848  | 1,04E-01 | 7,47E-01 | 9,30E-01 | Commd6        | 0,98 | No  |
| ENSMUSG00000075502 | 6,02E-01  | 0,977515645  | 8,32E+00 | 3,91E-03 | 4,66E-02 | Kbtbd6        | 1,52 | Yes |
| ENSMUSG00000075511 | 1,01E-01  | 1,907315471  | 4,23E-01 | 5,16E-01 | 7,97E-01 | 1700001L05Rik | 1,07 | No  |
| ENSMUSG00000075514 | 2,03E-01  | 1,319930444  | 1,20E+00 | 2,74E-01 | 5,71E-01 | Gm13375       | 1,15 | No  |
| ENSMUSG00000075520 | 6,22E-01  | -2,31107493  | 4,31E-01 | 5,11E-01 | 7,94E-01 | Malrd1        | 1,54 | No  |
| ENSMUSG00000075525 | 1,04E+00  | -2,963280965 | 4,69E-01 | 4,94E-01 | 7,79E-01 | Gm10849       | 2,06 | No  |
| ENSMUSG00000075528 | 9,97E-02  | 2,959294389  | 7,96E-01 | 3,72E-01 | 6,74E-01 | Aarsd1        | 1,07 | No  |
| ENSMUSG00000075534 | 7,56E-01  | -2,800966083 | 3,11E-01 | 5,77E-01 | 8,35E-01 | Gm13262       | 1,69 | No  |
| ENSMUSG00000075552 | 1,87E+00  | -3,107639691 | 1,38E+00 | 2,40E-01 | 5,50E-01 | Cyp3a41b      | 3,67 | No  |
| ENSMUSG00000075553 | -6,80E-01 | -2,165716449 | 7,08E-01 | 4,00E-01 | 6,99E-01 | Gm5464        | 0,62 | No  |
| ENSMUSG00000075555 | 3,13E-01  | 0,539033456  | 1,74E+00 | 1,87E-01 | 5,50E-01 | Gm10863       | 1,24 | No  |
| ENSMUSG00000075558 | -3,53E+00 | -2,831972902 | 5,58E+00 | 1,81E-02 | 1,42E-01 | Gm17151       | 0,09 | No  |
| ENSMUSG00000075569 | 5,56E-02  | -1,493441327 | 1,14E-02 | 9,15E-01 | 1,00E+00 | Rsph10b       | 1,04 | No  |
| ENSMUSG00000075571 | -7,38E-02 | -3,033659033 | 2,66E-03 | 9,59E-01 | 1,00E+00 | Defb30        | 0,95 | No  |
| ENSMUSG00000075573 | -1,89E+00 | -3,1076441   | 1,42E+00 | 2,33E-01 | 5,50E-01 | Defb47        | 0,27 | No  |
| ENSMUSG00000075574 | -1,90E+00 | -3,033594154 | 1,44E+00 | 2,30E-01 | 5,50E-01 | Defb48        | 0,27 | No  |
| ENSMUSG00000075576 | 6,76E-02  | 2,440637228  | 2,64E-01 | 6,07E-01 | 8,50E-01 | Gm12359       | 1,05 | No  |
| ENSMUSG00000075581 | -1,95E-01 | 5,651670049  | 8,23E+00 | 4,12E-03 | 4,84E-02 | Gm16409       | 0,87 | Yes |
| ENSMUSG00000075585 | -1,12E-01 | 2,626912856  | 8,20E-01 | 3,65E-01 | 6,66E-01 | 6330403L08Rik | 0,93 | No  |
| ENSMUSG00000075587 | -5,82E-01 | -2,770624831 | 2,66E-01 | 6,06E-01 | 8,49E-01 | Gm11531       | 0,67 | No  |
| ENSMUSG00000075588 | -1,90E+00 | -3,107628502 | 1,44E+00 | 2,29E-01 | 5,50E-01 | Hoxb2         | 0,27 | No  |
| ENSMUSG00000075589 | -8,83E-02 | -2,770632657 | 5,28E-03 | 9,42E-01 | 1,00E+00 | Gm11536       | 0,94 | No  |
| ENSMUSG00000075590 | 6,52E-01  | -0,522916013 | 3,02E+00 | 8,24E-02 | 3,69E-01 | Nrbp2         | 1,57 | No  |
| ENSMUSG00000075591 | -1,42E-01 | 5,359613583  | 4,09E+00 | 4,32E-02 | 2,47E-01 | Gm10874       | 0,91 | No  |
| ENSMUSG00000075592 | 1,58E-01  | 0,399257798  | 3,70E-01 | 5,43E-01 | 8,12E-01 | Nynrin        | 1,12 | No  |
| ENSMUSG00000075593 | 3,36E-01  | -0,673595902 | 8,40E-01 | 3,59E-01 | 6,61E-01 | Gal3st4       | 1,26 | No  |
| ENSMUSG00000075595 | 2,10E-01  | 6,822096428  | 1,17E+01 | 6,10E-04 | 1,08E-02 | Zfp652        | 1,16 | Yes |
| ENSMUSG00000075596 | -1,05E+00 | -0,573969932 | 6,42E+00 | 1,13E-02 | 1,02E-01 | B130006D01Rik | 0,48 | No  |
| ENSMUSG00000075600 | 2,20E-01  | 3,699109059  | 5,36E+00 | 2,06E-02 | 1,54E-01 | Zc3h3         | 1,16 | No  |
| ENSMUSG00000075602 | -6,13E-01 | 2,980749693  | 2,83E+01 | 1,02E-07 | 5,67E-06 | Ly6a          | 0,65 | Yes |
| ENSMUSG00000075609 | 1,68E-01  | 5,577393302  | 5,94E+00 | 1,48E-02 | 1,25E-01 | Gm7935        | 1,12 | No  |
| ENSMUSG00000075611 | 6,38E-01  | 2,335861615  | 2,09E+01 | 4,90E-06 | 1,77E-04 | Gm11545       | 1,56 | Yes |

|                    |           |              |           |          |          |          |      |     |
|--------------------|-----------|--------------|-----------|----------|----------|----------|------|-----|
| ENSMUSG00000075700 | 1,97E-01  | 7,882249397  | 1,13E+01  | 7,57E-04 | 1,29E-02 | Selenot  | 1,15 | Yes |
| ENSMUSG00000075701 | 2,50E-02  | 5,789600087  | 1,40E-01  | 7,09E-01 | 9,09E-01 | Selenos  | 1,02 | No  |
| ENSMUSG00000075702 | -3,10E-01 | 1,416328915  | 2,82E+00  | 9,30E-02 | 3,83E-01 | Selenom  | 0,81 | No  |
| ENSMUSG00000075703 | 2,31E-01  | 5,259595131  | 1,06E+01  | 1,16E-03 | 1,83E-02 | Selenoi  | 1,17 | Yes |
| ENSMUSG00000075704 | 2,07E-01  | 3,544104705  | 4,35E+00  | 3,71E-02 | 2,29E-01 | Txnrd2   | 1,15 | No  |
| ENSMUSG00000075705 | 2,24E-02  | 7,96826769   | 1,48E-01  | 7,01E-01 | 9,05E-01 | Msrb1    | 1,02 | No  |
| ENSMUSG00000075706 | -5,70E-02 | 5,059121962  | 6,06E-01  | 4,36E-01 | 7,29E-01 | Gpx4     | 0,96 | No  |
| ENSMUSG00000075770 | 1,80E-01  | -0,472964648 | 2,38E-01  | 6,26E-01 | 8,60E-01 | Gm22589  | 1,13 | No  |
| ENSMUSG00000075826 | 3,14E-02  | -3,107617333 | -7,69E-10 | 1,00E+00 | 1,00E+00 | Gm23691  | 1,02 | No  |
| ENSMUSG00000075829 | -1,89E+00 | -3,1076441   | 1,42E+00  | 2,33E-01 | 5,50E-01 | Gm23692  | 0,27 | No  |
| ENSMUSG00000075837 | 5,02E-01  | -1,997988307 | 4,87E-01  | 4,85E-01 | 7,72E-01 | Gm22005  | 1,42 | No  |
| ENSMUSG00000075903 | 8,58E-01  | -2,548282979 | 8,86E-01  | 3,47E-01 | 6,47E-01 | Gm23941  | 1,81 | No  |
| ENSMUSG00000075908 | -1,86E+00 | -3,033612668 | 1,39E+00  | 2,38E-01 | 5,50E-01 | Gm23940  | 0,28 | No  |
| ENSMUSG00000076009 | -2,20E-02 | -3,107641896 | 1,16E-04  | 9,91E-01 | 1,00E+00 | Mir688   | 0,98 | No  |
| ENSMUSG00000076012 | 5,69E-02  | 1,576556573  | 1,11E-01  | 7,39E-01 | 9,26E-01 | Mir705   | 1,04 | No  |
| ENSMUSG00000076031 | 2,36E-02  | 2,811768367  | 3,92E-02  | 8,43E-01 | 9,85E-01 | Gm22751  | 1,02 | No  |
| ENSMUSG00000076033 | 8,65E-02  | 7,680376894  | 2,15E+00  | 1,42E-01 | 4,77E-01 | Mir692-3 | 1,06 | No  |
| ENSMUSG00000076036 | 1,01E-01  | 9,54973279   | 3,17E+00  | 7,52E-02 | 3,49E-01 | Gm22133  | 1,07 | No  |
| ENSMUSG00000076038 | 5,67E-02  | 6,867616703  | 8,55E-01  | 3,55E-01 | 6,56E-01 | Gm22774  | 1,04 | No  |
| ENSMUSG00000076051 | 6,58E-01  | -2,289491197 | 5,55E-01  | 4,56E-01 | 7,46E-01 | Mir707   | 1,58 | No  |
| ENSMUSG00000076060 | 2,14E-01  | 2,45473794   | 2,58E+00  | 1,08E-01 | 4,03E-01 | Mir704   | 1,16 | No  |
| ENSMUSG00000076062 | -1,34E-01 | -2,094763402 | 3,00E-02  | 8,63E-01 | 9,97E-01 | Mir92-1  | 0,91 | No  |
| ENSMUSG00000076068 | -2,31E-02 | 0,464549054  | 8,87E-03  | 9,25E-01 | 1,00E+00 | Mir678   | 0,98 | No  |
| ENSMUSG00000076119 | -2,54E+00 | -2,68312013  | 3,92E+00  | 4,76E-02 | 2,61E-01 | Mir698   | 0,17 | No  |
| ENSMUSG00000076121 | -7,57E-01 | -2,448652175 | 6,42E-01  | 4,23E-01 | 7,18E-01 | Mir687   | 0,59 | No  |
| ENSMUSG00000076123 | 7,44E-01  | -0,19589721  | 4,99E+00  | 2,55E-02 | 1,77E-01 | Mir700   | 1,68 | No  |
| ENSMUSG00000076128 | 2,93E-02  | 3,645425135  | 9,14E-02  | 7,62E-01 | 9,38E-01 | Mir686   | 1,02 | No  |
| ENSMUSG00000076129 | -3,27E-01 | -2,088767788 | 2,29E-01  | 6,32E-01 | 8,64E-01 | Gm22920  | 0,80 | No  |
| ENSMUSG00000076135 | -1,91E-01 | -2,226309059 | 5,25E-02  | 8,19E-01 | 9,71E-01 | Gm24276  | 0,88 | No  |
| ENSMUSG00000076136 | -9,41E-01 | -1,522494595 | 2,48E+00  | 1,15E-01 | 4,20E-01 | Gm24951  | 0,52 | No  |
| ENSMUSG00000076137 | 1,25E-01  | 2,668859016  | 1,03E+00  | 3,10E-01 | 6,09E-01 | Gm26384  | 1,09 | No  |
| ENSMUSG00000076138 | -1,58E-01 | 7,68105669   | 7,23E+00  | 7,19E-03 | 7,33E-02 | Gm26377  | 0,90 | No  |

|                    |           |              |           |          |          |          |      |     |
|--------------------|-----------|--------------|-----------|----------|----------|----------|------|-----|
| ENSMUSG00000076141 | -4,80E-02 | -2,896135597 | 1,06E-03  | 9,74E-01 | 1,00E+00 | Mir693   | 0,97 | No  |
| ENSMUSG00000076142 | 1,17E+00  | -3,14612376  | 6,40E-01  | 4,24E-01 | 7,18E-01 | Mir711   | 2,26 | No  |
| ENSMUSG00000076144 | -6,33E-01 | -2,311077812 | 5,45E-01  | 4,60E-01 | 7,49E-01 | Mir709   | 0,64 | No  |
| ENSMUSG00000076163 | -3,83E-02 | -3,107651936 | -7,91E-11 | 1,00E+00 | 1,00E+00 | Mir701   | 0,97 | No  |
| ENSMUSG00000076212 | 9,01E-03  | -3,107646452 | -5,16E-10 | 1,00E+00 | 1,00E+00 | Mir680-1 | 1,01 | No  |
| ENSMUSG00000076216 | 3,17E+00  | -2,963263597 | 4,11E+00  | 4,28E-02 | 2,46E-01 | Mir695   | 8,99 | No  |
| ENSMUSG00000076218 | 3,69E-01  | -2,033663439 | 3,28E-01  | 5,67E-01 | 8,29E-01 | Mir692-1 | 1,29 | No  |
| ENSMUSG00000076228 | 2,83E-01  | -1,59641435  | 2,56E-01  | 6,13E-01 | 8,53E-01 | Gm25595  | 1,22 | No  |
| ENSMUSG00000076230 | -1,80E-01 | 0,745333394  | 6,50E-01  | 4,20E-01 | 7,16E-01 | Gm22758  | 0,88 | No  |
| ENSMUSG00000076231 | -3,27E-01 | -1,226142935 | 5,03E-01  | 4,78E-01 | 7,66E-01 | Gm22759  | 0,80 | No  |
| ENSMUSG00000076232 | 1,22E+00  | -3,146114919 | 6,90E-01  | 4,06E-01 | 7,02E-01 | Gm22760  | 2,33 | No  |
| ENSMUSG00000076236 | -1,43E-01 | 7,216682476  | 5,66E+00  | 1,74E-02 | 1,38E-01 | Mir682   | 0,91 | No  |
| ENSMUSG00000076237 | -6,61E-01 | -3,070161976 | 1,72E-01  | 6,78E-01 | 8,92E-01 | Gm26300  | 0,63 | No  |
| ENSMUSG00000076240 | 3,03E-01  | 1,484949882  | 3,01E+00  | 8,28E-02 | 3,70E-01 | Mir702   | 1,23 | No  |
| ENSMUSG00000076246 | 1,85E+00  | -3,107657832 | 1,35E+00  | 2,46E-01 | 5,50E-01 | Gm22256  | 3,61 | No  |
| ENSMUSG00000076252 | -2,63E-02 | -3,033653157 | 2,33E-04  | 9,88E-01 | 1,00E+00 | Mir302b  | 0,98 | No  |
| ENSMUSG00000076256 | -1,51E+00 | -2,627611361 | 1,50E+00  | 2,20E-01 | 5,50E-01 | Mir19b-1 | 0,35 | No  |
| ENSMUSG00000076258 | -5,67E-01 | 8,437934058  | 9,45E+01  | 2,41E-22 | 7,07E-20 | Gm23935  | 0,67 | Yes |
| ENSMUSG00000076270 | 9,69E-02  | 1,39681551   | 2,74E-01  | 6,00E-01 | 8,47E-01 | Mir719   | 1,07 | No  |
| ENSMUSG00000076271 | -9,81E-01 | -2,145996491 | 1,49E+00  | 2,23E-01 | 5,50E-01 | Mir697   | 0,51 | No  |
| ENSMUSG00000076281 | -6,94E-01 | 6,591668279  | 1,20E+02  | 7,70E-28 | 3,60E-25 | Gm24270  | 0,62 | Yes |
| ENSMUSG00000076284 | 1,85E+00  | -3,107657832 | 1,35E+00  | 2,46E-01 | 5,50E-01 | Gm24272  | 3,61 | No  |
| ENSMUSG00000076288 | 7,06E-01  | -2,896181546 | 2,71E-01  | 6,03E-01 | 8,48E-01 | Mir301b  | 1,63 | No  |
| ENSMUSG00000076300 | 1,81E+00  | -3,10765737  | 1,28E+00  | 2,58E-01 | 5,50E-01 | Gm23060  | 3,49 | No  |
| ENSMUSG00000076303 | 1,84E+00  | -3,033632273 | 1,33E+00  | 2,49E-01 | 5,50E-01 | Gm23061  | 3,58 | No  |
| ENSMUSG00000076304 | -2,66E+00 | -3,033639428 | 2,81E+00  | 9,35E-02 | 3,83E-01 | Gm23062  | 0,16 | No  |
| ENSMUSG00000076309 | 6,34E-02  | 6,10240796   | 9,48E-01  | 3,30E-01 | 6,31E-01 | Mir147   | 1,04 | No  |
| ENSMUSG00000076315 | 4,89E-01  | -0,946233064 | 1,31E+00  | 2,52E-01 | 5,50E-01 | Mir343   | 1,40 | No  |
| ENSMUSG00000076333 | -2,71E+00 | -2,863668034 | 2,90E+00  | 8,84E-02 | 3,79E-01 | Mir599   | 0,15 | No  |
| ENSMUSG00000076337 | -4,17E-02 | -2,963202678 | 7,92E-04  | 9,78E-01 | 1,00E+00 | Gm24714  | 0,97 | No  |
| ENSMUSG00000076338 | -1,89E+00 | -3,1076441   | 1,42E+00  | 2,33E-01 | 5,50E-01 | Mir181d  | 0,27 | No  |
| ENSMUSG00000076364 | -1,87E+00 | -3,107637761 | 1,39E+00  | 2,38E-01 | 5,50E-01 | Gm24049  | 0,27 | No  |

|                    |           |              |           |          |          |           |       |     |
|--------------------|-----------|--------------|-----------|----------|----------|-----------|-------|-----|
| ENSMUSG00000076370 | 1,87E+00  | -3,03364371  | 1,36E+00  | 2,43E-01 | 5,50E-01 | Gm22369   | 3,66  | No  |
| ENSMUSG00000076372 | 4,17E-01  | -2,333169735 | 2,07E-01  | 6,49E-01 | 8,75E-01 | Mir568    | 1,34  | No  |
| ENSMUSG00000076376 | -6,33E-01 | -1,57409235  | 1,24E+00  | 2,65E-01 | 5,60E-01 | Mir674    | 0,64  | No  |
| ENSMUSG00000076379 | -1,87E+00 | -3,107637761 | 1,39E+00  | 2,38E-01 | 5,50E-01 | Mir190a   | 0,27  | No  |
| ENSMUSG00000076382 | 1,82E+00  | -3,033667329 | 1,31E+00  | 2,52E-01 | 5,50E-01 | Gm23193   | 3,54  | No  |
| ENSMUSG00000076387 | -5,23E-02 | 1,195305346  | 7,20E-02  | 7,88E-01 | 9,54E-01 | Mir671    | 0,96  | No  |
| ENSMUSG00000076392 | 1,62E+00  | -2,711751167 | 1,79E+00  | 1,80E-01 | 5,42E-01 | Gm25992   | 3,07  | No  |
| ENSMUSG00000076424 | -3,20E+00 | -2,896154564 | 4,32E+00  | 3,77E-02 | 2,31E-01 | Gm25986   | 0,11  | No  |
| ENSMUSG00000076430 | 6,17E-01  | -1,863743489 | 9,94E-01  | 3,19E-01 | 6,19E-01 | Hus1b     | 1,53  | No  |
| ENSMUSG00000076431 | -4,99E-01 | 3,422190837  | 2,55E+01  | 4,35E-07 | 2,11E-05 | Sox4      | 0,71  | Yes |
| ENSMUSG00000076432 | -8,86E-02 | 6,240307294  | 1,92E+00  | 1,66E-01 | 5,18E-01 | Ywhaq     | 0,94  | No  |
| ENSMUSG00000076433 | 5,54E-01  | -1,05190487  | 1,68E+00  | 1,95E-01 | 5,50E-01 | Cep295nl  | 1,47  | No  |
| ENSMUSG00000076434 | 7,54E-01  | -2,896151836 | 3,10E-01  | 5,77E-01 | 8,35E-01 | Wfdc3     | 1,69  | No  |
| ENSMUSG00000076435 | 9,18E-02  | 2,395020888  | 4,65E-01  | 4,95E-01 | 7,81E-01 | Acsf2     | 1,07  | No  |
| ENSMUSG00000076436 | 4,73E-01  | -2,548255829 | 3,04E-01  | 5,81E-01 | 8,38E-01 | Oxct2a    | 1,39  | No  |
| ENSMUSG00000076437 | 8,10E-02  | 4,870047953  | 1,12E+00  | 2,90E-01 | 5,85E-01 | Selenoh   | 1,06  | No  |
| ENSMUSG00000076438 | -1,45E-02 | -3,107649194 | 3,72E-11  | 1,00E+00 | 1,00E+00 | Oxct2b    | 0,99  | No  |
| ENSMUSG00000076441 | 1,46E-01  | 5,123756448  | 4,07E+00  | 4,36E-02 | 2,49E-01 | Ass1      | 1,11  | No  |
| ENSMUSG00000076444 | 5,88E-01  | -1,311239065 | 1,36E+00  | 2,44E-01 | 5,50E-01 | Mir761    | 1,50  | No  |
| ENSMUSG00000076445 | -7,93E-02 | 3,32605489   | 5,83E-01  | 4,45E-01 | 7,36E-01 | Gm24865   | 0,95  | No  |
| ENSMUSG00000076454 | -1,85E-01 | 1,030764833  | 8,29E-01  | 3,63E-01 | 6,64E-01 | Mir762    | 0,88  | No  |
| ENSMUSG00000076456 | -2,22E+00 | -3,010026869 | 1,93E+00  | 1,65E-01 | 5,17E-01 | Mir760    | 0,21  | No  |
| ENSMUSG00000076460 | -1,98E-02 | -3,033655952 | 2,83E-11  | 1,00E+00 | 1,00E+00 | Mir744    | 0,99  | No  |
| ENSMUSG00000076461 | 3,52E+00  | -2,896164906 | 5,38E+00  | 2,03E-02 | 1,53E-01 | Trbv1     | 11,47 | No  |
| ENSMUSG00000076463 | 9,01E-03  | -3,107646452 | -5,16E-10 | 1,00E+00 | 1,00E+00 | Trbv3     | 1,01  | No  |
| ENSMUSG00000076465 | -1,22E+00 | -3,146113954 | 6,96E-01  | 4,04E-01 | 7,01E-01 | Trbv5     | 0,43  | No  |
| ENSMUSG00000076474 | 3,14E-02  | -3,107617333 | -7,69E-10 | 1,00E+00 | 1,00E+00 | Trbv17    | 1,02  | No  |
| ENSMUSG00000076476 | -1,89E+00 | -3,1076441   | 1,42E+00  | 2,33E-01 | 5,50E-01 | Trbv20    | 0,27  | No  |
| ENSMUSG00000076479 | -1,89E+00 | -3,1076441   | 1,42E+00  | 2,33E-01 | 5,50E-01 | Trbv26    | 0,27  | No  |
| ENSMUSG00000076490 | -1,87E+00 | -3,107637761 | 1,39E+00  | 2,38E-01 | 5,50E-01 | Trbc1     | 0,27  | No  |
| ENSMUSG00000076498 | -1,94E+00 | -3,107619243 | 1,50E+00  | 2,21E-01 | 5,50E-01 | Trbc2     | 0,26  | No  |
| ENSMUSG00000076501 | -1,20E+00 | -3,070140586 | 6,96E-01  | 4,04E-01 | 7,01E-01 | Igkv2-137 | 0,43  | No  |

|                    |           |              |           |          |          |            |       |     |
|--------------------|-----------|--------------|-----------|----------|----------|------------|-------|-----|
| ENSMUSG00000076508 | -1,89E+00 | -3,1076441   | 1,42E+00  | 2,33E-01 | 5,50E-01 | Igkv17-127 | 0,27  | No  |
| ENSMUSG00000076514 | -5,88E-02 | -3,033616507 | 1,62E-03  | 9,68E-01 | 1,00E+00 | Igkv17-121 | 0,96  | No  |
| ENSMUSG00000076523 | -1,87E+00 | -3,107637761 | 1,39E+00  | 2,38E-01 | 5,50E-01 | Igkv15-103 | 0,27  | No  |
| ENSMUSG00000076534 | -3,83E-02 | -3,107651936 | -7,91E-11 | 1,00E+00 | 1,00E+00 | Igkv12-89  | 0,97  | No  |
| ENSMUSG00000076536 | -1,14E-02 | -3,033635021 | 1,50E-05  | 9,97E-01 | 1,00E+00 | Igkv4-86   | 0,99  | No  |
| ENSMUSG00000076540 | -1,87E+00 | -3,107637761 | 1,39E+00  | 2,38E-01 | 5,50E-01 | Igkv4-80   | 0,27  | No  |
| ENSMUSG00000076545 | -3,54E+00 | -2,896134066 | 5,62E+00  | 1,77E-02 | 1,39E-01 | Igkv4-72   | 0,09  | No  |
| ENSMUSG00000076549 | 1,85E+00  | -3,107657832 | 1,35E+00  | 2,46E-01 | 5,50E-01 | Igkv4-68   | 3,61  | No  |
| ENSMUSG00000076555 | -5,88E-02 | -3,033616507 | 1,62E-03  | 9,68E-01 | 1,00E+00 | Igkv4-57-1 | 0,96  | No  |
| ENSMUSG00000076562 | -1,94E+00 | -3,107619243 | 1,50E+00  | 2,21E-01 | 5,50E-01 | Igkv4-50   | 0,26  | No  |
| ENSMUSG00000076569 | -3,26E+00 | -2,963184148 | 4,48E+00  | 3,43E-02 | 2,18E-01 | Igkv5-39   | 0,10  | No  |
| ENSMUSG00000076576 | 3,14E-02  | -3,107617333 | -7,69E-10 | 1,00E+00 | 1,00E+00 | Igkv6-32   | 1,02  | No  |
| ENSMUSG00000076577 | -2,65E+00 | -2,831983935 | 2,81E+00  | 9,39E-02 | 3,84E-01 | Igkv8-30   | 0,16  | No  |
| ENSMUSG00000076583 | -1,86E+00 | -3,033612668 | 1,39E+00  | 2,38E-01 | 5,50E-01 | Igkv8-24   | 0,28  | No  |
| ENSMUSG00000076586 | -1,94E+00 | -3,107619243 | 1,50E+00  | 2,21E-01 | 5,50E-01 | Igkv8-21   | 0,26  | No  |
| ENSMUSG00000076598 | -3,83E-02 | -3,107651936 | -7,91E-11 | 1,00E+00 | 1,00E+00 | Igkv3-7    | 0,97  | No  |
| ENSMUSG00000076608 | 2,06E-02  | -3,146103739 | -9,26E-10 | 1,00E+00 | 1,00E+00 | Igkj5      | 1,01  | No  |
| ENSMUSG00000076609 | -1,09E+00 | -0,704219365 | 7,40E+00  | 6,53E-03 | 6,82E-02 | Igkc       | 0,47  | No  |
| ENSMUSG00000076612 | 3,17E+00  | -2,896135869 | 4,11E+00  | 4,26E-02 | 2,46E-01 | Ighg2c     | 9,02  | No  |
| ENSMUSG00000076613 | 4,10E+00  | -2,711675753 | 8,25E+00  | 4,09E-03 | 4,81E-02 | Ighg2b     | 17,18 | Yes |
| ENSMUSG00000076614 | -4,84E+00 | -2,311162665 | 1,45E+01  | 1,43E-04 | 3,25E-03 | Ighg1      | 0,03  | Yes |
| ENSMUSG00000076615 | -1,24E+00 | -2,548190874 | 1,48E+00  | 2,24E-01 | 5,50E-01 | Ighg3      | 0,42  | No  |
| ENSMUSG00000076617 | -3,45E-02 | 4,077407162  | 1,55E-01  | 6,93E-01 | 9,01E-01 | Ighm       | 0,98  | No  |
| ENSMUSG00000076618 | -1,76E+00 | -2,831982231 | 2,17E+00  | 1,41E-01 | 4,74E-01 | Ighj4      | 0,29  | No  |
| ENSMUSG00000076619 | 3,14E-02  | -3,107617333 | -7,69E-10 | 1,00E+00 | 1,00E+00 | Ighj3      | 1,02  | No  |
| ENSMUSG00000076620 | -1,14E-02 | -3,033635021 | 1,50E-05  | 9,97E-01 | 1,00E+00 | Ighj2      | 0,99  | No  |
| ENSMUSG00000076621 | -5,88E-02 | -3,033616507 | 1,62E-03  | 9,68E-01 | 1,00E+00 | Ighj1      | 0,96  | No  |
| ENSMUSG00000076652 | -1,90E+00 | -3,033647263 | 1,44E+00  | 2,30E-01 | 5,50E-01 | Ighv7-3    | 0,27  | No  |
| ENSMUSG00000076655 | 9,01E-03  | -3,107646452 | -5,16E-10 | 1,00E+00 | 1,00E+00 | Ighv4-1    | 1,01  | No  |
| ENSMUSG00000076665 | -5,88E-02 | -3,033652696 | 1,62E-03  | 9,68E-01 | 1,00E+00 | Ighv7-1    | 0,96  | No  |
| ENSMUSG00000076672 | 1,88E+00  | -2,963229875 | 1,37E+00  | 2,42E-01 | 5,50E-01 | Ighv3-6    | 3,68  | No  |
| ENSMUSG00000076674 | -1,87E+00 | -3,107637761 | 1,39E+00  | 2,38E-01 | 5,50E-01 | Ighv3-8    | 0,27  | No  |

|                    |           |              |           |          |          |           |       |     |
|--------------------|-----------|--------------|-----------|----------|----------|-----------|-------|-----|
| ENSMUSG00000076677 | -4,79E-01 | -2,997999812 | 1,14E-01  | 7,35E-01 | 9,24E-01 | Ighv6-3   | 0,72  | No  |
| ENSMUSG00000076695 | -1,87E+00 | -3,033619006 | 1,41E+00  | 2,36E-01 | 5,50E-01 | Ighv1-18  | 0,27  | No  |
| ENSMUSG00000076731 | -3,16E+00 | -2,963246013 | 4,20E+00  | 4,04E-02 | 2,38E-01 | Ighv8-12  | 0,11  | No  |
| ENSMUSG00000076749 | 4,05E+00  | -2,711782297 | 8,02E+00  | 4,63E-03 | 5,27E-02 | Tcrg-C1   | 16,58 | No  |
| ENSMUSG00000076752 | -2,02E+00 | -2,71173098  | 3,08E+00  | 7,92E-02 | 3,60E-01 | Tcrg-C2   | 0,25  | No  |
| ENSMUSG00000076824 | 4,24E-02  | -3,033592245 | -1,17E-09 | 1,00E+00 | 1,00E+00 | Trav14n-3 | 1,03  | No  |
| ENSMUSG00000076892 | 9,01E-03  | -3,107646452 | -5,16E-10 | 1,00E+00 | 1,00E+00 | Traj38    | 1,01  | No  |
| ENSMUSG00000076915 | -3,83E-02 | -3,107651936 | -7,91E-11 | 1,00E+00 | 1,00E+00 | Traj14    | 0,97  | No  |
| ENSMUSG00000076928 | -1,98E-02 | -3,033655952 | 2,83E-11  | 1,00E+00 | 1,00E+00 | Trac      | 0,99  | No  |
| ENSMUSG00000076934 | 1,20E+00  | -2,832060761 | 8,90E-01  | 3,46E-01 | 6,46E-01 | Iglv1     | 2,30  | No  |
| ENSMUSG00000076937 | 3,13E-01  | -2,448715837 | 9,99E-02  | 7,52E-01 | 9,32E-01 | Iglc2     | 1,24  | No  |
| ENSMUSG00000076940 | -2,71E+00 | -2,963235336 | 2,92E+00  | 8,75E-02 | 3,78E-01 | Iglv2     | 0,15  | No  |
| ENSMUSG00000076941 | 3,51E+00  | -2,83205728  | 5,36E+00  | 2,06E-02 | 1,54E-01 | Gm22065   | 11,42 | No  |
| ENSMUSG00000076944 | -3,29E-01 | -2,070138085 | 2,19E-01  | 6,39E-01 | 8,69E-01 | Gm22064   | 0,80  | No  |
| ENSMUSG00000076949 | -3,83E-02 | -3,107651936 | -7,91E-11 | 1,00E+00 | 1,00E+00 | Gm22066   | 0,97  | No  |
| ENSMUSG00000076961 | -1,74E+00 | -2,71169766  | 2,10E+00  | 1,47E-01 | 4,86E-01 | Gm23251   | 0,30  | No  |
| ENSMUSG00000076972 | -1,87E+00 | -3,107637761 | 1,39E+00  | 2,38E-01 | 5,50E-01 | Mir193b   | 0,27  | No  |
| ENSMUSG00000076987 | 1,85E+00  | -3,107657832 | 1,35E+00  | 2,46E-01 | 5,50E-01 | Gm24115   | 3,61  | No  |
| ENSMUSG00000076999 | -3,29E-01 | -2,711686354 | 7,95E-02  | 7,78E-01 | 9,47E-01 | Gm22426   | 0,80  | No  |
| ENSMUSG00000077004 | -2,68E+00 | -2,963261035 | 2,84E+00  | 9,17E-02 | 3,82E-01 | Gm23876   | 0,16  | No  |
| ENSMUSG00000077019 | 3,14E-02  | -3,107617333 | -7,69E-10 | 1,00E+00 | 1,00E+00 | Gm22191   | 1,02  | No  |
| ENSMUSG00000077090 | 3,14E-02  | -3,107617333 | -7,69E-10 | 1,00E+00 | 1,00E+00 | Gm22117   | 1,02  | No  |
| ENSMUSG00000077148 | -8,79E-01 | -2,832023183 | 4,23E-01  | 5,15E-01 | 7,97E-01 | Gm22935   | 0,54  | No  |
| ENSMUSG00000077150 | -3,83E-02 | -3,107651936 | -7,91E-11 | 1,00E+00 | 1,00E+00 | Gm24581   | 0,97  | No  |
| ENSMUSG00000077155 | 3,14E-02  | -3,107617333 | -7,69E-10 | 1,00E+00 | 1,00E+00 | Gm24582   | 1,02  | No  |
| ENSMUSG00000077158 | 1,87E+00  | -3,107639691 | 1,38E+00  | 2,40E-01 | 5,50E-01 | Gm24578   | 3,67  | No  |
| ENSMUSG00000077167 | -2,45E-01 | 0,527113049  | 1,06E+00  | 3,04E-01 | 6,00E-01 | Gm24119   | 0,84  | No  |
| ENSMUSG00000077185 | 6,59E-01  | -2,289445639 | 5,58E-01  | 4,55E-01 | 7,45E-01 | Gm25091   | 1,58  | No  |
| ENSMUSG00000077192 | -1,50E+00 | -1,378058792 | 8,44E+00  | 3,67E-03 | 4,44E-02 | Snora17   | 0,35  | Yes |
| ENSMUSG00000077200 | -1,94E+00 | -3,107619243 | 1,50E+00  | 2,21E-01 | 5,50E-01 | Gm25613   | 0,26  | No  |
| ENSMUSG00000077202 | 3,87E-02  | -2,289456653 | 2,71E-03  | 9,59E-01 | 1,00E+00 | Gm25612   | 1,03  | No  |
| ENSMUSG00000077212 | 7,94E-03  | 1,195312619  | 1,60E-03  | 9,68E-01 | 1,00E+00 | Snord69   | 1,01  | No  |

|                    |           |              |           |          |          |          |      |    |
|--------------------|-----------|--------------|-----------|----------|----------|----------|------|----|
| ENSMUSG00000077217 | -1,03E+00 | -1,770569825 | 3,08E+00  | 7,94E-02 | 3,60E-01 | Gm23951  | 0,49 | No |
| ENSMUSG00000077220 | 1,48E-02  | 1,488973732  | 6,90E-03  | 9,34E-01 | 1,00E+00 | Snord78  | 1,01 | No |
| ENSMUSG00000077221 | -3,91E-01 | -2,896165094 | 9,42E-02  | 7,59E-01 | 9,36E-01 | Snord67  | 0,76 | No |
| ENSMUSG00000077222 | -3,00E-01 | -0,042674893 | 9,65E-01  | 3,26E-01 | 6,27E-01 | Gm22270  | 0,81 | No |
| ENSMUSG00000077223 | -2,68E+00 | -2,896121483 | 2,85E+00  | 9,14E-02 | 3,82E-01 | Gm22271  | 0,16 | No |
| ENSMUSG00000077227 | -3,09E-01 | -2,497588693 | 8,09E-02  | 7,76E-01 | 9,46E-01 | Gm22272  | 0,81 | No |
| ENSMUSG00000077239 | 8,39E-01  | -1,300292139 | 2,31E+00  | 1,28E-01 | 4,49E-01 | Snord66  | 1,79 | No |
| ENSMUSG00000077254 | 1,21E+00  | -2,99802822  | 6,71E-01  | 4,13E-01 | 7,08E-01 | Gm26079  | 2,31 | No |
| ENSMUSG00000077258 | 1,62E+00  | -2,832048598 | 1,81E+00  | 1,78E-01 | 5,39E-01 | Gm26082  | 3,08 | No |
| ENSMUSG00000077265 | -2,36E-01 | -0,912582699 | 3,56E-01  | 5,51E-01 | 8,17E-01 | Gm24430  | 0,85 | No |
| ENSMUSG00000077271 | -4,39E-01 | -1,863590698 | 3,55E-01  | 5,51E-01 | 8,18E-01 | Gm22781  | 0,74 | No |
| ENSMUSG00000077274 | 7,39E-01  | -2,77055918  | 2,97E-01  | 5,86E-01 | 8,39E-01 | Gm22786  | 1,67 | No |
| ENSMUSG00000077285 | -3,24E-01 | -1,033600362 | 5,73E-01  | 4,49E-01 | 7,39E-01 | Gm26394  | 0,80 | No |
| ENSMUSG00000077293 | -1,87E+00 | -3,03364178  | 1,41E+00  | 2,36E-01 | 5,50E-01 | Gm24125  | 0,27 | No |
| ENSMUSG00000077302 | 6,65E-01  | -2,896156246 | 2,39E-01  | 6,25E-01 | 8,59E-01 | Gm22473  | 1,59 | No |
| ENSMUSG00000077305 | -1,87E+00 | -3,107637761 | 1,39E+00  | 2,38E-01 | 5,50E-01 | Gm22470  | 0,27 | No |
| ENSMUSG00000077323 | -4,05E-02 | -2,963228491 | 6,10E-04  | 9,80E-01 | 1,00E+00 | Rnu11    | 0,97 | No |
| ENSMUSG00000077339 | 4,16E-01  | -2,600719678 | 1,35E-01  | 7,13E-01 | 9,11E-01 | Gm23010  | 1,33 | No |
| ENSMUSG00000077345 | 8,16E-02  | -1,863711737 | 1,63E-02  | 8,98E-01 | 1,00E+00 | Snord70  | 1,06 | No |
| ENSMUSG00000077347 | -3,83E-02 | -3,107651936 | -7,91E-11 | 1,00E+00 | 1,00E+00 | Gm24671  | 0,97 | No |
| ENSMUSG00000077349 | 2,66E+00  | -2,96324125  | 2,74E+00  | 9,79E-02 | 3,91E-01 | Gm24867  | 6,34 | No |
| ENSMUSG00000077350 | -3,83E-02 | -3,107651936 | -7,91E-11 | 1,00E+00 | 1,00E+00 | n-R5s31  | 0,97 | No |
| ENSMUSG00000077358 | 4,00E-01  | -2,268121243 | 1,90E-01  | 6,63E-01 | 8,83E-01 | Gm26293  | 1,32 | No |
| ENSMUSG00000077360 | -3,83E-02 | -3,107651936 | -7,91E-11 | 1,00E+00 | 1,00E+00 | Gm23482  | 0,97 | No |
| ENSMUSG00000077367 | 6,93E-01  | -2,22631947  | 6,97E-01  | 4,04E-01 | 7,01E-01 | Gm23483  | 1,62 | No |
| ENSMUSG00000077380 | -1,33E-01 | -1,033677105 | 1,01E-01  | 7,50E-01 | 9,31E-01 | Gm22661  | 0,91 | No |
| ENSMUSG00000077381 | -1,87E+00 | -3,107637761 | 1,39E+00  | 2,38E-01 | 5,50E-01 | Gm22660  | 0,27 | No |
| ENSMUSG00000077382 | 1,22E+00  | -1,522636966 | 4,74E+00  | 2,95E-02 | 1,96E-01 | n-R5s200 | 2,33 | No |
| ENSMUSG00000077385 | -4,13E-02 | -3,033659495 | 7,08E-04  | 9,79E-01 | 1,00E+00 | Gm22657  | 0,97 | No |
| ENSMUSG00000077387 | 1,87E+00  | -3,107639691 | 1,38E+00  | 2,40E-01 | 5,50E-01 | Gm22656  | 3,67 | No |
| ENSMUSG00000077391 | 8,71E-01  | -2,247080733 | 1,04E+00  | 3,08E-01 | 6,06E-01 | Gm24336  | 1,83 | No |
| ENSMUSG00000077394 | -2,42E-01 | -2,522692928 | 7,06E-02  | 7,90E-01 | 9,55E-01 | Gm24339  | 0,85 | No |



|                    |           |              |           |          |          |          |      |    |
|--------------------|-----------|--------------|-----------|----------|----------|----------|------|----|
| ENSMUSG00000077416 | -6,39E-01 | -2,146102866 | 7,94E-01  | 3,73E-01 | 6,74E-01 | Gm23747  | 0,64 | No |
| ENSMUSG00000077419 | 1,87E+00  | -3,033632735 | 1,36E+00  | 2,43E-01 | 5,50E-01 | Gm23744  | 3,66 | No |
| ENSMUSG00000077420 | 2,63E+00  | -2,770656706 | 2,67E+00  | 1,02E-01 | 3,94E-01 | Gm24282  | 6,19 | No |
| ENSMUSG00000077421 | -1,89E+00 | -3,1076441   | 1,42E+00  | 2,33E-01 | 5,50E-01 | Gm24283  | 0,27 | No |
| ENSMUSG00000077426 | 1,74E-01  | -0,785739175 | 1,88E-01  | 6,64E-01 | 8,84E-01 | Gm26387  | 1,13 | No |
| ENSMUSG00000077431 | 2,45E+00  | -2,71172088  | 3,55E+00  | 5,95E-02 | 3,02E-01 | Gm22591  | 5,45 | No |
| ENSMUSG00000077440 | 8,26E-02  | 0,915862894  | 1,50E-01  | 6,98E-01 | 9,04E-01 | Gm23130  | 1,06 | No |
| ENSMUSG00000077448 | -6,93E-01 | -2,070048892 | 8,18E-01  | 3,66E-01 | 6,67E-01 | Gm23126  | 0,62 | No |
| ENSMUSG00000077449 | -1,16E+00 | -3,033636805 | 5,90E-01  | 4,42E-01 | 7,34E-01 | Gm23127  | 0,45 | No |
| ENSMUSG00000077450 | 1,15E-01  | 6,592229778  | 3,40E+00  | 6,53E-02 | 3,20E-01 | Rab11b   | 1,08 | No |
| ENSMUSG00000077454 | -6,48E-02 | -2,963249916 | 1,90E-03  | 9,65E-01 | 1,00E+00 | Gm25918  | 0,96 | No |
| ENSMUSG00000077457 | -4,37E-02 | -0,600427182 | 1,30E-02  | 9,09E-01 | 1,00E+00 | Snord65  | 0,97 | No |
| ENSMUSG00000077460 | -1,23E+00 | -1,800931002 | 4,11E+00  | 4,27E-02 | 2,46E-01 | Gm26419  | 0,43 | No |
| ENSMUSG00000077465 | -5,78E-02 | -2,896167382 | 2,23E-03  | 9,62E-01 | 1,00E+00 | Gm26423  | 0,96 | No |
| ENSMUSG00000077476 | 3,14E-02  | -3,107617333 | -7,69E-10 | 1,00E+00 | 1,00E+00 | Gm24794  | 1,02 | No |
| ENSMUSG00000077484 | 1,85E+00  | -3,107657832 | 1,35E+00  | 2,46E-01 | 5,50E-01 | Gm25274  | 3,61 | No |
| ENSMUSG00000077488 | -1,94E+00 | -3,107619243 | 1,50E+00  | 2,21E-01 | 5,50E-01 | Gm25276  | 0,26 | No |
| ENSMUSG00000077493 | -2,56E-01 | -0,350043051 | 5,81E-01  | 4,46E-01 | 7,37E-01 | Snord91a | 0,84 | No |
| ENSMUSG00000077505 | -1,73E+00 | -2,655070694 | 2,08E+00  | 1,49E-01 | 4,90E-01 | Gm24233  | 0,30 | No |
| ENSMUSG00000077506 | -2,17E+00 | -2,831952198 | 2,62E+00  | 1,06E-01 | 3,98E-01 | Scarna9  | 0,22 | No |
| ENSMUSG00000077515 | -5,12E-01 | -2,070152775 | 4,21E-01  | 5,17E-01 | 7,97E-01 | Gm25878  | 0,70 | No |
| ENSMUSG00000077524 | -9,51E-01 | -2,448643241 | 7,92E-01  | 3,74E-01 | 6,74E-01 | n-R5s67  | 0,52 | No |
| ENSMUSG00000077526 | 8,20E-01  | -2,54823876  | 5,85E-01  | 4,44E-01 | 7,36E-01 | Gm25379  | 1,76 | No |
| ENSMUSG00000077527 | -4,64E-02 | -2,963261869 | 9,78E-04  | 9,75E-01 | 1,00E+00 | Gm25506  | 0,97 | No |
| ENSMUSG00000077549 | -2,44E-01 | 0,24420321   | 8,53E-01  | 3,56E-01 | 6,57E-01 | Snord71  | 0,84 | No |
| ENSMUSG00000077554 | -2,19E+00 | -2,770579875 | 2,66E+00  | 1,03E-01 | 3,95E-01 | Gm23707  | 0,22 | No |
| ENSMUSG00000077557 | -7,83E-01 | -1,929237216 | 1,45E+00  | 2,28E-01 | 5,50E-01 | Gm23706  | 0,58 | No |
| ENSMUSG00000077561 | -4,13E-02 | -3,033659495 | 7,08E-04  | 9,79E-01 | 1,00E+00 | Gm24607  | 0,97 | No |
| ENSMUSG00000077563 | 1,18E-01  | -0,131740564 | 1,43E-01  | 7,05E-01 | 9,07E-01 | Snora68  | 1,09 | No |
| ENSMUSG00000077564 | 4,75E-01  | -2,355543375 | 3,06E-01  | 5,80E-01 | 8,37E-01 | Gm23202  | 1,39 | No |
| ENSMUSG00000077565 | -2,64E-01 | -2,192540172 | 1,11E-01  | 7,38E-01 | 9,26E-01 | Gm23201  | 0,83 | No |
| ENSMUSG00000077569 | 6,34E-01  | -1,522659776 | 1,30E+00  | 2,55E-01 | 5,50E-01 | Gm24608  | 1,55 | No |

|                    |           |              |           |          |          |          |      |    |
|--------------------|-----------|--------------|-----------|----------|----------|----------|------|----|
| ENSMUSG00000077571 | -6,92E-01 | -2,963232606 | 1,93E-01  | 6,61E-01 | 8,82E-01 | Snora36b | 0,62 | No |
| ENSMUSG00000077575 | 4,63E-01  | -0,238325002 | 2,09E+00  | 1,48E-01 | 4,88E-01 | Gm24888  | 1,38 | No |
| ENSMUSG00000077577 | 9,01E-03  | -3,107646452 | -5,16E-10 | 1,00E+00 | 1,00E+00 | Gm24890  | 1,01 | No |
| ENSMUSG00000077578 | -1,74E+00 | -2,655082014 | 2,11E+00  | 1,47E-01 | 4,85E-01 | Gm25631  | 0,30 | No |
| ENSMUSG00000077591 | 1,82E+00  | -3,033661385 | 1,31E+00  | 2,52E-01 | 5,50E-01 | Gm26016  | 3,54 | No |
| ENSMUSG00000077592 | -1,89E+00 | -3,1076441   | 1,42E+00  | 2,33E-01 | 5,50E-01 | Gm26013  | 0,27 | No |
| ENSMUSG00000077595 | -7,38E-02 | -3,033659033 | 2,66E-03  | 9,59E-01 | 1,00E+00 | Gm26019  | 0,95 | No |
| ENSMUSG00000077604 | -1,18E+00 | -2,070016948 | 2,03E+00  | 1,54E-01 | 4,98E-01 | Snord1b  | 0,44 | No |
| ENSMUSG00000077611 | -5,35E-01 | -2,472924593 | 3,41E-01  | 5,59E-01 | 8,22E-01 | Gm23946  | 0,69 | No |
| ENSMUSG00000077614 | 4,37E-01  | -1,530796496 | 5,86E-01  | 4,44E-01 | 7,35E-01 | Gm25500  | 1,35 | No |
| ENSMUSG00000077621 | 2,43E-01  | -1,832023136 | 1,36E-01  | 7,12E-01 | 9,11E-01 | Gm23772  | 1,18 | No |
| ENSMUSG00000077625 | -7,95E-01 | -1,726421146 | 1,71E+00  | 1,91E-01 | 5,50E-01 | Snord4a  | 0,58 | No |
| ENSMUSG00000077637 | -5,35E-01 | -0,614001933 | 2,04E+00  | 1,53E-01 | 4,96E-01 | Gm22771  | 0,69 | No |
| ENSMUSG00000077639 | -5,90E-02 | -1,226347777 | 1,47E-02  | 9,04E-01 | 1,00E+00 | Gm22772  | 0,96 | No |
| ENSMUSG00000077667 | -2,73E-02 | -2,963256629 | 3,40E-04  | 9,85E-01 | 1,00E+00 | Gm26147  | 0,98 | No |
| ENSMUSG00000077668 | -1,12E-01 | -2,770567961 | 1,20E-02  | 9,13E-01 | 1,00E+00 | Gm26143  | 0,93 | No |
| ENSMUSG00000077685 | -1,84E-02 | -3,033644089 | 8,41E-05  | 9,93E-01 | 1,00E+00 | Gm22498  | 0,99 | No |
| ENSMUSG00000077697 | 3,14E-02  | -3,107617333 | -7,69E-10 | 1,00E+00 | 1,00E+00 | Gm25346  | 1,02 | No |
| ENSMUSG00000077698 | -9,02E-01 | -1,212717335 | 3,13E+00  | 7,68E-02 | 3,53E-01 | Snord12  | 0,54 | No |
| ENSMUSG00000077702 | -5,98E-01 | -0,64800853  | 2,24E+00  | 1,34E-01 | 4,61E-01 | Gm24067  | 0,66 | No |
| ENSMUSG00000077704 | -1,34E-01 | -0,14623152  | 1,60E-01  | 6,89E-01 | 8,99E-01 | Snord89  | 0,91 | No |
| ENSMUSG00000077705 | -1,53E-01 | -1,267999574 | 9,33E-02  | 7,60E-01 | 9,37E-01 | n-R5s202 | 0,90 | No |
| ENSMUSG00000077709 | -4,07E-01 | 0,786889236  | 3,08E+00  | 7,93E-02 | 3,60E-01 | Snora64  | 0,75 | No |
| ENSMUSG00000077711 | -4,20E-01 | -0,627585337 | 1,24E+00  | 2,65E-01 | 5,60E-01 | AF357399 | 0,75 | No |
| ENSMUSG00000077714 | 9,43E-02  | 0,288105893  | 1,25E-01  | 7,24E-01 | 9,17E-01 | Snord17  | 1,07 | No |
| ENSMUSG00000077717 | -3,83E-02 | -3,107651936 | -7,91E-11 | 1,00E+00 | 1,00E+00 | Gm25726  | 0,97 | No |
| ENSMUSG00000077730 | 3,14E-02  | -3,107617333 | -7,69E-10 | 1,00E+00 | 1,00E+00 | Gm23609  | 1,02 | No |
| ENSMUSG00000077733 | -7,12E-01 | -2,033565109 | 8,64E-01  | 3,53E-01 | 6,54E-01 | Gm23608  | 0,61 | No |
| ENSMUSG00000077734 | 1,88E-01  | -0,211000877 | 3,43E-01  | 5,58E-01 | 8,22E-01 | Snord83b | 1,14 | No |
| ENSMUSG00000077737 | -1,80E-01 | 0,604398567  | 5,97E-01  | 4,40E-01 | 7,32E-01 | Snord72  | 0,88 | No |
| ENSMUSG00000077744 | 9,01E-03  | -3,107646452 | -5,16E-10 | 1,00E+00 | 1,00E+00 | Gm26343  | 1,01 | No |
| ENSMUSG00000077756 | 7,37E-01  | -2,963270272 | 2,96E-01  | 5,86E-01 | 8,39E-01 | Snord90  | 1,67 | No |

|                    |           |              |           |          |          |            |      |     |
|--------------------|-----------|--------------|-----------|----------|----------|------------|------|-----|
| ENSMUSG00000077758 | 4,24E-02  | -3,033592245 | -1,17E-09 | 1,00E+00 | 1,00E+00 | Gm23527    | 1,03 | No  |
| ENSMUSG00000077759 | -1,87E+00 | -3,03364178  | 1,41E+00  | 2,36E-01 | 5,50E-01 | Gm23528    | 0,27 | No  |
| ENSMUSG00000077761 | 3,14E-02  | -3,107617333 | -7,69E-10 | 1,00E+00 | 1,00E+00 | Gm25214    | 1,02 | No  |
| ENSMUSG00000077780 | -3,88E-03 | -3,03362684  | 4,02E-12  | 1,00E+00 | 1,00E+00 | Gm24161    | 1,00 | No  |
| ENSMUSG00000077785 | -1,02E-01 | -2,770607829 | 7,01E-03  | 9,33E-01 | 1,00E+00 | Gm23910    | 0,93 | No  |
| ENSMUSG00000077787 | -7,10E-02 | -1,424798701 | 1,89E-02  | 8,91E-01 | 1,00E+00 | Gm23908    | 0,95 | No  |
| ENSMUSG00000077789 | 1,87E+00  | -3,107639691 | 1,38E+00  | 2,40E-01 | 5,50E-01 | n-R5s26    | 3,67 | No  |
| ENSMUSG00000077796 | -1,39E+00 | -2,831984581 | 1,21E+00  | 2,71E-01 | 5,68E-01 | Gm25562    | 0,38 | No  |
| ENSMUSG00000077797 | 1,31E-01  | 0,505540237  | 2,63E-01  | 6,08E-01 | 8,51E-01 | Snord19    | 1,09 | No  |
| ENSMUSG00000077799 | 1,23E+00  | -2,831989638 | 9,43E-01  | 3,31E-01 | 6,32E-01 | Gm25148    | 2,35 | No  |
| ENSMUSG00000077802 | -2,74E+00 | -3,033596063 | 2,99E+00  | 8,38E-02 | 3,71E-01 | n-R5s52    | 0,15 | No  |
| ENSMUSG00000077804 | 1,87E+00  | -3,107639691 | 1,38E+00  | 2,40E-01 | 5,50E-01 | Gm24403    | 3,67 | No  |
| ENSMUSG00000077844 | 1,85E+00  | -3,107657832 | 1,35E+00  | 2,46E-01 | 5,50E-01 | Gm22231    | 3,61 | No  |
| ENSMUSG00000077846 | 7,72E-01  | -2,89613394  | 3,26E-01  | 5,68E-01 | 8,30E-01 | Gm22232    | 1,71 | No  |
| ENSMUSG00000077884 | -4,25E-01 | -2,54821128  | 1,84E-01  | 6,68E-01 | 8,86E-01 | Gm24557    | 0,74 | No  |
| ENSMUSG00000077890 | -1,33E+00 | -2,800928982 | 1,10E+00  | 2,94E-01 | 5,89E-01 | Mir875     | 0,40 | No  |
| ENSMUSG00000077897 | 3,02E-01  | -2,311201326 | 9,30E-02  | 7,60E-01 | 9,37E-01 | Mir511     | 1,23 | No  |
| ENSMUSG00000077931 | 3,92E-02  | 1,106025454  | 3,68E-02  | 8,48E-01 | 9,88E-01 | Mir877     | 1,03 | No  |
| ENSMUSG00000077962 | 1,63E+00  | -2,711734455 | 1,83E+00  | 1,77E-01 | 5,36E-01 | Mir874     | 3,10 | No  |
| ENSMUSG00000077965 | -1,90E+00 | -3,107628502 | 1,44E+00  | 2,29E-01 | 5,50E-01 | Gm24605    | 0,27 | No  |
| ENSMUSG00000077990 | 4,43E-01  | -1,378411122 | 7,34E-01  | 3,92E-01 | 6,92E-01 | Gm23134    | 1,36 | No  |
| ENSMUSG00000078087 | -9,45E-02 | 6,272877106  | 2,20E+00  | 1,38E-01 | 4,69E-01 | Rps12l1    | 0,94 | No  |
| ENSMUSG00000078091 | 2,61E+00  | -2,711743537 | 2,65E+00  | 1,04E-01 | 3,96E-01 | Gm10912    | 6,12 | No  |
| ENSMUSG00000078097 | -3,29E-01 | -2,070187495 | 1,62E-01  | 6,87E-01 | 8,98E-01 | Gm10913    | 0,80 | No  |
| ENSMUSG00000078125 | -4,37E-01 | 1,432771299  | 5,82E+00  | 1,59E-02 | 1,31E-01 | Gm10916    | 0,74 | No  |
| ENSMUSG00000078126 | -1,16E-01 | 7,739553551  | 3,93E+00  | 4,75E-02 | 2,61E-01 | Rpl23a-ps3 | 0,92 | No  |
| ENSMUSG00000078127 | 2,00E+00  | -1,627772392 | 8,89E+00  | 2,86E-03 | 3,69E-02 | Fam170b    | 4,01 | Yes |
| ENSMUSG00000078128 | -2,68E+00 | -2,896144247 | 2,85E+00  | 9,15E-02 | 3,82E-01 | Gm2178     | 0,16 | No  |
| ENSMUSG00000078129 | 8,19E-01  | -2,311207645 | 5,84E-01  | 4,45E-01 | 7,36E-01 | Actl10     | 1,76 | No  |
| ENSMUSG00000078134 | 3,59E-02  | 5,523990037  | 2,71E-01  | 6,03E-01 | 8,48E-01 | Gm12355    | 1,03 | No  |
| ENSMUSG00000078137 | 1,72E-01  | 4,492541791  | 4,57E+00  | 3,25E-02 | 2,10E-01 | Ankrd63    | 1,13 | No  |
| ENSMUSG00000078139 | 3,22E-02  | 3,782815852  | 1,16E-01  | 7,34E-01 | 9,23E-01 | AK157302   | 1,02 | No  |

|                    |           |              |           |          |          |               |      |     |
|--------------------|-----------|--------------|-----------|----------|----------|---------------|------|-----|
| ENSMUSG00000078141 | -1,94E+00 | -3,107619243 | 1,50E+00  | 2,21E-01 | 5,50E-01 | Gm2399        | 0,26 | No  |
| ENSMUSG00000078143 | 1,67E-01  | 4,298913867  | 4,01E+00  | 4,53E-02 | 2,54E-01 | Gm17344       | 1,12 | No  |
| ENSMUSG00000078144 | 3,01E-01  | 0,873118476  | 1,78E+00  | 1,82E-01 | 5,44E-01 | Capns2        | 1,23 | No  |
| ENSMUSG00000078151 | -1,39E-02 | 4,311574723  | 2,82E-02  | 8,67E-01 | 9,99E-01 | Gm12226       | 0,99 | No  |
| ENSMUSG00000078153 | -4,37E-01 | 7,812166236  | 5,57E+01  | 8,43E-14 | 1,18E-11 | Psme2b        | 0,74 | Yes |
| ENSMUSG00000078154 | -3,76E-02 | 5,921830444  | 3,26E-01  | 5,68E-01 | 8,30E-01 | Gm12184       | 0,97 | No  |
| ENSMUSG00000078157 | -8,51E-01 | -1,033506436 | 3,53E+00  | 6,04E-02 | 3,04E-01 | 4931440F15Rik | 0,55 | No  |
| ENSMUSG00000078160 | 2,43E-01  | -1,740824723 | 1,36E-01  | 7,12E-01 | 9,11E-01 | Gm16503       | 1,18 | No  |
| ENSMUSG00000078162 | 8,67E-02  | 6,356547081  | 1,86E+00  | 1,72E-01 | 5,29E-01 | Gm2574        | 1,06 | No  |
| ENSMUSG00000078173 | 1,44E-01  | 1,16596145   | 5,52E-01  | 4,58E-01 | 7,47E-01 | Lenep         | 1,11 | No  |
| ENSMUSG00000078180 | -3,39E-01 | 2,902681262  | 8,39E+00  | 3,78E-03 | 4,53E-02 | Gm20900       | 0,79 | Yes |
| ENSMUSG00000078182 | 1,81E+00  | -3,10765737  | 1,28E+00  | 2,58E-01 | 5,50E-01 | Gm6083        | 3,49 | No  |
| ENSMUSG00000078183 | -9,47E-02 | 3,101440586  | 7,38E-01  | 3,90E-01 | 6,90E-01 | Gm15610       | 0,94 | No  |
| ENSMUSG00000078184 | -1,97E-01 | 4,828800508  | 6,68E+00  | 9,77E-03 | 9,18E-02 | Rbm8a2        | 0,87 | No  |
| ENSMUSG00000078185 | 2,56E-02  | 5,147768579  | 1,25E-01  | 7,24E-01 | 9,18E-01 | Chml          | 1,02 | No  |
| ENSMUSG00000078190 | -1,90E+00 | -2,963262532 | 1,44E+00  | 2,31E-01 | 5,50E-01 | Dnm3os        | 0,27 | No  |
| ENSMUSG00000078192 | -1,25E+00 | -2,497666241 | 1,49E+00  | 2,21E-01 | 5,50E-01 | Gm7290        | 0,42 | No  |
| ENSMUSG00000078193 | -1,69E-01 | 7,992556373  | 8,42E+00  | 3,72E-03 | 4,48E-02 | Gm2000        | 0,89 | Yes |
| ENSMUSG00000078197 | -4,69E-02 | -2,832012543 | 1,46E-03  | 9,70E-01 | 1,00E+00 | Gm17374       | 0,97 | No  |
| ENSMUSG00000078201 | 3,44E-03  | 2,602329504  | 7,35E-04  | 9,78E-01 | 1,00E+00 | Tmem203       | 1,00 | No  |
| ENSMUSG00000078202 | -6,35E-01 | -1,627681078 | 1,37E+00  | 2,42E-01 | 5,50E-01 | Nrarp         | 0,64 | No  |
| ENSMUSG00000078234 | -1,92E+00 | -3,033623267 | 1,46E+00  | 2,27E-01 | 5,50E-01 | Klhdc7a       | 0,26 | No  |
| ENSMUSG00000078238 | -1,73E-01 | 7,821142658  | 8,71E+00  | 3,16E-03 | 3,99E-02 | Gm12854       | 0,89 | Yes |
| ENSMUSG00000078240 | -5,64E-02 | 1,528465741  | 1,05E-01  | 7,46E-01 | 9,29E-01 | Gm3550        | 0,96 | No  |
| ENSMUSG00000078247 | 5,12E-01  | 1,411764692  | 7,88E+00  | 4,99E-03 | 5,59E-02 | Airn          | 1,43 | No  |
| ENSMUSG00000078249 | -6,96E-02 | 6,914790256  | 1,30E+00  | 2,55E-01 | 5,50E-01 | Hmga1-rs1     | 0,95 | No  |
| ENSMUSG00000078251 | -5,47E-03 | -2,963221188 | 1,50E-05  | 9,97E-01 | 1,00E+00 | Gm16487       | 1,00 | No  |
| ENSMUSG00000078289 | -8,31E-01 | -2,896155618 | 3,78E-01  | 5,38E-01 | 8,09E-01 | Gm10923       | 0,56 | No  |
| ENSMUSG00000078291 | -3,51E-01 | -0,863777044 | 7,29E-01  | 3,93E-01 | 6,93E-01 | Gm3940        | 0,78 | No  |
| ENSMUSG00000078300 | 4,64E-02  | 7,298302758  | 6,01E-01  | 4,38E-01 | 7,31E-01 | Gm2606        | 1,03 | No  |
| ENSMUSG00000078302 | -3,83E-02 | -3,107651936 | -7,91E-11 | 1,00E+00 | 1,00E+00 | Foxd1         | 0,97 | No  |
| ENSMUSG00000078307 | 9,01E-03  | -3,107646452 | -5,16E-10 | 1,00E+00 | 1,00E+00 | AI593442      | 1,01 | No  |

|                    |           |              |          |          |          |               |      |     |
|--------------------|-----------|--------------|----------|----------|----------|---------------|------|-----|
| ENSMUSG00000078308 | -1,16E+00 | -1,333045739 | 5,27E+00 | 2,17E-02 | 1,59E-01 | Gm7293        | 0,45 | No  |
| ENSMUSG00000078348 | 4,38E-02  | 5,579966762  | 4,08E-01 | 5,23E-01 | 8,01E-01 | Sf3b5         | 1,03 | No  |
| ENSMUSG00000078349 | 1,65E-01  | -0,367054285 | 2,33E-01 | 6,30E-01 | 8,62E-01 | AW011738      | 1,12 | No  |
| ENSMUSG00000078350 | -7,58E-03 | 3,626201509  | 6,12E-03 | 9,38E-01 | 1,00E+00 | Smim1         | 0,99 | No  |
| ENSMUSG00000078365 | 2,65E+00  | -3,033655087 | 2,73E+00 | 9,86E-02 | 3,91E-01 | Mos           | 6,30 | No  |
| ENSMUSG00000078370 | -8,30E-02 | 2,693850274  | 4,70E-01 | 4,93E-01 | 7,79E-01 | Gm6316        | 0,94 | No  |
| ENSMUSG00000078377 | -1,99E-01 | 7,271655365  | 1,10E+01 | 9,02E-04 | 1,49E-02 | Gm4294        | 0,87 | Yes |
| ENSMUSG00000078380 | -6,20E-02 | -2,268024747 | 5,76E-03 | 9,39E-01 | 1,00E+00 | Gm6096        | 0,96 | No  |
| ENSMUSG00000078427 | 8,80E-02  | 3,284380336  | 6,94E-01 | 4,05E-01 | 7,02E-01 | Sarnp         | 1,06 | No  |
| ENSMUSG00000078429 | -2,95E-02 | 7,408859464  | 2,46E-01 | 6,20E-01 | 8,57E-01 | Ctdsp2        | 0,98 | No  |
| ENSMUSG00000078430 | -1,89E+00 | -3,1076441   | 1,42E+00 | 2,33E-01 | 5,50E-01 | Gm10936       | 0,27 | No  |
| ENSMUSG00000078435 | -9,83E-03 | 1,041267894  | 2,42E-03 | 9,61E-01 | 1,00E+00 | AU041133      | 0,99 | No  |
| ENSMUSG00000078439 | -4,04E-02 | 2,779833835  | 1,12E-01 | 7,38E-01 | 9,26E-01 | Smim24        | 0,97 | No  |
| ENSMUSG00000078440 | -9,32E-03 | 4,545736061  | 1,35E-02 | 9,08E-01 | 1,00E+00 | Dohh          | 0,99 | No  |
| ENSMUSG00000078444 | 8,16E-01  | -2,548251016 | 5,79E-01 | 4,47E-01 | 7,37E-01 | Gm10941       | 1,76 | No  |
| ENSMUSG00000078451 | 1,31E+00  | -2,311202244 | 2,03E+00 | 1,54E-01 | 4,97E-01 | Ppil6         | 2,47 | No  |
| ENSMUSG00000078452 | -3,59E-02 | -0,479039217 | 9,76E-03 | 9,21E-01 | 1,00E+00 | Raet1d        | 0,98 | No  |
| ENSMUSG00000078453 | -3,01E-02 | 5,464872193  | 1,89E-01 | 6,64E-01 | 8,84E-01 | Abracl        | 0,98 | No  |
| ENSMUSG00000078480 | -4,28E-02 | 4,153768119  | 2,44E-01 | 6,21E-01 | 8,57E-01 | Mrpl48-ps     | 0,97 | No  |
| ENSMUSG00000078485 | 2,68E-02  | 5,572409488  | 1,53E-01 | 6,95E-01 | 9,02E-01 | Plekhn1       | 1,02 | No  |
| ENSMUSG00000078486 | -1,45E-01 | 3,127092766  | 1,78E+00 | 1,82E-01 | 5,45E-01 | Perm1         | 0,90 | No  |
| ENSMUSG00000078487 | -2,70E+00 | -3,033614577 | 2,89E+00 | 8,93E-02 | 3,79E-01 | Ankrd65       | 0,15 | No  |
| ENSMUSG00000078489 | -2,41E-01 | -2,574228134 | 6,31E-02 | 8,02E-01 | 9,61E-01 | Gm17106       | 0,85 | No  |
| ENSMUSG00000078490 | -4,45E-01 | 1,41631653   | 6,61E+00 | 1,02E-02 | 9,45E-02 | Cfap74        | 0,73 | No  |
| ENSMUSG00000078492 | 1,85E+00  | -3,107657832 | 1,35E+00 | 2,46E-01 | 5,50E-01 | 1700045H11Rik | 3,61 | No  |
| ENSMUSG00000078494 | 7,27E-01  | -2,107725672 | 9,42E-01 | 3,32E-01 | 6,32E-01 | Gm13201       | 1,65 | No  |
| ENSMUSG00000078495 | -4,86E-02 | 5,305414209  | 4,79E-01 | 4,89E-01 | 7,76E-01 | Zfp984        | 0,97 | No  |
| ENSMUSG00000078496 | -8,42E-02 | 0,372054302  | 1,10E-01 | 7,40E-01 | 9,26E-01 | Zfp982        | 0,94 | No  |
| ENSMUSG00000078497 | 5,07E-01  | -2,497612096 | 3,50E-01 | 5,54E-01 | 8,20E-01 | Zfp978        | 1,42 | No  |
| ENSMUSG00000078498 | -4,62E-01 | -1,627559535 | 6,80E-01 | 4,10E-01 | 7,06E-01 | Zfp988        | 0,73 | No  |
| ENSMUSG00000078500 | -1,22E+00 | -2,750899356 | 1,15E+00 | 2,83E-01 | 5,79E-01 | Zfp986        | 0,43 | No  |
| ENSMUSG00000078502 | -1,10E-01 | 5,125925164  | 2,33E+00 | 1,27E-01 | 4,46E-01 | Gm13212       | 0,93 | No  |

|                    |           |              |          |          |          |               |       |     |
|--------------------|-----------|--------------|----------|----------|----------|---------------|-------|-----|
| ENSMUSG00000078503 | 8,52E-01  | -2,179288738 | 1,23E+00 | 2,68E-01 | 5,65E-01 | Zfp990        | 1,80  | No  |
| ENSMUSG00000078515 | 1,11E-01  | 7,064893207  | 3,41E+00 | 6,50E-02 | 3,19E-01 | Ddi2          | 1,08  | No  |
| ENSMUSG00000078517 | 1,27E-01  | 5,604294917  | 3,48E+00 | 6,23E-02 | 3,11E-01 | Emc1          | 1,09  | No  |
| ENSMUSG00000078519 | 6,07E-01  | -1,627728985 | 9,61E-01 | 3,27E-01 | 6,28E-01 | 2310026L22Rik | 1,52  | No  |
| ENSMUSG00000078521 | 4,02E-01  | 1,574548346  | 5,44E+00 | 1,96E-02 | 1,49E-01 | Aunip         | 1,32  | No  |
| ENSMUSG00000078528 | -1,71E+00 | -2,548184036 | 2,03E+00 | 1,54E-01 | 4,98E-01 | Gm17068       | 0,31  | No  |
| ENSMUSG00000078532 | 2,85E-02  | 2,808957702  | 5,81E-02 | 8,09E-01 | 9,65E-01 | Nkain1        | 1,02  | No  |
| ENSMUSG00000078546 | -9,88E-02 | 3,041879474  | 8,02E-01 | 3,70E-01 | 6,72E-01 | Zfp995        | 0,93  | No  |
| ENSMUSG00000078552 | -1,25E-01 | 3,122348626  | 1,30E+00 | 2,54E-01 | 5,50E-01 | Dcdc2b        | 0,92  | No  |
| ENSMUSG00000078554 | 7,05E-01  | -2,83200187  | 2,71E-01 | 6,03E-01 | 8,48E-01 | Fam229a       | 1,63  | No  |
| ENSMUSG00000078566 | 4,50E-01  | 4,120247323  | 2,57E+01 | 3,93E-07 | 1,91E-05 | Bnip3         | 1,37  | Yes |
| ENSMUSG00000078570 | -3,33E-03 | 3,322083733  | 1,01E-03 | 9,75E-01 | 1,00E+00 | 1110065P20Rik | 1,00  | No  |
| ENSMUSG00000078572 | 4,35E-02  | 3,385719525  | 1,76E-01 | 6,75E-01 | 8,91E-01 | Ndufaf8       | 1,03  | No  |
| ENSMUSG00000078578 | -9,12E-02 | 8,182623487  | 2,48E+00 | 1,15E-01 | 4,20E-01 | Ube2d3        | 0,94  | No  |
| ENSMUSG00000078580 | 3,78E-01  | 1,814068523  | 5,78E+00 | 1,62E-02 | 1,32E-01 | E430018J23Rik | 1,30  | No  |
| ENSMUSG00000078584 | -5,22E-02 | 4,059332795  | 3,57E-01 | 5,50E-01 | 8,17E-01 | AU022252      | 0,96  | No  |
| ENSMUSG00000078588 | 3,81E-01  | -1,880147415 | 3,45E-01 | 5,57E-01 | 8,21E-01 | Ccdc24        | 1,30  | No  |
| ENSMUSG00000078590 | 3,54E+00  | -2,896165367 | 5,45E+00 | 1,96E-02 | 1,49E-01 | Gm10959       | 11,62 | No  |
| ENSMUSG00000078592 | 8,89E-02  | 5,960948252  | 1,83E+00 | 1,77E-01 | 5,36E-01 | Gm4609        | 1,06  | No  |
| ENSMUSG00000078597 | 2,75E-01  | 1,206684872  | 1,84E+00 | 1,75E-01 | 5,33E-01 | Cyp4a12b      | 1,21  | No  |
| ENSMUSG00000078601 | -1,35E+00 | -2,574195026 | 1,14E+00 | 2,85E-01 | 5,82E-01 | Gm12525       | 0,39  | No  |
| ENSMUSG00000078604 | 9,27E-02  | -2,069990578 | 1,12E-02 | 9,16E-01 | 1,00E+00 | Gm10961       | 1,07  | No  |
| ENSMUSG00000078606 | -1,53E-01 | 7,710805494  | 6,76E+00 | 9,34E-03 | 8,87E-02 | Gm4070        | 0,90  | No  |
| ENSMUSG00000078607 | -4,32E-01 | -0,726183182 | 1,23E+00 | 2,68E-01 | 5,64E-01 | 1810010H24Rik | 0,74  | No  |
| ENSMUSG00000078611 | 7,95E-01  | -1,946322427 | 1,55E+00 | 2,13E-01 | 5,50E-01 | Gm5901        | 1,74  | No  |
| ENSMUSG00000078612 | 2,36E-01  | 3,194036342  | 4,81E+00 | 2,83E-02 | 1,91E-01 | Fyb2          | 1,18  | No  |
| ENSMUSG00000078616 | 3,44E-01  | 1,915378664  | 5,00E+00 | 2,54E-02 | 1,76E-01 | Trim30c       | 1,27  | No  |
| ENSMUSG00000078619 | 5,25E-02  | 6,552133269  | 7,06E-01 | 4,01E-01 | 6,99E-01 | Smarcd2       | 1,04  | No  |
| ENSMUSG00000078620 | 1,41E-01  | -0,997994629 | 9,92E-02 | 7,53E-01 | 9,33E-01 | Gm10964       | 1,10  | No  |
| ENSMUSG00000078622 | 1,79E-01  | 6,009741207  | 7,47E+00 | 6,26E-03 | 6,63E-02 | Ccdc47        | 1,13  | No  |
| ENSMUSG00000078626 | 2,65E+00  | -3,033655087 | 2,73E+00 | 9,86E-02 | 3,91E-01 | Gm12790       | 6,30  | No  |
| ENSMUSG00000078627 | 1,85E+00  | -3,107657832 | 1,35E+00 | 2,46E-01 | 5,50E-01 | March10       | 3,61  | No  |

|                    |           |              |           |          |          |               |      |     |
|--------------------|-----------|--------------|-----------|----------|----------|---------------|------|-----|
| ENSMUSG00000078630 | 5,72E-02  | 2,90962331   | 2,47E-01  | 6,19E-01 | 8,56E-01 | Tomt          | 1,04 | No  |
| ENSMUSG00000078632 | -6,22E-01 | -1,600721384 | 1,42E+00  | 2,33E-01 | 5,50E-01 | Lrrc37a       | 0,65 | No  |
| ENSMUSG00000078635 | -6,05E-01 | -0,088688832 | 4,35E+00  | 3,69E-02 | 2,28E-01 | 1700028N14Rik | 0,66 | No  |
| ENSMUSG00000078636 | 9,33E-02  | 7,776145624  | 2,53E+00  | 1,12E-01 | 4,11E-01 | Gm7336        | 1,07 | No  |
| ENSMUSG00000078650 | 1,89E+00  | -3,033614598 | 1,38E+00  | 2,40E-01 | 5,50E-01 | G6pc          | 3,70 | No  |
| ENSMUSG00000078651 | 3,21E-02  | 2,475905829  | 6,07E-02  | 8,05E-01 | 9,63E-01 | Aoc2          | 1,02 | No  |
| ENSMUSG00000078652 | 4,71E-02  | 6,739445756  | 5,82E-01  | 4,45E-01 | 7,36E-01 | Psme3         | 1,03 | No  |
| ENSMUSG00000078653 | -3,51E-02 | 4,607752829  | 1,98E-01  | 6,56E-01 | 8,80E-01 | Cntd1         | 0,98 | No  |
| ENSMUSG00000078655 | -1,14E-02 | -3,033635021 | 1,50E-05  | 9,97E-01 | 1,00E+00 | Gm10972       | 0,99 | No  |
| ENSMUSG00000078656 | 4,14E-03  | 4,615899168  | 2,76E-03  | 9,58E-01 | 1,00E+00 | Vps25         | 1,00 | No  |
| ENSMUSG00000078668 | 3,14E-02  | -3,107617333 | -7,69E-10 | 1,00E+00 | 1,00E+00 | Gm11595       | 1,02 | No  |
| ENSMUSG00000078670 | -1,12E+00 | -2,831960619 | 7,39E-01  | 3,90E-01 | 6,90E-01 | Fam174b       | 0,46 | No  |
| ENSMUSG00000078671 | -1,98E-01 | 6,857332203  | 1,05E+01  | 1,22E-03 | 1,91E-02 | Chd2          | 0,87 | Yes |
| ENSMUSG00000078676 | -2,79E-02 | 5,963135151  | 1,82E-01  | 6,70E-01 | 8,88E-01 | Casc3         | 0,98 | No  |
| ENSMUSG00000078677 | -5,73E-01 | -2,711646423 | 2,57E-01  | 6,12E-01 | 8,52E-01 | Gm10974       | 0,67 | No  |
| ENSMUSG00000078681 | 1,39E-01  | 3,921622072  | 2,34E+00  | 1,26E-01 | 4,44E-01 | Tm2d3         | 1,10 | No  |
| ENSMUSG00000078684 | 1,59E-01  | 5,476664999  | 5,29E+00  | 2,15E-02 | 1,58E-01 | 5830417I10Rik | 1,12 | No  |
| ENSMUSG00000078691 | -2,63E-02 | -3,033653157 | 2,33E-04  | 9,88E-01 | 1,00E+00 | Gm6821        | 0,98 | No  |
| ENSMUSG00000078695 | -4,49E-02 | 2,91227306   | 1,53E-01  | 6,95E-01 | 9,02E-01 | Cisd3         | 0,97 | No  |
| ENSMUSG00000078700 | 7,22E-02  | 2,352461046  | 2,81E-01  | 5,96E-01 | 8,44E-01 | D030028A08Rik | 1,05 | No  |
| ENSMUSG00000078713 | -4,15E-03 | 4,847659197  | 2,99E-03  | 9,56E-01 | 1,00E+00 | Tomm5         | 1,00 | No  |
| ENSMUSG00000078716 | -3,19E-01 | 2,030341537  | 4,90E+00  | 2,68E-02 | 1,84E-01 | Tmem8b        | 0,80 | No  |
| ENSMUSG00000078719 | 5,38E-03  | 3,052494462  | 2,38E-03  | 9,61E-01 | 1,00E+00 | Msmg          | 1,00 | No  |
| ENSMUSG00000078722 | -1,87E+00 | -3,107637761 | 1,39E+00  | 2,38E-01 | 5,50E-01 | Gm12394       | 0,27 | No  |
| ENSMUSG00000078735 | 1,24E-01  | 2,59562031   | 9,66E-01  | 3,26E-01 | 6,26E-01 | Il11ra2       | 1,09 | No  |
| ENSMUSG00000078747 | -2,34E+00 | -2,997968205 | 2,15E+00  | 1,43E-01 | 4,77E-01 | Gm20878       | 0,20 | No  |
| ENSMUSG00000078752 | 4,76E-01  | -2,711673553 | 1,77E-01  | 6,74E-01 | 8,90E-01 | Scgb1b30      | 1,39 | No  |
| ENSMUSG00000078762 | -4,52E-02 | 3,211402438  | 1,84E-01  | 6,68E-01 | 8,86E-01 | Haus5         | 0,97 | No  |
| ENSMUSG00000078763 | -1,13E-01 | 4,262164887  | 1,80E+00  | 1,79E-01 | 5,40E-01 | Slfn1         | 0,92 | No  |
| ENSMUSG00000078765 | -5,52E-02 | 3,247572048  | 2,72E-01  | 6,02E-01 | 8,48E-01 | U2af1l4       | 0,96 | No  |
| ENSMUSG00000078768 | 1,57E-01  | 0,529866566  | 4,31E-01  | 5,12E-01 | 7,94E-01 | Zfp566        | 1,11 | No  |
| ENSMUSG00000078771 | -3,20E-03 | 7,176810961  | 2,83E-03  | 9,58E-01 | 1,00E+00 | Evi2a         | 1,00 | No  |

|                    |           |              |          |          |          |               |      |     |
|--------------------|-----------|--------------|----------|----------|----------|---------------|------|-----|
| ENSMUSG00000078772 | -8,31E-02 | 0,530112464  | 1,16E-01 | 7,34E-01 | 9,23E-01 | Gm12353       | 0,94 | No  |
| ENSMUSG00000078773 | 1,91E-01  | 3,142512904  | 3,13E+00 | 7,70E-02 | 3,54E-01 | Rad54b        | 1,14 | No  |
| ENSMUSG00000078776 | -8,20E-02 | 0,327810896  | 1,07E-01 | 7,44E-01 | 9,29E-01 | 9530053A07Rik | 0,94 | No  |
| ENSMUSG00000078779 | 2,30E-01  | 1,946539508  | 2,41E+00 | 1,21E-01 | 4,34E-01 | Zfp59         | 1,17 | No  |
| ENSMUSG00000078780 | -1,07E-01 | 0,975411923  | 2,47E-01 | 6,19E-01 | 8,56E-01 | Gm5150        | 0,93 | No  |
| ENSMUSG00000078783 | 2,74E-01  | -0,201019989 | 6,65E-01 | 4,15E-01 | 7,10E-01 | Gm9733        | 1,21 | No  |
| ENSMUSG00000078784 | -3,94E-01 | 2,041122665  | 6,84E+00 | 8,92E-03 | 8,58E-02 | 1810022K09Rik | 0,76 | No  |
| ENSMUSG00000078786 | -8,24E-02 | 3,563112413  | 7,10E-01 | 3,99E-01 | 6,98E-01 | BC024978      | 0,94 | No  |
| ENSMUSG00000078787 | 3,30E-01  | 0,17940315   | 1,46E+00 | 2,26E-01 | 5,50E-01 | Cyp2t4        | 1,26 | No  |
| ENSMUSG00000078789 | 4,11E-02  | 3,955258206  | 2,10E-01 | 6,47E-01 | 8,74E-01 | Dph1          | 1,03 | No  |
| ENSMUSG00000078794 | -4,69E-01 | 0,683645939  | 4,20E+00 | 4,03E-02 | 2,38E-01 | Dact3         | 0,72 | No  |
| ENSMUSG00000078795 | -1,40E+00 | 2,045490397  | 8,44E+01 | 4,03E-20 | 9,14E-18 | Ceacam15      | 0,38 | Yes |
| ENSMUSG00000078796 | 5,92E-01  | -0,755712127 | 2,14E+00 | 1,43E-01 | 4,78E-01 | Zfp541        | 1,51 | No  |
| ENSMUSG00000078810 | -7,13E-02 | -2,711744017 | 3,42E-03 | 9,53E-01 | 1,00E+00 | Gp6           | 0,95 | No  |
| ENSMUSG00000078812 | 4,69E-02  | 8,794509327  | 6,75E-01 | 4,11E-01 | 7,07E-01 | Eif5a         | 1,03 | No  |
| ENSMUSG00000078813 | -1,17E-01 | 3,535194887  | 1,48E+00 | 2,24E-01 | 5,50E-01 | Leng1         | 0,92 | No  |
| ENSMUSG00000078815 | -7,52E-01 | -1,801037999 | 1,48E+00 | 2,24E-01 | 5,50E-01 | Cacng6        | 0,59 | No  |
| ENSMUSG00000078816 | -2,64E-01 | 3,040960639  | 5,26E+00 | 2,18E-02 | 1,59E-01 | Prkcg         | 0,83 | No  |
| ENSMUSG00000078817 | -5,38E-02 | -2,600718632 | 2,63E-03 | 9,59E-01 | 1,00E+00 | Nlrp12        | 0,96 | No  |
| ENSMUSG00000078838 | 7,54E-01  | -2,89614743  | 3,10E-01 | 5,78E-01 | 8,35E-01 | Gm17382       | 1,69 | No  |
| ENSMUSG00000078850 | 6,69E-03  | -0,980420129 | 2,34E-04 | 9,88E-01 | 1,00E+00 | Gm2348        | 1,00 | No  |
| ENSMUSG00000078851 | 6,86E-04  | 2,901625353  | 3,59E-05 | 9,95E-01 | 1,00E+00 | Hist3h2a      | 1,00 | No  |
| ENSMUSG00000078853 | -1,61E-01 | 3,620709831  | 2,81E+00 | 9,39E-02 | 3,84E-01 | Igtp          | 0,89 | No  |
| ENSMUSG00000078861 | -3,12E-01 | 1,630036571  | 3,45E+00 | 6,33E-02 | 3,14E-01 | Zfp931        | 0,81 | No  |
| ENSMUSG00000078862 | -8,65E-02 | 2,81581342   | 5,32E-01 | 4,66E-01 | 7,54E-01 | Gm14326       | 0,94 | No  |
| ENSMUSG00000078864 | 2,59E-01  | -1,015787184 | 3,23E-01 | 5,70E-01 | 8,31E-01 | Gm14322       | 1,20 | No  |
| ENSMUSG00000078865 | 1,81E+00  | -3,10765737  | 1,28E+00 | 2,58E-01 | 5,50E-01 | Gm14406       | 3,49 | No  |
| ENSMUSG00000078866 | 1,45E-01  | 2,015185392  | 1,01E+00 | 3,15E-01 | 6,16E-01 | Zfp970        | 1,11 | No  |
| ENSMUSG00000078867 | 3,87E-01  | -0,305944017 | 1,32E+00 | 2,50E-01 | 5,50E-01 | Gm14418       | 1,31 | No  |
| ENSMUSG00000078868 | -1,34E+00 | -2,770542632 | 1,12E+00 | 2,89E-01 | 5,85E-01 | Gm14412       | 0,40 | No  |
| ENSMUSG00000078869 | -7,07E-01 | -2,997998279 | 2,00E-01 | 6,54E-01 | 8,79E-01 | Gm14409       | 0,61 | No  |
| ENSMUSG00000078870 | 7,09E-03  | 1,988686749  | 2,24E-03 | 9,62E-01 | 1,00E+00 | Gm14410       | 1,00 | No  |



|                    |           |              |          |          |          |               |      |    |
|--------------------|-----------|--------------|----------|----------|----------|---------------|------|----|
| ENSMUSG00000078872 | 1,20E+00  | -3,146123991 | 6,74E-01 | 4,12E-01 | 7,07E-01 | Gm14401       | 2,30 | No |
| ENSMUSG00000078875 | -1,01E-01 | 1,295404193  | 2,94E-01 | 5,88E-01 | 8,40E-01 | Gm14419       | 0,93 | No |
| ENSMUSG00000078877 | -2,48E-02 | 2,083914743  | 2,85E-02 | 8,66E-01 | 9,99E-01 | Gm14295       | 0,98 | No |
| ENSMUSG00000078878 | 7,43E-02  | 2,420205834  | 3,19E-01 | 5,72E-01 | 8,32E-01 | Gm14305       | 1,05 | No |
| ENSMUSG00000078879 | -1,19E-01 | 2,303662197  | 7,45E-01 | 3,88E-01 | 6,88E-01 | Zfp973        | 0,92 | No |
| ENSMUSG00000078880 | -1,12E-01 | 1,825499142  | 5,17E-01 | 4,72E-01 | 7,60E-01 | Gm14308       | 0,93 | No |
| ENSMUSG00000078881 | 7,13E-02  | 1,679553352  | 1,86E-01 | 6,67E-01 | 8,86E-01 | Gm14434       | 1,05 | No |
| ENSMUSG00000078886 | 4,17E-02  | 1,889826325  | 7,11E-02 | 7,90E-01 | 9,54E-01 | Gm2026        | 1,03 | No |
| ENSMUSG00000078887 | 1,84E-01  | 1,803775301  | 1,35E+00 | 2,45E-01 | 5,50E-01 | Gm6710        | 1,14 | No |
| ENSMUSG00000078889 | 9,39E-02  | 1,587034456  | 3,11E-01 | 5,77E-01 | 8,35E-01 | Gm14288       | 1,07 | No |
| ENSMUSG00000078891 | 2,37E-01  | -0,912513731 | 3,18E-01 | 5,73E-01 | 8,32E-01 | Gm11008       | 1,18 | No |
| ENSMUSG00000078894 | 1,09E-01  | 1,895644719  | 4,89E-01 | 4,85E-01 | 7,72E-01 | 2210418O10Rik | 1,08 | No |
| ENSMUSG00000078895 | -1,87E+00 | -3,107637761 | 1,39E+00 | 2,38E-01 | 5,50E-01 | Gm11009       | 0,27 | No |
| ENSMUSG00000078896 | -2,68E-01 | 2,14809071   | 3,57E+00 | 5,90E-02 | 3,00E-01 | Zfp965        | 0,83 | No |
| ENSMUSG00000078897 | 8,46E-02  | 1,71421964   | 2,67E-01 | 6,06E-01 | 8,49E-01 | Gm4724        | 1,06 | No |
| ENSMUSG00000078898 | 5,86E-02  | 1,382800084  | 1,07E-01 | 7,44E-01 | 9,29E-01 | Zfp968        | 1,04 | No |
| ENSMUSG00000078899 | 4,80E-02  | 1,353145844  | 7,02E-02 | 7,91E-01 | 9,55E-01 | Gm4631        | 1,03 | No |
| ENSMUSG00000078901 | 1,83E-01  | 1,731408591  | 1,26E+00 | 2,61E-01 | 5,55E-01 | Gm14440       | 1,14 | No |
| ENSMUSG00000078902 | -2,17E-01 | -1,389697477 | 1,84E-01 | 6,68E-01 | 8,87E-01 | Gm14443       | 0,86 | No |
| ENSMUSG00000078903 | -1,39E-02 | 2,100139566  | 9,31E-03 | 9,23E-01 | 1,00E+00 | Gm14391       | 0,99 | No |
| ENSMUSG00000078905 | 1,03E+00  | -1,641293458 | 3,53E+00 | 6,03E-02 | 3,04E-01 | Gm14393       | 2,04 | No |
| ENSMUSG00000078906 | 6,13E-01  | -3,070153683 | 1,50E-01 | 6,98E-01 | 9,04E-01 | Gm14444       | 1,53 | No |
| ENSMUSG00000078907 | -7,13E-01 | -2,548239305 | 5,68E-01 | 4,51E-01 | 7,41E-01 | Fam186b       | 0,61 | No |
| ENSMUSG00000078908 | -7,78E-02 | 5,247444275  | 1,21E+00 | 2,71E-01 | 5,67E-01 | Mon1b         | 0,95 | No |
| ENSMUSG00000078915 | -1,15E+00 | -2,963255048 | 5,80E-01 | 4,46E-01 | 7,37E-01 | Hsp25-ps1     | 0,45 | No |
| ENSMUSG00000078917 | 4,65E-01  | -2,711720744 | 1,69E-01 | 6,81E-01 | 8,94E-01 | Gm11281       | 1,38 | No |
| ENSMUSG00000078919 | -1,67E-01 | 4,197633073  | 3,87E+00 | 4,92E-02 | 2,68E-01 | Dpm1          | 0,89 | No |
| ENSMUSG00000078920 | -7,42E-02 | 4,543088271  | 8,69E-01 | 3,51E-01 | 6,53E-01 | lfi47         | 0,95 | No |
| ENSMUSG00000078921 | -4,99E-01 | 1,379789025  | 7,73E+00 | 5,45E-03 | 5,95E-02 | Tgtp2         | 0,71 | No |
| ENSMUSG00000078922 | -4,37E-01 | 0,599768372  | 3,48E+00 | 6,23E-02 | 3,11E-01 | Tgtp1         | 0,74 | No |
| ENSMUSG00000078923 | -7,75E-02 | 5,236452016  | 1,17E+00 | 2,79E-01 | 5,75E-01 | Ube2v1        | 0,95 | No |
| ENSMUSG00000078925 | 1,84E+00  | -3,033649193 | 1,33E+00 | 2,49E-01 | 5,50E-01 | D030018L15Rik | 3,58 | No |

|                    |           |              |          |          |          |               |      |     |
|--------------------|-----------|--------------|----------|----------|----------|---------------|------|-----|
| ENSMUSG00000078926 | 1,85E+00  | -3,107657832 | 1,35E+00 | 2,46E-01 | 5,50E-01 | Cdc20b        | 3,61 | No  |
| ENSMUSG00000078931 | 1,99E-01  | 3,68815107   | 4,31E+00 | 3,78E-02 | 2,31E-01 | Pdf           | 1,15 | No  |
| ENSMUSG00000078937 | 2,69E-01  | 1,20284327   | 1,90E+00 | 1,68E-01 | 5,23E-01 | Cpt1b         | 1,20 | No  |
| ENSMUSG00000078941 | -4,36E-02 | 5,079696276  | 3,51E-01 | 5,53E-01 | 8,19E-01 | Ak6           | 0,97 | No  |
| ENSMUSG00000078942 | 9,57E-02  | 5,959511211  | 2,12E+00 | 1,45E-01 | 4,82E-01 | Naip6         | 1,07 | No  |
| ENSMUSG00000078945 | 1,20E-01  | 6,521222174  | 3,69E+00 | 5,46E-02 | 2,86E-01 | Naip2         | 1,09 | No  |
| ENSMUSG00000078952 | 2,00E-01  | -2,311145575 | 5,99E-02 | 8,07E-01 | 9,64E-01 | Lncenc1       | 1,15 | No  |
| ENSMUSG00000078953 | -1,98E-02 | -3,033655952 | 2,83E-11 | 1,00E+00 | 1,00E+00 | Gm11020       | 0,99 | No  |
| ENSMUSG00000078954 | -8,02E-01 | -1,107560534 | 2,70E+00 | 1,00E-01 | 3,92E-01 | Arhgap8       | 0,57 | No  |
| ENSMUSG00000078956 | 9,37E-02  | 1,156152284  | 2,50E-01 | 6,17E-01 | 8,55E-01 | Gm14221       | 1,07 | No  |
| ENSMUSG00000078963 | -1,52E+00 | -2,548192793 | 2,41E+00 | 1,21E-01 | 4,33E-01 | Hsbp1l1       | 0,35 | No  |
| ENSMUSG00000078965 | 8,31E-02  | 7,964487931  | 2,03E+00 | 1,54E-01 | 4,97E-01 | Gm12033       | 1,06 | No  |
| ENSMUSG00000078967 | 3,69E-02  | 5,998437918  | 3,16E-01 | 5,74E-01 | 8,33E-01 | Gm3272        | 1,03 | No  |
| ENSMUSG00000078970 | 8,71E-03  | 4,899976334  | 1,34E-02 | 9,08E-01 | 1,00E+00 | Wdr92         | 1,01 | No  |
| ENSMUSG00000078974 | -9,85E-02 | 1,262767321  | 2,78E-01 | 5,98E-01 | 8,45E-01 | Sec61g        | 0,93 | No  |
| ENSMUSG00000078984 | 1,81E+00  | -3,10765737  | 1,28E+00 | 2,58E-01 | 5,50E-01 | Gm11027       | 3,49 | No  |
| ENSMUSG00000078994 | -6,94E-02 | 2,764953788  | 3,37E-01 | 5,62E-01 | 8,25E-01 | Zfp429        | 0,95 | No  |
| ENSMUSG00000078995 | 1,27E-01  | 1,737891647  | 6,04E-01 | 4,37E-01 | 7,30E-01 | Zfp456        | 1,09 | No  |
| ENSMUSG00000079001 | -3,22E+00 | -2,770613515 | 4,38E+00 | 3,65E-02 | 2,27E-01 | 4930404H24Rik | 0,11 | No  |
| ENSMUSG00000079003 | 1,59E-01  | 5,611981551  | 5,46E+00 | 1,94E-02 | 1,48E-01 | Samd1         | 1,12 | No  |
| ENSMUSG00000079008 | -2,27E+00 | -2,497567472 | 4,19E+00 | 4,05E-02 | 2,38E-01 | Gm14124       | 0,21 | No  |
| ENSMUSG00000079009 | 1,38E+00  | -2,600725539 | 1,97E+00 | 1,61E-01 | 5,09E-01 | Gm14139       | 2,61 | No  |
| ENSMUSG00000079014 | -6,89E-01 | -1,116986214 | 2,46E+00 | 1,17E-01 | 4,23E-01 | Serpina3i     | 0,62 | No  |
| ENSMUSG00000079016 | 1,85E+00  | -3,107657832 | 1,35E+00 | 2,46E-01 | 5,50E-01 | Gm11034       | 3,61 | No  |
| ENSMUSG00000079017 | 2,72E-04  | 5,318110714  | 1,49E-05 | 9,97E-01 | 1,00E+00 | Ifi2712a      | 1,00 | No  |
| ENSMUSG00000079018 | 4,66E-01  | 0,755319941  | 4,12E+00 | 4,25E-02 | 2,45E-01 | Ly6c1         | 1,38 | No  |
| ENSMUSG00000079019 | -4,57E-01 | 0,474434669  | 3,50E+00 | 6,14E-02 | 3,08E-01 | Insl3         | 0,73 | No  |
| ENSMUSG00000079020 | 1,73E-01  | 6,135752523  | 7,17E+00 | 7,42E-03 | 7,49E-02 | Slc45a4       | 1,13 | No  |
| ENSMUSG00000079024 | 1,81E+00  | -3,10765737  | 1,28E+00 | 2,58E-01 | 5,50E-01 | Gm21961       | 3,49 | No  |
| ENSMUSG00000079029 | -2,76E+00 | -1,655078482 | 2,10E+01 | 4,51E-06 | 1,65E-04 | Gm5662        | 0,15 | Yes |
| ENSMUSG00000079031 | -2,70E+00 | -3,033614577 | 2,89E+00 | 8,93E-02 | 3,79E-01 | BB287469      | 0,15 | No  |
| ENSMUSG00000079033 | -8,15E-01 | -2,655140165 | 6,62E-01 | 4,16E-01 | 7,11E-01 | Mef2b         | 0,57 | No  |

|                    |           |              |          |          |          |               |      |     |
|--------------------|-----------|--------------|----------|----------|----------|---------------|------|-----|
| ENSMUSG00000079034 | -1,74E+00 | -1,863691678 | 7,31E+00 | 6,84E-03 | 7,05E-02 | Gm8300        | 0,30 | No  |
| ENSMUSG00000079036 | -7,32E-02 | 5,174512541  | 1,02E+00 | 3,12E-01 | 6,12E-01 | Alkbh1        | 0,95 | No  |
| ENSMUSG00000079037 | -5,58E-01 | 4,454179554  | 4,79E+01 | 4,45E-12 | 5,05E-10 | Prnp          | 0,68 | Yes |
| ENSMUSG00000079038 | -7,22E-01 | 3,103368103  | 4,42E+01 | 2,96E-11 | 2,98E-09 | D130040H23Rik | 0,61 | Yes |
| ENSMUSG00000079043 | 2,02E-01  | 1,924797189  | 1,83E+00 | 1,77E-01 | 5,36E-01 | Fastkd5       | 1,15 | No  |
| ENSMUSG00000079049 | -3,66E-01 | -2,311136858 | 1,69E-01 | 6,81E-01 | 8,94E-01 | Serpinb1c     | 0,78 | No  |
| ENSMUSG00000079051 | -1,25E+00 | -2,655145306 | 1,51E+00 | 2,19E-01 | 5,50E-01 | Gm14025       | 0,42 | No  |
| ENSMUSG00000079053 | 3,91E-01  | -0,896101573 | 7,06E-01 | 4,01E-01 | 6,99E-01 | Gm14010       | 1,31 | No  |
| ENSMUSG00000079055 | -4,87E-02 | -2,896124877 | 1,54E-03 | 9,69E-01 | 1,00E+00 | Slc8a3        | 0,97 | No  |
| ENSMUSG00000079056 | 5,75E-02  | 2,302689164  | 1,79E-01 | 6,72E-01 | 8,89E-01 | Kcnip3        | 1,04 | No  |
| ENSMUSG00000079057 | 7,59E-02  | 5,499465906  | 1,21E+00 | 2,72E-01 | 5,69E-01 | Cyp4v3        | 1,05 | No  |
| ENSMUSG00000079061 | 1,82E+00  | -2,963269943 | 1,32E+00 | 2,51E-01 | 5,50E-01 | Gm11042       | 3,54 | No  |
| ENSMUSG00000079065 | 8,50E-02  | 3,013370115  | 5,71E-01 | 4,50E-01 | 7,40E-01 | BC005561      | 1,06 | No  |
| ENSMUSG00000079067 | 1,70E-02  | 3,754823866  | 3,20E-02 | 8,58E-01 | 9,94E-01 | Hmgn2-ps1     | 1,01 | No  |
| ENSMUSG00000079069 | 4,99E-01  | -2,107675527 | 4,82E-01 | 4,87E-01 | 7,74E-01 | 8430423G03Rik | 1,41 | No  |
| ENSMUSG00000079071 | -1,24E-01 | -0,963169262 | 8,39E-02 | 7,72E-01 | 9,43E-01 | Gm14085       | 0,92 | No  |
| ENSMUSG00000079076 | 4,89E-01  | 1,005434985  | 5,93E+00 | 1,49E-02 | 1,25E-01 | Gm3086        | 1,40 | No  |
| ENSMUSG00000079083 | 2,28E-01  | 3,210445785  | 4,70E+00 | 3,02E-02 | 1,99E-01 | Jrkl          | 1,17 | No  |
| ENSMUSG00000079084 | -1,70E-02 | 6,258474232  | 7,10E-02 | 7,90E-01 | 9,54E-01 | Ccdc82        | 0,99 | No  |
| ENSMUSG00000079101 | 1,72E-02  | 5,070847459  | 5,45E-02 | 8,15E-01 | 9,69E-01 | Gm2904        | 1,01 | No  |
| ENSMUSG00000079103 | -5,05E-02 | -2,77063389  | 1,73E-03 | 9,67E-01 | 1,00E+00 | Tgm7          | 0,97 | No  |
| ENSMUSG00000079104 | -1,96E-02 | 4,715130039  | 6,46E-02 | 7,99E-01 | 9,60E-01 | Prps113       | 0,99 | No  |
| ENSMUSG00000079105 | -7,38E-02 | -3,033659033 | 2,66E-03 | 9,59E-01 | 1,00E+00 | C7            | 0,95 | No  |
| ENSMUSG00000079108 | -6,84E-02 | 5,261653257  | 9,24E-01 | 3,36E-01 | 6,37E-01 | Srp54b        | 0,95 | No  |
| ENSMUSG00000079109 | -2,26E-02 | 3,639824016  | 5,57E-02 | 8,13E-01 | 9,68E-01 | Pms2          | 0,98 | No  |
| ENSMUSG00000079110 | -2,80E-01 | 0,563372645  | 1,35E+00 | 2,45E-01 | 5,50E-01 | Capn3         | 0,82 | No  |
| ENSMUSG00000079111 | 1,82E-01  | 5,793116188  | 7,42E+00 | 6,45E-03 | 6,76E-02 | Kdelr2        | 1,13 | No  |
| ENSMUSG00000079137 | -2,70E-01 | 3,962500824  | 9,15E+00 | 2,49E-03 | 3,32E-02 | Rpl27-ps1     | 0,83 | Yes |
| ENSMUSG00000079138 | -7,67E-02 | 1,148515746  | 1,52E-01 | 6,97E-01 | 9,03E-01 | Gm8818        | 0,95 | No  |
| ENSMUSG00000079139 | -3,48E-01 | 8,336761434  | 3,64E+01 | 1,61E-09 | 1,27E-07 | Gm4204        | 0,79 | Yes |
| ENSMUSG00000079140 | 9,96E-02  | 2,112116973  | 4,78E-01 | 4,89E-01 | 7,76E-01 | Gm6374        | 1,07 | No  |
| ENSMUSG00000079143 | -6,16E-01 | -1,185566647 | 1,70E+00 | 1,92E-01 | 5,50E-01 | Atxn7l1os1    | 0,65 | No  |

|                    |           |              |           |          |          |               |       |     |
|--------------------|-----------|--------------|-----------|----------|----------|---------------|-------|-----|
| ENSMUSG00000079144 | -1,28E-01 | 2,627225286  | 1,07E+00  | 3,00E-01 | 5,96E-01 | A130010J15Rik | 0,91  | No  |
| ENSMUSG00000079146 | -5,69E-02 | -3,107638538 | 1,33E-03  | 9,71E-01 | 1,00E+00 | Gm15353       | 0,96  | No  |
| ENSMUSG00000079162 | 1,40E-01  | -2,107508982 | 3,41E-02  | 8,53E-01 | 9,91E-01 | Trim43b       | 1,10  | No  |
| ENSMUSG00000079164 | -2,98E-01 | 0,087243463  | 1,17E+00  | 2,80E-01 | 5,77E-01 | Tlr5          | 0,81  | No  |
| ENSMUSG00000079165 | -5,70E-02 | 4,245619417  | 4,63E-01  | 4,96E-01 | 7,81E-01 | Sap25         | 0,96  | No  |
| ENSMUSG00000079173 | -5,04E-01 | -1,863527134 | 6,16E-01  | 4,32E-01 | 7,26E-01 | Zan           | 0,70  | No  |
| ENSMUSG00000079177 | -3,76E-02 | 0,266474509  | 1,92E-02  | 8,90E-01 | 1,00E+00 | Fam228a       | 0,97  | No  |
| ENSMUSG00000079179 | -1,63E-01 | 5,009361291  | 4,81E+00  | 2,82E-02 | 1,90E-01 | Rab10os       | 0,89  | No  |
| ENSMUSG00000079184 | 6,73E-02  | 4,423507243  | 6,96E-01  | 4,04E-01 | 7,01E-01 | Mphosph8      | 1,05  | No  |
| ENSMUSG00000079186 | -8,31E-01 | -2,96327241  | 3,77E-01  | 5,39E-01 | 8,09E-01 | Gzmc          | 0,56  | No  |
| ENSMUSG00000079197 | -4,92E-01 | 2,265724974  | 1,34E+01  | 2,51E-04 | 5,26E-03 | Psme2         | 0,71  | Yes |
| ENSMUSG00000079215 | 1,09E-01  | 5,742168492  | 2,63E+00  | 1,05E-01 | 3,97E-01 | Zfp664        | 1,08  | No  |
| ENSMUSG00000079224 | -9,36E-02 | 2,881805387  | 6,51E-01  | 4,20E-01 | 7,15E-01 | Gm6565        | 0,94  | No  |
| ENSMUSG00000079225 | 6,86E-02  | 7,040498666  | 1,28E+00  | 2,57E-01 | 5,50E-01 | Gm9531        | 1,05  | No  |
| ENSMUSG00000079227 | 2,63E-01  | 9,205464805  | 2,14E+01  | 3,75E-06 | 1,42E-04 | Ccr5          | 1,20  | Yes |
| ENSMUSG00000079235 | 1,34E-02  | -2,963213009 | -8,25E-12 | 1,00E+00 | 1,00E+00 | Ccdc13        | 1,01  | No  |
| ENSMUSG00000079242 | -2,77E-01 | 2,111353187  | 3,55E+00  | 5,95E-02 | 3,02E-01 | C730034F03Rik | 0,83  | No  |
| ENSMUSG00000079243 | 3,50E+00  | -2,832056819 | 5,31E+00  | 2,12E-02 | 1,57E-01 | Xirp1         | 11,29 | No  |
| ENSMUSG00000079247 | 2,86E-01  | 1,36034729   | 2,48E+00  | 1,15E-01 | 4,21E-01 | Gm13691       | 1,22  | No  |
| ENSMUSG00000079258 | -1,94E+00 | -3,107619243 | 1,50E+00  | 2,21E-01 | 5,50E-01 | Calhm1        | 0,26  | No  |
| ENSMUSG00000079259 | 1,85E+00  | -3,107657832 | 1,35E+00  | 2,46E-01 | 5,50E-01 | Trim71        | 3,61  | No  |
| ENSMUSG00000079260 | 4,46E-02  | 4,090724683  | 2,64E-01  | 6,07E-01 | 8,50E-01 | Tmppe         | 1,03  | No  |
| ENSMUSG00000079262 | -1,87E+00 | -3,107637761 | 1,39E+00  | 2,38E-01 | 5,50E-01 | Slco1a6       | 0,27  | No  |
| ENSMUSG00000079264 | -1,94E+00 | -3,107619243 | 1,50E+00  | 2,21E-01 | 5,50E-01 | Gm11077       | 0,26  | No  |
| ENSMUSG00000079283 | -1,93E-01 | 1,84921206   | 1,53E+00  | 2,16E-01 | 5,50E-01 | 2310009B15Rik | 0,87  | No  |
| ENSMUSG00000079286 | -6,20E-01 | -1,088751655 | 1,95E+00  | 1,63E-01 | 5,13E-01 | Gm11084       | 0,65  | No  |
| ENSMUSG00000079293 | 1,04E-01  | 9,934226706  | 3,40E+00  | 6,51E-02 | 3,20E-01 | Clec7a        | 1,07  | No  |
| ENSMUSG00000079295 | -2,71E+00 | -3,033620915 | 2,92E+00  | 8,75E-02 | 3,78E-01 | Klrb1-ps1     | 0,15  | No  |
| ENSMUSG00000079298 | 1,77E-01  | 5,014113162  | 5,55E+00  | 1,85E-02 | 1,44E-01 | Klrb1b        | 1,13  | No  |
| ENSMUSG00000079304 | 1,27E-01  | 0,284593025  | 2,29E-01  | 6,33E-01 | 8,65E-01 | 4933413G19Rik | 1,09  | No  |
| ENSMUSG00000079311 | -1,79E-02 | 3,934497318  | 3,90E-02  | 8,43E-01 | 9,85E-01 | Gm3222        | 0,99  | No  |
| ENSMUSG00000079323 | -2,28E-01 | 1,150356412  | 1,42E+00  | 2,33E-01 | 5,50E-01 | Gm20661       | 0,85  | No  |

|                    |           |              |           |          |          |               |      |    |
|--------------------|-----------|--------------|-----------|----------|----------|---------------|------|----|
| ENSMUSG00000079330 | 2,65E+00  | -3,033655087 | 2,73E+00  | 9,86E-02 | 3,91E-01 | Lemd1         | 6,30 | No |
| ENSMUSG00000079333 | 1,21E+00  | -3,07015885  | 6,74E-01  | 4,12E-01 | 7,07E-01 | Gm11096       | 2,31 | No |
| ENSMUSG00000079334 | 9,84E-02  | 3,422375853  | 9,64E-01  | 3,26E-01 | 6,27E-01 | Nat6          | 1,07 | No |
| ENSMUSG00000079339 | -3,62E-01 | 0,28136595   | 1,96E+00  | 1,62E-01 | 5,11E-01 | lfit1bl1      | 0,78 | No |
| ENSMUSG00000079343 | 4,92E-01  | -2,311231094 | 3,28E-01  | 5,67E-01 | 8,29E-01 | C1s2          | 1,41 | No |
| ENSMUSG00000079344 | -1,89E+00 | -3,033648118 | 1,42E+00  | 2,33E-01 | 5,50E-01 | Lipo4         | 0,27 | No |
| ENSMUSG00000079346 | 1,81E+00  | -3,10765737  | 1,28E+00  | 2,58E-01 | 5,50E-01 | 1700013D24Rik | 3,49 | No |
| ENSMUSG00000079355 | 6,08E-02  | 1,473916685  | 1,16E-01  | 7,33E-01 | 9,23E-01 | Ackr4         | 1,04 | No |
| ENSMUSG00000079356 | 4,22E-01  | -2,96325956  | 9,01E-02  | 7,64E-01 | 9,39E-01 | Mettl4-ps1    | 1,34 | No |
| ENSMUSG00000079357 | -1,22E-01 | 2,233328328  | 7,46E-01  | 3,88E-01 | 6,88E-01 | Gm11100       | 0,92 | No |
| ENSMUSG00000079362 | -7,14E-02 | 1,71979324   | 1,95E-01  | 6,59E-01 | 8,81E-01 | Gm43302       | 0,95 | No |
| ENSMUSG00000079363 | -1,71E-01 | 4,293364194  | 4,25E+00  | 3,93E-02 | 2,35E-01 | Gbp4          | 0,89 | No |
| ENSMUSG00000079364 | 7,67E-01  | -2,963261668 | 3,24E-01  | 5,69E-01 | 8,30E-01 | Gm3558        | 1,70 | No |
| ENSMUSG00000079382 | -5,88E-02 | -3,033652696 | 1,62E-03  | 9,68E-01 | 1,00E+00 | Gm3443        | 0,96 | No |
| ENSMUSG00000079383 | 1,85E+00  | -3,107657832 | 1,35E+00  | 2,46E-01 | 5,50E-01 | Gm3298        | 3,61 | No |
| ENSMUSG00000079386 | 2,61E+00  | -3,033672762 | 2,63E+00  | 1,05E-01 | 3,97E-01 | Gm3173        | 6,10 | No |
| ENSMUSG00000079388 | -1,89E+00 | -3,1076441   | 1,42E+00  | 2,33E-01 | 5,50E-01 | 2610042L04Rik | 0,27 | No |
| ENSMUSG00000079391 | -1,87E+00 | -2,963234282 | 1,41E+00  | 2,35E-01 | 5,50E-01 | Gm2974        | 0,27 | No |
| ENSMUSG00000079396 | 1,81E+00  | -2,963282131 | 1,30E+00  | 2,54E-01 | 5,50E-01 | Gm3411        | 3,50 | No |
| ENSMUSG00000079402 | -2,66E+00 | -3,033639428 | 2,81E+00  | 9,35E-02 | 3,83E-01 | Gm3020        | 0,16 | No |
| ENSMUSG00000079407 | 1,86E+00  | -3,033661846 | 1,35E+00  | 2,46E-01 | 5,50E-01 | 1700110I01Rik | 3,62 | No |
| ENSMUSG00000079410 | -8,63E-01 | -2,831945656 | 4,08E-01  | 5,23E-01 | 8,01E-01 | Gm2897        | 0,55 | No |
| ENSMUSG00000079414 | -2,60E-01 | 1,497579692  | 2,15E+00  | 1,43E-01 | 4,78E-01 | Gm11110       | 0,84 | No |
| ENSMUSG00000079415 | 1,20E-01  | 0,179581229  | 1,77E-01  | 6,74E-01 | 8,90E-01 | Cntf          | 1,09 | No |
| ENSMUSG00000079419 | 2,37E-01  | 3,44047099   | 5,36E+00  | 2,06E-02 | 1,54E-01 | Ms4a6c        | 1,18 | No |
| ENSMUSG00000079421 | -1,87E+00 | -3,033619006 | 1,41E+00  | 2,36E-01 | 5,50E-01 | 4930402F06Rik | 0,27 | No |
| ENSMUSG00000079426 | -5,03E-02 | 8,198259966  | 7,57E-01  | 3,84E-01 | 6,86E-01 | Arpc4         | 0,97 | No |
| ENSMUSG00000079427 | -2,13E-01 | 4,795019869  | 7,86E+00  | 5,04E-03 | 5,63E-02 | Mthfsl        | 0,86 | No |
| ENSMUSG00000079429 | 1,96E-02  | 3,479940348  | 3,74E-02  | 8,47E-01 | 9,87E-01 | Mroh2a        | 1,01 | No |
| ENSMUSG00000079433 | 9,01E-03  | -3,107646452 | -5,16E-10 | 1,00E+00 | 1,00E+00 | Gm11114       | 1,01 | No |
| ENSMUSG00000079434 | -3,83E-02 | -3,107651936 | -7,91E-11 | 1,00E+00 | 1,00E+00 | Neu2          | 0,97 | No |
| ENSMUSG00000079436 | 1,53E-01  | -1,614194475 | 7,31E-02  | 7,87E-01 | 9,53E-01 | Kcnj13        | 1,11 | No |

|                    |           |              |          |          |          |               |      |     |
|--------------------|-----------|--------------|----------|----------|----------|---------------|------|-----|
| ENSMUSG00000079442 | 1,45E-01  | 5,889359444  | 4,75E+00 | 2,92E-02 | 1,95E-01 | St6galnac4    | 1,11 | No  |
| ENSMUSG00000079444 | 3,54E-02  | 4,890144343  | 2,19E-01 | 6,40E-01 | 8,70E-01 | Gm21981       | 1,02 | No  |
| ENSMUSG00000079445 | 1,87E-01  | 5,087082652  | 6,39E+00 | 1,15E-02 | 1,03E-01 | B3gnt7        | 1,14 | No  |
| ENSMUSG00000079451 | -1,89E+00 | -3,1076441   | 1,42E+00 | 2,33E-01 | 5,50E-01 | Tmprss11g     | 0,27 | No  |
| ENSMUSG00000079455 | -4,16E-01 | 0,30738232   | 2,58E+00 | 1,08E-01 | 4,03E-01 | Gm16026       | 0,75 | No  |
| ENSMUSG00000079457 | -4,76E-01 | 0,438729271  | 3,52E+00 | 6,05E-02 | 3,05E-01 | Gm7609        | 0,72 | No  |
| ENSMUSG00000079462 | -1,16E+00 | -2,997970125 | 5,91E-01 | 4,42E-01 | 7,34E-01 | Gm15737       | 0,45 | No  |
| ENSMUSG00000079465 | -6,14E-01 | -2,311153877 | 5,14E-01 | 4,73E-01 | 7,61E-01 | Col4a3        | 0,65 | No  |
| ENSMUSG00000079467 | 3,73E-01  | 0,26151137   | 2,05E+00 | 1,52E-01 | 4,94E-01 | Gm14966       | 1,30 | No  |
| ENSMUSG00000079469 | 4,69E-02  | 4,438732934  | 3,37E-01 | 5,62E-01 | 8,25E-01 | Pigb          | 1,03 | No  |
| ENSMUSG00000079470 | 6,92E-01  | 4,152457655  | 6,40E+01 | 1,24E-15 | 2,04E-13 | Utp14b        | 1,62 | Yes |
| ENSMUSG00000079477 | 2,24E-02  | 8,899801425  | 1,55E-01 | 6,94E-01 | 9,02E-01 | Rab7          | 1,02 | No  |
| ENSMUSG00000079478 | 1,07E-01  | 5,552311483  | 2,44E+00 | 1,18E-01 | 4,27E-01 | Sssca1        | 1,08 | No  |
| ENSMUSG00000079484 | -1,17E-01 | 0,577150126  | 2,32E-01 | 6,30E-01 | 8,62E-01 | Phyhd1        | 0,92 | No  |
| ENSMUSG00000079491 | -1,78E-01 | 3,073742242  | 2,71E+00 | 9,98E-02 | 3,92E-01 | H2-T10        | 0,88 | No  |
| ENSMUSG00000079492 | -2,80E-01 | 3,127751138  | 6,68E+00 | 9,75E-03 | 9,16E-02 | Gm11127       | 0,82 | No  |
| ENSMUSG00000079494 | -1,94E+00 | -3,107619243 | 1,50E+00 | 2,21E-01 | 5,50E-01 | Nat8f5        | 0,26 | No  |
| ENSMUSG00000079497 | -9,83E-01 | -2,311122782 | 1,17E+00 | 2,79E-01 | 5,76E-01 | Gm13420       | 0,51 | No  |
| ENSMUSG00000079499 | -1,36E-01 | 5,099046922  | 3,50E+00 | 6,14E-02 | 3,08E-01 | 6530402F18Rik | 0,91 | No  |
| ENSMUSG00000079501 | 1,21E-01  | 6,218197607  | 3,54E+00 | 5,98E-02 | 3,03E-01 | Gm5138        | 1,09 | No  |
| ENSMUSG00000079502 | 1,20E+00  | -2,655165226 | 8,97E-01 | 3,43E-01 | 6,44E-01 | Cfap77        | 2,30 | No  |
| ENSMUSG00000079505 | -3,19E-01 | 3,798448089  | 1,21E+01 | 5,12E-04 | 9,35E-03 | Gm11131       | 0,80 | Yes |
| ENSMUSG00000079507 | -1,59E-01 | 4,737041501  | 4,32E+00 | 3,78E-02 | 2,31E-01 | H2-Q1         | 0,90 | No  |
| ENSMUSG00000079511 | 1,04E-01  | 3,689950917  | 1,20E+00 | 2,74E-01 | 5,70E-01 | Gm42688       | 1,07 | No  |
| ENSMUSG00000079523 | 5,95E-02  | 6,958776191  | 9,54E-01 | 3,29E-01 | 6,29E-01 | Tmsb10        | 1,04 | No  |
| ENSMUSG00000079546 | -1,94E+00 | -3,107619243 | 1,50E+00 | 2,21E-01 | 5,50E-01 | Gm11146       | 0,26 | No  |
| ENSMUSG00000079547 | 1,38E-01  | 8,812432229  | 5,84E+00 | 1,57E-02 | 1,30E-01 | H2-DMb1       | 1,10 | No  |
| ENSMUSG00000079550 | 2,48E-01  | 1,375712244  | 1,85E+00 | 1,74E-01 | 5,32E-01 | Mpp4          | 1,19 | No  |
| ENSMUSG00000079553 | 2,62E-01  | 5,259028902  | 1,34E+01 | 2,49E-04 | 5,23E-03 | Kifc1         | 1,20 | Yes |
| ENSMUSG00000079554 | 8,85E-02  | -1,165707153 | 3,29E-02 | 8,56E-01 | 9,93E-01 | Aox2          | 1,06 | No  |
| ENSMUSG00000079555 | -1,09E-02 | 4,328371577  | 1,75E-02 | 8,95E-01 | 1,00E+00 | Haus3         | 0,99 | No  |
| ENSMUSG00000079557 | -1,20E-02 | 6,176420445  | 3,49E-02 | 8,52E-01 | 9,90E-01 | March2        | 0,99 | No  |

|                    |           |              |           |          |          |               |      |     |
|--------------------|-----------|--------------|-----------|----------|----------|---------------|------|-----|
| ENSMUSG00000079560 | -2,70E-02 | -2,473432635 | 8,83E-04  | 9,76E-01 | 1,00E+00 | Hoxa3         | 0,98 | No  |
| ENSMUSG00000079562 | -9,22E-02 | 6,883595895  | 2,28E+00  | 1,31E-01 | 4,55E-01 | Maea          | 0,94 | No  |
| ENSMUSG00000079563 | 1,38E-02  | -0,52275864  | 1,46E-03  | 9,70E-01 | 1,00E+00 | Pglyrp2       | 1,01 | No  |
| ENSMUSG00000079564 | 2,15E-01  | -2,832010729 | 3,37E-02  | 8,54E-01 | 9,92E-01 | Gm11149       | 1,16 | No  |
| ENSMUSG00000079575 | -1,39E-01 | 7,556732446  | 5,52E+00  | 1,88E-02 | 1,45E-01 | Rbpsuh-rs3    | 0,91 | No  |
| ENSMUSG00000079580 | 1,07E-01  | -1,770635    | 2,50E-02  | 8,74E-01 | 1,00E+00 | Tmem217       | 1,08 | No  |
| ENSMUSG00000079592 | -5,28E-03 | -3,045959076 | 5,58E-12  | 1,00E+00 | 1,00E+00 | C1qtnf5       | 1,00 | No  |
| ENSMUSG00000079594 | -5,10E-01 | -2,800923688 | 1,31E-01  | 7,18E-01 | 9,14E-01 | BC117090      | 0,70 | No  |
| ENSMUSG00000079597 | -1,56E-01 | 2,646062851  | 1,57E+00  | 2,10E-01 | 5,50E-01 | Gm5483        | 0,90 | No  |
| ENSMUSG00000079598 | 5,83E-01  | 3,248462059  | 2,90E+01  | 7,28E-08 | 4,18E-06 | Clec2l        | 1,50 | Yes |
| ENSMUSG00000079602 | 1,17E+00  | -3,14612376  | 6,40E-01  | 4,24E-01 | 7,18E-01 | 9230102004Rik | 2,26 | No  |
| ENSMUSG00000079605 | 5,21E-02  | 2,726816086  | 1,91E-01  | 6,62E-01 | 8,83E-01 | Zbtb9         | 1,04 | No  |
| ENSMUSG00000079608 | -4,69E-01 | 0,006647279  | 2,48E+00  | 1,15E-01 | 4,20E-01 | Stard6        | 0,72 | No  |
| ENSMUSG00000079610 | -1,35E-02 | 2,887726584  | 1,37E-02  | 9,07E-01 | 1,00E+00 | Ankrd39       | 0,99 | No  |
| ENSMUSG00000079614 | 1,57E-01  | 5,937013789  | 5,69E+00  | 1,71E-02 | 1,36E-01 | Seh1l         | 1,11 | No  |
| ENSMUSG00000079620 | -3,83E-02 | -3,107651936 | -7,91E-11 | 1,00E+00 | 1,00E+00 | Muc4          | 0,97 | No  |
| ENSMUSG00000079625 | -4,17E-01 | 2,656642903  | 1,15E+01  | 6,96E-04 | 1,20E-02 | Tm4sf19       | 0,75 | Yes |
| ENSMUSG00000079644 | 6,03E-01  | -2,600741335 | 4,06E-01  | 5,24E-01 | 8,01E-01 | Gm1110        | 1,52 | No  |
| ENSMUSG00000079645 | -1,47E-01 | -0,614241747 | 1,90E-01  | 6,63E-01 | 8,83E-01 | Gm17193       | 0,90 | No  |
| ENSMUSG00000079652 | -1,01E+00 | -1,96317634  | 1,57E+00  | 2,10E-01 | 5,50E-01 | Fam71f2       | 0,50 | No  |
| ENSMUSG00000079654 | 1,84E+00  | -3,033632273 | 1,33E+00  | 2,49E-01 | 5,50E-01 | Prrt4         | 3,58 | No  |
| ENSMUSG00000079657 | -5,03E-01 | 0,019652956  | 3,17E+00  | 7,51E-02 | 3,49E-01 | Rab26         | 0,71 | No  |
| ENSMUSG00000079658 | -1,52E-01 | 5,382127241  | 4,70E+00  | 3,01E-02 | 1,99E-01 | Eloc          | 0,90 | No  |
| ENSMUSG00000079659 | 7,84E-02  | 4,632868172  | 9,95E-01  | 3,19E-01 | 6,19E-01 | Tmem243       | 1,06 | No  |
| ENSMUSG00000079671 | 6,07E-01  | 0,148520812  | 4,42E+00  | 3,55E-02 | 2,23E-01 | 2610203C22Rik | 1,52 | No  |
| ENSMUSG00000079677 | 2,94E-02  | 3,028329101  | 6,88E-02  | 7,93E-01 | 9,56E-01 | Fdx1l         | 1,02 | No  |
| ENSMUSG00000079681 | 2,05E-01  | -1,831956519 | 8,51E-02  | 7,70E-01 | 9,42E-01 | Zglp1         | 1,15 | No  |
| ENSMUSG00000079685 | 7,24E-02  | 7,484893949  | 1,49E+00  | 2,22E-01 | 5,50E-01 | Ulbp1         | 1,05 | No  |
| ENSMUSG00000079700 | 2,13E+00  | -2,770604555 | 2,47E+00  | 1,16E-01 | 4,21E-01 | Fpr3          | 4,38 | No  |
| ENSMUSG00000079707 | -3,13E-01 | -1,44071963  | 3,60E-01  | 5,48E-01 | 8,15E-01 | Tcte3         | 0,80 | No  |
| ENSMUSG00000079710 | -3,05E-02 | -0,468917142 | 7,57E-03  | 9,31E-01 | 1,00E+00 | Gm3448        | 0,98 | No  |
| ENSMUSG00000079711 | 7,28E-01  | -2,831991672 | 2,89E-01  | 5,91E-01 | 8,41E-01 | Smok4a        | 1,66 | No  |

|                    |           |              |           |          |          |               |      |     |
|--------------------|-----------|--------------|-----------|----------|----------|---------------|------|-----|
| ENSMUSG00000079722 | 8,37E-01  | -2,268069782 | 8,42E-01  | 3,59E-01 | 6,60E-01 | Ttll2         | 1,79 | No  |
| ENSMUSG00000079737 | -4,43E-02 | 2,678703348  | 1,25E-01  | 7,24E-01 | 9,17E-01 | 3110001I22Rik | 0,97 | No  |
| ENSMUSG00000079741 | -1,94E+00 | -3,107619243 | 1,50E+00  | 2,21E-01 | 5,50E-01 | Nlrp4g        | 0,26 | No  |
| ENSMUSG00000079884 | 1,58E-02  | 7,092517549  | 6,83E-02  | 7,94E-01 | 9,56E-01 | Gm10698       | 1,01 | No  |
| ENSMUSG00000079889 | -1,20E-01 | -0,079601181 | 1,35E-01  | 7,13E-01 | 9,11E-01 | Gm11951       | 0,92 | No  |
| ENSMUSG00000079906 | -1,15E-01 | -0,088475151 | 1,36E-01  | 7,12E-01 | 9,11E-01 | Gm15846       | 0,92 | No  |
| ENSMUSG00000079915 | 5,75E-01  | -1,831975368 | 7,52E-01  | 3,86E-01 | 6,87E-01 | Gm16073       | 1,49 | No  |
| ENSMUSG00000079941 | -2,04E-02 | 6,738780571  | 1,10E-01  | 7,40E-01 | 9,27E-01 | Gm11273       | 0,99 | No  |
| ENSMUSG00000079942 | -2,09E-01 | 5,664797991  | 9,52E+00  | 2,03E-03 | 2,83E-02 | Rpl28-ps3     | 0,87 | Yes |
| ENSMUSG00000079962 | -1,34E+00 | -2,655110494 | 1,12E+00  | 2,89E-01 | 5,85E-01 | Gm12643       | 0,40 | No  |
| ENSMUSG00000079988 | 4,42E-02  | -1,600748872 | 6,15E-03  | 9,37E-01 | 1,00E+00 | Gm11970       | 1,03 | No  |
| ENSMUSG00000079993 | -3,83E-02 | -3,107651936 | -7,91E-11 | 1,00E+00 | 1,00E+00 | Gm11799       | 0,97 | No  |
| ENSMUSG00000080002 | 1,69E-02  | 6,302891961  | 6,98E-02  | 7,92E-01 | 9,55E-01 | Gm5566        | 1,01 | No  |
| ENSMUSG00000080006 | -1,71E-01 | 1,306669622  | 8,66E-01  | 3,52E-01 | 6,53E-01 | Rps19-ps7     | 0,89 | No  |
| ENSMUSG00000080021 | -1,70E-01 | 4,957914981  | 5,20E+00  | 2,26E-02 | 1,64E-01 | Gm5915        | 0,89 | No  |
| ENSMUSG00000080054 | 6,84E-01  | -0,937911701 | 3,02E+00  | 8,21E-02 | 3,68E-01 | Rpl12-ps1     | 1,61 | No  |
| ENSMUSG00000080058 | 2,23E-01  | 7,164249873  | 1,37E+01  | 2,16E-04 | 4,63E-03 | Gm11175       | 1,17 | Yes |
| ENSMUSG00000080059 | -3,29E-01 | 2,917393937  | 8,32E+00  | 3,91E-03 | 4,66E-02 | Rps19-ps3     | 0,80 | Yes |
| ENSMUSG00000080076 | -6,53E-02 | -2,146110704 | 6,40E-03  | 9,36E-01 | 1,00E+00 | Hist1h2aj     | 0,96 | No  |
| ENSMUSG00000080078 | 2,65E-01  | 3,213075506  | 6,53E+00  | 1,06E-02 | 9,75E-02 | Gm15583       | 1,20 | No  |
| ENSMUSG00000080115 | 2,80E-01  | -1,561146596 | 2,77E-01  | 5,99E-01 | 8,46E-01 | Eef1akmt3     | 1,21 | No  |
| ENSMUSG00000080152 | -8,54E-01 | -2,831999582 | 4,00E-01  | 5,27E-01 | 8,03E-01 | Gm12260       | 0,55 | No  |
| ENSMUSG00000080180 | 6,61E-01  | -1,832100253 | 1,03E+00  | 3,10E-01 | 6,09E-01 | Gm17235       | 1,58 | No  |
| ENSMUSG00000080198 | 2,20E-02  | 0,112167119  | 5,84E-03  | 9,39E-01 | 1,00E+00 | Gm13573       | 1,02 | No  |
| ENSMUSG00000080205 | -1,18E-01 | 2,822006388  | 9,95E-01  | 3,19E-01 | 6,19E-01 | Gm15526       | 0,92 | No  |
| ENSMUSG00000080223 | 8,83E-02  | 1,628687638  | 2,62E-01  | 6,09E-01 | 8,51E-01 | Gm13768       | 1,06 | No  |
| ENSMUSG00000080237 | -3,84E-01 | -0,946088666 | 8,40E-01  | 3,59E-01 | 6,61E-01 | Gm14239       | 0,77 | No  |
| ENSMUSG00000080242 | 4,00E-02  | 8,925551366  | 4,91E-01  | 4,83E-01 | 7,71E-01 | Gm15487       | 1,03 | No  |
| ENSMUSG00000080268 | -4,40E-03 | 5,31909095   | 3,85E-03  | 9,51E-01 | 1,00E+00 | Brms1         | 1,00 | No  |
| ENSMUSG00000080303 | -2,55E-02 | 0,302627562  | 9,34E-03  | 9,23E-01 | 1,00E+00 | Gm12419       | 0,98 | No  |
| ENSMUSG00000080316 | -1,98E-01 | 1,304558418  | 1,19E+00  | 2,76E-01 | 5,73E-01 | Spaca6        | 0,87 | No  |
| ENSMUSG00000080334 | 1,85E+00  | -3,107657832 | 1,35E+00  | 2,46E-01 | 5,50E-01 | Gm25110       | 3,61 | No  |



|                    |           |              |           |          |          |          |      |    |
|--------------------|-----------|--------------|-----------|----------|----------|----------|------|----|
| ENSMUSG00000080342 | -2,20E-01 | -0,778162179 | 2,90E-01  | 5,90E-01 | 8,41E-01 | Gm24589  | 0,86 | No |
| ENSMUSG00000080350 | 1,24E+00  | -2,770607092 | 9,48E-01  | 3,30E-01 | 6,31E-01 | Gm26248  | 2,36 | No |
| ENSMUSG00000080352 | 7,58E-02  | 2,331171211  | 3,03E-01  | 5,82E-01 | 8,38E-01 | Gm26247  | 1,05 | No |
| ENSMUSG00000080358 | 9,01E-03  | -3,107646452 | -5,16E-10 | 1,00E+00 | 1,00E+00 | Gm26249  | 1,01 | No |
| ENSMUSG00000080363 | 1,87E+00  | -3,03364371  | 1,36E+00  | 2,43E-01 | 5,50E-01 | Gm25778  | 3,66 | No |
| ENSMUSG00000080364 | -1,55E-01 | -0,424868595 | 2,00E-01  | 6,54E-01 | 8,79E-01 | Gm25777  | 0,90 | No |
| ENSMUSG00000080365 | -5,08E-01 | -0,879762904 | 1,61E+00  | 2,05E-01 | 5,50E-01 | Gm25776  | 0,70 | No |
| ENSMUSG00000080366 | -2,73E+00 | -2,963241672 | 2,94E+00  | 8,62E-02 | 3,78E-01 | Gm25775  | 0,15 | No |
| ENSMUSG00000080370 | 7,63E-01  | -2,289522746 | 1,04E+00  | 3,08E-01 | 6,06E-01 | Gm22952  | 1,70 | No |
| ENSMUSG00000080374 | -4,30E-02 | 4,068839075  | 2,36E-01  | 6,27E-01 | 8,61E-01 | Gm22953  | 0,97 | No |
| ENSMUSG00000080384 | -2,70E+00 | -3,033614577 | 2,89E+00  | 8,93E-02 | 3,79E-01 | Gm22105  | 0,15 | No |
| ENSMUSG00000080396 | -3,91E-01 | -2,05171109  | 2,55E-01  | 6,13E-01 | 8,53E-01 | Snord111 | 0,76 | No |
| ENSMUSG00000080413 | 6,50E-01  | -2,65511384  | 3,49E-01  | 5,54E-01 | 8,20E-01 | Gm26473  | 1,57 | No |
| ENSMUSG00000080440 | 1,07E+00  | -2,355538449 | 1,47E+00  | 2,25E-01 | 5,50E-01 | Gm25848  | 2,10 | No |
| ENSMUSG00000080441 | -1,88E-01 | -2,126798423 | 5,12E-02  | 8,21E-01 | 9,72E-01 | Mir1249  | 0,88 | No |
| ENSMUSG00000080451 | 3,19E-01  | -2,548267541 | 1,03E-01  | 7,48E-01 | 9,30E-01 | Gm24193  | 1,25 | No |
| ENSMUSG00000080452 | 2,50E-01  | 0,500078169  | 1,08E+00  | 2,99E-01 | 5,95E-01 | Mir1306  | 1,19 | No |
| ENSMUSG00000080454 | -5,32E-01 | -1,683101693 | 8,01E-01  | 3,71E-01 | 6,72E-01 | Gm24195  | 0,69 | No |
| ENSMUSG00000080455 | -2,73E-02 | -2,963256629 | 3,40E-04  | 9,85E-01 | 1,00E+00 | Gm24194  | 0,98 | No |
| ENSMUSG00000080461 | -4,04E-01 | -1,740753496 | 5,11E-01  | 4,75E-01 | 7,63E-01 | Gm22488  | 0,76 | No |
| ENSMUSG00000080463 | -1,52E-01 | -0,704653975 | 1,51E-01  | 6,97E-01 | 9,03E-01 | Gm22489  | 0,90 | No |
| ENSMUSG00000080465 | 2,59E-01  | -1,946133753 | 1,47E-01  | 7,01E-01 | 9,05E-01 | Gm22486  | 1,20 | No |
| ENSMUSG00000080469 | 3,83E-01  | -0,038524071 | 1,65E+00  | 1,99E-01 | 5,50E-01 | Snord98  | 1,30 | No |
| ENSMUSG00000080473 | -7,15E-02 | -2,401408398 | 7,07E-03  | 9,33E-01 | 1,00E+00 | Gm25315  | 0,95 | No |
| ENSMUSG00000080478 | -4,16E-01 | -2,146154324 | 2,89E-01  | 5,91E-01 | 8,41E-01 | Snord23  | 0,75 | No |
| ENSMUSG00000080485 | 1,33E-01  | -2,146091021 | 3,08E-02  | 8,61E-01 | 9,96E-01 | Gm23493  | 1,10 | No |
| ENSMUSG00000080486 | 2,27E-01  | 0,443081022  | 8,16E-01  | 3,66E-01 | 6,67E-01 | Snord100 | 1,17 | No |
| ENSMUSG00000080506 | -1,89E+00 | -2,896152932 | 1,43E+00  | 2,31E-01 | 5,50E-01 | Gm25042  | 0,27 | No |
| ENSMUSG00000080516 | -1,89E+00 | -3,1076441   | 1,42E+00  | 2,33E-01 | 5,50E-01 | Gm22197  | 0,27 | No |
| ENSMUSG00000080517 | 1,81E+00  | -3,10765737  | 1,28E+00  | 2,58E-01 | 5,50E-01 | Gm23109  | 3,49 | No |
| ENSMUSG00000080518 | -1,17E+00 | -2,963236728 | 5,92E-01  | 4,42E-01 | 7,34E-01 | Gm22193  | 0,45 | No |
| ENSMUSG00000080527 | -1,24E-01 | -0,19572978  | 1,50E-01  | 6,99E-01 | 9,04E-01 | Gm23880  | 0,92 | No |

|                    |           |              |           |          |          |              |      |    |
|--------------------|-----------|--------------|-----------|----------|----------|--------------|------|----|
| ENSMUSG00000080530 | -2,51E-01 | -1,246941928 | 2,89E-01  | 5,91E-01 | 8,41E-01 | Gm25540      | 0,84 | No |
| ENSMUSG00000080533 | 1,14E+00  | -1,980544725 | 2,66E+00  | 1,03E-01 | 3,95E-01 | Mir1191      | 2,21 | No |
| ENSMUSG00000080538 | -1,88E+00 | -2,896153786 | 1,42E+00  | 2,33E-01 | 5,50E-01 | Gm25541      | 0,27 | No |
| ENSMUSG00000080540 | 1,22E+00  | -3,146114919 | 6,90E-01  | 4,06E-01 | 7,02E-01 | Gm22711      | 2,33 | No |
| ENSMUSG00000080542 | -1,37E+00 | -2,83199071  | 1,18E+00  | 2,77E-01 | 5,74E-01 | Gm22710      | 0,39 | No |
| ENSMUSG00000080543 | -3,88E-03 | -3,03362684  | 4,02E-12  | 1,00E+00 | 1,00E+00 | Gm22709      | 1,00 | No |
| ENSMUSG00000080562 | 9,01E-03  | -3,107646452 | -5,16E-10 | 1,00E+00 | 1,00E+00 | Gm26043      | 1,01 | No |
| ENSMUSG00000080573 | -1,90E+00 | -2,963239763 | 1,44E+00  | 2,31E-01 | 5,50E-01 | Mir467f      | 0,27 | No |
| ENSMUSG00000080574 | 5,76E-01  | -1,333386023 | 1,25E+00  | 2,64E-01 | 5,59E-01 | Mir466i      | 1,49 | No |
| ENSMUSG00000080594 | -1,87E+00 | -3,107637761 | 1,39E+00  | 2,38E-01 | 5,50E-01 | Mir669h      | 0,27 | No |
| ENSMUSG00000080597 | -1,87E+00 | -3,107637761 | 1,39E+00  | 2,38E-01 | 5,50E-01 | Gm22033      | 0,27 | No |
| ENSMUSG00000080609 | -1,94E+00 | -3,107619243 | 1,50E+00  | 2,21E-01 | 5,50E-01 | Gm23844      | 0,26 | No |
| ENSMUSG00000080610 | 9,54E-01  | -2,051804567 | 1,74E+00  | 1,87E-01 | 5,50E-01 | Snord110     | 1,94 | No |
| ENSMUSG00000080613 | 1,02E+00  | -1,963285657 | 2,04E+00  | 1,53E-01 | 4,96E-01 | Gm22151      | 2,03 | No |
| ENSMUSG00000080615 | -1,19E-01 | -1,322172196 | 5,55E-02  | 8,14E-01 | 9,68E-01 | Snord99      | 0,92 | No |
| ENSMUSG00000080626 | 1,03E+00  | -1,963313661 | 1,71E+00  | 1,91E-01 | 5,50E-01 | Mir1192      | 2,04 | No |
| ENSMUSG00000080657 | -1,87E+00 | -3,107637761 | 1,39E+00  | 2,38E-01 | 5,50E-01 | Mir669i      | 0,27 | No |
| ENSMUSG00000080659 | -5,39E-02 | -2,832014942 | 1,32E-03  | 9,71E-01 | 1,00E+00 | Gm24484      | 0,96 | No |
| ENSMUSG00000080662 | -9,32E-02 | -2,600756511 | 5,67E-03  | 9,40E-01 | 1,00E+00 | Mir1b        | 0,94 | No |
| ENSMUSG00000080665 | -5,87E-01 | -2,655132158 | 2,70E-01  | 6,03E-01 | 8,48E-01 | Mir1199      | 0,67 | No |
| ENSMUSG00000080669 | -2,49E-02 | -3,146121042 | -4,44E-11 | 1,00E+00 | 1,00E+00 | Mir1224      | 0,98 | No |
| ENSMUSG00000080678 | 1,87E+00  | -3,107639691 | 1,38E+00  | 2,40E-01 | 5,50E-01 | Gm23334      | 3,67 | No |
| ENSMUSG00000080683 | -4,89E-02 | 2,24236882   | 1,19E-01  | 7,31E-01 | 9,21E-01 | Gm23991      | 0,97 | No |
| ENSMUSG00000080700 | -1,18E+00 | -2,070127086 | 1,81E+00  | 1,79E-01 | 5,39E-01 | Gm15981      | 0,44 | No |
| ENSMUSG00000080701 | -2,66E+00 | -2,831960321 | 2,82E+00  | 9,31E-02 | 3,83E-01 | Gm12340      | 0,16 | No |
| ENSMUSG00000080703 | -1,87E+00 | -3,107637761 | 1,39E+00  | 2,38E-01 | 5,50E-01 | Gm13183      | 0,27 | No |
| ENSMUSG00000080708 | 1,01E-01  | 4,325676642  | 1,46E+00  | 2,27E-01 | 5,50E-01 | Ccnd3-ps     | 1,07 | No |
| ENSMUSG00000080709 | 1,87E+00  | -3,107639691 | 1,38E+00  | 2,40E-01 | 5,50E-01 | Gm14324      | 3,67 | No |
| ENSMUSG00000080711 | 1,81E+00  | -3,10765737  | 1,28E+00  | 2,58E-01 | 5,50E-01 | Gm11686      | 3,49 | No |
| ENSMUSG00000080712 | 6,04E-01  | -2,133353639 | 8,40E-01  | 3,59E-01 | 6,61E-01 | Hist3h2bb-ps | 1,52 | No |
| ENSMUSG00000080715 | -3,14E-01 | 2,872949221  | 7,39E+00  | 6,57E-03 | 6,85E-02 | Gm5406       | 0,80 | No |
| ENSMUSG00000080716 | 6,13E-02  | 4,674718013  | 6,12E-01  | 4,34E-01 | 7,27E-01 | Gm13503      | 1,04 | No |

|                    |           |              |           |          |          |               |      |     |
|--------------------|-----------|--------------|-----------|----------|----------|---------------|------|-----|
| ENSMUSG00000080717 | -9,86E-03 | 1,025915267  | 2,39E-03  | 9,61E-01 | 1,00E+00 | B230307C23Rik | 0,99 | No  |
| ENSMUSG00000080719 | 1,63E+00  | -2,770634521 | 1,83E+00  | 1,76E-01 | 5,36E-01 | Gm15532       | 3,10 | No  |
| ENSMUSG00000080720 | 2,37E-01  | -0,946050009 | 2,61E-01  | 6,10E-01 | 8,51E-01 | Gm16077       | 1,18 | No  |
| ENSMUSG00000080723 | -9,23E-02 | -2,401414577 | 7,60E-03  | 9,31E-01 | 1,00E+00 | Gm12564       | 0,94 | No  |
| ENSMUSG00000080726 | -7,03E-02 | -1,40135052  | 2,20E-02  | 8,82E-01 | 1,00E+00 | Gm15366       | 0,95 | No  |
| ENSMUSG00000080727 | 4,39E-01  | 2,683541861  | 1,18E+01  | 5,79E-04 | 1,04E-02 | C920021L13Rik | 1,36 | Yes |
| ENSMUSG00000080731 | 1,94E-01  | -0,485253762 | 2,89E-01  | 5,91E-01 | 8,41E-01 | Rps2-ps9      | 1,14 | No  |
| ENSMUSG00000080738 | -5,14E-02 | -2,770612208 | 2,33E-03  | 9,61E-01 | 1,00E+00 | Mup-ps22      | 0,97 | No  |
| ENSMUSG00000080741 | -5,94E-01 | -1,770577837 | 1,01E+00  | 3,14E-01 | 6,14E-01 | Gm11398       | 0,66 | No  |
| ENSMUSG00000080746 | -2,42E-01 | 6,735910437  | 1,54E+01  | 8,88E-05 | 2,20E-03 | Rpsa-ps12     | 0,85 | Yes |
| ENSMUSG00000080747 | 1,24E-01  | 5,114335961  | 2,87E+00  | 9,03E-02 | 3,81E-01 | Gm14016       | 1,09 | No  |
| ENSMUSG00000080753 | -9,94E-01 | -2,070175555 | 1,86E+00  | 1,73E-01 | 5,30E-01 | Gm15613       | 0,50 | No  |
| ENSMUSG00000080759 | 1,25E-01  | 2,10597421   | 7,41E-01  | 3,89E-01 | 6,90E-01 | Gm15573       | 1,09 | No  |
| ENSMUSG00000080763 | 3,77E-02  | -1,098061634 | 6,90E-03  | 9,34E-01 | 1,00E+00 | Gm12341       | 1,03 | No  |
| ENSMUSG00000080767 | -3,83E-02 | -3,107651936 | -7,91E-11 | 1,00E+00 | 1,00E+00 | Gm15595       | 0,97 | No  |
| ENSMUSG00000080768 | 1,49E-01  | -0,548216627 | 1,63E-01  | 6,86E-01 | 8,97E-01 | Gm12219       | 1,11 | No  |
| ENSMUSG00000080770 | -1,89E+00 | -3,1076441   | 1,42E+00  | 2,33E-01 | 5,50E-01 | Gm11278       | 0,27 | No  |
| ENSMUSG00000080772 | 1,51E-01  | 5,658918044  | 4,93E+00  | 2,63E-02 | 1,82E-01 | Gm12543       | 1,11 | No  |
| ENSMUSG00000080773 | 2,72E-01  | -0,535359791 | 5,21E-01  | 4,70E-01 | 7,59E-01 | Gm12955       | 1,21 | No  |
| ENSMUSG00000080776 | -1,71E-01 | 8,437432951  | 8,88E+00  | 2,89E-03 | 3,72E-02 | Gm12174       | 0,89 | Yes |
| ENSMUSG00000080779 | 7,37E-01  | -2,832043984 | 2,96E-01  | 5,87E-01 | 8,40E-01 | Gm8731        | 1,67 | No  |
| ENSMUSG00000080782 | -1,90E+00 | -2,896159266 | 1,44E+00  | 2,30E-01 | 5,50E-01 | Gm13495       | 0,27 | No  |
| ENSMUSG00000080783 | -3,01E-01 | 1,8348139    | 3,78E+00  | 5,20E-02 | 2,78E-01 | Gm8250        | 0,81 | No  |
| ENSMUSG00000080785 | -8,07E-01 | -2,831983513 | 3,58E-01  | 5,50E-01 | 8,17E-01 | Gm11591       | 0,57 | No  |
| ENSMUSG00000080789 | -1,87E+00 | -3,107637761 | 1,39E+00  | 2,38E-01 | 5,50E-01 | Gm14007       | 0,27 | No  |
| ENSMUSG00000080790 | 1,03E+00  | -2,146108544 | 1,71E+00  | 1,92E-01 | 5,50E-01 | Gm7638        | 2,04 | No  |
| ENSMUSG00000080791 | -8,83E-02 | 2,426891137  | 4,41E-01  | 5,06E-01 | 7,91E-01 | Akirin1-ps    | 0,94 | No  |
| ENSMUSG00000080793 | -2,70E+00 | -3,033614577 | 2,89E+00  | 8,93E-02 | 3,79E-01 | Cbx3-ps3      | 0,15 | No  |
| ENSMUSG00000080797 | 1,21E+00  | -0,641382841 | 9,47E+00  | 2,09E-03 | 2,90E-02 | Gm15760       | 2,32 | Yes |
| ENSMUSG00000080801 | 1,05E+00  | -1,448754922 | 3,70E+00  | 5,44E-02 | 2,85E-01 | Gm13310       | 2,07 | No  |
| ENSMUSG00000080806 | -1,42E-01 | -1,033698501 | 9,67E-02  | 7,56E-01 | 9,34E-01 | Gm13005       | 0,91 | No  |
| ENSMUSG00000080808 | -2,68E+00 | -3,033645766 | 2,84E+00  | 9,17E-02 | 3,82E-01 | Gm12608       | 0,16 | No  |

|                    |           |              |           |          |          |           |       |     |
|--------------------|-----------|--------------|-----------|----------|----------|-----------|-------|-----|
| ENSMUSG00000080810 | -2,27E-01 | -1,800990146 | 1,26E-01  | 7,23E-01 | 9,17E-01 | Gm11737   | 0,85  | No  |
| ENSMUSG00000080814 | 1,65E+00  | -2,770616865 | 1,87E+00  | 1,71E-01 | 5,27E-01 | Gm12314   | 3,14  | No  |
| ENSMUSG00000080816 | -5,29E-01 | 0,809809474  | 5,18E+00  | 2,28E-02 | 1,65E-01 | Gm12447   | 0,69  | No  |
| ENSMUSG00000080823 | -1,80E-02 | -1,485288359 | 1,00E-03  | 9,75E-01 | 1,00E+00 | Atp5l-ps2 | 0,99  | No  |
| ENSMUSG00000080824 | -3,33E-02 | 2,455126869  | 6,28E-02  | 8,02E-01 | 9,61E-01 | Gm9001    | 0,98  | No  |
| ENSMUSG00000080827 | 3,49E+00  | -2,655168743 | 5,29E+00  | 2,15E-02 | 1,58E-01 | Gm12086   | 11,23 | No  |
| ENSMUSG00000080831 | -1,04E-01 | -0,322090934 | 9,21E-02  | 7,62E-01 | 9,38E-01 | Gm12529   | 0,93  | No  |
| ENSMUSG00000080832 | -6,83E-02 | 6,595882495  | 1,20E+00  | 2,73E-01 | 5,69E-01 | M6pr-ps   | 0,95  | No  |
| ENSMUSG00000080833 | 3,14E-02  | -3,107617333 | -7,69E-10 | 1,00E+00 | 1,00E+00 | Gm11976   | 1,02  | No  |
| ENSMUSG00000080836 | -1,54E-02 | 4,837005755  | 4,12E-02  | 8,39E-01 | 9,83E-01 | Gm6444    | 0,99  | No  |
| ENSMUSG00000080839 | -1,89E+00 | -3,1076441   | 1,42E+00  | 2,33E-01 | 5,50E-01 | Gm11625   | 0,27  | No  |
| ENSMUSG00000080840 | -3,00E-01 | 0,779279475  | 1,78E+00  | 1,82E-01 | 5,45E-01 | Gm11349   | 0,81  | No  |
| ENSMUSG00000080844 | -2,85E-01 | 0,345096631  | 1,19E+00  | 2,76E-01 | 5,72E-01 | Gm14107   | 0,82  | No  |
| ENSMUSG00000080846 | -1,89E+00 | -3,1076441   | 1,42E+00  | 2,33E-01 | 5,50E-01 | Gm13379   | 0,27  | No  |
| ENSMUSG00000080848 | -3,01E-01 | 7,1569591    | 2,50E+01  | 5,64E-07 | 2,66E-05 | Gm9385    | 0,81  | Yes |
| ENSMUSG00000080849 | -5,30E-01 | -2,185597691 | 4,51E-01  | 5,02E-01 | 7,87E-01 | Gm15702   | 0,69  | No  |
| ENSMUSG00000080850 | 6,96E-01  | -2,89613858  | 2,63E-01  | 6,08E-01 | 8,51E-01 | Gm12439   | 1,62  | No  |
| ENSMUSG00000080851 | 8,29E-01  | -2,497548213 | 5,99E-01  | 4,39E-01 | 7,32E-01 | Gm12094   | 1,78  | No  |
| ENSMUSG00000080859 | -2,32E-01 | 8,027219408  | 1,59E+01  | 6,74E-05 | 1,75E-03 | Rpl10-ps1 | 0,85  | Yes |
| ENSMUSG00000080866 | -3,58E-01 | -2,497568074 | 1,61E-01  | 6,88E-01 | 8,98E-01 | Gm5687    | 0,78  | No  |
| ENSMUSG00000080868 | -2,70E+00 | -3,033614577 | 2,89E+00  | 8,93E-02 | 3,79E-01 | Gm15745   | 0,15  | No  |
| ENSMUSG00000080869 | 2,64E-02  | 0,087033889  | 7,62E-03  | 9,30E-01 | 1,00E+00 | Gm11856   | 1,02  | No  |
| ENSMUSG00000080870 | -4,38E-01 | -1,146123923 | 7,91E-01  | 3,74E-01 | 6,75E-01 | Gm14111   | 0,74  | No  |
| ENSMUSG00000080873 | -9,64E-02 | 1,493501498  | 2,92E-01  | 5,89E-01 | 8,41E-01 | Rpl30-ps3 | 0,94  | No  |
| ENSMUSG00000080875 | 5,61E-02  | 5,57949577   | 6,63E-01  | 4,16E-01 | 7,11E-01 | Gm7332    | 1,04  | No  |
| ENSMUSG00000080880 | 1,74E-01  | -1,770609789 | 9,13E-02  | 7,63E-01 | 9,38E-01 | Gm14278   | 1,13  | No  |
| ENSMUSG00000080885 | -2,31E-01 | 7,654416527  | 1,54E+01  | 8,73E-05 | 2,17E-03 | Rpl10-ps6 | 0,85  | Yes |
| ENSMUSG00000080888 | 1,37E-01  | -0,627576333 | 1,40E-01  | 7,08E-01 | 9,09E-01 | Gm14387   | 1,10  | No  |
| ENSMUSG00000080892 | -8,09E-02 | 1,006301136  | 1,60E-01  | 6,89E-01 | 8,99E-01 | Gm9266    | 0,95  | No  |
| ENSMUSG00000080893 | -1,18E-01 | 4,47344518   | 2,12E+00  | 1,46E-01 | 4,83E-01 | Gm15920   | 0,92  | No  |
| ENSMUSG00000080902 | 2,06E-02  | 4,65294896   | 6,96E-02  | 7,92E-01 | 9,55E-01 | Ywhaq-ps3 | 1,01  | No  |
| ENSMUSG00000080904 | -2,15E-01 | 3,899816074  | 5,58E+00  | 1,81E-02 | 1,42E-01 | Gm11966   | 0,86  | No  |

|                    |           |              |           |          |          |             |      |     |
|--------------------|-----------|--------------|-----------|----------|----------|-------------|------|-----|
| ENSMUSG00000080906 | -4,69E-02 | -2,832012543 | 1,46E-03  | 9,70E-01 | 1,00E+00 | Gm12095     | 0,97 | No  |
| ENSMUSG00000080911 | -2,78E-01 | 1,180207515  | 1,88E+00  | 1,71E-01 | 5,27E-01 | Gm11918     | 0,82 | No  |
| ENSMUSG00000080912 | -1,89E+00 | -3,1076441   | 1,42E+00  | 2,33E-01 | 5,50E-01 | Gm12269     | 0,27 | No  |
| ENSMUSG00000080916 | -1,26E+00 | -2,655108316 | 1,53E+00  | 2,17E-01 | 5,50E-01 | Gm12463     | 0,42 | No  |
| ENSMUSG00000080917 | 5,02E-03  | 4,113969741  | 3,36E-03  | 9,54E-01 | 1,00E+00 | Gm15925     | 1,00 | No  |
| ENSMUSG00000080921 | -1,70E-01 | 7,263545637  | 8,09E+00  | 4,45E-03 | 5,11E-02 | Rpl38-ps2   | 0,89 | No  |
| ENSMUSG00000080928 | -9,48E-02 | 1,100100467  | 2,19E-01  | 6,40E-01 | 8,70E-01 | Hmgb1-ps6   | 0,94 | No  |
| ENSMUSG00000080929 | 2,98E-01  | 0,3588888    | 1,27E+00  | 2,60E-01 | 5,53E-01 | Gm12891     | 1,23 | No  |
| ENSMUSG00000080932 | -4,53E-01 | 1,077272279  | 5,03E+00  | 2,49E-02 | 1,74E-01 | Gm10224     | 0,73 | No  |
| ENSMUSG00000080935 | -1,19E-01 | 5,516695078  | 2,99E+00  | 8,40E-02 | 3,71E-01 | Got2-ps1    | 0,92 | No  |
| ENSMUSG00000080936 | 7,20E-01  | -2,963285673 | 2,81E-01  | 5,96E-01 | 8,44E-01 | Olfr337-ps1 | 1,65 | No  |
| ENSMUSG00000080937 | 2,57E+00  | -2,963293044 | 2,56E+00  | 1,10E-01 | 4,06E-01 | Gm13510     | 5,93 | No  |
| ENSMUSG00000080946 | -3,83E-02 | -3,107651936 | -7,91E-11 | 1,00E+00 | 1,00E+00 | Gm12985     | 0,97 | No  |
| ENSMUSG00000080950 | -7,16E-02 | 1,644668787  | 1,80E-01  | 6,72E-01 | 8,89E-01 | Gm7278      | 0,95 | No  |
| ENSMUSG00000080951 | 3,44E-01  | -1,070264375 | 5,06E-01  | 4,77E-01 | 7,65E-01 | Gm12208     | 1,27 | No  |
| ENSMUSG00000080956 | -7,72E-02 | -2,311164352 | 6,80E-03  | 9,34E-01 | 1,00E+00 | Gm16179     | 0,95 | No  |
| ENSMUSG00000080957 | -1,46E+00 | -2,107585051 | 3,82E+00  | 5,07E-02 | 2,73E-01 | Gm15739     | 0,36 | No  |
| ENSMUSG00000080958 | -5,12E-01 | -1,997981944 | 4,21E-01  | 5,16E-01 | 7,97E-01 | Gm11902     | 0,70 | No  |
| ENSMUSG00000080962 | -1,38E+00 | -2,896135155 | 1,20E+00  | 2,74E-01 | 5,71E-01 | Gm11453     | 0,38 | No  |
| ENSMUSG00000080966 | -5,94E-02 | 6,109465562  | 8,42E-01  | 3,59E-01 | 6,60E-01 | Gm6263      | 0,96 | No  |
| ENSMUSG00000080969 | -1,59E-01 | 1,986581581  | 1,14E+00  | 2,86E-01 | 5,82E-01 | Gm12372     | 0,90 | No  |
| ENSMUSG00000080971 | 6,84E-01  | -2,146160364 | 6,77E-01  | 4,11E-01 | 7,07E-01 | Gm16128     | 1,61 | No  |
| ENSMUSG00000080972 | -3,10E+00 | -2,26796036  | 1,02E+01  | 1,44E-03 | 2,16E-02 | Gm16061     | 0,12 | Yes |
| ENSMUSG00000080977 | -1,63E-01 | 2,874550286  | 1,92E+00  | 1,66E-01 | 5,19E-01 | Gm13772     | 0,89 | No  |
| ENSMUSG00000080979 | 1,24E-01  | 2,875436528  | 1,11E+00  | 2,91E-01 | 5,87E-01 | Gm13675     | 1,09 | No  |
| ENSMUSG00000080981 | -3,05E-02 | 1,918485097  | 4,08E-02  | 8,40E-01 | 9,83E-01 | Gm12161     | 0,98 | No  |
| ENSMUSG00000080982 | -2,69E+00 | -2,896097497 | 2,87E+00  | 9,05E-02 | 3,81E-01 | Gm13549     | 0,16 | No  |
| ENSMUSG00000080989 | -5,34E-02 | 4,747029948  | 4,81E-01  | 4,88E-01 | 7,75E-01 | Gm14048     | 0,96 | No  |
| ENSMUSG00000080992 | -3,27E-01 | -2,088767788 | 2,29E-01  | 6,32E-01 | 8,64E-01 | Psmb5-ps    | 0,80 | No  |
| ENSMUSG00000080993 | -1,68E-01 | -2,146117311 | 5,07E-02  | 8,22E-01 | 9,72E-01 | Gm12903     | 0,89 | No  |
| ENSMUSG00000080994 | 7,33E-02  | 5,561422805  | 1,13E+00  | 2,88E-01 | 5,83E-01 | Gm13464     | 1,05 | No  |
| ENSMUSG00000080999 | -8,28E-02 | -2,522726454 | 7,04E-03  | 9,33E-01 | 1,00E+00 | Gm11336     | 0,94 | No  |

|                    |           |              |           |          |          |            |      |     |
|--------------------|-----------|--------------|-----------|----------|----------|------------|------|-----|
| ENSMUSG00000081000 | 3,14E-02  | -3,107617333 | -7,69E-10 | 1,00E+00 | 1,00E+00 | Gm11200    | 1,02 | No  |
| ENSMUSG00000081002 | -1,60E-01 | 2,522613212  | 1,56E+00  | 2,11E-01 | 5,50E-01 | Gm14240    | 0,90 | No  |
| ENSMUSG00000081005 | -1,15E+00 | -1,895974225 | 2,60E+00  | 1,07E-01 | 4,00E-01 | Gm13198    | 0,45 | No  |
| ENSMUSG00000081010 | 5,47E-02  | 3,687009671  | 3,29E-01  | 5,66E-01 | 8,28E-01 | Gm13880    | 1,04 | No  |
| ENSMUSG00000081013 | -1,03E+00 | -1,378222344 | 3,07E+00  | 7,98E-02 | 3,61E-01 | Gm14497    | 0,49 | No  |
| ENSMUSG00000081021 | -1,52E-01 | 5,850358436  | 5,24E+00  | 2,21E-02 | 1,61E-01 | Gm11964    | 0,90 | No  |
| ENSMUSG00000081023 | -8,07E-01 | -2,831972544 | 3,57E-01  | 5,50E-01 | 8,17E-01 | Gm15766    | 0,57 | No  |
| ENSMUSG00000081025 | -1,32E+00 | -2,896135995 | 1,09E+00  | 2,97E-01 | 5,93E-01 | Gm11943    | 0,40 | No  |
| ENSMUSG00000081026 | 1,85E+00  | -2,963264462 | 1,34E+00  | 2,48E-01 | 5,50E-01 | Gm11855    | 3,59 | No  |
| ENSMUSG00000081030 | -8,31E-01 | -2,770558106 | 3,79E-01  | 5,38E-01 | 8,09E-01 | Gm12704    | 0,56 | No  |
| ENSMUSG00000081037 | -1,44E+00 | -1,378155708 | 7,64E+00  | 5,72E-03 | 6,18E-02 | Gm13929    | 0,37 | No  |
| ENSMUSG00000081041 | -2,53E-01 | 0,650158863  | 1,17E+00  | 2,80E-01 | 5,77E-01 | Nlk-ps1    | 0,84 | No  |
| ENSMUSG00000081048 | 1,12E-01  | -1,998031749 | 2,48E-02  | 8,75E-01 | 1,00E+00 | Gm11760    | 1,08 | No  |
| ENSMUSG00000081051 | -1,73E-01 | 8,912016879  | 9,26E+00  | 2,34E-03 | 3,18E-02 | Gm15427    | 0,89 | Yes |
| ENSMUSG00000081052 | 7,03E-02  | 3,478442584  | 4,89E-01  | 4,85E-01 | 7,72E-01 | Gm6305     | 1,05 | No  |
| ENSMUSG00000081056 | -7,08E-01 | -2,03356355  | 8,52E-01  | 3,56E-01 | 6,57E-01 | Gm13998    | 0,61 | No  |
| ENSMUSG00000081058 | -1,02E-01 | 0,572117295  | 1,86E-01  | 6,66E-01 | 8,85E-01 | Hist2h3c2  | 0,93 | No  |
| ENSMUSG00000081059 | -1,80E-01 | 2,739725198  | 2,19E+00  | 1,39E-01 | 4,70E-01 | Gm11945    | 0,88 | No  |
| ENSMUSG00000081067 | 3,17E-01  | -2,49763878  | 1,02E-01  | 7,49E-01 | 9,31E-01 | Gm12912    | 1,25 | No  |
| ENSMUSG00000081068 | 1,75E-01  | 3,047404422  | 2,47E+00  | 1,16E-01 | 4,21E-01 | Gm12804    | 1,13 | No  |
| ENSMUSG00000081069 | -6,80E-01 | -1,863557687 | 1,05E+00  | 3,05E-01 | 6,01E-01 | Gm13928    | 0,62 | No  |
| ENSMUSG00000081070 | 2,56E-02  | 4,72632967   | 1,10E-01  | 7,40E-01 | 9,26E-01 | Gm13181    | 1,02 | No  |
| ENSMUSG00000081071 | -8,37E-02 | 1,783734637  | 2,80E-01  | 5,97E-01 | 8,45E-01 | Gm9836     | 0,94 | No  |
| ENSMUSG00000081076 | -1,22E-01 | 4,667549182  | 2,47E+00  | 1,16E-01 | 4,21E-01 | Rpsa-ps4   | 0,92 | No  |
| ENSMUSG00000081077 | -5,89E-01 | -2,600623495 | 2,72E-01  | 6,02E-01 | 8,48E-01 | Gm13899    | 0,66 | No  |
| ENSMUSG00000081078 | -7,81E-02 | -1,146017805 | 2,71E-02  | 8,69E-01 | 1,00E+00 | Gm12568    | 0,95 | No  |
| ENSMUSG00000081086 | -5,90E-02 | -2,146100716 | 5,64E-03  | 9,40E-01 | 1,00E+00 | Gm9506     | 0,96 | No  |
| ENSMUSG00000081087 | -2,06E-01 | 7,129432806  | 1,16E+01  | 6,49E-04 | 1,13E-02 | Rps15a-ps7 | 0,87 | Yes |
| ENSMUSG00000081093 | 1,71E-02  | 5,63775685   | 6,36E-02  | 8,01E-01 | 9,61E-01 | Gm12565    | 1,01 | No  |
| ENSMUSG00000081094 | -1,60E-01 | 9,13424246   | 7,94E+00  | 4,82E-03 | 5,45E-02 | Rpl19-ps11 | 0,90 | No  |
| ENSMUSG00000081098 | -2,51E+00 | -2,600606073 | 3,83E+00  | 5,05E-02 | 2,72E-01 | Gm12220    | 0,18 | No  |
| ENSMUSG00000081099 | -1,89E+00 | -3,1076441   | 1,42E+00  | 2,33E-01 | 5,50E-01 | Gm5270     | 0,27 | No  |

|                    |           |              |           |          |          |            |      |    |
|--------------------|-----------|--------------|-----------|----------|----------|------------|------|----|
| ENSMUSG00000081103 | -3,93E-01 | -1,355561643 | 5,20E-01  | 4,71E-01 | 7,59E-01 | Rps12-ps26 | 0,76 | No |
| ENSMUSG00000081104 | 6,93E-02  | 2,161248719  | 2,40E-01  | 6,24E-01 | 8,59E-01 | Gm15989    | 1,05 | No |
| ENSMUSG00000081110 | 1,82E+00  | -2,832040072 | 1,32E+00  | 2,51E-01 | 5,50E-01 | Gm12745    | 3,53 | No |
| ENSMUSG00000081111 | -2,41E-02 | 6,605151113  | 1,51E-01  | 6,98E-01 | 9,04E-01 | Gm5913     | 0,98 | No |
| ENSMUSG00000081113 | -1,19E-01 | 5,50853686   | 2,95E+00  | 8,59E-02 | 3,77E-01 | Gm7308     | 0,92 | No |
| ENSMUSG00000081120 | -3,83E-02 | -3,107651936 | -7,91E-11 | 1,00E+00 | 1,00E+00 | Gm12458    | 0,97 | No |
| ENSMUSG00000081121 | -8,58E-02 | 5,980455371  | 1,71E+00  | 1,91E-01 | 5,50E-01 | Gm12791    | 0,94 | No |
| ENSMUSG00000081123 | 3,78E-01  | -2,226338925 | 2,28E-01  | 6,33E-01 | 8,65E-01 | Gm11469    | 1,30 | No |
| ENSMUSG00000081126 | 7,56E-02  | 4,092027761  | 7,40E-01  | 3,90E-01 | 6,90E-01 | Gm15784    | 1,05 | No |
| ENSMUSG00000081127 | -1,94E+00 | -3,107619243 | 1,50E+00  | 2,21E-01 | 5,50E-01 | Gm12677    | 0,26 | No |
| ENSMUSG00000081128 | -3,24E-02 | 3,620039347  | 1,13E-01  | 7,37E-01 | 9,25E-01 | Gm13328    | 0,98 | No |
| ENSMUSG00000081130 | 9,01E-03  | -3,107646452 | -5,16E-10 | 1,00E+00 | 1,00E+00 | Gm8217     | 1,01 | No |
| ENSMUSG00000081132 | 2,33E-01  | -0,816417523 | 3,09E-01  | 5,78E-01 | 8,35E-01 | Gm13744    | 1,18 | No |
| ENSMUSG00000081136 | -7,94E-01 | -2,896102912 | 3,44E-01  | 5,57E-01 | 8,21E-01 | Gm12990    | 0,58 | No |
| ENSMUSG00000081138 | -9,15E-02 | 3,889291263  | 1,02E+00  | 3,13E-01 | 6,13E-01 | Gm12834    | 0,94 | No |
| ENSMUSG00000081139 | -8,37E-01 | -2,401297198 | 1,02E+00  | 3,12E-01 | 6,12E-01 | Gm13333    | 0,56 | No |
| ENSMUSG00000081142 | 5,68E-01  | -1,289571959 | 1,40E+00  | 2,38E-01 | 5,50E-01 | Gm15497    | 1,48 | No |
| ENSMUSG00000081143 | -3,83E-02 | -3,107651936 | -7,91E-11 | 1,00E+00 | 1,00E+00 | Gm15823    | 0,97 | No |
| ENSMUSG00000081151 | 2,26E-02  | 2,702205863  | 3,40E-02  | 8,54E-01 | 9,92E-01 | Gm11448    | 1,02 | No |
| ENSMUSG00000081152 | 1,70E-01  | 3,287444214  | 2,67E+00  | 1,02E-01 | 3,94E-01 | Gm12430    | 1,13 | No |
| ENSMUSG00000081153 | 2,74E-02  | -3,033621357 | 9,16E-12  | 1,00E+00 | 1,00E+00 | Gm11401    | 1,02 | No |
| ENSMUSG00000081156 | -7,42E-02 | -1,683112101 | 1,41E-02  | 9,05E-01 | 1,00E+00 | Gm14425    | 0,95 | No |
| ENSMUSG00000081157 | 2,24E-01  | 3,495780799  | 5,11E+00  | 2,38E-02 | 1,69E-01 | Gm13552    | 1,17 | No |
| ENSMUSG00000081161 | -1,59E-02 | -2,96323932  | 1,18E-04  | 9,91E-01 | 1,00E+00 | Gm12783    | 0,99 | No |
| ENSMUSG00000081165 | -2,73E-01 | -2,033624345 | 1,30E-01  | 7,19E-01 | 9,15E-01 | Gm11783    | 0,83 | No |
| ENSMUSG00000081169 | -9,70E-01 | -1,366768157 | 3,11E+00  | 7,80E-02 | 3,57E-01 | Gm12551    | 0,51 | No |
| ENSMUSG00000081170 | 2,03E-02  | 4,326854983  | 5,93E-02  | 8,08E-01 | 9,64E-01 | Gm12922    | 1,01 | No |
| ENSMUSG00000081176 | 3,80E-03  | 6,537453566  | 3,69E-03  | 9,52E-01 | 1,00E+00 | H3f3a-ps2  | 1,00 | No |
| ENSMUSG00000081179 | 1,02E-01  | 4,249875908  | 1,46E+00  | 2,27E-01 | 5,50E-01 | Gm13136    | 1,07 | No |
| ENSMUSG00000081185 | -1,78E-01 | 2,238616053  | 1,59E+00  | 2,07E-01 | 5,50E-01 | Gm4852     | 0,88 | No |
| ENSMUSG00000081191 | -3,83E-02 | -3,107651936 | -7,91E-11 | 1,00E+00 | 1,00E+00 | Gm11271    | 0,97 | No |
| ENSMUSG00000081201 | -1,82E-01 | 4,061674986  | 4,27E+00  | 3,89E-02 | 2,34E-01 | Smt3h2-ps4 | 0,88 | No |

|                    |           |              |           |          |          |            |      |     |
|--------------------|-----------|--------------|-----------|----------|----------|------------|------|-----|
| ENSMUSG00000081206 | -4,16E-01 | -2,655082866 | 1,76E-01  | 6,75E-01 | 8,90E-01 | Gm11935    | 0,75 | No  |
| ENSMUSG00000081208 | 5,78E-03  | 5,588442698  | 7,17E-03  | 9,33E-01 | 1,00E+00 | Gm11400    | 1,00 | No  |
| ENSMUSG00000081210 | -6,13E-01 | 0,471421352  | 6,17E+00  | 1,30E-02 | 1,13E-01 | Gm12933    | 0,65 | No  |
| ENSMUSG00000081214 | -1,73E-01 | 5,650610397  | 6,48E+00  | 1,09E-02 | 9,96E-02 | Rpl35a-ps2 | 0,89 | No  |
| ENSMUSG00000081219 | -1,42E-02 | -0,66882976  | 1,20E-03  | 9,72E-01 | 1,00E+00 | Bambi-ps1  | 0,99 | No  |
| ENSMUSG00000081223 | 4,86E-02  | 0,575185842  | 3,97E-02  | 8,42E-01 | 9,85E-01 | Gm12247    | 1,03 | No  |
| ENSMUSG00000081226 | 2,38E-02  | 2,451638571  | 3,39E-02  | 8,54E-01 | 9,92E-01 | Gm8802     | 1,02 | No  |
| ENSMUSG00000081227 | -5,66E-02 | 4,067572602  | 4,14E-01  | 5,20E-01 | 7,99E-01 | Gm13082    | 0,96 | No  |
| ENSMUSG00000081228 | -1,36E-01 | 4,761177197  | 3,14E+00  | 7,63E-02 | 3,52E-01 | Gm16089    | 0,91 | No  |
| ENSMUSG00000081236 | -1,17E+00 | -2,268045772 | 1,77E+00  | 1,83E-01 | 5,46E-01 | Gm13574    | 0,44 | No  |
| ENSMUSG00000081237 | 9,01E-03  | -3,107646452 | -5,16E-10 | 1,00E+00 | 1,00E+00 | Gm11385    | 1,01 | No  |
| ENSMUSG00000081238 | -1,90E+00 | -3,033647263 | 1,44E+00  | 2,30E-01 | 5,50E-01 | Gm15836    | 0,27 | No  |
| ENSMUSG00000081239 | -3,72E-01 | 4,939577618  | 2,48E+01  | 6,38E-07 | 2,96E-05 | Gm11836    | 0,77 | Yes |
| ENSMUSG00000081242 | -3,32E-01 | 0,002055994  | 1,28E+00  | 2,59E-01 | 5,51E-01 | Gm15719    | 0,79 | No  |
| ENSMUSG00000081244 | 2,34E-01  | -2,205844357 | 9,76E-02  | 7,55E-01 | 9,34E-01 | Gm13529    | 1,18 | No  |
| ENSMUSG00000081248 | 3,07E-01  | 0,019330989  | 1,02E+00  | 3,14E-01 | 6,14E-01 | Gm13787    | 1,24 | No  |
| ENSMUSG00000081249 | 8,54E-02  | -1,226397871 | 2,89E-02  | 8,65E-01 | 9,98E-01 | Gm11517    | 1,06 | No  |
| ENSMUSG00000081251 | 4,05E-02  | 1,389267468  | 4,99E-02  | 8,23E-01 | 9,73E-01 | Gm12164    | 1,03 | No  |
| ENSMUSG00000081252 | -1,94E+00 | -3,107619243 | 1,50E+00  | 2,21E-01 | 5,50E-01 | Gm16032    | 0,26 | No  |
| ENSMUSG00000081254 | -9,80E-02 | 3,696689469  | 1,05E+00  | 3,05E-01 | 6,02E-01 | Gm12112    | 0,93 | No  |
| ENSMUSG00000081256 | 1,24E+00  | -2,740822304 | 9,50E-01  | 3,30E-01 | 6,30E-01 | Gm15791    | 2,36 | No  |
| ENSMUSG00000081257 | 1,64E-01  | 2,471521428  | 1,47E+00  | 2,26E-01 | 5,50E-01 | Gm13607    | 1,12 | No  |
| ENSMUSG00000081258 | -4,25E-02 | 3,233783823  | 1,59E-01  | 6,90E-01 | 8,99E-01 | Gm14013    | 0,97 | No  |
| ENSMUSG00000081259 | -3,44E-01 | 0,136442817  | 1,44E+00  | 2,30E-01 | 5,50E-01 | Gm6893     | 0,79 | No  |
| ENSMUSG00000081261 | -3,95E-02 | -2,963274761 | 7,08E-04  | 9,79E-01 | 1,00E+00 | Gm15370    | 0,97 | No  |
| ENSMUSG00000081262 | -3,27E-02 | 1,630622608  | 3,79E-02  | 8,46E-01 | 9,87E-01 | Gm12261    | 0,98 | No  |
| ENSMUSG00000081264 | -3,88E-03 | -3,03362684  | 4,02E-12  | 1,00E+00 | 1,00E+00 | Gm14021    | 1,00 | No  |
| ENSMUSG00000081265 | -1,94E+00 | -3,107619243 | 1,50E+00  | 2,21E-01 | 5,50E-01 | Gm11282    | 0,26 | No  |
| ENSMUSG00000081272 | 5,46E-02  | 8,678691227  | 9,10E-01  | 3,40E-01 | 6,41E-01 | Gm13509    | 1,04 | No  |
| ENSMUSG00000081274 | 1,29E-01  | -1,711788454 | 5,84E-02  | 8,09E-01 | 9,65E-01 | Gm15727    | 1,09 | No  |
| ENSMUSG00000081277 | -1,37E-02 | 4,854328599  | 3,25E-02  | 8,57E-01 | 9,94E-01 | Gm15285    | 0,99 | No  |
| ENSMUSG00000081278 | 8,92E-02  | 2,425725584  | 4,35E-01  | 5,10E-01 | 7,93E-01 | Gm13186    | 1,06 | No  |



|                    |           |              |           |          |          |           |      |    |
|--------------------|-----------|--------------|-----------|----------|----------|-----------|------|----|
| ENSMUSG00000081282 | -1,99E+00 | -2,655106177 | 2,99E+00  | 8,39E-02 | 3,71E-01 | Gm13836   | 0,25 | No |
| ENSMUSG00000081284 | -7,26E-02 | -2,770594557 | 2,22E-03  | 9,62E-01 | 1,00E+00 | Gm13673   | 0,95 | No |
| ENSMUSG00000081285 | -6,56E-02 | -2,896173716 | 2,94E-03  | 9,57E-01 | 1,00E+00 | Gm18859   | 0,96 | No |
| ENSMUSG00000081301 | 7,16E-01  | -2,896139042 | 2,79E-01  | 5,97E-01 | 8,45E-01 | Gm15951   | 1,64 | No |
| ENSMUSG00000081302 | -4,33E-02 | 4,258444753  | 2,65E-01  | 6,06E-01 | 8,50E-01 | Gm12020   | 0,97 | No |
| ENSMUSG00000081303 | -5,79E-01 | -1,711612007 | 1,12E+00  | 2,90E-01 | 5,86E-01 | Gm16011   | 0,67 | No |
| ENSMUSG00000081304 | -1,94E+00 | -3,107619243 | 1,50E+00  | 2,21E-01 | 5,50E-01 | Gm11509   | 0,26 | No |
| ENSMUSG00000081309 | 1,22E-01  | 3,63360975   | 1,62E+00  | 2,03E-01 | 5,50E-01 | Gm12397   | 1,09 | No |
| ENSMUSG00000081314 | 2,30E-02  | 1,066587083  | 1,34E-02  | 9,08E-01 | 1,00E+00 | Gm14132   | 1,02 | No |
| ENSMUSG00000081316 | -6,56E-02 | 1,741923369  | 1,70E-01  | 6,80E-01 | 8,93E-01 | Gm16205   | 0,96 | No |
| ENSMUSG00000081317 | 1,57E+00  | -2,448759673 | 2,70E+00  | 1,00E-01 | 3,92E-01 | Gm12757   | 2,98 | No |
| ENSMUSG00000081319 | 1,23E+00  | -2,448710017 | 9,38E-01  | 3,33E-01 | 6,33E-01 | Gm12936   | 2,35 | No |
| ENSMUSG00000081321 | 1,34E+00  | -2,49763913  | 1,83E+00  | 1,76E-01 | 5,35E-01 | Gm15304   | 2,53 | No |
| ENSMUSG00000081325 | -1,37E-01 | 2,110125649  | 9,09E-01  | 3,40E-01 | 6,41E-01 | Gm12599   | 0,91 | No |
| ENSMUSG00000081329 | 1,11E+00  | -1,574365018 | 3,58E+00  | 5,86E-02 | 2,99E-01 | Gm12492   | 2,16 | No |
| ENSMUSG00000081330 | 9,01E-03  | -3,107646452 | -5,16E-10 | 1,00E+00 | 1,00E+00 | Gm13013   | 1,01 | No |
| ENSMUSG00000081332 | -4,47E-02 | -2,770600874 | 9,54E-04  | 9,75E-01 | 1,00E+00 | Gm12664   | 0,97 | No |
| ENSMUSG00000081335 | 7,17E-01  | -1,600812097 | 1,56E+00  | 2,12E-01 | 5,50E-01 | Gm15786   | 1,64 | No |
| ENSMUSG00000081339 | 3,95E-01  | -1,627731966 | 4,67E-01  | 4,94E-01 | 7,80E-01 | Gm16044   | 1,31 | No |
| ENSMUSG00000081340 | -1,20E+00 | -2,185599013 | 1,87E+00  | 1,72E-01 | 5,28E-01 | Gm12275   | 0,43 | No |
| ENSMUSG00000081342 | 2,95E-01  | 1,526893763  | 2,78E+00  | 9,57E-02 | 3,86E-01 | Gm11434   | 1,23 | No |
| ENSMUSG00000081343 | -2,46E-01 | -2,107737186 | 1,19E-01  | 7,30E-01 | 9,21E-01 | Gm16071   | 0,84 | No |
| ENSMUSG00000081344 | -1,37E-01 | 9,016910878  | 5,82E+00  | 1,58E-02 | 1,31E-01 | Gm14303   | 0,91 | No |
| ENSMUSG00000081352 | 2,81E-02  | 4,173917898  | 1,07E-01  | 7,44E-01 | 9,29E-01 | Gm12389   | 1,02 | No |
| ENSMUSG00000081353 | -3,83E-02 | -3,107651936 | -7,91E-11 | 1,00E+00 | 1,00E+00 | Gm13818   | 0,97 | No |
| ENSMUSG00000081355 | -8,39E-01 | -2,863700663 | 3,86E-01  | 5,34E-01 | 8,07E-01 | Gm15264   | 0,56 | No |
| ENSMUSG00000081359 | -2,12E-01 | 1,136775614  | 1,14E+00  | 2,85E-01 | 5,81E-01 | Cox20-ps  | 0,86 | No |
| ENSMUSG00000081369 | 6,76E-01  | -0,641258691 | 3,14E+00  | 7,63E-02 | 3,52E-01 | Gm11896   | 1,60 | No |
| ENSMUSG00000081370 | -4,60E-02 | 4,86526899   | 3,74E-01  | 5,41E-01 | 8,11E-01 | Gm9105    | 0,97 | No |
| ENSMUSG00000081372 | -3,86E-01 | -0,655037626 | 9,83E-01  | 3,21E-01 | 6,22E-01 | Gm16171   | 0,77 | No |
| ENSMUSG00000081376 | 1,25E+00  | -2,770607553 | 9,70E-01  | 3,25E-01 | 6,25E-01 | Gm11694   | 2,38 | No |
| ENSMUSG00000081378 | -1,29E-01 | 5,053129691  | 3,13E+00  | 7,71E-02 | 3,54E-01 | Rps13-ps4 | 0,91 | No |

|                    |           |              |           |          |          |              |      |     |
|--------------------|-----------|--------------|-----------|----------|----------|--------------|------|-----|
| ENSMUSG00000081382 | -1,88E-01 | 4,585003087  | 5,68E+00  | 1,71E-02 | 1,37E-01 | Rpl18-ps1    | 0,88 | No  |
| ENSMUSG00000081389 | -6,53E-02 | -1,522563476 | 1,40E-02  | 9,06E-01 | 1,00E+00 | Gm13368      | 0,96 | No  |
| ENSMUSG00000081394 | -5,33E-02 | -2,07015912  | 5,93E-03  | 9,39E-01 | 1,00E+00 | Gm13215      | 0,96 | No  |
| ENSMUSG00000081400 | -1,53E-01 | 7,949559192  | 6,94E+00  | 8,43E-03 | 8,24E-02 | Gm13680      | 0,90 | No  |
| ENSMUSG00000081402 | 6,86E-02  | 3,901980629  | 5,76E-01  | 4,48E-01 | 7,38E-01 | Gm15455      | 1,05 | No  |
| ENSMUSG00000081404 | -5,61E-01 | -0,205699395 | 2,84E+00  | 9,17E-02 | 3,82E-01 | Gm15694      | 0,68 | No  |
| ENSMUSG00000081405 | 1,92E-01  | 2,931627176  | 2,84E+00  | 9,18E-02 | 3,82E-01 | Gm13142      | 1,14 | No  |
| ENSMUSG00000081406 | -1,23E-01 | 9,236723826  | 4,68E+00  | 3,06E-02 | 2,01E-01 | Rps6-ps4     | 0,92 | No  |
| ENSMUSG00000081413 | -2,49E-01 | 4,535390103  | 9,61E+00  | 1,93E-03 | 2,72E-02 | Uqcrh-ps2    | 0,84 | Yes |
| ENSMUSG00000081416 | 3,60E-01  | -2,015772432 | 2,76E-01  | 6,00E-01 | 8,46E-01 | Gm14383      | 1,28 | No  |
| ENSMUSG00000081429 | -6,19E-02 | -2,146135851 | 6,20E-03  | 9,37E-01 | 1,00E+00 | Rps27-ps1    | 0,96 | No  |
| ENSMUSG00000081431 | -8,75E-02 | 2,650331252  | 5,02E-01  | 4,78E-01 | 7,66E-01 | Gm15483      | 0,94 | No  |
| ENSMUSG00000081433 | -1,87E+00 | -3,03364178  | 1,41E+00  | 2,36E-01 | 5,50E-01 | Serpinb1-ps1 | 0,27 | No  |
| ENSMUSG00000081434 | -9,78E-02 | 4,720857181  | 1,60E+00  | 2,05E-01 | 5,50E-01 | Gm14165      | 0,93 | No  |
| ENSMUSG00000081436 | 8,32E-02  | 3,328176068  | 6,50E-01  | 4,20E-01 | 7,15E-01 | Gm5912       | 1,06 | No  |
| ENSMUSG00000081437 | 3,14E-02  | -3,107617333 | -7,69E-10 | 1,00E+00 | 1,00E+00 | Gm12402      | 1,02 | No  |
| ENSMUSG00000081440 | 4,24E-02  | -3,033592245 | -1,17E-09 | 1,00E+00 | 1,00E+00 | Gm12464      | 1,03 | No  |
| ENSMUSG00000081441 | 4,36E-02  | 5,04407932   | 3,50E-01  | 5,54E-01 | 8,20E-01 | Gm6161       | 1,03 | No  |
| ENSMUSG00000081445 | -1,94E+00 | -3,107619243 | 1,50E+00  | 2,21E-01 | 5,50E-01 | Rpl23a-ps4   | 0,26 | No  |
| ENSMUSG00000081451 | -6,76E-02 | 4,243279905  | 6,36E-01  | 4,25E-01 | 7,19E-01 | Gm12734      | 0,95 | No  |
| ENSMUSG00000081453 | -1,84E-01 | 6,643013487  | 8,86E+00  | 2,92E-03 | 3,76E-02 | Gm6767       | 0,88 | Yes |
| ENSMUSG00000081455 | 6,11E-02  | 3,399973476  | 3,54E-01  | 5,52E-01 | 8,18E-01 | Hmgb1-ps3    | 1,04 | No  |
| ENSMUSG00000081457 | -3,83E-02 | -3,107651936 | -7,91E-11 | 1,00E+00 | 1,00E+00 | Gm13488      | 0,97 | No  |
| ENSMUSG00000081459 | -4,70E-02 | 1,087923092  | 5,42E-02  | 8,16E-01 | 9,69E-01 | Llph-ps1     | 0,97 | No  |
| ENSMUSG00000081460 | 2,51E-01  | -1,510056414 | 2,44E-01  | 6,21E-01 | 8,57E-01 | Gm13168      | 1,19 | No  |
| ENSMUSG00000081467 | -7,82E-02 | -2,268156672 | 5,47E-03  | 9,41E-01 | 1,00E+00 | Gm13337      | 0,95 | No  |
| ENSMUSG00000081470 | -2,82E-02 | 3,279483704  | 7,14E-02  | 7,89E-01 | 9,54E-01 | Gm14131      | 0,98 | No  |
| ENSMUSG00000081476 | 3,63E-02  | 4,250742385  | 1,85E-01  | 6,67E-01 | 8,86E-01 | ltpa-ps1     | 1,03 | No  |
| ENSMUSG00000081480 | -8,76E-01 | -2,070154848 | 1,38E+00  | 2,40E-01 | 5,50E-01 | Gm13608      | 0,54 | No  |
| ENSMUSG00000081483 | -2,02E-01 | 2,739937545  | 2,70E+00  | 1,00E-01 | 3,92E-01 | Gm12445      | 0,87 | No  |
| ENSMUSG00000081485 | -8,46E-03 | 6,429873147  | 1,80E-02  | 8,93E-01 | 1,00E+00 | Gm12338      | 0,99 | No  |
| ENSMUSG00000081487 | 1,03E-01  | 0,32396207   | 1,63E-01  | 6,86E-01 | 8,97E-01 | Gm13689      | 1,07 | No  |

|                    |           |              |           |          |          |           |       |     |
|--------------------|-----------|--------------|-----------|----------|----------|-----------|-------|-----|
| ENSMUSG00000081488 | -1,67E+00 | -2,107532392 | 4,25E+00  | 3,93E-02 | 2,35E-01 | Gm15368   | 0,31  | No  |
| ENSMUSG00000081490 | 1,85E+00  | -3,107657832 | 1,35E+00  | 2,46E-01 | 5,50E-01 | Gm11830   | 3,61  | No  |
| ENSMUSG00000081491 | -9,07E-01 | -0,718897536 | 5,36E+00  | 2,07E-02 | 1,54E-01 | Gm12778   | 0,53  | No  |
| ENSMUSG00000081492 | -1,84E-01 | 0,644579392  | 6,14E-01  | 4,33E-01 | 7,27E-01 | Gm9311    | 0,88  | No  |
| ENSMUSG00000081494 | -2,29E-01 | 0,006500604  | 6,29E-01  | 4,28E-01 | 7,22E-01 | Gm14130   | 0,85  | No  |
| ENSMUSG00000081496 | -2,49E-02 | -3,146121042 | -4,44E-11 | 1,00E+00 | 1,00E+00 | Gm13428   | 0,98  | No  |
| ENSMUSG00000081497 | 2,11E-01  | -1,801095121 | 1,14E-01  | 7,36E-01 | 9,24E-01 | Gm15560   | 1,16  | No  |
| ENSMUSG00000081499 | -3,83E-02 | -3,107651936 | -7,91E-11 | 1,00E+00 | 1,00E+00 | Gm12517   | 0,97  | No  |
| ENSMUSG00000081501 | -1,12E+00 | -2,929275006 | 5,52E-01  | 4,58E-01 | 7,47E-01 | Gm13286   | 0,46  | No  |
| ENSMUSG00000081504 | -1,86E+00 | -3,033612668 | 1,39E+00  | 2,38E-01 | 5,50E-01 | Gm12508   | 0,28  | No  |
| ENSMUSG00000081512 | -6,18E-02 | 4,943938098  | 6,81E-01  | 4,09E-01 | 7,06E-01 | Gm15821   | 0,96  | No  |
| ENSMUSG00000081515 | -1,36E+00 | -2,497587641 | 1,16E+00  | 2,82E-01 | 5,78E-01 | Gm12311   | 0,39  | No  |
| ENSMUSG00000081516 | -4,71E-01 | 0,814692094  | 4,51E+00  | 3,36E-02 | 2,16E-01 | Gm12470   | 0,72  | No  |
| ENSMUSG00000081519 | -1,99E-01 | 4,18494806   | 5,41E+00  | 2,01E-02 | 1,52E-01 | Gm13331   | 0,87  | No  |
| ENSMUSG00000081520 | -4,46E-01 | 0,921010286  | 4,78E+00  | 2,87E-02 | 1,93E-01 | Gm16200   | 0,73  | No  |
| ENSMUSG00000081522 | -6,07E-02 | -2,77055561  | 2,50E-03  | 9,60E-01 | 1,00E+00 | Gm13170   | 0,96  | No  |
| ENSMUSG00000081524 | 2,67E+00  | -3,033636951 | 2,76E+00  | 9,68E-02 | 3,88E-01 | Gm11658   | 6,36  | No  |
| ENSMUSG00000081528 | -8,51E-02 | -2,226248373 | 1,17E-02  | 9,14E-01 | 1,00E+00 | Gm12924   | 0,94  | No  |
| ENSMUSG00000081534 | 1,22E-01  | 8,184007847  | 4,46E+00  | 3,47E-02 | 2,20E-01 | Slc48a1   | 1,09  | No  |
| ENSMUSG00000081539 | 2,08E-01  | -2,548213368 | 5,41E-02  | 8,16E-01 | 9,69E-01 | Gm11990   | 1,16  | No  |
| ENSMUSG00000081540 | -1,81E-01 | 0,906751211  | 7,14E-01  | 3,98E-01 | 6,98E-01 | Gm12538   | 0,88  | No  |
| ENSMUSG00000081541 | 3,07E-01  | -2,401439381 | 9,60E-02  | 7,57E-01 | 9,35E-01 | Gm13940   | 1,24  | No  |
| ENSMUSG00000081544 | -6,29E-02 | 2,916871698  | 2,93E-01  | 5,88E-01 | 8,40E-01 | Gm13077   | 0,96  | No  |
| ENSMUSG00000081552 | -3,89E-02 | -2,831956393 | 7,45E-04  | 9,78E-01 | 1,00E+00 | Gm12328   | 0,97  | No  |
| ENSMUSG00000081553 | -2,23E-01 | 4,970045107  | 9,11E+00  | 2,54E-03 | 3,38E-02 | Ccdc50-ps | 0,86  | Yes |
| ENSMUSG00000081557 | -1,12E-01 | 1,095425416  | 3,30E-01  | 5,66E-01 | 8,28E-01 | Gm5697    | 0,93  | No  |
| ENSMUSG00000081559 | -1,35E-01 | 5,222447899  | 3,55E+00  | 5,97E-02 | 3,02E-01 | Gm12411   | 0,91  | No  |
| ENSMUSG00000081562 | 3,46E-02  | 1,866414062  | 4,73E-02  | 8,28E-01 | 9,76E-01 | Gm11575   | 1,02  | No  |
| ENSMUSG00000081564 | 3,99E+00  | -2,711810741 | 7,71E+00  | 5,49E-03 | 5,99E-02 | Gm13717   | 15,86 | No  |
| ENSMUSG00000081565 | 4,41E-01  | -2,448678538 | 1,52E-01  | 6,97E-01 | 9,03E-01 | Rps12-ps5 | 1,36  | No  |
| ENSMUSG00000081570 | 1,87E+00  | -3,03364371  | 1,36E+00  | 2,43E-01 | 5,50E-01 | Gm12192   | 3,66  | No  |
| ENSMUSG00000081572 | -1,11E-01 | -0,613980053 | 9,39E-02  | 7,59E-01 | 9,36E-01 | Gm14138   | 0,93  | No  |

|                    |           |              |          |          |          |            |      |     |
|--------------------|-----------|--------------|----------|----------|----------|------------|------|-----|
| ENSMUSG00000081574 | -1,23E+00 | -2,548150953 | 1,44E+00 | 2,29E-01 | 5,50E-01 | Gm14429    | 0,43 | No  |
| ENSMUSG00000081575 | -1,91E+00 | -2,896158411 | 1,45E+00 | 2,28E-01 | 5,50E-01 | Gm12090    | 0,27 | No  |
| ENSMUSG00000081578 | 1,58E-02  | 1,140693747  | 6,24E-03 | 9,37E-01 | 1,00E+00 | Gm12611    | 1,01 | No  |
| ENSMUSG00000081580 | 1,81E+00  | -3,10765737  | 1,28E+00 | 2,58E-01 | 5,50E-01 | Gm14129    | 3,49 | No  |
| ENSMUSG00000081584 | 1,81E+00  | -3,10765737  | 1,28E+00 | 2,58E-01 | 5,50E-01 | Gm12716    | 3,49 | No  |
| ENSMUSG00000081585 | -1,87E+00 | -3,107637761 | 1,39E+00 | 2,38E-01 | 5,50E-01 | Gm12926    | 0,27 | No  |
| ENSMUSG00000081593 | -5,00E-02 | 1,532153523  | 8,42E-02 | 7,72E-01 | 9,43E-01 | Gm11841    | 0,97 | No  |
| ENSMUSG00000081594 | -2,65E+00 | -2,963225595 | 2,80E+00 | 9,41E-02 | 3,84E-01 | Gm15467    | 0,16 | No  |
| ENSMUSG00000081600 | -1,01E-02 | 4,294093641  | 1,44E-02 | 9,04E-01 | 1,00E+00 | Gm12286    | 0,99 | No  |
| ENSMUSG00000081602 | -2,66E+00 | -2,831967508 | 2,82E+00 | 9,32E-02 | 3,83E-01 | Gm15369    | 0,16 | No  |
| ENSMUSG00000081604 | -2,28E-01 | 7,354735748  | 1,46E+01 | 1,32E-04 | 3,06E-03 | Gm11518    | 0,85 | Yes |
| ENSMUSG00000081605 | 4,49E-01  | -1,051873519 | 1,07E+00 | 3,02E-01 | 5,98E-01 | Gm15953    | 1,37 | No  |
| ENSMUSG00000081608 | 6,19E-01  | -2,226283105 | 4,28E-01 | 5,13E-01 | 7,95E-01 | Gm16210    | 1,54 | No  |
| ENSMUSG00000081610 | -8,03E-01 | -0,929110328 | 3,66E+00 | 5,58E-02 | 2,90E-01 | Gm13733    | 0,57 | No  |
| ENSMUSG00000081611 | -7,52E-02 | 4,067850632  | 7,40E-01 | 3,90E-01 | 6,90E-01 | Gm13651    | 0,95 | No  |
| ENSMUSG00000081613 | -1,87E+00 | -3,107637761 | 1,39E+00 | 2,38E-01 | 5,50E-01 | Gm12109    | 0,27 | No  |
| ENSMUSG00000081619 | -1,02E+00 | -1,401052029 | 3,34E+00 | 6,78E-02 | 3,28E-01 | Gm13351    | 0,49 | No  |
| ENSMUSG00000081627 | -4,67E-02 | -2,655093458 | 1,52E-03 | 9,69E-01 | 1,00E+00 | Gm13158    | 0,97 | No  |
| ENSMUSG00000081629 | -1,50E-01 | 4,179791003  | 3,08E+00 | 7,90E-02 | 3,60E-01 | Eif3s6-ps1 | 0,90 | No  |
| ENSMUSG00000081631 | -1,18E-01 | 2,376027648  | 7,79E-01 | 3,77E-01 | 6,78E-01 | Gm12005    | 0,92 | No  |
| ENSMUSG00000081636 | -1,90E+00 | -3,033647263 | 1,44E+00 | 2,30E-01 | 5,50E-01 | Gm15901    | 0,27 | No  |
| ENSMUSG00000081640 | -1,73E-01 | 4,655974154  | 4,91E+00 | 2,67E-02 | 1,83E-01 | Rplp0-ps1  | 0,89 | No  |
| ENSMUSG00000081642 | -1,05E-01 | 0,769005597  | 2,23E-01 | 6,37E-01 | 8,68E-01 | Gm13532    | 0,93 | No  |
| ENSMUSG00000081643 | 9,57E-02  | 6,961468479  | 2,47E+00 | 1,16E-01 | 4,22E-01 | Gm11605    | 1,07 | No  |
| ENSMUSG00000081647 | -7,45E-01 | -2,448674062 | 6,21E-01 | 4,31E-01 | 7,24E-01 | Gm13022    | 0,60 | No  |
| ENSMUSG00000081648 | -4,61E-02 | -2,497513346 | 1,51E-03 | 9,69E-01 | 1,00E+00 | Gm13423    | 0,97 | No  |
| ENSMUSG00000081650 | -8,98E-02 | 1,926424137  | 3,45E-01 | 5,57E-01 | 8,21E-01 | Gm16181    | 0,94 | No  |
| ENSMUSG00000081651 | 5,49E-02  | 2,56597393   | 1,85E-01 | 6,67E-01 | 8,86E-01 | Gm15530    | 1,04 | No  |
| ENSMUSG00000081656 | -9,96E-02 | 3,590410525  | 1,03E+00 | 3,10E-01 | 6,09E-01 | Gm11246    | 0,93 | No  |
| ENSMUSG00000081657 | -3,16E+00 | -2,832004344 | 4,21E+00 | 4,03E-02 | 2,38E-01 | Gm15466    | 0,11 | No  |
| ENSMUSG00000081660 | 1,52E-01  | 3,793634007  | 2,63E+00 | 1,05E-01 | 3,97E-01 | Gm11787    | 1,11 | No  |
| ENSMUSG00000081664 | 5,75E-02  | 1,771355505  | 1,27E-01 | 7,21E-01 | 9,16E-01 | Gm15544    | 1,04 | No  |

|                    |           |              |           |          |          |           |      |     |
|--------------------|-----------|--------------|-----------|----------|----------|-----------|------|-----|
| ENSMUSG00000081665 | 1,79E-01  | 6,162161644  | 7,67E+00  | 5,62E-03 | 6,09E-02 | Gm15922   | 1,13 | No  |
| ENSMUSG00000081666 | 2,61E+00  | -3,033672762 | 2,63E+00  | 1,05E-01 | 3,97E-01 | Gm11677   | 6,10 | No  |
| ENSMUSG00000081668 | -1,06E-01 | -0,236798009 | 1,11E-01  | 7,39E-01 | 9,26E-01 | Gm7869    | 0,93 | No  |
| ENSMUSG00000081669 | -1,50E-01 | 4,432297494  | 3,32E+00  | 6,85E-02 | 3,29E-01 | Npm3-ps1  | 0,90 | No  |
| ENSMUSG00000081670 | 1,89E-01  | 2,814890491  | 2,51E+00  | 1,13E-01 | 4,15E-01 | Gm15697   | 1,14 | No  |
| ENSMUSG00000081671 | 4,24E-02  | 3,160642713  | 1,53E-01  | 6,96E-01 | 9,03E-01 | Gm13167   | 1,03 | No  |
| ENSMUSG00000081672 | -1,89E+00 | -3,1076441   | 1,42E+00  | 2,33E-01 | 5,50E-01 | Gm13000   | 0,27 | No  |
| ENSMUSG00000081675 | -2,96E-01 | 0,616190099  | 1,50E+00  | 2,20E-01 | 5,50E-01 | Gm12712   | 0,81 | No  |
| ENSMUSG00000081677 | 1,23E+00  | -2,655089436 | 9,37E-01  | 3,33E-01 | 6,34E-01 | Mdk-ps1   | 2,34 | No  |
| ENSMUSG00000081678 | -3,83E-02 | -3,107651936 | -7,91E-11 | 1,00E+00 | 1,00E+00 | Gm12959   | 0,97 | No  |
| ENSMUSG00000081679 | -8,61E-03 | -0,980549309 | 3,54E-04  | 9,85E-01 | 1,00E+00 | Gm11874   | 0,99 | No  |
| ENSMUSG00000081683 | 7,56E-02  | -1,740807706 | 1,26E-02  | 9,10E-01 | 1,00E+00 | Fzd10     | 1,05 | No  |
| ENSMUSG00000081688 | -2,71E+00 | -3,033620915 | 2,92E+00  | 8,75E-02 | 3,78E-01 | Gm12499   | 0,15 | No  |
| ENSMUSG00000081692 | -1,89E+00 | -2,896130167 | 1,43E+00  | 2,31E-01 | 5,50E-01 | Gm15971   | 0,27 | No  |
| ENSMUSG00000081695 | -3,31E-01 | 3,731152339  | 1,24E+01  | 4,33E-04 | 8,13E-03 | Rpsa-ps5  | 0,80 | Yes |
| ENSMUSG00000081700 | -1,51E-01 | 5,329290786  | 4,57E+00  | 3,25E-02 | 2,10E-01 | Atp5k-ps2 | 0,90 | No  |
| ENSMUSG00000081705 | 1,33E-01  | 2,21393462   | 8,31E-01  | 3,62E-01 | 6,63E-01 | Gm12582   | 1,10 | No  |
| ENSMUSG00000081707 | 3,14E-02  | -3,107617333 | -7,69E-10 | 1,00E+00 | 1,00E+00 | Gm11343   | 1,02 | No  |
| ENSMUSG00000081712 | 1,01E-01  | 3,708693722  | 1,11E+00  | 2,93E-01 | 5,88E-01 | Gm12096   | 1,07 | No  |
| ENSMUSG00000081715 | -4,12E-01 | 5,100404032  | 3,19E+01  | 1,66E-08 | 1,10E-06 | Rps11-ps3 | 0,75 | Yes |
| ENSMUSG00000081719 | -1,87E+00 | -3,107637761 | 1,39E+00  | 2,38E-01 | 5,50E-01 | Gm13726   | 0,27 | No  |
| ENSMUSG00000081720 | -4,87E-02 | -2,711744789 | 1,62E-03  | 9,68E-01 | 1,00E+00 | Gm12391   | 0,97 | No  |
| ENSMUSG00000081721 | 3,73E-01  | 1,535906002  | 4,33E+00  | 3,75E-02 | 2,30E-01 | Gm13882   | 1,29 | No  |
| ENSMUSG00000081723 | 1,04E-01  | 5,57309836   | 2,31E+00  | 1,29E-01 | 4,50E-01 | Gm15931   | 1,07 | No  |
| ENSMUSG00000081730 | 1,24E+00  | -2,770618059 | 9,48E-01  | 3,30E-01 | 6,31E-01 | Gm13785   | 2,36 | No  |
| ENSMUSG00000081731 | 7,57E-02  | 5,867552464  | 1,30E+00  | 2,54E-01 | 5,50E-01 | Calr-ps   | 1,05 | No  |
| ENSMUSG00000081732 | -2,62E-01 | 2,907826566  | 5,28E+00  | 2,16E-02 | 1,58E-01 | Gm15495   | 0,83 | No  |
| ENSMUSG00000081733 | 1,22E+00  | -2,711775297 | 9,22E-01  | 3,37E-01 | 6,38E-01 | Gm12852   | 2,33 | No  |
| ENSMUSG00000081740 | -2,27E-01 | 2,895161026  | 3,83E+00  | 5,02E-02 | 2,72E-01 | Gm14279   | 0,85 | No  |
| ENSMUSG00000081744 | 4,89E-01  | -2,448675987 | 3,24E-01  | 5,69E-01 | 8,30E-01 | Gm5721    | 1,40 | No  |
| ENSMUSG00000081745 | -2,47E-01 | -1,448730725 | 2,42E-01  | 6,22E-01 | 8,58E-01 | Gm15549   | 0,84 | No  |
| ENSMUSG00000081746 | 2,94E-01  | -0,155939884 | 8,79E-01  | 3,48E-01 | 6,50E-01 | Gm13925   | 1,23 | No  |

|                    |           |              |           |          |          |               |      |     |
|--------------------|-----------|--------------|-----------|----------|----------|---------------|------|-----|
| ENSMUSG00000081747 | 1,15E+00  | -2,655121981 | 1,26E+00  | 2,61E-01 | 5,55E-01 | Rpl7a-ps9     | 2,22 | No  |
| ENSMUSG00000081749 | -7,38E-02 | -3,033659033 | 2,66E-03  | 9,59E-01 | 1,00E+00 | Gm12241       | 0,95 | No  |
| ENSMUSG00000081751 | -5,14E-01 | -1,145970586 | 1,33E+00  | 2,49E-01 | 5,50E-01 | Gm14251       | 0,70 | No  |
| ENSMUSG00000081756 | -7,02E-01 | -1,831839174 | 1,12E+00  | 2,89E-01 | 5,85E-01 | Gm12291       | 0,61 | No  |
| ENSMUSG00000081757 | 1,64E+00  | -2,832037269 | 1,85E+00  | 1,74E-01 | 5,31E-01 | Gm13798       | 3,12 | No  |
| ENSMUSG00000081758 | -3,94E-01 | 2,138887285  | 7,71E+00  | 5,48E-03 | 5,98E-02 | Gm11460       | 0,76 | No  |
| ENSMUSG00000081766 | 3,14E-02  | -3,107617333 | -7,69E-10 | 1,00E+00 | 1,00E+00 | 2210409E12Rik | 1,02 | No  |
| ENSMUSG00000081769 | -5,51E-01 | -0,711552147 | 2,16E+00  | 1,41E-01 | 4,75E-01 | Gm12216       | 0,68 | No  |
| ENSMUSG00000081770 | -1,87E+00 | -3,107637761 | 1,39E+00  | 2,38E-01 | 5,50E-01 | Rbpsuh-ps1    | 0,27 | No  |
| ENSMUSG00000081772 | -1,09E-01 | -0,321947642 | 1,03E-01  | 7,48E-01 | 9,30E-01 | Gm13131       | 0,93 | No  |
| ENSMUSG00000081775 | -7,25E-02 | 2,703924521  | 3,64E-01  | 5,46E-01 | 8,14E-01 | Gm12420       | 0,95 | No  |
| ENSMUSG00000081777 | 9,01E-03  | -3,107646452 | -5,16E-10 | 1,00E+00 | 1,00E+00 | Gm14159       | 1,01 | No  |
| ENSMUSG00000081783 | -8,29E-01 | -0,800782358 | 3,74E+00  | 5,32E-02 | 2,82E-01 | Gm15599       | 0,56 | No  |
| ENSMUSG00000081787 | -1,47E-02 | 5,326386762  | 4,35E-02  | 8,35E-01 | 9,80E-01 | Gm13991       | 0,99 | No  |
| ENSMUSG00000081788 | -1,87E-02 | 6,251195392  | 8,48E-02  | 7,71E-01 | 9,42E-01 | Gm5898        | 0,99 | No  |
| ENSMUSG00000081789 | 5,12E-01  | -1,401288547 | 9,60E-01  | 3,27E-01 | 6,28E-01 | Gm11893       | 1,43 | No  |
| ENSMUSG00000081792 | 1,08E-01  | 6,246812299  | 2,84E+00  | 9,22E-02 | 3,82E-01 | Anp32b-ps1    | 1,08 | No  |
| ENSMUSG00000081798 | -1,13E+00 | -2,801004119 | 7,50E-01  | 3,86E-01 | 6,87E-01 | Gm8152        | 0,46 | No  |
| ENSMUSG00000081800 | -3,16E-01 | 0,622273055  | 1,73E+00  | 1,88E-01 | 5,50E-01 | Gm14200       | 0,80 | No  |
| ENSMUSG00000081801 | 4,93E-01  | -2,355584019 | 3,30E-01  | 5,66E-01 | 8,28E-01 | Dnmt3l-ps1    | 1,41 | No  |
| ENSMUSG00000081805 | 4,24E-03  | 2,260783285  | 8,81E-04  | 9,76E-01 | 1,00E+00 | Gm14335       | 1,00 | No  |
| ENSMUSG00000081809 | 7,12E-01  | -1,136244578 | 2,06E+00  | 1,51E-01 | 4,93E-01 | Gm15539       | 1,64 | No  |
| ENSMUSG00000081810 | -2,66E-01 | 5,018999555  | 1,30E+01  | 3,04E-04 | 6,12E-03 | Gm11878       | 0,83 | Yes |
| ENSMUSG00000081811 | -2,04E+00 | -2,711665771 | 3,16E+00  | 7,54E-02 | 3,49E-01 | Gm12713       | 0,24 | No  |
| ENSMUSG00000081816 | 6,48E-02  | 2,068241988  | 1,99E-01  | 6,55E-01 | 8,79E-01 | Gm15528       | 1,05 | No  |
| ENSMUSG00000081817 | -5,08E-01 | -0,641268071 | 2,02E+00  | 1,55E-01 | 4,99E-01 | Gm13590       | 0,70 | No  |
| ENSMUSG00000081819 | -4,72E-03 | 2,950628841  | 1,70E-03  | 9,67E-01 | 1,00E+00 | Gm12722       | 1,00 | No  |
| ENSMUSG00000081824 | -1,26E-01 | 4,925523923  | 2,80E+00  | 9,44E-02 | 3,85E-01 | BC002163      | 0,92 | No  |
| ENSMUSG00000081829 | 6,84E-01  | -1,54826742  | 1,61E+00  | 2,04E-01 | 5,50E-01 | Gm15460       | 1,61 | No  |
| ENSMUSG00000081833 | 1,35E-01  | 3,282107135  | 1,65E+00  | 1,99E-01 | 5,50E-01 | Gm13669       | 1,10 | No  |
| ENSMUSG00000081835 | -1,13E-01 | -2,963254935 | 5,86E-03  | 9,39E-01 | 1,00E+00 | Gm11790       | 0,92 | No  |
| ENSMUSG00000081838 | -6,43E-02 | -2,548234065 | 4,73E-03  | 9,45E-01 | 1,00E+00 | Gm13038       | 0,96 | No  |

|                    |           |              |          |          |          |            |      |     |
|--------------------|-----------|--------------|----------|----------|----------|------------|------|-----|
| ENSMUSG00000081841 | 1,24E-01  | 2,621028853  | 9,92E-01 | 3,19E-01 | 6,20E-01 | Gm13444    | 1,09 | No  |
| ENSMUSG00000081852 | -2,88E-01 | -2,311195575 | 1,44E-01 | 7,05E-01 | 9,07E-01 | Gm12281    | 0,82 | No  |
| ENSMUSG00000081853 | -3,42E-01 | 0,496342978  | 2,12E+00 | 1,45E-01 | 4,82E-01 | Gm13735    | 0,79 | No  |
| ENSMUSG00000081854 | 1,84E+00  | -2,896167046 | 1,33E+00 | 2,48E-01 | 5,50E-01 | Gm11447    | 3,58 | No  |
| ENSMUSG00000081855 | -2,51E-01 | 6,652774513  | 1,65E+01 | 4,99E-05 | 1,36E-03 | Rpl17-ps5  | 0,84 | Yes |
| ENSMUSG00000081857 | -4,07E-02 | 0,74003525   | 3,24E-02 | 8,57E-01 | 9,94E-01 | Gm13624    | 0,97 | No  |
| ENSMUSG00000081860 | -9,57E-01 | -2,548252635 | 8,02E-01 | 3,70E-01 | 6,72E-01 | Gm11533    | 0,52 | No  |
| ENSMUSG00000081861 | -8,19E-01 | -2,401428704 | 9,78E-01 | 3,23E-01 | 6,23E-01 | Gm14441    | 0,57 | No  |
| ENSMUSG00000081865 | -2,46E-01 | 3,014292994  | 4,77E+00 | 2,89E-02 | 1,93E-01 | Gm15484    | 0,84 | No  |
| ENSMUSG00000081866 | 1,87E+00  | -3,03364371  | 1,36E+00 | 2,43E-01 | 5,50E-01 | Gm12401    | 3,66 | No  |
| ENSMUSG00000081868 | -1,64E-01 | 0,962049489  | 6,31E-01 | 4,27E-01 | 7,21E-01 | Gm12039    | 0,89 | No  |
| ENSMUSG00000081871 | -8,87E-02 | 3,966446488  | 9,65E-01 | 3,26E-01 | 6,27E-01 | Gm11488    | 0,94 | No  |
| ENSMUSG00000081872 | -4,45E-02 | -2,655096141 | 1,78E-03 | 9,66E-01 | 1,00E+00 | Gm15572    | 0,97 | No  |
| ENSMUSG00000081873 | -2,71E+00 | -2,963235336 | 2,92E+00 | 8,75E-02 | 3,78E-01 | Gm15197    | 0,15 | No  |
| ENSMUSG00000081883 | 3,30E-01  | -2,655148664 | 1,11E-01 | 7,39E-01 | 9,26E-01 | Gm15574    | 1,26 | No  |
| ENSMUSG00000081884 | 9,21E-02  | 2,744973733  | 5,65E-01 | 4,52E-01 | 7,42E-01 | Gm11821    | 1,07 | No  |
| ENSMUSG00000081885 | 1,23E-01  | 3,480167009  | 1,51E+00 | 2,19E-01 | 5,50E-01 | Gm13231    | 1,09 | No  |
| ENSMUSG00000081887 | 1,33E-01  | 4,162969105  | 2,36E+00 | 1,24E-01 | 4,41E-01 | Gm12097    | 1,10 | No  |
| ENSMUSG00000081888 | 7,64E-02  | 4,680626604  | 9,58E-01 | 3,28E-01 | 6,29E-01 | Spcs2-ps   | 1,05 | No  |
| ENSMUSG00000081893 | 1,81E+00  | -3,10765737  | 1,28E+00 | 2,58E-01 | 5,50E-01 | Gm13273    | 3,49 | No  |
| ENSMUSG00000081894 | -3,24E+00 | -2,896104886 | 4,43E+00 | 3,53E-02 | 2,22E-01 | Gm14212    | 0,11 | No  |
| ENSMUSG00000081895 | -2,00E-01 | 7,491339979  | 1,14E+01 | 7,36E-04 | 1,26E-02 | Rpl17-ps10 | 0,87 | Yes |
| ENSMUSG00000081905 | 1,81E+00  | -3,10765737  | 1,28E+00 | 2,58E-01 | 5,50E-01 | Gm11370    | 3,49 | No  |
| ENSMUSG00000081906 | 5,90E-01  | -0,529341969 | 3,03E+00 | 8,18E-02 | 3,67E-01 | Rpl9-ps1   | 1,51 | No  |
| ENSMUSG00000081907 | -1,53E-01 | 0,934377622  | 5,57E-01 | 4,56E-01 | 7,45E-01 | Gm13731    | 0,90 | No  |
| ENSMUSG00000081911 | 1,29E-01  | 2,883243716  | 1,19E+00 | 2,75E-01 | 5,71E-01 | Mrps36-ps2 | 1,09 | No  |
| ENSMUSG00000081920 | 1,09E-01  | 4,470425615  | 1,78E+00 | 1,83E-01 | 5,45E-01 | Gm15359    | 1,08 | No  |
| ENSMUSG00000081921 | -5,71E-01 | -0,006699306 | 3,82E+00 | 5,06E-02 | 2,73E-01 | Gm12858    | 0,67 | No  |
| ENSMUSG00000081924 | 1,21E-02  | -3,033650469 | 7,34E-11 | 1,00E+00 | 1,00E+00 | Gm11191    | 1,01 | No  |
| ENSMUSG00000081926 | -2,66E-01 | 3,399266543  | 6,92E+00 | 8,53E-03 | 8,31E-02 | Gm15536    | 0,83 | No  |
| ENSMUSG00000081929 | -1,94E-01 | 5,243135794  | 7,41E+00 | 6,50E-03 | 6,80E-02 | Rps11-ps2  | 0,87 | No  |
| ENSMUSG00000081932 | -5,94E-01 | -2,401365899 | 4,80E-01 | 4,88E-01 | 7,75E-01 | Gm12331    | 0,66 | No  |

|                    |           |              |           |          |          |            |      |     |
|--------------------|-----------|--------------|-----------|----------|----------|------------|------|-----|
| ENSMUSG00000081944 | -1,83E-01 | 0,655597711  | 5,84E-01  | 4,45E-01 | 7,36E-01 | Gm12276    | 0,88 | No  |
| ENSMUSG00000081949 | -2,36E+00 | -2,997958949 | 2,18E+00  | 1,40E-01 | 4,72E-01 | Gm14392    | 0,19 | No  |
| ENSMUSG00000081950 | -1,89E+00 | -3,1076441   | 1,42E+00  | 2,33E-01 | 5,50E-01 | Gm11600    | 0,27 | No  |
| ENSMUSG00000081951 | 4,45E-01  | -2,448660537 | 1,55E-01  | 6,94E-01 | 9,02E-01 | Gm15352    | 1,36 | No  |
| ENSMUSG00000081952 | 1,93E-01  | 2,171584797  | 1,79E+00  | 1,80E-01 | 5,42E-01 | Gm12178    | 1,14 | No  |
| ENSMUSG00000081953 | 1,39E-02  | 6,067174727  | 4,54E-02  | 8,31E-01 | 9,78E-01 | Gm12435    | 1,01 | No  |
| ENSMUSG00000081954 | -1,92E+00 | -3,0336536   | 1,46E+00  | 2,27E-01 | 5,50E-01 | Gm13626    | 0,26 | No  |
| ENSMUSG00000081957 | 2,79E-01  | 1,44148554   | 2,53E+00  | 1,11E-01 | 4,10E-01 | Ak3l2-ps   | 1,21 | No  |
| ENSMUSG00000081958 | -1,52E-02 | -2,831963104 | 1,73E-04  | 9,90E-01 | 1,00E+00 | Gm11594    | 0,99 | No  |
| ENSMUSG00000081965 | 1,44E-01  | -1,26807879  | 6,72E-02  | 7,95E-01 | 9,57E-01 | Gm11620    | 1,10 | No  |
| ENSMUSG00000081967 | 6,45E-02  | 4,04648858   | 5,36E-01  | 4,64E-01 | 7,53E-01 | Gm14017    | 1,05 | No  |
| ENSMUSG00000081968 | 3,21E-01  | -2,548244327 | 1,05E-01  | 7,46E-01 | 9,29E-01 | Rpl23a-ps2 | 1,25 | No  |
| ENSMUSG00000081971 | 3,14E-02  | -3,107617333 | -7,69E-10 | 1,00E+00 | 1,00E+00 | Gm14115    | 1,02 | No  |
| ENSMUSG00000081974 | -9,55E-02 | 3,183829596  | 7,95E-01  | 3,73E-01 | 6,74E-01 | Gm11960    | 0,94 | No  |
| ENSMUSG00000081975 | -3,37E-01 | 5,070129347  | 2,10E+01  | 4,58E-06 | 1,67E-04 | Gm12482    | 0,79 | Yes |
| ENSMUSG00000081984 | -3,51E-01 | -0,510074433 | 1,01E+00  | 3,15E-01 | 6,16E-01 | Dnajb3     | 0,78 | No  |
| ENSMUSG00000081985 | 1,02E-01  | 2,161910408  | 4,85E-01  | 4,86E-01 | 7,73E-01 | Gng2-ps1   | 1,07 | No  |
| ENSMUSG00000081988 | -1,94E+00 | -3,107619243 | 1,50E+00  | 2,21E-01 | 5,50E-01 | Gm15746    | 0,26 | No  |
| ENSMUSG00000081991 | 1,85E+00  | -3,107657832 | 1,35E+00  | 2,46E-01 | 5,50E-01 | Gm13859    | 3,61 | No  |
| ENSMUSG00000081992 | -6,45E-02 | 6,31531522   | 1,03E+00  | 3,11E-01 | 6,11E-01 | Gm13408    | 0,96 | No  |
| ENSMUSG00000081998 | -3,17E-01 | 1,396517304  | 3,31E+00  | 6,89E-02 | 3,31E-01 | Gm13245    | 0,80 | No  |
| ENSMUSG00000081999 | 6,80E-02  | 7,40453745   | 1,31E+00  | 2,53E-01 | 5,50E-01 | Gm13461    | 1,05 | No  |
| ENSMUSG00000082001 | -3,76E-01 | -1,641338191 | 4,18E-01  | 5,18E-01 | 7,98E-01 | Gm15607    | 0,77 | No  |
| ENSMUSG00000082006 | 7,13E-01  | -2,831983747 | 2,77E-01  | 5,99E-01 | 8,46E-01 | Gm13649    | 1,64 | No  |
| ENSMUSG00000082008 | -1,98E-02 | -3,033655952 | 2,83E-11  | 1,00E+00 | 1,00E+00 | Gm12390    | 0,99 | No  |
| ENSMUSG00000082012 | 1,87E+00  | -3,107639691 | 1,38E+00  | 2,40E-01 | 5,50E-01 | Gm5257     | 3,67 | No  |
| ENSMUSG00000082013 | -8,89E-03 | 0,010795695  | 9,44E-04  | 9,75E-01 | 1,00E+00 | Gm13216    | 0,99 | No  |
| ENSMUSG00000082016 | 2,27E-01  | 8,091181656  | 1,52E+01  | 9,81E-05 | 2,39E-03 | Pgam1-ps2  | 1,17 | Yes |
| ENSMUSG00000082023 | -1,92E+00 | -3,0336536   | 1,46E+00  | 2,27E-01 | 5,50E-01 | Gm14407    | 0,26 | No  |
| ENSMUSG00000082024 | 7,31E-01  | -2,10771273  | 9,53E-01  | 3,29E-01 | 6,30E-01 | Gm11794    | 1,66 | No  |
| ENSMUSG00000082028 | 2,45E-01  | 5,262070181  | 1,17E+01  | 6,21E-04 | 1,10E-02 | Gm1826     | 1,19 | Yes |
| ENSMUSG00000082029 | -3,08E-02 | 6,611180043  | 2,45E-01  | 6,20E-01 | 8,57E-01 | H3f3c      | 0,98 | No  |



|                    |           |              |          |          |          |           |  |      |     |
|--------------------|-----------|--------------|----------|----------|----------|-----------|--|------|-----|
| ENSMUSG00000082032 | 1,84E+00  | -3,033649193 | 1,33E+00 | 2,49E-01 | 5,50E-01 | Gm12271   |  | 3,58 | No  |
| ENSMUSG00000082036 | -5,33E-01 | -2,8320035   | 2,20E-01 | 6,39E-01 | 8,69E-01 | Gm13724   |  | 0,69 | No  |
| ENSMUSG00000082040 | 8,69E-01  | -2,401362084 | 9,09E-01 | 3,40E-01 | 6,41E-01 | Gm12046   |  | 1,83 | No  |
| ENSMUSG00000082043 | 6,55E-02  | 1,539307926  | 1,45E-01 | 7,03E-01 | 9,06E-01 | Gm12848   |  | 1,05 | No  |
| ENSMUSG00000082044 | -1,81E-01 | 5,248542438  | 6,39E+00 | 1,15E-02 | 1,03E-01 | Snrpert   |  | 0,88 | No  |
| ENSMUSG00000082045 | -1,01E-01 | 3,472963241  | 1,00E+00 | 3,16E-01 | 6,17E-01 | Gm11585   |  | 0,93 | No  |
| ENSMUSG00000082047 | -1,89E+00 | -3,1076441   | 1,42E+00 | 2,33E-01 | 5,50E-01 | Gm12948   |  | 0,27 | No  |
| ENSMUSG00000082049 | 2,61E+00  | -3,033672762 | 2,63E+00 | 1,05E-01 | 3,97E-01 | Gm12105   |  | 6,10 | No  |
| ENSMUSG00000082051 | -5,32E-02 | 2,790989779  | 1,97E-01 | 6,57E-01 | 8,80E-01 | Gm16072   |  | 0,96 | No  |
| ENSMUSG00000082052 | -7,13E-01 | -1,332995133 | 1,92E+00 | 1,66E-01 | 5,18E-01 | Ywhaq-ps2 |  | 0,61 | No  |
| ENSMUSG00000082057 | 2,01E-02  | -1,522813944 | 1,45E-03 | 9,70E-01 | 1,00E+00 | Gm15789   |  | 1,01 | No  |
| ENSMUSG00000082059 | 1,87E+00  | -3,107639691 | 1,38E+00 | 2,40E-01 | 5,50E-01 | Gm15183   |  | 3,67 | No  |
| ENSMUSG00000082062 | 9,96E-02  | 10,0556669   | 3,13E+00 | 7,68E-02 | 3,53E-01 | Ftl2-ps   |  | 1,07 | No  |
| ENSMUSG00000082063 | -1,87E+00 | -3,107637761 | 1,39E+00 | 2,38E-01 | 5,50E-01 | Gm12993   |  | 0,27 | No  |
| ENSMUSG00000082064 | -2,25E-01 | 5,245787333  | 9,97E+00 | 1,59E-03 | 2,34E-02 | Rpl5-ps2  |  | 0,86 | Yes |
| ENSMUSG00000082066 | 1,44E-01  | 4,509727391  | 3,19E+00 | 7,39E-02 | 3,45E-01 | Gm13904   |  | 1,10 | No  |
| ENSMUSG00000082072 | -1,47E-01 | -0,389904618 | 1,91E-01 | 6,62E-01 | 8,83E-01 | Gm15785   |  | 0,90 | No  |
| ENSMUSG00000082079 | -8,77E-01 | -2,770573317 | 4,21E-01 | 5,17E-01 | 7,97E-01 | Dnmt3c    |  | 0,54 | No  |
| ENSMUSG00000082080 | 7,98E-01  | -0,548429501 | 4,96E+00 | 2,60E-02 | 1,80E-01 | Gm9246    |  | 1,74 | No  |
| ENSMUSG00000082082 | -9,99E-01 | -2,601235609 | 9,98E-01 | 3,18E-01 | 6,19E-01 | Gm13230   |  | 0,50 | No  |
| ENSMUSG00000082087 | 9,59E-02  | 4,595142107  | 1,45E+00 | 2,28E-01 | 5,50E-01 | Gm12138   |  | 1,07 | No  |
| ENSMUSG00000082088 | -8,07E-02 | 4,681327766  | 1,08E+00 | 2,99E-01 | 5,95E-01 | Gm15753   |  | 0,95 | No  |
| ENSMUSG00000082093 | 1,25E+00  | -1,896214138 | 3,28E+00 | 7,00E-02 | 3,34E-01 | Gm15928   |  | 2,38 | No  |
| ENSMUSG00000082095 | 3,48E-02  | 2,555775957  | 7,59E-02 | 7,83E-01 | 9,50E-01 | Gm11991   |  | 1,02 | No  |
| ENSMUSG00000082096 | -1,73E-01 | -0,668912138 | 2,16E-01 | 6,42E-01 | 8,71E-01 | Gm13505   |  | 0,89 | No  |
| ENSMUSG00000082097 | 1,87E+00  | -3,107639691 | 1,38E+00 | 2,40E-01 | 5,50E-01 | Gm14039   |  | 3,67 | No  |
| ENSMUSG00000082099 | -3,91E-01 | 4,114287683  | 1,97E+01 | 9,20E-06 | 3,12E-04 | Gm12013   |  | 0,76 | Yes |
| ENSMUSG00000082100 | -2,18E-02 | 3,869541734  | 5,75E-02 | 8,10E-01 | 9,66E-01 | Glms-ps1  |  | 0,99 | No  |
| ENSMUSG00000082101 | -2,31E+00 | -1,963176574 | 7,20E+00 | 7,27E-03 | 7,38E-02 | Slfn14    |  | 0,20 | No  |
| ENSMUSG00000082103 | -4,37E-01 | -2,497554436 | 1,95E-01 | 6,59E-01 | 8,81E-01 | Gm15320   |  | 0,74 | No  |
| ENSMUSG00000082107 | 7,46E-02  | 2,64839398   | 3,51E-01 | 5,53E-01 | 8,19E-01 | Gm16216   |  | 1,05 | No  |
| ENSMUSG00000082108 | 4,09E-01  | -2,77063723  | 1,29E-01 | 7,19E-01 | 9,15E-01 | Gm13777   |  | 1,33 | No  |

|                    |           |              |           |          |          |           |      |     |
|--------------------|-----------|--------------|-----------|----------|----------|-----------|------|-----|
| ENSMUSG00000082110 | -4,23E-01 | 0,330924894  | 2,72E+00  | 9,91E-02 | 3,92E-01 | Gm11196   | 0,75 | No  |
| ENSMUSG00000082111 | 4,11E-01  | -1,600645529 | 5,05E-01  | 4,77E-01 | 7,65E-01 | Gm12479   | 1,33 | No  |
| ENSMUSG00000082113 | -1,76E+00 | -2,600615253 | 1,55E+00  | 2,13E-01 | 5,50E-01 | Gm13915   | 0,29 | No  |
| ENSMUSG00000082116 | -5,61E-01 | -2,268093892 | 4,66E-01  | 4,95E-01 | 7,80E-01 | Gm12188   | 0,68 | No  |
| ENSMUSG00000082118 | -3,83E-02 | -3,107651936 | -7,91E-11 | 1,00E+00 | 1,00E+00 | Gm13862   | 0,97 | No  |
| ENSMUSG00000082120 | -1,09E-01 | 4,224405633  | 1,69E+00  | 1,94E-01 | 5,50E-01 | Gm15720   | 0,93 | No  |
| ENSMUSG00000082122 | -4,26E-02 | 0,191245485  | 2,52E-02  | 8,74E-01 | 1,00E+00 | Gm11809   | 0,97 | No  |
| ENSMUSG00000082123 | -8,70E-01 | -2,896167824 | 4,16E-01  | 5,19E-01 | 7,98E-01 | Gm16149   | 0,55 | No  |
| ENSMUSG00000082127 | -2,00E-01 | 2,456639406  | 2,30E+00  | 1,30E-01 | 4,52E-01 | Gm13577   | 0,87 | No  |
| ENSMUSG00000082128 | -1,79E-01 | 4,280096901  | 4,65E+00  | 3,10E-02 | 2,03E-01 | Gm11824   | 0,88 | No  |
| ENSMUSG00000082130 | 7,44E-01  | -2,963286135 | 3,02E-01  | 5,83E-01 | 8,38E-01 | Gm15799   | 1,67 | No  |
| ENSMUSG00000082140 | 4,25E-01  | -2,832034501 | 1,40E-01  | 7,08E-01 | 9,09E-01 | Gm13094   | 1,34 | No  |
| ENSMUSG00000082141 | 8,20E-02  | 0,916023761  | 1,52E-01  | 6,97E-01 | 9,03E-01 | Gm11212   | 1,06 | No  |
| ENSMUSG00000082144 | 4,33E-01  | -2,401393067 | 1,47E-01  | 7,02E-01 | 9,05E-01 | Gm12788   | 1,35 | No  |
| ENSMUSG00000082145 | 2,28E-02  | 3,767095434  | 6,04E-02  | 8,06E-01 | 9,63E-01 | Gm12312   | 1,02 | No  |
| ENSMUSG00000082148 | 7,13E-01  | -2,60070017  | 2,78E-01  | 5,98E-01 | 8,45E-01 | Gm12266   | 1,64 | No  |
| ENSMUSG00000082151 | -1,59E-02 | -2,96323932  | 1,18E-04  | 9,91E-01 | 1,00E+00 | Gm11810   | 0,99 | No  |
| ENSMUSG00000082154 | 1,41E-01  | 3,120022496  | 1,63E+00  | 2,02E-01 | 5,50E-01 | Gm16464   | 1,10 | No  |
| ENSMUSG00000082160 | -3,83E-02 | -3,107651936 | -7,91E-11 | 1,00E+00 | 1,00E+00 | Gm11578   | 0,97 | No  |
| ENSMUSG00000082163 | 6,95E-02  | 1,464248599  | 1,51E-01  | 6,98E-01 | 9,04E-01 | Gm14276   | 1,05 | No  |
| ENSMUSG00000082164 | 1,62E-01  | 0,425529087  | 4,14E-01  | 5,20E-01 | 7,99E-01 | Gm13360   | 1,12 | No  |
| ENSMUSG00000082171 | -8,51E-01 | -1,378269629 | 2,86E+00  | 9,06E-02 | 3,82E-01 | Rpl27-ps2 | 0,55 | No  |
| ENSMUSG00000082176 | 1,81E-01  | -0,824274002 | 1,99E-01  | 6,55E-01 | 8,79E-01 | Gm13163   | 1,13 | No  |
| ENSMUSG00000082179 | -2,47E-01 | -1,401275143 | 2,42E-01  | 6,23E-01 | 8,58E-01 | Gm11407   | 0,84 | No  |
| ENSMUSG00000082180 | -2,42E-01 | -1,831863817 | 1,16E-01  | 7,34E-01 | 9,23E-01 | Gm12230   | 0,85 | No  |
| ENSMUSG00000082183 | 1,45E-01  | -1,600782379 | 6,88E-02  | 7,93E-01 | 9,56E-01 | Gm15994   | 1,11 | No  |
| ENSMUSG00000082185 | 6,19E-02  | 5,010720835  | 7,03E-01  | 4,02E-01 | 7,00E-01 | Gm12428   | 1,04 | No  |
| ENSMUSG00000082186 | 3,29E-01  | -1,627785329 | 2,87E-01  | 5,92E-01 | 8,42E-01 | Gm12403   | 1,26 | No  |
| ENSMUSG00000082187 | -8,70E-01 | -2,963240767 | 4,18E-01  | 5,18E-01 | 7,98E-01 | Gm13670   | 0,55 | No  |
| ENSMUSG00000082190 | 2,64E+00  | -2,71168463  | 2,69E+00  | 1,01E-01 | 3,92E-01 | Gm13641   | 6,25 | No  |
| ENSMUSG00000082193 | -1,75E-01 | 6,850540749  | 8,21E+00  | 4,17E-03 | 4,88E-02 | Rpl5-ps1  | 0,89 | Yes |
| ENSMUSG00000082194 | 1,71E-02  | 3,814022078  | 3,39E-02  | 8,54E-01 | 9,92E-01 | Gm12444   | 1,01 | No  |

|                    |           |              |          |          |          |          |      |    |
|--------------------|-----------|--------------|----------|----------|----------|----------|------|----|
| ENSMUSG00000082195 | 1,41E-01  | 4,319692763  | 2,89E+00 | 8,92E-02 | 3,79E-01 | Gm13034  | 1,10 | No |
| ENSMUSG00000082196 | -2,63E-01 | -2,107687626 | 1,37E-01 | 7,12E-01 | 9,11E-01 | Gm14231  | 0,83 | No |
| ENSMUSG00000082200 | -1,08E-01 | -2,896148415 | 8,40E-03 | 9,27E-01 | 1,00E+00 | Gm12871  | 0,93 | No |
| ENSMUSG00000082203 | 2,32E-01  | 0,470902957  | 8,14E-01 | 3,67E-01 | 6,68E-01 | Gm15636  | 1,17 | No |
| ENSMUSG00000082210 | 1,87E+00  | -3,107639691 | 1,38E+00 | 2,40E-01 | 5,50E-01 | Gm14382  | 3,67 | No |
| ENSMUSG00000082213 | 7,53E-01  | -2,770600824 | 3,08E-01 | 5,79E-01 | 8,36E-01 | Gm12102  | 1,69 | No |
| ENSMUSG00000082217 | 4,04E-01  | -0,165850969 | 1,64E+00 | 2,00E-01 | 5,50E-01 | Gm1401   | 1,32 | No |
| ENSMUSG00000082218 | -1,86E-01 | -0,006957765 | 3,94E-01 | 5,30E-01 | 8,05E-01 | Gm13602  | 0,88 | No |
| ENSMUSG00000082220 | 2,57E+00  | -3,0336723   | 2,56E+00 | 1,10E-01 | 4,06E-01 | Gm12943  | 5,96 | No |
| ENSMUSG00000082233 | -3,88E-03 | -3,03362684  | 4,02E-12 | 1,00E+00 | 1,00E+00 | Gm6506   | 1,00 | No |
| ENSMUSG00000082234 | 1,81E+00  | -3,10765737  | 1,28E+00 | 2,58E-01 | 5,50E-01 | Gm16221  | 3,49 | No |
| ENSMUSG00000082241 | -3,70E-02 | 5,15455007   | 2,62E-01 | 6,09E-01 | 8,51E-01 | Gng5-ps  | 0,97 | No |
| ENSMUSG00000082243 | 6,55E-01  | 0,295258398  | 6,02E+00 | 1,41E-02 | 1,21E-01 | Gm3810   | 1,57 | No |
| ENSMUSG00000082247 | -1,84E-01 | 1,66404958   | 1,22E+00 | 2,70E-01 | 5,66E-01 | Gm16074  | 0,88 | No |
| ENSMUSG00000082248 | -2,73E-01 | -0,024296331 | 8,43E-01 | 3,59E-01 | 6,60E-01 | Gm13161  | 0,83 | No |
| ENSMUSG00000082250 | 3,05E-01  | -0,880104182 | 5,67E-01 | 4,51E-01 | 7,41E-01 | Gm12181  | 1,24 | No |
| ENSMUSG00000082252 | 7,52E-02  | -0,015729429 | 6,45E-02 | 7,99E-01 | 9,60E-01 | Gm11204  | 1,05 | No |
| ENSMUSG00000082258 | -1,04E-02 | 3,708341732  | 1,20E-02 | 9,13E-01 | 1,00E+00 | Gm15289  | 0,99 | No |
| ENSMUSG00000082264 | 1,84E-01  | 4,258951907  | 4,77E+00 | 2,89E-02 | 1,93E-01 | Gm12799  | 1,14 | No |
| ENSMUSG00000082265 | -1,32E-01 | -0,401293899 | 1,16E-01 | 7,33E-01 | 9,23E-01 | Gm15547  | 0,91 | No |
| ENSMUSG00000082266 | -1,98E-02 | -3,033655952 | 2,83E-11 | 1,00E+00 | 1,00E+00 | Gm12303  | 0,99 | No |
| ENSMUSG00000082272 | -3,49E-02 | 4,703711961  | 2,01E-01 | 6,54E-01 | 8,78E-01 | Gm11675  | 0,98 | No |
| ENSMUSG00000082274 | 8,34E-02  | 5,575857493  | 1,48E+00 | 2,24E-01 | 5,50E-01 | Gm14026  | 1,06 | No |
| ENSMUSG00000082279 | 1,40E-01  | 3,812494142  | 2,24E+00 | 1,34E-01 | 4,61E-01 | Gm12870  | 1,10 | No |
| ENSMUSG00000082280 | -8,23E-01 | -2,6550782   | 3,73E-01 | 5,41E-01 | 8,11E-01 | Gm5847   | 0,57 | No |
| ENSMUSG00000082283 | 1,04E+00  | -2,448755946 | 1,39E+00 | 2,39E-01 | 5,50E-01 | Gm14472  | 2,06 | No |
| ENSMUSG00000082286 | -1,08E-01 | 4,630028035  | 1,91E+00 | 1,67E-01 | 5,19E-01 | Pisd-ps1 | 0,93 | No |
| ENSMUSG00000082287 | -3,85E+00 | -2,655111218 | 7,09E+00 | 7,75E-03 | 7,71E-02 | Gm15333  | 0,07 | No |
| ENSMUSG00000082289 | -2,14E-01 | 1,916408111  | 1,98E+00 | 1,60E-01 | 5,07E-01 | Gm15596  | 0,86 | No |
| ENSMUSG00000082292 | -8,33E-02 | 2,607198844  | 4,65E-01 | 4,95E-01 | 7,81E-01 | Gm12250  | 0,94 | No |
| ENSMUSG00000082296 | -2,71E+00 | -3,033620915 | 2,92E+00 | 8,75E-02 | 3,78E-01 | Gm11450  | 0,15 | No |
| ENSMUSG00000082304 | -1,92E+00 | -2,963214917 | 1,46E+00 | 2,27E-01 | 5,50E-01 | Gm11198  | 0,26 | No |

|                    |           |              |           |          |          |         |      |    |
|--------------------|-----------|--------------|-----------|----------|----------|---------|------|----|
| ENSMUSG00000082305 | 7,74E-01  | -0,832177706 | 3,88E+00  | 4,89E-02 | 2,66E-01 | Gm2420  | 1,71 | No |
| ENSMUSG00000082307 | 2,74E-02  | -3,033621357 | 9,16E-12  | 1,00E+00 | 1,00E+00 | Gm13418 | 1,02 | No |
| ENSMUSG00000082308 | 8,70E-02  | 3,991839294  | 9,50E-01  | 3,30E-01 | 6,30E-01 | Gm15770 | 1,06 | No |
| ENSMUSG00000082309 | -1,89E+00 | -3,1076441   | 1,42E+00  | 2,33E-01 | 5,50E-01 | Gm12123 | 0,27 | No |
| ENSMUSG00000082310 | -3,42E-02 | 1,804502826  | 4,51E-02  | 8,32E-01 | 9,78E-01 | Gm12904 | 0,98 | No |
| ENSMUSG00000082313 | -1,89E+00 | -3,033648118 | 1,42E+00  | 2,33E-01 | 5,50E-01 | Gm11701 | 0,27 | No |
| ENSMUSG00000082315 | -1,88E+00 | -2,448711663 | 4,15E+00  | 4,16E-02 | 2,42E-01 | Gm16523 | 0,27 | No |
| ENSMUSG00000082318 | -9,13E-01 | -2,655126213 | 7,28E-01  | 3,93E-01 | 6,94E-01 | Gm14162 | 0,53 | No |
| ENSMUSG00000082320 | 1,81E+00  | -3,10765737  | 1,28E+00  | 2,58E-01 | 5,50E-01 | Gm11877 | 3,49 | No |
| ENSMUSG00000082321 | -8,75E-02 | 5,433068033  | 1,56E+00  | 2,11E-01 | 5,50E-01 | Gm14253 | 0,94 | No |
| ENSMUSG00000082323 | 2,21E+00  | -2,311212661 | 6,50E+00  | 1,08E-02 | 9,87E-02 | Gm15314 | 4,63 | No |
| ENSMUSG00000082328 | 7,19E-02  | -1,088826312 | 2,54E-02  | 8,73E-01 | 1,00E+00 | Gm13921 | 1,05 | No |
| ENSMUSG00000082329 | 1,23E-01  | 3,905942064  | 1,82E+00  | 1,77E-01 | 5,37E-01 | Gm14287 | 1,09 | No |
| ENSMUSG00000082330 | -5,88E-02 | -3,033616507 | 1,62E-03  | 9,68E-01 | 1,00E+00 | Ldha-ps | 0,96 | No |
| ENSMUSG00000082332 | 7,65E-02  | 0,977708415  | 1,22E-01  | 7,27E-01 | 9,19E-01 | Gm13384 | 1,05 | No |
| ENSMUSG00000082334 | -2,37E-01 | 2,187271564  | 2,68E+00  | 1,02E-01 | 3,94E-01 | Gm13244 | 0,85 | No |
| ENSMUSG00000082343 | -1,89E+00 | -3,1076441   | 1,42E+00  | 2,33E-01 | 5,50E-01 | Gm14404 | 0,27 | No |
| ENSMUSG00000082345 | 3,66E-01  | 0,095791135  | 1,36E+00  | 2,43E-01 | 5,50E-01 | Gm13622 | 1,29 | No |
| ENSMUSG00000082348 | -1,96E-01 | 2,302592623  | 2,06E+00  | 1,51E-01 | 4,93E-01 | Gm12807 | 0,87 | No |
| ENSMUSG00000082357 | 7,09E-01  | -1,896168182 | 1,36E+00  | 2,44E-01 | 5,50E-01 | Gm13542 | 1,63 | No |
| ENSMUSG00000082361 | -5,21E-01 | -2,146091118 | 4,35E-01  | 5,10E-01 | 7,93E-01 | Btc     | 0,70 | No |
| ENSMUSG00000082364 | -9,00E-01 | -1,355553706 | 3,01E+00  | 8,27E-02 | 3,70E-01 | Gm11955 | 0,54 | No |
| ENSMUSG00000082365 | 8,90E-02  | -1,311160678 | 3,52E-02  | 8,51E-01 | 9,90E-01 | Gm15754 | 1,06 | No |
| ENSMUSG00000082367 | -2,69E+00 | -2,831970912 | 2,88E+00  | 8,99E-02 | 3,80E-01 | Gm12363 | 0,15 | No |
| ENSMUSG00000082368 | 2,65E-01  | 1,334128733  | 2,06E+00  | 1,51E-01 | 4,93E-01 | Gm11225 | 1,20 | No |
| ENSMUSG00000082369 | -3,20E+00 | -2,963227503 | 4,31E+00  | 3,79E-02 | 2,31E-01 | Gm14208 | 0,11 | No |
| ENSMUSG00000082373 | -6,43E-02 | -2,83202899  | 2,81E-03  | 9,58E-01 | 1,00E+00 | Gm13754 | 0,96 | No |
| ENSMUSG00000082374 | 3,14E-02  | -3,107617333 | -7,69E-10 | 1,00E+00 | 1,00E+00 | Gm12741 | 1,02 | No |
| ENSMUSG00000082377 | 1,87E+00  | -3,033632735 | 1,36E+00  | 2,43E-01 | 5,50E-01 | Gm14415 | 3,66 | No |
| ENSMUSG00000082379 | -7,44E-02 | -1,424848714 | 1,94E-02  | 8,89E-01 | 1,00E+00 | Gm13884 | 0,95 | No |
| ENSMUSG00000082380 | 1,56E-01  | -0,683037006 | 1,54E-01  | 6,95E-01 | 9,02E-01 | Gm12218 | 1,11 | No |
| ENSMUSG00000082381 | 1,12E-01  | 2,754853064  | 8,79E-01  | 3,48E-01 | 6,50E-01 | Gm12928 | 1,08 | No |

|                    |           |              |          |          |          |           |      |    |
|--------------------|-----------|--------------|----------|----------|----------|-----------|------|----|
| ENSMUSG00000082389 | 9,40E-02  | 3,891976358  | 1,06E+00 | 3,02E-01 | 5,99E-01 | Mkrn1-ps1 | 1,07 | No |
| ENSMUSG00000082390 | 1,87E+00  | -3,107639691 | 1,38E+00 | 2,40E-01 | 5,50E-01 | Gm12136   | 3,67 | No |
| ENSMUSG00000082394 | -6,53E-02 | 5,050270634  | 7,89E-01 | 3,74E-01 | 6,75E-01 | Gm4596    | 0,96 | No |
| ENSMUSG00000082395 | 3,78E-01  | -1,355658437 | 5,79E-01 | 4,47E-01 | 7,37E-01 | Gm15480   | 1,30 | No |
| ENSMUSG00000082396 | -1,01E+00 | -2,268017351 | 1,56E+00 | 2,11E-01 | 5,50E-01 | Zfp389    | 0,50 | No |
| ENSMUSG00000082399 | -1,68E-01 | 4,554799145  | 4,45E+00 | 3,50E-02 | 2,21E-01 | Gm14036   | 0,89 | No |
| ENSMUSG00000082402 | -7,63E-01 | -1,9631302   | 1,19E+00 | 2,76E-01 | 5,73E-01 | Gm15621   | 0,59 | No |
| ENSMUSG00000082405 | 2,61E+00  | -3,033672762 | 2,63E+00 | 1,05E-01 | 3,97E-01 | Gm16021   | 6,10 | No |
| ENSMUSG00000082408 | -1,72E+00 | -2,832001194 | 2,06E+00 | 1,51E-01 | 4,92E-01 | Gm13545   | 0,30 | No |
| ENSMUSG00000082413 | -2,71E+00 | -2,896132076 | 2,92E+00 | 8,76E-02 | 3,78E-01 | Gm13401   | 0,15 | No |
| ENSMUSG00000082415 | 3,10E-01  | 0,111952151  | 1,25E+00 | 2,63E-01 | 5,57E-01 | Gm12486   | 1,24 | No |
| ENSMUSG00000082417 | -1,99E-01 | -0,093219528 | 4,41E-01 | 5,07E-01 | 7,91E-01 | Gm13740   | 0,87 | No |
| ENSMUSG00000082418 | -8,21E-01 | -2,448681178 | 9,83E-01 | 3,21E-01 | 6,22E-01 | Gm13126   | 0,57 | No |
| ENSMUSG00000082419 | -2,98E-02 | 4,267757926  | 1,26E-01 | 7,23E-01 | 9,17E-01 | Gm11425   | 0,98 | No |
| ENSMUSG00000082420 | -1,67E-02 | 5,817375748  | 6,22E-02 | 8,03E-01 | 9,62E-01 | Gm6517    | 0,99 | No |
| ENSMUSG00000082424 | 1,43E-01  | 6,171641182  | 4,94E+00 | 2,62E-02 | 1,81E-01 | Gm13292   | 1,10 | No |
| ENSMUSG00000082429 | -7,50E-02 | -2,548225897 | 5,11E-03 | 9,43E-01 | 1,00E+00 | Gm13171   | 0,95 | No |
| ENSMUSG00000082431 | -1,85E-02 | 6,239114379  | 8,35E-02 | 7,73E-01 | 9,44E-01 | Tdpx-ps1  | 0,99 | No |
| ENSMUSG00000082433 | 1,27E-01  | 7,347949205  | 4,51E+00 | 3,37E-02 | 2,16E-01 | Gm9025    | 1,09 | No |
| ENSMUSG00000082436 | 1,75E-01  | 0,316816588  | 4,18E-01 | 5,18E-01 | 7,98E-01 | Gm11688   | 1,13 | No |
| ENSMUSG00000082453 | 2,61E-01  | -0,136113092 | 6,90E-01 | 4,06E-01 | 7,03E-01 | Gm11502   | 1,20 | No |
| ENSMUSG00000082454 | -1,28E-01 | 9,281650536  | 5,12E+00 | 2,36E-02 | 1,69E-01 | Gm12183   | 0,91 | No |
| ENSMUSG00000082455 | 1,79E+00  | -2,832057733 | 1,29E+00 | 2,55E-01 | 5,50E-01 | Gm13665   | 3,47 | No |
| ENSMUSG00000082456 | -1,45E-01 | 3,121053831  | 1,74E+00 | 1,87E-01 | 5,50E-01 | Gm11598   | 0,90 | No |
| ENSMUSG00000082457 | -5,16E-01 | -1,497540796 | 8,62E-01 | 3,53E-01 | 6,54E-01 | Gm13776   | 0,70 | No |
| ENSMUSG00000082460 | -1,94E+00 | -3,107619243 | 1,50E+00 | 2,21E-01 | 5,50E-01 | Gm13685   | 0,26 | No |
| ENSMUSG00000082463 | -7,80E-02 | -2,14607765  | 1,13E-02 | 9,15E-01 | 1,00E+00 | Gm15765   | 0,95 | No |
| ENSMUSG00000082465 | -1,33E-01 | 5,076237882  | 3,29E+00 | 6,97E-02 | 3,33E-01 | Rps6-ps3  | 0,91 | No |
| ENSMUSG00000082473 | 2,56E-02  | -1,497580721 | 2,37E-03 | 9,61E-01 | 1,00E+00 | Kif22-ps  | 1,02 | No |
| ENSMUSG00000082474 | 1,66E-01  | 3,064823002  | 2,30E+00 | 1,29E-01 | 4,51E-01 | Gm8213    | 1,12 | No |
| ENSMUSG00000082475 | -8,61E-02 | 5,70984155   | 1,63E+00 | 2,02E-01 | 5,50E-01 | Gm7206    | 0,94 | No |
| ENSMUSG00000082476 | 5,31E-01  | -1,655130363 | 1,00E+00 | 3,17E-01 | 6,18E-01 | Gm12242   | 1,44 | No |

|                    |           |              |           |          |          |            |      |     |
|--------------------|-----------|--------------|-----------|----------|----------|------------|------|-----|
| ENSMUSG00000082478 | 1,81E+00  | -3,10765737  | 1,28E+00  | 2,58E-01 | 5,50E-01 | Gm11619    | 3,49 | No  |
| ENSMUSG00000082480 | 4,25E-02  | 3,681847152  | 1,96E-01  | 6,58E-01 | 8,81E-01 | Gm11687    | 1,03 | No  |
| ENSMUSG00000082481 | -8,85E-01 | -1,18552592  | 3,36E+00  | 6,67E-02 | 3,25E-01 | Rps12-ps19 | 0,54 | No  |
| ENSMUSG00000082483 | -2,71E+00 | -3,033620915 | 2,92E+00  | 8,75E-02 | 3,78E-01 | Gm13486    | 0,15 | No  |
| ENSMUSG00000082484 | -7,86E-01 | -1,165392401 | 2,39E+00  | 1,22E-01 | 4,36E-01 | Gm16177    | 0,58 | No  |
| ENSMUSG00000082487 | -1,28E-01 | 1,419540164  | 4,80E-01  | 4,88E-01 | 7,75E-01 | Gm11628    | 0,92 | No  |
| ENSMUSG00000082491 | -9,53E-02 | 4,932931415  | 1,64E+00  | 2,01E-01 | 5,50E-01 | Gm5909     | 0,94 | No  |
| ENSMUSG00000082498 | -4,35E-01 | -2,655141366 | 1,94E-01  | 6,60E-01 | 8,82E-01 | Gm12937    | 0,74 | No  |
| ENSMUSG00000082503 | -4,00E-01 | -2,185632134 | 3,33E-01  | 5,64E-01 | 8,26E-01 | Gm12229    | 0,76 | No  |
| ENSMUSG00000082507 | 7,35E-01  | -1,655154947 | 1,64E+00  | 2,01E-01 | 5,50E-01 | Gm9378     | 1,66 | No  |
| ENSMUSG00000082510 | -3,88E-02 | 1,621650643  | 5,24E-02  | 8,19E-01 | 9,71E-01 | Gm11793    | 0,97 | No  |
| ENSMUSG00000082512 | -2,43E-01 | -0,600694665 | 4,54E-01  | 5,01E-01 | 7,86E-01 | Gm13937    | 0,84 | No  |
| ENSMUSG00000082513 | -3,86E+00 | -2,401360343 | 7,13E+00  | 7,60E-03 | 7,62E-02 | Gm15374    | 0,07 | No  |
| ENSMUSG00000082514 | 1,16E-01  | -0,998107965 | 7,42E-02  | 7,85E-01 | 9,52E-01 | Gm11452    | 1,08 | No  |
| ENSMUSG00000082515 | 5,86E-02  | 0,533139636  | 5,94E-02  | 8,07E-01 | 9,64E-01 | Gm12902    | 1,04 | No  |
| ENSMUSG00000082516 | -2,17E-02 | 3,963472118  | 5,88E-02  | 8,08E-01 | 9,65E-01 | Gm13342    | 0,99 | No  |
| ENSMUSG00000082519 | -1,44E-01 | 1,814778873  | 8,17E-01  | 3,66E-01 | 6,67E-01 | Vamp7-ps   | 0,90 | No  |
| ENSMUSG00000082520 | 3,25E-01  | -2,548215269 | 1,08E-01  | 7,43E-01 | 9,28E-01 | Gm13349    | 1,25 | No  |
| ENSMUSG00000082529 | 9,01E-03  | -3,107646452 | -5,16E-10 | 1,00E+00 | 1,00E+00 | Gm11199    | 1,01 | No  |
| ENSMUSG00000082530 | -1,22E-02 | 3,230471019  | 1,31E-02  | 9,09E-01 | 1,00E+00 | Gm12168    | 0,99 | No  |
| ENSMUSG00000082532 | -9,74E-01 | -2,448704144 | 1,15E+00  | 2,84E-01 | 5,81E-01 | Rpl31-ps6  | 0,51 | No  |
| ENSMUSG00000082534 | 8,56E-02  | 3,266387619  | 6,52E-01  | 4,19E-01 | 7,15E-01 | Gm13712    | 1,06 | No  |
| ENSMUSG00000082535 | 2,74E-02  | 0,508571554  | 1,27E-02  | 9,10E-01 | 1,00E+00 | Gm7860     | 1,02 | No  |
| ENSMUSG00000082536 | -2,02E-01 | 10,90880622  | 1,31E+01  | 2,95E-04 | 5,98E-03 | Gm13456    | 0,87 | Yes |
| ENSMUSG00000082543 | -7,65E-02 | -1,246983359 | 2,33E-02  | 8,79E-01 | 1,00E+00 | Gm14336    | 0,95 | No  |
| ENSMUSG00000082548 | 9,01E-03  | -3,107646452 | -5,16E-10 | 1,00E+00 | 1,00E+00 | Gm12377    | 1,01 | No  |
| ENSMUSG00000082550 | 1,00E+00  | -0,726314483 | 5,34E+00  | 2,09E-02 | 1,55E-01 | Gm12344    | 2,00 | No  |
| ENSMUSG00000082554 | 2,05E-01  | 0,966549629  | 8,99E-01  | 3,43E-01 | 6,43E-01 | Gm15806    | 1,15 | No  |
| ENSMUSG00000082561 | -4,20E-01 | -2,929320178 | 1,09E-01  | 7,41E-01 | 9,27E-01 | Gm15580    | 0,75 | No  |
| ENSMUSG00000082566 | 1,47E-01  | -1,070181601 | 1,04E-01  | 7,47E-01 | 9,30E-01 | Gm11485    | 1,11 | No  |
| ENSMUSG00000082570 | 4,74E-01  | -2,600680117 | 1,75E-01  | 6,76E-01 | 8,91E-01 | Gm15711    | 1,39 | No  |
| ENSMUSG00000082575 | -1,51E-01 | 8,690485185  | 7,00E+00  | 8,16E-03 | 8,02E-02 | Gm13050    | 0,90 | No  |

|                    |           |              |           |          |          |           |  |      |     |
|--------------------|-----------|--------------|-----------|----------|----------|-----------|--|------|-----|
| ENSMUSG00000082576 | 3,46E-01  | -1,448754033 | 4,15E-01  | 5,19E-01 | 7,98E-01 | Gm12058   |  | 1,27 | No  |
| ENSMUSG00000082579 | -1,69E+00 | -2,655102197 | 1,97E+00  | 1,60E-01 | 5,08E-01 | Gm11979   |  | 0,31 | No  |
| ENSMUSG00000082580 | -3,73E-01 | -0,448901827 | 1,29E+00  | 2,57E-01 | 5,50E-01 | Gm13182   |  | 0,77 | No  |
| ENSMUSG00000082585 | -4,10E-02 | 5,598761557  | 3,59E-01  | 5,49E-01 | 8,16E-01 | Gm15387   |  | 0,97 | No  |
| ENSMUSG00000082587 | 1,86E+00  | -3,033661846 | 1,35E+00  | 2,46E-01 | 5,50E-01 | Gm12129   |  | 3,62 | No  |
| ENSMUSG00000082588 | -8,00E-02 | 1,432104632  | 2,05E-01  | 6,51E-01 | 8,76E-01 | Gm15443   |  | 0,95 | No  |
| ENSMUSG00000082592 | -1,87E+00 | -3,107637761 | 1,39E+00  | 2,38E-01 | 5,50E-01 | Gm12950   |  | 0,27 | No  |
| ENSMUSG00000082593 | -2,68E+00 | -2,896144247 | 2,85E+00  | 9,15E-02 | 3,82E-01 | Gm11331   |  | 0,16 | No  |
| ENSMUSG00000082596 | -3,00E-01 | 0,066628925  | 9,57E-01  | 3,28E-01 | 6,29E-01 | Gm14227   |  | 0,81 | No  |
| ENSMUSG00000082599 | -3,58E+00 | -2,770569053 | 5,77E+00  | 1,63E-02 | 1,33E-01 | Gm13141   |  | 0,08 | No  |
| ENSMUSG00000082601 | -6,42E-02 | -1,548019534 | 1,45E-02  | 9,04E-01 | 1,00E+00 | Gm12700   |  | 0,96 | No  |
| ENSMUSG00000082604 | -1,89E-01 | -0,56103219  | 2,52E-01  | 6,16E-01 | 8,54E-01 | Gm8482    |  | 0,88 | No  |
| ENSMUSG00000082605 | -5,19E-01 | -0,71885227  | 1,75E+00  | 1,85E-01 | 5,49E-01 | Gm16148   |  | 0,70 | No  |
| ENSMUSG00000082607 | 2,46E-01  | 0,49010036   | 1,01E+00  | 3,16E-01 | 6,16E-01 | Gm12045   |  | 1,19 | No  |
| ENSMUSG00000082609 | -5,81E-01 | 2,323734568  | 1,86E+01  | 1,59E-05 | 5,05E-04 | Gm15464   |  | 0,67 | Yes |
| ENSMUSG00000082610 | 4,59E-01  | -2,711755758 | 1,64E-01  | 6,85E-01 | 8,97E-01 | Gm13829   |  | 1,37 | No  |
| ENSMUSG00000082615 | -3,83E-02 | -3,107651936 | -7,91E-11 | 1,00E+00 | 1,00E+00 | Gm13239   |  | 0,97 | No  |
| ENSMUSG00000082623 | -1,59E-02 | -0,09818775  | 2,75E-03  | 9,58E-01 | 1,00E+00 | Gm15493   |  | 0,99 | No  |
| ENSMUSG00000082626 | -4,38E-02 | 3,71264003   | 2,17E-01  | 6,42E-01 | 8,71E-01 | Rps13-ps5 |  | 0,97 | No  |
| ENSMUSG00000082632 | -8,77E-01 | -0,755640585 | 4,25E+00  | 3,92E-02 | 2,35E-01 | Gm13365   |  | 0,54 | No  |
| ENSMUSG00000082633 | 2,62E+00  | -3,033654625 | 2,66E+00  | 1,03E-01 | 3,95E-01 | Gm15779   |  | 6,16 | No  |
| ENSMUSG00000082641 | -7,83E-02 | -2,832047505 | 4,20E-03  | 9,48E-01 | 1,00E+00 | Rpl30-ps5 |  | 0,95 | No  |
| ENSMUSG00000082645 | 5,79E-02  | -2,289547055 | 5,24E-03  | 9,42E-01 | 1,00E+00 | Gm15481   |  | 1,04 | No  |
| ENSMUSG00000082646 | 2,65E+00  | -3,033655087 | 2,73E+00  | 9,86E-02 | 3,91E-01 | Gm12732   |  | 6,30 | No  |
| ENSMUSG00000082647 | -6,19E-01 | -2,226239746 | 7,44E-01  | 3,88E-01 | 6,89E-01 | Gm14056   |  | 0,65 | No  |
| ENSMUSG00000082650 | 1,85E-01  | -0,497728773 | 2,78E-01  | 5,98E-01 | 8,45E-01 | Gm15358   |  | 1,14 | No  |
| ENSMUSG00000082651 | -1,36E+00 | -2,83195595  | 1,17E+00  | 2,80E-01 | 5,77E-01 | Gm14001   |  | 0,39 | No  |
| ENSMUSG00000082653 | -2,88E-02 | -2,963268425 | 3,79E-04  | 9,84E-01 | 1,00E+00 | Gm15897   |  | 0,98 | No  |
| ENSMUSG00000082658 | 2,61E+00  | -3,033672762 | 2,63E+00  | 1,05E-01 | 3,97E-01 | Fau-ps2   |  | 6,10 | No  |
| ENSMUSG00000082662 | -3,57E-01 | 4,181764398  | 1,77E+01  | 2,62E-05 | 7,81E-04 | Gm15516   |  | 0,78 | Yes |
| ENSMUSG00000082663 | 7,43E-01  | -2,963261206 | 3,01E-01  | 5,83E-01 | 8,38E-01 | Trav13-3  |  | 1,67 | No  |
| ENSMUSG00000082665 | 1,19E-01  | 2,72303677   | 9,54E-01  | 3,29E-01 | 6,29E-01 | Gm11470   |  | 1,09 | No  |

|                    |           |              |           |          |          |               |      |    |
|--------------------|-----------|--------------|-----------|----------|----------|---------------|------|----|
| ENSMUSG00000082674 | 1,15E-01  | 2,151925228  | 6,22E-01  | 4,30E-01 | 7,24E-01 | Gm11914       | 1,08 | No |
| ENSMUSG00000082676 | 4,24E-02  | -3,033592245 | -1,17E-09 | 1,00E+00 | 1,00E+00 | Gm11843       | 1,03 | No |
| ENSMUSG00000082677 | -8,11E-01 | -2,600594638 | 3,64E-01  | 5,46E-01 | 8,14E-01 | Gm15371       | 0,57 | No |
| ENSMUSG00000082678 | -9,80E-02 | 2,585780179  | 5,95E-01  | 4,40E-01 | 7,32E-01 | Gm12818       | 0,93 | No |
| ENSMUSG00000082682 | 8,40E-01  | -2,711767974 | 6,14E-01  | 4,33E-01 | 7,27E-01 | Gm15349       | 1,79 | No |
| ENSMUSG00000082684 | 4,26E-01  | -2,65517552  | 1,42E-01  | 7,06E-01 | 9,08E-01 | Gm12774       | 1,34 | No |
| ENSMUSG00000082686 | -3,82E-01 | -0,321975403 | 9,50E-01  | 3,30E-01 | 6,30E-01 | Gm12961       | 0,77 | No |
| ENSMUSG00000082687 | 2,65E+00  | -3,033655087 | 2,73E+00  | 9,86E-02 | 3,91E-01 | Gm11474       | 6,30 | No |
| ENSMUSG00000082688 | -1,67E-02 | -2,963250293 | 1,29E-04  | 9,91E-01 | 1,00E+00 | Gm12124       | 0,99 | No |
| ENSMUSG00000082691 | 1,07E-01  | 5,922394392  | 2,59E+00  | 1,08E-01 | 4,02E-01 | Dynlt1-ps1    | 1,08 | No |
| ENSMUSG00000082692 | 1,81E+00  | -3,10765737  | 1,28E+00  | 2,58E-01 | 5,50E-01 | H2af-ps       | 3,49 | No |
| ENSMUSG00000082704 | -1,72E+00 | -2,770555969 | 2,06E+00  | 1,51E-01 | 4,93E-01 | Gm12515       | 0,30 | No |
| ENSMUSG00000082705 | -1,22E-01 | 2,584385735  | 9,51E-01  | 3,29E-01 | 6,30E-01 | Gm15616       | 0,92 | No |
| ENSMUSG00000082706 | 3,54E-01  | 0,470986197  | 1,92E+00  | 1,65E-01 | 5,18E-01 | Gm11663       | 1,28 | No |
| ENSMUSG00000082709 | 2,46E-01  | 0,581126247  | 1,02E+00  | 3,13E-01 | 6,12E-01 | Gm12362       | 1,19 | No |
| ENSMUSG00000082711 | -5,58E-01 | -2,448601375 | 2,45E-01  | 6,21E-01 | 8,57E-01 | Gm12987       | 0,68 | No |
| ENSMUSG00000082715 | -1,07E-01 | 5,496159444  | 2,40E+00  | 1,22E-01 | 4,35E-01 | Gm11633       | 0,93 | No |
| ENSMUSG00000082716 | 7,24E-01  | -2,896104002 | 2,86E-01  | 5,93E-01 | 8,42E-01 | Rpl31-ps5     | 1,65 | No |
| ENSMUSG00000082721 | -4,08E-02 | -2,963255775 | 7,59E-04  | 9,78E-01 | 1,00E+00 | Gm12087       | 0,97 | No |
| ENSMUSG00000082724 | 1,09E-01  | -0,567624986 | 8,93E-02  | 7,65E-01 | 9,40E-01 | Gm14416       | 1,08 | No |
| ENSMUSG00000082726 | -7,38E-02 | -3,033634644 | 2,66E-03  | 9,59E-01 | 1,00E+00 | Gm11424       | 0,95 | No |
| ENSMUSG00000082727 | 4,93E-01  | -1,289545274 | 8,92E-01  | 3,45E-01 | 6,46E-01 | Gm13260       | 1,41 | No |
| ENSMUSG00000082737 | 4,92E-01  | -1,711620155 | 6,09E-01  | 4,35E-01 | 7,28E-01 | Gm12026       | 1,41 | No |
| ENSMUSG00000082738 | 4,94E-02  | 0,451776738  | 3,94E-02  | 8,43E-01 | 9,85E-01 | Gm15422       | 1,03 | No |
| ENSMUSG00000082740 | -3,89E-01 | 2,167989774  | 7,72E+00  | 5,47E-03 | 5,97E-02 | Gm14127       | 0,76 | No |
| ENSMUSG00000082741 | -3,76E-01 | 1,619071494  | 5,10E+00  | 2,40E-02 | 1,70E-01 | Gm9703        | 0,77 | No |
| ENSMUSG00000082743 | -1,52E-01 | 3,295881905  | 2,11E+00  | 1,46E-01 | 4,85E-01 | Gm12988       | 0,90 | No |
| ENSMUSG00000082744 | 2,55E+00  | -2,378334268 | 5,87E+00  | 1,54E-02 | 1,28E-01 | Gm15625       | 5,87 | No |
| ENSMUSG00000082760 | 1,18E-01  | 0,948254824  | 3,06E-01  | 5,80E-01 | 8,37E-01 | Gm15546       | 1,09 | No |
| ENSMUSG00000082762 | -3,00E-02 | 6,355797916  | 2,22E-01  | 6,38E-01 | 8,68E-01 | Gm12366       | 0,98 | No |
| ENSMUSG00000082765 | -1,22E+00 | -2,998024514 | 7,09E-01  | 4,00E-01 | 6,99E-01 | Gm14411       | 0,43 | No |
| ENSMUSG00000082766 | 7,36E-01  | -2,89615794  | 2,95E-01  | 5,87E-01 | 8,40E-01 | 1700064H15Rik | 1,67 | No |



|                    |           |              |          |          |          |           |      |    |
|--------------------|-----------|--------------|----------|----------|----------|-----------|------|----|
| ENSMUSG00000082768 | -1,02E-01 | -0,060905855 | 1,06E-01 | 7,44E-01 | 9,29E-01 | Gm12727   | 0,93 | No |
| ENSMUSG00000082769 | 5,42E-03  | 3,651140693  | 3,18E-03 | 9,55E-01 | 1,00E+00 | Gm15793   | 1,00 | No |
| ENSMUSG00000082774 | -7,30E-01 | -2,448635376 | 5,97E-01 | 4,40E-01 | 7,32E-01 | Gm8805    | 0,60 | No |
| ENSMUSG00000082779 | -1,32E-01 | 0,244677883  | 2,32E-01 | 6,30E-01 | 8,63E-01 | Gm13162   | 0,91 | No |
| ENSMUSG00000082782 | -1,17E-01 | 2,530525444  | 8,46E-01 | 3,58E-01 | 6,59E-01 | Gm5319    | 0,92 | No |
| ENSMUSG00000082789 | 1,36E-01  | -2,185681434 | 3,22E-02 | 8,58E-01 | 9,94E-01 | Gm13284   | 1,10 | No |
| ENSMUSG00000082791 | -4,13E-02 | 5,703826988  | 3,74E-01 | 5,41E-01 | 8,11E-01 | Gm4875    | 0,97 | No |
| ENSMUSG00000082792 | 5,78E-01  | -2,03355424  | 7,60E-01 | 3,83E-01 | 6,85E-01 | Gm12176   | 1,49 | No |
| ENSMUSG00000082796 | 8,57E-01  | -2,401419972 | 8,83E-01 | 3,47E-01 | 6,48E-01 | Gm13385   | 1,81 | No |
| ENSMUSG00000082804 | -1,94E+00 | -3,107619243 | 1,50E+00 | 2,21E-01 | 5,50E-01 | Rpl17-ps1 | 0,26 | No |
| ENSMUSG00000082806 | 1,13E+00  | -1,600746999 | 2,58E+00 | 1,08E-01 | 4,03E-01 | Rpl13-ps1 | 2,18 | No |
| ENSMUSG00000082809 | 1,06E-01  | 7,968489048  | 3,33E+00 | 6,82E-02 | 3,29E-01 | Gm14150   | 1,08 | No |
| ENSMUSG00000082816 | -1,88E-02 | -0,998039547 | 1,94E-03 | 9,65E-01 | 1,00E+00 | Gm11953   | 0,99 | No |
| ENSMUSG00000082820 | -6,18E-02 | 2,577683496  | 2,43E-01 | 6,22E-01 | 8,58E-01 | Gm13803   | 0,96 | No |
| ENSMUSG00000082826 | 3,65E-01  | 1,73158112   | 4,65E+00 | 3,11E-02 | 2,03E-01 | Mif-ps3   | 1,29 | No |
| ENSMUSG00000082828 | 6,36E-02  | -0,995133339 | 2,29E-02 | 8,80E-01 | 1,00E+00 | Gm16106   | 1,05 | No |
| ENSMUSG00000082836 | 5,36E-02  | 2,740046248  | 1,94E-01 | 6,60E-01 | 8,82E-01 | Gm13612   | 1,04 | No |
| ENSMUSG00000082837 | -3,57E-01 | -2,401428949 | 1,60E-01 | 6,89E-01 | 8,99E-01 | Gm15373   | 0,78 | No |
| ENSMUSG00000082844 | -4,27E-01 | -1,574018299 | 5,29E-01 | 4,67E-01 | 7,55E-01 | Gm13537   | 0,74 | No |
| ENSMUSG00000082848 | -4,17E-02 | 0,3333094    | 2,52E-02 | 8,74E-01 | 1,00E+00 | Gm16066   | 0,97 | No |
| ENSMUSG00000082852 | -9,20E-01 | -2,770574044 | 7,38E-01 | 3,90E-01 | 6,91E-01 | Gm12021   | 0,53 | No |
| ENSMUSG00000082860 | 1,23E-01  | 0,641352698  | 2,89E-01 | 5,91E-01 | 8,41E-01 | Gm13204   | 1,09 | No |
| ENSMUSG00000082861 | -1,63E-01 | -0,58730202  | 2,16E-01 | 6,42E-01 | 8,71E-01 | Gm11362   | 0,89 | No |
| ENSMUSG00000082864 | -3,23E+00 | -2,832003132 | 4,38E+00 | 3,64E-02 | 2,27E-01 | Gm13358   | 0,11 | No |
| ENSMUSG00000082867 | -1,32E+00 | -2,831981163 | 1,08E+00 | 2,98E-01 | 5,94E-01 | Gm15730   | 0,40 | No |
| ENSMUSG00000082870 | 1,87E+00  | -3,107639691 | 1,38E+00 | 2,40E-01 | 5,50E-01 | Gm12165   | 3,67 | No |
| ENSMUSG00000082872 | 1,09E-01  | 3,326833302  | 1,08E+00 | 2,98E-01 | 5,94E-01 | Gm15773   | 1,08 | No |
| ENSMUSG00000082875 | -6,93E-01 | -0,831978725 | 3,18E+00 | 7,44E-02 | 3,47E-01 | Gm12598   | 0,62 | No |
| ENSMUSG00000082876 | -2,14E-02 | 5,380964522  | 9,25E-02 | 7,61E-01 | 9,37E-01 | Gm11889   | 0,99 | No |
| ENSMUSG00000082878 | -2,27E-02 | 2,670810003  | 3,43E-02 | 8,53E-01 | 9,91E-01 | Gm12583   | 0,98 | No |
| ENSMUSG00000082884 | 2,05E-01  | 3,038241508  | 3,45E+00 | 6,34E-02 | 3,14E-01 | Gm13339   | 1,15 | No |
| ENSMUSG00000082888 | -5,89E-02 | -2,497589368 | 3,97E-03 | 9,50E-01 | 1,00E+00 | Gm12934   | 0,96 | No |

|                    |           |              |           |          |          |             |      |     |
|--------------------|-----------|--------------|-----------|----------|----------|-------------|------|-----|
| ENSMUSG00000082895 | -3,94E-01 | 6,329420887  | 3,86E+01  | 5,21E-10 | 4,44E-08 | Rpsa-ps9    | 0,76 | Yes |
| ENSMUSG00000082896 | 2,08E-02  | 5,659314075  | 9,42E-02  | 7,59E-01 | 9,36E-01 | Gm5844      | 1,01 | No  |
| ENSMUSG00000082897 | 3,14E-02  | -3,107617333 | -7,69E-10 | 1,00E+00 | 1,00E+00 | Gm11982     | 1,02 | No  |
| ENSMUSG00000082901 | -1,33E-01 | 3,970648381  | 2,25E+00  | 1,33E-01 | 4,60E-01 | Gm14323     | 0,91 | No  |
| ENSMUSG00000082908 | -5,03E-02 | 4,858312064  | 4,38E-01  | 5,08E-01 | 7,92E-01 | Gm13736     | 0,97 | No  |
| ENSMUSG00000082911 | 1,59E+00  | -2,770633681 | 1,73E+00  | 1,89E-01 | 5,50E-01 | Gm14119     | 3,01 | No  |
| ENSMUSG00000082917 | -1,93E+00 | -2,963274349 | 1,47E+00  | 2,25E-01 | 5,50E-01 | Gm11440     | 0,26 | No  |
| ENSMUSG00000082920 | -2,26E-01 | 3,181782225  | 4,29E+00  | 3,83E-02 | 2,32E-01 | Gm13864     | 0,86 | No  |
| ENSMUSG00000082922 | -2,15E-01 | 0,191276524  | 5,95E-01  | 4,40E-01 | 7,32E-01 | Gm6939      | 0,86 | No  |
| ENSMUSG00000082925 | 8,14E-02  | 4,492335056  | 1,02E+00  | 3,13E-01 | 6,13E-01 | Gm13135     | 1,06 | No  |
| ENSMUSG00000082928 | -5,60E-01 | -1,627546018 | 9,41E-01  | 3,32E-01 | 6,32E-01 | Gm12785     | 0,68 | No  |
| ENSMUSG00000082930 | 3,14E-02  | -3,107617333 | -7,69E-10 | 1,00E+00 | 1,00E+00 | Gm13462     | 1,02 | No  |
| ENSMUSG00000082931 | -1,34E-01 | 1,676466062  | 6,11E-01  | 4,35E-01 | 7,27E-01 | Gm13586     | 0,91 | No  |
| ENSMUSG00000082932 | 9,01E-03  | -3,107646452 | -5,16E-10 | 1,00E+00 | 1,00E+00 | Cyp2j8      | 1,01 | No  |
| ENSMUSG00000082935 | -1,14E-01 | 6,475606248  | 3,33E+00  | 6,82E-02 | 3,29E-01 | Gm7658      | 0,92 | No  |
| ENSMUSG00000082936 | 3,14E-01  | -1,21616445  | 4,72E-01  | 4,92E-01 | 7,78E-01 | Gm16166     | 1,24 | No  |
| ENSMUSG00000082938 | 4,58E-02  | 2,796651362  | 1,49E-01  | 6,99E-01 | 9,04E-01 | Gm2810      | 1,03 | No  |
| ENSMUSG00000082941 | -7,16E-02 | -2,831969669 | 3,50E-03  | 9,53E-01 | 1,00E+00 | Gm12850     | 0,95 | No  |
| ENSMUSG00000082945 | -3,88E+00 | -2,600684939 | 7,19E+00  | 7,31E-03 | 7,41E-02 | Gm11540     | 0,07 | No  |
| ENSMUSG00000082951 | -3,95E-01 | 0,897089114  | 3,25E+00  | 7,14E-02 | 3,38E-01 | Gm13359     | 0,76 | No  |
| ENSMUSG00000082953 | 2,85E-02  | 3,547620033  | 8,25E-02  | 7,74E-01 | 9,44E-01 | Gm13217     | 1,02 | No  |
| ENSMUSG00000082954 | -1,94E+00 | -3,107619243 | 1,50E+00  | 2,21E-01 | 5,50E-01 | Gm15504     | 0,26 | No  |
| ENSMUSG00000082956 | -4,31E-02 | 1,708771826  | 7,21E-02  | 7,88E-01 | 9,53E-01 | Naip3       | 0,97 | No  |
| ENSMUSG00000082957 | 8,40E-02  | 0,187525239  | 9,05E-02  | 7,64E-01 | 9,39E-01 | Gm15303     | 1,06 | No  |
| ENSMUSG00000082962 | -3,23E+00 | -2,770552905 | 4,38E+00  | 3,64E-02 | 2,27E-01 | Gm10601     | 0,11 | No  |
| ENSMUSG00000082969 | 1,87E-01  | -1,574260912 | 9,74E-02  | 7,55E-01 | 9,34E-01 | Gm12630     | 1,14 | No  |
| ENSMUSG00000082971 | 3,51E-01  | 2,181234723  | 5,73E+00  | 1,67E-02 | 1,35E-01 | Gm13517     | 1,28 | No  |
| ENSMUSG00000082978 | -3,91E-01 | 3,654577359  | 1,68E+01  | 4,26E-05 | 1,19E-03 | Rpsa-ps11   | 0,76 | Yes |
| ENSMUSG00000082980 | -3,83E-02 | -3,107651936 | -7,91E-11 | 1,00E+00 | 1,00E+00 | Olfr1274-ps | 0,97 | No  |
| ENSMUSG00000082981 | -5,93E-01 | -1,497719381 | 1,18E+00  | 2,78E-01 | 5,75E-01 | Polr2k-ps   | 0,66 | No  |
| ENSMUSG00000082983 | 1,22E+00  | -3,146114919 | 6,90E-01  | 4,06E-01 | 7,02E-01 | Gm12318     | 2,33 | No  |
| ENSMUSG00000082985 | 4,28E-02  | -1,574193792 | 5,78E-03  | 9,39E-01 | 1,00E+00 | Gm14042     | 1,03 | No  |

|                    |           |              |           |          |          |             |      |     |
|--------------------|-----------|--------------|-----------|----------|----------|-------------|------|-----|
| ENSMUSG00000082987 | 2,61E+00  | -3,033672762 | 2,63E+00  | 1,05E-01 | 3,97E-01 | Rps13-ps6   | 6,10 | No  |
| ENSMUSG00000082988 | 5,44E-02  | 5,202732521  | 5,80E-01  | 4,46E-01 | 7,37E-01 | Gm5903      | 1,04 | No  |
| ENSMUSG00000082990 | 3,29E-01  | 0,12396688   | 1,26E+00  | 2,62E-01 | 5,57E-01 | Gm14052     | 1,26 | No  |
| ENSMUSG00000082998 | -1,00E-01 | 4,52274339   | 1,57E+00  | 2,11E-01 | 5,50E-01 | Gm11221     | 0,93 | No  |
| ENSMUSG00000083004 | -8,22E-01 | -1,548185292 | 2,22E+00  | 1,36E-01 | 4,65E-01 | Gm13413     | 0,57 | No  |
| ENSMUSG00000083006 | 7,41E-01  | -2,37828866  | 6,37E-01  | 4,25E-01 | 7,19E-01 | Gm15715     | 1,67 | No  |
| ENSMUSG00000083007 | -3,30E-01 | 0,136438319  | 1,29E+00  | 2,56E-01 | 5,50E-01 | Gm13623     | 0,80 | No  |
| ENSMUSG00000083008 | 1,59E+00  | -2,770669833 | 1,73E+00  | 1,89E-01 | 5,50E-01 | Gm12053     | 3,01 | No  |
| ENSMUSG00000083009 | 1,81E+00  | -3,10765737  | 1,28E+00  | 2,58E-01 | 5,50E-01 | Gm1335      | 3,49 | No  |
| ENSMUSG00000083011 | -1,06E-01 | 4,350684385  | 1,64E+00  | 2,00E-01 | 5,50E-01 | Gm12816     | 0,93 | No  |
| ENSMUSG00000083012 | 1,29E-01  | 4,14956651   | 2,20E+00  | 1,38E-01 | 4,68E-01 | Fam220a     | 1,09 | No  |
| ENSMUSG00000083013 | -2,39E-02 | 2,257249171  | 2,87E-02  | 8,65E-01 | 9,98E-01 | Gm12978     | 0,98 | No  |
| ENSMUSG00000083014 | 1,36E+00  | -2,311229105 | 1,88E+00  | 1,70E-01 | 5,26E-01 | Gm11764     | 2,56 | No  |
| ENSMUSG00000083016 | 1,87E+00  | -3,107639691 | 1,38E+00  | 2,40E-01 | 5,50E-01 | Gm12618     | 3,67 | No  |
| ENSMUSG00000083017 | -1,46E+00 | -2,600669928 | 2,21E+00  | 1,37E-01 | 4,66E-01 | Gm12163     | 0,36 | No  |
| ENSMUSG00000083020 | -3,83E-02 | -3,107651936 | -7,91E-11 | 1,00E+00 | 1,00E+00 | Gm15331     | 0,97 | No  |
| ENSMUSG00000083022 | -2,72E-01 | 6,10413108   | 1,77E+01  | 2,60E-05 | 7,78E-04 | Rps15a-ps6  | 0,83 | Yes |
| ENSMUSG00000083027 | 2,81E-02  | 3,371197051  | 7,36E-02  | 7,86E-01 | 9,52E-01 | Gm13140     | 1,02 | No  |
| ENSMUSG00000083034 | -5,88E-02 | -3,033616507 | 1,62E-03  | 9,68E-01 | 1,00E+00 | Olfr334-ps1 | 0,96 | No  |
| ENSMUSG00000083036 | -7,39E-02 | -2,205804766 | 9,49E-03  | 9,22E-01 | 1,00E+00 | Gm15959     | 0,95 | No  |
| ENSMUSG00000083038 | -2,10E-01 | 3,057239901  | 3,66E+00  | 5,59E-02 | 2,90E-01 | Gm13233     | 0,86 | No  |
| ENSMUSG00000083041 | -7,83E-02 | 5,436685202  | 1,26E+00  | 2,62E-01 | 5,56E-01 | Gmfg-ps     | 0,95 | No  |
| ENSMUSG00000083043 | -2,36E-01 | 3,108863459  | 4,58E+00  | 3,24E-02 | 2,10E-01 | Gm13433     | 0,85 | No  |
| ENSMUSG00000083044 | 6,16E-02  | 1,928231991  | 1,63E-01  | 6,86E-01 | 8,97E-01 | Gm12416     | 1,04 | No  |
| ENSMUSG00000083045 | -1,26E+00 | -2,711724243 | 1,52E+00  | 2,17E-01 | 5,50E-01 | Gm16100     | 0,42 | No  |
| ENSMUSG00000083054 | 1,17E+00  | -3,14612376  | 6,40E-01  | 4,24E-01 | 7,18E-01 | Gm12986     | 2,26 | No  |
| ENSMUSG00000083055 | -7,40E-02 | 2,2488063    | 2,90E-01  | 5,90E-01 | 8,41E-01 | Gm14140     | 0,95 | No  |
| ENSMUSG00000083061 | -2,65E-01 | 7,830860517  | 2,06E+01  | 5,76E-06 | 2,05E-04 | Gm12191     | 0,83 | Yes |
| ENSMUSG00000083064 | -2,74E-02 | 3,787106457  | 8,71E-02  | 7,68E-01 | 9,41E-01 | Gm7785      | 0,98 | No  |
| ENSMUSG00000083070 | -1,87E+00 | -3,107637761 | 1,39E+00  | 2,38E-01 | 5,50E-01 | Gm13350     | 0,27 | No  |
| ENSMUSG00000083072 | -1,94E+00 | -3,107619243 | 1,50E+00  | 2,21E-01 | 5,50E-01 | Gm13668     | 0,26 | No  |
| ENSMUSG00000083075 | -1,16E+00 | -2,268116729 | 2,18E+00  | 1,40E-01 | 4,73E-01 | Gm11980     | 0,45 | No  |

|                    |           |              |          |          |          |            |      |    |
|--------------------|-----------|--------------|----------|----------|----------|------------|------|----|
| ENSMUSG00000083076 | -9,68E-01 | -2,355526908 | 1,13E+00 | 2,87E-01 | 5,83E-01 | Gm11408    | 0,51 | No |
| ENSMUSG00000083077 | -3,53E-01 | -1,448722619 | 4,78E-01 | 4,89E-01 | 7,76E-01 | Gm14126    | 0,78 | No |
| ENSMUSG00000083081 | -1,79E+00 | -2,205807414 | 4,33E+00 | 3,75E-02 | 2,30E-01 | Gm13223    | 0,29 | No |
| ENSMUSG00000083083 | 4,55E-01  | -1,683190474 | 5,72E-01 | 4,50E-01 | 7,40E-01 | Gm15382    | 1,37 | No |
| ENSMUSG00000083086 | -2,70E+00 | -3,033614577 | 2,89E+00 | 8,93E-02 | 3,79E-01 | Gm15531    | 0,15 | No |
| ENSMUSG00000083087 | -1,18E-01 | 4,867789372  | 2,41E+00 | 1,21E-01 | 4,33E-01 | Gm11249    | 0,92 | No |
| ENSMUSG00000083097 | -4,87E-02 | 6,153110765  | 5,66E-01 | 4,52E-01 | 7,42E-01 | Gm14494    | 0,97 | No |
| ENSMUSG00000083100 | -1,01E+00 | -1,65495478  | 2,60E+00 | 1,07E-01 | 4,01E-01 | Gm6044     | 0,50 | No |
| ENSMUSG00000083101 | -3,16E-01 | 0,581530187  | 1,72E+00 | 1,89E-01 | 5,50E-01 | Gm13430    | 0,80 | No |
| ENSMUSG00000083104 | -4,87E-01 | -1,355529749 | 8,26E-01 | 3,64E-01 | 6,65E-01 | Gm12917    | 0,71 | No |
| ENSMUSG00000083107 | 2,21E-01  | 3,040412602  | 3,83E+00 | 5,02E-02 | 2,72E-01 | Gm5303     | 1,17 | No |
| ENSMUSG00000083111 | 1,70E-01  | -0,48540864  | 2,60E-01 | 6,10E-01 | 8,51E-01 | Gm14421    | 1,13 | No |
| ENSMUSG00000083115 | -5,41E-01 | -2,311076229 | 4,69E-01 | 4,94E-01 | 7,79E-01 | Gm13386    | 0,69 | No |
| ENSMUSG00000083116 | -2,72E-02 | 5,588108401  | 1,57E-01 | 6,92E-01 | 9,00E-01 | Gm13410    | 0,98 | No |
| ENSMUSG00000083118 | -1,94E+00 | -3,107619243 | 1,50E+00 | 2,21E-01 | 5,50E-01 | Gm11609    | 0,26 | No |
| ENSMUSG00000083121 | -1,09E-01 | 1,552618129  | 3,95E-01 | 5,30E-01 | 8,05E-01 | Gm6341     | 0,93 | No |
| ENSMUSG00000083126 | -3,53E-01 | -0,424655    | 9,24E-01 | 3,36E-01 | 6,37E-01 | Gm14109    | 0,78 | No |
| ENSMUSG00000083139 | -2,91E-01 | 2,987366328  | 6,64E+00 | 1,00E-02 | 9,33E-02 | Gm12418    | 0,82 | No |
| ENSMUSG00000083142 | -1,92E+00 | -3,033623267 | 1,46E+00 | 2,27E-01 | 5,50E-01 | Gm12288    | 0,26 | No |
| ENSMUSG00000083149 | -6,88E-02 | -2,896163841 | 2,08E-03 | 9,64E-01 | 1,00E+00 | Gm11380    | 0,95 | No |
| ENSMUSG00000083150 | 4,79E-01  | -2,770633054 | 1,80E-01 | 6,71E-01 | 8,89E-01 | Gm11852    | 1,39 | No |
| ENSMUSG00000083152 | -4,20E-01 | 0,099766739  | 2,11E+00 | 1,46E-01 | 4,85E-01 | Apc-ps1    | 0,75 | No |
| ENSMUSG00000083156 | -1,20E-01 | -0,257796756 | 1,42E-01 | 7,06E-01 | 9,08E-01 | Gm12201    | 0,92 | No |
| ENSMUSG00000083157 | 5,95E-01  | -2,401385804 | 3,94E-01 | 5,30E-01 | 8,05E-01 | Gm13511    | 1,51 | No |
| ENSMUSG00000083159 | 3,00E-01  | 1,099954859  | 2,30E+00 | 1,30E-01 | 4,52E-01 | Gm12180    | 1,23 | No |
| ENSMUSG00000083161 | 5,23E-02  | 5,237615121  | 5,34E-01 | 4,65E-01 | 7,54E-01 | Gm11427    | 1,04 | No |
| ENSMUSG00000083163 | 2,65E+00  | -3,033655087 | 2,73E+00 | 9,86E-02 | 3,91E-01 | Gm11429    | 6,30 | No |
| ENSMUSG00000083168 | 1,85E+00  | -3,107657832 | 1,35E+00 | 2,46E-01 | 5,50E-01 | Gm14201    | 3,61 | No |
| ENSMUSG00000083169 | 4,88E-04  | 4,760128196  | 4,06E-05 | 9,95E-01 | 1,00E+00 | Gm6580     | 1,00 | No |
| ENSMUSG00000083170 | -2,91E-01 | -1,980485445 | 2,12E-01 | 6,45E-01 | 8,73E-01 | Gm14405    | 0,82 | No |
| ENSMUSG00000083171 | 1,95E-01  | 2,80334531   | 2,67E+00 | 1,03E-01 | 3,95E-01 | Gm12321    | 1,14 | No |
| ENSMUSG00000083176 | -4,79E-01 | -2,997999812 | 1,14E-01 | 7,35E-01 | 9,24E-01 | D11Bhm181e | 0,72 | No |

|                    |           |              |          |          |          |               |      |    |
|--------------------|-----------|--------------|----------|----------|----------|---------------|------|----|
| ENSMUSG00000083178 | -1,46E-01 | -2,088727692 | 4,34E-02 | 8,35E-01 | 9,80E-01 | Gm12187       | 0,90 | No |
| ENSMUSG00000083179 | -7,34E-02 | 5,150814285  | 1,03E+00 | 3,10E-01 | 6,09E-01 | Gm12693       | 0,95 | No |
| ENSMUSG00000083183 | 1,77E-02  | 3,081385184  | 2,51E-02 | 8,74E-01 | 1,00E+00 | Gm15575       | 1,01 | No |
| ENSMUSG00000083186 | 1,20E-01  | -0,25754883  | 1,52E-01 | 6,97E-01 | 9,03E-01 | Gm11805       | 1,09 | No |
| ENSMUSG00000083191 | -2,71E+00 | -3,033620915 | 2,92E+00 | 8,75E-02 | 3,78E-01 | Gm15571       | 0,15 | No |
| ENSMUSG00000083192 | -1,70E-01 | 5,358064391  | 5,87E+00 | 1,54E-02 | 1,28E-01 | Rpl31-ps12    | 0,89 | No |
| ENSMUSG00000083193 | -4,27E-01 | -1,831996068 | 3,80E-01 | 5,38E-01 | 8,09E-01 | 4930595D18Rik | 0,74 | No |
| ENSMUSG00000083206 | 7,54E-01  | -2,896122507 | 3,10E-01 | 5,78E-01 | 8,35E-01 | Gm11338       | 1,69 | No |
| ENSMUSG00000083208 | -8,18E-02 | -2,548202221 | 6,06E-03 | 9,38E-01 | 1,00E+00 | Gm11522       | 0,94 | No |
| ENSMUSG00000083209 | 4,09E-01  | -2,770625443 | 1,29E-01 | 7,19E-01 | 9,15E-01 | Gm11969       | 1,33 | No |
| ENSMUSG00000083212 | -1,87E+00 | -3,107637761 | 1,39E+00 | 2,38E-01 | 5,50E-01 | Gm12274       | 0,27 | No |
| ENSMUSG00000083215 | -9,52E-02 | -0,175608294 | 8,90E-02 | 7,65E-01 | 9,40E-01 | Rbmx2-ps      | 0,94 | No |
| ENSMUSG00000083218 | 8,81E-02  | 4,591416476  | 1,22E+00 | 2,69E-01 | 5,65E-01 | Gm16425       | 1,06 | No |
| ENSMUSG00000083219 | 1,81E+00  | -3,10765737  | 1,28E+00 | 2,58E-01 | 5,50E-01 | Gm11410       | 3,49 | No |
| ENSMUSG00000083220 | -3,04E-01 | 0,281260851  | 1,22E+00 | 2,70E-01 | 5,67E-01 | Gm12919       | 0,81 | No |
| ENSMUSG00000083233 | -2,70E+00 | -3,033614577 | 2,89E+00 | 8,93E-02 | 3,79E-01 | Gm13406       | 0,15 | No |
| ENSMUSG00000083234 | 1,87E+00  | -3,107639691 | 1,38E+00 | 2,40E-01 | 5,50E-01 | Gm12262       | 3,67 | No |
| ENSMUSG00000083235 | -2,59E-01 | -0,675975868 | 5,18E-01 | 4,72E-01 | 7,60E-01 | Gm13246       | 0,84 | No |
| ENSMUSG00000083237 | 2,10E-02  | -1,378223426 | 1,59E-03 | 9,68E-01 | 1,00E+00 | Gm11698       | 1,01 | No |
| ENSMUSG00000083240 | 6,71E-02  | 6,416572856  | 1,12E+00 | 2,89E-01 | 5,85E-01 | Gm13453       | 1,05 | No |
| ENSMUSG00000083241 | 7,31E-01  | -2,963243158 | 2,91E-01 | 5,90E-01 | 8,41E-01 | Gm13259       | 1,66 | No |
| ENSMUSG00000083242 | 9,76E-02  | -0,185632248 | 9,57E-02 | 7,57E-01 | 9,35E-01 | Gm15659       | 1,07 | No |
| ENSMUSG00000083244 | 1,85E+00  | -3,107657832 | 1,35E+00 | 2,46E-01 | 5,50E-01 | Gm15180       | 3,61 | No |
| ENSMUSG00000083245 | -1,73E-02 | -0,509892014 | 2,12E-03 | 9,63E-01 | 1,00E+00 | Gm11185       | 0,99 | No |
| ENSMUSG00000083246 | -8,75E-02 | 1,179708506  | 2,00E-01 | 6,55E-01 | 8,79E-01 | Gm11839       | 0,94 | No |
| ENSMUSG00000083252 | 1,87E+00  | -3,107639691 | 1,38E+00 | 2,40E-01 | 5,50E-01 | Gm13210       | 3,67 | No |
| ENSMUSG00000083257 | 6,17E-01  | -2,401367972 | 4,24E-01 | 5,15E-01 | 7,96E-01 | Gm15568       | 1,53 | No |
| ENSMUSG00000083261 | -8,26E-02 | 5,620386613  | 1,47E+00 | 2,25E-01 | 5,50E-01 | Gm7816        | 0,94 | No |
| ENSMUSG00000083264 | -7,88E-02 | -2,89616692  | 4,36E-03 | 9,47E-01 | 1,00E+00 | Gm11461       | 0,95 | No |
| ENSMUSG00000083268 | -1,87E+00 | -3,107637761 | 1,39E+00 | 2,38E-01 | 5,50E-01 | Gm11511       | 0,27 | No |
| ENSMUSG00000083270 | -3,12E-02 | 4,331943881  | 1,41E-01 | 7,07E-01 | 9,08E-01 | Gm13498       | 0,98 | No |
| ENSMUSG00000083274 | -2,68E+00 | -3,033645766 | 2,84E+00 | 9,17E-02 | 3,82E-01 | Zcchc9-ps     | 0,16 | No |

|                    |           |              |           |          |          |           |      |     |
|--------------------|-----------|--------------|-----------|----------|----------|-----------|------|-----|
| ENSMUSG00000083276 | 3,14E-02  | -3,107617333 | -7,69E-10 | 1,00E+00 | 1,00E+00 | Gm13551   | 1,02 | No  |
| ENSMUSG00000083277 | 6,37E-01  | -2,44867617  | 4,52E-01  | 5,01E-01 | 7,86E-01 | Gm15376   | 1,55 | No  |
| ENSMUSG00000083279 | -1,32E+00 | -2,832010255 | 1,09E+00  | 2,96E-01 | 5,92E-01 | Pex13-ps  | 0,40 | No  |
| ENSMUSG00000083280 | 9,62E-02  | 4,191368024  | 1,25E+00  | 2,64E-01 | 5,59E-01 | Gm11838   | 1,07 | No  |
| ENSMUSG00000083281 | 1,65E-01  | 0,715701114  | 5,34E-01  | 4,65E-01 | 7,54E-01 | Gm13332   | 1,12 | No  |
| ENSMUSG00000083282 | 7,06E-02  | 2,848057633  | 3,47E-01  | 5,56E-01 | 8,21E-01 | Ctsf      | 1,05 | No  |
| ENSMUSG00000083287 | -8,27E-02 | 5,25128693   | 1,37E+00  | 2,42E-01 | 5,50E-01 | Gm13502   | 0,94 | No  |
| ENSMUSG00000083289 | 3,58E-01  | -0,333372344 | 1,20E+00  | 2,73E-01 | 5,69E-01 | Gm8812    | 1,28 | No  |
| ENSMUSG00000083298 | 8,93E-01  | -1,863786166 | 2,03E+00  | 1,55E-01 | 4,98E-01 | Gm12085   | 1,86 | No  |
| ENSMUSG00000083305 | 9,55E-02  | 0,233196545  | 1,23E-01  | 7,25E-01 | 9,18E-01 | Gm13315   | 1,07 | No  |
| ENSMUSG00000083306 | -2,67E+00 | -2,448593492 | 6,57E+00  | 1,04E-02 | 9,60E-02 | Gm13868   | 0,16 | No  |
| ENSMUSG00000083319 | 1,27E+00  | -2,401430521 | 2,19E+00  | 1,39E-01 | 4,71E-01 | Gm11284   | 2,41 | No  |
| ENSMUSG00000083320 | 4,39E-01  | -1,205601484 | 7,97E-01  | 3,72E-01 | 6,73E-01 | Gm13935   | 1,36 | No  |
| ENSMUSG00000083325 | 1,56E-02  | 5,717387006  | 5,38E-02  | 8,17E-01 | 9,69E-01 | Gm14121   | 1,01 | No  |
| ENSMUSG00000083326 | -2,48E-01 | 1,277360762  | 1,73E+00  | 1,89E-01 | 5,50E-01 | Rpl38-ps1 | 0,84 | No  |
| ENSMUSG00000083328 | -2,94E-01 | 4,646553083  | 1,40E+01  | 1,87E-04 | 4,11E-03 | Gm11826   | 0,82 | Yes |
| ENSMUSG00000083332 | -2,15E-01 | -1,683140051 | 1,24E-01  | 7,24E-01 | 9,18E-01 | Gm7599    | 0,86 | No  |
| ENSMUSG00000083335 | -1,87E+00 | -3,107637761 | 1,39E+00  | 2,38E-01 | 5,50E-01 | Gm13397   | 0,27 | No  |
| ENSMUSG00000083337 | -3,50E-01 | 5,873565832  | 2,78E+01  | 1,34E-07 | 7,22E-06 | Gm11539   | 0,78 | Yes |
| ENSMUSG00000083338 | -1,42E-01 | 1,7709682    | 8,20E-01  | 3,65E-01 | 6,66E-01 | Gm12475   | 0,91 | No  |
| ENSMUSG00000083339 | -1,06E+00 | -1,146013957 | 5,12E+00  | 2,37E-02 | 1,69E-01 | Gm11693   | 0,48 | No  |
| ENSMUSG00000083340 | -1,36E+00 | -2,832009022 | 1,17E+00  | 2,80E-01 | 5,77E-01 | Gm13156   | 0,39 | No  |
| ENSMUSG00000083342 | -7,36E-02 | -2,44864231  | 6,20E-03  | 9,37E-01 | 1,00E+00 | Gm14237   | 0,95 | No  |
| ENSMUSG00000083344 | -1,05E+00 | 0,452162439  | 1,69E+01  | 4,04E-05 | 1,13E-03 | Gm7363    | 0,48 | Yes |
| ENSMUSG00000083353 | -6,39E-02 | -2,963280242 | 1,86E-03  | 9,66E-01 | 1,00E+00 | Gm12540   | 0,96 | No  |
| ENSMUSG00000083356 | -2,48E-01 | 0,266937334  | 8,25E-01  | 3,64E-01 | 6,65E-01 | Gm11708   | 0,84 | No  |
| ENSMUSG00000083359 | -3,83E-02 | -3,107651936 | -7,91E-11 | 1,00E+00 | 1,00E+00 | Gm12656   | 0,97 | No  |
| ENSMUSG00000083368 | 1,87E+00  | -3,107639691 | 1,38E+00  | 2,40E-01 | 5,50E-01 | Gm13214   | 3,67 | No  |
| ENSMUSG00000083371 | 2,74E-02  | -3,033621357 | 9,16E-12  | 1,00E+00 | 1,00E+00 | Gm11422   | 1,02 | No  |
| ENSMUSG00000083372 | 3,36E-01  | 0,598591889  | 1,94E+00  | 1,64E-01 | 5,15E-01 | Gm11235   | 1,26 | No  |
| ENSMUSG00000083373 | -1,24E-01 | 2,815676865  | 1,08E+00  | 3,00E-01 | 5,96E-01 | Gm13392   | 0,92 | No  |
| ENSMUSG00000083374 | -1,53E-02 | 0,92747179   | 5,28E-03  | 9,42E-01 | 1,00E+00 | Gm11449   | 0,99 | No  |

|                    |           |              |           |          |          |            |      |     |
|--------------------|-----------|--------------|-----------|----------|----------|------------|------|-----|
| ENSMUSG00000083377 | -8,23E-02 | -1,800976502 | 1,58E-02  | 9,00E-01 | 1,00E+00 | Gm12653    | 0,94 | No  |
| ENSMUSG00000083378 | -1,50E-01 | 4,758778384  | 3,79E+00  | 5,16E-02 | 2,77E-01 | Gm13196    | 0,90 | No  |
| ENSMUSG00000083380 | -4,33E-02 | 4,061047263  | 2,44E-01  | 6,21E-01 | 8,57E-01 | Gm3244     | 0,97 | No  |
| ENSMUSG00000083382 | 4,29E-02  | 3,623267354  | 1,95E-01  | 6,59E-01 | 8,81E-01 | Gm6433     | 1,03 | No  |
| ENSMUSG00000083390 | 1,85E+00  | -3,107657832 | 1,35E+00  | 2,46E-01 | 5,50E-01 | Gm13121    | 3,61 | No  |
| ENSMUSG00000083391 | 4,55E-01  | -2,497578088 | 1,62E-01  | 6,88E-01 | 8,98E-01 | Gm14148    | 1,37 | No  |
| ENSMUSG00000083394 | -3,14E-01 | 4,237489334  | 1,37E+01  | 2,17E-04 | 4,64E-03 | Gm11703    | 0,80 | Yes |
| ENSMUSG00000083396 | -1,57E-01 | 6,188145298  | 5,99E+00  | 1,44E-02 | 1,22E-01 | Gm15542    | 0,90 | No  |
| ENSMUSG00000083397 | -6,28E-01 | -1,185381965 | 1,45E+00  | 2,28E-01 | 5,50E-01 | Gm5466     | 0,65 | No  |
| ENSMUSG00000083404 | -6,48E-02 | -2,963249916 | 1,90E-03  | 9,65E-01 | 1,00E+00 | Gm13019    | 0,96 | No  |
| ENSMUSG00000083405 | -1,64E-01 | 7,906712078  | 7,89E+00  | 4,98E-03 | 5,58E-02 | Gm15725    | 0,89 | No  |
| ENSMUSG00000083407 | 2,06E-01  | 1,295100813  | 1,23E+00  | 2,67E-01 | 5,63E-01 | Gm13176    | 1,15 | No  |
| ENSMUSG00000083410 | -1,98E-02 | -3,033655952 | 2,83E-11  | 1,00E+00 | 1,00E+00 | Gm14300    | 0,99 | No  |
| ENSMUSG00000083412 | 3,14E-02  | -3,107617333 | -7,69E-10 | 1,00E+00 | 1,00E+00 | Gm12268    | 1,02 | No  |
| ENSMUSG00000083424 | -2,33E-01 | 5,477943591  | 1,12E+01  | 8,22E-04 | 1,38E-02 | Rpl35a-ps4 | 0,85 | Yes |
| ENSMUSG00000083425 | -1,87E+00 | -3,107637761 | 1,39E+00  | 2,38E-01 | 5,50E-01 | Gm13992    | 0,27 | No  |
| ENSMUSG00000083429 | -1,73E+00 | -2,655059731 | 2,08E+00  | 1,49E-01 | 4,90E-01 | Gm15198    | 0,30 | No  |
| ENSMUSG00000083430 | 6,87E-01  | -2,832001409 | 2,58E-01  | 6,12E-01 | 8,52E-01 | Gm13006    | 1,61 | No  |
| ENSMUSG00000083431 | -1,94E+00 | -3,107619243 | 1,50E+00  | 2,21E-01 | 5,50E-01 | Gm13437    | 0,26 | No  |
| ENSMUSG00000083435 | -1,44E-01 | -0,257493725 | 1,82E-01  | 6,70E-01 | 8,88E-01 | Gm15824    | 0,91 | No  |
| ENSMUSG00000083441 | -1,91E+00 | -2,963238542 | 1,45E+00  | 2,29E-01 | 5,50E-01 | Gm15329    | 0,27 | No  |
| ENSMUSG00000083443 | 1,64E-02  | 5,842925101  | 6,14E-02  | 8,04E-01 | 9,63E-01 | Gm15519    | 1,01 | No  |
| ENSMUSG00000083449 | -3,06E-01 | 2,993141864  | 7,32E+00  | 6,84E-03 | 7,05E-02 | Gm13487    | 0,81 | No  |
| ENSMUSG00000083454 | 1,43E-02  | 2,641104655  | 1,34E-02  | 9,08E-01 | 1,00E+00 | Gm13226    | 1,01 | No  |
| ENSMUSG00000083458 | 1,33E-02  | 5,787703654  | 3,96E-02  | 8,42E-01 | 9,85E-01 | Gm5510     | 1,01 | No  |
| ENSMUSG00000083460 | 4,94E-01  | -1,614179019 | 6,85E-01  | 4,08E-01 | 7,05E-01 | Gm12182    | 1,41 | No  |
| ENSMUSG00000083461 | 6,30E-01  | -2,44867571  | 4,42E-01  | 5,06E-01 | 7,91E-01 | Gm12935    | 1,55 | No  |
| ENSMUSG00000083462 | -2,21E-02 | -0,668989512 | 3,37E-03  | 9,54E-01 | 1,00E+00 | Gm12501    | 0,98 | No  |
| ENSMUSG00000083465 | -2,93E-02 | 6,436357722  | 2,16E-01  | 6,42E-01 | 8,71E-01 | Gm11652    | 0,98 | No  |
| ENSMUSG00000083471 | 1,87E+00  | -3,107639691 | 1,38E+00  | 2,40E-01 | 5,50E-01 | Gm12118    | 3,67 | No  |
| ENSMUSG00000083473 | 2,15E+00  | -2,497667953 | 3,70E+00  | 5,43E-02 | 2,85E-01 | Gm13207    | 4,44 | No  |
| ENSMUSG00000083477 | -1,66E-01 | 5,504697749  | 5,85E+00  | 1,56E-02 | 1,29E-01 | Gm5555     | 0,89 | No  |

|                    |           |              |           |          |          |          |       |     |
|--------------------|-----------|--------------|-----------|----------|----------|----------|-------|-----|
| ENSMUSG00000083478 | 3,14E-02  | -3,107617333 | -7,69E-10 | 1,00E+00 | 1,00E+00 | Gm15375  | 1,02  | No  |
| ENSMUSG00000083481 | -7,93E-02 | 5,844361704  | 1,42E+00  | 2,34E-01 | 5,50E-01 | Rps8-ps2 | 0,95  | No  |
| ENSMUSG00000083483 | -1,46E-01 | 3,06271934   | 1,71E+00  | 1,91E-01 | 5,50E-01 | Gm14044  | 0,90  | No  |
| ENSMUSG00000083495 | 3,14E-02  | -3,107617333 | -7,69E-10 | 1,00E+00 | 1,00E+00 | Gm13877  | 1,02  | No  |
| ENSMUSG00000083496 | -2,68E-01 | 5,358912     | 1,46E+01  | 1,30E-04 | 3,03E-03 | Gm11263  | 0,83  | Yes |
| ENSMUSG00000083500 | -1,97E-01 | 1,342652854  | 1,10E+00  | 2,95E-01 | 5,90E-01 | Gm15470  | 0,87  | No  |
| ENSMUSG00000083505 | -7,18E-01 | -2,600667221 | 5,76E-01  | 4,48E-01 | 7,38E-01 | Gm7541   | 0,61  | No  |
| ENSMUSG00000083512 | -2,19E-01 | 4,151899009  | 6,44E+00  | 1,12E-02 | 1,01E-01 | Gm12749  | 0,86  | No  |
| ENSMUSG00000083522 | -1,94E+00 | -3,107619243 | 1,50E+00  | 2,21E-01 | 5,50E-01 | Gm15321  | 0,26  | No  |
| ENSMUSG00000083528 | 1,87E+00  | -3,107639691 | 1,38E+00  | 2,40E-01 | 5,50E-01 | Gm13432  | 3,67  | No  |
| ENSMUSG00000083533 | 4,96E-02  | 2,204514362  | 1,26E-01  | 7,23E-01 | 9,17E-01 | Gm13450  | 1,04  | No  |
| ENSMUSG00000083534 | 1,23E+00  | -2,832030918 | 9,42E-01  | 3,32E-01 | 6,32E-01 | H2-M6-ps | 2,35  | No  |
| ENSMUSG00000083536 | 3,55E+00  | -2,71167829  | 5,48E+00  | 1,93E-02 | 1,48E-01 | Gm15808  | 11,72 | No  |
| ENSMUSG00000083538 | 5,34E-01  | -1,770635851 | 8,13E-01  | 3,67E-01 | 6,68E-01 | Gm16016  | 1,45  | No  |
| ENSMUSG00000083539 | -1,94E+00 | -3,107619243 | 1,50E+00  | 2,21E-01 | 5,50E-01 | Gm12466  | 0,26  | No  |
| ENSMUSG00000083545 | -6,47E-01 | 0,55176431   | 6,72E+00  | 9,52E-03 | 8,99E-02 | Gm13320  | 0,64  | No  |
| ENSMUSG00000083546 | 3,14E-02  | -3,107617333 | -7,69E-10 | 1,00E+00 | 1,00E+00 | Tpt1-ps1 | 1,02  | No  |
| ENSMUSG00000083547 | -2,74E+00 | -3,033596063 | 2,99E+00  | 8,38E-02 | 3,71E-01 | Gm13321  | 0,15  | No  |
| ENSMUSG00000083549 | -6,60E-02 | -1,311231198 | 1,94E-02  | 8,89E-01 | 1,00E+00 | Gm11227  | 0,96  | No  |
| ENSMUSG00000083553 | -3,15E-01 | -0,485199998 | 8,48E-01  | 3,57E-01 | 6,58E-01 | Gm11989  | 0,80  | No  |
| ENSMUSG00000083555 | 1,88E+00  | -2,896120282 | 1,36E+00  | 2,43E-01 | 5,50E-01 | Gm12035  | 3,67  | No  |
| ENSMUSG00000083557 | -2,90E-02 | 2,291967136  | 4,46E-02  | 8,33E-01 | 9,78E-01 | Gm6877   | 0,98  | No  |
| ENSMUSG00000083562 | -1,49E-01 | -0,366907942 | 2,00E-01  | 6,55E-01 | 8,79E-01 | Gm13234  | 0,90  | No  |
| ENSMUSG00000083563 | -1,63E-01 | 6,907939806  | 7,12E+00  | 7,64E-03 | 7,65E-02 | Gm13340  | 0,89  | No  |
| ENSMUSG00000083567 | 2,15E-01  | 1,313199825  | 1,30E+00  | 2,55E-01 | 5,50E-01 | Gm11451  | 1,16  | No  |
| ENSMUSG00000083569 | -5,70E-01 | -2,497563617 | 2,55E-01  | 6,14E-01 | 8,53E-01 | Gm13666  | 0,67  | No  |
| ENSMUSG00000083579 | 8,55E-01  | -2,268067974 | 8,80E-01  | 3,48E-01 | 6,49E-01 | Gm15538  | 1,81  | No  |
| ENSMUSG00000083580 | -1,94E+00 | -3,107619243 | 1,50E+00  | 2,21E-01 | 5,50E-01 | Rpsa-ps3 | 0,26  | No  |
| ENSMUSG00000083582 | -1,87E+00 | -3,03364178  | 1,41E+00  | 2,36E-01 | 5,50E-01 | Gm15393  | 0,27  | No  |
| ENSMUSG00000083594 | 1,87E+00  | -3,107639691 | 1,38E+00  | 2,40E-01 | 5,50E-01 | Gm13722  | 3,67  | No  |
| ENSMUSG00000083599 | -1,36E-01 | 2,704494881  | 1,23E+00  | 2,66E-01 | 5,63E-01 | Gm12821  | 0,91  | No  |
| ENSMUSG00000083606 | -1,89E+00 | -3,1076441   | 1,42E+00  | 2,33E-01 | 5,50E-01 | Gm15916  | 0,27  | No  |



|                    |           |              |          |          |          |           |      |     |
|--------------------|-----------|--------------|----------|----------|----------|-----------|------|-----|
| ENSMUSG00000083609 | -2,72E+00 | -2,963211345 | 2,94E+00 | 8,63E-02 | 3,78E-01 | Gm16007   | 0,15 | No  |
| ENSMUSG00000083610 | -2,36E-02 | 2,786695898  | 3,95E-02 | 8,43E-01 | 9,85E-01 | Oaz2-ps   | 0,98 | No  |
| ENSMUSG00000083614 | -8,03E-01 | -2,896132011 | 3,52E-01 | 5,53E-01 | 8,19E-01 | Gm12795   | 0,57 | No  |
| ENSMUSG00000083618 | -6,69E-02 | -2,770615001 | 3,03E-03 | 9,56E-01 | 1,00E+00 | Gm11771   | 0,95 | No  |
| ENSMUSG00000083619 | -5,83E-02 | 5,710702484  | 7,50E-01 | 3,86E-01 | 6,87E-01 | Gm14414   | 0,96 | No  |
| ENSMUSG00000083620 | 2,62E+00  | -2,963293967 | 2,65E+00 | 1,04E-01 | 3,95E-01 | Gm15529   | 6,13 | No  |
| ENSMUSG00000083622 | -1,95E+00 | -3,033628749 | 1,50E+00 | 2,21E-01 | 5,50E-01 | Gm15570   | 0,26 | No  |
| ENSMUSG00000083623 | 1,05E-01  | -0,268271746 | 1,00E-01 | 7,52E-01 | 9,32E-01 | Gm7224    | 1,08 | No  |
| ENSMUSG00000083624 | -1,94E+00 | -3,107619243 | 1,50E+00 | 2,21E-01 | 5,50E-01 | Gm12469   | 0,26 | No  |
| ENSMUSG00000083626 | -2,23E-02 | 4,545918203  | 7,84E-02 | 7,79E-01 | 9,48E-01 | Gm4459    | 0,98 | No  |
| ENSMUSG00000083627 | -2,79E-01 | 0,090305452  | 9,22E-01 | 3,37E-01 | 6,38E-01 | Gm12502   | 0,82 | No  |
| ENSMUSG00000083630 | 1,01E+00  | -1,929354628 | 2,01E+00 | 1,56E-01 | 5,01E-01 | Gm15602   | 2,02 | No  |
| ENSMUSG00000083642 | 2,57E-02  | -1,355539046 | 2,40E-03 | 9,61E-01 | 1,00E+00 | Gm13148   | 1,02 | No  |
| ENSMUSG00000083645 | -1,14E-02 | -3,033635021 | 1,50E-05 | 9,97E-01 | 1,00E+00 | Gm14086   | 0,99 | No  |
| ENSMUSG00000083649 | 2,97E-01  | -1,401419586 | 2,56E-01 | 6,13E-01 | 8,53E-01 | Rasl2-9   | 1,23 | No  |
| ENSMUSG00000083650 | 8,41E-01  | -1,268258252 | 2,67E+00 | 1,02E-01 | 3,94E-01 | Gm13357   | 1,79 | No  |
| ENSMUSG00000083655 | -1,35E-01 | -0,175495765 | 1,88E-01 | 6,64E-01 | 8,84E-01 | Gm12099   | 0,91 | No  |
| ENSMUSG00000083658 | -8,06E-01 | -1,80085729  | 1,55E+00 | 2,14E-01 | 5,50E-01 | Gm15798   | 0,57 | No  |
| ENSMUSG00000083661 | 1,61E+00  | -1,832024679 | 6,20E+00 | 1,28E-02 | 1,12E-01 | Gm11473   | 3,06 | No  |
| ENSMUSG00000083664 | -1,89E+00 | -3,1076441   | 1,42E+00 | 2,33E-01 | 5,50E-01 | Gm11433   | 0,27 | No  |
| ENSMUSG00000083669 | 2,91E-01  | 5,137651214  | 1,59E+01 | 6,77E-05 | 1,75E-03 | Gm10169   | 1,22 | Yes |
| ENSMUSG00000083671 | 7,31E-01  | -2,963267542 | 2,91E-01 | 5,90E-01 | 8,41E-01 | Gm14304   | 1,66 | No  |
| ENSMUSG00000083672 | 1,16E-01  | 0,028123767  | 1,59E-01 | 6,90E-01 | 8,99E-01 | Kpna2-ps  | 1,08 | No  |
| ENSMUSG00000083674 | 2,72E+00  | -2,107718311 | 6,99E+00 | 8,21E-03 | 8,06E-02 | Zfp133-ps | 6,57 | No  |
| ENSMUSG00000083677 | -4,20E-01 | 0,337651586  | 2,40E+00 | 1,21E-01 | 4,34E-01 | Gm11699   | 0,75 | No  |
| ENSMUSG00000083678 | 5,88E-03  | 4,961395527  | 6,19E-03 | 9,37E-01 | 1,00E+00 | Gm12989   | 1,00 | No  |
| ENSMUSG00000083679 | 9,08E-02  | 5,758075434  | 1,83E+00 | 1,77E-01 | 5,36E-01 | Gm12892   | 1,06 | No  |
| ENSMUSG00000083681 | 1,65E-01  | 3,761870385  | 3,03E+00 | 8,15E-02 | 3,66E-01 | Gm6640    | 1,12 | No  |
| ENSMUSG00000083688 | -2,28E-01 | 3,265315172  | 4,61E+00 | 3,17E-02 | 2,06E-01 | Gm13743   | 0,85 | No  |
| ENSMUSG00000083692 | -5,80E-02 | 5,241568547  | 6,53E-01 | 4,19E-01 | 7,14E-01 | Gm9575    | 0,96 | No  |
| ENSMUSG00000083693 | 6,93E-02  | -1,770581457 | 1,40E-02 | 9,06E-01 | 1,00E+00 | Gm11971   | 1,05 | No  |
| ENSMUSG00000083700 | -3,16E-01 | 3,025591586  | 7,63E+00 | 5,75E-03 | 6,20E-02 | Gm2986    | 0,80 | No  |

|                    |           |              |          |          |          |             |      |     |
|--------------------|-----------|--------------|----------|----------|----------|-------------|------|-----|
| ENSMUSG00000083704 | -6,48E-02 | -2,963249916 | 1,90E-03 | 9,65E-01 | 1,00E+00 | Gm13153     | 0,96 | No  |
| ENSMUSG00000083705 | -6,95E-01 | -0,257583363 | 4,98E+00 | 2,56E-02 | 1,78E-01 | Gm8624      | 0,62 | No  |
| ENSMUSG00000083708 | 6,35E-02  | 2,754784304  | 2,93E-01 | 5,88E-01 | 8,40E-01 | Gm13123     | 1,05 | No  |
| ENSMUSG00000083713 | 5,67E-01  | -1,770634733 | 7,31E-01 | 3,93E-01 | 6,93E-01 | Gm5883      | 1,48 | No  |
| ENSMUSG00000083716 | -1,26E-01 | 7,890620539  | 4,62E+00 | 3,16E-02 | 2,06E-01 | Gm13436     | 0,92 | No  |
| ENSMUSG00000083717 | 1,87E+00  | -3,107639691 | 1,38E+00 | 2,40E-01 | 5,50E-01 | Gm13865     | 3,67 | No  |
| ENSMUSG00000083718 | -5,87E-01 | -0,648002664 | 2,39E+00 | 1,22E-01 | 4,36E-01 | Ccnb2-ps    | 0,67 | No  |
| ENSMUSG00000083723 | -1,34E+00 | -2,896111155 | 1,13E+00 | 2,89E-01 | 5,84E-01 | Rpl23a-ps14 | 0,39 | No  |
| ENSMUSG00000083725 | -2,10E-01 | 1,104260657  | 1,08E+00 | 2,99E-01 | 5,95E-01 | Gm11865     | 0,86 | No  |
| ENSMUSG00000083728 | -9,36E-01 | -2,655064798 | 7,68E-01 | 3,81E-01 | 6,82E-01 | Gm13854     | 0,52 | No  |
| ENSMUSG00000083731 | -3,90E-02 | -2,655097813 | 1,36E-03 | 9,71E-01 | 1,00E+00 | Gm16202     | 0,97 | No  |
| ENSMUSG00000083732 | 3,14E+00  | -2,89616069  | 4,02E+00 | 4,51E-02 | 2,53E-01 | Gm14197     | 8,80 | No  |
| ENSMUSG00000083733 | -1,87E+00 | -3,107637761 | 1,39E+00 | 2,38E-01 | 5,50E-01 | Gm13035     | 0,27 | No  |
| ENSMUSG00000083734 | 1,30E-02  | 1,389617016  | 4,87E-03 | 9,44E-01 | 1,00E+00 | Gm16209     | 1,01 | No  |
| ENSMUSG00000083737 | 1,30E-01  | 0,638807893  | 2,94E-01 | 5,88E-01 | 8,40E-01 | Prdx6-ps2   | 1,09 | No  |
| ENSMUSG00000083745 | -1,33E+00 | -2,770602484 | 1,11E+00 | 2,92E-01 | 5,87E-01 | Gm13543     | 0,40 | No  |
| ENSMUSG00000083748 | -2,63E-02 | -3,033653157 | 2,33E-04 | 9,88E-01 | 1,00E+00 | Gm11662     | 0,98 | No  |
| ENSMUSG00000083750 | -1,94E+00 | -3,107619243 | 1,50E+00 | 2,21E-01 | 5,50E-01 | Gm14108     | 0,26 | No  |
| ENSMUSG00000083757 | -3,22E-01 | 5,81596205   | 2,34E+01 | 1,32E-06 | 5,69E-05 | Rps15a-ps4  | 0,80 | Yes |
| ENSMUSG00000083761 | 4,52E-02  | 1,661363317  | 7,09E-02 | 7,90E-01 | 9,54E-01 | Pgam1-ps1   | 1,03 | No  |
| ENSMUSG00000083764 | -5,98E-02 | 3,834616979  | 4,19E-01 | 5,17E-01 | 7,98E-01 | Gm11516     | 0,96 | No  |
| ENSMUSG00000083767 | -7,31E-02 | 4,477102719  | 8,18E-01 | 3,66E-01 | 6,67E-01 | Gm11405     | 0,95 | No  |
| ENSMUSG00000083771 | -1,94E+00 | -3,107619243 | 1,50E+00 | 2,21E-01 | 5,50E-01 | Gm15988     | 0,26 | No  |
| ENSMUSG00000083773 | 8,36E-02  | 7,932143613  | 2,05E+00 | 1,52E-01 | 4,94E-01 | Gm13394     | 1,06 | No  |
| ENSMUSG00000083774 | -9,97E-02 | 4,13159775   | 1,31E+00 | 2,52E-01 | 5,50E-01 | Gm7180      | 0,93 | No  |
| ENSMUSG00000083777 | 2,75E-01  | 0,412288815  | 1,09E+00 | 2,96E-01 | 5,92E-01 | Gm13361     | 1,21 | No  |
| ENSMUSG00000083780 | 4,59E-01  | -2,355538726 | 2,85E-01 | 5,93E-01 | 8,42E-01 | Gm12728     | 1,37 | No  |
| ENSMUSG00000083783 | -1,89E+00 | -3,1076441   | 1,42E+00 | 2,33E-01 | 5,50E-01 | Gm12739     | 0,27 | No  |
| ENSMUSG00000083791 | -5,88E-02 | -3,033652696 | 1,62E-03 | 9,68E-01 | 1,00E+00 | Gm12721     | 0,96 | No  |
| ENSMUSG00000083793 | -2,69E-01 | 2,381510991  | 3,89E+00 | 4,85E-02 | 2,65E-01 | Gm14274     | 0,83 | No  |
| ENSMUSG00000083796 | -1,86E-01 | -0,107764525 | 3,17E-01 | 5,74E-01 | 8,33E-01 | Gm13369     | 0,88 | No  |
| ENSMUSG00000083803 | 1,83E+00  | -2,963282593 | 1,33E+00 | 2,50E-01 | 5,50E-01 | Gm12455     | 3,56 | No  |

|                    |           |              |          |          |          |            |      |     |
|--------------------|-----------|--------------|----------|----------|----------|------------|------|-----|
| ENSMUSG00000083804 | 9,34E-03  | 1,66959463   | 3,20E-03 | 9,55E-01 | 1,00E+00 | Gm13676    | 1,01 | No  |
| ENSMUSG00000083808 | 1,82E+00  | -3,033667329 | 1,31E+00 | 2,52E-01 | 5,50E-01 | Gm3828     | 3,54 | No  |
| ENSMUSG00000083811 | 5,61E-02  | -0,997984498 | 1,77E-02 | 8,94E-01 | 1,00E+00 | Gm13071    | 1,04 | No  |
| ENSMUSG00000083812 | 1,81E+00  | -3,10765737  | 1,28E+00 | 2,58E-01 | 5,50E-01 | Gm5054     | 3,49 | No  |
| ENSMUSG00000083813 | 2,96E-02  | 3,348437674  | 8,12E-02 | 7,76E-01 | 9,45E-01 | Gm15502    | 1,02 | No  |
| ENSMUSG00000083815 | 8,41E-01  | -0,333269527 | 4,93E+00 | 2,64E-02 | 1,82E-01 | Gm13435    | 1,79 | No  |
| ENSMUSG00000083816 | 1,60E-01  | 1,001929518  | 6,04E-01 | 4,37E-01 | 7,30E-01 | Gm13033    | 1,12 | No  |
| ENSMUSG00000083817 | 1,07E+00  | -2,497667382 | 1,46E+00 | 2,27E-01 | 5,50E-01 | Gm14400    | 2,09 | No  |
| ENSMUSG00000083819 | 4,31E-02  | 2,962077829  | 1,50E-01 | 6,98E-01 | 9,04E-01 | Gm11977    | 1,03 | No  |
| ENSMUSG00000083820 | 3,57E-02  | 3,659978603  | 1,38E-01 | 7,11E-01 | 9,10E-01 | Gm6415     | 1,03 | No  |
| ENSMUSG00000083822 | -9,68E-02 | 1,749171924  | 3,66E-01 | 5,45E-01 | 8,13E-01 | Hmgb1-ps5  | 0,94 | No  |
| ENSMUSG00000083826 | -1,37E-01 | -1,051773313 | 1,04E-01 | 7,48E-01 | 9,30E-01 | Gm13039    | 0,91 | No  |
| ENSMUSG00000083829 | 1,13E-02  | 5,800510173  | 2,87E-02 | 8,65E-01 | 9,98E-01 | Gm2199     | 1,01 | No  |
| ENSMUSG00000083832 | -1,13E-01 | 4,131357841  | 1,68E+00 | 1,95E-01 | 5,50E-01 | Gm13771    | 0,92 | No  |
| ENSMUSG00000083833 | -1,40E-01 | 4,854839257  | 3,41E+00 | 6,48E-02 | 3,19E-01 | Gm13841    | 0,91 | No  |
| ENSMUSG00000083834 | -2,93E-01 | 1,306664717  | 2,60E+00 | 1,07E-01 | 4,00E-01 | Gm12577    | 0,82 | No  |
| ENSMUSG00000083836 | 2,04E-01  | 6,733627354  | 1,09E+01 | 9,64E-04 | 1,57E-02 | Ldha-ps2   | 1,15 | Yes |
| ENSMUSG00000083837 | -1,89E+00 | -3,1076441   | 1,42E+00 | 2,33E-01 | 5,50E-01 | Gm14427    | 0,27 | No  |
| ENSMUSG00000083838 | -3,84E-01 | -1,146137983 | 6,87E-01 | 4,07E-01 | 7,04E-01 | Gm11957    | 0,77 | No  |
| ENSMUSG00000083842 | -2,73E-02 | -2,963256629 | 3,40E-04 | 9,85E-01 | 1,00E+00 | Gm12485    | 0,98 | No  |
| ENSMUSG00000083844 | 8,83E-03  | 3,727744884  | 8,79E-03 | 9,25E-01 | 1,00E+00 | Ube2d-ps   | 1,01 | No  |
| ENSMUSG00000083846 | 7,43E-01  | -2,963261206 | 3,01E-01 | 5,83E-01 | 8,38E-01 | Gm13797    | 1,67 | No  |
| ENSMUSG00000083849 | -3,74E-02 | 1,894460778  | 5,98E-02 | 8,07E-01 | 9,64E-01 | Gm13477    | 0,97 | No  |
| ENSMUSG00000083852 | -9,42E-02 | -0,205576986 | 9,51E-02 | 7,58E-01 | 9,35E-01 | Gm13007    | 0,94 | No  |
| ENSMUSG00000083853 | 9,99E-01  | -0,535482685 | 5,99E+00 | 1,44E-02 | 1,22E-01 | Gm15696    | 2,00 | No  |
| ENSMUSG00000083854 | 1,20E-01  | 4,078060524  | 1,89E+00 | 1,69E-01 | 5,23E-01 | Dnajc19-ps | 1,09 | No  |
| ENSMUSG00000083856 | 3,13E-02  | 3,57261134   | 1,03E-01 | 7,48E-01 | 9,30E-01 | Gm13886    | 1,02 | No  |
| ENSMUSG00000083859 | -9,06E-01 | -2,088751681 | 1,75E+00 | 1,86E-01 | 5,50E-01 | Gm12003    | 0,53 | No  |
| ENSMUSG00000083860 | -4,30E-01 | 0,045261428  | 2,08E+00 | 1,49E-01 | 4,90E-01 | Gm13313    | 0,74 | No  |
| ENSMUSG00000083863 | 3,23E-02  | 6,240918287  | 2,54E-01 | 6,15E-01 | 8,53E-01 | Gm13341    | 1,02 | No  |
| ENSMUSG00000083864 | -1,76E-01 | 2,476008095  | 1,86E+00 | 1,72E-01 | 5,29E-01 | Gm13719    | 0,89 | No  |
| ENSMUSG00000083870 | 1,81E+00  | -3,10765737  | 1,28E+00 | 2,58E-01 | 5,50E-01 | Gm11761    | 3,49 | No  |

|                    |           |              |           |          |          |            |      |     |
|--------------------|-----------|--------------|-----------|----------|----------|------------|------|-----|
| ENSMUSG00000083873 | 1,81E+00  | -3,10765737  | 1,28E+00  | 2,58E-01 | 5,50E-01 | Vmn1r-ps92 | 3,49 | No  |
| ENSMUSG00000083874 | -3,83E-02 | -3,107651936 | -7,91E-11 | 1,00E+00 | 1,00E+00 | Gm7494     | 0,97 | No  |
| ENSMUSG00000083875 | 7,22E-01  | -2,711718047 | 2,84E-01  | 5,94E-01 | 8,43E-01 | Gm13831    | 1,65 | No  |
| ENSMUSG00000083876 | -8,91E-01 | -2,896142986 | 4,37E-01  | 5,09E-01 | 7,92E-01 | Gm11439    | 0,54 | No  |
| ENSMUSG00000083878 | -2,62E-01 | 0,112246236  | 8,28E-01  | 3,63E-01 | 6,64E-01 | Gm12034    | 0,83 | No  |
| ENSMUSG00000083879 | -9,04E-02 | 2,815627751  | 5,91E-01  | 4,42E-01 | 7,34E-01 | Gm14038    | 0,94 | No  |
| ENSMUSG00000083885 | 2,87E-01  | -2,711757995 | 8,33E-02  | 7,73E-01 | 9,44E-01 | Gm13213    | 1,22 | No  |
| ENSMUSG00000083888 | -6,96E-01 | -0,587164195 | 3,21E+00  | 7,33E-02 | 3,44E-01 | Gm12441    | 0,62 | No  |
| ENSMUSG00000083890 | -2,69E-02 | 4,151095652  | 9,79E-02  | 7,54E-01 | 9,34E-01 | Gm15703    | 0,98 | No  |
| ENSMUSG00000083899 | -8,13E-03 | 7,177781774  | 1,83E-02  | 8,92E-01 | 1,00E+00 | Gm12346    | 0,99 | No  |
| ENSMUSG00000083900 | -7,58E-01 | 0,049732045  | 6,38E+00  | 1,15E-02 | 1,03E-01 | Gm13294    | 0,59 | No  |
| ENSMUSG00000083902 | -5,58E-02 | 6,458503258  | 7,85E-01  | 3,76E-01 | 6,76E-01 | Gm15975    | 0,96 | No  |
| ENSMUSG00000083903 | -2,66E-01 | -1,146059985 | 2,64E-01  | 6,07E-01 | 8,50E-01 | Gm5405     | 0,83 | No  |
| ENSMUSG00000083907 | 1,05E-01  | 3,293026656  | 9,96E-01  | 3,18E-01 | 6,19E-01 | Plk-ps1    | 1,08 | No  |
| ENSMUSG00000083909 | -1,77E+00 | -1,627481468 | 7,54E+00  | 6,05E-03 | 6,46E-02 | Gm15842    | 0,29 | No  |
| ENSMUSG00000083910 | -1,87E+00 | -3,107637761 | 1,39E+00  | 2,38E-01 | 5,50E-01 | Gm13604    | 0,27 | No  |
| ENSMUSG00000083911 | -4,54E-01 | 2,058853587  | 9,59E+00  | 1,95E-03 | 2,75E-02 | Gm4342     | 0,73 | Yes |
| ENSMUSG00000083914 | -2,40E-01 | 2,770115352  | 4,13E+00  | 4,21E-02 | 2,44E-01 | Rps18-ps1  | 0,85 | No  |
| ENSMUSG00000083915 | -1,87E+00 | -3,107637761 | 1,39E+00  | 2,38E-01 | 5,50E-01 | Gm13932    | 0,27 | No  |
| ENSMUSG00000083921 | 1,89E+00  | -2,96320077  | 1,38E+00  | 2,40E-01 | 5,50E-01 | Gm15750    | 3,71 | No  |
| ENSMUSG00000083922 | -1,91E+00 | -2,963238542 | 1,45E+00  | 2,29E-01 | 5,50E-01 | Gm3835     | 0,27 | No  |
| ENSMUSG00000083929 | -1,14E-02 | -3,033635021 | 1,50E-05  | 9,97E-01 | 1,00E+00 | Gm10600    | 0,99 | No  |
| ENSMUSG00000083930 | -5,41E-02 | 2,84658814   | 2,13E-01  | 6,45E-01 | 8,73E-01 | Gm13042    | 0,96 | No  |
| ENSMUSG00000083937 | -3,08E-02 | 4,499091896  | 1,47E-01  | 7,01E-01 | 9,05E-01 | Cct3-ps1   | 0,98 | No  |
| ENSMUSG00000083943 | 2,78E-01  | -1,14604531  | 3,85E-01  | 5,35E-01 | 8,07E-01 | Gm11483    | 1,21 | No  |
| ENSMUSG00000083951 | -8,48E-01 | -2,832023561 | 3,94E-01  | 5,30E-01 | 8,05E-01 | Gm13786    | 0,56 | No  |
| ENSMUSG00000083953 | -1,83E-01 | 0,15990649   | 4,68E-01  | 4,94E-01 | 7,79E-01 | Gm14049    | 0,88 | No  |
| ENSMUSG00000083956 | -1,87E+00 | -3,107637761 | 1,39E+00  | 2,38E-01 | 5,50E-01 | Gm12361    | 0,27 | No  |
| ENSMUSG00000083961 | 1,19E+00  | -3,070179505 | 6,63E-01  | 4,15E-01 | 7,11E-01 | Gm13725    | 2,28 | No  |
| ENSMUSG00000083962 | 1,18E-01  | -0,015438767 | 1,33E-01  | 7,15E-01 | 9,12E-01 | Gm15707    | 1,09 | No  |
| ENSMUSG00000083964 | -1,42E-01 | -0,175594986 | 2,06E-01  | 6,50E-01 | 8,76E-01 | Gm14122    | 0,91 | No  |
| ENSMUSG00000083974 | 1,90E+00  | -2,10768527  | 4,40E+00  | 3,60E-02 | 2,25E-01 | Gm16053    | 3,74 | No  |

|                    |           |              |           |          |          |           |      |     |
|--------------------|-----------|--------------|-----------|----------|----------|-----------|------|-----|
| ENSMUSG00000083976 | 1,13E+00  | -2,49756505  | 1,22E+00  | 2,69E-01 | 5,66E-01 | Gm13664   | 2,19 | No  |
| ENSMUSG00000083979 | -5,93E-02 | -2,627659749 | 4,00E-03  | 9,50E-01 | 1,00E+00 | Gm12527   | 0,96 | No  |
| ENSMUSG00000083988 | 9,78E-01  | -2,627679712 | 8,72E-01  | 3,50E-01 | 6,52E-01 | Rps10-ps4 | 1,97 | No  |
| ENSMUSG00000083989 | 2,61E+00  | -3,033672762 | 2,63E+00  | 1,05E-01 | 3,97E-01 | Gm12607   | 6,10 | No  |
| ENSMUSG00000083990 | 2,08E-01  | -0,793508532 | 2,62E-01  | 6,09E-01 | 8,51E-01 | Gm12101   | 1,16 | No  |
| ENSMUSG00000083992 | -1,68E-01 | 9,214894371  | 8,81E+00  | 2,99E-03 | 3,82E-02 | Gm11478   | 0,89 | Yes |
| ENSMUSG00000083993 | 3,08E-01  | 1,385466581  | 2,75E+00  | 9,74E-02 | 3,90E-01 | Gm14398   | 1,24 | No  |
| ENSMUSG00000083997 | 3,14E-02  | -3,107617333 | -7,69E-10 | 1,00E+00 | 1,00E+00 | Gm12920   | 1,02 | No  |
| ENSMUSG00000083998 | 5,05E-01  | -1,574111224 | 6,41E-01  | 4,23E-01 | 7,18E-01 | Prdx2-rs3 | 1,42 | No  |
| ENSMUSG00000084004 | 2,91E-03  | -1,051725935 | 4,04E-05  | 9,95E-01 | 1,00E+00 | Gm12047   | 1,00 | No  |
| ENSMUSG00000084006 | 8,43E-02  | 2,304431911  | 3,70E-01  | 5,43E-01 | 8,12E-01 | Gm14245   | 1,06 | No  |
| ENSMUSG00000084010 | -1,87E+00 | -3,107637761 | 1,39E+00  | 2,38E-01 | 5,50E-01 | Gm13302   | 0,27 | No  |
| ENSMUSG00000084011 | -1,06E-01 | -3,033634182 | 5,86E-03  | 9,39E-01 | 1,00E+00 | Gm12969   | 0,93 | No  |
| ENSMUSG00000084012 | -3,21E+00 | -2,929285214 | 4,33E+00  | 3,73E-02 | 2,30E-01 | Gm11956   | 0,11 | No  |
| ENSMUSG00000084013 | -1,39E-02 | 5,036239133  | 3,56E-02  | 8,50E-01 | 9,90E-01 | Gm14270   | 0,99 | No  |
| ENSMUSG00000084017 | -8,14E-02 | -2,355575467 | 7,55E-03  | 9,31E-01 | 1,00E+00 | Rpl21-ps9 | 0,95 | No  |
| ENSMUSG00000084018 | 1,09E-02  | -1,268103785 | 4,88E-04  | 9,82E-01 | 1,00E+00 | Gm11895   | 1,01 | No  |
| ENSMUSG00000084020 | 1,08E-01  | 4,081987968  | 1,50E+00  | 2,20E-01 | 5,50E-01 | Wsb2-ps   | 1,08 | No  |
| ENSMUSG00000084021 | -1,94E+00 | -3,107619243 | 1,50E+00  | 2,21E-01 | 5,50E-01 | Gm5832    | 0,26 | No  |
| ENSMUSG00000084024 | -3,14E-01 | -2,268037501 | 1,47E-01  | 7,01E-01 | 9,05E-01 | Gm15937   | 0,80 | No  |
| ENSMUSG00000084028 | -4,98E-02 | -2,401357275 | 3,41E-03  | 9,53E-01 | 1,00E+00 | Gm13983   | 0,97 | No  |
| ENSMUSG00000084032 | 1,82E+00  | -3,033661385 | 1,31E+00  | 2,52E-01 | 5,50E-01 | Gm12991   | 3,54 | No  |
| ENSMUSG00000084033 | -2,20E-01 | -0,36674307  | 4,16E-01  | 5,19E-01 | 7,98E-01 | Gm7645    | 0,86 | No  |
| ENSMUSG00000084038 | 6,24E-01  | 0,483345     | 6,05E+00  | 1,39E-02 | 1,19E-01 | Gm11295   | 1,54 | No  |
| ENSMUSG00000084048 | 9,01E-03  | -3,107646452 | -5,16E-10 | 1,00E+00 | 1,00E+00 | Gm12042   | 1,01 | No  |
| ENSMUSG00000084050 | -5,07E-02 | -2,655102469 | 2,32E-03  | 9,62E-01 | 1,00E+00 | Gm14439   | 0,97 | No  |
| ENSMUSG00000084055 | 2,74E-02  | 0,229541946  | 1,00E-02  | 9,20E-01 | 1,00E+00 | Gm12004   | 1,02 | No  |
| ENSMUSG00000084064 | -1,48E-01 | 1,627342877  | 7,78E-01  | 3,78E-01 | 6,79E-01 | Gm12079   | 0,90 | No  |
| ENSMUSG00000084067 | -1,32E-01 | 4,788213194  | 2,98E+00  | 8,45E-02 | 3,73E-01 | Gm14269   | 0,91 | No  |
| ENSMUSG00000084071 | -3,68E-02 | 1,323943446  | 3,91E-02  | 8,43E-01 | 9,85E-01 | Gm13378   | 0,97 | No  |
| ENSMUSG00000084072 | -6,61E-01 | -3,070161976 | 1,72E-01  | 6,78E-01 | 8,92E-01 | Gm11285   | 0,63 | No  |
| ENSMUSG00000084077 | -5,10E-01 | -1,051767494 | 1,42E+00  | 2,34E-01 | 5,50E-01 | Gm11952   | 0,70 | No  |

|                    |           |              |           |          |          |             |      |    |
|--------------------|-----------|--------------|-----------|----------|----------|-------------|------|----|
| ENSMUSG00000084081 | -2,00E-01 | 0,990949832  | 9,23E-01  | 3,37E-01 | 6,37E-01 | Gm12057     | 0,87 | No |
| ENSMUSG00000084083 | -1,34E-01 | 1,633518761  | 6,32E-01  | 4,27E-01 | 7,21E-01 | Gm15782     | 0,91 | No |
| ENSMUSG00000084085 | -1,22E+00 | -3,146113954 | 6,96E-01  | 4,04E-01 | 7,01E-01 | Gm16140     | 0,43 | No |
| ENSMUSG00000084087 | 1,34E-01  | -2,146155983 | 3,11E-02  | 8,60E-01 | 9,95E-01 | Gm13650     | 1,10 | No |
| ENSMUSG00000084088 | 1,25E+00  | -2,311241476 | 2,14E+00  | 1,43E-01 | 4,79E-01 | Gm12941     | 2,39 | No |
| ENSMUSG00000084093 | 3,77E-02  | 4,801568501  | 2,42E-01  | 6,23E-01 | 8,58E-01 | Gm16418     | 1,03 | No |
| ENSMUSG00000084094 | -1,73E-01 | 3,352040262  | 2,94E+00  | 8,66E-02 | 3,78E-01 | Gm13961     | 0,89 | No |
| ENSMUSG00000084096 | 1,87E+00  | -3,107639691 | 1,38E+00  | 2,40E-01 | 5,50E-01 | Vmn1r-ps135 | 3,67 | No |
| ENSMUSG00000084098 | 5,32E-02  | 5,902640224  | 6,43E-01  | 4,23E-01 | 7,18E-01 | Gm13422     | 1,04 | No |
| ENSMUSG00000084099 | -2,83E-03 | 3,873257948  | 9,47E-04  | 9,75E-01 | 1,00E+00 | Gm12929     | 1,00 | No |
| ENSMUSG00000084104 | 7,07E-02  | 5,24602703   | 9,87E-01  | 3,21E-01 | 6,21E-01 | Gm13578     | 1,05 | No |
| ENSMUSG00000084105 | -1,50E+00 | -2,497536401 | 2,34E+00  | 1,26E-01 | 4,45E-01 | Gm13252     | 0,35 | No |
| ENSMUSG00000084106 | -1,63E-01 | 8,49719109   | 8,09E+00  | 4,45E-03 | 5,11E-02 | Gm6136      | 0,89 | No |
| ENSMUSG00000084107 | -1,14E-02 | -3,033635021 | 1,50E-05  | 9,97E-01 | 1,00E+00 | Gm13700     | 0,99 | No |
| ENSMUSG00000084108 | 9,01E-03  | -3,107646452 | -5,16E-10 | 1,00E+00 | 1,00E+00 | Gm15794     | 1,01 | No |
| ENSMUSG00000084111 | -1,10E-01 | 8,019168419  | 3,59E+00  | 5,81E-02 | 2,97E-01 | Gm15710     | 0,93 | No |
| ENSMUSG00000084113 | 9,85E-02  | 4,128189509  | 1,30E+00  | 2,55E-01 | 5,50E-01 | Gm14277     | 1,07 | No |
| ENSMUSG00000084115 | -1,19E-01 | 0,358647293  | 2,17E-01  | 6,41E-01 | 8,71E-01 | Gm13566     | 0,92 | No |
| ENSMUSG00000084116 | -1,89E+00 | -3,033648118 | 1,42E+00  | 2,33E-01 | 5,50E-01 | Gm12460     | 0,27 | No |
| ENSMUSG00000084120 | -7,52E-01 | -2,497604706 | 6,34E-01  | 4,26E-01 | 7,20E-01 | Gm11624     | 0,59 | No |
| ENSMUSG00000084124 | -1,23E+00 | -2,401383818 | 1,46E+00  | 2,27E-01 | 5,50E-01 | Gm13588     | 0,43 | No |
| ENSMUSG00000084127 | 2,85E-02  | 3,401675957  | 7,49E-02  | 7,84E-01 | 9,51E-01 | Gm13169     | 1,02 | No |
| ENSMUSG00000084128 | 1,73E-01  | 1,21028736   | 8,01E-01  | 3,71E-01 | 6,72E-01 | Esrp2       | 1,13 | No |
| ENSMUSG00000084129 | -1,84E-02 | 1,896103478  | 1,37E-02  | 9,07E-01 | 1,00E+00 | Hmgb1-ps1   | 0,99 | No |
| ENSMUSG00000084132 | 7,39E-01  | -2,832032194 | 2,97E-01  | 5,86E-01 | 8,39E-01 | Gm15982     | 1,67 | No |
| ENSMUSG00000084133 | 1,66E-01  | 3,864064044  | 3,26E+00  | 7,09E-02 | 3,37E-01 | Gm12856     | 1,12 | No |
| ENSMUSG00000084139 | -4,61E-01 | -1,497521388 | 5,66E-01  | 4,52E-01 | 7,42E-01 | Gm12322     | 0,73 | No |
| ENSMUSG00000084140 | 1,11E+00  | -2,448699565 | 1,16E+00  | 2,81E-01 | 5,77E-01 | Gm14000     | 2,15 | No |
| ENSMUSG00000084143 | -2,88E-02 | -2,963268425 | 3,79E-04  | 9,84E-01 | 1,00E+00 | Gm13400     | 0,98 | No |
| ENSMUSG00000084144 | 3,14E-02  | -3,107617333 | -7,69E-10 | 1,00E+00 | 1,00E+00 | Gm12516     | 1,02 | No |
| ENSMUSG00000084145 | -1,49E-01 | 4,691732664  | 3,53E+00  | 6,02E-02 | 3,04E-01 | Gm12263     | 0,90 | No |
| ENSMUSG00000084146 | 8,02E-01  | -2,711742231 | 5,59E-01  | 4,55E-01 | 7,44E-01 | Gm12104     | 1,74 | No |

|                    |           |              |           |          |          |           |      |     |
|--------------------|-----------|--------------|-----------|----------|----------|-----------|------|-----|
| ENSMUSG00000084148 | -1,91E+00 | -1,18541345  | 1,24E+01  | 4,23E-04 | 7,98E-03 | Gm12380   | 0,27 | Yes |
| ENSMUSG00000084149 | -5,85E-02 | 3,163210269  | 2,96E-01  | 5,86E-01 | 8,39E-01 | Gm12944   | 0,96 | No  |
| ENSMUSG00000084153 | 3,47E-02  | 5,057898848  | 2,25E-01  | 6,35E-01 | 8,67E-01 | Gm12186   | 1,02 | No  |
| ENSMUSG00000084154 | 1,24E+00  | -2,655167738 | 9,53E-01  | 3,29E-01 | 6,30E-01 | Gm15644   | 2,36 | No  |
| ENSMUSG00000084159 | -1,12E-01 | 6,207647562  | 3,04E+00  | 8,13E-02 | 3,66E-01 | Gm12696   | 0,93 | No  |
| ENSMUSG00000084164 | -8,10E-01 | -2,963247942 | 3,56E-01  | 5,51E-01 | 8,17E-01 | Gm13902   | 0,57 | No  |
| ENSMUSG00000084168 | 6,94E-03  | 3,115551948  | 4,04E-03  | 9,49E-01 | 1,00E+00 | Atp5l2-ps | 1,00 | No  |
| ENSMUSG00000084169 | -7,49E-02 | -0,963363233 | 2,63E-02  | 8,71E-01 | 1,00E+00 | Gm12240   | 0,95 | No  |
| ENSMUSG00000084170 | -1,12E+00 | -1,226261516 | 4,96E+00  | 2,60E-02 | 1,80E-01 | Gm11954   | 0,46 | No  |
| ENSMUSG00000084175 | -1,89E+00 | -3,033648118 | 1,42E+00  | 2,33E-01 | 5,50E-01 | Gm11372   | 0,27 | No  |
| ENSMUSG00000084178 | 6,10E-01  | -2,600723232 | 4,15E-01  | 5,20E-01 | 7,99E-01 | Gm11759   | 1,53 | No  |
| ENSMUSG00000084183 | -1,41E-01 | 2,954498898  | 1,55E+00  | 2,14E-01 | 5,50E-01 | Gm12009   | 0,91 | No  |
| ENSMUSG00000084190 | 1,63E+00  | -2,600723278 | 1,82E+00  | 1,77E-01 | 5,36E-01 | Gm11869   | 3,10 | No  |
| ENSMUSG00000084192 | -7,88E-02 | -2,89616692  | 4,36E-03  | 9,47E-01 | 1,00E+00 | Gm13282   | 0,95 | No  |
| ENSMUSG00000084195 | -1,36E+00 | -2,355547885 | 1,16E+00  | 2,82E-01 | 5,78E-01 | Gm15372   | 0,39 | No  |
| ENSMUSG00000084198 | 2,67E+00  | -3,033636951 | 2,76E+00  | 9,68E-02 | 3,88E-01 | Gm13711   | 6,36 | No  |
| ENSMUSG00000084199 | -2,72E+00 | -2,711756211 | 2,92E+00  | 8,75E-02 | 3,78E-01 | Gm12422   | 0,15 | No  |
| ENSMUSG00000084201 | 3,22E-01  | -1,424975684 | 3,61E-01  | 5,48E-01 | 8,15E-01 | Gm11926   | 1,25 | No  |
| ENSMUSG00000084203 | -2,23E-01 | -2,070191662 | 1,10E-01  | 7,41E-01 | 9,27E-01 | Gm15593   | 0,86 | No  |
| ENSMUSG00000084207 | -5,23E-02 | -2,963267963 | 1,24E-03  | 9,72E-01 | 1,00E+00 | Gm14070   | 0,96 | No  |
| ENSMUSG00000084208 | 1,53E-01  | 2,175754774  | 1,13E+00  | 2,88E-01 | 5,84E-01 | Gm12792   | 1,11 | No  |
| ENSMUSG00000084213 | -9,52E-01 | -2,548223578 | 7,94E-01  | 3,73E-01 | 6,74E-01 | Hspe1-ps5 | 0,52 | No  |
| ENSMUSG00000084215 | 1,94E-01  | 4,070628025  | 4,93E+00  | 2,65E-02 | 1,82E-01 | Gm11814   | 1,14 | No  |
| ENSMUSG00000084217 | -7,38E-02 | -3,033634644 | 2,66E-03  | 9,59E-01 | 1,00E+00 | Gm15488   | 0,95 | No  |
| ENSMUSG00000084218 | 9,01E-03  | -3,107646452 | -5,16E-10 | 1,00E+00 | 1,00E+00 | Gm8145    | 1,01 | No  |
| ENSMUSG00000084220 | 2,70E-01  | 1,512962338  | 2,44E+00  | 1,18E-01 | 4,27E-01 | Gm12387   | 1,21 | No  |
| ENSMUSG00000084221 | 6,07E-02  | 1,162003475  | 1,00E-01  | 7,52E-01 | 9,32E-01 | Hmgb1-ps4 | 1,04 | No  |
| ENSMUSG00000084223 | -9,27E-02 | 1,350373559  | 2,47E-01  | 6,19E-01 | 8,56E-01 | Gm12244   | 0,94 | No  |
| ENSMUSG00000084224 | -2,56E-01 | -1,051732014 | 3,43E-01  | 5,58E-01 | 8,22E-01 | Gm12337   | 0,84 | No  |
| ENSMUSG00000084230 | 4,14E-02  | 3,154507375  | 1,48E-01  | 7,00E-01 | 9,05E-01 | Gm14388   | 1,03 | No  |
| ENSMUSG00000084231 | -1,75E-01 | -1,655191672 | 9,60E-02  | 7,57E-01 | 9,35E-01 | Gm11975   | 0,89 | No  |
| ENSMUSG00000084235 | -2,78E-01 | 5,999167685  | 1,80E+01  | 2,21E-05 | 6,80E-04 | Gm15421   | 0,82 | Yes |

|                    |           |              |           |          |          |             |      |     |
|--------------------|-----------|--------------|-----------|----------|----------|-------------|------|-----|
| ENSMUSG00000084241 | -2,62E-02 | 3,187419795  | 5,85E-02  | 8,09E-01 | 9,65E-01 | Gm13416     | 0,98 | No  |
| ENSMUSG00000084243 | 7,44E-01  | -2,896157547 | 3,02E-01  | 5,83E-01 | 8,38E-01 | Gm13784     | 1,68 | No  |
| ENSMUSG00000084244 | 1,82E+00  | -3,033667329 | 1,31E+00  | 2,52E-01 | 5,50E-01 | Gm14020     | 3,54 | No  |
| ENSMUSG00000084249 | 1,22E+00  | -2,896168849 | 9,19E-01  | 3,38E-01 | 6,38E-01 | Gm12267     | 2,33 | No  |
| ENSMUSG00000084252 | -6,33E-01 | -1,587440054 | 1,13E+00  | 2,89E-01 | 5,84E-01 | Gm12036     | 0,64 | No  |
| ENSMUSG00000084259 | -2,04E-02 | -0,574138816 | 2,97E-03  | 9,57E-01 | 1,00E+00 | Gm12040     | 0,99 | No  |
| ENSMUSG00000084260 | -1,54E-02 | 6,800026868  | 6,27E-02  | 8,02E-01 | 9,62E-01 | Gm12844     | 0,99 | No  |
| ENSMUSG00000084264 | 1,12E+00  | -2,655146038 | 1,19E+00  | 2,76E-01 | 5,73E-01 | Gm14142     | 2,17 | No  |
| ENSMUSG00000084274 | -3,19E-01 | -0,145980179 | 9,75E-01  | 3,24E-01 | 6,24E-01 | Gm12504     | 0,80 | No  |
| ENSMUSG00000084276 | -1,86E+00 | -2,963227946 | 1,40E+00  | 2,36E-01 | 5,50E-01 | Gm8317      | 0,28 | No  |
| ENSMUSG00000084277 | 7,94E-02  | 0,324041876  | 8,24E-02  | 7,74E-01 | 9,45E-01 | Gm11702     | 1,06 | No  |
| ENSMUSG00000084278 | 1,81E+00  | -3,10765737  | 1,28E+00  | 2,58E-01 | 5,50E-01 | Gm12189     | 3,49 | No  |
| ENSMUSG00000084279 | 8,02E-02  | 3,188770122  | 5,51E-01  | 4,58E-01 | 7,47E-01 | Gm13232     | 1,06 | No  |
| ENSMUSG00000084288 | 9,01E-03  | -3,107646452 | -5,16E-10 | 1,00E+00 | 1,00E+00 | Gm5228      | 1,01 | No  |
| ENSMUSG00000084291 | -2,48E-01 | 3,42469786   | 6,04E+00  | 1,40E-02 | 1,20E-01 | Gm6654      | 0,84 | No  |
| ENSMUSG00000084292 | -1,61E-02 | -2,448591388 | 3,00E-04  | 9,86E-01 | 1,00E+00 | Gm13535     | 0,99 | No  |
| ENSMUSG00000084296 | -1,35E+00 | -2,89615366  | 1,14E+00  | 2,85E-01 | 5,82E-01 | Scgb2b25-ps | 0,39 | No  |
| ENSMUSG00000084301 | 1,66E-01  | 3,256545644  | 2,50E+00  | 1,14E-01 | 4,16E-01 | Gm7856      | 1,12 | No  |
| ENSMUSG00000084302 | -4,17E-02 | -2,963202678 | 7,92E-04  | 9,78E-01 | 1,00E+00 | Gm12194     | 0,97 | No  |
| ENSMUSG00000084304 | -1,51E-01 | 5,351773994  | 4,63E+00  | 3,15E-02 | 2,06E-01 | Gm6142      | 0,90 | No  |
| ENSMUSG00000084306 | -1,37E+00 | -2,711706704 | 1,17E+00  | 2,79E-01 | 5,75E-01 | Gm11743     | 0,39 | No  |
| ENSMUSG00000084307 | 5,42E-02  | 0,010503821  | 3,11E-02  | 8,60E-01 | 9,95E-01 | Gm12151     | 1,04 | No  |
| ENSMUSG00000084313 | 1,17E+00  | -3,14612376  | 6,40E-01  | 4,24E-01 | 7,18E-01 | Gm13809     | 2,26 | No  |
| ENSMUSG00000084314 | -2,95E-01 | 4,121344811  | 1,16E+01  | 6,43E-04 | 1,13E-02 | Rps15a-ps3  | 0,82 | Yes |
| ENSMUSG00000084315 | 2,65E+00  | -3,033655087 | 2,73E+00  | 9,86E-02 | 3,91E-01 | Vmn1r-ps128 | 6,30 | No  |
| ENSMUSG00000084319 | -1,08E-01 | 10,66224616  | 3,75E+00  | 5,28E-02 | 2,80E-01 | Tpt1-ps3    | 0,93 | No  |
| ENSMUSG00000084320 | -3,23E+00 | -2,963208994 | 4,41E+00  | 3,57E-02 | 2,24E-01 | Gm14125     | 0,11 | No  |
| ENSMUSG00000084323 | -9,87E-02 | 5,75368405   | 2,16E+00  | 1,42E-01 | 4,76E-01 | Gm14438     | 0,93 | No  |
| ENSMUSG00000084325 | -6,69E-02 | -0,389614955 | 3,95E-02  | 8,43E-01 | 9,85E-01 | Gm15550     | 0,95 | No  |
| ENSMUSG00000084328 | -2,36E-01 | 0,882843029  | 1,30E+00  | 2,54E-01 | 5,50E-01 | Gm14046     | 0,85 | No  |
| ENSMUSG00000084329 | -7,25E-03 | 5,651473213  | 1,14E-02  | 9,15E-01 | 1,00E+00 | Gm6733      | 0,99 | No  |
| ENSMUSG00000084333 | -1,25E-01 | 1,819556452  | 6,29E-01  | 4,28E-01 | 7,22E-01 | Gm11599     | 0,92 | No  |



|                    |           |              |           |          |          |               |      |     |
|--------------------|-----------|--------------|-----------|----------|----------|---------------|------|-----|
| ENSMUSG00000084334 | 2,01E-01  | -0,175648945 | 4,00E-01  | 5,27E-01 | 8,04E-01 | Gm13494       | 1,15 | No  |
| ENSMUSG00000084338 | 2,24E-01  | 1,326776769  | 1,36E+00  | 2,43E-01 | 5,50E-01 | Gm13531       | 1,17 | No  |
| ENSMUSG00000084339 | -8,62E-02 | 1,550329007  | 2,45E-01  | 6,21E-01 | 8,57E-01 | Gm6141        | 0,94 | No  |
| ENSMUSG00000084342 | -3,15E-02 | 4,943000469  | 1,78E-01  | 6,73E-01 | 8,90E-01 | Gm11224       | 0,98 | No  |
| ENSMUSG00000084345 | 6,55E-02  | 2,448069681  | 2,64E-01  | 6,07E-01 | 8,50E-01 | Rpl17-ps4     | 1,05 | No  |
| ENSMUSG00000084347 | -6,14E-02 | 6,116208982  | 8,98E-01  | 3,43E-01 | 6,44E-01 | Akt2-ps       | 0,96 | No  |
| ENSMUSG00000084350 | 1,24E-01  | 5,538698505  | 3,24E+00  | 7,18E-02 | 3,40E-01 | Znf41-ps      | 1,09 | No  |
| ENSMUSG00000084353 | 7,53E-02  | 3,80064036   | 6,52E-01  | 4,20E-01 | 7,15E-01 | Gm15452       | 1,05 | No  |
| ENSMUSG00000084362 | -9,98E-01 | -2,226202514 | 1,54E+00  | 2,15E-01 | 5,50E-01 | 2610024D14Rik | 0,50 | No  |
| ENSMUSG00000084368 | -3,83E-02 | -3,107651936 | -7,91E-11 | 1,00E+00 | 1,00E+00 | Gm11572       | 0,97 | No  |
| ENSMUSG00000084370 | 4,53E-01  | -0,535278652 | 1,48E+00  | 2,24E-01 | 5,50E-01 | Gm15442       | 1,37 | No  |
| ENSMUSG00000084372 | -3,83E-02 | -3,107651936 | -7,91E-11 | 1,00E+00 | 1,00E+00 | Gm13988       | 0,97 | No  |
| ENSMUSG00000084373 | -1,69E+00 | -1,472923008 | 7,86E+00  | 5,05E-03 | 5,63E-02 | Rps2-ps4      | 0,31 | No  |
| ENSMUSG00000084377 | 2,61E-01  | -1,655141319 | 2,14E-01  | 6,44E-01 | 8,72E-01 | Gm15302       | 1,20 | No  |
| ENSMUSG00000084379 | 1,87E+00  | -3,107639691 | 1,38E+00  | 2,40E-01 | 5,50E-01 | Gm12957       | 3,67 | No  |
| ENSMUSG00000084380 | -1,51E+00 | -2,497595721 | 2,35E+00  | 1,25E-01 | 4,43E-01 | Tmc4-ps       | 0,35 | No  |
| ENSMUSG00000084381 | -7,03E-01 | -0,896072811 | 2,87E+00  | 9,02E-02 | 3,81E-01 | AA413626      | 0,61 | No  |
| ENSMUSG00000084383 | -2,20E-01 | 6,136283869  | 1,16E+01  | 6,52E-04 | 1,14E-02 | Gm13370       | 0,86 | Yes |
| ENSMUSG00000084384 | 5,60E-02  | 5,53251743   | 6,61E-01  | 4,16E-01 | 7,11E-01 | Gm12251       | 1,04 | No  |
| ENSMUSG00000084390 | -3,64E-01 | 3,47401304   | 1,36E+01  | 2,27E-04 | 4,83E-03 | Gm15425       | 0,78 | Yes |
| ENSMUSG00000084391 | 1,85E+00  | -3,107657832 | 1,35E+00  | 2,46E-01 | 5,50E-01 | Gm13967       | 3,61 | No  |
| ENSMUSG00000084399 | -2,94E-01 | -2,401397399 | 1,29E-01  | 7,20E-01 | 9,15E-01 | Gm15666       | 0,82 | No  |
| ENSMUSG00000084400 | 7,35E-01  | -2,896146969 | 2,94E-01  | 5,87E-01 | 8,40E-01 | Gm11576       | 1,66 | No  |
| ENSMUSG00000084403 | -8,07E-01 | -2,831983513 | 3,58E-01  | 5,50E-01 | 8,17E-01 | Rps15a-ps8    | 0,57 | No  |
| ENSMUSG00000084404 | -5,88E-02 | -3,033616507 | 1,62E-03  | 9,68E-01 | 1,00E+00 | Gm12513       | 0,96 | No  |
| ENSMUSG00000084407 | 2,67E-01  | 0,875762279  | 1,50E+00  | 2,20E-01 | 5,50E-01 | Gm14018       | 1,20 | No  |
| ENSMUSG00000084408 | -3,81E-01 | 2,257099188  | 7,50E+00  | 6,18E-03 | 6,56E-02 | Gm11870       | 0,77 | No  |
| ENSMUSG00000084411 | -3,83E-02 | -3,107651936 | -7,91E-11 | 1,00E+00 | 1,00E+00 | Gm11510       | 0,97 | No  |
| ENSMUSG00000084412 | -3,83E-02 | -3,107651936 | -7,91E-11 | 1,00E+00 | 1,00E+00 | Gm12044       | 0,97 | No  |
| ENSMUSG00000084413 | 9,13E-02  | -0,165843292 | 8,57E-02  | 7,70E-01 | 9,42E-01 | Gm12017       | 1,07 | No  |
| ENSMUSG00000084415 | 1,26E+00  | -2,770618981 | 9,92E-01  | 3,19E-01 | 6,20E-01 | Gm12837       | 2,40 | No  |
| ENSMUSG00000084416 | -1,18E-01 | 8,792236537  | 4,28E+00  | 3,85E-02 | 2,33E-01 | Rpl10a-ps1    | 0,92 | No  |

|                    |           |              |          |          |          |          |      |    |
|--------------------|-----------|--------------|----------|----------|----------|----------|------|----|
| ENSMUSG00000084419 | -8,07E-01 | -2,832006272 | 3,57E-01 | 5,50E-01 | 8,17E-01 | Gm22275  | 0,57 | No |
| ENSMUSG00000084422 | 2,15E-01  | -1,740855822 | 1,18E-01 | 7,31E-01 | 9,22E-01 | Gm25108  | 1,16 | No |
| ENSMUSG00000084423 | -3,88E-03 | -3,03362684  | 4,02E-12 | 1,00E+00 | 1,00E+00 | Gm25109  | 1,00 | No |
| ENSMUSG00000084425 | -6,30E-02 | -2,497654528 | 4,55E-03 | 9,46E-01 | 1,00E+00 | Gm25104  | 0,96 | No |
| ENSMUSG00000084433 | -2,69E-01 | -0,146057796 | 7,51E-01 | 3,86E-01 | 6,87E-01 | Gm25945  | 0,83 | No |
| ENSMUSG00000084437 | -1,87E+00 | -3,03364178  | 1,41E+00 | 2,36E-01 | 5,50E-01 | Gm23428  | 0,27 | No |
| ENSMUSG00000084440 | -1,61E-02 | -0,641273909 | 1,71E-03 | 9,67E-01 | 1,00E+00 | Gm26254  | 0,99 | No |
| ENSMUSG00000084446 | 1,92E+00  | -2,268115271 | 4,48E+00 | 3,43E-02 | 2,18E-01 | n-R5s207 | 3,78 | No |
| ENSMUSG00000084447 | 1,87E+00  | -3,107639691 | 1,38E+00 | 2,40E-01 | 5,50E-01 | Gm26251  | 3,67 | No |
| ENSMUSG00000084453 | 2,90E-02  | -3,070144931 | 3,20E-11 | 1,00E+00 | 1,00E+00 | Gm24596  | 1,02 | No |
| ENSMUSG00000084454 | 2,61E+00  | -3,033672762 | 2,63E+00 | 1,05E-01 | 3,97E-01 | Gm24592  | 6,10 | No |
| ENSMUSG00000084457 | -4,07E-01 | -2,711739256 | 1,68E-01 | 6,82E-01 | 8,94E-01 | n-R5s73  | 0,75 | No |
| ENSMUSG00000084458 | -3,74E-01 | -1,460691674 | 4,15E-01 | 5,20E-01 | 7,99E-01 | Mir1907  | 0,77 | No |
| ENSMUSG00000084462 | 2,63E+00  | -2,998018459 | 2,68E+00 | 1,02E-01 | 3,94E-01 | n-R5s154 | 6,20 | No |
| ENSMUSG00000084466 | -5,47E-03 | -2,963221188 | 1,50E-05 | 9,97E-01 | 1,00E+00 | Gm22960  | 1,00 | No |
| ENSMUSG00000084469 | -1,87E+00 | -3,033619006 | 1,41E+00 | 2,36E-01 | 5,50E-01 | Gm22956  | 0,27 | No |
| ENSMUSG00000084472 | -5,14E-02 | -2,770612208 | 2,33E-03 | 9,61E-01 | 1,00E+00 | n-R5s23  | 0,97 | No |
| ENSMUSG00000084477 | 3,05E-01  | -1,997916957 | 9,51E-02 | 7,58E-01 | 9,35E-01 | Gm25780  | 1,24 | No |
| ENSMUSG00000084493 | -5,88E-02 | -2,896098572 | 1,55E-03 | 9,69E-01 | 1,00E+00 | Gm22106  | 0,96 | No |
| ENSMUSG00000084497 | 5,48E-02  | -0,946046949 | 1,68E-02 | 8,97E-01 | 1,00E+00 | Gm22107  | 1,04 | No |
| ENSMUSG00000084504 | -3,97E-01 | -2,896156072 | 9,70E-02 | 7,56E-01 | 9,34E-01 | Gm25323  | 0,76 | No |
| ENSMUSG00000084505 | -7,18E-01 | -3,070161557 | 2,09E-01 | 6,48E-01 | 8,75E-01 | Gm25322  | 0,61 | No |
| ENSMUSG00000084507 | 3,61E-01  | -0,300475981 | 1,22E+00 | 2,69E-01 | 5,65E-01 | Gm25321  | 1,28 | No |
| ENSMUSG00000084513 | -1,89E+00 | -3,1076441   | 1,42E+00 | 2,33E-01 | 5,50E-01 | n-R5s179 | 0,27 | No |
| ENSMUSG00000084514 | 1,14E-01  | 0,042370529  | 1,57E-01 | 6,92E-01 | 9,00E-01 | Mir1893  | 1,08 | No |
| ENSMUSG00000084516 | 1,80E-01  | 1,46108056   | 1,03E+00 | 3,11E-01 | 6,11E-01 | Mir1902  | 1,13 | No |
| ENSMUSG00000084519 | 9,89E-02  | 0,045332351  | 1,10E-01 | 7,40E-01 | 9,26E-01 | Gm22478  | 1,07 | No |
| ENSMUSG00000084522 | -4,01E-02 | -2,711715319 | 1,12E-03 | 9,73E-01 | 1,00E+00 | Gm25819  | 0,97 | No |
| ENSMUSG00000084523 | -1,66E-01 | 1,112271773  | 6,96E-01 | 4,04E-01 | 7,01E-01 | Mir1903  | 0,89 | No |
| ENSMUSG00000084526 | 1,81E+00  | -2,896148908 | 1,31E+00 | 2,53E-01 | 5,50E-01 | n-R5s192 | 3,51 | No |
| ENSMUSG00000084539 | -1,89E+00 | -3,1076441   | 1,42E+00 | 2,33E-01 | 5,50E-01 | Gm25842  | 0,27 | No |
| ENSMUSG00000084543 | 4,69E-01  | -2,600674666 | 1,71E-01 | 6,79E-01 | 8,93E-01 | Gm23184  | 1,38 | No |

|                    |           |              |           |          |          |          |       |     |
|--------------------|-----------|--------------|-----------|----------|----------|----------|-------|-----|
| ENSMUSG00000084544 | -4,73E-01 | -2,146067077 | 4,13E-01  | 5,21E-01 | 7,99E-01 | Gm23183  | 0,72  | No  |
| ENSMUSG00000084547 | -3,83E-02 | -3,107651936 | -7,91E-11 | 1,00E+00 | 1,00E+00 | Gm24936  | 0,97  | No  |
| ENSMUSG00000084552 | -3,21E+00 | -2,831944582 | 4,33E+00  | 3,73E-02 | 2,30E-01 | Gm24840  | 0,11  | No  |
| ENSMUSG00000084557 | 2,59E+00  | -2,963287563 | 2,60E+00  | 1,07E-01 | 3,99E-01 | Gm25279  | 6,03  | No  |
| ENSMUSG00000084558 | 1,87E+00  | -3,107639691 | 1,38E+00  | 2,40E-01 | 5,50E-01 | Gm24836  | 3,67  | No  |
| ENSMUSG00000084562 | 2,15E-01  | -2,268109486 | 5,79E-02  | 8,10E-01 | 9,66E-01 | n-R5s39  | 1,16  | No  |
| ENSMUSG00000084565 | 8,80E-01  | -1,416902036 | 2,63E+00  | 1,05E-01 | 3,97E-01 | Mir1901  | 1,84  | No  |
| ENSMUSG00000084566 | -1,92E+00 | -2,896164745 | 1,46E+00  | 2,27E-01 | 5,50E-01 | Gm26477  | 0,26  | No  |
| ENSMUSG00000084571 | -3,00E-02 | -2,832010318 | 4,82E-04  | 9,82E-01 | 1,00E+00 | n-R5s201 | 0,98  | No  |
| ENSMUSG00000084572 | -1,89E+00 | -3,033648118 | 1,42E+00  | 2,33E-01 | 5,50E-01 | Gm23657  | 0,27  | No  |
| ENSMUSG00000084582 | -7,38E-02 | -3,033634644 | 2,66E-03  | 9,59E-01 | 1,00E+00 | Gm25178  | 0,95  | No  |
| ENSMUSG00000084583 | 1,21E+00  | -3,033635275 | 6,74E-01  | 4,12E-01 | 7,07E-01 | Gm25177  | 2,31  | No  |
| ENSMUSG00000084587 | 4,27E+00  | -2,655159919 | 9,37E+00  | 2,20E-03 | 3,02E-02 | n-R5s174 | 19,25 | Yes |
| ENSMUSG00000084590 | 2,09E-01  | 0,372249908  | 7,17E-01  | 3,97E-01 | 6,97E-01 | Mir1896  | 1,16  | No  |
| ENSMUSG00000084592 | 4,50E-02  | -0,226311852 | 2,10E-02  | 8,85E-01 | 1,00E+00 | Mir1898  | 1,03  | No  |
| ENSMUSG00000084593 | -5,47E-03 | -2,963221188 | 1,50E-05  | 9,97E-01 | 1,00E+00 | Gm22345  | 1,00  | No  |
| ENSMUSG00000084597 | -3,83E-02 | -3,107651936 | -7,91E-11 | 1,00E+00 | 1,00E+00 | Gm22343  | 0,97  | No  |
| ENSMUSG00000084600 | -3,18E-01 | -2,205813091 | 1,51E-01  | 6,97E-01 | 9,03E-01 | Gm22201  | 0,80  | No  |
| ENSMUSG00000084601 | -3,15E-01 | -2,268104699 | 1,49E-01  | 7,00E-01 | 9,04E-01 | Gm23111  | 0,80  | No  |
| ENSMUSG00000084603 | -5,15E-01 | 0,458547874  | 3,88E+00  | 4,87E-02 | 2,66E-01 | Gm22204  | 0,70  | No  |
| ENSMUSG00000084607 | -9,25E-01 | -2,548214707 | 7,49E-01  | 3,87E-01 | 6,87E-01 | Gm22208  | 0,53  | No  |
| ENSMUSG00000084613 | 2,06E-02  | -3,146103739 | -9,26E-10 | 1,00E+00 | 1,00E+00 | n-R5s164 | 1,01  | No  |
| ENSMUSG00000084624 | -6,14E-01 | -2,37831051  | 5,13E-01  | 4,74E-01 | 7,62E-01 | n-R5s189 | 0,65  | No  |
| ENSMUSG00000084625 | 7,32E-01  | -2,600653462 | 2,92E-01  | 5,89E-01 | 8,41E-01 | Gm25544  | 1,66  | No  |
| ENSMUSG00000084628 | 3,16E+00  | -2,896172123 | 4,07E+00  | 4,38E-02 | 2,49E-01 | Gm22613  | 8,92  | No  |
| ENSMUSG00000084632 | 1,42E-01  | -1,574170988 | 6,56E-02  | 7,98E-01 | 9,59E-01 | Gm23887  | 1,10  | No  |
| ENSMUSG00000084641 | -1,87E+00 | -3,033619006 | 1,41E+00  | 2,36E-01 | 5,50E-01 | n-R5s21  | 0,27  | No  |
| ENSMUSG00000084642 | -2,65E+00 | -3,033633091 | 2,78E+00  | 9,55E-02 | 3,86E-01 | Gm24384  | 0,16  | No  |
| ENSMUSG00000084644 | 2,53E-01  | -1,522685968 | 2,16E-01  | 6,42E-01 | 8,71E-01 | Gm24379  | 1,19  | No  |
| ENSMUSG00000084648 | -1,05E-01 | -2,070212857 | 1,50E-02  | 9,03E-01 | 1,00E+00 | Gm24378  | 0,93  | No  |
| ENSMUSG00000084649 | -1,02E-01 | -2,770578514 | 7,05E-03  | 9,33E-01 | 1,00E+00 | n-R5s76  | 0,93  | No  |
| ENSMUSG00000084651 | -2,36E+00 | -2,998012052 | 2,18E+00  | 1,40E-01 | 4,72E-01 | Mir1904  | 0,19  | No  |

|                    |           |              |          |          |          |               |      |    |
|--------------------|-----------|--------------|----------|----------|----------|---------------|------|----|
| ENSMUSG00000084658 | -4,95E-01 | -0,372408294 | 1,98E+00 | 1,59E-01 | 5,07E-01 | Gm22721       | 0,71 | No |
| ENSMUSG00000084659 | -1,13E-01 | -2,963254935 | 5,86E-03 | 9,39E-01 | 1,00E+00 | Gm22720       | 0,92 | No |
| ENSMUSG00000084667 | -2,20E-03 | 0,744200891  | 9,18E-05 | 9,92E-01 | 1,00E+00 | Gm23212       | 1,00 | No |
| ENSMUSG00000084669 | 1,87E+00  | -3,107639691 | 1,38E+00 | 2,40E-01 | 5,50E-01 | Gm23206       | 3,67 | No |
| ENSMUSG00000084674 | 3,13E+00  | -2,896142102 | 3,99E+00 | 4,58E-02 | 2,55E-01 | Gm26027       | 8,74 | No |
| ENSMUSG00000084686 | -1,46E+00 | -1,641229974 | 5,85E+00 | 1,55E-02 | 1,29E-01 | Gm22027       | 0,36 | No |
| ENSMUSG00000084693 | -1,94E+00 | -3,107619243 | 1,50E+00 | 2,21E-01 | 5,50E-01 | Gm24894       | 0,26 | No |
| ENSMUSG00000084694 | 1,84E+00  | -3,033649193 | 1,33E+00 | 2,49E-01 | 5,50E-01 | Gm24893       | 3,58 | No |
| ENSMUSG00000084701 | 7,28E-01  | -2,83202549  | 2,89E-01 | 5,91E-01 | 8,41E-01 | n-R5s87       | 1,66 | No |
| ENSMUSG00000084708 | 6,26E-03  | 1,828215324  | 1,54E-03 | 9,69E-01 | 1,00E+00 | Gm22988       | 1,00 | No |
| ENSMUSG00000084711 | -7,74E-01 | -1,711688877 | 1,77E+00 | 1,84E-01 | 5,47E-01 | Gm24629       | 0,58 | No |
| ENSMUSG00000084717 | 1,85E+00  | -3,107657832 | 1,35E+00 | 2,46E-01 | 5,50E-01 | Gm24630       | 3,61 | No |
| ENSMUSG00000084728 | -1,35E+00 | -2,896126553 | 1,15E+00 | 2,84E-01 | 5,80E-01 | Mir1905       | 0,39 | No |
| ENSMUSG00000084729 | 1,50E-01  | -2,226342502 | 3,92E-02 | 8,43E-01 | 9,85E-01 | Gm24139       | 1,11 | No |
| ENSMUSG00000084734 | -1,87E+00 | -3,107637761 | 1,39E+00 | 2,38E-01 | 5,50E-01 | Gm25804       | 0,27 | No |
| ENSMUSG00000084738 | 2,61E+00  | -2,770638576 | 2,64E+00 | 1,04E-01 | 3,97E-01 | Gm25809       | 6,10 | No |
| ENSMUSG00000084739 | -1,94E+00 | -3,107619243 | 1,50E+00 | 2,21E-01 | 5,50E-01 | Gm22067       | 0,26 | No |
| ENSMUSG00000084744 | -6,88E-02 | -2,107590905 | 8,78E-03 | 9,25E-01 | 1,00E+00 | Gm25291       | 0,95 | No |
| ENSMUSG00000084745 | -8,34E-01 | -2,963223097 | 3,81E-01 | 5,37E-01 | 8,09E-01 | Gm25290       | 0,56 | No |
| ENSMUSG00000084749 | -1,72E+00 | -2,60063458  | 2,06E+00 | 1,51E-01 | 4,92E-01 | Gm25288       | 0,30 | No |
| ENSMUSG00000084751 | 8,29E-02  | -1,929253989 | 1,52E-02 | 9,02E-01 | 1,00E+00 | Mir1894       | 1,06 | No |
| ENSMUSG00000084755 | -1,54E-01 | 2,052900424  | 1,00E+00 | 3,16E-01 | 6,17E-01 | Gm16276       | 0,90 | No |
| ENSMUSG00000084756 | 1,82E+00  | -2,963253027 | 1,31E+00 | 2,52E-01 | 5,50E-01 | Gm13881       | 3,53 | No |
| ENSMUSG00000084758 | 2,65E+00  | -2,896119006 | 2,71E+00 | 9,98E-02 | 3,92E-01 | Gm12798       | 6,28 | No |
| ENSMUSG00000084760 | 1,11E-02  | -1,289434094 | 5,07E-04 | 9,82E-01 | 1,00E+00 | Gm15472       | 1,01 | No |
| ENSMUSG00000084766 | -2,75E+00 | -2,963216826 | 2,99E+00 | 8,38E-02 | 3,71E-01 | Gm12714       | 0,15 | No |
| ENSMUSG00000084769 | -3,64E-01 | 0,103895898  | 1,84E+00 | 1,75E-01 | 5,33E-01 | Gm12061       | 0,78 | No |
| ENSMUSG00000084772 | -2,49E-02 | 0,32598857   | 9,43E-03 | 9,23E-01 | 1,00E+00 | Gm15473       | 0,98 | No |
| ENSMUSG00000084773 | 1,58E-01  | -1,683034409 | 7,59E-02 | 7,83E-01 | 9,50E-01 | Gm12159       | 1,12 | No |
| ENSMUSG00000084775 | -1,87E+00 | -3,107637761 | 1,39E+00 | 2,38E-01 | 5,50E-01 | Gm16741       | 0,27 | No |
| ENSMUSG00000084780 | -3,03E-01 | 2,839648367  | 6,64E+00 | 9,98E-03 | 9,32E-02 | Gm15350       | 0,81 | No |
| ENSMUSG00000084781 | -1,15E-01 | -0,2367756   | 1,13E-01 | 7,36E-01 | 9,25E-01 | D930015M05Rik | 0,92 | No |

|                    |           |              |          |          |          |               |      |     |
|--------------------|-----------|--------------|----------|----------|----------|---------------|------|-----|
| ENSMUSG00000084782 | -2,45E-01 | -1,963129994 | 1,04E-01 | 7,47E-01 | 9,30E-01 | Gm11213       | 0,84 | No  |
| ENSMUSG00000084783 | 1,85E+00  | -3,107657832 | 1,35E+00 | 2,46E-01 | 5,50E-01 | Gm15419       | 3,61 | No  |
| ENSMUSG00000084786 | -2,27E-01 | 4,95378773   | 9,27E+00 | 2,33E-03 | 3,16E-02 | Ubl5          | 0,85 | Yes |
| ENSMUSG00000084790 | 4,07E-02  | -0,548236419 | 1,30E-02 | 9,09E-01 | 1,00E+00 | Gm15879       | 1,03 | No  |
| ENSMUSG00000084792 | -7,72E-01 | 0,199431559  | 7,31E+00 | 6,85E-03 | 7,06E-02 | 1700056N10Rik | 0,59 | No  |
| ENSMUSG00000084796 | -7,37E-01 | 3,814113288  | 6,37E+01 | 1,46E-15 | 2,36E-13 | Mir142hg      | 0,60 | Yes |
| ENSMUSG00000084797 | -2,64E-01 | -0,205677776 | 6,15E-01 | 4,33E-01 | 7,26E-01 | Gm14321       | 0,83 | No  |
| ENSMUSG00000084798 | -3,85E-01 | -1,800932041 | 3,44E-01 | 5,57E-01 | 8,21E-01 | 4930533B01Rik | 0,77 | No  |
| ENSMUSG00000084799 | -2,57E-02 | 2,633018544  | 4,22E-02 | 8,37E-01 | 9,81E-01 | Ino80dos      | 0,98 | No  |
| ENSMUSG00000084800 | -2,05E+00 | -2,548244799 | 3,19E+00 | 7,40E-02 | 3,46E-01 | Gm12205       | 0,24 | No  |
| ENSMUSG00000084803 | 2,05E-01  | 0,0451775    | 5,11E-01 | 4,75E-01 | 7,63E-01 | 5830444B04Rik | 1,15 | No  |
| ENSMUSG00000084804 | -3,93E-02 | -2,896146176 | 7,35E-04 | 9,78E-01 | 1,00E+00 | 1700095J12Rik | 0,97 | No  |
| ENSMUSG00000084805 | 1,87E+00  | -3,107639691 | 1,38E+00 | 2,40E-01 | 5,50E-01 | Gm12273       | 3,67 | No  |
| ENSMUSG00000084807 | -5,88E-02 | -3,033652696 | 1,62E-03 | 9,68E-01 | 1,00E+00 | Gm13073       | 0,96 | No  |
| ENSMUSG00000084808 | 2,52E-01  | 2,350054445  | 3,55E+00 | 5,94E-02 | 3,02E-01 | 9430091E24Rik | 1,19 | No  |
| ENSMUSG00000084809 | -1,35E+00 | -2,89615366  | 1,14E+00 | 2,85E-01 | 5,82E-01 | Gm12631       | 0,39 | No  |
| ENSMUSG00000084816 | 3,14E+00  | -2,832051852 | 4,02E+00 | 4,49E-02 | 2,53E-01 | Platr29       | 8,81 | No  |
| ENSMUSG00000084817 | -1,31E-01 | 8,232770188  | 5,13E+00 | 2,35E-02 | 1,68E-01 | Gm5526        | 0,91 | No  |
| ENSMUSG00000084821 | -2,03E-01 | 1,438580247  | 1,22E+00 | 2,70E-01 | 5,66E-01 | Gm15880       | 0,87 | No  |
| ENSMUSG00000084823 | -8,17E-01 | -2,627653655 | 6,67E-01 | 4,14E-01 | 7,10E-01 | Gm17216       | 0,57 | No  |
| ENSMUSG00000084824 | -1,22E+00 | -2,655080939 | 1,42E+00 | 2,33E-01 | 5,50E-01 | Gm16344       | 0,43 | No  |
| ENSMUSG00000084825 | 2,62E+00  | -3,033654625 | 2,66E+00 | 1,03E-01 | 3,95E-01 | 2410152P15Rik | 6,16 | No  |
| ENSMUSG00000084826 | 1,43E-01  | -1,378385269 | 7,16E-02 | 7,89E-01 | 9,54E-01 | AI847159      | 1,10 | No  |
| ENSMUSG00000084828 | -3,41E-01 | -2,863722815 | 8,54E-02 | 7,70E-01 | 9,42E-01 | Gm12367       | 0,79 | No  |
| ENSMUSG00000084833 | 1,87E+00  | -3,107639691 | 1,38E+00 | 2,40E-01 | 5,50E-01 | Gm12649       | 3,67 | No  |
| ENSMUSG00000084834 | -2,49E-01 | 2,53400609   | 3,69E+00 | 5,48E-02 | 2,87E-01 | 4930565N06Rik | 0,84 | No  |
| ENSMUSG00000084835 | 8,78E-02  | 3,199586111  | 6,57E-01 | 4,18E-01 | 7,13E-01 | Gm12352       | 1,06 | No  |
| ENSMUSG00000084837 | -1,87E+00 | -3,070153968 | 1,40E+00 | 2,36E-01 | 5,50E-01 | 1700108N11Rik | 0,27 | No  |
| ENSMUSG00000084838 | -2,27E-01 | 5,411261744  | 1,06E+01 | 1,16E-03 | 1,82E-02 | Gm10241       | 0,85 | Yes |
| ENSMUSG00000084839 | -3,78E-02 | -2,832003524 | 7,08E-04 | 9,79E-01 | 1,00E+00 | Gm14097       | 0,97 | No  |
| ENSMUSG00000084840 | 1,78E+00  | -1,711856358 | 7,93E+00 | 4,86E-03 | 5,48E-02 | Gm11468       | 3,43 | No  |
| ENSMUSG00000084843 | -1,86E+00 | -3,033612668 | 1,39E+00 | 2,38E-01 | 5,50E-01 | B230312C02Rik | 0,28 | No  |

|                    |           |              |           |          |          |               |      |     |
|--------------------|-----------|--------------|-----------|----------|----------|---------------|------|-----|
| ENSMUSG00000084844 | -6,75E-02 | -1,042611404 | 2,39E-02  | 8,77E-01 | 1,00E+00 | Hoxb3os       | 0,95 | No  |
| ENSMUSG00000084845 | -9,24E-01 | 0,237283838  | 1,16E+01  | 6,75E-04 | 1,17E-02 | Tmem240       | 0,53 | Yes |
| ENSMUSG00000084846 | 9,70E-02  | 2,205741743  | 4,95E-01  | 4,82E-01 | 7,69E-01 | A730011C13Rik | 1,07 | No  |
| ENSMUSG00000084847 | 9,01E-03  | -3,107646452 | -5,16E-10 | 1,00E+00 | 1,00E+00 | Gm15507       | 1,01 | No  |
| ENSMUSG00000084848 | -2,24E-02 | -0,289516463 | 4,47E-03  | 9,47E-01 | 1,00E+00 | 4933408N05Rik | 0,98 | No  |
| ENSMUSG00000084849 | -4,05E-01 | -2,070177345 | 3,41E-01  | 5,60E-01 | 8,22E-01 | Gm16105       | 0,76 | No  |
| ENSMUSG00000084850 | 1,87E+00  | -3,03364371  | 1,36E+00  | 2,43E-01 | 5,50E-01 | Gm12092       | 3,66 | No  |
| ENSMUSG00000084855 | -1,87E+00 | -3,107637761 | 1,39E+00  | 2,38E-01 | 5,50E-01 | Gm9850        | 0,27 | No  |
| ENSMUSG00000084858 | 2,34E-01  | -1,89610775  | 1,27E-01  | 7,22E-01 | 9,16E-01 | Gm1980        | 1,18 | No  |
| ENSMUSG00000084860 | -8,15E-01 | -2,832001636 | 3,65E-01  | 5,46E-01 | 8,14E-01 | 2610204G07Rik | 0,57 | No  |
| ENSMUSG00000084862 | 2,19E-02  | 2,356520456  | 2,60E-02  | 8,72E-01 | 1,00E+00 | Gm16278       | 1,02 | No  |
| ENSMUSG00000084863 | 2,03E-01  | 1,002031079  | 9,74E-01  | 3,24E-01 | 6,24E-01 | Gm12523       | 1,15 | No  |
| ENSMUSG00000084864 | -2,38E-01 | 1,613229461  | 2,02E+00  | 1,56E-01 | 5,00E-01 | 1700027A07Rik | 0,85 | No  |
| ENSMUSG00000084866 | -2,80E-01 | -1,070162702 | 3,93E-01  | 5,31E-01 | 8,05E-01 | A930006K02Rik | 0,82 | No  |
| ENSMUSG00000084869 | 5,41E-02  | -2,247048167 | 4,21E-03  | 9,48E-01 | 1,00E+00 | Gm13063       | 1,04 | No  |
| ENSMUSG00000084870 | 6,95E-01  | -2,146130028 | 7,01E-01  | 4,03E-01 | 7,01E-01 | Gm13954       | 1,62 | No  |
| ENSMUSG00000084874 | -7,80E-02 | 4,603075487  | 9,77E-01  | 3,23E-01 | 6,23E-01 | Gm12906       | 0,95 | No  |
| ENSMUSG00000084876 | -1,12E+00 | -2,711746525 | 9,36E-01  | 3,33E-01 | 6,34E-01 | Gm14965       | 0,46 | No  |
| ENSMUSG00000084878 | -5,97E-02 | 2,148163375  | 1,66E-01  | 6,83E-01 | 8,95E-01 | Lrrc8dos      | 0,96 | No  |
| ENSMUSG00000084880 | 8,62E-02  | 3,321205609  | 6,72E-01  | 4,12E-01 | 7,08E-01 | Tomm6os       | 1,06 | No  |
| ENSMUSG00000084881 | 1,54E-01  | 0,442070935  | 3,85E-01  | 5,35E-01 | 8,07E-01 | Gm15585       | 1,11 | No  |
| ENSMUSG00000084883 | 3,12E-01  | 0,344654195  | 1,34E+00  | 2,46E-01 | 5,50E-01 | Ccdc85c       | 1,24 | No  |
| ENSMUSG00000084884 | 4,24E-02  | -3,033592245 | -1,17E-09 | 1,00E+00 | 1,00E+00 | Gm12289       | 1,03 | No  |
| ENSMUSG00000084891 | 2,59E+00  | -2,963293505 | 2,61E+00  | 1,06E-01 | 3,99E-01 | Gm12958       | 6,03 | No  |
| ENSMUSG00000084892 | 4,12E-01  | 1,50992982   | 5,09E+00  | 2,40E-02 | 1,70E-01 | Gm14471       | 1,33 | No  |
| ENSMUSG00000084893 | -6,15E-02 | -1,929267121 | 5,26E-03  | 9,42E-01 | 1,00E+00 | Hba-ps4       | 0,96 | No  |
| ENSMUSG00000084894 | -9,50E-01 | -2,401294538 | 7,90E-01  | 3,74E-01 | 6,75E-01 | Gm13834       | 0,52 | No  |
| ENSMUSG00000084896 | -7,80E-02 | 2,701046424  | 4,23E-01  | 5,15E-01 | 7,97E-01 | Gm11632       | 0,95 | No  |
| ENSMUSG00000084897 | 1,79E+00  | -3,033666867 | 1,28E+00  | 2,58E-01 | 5,50E-01 | Gm14226       | 3,46 | No  |
| ENSMUSG00000084899 | 8,25E-02  | 4,555514964  | 1,06E+00  | 3,03E-01 | 6,00E-01 | Gm15344       | 1,06 | No  |
| ENSMUSG00000084901 | 3,14E-02  | -3,107617333 | -7,69E-10 | 1,00E+00 | 1,00E+00 | Gm13266       | 1,02 | No  |
| ENSMUSG00000084908 | -1,33E+00 | -2,448649313 | 1,12E+00  | 2,91E-01 | 5,86E-01 | C79798        | 0,40 | No  |

|                    |           |              |           |          |          |               |      |     |
|--------------------|-----------|--------------|-----------|----------|----------|---------------|------|-----|
| ENSMUSG00000084910 | 9,03E-01  | -1,185695872 | 3,42E+00  | 6,44E-02 | 3,18E-01 | C630043F03Rik | 1,87 | No  |
| ENSMUSG00000084911 | 1,56E-01  | 2,871077859  | 1,80E+00  | 1,80E-01 | 5,41E-01 | Gm16185       | 1,11 | No  |
| ENSMUSG00000084915 | -1,18E-01 | 0,60452519   | 2,53E-01  | 6,15E-01 | 8,54E-01 | C230037L18Rik | 0,92 | No  |
| ENSMUSG00000084917 | -1,08E-01 | 0,848915704  | 2,44E-01  | 6,22E-01 | 8,57E-01 | Gm17477       | 0,93 | No  |
| ENSMUSG00000084918 | 3,62E-01  | 1,2400284    | 3,67E+00  | 5,55E-02 | 2,89E-01 | Gm12708       | 1,28 | No  |
| ENSMUSG00000084925 | -2,05E-01 | 0,705473502  | 7,82E-01  | 3,77E-01 | 6,78E-01 | 1810062O18Rik | 0,87 | No  |
| ENSMUSG00000084930 | 9,52E-01  | -1,278753826 | 3,54E+00  | 5,98E-02 | 3,03E-01 | Gm11706       | 1,94 | No  |
| ENSMUSG00000084936 | 9,39E-02  | 3,121673267  | 7,54E-01  | 3,85E-01 | 6,86E-01 | Gm11583       | 1,07 | No  |
| ENSMUSG00000084939 | -1,33E+00 | -2,831956329 | 1,11E+00  | 2,92E-01 | 5,87E-01 | Gm830         | 0,40 | No  |
| ENSMUSG00000084940 | -2,01E-01 | -0,834717491 | 2,65E-01  | 6,07E-01 | 8,50E-01 | Gm15935       | 0,87 | No  |
| ENSMUSG00000084941 | 5,13E-01  | -0,871712108 | 1,76E+00  | 1,85E-01 | 5,49E-01 | Gm11944       | 1,43 | No  |
| ENSMUSG00000084946 | 4,80E-01  | -0,221263791 | 2,17E+00  | 1,41E-01 | 4,74E-01 | Dlx1as        | 1,39 | No  |
| ENSMUSG00000084947 | -3,23E+00 | -2,963208994 | 4,41E+00  | 3,57E-02 | 2,24E-01 | Gm15594       | 0,11 | No  |
| ENSMUSG00000084950 | -1,62E-01 | 4,477444146  | 4,01E+00  | 4,52E-02 | 2,54E-01 | Gm5577        | 0,89 | No  |
| ENSMUSG00000084951 | -5,50E-01 | -2,655103745 | 2,37E-01  | 6,26E-01 | 8,60E-01 | Mipepos       | 0,68 | No  |
| ENSMUSG00000084956 | -5,80E-01 | 2,326109476  | 1,85E+01  | 1,73E-05 | 5,44E-04 | Gm16194       | 0,67 | Yes |
| ENSMUSG00000084957 | -6,07E-03 | 4,597432191  | 5,90E-03  | 9,39E-01 | 1,00E+00 | Bbip1         | 1,00 | No  |
| ENSMUSG00000084960 | 1,03E-02  | -1,007131561 | 5,83E-04  | 9,81E-01 | 1,00E+00 | B430010I23Rik | 1,01 | No  |
| ENSMUSG00000084964 | -2,19E-01 | 0,175910741  | 5,76E-01  | 4,48E-01 | 7,38E-01 | Gm15503       | 0,86 | No  |
| ENSMUSG00000084965 | -1,88E+00 | -3,10764093  | 1,41E+00  | 2,35E-01 | 5,50E-01 | Gm13857       | 0,27 | No  |
| ENSMUSG00000084968 | 1,46E-02  | 0,906749392  | 4,75E-03  | 9,45E-01 | 1,00E+00 | Gm12743       | 1,01 | No  |
| ENSMUSG00000084969 | -3,25E-01 | -2,497539106 | 1,32E-01  | 7,16E-01 | 9,13E-01 | Gm11205       | 0,80 | No  |
| ENSMUSG00000084970 | -2,80E-01 | 0,344926634  | 1,09E+00  | 2,96E-01 | 5,92E-01 | 1700060J05Rik | 0,82 | No  |
| ENSMUSG00000084974 | -5,68E-02 | 1,006558117  | 7,29E-02  | 7,87E-01 | 9,53E-01 | Gm15567       | 0,96 | No  |
| ENSMUSG00000084978 | 4,23E-01  | -2,71169387  | 1,39E-01  | 7,09E-01 | 9,09E-01 | Gm11655       | 1,34 | No  |
| ENSMUSG00000084979 | -9,66E-01 | 1,374475331  | 2,91E+01  | 6,99E-08 | 4,03E-06 | Gm16267       | 0,51 | Yes |
| ENSMUSG00000084980 | -1,73E+00 | -2,770598936 | 2,09E+00  | 1,48E-01 | 4,88E-01 | Slc36a1os     | 0,30 | No  |
| ENSMUSG00000084984 | -5,76E-02 | 3,225372688  | 2,92E-01  | 5,89E-01 | 8,41E-01 | Far1os        | 0,96 | No  |
| ENSMUSG00000084985 | -2,84E-01 | -1,770570369 | 2,63E-01  | 6,08E-01 | 8,51E-01 | Gm16135       | 0,82 | No  |
| ENSMUSG00000084986 | 1,35E-01  | 0,877969546  | 3,93E-01  | 5,31E-01 | 8,05E-01 | Gm16224       | 1,10 | No  |
| ENSMUSG00000084989 | 1,08E+00  | -2,18563178  | 1,48E+00  | 2,23E-01 | 5,50E-01 | Crocc2        | 2,11 | No  |
| ENSMUSG00000084992 | 9,01E-03  | -3,107646452 | -5,16E-10 | 1,00E+00 | 1,00E+00 | Gm13842       | 1,01 | No  |

|                    |           |              |           |          |          |               |      |     |
|--------------------|-----------|--------------|-----------|----------|----------|---------------|------|-----|
| ENSMUSG00000084995 | -6,14E-02 | -2,497490511 | 2,54E-03  | 9,60E-01 | 1,00E+00 | Lyzl4os       | 0,96 | No  |
| ENSMUSG00000084996 | 3,61E-01  | -2,863726131 | 6,59E-02  | 7,97E-01 | 9,58E-01 | Gm11419       | 1,28 | No  |
| ENSMUSG00000084997 | -5,03E-03 | 1,95687627   | 1,12E-03  | 9,73E-01 | 1,00E+00 | Gm15471       | 1,00 | No  |
| ENSMUSG00000084998 | -4,80E-02 | 2,755532835  | 1,59E-01  | 6,90E-01 | 8,99E-01 | Gm16279       | 0,97 | No  |
| ENSMUSG00000085002 | -1,86E+00 | -3,033612668 | 1,39E+00  | 2,38E-01 | 5,50E-01 | Gm12984       | 0,28 | No  |
| ENSMUSG00000085003 | 2,59E+00  | -2,963293505 | 2,61E+00  | 1,06E-01 | 3,99E-01 | Pip5k1bos     | 6,03 | No  |
| ENSMUSG00000085004 | -3,17E+00 | -2,896113652 | 4,22E+00  | 4,00E-02 | 2,37E-01 | 5430427M07Rik | 0,11 | No  |
| ENSMUSG00000085006 | -8,75E-01 | -2,226217086 | 1,37E+00  | 2,41E-01 | 5,50E-01 | BC021767      | 0,55 | No  |
| ENSMUSG00000085009 | 1,79E-02  | 1,416008943  | 1,03E-02  | 9,19E-01 | 1,00E+00 | Gm12977       | 1,01 | No  |
| ENSMUSG00000085010 | -2,56E-01 | -2,741415054 | 5,78E-02  | 8,10E-01 | 9,66E-01 | Gssos1        | 0,84 | No  |
| ENSMUSG00000085012 | 6,89E-02  | 1,136451706  | 1,12E-01  | 7,38E-01 | 9,26E-01 | Gm15492       | 1,05 | No  |
| ENSMUSG00000085016 | -3,00E-01 | -2,146137694 | 1,56E-01  | 6,93E-01 | 9,01E-01 | Gm11335       | 0,81 | No  |
| ENSMUSG00000085017 | -3,83E-02 | -3,107651936 | -7,91E-11 | 1,00E+00 | 1,00E+00 | Gm13412       | 0,97 | No  |
| ENSMUSG00000085023 | 2,24E-01  | 4,39153739   | 7,41E+00  | 6,49E-03 | 6,79E-02 | Gm12744       | 1,17 | No  |
| ENSMUSG00000085024 | -1,36E-01 | -1,015592063 | 8,49E-02  | 7,71E-01 | 9,42E-01 | C230035I16Rik | 0,91 | No  |
| ENSMUSG00000085026 | -3,83E-02 | -3,107651936 | -7,91E-11 | 1,00E+00 | 1,00E+00 | Srrm3os       | 0,97 | No  |
| ENSMUSG00000085027 | 1,79E+00  | -3,033666867 | 1,28E+00  | 2,58E-01 | 5,50E-01 | Gm11840       | 3,46 | No  |
| ENSMUSG00000085028 | 2,74E-01  | 1,685798044  | 2,93E+00  | 8,70E-02 | 3,78E-01 | Slc2a4rg-ps   | 1,21 | No  |
| ENSMUSG00000085030 | -2,77E-01 | -0,64126299  | 5,56E-01  | 4,56E-01 | 7,45E-01 | 2810455O05Rik | 0,83 | No  |
| ENSMUSG00000085033 | 9,43E-02  | 1,795173262  | 3,56E-01  | 5,51E-01 | 8,17E-01 | Gm11646       | 1,07 | No  |
| ENSMUSG00000085035 | -3,67E-01 | -1,711549415 | 3,13E-01  | 5,76E-01 | 8,34E-01 | Gm12031       | 0,78 | No  |
| ENSMUSG00000085036 | 2,05E-01  | -2,35552165  | 6,31E-02  | 8,02E-01 | 9,61E-01 | Gm14011       | 1,15 | No  |
| ENSMUSG00000085037 | -3,70E-01 | 1,110117335  | 3,54E+00  | 6,00E-02 | 3,03E-01 | 4933421O10Rik | 0,77 | No  |
| ENSMUSG00000085039 | -1,27E-01 | 2,535022705  | 9,83E-01  | 3,21E-01 | 6,22E-01 | Gm15927       | 0,92 | No  |
| ENSMUSG00000085042 | 2,26E-02  | -0,289377042 | 4,83E-03  | 9,45E-01 | 1,00E+00 | Abhd11os      | 1,02 | No  |
| ENSMUSG00000085043 | 9,51E-02  | -1,424872956 | 3,91E-02  | 8,43E-01 | 9,85E-01 | Gm13184       | 1,07 | No  |
| ENSMUSG00000085048 | -1,58E-02 | -0,305737042 | 2,33E-03  | 9,61E-01 | 1,00E+00 | Gm15537       | 0,99 | No  |
| ENSMUSG00000085051 | -8,79E-01 | -2,770567379 | 4,22E-01  | 5,16E-01 | 7,97E-01 | Gm11542       | 0,54 | No  |
| ENSMUSG00000085054 | -1,32E-01 | -0,200713984 | 1,70E-01  | 6,81E-01 | 8,93E-01 | Gm15834       | 0,91 | No  |
| ENSMUSG00000085055 | -1,23E+00 | -3,146117124 | 7,12E-01  | 3,99E-01 | 6,98E-01 | Gm15958       | 0,42 | No  |
| ENSMUSG00000085057 | 6,87E-01  | 1,208314383  | 1,26E+01  | 3,83E-04 | 7,38E-03 | Gm13415       | 1,61 | Yes |
| ENSMUSG00000085058 | 2,81E-01  | 0,595810982  | 1,29E+00  | 2,55E-01 | 5,50E-01 | 8030453O22Rik | 1,22 | No  |



|                    |           |              |           |          |          |               |      |     |
|--------------------|-----------|--------------|-----------|----------|----------|---------------|------|-----|
| ENSMUSG00000085063 | -1,22E+00 | -2,107572972 | 2,47E+00  | 1,16E-01 | 4,21E-01 | Gm16024       | 0,43 | No  |
| ENSMUSG00000085070 | 1,85E+00  | -3,107657832 | 1,35E+00  | 2,46E-01 | 5,50E-01 | Gm13211       | 3,61 | No  |
| ENSMUSG00000085072 | -8,25E-02 | -1,216112333 | 2,70E-02  | 8,69E-01 | 1,00E+00 | lct1os        | 0,94 | No  |
| ENSMUSG00000085078 | 9,01E-03  | -3,107646452 | -5,16E-10 | 1,00E+00 | 1,00E+00 | C030013C21Rik | 1,01 | No  |
| ENSMUSG00000085080 | 6,39E-01  | -2,548224649 | 3,38E-01  | 5,61E-01 | 8,24E-01 | 2310044K18Rik | 1,56 | No  |
| ENSMUSG00000085081 | -1,25E-01 | -0,662141547 | 1,09E-01  | 7,41E-01 | 9,27E-01 | Rptoros       | 0,92 | No  |
| ENSMUSG00000085083 | 5,97E-03  | -3,1461183   | -3,40E-10 | 1,00E+00 | 1,00E+00 | Gm11615       | 1,00 | No  |
| ENSMUSG00000085084 | 1,26E+00  | -2,107739119 | 3,33E+00  | 6,79E-02 | 3,28E-01 | 4930570G19Rik | 2,39 | No  |
| ENSMUSG00000085085 | -3,39E-01 | -1,333214974 | 4,41E-01  | 5,07E-01 | 7,91E-01 | 1700086P04Rik | 0,79 | No  |
| ENSMUSG00000085088 | -5,47E-01 | 2,326590249  | 1,37E+01  | 2,15E-04 | 4,61E-03 | 4931413K12Rik | 0,68 | Yes |
| ENSMUSG00000085089 | 5,42E-01  | -1,311162453 | 1,09E+00  | 2,96E-01 | 5,92E-01 | Arhgap15os    | 1,46 | No  |
| ENSMUSG00000085091 | 4,65E-01  | -2,711731709 | 1,69E-01  | 6,81E-01 | 8,94E-01 | Egfros        | 1,38 | No  |
| ENSMUSG00000085093 | 7,04E-01  | -2,070125298 | 7,19E-01  | 3,97E-01 | 6,97E-01 | Gm12737       | 1,63 | No  |
| ENSMUSG00000085095 | 4,17E-01  | -1,424816428 | 6,20E-01  | 4,31E-01 | 7,24E-01 | Gm15635       | 1,33 | No  |
| ENSMUSG00000085097 | 1,85E+00  | -3,107657832 | 1,35E+00  | 2,46E-01 | 5,50E-01 | Gm13049       | 3,61 | No  |
| ENSMUSG00000085099 | -2,31E-01 | -0,141127648 | 5,28E-01  | 4,67E-01 | 7,56E-01 | Gm16288       | 0,85 | No  |
| ENSMUSG00000085101 | -5,10E-01 | -2,74145986  | 2,24E-01  | 6,36E-01 | 8,67E-01 | Platr16       | 0,70 | No  |
| ENSMUSG00000085102 | 6,54E-01  | -2,77064121  | 3,54E-01  | 5,52E-01 | 8,18E-01 | 1700010K24Rik | 1,57 | No  |
| ENSMUSG00000085105 | 4,30E-02  | 3,207634389  | 1,64E-01  | 6,85E-01 | 8,97E-01 | Gm12758       | 1,03 | No  |
| ENSMUSG00000085106 | 2,03E-01  | -0,946233857 | 2,29E-01  | 6,33E-01 | 8,65E-01 | Gm16000       | 1,15 | No  |
| ENSMUSG00000085109 | 4,06E-01  | 1,556961355  | 5,10E+00  | 2,39E-02 | 1,70E-01 | Gm15356       | 1,33 | No  |
| ENSMUSG00000085110 | 1,84E+00  | -2,832047238 | 1,33E+00  | 2,48E-01 | 5,50E-01 | Gm13920       | 3,59 | No  |
| ENSMUSG00000085111 | -7,13E-02 | 1,711935341  | 1,93E-01  | 6,60E-01 | 8,82E-01 | Ascl4         | 0,95 | No  |
| ENSMUSG00000085112 | 4,46E-01  | -0,61427876  | 1,32E+00  | 2,50E-01 | 5,50E-01 | A530072M11Rik | 1,36 | No  |
| ENSMUSG00000085116 | -9,40E-01 | -2,6550963   | 7,74E-01  | 3,79E-01 | 6,80E-01 | Gm2735        | 0,52 | No  |
| ENSMUSG00000085118 | 4,66E-01  | -1,136492609 | 1,06E+00  | 3,03E-01 | 6,00E-01 | Gm15774       | 1,38 | No  |
| ENSMUSG00000085124 | 3,14E-02  | -3,107617333 | -7,69E-10 | 1,00E+00 | 1,00E+00 | Gm12766       | 1,02 | No  |
| ENSMUSG00000085126 | -6,28E-01 | 0,112167016  | 4,63E+00  | 3,14E-02 | 2,05E-01 | Gm12589       | 0,65 | No  |
| ENSMUSG00000085127 | 7,61E-01  | -2,832015354 | 3,15E-01  | 5,75E-01 | 8,34E-01 | 4930444E06Rik | 1,69 | No  |
| ENSMUSG00000085129 | 1,49E-01  | 0,694122718  | 4,29E-01  | 5,12E-01 | 7,95E-01 | 5031425F14Rik | 1,11 | No  |
| ENSMUSG00000085132 | -2,13E-02 | -0,516301749 | 3,18E-03  | 9,55E-01 | 1,00E+00 | Gm12265       | 0,99 | No  |
| ENSMUSG00000085133 | -6,97E-01 | -1,711574327 | 1,39E+00  | 2,39E-01 | 5,50E-01 | B930095G15Rik | 0,62 | No  |

|                    |           |              |          |          |          |               |      |     |
|--------------------|-----------|--------------|----------|----------|----------|---------------|------|-----|
| ENSMUSG00000085143 | -3,18E-01 | -1,896134472 | 2,82E-01 | 5,96E-01 | 8,44E-01 | Gm11520       | 0,80 | No  |
| ENSMUSG00000085145 | 1,10E+00  | -1,770658365 | 2,88E+00 | 8,94E-02 | 3,79E-01 | Gm11614       | 2,15 | No  |
| ENSMUSG00000085147 | 7,31E-01  | -2,963243158 | 2,91E-01 | 5,90E-01 | 8,41E-01 | Gm12609       | 1,66 | No  |
| ENSMUSG00000085148 | -2,09E-01 | 5,078535165  | 7,87E+00 | 5,03E-03 | 5,62E-02 | Mir22hg       | 0,87 | No  |
| ENSMUSG00000085151 | 1,20E+00  | -3,146123991 | 6,74E-01 | 4,12E-01 | 7,07E-01 | 1110018N20Rik | 2,30 | No  |
| ENSMUSG00000085152 | 1,54E-01  | -0,929379887 | 1,14E-01 | 7,36E-01 | 9,24E-01 | Gm11496       | 1,11 | No  |
| ENSMUSG00000085154 | 3,18E-01  | -1,548183726 | 3,64E-01 | 5,46E-01 | 8,14E-01 | C130046K22Rik | 1,25 | No  |
| ENSMUSG00000085156 | -4,49E-01 | 4,246985165  | 2,90E+01 | 7,15E-08 | 4,11E-06 | Snhg15        | 0,73 | Yes |
| ENSMUSG00000085161 | 2,62E+00  | -2,655141459 | 2,66E+00 | 1,03E-01 | 3,95E-01 | Gm7580        | 6,16 | No  |
| ENSMUSG00000085165 | -4,18E-02 | 0,880666773  | 3,84E-02 | 8,45E-01 | 9,86E-01 | Gm12089       | 0,97 | No  |
| ENSMUSG00000085166 | -1,30E-01 | 0,607196882  | 3,18E-01 | 5,73E-01 | 8,33E-01 | Gm15522       | 0,91 | No  |
| ENSMUSG00000085167 | -1,14E-02 | -3,033635021 | 1,50E-05 | 9,97E-01 | 1,00E+00 | Gm12063       | 0,99 | No  |
| ENSMUSG00000085168 | -1,77E+00 | -2,655068999 | 2,18E+00 | 1,40E-01 | 4,73E-01 | Gm16252       | 0,29 | No  |
| ENSMUSG00000085169 | -2,62E-01 | -0,344224369 | 6,06E-01 | 4,36E-01 | 7,29E-01 | Gm10785       | 0,83 | No  |
| ENSMUSG00000085170 | 1,82E+00  | -3,033667329 | 1,31E+00 | 2,52E-01 | 5,50E-01 | Lrrc75aos1    | 3,54 | No  |
| ENSMUSG00000085171 | 2,65E+00  | -2,800942325 | 2,71E+00 | 1,00E-01 | 3,92E-01 | D830026I12Rik | 6,27 | No  |
| ENSMUSG00000085172 | 2,38E-04  | 6,331646887  | 1,41E-05 | 9,97E-01 | 1,00E+00 | Gm6542        | 1,00 | No  |
| ENSMUSG00000085173 | -1,42E-01 | 0,292216303  | 2,76E-01 | 5,99E-01 | 8,46E-01 | Gm2869        | 0,91 | No  |
| ENSMUSG00000085174 | -2,39E-02 | 2,081363956  | 2,60E-02 | 8,72E-01 | 1,00E+00 | Gm16206       | 0,98 | No  |
| ENSMUSG00000085175 | -3,99E-01 | 0,099842635  | 1,97E+00 | 1,61E-01 | 5,09E-01 | Gm11423       | 0,76 | No  |
| ENSMUSG00000085177 | 1,81E+00  | -3,10765737  | 1,28E+00 | 2,58E-01 | 5,50E-01 | Gm11209       | 3,49 | No  |
| ENSMUSG00000085178 | -3,31E-01 | 1,559203157  | 3,49E+00 | 6,16E-02 | 3,09E-01 | Kdm6bos       | 0,80 | No  |
| ENSMUSG00000085179 | 1,95E-01  | -1,929283365 | 7,69E-02 | 7,82E-01 | 9,49E-01 | Gm13645       | 1,14 | No  |
| ENSMUSG00000085180 | 1,87E+00  | -3,107639691 | 1,38E+00 | 2,40E-01 | 5,50E-01 | AI838599      | 3,67 | No  |
| ENSMUSG00000085181 | 1,41E+00  | -2,800970424 | 9,15E-01 | 3,39E-01 | 6,39E-01 | Gm12709       | 2,66 | No  |
| ENSMUSG00000085184 | 7,32E-04  | 0,530184194  | 9,36E-06 | 9,98E-01 | 1,00E+00 | 4933439K11Rik | 1,00 | No  |
| ENSMUSG00000085185 | -3,33E-01 | -0,389650365 | 9,29E-01 | 3,35E-01 | 6,36E-01 | BC028777      | 0,79 | No  |
| ENSMUSG00000085189 | -4,91E-01 | -0,117001838 | 2,51E+00 | 1,13E-01 | 4,14E-01 | Gm11963       | 0,71 | No  |
| ENSMUSG00000085192 | -1,20E-01 | -0,896010602 | 7,60E-02 | 7,83E-01 | 9,50E-01 | Gm12195       | 0,92 | No  |
| ENSMUSG00000085196 | -4,10E+00 | -2,548157029 | 8,51E+00 | 3,53E-03 | 4,32E-02 | Gm14963       | 0,06 | Yes |
| ENSMUSG00000085197 | 7,78E-01  | -2,83196814  | 3,28E-01 | 5,67E-01 | 8,29E-01 | 1700125H03Rik | 1,71 | No  |
| ENSMUSG00000085199 | 5,16E-02  | -1,669034096 | 7,76E-03 | 9,30E-01 | 1,00E+00 | Gm15346       | 1,04 | No  |

|                    |           |              |          |          |          |               |       |     |
|--------------------|-----------|--------------|----------|----------|----------|---------------|-------|-----|
| ENSMUSG00000085201 | -2,69E+00 | -2,896156915 | 2,88E+00 | 8,97E-02 | 3,80E-01 | Nr6a1os       | 0,15  | No  |
| ENSMUSG00000085204 | 1,42E-01  | -1,770650337 | 6,12E-02 | 8,05E-01 | 9,63E-01 | Gm15327       | 1,10  | No  |
| ENSMUSG00000085205 | -1,48E+00 | -2,146018053 | 2,28E+00 | 1,31E-01 | 4,55E-01 | Gm13185       | 0,36  | No  |
| ENSMUSG00000085206 | -1,89E+00 | -2,96318033  | 1,43E+00 | 2,33E-01 | 5,50E-01 | Gm13380       | 0,27  | No  |
| ENSMUSG00000085207 | 1,09E+00  | -2,378367795 | 1,13E+00 | 2,89E-01 | 5,84E-01 | Gm11767       | 2,13  | No  |
| ENSMUSG00000085208 | 1,61E-01  | 6,780691817  | 6,86E+00 | 8,84E-03 | 8,53E-02 | Brip1os       | 1,12  | No  |
| ENSMUSG00000085211 | -1,83E-01 | 0,502608557  | 5,41E-01 | 4,62E-01 | 7,51E-01 | B430219N15Rik | 0,88  | No  |
| ENSMUSG00000085213 | 7,55E-01  | -1,740933675 | 1,21E+00 | 2,72E-01 | 5,68E-01 | Gm13091       | 1,69  | No  |
| ENSMUSG00000085223 | -4,78E-01 | -1,912592054 | 5,53E-01 | 4,57E-01 | 7,46E-01 | Gm11210       | 0,72  | No  |
| ENSMUSG00000085227 | 4,12E-01  | 0,256564755  | 2,48E+00 | 1,15E-01 | 4,19E-01 | 6330418K02Rik | 1,33  | No  |
| ENSMUSG00000085228 | -3,53E+00 | -2,896127731 | 5,59E+00 | 1,81E-02 | 1,41E-01 | Gm14376       | 0,09  | No  |
| ENSMUSG00000085229 | 6,85E-01  | -2,355611    | 6,81E-01 | 4,09E-01 | 7,06E-01 | Gm11672       | 1,61  | No  |
| ENSMUSG00000085232 | 7,58E-01  | -1,497594886 | 1,94E+00 | 1,64E-01 | 5,15E-01 | Gm11962       | 1,69  | No  |
| ENSMUSG00000085234 | -2,66E+00 | -2,355499612 | 6,48E+00 | 1,09E-02 | 9,96E-02 | Gm15614       | 0,16  | No  |
| ENSMUSG00000085236 | -6,92E-01 | 1,854697876  | 2,02E+01 | 7,00E-06 | 2,43E-04 | 2610206C17Rik | 0,62  | Yes |
| ENSMUSG00000085237 | -6,91E-01 | -2,963254291 | 1,92E-01 | 6,61E-01 | 8,82E-01 | Gm15406       | 0,62  | No  |
| ENSMUSG00000085238 | 3,54E+00  | -2,832021497 | 5,46E+00 | 1,94E-02 | 1,48E-01 | 4930479D17Rik | 11,66 | No  |
| ENSMUSG00000085241 | -2,00E-01 | 1,95982744   | 1,71E+00 | 1,91E-01 | 5,50E-01 | Snhg3         | 0,87  | No  |
| ENSMUSG00000085242 | 1,88E-01  | 2,542450181  | 2,21E+00 | 1,37E-01 | 4,67E-01 | Gm11537       | 1,14  | No  |
| ENSMUSG00000085246 | -1,21E+00 | -2,185661237 | 1,90E+00 | 1,68E-01 | 5,22E-01 | Gm15893       | 0,43  | No  |
| ENSMUSG00000085247 | 1,79E+00  | -3,033666867 | 1,28E+00 | 2,58E-01 | 5,50E-01 | 4930545L23Rik | 3,46  | No  |
| ENSMUSG00000085249 | -2,71E-01 | -1,401359957 | 2,57E-01 | 6,12E-01 | 8,52E-01 | Gm12847       | 0,83  | No  |
| ENSMUSG00000085250 | 3,10E+00  | -2,896159767 | 3,91E+00 | 4,80E-02 | 2,63E-01 | Gm15234       | 8,56  | No  |
| ENSMUSG00000085255 | 3,04E-01  | 0,47739464   | 1,46E+00 | 2,27E-01 | 5,50E-01 | Taco1os       | 1,23  | No  |
| ENSMUSG00000085256 | -4,76E-01 | -0,289483668 | 2,23E+00 | 1,35E-01 | 4,63E-01 | Dmrta2os      | 0,72  | No  |
| ENSMUSG00000085260 | -8,76E-02 | -2,355602093 | 6,84E-03 | 9,34E-01 | 1,00E+00 | Med9os        | 0,94  | No  |
| ENSMUSG00000085261 | 1,63E+00  | -2,740874095 | 1,82E+00 | 1,77E-01 | 5,36E-01 | Gm13814       | 3,09  | No  |
| ENSMUSG00000085262 | 6,24E-02  | 2,693744761  | 2,58E-01 | 6,12E-01 | 8,52E-01 | Gm11574       | 1,04  | No  |
| ENSMUSG00000085264 | 1,96E-01  | -2,333223661 | 5,77E-02 | 8,10E-01 | 9,66E-01 | Gm15581       | 1,15  | No  |
| ENSMUSG00000085267 | -1,90E+00 | -3,033594154 | 1,44E+00 | 2,30E-01 | 5,50E-01 | Gm14235       | 0,27  | No  |
| ENSMUSG00000085269 | 4,39E-01  | 0,206306153  | 2,88E+00 | 8,98E-02 | 3,80E-01 | Gm15777       | 1,36  | No  |
| ENSMUSG00000085272 | -7,25E-01 | -2,548217321 | 5,88E-01 | 4,43E-01 | 7,35E-01 | Sbk3          | 0,61  | No  |

|                    |           |              |          |          |          |               |      |     |
|--------------------|-----------|--------------|----------|----------|----------|---------------|------|-----|
| ENSMUSG00000085274 | -3,57E-02 | 0,032481495  | 1,46E-02 | 9,04E-01 | 1,00E+00 | BC046401      | 0,98 | No  |
| ENSMUSG00000085275 | -2,67E+00 | -2,770577046 | 2,85E+00 | 9,16E-02 | 3,82E-01 | Gm14487       | 0,16 | No  |
| ENSMUSG00000085278 | -1,19E-01 | 1,921972626  | 5,72E-01 | 4,49E-01 | 7,39E-01 | Gm12841       | 0,92 | No  |
| ENSMUSG00000085279 | -2,48E+00 | -2,247100751 | 5,32E+00 | 2,11E-02 | 1,57E-01 | Gm15965       | 0,18 | No  |
| ENSMUSG00000085281 | -4,67E-02 | 1,594387946  | 7,12E-02 | 7,90E-01 | 9,54E-01 | Gm13316       | 0,97 | No  |
| ENSMUSG00000085282 | -5,76E-01 | 1,085577958  | 9,02E+00 | 2,66E-03 | 3,49E-02 | Gm15663       | 0,67 | Yes |
| ENSMUSG00000085286 | 4,58E-01  | 1,472188332  | 6,59E+00 | 1,03E-02 | 9,53E-02 | Ube4bos3      | 1,37 | No  |
| ENSMUSG00000085287 | -1,56E-02 | 1,203065804  | 6,49E-03 | 9,36E-01 | 1,00E+00 | 4833418N02Rik | 0,99 | No  |
| ENSMUSG00000085289 | 2,55E-01  | 3,340436388  | 5,97E+00 | 1,46E-02 | 1,23E-01 | Gm15337       | 1,19 | No  |
| ENSMUSG00000085293 | 1,80E+00  | -3,070187705 | 1,28E+00 | 2,58E-01 | 5,50E-01 | Gm13817       | 3,47 | No  |
| ENSMUSG00000085295 | -8,21E-03 | 4,562112531  | 1,02E-02 | 9,20E-01 | 1,00E+00 | 4930430E12Rik | 0,99 | No  |
| ENSMUSG00000085297 | 5,14E-01  | -0,529154467 | 1,84E+00 | 1,75E-01 | 5,33E-01 | Gm11651       | 1,43 | No  |
| ENSMUSG00000085298 | -1,87E+00 | -2,896094734 | 1,42E+00 | 2,34E-01 | 5,50E-01 | F730035M05Rik | 0,27 | No  |
| ENSMUSG00000085300 | -8,15E-01 | -2,770569811 | 3,66E-01 | 5,45E-01 | 8,13E-01 | Gm16345       | 0,57 | No  |
| ENSMUSG00000085303 | 1,75E+00  | -2,74091889  | 2,19E+00 | 1,39E-01 | 4,70E-01 | Gm16751       | 3,36 | No  |
| ENSMUSG00000085304 | 1,13E-01  | -0,305779615 | 1,27E-01 | 7,22E-01 | 9,16E-01 | Gm12802       | 1,08 | No  |
| ENSMUSG00000085307 | -6,40E-02 | -2,600660034 | 3,73E-03 | 9,51E-01 | 1,00E+00 | Gm11525       | 0,96 | No  |
| ENSMUSG00000085310 | 4,19E-01  | 1,055446385  | 4,52E+00 | 3,35E-02 | 2,15E-01 | Gm11491       | 1,34 | No  |
| ENSMUSG00000085311 | -2,33E-01 | 0,530403885  | 8,20E-01 | 3,65E-01 | 6,66E-01 | Gm15445       | 0,85 | No  |
| ENSMUSG00000085315 | -4,41E-01 | -0,172131477 | 2,12E+00 | 1,46E-01 | 4,83E-01 | A430018G15Rik | 0,74 | No  |
| ENSMUSG00000085316 | -7,22E-01 | -0,278862283 | 5,12E+00 | 2,37E-02 | 1,69E-01 | D330050G23Rik | 0,61 | No  |
| ENSMUSG00000085317 | -1,26E+00 | -2,333569415 | 1,90E+00 | 1,68E-01 | 5,22E-01 | Gssos2        | 0,42 | No  |
| ENSMUSG00000085319 | -2,68E+00 | -3,033645766 | 2,84E+00 | 9,17E-02 | 3,82E-01 | Gm13330       | 0,16 | No  |
| ENSMUSG00000085321 | 1,87E+00  | -3,107639691 | 1,38E+00 | 2,40E-01 | 5,50E-01 | 4930412F09Rik | 3,67 | No  |
| ENSMUSG00000085323 | -1,89E+00 | -3,1076441   | 1,42E+00 | 2,33E-01 | 5,50E-01 | 9130410C08Rik | 0,27 | No  |
| ENSMUSG00000085326 | -3,06E-01 | -0,704553897 | 6,75E-01 | 4,11E-01 | 7,07E-01 | Gm15642       | 0,81 | No  |
| ENSMUSG00000085327 | 3,76E-01  | -1,800977303 | 3,42E-01 | 5,59E-01 | 8,22E-01 | Gm16104       | 1,30 | No  |
| ENSMUSG00000085328 | 1,05E+00  | -2,14612663  | 1,79E+00 | 1,80E-01 | 5,42E-01 | Gm17131       | 2,08 | No  |
| ENSMUSG00000085330 | 1,85E+00  | -3,107657832 | 1,35E+00 | 2,46E-01 | 5,50E-01 | Gm13417       | 3,61 | No  |
| ENSMUSG00000085331 | 1,65E-01  | 0,752912897  | 6,10E-01 | 4,35E-01 | 7,28E-01 | Gm11274       | 1,12 | No  |
| ENSMUSG00000085333 | -2,32E+00 | -3,07016418  | 2,10E+00 | 1,47E-01 | 4,86E-01 | 1700030A11Rik | 0,20 | No  |
| ENSMUSG00000085334 | 5,01E-02  | 4,299723022  | 3,64E-01 | 5,46E-01 | 8,14E-01 | Gm12940       | 1,04 | No  |

|                    |           |              |           |          |          |               |       |     |
|--------------------|-----------|--------------|-----------|----------|----------|---------------|-------|-----|
| ENSMUSG00000085335 | 2,39E-01  | -0,372729947 | 4,86E-01  | 4,86E-01 | 7,73E-01 | Gm13684       | 1,18  | No  |
| ENSMUSG00000085337 | 8,84E-02  | 3,231888313  | 6,97E-01  | 4,04E-01 | 7,01E-01 | Gm15964       | 1,06  | No  |
| ENSMUSG00000085340 | -2,25E-01 | 3,074440677  | 4,28E+00  | 3,86E-02 | 2,33E-01 | Gm16335       | 0,86  | No  |
| ENSMUSG00000085342 | -2,13E-01 | 6,656357923  | 1,18E+01  | 5,90E-04 | 1,05E-02 | Gm12254       | 0,86  | Yes |
| ENSMUSG00000085347 | -8,20E-01 | -1,215892523 | 2,63E+00  | 1,05E-01 | 3,97E-01 | Hk1os         | 0,57  | No  |
| ENSMUSG00000085351 | -8,00E-01 | -2,268080566 | 9,31E-01  | 3,35E-01 | 6,35E-01 | Gm12472       | 0,57  | No  |
| ENSMUSG00000085353 | 9,01E-03  | -3,107646452 | -5,16E-10 | 1,00E+00 | 1,00E+00 | 1700092C17Rik | 1,01  | No  |
| ENSMUSG00000085354 | -6,23E-01 | -1,477110723 | 1,42E+00  | 2,33E-01 | 5,50E-01 | Gm2044        | 0,65  | No  |
| ENSMUSG00000085355 | -3,20E-01 | 0,593001604  | 1,79E+00  | 1,80E-01 | 5,42E-01 | 3010003L21Rik | 0,80  | No  |
| ENSMUSG00000085360 | 1,29E-01  | 1,709244492  | 6,17E-01  | 4,32E-01 | 7,26E-01 | Arhgap27os2   | 1,09  | No  |
| ENSMUSG00000085361 | 1,10E+00  | -2,311155155 | 1,14E+00  | 2,85E-01 | 5,81E-01 | Gm16305       | 2,14  | No  |
| ENSMUSG00000085363 | 4,88E-02  | 0,036653927  | 2,63E-02  | 8,71E-01 | 1,00E+00 | Gm15478       | 1,03  | No  |
| ENSMUSG00000085368 | 9,01E-03  | -3,107646452 | -5,16E-10 | 1,00E+00 | 1,00E+00 | Gm16188       | 1,01  | No  |
| ENSMUSG00000085371 | -1,69E+00 | -2,770605625 | 1,99E+00  | 1,59E-01 | 5,06E-01 | Gm3160        | 0,31  | No  |
| ENSMUSG00000085375 | 2,06E-01  | -2,497538968 | 5,33E-02  | 8,17E-01 | 9,70E-01 | Gm12506       | 1,15  | No  |
| ENSMUSG00000085376 | -3,04E-01 | -0,205876489 | 9,16E-01  | 3,39E-01 | 6,39E-01 | Gm14508       | 0,81  | No  |
| ENSMUSG00000085377 | 3,50E+00  | -2,832062758 | 5,31E+00  | 2,12E-02 | 1,57E-01 | 4930551L18Rik | 11,29 | No  |
| ENSMUSG00000085378 | 9,46E-01  | -1,089051142 | 4,41E+00  | 3,57E-02 | 2,24E-01 | Gm11415       | 1,93  | No  |
| ENSMUSG00000085379 | 8,02E-02  | 0,344803159  | 9,74E-02  | 7,55E-01 | 9,34E-01 | 2310058D17Rik | 1,06  | No  |
| ENSMUSG00000085385 | 4,05E-02  | 4,728200607  | 2,70E-01  | 6,03E-01 | 8,48E-01 | Snhg17        | 1,03  | No  |
| ENSMUSG00000085388 | 1,23E+00  | -2,57421552  | 9,42E-01  | 3,32E-01 | 6,32E-01 | Ptf1aos       | 2,35  | No  |
| ENSMUSG00000085389 | -1,50E+00 | -2,548183068 | 2,33E+00  | 1,27E-01 | 4,46E-01 | 1700003M07Rik | 0,35  | No  |
| ENSMUSG00000085391 | 1,62E+00  | -2,600606177 | 1,80E+00  | 1,80E-01 | 5,41E-01 | Gm16150       | 3,07  | No  |
| ENSMUSG00000085394 | -2,71E+00 | -3,033620915 | 2,92E+00  | 8,75E-02 | 3,78E-01 | 2210414B05Rik | 0,15  | No  |
| ENSMUSG00000085397 | -5,20E-02 | -2,497530991 | 3,09E-03  | 9,56E-01 | 1,00E+00 | Gm13524       | 0,96  | No  |
| ENSMUSG00000085398 | -5,01E-01 | -1,485198164 | 1,02E+00  | 3,13E-01 | 6,12E-01 | 4931406G06Rik | 0,71  | No  |
| ENSMUSG00000085399 | 2,91E-01  | 1,225680799  | 2,23E+00  | 1,36E-01 | 4,64E-01 | Foxd2os       | 1,22  | No  |
| ENSMUSG00000085401 | 1,31E-01  | 4,44955581   | 2,61E+00  | 1,06E-01 | 3,99E-01 | Slc39a1-ps    | 1,09  | No  |
| ENSMUSG00000085403 | 1,42E-01  | 0,23712742   | 2,40E-01  | 6,24E-01 | 8,59E-01 | Gm13068       | 1,10  | No  |
| ENSMUSG00000085408 | -1,09E-01 | 1,985884228  | 5,45E-01  | 4,60E-01 | 7,49E-01 | C530005A16Rik | 0,93  | No  |
| ENSMUSG00000085409 | 4,84E-01  | -2,497587191 | 3,18E-01  | 5,73E-01 | 8,33E-01 | Gm16155       | 1,40  | No  |
| ENSMUSG00000085411 | 3,14E-02  | -3,107617333 | -7,69E-10 | 1,00E+00 | 1,00E+00 | Gm14319       | 1,02  | No  |

|                    |           |              |           |          |          |               |      |     |
|--------------------|-----------|--------------|-----------|----------|----------|---------------|------|-----|
| ENSMUSG00000085415 | -5,77E-01 | 0,324112336  | 4,73E+00  | 2,97E-02 | 1,97E-01 | Gm12060       | 0,67 | No  |
| ENSMUSG00000085417 | -3,75E-02 | -2,711682702 | 7,22E-04  | 9,79E-01 | 1,00E+00 | Gm13919       | 0,97 | No  |
| ENSMUSG00000085419 | 1,81E+00  | -3,10765737  | 1,28E+00  | 2,58E-01 | 5,50E-01 | Gm11734       | 3,49 | No  |
| ENSMUSG00000085421 | 1,85E+00  | -3,107657832 | 1,35E+00  | 2,46E-01 | 5,50E-01 | 4732490B19Rik | 3,61 | No  |
| ENSMUSG00000085423 | 3,67E-02  | -2,963207527 | 2,07E-11  | 1,00E+00 | 1,00E+00 | Gm15735       | 1,03 | No  |
| ENSMUSG00000085424 | 1,85E+00  | -3,107657832 | 1,35E+00  | 2,46E-01 | 5,50E-01 | Fhad1os1      | 3,61 | No  |
| ENSMUSG00000085425 | 4,57E-02  | 5,175247265  | 4,00E-01  | 5,27E-01 | 8,03E-01 | Gm15648       | 1,03 | No  |
| ENSMUSG00000085429 | -1,74E+00 | -2,448697521 | 2,11E+00  | 1,46E-01 | 4,84E-01 | Gm13485       | 0,30 | No  |
| ENSMUSG00000085431 | -3,83E-02 | -3,107651936 | -7,91E-11 | 1,00E+00 | 1,00E+00 | 4930440I19Rik | 0,97 | No  |
| ENSMUSG00000085433 | 8,06E-02  | 1,003954455  | 1,43E-01  | 7,05E-01 | 9,07E-01 | Gm16001       | 1,06 | No  |
| ENSMUSG00000085434 | 5,38E-01  | -1,436667282 | 1,07E+00  | 3,00E-01 | 5,96E-01 | Gm11725       | 1,45 | No  |
| ENSMUSG00000085436 | 8,57E-01  | 0,313108147  | 9,36E+00  | 2,22E-03 | 3,04E-02 | Zfp335os      | 1,81 | Yes |
| ENSMUSG00000085437 | -4,62E-01 | -2,522661603 | 1,93E-01  | 6,60E-01 | 8,82E-01 | 1700047A11Rik | 0,73 | No  |
| ENSMUSG00000085438 | -6,39E-03 | 7,271917273  | 1,15E-02  | 9,15E-01 | 1,00E+00 | 1700020I14Rik | 1,00 | No  |
| ENSMUSG00000085439 | 9,01E-03  | -3,107646452 | -5,16E-10 | 1,00E+00 | 1,00E+00 | Rapgef4os1    | 1,01 | No  |
| ENSMUSG00000085442 | -2,03E-01 | 6,792104669  | 1,09E+01  | 9,82E-04 | 1,60E-02 | Gm3362        | 0,87 | Yes |
| ENSMUSG00000085445 | 1,87E+00  | -3,107639691 | 1,38E+00  | 2,40E-01 | 5,50E-01 | Gm16348       | 3,67 | No  |
| ENSMUSG00000085448 | -2,50E-01 | -0,713812813 | 3,85E-01  | 5,35E-01 | 8,07E-01 | Gm13963       | 0,84 | No  |
| ENSMUSG00000085451 | 1,81E+00  | -3,10765737  | 1,28E+00  | 2,58E-01 | 5,50E-01 | Gm15137       | 3,49 | No  |
| ENSMUSG00000085456 | 6,72E-01  | -1,614109801 | 1,28E+00  | 2,59E-01 | 5,51E-01 | Gm15398       | 1,59 | No  |
| ENSMUSG00000085457 | -9,14E-02 | 1,093319594  | 2,10E-01  | 6,47E-01 | 8,74E-01 | 1110046J04Rik | 0,94 | No  |
| ENSMUSG00000085464 | -5,12E-01 | -2,770591253 | 1,32E-01  | 7,17E-01 | 9,13E-01 | Gm16208       | 0,70 | No  |
| ENSMUSG00000085465 | -3,20E-01 | 3,02733975   | 8,56E+00  | 3,44E-03 | 4,24E-02 | Gm15347       | 0,80 | Yes |
| ENSMUSG00000085467 | 8,05E-01  | -1,54831238  | 2,21E+00  | 1,37E-01 | 4,68E-01 | Gm11842       | 1,75 | No  |
| ENSMUSG00000085468 | -2,49E-02 | -3,146121042 | -4,44E-11 | 1,00E+00 | 1,00E+00 | Gm15343       | 0,98 | No  |
| ENSMUSG00000085471 | 8,93E-02  | -0,528927175 | 4,92E-02  | 8,24E-01 | 9,74E-01 | 4933423P22Rik | 1,06 | No  |
| ENSMUSG00000085473 | -3,79E-02 | -2,655145707 | 1,41E-03  | 9,70E-01 | 1,00E+00 | Gm16686       | 0,97 | No  |
| ENSMUSG00000085477 | 7,36E-01  | -2,655133636 | 2,95E-01  | 5,87E-01 | 8,40E-01 | Gm13335       | 1,67 | No  |
| ENSMUSG00000085481 | 3,35E-01  | -0,785758354 | 6,61E-01  | 4,16E-01 | 7,11E-01 | Gm16304       | 1,26 | No  |
| ENSMUSG00000085482 | -8,72E-01 | -2,770651596 | 4,16E-01  | 5,19E-01 | 7,98E-01 | A230083N12Rik | 0,55 | No  |
| ENSMUSG00000085483 | -8,03E-01 | -1,215987653 | 2,90E+00  | 8,88E-02 | 3,79E-01 | Gm14198       | 0,57 | No  |
| ENSMUSG00000085485 | 1,35E-01  | 1,099767251  | 4,63E-01  | 4,96E-01 | 7,81E-01 | Gm14024       | 1,10 | No  |

|                    |           |              |           |          |          |               |      |     |
|--------------------|-----------|--------------|-----------|----------|----------|---------------|------|-----|
| ENSMUSG00000085486 | 1,69E+00  | -1,963333099 | 4,46E+00  | 3,47E-02 | 2,20E-01 | Gm11634       | 3,22 | No  |
| ENSMUSG00000085487 | 4,06E-01  | 0,344590914  | 2,39E+00  | 1,22E-01 | 4,36E-01 | Gm15654       | 1,33 | No  |
| ENSMUSG00000085492 | 5,48E-02  | 2,222482786  | 1,53E-01  | 6,95E-01 | 9,02E-01 | Trmt61b       | 1,04 | No  |
| ENSMUSG00000085495 | 3,69E-01  | -1,333320392 | 5,74E-01  | 4,49E-01 | 7,39E-01 | Gm16796       | 1,29 | No  |
| ENSMUSG00000085498 | -7,66E-01 | 3,962429993  | 6,91E+01  | 9,40E-17 | 1,67E-14 | Gm14023       | 0,59 | Yes |
| ENSMUSG00000085499 | -7,76E-02 | -2,963273445 | 2,73E-03  | 9,58E-01 | 1,00E+00 | Gm15713       | 0,95 | No  |
| ENSMUSG00000085500 | 6,12E-01  | -2,929306627 | 1,49E-01  | 6,99E-01 | 9,04E-01 | Gm16976       | 1,53 | No  |
| ENSMUSG00000085501 | 6,71E-01  | -0,548372418 | 3,49E+00  | 6,17E-02 | 3,09E-01 | Gm11772       | 1,59 | No  |
| ENSMUSG00000085505 | 1,71E-01  | 1,374055829  | 8,72E-01  | 3,50E-01 | 6,52E-01 | Gm12868       | 1,13 | No  |
| ENSMUSG00000085509 | 2,15E-01  | -2,126765594 | 8,77E-02  | 7,67E-01 | 9,40E-01 | Gm11521       | 1,16 | No  |
| ENSMUSG00000085511 | -1,30E+00 | -2,71171755  | 1,33E+00  | 2,49E-01 | 5,50E-01 | Gm11738       | 0,41 | No  |
| ENSMUSG00000085513 | -3,19E+00 | -2,831992175 | 4,29E+00  | 3,83E-02 | 2,32E-01 | Gm16363       | 0,11 | No  |
| ENSMUSG00000085514 | 4,24E-02  | -3,033592245 | -1,17E-09 | 1,00E+00 | 1,00E+00 | Bcas3os2      | 1,03 | No  |
| ENSMUSG00000085516 | 1,48E+00  | -2,146196204 | 3,67E+00  | 5,55E-02 | 2,89E-01 | 4930538E20Rik | 2,79 | No  |
| ENSMUSG00000085519 | 1,00E+00  | -1,91269193  | 1,95E+00  | 1,62E-01 | 5,12E-01 | Gm13703       | 2,00 | No  |
| ENSMUSG00000085521 | 8,93E-02  | 3,669132973  | 8,78E-01  | 3,49E-01 | 6,50E-01 | 4930526A20Rik | 1,06 | No  |
| ENSMUSG00000085523 | -1,50E-01 | -1,997996748 | 4,86E-02  | 8,25E-01 | 9,74E-01 | Gm15945       | 0,90 | No  |
| ENSMUSG00000085524 | -6,42E-02 | -2,711709003 | 2,79E-03  | 9,58E-01 | 1,00E+00 | Gm14224       | 0,96 | No  |
| ENSMUSG00000085525 | -9,88E-02 | 1,413167123  | 2,86E-01  | 5,93E-01 | 8,42E-01 | Gm13166       | 0,93 | No  |
| ENSMUSG00000085526 | -7,51E-02 | -3,045961648 | 1,95E-03  | 9,65E-01 | 1,00E+00 | Gm16083       | 0,95 | No  |
| ENSMUSG00000085527 | 7,23E-01  | -2,185583311 | 7,58E-01  | 3,84E-01 | 6,85E-01 | Gm15535       | 1,65 | No  |
| ENSMUSG00000085531 | 6,51E-01  | 1,001618468  | 8,64E+00  | 3,29E-03 | 4,11E-02 | Slc36a3os     | 1,57 | Yes |
| ENSMUSG00000085532 | -3,88E+00 | -2,831962641 | 7,23E+00  | 7,19E-03 | 7,33E-02 | B430319H21Rik | 0,07 | No  |
| ENSMUSG00000085538 | -1,16E-01 | -0,600562412 | 1,01E-01  | 7,51E-01 | 9,32E-01 | Gm11455       | 0,92 | No  |
| ENSMUSG00000085539 | -1,51E+00 | -2,831987533 | 1,50E+00  | 2,20E-01 | 5,50E-01 | Gm15561       | 0,35 | No  |
| ENSMUSG00000085540 | 1,85E+00  | -3,107657832 | 1,35E+00  | 2,46E-01 | 5,50E-01 | Gm16036       | 3,61 | No  |
| ENSMUSG00000085541 | -8,31E-02 | 0,778817975  | 1,39E-01  | 7,09E-01 | 9,09E-01 | Gm16010       | 0,94 | No  |
| ENSMUSG00000085543 | 1,53E-01  | 1,764065285  | 8,88E-01  | 3,46E-01 | 6,47E-01 | Gm13568       | 1,11 | No  |
| ENSMUSG00000085546 | 1,23E-01  | 0,090106893  | 1,89E-01  | 6,63E-01 | 8,84E-01 | Gm14252       | 1,09 | No  |
| ENSMUSG00000085547 | 1,66E-01  | 2,495546844  | 1,61E+00  | 2,05E-01 | 5,50E-01 | Gm13767       | 1,12 | No  |
| ENSMUSG00000085548 | -6,44E-02 | -2,832023595 | 2,81E-03  | 9,58E-01 | 1,00E+00 | Gm11753       | 0,96 | No  |
| ENSMUSG00000085550 | 5,99E-01  | -0,56775762  | 2,51E+00  | 1,13E-01 | 4,14E-01 | Gm15658       | 1,51 | No  |

|                    |           |              |          |          |          |               |       |     |
|--------------------|-----------|--------------|----------|----------|----------|---------------|-------|-----|
| ENSMUSG00000085555 | -1,89E+00 | -3,033648118 | 1,42E+00 | 2,33E-01 | 5,50E-01 | 2610035F20Rik | 0,27  | No  |
| ENSMUSG00000085558 | -5,13E-01 | -1,185618536 | 1,22E+00 | 2,70E-01 | 5,66E-01 | 4930412C18Rik | 0,70  | No  |
| ENSMUSG00000085560 | -2,98E-01 | -0,321921286 | 7,45E-01 | 3,88E-01 | 6,88E-01 | C230038L03Rik | 0,81  | No  |
| ENSMUSG00000085563 | 3,42E-01  | -0,97216521  | 7,07E-01 | 4,00E-01 | 6,99E-01 | 2210411M09Rik | 1,27  | No  |
| ENSMUSG00000085566 | 3,84E-02  | 5,135203799  | 2,81E-01 | 5,96E-01 | 8,44E-01 | A730017L22Rik | 1,03  | No  |
| ENSMUSG00000085572 | 2,47E-02  | 2,013960446  | 2,71E-02 | 8,69E-01 | 1,00E+00 | Gm16234       | 1,02  | No  |
| ENSMUSG00000085574 | 3,12E+00  | -2,655151146 | 3,98E+00 | 4,61E-02 | 2,56E-01 | Gm13053       | 8,71  | No  |
| ENSMUSG00000085578 | 4,37E-01  | -2,015757622 | 3,93E-01 | 5,31E-01 | 8,05E-01 | Gm11527       | 1,35  | No  |
| ENSMUSG00000085581 | 4,09E-01  | -2,311206903 | 2,68E-01 | 6,05E-01 | 8,49E-01 | Gm12786       | 1,33  | No  |
| ENSMUSG00000085586 | -5,14E-01 | 2,585058007  | 1,72E+01 | 3,43E-05 | 9,85E-04 | Gm11613       | 0,70  | Yes |
| ENSMUSG00000085589 | -2,37E-01 | -0,998016054 | 2,91E-01 | 5,90E-01 | 8,41E-01 | A430078I02Rik | 0,85  | No  |
| ENSMUSG00000085591 | -3,17E+00 | -2,896136416 | 4,22E+00 | 4,00E-02 | 2,37E-01 | Gm13479       | 0,11  | No  |
| ENSMUSG00000085595 | -6,90E-01 | -3,070152718 | 1,90E-01 | 6,63E-01 | 8,83E-01 | Gm16090       | 0,62  | No  |
| ENSMUSG00000085596 | -5,40E-01 | -2,674645447 | 2,40E-01 | 6,24E-01 | 8,59E-01 | Gm11476       | 0,69  | No  |
| ENSMUSG00000085599 | 1,81E+00  | -3,10765737  | 1,28E+00 | 2,58E-01 | 5,50E-01 | Gm13449       | 3,49  | No  |
| ENSMUSG00000085601 | -8,08E-02 | -1,65508683  | 1,83E-02 | 8,92E-01 | 1,00E+00 | Gm4969        | 0,95  | No  |
| ENSMUSG00000085603 | 3,50E+00  | -2,832044636 | 5,33E+00 | 2,09E-02 | 1,56E-01 | Gm11346       | 11,35 | No  |
| ENSMUSG00000085604 | -5,66E-02 | 0,320424174  | 4,95E-02 | 8,24E-01 | 9,73E-01 | Dhx58os       | 0,96  | No  |
| ENSMUSG00000085606 | 5,27E-01  | 0,814074248  | 5,41E+00 | 2,00E-02 | 1,51E-01 | Gm15792       | 1,44  | No  |
| ENSMUSG00000085609 | -1,54E-01 | 1,648993023  | 8,75E-01 | 3,50E-01 | 6,51E-01 | 1700016P03Rik | 0,90  | No  |
| ENSMUSG00000085612 | -8,63E-02 | 1,122404794  | 1,85E-01 | 6,67E-01 | 8,86E-01 | Gm15868       | 0,94  | No  |
| ENSMUSG00000085614 | 2,04E-01  | -0,989259027 | 2,35E-01 | 6,28E-01 | 8,61E-01 | 1700123M08Rik | 1,15  | No  |
| ENSMUSG00000085615 | 2,42E-01  | -0,855701512 | 3,56E-01 | 5,51E-01 | 8,17E-01 | A330035P11Rik | 1,18  | No  |
| ENSMUSG00000085618 | 1,85E+00  | -3,107657832 | 1,35E+00 | 2,46E-01 | 5,50E-01 | Gm11466       | 3,61  | No  |
| ENSMUSG00000085620 | 1,85E+00  | -2,963247546 | 1,34E+00 | 2,48E-01 | 5,50E-01 | G630018N14Rik | 3,59  | No  |
| ENSMUSG00000085622 | -3,06E-01 | 2,433235327  | 5,32E+00 | 2,11E-02 | 1,56E-01 | 3110056K07Rik | 0,81  | No  |
| ENSMUSG00000085624 | -7,65E-02 | -2,998036993 | 2,75E-03 | 9,58E-01 | 1,00E+00 | Gm14573       | 0,95  | No  |
| ENSMUSG00000085625 | 7,36E-01  | -2,832019157 | 2,95E-01 | 5,87E-01 | 8,40E-01 | Gm8813        | 1,67  | No  |
| ENSMUSG00000085626 | -2,43E-02 | 0,467775018  | 1,01E-02 | 9,20E-01 | 1,00E+00 | Gm12898       | 0,98  | No  |
| ENSMUSG00000085627 | -2,49E-02 | 4,186647014  | 8,33E-02 | 7,73E-01 | 9,44E-01 | Gm11222       | 0,98  | No  |
| ENSMUSG00000085628 | 1,03E-01  | 1,085484915  | 2,69E-01 | 6,04E-01 | 8,49E-01 | Appbp2os      | 1,07  | No  |
| ENSMUSG00000085629 | -3,21E-01 | -2,62764087  | 8,74E-02 | 7,68E-01 | 9,41E-01 | Gm11697       | 0,80  | No  |



|                    |           |              |          |          |          |               |      |    |
|--------------------|-----------|--------------|----------|----------|----------|---------------|------|----|
| ENSMUSG00000085631 | -1,47E+00 | -2,896117921 | 1,01E+00 | 3,14E-01 | 6,14E-01 | 9630028H03Rik | 0,36 | No |
| ENSMUSG00000085633 | -4,07E-01 | -1,998056059 | 3,44E-01 | 5,57E-01 | 8,21E-01 | Bloc1s6os     | 0,75 | No |
| ENSMUSG00000085636 | 1,91E-01  | 2,589952148  | 2,28E+00 | 1,31E-01 | 4,55E-01 | Gm11769       | 1,14 | No |
| ENSMUSG00000085637 | -3,67E-01 | -1,711760163 | 3,45E-01 | 5,57E-01 | 8,21E-01 | 1700048M11Rik | 0,78 | No |
| ENSMUSG00000085642 | -1,33E-01 | 1,250416672  | 4,77E-01 | 4,90E-01 | 7,76E-01 | 3110053B16Rik | 0,91 | No |
| ENSMUSG00000085651 | 1,87E+00  | -3,107639691 | 1,38E+00 | 2,40E-01 | 5,50E-01 | Gm11695       | 3,67 | No |
| ENSMUSG00000085652 | 1,21E-02  | -3,033650469 | 7,34E-11 | 1,00E+00 | 1,00E+00 | Gm11999       | 1,01 | No |
| ENSMUSG00000085654 | -1,58E+00 | -2,683115727 | 2,16E+00 | 1,42E-01 | 4,76E-01 | Gm12536       | 0,33 | No |
| ENSMUSG00000085655 | -6,35E-01 | -0,033644598 | 3,79E+00 | 5,15E-02 | 2,76E-01 | Gm15952       | 0,64 | No |
| ENSMUSG00000085658 | 7,06E-01  | -1,355588273 | 1,80E+00 | 1,80E-01 | 5,41E-01 | Gm15704       | 1,63 | No |
| ENSMUSG00000085660 | 1,79E+00  | -3,033666867 | 1,28E+00 | 2,58E-01 | 5,50E-01 | Gm12434       | 3,46 | No |
| ENSMUSG00000085663 | 8,06E-01  | -1,126918313 | 3,26E+00 | 7,11E-02 | 3,38E-01 | Gm15718       | 1,75 | No |
| ENSMUSG00000085664 | -2,87E-01 | 1,741043848  | 3,23E+00 | 7,23E-02 | 3,41E-01 | Atxn7l1os2    | 0,82 | No |
| ENSMUSG00000085665 | -9,33E-01 | -2,548236979 | 7,63E-01 | 3,82E-01 | 6,84E-01 | Gm12059       | 0,52 | No |
| ENSMUSG00000085666 | 2,65E-02  | 3,39919679   | 6,69E-02 | 7,96E-01 | 9,57E-01 | Gm9855        | 1,02 | No |
| ENSMUSG00000085667 | 3,52E-02  | 4,847962738  | 2,15E-01 | 6,43E-01 | 8,72E-01 | Gm12992       | 1,02 | No |
| ENSMUSG00000085668 | -5,88E-02 | -3,033616507 | 1,62E-03 | 9,68E-01 | 1,00E+00 | Gm35202       | 0,96 | No |
| ENSMUSG00000085672 | -8,10E-01 | -2,963247942 | 3,56E-01 | 5,51E-01 | 8,17E-01 | Gm16193       | 0,57 | No |
| ENSMUSG00000085673 | -8,17E-02 | -2,711767916 | 4,47E-03 | 9,47E-01 | 1,00E+00 | Gm16122       | 0,94 | No |
| ENSMUSG00000085677 | -1,89E+00 | -3,1076441   | 1,42E+00 | 2,33E-01 | 5,50E-01 | 4930594O21Rik | 0,27 | No |
| ENSMUSG00000085678 | 1,17E+00  | -2,627655467 | 1,08E+00 | 2,99E-01 | 5,95E-01 | Gm16349       | 2,25 | No |
| ENSMUSG00000085682 | -1,87E+00 | -3,033619006 | 1,41E+00 | 2,36E-01 | 5,50E-01 | Gm14267       | 0,27 | No |
| ENSMUSG00000085684 | 7,99E-02  | 1,179849988  | 1,54E-01 | 6,95E-01 | 9,02E-01 | 4930469K13Rik | 1,06 | No |
| ENSMUSG00000085687 | -5,92E-02 | 2,174446246  | 1,81E-01 | 6,71E-01 | 8,88E-01 | Gm16153       | 0,96 | No |
| ENSMUSG00000085688 | 7,97E-01  | -2,770622674 | 4,49E-01 | 5,03E-01 | 7,88E-01 | Gm15395       | 1,74 | No |
| ENSMUSG00000085689 | -1,86E+00 | -3,033627224 | 1,40E+00 | 2,37E-01 | 5,50E-01 | Gm16838       | 0,27 | No |
| ENSMUSG00000085693 | -1,87E+00 | -3,03364178  | 1,41E+00 | 2,36E-01 | 5,50E-01 | Gm13371       | 0,27 | No |
| ENSMUSG00000085696 | 3,34E-01  | -1,510381379 | 3,48E-01 | 5,55E-01 | 8,20E-01 | Hoxaas3       | 1,26 | No |
| ENSMUSG00000085700 | 2,74E-02  | -3,033621357 | 9,16E-12 | 1,00E+00 | 1,00E+00 | Hbb-bh0       | 1,02 | No |
| ENSMUSG00000085701 | 7,35E-01  | -2,896169732 | 2,94E-01 | 5,88E-01 | 8,40E-01 | Gm12968       | 1,66 | No |
| ENSMUSG00000085704 | -2,72E-02 | 1,261280813  | 2,14E-02 | 8,84E-01 | 1,00E+00 | 4921531C22Rik | 0,98 | No |
| ENSMUSG00000085705 | 9,05E-01  | -1,401505707 | 2,62E+00 | 1,05E-01 | 3,97E-01 | Gm16046       | 1,87 | No |

|                    |           |              |          |          |          |               |      |     |
|--------------------|-----------|--------------|----------|----------|----------|---------------|------|-----|
| ENSMUSG00000085712 | 1,21E-01  | -2,740908069 | 1,39E-02 | 9,06E-01 | 1,00E+00 | Gm15124       | 1,09 | No  |
| ENSMUSG00000085713 | -7,69E-01 | -1,963320518 | 1,21E+00 | 2,72E-01 | 5,69E-01 | Gm15736       | 0,59 | No  |
| ENSMUSG00000085714 | 2,39E-02  | 3,430114489  | 5,63E-02 | 8,13E-01 | 9,67E-01 | Gm13008       | 1,02 | No  |
| ENSMUSG00000085716 | 3,13E+00  | -2,896142102 | 3,99E+00 | 4,58E-02 | 2,55E-01 | Gm13388       | 8,74 | No  |
| ENSMUSG00000085719 | -1,36E+00 | -2,831960587 | 1,15E+00 | 2,83E-01 | 5,79E-01 | 4933424L21Rik | 0,39 | No  |
| ENSMUSG00000085720 | 3,80E-01  | -0,442639805 | 1,21E+00 | 2,72E-01 | 5,68E-01 | Gm7854        | 1,30 | No  |
| ENSMUSG00000085721 | -6,02E-01 | -1,548294067 | 1,21E+00 | 2,71E-01 | 5,68E-01 | Gm12796       | 0,66 | No  |
| ENSMUSG00000085723 | -2,01E+00 | -2,655099469 | 3,04E+00 | 8,10E-02 | 3,65E-01 | Gm15915       | 0,25 | No  |
| ENSMUSG00000085724 | -2,71E+00 | -2,963182239 | 2,92E+00 | 8,75E-02 | 3,78E-01 | Gm13096       | 0,15 | No  |
| ENSMUSG00000085725 | -3,61E-01 | 1,464328383  | 4,42E+00 | 3,56E-02 | 2,24E-01 | Gm15873       | 0,78 | No  |
| ENSMUSG00000085730 | -1,22E+00 | -3,146113954 | 6,96E-01 | 4,04E-01 | 7,01E-01 | Gm13307       | 0,43 | No  |
| ENSMUSG00000085731 | 3,53E-01  | 3,041893402  | 1,03E+01 | 1,34E-03 | 2,05E-02 | Gm16229       | 1,28 | Yes |
| ENSMUSG00000085732 | -9,07E-01 | -2,548184811 | 7,21E-01 | 3,96E-01 | 6,96E-01 | Gm4279        | 0,53 | No  |
| ENSMUSG00000085733 | -2,15E-01 | 0,31453724   | 6,84E-01 | 4,08E-01 | 7,05E-01 | Arhgap27os1   | 0,86 | No  |
| ENSMUSG00000085735 | 6,88E-02  | -1,051906412 | 2,21E-02 | 8,82E-01 | 1,00E+00 | Mettl5os      | 1,05 | No  |
| ENSMUSG00000085738 | -2,38E-01 | 2,326149422  | 3,10E+00 | 7,83E-02 | 3,57E-01 | Gm12335       | 0,85 | No  |
| ENSMUSG00000085741 | -2,87E-01 | 1,548286752  | 2,88E+00 | 8,95E-02 | 3,79E-01 | 5430405H02Rik | 0,82 | No  |
| ENSMUSG00000085743 | -4,93E-02 | -2,65511425  | 2,19E-03 | 9,63E-01 | 1,00E+00 | 8430419K02Rik | 0,97 | No  |
| ENSMUSG00000085744 | -4,66E-01 | -2,627639862 | 1,96E-01 | 6,58E-01 | 8,81E-01 | Gm12259       | 0,72 | No  |
| ENSMUSG00000085747 | -7,62E-02 | -2,963261877 | 2,64E-03 | 9,59E-01 | 1,00E+00 | Slc13a2os     | 0,95 | No  |
| ENSMUSG00000085748 | -1,90E+00 | -3,033594154 | 1,44E+00 | 2,30E-01 | 5,50E-01 | Gm12280       | 0,27 | No  |
| ENSMUSG00000085749 | -1,84E-01 | -2,185646308 | 6,10E-02 | 8,05E-01 | 9,63E-01 | Gm12843       | 0,88 | No  |
| ENSMUSG00000085750 | 3,39E-01  | -2,548243096 | 1,17E-01 | 7,32E-01 | 9,23E-01 | Gm14009       | 1,26 | No  |
| ENSMUSG00000085754 | 5,61E-02  | 4,705838494  | 5,05E-01 | 4,77E-01 | 7,65E-01 | Gm15886       | 1,04 | No  |
| ENSMUSG00000085755 | -1,92E+00 | -3,070132283 | 1,46E+00 | 2,27E-01 | 5,50E-01 | Gm13496       | 0,26 | No  |
| ENSMUSG00000085759 | -2,66E+00 | -2,831907248 | 2,82E+00 | 9,30E-02 | 3,83E-01 | 1700061E18Rik | 0,16 | No  |
| ENSMUSG00000085760 | 3,64E-01  | -2,070145389 | 2,35E-01 | 6,28E-01 | 8,61E-01 | Gm14302       | 1,29 | No  |
| ENSMUSG00000085761 | -2,63E-01 | -1,107663709 | 3,45E-01 | 5,57E-01 | 8,21E-01 | 4930455G09Rik | 0,83 | No  |
| ENSMUSG00000085762 | -4,39E-02 | -0,121892299 | 1,96E-02 | 8,89E-01 | 1,00E+00 | Lrrc75aos2    | 0,97 | No  |
| ENSMUSG00000085763 | -2,98E-02 | -2,355513897 | 1,05E-03 | 9,74E-01 | 1,00E+00 | Smc2os        | 0,98 | No  |
| ENSMUSG00000085765 | -5,58E-01 | -1,355512844 | 1,33E+00 | 2,49E-01 | 5,50E-01 | Gm12333       | 0,68 | No  |
| ENSMUSG00000085766 | -1,35E+00 | -2,83195614  | 1,14E+00 | 2,86E-01 | 5,82E-01 | 2810430I11Rik | 0,39 | No  |

|                    |           |              |           |          |          |               |      |     |
|--------------------|-----------|--------------|-----------|----------|----------|---------------|------|-----|
| ENSMUSG00000085767 | -7,37E-02 | 3,938523214  | 6,72E-01  | 4,12E-01 | 7,08E-01 | Gm13563       | 0,95 | No  |
| ENSMUSG00000085768 | -1,90E+00 | -2,963262532 | 1,44E+00  | 2,31E-01 | 5,50E-01 | Gm13707       | 0,27 | No  |
| ENSMUSG00000085771 | -3,95E-01 | -1,247035483 | 6,54E-01  | 4,19E-01 | 7,14E-01 | C230066G23Rik | 0,76 | No  |
| ENSMUSG00000085772 | -3,00E-01 | -0,847733315 | 5,44E-01  | 4,61E-01 | 7,50E-01 | D630024D03Rik | 0,81 | No  |
| ENSMUSG00000085776 | 1,26E+00  | -1,929312715 | 3,36E+00  | 6,67E-02 | 3,25E-01 | 5430402O13Rik | 2,40 | No  |
| ENSMUSG00000085779 | 2,89E+00  | -2,998047768 | 3,32E+00  | 6,85E-02 | 3,29E-01 | Atcayos       | 7,44 | No  |
| ENSMUSG00000085781 | -1,87E+00 | -3,033619006 | 1,41E+00  | 2,36E-01 | 5,50E-01 | Gm15640       | 0,27 | No  |
| ENSMUSG00000085782 | 2,42E-01  | -2,226319961 | 7,37E-02  | 7,86E-01 | 9,52E-01 | Gm15624       | 1,18 | No  |
| ENSMUSG00000085783 | -3,29E-02 | 6,242452279  | 2,65E-01  | 6,07E-01 | 8,50E-01 | Gm9816        | 0,98 | No  |
| ENSMUSG00000085785 | 9,01E-03  | -3,107646452 | -5,16E-10 | 1,00E+00 | 1,00E+00 | Sox5os3       | 1,01 | No  |
| ENSMUSG00000085786 | -2,26E-01 | 2,683642995  | 3,67E+00  | 5,56E-02 | 2,89E-01 | Gm15987       | 0,85 | No  |
| ENSMUSG00000085787 | -6,23E-03 | 4,457515092  | 5,89E-03  | 9,39E-01 | 1,00E+00 | Gm13092       | 1,00 | No  |
| ENSMUSG00000085788 | 1,98E-01  | 3,211125875  | 3,59E+00  | 5,83E-02 | 2,98E-01 | 4930470G03Rik | 1,15 | No  |
| ENSMUSG00000085793 | -3,49E-02 | 2,775333144  | 8,85E-02  | 7,66E-01 | 9,40E-01 | Lin52         | 0,98 | No  |
| ENSMUSG00000085794 | 1,85E+00  | -3,107657832 | 1,35E+00  | 2,46E-01 | 5,50E-01 | Vax2os        | 3,61 | No  |
| ENSMUSG00000085795 | 1,93E-01  | 7,928672754  | 1,08E+01  | 9,90E-04 | 1,60E-02 | Zfp703        | 1,14 | Yes |
| ENSMUSG00000085799 | -1,33E+00 | -2,711695278 | 1,10E+00  | 2,94E-01 | 5,89E-01 | Gm6963        | 0,40 | No  |
| ENSMUSG00000085802 | -2,27E-01 | 1,297102649  | 1,50E+00  | 2,21E-01 | 5,50E-01 | Gm16059       | 0,85 | No  |
| ENSMUSG00000085803 | 1,84E+00  | -3,033632273 | 1,33E+00  | 2,49E-01 | 5,50E-01 | Gm12056       | 3,58 | No  |
| ENSMUSG00000085807 | 3,34E-01  | -1,378369188 | 4,76E-01  | 4,90E-01 | 7,77E-01 | Ube4bos2      | 1,26 | No  |
| ENSMUSG00000085810 | 2,03E+00  | -2,627692396 | 3,19E+00  | 7,42E-02 | 3,46E-01 | Gm16325       | 4,09 | No  |
| ENSMUSG00000085811 | 8,44E-01  | -2,548158291 | 6,20E-01  | 4,31E-01 | 7,25E-01 | Cep112it      | 1,80 | No  |
| ENSMUSG00000085812 | -2,88E-01 | 1,596529572  | 2,78E+00  | 9,57E-02 | 3,86E-01 | Gm15843       | 0,82 | No  |
| ENSMUSG00000085815 | 2,19E-01  | -2,627633903 | 3,49E-02  | 8,52E-01 | 9,90E-01 | Gm13548       | 1,16 | No  |
| ENSMUSG00000085819 | 4,26E-02  | 2,469086822  | 1,05E-01  | 7,46E-01 | 9,29E-01 | Ube4bos1      | 1,03 | No  |
| ENSMUSG00000085823 | -2,35E-01 | 2,050169819  | 2,47E+00  | 1,16E-01 | 4,22E-01 | Gm13012       | 0,85 | No  |
| ENSMUSG00000085824 | 3,14E-02  | -3,107617333 | -7,69E-10 | 1,00E+00 | 1,00E+00 | Platr9        | 1,02 | No  |
| ENSMUSG00000085826 | 3,40E-01  | -1,146079326 | 5,90E-01  | 4,42E-01 | 7,34E-01 | Gm15638       | 1,27 | No  |
| ENSMUSG00000085827 | -1,24E+00 | -1,896136603 | 3,67E+00  | 5,54E-02 | 2,88E-01 | Gm11290       | 0,42 | No  |
| ENSMUSG00000085828 | 7,44E-01  | -1,614106772 | 1,43E+00  | 2,32E-01 | 5,50E-01 | Gm15612       | 1,68 | No  |
| ENSMUSG00000085829 | -3,96E-01 | 0,832015257  | 3,19E+00  | 7,43E-02 | 3,47E-01 | Gm4285        | 0,76 | No  |
| ENSMUSG00000085830 | -1,03E+00 | -2,165729683 | 1,63E+00  | 2,01E-01 | 5,50E-01 | Grin1os       | 0,49 | No  |

|                    |           |              |           |          |          |               |      |     |
|--------------------|-----------|--------------|-----------|----------|----------|---------------|------|-----|
| ENSMUSG00000085837 | 1,41E+00  | -2,9980323   | 9,26E-01  | 3,36E-01 | 6,37E-01 | Kcnmb4os2     | 2,66 | No  |
| ENSMUSG00000085840 | -2,71E+00 | -3,033620915 | 2,92E+00  | 8,75E-02 | 3,78E-01 | Gm11261       | 0,15 | No  |
| ENSMUSG00000085842 | 5,85E-01  | -3,070180618 | 1,35E-01  | 7,14E-01 | 9,12E-01 | Pard3bos1     | 1,50 | No  |
| ENSMUSG00000085843 | -1,87E+00 | -3,107637761 | 1,39E+00  | 2,38E-01 | 5,50E-01 | Kank4os       | 0,27 | No  |
| ENSMUSG00000085846 | -1,34E+00 | -2,831974452 | 1,12E+00  | 2,89E-01 | 5,85E-01 | Gm15597       | 0,39 | No  |
| ENSMUSG00000085847 | -3,40E+00 | -2,655064935 | 5,02E+00  | 2,51E-02 | 1,75E-01 | Gm14540       | 0,09 | No  |
| ENSMUSG00000085852 | 1,81E-01  | 0,087382947  | 3,89E-01  | 5,33E-01 | 8,06E-01 | Gm13807       | 1,13 | No  |
| ENSMUSG00000085857 | -1,77E-01 | -2,12674615  | 5,25E-02  | 8,19E-01 | 9,71E-01 | Gm15392       | 0,88 | No  |
| ENSMUSG00000085860 | 5,68E-02  | -1,963281316 | 7,85E-03  | 9,29E-01 | 1,00E+00 | 2410003L11Rik | 1,04 | No  |
| ENSMUSG00000085861 | 7,44E-01  | -2,831978731 | 3,02E-01  | 5,83E-01 | 8,38E-01 | 1700016G14Rik | 1,68 | No  |
| ENSMUSG00000085862 | 1,00E+00  | -2,711704015 | 7,50E-01  | 3,87E-01 | 6,87E-01 | Gm13483       | 2,00 | No  |
| ENSMUSG00000085866 | -1,89E+00 | -3,1076441   | 1,42E+00  | 2,33E-01 | 5,50E-01 | Gm15218       | 0,27 | No  |
| ENSMUSG00000085872 | -1,11E+00 | -2,86369943  | 7,29E-01  | 3,93E-01 | 6,93E-01 | Gm11505       | 0,46 | No  |
| ENSMUSG00000085873 | -4,28E-01 | 0,638793771  | 3,37E+00  | 6,66E-02 | 3,25E-01 | Ttc39aos1     | 0,74 | No  |
| ENSMUSG00000085875 | 1,09E-01  | -0,296722258 | 1,20E-01  | 7,29E-01 | 9,20E-01 | Gm12905       | 1,08 | No  |
| ENSMUSG00000085876 | -1,98E-02 | -3,033655952 | 2,83E-11  | 1,00E+00 | 1,00E+00 | Gm12409       | 0,99 | No  |
| ENSMUSG00000085881 | 9,01E-03  | -3,107646452 | -5,16E-10 | 1,00E+00 | 1,00E+00 | Gm15912       | 1,01 | No  |
| ENSMUSG00000085882 | -2,43E-02 | 2,441710015  | 3,42E-02  | 8,53E-01 | 9,91E-01 | 2610507I01Rik | 0,98 | No  |
| ENSMUSG00000085884 | -1,02E+00 | -0,748250477 | 5,74E+00  | 1,66E-02 | 1,34E-01 | Gm15342       | 0,49 | No  |
| ENSMUSG00000085885 | 2,16E-01  | 0,64428365   | 8,26E-01  | 3,63E-01 | 6,64E-01 | Gm11906       | 1,16 | No  |
| ENSMUSG00000085886 | 2,24E+00  | -3,070190421 | 1,92E+00  | 1,66E-01 | 5,19E-01 | D030047H15Rik | 4,73 | No  |
| ENSMUSG00000085887 | 4,26E-01  | 0,417859429  | 2,91E+00  | 8,82E-02 | 3,79E-01 | Arhgap27os3   | 1,34 | No  |
| ENSMUSG00000085889 | 1,02E+00  | -2,311246431 | 1,34E+00  | 2,47E-01 | 5,50E-01 | 1700054M17Rik | 2,03 | No  |
| ENSMUSG00000085890 | 3,74E-02  | 1,909458554  | 5,65E-02  | 8,12E-01 | 9,67E-01 | Tnfsf13os     | 1,03 | No  |
| ENSMUSG00000085893 | -4,77E-02 | 3,890743907  | 2,70E-01  | 6,03E-01 | 8,48E-01 | Gm12091       | 0,97 | No  |
| ENSMUSG00000085894 | 4,01E-02  | 4,932523079  | 2,85E-01  | 5,94E-01 | 8,43E-01 | Gm15832       | 1,03 | No  |
| ENSMUSG00000085897 | -1,72E+00 | -2,548189507 | 2,05E+00  | 1,52E-01 | 4,94E-01 | Gm11604       | 0,30 | No  |
| ENSMUSG00000085898 | 1,89E+00  | -3,033614598 | 1,38E+00  | 2,40E-01 | 5,50E-01 | Gm6689        | 3,70 | No  |
| ENSMUSG00000085900 | 9,04E-02  | -1,929324536 | 1,80E-02  | 8,93E-01 | 1,00E+00 | A930041C12Rik | 1,06 | No  |
| ENSMUSG00000085902 | -1,94E+00 | -3,107619243 | 1,50E+00  | 2,21E-01 | 5,50E-01 | Gm12200       | 0,26 | No  |
| ENSMUSG00000085903 | -1,34E+00 | -2,832021583 | 1,12E+00  | 2,89E-01 | 5,85E-01 | Gm15340       | 0,40 | No  |
| ENSMUSG00000085912 | -5,48E-01 | 1,674303262  | 1,12E+01  | 8,27E-04 | 1,38E-02 | Trp53cor1     | 0,68 | Yes |

|                    |           |              |           |          |          |               |      |    |
|--------------------|-----------|--------------|-----------|----------|----------|---------------|------|----|
| ENSMUSG00000085913 | -1,10E-01 | 5,89175784   | 2,78E+00  | 9,56E-02 | 3,86E-01 | Gm15601       | 0,93 | No |
| ENSMUSG00000085914 | -3,96E-01 | -1,770669257 | 4,91E-01  | 4,84E-01 | 7,71E-01 | Gm14320       | 0,76 | No |
| ENSMUSG00000085917 | -2,82E-02 | 4,765044873  | 1,36E-01  | 7,12E-01 | 9,11E-01 | Gm15899       | 0,98 | No |
| ENSMUSG00000085918 | -5,39E-01 | -2,800985235 | 2,26E-01  | 6,35E-01 | 8,66E-01 | Gm13032       | 0,69 | No |
| ENSMUSG00000085922 | 1,17E+00  | -3,14612376  | 6,40E-01  | 4,24E-01 | 7,18E-01 | Fhad1os2      | 2,26 | No |
| ENSMUSG00000085926 | -3,83E-02 | -3,107651936 | -7,91E-11 | 1,00E+00 | 1,00E+00 | Gm12299       | 0,97 | No |
| ENSMUSG00000085927 | 3,08E-01  | -1,051774518 | 4,50E-01  | 5,02E-01 | 7,87E-01 | Gm15888       | 1,24 | No |
| ENSMUSG00000085929 | -7,55E-01 | -1,378331492 | 2,34E+00  | 1,26E-01 | 4,44E-01 | Gm13421       | 0,59 | No |
| ENSMUSG00000085931 | 2,74E-02  | -3,033621357 | 9,16E-12  | 1,00E+00 | 1,00E+00 | Gm12648       | 1,02 | No |
| ENSMUSG00000085932 | -1,72E+00 | -2,831983071 | 2,04E+00  | 1,53E-01 | 4,96E-01 | Gm15556       | 0,30 | No |
| ENSMUSG00000085936 | -2,63E-02 | -3,033653157 | 2,33E-04  | 9,88E-01 | 1,00E+00 | 2610307P16Rik | 0,98 | No |
| ENSMUSG00000085938 | 1,21E+00  | -2,896162599 | 9,04E-01  | 3,42E-01 | 6,42E-01 | Gm14371       | 2,31 | No |
| ENSMUSG00000085939 | -5,46E-03 | 9,091014465  | 9,23E-03  | 9,23E-01 | 1,00E+00 | Cd63-ps       | 1,00 | No |
| ENSMUSG00000085941 | -2,03E-01 | 1,002215497  | 9,68E-01  | 3,25E-01 | 6,26E-01 | Gm11201       | 0,87 | No |
| ENSMUSG00000085944 | 1,82E+00  | -3,033661385 | 1,31E+00  | 2,52E-01 | 5,50E-01 | 1700003D09Rik | 3,54 | No |
| ENSMUSG00000085946 | 9,01E-03  | -3,107646452 | -5,16E-10 | 1,00E+00 | 1,00E+00 | AA387200      | 1,01 | No |
| ENSMUSG00000085949 | 1,85E+00  | -3,107657832 | 1,35E+00  | 2,46E-01 | 5,50E-01 | Gm14275       | 3,61 | No |
| ENSMUSG00000085950 | -2,27E+00 | -2,548203305 | 4,18E+00  | 4,08E-02 | 2,39E-01 | Gm13589       | 0,21 | No |
| ENSMUSG00000085952 | 1,85E+00  | -2,963264462 | 1,34E+00  | 2,48E-01 | 5,50E-01 | Gm12315       | 3,59 | No |
| ENSMUSG00000085955 | -2,16E-01 | 0,721475206  | 8,69E-01  | 3,51E-01 | 6,53E-01 | Gm12356       | 0,86 | No |
| ENSMUSG00000085956 | 6,70E-01  | -2,226306687 | 6,51E-01  | 4,20E-01 | 7,15E-01 | 4930481B07Rik | 1,59 | No |
| ENSMUSG00000085957 | -1,58E-01 | -1,436654497 | 1,02E-01  | 7,50E-01 | 9,31E-01 | Syna          | 0,90 | No |
| ENSMUSG00000085958 | -1,58E+00 | -1,896161335 | 5,69E+00  | 1,71E-02 | 1,36E-01 | A930019D19Rik | 0,33 | No |
| ENSMUSG00000085961 | -1,31E+00 | -2,89612966  | 1,07E+00  | 3,00E-01 | 5,97E-01 | Gm15904       | 0,40 | No |
| ENSMUSG00000085962 | -9,70E-02 | 2,452371786  | 5,49E-01  | 4,59E-01 | 7,48E-01 | Gm16984       | 0,93 | No |
| ENSMUSG00000085965 | -2,63E-02 | -3,033653157 | 2,33E-04  | 9,88E-01 | 1,00E+00 | 2310016D23Rik | 0,98 | No |
| ENSMUSG00000085967 | -1,92E+00 | -3,033623267 | 1,46E+00  | 2,27E-01 | 5,50E-01 | Gm12530       | 0,26 | No |
| ENSMUSG00000085971 | -1,36E+00 | -1,627584911 | 5,94E+00  | 1,48E-02 | 1,25E-01 | Gm15411       | 0,39 | No |
| ENSMUSG00000085972 | 1,87E+00  | -3,107639691 | 1,38E+00  | 2,40E-01 | 5,50E-01 | 1110028F11Rik | 3,67 | No |
| ENSMUSG00000085975 | -7,10E-01 | -2,448683756 | 5,64E-01  | 4,53E-01 | 7,42E-01 | Gm13572       | 0,61 | No |
| ENSMUSG00000085977 | 3,89E-02  | 1,669719012  | 4,99E-02  | 8,23E-01 | 9,73E-01 | Gm5970        | 1,03 | No |
| ENSMUSG00000085984 | -1,63E-01 | 1,388976423  | 8,28E-01  | 3,63E-01 | 6,64E-01 | 1700001G11Rik | 0,89 | No |

|                    |           |              |           |          |          |               |      |     |
|--------------------|-----------|--------------|-----------|----------|----------|---------------|------|-----|
| ENSMUSG00000085987 | -1,87E+00 | -3,107637761 | 1,39E+00  | 2,38E-01 | 5,50E-01 | Gm13403       | 0,27 | No  |
| ENSMUSG00000085990 | -3,61E-02 | 5,163166377  | 2,50E-01  | 6,17E-01 | 8,55E-01 | Gm16731       | 0,98 | No  |
| ENSMUSG00000085991 | 1,84E+00  | -3,033632273 | 1,33E+00  | 2,49E-01 | 5,50E-01 | Gm11479       | 3,58 | No  |
| ENSMUSG00000085992 | 7,41E-01  | -2,655121463 | 2,98E-01  | 5,85E-01 | 8,38E-01 | Gm11515       | 1,67 | No  |
| ENSMUSG00000085995 | 3,48E-01  | 2,092219     | 5,71E+00  | 1,69E-02 | 1,36E-01 | Gm2788        | 1,27 | No  |
| ENSMUSG00000085996 | -3,00E-01 | -1,655158798 | 2,72E-01  | 6,02E-01 | 8,48E-01 | A830012C17Rik | 0,81 | No  |
| ENSMUSG00000085999 | -1,87E+00 | -2,963257051 | 1,41E+00  | 2,35E-01 | 5,50E-01 | Gm13411       | 0,27 | No  |
| ENSMUSG00000086001 | -6,76E-02 | -2,896116699 | 2,02E-03  | 9,64E-01 | 1,00E+00 | Gm13448       | 0,95 | No  |
| ENSMUSG00000086003 | -2,44E+00 | -1,963220415 | 8,36E+00  | 3,84E-03 | 4,59E-02 | B230206L02Rik | 0,18 | Yes |
| ENSMUSG00000086004 | -1,32E+00 | -2,896147787 | 1,09E+00  | 2,97E-01 | 5,93E-01 | Gm7805        | 0,40 | No  |
| ENSMUSG00000086006 | -3,26E+00 | -2,896080046 | 4,48E+00  | 3,43E-02 | 2,18E-01 | Gm13293       | 0,10 | No  |
| ENSMUSG00000086007 | 3,14E-02  | -3,107617333 | -7,69E-10 | 1,00E+00 | 1,00E+00 | 1700057H21Rik | 1,02 | No  |
| ENSMUSG00000086010 | -2,35E+00 | -3,070154922 | 2,16E+00  | 1,42E-01 | 4,76E-01 | Gm15318       | 0,20 | No  |
| ENSMUSG00000086012 | -7,31E-01 | -1,574199869 | 1,88E+00  | 1,70E-01 | 5,26E-01 | Gm15902       | 0,60 | No  |
| ENSMUSG00000086013 | -1,21E-01 | -1,015707269 | 7,40E-02  | 7,86E-01 | 9,52E-01 | Gm15706       | 0,92 | No  |
| ENSMUSG00000086014 | 2,30E+00  | -2,963229614 | 2,02E+00  | 1,55E-01 | 4,99E-01 | Gm16095       | 4,93 | No  |
| ENSMUSG00000086015 | 2,03E-01  | -0,561070101 | 3,27E-01  | 5,67E-01 | 8,29E-01 | 4833417C18Rik | 1,15 | No  |
| ENSMUSG00000086016 | -4,23E-02 | 1,988635036  | 7,94E-02  | 7,78E-01 | 9,47E-01 | 1700084C06Rik | 0,97 | No  |
| ENSMUSG00000086018 | 8,00E-02  | 0,175753997  | 8,96E-02  | 7,65E-01 | 9,39E-01 | Gm13179       | 1,06 | No  |
| ENSMUSG00000086022 | 9,01E-03  | -3,107646452 | -5,16E-10 | 1,00E+00 | 1,00E+00 | Rad51ap2      | 1,01 | No  |
| ENSMUSG00000086027 | 4,08E-01  | -2,247018309 | 1,98E-01  | 6,57E-01 | 8,80E-01 | Gm11250       | 1,33 | No  |
| ENSMUSG00000086028 | 3,17E+00  | -2,963263597 | 4,11E+00  | 4,28E-02 | 2,46E-01 | Gm12243       | 8,99 | No  |
| ENSMUSG00000086032 | -1,82E-01 | -0,414868116 | 2,83E-01  | 5,94E-01 | 8,43E-01 | Gm15929       | 0,88 | No  |
| ENSMUSG00000086035 | -1,90E+00 | -3,033647263 | 1,44E+00  | 2,30E-01 | 5,50E-01 | Gm12610       | 0,27 | No  |
| ENSMUSG00000086039 | 1,10E-02  | -0,344219927 | 1,04E-03  | 9,74E-01 | 1,00E+00 | Gm12227       | 1,01 | No  |
| ENSMUSG00000086040 | 1,85E+00  | -3,107657832 | 1,35E+00  | 2,46E-01 | 5,50E-01 | Wipf3         | 3,61 | No  |
| ENSMUSG00000086041 | -1,07E+00 | -1,755531223 | 2,76E+00  | 9,69E-02 | 3,88E-01 | Gm12869       | 0,48 | No  |
| ENSMUSG00000086043 | -1,08E+00 | -2,77056826  | 6,92E-01  | 4,06E-01 | 7,02E-01 | Gm12473       | 0,47 | No  |
| ENSMUSG00000086047 | -8,02E-02 | -1,497575256 | 2,10E-02  | 8,85E-01 | 1,00E+00 | 9530046B11Rik | 0,95 | No  |
| ENSMUSG00000086049 | -2,40E-01 | -0,21257423  | 5,75E-01  | 4,48E-01 | 7,38E-01 | Gm12735       | 0,85 | No  |
| ENSMUSG00000086050 | 7,54E-01  | -2,963279799 | 3,12E-01  | 5,77E-01 | 8,35E-01 | Gm16045       | 1,69 | No  |
| ENSMUSG00000086052 | 4,47E-01  | -0,284262439 | 1,90E+00  | 1,68E-01 | 5,23E-01 | Gm11802       | 1,36 | No  |

|                    |           |              |           |          |          |               |      |    |
|--------------------|-----------|--------------|-----------|----------|----------|---------------|------|----|
| ENSMUSG00000086054 | -1,89E+00 | -3,1076441   | 1,42E+00  | 2,33E-01 | 5,50E-01 | Hnf1aos1      | 0,27 | No |
| ENSMUSG00000086056 | 9,01E-03  | -3,107646452 | -5,16E-10 | 1,00E+00 | 1,00E+00 | Gm4846        | 1,01 | No |
| ENSMUSG00000086058 | 1,20E+00  | -3,146123991 | 6,74E-01  | 4,12E-01 | 7,07E-01 | Unc45bos      | 2,30 | No |
| ENSMUSG00000086061 | 1,07E+00  | -2,800970876 | 4,88E-01  | 4,85E-01 | 7,72E-01 | Gm13075       | 2,09 | No |
| ENSMUSG00000086063 | -1,89E+00 | -3,1076441   | 1,42E+00  | 2,33E-01 | 5,50E-01 | Gm12257       | 0,27 | No |
| ENSMUSG00000086064 | 1,89E+00  | -3,033614598 | 1,38E+00  | 2,40E-01 | 5,50E-01 | 4930439A04Rik | 3,70 | No |
| ENSMUSG00000086065 | -2,73E+00 | -2,963241672 | 2,94E+00  | 8,62E-02 | 3,78E-01 | Gm16180       | 0,15 | No |
| ENSMUSG00000086067 | -4,07E-01 | -2,89614338  | 1,02E-01  | 7,49E-01 | 9,31E-01 | Gm16183       | 0,75 | No |
| ENSMUSG00000086069 | -6,82E-01 | -1,896204758 | 1,06E+00  | 3,03E-01 | 6,00E-01 | Gm13708       | 0,62 | No |
| ENSMUSG00000086074 | 4,25E-01  | -2,65518721  | 1,41E-01  | 7,07E-01 | 9,08E-01 | Gm13274       | 1,34 | No |
| ENSMUSG00000086075 | -5,80E-01 | -1,136494954 | 1,53E+00  | 2,16E-01 | 5,50E-01 | Gm15728       | 0,67 | No |
| ENSMUSG00000086076 | -7,30E-02 | -2,268087892 | 8,65E-03  | 9,26E-01 | 1,00E+00 | Ncr3-ps       | 0,95 | No |
| ENSMUSG00000086083 | 6,58E-03  | 0,80419147   | 8,51E-04  | 9,77E-01 | 1,00E+00 | Gm15829       | 1,00 | No |
| ENSMUSG00000086089 | -8,89E-01 | -2,832016389 | 4,33E-01  | 5,11E-01 | 7,94E-01 | Gm11640       | 0,54 | No |
| ENSMUSG00000086090 | 1,77E-01  | 0,580964032  | 5,36E-01  | 4,64E-01 | 7,53E-01 | Gm12531       | 1,13 | No |
| ENSMUSG00000086092 | 2,65E+00  | -3,033655087 | 2,73E+00  | 9,86E-02 | 3,91E-01 | Gm15323       | 6,30 | No |
| ENSMUSG00000086095 | -1,36E+00 | -2,832033394 | 1,17E+00  | 2,80E-01 | 5,77E-01 | Gm15328       | 0,39 | No |
| ENSMUSG00000086098 | -8,78E-02 | -2,963255397 | 3,51E-03  | 9,53E-01 | 1,00E+00 | Gm14291       | 0,94 | No |
| ENSMUSG00000086103 | 8,49E-01  | -0,896376243 | 4,12E+00  | 4,24E-02 | 2,45E-01 | Gm11832       | 1,80 | No |
| ENSMUSG00000086107 | 8,99E-02  | 0,948254518  | 1,79E-01  | 6,73E-01 | 8,90E-01 | Gm16312       | 1,06 | No |
| ENSMUSG00000086108 | -2,17E-01 | 0,517908349  | 8,87E-01  | 3,46E-01 | 6,47E-01 | Gm5602        | 0,86 | No |
| ENSMUSG00000086109 | -2,97E-01 | 0,183605693  | 1,25E+00  | 2,64E-01 | 5,59E-01 | Gm13391       | 0,81 | No |
| ENSMUSG00000086111 | 2,97E-01  | -1,088950205 | 5,09E-01  | 4,75E-01 | 7,64E-01 | Gm15326       | 1,23 | No |
| ENSMUSG00000086118 | 1,87E+00  | -3,107639691 | 1,38E+00  | 2,40E-01 | 5,50E-01 | Gm14169       | 3,67 | No |
| ENSMUSG00000086119 | -7,75E-02 | -0,155777633 | 6,18E-02  | 8,04E-01 | 9,62E-01 | Gm2415        | 0,95 | No |
| ENSMUSG00000086121 | 7,28E-01  | -0,367045089 | 4,67E+00  | 3,06E-02 | 2,02E-01 | Gm16068       | 1,66 | No |
| ENSMUSG00000086123 | 6,91E-01  | -2,226300943 | 6,92E-01  | 4,05E-01 | 7,02E-01 | Gm16060       | 1,61 | No |
| ENSMUSG00000086124 | -7,36E-02 | -0,322017633 | 4,53E-02  | 8,31E-01 | 9,78E-01 | A530076I17Rik | 0,95 | No |
| ENSMUSG00000086127 | -8,33E-01 | -2,896090741 | 3,80E-01  | 5,37E-01 | 8,09E-01 | Gm11934       | 0,56 | No |
| ENSMUSG00000086130 | -3,16E-01 | -1,146178339 | 4,06E-01  | 5,24E-01 | 8,01E-01 | Gm16211       | 0,80 | No |
| ENSMUSG00000086133 | 1,86E+00  | -3,033661846 | 1,35E+00  | 2,46E-01 | 5,50E-01 | Gm16331       | 3,62 | No |
| ENSMUSG00000086134 | 8,91E-02  | -0,593961837 | 5,68E-02  | 8,12E-01 | 9,67E-01 | Gm16159       | 1,06 | No |

|                    |           |              |           |          |          |               |      |     |
|--------------------|-----------|--------------|-----------|----------|----------|---------------|------|-----|
| ENSMUSG00000086139 | -6,20E-02 | -2,472969446 | 3,50E-03  | 9,53E-01 | 1,00E+00 | Gm11211       | 0,96 | No  |
| ENSMUSG00000086145 | -1,68E-01 | -1,522597901 | 8,95E-02  | 7,65E-01 | 9,39E-01 | Gm15479       | 0,89 | No  |
| ENSMUSG00000086146 | -1,49E+00 | -2,401314271 | 2,29E+00  | 1,31E-01 | 4,54E-01 | Gm15729       | 0,36 | No  |
| ENSMUSG00000086147 | 2,97E-01  | -1,600631774 | 2,65E-01  | 6,06E-01 | 8,50E-01 | Zfp989        | 1,23 | No  |
| ENSMUSG00000086149 | -1,44E-01 | 1,023620988  | 4,70E-01  | 4,93E-01 | 7,79E-01 | Gm15598       | 0,90 | No  |
| ENSMUSG00000086150 | -1,68E-02 | -0,554704207 | 1,96E-03  | 9,65E-01 | 1,00E+00 | Bach2os       | 0,99 | No  |
| ENSMUSG00000086151 | -1,87E+00 | -2,963234282 | 1,41E+00  | 2,35E-01 | 5,50E-01 | Gm5698        | 0,27 | No  |
| ENSMUSG00000086154 | -2,68E+00 | -2,963253845 | 2,85E+00  | 9,15E-02 | 3,82E-01 | Gm16196       | 0,16 | No  |
| ENSMUSG00000086156 | -2,82E-01 | -0,226155453 | 7,05E-01  | 4,01E-01 | 6,99E-01 | Gm15354       | 0,82 | No  |
| ENSMUSG00000086158 | -2,74E-01 | 0,69952618   | 1,45E+00  | 2,29E-01 | 5,50E-01 | Ccpg1os       | 0,83 | No  |
| ENSMUSG00000086159 | -3,83E-02 | -3,107651936 | -7,91E-11 | 1,00E+00 | 1,00E+00 | Gm13025       | 0,97 | No  |
| ENSMUSG00000086160 | -1,89E+00 | -3,1076441   | 1,42E+00  | 2,33E-01 | 5,50E-01 | 4933438A12Rik | 0,27 | No  |
| ENSMUSG00000086161 | -1,87E+00 | -3,107637761 | 1,39E+00  | 2,38E-01 | 5,50E-01 | Gm15389       | 0,27 | No  |
| ENSMUSG00000086165 | -2,47E-01 | -2,448707126 | 6,65E-02  | 7,97E-01 | 9,58E-01 | Gm15690       | 0,84 | No  |
| ENSMUSG00000086166 | -3,83E-02 | -3,107651936 | -7,91E-11 | 1,00E+00 | 1,00E+00 | Gm14342       | 0,97 | No  |
| ENSMUSG00000086167 | -8,15E-01 | -1,155824728 | 2,79E+00  | 9,50E-02 | 3,86E-01 | Gm13827       | 0,57 | No  |
| ENSMUSG00000086171 | 5,96E-01  | -2,998041371 | 1,42E-01  | 7,07E-01 | 9,08E-01 | Pcsk2os1      | 1,51 | No  |
| ENSMUSG00000086172 | 1,14E+00  | -2,548192378 | 1,24E+00  | 2,65E-01 | 5,60E-01 | 2700068H02Rik | 2,21 | No  |
| ENSMUSG00000086174 | -6,23E-01 | -0,097968209 | 4,23E+00  | 3,98E-02 | 2,37E-01 | Gm6425        | 0,65 | No  |
| ENSMUSG00000086176 | -1,19E-01 | 1,411252235  | 4,09E-01  | 5,23E-01 | 8,01E-01 | Gm15534       | 0,92 | No  |
| ENSMUSG00000086181 | 2,06E-02  | -3,146103739 | -9,26E-10 | 1,00E+00 | 1,00E+00 | C230034O21Rik | 1,01 | No  |
| ENSMUSG00000086184 | 6,67E-01  | -1,155960677 | 2,06E+00  | 1,51E-01 | 4,93E-01 | Gm12764       | 1,59 | No  |
| ENSMUSG00000086186 | 2,62E+00  | -2,770639037 | 2,66E+00  | 1,03E-01 | 3,95E-01 | Ccdc34os      | 6,16 | No  |
| ENSMUSG00000086187 | 1,86E+00  | -3,033661846 | 1,35E+00  | 2,46E-01 | 5,50E-01 | Gm12860       | 3,62 | No  |
| ENSMUSG00000086189 | 3,14E-02  | -3,107617333 | -7,69E-10 | 1,00E+00 | 1,00E+00 | Gm15462       | 1,02 | No  |
| ENSMUSG00000086191 | 1,90E-01  | -0,366918122 | 3,11E-01  | 5,77E-01 | 8,35E-01 | Zfp652os      | 1,14 | No  |
| ENSMUSG00000086192 | -2,08E-02 | 1,515015372  | 1,39E-02  | 9,06E-01 | 1,00E+00 | Gm13609       | 0,99 | No  |
| ENSMUSG00000086193 | -9,42E-04 | 2,858766631  | 6,52E-05  | 9,94E-01 | 1,00E+00 | Gm11508       | 1,00 | No  |
| ENSMUSG00000086196 | -5,91E-01 | 2,135095886  | 1,77E+01  | 2,54E-05 | 7,63E-04 | Gm13571       | 0,66 | Yes |
| ENSMUSG00000086199 | -2,70E+00 | -2,770580449 | 2,89E+00  | 8,89E-02 | 3,79E-01 | Bcas3os1      | 0,15 | No  |
| ENSMUSG00000086201 | -3,15E-02 | 2,59980832   | 6,05E-02  | 8,06E-01 | 9,63E-01 | Gm6270        | 0,98 | No  |
| ENSMUSG00000086206 | -1,48E+00 | -2,506087347 | 2,70E+00  | 1,00E-01 | 3,92E-01 | Gm13783       | 0,36 | No  |



|                    |           |              |          |          |          |               |       |     |
|--------------------|-----------|--------------|----------|----------|----------|---------------|-------|-----|
| ENSMUSG00000086212 | -4,89E-01 | -0,839766665 | 1,58E+00 | 2,09E-01 | 5,50E-01 | Mkln1os       | 0,71  | No  |
| ENSMUSG00000086213 | 1,18E+00  | -1,998025802 | 2,38E+00 | 1,23E-01 | 4,38E-01 | A330040F15Rik | 2,27  | No  |
| ENSMUSG00000086216 | -1,33E-01 | 2,415029019  | 1,02E+00 | 3,12E-01 | 6,11E-01 | Gm13610       | 0,91  | No  |
| ENSMUSG00000086220 | 1,71E-01  | 0,202919877  | 3,64E-01 | 5,47E-01 | 8,14E-01 | Gm16599       | 1,13  | No  |
| ENSMUSG00000086221 | -2,36E-02 | -2,600663201 | 5,71E-04 | 9,81E-01 | 1,00E+00 | 4930412B13Rik | 0,98  | No  |
| ENSMUSG00000086222 | 1,84E+00  | -3,033649193 | 1,33E+00 | 2,49E-01 | 5,50E-01 | Gm11665       | 3,58  | No  |
| ENSMUSG00000086228 | 4,65E-01  | -1,344525982 | 8,44E-01 | 3,58E-01 | 6,60E-01 | Ubap1l        | 1,38  | No  |
| ENSMUSG00000086229 | -6,94E-02 | 4,373357918  | 6,97E-01 | 4,04E-01 | 7,01E-01 | Gm4887        | 0,95  | No  |
| ENSMUSG00000086231 | -1,33E+00 | -2,655104166 | 1,12E+00 | 2,91E-01 | 5,86E-01 | Rapgef4os3    | 0,40  | No  |
| ENSMUSG00000086234 | 4,02E-01  | -0,065695511 | 1,65E+00 | 1,98E-01 | 5,50E-01 | Usp46os2      | 1,32  | No  |
| ENSMUSG00000086235 | 3,19E-01  | 2,014939491  | 4,35E+00 | 3,70E-02 | 2,28E-01 | Gm16284       | 1,25  | No  |
| ENSMUSG00000086236 | -2,58E-01 | -0,580939755 | 4,75E-01 | 4,91E-01 | 7,77E-01 | 5830418P13Rik | 0,84  | No  |
| ENSMUSG00000086237 | -2,66E-02 | 0,320338333  | 1,04E-02 | 9,19E-01 | 1,00E+00 | Gm15591       | 0,98  | No  |
| ENSMUSG00000086238 | -7,99E-02 | -2,832043572 | 2,69E-03 | 9,59E-01 | 1,00E+00 | Gm14258       | 0,95  | No  |
| ENSMUSG00000086240 | 2,86E-02  | 3,218206744  | 6,99E-02 | 7,92E-01 | 9,55E-01 | Gm7846        | 1,02  | No  |
| ENSMUSG00000086241 | 3,02E-01  | 1,061791077  | 2,23E+00 | 1,36E-01 | 4,64E-01 | 4930483K19Rik | 1,23  | No  |
| ENSMUSG00000086245 | -4,39E-01 | 3,295359534  | 1,83E+01 | 1,85E-05 | 5,78E-04 | Gm16170       | 0,74  | Yes |
| ENSMUSG00000086247 | -6,21E-02 | 2,316798339  | 2,11E-01 | 6,46E-01 | 8,74E-01 | Gm15787       | 0,96  | No  |
| ENSMUSG00000086249 | 3,51E+00  | -2,770613656 | 5,36E+00 | 2,06E-02 | 1,54E-01 | Gm12724       | 11,42 | No  |
| ENSMUSG00000086250 | 2,67E+00  | -3,033636951 | 2,76E+00 | 9,68E-02 | 3,88E-01 | Gm14095       | 6,36  | No  |
| ENSMUSG00000086251 | 1,85E+00  | -3,107657832 | 1,35E+00 | 2,46E-01 | 5,50E-01 | Gm12694       | 3,61  | No  |
| ENSMUSG00000086255 | 2,31E-01  | -1,847792699 | 1,30E-01 | 7,19E-01 | 9,15E-01 | Gm11534       | 1,17  | No  |
| ENSMUSG00000086256 | 7,55E-01  | -2,832032656 | 3,10E-01 | 5,78E-01 | 8,35E-01 | Gm12052       | 1,69  | No  |
| ENSMUSG00000086259 | -1,02E+00 | -0,946091258 | 5,81E+00 | 1,60E-02 | 1,31E-01 | Tmem150cos    | 0,49  | No  |
| ENSMUSG00000086260 | 4,16E-01  | -1,006820014 | 8,07E-01 | 3,69E-01 | 6,70E-01 | Gm16259       | 1,33  | No  |
| ENSMUSG00000086263 | -8,80E-01 | -2,770597684 | 4,23E-01 | 5,15E-01 | 7,97E-01 | 4930519D14Rik | 0,54  | No  |
| ENSMUSG00000086264 | -1,71E+00 | -2,711717372 | 2,04E+00 | 1,53E-01 | 4,96E-01 | Gm15850       | 0,30  | No  |
| ENSMUSG00000086269 | -2,44E-01 | -1,655129706 | 1,94E-01 | 6,60E-01 | 8,82E-01 | Tmcc3os       | 0,84  | No  |
| ENSMUSG00000086277 | -1,87E+00 | -3,107637761 | 1,39E+00 | 2,38E-01 | 5,50E-01 | 4930558K02Rik | 0,27  | No  |
| ENSMUSG00000086279 | 4,41E-01  | -2,71173133  | 1,52E-01 | 6,97E-01 | 9,03E-01 | Gm15634       | 1,36  | No  |
| ENSMUSG00000086287 | 6,59E-01  | -2,146186382 | 7,55E-01 | 3,85E-01 | 6,86E-01 | Gm15972       | 1,58  | No  |
| ENSMUSG00000086288 | 5,56E-02  | 2,623789745  | 2,00E-01 | 6,55E-01 | 8,79E-01 | Gm15265       | 1,04  | No  |

|                    |           |              |          |          |          |               |      |     |
|--------------------|-----------|--------------|----------|----------|----------|---------------|------|-----|
| ENSMUSG00000086289 | -4,14E-02 | 4,716992279  | 2,91E-01 | 5,90E-01 | 8,41E-01 | Gm16933       | 0,97 | No  |
| ENSMUSG00000086290 | -2,59E-01 | 2,350580288  | 3,77E+00 | 5,20E-02 | 2,78E-01 | Snhg12        | 0,84 | No  |
| ENSMUSG00000086291 | -1,64E-01 | -1,268156317 | 1,11E-01 | 7,39E-01 | 9,26E-01 | Gm15513       | 0,89 | No  |
| ENSMUSG00000086292 | 5,93E-01  | -2,711677727 | 2,32E-01 | 6,30E-01 | 8,62E-01 | Gm16052       | 1,51 | No  |
| ENSMUSG00000086296 | -2,52E-01 | 0,045262777  | 8,00E-01 | 3,71E-01 | 6,72E-01 | D030055H07Rik | 0,84 | No  |
| ENSMUSG00000086297 | -1,87E+00 | -3,107637761 | 1,39E+00 | 2,38E-01 | 5,50E-01 | Gm15632       | 0,27 | No  |
| ENSMUSG00000086298 | 2,62E+00  | -3,033654625 | 2,66E+00 | 1,03E-01 | 3,95E-01 | Gm11716       | 6,16 | No  |
| ENSMUSG00000086310 | -1,14E-02 | -3,033635021 | 1,50E-05 | 9,97E-01 | 1,00E+00 | Gm12278       | 0,99 | No  |
| ENSMUSG00000086312 | -2,03E-02 | -0,740879179 | 2,70E-03 | 9,59E-01 | 1,00E+00 | Gm15336       | 0,99 | No  |
| ENSMUSG00000086315 | -1,54E+00 | -2,627576773 | 1,58E+00 | 2,09E-01 | 5,50E-01 | Arl4aos       | 0,34 | No  |
| ENSMUSG00000086320 | -1,13E+00 | -1,711638583 | 3,79E+00 | 5,14E-02 | 2,76E-01 | Gm12840       | 0,46 | No  |
| ENSMUSG00000086321 | -7,58E-01 | -2,448645118 | 6,45E-01 | 4,22E-01 | 7,18E-01 | Gm11413       | 0,59 | No  |
| ENSMUSG00000086322 | -8,21E-02 | 2,617554031  | 4,17E-01 | 5,18E-01 | 7,98E-01 | E130218I03Rik | 0,94 | No  |
| ENSMUSG00000086324 | -7,95E-01 | 5,143686966  | 1,15E+02 | 6,29E-27 | 2,58E-24 | Gm15564       | 0,58 | Yes |
| ENSMUSG00000086326 | -1,94E+00 | -3,107619243 | 1,50E+00 | 2,21E-01 | 5,50E-01 | Gm13200       | 0,26 | No  |
| ENSMUSG00000086327 | -1,06E-01 | 2,444393046  | 6,78E-01 | 4,10E-01 | 7,06E-01 | Slfn5os       | 0,93 | No  |
| ENSMUSG00000086328 | 1,81E+00  | -3,10765737  | 1,28E+00 | 2,58E-01 | 5,50E-01 | 2700033N17Rik | 3,49 | No  |
| ENSMUSG00000086329 | -1,86E-01 | 1,523452121  | 1,09E+00 | 2,97E-01 | 5,92E-01 | Gm14233       | 0,88 | No  |
| ENSMUSG00000086330 | -2,86E-03 | 0,078973571  | 1,05E-04 | 9,92E-01 | 1,00E+00 | 1700007J10Rik | 1,00 | No  |
| ENSMUSG00000086331 | -2,29E-01 | -1,711690456 | 1,16E-01 | 7,33E-01 | 9,23E-01 | Gm16310       | 0,85 | No  |
| ENSMUSG00000086335 | -4,33E+00 | -2,655086814 | 1,01E+01 | 1,52E-03 | 2,25E-02 | Gm12107       | 0,05 | Yes |
| ENSMUSG00000086336 | -1,95E+00 | -3,033628749 | 1,50E+00 | 2,21E-01 | 5,50E-01 | Gm12979       | 0,26 | No  |
| ENSMUSG00000086340 | 1,61E+00  | -2,655179097 | 1,78E+00 | 1,82E-01 | 5,43E-01 | 1810059C17Rik | 3,06 | No  |
| ENSMUSG00000086341 | 4,12E-02  | 1,669352775  | 6,14E-02 | 8,04E-01 | 9,63E-01 | Gm15932       | 1,03 | No  |
| ENSMUSG00000086342 | -3,42E-01 | -1,146064002 | 5,71E-01 | 4,50E-01 | 7,40E-01 | Gm12932       | 0,79 | No  |
| ENSMUSG00000086347 | -9,20E-02 | 2,207277851  | 4,55E-01 | 5,00E-01 | 7,85E-01 | Gm11626       | 0,94 | No  |
| ENSMUSG00000086350 | -2,37E-01 | -1,070157237 | 3,21E-01 | 5,71E-01 | 8,31E-01 | B230369F24Rik | 0,85 | No  |
| ENSMUSG00000086358 | 5,74E-02  | -1,278722817 | 1,33E-02 | 9,08E-01 | 1,00E+00 | Gm13270       | 1,04 | No  |
| ENSMUSG00000086359 | 1,64E-01  | 0,30975954   | 3,96E-01 | 5,29E-01 | 8,05E-01 | 9630013K17Rik | 1,12 | No  |
| ENSMUSG00000086360 | -1,15E-01 | 0,306154607  | 1,75E-01 | 6,76E-01 | 8,91E-01 | Gm16214       | 0,92 | No  |
| ENSMUSG00000086363 | -1,95E+00 | -3,033628749 | 1,50E+00 | 2,21E-01 | 5,50E-01 | A330102I10Rik | 0,26 | No  |
| ENSMUSG00000086365 | 1,87E+00  | -3,107639691 | 1,38E+00 | 2,40E-01 | 5,50E-01 | 4930593C16Rik | 3,67 | No  |

|                    |           |              |           |          |          |               |      |    |
|--------------------|-----------|--------------|-----------|----------|----------|---------------|------|----|
| ENSMUSG00000086368 | 1,37E+00  | -2,311193687 | 1,92E+00  | 1,66E-01 | 5,18E-01 | Gm13830       | 2,59 | No |
| ENSMUSG00000086369 | -1,89E+00 | -3,1076441   | 1,42E+00  | 2,33E-01 | 5,50E-01 | E330017L17Rik | 0,27 | No |
| ENSMUSG00000086373 | -3,37E-01 | -0,863688071 | 7,54E-01  | 3,85E-01 | 6,86E-01 | Gm11978       | 0,79 | No |
| ENSMUSG00000086376 | -3,83E-02 | -3,107651936 | -7,91E-11 | 1,00E+00 | 1,00E+00 | 1700071G01Rik | 0,97 | No |
| ENSMUSG00000086377 | 1,72E-01  | -1,448658538 | 1,21E-01  | 7,28E-01 | 9,20E-01 | 4930529C04Rik | 1,13 | No |
| ENSMUSG00000086381 | -2,66E+00 | -2,99801465  | 2,81E+00  | 9,39E-02 | 3,84E-01 | AV064505      | 0,16 | No |
| ENSMUSG00000086382 | -1,70E+00 | -2,770589202 | 2,00E+00  | 1,57E-01 | 5,03E-01 | Chrna1os      | 0,31 | No |
| ENSMUSG00000086384 | -2,74E+00 | -3,033596063 | 2,99E+00  | 8,38E-02 | 3,71E-01 | Banf2os       | 0,15 | No |
| ENSMUSG00000086387 | -9,11E-01 | -1,311136427 | 3,08E+00  | 7,91E-02 | 3,60E-01 | Gm15563       | 0,53 | No |
| ENSMUSG00000086389 | 1,37E+00  | -2,998028481 | 8,57E-01  | 3,55E-01 | 6,56E-01 | Gm15998       | 2,58 | No |
| ENSMUSG00000086390 | -1,03E+00 | -2,107529353 | 2,01E+00  | 1,56E-01 | 5,01E-01 | 1810019D21Rik | 0,49 | No |
| ENSMUSG00000086392 | 1,60E-01  | -0,541838518 | 1,87E-01  | 6,66E-01 | 8,85E-01 | Mccc1os       | 1,12 | No |
| ENSMUSG00000086395 | -1,21E+00 | -2,655139426 | 1,40E+00  | 2,37E-01 | 5,50E-01 | A630014C17Rik | 0,43 | No |
| ENSMUSG00000086399 | 8,75E-02  | -0,627622428 | 5,83E-02  | 8,09E-01 | 9,65E-01 | Gm16144       | 1,06 | No |
| ENSMUSG00000086401 | -1,90E-01 | 1,400002863  | 1,07E+00  | 3,01E-01 | 5,97E-01 | Gm15559       | 0,88 | No |
| ENSMUSG00000086405 | -5,98E-01 | -2,655161804 | 2,80E-01  | 5,97E-01 | 8,45E-01 | 9330198N18Rik | 0,66 | No |
| ENSMUSG00000086407 | -1,94E-01 | 0,095831565  | 4,31E-01  | 5,12E-01 | 7,94E-01 | Gm14123       | 0,87 | No |
| ENSMUSG00000086409 | -8,62E-02 | 0,83411717   | 1,62E-01  | 6,88E-01 | 8,98E-01 | Gm13898       | 0,94 | No |
| ENSMUSG00000086410 | -1,24E+00 | -2,289530844 | 2,56E+00  | 1,10E-01 | 4,06E-01 | Gm16158       | 0,42 | No |
| ENSMUSG00000086411 | -5,52E-01 | -2,655136181 | 2,39E-01  | 6,25E-01 | 8,59E-01 | Gm14236       | 0,68 | No |
| ENSMUSG00000086414 | -8,15E-01 | -1,697302309 | 1,77E+00  | 1,83E-01 | 5,46E-01 | Gm15645       | 0,57 | No |
| ENSMUSG00000086417 | 2,62E+00  | -3,033654625 | 2,66E+00  | 1,03E-01 | 3,95E-01 | Gm12996       | 6,16 | No |
| ENSMUSG00000086418 | -1,66E-01 | -2,289511657 | 4,60E-02  | 8,30E-01 | 9,77E-01 | Gm13362       | 0,89 | No |
| ENSMUSG00000086420 | 1,72E-02  | -1,246803355 | 1,28E-03  | 9,71E-01 | 1,00E+00 | Gm8865        | 1,01 | No |
| ENSMUSG00000086421 | 4,12E-01  | 1,727600374  | 5,98E+00  | 1,45E-02 | 1,23E-01 | Gm14091       | 1,33 | No |
| ENSMUSG00000086424 | 3,70E-01  | 0,045173891  | 1,57E+00  | 2,10E-01 | 5,50E-01 | Gm15569       | 1,29 | No |
| ENSMUSG00000086425 | -2,74E-01 | -0,711933846 | 5,03E-01  | 4,78E-01 | 7,66E-01 | F730016J06Rik | 0,83 | No |
| ENSMUSG00000086429 | -1,99E-01 | 2,816538477  | 2,80E+00  | 9,44E-02 | 3,84E-01 | Gt(ROSA)26Sor | 0,87 | No |
| ENSMUSG00000086430 | -7,42E-01 | -0,912501137 | 3,23E+00  | 7,24E-02 | 3,41E-01 | 4930551O13Rik | 0,60 | No |
| ENSMUSG00000086433 | -1,92E+00 | -2,600683391 | 1,45E+00  | 2,28E-01 | 5,50E-01 | Rsf1os1       | 0,27 | No |
| ENSMUSG00000086434 | 1,39E-01  | 1,960629158  | 8,15E-01  | 3,67E-01 | 6,68E-01 | Gm15200       | 1,10 | No |
| ENSMUSG00000086436 | -1,89E-01 | 3,126859163  | 3,01E+00  | 8,25E-02 | 3,69E-01 | Gm13690       | 0,88 | No |

|                    |           |              |           |          |          |               |      |    |
|--------------------|-----------|--------------|-----------|----------|----------|---------------|------|----|
| ENSMUSG00000086438 | -6,79E-01 | -3,070168314 | 1,83E-01  | 6,69E-01 | 8,87E-01 | Asb17os       | 0,62 | No |
| ENSMUSG00000086439 | -1,87E+00 | -3,107637761 | 1,39E+00  | 2,38E-01 | 5,50E-01 | Gm12069       | 0,27 | No |
| ENSMUSG00000086442 | -6,90E-01 | -1,740961176 | 1,36E+00  | 2,43E-01 | 5,50E-01 | Gm11722       | 0,62 | No |
| ENSMUSG00000086443 | -1,60E+00 | -1,683007356 | 6,85E+00  | 8,86E-03 | 8,54E-02 | 4933421A08Rik | 0,33 | No |
| ENSMUSG00000086446 | 4,49E-01  | -1,770642685 | 4,74E-01  | 4,91E-01 | 7,77E-01 | Prkag2os1     | 1,37 | No |
| ENSMUSG00000086447 | 8,80E-01  | -2,26816942  | 1,19E+00  | 2,75E-01 | 5,72E-01 | Gm13522       | 1,84 | No |
| ENSMUSG00000086448 | 1,59E+00  | -2,497601713 | 2,23E+00  | 1,35E-01 | 4,63E-01 | 9330162012Rik | 3,00 | No |
| ENSMUSG00000086451 | -1,87E+00 | -3,107637761 | 1,39E+00  | 2,38E-01 | 5,50E-01 | 4933431K23Rik | 0,27 | No |
| ENSMUSG00000086453 | -4,66E-03 | 1,83851795   | 8,32E-04  | 9,77E-01 | 1,00E+00 | Gm11457       | 1,00 | No |
| ENSMUSG00000086454 | 3,15E+00  | -2,832016821 | 4,04E+00  | 4,44E-02 | 2,51E-01 | Platr14       | 8,86 | No |
| ENSMUSG00000086455 | -1,36E+00 | -2,896135617 | 1,16E+00  | 2,82E-01 | 5,78E-01 | Gm11815       | 0,39 | No |
| ENSMUSG00000086459 | 5,19E-02  | -0,187304984 | 2,70E-02  | 8,69E-01 | 1,00E+00 | 1700030C12Rik | 1,04 | No |
| ENSMUSG00000086460 | 1,24E+00  | -3,033603422 | 6,90E-01  | 4,06E-01 | 7,02E-01 | Gm12236       | 2,36 | No |
| ENSMUSG00000086464 | -5,93E-01 | -0,683020244 | 2,06E+00  | 1,51E-01 | 4,93E-01 | Gm15835       | 0,66 | No |
| ENSMUSG00000086465 | 1,22E+00  | -2,107750383 | 2,81E+00  | 9,38E-02 | 3,83E-01 | Gm16049       | 2,32 | No |
| ENSMUSG00000086468 | -3,44E-02 | -1,460869902 | 4,21E-03  | 9,48E-01 | 1,00E+00 | Etaa1os       | 0,98 | No |
| ENSMUSG00000086470 | -2,68E+00 | -3,033645766 | 2,84E+00  | 9,17E-02 | 3,82E-01 | Gm12580       | 0,16 | No |
| ENSMUSG00000086472 | 9,97E-02  | 1,738244411  | 3,73E-01  | 5,41E-01 | 8,11E-01 | Gm16172       | 1,07 | No |
| ENSMUSG00000086474 | -1,86E+00 | -3,033612668 | 1,39E+00  | 2,38E-01 | 5,50E-01 | 9130204K15Rik | 0,28 | No |
| ENSMUSG00000086475 | -2,67E+00 | -2,896145101 | 2,83E+00  | 9,25E-02 | 3,83E-01 | Platr13       | 0,16 | No |
| ENSMUSG00000086477 | -9,85E-01 | -1,26801841  | 3,69E+00  | 5,49E-02 | 2,87E-01 | Gm15506       | 0,51 | No |
| ENSMUSG00000086479 | -1,87E+00 | -2,44866499  | 4,08E+00  | 4,33E-02 | 2,48E-01 | Gm16014       | 0,27 | No |
| ENSMUSG00000086480 | 6,73E-01  | -2,31116759  | 6,57E-01  | 4,18E-01 | 7,13E-01 | Gm15287       | 1,59 | No |
| ENSMUSG00000086484 | 2,84E-01  | -1,436734259 | 2,43E-01  | 6,22E-01 | 8,58E-01 | Nron          | 1,22 | No |
| ENSMUSG00000086485 | -8,15E-01 | -2,770569811 | 3,66E-01  | 5,45E-01 | 8,13E-01 | Gm15458       | 0,57 | No |
| ENSMUSG00000086486 | -2,35E-01 | -2,683176736 | 5,30E-02  | 8,18E-01 | 9,70E-01 | lft88os       | 0,85 | No |
| ENSMUSG00000086489 | 3,14E-02  | -3,107617333 | -7,69E-10 | 1,00E+00 | 1,00E+00 | Gm16362       | 1,02 | No |
| ENSMUSG00000086491 | -1,92E+00 | -3,033623267 | 1,46E+00  | 2,27E-01 | 5,50E-01 | Gm13291       | 0,26 | No |
| ENSMUSG00000086493 | 1,82E+00  | -3,033661385 | 1,31E+00  | 2,52E-01 | 5,50E-01 | Gm12204       | 3,54 | No |
| ENSMUSG00000086494 | -1,89E+00 | -2,77060848  | 1,43E+00  | 2,32E-01 | 5,50E-01 | 2210417A02Rik | 0,27 | No |
| ENSMUSG00000086495 | -5,43E-01 | -2,205723456 | 4,37E-01  | 5,08E-01 | 7,92E-01 | Gm13778       | 0,69 | No |
| ENSMUSG00000086496 | -2,68E+00 | -3,033645766 | 2,84E+00  | 9,17E-02 | 3,82E-01 | Gm14204       | 0,16 | No |

|                    |           |              |           |          |          |               |      |    |
|--------------------|-----------|--------------|-----------|----------|----------|---------------|------|----|
| ENSMUSG00000086498 | 9,01E-03  | -3,107646452 | -5,16E-10 | 1,00E+00 | 1,00E+00 | Gm12681       | 1,01 | No |
| ENSMUSG00000086499 | -1,81E-01 | -1,497511495 | 9,58E-02  | 7,57E-01 | 9,35E-01 | Gm16217       | 0,88 | No |
| ENSMUSG00000086500 | -2,49E-02 | -3,146121042 | -4,44E-11 | 1,00E+00 | 1,00E+00 | Gm15875       | 0,98 | No |
| ENSMUSG00000086501 | 1,85E+00  | -3,107657832 | 1,35E+00  | 2,46E-01 | 5,50E-01 | 4930597A21Rik | 3,61 | No |
| ENSMUSG00000086502 | 1,69E-02  | 1,20098038   | 7,61E-03  | 9,30E-01 | 1,00E+00 | B130055M24Rik | 1,01 | No |
| ENSMUSG00000086504 | 3,13E+00  | -2,832064034 | 4,00E+00  | 4,55E-02 | 2,54E-01 | Kif16bos      | 8,77 | No |
| ENSMUSG00000086506 | 1,86E-01  | 1,645917104  | 1,26E+00  | 2,61E-01 | 5,54E-01 | Gm15911       | 1,14 | No |
| ENSMUSG00000086507 | 2,56E-01  | 1,231517552  | 1,76E+00  | 1,85E-01 | 5,49E-01 | Adap2os       | 1,19 | No |
| ENSMUSG00000086513 | -8,05E-02 | 3,909881892  | 8,08E-01  | 3,69E-01 | 6,70E-01 | 9130208D14Rik | 0,95 | No |
| ENSMUSG00000086514 | -6,88E-01 | -3,033623656 | 1,90E-01  | 6,63E-01 | 8,83E-01 | Gm11747       | 0,62 | No |
| ENSMUSG00000086515 | 1,85E+00  | -3,107657832 | 1,35E+00  | 2,46E-01 | 5,50E-01 | Erich2os      | 3,61 | No |
| ENSMUSG00000086522 | -1,94E+00 | -3,107619243 | 1,50E+00  | 2,21E-01 | 5,50E-01 | Gm4473        | 0,26 | No |
| ENSMUSG00000086523 | 3,14E-02  | -3,107617333 | -7,69E-10 | 1,00E+00 | 1,00E+00 | Gm13499       | 1,02 | No |
| ENSMUSG00000086526 | -2,44E+00 | -2,497503246 | 5,13E+00  | 2,35E-02 | 1,68E-01 | Gm12762       | 0,18 | No |
| ENSMUSG00000086527 | -8,26E-01 | -1,098045749 | 3,40E+00  | 6,50E-02 | 3,19E-01 | Gm15856       | 0,56 | No |
| ENSMUSG00000086528 | 1,87E+00  | -3,107639691 | 1,38E+00  | 2,40E-01 | 5,50E-01 | Gm15731       | 3,67 | No |
| ENSMUSG00000086529 | 3,58E-01  | -0,989277838 | 7,23E-01  | 3,95E-01 | 6,96E-01 | Acss2os       | 1,28 | No |
| ENSMUSG00000086533 | -1,49E-02 | 1,802227201  | 9,00E-03  | 9,24E-01 | 1,00E+00 | Myposos       | 0,99 | No |
| ENSMUSG00000086536 | -2,70E-02 | 2,416191375  | 4,09E-02  | 8,40E-01 | 9,83E-01 | Gm12264       | 0,98 | No |
| ENSMUSG00000086537 | -1,09E+00 | -2,126776743 | 2,07E+00  | 1,50E-01 | 4,91E-01 | Nespas        | 0,47 | No |
| ENSMUSG00000086539 | 5,91E-02  | 0,784017484  | 7,04E-02  | 7,91E-01 | 9,55E-01 | Gm16759       | 1,04 | No |
| ENSMUSG00000086542 | 1,84E+00  | -3,033632273 | 1,33E+00  | 2,49E-01 | 5,50E-01 | Gm13782       | 3,58 | No |
| ENSMUSG00000086544 | -7,01E-01 | -2,655134464 | 4,69E-01  | 4,93E-01 | 7,79E-01 | Chn1os3       | 0,62 | No |
| ENSMUSG00000086546 | 1,10E+00  | -0,904518088 | 6,20E+00  | 1,28E-02 | 1,12E-01 | Gm13709       | 2,14 | No |
| ENSMUSG00000086547 | -3,56E+00 | -2,77055761  | 5,69E+00  | 1,70E-02 | 1,36E-01 | Gm11755       | 0,08 | No |
| ENSMUSG00000086548 | 1,24E+00  | -2,896144933 | 9,52E-01  | 3,29E-01 | 6,30E-01 | Gm12972       | 2,36 | No |
| ENSMUSG00000086549 | -5,80E-01 | -2,655144157 | 2,64E-01  | 6,08E-01 | 8,50E-01 | Gm13648       | 0,67 | No |
| ENSMUSG00000086554 | -6,95E-01 | -2,07009042  | 8,23E-01  | 3,64E-01 | 6,65E-01 | 9530034E10Rik | 0,62 | No |
| ENSMUSG00000086556 | -1,17E+00 | -2,896135966 | 5,98E-01  | 4,39E-01 | 7,32E-01 | Gm15444       | 0,44 | No |
| ENSMUSG00000086557 | -2,70E+00 | -3,033614577 | 2,89E+00  | 8,93E-02 | 3,79E-01 | Gm15999       | 0,15 | No |
| ENSMUSG00000086560 | 4,73E-01  | -2,548216562 | 2,39E-01  | 6,25E-01 | 8,59E-01 | Gm13372       | 1,39 | No |
| ENSMUSG00000086561 | 1,35E-02  | -0,755717482 | 1,18E-03  | 9,73E-01 | 1,00E+00 | Gm15540       | 1,01 | No |

|                    |           |              |           |          |          |               |      |     |
|--------------------|-----------|--------------|-----------|----------|----------|---------------|------|-----|
| ENSMUSG00000086563 | -3,83E-02 | -3,107651936 | -7,91E-11 | 1,00E+00 | 1,00E+00 | Platr15       | 0,97 | No  |
| ENSMUSG00000086564 | 3,61E-02  | 1,056036866  | 3,07E-02  | 8,61E-01 | 9,96E-01 | Cd101         | 1,03 | No  |
| ENSMUSG00000086567 | -3,19E-01 | -2,033655253 | 1,52E-01  | 6,97E-01 | 9,03E-01 | Gm2830        | 0,80 | No  |
| ENSMUSG00000086569 | -8,12E-01 | -2,896138345 | 3,61E-01  | 5,48E-01 | 8,15E-01 | Rab11fip4os2  | 0,57 | No  |
| ENSMUSG00000086575 | 1,74E-01  | -2,268190494 | 4,54E-02  | 8,31E-01 | 9,78E-01 | Gm14104       | 1,13 | No  |
| ENSMUSG00000086578 | -1,45E+00 | -2,963239499 | 9,77E-01  | 3,23E-01 | 6,23E-01 | Gm13583       | 0,37 | No  |
| ENSMUSG00000086582 | 1,75E-01  | 1,630007882  | 1,08E+00  | 2,99E-01 | 5,95E-01 | Gm16272       | 1,13 | No  |
| ENSMUSG00000086583 | -1,73E-01 | 9,214405096  | 9,27E+00  | 2,33E-03 | 3,17E-02 | Gm15500       | 0,89 | Yes |
| ENSMUSG00000086586 | -2,34E-02 | 1,154214286  | 1,38E-02  | 9,07E-01 | 1,00E+00 | Gm11192       | 0,98 | No  |
| ENSMUSG00000086589 | -3,81E-01 | -0,593878602 | 1,04E+00  | 3,09E-01 | 6,07E-01 | Gm12915       | 0,77 | No  |
| ENSMUSG00000086591 | -1,48E+00 | -2,998029843 | 1,02E+00  | 3,13E-01 | 6,13E-01 | Dnah2os       | 0,36 | No  |
| ENSMUSG00000086593 | -7,74E-02 | -1,344384728 | 2,24E-02  | 8,81E-01 | 1,00E+00 | Gm16548       | 0,95 | No  |
| ENSMUSG00000086594 | 1,51E-01  | -1,614070138 | 7,19E-02  | 7,89E-01 | 9,54E-01 | Nudt12os      | 1,11 | No  |
| ENSMUSG00000086595 | 1,21E+00  | -3,107652142 | 6,74E-01  | 4,12E-01 | 7,07E-01 | Gm12214       | 2,31 | No  |
| ENSMUSG00000086596 | 2,18E-01  | -2,401380721 | 5,98E-02  | 8,07E-01 | 9,64E-01 | Susd5         | 1,16 | No  |
| ENSMUSG00000086598 | -6,42E-02 | -1,033631888 | 1,64E-02  | 8,98E-01 | 1,00E+00 | Btbd18        | 0,96 | No  |
| ENSMUSG00000086600 | -3,02E-01 | 1,327711888  | 2,77E+00  | 9,58E-02 | 3,86E-01 | C030005K06Rik | 0,81 | No  |
| ENSMUSG00000086601 | 1,22E+00  | -3,146114919 | 6,90E-01  | 4,06E-01 | 7,02E-01 | Rapgef3os1    | 2,33 | No  |
| ENSMUSG00000086603 | 3,08E-01  | 0,277301718  | 1,27E+00  | 2,59E-01 | 5,52E-01 | Gm13620       | 1,24 | No  |
| ENSMUSG00000086604 | -6,97E-01 | -2,107578578 | 8,27E-01  | 3,63E-01 | 6,64E-01 | Gm15510       | 0,62 | No  |
| ENSMUSG00000086606 | 1,44E-02  | 0,369409135  | 3,13E-03  | 9,55E-01 | 1,00E+00 | Gm13205       | 1,01 | No  |
| ENSMUSG00000086607 | -1,36E+00 | -2,311156216 | 2,54E+00  | 1,11E-01 | 4,08E-01 | 4930511M06Rik | 0,39 | No  |
| ENSMUSG00000086610 | 1,33E-01  | -0,322270214 | 1,58E-01  | 6,91E-01 | 9,00E-01 | Gm15408       | 1,10 | No  |
| ENSMUSG00000086612 | -1,94E+00 | -3,107619243 | 1,50E+00  | 2,21E-01 | 5,50E-01 | Gm12064       | 0,26 | No  |
| ENSMUSG00000086618 | 3,76E-01  | -2,896142985 | 7,10E-02  | 7,90E-01 | 9,54E-01 | Gm13256       | 1,30 | No  |
| ENSMUSG00000086620 | 1,26E+00  | -2,832008138 | 9,84E-01  | 3,21E-01 | 6,22E-01 | Rspo4os       | 2,39 | No  |
| ENSMUSG00000086621 | 1,79E+00  | -3,033666867 | 1,28E+00  | 2,58E-01 | 5,50E-01 | Gm13348       | 3,46 | No  |
| ENSMUSG00000086624 | -7,80E-01 | -2,74084808  | 5,06E-01  | 4,77E-01 | 7,65E-01 | Gm16130       | 0,58 | No  |
| ENSMUSG00000086625 | -8,76E-02 | -1,847799071 | 2,34E-02  | 8,78E-01 | 1,00E+00 | Gm11831       | 0,94 | No  |
| ENSMUSG00000086628 | -7,16E-01 | -2,963271156 | 2,05E-01  | 6,51E-01 | 8,76E-01 | Gm16157       | 0,61 | No  |
| ENSMUSG00000086632 | 7,79E-01  | -2,070204797 | 9,07E-01  | 3,41E-01 | 6,42E-01 | 1700112J05Rik | 1,72 | No  |
| ENSMUSG00000086637 | 7,20E-01  | -1,998030145 | 9,26E-01  | 3,36E-01 | 6,37E-01 | Gm14040       | 1,65 | No  |

|                    |           |              |           |          |          |               |      |    |
|--------------------|-----------|--------------|-----------|----------|----------|---------------|------|----|
| ENSMUSG00000086638 | 3,28E-01  | -1,614096675 | 3,29E-01  | 5,66E-01 | 8,28E-01 | 4930405A21Rik | 1,26 | No |
| ENSMUSG00000086641 | -2,49E-02 | -3,146121042 | -4,44E-11 | 1,00E+00 | 1,00E+00 | Gm13663       | 0,98 | No |
| ENSMUSG00000086645 | -2,29E-02 | 2,025910369  | 2,35E-02  | 8,78E-01 | 1,00E+00 | Gm15743       | 0,98 | No |
| ENSMUSG00000086648 | 8,13E-01  | -1,535373657 | 1,84E+00  | 1,75E-01 | 5,33E-01 | Gm15511       | 1,76 | No |
| ENSMUSG00000086652 | 4,01E-01  | 0,07878568   | 2,00E+00  | 1,57E-01 | 5,02E-01 | Gm14029       | 1,32 | No |
| ENSMUSG00000086654 | 2,65E+00  | -3,033655087 | 2,73E+00  | 9,86E-02 | 3,91E-01 | Gm13165       | 6,30 | No |
| ENSMUSG00000086655 | -3,86E-02 | -2,896135204 | 7,14E-04  | 9,79E-01 | 1,00E+00 | C330018A13Rik | 0,97 | No |
| ENSMUSG00000086656 | 7,36E-02  | 1,75491675   | 2,07E-01  | 6,49E-01 | 8,75E-01 | Gm15701       | 1,05 | No |
| ENSMUSG00000086657 | 7,20E-01  | -0,816399882 | 3,14E+00  | 7,63E-02 | 3,52E-01 | Stamos        | 1,65 | No |
| ENSMUSG00000086658 | -8,86E-02 | -2,963249454 | 3,57E-03  | 9,52E-01 | 1,00E+00 | Gm14260       | 0,94 | No |
| ENSMUSG00000086665 | -8,33E-01 | -1,311028308 | 2,83E+00  | 9,24E-02 | 3,83E-01 | Gm13067       | 0,56 | No |
| ENSMUSG00000086669 | 1,87E+00  | -3,107639691 | 1,38E+00  | 2,40E-01 | 5,50E-01 | AA645442      | 3,67 | No |
| ENSMUSG00000086670 | -1,16E+00 | -2,497563886 | 1,73E+00  | 1,88E-01 | 5,50E-01 | Gm13194       | 0,45 | No |
| ENSMUSG00000086671 | 6,26E-01  | -2,448648355 | 4,37E-01  | 5,09E-01 | 7,92E-01 | Gm13618       | 1,54 | No |
| ENSMUSG00000086675 | 1,86E+00  | -3,033661846 | 1,35E+00  | 2,46E-01 | 5,50E-01 | Plxna4os2     | 3,62 | No |
| ENSMUSG00000086679 | -8,57E-01 | -2,770538754 | 4,02E-01  | 5,26E-01 | 8,03E-01 | Gm15551       | 0,55 | No |
| ENSMUSG00000086680 | -2,04E-01 | 0,641724503  | 7,77E-01  | 3,78E-01 | 6,79E-01 | Gm11592       | 0,87 | No |
| ENSMUSG00000086681 | -1,35E+00 | -2,355548666 | 2,50E+00  | 1,14E-01 | 4,17E-01 | Gm16178       | 0,39 | No |
| ENSMUSG00000086682 | 2,27E-01  | 0,752754449  | 9,46E-01  | 3,31E-01 | 6,31E-01 | Gm16023       | 1,17 | No |
| ENSMUSG00000086683 | -3,98E-02 | 1,601735801  | 5,34E-02  | 8,17E-01 | 9,70E-01 | Gm12867       | 0,97 | No |
| ENSMUSG00000086686 | -1,03E+00 | -1,863604869 | 2,38E+00  | 1,23E-01 | 4,39E-01 | F630206G17Rik | 0,49 | No |
| ENSMUSG00000086687 | 7,06E-01  | -2,896151228 | 2,71E-01  | 6,03E-01 | 8,48E-01 | 4930547E08Rik | 1,63 | No |
| ENSMUSG00000086688 | 8,80E-02  | 7,220998392  | 2,14E+00  | 1,43E-01 | 4,79E-01 | Gm11560       | 1,06 | No |
| ENSMUSG00000086689 | 3,89E-01  | -2,998000588 | 7,59E-02  | 7,83E-01 | 9,50E-01 | Gm16876       | 1,31 | No |
| ENSMUSG00000086690 | 8,49E-01  | -2,472927586 | 8,66E-01  | 3,52E-01 | 6,53E-01 | 4933406J10Rik | 1,80 | No |
| ENSMUSG00000086693 | 1,07E-01  | 3,602406817  | 1,18E+00  | 2,77E-01 | 5,74E-01 | A730081D07Rik | 1,08 | No |
| ENSMUSG00000086694 | -7,65E-02 | -2,311219976 | 8,10E-03  | 9,28E-01 | 1,00E+00 | Gm16237       | 0,95 | No |
| ENSMUSG00000086697 | -2,59E-01 | -0,460727251 | 5,50E-01  | 4,58E-01 | 7,47E-01 | 4933427G23Rik | 0,84 | No |
| ENSMUSG00000086699 | 3,14E-02  | -3,107617333 | -7,69E-10 | 1,00E+00 | 1,00E+00 | Gm16510       | 1,02 | No |
| ENSMUSG00000086700 | 4,77E-02  | 1,049766612  | 5,49E-02  | 8,15E-01 | 9,68E-01 | Gm15747       | 1,03 | No |
| ENSMUSG00000086701 | 2,32E-01  | -2,146153576 | 6,77E-02  | 7,95E-01 | 9,57E-01 | Gm13595       | 1,17 | No |
| ENSMUSG00000086703 | 3,14E-02  | -3,107617333 | -7,69E-10 | 1,00E+00 | 1,00E+00 | 4930507D10Rik | 1,02 | No |

|                    |           |              |          |          |          |               |  |      |     |
|--------------------|-----------|--------------|----------|----------|----------|---------------|--|------|-----|
| ENSMUSG00000086706 | -3,17E+00 | -2,896142751 | 4,24E+00 | 3,94E-02 | 2,35E-01 | Gm15848       |  | 0,11 | No  |
| ENSMUSG00000086707 | -1,87E+00 | -3,107637761 | 1,39E+00 | 2,38E-01 | 5,50E-01 | Gm12088       |  | 0,27 | No  |
| ENSMUSG00000086712 | 3,62E-01  | -0,34439767  | 1,13E+00 | 2,88E-01 | 5,84E-01 | AI427809      |  | 1,29 | No  |
| ENSMUSG00000086714 | 2,02E-01  | 3,872160307  | 4,91E+00 | 2,67E-02 | 1,83E-01 | 0610009E02Rik |  | 1,15 | No  |
| ENSMUSG00000086716 | -2,07E-01 | -1,896150261 | 1,05E-01 | 7,46E-01 | 9,29E-01 | Gm11629       |  | 0,87 | No  |
| ENSMUSG00000086717 | -1,15E-01 | -0,327671173 | 1,13E-01 | 7,37E-01 | 9,25E-01 | Gm15655       |  | 0,92 | No  |
| ENSMUSG00000086718 | -2,94E-02 | 2,976816971  | 6,64E-02 | 7,97E-01 | 9,58E-01 | Gm16069       |  | 0,98 | No  |
| ENSMUSG00000086719 | -2,35E+00 | -2,998024476 | 2,16E+00 | 1,42E-01 | 4,76E-01 | Gm16275       |  | 0,20 | No  |
| ENSMUSG00000086720 | 1,22E+00  | -3,146114919 | 6,90E-01 | 4,06E-01 | 7,02E-01 | Plxna4os3     |  | 2,33 | No  |
| ENSMUSG00000086721 | 3,97E-01  | -2,033653303 | 2,52E-01 | 6,16E-01 | 8,54E-01 | Gm13750       |  | 1,32 | No  |
| ENSMUSG00000086724 | 1,09E-02  | 0,470729159  | 1,96E-03 | 9,65E-01 | 1,00E+00 | Gm12833       |  | 1,01 | No  |
| ENSMUSG00000086725 | -2,16E-01 | 1,573753312  | 1,57E+00 | 2,11E-01 | 5,50E-01 | A630052C17Rik |  | 0,86 | No  |
| ENSMUSG00000086728 | -6,03E-02 | 2,253498114  | 1,90E-01 | 6,63E-01 | 8,83E-01 | Man2c1os      |  | 0,96 | No  |
| ENSMUSG00000086735 | 1,86E+00  | -2,711704019 | 1,35E+00 | 2,46E-01 | 5,50E-01 | Gm13977       |  | 3,63 | No  |
| ENSMUSG00000086740 | -1,86E-01 | 2,600723633  | 2,22E+00 | 1,36E-01 | 4,65E-01 | Gm17029       |  | 0,88 | No  |
| ENSMUSG00000086741 | -3,77E-02 | -2,800973078 | 7,15E-04 | 9,79E-01 | 1,00E+00 | Gm15816       |  | 0,97 | No  |
| ENSMUSG00000086742 | -2,83E-01 | 2,319015774  | 4,39E+00 | 3,61E-02 | 2,25E-01 | Gm16201       |  | 0,82 | No  |
| ENSMUSG00000086743 | -2,41E-01 | 1,203242016  | 1,63E+00 | 2,02E-01 | 5,50E-01 | Hnrnpa1l2-ps  |  | 0,85 | No  |
| ENSMUSG00000086745 | 1,62E+00  | -2,770628438 | 1,79E+00 | 1,80E-01 | 5,42E-01 | Tspan2os      |  | 3,07 | No  |
| ENSMUSG00000086746 | -1,89E+00 | -3,1076441   | 1,42E+00 | 2,33E-01 | 5,50E-01 | Gm15222       |  | 0,27 | No  |
| ENSMUSG00000086750 | -4,12E+00 | -2,655072747 | 8,64E+00 | 3,28E-03 | 4,11E-02 | Gm11770       |  | 0,06 | Yes |
| ENSMUSG00000086753 | -1,71E-01 | 3,018998503  | 2,47E+00 | 1,16E-01 | 4,22E-01 | Gm15751       |  | 0,89 | No  |
| ENSMUSG00000086754 | 1,44E-01  | -2,070155153 | 3,85E-02 | 8,44E-01 | 9,86E-01 | Gm16098       |  | 1,11 | No  |
| ENSMUSG00000086755 | 1,20E-01  | -2,070155732 | 2,82E-02 | 8,67E-01 | 9,99E-01 | Gm11216       |  | 1,09 | No  |
| ENSMUSG00000086756 | -1,33E+00 | -2,600596545 | 1,12E+00 | 2,91E-01 | 5,86E-01 | Gm14051       |  | 0,40 | No  |
| ENSMUSG00000086763 | -6,24E-01 | -0,289489087 | 3,59E+00 | 5,81E-02 | 2,97E-01 | Plxna4os1     |  | 0,65 | No  |
| ENSMUSG00000086765 | -4,70E-01 | -1,711654752 | 5,89E-01 | 4,43E-01 | 7,34E-01 | Gm11827       |  | 0,72 | No  |
| ENSMUSG00000086766 | -1,87E+00 | -3,03364178  | 1,41E+00 | 2,36E-01 | 5,50E-01 | Gm15969       |  | 0,27 | No  |
| ENSMUSG00000086767 | -8,81E-01 | -0,401052129 | 6,90E+00 | 8,60E-03 | 8,36E-02 | Gm13070       |  | 0,54 | No  |
| ENSMUSG00000086769 | 2,91E+00  | -2,896169785 | 3,36E+00 | 6,69E-02 | 3,26E-01 | Gm15587       |  | 7,52 | No  |
| ENSMUSG00000086773 | -2,72E-01 | -1,06108666  | 3,61E-01 | 5,48E-01 | 8,15E-01 | Gm16192       |  | 0,83 | No  |
| ENSMUSG00000086774 | 1,85E+00  | -3,107657832 | 1,35E+00 | 2,46E-01 | 5,50E-01 | Gm11915       |  | 3,61 | No  |



|                    |           |              |           |          |          |               |      |    |
|--------------------|-----------|--------------|-----------|----------|----------|---------------|------|----|
| ENSMUSG00000086775 | -2,01E-01 | 0,710551047  | 8,33E-01  | 3,61E-01 | 6,63E-01 | Snhg7os       | 0,87 | No |
| ENSMUSG00000086779 | 2,85E-01  | 2,523331613  | 4,93E+00  | 2,64E-02 | 1,82E-01 | Gm13562       | 1,22 | No |
| ENSMUSG00000086781 | -1,94E+00 | -3,107619243 | 1,50E+00  | 2,21E-01 | 5,50E-01 | 1700092C02Rik | 0,26 | No |
| ENSMUSG00000086782 | 3,27E-03  | -0,061140276 | 1,10E-04  | 9,92E-01 | 1,00E+00 | E130102H24Rik | 1,00 | No |
| ENSMUSG00000086784 | 1,34E-01  | 4,99693437   | 3,26E+00  | 7,10E-02 | 3,37E-01 | Isoc2a        | 1,10 | No |
| ENSMUSG00000086786 | -4,03E-01 | -1,333094789 | 5,96E-01  | 4,40E-01 | 7,32E-01 | Gm15908       | 0,76 | No |
| ENSMUSG00000086789 | -2,67E+00 | -2,896151435 | 2,84E+00  | 9,17E-02 | 3,82E-01 | Lyrn7os       | 0,16 | No |
| ENSMUSG00000086792 | 6,70E-01  | -1,40144055  | 1,88E+00  | 1,71E-01 | 5,26E-01 | Gm12364       | 1,59 | No |
| ENSMUSG00000086794 | 7,55E-01  | -2,896158401 | 3,11E-01  | 5,77E-01 | 8,35E-01 | Gm11642       | 1,69 | No |
| ENSMUSG00000086795 | 4,72E-01  | -2,770639385 | 1,75E-01  | 6,76E-01 | 8,91E-01 | Gm11579       | 1,39 | No |
| ENSMUSG00000086796 | -4,03E-01 | -2,424820076 | 1,85E-01  | 6,67E-01 | 8,86E-01 | 4932702P03Rik | 0,76 | No |
| ENSMUSG00000086798 | -2,70E+00 | -3,033614577 | 2,89E+00  | 8,93E-02 | 3,79E-01 | Gm16222       | 0,15 | No |
| ENSMUSG00000086799 | 1,38E+00  | -2,268130006 | 1,94E+00  | 1,64E-01 | 5,15E-01 | 4930502E09Rik | 2,60 | No |
| ENSMUSG00000086801 | 1,41E-01  | -0,126827064 | 2,15E-01  | 6,43E-01 | 8,72E-01 | Gm15943       | 1,10 | No |
| ENSMUSG00000086804 | 5,60E-01  | -2,355600633 | 5,31E-01  | 4,66E-01 | 7,55E-01 | Gm43154       | 1,47 | No |
| ENSMUSG00000086805 | -2,08E-02 | 0,587007502  | 6,94E-03  | 9,34E-01 | 1,00E+00 | 4932443L11Rik | 0,99 | No |
| ENSMUSG00000086806 | -1,53E-01 | -1,215982667 | 9,89E-02  | 7,53E-01 | 9,33E-01 | Gm13054       | 0,90 | No |
| ENSMUSG00000086808 | -1,35E+00 | -2,89615366  | 1,14E+00  | 2,85E-01 | 5,82E-01 | Gm11981       | 0,39 | No |
| ENSMUSG00000086813 | -2,02E-03 | 1,217979472  | 1,06E-04  | 9,92E-01 | 1,00E+00 | Gm13657       | 1,00 | No |
| ENSMUSG00000086816 | -4,81E-02 | 1,181691457  | 5,88E-02  | 8,08E-01 | 9,65E-01 | Gm16726       | 0,97 | No |
| ENSMUSG00000086818 | -3,83E-02 | -3,107651936 | -7,91E-11 | 1,00E+00 | 1,00E+00 | Ctrcos        | 0,97 | No |
| ENSMUSG00000086820 | -4,21E-01 | -0,344281981 | 1,56E+00  | 2,12E-01 | 5,50E-01 | Gm11465       | 0,75 | No |
| ENSMUSG00000086824 | -3,83E-02 | -3,107651936 | -7,91E-11 | 1,00E+00 | 1,00E+00 | 4930448D08Rik | 0,97 | No |
| ENSMUSG00000086825 | -1,45E+00 | -2,711644453 | 1,73E+00  | 1,88E-01 | 5,50E-01 | Gm15675       | 0,37 | No |
| ENSMUSG00000086826 | -1,27E-01 | 1,159976362  | 4,30E-01  | 5,12E-01 | 7,95E-01 | Gm11739       | 0,92 | No |
| ENSMUSG00000086827 | 1,12E+00  | -2,548288382 | 1,18E+00  | 2,77E-01 | 5,73E-01 | 4930461C15Rik | 2,17 | No |
| ENSMUSG00000086828 | 5,97E-03  | -3,1461183   | -3,40E-10 | 1,00E+00 | 1,00E+00 | Gm15579       | 1,00 | No |
| ENSMUSG00000086835 | -5,55E-01 | -2,126739857 | 5,83E-01  | 4,45E-01 | 7,36E-01 | Gm11775       | 0,68 | No |
| ENSMUSG00000086836 | -1,73E-01 | -0,860975092 | 1,59E-01  | 6,90E-01 | 8,99E-01 | Gm13748       | 0,89 | No |
| ENSMUSG00000086837 | -4,13E-01 | -0,697083216 | 1,03E+00  | 3,11E-01 | 6,10E-01 | Gm16618       | 0,75 | No |
| ENSMUSG00000086838 | 2,32E+00  | -3,070172976 | 2,05E+00  | 1,52E-01 | 4,94E-01 | Gm16212       | 4,98 | No |
| ENSMUSG00000086839 | 4,54E-02  | 2,443806364  | 1,20E-01  | 7,30E-01 | 9,21E-01 | Gm11973       | 1,03 | No |

|                    |           |              |          |          |          |               |      |     |
|--------------------|-----------|--------------|----------|----------|----------|---------------|------|-----|
| ENSMUSG00000086841 | -3,76E-01 | 4,162392354  | 1,92E+01 | 1,21E-05 | 3,97E-04 | 2410006H16Rik | 0,77 | Yes |
| ENSMUSG00000086842 | 8,61E-02  | 0,638763241  | 1,38E-01 | 7,10E-01 | 9,10E-01 | Gm15681       | 1,06 | No  |
| ENSMUSG00000086843 | 1,83E+00  | -2,998021864 | 1,32E+00 | 2,50E-01 | 5,50E-01 | E030013I19Rik | 3,55 | No  |
| ENSMUSG00000086844 | -1,40E+00 | -0,863420012 | 9,63E+00 | 1,91E-03 | 2,70E-02 | B230206H07Rik | 0,38 | Yes |
| ENSMUSG00000086846 | -3,16E-02 | -0,497739068 | 7,55E-03 | 9,31E-01 | 1,00E+00 | Gm13642       | 0,98 | No  |
| ENSMUSG00000086849 | -6,91E-02 | -2,185539861 | 8,86E-03 | 9,25E-01 | 1,00E+00 | Gm13840       | 0,95 | No  |
| ENSMUSG00000086851 | -7,39E-01 | -1,548066562 | 1,43E+00 | 2,32E-01 | 5,50E-01 | A430108G06Rik | 0,60 | No  |
| ENSMUSG00000086855 | -2,37E+00 | -2,205715398 | 7,71E+00 | 5,50E-03 | 5,99E-02 | Gm13844       | 0,19 | No  |
| ENSMUSG00000086859 | -3,22E-01 | 3,42020429   | 9,83E+00 | 1,71E-03 | 2,47E-02 | Snhg20        | 0,80 | Yes |
| ENSMUSG00000086862 | -9,17E-01 | 5,454743759  | 1,76E+02 | 4,51E-40 | 5,41E-37 | Gm13546       | 0,53 | Yes |
| ENSMUSG00000086863 | -2,74E+00 | -3,033596063 | 2,99E+00 | 8,38E-02 | 3,71E-01 | Gm15543       | 0,15 | No  |
| ENSMUSG00000086866 | -1,49E+00 | -2,863639096 | 1,04E+00 | 3,08E-01 | 6,06E-01 | 4930512H18Rik | 0,36 | No  |
| ENSMUSG00000086867 | 1,20E+00  | -3,146123991 | 6,74E-01 | 4,12E-01 | 7,07E-01 | Gm4577        | 2,30 | No  |
| ENSMUSG00000086872 | -1,89E+00 | -3,1076441   | 1,42E+00 | 2,33E-01 | 5,50E-01 | Gm14225       | 0,27 | No  |
| ENSMUSG00000086873 | 6,98E-01  | 0,305991763  | 6,59E+00 | 1,03E-02 | 9,52E-02 | Gm15672       | 1,62 | No  |
| ENSMUSG00000086879 | 1,81E+00  | -3,10765737  | 1,28E+00 | 2,58E-01 | 5,50E-01 | Gm14012       | 3,49 | No  |
| ENSMUSG00000086881 | -2,20E-02 | -3,107641896 | 1,16E-04 | 9,91E-01 | 1,00E+00 | Gm13594       | 0,98 | No  |
| ENSMUSG00000086882 | -2,11E-01 | 3,512006688  | 4,49E+00 | 3,40E-02 | 2,17E-01 | Gm13352       | 0,86 | No  |
| ENSMUSG00000086884 | -2,26E+00 | -2,548143577 | 4,17E+00 | 4,12E-02 | 2,41E-01 | Gm16225       | 0,21 | No  |
| ENSMUSG00000086889 | 3,35E-01  | -1,006872436 | 5,72E-01 | 4,50E-01 | 7,40E-01 | Phf2os1       | 1,26 | No  |
| ENSMUSG00000086890 | -3,81E-02 | 2,116398834  | 6,80E-02 | 7,94E-01 | 9,56E-01 | 1700021J08Rik | 0,97 | No  |
| ENSMUSG00000086891 | -5,25E-02 | -3,033661434 | 4,08E-11 | 1,00E+00 | 1,00E+00 | Gm15963       | 0,96 | No  |
| ENSMUSG00000086893 | 1,93E+00  | -1,770727996 | 8,06E+00 | 4,52E-03 | 5,18E-02 | Gm11365       | 3,82 | No  |
| ENSMUSG00000086894 | 7,77E-02  | 0,368883424  | 8,58E-02 | 7,70E-01 | 9,42E-01 | Gm15708       | 1,06 | No  |
| ENSMUSG00000086898 | -1,22E-01 | -0,37843697  | 1,36E-01 | 7,12E-01 | 9,11E-01 | Itpr3os       | 0,92 | No  |
| ENSMUSG00000086899 | -2,01E+00 | -2,600639873 | 3,06E+00 | 8,04E-02 | 3,64E-01 | 1600002D24Rik | 0,25 | No  |
| ENSMUSG00000086900 | -7,38E-02 | -3,033659033 | 2,66E-03 | 9,59E-01 | 1,00E+00 | Kcnab3os      | 0,95 | No  |
| ENSMUSG00000086902 | -1,94E+00 | -3,107619243 | 1,50E+00 | 2,21E-01 | 5,50E-01 | Gm11728       | 0,26 | No  |
| ENSMUSG00000086904 | -1,52E+00 | -2,600650142 | 2,39E+00 | 1,22E-01 | 4,36E-01 | Gm13404       | 0,35 | No  |
| ENSMUSG00000086914 | -1,51E-02 | 0,37241593   | 3,53E-03 | 9,53E-01 | 1,00E+00 | Gm16124       | 0,99 | No  |
| ENSMUSG00000086915 | 5,99E-02  | -0,442701983 | 2,97E-02 | 8,63E-01 | 9,97E-01 | Gm16365       | 1,04 | No  |
| ENSMUSG00000086916 | 4,81E-01  | -1,472920571 | 7,13E-01 | 3,98E-01 | 6,98E-01 | Gm15903       | 1,40 | No  |

|                    |           |              |           |          |          |               |      |     |
|--------------------|-----------|--------------|-----------|----------|----------|---------------|------|-----|
| ENSMUSG00000086917 | 2,65E+00  | -3,033655087 | 2,73E+00  | 9,86E-02 | 3,91E-01 | Gm11630       | 6,30 | No  |
| ENSMUSG00000086918 | 1,59E+00  | -2,401376088 | 2,77E+00  | 9,61E-02 | 3,87E-01 | 4930429F24Rik | 3,02 | No  |
| ENSMUSG00000086920 | 1,77E-01  | -0,946168255 | 1,67E-01  | 6,83E-01 | 8,95E-01 | Gm12207       | 1,13 | No  |
| ENSMUSG00000086922 | -5,22E-02 | 6,746969532  | 7,16E-01  | 3,98E-01 | 6,98E-01 | Gm13835       | 0,96 | No  |
| ENSMUSG00000086923 | 2,65E+00  | -3,033655087 | 2,73E+00  | 9,86E-02 | 3,91E-01 | 4930406D18Rik | 6,30 | No  |
| ENSMUSG00000086924 | 1,12E+00  | -2,378226815 | 1,18E+00  | 2,77E-01 | 5,73E-01 | Gm11766       | 2,17 | No  |
| ENSMUSG00000086925 | -2,61E-01 | 4,083168234  | 8,94E+00  | 2,79E-03 | 3,62E-02 | Gm6286        | 0,83 | Yes |
| ENSMUSG00000086926 | -5,10E-01 | 1,678351166  | 8,97E+00  | 2,75E-03 | 3,58E-02 | Gm6226        | 0,70 | Yes |
| ENSMUSG00000086928 | -3,83E-02 | -3,107651936 | -7,91E-11 | 1,00E+00 | 1,00E+00 | Gm14210       | 0,97 | No  |
| ENSMUSG00000086929 | -2,85E-01 | 1,372345559  | 2,37E+00  | 1,24E-01 | 4,40E-01 | Gm11788       | 0,82 | No  |
| ENSMUSG00000086930 | -3,27E-01 | -1,879722511 | 2,17E-01  | 6,41E-01 | 8,71E-01 | Frs3os        | 0,80 | No  |
| ENSMUSG00000086931 | -2,69E+00 | -2,963229855 | 2,87E+00  | 9,01E-02 | 3,80E-01 | Gm14532       | 0,16 | No  |
| ENSMUSG00000086932 | 2,61E+00  | -3,033672762 | 2,63E+00  | 1,05E-01 | 3,97E-01 | Gm22000       | 6,10 | No  |
| ENSMUSG00000086933 | 8,57E-01  | -2,311267675 | 1,13E+00  | 2,88E-01 | 5,84E-01 | 4933426K07Rik | 1,81 | No  |
| ENSMUSG00000086935 | 2,45E-01  | 0,432247699  | 9,67E-01  | 3,25E-01 | 6,26E-01 | Gm15956       | 1,18 | No  |
| ENSMUSG00000086938 | 1,19E-01  | 1,774783829  | 5,34E-01  | 4,65E-01 | 7,54E-01 | 4930481A15Rik | 1,09 | No  |
| ENSMUSG00000086942 | -6,72E-01 | -0,355329984 | 3,93E+00  | 4,74E-02 | 2,61E-01 | Gm15489       | 0,63 | No  |
| ENSMUSG00000086944 | -9,90E-01 | -2,311214304 | 1,51E+00  | 2,19E-01 | 5,50E-01 | Gm15859       | 0,50 | No  |
| ENSMUSG00000086946 | 2,80E-03  | -1,697415265 | 2,26E-05  | 9,96E-01 | 1,00E+00 | Gm15527       | 1,00 | No  |
| ENSMUSG00000086947 | -3,83E-02 | -3,107651936 | -7,91E-11 | 1,00E+00 | 1,00E+00 | 4930522O17Rik | 0,97 | No  |
| ENSMUSG00000086949 | 5,07E-02  | 1,4613672    | 8,09E-02  | 7,76E-01 | 9,46E-01 | Gm13066       | 1,04 | No  |
| ENSMUSG00000086952 | -1,99E+00 | -2,655089761 | 3,00E+00  | 8,33E-02 | 3,71E-01 | Gm12596       | 0,25 | No  |
| ENSMUSG00000086953 | -1,48E-01 | 0,34131932   | 3,37E-01  | 5,62E-01 | 8,25E-01 | Aknaos        | 0,90 | No  |
| ENSMUSG00000086961 | 3,67E-01  | -1,963353185 | 2,71E-01  | 6,03E-01 | 8,48E-01 | Gm12946       | 1,29 | No  |
| ENSMUSG00000086962 | 1,40E-01  | -0,472839082 | 1,28E-01  | 7,20E-01 | 9,15E-01 | Gm12248       | 1,10 | No  |
| ENSMUSG00000086965 | 8,78E-01  | -0,252718851 | 6,66E+00  | 9,85E-03 | 9,22E-02 | Rtl10         | 1,84 | No  |
| ENSMUSG00000086968 | -2,99E-01 | -0,146000349 | 9,21E-01  | 3,37E-01 | 6,38E-01 | 4933431E20Rik | 0,81 | No  |
| ENSMUSG00000086969 | -1,87E+00 | -3,107637761 | 1,39E+00  | 2,38E-01 | 5,50E-01 | 4930443O20Rik | 0,27 | No  |
| ENSMUSG00000086970 | -4,11E-02 | -3,07017516  | 6,23E-04  | 9,80E-01 | 1,00E+00 | Bcas1os1      | 0,97 | No  |
| ENSMUSG00000086976 | -1,22E-01 | 3,935843151  | 1,85E+00  | 1,74E-01 | 5,32E-01 | Gm12316       | 0,92 | No  |
| ENSMUSG00000086984 | 1,14E-01  | -1,929289297 | 2,56E-02  | 8,73E-01 | 1,00E+00 | Gm6762        | 1,08 | No  |
| ENSMUSG00000086986 | -8,62E-01 | -2,89616149  | 4,08E-01  | 5,23E-01 | 8,01E-01 | Gm12103       | 0,55 | No  |

|                    |           |              |          |          |          |               |      |     |
|--------------------|-----------|--------------|----------|----------|----------|---------------|------|-----|
| ENSMUSG00000086987 | -1,89E+00 | -3,1076441   | 1,42E+00 | 2,33E-01 | 5,50E-01 | Gm12484       | 0,27 | No  |
| ENSMUSG00000086991 | 5,97E-01  | -1,740849077 | 9,28E-01 | 3,35E-01 | 6,36E-01 | Gm15334       | 1,51 | No  |
| ENSMUSG00000086993 | 4,36E-02  | 2,139159243  | 8,96E-02 | 7,65E-01 | 9,39E-01 | Rsf1os2       | 1,03 | No  |
| ENSMUSG00000086994 | -2,40E-01 | 0,171931838  | 7,04E-01 | 4,01E-01 | 6,99E-01 | Gm13402       | 0,85 | No  |
| ENSMUSG00000086995 | 6,04E-01  | -3,070180849 | 1,46E-01 | 7,03E-01 | 9,06E-01 | Gm13544       | 1,52 | No  |
| ENSMUSG00000086997 | -4,29E-01 | 0,419552205  | 2,93E+00 | 8,67E-02 | 3,78E-01 | Gm12981       | 0,74 | No  |
| ENSMUSG00000086998 | -2,64E-01 | 2,305538627  | 3,81E+00 | 5,10E-02 | 2,75E-01 | Gm16033       | 0,83 | No  |
| ENSMUSG00000086999 | -3,74E+00 | -2,711643815 | 6,50E+00 | 1,08E-02 | 9,89E-02 | Bcas1os2      | 0,07 | No  |
| ENSMUSG00000087001 | -2,23E-02 | -3,070175391 | 1,85E-04 | 9,89E-01 | 1,00E+00 | Gm15475       | 0,98 | No  |
| ENSMUSG00000087002 | 6,54E-01  | -2,226345022 | 5,49E-01 | 4,59E-01 | 7,48E-01 | Gm16277       | 1,57 | No  |
| ENSMUSG00000087004 | -6,51E-01 | -1,136534211 | 1,80E+00 | 1,80E-01 | 5,41E-01 | Gm14154       | 0,64 | No  |
| ENSMUSG00000087006 | -4,67E-01 | -0,401153286 | 1,77E+00 | 1,83E-01 | 5,46E-01 | Gm13889       | 0,72 | No  |
| ENSMUSG00000087008 | -2,92E-01 | 3,590882129  | 9,06E+00 | 2,61E-03 | 3,45E-02 | Gm5530        | 0,82 | Yes |
| ENSMUSG00000087009 | 6,32E-01  | -3,07017201  | 1,62E-01 | 6,87E-01 | 8,98E-01 | Nphs1os       | 1,55 | No  |
| ENSMUSG00000087013 | 1,40E-01  | -0,200729862 | 1,92E-01 | 6,61E-01 | 8,82E-01 | 2610027K06Rik | 1,10 | No  |
| ENSMUSG00000087014 | 5,23E-01  | 0,151985629  | 3,76E+00 | 5,24E-02 | 2,79E-01 | Gm16364       | 1,44 | No  |
| ENSMUSG00000087016 | -5,03E-01 | -1,740854996 | 6,13E-01 | 4,34E-01 | 7,27E-01 | Gm15979       | 0,71 | No  |
| ENSMUSG00000087017 | -1,50E-01 | 1,808430299  | 8,57E-01 | 3,54E-01 | 6,56E-01 | 4930417H01Rik | 0,90 | No  |
| ENSMUSG00000087020 | -6,58E-02 | -2,448689826 | 4,97E-03 | 9,44E-01 | 1,00E+00 | Gm16283       | 0,96 | No  |
| ENSMUSG00000087022 | 5,38E-01  | -0,816429951 | 1,49E+00 | 2,22E-01 | 5,50E-01 | 9130024F11Rik | 1,45 | No  |
| ENSMUSG00000087026 | 1,22E-01  | 2,465539701  | 8,72E-01 | 3,50E-01 | 6,52E-01 | A230103J11Rik | 1,09 | No  |
| ENSMUSG00000087028 | -9,77E-01 | -0,946029954 | 6,07E+00 | 1,38E-02 | 1,18E-01 | Gm13387       | 0,51 | No  |
| ENSMUSG00000087030 | -7,07E-01 | -3,070177153 | 2,02E-01 | 6,53E-01 | 8,78E-01 | Gm16143       | 0,61 | No  |
| ENSMUSG00000087032 | -8,24E-01 | -2,770593047 | 3,73E-01 | 5,41E-01 | 8,11E-01 | Gm13874       | 0,57 | No  |
| ENSMUSG00000087034 | -8,92E-02 | 1,56901936   | 2,70E-01 | 6,03E-01 | 8,48E-01 | Cbfa2t2-ps1   | 0,94 | No  |
| ENSMUSG00000087036 | 4,33E-01  | -0,683227631 | 1,32E+00 | 2,50E-01 | 5,50E-01 | Gm11748       | 1,35 | No  |
| ENSMUSG00000087037 | -4,13E-02 | -3,033659495 | 7,08E-04 | 9,79E-01 | 1,00E+00 | 4930432L08Rik | 0,97 | No  |
| ENSMUSG00000087041 | -3,39E-01 | -1,051742822 | 6,01E-01 | 4,38E-01 | 7,31E-01 | Gm16295       | 0,79 | No  |
| ENSMUSG00000087042 | -2,66E+00 | -3,033639428 | 2,81E+00 | 9,35E-02 | 3,83E-01 | Gm11611       | 0,16 | No  |
| ENSMUSG00000087047 | 1,63E-01  | 0,65465177   | 4,44E-01 | 5,05E-01 | 7,90E-01 | 1700110K17Rik | 1,12 | No  |
| ENSMUSG00000087049 | 7,13E-01  | -2,832025483 | 2,77E-01 | 5,99E-01 | 8,46E-01 | Bach2it1      | 1,64 | No  |
| ENSMUSG00000087050 | -2,74E-02 | 1,676546713  | 2,74E-02 | 8,69E-01 | 1,00E+00 | Dhrs13os      | 0,98 | No  |

|                    |           |              |           |          |          |               |      |    |
|--------------------|-----------|--------------|-----------|----------|----------|---------------|------|----|
| ENSMUSG00000087052 | -3,14E-01 | 0,164171939  | 1,37E+00  | 2,41E-01 | 5,50E-01 | Gm8093        | 0,80 | No |
| ENSMUSG00000087055 | 4,27E-01  | -0,683066654 | 1,21E+00  | 2,72E-01 | 5,68E-01 | Gm11948       | 1,34 | No |
| ENSMUSG00000087056 | -1,87E+00 | -2,896124688 | 1,41E+00  | 2,34E-01 | 5,50E-01 | Gm14004       | 0,27 | No |
| ENSMUSG00000087057 | 6,28E-01  | -2,655118896 | 4,42E-01  | 5,06E-01 | 7,91E-01 | Gm11730       | 1,55 | No |
| ENSMUSG00000087060 | 2,85E-01  | 0,644315656  | 1,49E+00  | 2,22E-01 | 5,50E-01 | Eldr          | 1,22 | No |
| ENSMUSG00000087063 | -1,27E+00 | -3,070178353 | 7,36E-01  | 3,91E-01 | 6,91E-01 | Gm15857       | 0,42 | No |
| ENSMUSG00000087064 | -2,47E-02 | -0,466644779 | 4,42E-03  | 9,47E-01 | 1,00E+00 | Sap30bpos     | 0,98 | No |
| ENSMUSG00000087066 | -5,01E-01 | 0,191515037  | 3,33E+00  | 6,80E-02 | 3,28E-01 | Gm15518       | 0,71 | No |
| ENSMUSG00000087067 | -6,42E-01 | -2,333204796 | 6,30E-01  | 4,27E-01 | 7,21E-01 | Gm11532       | 0,64 | No |
| ENSMUSG00000087070 | -9,46E-01 | -2,448670434 | 1,08E+00  | 2,99E-01 | 5,95E-01 | Gm12505       | 0,52 | No |
| ENSMUSG00000087072 | -5,53E-01 | -2,600703013 | 2,40E-01  | 6,24E-01 | 8,59E-01 | Recql5os1     | 0,68 | No |
| ENSMUSG00000087075 | -2,71E+00 | -3,033620915 | 2,92E+00  | 8,75E-02 | 3,78E-01 | A230065H16Rik | 0,15 | No |
| ENSMUSG00000087076 | -2,66E+00 | -3,033639428 | 2,81E+00  | 9,35E-02 | 3,83E-01 | Gm13229       | 0,16 | No |
| ENSMUSG00000087077 | 2,67E+00  | -3,033636951 | 2,76E+00  | 9,68E-02 | 3,88E-01 | Gm12480       | 6,36 | No |
| ENSMUSG00000087082 | 6,73E-01  | -1,963269089 | 1,07E+00  | 3,01E-01 | 5,97E-01 | Gm15423       | 1,59 | No |
| ENSMUSG00000087086 | 2,06E-02  | -3,146103739 | -9,26E-10 | 1,00E+00 | 1,00E+00 | Gm13269       | 1,01 | No |
| ENSMUSG00000087088 | 4,61E-01  | -0,226560803 | 2,24E+00  | 1,34E-01 | 4,61E-01 | Gm16638       | 1,38 | No |
| ENSMUSG00000087089 | -6,56E-02 | -2,896173716 | 2,94E-03  | 9,57E-01 | 1,00E+00 | Gm12160       | 0,96 | No |
| ENSMUSG00000087090 | 2,60E+00  | -2,963258458 | 2,63E+00  | 1,05E-01 | 3,97E-01 | Nctc1         | 6,08 | No |
| ENSMUSG00000087093 | 1,88E+00  | -2,963218902 | 1,37E+00  | 2,42E-01 | 5,50E-01 | Gm15486       | 3,68 | No |
| ENSMUSG00000087094 | -7,67E-02 | -2,600708214 | 6,79E-03  | 9,34E-01 | 1,00E+00 | Gm13093       | 0,95 | No |
| ENSMUSG00000087097 | 3,50E-02  | -0,479106668 | 1,00E-02  | 9,20E-01 | 1,00E+00 | 4930586N03Rik | 1,02 | No |
| ENSMUSG00000087103 | 1,03E+00  | -2,832013696 | 6,16E-01  | 4,33E-01 | 7,26E-01 | Gm13344       | 2,04 | No |
| ENSMUSG00000087106 | 1,78E+00  | -2,896183485 | 1,28E+00  | 2,58E-01 | 5,50E-01 | Gm13964       | 3,43 | No |
| ENSMUSG00000087107 | 7,32E-02  | 6,014438958  | 1,26E+00  | 2,63E-01 | 5,57E-01 | AI662270      | 1,05 | No |
| ENSMUSG00000087108 | -9,81E-02 | 0,099593451  | 1,22E-01  | 7,27E-01 | 9,19E-01 | Gm16093       | 0,93 | No |
| ENSMUSG00000087109 | -5,04E-01 | -2,401295402 | 3,33E-01  | 5,64E-01 | 8,26E-01 | 4930474H06Rik | 0,71 | No |
| ENSMUSG00000087111 | 4,56E-01  | -1,19580897  | 1,01E+00  | 3,14E-01 | 6,14E-01 | Gm11399       | 1,37 | No |
| ENSMUSG00000087112 | 7,49E-01  | -2,185679608 | 7,46E-01  | 3,88E-01 | 6,88E-01 | Gm7237        | 1,68 | No |
| ENSMUSG00000087113 | -1,93E+00 | -2,963274349 | 1,47E+00  | 2,25E-01 | 5,50E-01 | Gm11714       | 0,26 | No |
| ENSMUSG00000087114 | -3,83E-02 | -3,107651936 | -7,91E-11 | 1,00E+00 | 1,00E+00 | Gm16099       | 0,97 | No |
| ENSMUSG00000087115 | 9,01E-03  | -3,107646452 | -5,16E-10 | 1,00E+00 | 1,00E+00 | Pcsk2os2      | 1,01 | No |

|                    |           |              |           |          |          |               |      |    |
|--------------------|-----------|--------------|-----------|----------|----------|---------------|------|----|
| ENSMUSG00000087117 | 3,14E-02  | -3,107617333 | -7,69E-10 | 1,00E+00 | 1,00E+00 | Gm11523       | 1,02 | No |
| ENSMUSG00000087119 | 5,40E-02  | 3,536299299  | 3,04E-01  | 5,81E-01 | 8,37E-01 | Atg4a-ps      | 1,04 | No |
| ENSMUSG00000087120 | 3,47E-01  | -0,971866113 | 6,32E-01  | 4,26E-01 | 7,21E-01 | Gm12279       | 1,27 | No |
| ENSMUSG00000087121 | 7,31E-01  | -2,963267542 | 2,91E-01  | 5,90E-01 | 8,41E-01 | Gm7847        | 1,66 | No |
| ENSMUSG00000087122 | -9,36E-01 | -2,448657305 | 7,68E-01  | 3,81E-01 | 6,82E-01 | 4930403D09Rik | 0,52 | No |
| ENSMUSG00000087125 | 6,31E-01  | -3,033642946 | 1,59E-01  | 6,90E-01 | 8,99E-01 | A230108P19Rik | 1,55 | No |
| ENSMUSG00000087128 | 1,71E-01  | 0,438874788  | 4,50E-01  | 5,02E-01 | 7,87E-01 | Gm12655       | 1,13 | No |
| ENSMUSG00000087129 | -2,05E+00 | -2,268099991 | 5,17E+00  | 2,29E-02 | 1,65E-01 | Gm16316       | 0,24 | No |
| ENSMUSG00000087131 | -1,35E+00 | -2,548239012 | 1,15E+00  | 2,84E-01 | 5,81E-01 | Gm16152       | 0,39 | No |
| ENSMUSG00000087132 | 4,18E-02  | -1,117171595 | 8,27E-03  | 9,28E-01 | 1,00E+00 | A930001C03Rik | 1,03 | No |
| ENSMUSG00000087135 | -4,00E-02 | 2,100078018  | 7,49E-02  | 7,84E-01 | 9,51E-01 | Gm16096       | 0,97 | No |
| ENSMUSG00000087137 | -1,87E+00 | -3,107637761 | 1,39E+00  | 2,38E-01 | 5,50E-01 | 4930509K18Rik | 0,27 | No |
| ENSMUSG00000087138 | 1,05E-01  | 1,610323174  | 3,82E-01  | 5,37E-01 | 8,08E-01 | Gm15545       | 1,08 | No |
| ENSMUSG00000087139 | 1,17E+00  | -3,14612376  | 6,40E-01  | 4,24E-01 | 7,18E-01 | Gm11683       | 2,26 | No |
| ENSMUSG00000087141 | -2,23E-01 | 3,69180271   | 5,75E+00  | 1,65E-02 | 1,34E-01 | Plxcd2        | 0,86 | No |
| ENSMUSG00000087142 | 1,00E-01  | 0,382686392  | 1,48E-01  | 7,00E-01 | 9,05E-01 | Gm12454       | 1,07 | No |
| ENSMUSG00000087148 | -1,87E+00 | -3,107637761 | 1,39E+00  | 2,38E-01 | 5,50E-01 | 1700030C14Rik | 0,27 | No |
| ENSMUSG00000087150 | -5,56E-02 | 2,047509141  | 1,41E-01  | 7,07E-01 | 9,08E-01 | BC064078      | 0,96 | No |
| ENSMUSG00000087153 | -1,12E-01 | 1,686389985  | 4,54E-01  | 5,00E-01 | 7,86E-01 | Gm6483        | 0,93 | No |
| ENSMUSG00000087163 | -4,76E-01 | -2,051752206 | 4,17E-01  | 5,19E-01 | 7,98E-01 | Gm16230       | 0,72 | No |
| ENSMUSG00000087164 | -1,94E+00 | -3,107619243 | 1,50E+00  | 2,21E-01 | 5,50E-01 | Nr5a1os       | 0,26 | No |
| ENSMUSG00000087165 | -2,98E-01 | 0,470949645  | 1,42E+00  | 2,33E-01 | 5,50E-01 | 2010001A14Rik | 0,81 | No |
| ENSMUSG00000087168 | 1,66E-01  | 0,083200965  | 3,31E-01  | 5,65E-01 | 8,28E-01 | Gm15983       | 1,12 | No |
| ENSMUSG00000087170 | -1,75E-02 | -2,963227524 | 1,42E-04  | 9,90E-01 | 1,00E+00 | 1700001G01Rik | 0,99 | No |
| ENSMUSG00000087175 | 3,02E-02  | -0,024462882 | 1,02E-02  | 9,19E-01 | 1,00E+00 | Gm15133       | 1,02 | No |
| ENSMUSG00000087176 | 1,89E+00  | -2,96320077  | 1,38E+00  | 2,40E-01 | 5,50E-01 | D230022J07Rik | 3,71 | No |
| ENSMUSG00000087177 | -7,65E-02 | 2,436406999  | 3,46E-01  | 5,56E-01 | 8,21E-01 | E130307A14Rik | 0,95 | No |
| ENSMUSG00000087178 | 7,35E-02  | 2,558981625  | 3,19E-01  | 5,72E-01 | 8,32E-01 | A230056P14Rik | 1,05 | No |
| ENSMUSG00000087179 | -6,12E-01 | -1,278746232 | 2,00E+00  | 1,57E-01 | 5,03E-01 | Gm14230       | 0,65 | No |
| ENSMUSG00000087181 | 4,22E-01  | -2,401420391 | 2,86E-01  | 5,93E-01 | 8,42E-01 | Gm13570       | 1,34 | No |
| ENSMUSG00000087185 | -2,66E+00 | -2,740791931 | 4,47E+00  | 3,45E-02 | 2,19E-01 | Gm13872       | 0,16 | No |
| ENSMUSG00000087187 | -3,29E-01 | 0,323812893  | 1,69E+00  | 1,93E-01 | 5,50E-01 | Gm13431       | 0,80 | No |

|                    |           |              |           |          |          |               |      |    |
|--------------------|-----------|--------------|-----------|----------|----------|---------------|------|----|
| ENSMUSG00000087190 | -6,36E-01 | -2,051754877 | 7,86E-01  | 3,75E-01 | 6,76E-01 | D430001F17Rik | 0,64 | No |
| ENSMUSG00000087192 | -6,47E-01 | -2,185665737 | 8,14E-01  | 3,67E-01 | 6,68E-01 | 4930412L05Rik | 0,64 | No |
| ENSMUSG00000087196 | -5,57E-01 | -1,963245397 | 6,78E-01  | 4,10E-01 | 7,07E-01 | Gm13373       | 0,68 | No |
| ENSMUSG00000087198 | -7,90E-01 | -2,378325195 | 8,05E-01  | 3,70E-01 | 6,71E-01 | Gm13097       | 0,58 | No |
| ENSMUSG00000087199 | -3,83E-02 | -3,107651936 | -7,91E-11 | 1,00E+00 | 1,00E+00 | Gm15818       | 0,97 | No |
| ENSMUSG00000087200 | -5,12E-01 | -2,268086812 | 4,19E-01  | 5,17E-01 | 7,98E-01 | Lrp8os3       | 0,70 | No |
| ENSMUSG00000087202 | 3,14E-02  | -3,107617333 | -7,69E-10 | 1,00E+00 | 1,00E+00 | Gm15813       | 1,02 | No |
| ENSMUSG00000087203 | -8,25E-01 | -1,247027986 | 3,08E+00  | 7,91E-02 | 3,60E-01 | Gm13986       | 0,56 | No |
| ENSMUSG00000087204 | -1,89E+00 | -3,1076441   | 1,42E+00  | 2,33E-01 | 5,50E-01 | 1700073E17Rik | 0,27 | No |
| ENSMUSG00000087206 | -4,83E-02 | -0,5611494   | 1,99E-02  | 8,88E-01 | 1,00E+00 | Gm16175       | 0,97 | No |
| ENSMUSG00000087207 | 1,34E-01  | -0,407223199 | 1,49E-01  | 6,99E-01 | 9,04E-01 | Gm13147       | 1,10 | No |
| ENSMUSG00000087213 | 2,13E-01  | 1,410951219  | 1,38E+00  | 2,40E-01 | 5,50E-01 | 2810408I11Rik | 1,16 | No |
| ENSMUSG00000087217 | -8,22E-01 | -2,832000781 | 3,71E-01  | 5,43E-01 | 8,12E-01 | Gm13209       | 0,57 | No |
| ENSMUSG00000087221 | 5,10E-02  | 2,782944083  | 1,77E-01  | 6,74E-01 | 8,90E-01 | BC037032      | 1,04 | No |
| ENSMUSG00000087222 | -3,09E-01 | -0,107400228 | 8,77E-01  | 3,49E-01 | 6,50E-01 | E030042O20Rik | 0,81 | No |
| ENSMUSG00000087223 | -1,87E+00 | -3,107637761 | 1,39E+00  | 2,38E-01 | 5,50E-01 | 4930442L01Rik | 0,27 | No |
| ENSMUSG00000087231 | -3,35E-01 | 2,568226255  | 6,94E+00  | 8,42E-03 | 8,23E-02 | E230016M11Rik | 0,79 | No |
| ENSMUSG00000087233 | 3,17E-02  | 1,979915065  | 4,36E-02  | 8,35E-01 | 9,80E-01 | Gm43213       | 1,02 | No |
| ENSMUSG00000087236 | -1,52E-01 | -0,86364126  | 1,31E-01  | 7,17E-01 | 9,14E-01 | Kif28         | 0,90 | No |
| ENSMUSG00000087239 | -1,33E+00 | -2,71164223  | 1,11E+00  | 2,93E-01 | 5,88E-01 | Gm7613        | 0,40 | No |
| ENSMUSG00000087240 | 2,34E-01  | -2,015746719 | 1,20E-01  | 7,29E-01 | 9,20E-01 | Gm15976       | 1,18 | No |
| ENSMUSG00000087242 | -2,18E-01 | -1,800973018 | 1,16E-01  | 7,33E-01 | 9,23E-01 | C78197        | 0,86 | No |
| ENSMUSG00000087248 | 1,12E+00  | -2,548257173 | 1,19E+00  | 2,74E-01 | 5,71E-01 | Gm16120       | 2,17 | No |
| ENSMUSG00000087249 | 3,27E-02  | 2,017179978  | 4,68E-02  | 8,29E-01 | 9,76E-01 | Gm16062       | 1,02 | No |
| ENSMUSG00000087250 | 8,34E-01  | -0,355681366 | 5,66E+00  | 1,74E-02 | 1,38E-01 | Usp46os1      | 1,78 | No |
| ENSMUSG00000087253 | -2,27E-01 | 0,664174235  | 9,08E-01  | 3,41E-01 | 6,41E-01 | Gm12043       | 0,85 | No |
| ENSMUSG00000087254 | 2,06E-02  | -3,146103739 | -9,26E-10 | 1,00E+00 | 1,00E+00 | 2310005A03Rik | 1,01 | No |
| ENSMUSG00000087256 | 8,80E-01  | -2,185723245 | 1,45E+00  | 2,28E-01 | 5,50E-01 | Gm15990       | 1,84 | No |
| ENSMUSG00000087258 | 1,39E+00  | -2,863734294 | 8,89E-01  | 3,46E-01 | 6,47E-01 | Gm15461       | 2,62 | No |
| ENSMUSG00000087259 | 1,44E-01  | 1,253653049  | 6,01E-01  | 4,38E-01 | 7,31E-01 | 2610035D17Rik | 1,11 | No |
| ENSMUSG00000087260 | -6,74E-02 | 5,073553032  | 8,51E-01  | 3,56E-01 | 6,58E-01 | Lamtor5       | 0,95 | No |
| ENSMUSG00000087261 | 1,07E-01  | -0,413100077 | 9,91E-02  | 7,53E-01 | 9,33E-01 | Gm15477       | 1,08 | No |

|                    |           |              |          |          |          |               |      |     |
|--------------------|-----------|--------------|----------|----------|----------|---------------|------|-----|
| ENSMUSG00000087266 | -9,81E-01 | -0,945946469 | 4,61E+00 | 3,19E-02 | 2,07E-01 | Gm15991       | 0,51 | No  |
| ENSMUSG00000087269 | -1,03E-01 | 0,070553419  | 1,16E-01 | 7,33E-01 | 9,23E-01 | D330023K18Rik | 0,93 | No  |
| ENSMUSG00000087270 | 1,87E+00  | -3,107639691 | 1,38E+00 | 2,40E-01 | 5,50E-01 | Gm12983       | 3,67 | No  |
| ENSMUSG00000087272 | -4,13E-01 | -2,863700402 | 1,06E-01 | 7,45E-01 | 9,29E-01 | Gm15409       | 0,75 | No  |
| ENSMUSG00000087273 | -3,80E-02 | -2,548194488 | 1,61E-03 | 9,68E-01 | 1,00E+00 | Gm13203       | 0,97 | No  |
| ENSMUSG00000087276 | 1,85E+00  | -3,107657832 | 1,35E+00 | 2,46E-01 | 5,50E-01 | Gm11378       | 3,61 | No  |
| ENSMUSG00000087277 | 1,81E-01  | -1,770687961 | 9,13E-02 | 7,63E-01 | 9,38E-01 | 2010013B24Rik | 1,13 | No  |
| ENSMUSG00000087278 | -7,07E-02 | -2,40145199  | 6,90E-03 | 9,34E-01 | 1,00E+00 | A930006I01Rik | 0,95 | No  |
| ENSMUSG00000087279 | -5,74E-01 | -2,448684796 | 4,89E-01 | 4,84E-01 | 7,72E-01 | 4930544D05Rik | 0,67 | No  |
| ENSMUSG00000087281 | -1,11E+00 | -0,344179187 | 1,02E+01 | 1,37E-03 | 2,08E-02 | Gm16015       | 0,46 | Yes |
| ENSMUSG00000087282 | 4,74E-01  | -1,322360167 | 9,16E-01 | 3,39E-01 | 6,39E-01 | Gm15317       | 1,39 | No  |
| ENSMUSG00000087283 | -3,22E+00 | -2,711747533 | 4,36E+00 | 3,67E-02 | 2,28E-01 | Gm13580       | 0,11 | No  |
| ENSMUSG00000087286 | 3,92E-02  | -1,522726328 | 6,31E-03 | 9,37E-01 | 1,00E+00 | Gm9013        | 1,03 | No  |
| ENSMUSG00000087289 | 6,47E-01  | 0,938421523  | 9,50E+00 | 2,05E-03 | 2,86E-02 | 4933424M12Rik | 1,57 | Yes |
| ENSMUSG00000087291 | 5,16E-01  | -0,322155139 | 2,15E+00 | 1,43E-01 | 4,78E-01 | Gm11946       | 1,43 | No  |
| ENSMUSG00000087293 | 2,62E+00  | -3,033654625 | 2,66E+00 | 1,03E-01 | 3,95E-01 | Gm14341       | 6,16 | No  |
| ENSMUSG00000087294 | -6,67E-02 | -2,268137015 | 6,67E-03 | 9,35E-01 | 1,00E+00 | Gm13556       | 0,95 | No  |
| ENSMUSG00000087295 | 1,94E-01  | -2,311176258 | 5,64E-02 | 8,12E-01 | 9,67E-01 | Gm3948        | 1,14 | No  |
| ENSMUSG00000087298 | -4,52E-02 | 6,341251086  | 5,06E-01 | 4,77E-01 | 7,65E-01 | Gm9392        | 0,97 | No  |
| ENSMUSG00000087299 | 3,39E-01  | 0,378918842  | 1,87E+00 | 1,71E-01 | 5,27E-01 | Gm12953       | 1,26 | No  |
| ENSMUSG00000087300 | 2,58E+00  | -2,963293274 | 2,58E+00 | 1,08E-01 | 4,03E-01 | Gm16725       | 5,98 | No  |
| ENSMUSG00000087301 | 1,34E-01  | -2,275353705 | 2,34E-02 | 8,78E-01 | 1,00E+00 | Gm13629       | 1,10 | No  |
| ENSMUSG00000087303 | -2,61E-01 | 0,656530864  | 1,28E+00 | 2,58E-01 | 5,50E-01 | Lipo2         | 0,83 | No  |
| ENSMUSG00000087305 | 1,58E-01  | -0,209428155 | 2,52E-01 | 6,15E-01 | 8,54E-01 | A430035B10Rik | 1,12 | No  |
| ENSMUSG00000087306 | 1,82E+00  | -3,033667329 | 1,31E+00 | 2,52E-01 | 5,50E-01 | A230004M16Rik | 3,54 | No  |
| ENSMUSG00000087307 | 3,09E-01  | -2,600635263 | 9,74E-02 | 7,55E-01 | 9,34E-01 | Gm12925       | 1,24 | No  |
| ENSMUSG00000087312 | -4,20E-01 | -1,863648788 | 3,67E-01 | 5,45E-01 | 8,13E-01 | Gm13833       | 0,75 | No  |
| ENSMUSG00000087314 | 3,70E-01  | 0,348277602  | 2,04E+00 | 1,53E-01 | 4,96E-01 | Prkag2os2     | 1,29 | No  |
| ENSMUSG00000087318 | 1,87E+00  | -3,107639691 | 1,38E+00 | 2,40E-01 | 5,50E-01 | Gm12114       | 3,67 | No  |
| ENSMUSG00000087319 | -1,90E+00 | -2,711718166 | 1,43E+00 | 2,31E-01 | 5,50E-01 | Gm15907       | 0,27 | No  |
| ENSMUSG00000087323 | 8,66E-01  | -2,548265824 | 9,04E-01 | 3,42E-01 | 6,42E-01 | Gm14170       | 1,82 | No  |
| ENSMUSG00000087326 | -3,42E-02 | -2,548211162 | 1,09E-03 | 9,74E-01 | 1,00E+00 | Gm12503       | 0,98 | No  |



|                    |           |              |          |          |          |               |      |     |
|--------------------|-----------|--------------|----------|----------|----------|---------------|------|-----|
| ENSMUSG00000087327 | -8,78E-01 | -0,926367236 | 4,02E+00 | 4,51E-02 | 2,53E-01 | Gm15884       | 0,54 | No  |
| ENSMUSG00000087331 | -3,78E-02 | 0,471075805  | 2,25E-02 | 8,81E-01 | 1,00E+00 | 1810021B22Rik | 0,97 | No  |
| ENSMUSG00000087337 | -2,74E+00 | -3,033596063 | 2,99E+00 | 8,38E-02 | 3,71E-01 | Gm14144       | 0,15 | No  |
| ENSMUSG00000087338 | -1,40E-01 | 2,830887646  | 1,44E+00 | 2,30E-01 | 5,50E-01 | Scpep1os      | 0,91 | No  |
| ENSMUSG00000087339 | 1,68E-01  | -0,86371961  | 1,68E-01 | 6,82E-01 | 8,94E-01 | Gm11586       | 1,12 | No  |
| ENSMUSG00000087341 | -2,22E-01 | 5,411429083  | 9,89E+00 | 1,66E-03 | 2,42E-02 | 0610040F04Rik | 0,86 | Yes |
| ENSMUSG00000087342 | -9,36E-02 | -2,655127163 | 5,77E-03 | 9,39E-01 | 1,00E+00 | Gm12238       | 0,94 | No  |
| ENSMUSG00000087343 | -1,87E+00 | -3,107637761 | 1,39E+00 | 2,38E-01 | 5,50E-01 | 1700021N21Rik | 0,27 | No  |
| ENSMUSG00000087344 | -3,16E+00 | -2,770556557 | 4,20E+00 | 4,04E-02 | 2,38E-01 | Gm15627       | 0,11 | No  |
| ENSMUSG00000087346 | 1,79E+00  | -3,033666867 | 1,28E+00 | 2,58E-01 | 5,50E-01 | Gm5699        | 3,46 | No  |
| ENSMUSG00000087347 | 1,67E-01  | -1,165750644 | 1,23E-01 | 7,26E-01 | 9,19E-01 | 1700047K16Rik | 1,12 | No  |
| ENSMUSG00000087348 | 7,53E-01  | -2,711659049 | 3,07E-01 | 5,79E-01 | 8,36E-01 | Gm15582       | 1,68 | No  |
| ENSMUSG00000087350 | 6,94E-01  | -2,963285211 | 2,59E-01 | 6,11E-01 | 8,52E-01 | Gm16254       | 1,62 | No  |
| ENSMUSG00000087351 | 3,64E-02  | -1,185489383 | 6,28E-03 | 9,37E-01 | 1,00E+00 | Gm11464       | 1,03 | No  |
| ENSMUSG00000087352 | -3,48E-01 | 4,293138379  | 1,74E+01 | 3,07E-05 | 8,93E-04 | Gm12999       | 0,79 | Yes |
| ENSMUSG00000087354 | 2,16E-02  | 2,845475756  | 3,38E-02 | 8,54E-01 | 9,92E-01 | 4930404I05Rik | 1,02 | No  |
| ENSMUSG00000087356 | -9,79E-02 | 0,006243542  | 1,22E-01 | 7,27E-01 | 9,19E-01 | Gm13856       | 0,93 | No  |
| ENSMUSG00000087357 | -3,28E-01 | 0,106762917  | 1,30E+00 | 2,54E-01 | 5,50E-01 | Gm12498       | 0,80 | No  |
| ENSMUSG00000087361 | -4,42E-01 | -2,548240811 | 1,99E-01 | 6,55E-01 | 8,79E-01 | 0610043K17Rik | 0,74 | No  |
| ENSMUSG00000087362 | 2,35E-01  | 1,44156358   | 1,62E+00 | 2,03E-01 | 5,50E-01 | Gm13710       | 1,18 | No  |
| ENSMUSG00000087364 | -2,27E+00 | -2,711704664 | 4,20E+00 | 4,04E-02 | 2,38E-01 | Gm13398       | 0,21 | No  |
| ENSMUSG00000087366 | 4,26E-01  | 3,871442369  | 2,16E+01 | 3,32E-06 | 1,28E-04 | Junos         | 1,34 | Yes |
| ENSMUSG00000087367 | -1,67E-01 | 3,886336186  | 3,36E+00 | 6,67E-02 | 3,25E-01 | Gm15491       | 0,89 | No  |
| ENSMUSG00000087370 | 1,10E-01  | 6,759571577  | 3,18E+00 | 7,44E-02 | 3,47E-01 | Tmem170b      | 1,08 | No  |
| ENSMUSG00000087371 | -2,28E-01 | -2,226337999 | 6,27E-02 | 8,02E-01 | 9,61E-01 | Gm15541       | 0,85 | No  |
| ENSMUSG00000087373 | 1,56E-01  | -2,226310955 | 4,20E-02 | 8,38E-01 | 9,82E-01 | Gm15892       | 1,11 | No  |
| ENSMUSG00000087374 | -1,94E+00 | -3,107619243 | 1,50E+00 | 2,21E-01 | 5,50E-01 | Gm15457       | 0,26 | No  |
| ENSMUSG00000087376 | 5,80E-01  | -1,896142312 | 6,67E-01 | 4,14E-01 | 7,09E-01 | Gm15517       | 1,49 | No  |
| ENSMUSG00000087377 | 6,06E-02  | -2,16575625  | 6,16E-03 | 9,37E-01 | 1,00E+00 | AV099323      | 1,04 | No  |
| ENSMUSG00000087380 | -3,70E-01 | 2,270504615  | 7,31E+00 | 6,84E-03 | 7,05E-02 | 2210408F21Rik | 0,77 | No  |
| ENSMUSG00000087381 | -6,58E-01 | 2,407664655  | 2,63E+01 | 2,91E-07 | 1,46E-05 | Gm16008       | 0,63 | Yes |
| ENSMUSG00000087384 | -4,17E-01 | -1,627721264 | 5,46E-01 | 4,60E-01 | 7,49E-01 | Gm15558       | 0,75 | No  |

|                    |           |              |          |          |          |               |      |     |
|--------------------|-----------|--------------|----------|----------|----------|---------------|------|-----|
| ENSMUSG00000087385 | 8,77E-02  | 1,070425367  | 1,92E-01 | 6,61E-01 | 8,82E-01 | Frg2f1        | 1,06 | No  |
| ENSMUSG00000087387 | -1,87E+00 | -3,107637761 | 1,39E+00 | 2,38E-01 | 5,50E-01 | Gm15420       | 0,27 | No  |
| ENSMUSG00000087393 | -1,87E+00 | -3,107637761 | 1,39E+00 | 2,38E-01 | 5,50E-01 | 1700023C21Rik | 0,27 | No  |
| ENSMUSG00000087394 | 4,67E-01  | -2,655164723 | 2,33E-01 | 6,29E-01 | 8,62E-01 | Gm12945       | 1,38 | No  |
| ENSMUSG00000087395 | -1,35E+00 | -2,832003544 | 1,14E+00 | 2,86E-01 | 5,82E-01 | Gm12705       | 0,39 | No  |
| ENSMUSG00000087398 | 2,67E+00  | -3,033636951 | 2,76E+00 | 9,68E-02 | 3,88E-01 | Gm12343       | 6,36 | No  |
| ENSMUSG00000087399 | -6,79E-01 | -3,070168314 | 1,83E-01 | 6,69E-01 | 8,87E-01 | Gm11899       | 0,62 | No  |
| ENSMUSG00000087400 | -7,94E-01 | -2,740816739 | 5,25E-01 | 4,69E-01 | 7,57E-01 | Gm15270       | 0,58 | No  |
| ENSMUSG00000087404 | -1,87E+00 | -3,033619006 | 1,41E+00 | 2,36E-01 | 5,50E-01 | Gm11752       | 0,27 | No  |
| ENSMUSG00000087405 | -1,94E-01 | -1,311171556 | 1,47E-01 | 7,01E-01 | 9,05E-01 | Gm14232       | 0,87 | No  |
| ENSMUSG00000087406 | 2,92E-01  | -0,241616093 | 7,16E-01 | 3,97E-01 | 6,98E-01 | E130215H24Rik | 1,22 | No  |
| ENSMUSG00000087408 | -1,68E-01 | -1,03649911  | 1,30E-01 | 7,19E-01 | 9,15E-01 | Cers1         | 0,89 | No  |
| ENSMUSG00000087411 | -5,35E-01 | 2,011870421  | 1,39E+01 | 1,94E-04 | 4,24E-03 | Gm16048       | 0,69 | Yes |
| ENSMUSG00000087412 | -1,04E-01 | 8,172479104  | 3,20E+00 | 7,38E-02 | 3,45E-01 | Gm15501       | 0,93 | No  |
| ENSMUSG00000087429 | -5,72E-02 | 1,53620009   | 1,06E-01 | 7,45E-01 | 9,29E-01 | Gm16235       | 0,96 | No  |
| ENSMUSG00000087430 | -2,37E-01 | -0,146041994 | 6,11E-01 | 4,34E-01 | 7,27E-01 | Gm13405       | 0,85 | No  |
| ENSMUSG00000087431 | 3,32E+00  | -2,896179856 | 4,63E+00 | 3,15E-02 | 2,06E-01 | Gm16054       | 9,96 | No  |
| ENSMUSG00000087432 | 1,20E+00  | -3,146123991 | 6,74E-01 | 4,12E-01 | 7,07E-01 | Gm15123       | 2,30 | No  |
| ENSMUSG00000087433 | 2,81E-01  | -0,541782992 | 6,65E-01 | 4,15E-01 | 7,10E-01 | Gm14167       | 1,22 | No  |
| ENSMUSG00000087434 | -1,58E-01 | -1,289500914 | 1,03E-01 | 7,49E-01 | 9,30E-01 | Rab11fip4os1  | 0,90 | No  |
| ENSMUSG00000087435 | 2,31E-01  | 1,912455283  | 2,22E+00 | 1,37E-01 | 4,66E-01 | Gm16323       | 1,17 | No  |
| ENSMUSG00000087436 | -2,43E-01 | 2,268758117  | 2,96E+00 | 8,55E-02 | 3,76E-01 | Gm16156       | 0,85 | No  |
| ENSMUSG00000087439 | -4,84E-01 | 0,288503389  | 3,64E+00 | 5,63E-02 | 2,91E-01 | Gm15788       | 0,72 | No  |
| ENSMUSG00000087440 | 1,48E-01  | 1,591234842  | 7,66E-01 | 3,81E-01 | 6,83E-01 | 4930577N17Rik | 1,11 | No  |
| ENSMUSG00000087441 | 1,87E+00  | -3,107639691 | 1,38E+00 | 2,40E-01 | 5,50E-01 | Gm13853       | 3,67 | No  |
| ENSMUSG00000087442 | -1,90E-01 | 0,202940289  | 5,07E-01 | 4,77E-01 | 7,65E-01 | Gm14453       | 0,88 | No  |
| ENSMUSG00000087443 | -1,86E-01 | 1,87587387   | 1,42E+00 | 2,34E-01 | 5,50E-01 | Ppp1r18os     | 0,88 | No  |
| ENSMUSG00000087444 | 2,57E-01  | -2,401394273 | 7,49E-02 | 7,84E-01 | 9,51E-01 | Gm5475        | 1,19 | No  |
| ENSMUSG00000087445 | 1,42E-01  | 0,581171715  | 3,72E-01 | 5,42E-01 | 8,11E-01 | Gm14286       | 1,10 | No  |
| ENSMUSG00000087449 | -5,21E-02 | -1,998001793 | 5,68E-03 | 9,40E-01 | 1,00E+00 | Gm12971       | 0,96 | No  |
| ENSMUSG00000087450 | 5,98E-01  | -0,740913033 | 2,30E+00 | 1,29E-01 | 4,51E-01 | Gm13994       | 1,51 | No  |
| ENSMUSG00000087451 | -8,11E-02 | -1,448639615 | 2,46E-02 | 8,75E-01 | 1,00E+00 | Gm12970       | 0,95 | No  |

|                    |           |              |           |          |          |               |      |     |
|--------------------|-----------|--------------|-----------|----------|----------|---------------|------|-----|
| ENSMUSG00000087452 | -2,73E+00 | -2,963241672 | 2,94E+00  | 8,62E-02 | 3,78E-01 | Gm11998       | 0,15 | No  |
| ENSMUSG00000087455 | -1,95E+00 | -3,033628749 | 1,50E+00  | 2,21E-01 | 5,50E-01 | 5330411J11Rik | 0,26 | No  |
| ENSMUSG00000087457 | -2,68E+00 | -2,896127817 | 2,86E+00  | 9,06E-02 | 3,81E-01 | Gm7799        | 0,16 | No  |
| ENSMUSG00000087458 | 1,13E-01  | 0,694179207  | 2,36E-01  | 6,27E-01 | 8,60E-01 | Gm13999       | 1,08 | No  |
| ENSMUSG00000087460 | 1,56E+00  | -2,070177172 | 3,66E+00  | 5,58E-02 | 2,90E-01 | 4930401O12Rik | 2,95 | No  |
| ENSMUSG00000087461 | -5,29E-01 | -2,65508138  | 2,19E-01  | 6,39E-01 | 8,69E-01 | C230014O12Rik | 0,69 | No  |
| ENSMUSG00000087464 | 3,14E-02  | -3,107617333 | -7,69E-10 | 1,00E+00 | 1,00E+00 | Gm12862       | 1,02 | No  |
| ENSMUSG00000087466 | -1,07E+00 | -2,832017492 | 8,64E-01  | 3,53E-01 | 6,54E-01 | A330041J22Rik | 0,47 | No  |
| ENSMUSG00000087474 | 2,08E-01  | -0,793508532 | 2,62E-01  | 6,09E-01 | 8,51E-01 | Gm12100       | 1,16 | No  |
| ENSMUSG00000087475 | 1,87E+00  | -2,89613841  | 1,36E+00  | 2,44E-01 | 5,50E-01 | 4933406I18Rik | 3,65 | No  |
| ENSMUSG00000087477 | -1,40E+00 | -2,863681692 | 1,24E+00  | 2,66E-01 | 5,62E-01 | Gm13822       | 0,38 | No  |
| ENSMUSG00000087478 | 5,50E-02  | 3,800182603  | 3,45E-01  | 5,57E-01 | 8,21E-01 | 4930506C21Rik | 1,04 | No  |
| ENSMUSG00000087480 | 4,25E-01  | -0,963355171 | 1,14E+00  | 2,86E-01 | 5,82E-01 | Gm15910       | 1,34 | No  |
| ENSMUSG00000087484 | -1,38E-01 | 1,35157184   | 6,14E-01  | 4,33E-01 | 7,27E-01 | 2900089D17Rik | 0,91 | No  |
| ENSMUSG00000087485 | 5,99E-01  | -3,033642484 | 1,43E-01  | 7,05E-01 | 9,07E-01 | Gm13383       | 1,51 | No  |
| ENSMUSG00000087486 | -3,92E-01 | 0,140458538  | 1,95E+00  | 1,63E-01 | 5,14E-01 | Gm11723       | 0,76 | No  |
| ENSMUSG00000087489 | -3,83E-02 | -3,107651936 | -7,91E-11 | 1,00E+00 | 1,00E+00 | Gm15656       | 0,97 | No  |
| ENSMUSG00000087492 | -2,01E+00 | -2,62762736  | 3,06E+00  | 8,02E-02 | 3,63E-01 | Gm15700       | 0,25 | No  |
| ENSMUSG00000087496 | -1,14E+00 | -1,896063477 | 2,97E+00  | 8,46E-02 | 3,73E-01 | Gm13523       | 0,45 | No  |
| ENSMUSG00000087497 | -2,98E-02 | 0,323762384  | 1,30E-02  | 9,09E-01 | 1,00E+00 | 2810001G20Rik | 0,98 | No  |
| ENSMUSG00000087502 | -2,45E-01 | 2,052400961  | 2,80E+00  | 9,45E-02 | 3,85E-01 | Gm16091       | 0,84 | No  |
| ENSMUSG00000087507 | -1,92E+00 | -2,963268013 | 1,46E+00  | 2,27E-01 | 5,50E-01 | Gm16141       | 0,26 | No  |
| ENSMUSG00000087515 | 2,48E-01  | 1,125277375  | 1,51E+00  | 2,19E-01 | 5,50E-01 | Gm13554       | 1,19 | No  |
| ENSMUSG00000087516 | 1,20E+00  | -3,146123991 | 6,74E-01  | 4,12E-01 | 7,07E-01 | Tbx3os1       | 2,30 | No  |
| ENSMUSG00000087518 | -5,95E-01 | 0,313634804  | 5,28E+00  | 2,16E-02 | 1,58E-01 | Gm13561       | 0,66 | No  |
| ENSMUSG00000087519 | 7,43E-02  | 1,081261222  | 1,29E-01  | 7,20E-01 | 9,15E-01 | AV039307      | 1,05 | No  |
| ENSMUSG00000087520 | 3,14E-02  | -3,107617333 | -7,69E-10 | 1,00E+00 | 1,00E+00 | Gm14389       | 1,02 | No  |
| ENSMUSG00000087523 | -6,66E-01 | 0,63634414   | 8,64E+00  | 3,29E-03 | 4,11E-02 | Gm12319       | 0,63 | Yes |
| ENSMUSG00000087524 | -1,22E+00 | -3,146113954 | 6,96E-01  | 4,04E-01 | 7,01E-01 | Gm14285       | 0,43 | No  |
| ENSMUSG00000087525 | -1,98E-02 | -3,033655952 | 2,83E-11  | 1,00E+00 | 1,00E+00 | Gm13062       | 0,99 | No  |
| ENSMUSG00000087526 | -1,97E-01 | 0,750236499  | 7,43E-01  | 3,89E-01 | 6,89E-01 | Gm15738       | 0,87 | No  |
| ENSMUSG00000087527 | -1,90E+00 | -2,770613957 | 1,44E+00  | 2,30E-01 | 5,50E-01 | Gm13656       | 0,27 | No  |

|                    |           |              |          |          |          |               |      |     |
|--------------------|-----------|--------------|----------|----------|----------|---------------|------|-----|
| ENSMUSG00000087528 | -2,14E-01 | 4,833843155  | 7,70E+00 | 5,52E-03 | 6,01E-02 | 9830144P21Rik | 0,86 | No  |
| ENSMUSG00000087530 | -4,87E-01 | -1,755612628 | 5,75E-01 | 4,48E-01 | 7,39E-01 | Gm15533       | 0,71 | No  |
| ENSMUSG00000087532 | -2,10E-01 | -2,378279997 | 5,83E-02 | 8,09E-01 | 9,65E-01 | Gm15938       | 0,86 | No  |
| ENSMUSG00000087535 | 1,15E-01  | 2,249070925  | 6,56E-01 | 4,18E-01 | 7,13E-01 | Zmiz1os1      | 1,08 | No  |
| ENSMUSG00000087538 | -1,32E+00 | -2,800960145 | 1,09E+00 | 2,96E-01 | 5,92E-01 | Gm16341       | 0,40 | No  |
| ENSMUSG00000087541 | 3,57E-02  | 1,890285028  | 5,19E-02 | 8,20E-01 | 9,71E-01 | Hopxos        | 1,03 | No  |
| ENSMUSG00000087543 | 7,83E-02  | 1,627248255  | 2,23E-01 | 6,37E-01 | 8,68E-01 | Gm16576       | 1,06 | No  |
| ENSMUSG00000087545 | 3,00E-02  | 0,810864562  | 1,76E-02 | 8,94E-01 | 1,00E+00 | Gm13966       | 1,02 | No  |
| ENSMUSG00000087547 | -8,54E-01 | -1,051615972 | 3,55E+00 | 5,96E-02 | 3,02E-01 | Platr27       | 0,55 | No  |
| ENSMUSG00000087549 | -3,77E-01 | -1,278707291 | 5,70E-01 | 4,50E-01 | 7,40E-01 | Gm13427       | 0,77 | No  |
| ENSMUSG00000087552 | 1,63E-01  | 0,796625354  | 5,54E-01 | 4,57E-01 | 7,46E-01 | Gm15819       | 1,12 | No  |
| ENSMUSG00000087554 | -5,97E-01 | -2,497557976 | 3,82E-01 | 5,36E-01 | 8,08E-01 | Gm15646       | 0,66 | No  |
| ENSMUSG00000087556 | 1,37E-01  | 1,575280661  | 6,66E-01 | 4,14E-01 | 7,10E-01 | Gm15764       | 1,10 | No  |
| ENSMUSG00000087557 | -2,68E-01 | -1,726063933 | 2,13E-01 | 6,44E-01 | 8,73E-01 | Gm15869       | 0,83 | No  |
| ENSMUSG00000087563 | -7,71E-01 | -2,655128619 | 4,95E-01 | 4,82E-01 | 7,69E-01 | Gm14205       | 0,59 | No  |
| ENSMUSG00000087564 | 1,81E+00  | -3,10765737  | 1,28E+00 | 2,58E-01 | 5,50E-01 | Gm11817       | 3,49 | No  |
| ENSMUSG00000087568 | 1,82E+00  | -2,963267579 | 1,31E+00 | 2,53E-01 | 5,50E-01 | Maats1os      | 3,52 | No  |
| ENSMUSG00000087574 | 1,27E-01  | -2,226357782 | 3,21E-02 | 8,58E-01 | 9,94E-01 | C030037D09Rik | 1,09 | No  |
| ENSMUSG00000087575 | 4,97E-01  | -2,448696205 | 3,36E-01 | 5,62E-01 | 8,25E-01 | Gm12976       | 1,41 | No  |
| ENSMUSG00000087578 | 9,15E-02  | 1,112298441  | 2,17E-01 | 6,41E-01 | 8,71E-01 | Ccdc142os     | 1,07 | No  |
| ENSMUSG00000087579 | -3,60E-01 | 0,182434909  | 1,85E+00 | 1,73E-01 | 5,30E-01 | Hectd2os      | 0,78 | No  |
| ENSMUSG00000087589 | -8,45E-01 | -1,311142257 | 2,92E+00 | 8,77E-02 | 3,78E-01 | D430040D24Rik | 0,56 | No  |
| ENSMUSG00000087590 | -4,07E-01 | 2,276638446  | 8,64E+00 | 3,29E-03 | 4,11E-02 | Epb41l4aos    | 0,75 | Yes |
| ENSMUSG00000087592 | 7,05E-01  | -2,963278876 | 2,69E-01 | 6,04E-01 | 8,49E-01 | Gm11184       | 1,63 | No  |
| ENSMUSG00000087593 | -2,94E-01 | -0,522496607 | 6,71E-01 | 4,13E-01 | 7,08E-01 | Gm16174       | 0,82 | No  |
| ENSMUSG00000087594 | -1,05E+00 | -1,015523064 | 5,77E+00 | 1,63E-02 | 1,33E-01 | BC039771      | 0,48 | No  |
| ENSMUSG00000087595 | 1,04E-01  | 1,828075742  | 4,21E-01 | 5,16E-01 | 7,97E-01 | 1810012K08Rik | 1,07 | No  |
| ENSMUSG00000087596 | 1,15E-01  | 0,61782692   | 2,36E-01 | 6,27E-01 | 8,61E-01 | Gm11715       | 1,08 | No  |
| ENSMUSG00000087597 | -5,93E-01 | -0,946083776 | 1,87E+00 | 1,72E-01 | 5,28E-01 | Gm15345       | 0,66 | No  |
| ENSMUSG00000087598 | 8,42E-02  | 3,025722675  | 6,04E-01 | 4,37E-01 | 7,30E-01 | Zfp111        | 1,06 | No  |
| ENSMUSG00000087601 | 3,85E-01  | -2,33323809  | 1,76E-01 | 6,75E-01 | 8,91E-01 | Uchl1os       | 1,31 | No  |
| ENSMUSG00000087605 | -6,85E-01 | -1,401486488 | 1,81E+00 | 1,79E-01 | 5,40E-01 | Gm15742       | 0,62 | No  |

|                    |           |              |           |          |          |               |      |     |
|--------------------|-----------|--------------|-----------|----------|----------|---------------|------|-----|
| ENSMUSG00000087606 | -3,13E-01 | -1,098184801 | 4,86E-01  | 4,86E-01 | 7,73E-01 | Gm16121       | 0,80 | No  |
| ENSMUSG00000087607 | -3,21E-01 | 2,027322692  | 4,79E+00  | 2,86E-02 | 1,92E-01 | Gm16034       | 0,80 | No  |
| ENSMUSG00000087610 | -4,76E-01 | -1,43673641  | 8,15E-01  | 3,67E-01 | 6,68E-01 | Gm16253       | 0,72 | No  |
| ENSMUSG00000087611 | 9,62E-01  | -2,378326998 | 1,31E+00  | 2,53E-01 | 5,50E-01 | 4930458D05Rik | 1,95 | No  |
| ENSMUSG00000087612 | -3,44E-01 | 3,592222497  | 1,28E+01  | 3,54E-04 | 6,93E-03 | A230005M16Rik | 0,79 | Yes |
| ENSMUSG00000087613 | 4,24E-02  | -3,033592245 | -1,17E-09 | 1,00E+00 | 1,00E+00 | Gm13855       | 1,03 | No  |
| ENSMUSG00000087614 | 9,01E-03  | -3,107646452 | -5,16E-10 | 1,00E+00 | 1,00E+00 | Gm12514       | 1,01 | No  |
| ENSMUSG00000087616 | -9,04E-02 | -2,185636931 | 1,72E-02  | 8,96E-01 | 1,00E+00 | Gm14257       | 0,94 | No  |
| ENSMUSG00000087617 | -1,94E+00 | -3,107619243 | 1,50E+00  | 2,21E-01 | 5,50E-01 | Gm14268       | 0,26 | No  |
| ENSMUSG00000087622 | -1,87E+00 | -3,107637761 | 1,39E+00  | 2,38E-01 | 5,50E-01 | Gm12290       | 0,27 | No  |
| ENSMUSG00000087623 | 3,50E-01  | 1,531359275  | 4,01E+00  | 4,52E-02 | 2,53E-01 | Gm12404       | 1,27 | No  |
| ENSMUSG00000087624 | -4,24E-01 | -0,668994488 | 1,25E+00  | 2,63E-01 | 5,58E-01 | 9230111E07Rik | 0,75 | No  |
| ENSMUSG00000087626 | -7,54E-01 | -1,097993763 | 3,19E+00  | 7,42E-02 | 3,47E-01 | Gm15050       | 0,59 | No  |
| ENSMUSG00000087627 | 3,18E+00  | -2,963245465 | 4,13E+00  | 4,21E-02 | 2,44E-01 | A230059L01Rik | 9,06 | No  |
| ENSMUSG00000087629 | 2,09E-01  | -2,548250822 | 5,45E-02  | 8,15E-01 | 9,69E-01 | Gm12246       | 1,16 | No  |
| ENSMUSG00000087630 | 6,84E-01  | -2,896181084 | 2,54E-01  | 6,14E-01 | 8,53E-01 | Gm11513       | 1,61 | No  |
| ENSMUSG00000087633 | -2,51E-01 | 3,338142807  | 5,48E+00  | 1,92E-02 | 1,47E-01 | Gm14455       | 0,84 | No  |
| ENSMUSG00000087635 | -1,03E-01 | 4,556248637  | 1,67E+00  | 1,96E-01 | 5,50E-01 | Gm13414       | 0,93 | No  |
| ENSMUSG00000087638 | -8,45E-01 | -2,963265612 | 3,92E-01  | 5,31E-01 | 8,05E-01 | Gm11773       | 0,56 | No  |
| ENSMUSG00000087639 | -4,87E-01 | 2,239059903  | 1,25E+01  | 3,97E-04 | 7,57E-03 | Gm15512       | 0,71 | Yes |
| ENSMUSG00000087641 | 9,28E-02  | -2,333208964 | 1,03E-02  | 9,19E-01 | 1,00E+00 | Gm12811       | 1,07 | No  |
| ENSMUSG00000087642 | -1,38E+00 | -2,770642915 | 1,19E+00  | 2,76E-01 | 5,73E-01 | Ighe          | 0,39 | No  |
| ENSMUSG00000087648 | -1,87E+00 | -3,107637761 | 1,39E+00  | 2,38E-01 | 5,50E-01 | E130018N17Rik | 0,27 | No  |
| ENSMUSG00000087651 | -1,19E+00 | -2,448705931 | 1,85E+00  | 1,74E-01 | 5,32E-01 | 1500009L16Rik | 0,44 | No  |
| ENSMUSG00000087654 | -9,22E-02 | -0,384011083 | 7,07E-02  | 7,90E-01 | 9,54E-01 | Gm12256       | 0,94 | No  |
| ENSMUSG00000087657 | 1,22E+00  | -3,146114919 | 6,90E-01  | 4,06E-01 | 7,02E-01 | Gm16764       | 2,33 | No  |
| ENSMUSG00000087658 | -6,30E-01 | 0,360019267  | 6,00E+00  | 1,43E-02 | 1,22E-01 | Hotairm1      | 0,65 | No  |
| ENSMUSG00000087659 | -7,89E-02 | -1,99801036  | 1,01E-02  | 9,20E-01 | 1,00E+00 | Gm12606       | 0,95 | No  |
| ENSMUSG00000087660 | -8,12E-02 | 2,768803123  | 4,68E-01  | 4,94E-01 | 7,79E-01 | B230398E01Rik | 0,95 | No  |
| ENSMUSG00000087662 | 8,12E-01  | -2,711711941 | 5,74E-01  | 4,49E-01 | 7,39E-01 | Gm11373       | 1,76 | No  |
| ENSMUSG00000087666 | -1,87E+00 | -2,963234282 | 1,41E+00  | 2,35E-01 | 5,50E-01 | B230359F08Rik | 0,27 | No  |
| ENSMUSG00000087667 | 2,08E-01  | -1,378207516 | 1,56E-01  | 6,93E-01 | 9,01E-01 | Gm13381       | 1,16 | No  |

|                    |           |              |           |          |          |               |      |    |
|--------------------|-----------|--------------|-----------|----------|----------|---------------|------|----|
| ENSMUSG00000087669 | -2,46E-01 | 0,116251302  | 7,19E-01  | 3,97E-01 | 6,97E-01 | Gm11724       | 0,84 | No |
| ENSMUSG00000087670 | 1,19E+00  | -2,600775883 | 8,82E-01  | 3,48E-01 | 6,49E-01 | 9530036M11Rik | 2,28 | No |
| ENSMUSG00000087672 | -3,38E-01 | 0,997842099  | 3,00E+00  | 8,32E-02 | 3,71E-01 | Gm15122       | 0,79 | No |
| ENSMUSG00000087674 | -1,03E+00 | -2,226217697 | 1,98E+00  | 1,59E-01 | 5,06E-01 | 4930447M23Rik | 0,49 | No |
| ENSMUSG00000087679 | 8,37E-02  | 4,58692791   | 1,11E+00  | 2,92E-01 | 5,88E-01 | Tmem250-ps    | 1,06 | No |
| ENSMUSG00000087681 | 1,62E+00  | -2,600670161 | 1,80E+00  | 1,80E-01 | 5,41E-01 | Gm13565       | 3,07 | No |
| ENSMUSG00000087683 | -3,83E-02 | -3,107651936 | -7,91E-11 | 1,00E+00 | 1,00E+00 | Gm11712       | 0,97 | No |
| ENSMUSG00000087684 | -1,49E+00 | -1,997990432 | 4,90E+00  | 2,69E-02 | 1,84E-01 | 1200007C13Rik | 0,36 | No |
| ENSMUSG00000087685 | 8,48E-01  | -2,448668205 | 8,64E-01  | 3,53E-01 | 6,54E-01 | 1700122E12Rik | 1,80 | No |
| ENSMUSG00000087687 | -2,72E-01 | 2,96800047   | 5,74E+00  | 1,66E-02 | 1,34E-01 | Pet100        | 0,83 | No |
| ENSMUSG00000087689 | -7,00E-01 | -2,998004789 | 1,97E-01  | 6,57E-01 | 8,80E-01 | Gm15845       | 0,62 | No |
| ENSMUSG00000087690 | 2,15E+00  | -2,600729099 | 3,72E+00  | 5,38E-02 | 2,84E-01 | Gm16031       | 4,45 | No |
| ENSMUSG00000087691 | -1,12E+00 | -2,770553998 | 9,48E-01  | 3,30E-01 | 6,31E-01 | Gm15674       | 0,46 | No |
| ENSMUSG00000087692 | -1,31E+00 | -2,770569813 | 1,07E+00  | 3,00E-01 | 5,96E-01 | Gm11940       | 0,40 | No |
| ENSMUSG00000087693 | 1,37E+00  | -2,896164595 | 8,69E-01  | 3,51E-01 | 6,53E-01 | Gm16191       | 2,59 | No |
| ENSMUSG00000087695 | 1,67E-01  | -1,146142778 | 1,20E-01  | 7,29E-01 | 9,20E-01 | Gm16291       | 1,12 | No |
| ENSMUSG00000087698 | -3,55E-01 | -1,088767455 | 6,03E-01  | 4,37E-01 | 7,30E-01 | Gm13031       | 0,78 | No |
| ENSMUSG00000087700 | -1,99E-01 | 4,202915546  | 5,37E+00  | 2,05E-02 | 1,54E-01 | Gm15283       | 0,87 | No |
| ENSMUSG00000087701 | -1,95E-03 | 6,253243401  | 9,29E-04  | 9,76E-01 | 1,00E+00 | Gm13493       | 1,00 | No |
| ENSMUSG00000087703 | 2,60E-01  | 2,019290057  | 2,93E+00  | 8,68E-02 | 3,78E-01 | Gm15650       | 1,20 | No |
| ENSMUSG00000087714 | -1,89E+00 | -2,832004429 | 1,43E+00  | 2,32E-01 | 5,50E-01 | Gm25827       | 0,27 | No |
| ENSMUSG00000087719 | 2,00E-01  | -2,185617077 | 5,95E-02  | 8,07E-01 | 9,64E-01 | Gm26464       | 1,15 | No |
| ENSMUSG00000087721 | -2,46E-01 | 1,179709181  | 1,49E+00  | 2,22E-01 | 5,50E-01 | Gm26280       | 0,84 | No |
| ENSMUSG00000087722 | -7,19E-01 | -3,033656316 | 2,08E-01  | 6,48E-01 | 8,75E-01 | Gm26277       | 0,61 | No |
| ENSMUSG00000087730 | -5,23E-02 | -2,963267963 | 1,24E-03  | 9,72E-01 | 1,00E+00 | Gm24650       | 0,96 | No |
| ENSMUSG00000087731 | 1,83E+00  | -3,070170406 | 1,31E+00  | 2,52E-01 | 5,50E-01 | Gm24649       | 3,55 | No |
| ENSMUSG00000087734 | -1,14E-02 | -3,033635021 | 1,50E-05  | 9,97E-01 | 1,00E+00 | Gm24646       | 0,99 | No |
| ENSMUSG00000087739 | -3,98E-02 | 0,010943465  | 1,71E-02  | 8,96E-01 | 1,00E+00 | Gm24644       | 0,97 | No |
| ENSMUSG00000087742 | -4,92E-02 | -2,896164303 | 1,11E-03  | 9,73E-01 | 1,00E+00 | Gm25152       | 0,97 | No |
| ENSMUSG00000087743 | 7,20E-01  | -2,832049462 | 2,83E-01  | 5,95E-01 | 8,44E-01 | Gm25153       | 1,65 | No |
| ENSMUSG00000087744 | 1,81E+00  | -3,10765737  | 1,28E+00  | 2,58E-01 | 5,50E-01 | Gm25149       | 3,49 | No |
| ENSMUSG00000087748 | -6,50E-02 | -1,205842747 | 1,58E-02  | 9,00E-01 | 1,00E+00 | Gm25154       | 0,96 | No |

|                    |           |              |           |          |          |         |       |    |
|--------------------|-----------|--------------|-----------|----------|----------|---------|-------|----|
| ENSMUSG00000087750 | 3,12E-01  | -1,60073297  | 2,82E-01  | 5,95E-01 | 8,44E-01 | Gm23468 | 1,24  | No |
| ENSMUSG00000087779 | -1,87E+00 | -3,107637761 | 1,39E+00  | 2,38E-01 | 5,50E-01 | Gm23765 | 0,27  | No |
| ENSMUSG00000087780 | -1,89E+00 | -3,1076441   | 1,42E+00  | 2,33E-01 | 5,50E-01 | Gm23167 | 0,27  | No |
| ENSMUSG00000087782 | 2,64E+00  | -3,033673223 | 2,69E+00  | 1,01E-01 | 3,92E-01 | Gm23169 | 6,23  | No |
| ENSMUSG00000087783 | 7,14E-01  | -2,896169271 | 2,77E-01  | 5,98E-01 | 8,45E-01 | Gm23170 | 1,64  | No |
| ENSMUSG00000087784 | -1,36E+00 | -2,896135617 | 1,16E+00  | 2,82E-01 | 5,78E-01 | Gm23171 | 0,39  | No |
| ENSMUSG00000087785 | -2,95E-01 | 0,199400605  | 1,02E+00  | 3,13E-01 | 6,13E-01 | Gm23172 | 0,82  | No |
| ENSMUSG00000087790 | -2,16E+00 | -2,472891731 | 3,69E+00  | 5,48E-02 | 2,87E-01 | Gm25970 | 0,22  | No |
| ENSMUSG00000087793 | -8,78E-01 | -2,711713309 | 4,21E-01  | 5,17E-01 | 7,97E-01 | Gm25967 | 0,54  | No |
| ENSMUSG00000087794 | 2,19E+00  | -2,146194206 | 6,36E+00  | 1,16E-02 | 1,04E-01 | Gm25966 | 4,57  | No |
| ENSMUSG00000087795 | -3,55E-02 | -0,033564052 | 1,47E-02  | 9,04E-01 | 1,00E+00 | Gm25965 | 0,98  | No |
| ENSMUSG00000087799 | 1,34E-01  | 1,913433953  | 7,40E-01  | 3,90E-01 | 6,90E-01 | Gm25961 | 1,10  | No |
| ENSMUSG00000087805 | -2,69E+00 | -2,963260181 | 2,87E+00  | 9,01E-02 | 3,80E-01 | Gm27926 | 0,16  | No |
| ENSMUSG00000087808 | 1,23E+00  | -2,99799637  | 6,84E-01  | 4,08E-01 | 7,05E-01 | Gm23435 | 2,35  | No |
| ENSMUSG00000087816 | -3,83E-02 | -3,107651936 | -7,91E-11 | 1,00E+00 | 1,00E+00 | Gm25116 | 0,97  | No |
| ENSMUSG00000087819 | -3,62E-01 | -1,079356226 | 6,26E-01  | 4,29E-01 | 7,23E-01 | Gm25117 | 0,78  | No |
| ENSMUSG00000087823 | -3,19E-01 | 1,144473882  | 2,75E+00  | 9,72E-02 | 3,89E-01 | Gm22281 | 0,80  | No |
| ENSMUSG00000087825 | -8,99E-02 | -2,77059678  | 5,46E-03  | 9,41E-01 | 1,00E+00 | Gm22279 | 0,94  | No |
| ENSMUSG00000087830 | -1,89E+00 | -3,070141541 | 1,43E+00  | 2,32E-01 | 5,50E-01 | Gm22820 | 0,27  | No |
| ENSMUSG00000087834 | -2,99E-02 | -2,832012183 | 5,67E-04  | 9,81E-01 | 1,00E+00 | Gm23957 | 0,98  | No |
| ENSMUSG00000087838 | 3,80E+00  | -2,655174628 | 6,65E+00  | 9,92E-03 | 9,27E-02 | Gm23954 | 13,90 | No |
| ENSMUSG00000087844 | 6,70E-01  | -2,963260367 | 2,39E-01  | 6,25E-01 | 8,59E-01 | Mir1958 | 1,59  | No |
| ENSMUSG00000087854 | 1,93E+00  | -2,600698872 | 2,77E+00  | 9,62E-02 | 3,87E-01 | Gm22790 | 3,80  | No |
| ENSMUSG00000087857 | 1,34E-02  | -2,963213009 | -8,25E-12 | 1,00E+00 | 1,00E+00 | Gm22791 | 1,01  | No |
| ENSMUSG00000087872 | -3,83E-02 | -3,107651936 | -7,91E-11 | 1,00E+00 | 1,00E+00 | Gm26098 | 0,97  | No |
| ENSMUSG00000087876 | -6,54E-02 | -1,378276595 | 1,80E-02  | 8,93E-01 | 1,00E+00 | Gm26102 | 0,96  | No |
| ENSMUSG00000087881 | -7,99E-02 | -2,770611286 | 5,94E-03  | 9,39E-01 | 1,00E+00 | Gm22442 | 0,95  | No |
| ENSMUSG00000087887 | -1,49E+00 | -2,497549429 | 2,31E+00  | 1,29E-01 | 4,50E-01 | Gm23598 | 0,36  | No |
| ENSMUSG00000087897 | -1,87E+00 | -3,107637761 | 1,39E+00  | 2,38E-01 | 5,50E-01 | Gm25283 | 0,27  | No |
| ENSMUSG00000087899 | 9,01E-03  | -3,107646452 | -5,16E-10 | 1,00E+00 | 1,00E+00 | Mir1942 | 1,01  | No |
| ENSMUSG00000087903 | 3,14E-02  | -3,107617333 | -7,69E-10 | 1,00E+00 | 1,00E+00 | Gm22039 | 1,02  | No |
| ENSMUSG00000087912 | -6,12E-01 | -1,205821305 | 1,57E+00  | 2,10E-01 | 5,50E-01 | Gm24916 | 0,65  | No |

|                    |           |              |           |          |          |         |      |    |
|--------------------|-----------|--------------|-----------|----------|----------|---------|------|----|
| ENSMUSG00000087915 | 1,81E+00  | -3,10765737  | 1,28E+00  | 2,58E-01 | 5,50E-01 | Gm24909 | 3,49 | No |
| ENSMUSG00000087925 | -2,69E+00 | -2,963260181 | 2,87E+00  | 9,01E-02 | 3,80E-01 | Gm23232 | 0,16 | No |
| ENSMUSG00000087926 | -1,94E+00 | -3,107619243 | 1,50E+00  | 2,21E-01 | 5,50E-01 | Gm23233 | 0,26 | No |
| ENSMUSG00000087935 | -1,46E-01 | 1,202037944  | 5,82E-01  | 4,45E-01 | 7,36E-01 | Snora81 | 0,90 | No |
| ENSMUSG00000087938 | 6,52E-02  | -1,740927908 | 1,24E-02  | 9,11E-01 | 1,00E+00 | Gm26049 | 1,05 | No |
| ENSMUSG00000087939 | 1,85E+00  | -3,107657832 | 1,35E+00  | 2,46E-01 | 5,50E-01 | Gm23676 | 3,61 | No |
| ENSMUSG00000087943 | -3,83E-02 | -3,107651936 | -7,91E-11 | 1,00E+00 | 1,00E+00 | Gm24245 | 0,97 | No |
| ENSMUSG00000087950 | -2,67E+00 | -2,831995746 | 2,85E+00  | 9,15E-02 | 3,82E-01 | Mir1948 | 0,16 | No |
| ENSMUSG00000087951 | -3,21E+00 | -2,896117057 | 4,33E+00  | 3,75E-02 | 2,30E-01 | Gm22558 | 0,11 | No |
| ENSMUSG00000087963 | -8,62E-01 | -2,89616149  | 4,08E-01  | 5,23E-01 | 8,01E-01 | Gm25394 | 0,55 | No |
| ENSMUSG00000087966 | 1,56E-01  | -2,185672188 | 4,24E-02  | 8,37E-01 | 9,81E-01 | Gm25390 | 1,11 | No |
| ENSMUSG00000087968 | -6,22E-02 | -0,600615137 | 2,62E-02  | 8,72E-01 | 1,00E+00 | Gm25395 | 0,96 | No |
| ENSMUSG00000087982 | 3,12E+00  | -2,963299398 | 3,97E+00  | 4,62E-02 | 2,57E-01 | Gm22224 | 8,71 | No |
| ENSMUSG00000087991 | 7,59E-01  | -2,770588644 | 3,12E-01  | 5,76E-01 | 8,35E-01 | Gm25057 | 1,69 | No |
| ENSMUSG00000087992 | -1,87E+00 | -3,107637761 | 1,39E+00  | 2,38E-01 | 5,50E-01 | Gm25059 | 0,27 | No |
| ENSMUSG00000087993 | -3,27E-02 | 0,55141119   | 1,88E-02  | 8,91E-01 | 1,00E+00 | Mir1982 | 0,98 | No |
| ENSMUSG00000088004 | 1,86E+00  | -2,896125762 | 1,35E+00  | 2,46E-01 | 5,50E-01 | Gm24786 | 3,63 | No |
| ENSMUSG00000088008 | -8,41E-01 | -1,226116889 | 2,56E+00  | 1,09E-01 | 4,06E-01 | Gm25492 | 0,56 | No |
| ENSMUSG00000088015 | -4,43E-01 | -2,311111892 | 2,00E-01  | 6,55E-01 | 8,79E-01 | Mir1932 | 0,74 | No |
| ENSMUSG00000088022 | 1,86E+00  | -3,033661846 | 1,35E+00  | 2,46E-01 | 5,50E-01 | Gm22146 | 3,62 | No |
| ENSMUSG00000088028 | -5,88E-02 | -3,033652696 | 1,62E-03  | 9,68E-01 | 1,00E+00 | Gm22141 | 0,96 | No |
| ENSMUSG00000088030 | -8,02E-03 | -2,997998857 | 1,50E-05  | 9,97E-01 | 1,00E+00 | Gm24991 | 0,99 | No |
| ENSMUSG00000088054 | -1,89E+00 | -3,1076441   | 1,42E+00  | 2,33E-01 | 5,50E-01 | Mir1968 | 0,27 | No |
| ENSMUSG00000088056 | -2,87E-01 | -2,311141112 | 1,23E-01  | 7,26E-01 | 9,19E-01 | Gm24262 | 0,82 | No |
| ENSMUSG00000088058 | -1,14E-02 | -3,033635021 | 1,50E-05  | 9,97E-01 | 1,00E+00 | Gm26153 | 0,99 | No |
| ENSMUSG00000088059 | 3,70E-01  | -2,460247513 | 1,83E-01  | 6,69E-01 | 8,87E-01 | Mir1949 | 1,29 | No |
| ENSMUSG00000088062 | 1,85E+00  | -3,107657832 | 1,35E+00  | 2,46E-01 | 5,50E-01 | Gm24476 | 3,61 | No |
| ENSMUSG00000088066 | 1,84E+00  | -3,033649193 | 1,33E+00  | 2,49E-01 | 5,50E-01 | Gm23253 | 3,58 | No |
| ENSMUSG00000088067 | -1,17E+00 | -2,033588271 | 2,24E+00  | 1,34E-01 | 4,61E-01 | Gm24480 | 0,44 | No |
| ENSMUSG00000088069 | -6,06E-01 | -2,146089296 | 5,01E-01  | 4,79E-01 | 7,66E-01 | Gm23250 | 0,66 | No |
| ENSMUSG00000088086 | -1,37E+00 | -2,770589857 | 1,18E+00  | 2,77E-01 | 5,73E-01 | Gm25341 | 0,39 | No |
| ENSMUSG00000088088 | -1,28E+00 | -2,711692098 | 1,29E+00  | 2,55E-01 | 5,50E-01 | Rmrp    | 0,41 | No |



|                    |           |              |           |          |          |          |      |    |
|--------------------|-----------|--------------|-----------|----------|----------|----------|------|----|
| ENSMUSG00000088102 | 4,24E-02  | -3,033592245 | -1,17E-09 | 1,00E+00 | 1,00E+00 | Gm24113  | 1,03 | No |
| ENSMUSG00000088106 | -3,22E+00 | -2,896099406 | 4,38E+00  | 3,64E-02 | 2,27E-01 | Gm22378  | 0,11 | No |
| ENSMUSG00000088108 | 2,48E-01  | -0,711764935 | 3,85E-01  | 5,35E-01 | 8,07E-01 | Snora47  | 1,19 | No |
| ENSMUSG00000088113 | -1,86E+00 | -3,033612668 | 1,39E+00  | 2,38E-01 | 5,50E-01 | Mir1960  | 0,28 | No |
| ENSMUSG00000088118 | 1,81E+00  | -3,10765737  | 1,28E+00  | 2,58E-01 | 5,50E-01 | Gm24059  | 3,49 | No |
| ENSMUSG00000088119 | -1,23E-02 | 0,019268605  | 1,81E-03  | 9,66E-01 | 1,00E+00 | Gm24060  | 0,99 | No |
| ENSMUSG00000088124 | 1,87E+00  | -3,107639691 | 1,38E+00  | 2,40E-01 | 5,50E-01 | Gm22867  | 3,67 | No |
| ENSMUSG00000088128 | -1,89E+00 | -3,1076441   | 1,42E+00  | 2,33E-01 | 5,50E-01 | Gm25720  | 0,27 | No |
| ENSMUSG00000088134 | -1,87E+00 | -3,107637761 | 1,39E+00  | 2,38E-01 | 5,50E-01 | Gm22310  | 0,27 | No |
| ENSMUSG00000088139 | -3,83E-02 | -3,107651936 | -7,91E-11 | 1,00E+00 | 1,00E+00 | Gm27343  | 0,97 | No |
| ENSMUSG00000088151 | 4,82E-01  | -2,497581075 | 3,16E-01  | 5,74E-01 | 8,33E-01 | Gm26347  | 1,40 | No |
| ENSMUSG00000088153 | -3,97E-01 | -1,896084671 | 3,66E-01  | 5,45E-01 | 8,13E-01 | Gm26348  | 0,76 | No |
| ENSMUSG00000088158 | 2,58E-01  | -2,702527515 | 5,50E-02  | 8,15E-01 | 9,68E-01 | Scarna3b | 1,20 | No |
| ENSMUSG00000088164 | -1,89E+00 | -3,1076441   | 1,42E+00  | 2,33E-01 | 5,50E-01 | Gm23534  | 0,27 | No |
| ENSMUSG00000088165 | -3,83E-02 | -3,107651936 | -7,91E-11 | 1,00E+00 | 1,00E+00 | Gm23533  | 0,97 | No |
| ENSMUSG00000088168 | 3,14E-02  | -3,107617333 | -7,69E-10 | 1,00E+00 | 1,00E+00 | Gm23540  | 1,02 | No |
| ENSMUSG00000088169 | 5,25E-01  | -2,205870272 | 3,42E-01  | 5,59E-01 | 8,22E-01 | Gm22059  | 1,44 | No |
| ENSMUSG00000088170 | -1,74E-01 | -0,215967388 | 2,99E-01  | 5,84E-01 | 8,38E-01 | Gm25219  | 0,89 | No |
| ENSMUSG00000088171 | 1,10E+00  | -2,548225701 | 1,16E+00  | 2,82E-01 | 5,79E-01 | Gm25220  | 2,15 | No |
| ENSMUSG00000088176 | -1,45E+00 | -1,879743281 | 3,77E+00  | 5,22E-02 | 2,78E-01 | Gm23094  | 0,37 | No |
| ENSMUSG00000088183 | 8,56E-01  | -0,600678092 | 4,87E+00  | 2,74E-02 | 1,86E-01 | Gm22215  | 1,81 | No |
| ENSMUSG00000088184 | -1,89E+00 | -3,1076441   | 1,42E+00  | 2,33E-01 | 5,50E-01 | Gm23137  | 0,27 | No |
| ENSMUSG00000088185 | -1,94E+00 | -3,107619243 | 1,50E+00  | 2,21E-01 | 5,50E-01 | Scarna2  | 0,26 | No |
| ENSMUSG00000088188 | -1,89E+00 | -3,1076441   | 1,42E+00  | 2,33E-01 | 5,50E-01 | Gm22214  | 0,27 | No |
| ENSMUSG00000088189 | -1,90E+00 | -2,963262532 | 1,44E+00  | 2,31E-01 | 5,50E-01 | Gm22213  | 0,27 | No |
| ENSMUSG00000088200 | -1,36E+00 | -2,548191839 | 1,16E+00  | 2,82E-01 | 5,78E-01 | Gm23753  | 0,39 | No |
| ENSMUSG00000088207 | 1,87E+00  | -3,107639691 | 1,38E+00  | 2,40E-01 | 5,50E-01 | Gm23756  | 3,67 | No |
| ENSMUSG00000088208 | 1,23E+00  | -2,185699217 | 1,48E+00  | 2,23E-01 | 5,50E-01 | Gm23751  | 2,34 | No |
| ENSMUSG00000088217 | -4,72E-01 | -1,831949292 | 6,84E-01  | 4,08E-01 | 7,05E-01 | Gm22079  | 0,72 | No |
| ENSMUSG00000088219 | -1,82E-01 | 1,144341178  | 8,01E-01  | 3,71E-01 | 6,72E-01 | Gm22077  | 0,88 | No |
| ENSMUSG00000088220 | -1,87E+00 | -3,107637761 | 1,39E+00  | 2,38E-01 | 5,50E-01 | Gm22601  | 0,27 | No |
| ENSMUSG00000088224 | 7,84E-01  | -2,497639543 | 5,35E-01  | 4,64E-01 | 7,53E-01 | Gm25406  | 1,72 | No |

|                    |           |              |           |          |          |         |      |     |
|--------------------|-----------|--------------|-----------|----------|----------|---------|------|-----|
| ENSMUSG00000088226 | 1,78E-01  | -0,175693449 | 3,41E-01  | 5,59E-01 | 8,22E-01 | Gm22596 | 1,13 | No  |
| ENSMUSG00000088229 | -5,88E-02 | -3,033616507 | 1,62E-03  | 9,68E-01 | 1,00E+00 | Gm22604 | 0,96 | No  |
| ENSMUSG00000088230 | -2,65E+00 | -2,963225595 | 2,80E+00  | 9,41E-02 | 3,84E-01 | Gm25427 | 0,16 | No  |
| ENSMUSG00000088231 | 3,14E-02  | -3,107617333 | -7,69E-10 | 1,00E+00 | 1,00E+00 | Gm25426 | 1,02 | No  |
| ENSMUSG00000088246 | -9,66E-01 | 1,571123067  | 3,09E+01  | 2,68E-08 | 1,70E-06 | Gm25911 | 0,51 | Yes |
| ENSMUSG00000088248 | 1,63E+00  | -2,548184306 | 1,83E+00  | 1,76E-01 | 5,36E-01 | Mir1969 | 3,10 | No  |
| ENSMUSG00000088249 | 1,87E+00  | -3,107639691 | 1,38E+00  | 2,40E-01 | 5,50E-01 | Gm25908 | 3,67 | No  |
| ENSMUSG00000088250 | 1,70E+00  | -2,146132028 | 4,52E+00  | 3,36E-02 | 2,15E-01 | Gm26393 | 3,25 | No  |
| ENSMUSG00000088252 | 1,89E+00  | -3,033614598 | 1,38E+00  | 2,40E-01 | 5,50E-01 | Snord13 | 3,70 | No  |
| ENSMUSG00000088254 | -1,87E+00 | -3,033619006 | 1,41E+00  | 2,36E-01 | 5,50E-01 | Gm24289 | 0,27 | No  |
| ENSMUSG00000088259 | -5,99E-02 | -2,963282181 | -7,02E-11 | 1,00E+00 | 1,00E+00 | Gm24290 | 0,96 | No  |
| ENSMUSG00000088268 | -4,46E-01 | -1,5226877   | 7,39E-01  | 3,90E-01 | 6,90E-01 | Gm24776 | 0,73 | No  |
| ENSMUSG00000088273 | 1,10E-01  | -1,997925287 | 2,38E-02  | 8,77E-01 | 1,00E+00 | Gm23123 | 1,08 | No  |
| ENSMUSG00000088281 | 1,81E+00  | -3,10765737  | 1,28E+00  | 2,58E-01 | 5,50E-01 | Gm23585 | 3,49 | No  |
| ENSMUSG00000088291 | -1,89E+00 | -3,1076441   | 1,42E+00  | 2,33E-01 | 5,50E-01 | Gm26412 | 0,27 | No  |
| ENSMUSG00000088293 | -3,88E-03 | -3,03362684  | 4,02E-12  | 1,00E+00 | 1,00E+00 | Gm26411 | 1,00 | No  |
| ENSMUSG00000088299 | -1,87E+00 | -2,83199895  | 1,42E+00  | 2,34E-01 | 5,50E-01 | Gm26414 | 0,27 | No  |
| ENSMUSG00000088302 | 1,87E+00  | -3,107639691 | 1,38E+00  | 2,40E-01 | 5,50E-01 | Zakit   | 3,67 | No  |
| ENSMUSG00000088303 | -1,90E+00 | -3,033647263 | 1,44E+00  | 2,30E-01 | 5,50E-01 | Gm23382 | 0,27 | No  |
| ENSMUSG00000088308 | -2,93E-01 | -2,226322501 | 1,49E-01  | 7,00E-01 | 9,04E-01 | Gm24507 | 0,82 | No  |
| ENSMUSG00000088314 | -9,15E-01 | -2,226263788 | 1,26E+00  | 2,62E-01 | 5,56E-01 | Gm26186 | 0,53 | No  |
| ENSMUSG00000088323 | 6,86E-01  | -2,548282323 | 4,67E-01  | 4,94E-01 | 7,80E-01 | Gm25663 | 1,61 | No  |
| ENSMUSG00000088325 | 2,64E+00  | -3,033673223 | 2,69E+00  | 1,01E-01 | 3,92E-01 | Gm25668 | 6,23 | No  |
| ENSMUSG00000088326 | -5,15E-01 | -2,627657525 | 2,39E-01  | 6,25E-01 | 8,59E-01 | Gm25667 | 0,70 | No  |
| ENSMUSG00000088332 | -1,03E+00 | -2,146140858 | 1,99E+00  | 1,58E-01 | 5,05E-01 | Gm22847 | 0,49 | No  |
| ENSMUSG00000088338 | 2,60E+00  | -3,033663463 | 2,61E+00  | 1,06E-01 | 3,99E-01 | Gm22849 | 6,06 | No  |
| ENSMUSG00000088348 | 1,35E-02  | 1,789002602  | 7,08E-03  | 9,33E-01 | 1,00E+00 | Gm23865 | 1,01 | No  |
| ENSMUSG00000088351 | 7,30E-01  | -2,289511512 | 6,19E-01  | 4,31E-01 | 7,25E-01 | Gm24016 | 1,66 | No  |
| ENSMUSG00000088352 | -3,83E-02 | -3,107651936 | -7,91E-11 | 1,00E+00 | 1,00E+00 | Gm24013 | 0,97 | No  |
| ENSMUSG00000088357 | 4,94E-01  | -1,03359051  | 1,27E+00  | 2,60E-01 | 5,53E-01 | Gm24011 | 1,41 | No  |
| ENSMUSG00000088363 | 1,20E+00  | -3,146123991 | 6,74E-01  | 4,12E-01 | 7,07E-01 | Gm23497 | 2,30 | No  |
| ENSMUSG00000088366 | 1,89E+00  | -3,033614598 | 1,38E+00  | 2,40E-01 | 5,50E-01 | Gm23496 | 3,70 | No  |

|                    |           |              |           |          |          |         |  |      |    |
|--------------------|-----------|--------------|-----------|----------|----------|---------|--|------|----|
| ENSMUSG00000088367 | 1,86E+00  | -2,963277112 | 1,35E+00  | 2,46E-01 | 5,50E-01 | Gm26320 |  | 3,62 | No |
| ENSMUSG00000088371 | 1,82E+00  | -3,033667329 | 1,31E+00  | 2,52E-01 | 5,50E-01 | Gm25180 |  | 3,54 | No |
| ENSMUSG00000088372 | -3,83E-02 | -3,107651936 | -7,91E-11 | 1,00E+00 | 1,00E+00 | Gm22881 |  | 0,97 | No |
| ENSMUSG00000088373 | 8,28E-02  | -2,424885816 | 9,09E-03  | 9,24E-01 | 1,00E+00 | Mir1956 |  | 1,06 | No |
| ENSMUSG00000088378 | -2,10E-01 | -0,697310675 | 3,18E-01  | 5,73E-01 | 8,32E-01 | Gm25184 |  | 0,86 | No |
| ENSMUSG00000088385 | -6,14E-01 | -2,146102397 | 7,32E-01  | 3,92E-01 | 6,92E-01 | Gm24689 |  | 0,65 | No |
| ENSMUSG00000088386 | 1,85E+00  | -3,107657832 | 1,35E+00  | 2,46E-01 | 5,50E-01 | Gm24692 |  | 3,61 | No |
| ENSMUSG00000088393 | -2,70E+00 | -2,96323619  | 2,89E+00  | 8,89E-02 | 3,79E-01 | Gm26308 |  | 0,15 | No |
| ENSMUSG00000088400 | 1,03E+00  | -2,185737837 | 1,72E+00  | 1,89E-01 | 5,50E-01 | Gm25889 |  | 2,04 | No |
| ENSMUSG00000088402 | -1,67E-02 | -2,963250293 | 1,29E-04  | 9,91E-01 | 1,00E+00 | Gm25887 |  | 0,99 | No |
| ENSMUSG00000088410 | 4,34E-01  | -2,711748989 | 1,47E-01  | 7,01E-01 | 9,05E-01 | Gm24240 |  | 1,35 | No |
| ENSMUSG00000088412 | 2,15E+00  | -2,655139965 | 3,72E+00  | 5,39E-02 | 2,84E-01 | Gm24241 |  | 4,45 | No |
| ENSMUSG00000088414 | -1,33E+00 | -2,770596546 | 1,11E+00  | 2,92E-01 | 5,88E-01 | Mir1967 |  | 0,40 | No |
| ENSMUSG00000088416 | 1,80E+00  | -2,896183946 | 1,30E+00  | 2,55E-01 | 5,50E-01 | Gm24239 |  | 3,48 | No |
| ENSMUSG00000088420 | 4,58E-01  | -2,448745828 | 2,24E-01  | 6,36E-01 | 8,67E-01 | Gm22551 |  | 1,37 | No |
| ENSMUSG00000088437 | -5,72E-01 | -2,548220847 | 2,56E-01  | 6,13E-01 | 8,53E-01 | Gm24198 |  | 0,67 | No |
| ENSMUSG00000088439 | 8,35E-01  | -1,146333084 | 2,64E+00  | 1,04E-01 | 3,97E-01 | Gm25386 |  | 1,78 | No |
| ENSMUSG00000088442 | -3,16E-01 | -0,322141633 | 8,54E-01  | 3,55E-01 | 6,57E-01 | Gm23553 |  | 0,80 | No |
| ENSMUSG00000088453 | -1,94E+00 | -3,107619243 | 1,50E+00  | 2,21E-01 | 5,50E-01 | Gm25706 |  | 0,26 | No |
| ENSMUSG00000088456 | -1,37E+00 | -2,832009415 | 1,18E+00  | 2,77E-01 | 5,74E-01 | Gm26372 |  | 0,39 | No |
| ENSMUSG00000088473 | 1,81E+00  | -3,10765737  | 1,28E+00  | 2,58E-01 | 5,50E-01 | Gm23078 |  | 3,49 | No |
| ENSMUSG00000088475 | 1,85E+00  | -3,107657832 | 1,35E+00  | 2,46E-01 | 5,50E-01 | Gm23084 |  | 3,61 | No |
| ENSMUSG00000088482 | -1,86E+00 | -2,963227946 | 1,40E+00  | 2,36E-01 | 5,50E-01 | Gm23641 |  | 0,28 | No |
| ENSMUSG00000088484 | 3,14E-02  | -3,107617333 | -7,69E-10 | 1,00E+00 | 1,00E+00 | Gm23592 |  | 1,02 | No |
| ENSMUSG00000088485 | -3,34E-02 | -2,770617053 | 7,57E-04  | 9,78E-01 | 1,00E+00 | Gm23640 |  | 0,98 | No |
| ENSMUSG00000088490 | -5,23E-02 | -2,963267963 | 1,24E-03  | 9,72E-01 | 1,00E+00 | Gm24400 |  | 0,96 | No |
| ENSMUSG00000088491 | -2,63E-02 | -3,033653157 | 2,33E-04  | 9,88E-01 | 1,00E+00 | Mir1953 |  | 0,98 | No |
| ENSMUSG00000088494 | 1,76E+00  | -2,497620093 | 3,56E+00  | 5,93E-02 | 3,01E-01 | Gm24399 |  | 3,38 | No |
| ENSMUSG00000088497 | 1,85E+00  | -3,107657832 | 1,35E+00  | 2,46E-01 | 5,50E-01 | Gm22651 |  | 3,61 | No |
| ENSMUSG00000088499 | 7,27E-01  | -2,832025945 | 2,88E-01  | 5,91E-01 | 8,42E-01 | Gm22654 |  | 1,66 | No |
| ENSMUSG00000088504 | -1,89E+00 | -3,033648118 | 1,42E+00  | 2,33E-01 | 5,50E-01 | Gm26490 |  | 0,27 | No |
| ENSMUSG00000088506 | 1,87E+00  | -3,107639691 | 1,38E+00  | 2,40E-01 | 5,50E-01 | Gm24409 |  | 3,67 | No |

|                    |           |              |           |          |          |          |      |     |
|--------------------|-----------|--------------|-----------|----------|----------|----------|------|-----|
| ENSMUSG00000088524 | -4,65E-01 | 1,48702067   | 6,64E+00  | 9,96E-03 | 9,30E-02 | Snord2   | 0,72 | No  |
| ENSMUSG00000088529 | -6,46E-02 | -1,021589011 | 2,10E-02  | 8,85E-01 | 1,00E+00 | Gm26083  | 0,96 | No  |
| ENSMUSG00000088537 | 1,86E+00  | -3,033661846 | 1,35E+00  | 2,46E-01 | 5,50E-01 | Gm23279  | 3,62 | No  |
| ENSMUSG00000088544 | -7,60E-02 | -2,424863094 | 6,61E-03  | 9,35E-01 | 1,00E+00 | Mir1945  | 0,95 | No  |
| ENSMUSG00000088545 | -1,87E+00 | -3,03364178  | 1,41E+00  | 2,36E-01 | 5,50E-01 | Gm25982  | 0,27 | No  |
| ENSMUSG00000088549 | 2,95E-01  | -2,627690926 | 8,85E-02  | 7,66E-01 | 9,40E-01 | Gm24959  | 1,23 | No  |
| ENSMUSG00000088552 | -2,32E-01 | -0,006770683 | 5,89E-01  | 4,43E-01 | 7,34E-01 | Mir1957a | 0,85 | No  |
| ENSMUSG00000088553 | 1,81E+00  | -3,10765737  | 1,28E+00  | 2,58E-01 | 5,50E-01 | Gm22101  | 3,49 | No  |
| ENSMUSG00000088555 | -1,89E+00 | -3,1076441   | 1,42E+00  | 2,33E-01 | 5,50E-01 | Gm22098  | 0,27 | No  |
| ENSMUSG00000088559 | 9,75E-01  | -2,627637673 | 8,67E-01  | 3,52E-01 | 6,53E-01 | Mir1981  | 1,97 | No  |
| ENSMUSG00000088564 | -2,66E+00 | -3,033639428 | 2,81E+00  | 9,35E-02 | 3,83E-01 | Gm23782  | 0,16 | No  |
| ENSMUSG00000088566 | 4,24E-02  | -3,033592245 | -1,17E-09 | 1,00E+00 | 1,00E+00 | Gm23783  | 1,03 | No  |
| ENSMUSG00000088570 | 1,81E+00  | -3,10765737  | 1,28E+00  | 2,58E-01 | 5,50E-01 | Gm24531  | 3,49 | No  |
| ENSMUSG00000088573 | 1,89E+00  | -3,033614598 | 1,38E+00  | 2,40E-01 | 5,50E-01 | Gm24530  | 3,70 | No  |
| ENSMUSG00000088575 | 1,86E+00  | -3,033661846 | 1,35E+00  | 2,46E-01 | 5,50E-01 | Gm24537  | 3,62 | No  |
| ENSMUSG00000088591 | 6,49E-01  | -1,963315616 | 8,55E-01  | 3,55E-01 | 6,56E-01 | Gm23964  | 1,57 | No  |
| ENSMUSG00000088597 | -4,08E-02 | -2,963255775 | 7,59E-04  | 9,78E-01 | 1,00E+00 | Gm24584  | 0,97 | No  |
| ENSMUSG00000088600 | -3,04E-01 | -2,311205017 | 1,38E-01  | 7,10E-01 | 9,09E-01 | Gm24189  | 0,81 | No  |
| ENSMUSG00000088602 | 2,12E-01  | -2,268063229 | 5,68E-02  | 8,12E-01 | 9,67E-01 | Gm24191  | 1,16 | No  |
| ENSMUSG00000088605 | -1,92E+00 | -3,0336536   | 1,46E+00  | 2,27E-01 | 5,50E-01 | Gm24188  | 0,26 | No  |
| ENSMUSG00000088608 | 6,15E-01  | -2,548200609 | 4,22E-01  | 5,16E-01 | 7,97E-01 | Gm24186  | 1,53 | No  |
| ENSMUSG00000088609 | -6,70E-01 | 2,560330776  | 2,67E+01  | 2,40E-07 | 1,24E-05 | Gm24187  | 0,63 | Yes |
| ENSMUSG00000088615 | 1,19E+00  | -2,896162137 | 8,72E-01  | 3,50E-01 | 6,52E-01 | Gm22485  | 2,28 | No  |
| ENSMUSG00000088618 | -1,89E+00 | -3,1076441   | 1,42E+00  | 2,33E-01 | 5,50E-01 | Gm24808  | 0,27 | No  |
| ENSMUSG00000088622 | 7,54E-01  | -2,83200271  | 3,09E-01  | 5,78E-01 | 8,36E-01 | Gm23316  | 1,69 | No  |
| ENSMUSG00000088623 | 4,70E-01  | -2,655141415 | 1,72E-01  | 6,78E-01 | 8,92E-01 | Gm23031  | 1,39 | No  |
| ENSMUSG00000088625 | -1,91E-01 | -1,472983199 | 1,15E-01  | 7,35E-01 | 9,24E-01 | Gm23318  | 0,88 | No  |
| ENSMUSG00000088626 | -6,06E-02 | -2,770622069 | 2,49E-03  | 9,60E-01 | 1,00E+00 | Gm23034  | 0,96 | No  |
| ENSMUSG00000088629 | -1,76E+00 | -2,655100144 | 2,16E+00  | 1,41E-01 | 4,75E-01 | Gm23030  | 0,29 | No  |
| ENSMUSG00000088631 | 1,21E+00  | -2,770598708 | 9,04E-01  | 3,42E-01 | 6,42E-01 | Gm22311  | 2,31 | No  |
| ENSMUSG00000088632 | 1,53E-01  | -1,436812045 | 8,92E-02  | 7,65E-01 | 9,40E-01 | Gm22314  | 1,11 | No  |
| ENSMUSG00000088634 | 5,24E-01  | -1,464928379 | 8,16E-01  | 3,66E-01 | 6,67E-01 | Gm24958  | 1,44 | No  |

|                    |           |              |           |          |          |          |      |     |
|--------------------|-----------|--------------|-----------|----------|----------|----------|------|-----|
| ENSMUSG00000088637 | 2,64E+00  | -2,963288486 | 2,69E+00  | 1,01E-01 | 3,92E-01 | Gm22316  | 6,24 | No  |
| ENSMUSG00000088639 | -1,32E+00 | -2,711696132 | 1,09E+00  | 2,96E-01 | 5,92E-01 | Mir1955  | 0,40 | No  |
| ENSMUSG00000088641 | 1,81E+00  | -3,10765737  | 1,28E+00  | 2,58E-01 | 5,50E-01 | Gm26483  | 3,49 | No  |
| ENSMUSG00000088643 | -4,83E-01 | -1,355583812 | 9,74E-01  | 3,24E-01 | 6,24E-01 | Gm26484  | 0,72 | No  |
| ENSMUSG00000088646 | -2,65E+00 | -3,033633091 | 2,78E+00  | 9,55E-02 | 3,86E-01 | Gm26486  | 0,16 | No  |
| ENSMUSG00000088650 | 1,61E+00  | -2,711734076 | 1,77E+00  | 1,84E-01 | 5,47E-01 | Gm24854  | 3,04 | No  |
| ENSMUSG00000088651 | 7,97E-02  | 0,641566824  | 1,17E-01  | 7,32E-01 | 9,22E-01 | Gm24853  | 1,06 | No  |
| ENSMUSG00000088658 | -3,23E-01 | -1,09807698  | 4,93E-01  | 4,83E-01 | 7,70E-01 | Gm24846  | 0,80 | No  |
| ENSMUSG00000088670 | -1,89E+00 | -3,1076441   | 1,42E+00  | 2,33E-01 | 5,50E-01 | Gm23663  | 0,27 | No  |
| ENSMUSG00000088672 | 1,19E+00  | -2,896162137 | 8,72E-01  | 3,50E-01 | 6,52E-01 | Gm23664  | 2,28 | No  |
| ENSMUSG00000088677 | 7,31E-01  | -2,963243158 | 2,91E-01  | 5,90E-01 | 8,41E-01 | Gm22804  | 1,66 | No  |
| ENSMUSG00000088685 | -4,14E+00 | -2,600641369 | 8,70E+00  | 3,19E-03 | 4,02E-02 | Gm23995  | 0,06 | Yes |
| ENSMUSG00000088688 | 1,87E+00  | -3,107639691 | 1,38E+00  | 2,40E-01 | 5,50E-01 | Gm24000  | 3,67 | No  |
| ENSMUSG00000088693 | 9,01E-03  | -3,107646452 | -5,16E-10 | 1,00E+00 | 1,00E+00 | Gm22330  | 1,01 | No  |
| ENSMUSG00000088695 | -1,17E+00 | -2,863710212 | 8,10E-01  | 3,68E-01 | 6,69E-01 | Gm22334  | 0,44 | No  |
| ENSMUSG00000088696 | -3,09E-01 | -1,810858511 | 2,41E-01  | 6,24E-01 | 8,58E-01 | Gm22333  | 0,81 | No  |
| ENSMUSG00000088699 | 9,01E-03  | -3,107646452 | -5,16E-10 | 1,00E+00 | 1,00E+00 | Gm22328  | 1,01 | No  |
| ENSMUSG00000088702 | -4,87E-01 | -1,785749673 | 7,00E-01  | 4,03E-01 | 7,01E-01 | Gm25556  | 0,71 | No  |
| ENSMUSG00000088703 | -3,83E-02 | -3,107651936 | -7,91E-11 | 1,00E+00 | 1,00E+00 | Gm25555  | 0,97 | No  |
| ENSMUSG00000088705 | -4,60E-01 | -1,522670499 | 7,36E-01  | 3,91E-01 | 6,91E-01 | Gm25549  | 0,73 | No  |
| ENSMUSG00000088708 | 7,23E-01  | -2,600642041 | 2,85E-01  | 5,93E-01 | 8,43E-01 | Gm25558  | 1,65 | No  |
| ENSMUSG00000088712 | 2,37E-01  | -0,704684595 | 3,59E-01  | 5,49E-01 | 8,16E-01 | Gm22728  | 1,18 | No  |
| ENSMUSG00000088742 | 2,43E-01  | -2,226179936 | 7,41E-02  | 7,85E-01 | 9,52E-01 | Gm23222  | 1,18 | No  |
| ENSMUSG00000088744 | -1,98E-02 | -3,033655952 | 2,83E-11  | 1,00E+00 | 1,00E+00 | Gm23223  | 0,99 | No  |
| ENSMUSG00000088752 | 5,96E-01  | -2,40140861  | 3,96E-01  | 5,29E-01 | 8,05E-01 | Mir1934  | 1,51 | No  |
| ENSMUSG00000088758 | 7,29E-01  | -2,832014431 | 2,89E-01  | 5,91E-01 | 8,41E-01 | Gm24898  | 1,66 | No  |
| ENSMUSG00000088761 | 1,84E+00  | -3,033632273 | 1,33E+00  | 2,49E-01 | 5,50E-01 | Gm24392  | 3,58 | No  |
| ENSMUSG00000088763 | 6,36E-02  | -1,832053471 | 1,09E-02  | 9,17E-01 | 1,00E+00 | Gm24391  | 1,05 | No  |
| ENSMUSG00000088777 | 2,70E-02  | -1,548284158 | 2,30E-03  | 9,62E-01 | 1,00E+00 | Gm26039  | 1,02 | No  |
| ENSMUSG00000088789 | 6,81E-02  | -2,401409641 | 5,58E-03  | 9,40E-01 | 1,00E+00 | Scarna13 | 1,05 | No  |
| ENSMUSG00000088790 | 9,01E-03  | -3,107646452 | -5,16E-10 | 1,00E+00 | 1,00E+00 | Gm22541  | 1,01 | No  |
| ENSMUSG00000088793 | -1,89E+00 | -3,1076441   | 1,42E+00  | 2,33E-01 | 5,50E-01 | Gm22540  | 0,27 | No  |

|                    |           |              |           |          |          |         |      |    |
|--------------------|-----------|--------------|-----------|----------|----------|---------|------|----|
| ENSMUSG00000088804 | -1,94E+00 | -3,107619243 | 1,50E+00  | 2,21E-01 | 5,50E-01 | Gm24076 | 0,26 | No |
| ENSMUSG00000088822 | 7,31E-01  | -2,963279337 | 2,91E-01  | 5,90E-01 | 8,41E-01 | Gm25225 | 1,66 | No |
| ENSMUSG00000088832 | -4,13E-02 | -3,033659495 | 7,08E-04  | 9,79E-01 | 1,00E+00 | Gm23543 | 0,97 | No |
| ENSMUSG00000088835 | -3,75E-01 | -0,926400479 | 6,89E-01  | 4,06E-01 | 7,03E-01 | Gm23547 | 0,77 | No |
| ENSMUSG00000088836 | -3,83E-02 | -3,107651936 | -7,91E-11 | 1,00E+00 | 1,00E+00 | Gm23546 | 0,97 | No |
| ENSMUSG00000088843 | -3,83E-02 | -3,107651936 | -7,91E-11 | 1,00E+00 | 1,00E+00 | Gm26357 | 0,97 | No |
| ENSMUSG00000088849 | -4,13E-02 | -3,033659495 | 7,08E-04  | 9,79E-01 | 1,00E+00 | Gm26353 | 0,97 | No |
| ENSMUSG00000088853 | -1,87E+00 | -3,107637761 | 1,39E+00  | 2,38E-01 | 5,50E-01 | Gm24730 | 0,27 | No |
| ENSMUSG00000088856 | 4,72E-01  | -2,107786372 | 4,31E-01  | 5,12E-01 | 7,94E-01 | Gm24727 | 1,39 | No |
| ENSMUSG00000088857 | 1,85E+00  | -3,107657832 | 1,35E+00  | 2,46E-01 | 5,50E-01 | Gm24726 | 3,61 | No |
| ENSMUSG00000088860 | 1,25E+00  | -2,268155433 | 2,14E+00  | 1,44E-01 | 4,79E-01 | Mir1947 | 2,38 | No |
| ENSMUSG00000088873 | 1,85E+00  | -3,107657832 | 1,35E+00  | 2,46E-01 | 5,50E-01 | Gm25864 | 3,61 | No |
| ENSMUSG00000088875 | -1,90E+00 | -3,033647263 | 1,44E+00  | 2,30E-01 | 5,50E-01 | Gm25862 | 0,27 | No |
| ENSMUSG00000088891 | -1,17E+00 | -1,895975578 | 2,70E+00  | 1,00E-01 | 3,92E-01 | Gm22516 | 0,44 | No |
| ENSMUSG00000088892 | -1,87E+00 | -3,033619006 | 1,41E+00  | 2,36E-01 | 5,50E-01 | Gm22518 | 0,27 | No |
| ENSMUSG00000088894 | -2,63E-02 | -3,033641358 | 2,33E-04  | 9,88E-01 | 1,00E+00 | Gm22520 | 0,98 | No |
| ENSMUSG00000088895 | -1,23E+00 | -2,998015869 | 7,15E-01  | 3,98E-01 | 6,98E-01 | Gm22519 | 0,43 | No |
| ENSMUSG00000088900 | 1,13E-01  | -2,10761787  | 2,53E-02  | 8,74E-01 | 1,00E+00 | Gm25436 | 1,08 | No |
| ENSMUSG00000088901 | -1,17E+00 | -1,929312263 | 2,22E+00  | 1,36E-01 | 4,65E-01 | Mir1943 | 0,45 | No |
| ENSMUSG00000088909 | 4,36E-01  | -1,246956698 | 7,86E-01  | 3,75E-01 | 6,76E-01 | Gm25432 | 1,35 | No |
| ENSMUSG00000088913 | -9,51E-01 | -2,548170569 | 7,93E-01  | 3,73E-01 | 6,74E-01 | Gm22611 | 0,52 | No |
| ENSMUSG00000088916 | -2,66E+00 | -2,9632547   | 2,82E+00  | 9,28E-02 | 3,83E-01 | Gm22607 | 0,16 | No |
| ENSMUSG00000088929 | 2,81E-01  | -0,03371261  | 8,67E-01  | 3,52E-01 | 6,53E-01 | Gm24299 | 1,21 | No |
| ENSMUSG00000088932 | 1,21E-01  | 1,043298825  | 3,28E-01  | 5,67E-01 | 8,29E-01 | Gm25920 | 1,09 | No |
| ENSMUSG00000088947 | -1,45E-02 | -3,107649194 | 3,72E-11  | 1,00E+00 | 1,00E+00 | Gm23257 | 0,99 | No |
| ENSMUSG00000088948 | 1,92E-01  | 0,526952141  | 6,43E-01  | 4,22E-01 | 7,18E-01 | Gm23262 | 1,14 | No |
| ENSMUSG00000088949 | -1,89E+00 | -3,1076441   | 1,42E+00  | 2,33E-01 | 5,50E-01 | Gm24931 | 0,27 | No |
| ENSMUSG00000088951 | 1,37E+00  | -2,268117124 | 1,93E+00  | 1,65E-01 | 5,17E-01 | Gm24940 | 2,59 | No |
| ENSMUSG00000088955 | -2,71E+00 | -2,963182239 | 2,92E+00  | 8,75E-02 | 3,78E-01 | Gm24944 | 0,15 | No |
| ENSMUSG00000088956 | -3,55E+00 | -2,770552133 | 5,65E+00  | 1,75E-02 | 1,38E-01 | Gm24945 | 0,09 | No |
| ENSMUSG00000088958 | 1,35E+00  | -2,289489835 | 1,87E+00  | 1,72E-01 | 5,28E-01 | Scarna8 | 2,55 | No |
| ENSMUSG00000088961 | -8,71E-01 | -2,711695195 | 4,15E-01  | 5,20E-01 | 7,99E-01 | Gm22089 | 0,55 | No |

|                    |           |              |           |          |          |         |      |    |
|--------------------|-----------|--------------|-----------|----------|----------|---------|------|----|
| ENSMUSG00000088964 | -1,87E+00 | -3,107637761 | 1,39E+00  | 2,38E-01 | 5,50E-01 | Gm22087 | 0,27 | No |
| ENSMUSG00000088969 | 1,27E+00  | -2,770583104 | 9,93E-01  | 3,19E-01 | 6,19E-01 | Gm22085 | 2,40 | No |
| ENSMUSG00000088976 | -2,26E+00 | -2,497580107 | 4,15E+00  | 4,17E-02 | 2,43E-01 | Gm23759 | 0,21 | No |
| ENSMUSG00000088978 | 6,94E-01  | -2,89617475  | 2,61E-01  | 6,09E-01 | 8,51E-01 | Gm23757 | 1,62 | No |
| ENSMUSG00000088982 | 1,92E-01  | -1,126920054 | 1,88E-01  | 6,64E-01 | 8,84E-01 | Gm25600 | 1,14 | No |
| ENSMUSG00000088984 | -1,01E+00 | -2,311153827 | 1,58E+00  | 2,09E-01 | 5,50E-01 | Gm25604 | 0,50 | No |
| ENSMUSG00000088989 | -1,89E+00 | -3,1076441   | 1,42E+00  | 2,33E-01 | 5,50E-01 | Gm25605 | 0,27 | No |
| ENSMUSG00000088990 | -3,88E-01 | -2,033633321 | 3,12E-01  | 5,76E-01 | 8,35E-01 | Gm22767 | 0,76 | No |
| ENSMUSG00000088993 | -1,33E+00 | -1,963152493 | 3,03E+00  | 8,20E-02 | 3,68E-01 | Gm22770 | 0,40 | No |
| ENSMUSG00000089005 | -1,87E+00 | -3,107637761 | 1,39E+00  | 2,38E-01 | 5,50E-01 | Gm23856 | 0,27 | No |
| ENSMUSG00000089009 | 1,87E+00  | -3,107639691 | 1,38E+00  | 2,40E-01 | 5,50E-01 | Gm23858 | 3,67 | No |
| ENSMUSG00000089011 | 9,01E-03  | -3,107646452 | -5,16E-10 | 1,00E+00 | 1,00E+00 | Gm24879 | 1,01 | No |
| ENSMUSG00000089015 | -2,47E-01 | -0,912409174 | 3,35E-01  | 5,62E-01 | 8,25E-01 | Gm24996 | 0,84 | No |
| ENSMUSG00000089026 | 1,06E+00  | -2,268161261 | 1,45E+00  | 2,28E-01 | 5,50E-01 | Gm25014 | 2,09 | No |
| ENSMUSG00000089028 | 9,01E-03  | -3,107646452 | -5,16E-10 | 1,00E+00 | 1,00E+00 | Gm25010 | 1,01 | No |
| ENSMUSG00000089048 | -5,35E-02 | -2,770626705 | 1,94E-03  | 9,65E-01 | 1,00E+00 | Gm26167 | 0,96 | No |
| ENSMUSG00000089049 | 2,57E+00  | -3,0336723   | 2,56E+00  | 1,10E-01 | 4,06E-01 | Gm24358 | 5,96 | No |
| ENSMUSG00000089054 | 1,87E+00  | -3,107639691 | 1,38E+00  | 2,40E-01 | 5,50E-01 | Gm23350 | 3,67 | No |
| ENSMUSG00000089057 | -4,87E-02 | -2,896124877 | 1,54E-03  | 9,69E-01 | 1,00E+00 | Gm23349 | 0,97 | No |
| ENSMUSG00000089072 | -2,86E-01 | -0,929212616 | 5,15E-01  | 4,73E-01 | 7,61E-01 | Gm24500 | 0,82 | No |
| ENSMUSG00000089081 | 1,84E+00  | -3,033632273 | 1,33E+00  | 2,49E-01 | 5,50E-01 | Gm24002 | 3,58 | No |
| ENSMUSG00000089082 | -1,89E+00 | -3,1076441   | 1,42E+00  | 2,33E-01 | 5,50E-01 | Gm24860 | 0,27 | No |
| ENSMUSG00000089083 | 4,06E-01  | -1,614177026 | 5,42E-01  | 4,62E-01 | 7,50E-01 | Rnu7    | 1,33 | No |
| ENSMUSG00000089085 | 2,82E-01  | -2,800996973 | 4,88E-02  | 8,25E-01 | 9,74E-01 | Gm24004 | 1,22 | No |
| ENSMUSG00000089092 | 8,27E-01  | -2,655133744 | 5,95E-01  | 4,40E-01 | 7,33E-01 | Gm25654 | 1,77 | No |
| ENSMUSG00000089093 | 4,16E-01  | -2,448679829 | 1,36E-01  | 7,12E-01 | 9,11E-01 | Snord11 | 1,33 | No |
| ENSMUSG00000089103 | -1,67E-02 | -2,963250293 | 1,29E-04  | 9,91E-01 | 1,00E+00 | Gm23114 | 0,99 | No |
| ENSMUSG00000089105 | -3,33E-01 | -2,497563525 | 1,39E-01  | 7,09E-01 | 9,09E-01 | Gm23115 | 0,79 | No |
| ENSMUSG00000089118 | 3,14E-02  | -3,107617333 | -7,69E-10 | 1,00E+00 | 1,00E+00 | Gm25902 | 1,02 | No |
| ENSMUSG00000089125 | -4,68E-01 | -1,401257398 | 7,62E-01  | 3,83E-01 | 6,84E-01 | Gm26403 | 0,72 | No |
| ENSMUSG00000089129 | 1,02E-02  | 0,221605682  | 1,29E-03  | 9,71E-01 | 1,00E+00 | Gm26407 | 1,01 | No |
| ENSMUSG00000089130 | 1,81E+00  | -3,10765737  | 1,28E+00  | 2,58E-01 | 5,50E-01 | Gm24770 | 3,49 | No |

|                    |           |              |           |          |          |         |      |    |
|--------------------|-----------|--------------|-----------|----------|----------|---------|------|----|
| ENSMUSG00000089133 | 1,23E+00  | -2,896187437 | 9,38E-01  | 3,33E-01 | 6,33E-01 | Gm24771 | 2,35 | No |
| ENSMUSG00000089139 | 1,34E-01  | -1,57419785  | 5,88E-02  | 8,08E-01 | 9,65E-01 | Mir1964 | 1,10 | No |
| ENSMUSG00000089143 | -3,83E-02 | -3,107651936 | -7,91E-11 | 1,00E+00 | 1,00E+00 | Gm25268 | 0,97 | No |
| ENSMUSG00000089145 | 4,44E-01  | -2,770638463 | 1,54E-01  | 6,95E-01 | 9,02E-01 | Gm25265 | 1,36 | No |
| ENSMUSG00000089146 | 1,22E+00  | -2,268188609 | 2,03E+00  | 1,54E-01 | 4,98E-01 | Gm25266 | 2,33 | No |
| ENSMUSG00000089149 | -1,89E+00 | -3,1076441   | 1,42E+00  | 2,33E-01 | 5,50E-01 | Gm22282 | 0,27 | No |
| ENSMUSG00000089151 | 2,63E+00  | -2,770620919 | 2,67E+00  | 1,02E-01 | 3,94E-01 | Mir1950 | 6,19 | No |
| ENSMUSG00000089155 | -1,45E+00 | -1,997952169 | 3,78E+00  | 5,20E-02 | 2,78E-01 | Gm23582 | 0,37 | No |
| ENSMUSG00000089170 | -3,23E+00 | -2,770559602 | 4,39E+00  | 3,60E-02 | 2,25E-01 | Gm22431 | 0,11 | No |
| ENSMUSG00000089179 | -1,92E+00 | -2,832008687 | 1,45E+00  | 2,28E-01 | 5,50E-01 | Gm22428 | 0,27 | No |
| ENSMUSG00000089183 | -3,83E-02 | -3,107651936 | -7,91E-11 | 1,00E+00 | 1,00E+00 | Gm22946 | 0,97 | No |
| ENSMUSG00000089184 | -1,27E+00 | -3,146104694 | 7,49E-01  | 3,87E-01 | 6,87E-01 | Gm22947 | 0,42 | No |
| ENSMUSG00000089185 | 2,16E-01  | -1,497687932 | 1,69E-01  | 6,81E-01 | 8,94E-01 | Gm22940 | 1,16 | No |
| ENSMUSG00000089186 | -2,66E+00 | -2,9632547   | 2,82E+00  | 9,28E-02 | 3,83E-01 | Gm22948 | 0,16 | No |
| ENSMUSG00000089197 | -2,57E-02 | 0,19891423   | 8,42E-03  | 9,27E-01 | 1,00E+00 | Gm25767 | 0,98 | No |
| ENSMUSG00000089199 | 1,41E-01  | 1,586541112  | 6,68E-01  | 4,14E-01 | 7,09E-01 | Gm25772 | 1,10 | No |
| ENSMUSG00000089204 | -1,89E+00 | -3,033648118 | 1,42E+00  | 2,33E-01 | 5,50E-01 | Mir1927 | 0,27 | No |
| ENSMUSG00000089206 | 9,01E-03  | -3,107646452 | -5,16E-10 | 1,00E+00 | 1,00E+00 | Gm26214 | 1,01 | No |
| ENSMUSG00000089208 | 9,01E-03  | -3,107646452 | -5,16E-10 | 1,00E+00 | 1,00E+00 | Gm26216 | 1,01 | No |
| ENSMUSG00000089209 | -1,89E+00 | -3,1076441   | 1,42E+00  | 2,33E-01 | 5,50E-01 | Gm26215 | 0,27 | No |
| ENSMUSG00000089213 | 1,87E+00  | -3,107639691 | 1,38E+00  | 2,40E-01 | 5,50E-01 | Gm23388 | 3,67 | No |
| ENSMUSG00000089214 | 1,26E+00  | -2,711740848 | 9,91E-01  | 3,20E-01 | 6,20E-01 | Mir1931 | 2,40 | No |
| ENSMUSG00000089219 | 1,22E+00  | -3,146114919 | 6,90E-01  | 4,06E-01 | 7,02E-01 | Mir1963 | 2,33 | No |
| ENSMUSG00000089224 | 7,45E-01  | -2,832031801 | 3,02E-01  | 5,83E-01 | 8,38E-01 | Gm22075 | 1,68 | No |
| ENSMUSG00000089229 | 7,55E-01  | -2,051857551 | 1,02E+00  | 3,13E-01 | 6,13E-01 | Gm25043 | 1,69 | No |
| ENSMUSG00000089233 | -1,87E+00 | -3,107637761 | 1,39E+00  | 2,38E-01 | 5,50E-01 | Gm22202 | 0,27 | No |
| ENSMUSG00000089235 | 4,51E-01  | -2,770585012 | 1,59E-01  | 6,90E-01 | 8,99E-01 | Gm23119 | 1,37 | No |
| ENSMUSG00000089237 | 1,85E+00  | -3,107657832 | 1,35E+00  | 2,46E-01 | 5,50E-01 | Gm22206 | 3,61 | No |
| ENSMUSG00000089239 | -4,36E-02 | -2,711641832 | 9,21E-04  | 9,76E-01 | 1,00E+00 | Gm22200 | 0,97 | No |
| ENSMUSG00000089245 | 3,67E-02  | -2,963207527 | 2,07E-11  | 1,00E+00 | 1,00E+00 | Gm24053 | 1,03 | No |
| ENSMUSG00000089248 | 1,81E+00  | -3,10765737  | 1,28E+00  | 2,58E-01 | 5,50E-01 | Gm24050 | 3,49 | No |
| ENSMUSG00000089250 | 2,59E+00  | -2,963287563 | 2,60E+00  | 1,07E-01 | 3,99E-01 | Gm25713 | 6,03 | No |



|                    |           |              |           |          |          |         |      |    |
|--------------------|-----------|--------------|-----------|----------|----------|---------|------|----|
| ENSMUSG00000089253 | -1,86E+00 | -3,033612668 | 1,39E+00  | 2,38E-01 | 5,50E-01 | Gm25716 | 0,28 | No |
| ENSMUSG00000089255 | -8,02E-01 | -1,896096478 | 1,53E+00  | 2,17E-01 | 5,50E-01 | Snora78 | 0,57 | No |
| ENSMUSG00000089260 | 1,94E+00  | -2,448643568 | 4,57E+00  | 3,26E-02 | 2,11E-01 | Mir1929 | 3,84 | No |
| ENSMUSG00000089261 | 1,33E-02  | -1,226235191 | 6,41E-04  | 9,80E-01 | 1,00E+00 | Mir669n | 1,01 | No |
| ENSMUSG00000089265 | 5,20E-01  | -1,963315022 | 6,81E-01  | 4,09E-01 | 7,06E-01 | Gm22888 | 1,43 | No |
| ENSMUSG00000089267 | -3,22E+00 | -2,711694487 | 4,36E+00  | 3,67E-02 | 2,28E-01 | Gm22890 | 0,11 | No |
| ENSMUSG00000089269 | 3,14E-02  | -3,107617333 | -7,69E-10 | 1,00E+00 | 1,00E+00 | Gm26468 | 1,02 | No |
| ENSMUSG00000089281 | -1,10E-01 | -0,15581844  | 1,13E-01  | 7,37E-01 | 9,25E-01 | Scarna6 | 0,93 | No |
| ENSMUSG00000089290 | 3,14E-02  | -3,107617333 | -7,69E-10 | 1,00E+00 | 1,00E+00 | Gm23207 | 1,02 | No |
| ENSMUSG00000089291 | -3,83E-02 | -3,107651936 | -7,91E-11 | 1,00E+00 | 1,00E+00 | Gm23208 | 0,97 | No |
| ENSMUSG00000089296 | 2,73E-02  | -1,333239821 | 2,36E-03  | 9,61E-01 | 1,00E+00 | Gm23205 | 1,02 | No |
| ENSMUSG00000089298 | -5,35E-01 | -2,600622606 | 2,25E-01  | 6,36E-01 | 8,67E-01 | Gm24636 | 0,69 | No |
| ENSMUSG00000089299 | 9,01E-03  | -3,107646452 | -5,16E-10 | 1,00E+00 | 1,00E+00 | Gm24637 | 1,01 | No |
| ENSMUSG00000089308 | -7,24E-02 | -2,378304645 | 5,99E-03  | 9,38E-01 | 1,00E+00 | Gm24837 | 0,95 | No |
| ENSMUSG00000089313 | 1,89E+00  | -2,96320077  | 1,38E+00  | 2,40E-01 | 5,50E-01 | Gm23182 | 3,71 | No |
| ENSMUSG00000089324 | -1,89E+00 | -3,1076441   | 1,42E+00  | 2,33E-01 | 5,50E-01 | Mir1936 | 0,27 | No |
| ENSMUSG00000089336 | -5,52E-01 | -2,033580196 | 4,88E-01  | 4,85E-01 | 7,72E-01 | Gm24347 | 0,68 | No |
| ENSMUSG00000089337 | -4,17E-01 | -1,998002293 | 3,62E-01  | 5,48E-01 | 8,15E-01 | Gm24346 | 0,75 | No |
| ENSMUSG00000089343 | -3,53E+00 | -2,896127731 | 5,59E+00  | 1,81E-02 | 1,41E-01 | Gm22667 | 0,09 | No |
| ENSMUSG00000089346 | 1,85E+00  | -3,107657832 | 1,35E+00  | 2,46E-01 | 5,50E-01 | Gm22663 | 3,61 | No |
| ENSMUSG00000089353 | -2,65E+00 | -2,963248364 | 2,80E+00  | 9,42E-02 | 3,84E-01 | Gm25488 | 0,16 | No |
| ENSMUSG00000089365 | -5,08E-01 | -0,344193876 | 2,37E+00  | 1,24E-01 | 4,40E-01 | Gm23823 | 0,70 | No |
| ENSMUSG00000089371 | 2,19E-02  | -1,021562081 | 2,41E-03  | 9,61E-01 | 1,00E+00 | Mir1938 | 1,02 | No |
| ENSMUSG00000089381 | -1,87E+00 | -3,107637761 | 1,39E+00  | 2,38E-01 | 5,50E-01 | Gm24678 | 0,27 | No |
| ENSMUSG00000089389 | -3,53E-01 | -1,816219698 | 3,04E-01  | 5,82E-01 | 8,38E-01 | Gm24682 | 0,78 | No |
| ENSMUSG00000089392 | -1,89E+00 | -3,1076441   | 1,42E+00  | 2,33E-01 | 5,50E-01 | Gm23023 | 0,27 | No |
| ENSMUSG00000089396 | -7,61E-02 | -2,963237265 | 2,63E-03  | 9,59E-01 | 1,00E+00 | Gm23027 | 0,95 | No |
| ENSMUSG00000089404 | -3,83E-02 | -3,107651936 | -7,91E-11 | 1,00E+00 | 1,00E+00 | Gm24877 | 0,97 | No |
| ENSMUSG00000089405 | -1,15E+00 | -1,896059374 | 2,17E+00  | 1,40E-01 | 4,73E-01 | Gm24876 | 0,45 | No |
| ENSMUSG00000089407 | 2,61E+00  | -3,033672762 | 2,63E+00  | 1,05E-01 | 3,97E-01 | Gm24878 | 6,10 | No |
| ENSMUSG00000089417 | -1,68E+00 | -1,655086436 | 4,29E+00  | 3,83E-02 | 2,32E-01 | Gm22009 | 0,31 | No |
| ENSMUSG00000089420 | 1,81E+00  | -3,10765737  | 1,28E+00  | 2,58E-01 | 5,50E-01 | Gm27934 | 3,49 | No |

|                    |           |              |           |          |          |          |       |    |
|--------------------|-----------|--------------|-----------|----------|----------|----------|-------|----|
| ENSMUSG00000089424 | 3,68E+00  | -2,800996636 | 6,08E+00  | 1,36E-02 | 1,17E-01 | Mir1930  | 12,85 | No |
| ENSMUSG00000089429 | 4,57E-01  | -2,522709478 | 2,23E-01  | 6,37E-01 | 8,68E-01 | Gm26004  | 1,37  | No |
| ENSMUSG00000089432 | 6,69E-01  | -1,165817173 | 2,28E+00  | 1,31E-01 | 4,56E-01 | Mir1966  | 1,59  | No |
| ENSMUSG00000089447 | -3,20E+00 | -2,963227503 | 4,31E+00  | 3,79E-02 | 2,31E-01 | Gm22532  | 0,11  | No |
| ENSMUSG00000089453 | 4,01E+00  | -2,600736372 | 7,84E+00  | 5,10E-03 | 5,67E-02 | Gm24224  | 16,15 | No |
| ENSMUSG00000089475 | -1,00E+00 | -2,268120759 | 1,55E+00  | 2,14E-01 | 5,50E-01 | Gm25363  | 0,50  | No |
| ENSMUSG00000089476 | -5,89E-01 | -1,548029982 | 1,16E+00  | 2,81E-01 | 5,78E-01 | Gm25364  | 0,66  | No |
| ENSMUSG00000089486 | 1,81E+00  | -3,10765737  | 1,28E+00  | 2,58E-01 | 5,50E-01 | Gm24737  | 3,49  | No |
| ENSMUSG00000089491 | -3,29E-01 | -2,448676793 | 1,62E-01  | 6,87E-01 | 8,98E-01 | Gm26363  | 0,80  | No |
| ENSMUSG00000089493 | -2,66E+00 | -3,033639428 | 2,81E+00  | 9,35E-02 | 3,83E-01 | Gm26361  | 0,16  | No |
| ENSMUSG00000089498 | 3,83E-01  | -0,126876762 | 1,31E+00  | 2,53E-01 | 5,50E-01 | Gm26359  | 1,30  | No |
| ENSMUSG00000089499 | 1,87E+00  | -3,107639691 | 1,38E+00  | 2,40E-01 | 5,50E-01 | Gm25643  | 3,67  | No |
| ENSMUSG00000089501 | -3,24E+00 | -2,896104886 | 4,43E+00  | 3,53E-02 | 2,22E-01 | Gm23479  | 0,11  | No |
| ENSMUSG00000089504 | -3,63E-01 | -2,3110792   | 1,66E-01  | 6,83E-01 | 8,95E-01 | Gm23475  | 0,78  | No |
| ENSMUSG00000089512 | -8,16E-01 | -2,033627542 | 1,28E+00  | 2,59E-01 | 5,51E-01 | Gm26287  | 0,57  | No |
| ENSMUSG00000089513 | 5,72E-01  | -1,247170417 | 1,23E+00  | 2,67E-01 | 5,64E-01 | Gm24875  | 1,49  | No |
| ENSMUSG00000089525 | 7,90E-02  | -1,770662959 | 1,67E-02  | 8,97E-01 | 1,00E+00 | Gm23833  | 1,06  | No |
| ENSMUSG00000089530 | 1,85E+00  | -3,107657832 | 1,35E+00  | 2,46E-01 | 5,50E-01 | Gm25163  | 3,61  | No |
| ENSMUSG00000089536 | -1,21E-01 | -1,522719523 | 5,36E-02  | 8,17E-01 | 9,70E-01 | Scarna3a | 0,92  | No |
| ENSMUSG00000089542 | -4,31E-02 | 2,195461165  | 9,44E-02  | 7,59E-01 | 9,36E-01 | Gm25835  | 0,97  | No |
| ENSMUSG00000089544 | -8,90E-02 | -2,998006477 | 3,76E-03  | 9,51E-01 | 1,00E+00 | Gm25837  | 0,94  | No |
| ENSMUSG00000089545 | 1,84E+00  | -3,033632273 | 1,33E+00  | 2,49E-01 | 5,50E-01 | Gm25838  | 3,58  | No |
| ENSMUSG00000089549 | -2,68E+00 | -3,033645766 | 2,84E+00  | 9,17E-02 | 3,82E-01 | Gm25831  | 0,16  | No |
| ENSMUSG00000089555 | -1,89E+00 | -3,1076441   | 1,42E+00  | 2,33E-01 | 5,50E-01 | Mir1933  | 0,27  | No |
| ENSMUSG00000089571 | -2,99E-01 | -2,28947487  | 1,45E-01  | 7,04E-01 | 9,06E-01 | Gm23008  | 0,81  | No |
| ENSMUSG00000089581 | -1,24E+00 | -2,600624748 | 1,48E+00  | 2,24E-01 | 5,50E-01 | Gm23341  | 0,42  | No |
| ENSMUSG00000089586 | -2,63E-02 | -3,033653157 | 2,33E-04  | 9,88E-01 | 1,00E+00 | Gm25348  | 0,98  | No |
| ENSMUSG00000089590 | -1,98E-02 | -3,033655952 | 2,83E-11  | 1,00E+00 | 1,00E+00 | Gm26160  | 0,99  | No |
| ENSMUSG00000089596 | -2,23E-02 | -3,070175391 | 1,85E-04  | 9,89E-01 | 1,00E+00 | Nron     | 0,98  | No |
| ENSMUSG00000089598 | -3,26E-01 | -2,165669805 | 1,59E-01  | 6,90E-01 | 8,99E-01 | Gm26158  | 0,80  | No |
| ENSMUSG00000089599 | 4,24E-02  | -3,033592245 | -1,17E-09 | 1,00E+00 | 1,00E+00 | Gm26157  | 1,03  | No |
| ENSMUSG00000089613 | 1,86E+00  | -2,963277112 | 1,35E+00  | 2,46E-01 | 5,50E-01 | Gm23504  | 3,62  | No |

|                    |           |              |          |          |          |               |      |     |
|--------------------|-----------|--------------|----------|----------|----------|---------------|------|-----|
| ENSMUSG00000089617 | -1,55E-01 | -2,70192222  | 1,50E-02 | 9,03E-01 | 1,00E+00 | Scarna10      | 0,90 | No  |
| ENSMUSG00000089621 | 6,94E-01  | -2,963285211 | 2,59E-01 | 6,11E-01 | 8,52E-01 | Gm25445       | 1,62 | No  |
| ENSMUSG00000089622 | -2,03E+00 | -2,355565908 | 3,13E+00 | 7,69E-02 | 3,54E-01 | Gm25447       | 0,24 | No  |
| ENSMUSG00000089628 | 9,19E-02  | 4,143348015  | 1,14E+00 | 2,86E-01 | 5,82E-01 | Gm9727        | 1,07 | No  |
| ENSMUSG00000089630 | 2,96E-02  | -1,497545333 | 2,97E-03 | 9,57E-01 | 1,00E+00 | Gm6903        | 1,02 | No  |
| ENSMUSG00000089631 | 4,26E-01  | -2,378288324 | 2,69E-01 | 6,04E-01 | 8,49E-01 | Gm16326       | 1,34 | No  |
| ENSMUSG00000089633 | 1,87E+00  | -3,107639691 | 1,38E+00 | 2,40E-01 | 5,50E-01 | A230009B12Rik | 3,67 | No  |
| ENSMUSG00000089634 | -9,37E-01 | -2,7116555   | 7,69E-01 | 3,80E-01 | 6,81E-01 | Nat8b-ps      | 0,52 | No  |
| ENSMUSG00000089635 | -1,24E+00 | -3,107618288 | 7,21E-01 | 3,96E-01 | 6,96E-01 | Gm16559       | 0,42 | No  |
| ENSMUSG00000089636 | 8,42E-02  | 1,635946436  | 2,55E-01 | 6,13E-01 | 8,53E-01 | 1700058P15Rik | 1,06 | No  |
| ENSMUSG00000089639 | -5,22E-01 | -1,655188622 | 8,16E-01 | 3,66E-01 | 6,67E-01 | Gm2862        | 0,70 | No  |
| ENSMUSG00000089640 | 1,99E-02  | 4,595411173  | 6,20E-02 | 8,03E-01 | 9,62E-01 | Gm6397        | 1,01 | No  |
| ENSMUSG00000089643 | 3,09E-01  | -2,600688284 | 9,74E-02 | 7,55E-01 | 9,34E-01 | Gm16301       | 1,24 | No  |
| ENSMUSG00000089645 | 6,88E-01  | -1,963299627 | 1,12E+00 | 2,90E-01 | 5,86E-01 | Gm5766        | 1,61 | No  |
| ENSMUSG00000089646 | -2,99E+00 | -2,355508887 | 9,08E+00 | 2,58E-03 | 3,41E-02 | Gm15796       | 0,13 | Yes |
| ENSMUSG00000089647 | 2,96E-02  | 3,870069454  | 1,05E-01 | 7,46E-01 | 9,29E-01 | Gm2245        | 1,02 | No  |
| ENSMUSG00000089648 | 1,16E-01  | 3,511984479  | 1,40E+00 | 2,37E-01 | 5,50E-01 | Gm15790       | 1,08 | No  |
| ENSMUSG00000089651 | -1,37E-01 | -1,16558577  | 8,53E-02 | 7,70E-01 | 9,42E-01 | Gm16353       | 0,91 | No  |
| ENSMUSG00000089652 | -2,24E-01 | -2,448667879 | 6,03E-02 | 8,06E-01 | 9,64E-01 | Gm16025       | 0,86 | No  |
| ENSMUSG00000089654 | 1,89E+00  | -3,033614598 | 1,38E+00 | 2,40E-01 | 5,50E-01 | Ear-ps12      | 3,70 | No  |
| ENSMUSG00000089657 | -5,80E-01 | -2,378183077 | 3,60E-01 | 5,48E-01 | 8,15E-01 | Gm16585       | 0,67 | No  |
| ENSMUSG00000089659 | -1,11E+00 | -1,165640731 | 5,33E+00 | 2,09E-02 | 1,56E-01 | Gm3470        | 0,46 | No  |
| ENSMUSG00000089661 | -8,26E-01 | -2,574206669 | 6,81E-01 | 4,09E-01 | 7,06E-01 | Mia           | 0,56 | No  |
| ENSMUSG00000089662 | 3,24E-01  | -0,418800959 | 7,79E-01 | 3,78E-01 | 6,78E-01 | Gm14057       | 1,25 | No  |
| ENSMUSG00000089663 | -7,34E-02 | -2,683148555 | 4,28E-03 | 9,48E-01 | 1,00E+00 | Gm15651       | 0,95 | No  |
| ENSMUSG00000089665 | -1,41E-01 | 1,913501436  | 8,68E-01 | 3,52E-01 | 6,53E-01 | Fcor          | 0,91 | No  |
| ENSMUSG00000089669 | 1,55E-01  | 4,567303121  | 3,75E+00 | 5,27E-02 | 2,80E-01 | Tnfsf13       | 1,11 | No  |
| ENSMUSG00000089670 | -1,85E-01 | 4,216691887  | 4,79E+00 | 2,86E-02 | 1,92E-01 | Gm16581       | 0,88 | No  |
| ENSMUSG00000089671 | -6,47E-02 | -1,800995754 | 1,02E-02 | 9,19E-01 | 1,00E+00 | Gm16537       | 0,96 | No  |
| ENSMUSG00000089673 | 1,86E+00  | -3,033661846 | 1,35E+00 | 2,46E-01 | 5,50E-01 | Gm16546       | 3,62 | No  |
| ENSMUSG00000089675 | -2,25E-01 | 2,828466195  | 3,60E+00 | 5,77E-02 | 2,96E-01 | Ugt1a8        | 0,86 | No  |
| ENSMUSG00000089678 | 7,28E-01  | -2,831991672 | 2,89E-01 | 5,91E-01 | 8,41E-01 | Agxt2         | 1,66 | No  |

|                    |           |              |           |          |          |               |      |     |
|--------------------|-----------|--------------|-----------|----------|----------|---------------|------|-----|
| ENSMUSG00000089679 | -2,08E-01 | -1,006999384 | 2,41E-01  | 6,23E-01 | 8,58E-01 | Gm16299       | 0,87 | No  |
| ENSMUSG00000089680 | -6,90E-01 | -1,574161496 | 1,36E+00  | 2,43E-01 | 5,50E-01 | Gm15722       | 0,62 | No  |
| ENSMUSG00000089682 | -1,93E-01 | 5,091114602  | 7,10E+00  | 7,72E-03 | 7,70E-02 | Bcl2l2        | 0,87 | No  |
| ENSMUSG00000089683 | 4,37E-02  | -0,49745882  | 1,43E-02  | 9,05E-01 | 1,00E+00 | 4930570N18Rik | 1,03 | No  |
| ENSMUSG00000089684 | -8,26E-01 | -0,683051226 | 4,32E+00  | 3,76E-02 | 2,31E-01 | Gm14163       | 0,56 | No  |
| ENSMUSG00000089686 | -2,64E-01 | -0,574174953 | 5,01E-01  | 4,79E-01 | 7,66E-01 | Mnd1-ps       | 0,83 | No  |
| ENSMUSG00000089687 | -5,01E-02 | -1,60067845  | 6,47E-03  | 9,36E-01 | 1,00E+00 | Rab42         | 0,97 | No  |
| ENSMUSG00000089695 | 5,84E-02  | 3,767210706  | 3,88E-01  | 5,33E-01 | 8,06E-01 | Gm15946       | 1,04 | No  |
| ENSMUSG00000089698 | -1,48E-01 | 3,947644265  | 2,74E+00  | 9,78E-02 | 3,90E-01 | Gm2541        | 0,90 | No  |
| ENSMUSG00000089701 | -1,75E-01 | -1,929317886 | 5,88E-02  | 8,08E-01 | 9,65E-01 | Gm15978       | 0,89 | No  |
| ENSMUSG00000089702 | 4,04E-02  | 2,631203635  | 1,03E-01  | 7,49E-01 | 9,30E-01 | Gm16568       | 1,03 | No  |
| ENSMUSG00000089704 | -2,46E-02 | 4,829563334  | 1,04E-01  | 7,47E-01 | 9,30E-01 | Galnt2        | 0,98 | No  |
| ENSMUSG00000089706 | 1,81E-01  | 0,199224367  | 4,11E-01  | 5,22E-01 | 8,00E-01 | B230216N24Rik | 1,13 | No  |
| ENSMUSG00000089707 | 9,66E-01  | -2,401410278 | 1,01E+00  | 3,16E-01 | 6,16E-01 | Slain1os      | 1,95 | No  |
| ENSMUSG00000089708 | 1,82E+00  | -3,033661385 | 1,31E+00  | 2,52E-01 | 5,50E-01 | 5330439A09Rik | 3,54 | No  |
| ENSMUSG00000089709 | -5,23E-02 | -2,770623995 | 2,42E-03  | 9,61E-01 | 1,00E+00 | Gm16262       | 0,96 | No  |
| ENSMUSG00000089711 | 2,25E-01  | -0,48522995  | 4,42E-01  | 5,06E-01 | 7,90E-01 | Gm16240       | 1,17 | No  |
| ENSMUSG00000089712 | -1,03E+00 | -1,879835605 | 2,18E+00  | 1,40E-01 | 4,72E-01 | Gm15889       | 0,49 | No  |
| ENSMUSG00000089713 | -3,94E-01 | -2,800955543 | 9,56E-02  | 7,57E-01 | 9,35E-01 | Gm16564       | 0,76 | No  |
| ENSMUSG00000089714 | -1,03E+00 | -1,198888826 | 4,39E+00  | 3,61E-02 | 2,25E-01 | Gm16092       | 0,49 | No  |
| ENSMUSG00000089715 | -6,44E-02 | 2,064031304  | 1,77E-01  | 6,74E-01 | 8,90E-01 | Cbx6          | 0,96 | No  |
| ENSMUSG00000089716 | -9,83E-01 | -0,645849318 | 5,22E+00  | 2,23E-02 | 1,62E-01 | Gm6264        | 0,51 | No  |
| ENSMUSG00000089719 | -1,88E+00 | -2,963263387 | 1,42E+00  | 2,33E-01 | 5,50E-01 | Gm15758       | 0,27 | No  |
| ENSMUSG00000089722 | 7,95E-01  | 1,889865209  | 2,46E+01  | 6,98E-07 | 3,22E-05 | Cd300ld5      | 1,74 | Yes |
| ENSMUSG00000089726 | 7,04E-02  | 2,632255202  | 3,26E-01  | 5,68E-01 | 8,30E-01 | Mir17hg       | 1,05 | No  |
| ENSMUSG00000089728 | 1,73E-02  | -0,509785242 | 2,36E-03  | 9,61E-01 | 1,00E+00 | Clec2f        | 1,01 | No  |
| ENSMUSG00000089729 | -2,99E+00 | -2,997982539 | 3,65E+00  | 5,60E-02 | 2,90E-01 | Gm16552       | 0,13 | No  |
| ENSMUSG00000089733 | -4,81E-02 | -1,963157916 | 4,31E-03  | 9,48E-01 | 1,00E+00 | Gm15628       | 0,97 | No  |
| ENSMUSG00000089735 | -2,63E-01 | 0,259029006  | 9,63E-01  | 3,26E-01 | 6,27E-01 | Gm8428        | 0,83 | No  |
| ENSMUSG00000089736 | 3,94E-02  | 2,050802529  | 6,86E-02  | 7,93E-01 | 9,56E-01 | Tgfbr3l       | 1,03 | No  |
| ENSMUSG00000089737 | 3,14E-02  | -3,107617333 | -7,69E-10 | 1,00E+00 | 1,00E+00 | Gm15688       | 1,02 | No  |
| ENSMUSG00000089739 | -2,98E-02 | 6,017851636  | 2,08E-01  | 6,48E-01 | 8,75E-01 | Gm20431       | 0,98 | No  |

|                    |           |              |          |          |          |               |      |     |
|--------------------|-----------|--------------|----------|----------|----------|---------------|------|-----|
| ENSMUSG00000089742 | -8,16E-01 | 0,251985093  | 8,88E+00 | 2,89E-03 | 3,72E-02 | Gm15898       | 0,57 | Yes |
| ENSMUSG00000089744 | 4,15E-01  | -1,548153657 | 5,16E-01 | 4,73E-01 | 7,60E-01 | Gm16146       | 1,33 | No  |
| ENSMUSG00000089745 | 8,00E-02  | 0,089839093  | 8,06E-02 | 7,76E-01 | 9,46E-01 | 1810008B01Rik | 1,06 | No  |
| ENSMUSG00000089746 | -8,51E-02 | -2,448779009 | 8,30E-03 | 9,27E-01 | 1,00E+00 | Gm3513        | 0,94 | No  |
| ENSMUSG00000089748 | 3,39E-02  | 1,501899233  | 3,67E-02 | 8,48E-01 | 9,88E-01 | Matr3-ps2     | 1,02 | No  |
| ENSMUSG00000089753 | 1,08E+00  | -0,863730483 | 6,32E+00 | 1,19E-02 | 1,06E-01 | Cd300ld2      | 2,11 | No  |
| ENSMUSG00000089754 | -1,94E+00 | -3,107619243 | 1,50E+00 | 2,21E-01 | 5,50E-01 | Ear-ps7       | 0,26 | No  |
| ENSMUSG00000089755 | 3,27E-01  | -2,070210538 | 1,97E-01 | 6,57E-01 | 8,80E-01 | 0610012D04Rik | 1,25 | No  |
| ENSMUSG00000089756 | -1,93E-01 | 1,273802924  | 1,10E+00 | 2,94E-01 | 5,90E-01 | Zfp966        | 0,87 | No  |
| ENSMUSG00000089757 | 8,81E-01  | -1,847728867 | 1,97E+00 | 1,61E-01 | 5,09E-01 | Gm16334       | 1,84 | No  |
| ENSMUSG00000089762 | 5,85E-01  | 1,970280233  | 1,46E+01 | 1,34E-04 | 3,10E-03 | Ier5l         | 1,50 | Yes |
| ENSMUSG00000089764 | -8,06E-02 | 8,281744446  | 1,95E+00 | 1,63E-01 | 5,13E-01 | Gm16580       | 0,95 | No  |
| ENSMUSG00000089766 | -3,85E-01 | 0,345060791  | 2,21E+00 | 1,38E-01 | 4,68E-01 | Gm16538       | 0,77 | No  |
| ENSMUSG00000089769 | 9,50E-02  | -0,711771955 | 6,08E-02 | 8,05E-01 | 9,63E-01 | Gm16574       | 1,07 | No  |
| ENSMUSG00000089774 | -1,33E-01 | 3,713061358  | 2,05E+00 | 1,52E-01 | 4,94E-01 | Slc5a3        | 0,91 | No  |
| ENSMUSG00000089776 | -7,88E-02 | -2,89616692  | 4,36E-03 | 9,47E-01 | 1,00E+00 | Gm15684       | 0,95 | No  |
| ENSMUSG00000089779 | -1,88E+00 | -3,10764093  | 1,41E+00 | 2,35E-01 | 5,50E-01 | Gm15641       | 0,27 | No  |
| ENSMUSG00000089780 | 2,56E-01  | -2,929311451 | 3,96E-02 | 8,42E-01 | 9,85E-01 | Gm16306       | 1,19 | No  |
| ENSMUSG00000089781 | 5,48E-02  | -0,887930904 | 1,65E-02 | 8,98E-01 | 1,00E+00 | Gm15756       | 1,04 | No  |
| ENSMUSG00000089782 | -9,57E-02 | 7,956572824  | 2,69E+00 | 1,01E-01 | 3,92E-01 | Gm3531        | 0,94 | No  |
| ENSMUSG00000089785 | 3,65E-01  | 0,731955359  | 2,58E+00 | 1,08E-01 | 4,03E-01 | Slc25a5-ps    | 1,29 | No  |
| ENSMUSG00000089789 | 8,19E-01  | -2,448737896 | 8,04E-01 | 3,70E-01 | 6,71E-01 | Rdh1          | 1,76 | No  |
| ENSMUSG00000089791 | -1,88E-01 | 3,315147668  | 3,27E+00 | 7,05E-02 | 3,36E-01 | Gm3555        | 0,88 | No  |
| ENSMUSG00000089794 | -7,35E-02 | -2,770561087 | 3,66E-03 | 9,52E-01 | 1,00E+00 | Gm16337       | 0,95 | No  |
| ENSMUSG00000089796 | 2,94E-01  | 2,184455391  | 4,15E+00 | 4,17E-02 | 2,43E-01 | Gm16575       | 1,23 | No  |
| ENSMUSG00000089798 | 4,13E-01  | -0,122038057 | 1,86E+00 | 1,73E-01 | 5,30E-01 | 1700028K03Rik | 1,33 | No  |
| ENSMUSG00000089800 | -2,66E+00 | -3,033639428 | 2,81E+00 | 9,35E-02 | 3,83E-01 | Rps19-ps10    | 0,16 | No  |
| ENSMUSG00000089803 | -5,94E-02 | 4,636196064  | 5,69E-01 | 4,51E-01 | 7,41E-01 | Gm10171       | 0,96 | No  |
| ENSMUSG00000089806 | 1,64E-01  | -1,485094556 | 8,80E-02 | 7,67E-01 | 9,40E-01 | Gm16570       | 1,12 | No  |
| ENSMUSG00000089808 | -2,93E-01 | 1,066596111  | 2,11E+00 | 1,46E-01 | 4,84E-01 | Gm7241        | 0,82 | No  |
| ENSMUSG00000089809 | -9,67E-02 | 6,170685514  | 2,16E+00 | 1,41E-01 | 4,75E-01 | Rasgef1b      | 0,94 | No  |
| ENSMUSG00000089810 | -8,20E-02 | 2,646638434  | 4,46E-01 | 5,04E-01 | 7,89E-01 | Gm16536       | 0,94 | No  |

|                    |           |              |          |          |          |               |       |     |
|--------------------|-----------|--------------|----------|----------|----------|---------------|-------|-----|
| ENSMUSG00000089814 | -1,25E+00 | -3,070175612 | 7,24E-01 | 3,95E-01 | 6,95E-01 | Gm15310       | 0,42  | No  |
| ENSMUSG00000089815 | 1,87E+00  | -3,107639691 | 1,38E+00 | 2,40E-01 | 5,50E-01 | Gm5083        | 3,67  | No  |
| ENSMUSG00000089816 | 3,15E+00  | -2,770626808 | 4,04E+00 | 4,44E-02 | 2,51E-01 | Ear-ps8       | 8,86  | No  |
| ENSMUSG00000089817 | 1,66E-01  | 1,302357385  | 8,28E-01 | 3,63E-01 | 6,64E-01 | Gm7162        | 1,12  | No  |
| ENSMUSG00000089818 | -1,26E+00 | -1,800948173 | 3,78E+00 | 5,20E-02 | 2,78E-01 | Gm15950       | 0,42  | No  |
| ENSMUSG00000089820 | 3,73E-01  | -0,885247975 | 8,64E-01 | 3,53E-01 | 6,54E-01 | Gm15775       | 1,29  | No  |
| ENSMUSG00000089822 | -4,85E-02 | -2,655161929 | 2,61E-03 | 9,59E-01 | 1,00E+00 | Gm15759       | 0,97  | No  |
| ENSMUSG00000089824 | 9,92E-02  | 4,605524279  | 1,61E+00 | 2,04E-01 | 5,50E-01 | Rbm12         | 1,07  | No  |
| ENSMUSG00000089827 | -5,31E-01 | -0,226087055 | 2,69E+00 | 1,01E-01 | 3,93E-01 | 1700023H06Rik | 0,69  | No  |
| ENSMUSG00000089828 | -1,14E-02 | -3,033635021 | 1,50E-05 | 9,97E-01 | 1,00E+00 | Gm16300       | 0,99  | No  |
| ENSMUSG00000089829 | 1,55E-01  | -0,436830493 | 2,23E-01 | 6,37E-01 | 8,68E-01 | Gm16565       | 1,11  | No  |
| ENSMUSG00000089830 | 7,90E-02  | -2,472944881 | 8,26E-03 | 9,28E-01 | 1,00E+00 | Gm15749       | 1,06  | No  |
| ENSMUSG00000089832 | 3,21E-02  | 5,383698521  | 2,08E-01 | 6,48E-01 | 8,75E-01 | Shkbp1        | 1,02  | No  |
| ENSMUSG00000089835 | -2,54E+00 | -2,683114652 | 3,91E+00 | 4,81E-02 | 2,64E-01 | Gm7097        | 0,17  | No  |
| ENSMUSG00000089837 | 3,45E-01  | -0,257625432 | 1,11E+00 | 2,92E-01 | 5,88E-01 | Npcd          | 1,27  | No  |
| ENSMUSG00000089838 | -2,96E-01 | 5,101650062  | 1,65E+01 | 4,88E-05 | 1,34E-03 | Gm2962        | 0,81  | Yes |
| ENSMUSG00000089839 | 3,49E+00  | -2,832044175 | 5,28E+00 | 2,16E-02 | 1,58E-01 | Rps19-ps11    | 11,22 | No  |
| ENSMUSG00000089842 | -5,25E-02 | -3,033661434 | 4,08E-11 | 1,00E+00 | 1,00E+00 | Pitpnm2os2    | 0,96  | No  |
| ENSMUSG00000089844 | -4,44E-01 | 1,264951968  | 5,68E+00 | 1,72E-02 | 1,37E-01 | A530032D15Rik | 0,74  | No  |
| ENSMUSG00000089847 | 1,04E-01  | 3,975092642  | 1,35E+00 | 2,45E-01 | 5,50E-01 | Timm10b       | 1,07  | No  |
| ENSMUSG00000089849 | 1,87E-01  | -1,929288073 | 5,22E-02 | 8,19E-01 | 9,71E-01 | Runx2os2      | 1,14  | No  |
| ENSMUSG00000089853 | 7,25E-02  | -1,35554305  | 1,99E-02 | 8,88E-01 | 1,00E+00 | Gm15853       | 1,05  | No  |
| ENSMUSG00000089854 | 3,10E-01  | -0,006987601 | 1,05E+00 | 3,05E-01 | 6,02E-01 | Gm16133       | 1,24  | No  |
| ENSMUSG00000089857 | 7,06E-02  | -0,14624393  | 5,37E-02 | 8,17E-01 | 9,69E-01 | Zfp882        | 1,05  | No  |
| ENSMUSG00000089859 | -2,66E+00 | -3,033639428 | 2,81E+00 | 9,35E-02 | 3,83E-01 | Gm13769       | 0,16  | No  |
| ENSMUSG00000089861 | -2,66E+00 | -2,9632547   | 2,82E+00 | 9,28E-02 | 3,83E-01 | Gm16139       | 0,16  | No  |
| ENSMUSG00000089862 | 3,06E-02  | 3,831303027  | 1,11E-01 | 7,39E-01 | 9,26E-01 | Umad1         | 1,02  | No  |
| ENSMUSG00000089865 | -3,15E-02 | 4,984832492  | 1,81E-01 | 6,70E-01 | 8,88E-01 | Gm44503       | 0,98  | No  |
| ENSMUSG00000089871 | -5,88E-02 | -3,033652696 | 1,62E-03 | 9,68E-01 | 1,00E+00 | Speer4cos     | 0,96  | No  |
| ENSMUSG00000089872 | 8,06E-02  | 5,780787367  | 1,46E+00 | 2,27E-01 | 5,50E-01 | Rps6kc1       | 1,06  | No  |
| ENSMUSG00000089874 | 3,50E+00  | -2,711789862 | 5,31E+00 | 2,12E-02 | 1,57E-01 | 9230117E06Rik | 11,30 | No  |
| ENSMUSG00000089875 | 3,62E-02  | 3,833833008  | 1,53E-01 | 6,95E-01 | 9,02E-01 | Etohd2        | 1,03  | No  |

|                    |           |              |           |          |          |               |      |     |
|--------------------|-----------|--------------|-----------|----------|----------|---------------|------|-----|
| ENSMUSG00000089876 | -1,05E+00 | -0,816153241 | 5,35E+00  | 2,07E-02 | 1,55E-01 | Tmem102       | 0,48 | No  |
| ENSMUSG00000089879 | 7,78E-01  | -2,963243536 | 3,33E-01  | 5,64E-01 | 8,26E-01 | 4930448H16Rik | 1,71 | No  |
| ENSMUSG00000089883 | -1,28E-01 | -0,088475061 | 1,83E-01  | 6,69E-01 | 8,87E-01 | Gm3355        | 0,91 | No  |
| ENSMUSG00000089886 | -2,39E-01 | 0,824779288  | 1,13E+00  | 2,88E-01 | 5,84E-01 | Gm16184       | 0,85 | No  |
| ENSMUSG00000089889 | -4,01E-02 | -0,175652328 | 1,76E-02  | 8,94E-01 | 1,00E+00 | 0610040B10Rik | 0,97 | No  |
| ENSMUSG00000089890 | 2,62E+00  | -3,033654625 | 2,66E+00  | 1,03E-01 | 3,95E-01 | Gm16055       | 6,16 | No  |
| ENSMUSG00000089892 | -3,83E-02 | -3,107651936 | -7,91E-11 | 1,00E+00 | 1,00E+00 | Olf1199       | 0,97 | No  |
| ENSMUSG00000089900 | -1,97E-01 | -0,466778557 | 2,74E-01  | 6,01E-01 | 8,47E-01 | Tbc1d22bos    | 0,87 | No  |
| ENSMUSG00000089901 | 7,11E-01  | 3,541846054  | 5,11E+01  | 8,77E-13 | 1,08E-10 | Gm8113        | 1,64 | Yes |
| ENSMUSG00000089902 | 1,57E-01  | 1,249034294  | 6,77E-01  | 4,11E-01 | 7,07E-01 | Gm13625       | 1,11 | No  |
| ENSMUSG00000089904 | 7,43E-01  | -2,963261206 | 3,01E-01  | 5,83E-01 | 8,38E-01 | Gm15664       | 1,67 | No  |
| ENSMUSG00000089906 | -7,87E-01 | -0,963056143 | 2,95E+00  | 8,56E-02 | 3,76E-01 | Gm6428        | 0,58 | No  |
| ENSMUSG00000089908 | -1,20E+00 | -2,355576288 | 1,85E+00  | 1,74E-01 | 5,31E-01 | Gm16558       | 0,44 | No  |
| ENSMUSG00000089909 | -2,71E+00 | -2,963182239 | 2,92E+00  | 8,75E-02 | 3,78E-01 | Gm16164       | 0,15 | No  |
| ENSMUSG00000089911 | 1,44E-01  | 5,966337374  | 4,79E+00  | 2,86E-02 | 1,92E-01 | Mfsd14a       | 1,11 | No  |
| ENSMUSG00000089917 | -7,65E-02 | 5,209133317  | 1,15E+00  | 2,84E-01 | 5,80E-01 | Uckl1         | 0,95 | No  |
| ENSMUSG00000089926 | -1,89E+00 | -3,1076441   | 1,42E+00  | 2,33E-01 | 5,50E-01 | Gm15734       | 0,27 | No  |
| ENSMUSG00000089929 | -3,26E-01 | 8,029328448  | 3,15E+01  | 2,00E-08 | 1,30E-06 | Bcl2a1b       | 0,80 | Yes |
| ENSMUSG00000089931 | 2,41E-02  | 2,505347824  | 3,51E-02  | 8,51E-01 | 9,90E-01 | Gm8459        | 1,02 | No  |
| ENSMUSG00000089936 | -2,28E-01 | 2,075398525  | 2,40E+00  | 1,21E-01 | 4,35E-01 | Gm16199       | 0,85 | No  |
| ENSMUSG00000089937 | -2,76E-01 | -2,600666282 | 7,40E-02  | 7,86E-01 | 9,52E-01 | Gm7281        | 0,83 | No  |
| ENSMUSG00000089940 | -6,25E-02 | 0,980072174  | 9,04E-02  | 7,64E-01 | 9,39E-01 | Gm4117        | 0,96 | No  |
| ENSMUSG00000089942 | 2,21E-01  | 6,673580615  | 1,27E+01  | 3,69E-04 | 7,15E-03 | Pira2         | 1,17 | Yes |
| ENSMUSG00000089943 | -2,56E-01 | 2,856783959  | 4,73E+00  | 2,96E-02 | 1,96E-01 | Ugt1a5        | 0,84 | No  |
| ENSMUSG00000089945 | -7,93E-01 | 3,404220076  | 6,18E+01  | 3,72E-15 | 5,84E-13 | Pakap         | 0,58 | Yes |
| ENSMUSG00000089949 | 1,85E+00  | -3,107657832 | 1,35E+00  | 2,46E-01 | 5,50E-01 | Gm16137       | 3,61 | No  |
| ENSMUSG00000089951 | 3,09E-01  | 1,146010413  | 2,38E+00  | 1,23E-01 | 4,38E-01 | Gm14435       | 1,24 | No  |
| ENSMUSG00000089952 | -1,33E+00 | -2,896104821 | 1,11E+00  | 2,92E-01 | 5,88E-01 | 4933413C19Rik | 0,40 | No  |
| ENSMUSG00000089953 | -1,94E+00 | -3,107619243 | 1,50E+00  | 2,21E-01 | 5,50E-01 | Rnf224        | 0,26 | No  |
| ENSMUSG00000089956 | 4,38E-01  | -2,015773194 | 4,48E-01  | 5,03E-01 | 7,88E-01 | Gm16553       | 1,35 | No  |
| ENSMUSG00000089958 | 2,73E-01  | -0,522670733 | 5,85E-01  | 4,44E-01 | 7,36E-01 | Gm16165       | 1,21 | No  |
| ENSMUSG00000089959 | 1,65E-01  | -2,185534785 | 4,41E-02  | 8,34E-01 | 9,79E-01 | Gm16268       | 1,12 | No  |

|                    |           |              |          |          |          |               |      |    |
|--------------------|-----------|--------------|----------|----------|----------|---------------|------|----|
| ENSMUSG00000089960 | -2,16E-01 | 2,861658721  | 3,38E+00 | 6,58E-02 | 3,22E-01 | Ugt1a1        | 0,86 | No |
| ENSMUSG00000089961 | 3,63E-01  | -2,574127598 | 1,19E-01 | 7,30E-01 | 9,21E-01 | Gm16567       | 1,29 | No |
| ENSMUSG00000089965 | -2,78E-01 | -1,378206589 | 2,70E-01 | 6,04E-01 | 8,48E-01 | Gm16236       | 0,83 | No |
| ENSMUSG00000089967 | 2,24E-01  | 0,742480156  | 1,00E+00 | 3,17E-01 | 6,17E-01 | Gm16550       | 1,17 | No |
| ENSMUSG00000089968 | 1,36E-01  | 0,660952154  | 3,14E-01 | 5,75E-01 | 8,34E-01 | Nckap5los     | 1,10 | No |
| ENSMUSG00000089972 | -1,49E+00 | -2,497578941 | 2,29E+00 | 1,30E-01 | 4,52E-01 | Gm16318       | 0,36 | No |
| ENSMUSG00000089975 | -1,89E+00 | -3,1076441   | 1,42E+00 | 2,33E-01 | 5,50E-01 | Gm7420        | 0,27 | No |
| ENSMUSG00000089976 | -2,91E-01 | -2,254145117 | 1,27E-01 | 7,22E-01 | 9,16E-01 | Gm2389        | 0,82 | No |
| ENSMUSG00000089979 | -1,29E-01 | 0,179615468  | 2,19E-01 | 6,40E-01 | 8,70E-01 | Gm15954       | 0,91 | No |
| ENSMUSG00000089983 | -9,46E-01 | -1,896029878 | 2,51E+00 | 1,13E-01 | 4,15E-01 | 2010320007Rik | 0,52 | No |
| ENSMUSG00000089984 | -2,86E-01 | 0,344759667  | 1,31E+00 | 2,52E-01 | 5,50E-01 | Fbxo24        | 0,82 | No |
| ENSMUSG00000089987 | 7,11E-01  | -2,401363468 | 7,34E-01 | 3,92E-01 | 6,92E-01 | Gpx2-ps1      | 1,64 | No |
| ENSMUSG00000089988 | 5,61E-03  | -1,246990633 | 1,44E-04 | 9,90E-01 | 1,00E+00 | Gm16238       | 1,00 | No |
| ENSMUSG00000089989 | -5,76E-02 | 4,134712312  | 4,43E-01 | 5,06E-01 | 7,90E-01 | Gm45713       | 0,96 | No |
| ENSMUSG00000089991 | -1,70E+00 | -2,289405378 | 4,36E+00 | 3,68E-02 | 2,28E-01 | Gm16332       | 0,31 | No |
| ENSMUSG00000089992 | 1,10E-01  | 5,71058956   | 2,64E+00 | 1,04E-01 | 3,97E-01 | G6pd2         | 1,08 | No |
| ENSMUSG00000089993 | -2,54E-01 | 3,831117588  | 7,74E+00 | 5,39E-03 | 5,91E-02 | Gm5822        | 0,84 | No |
| ENSMUSG00000089994 | 3,57E-01  | -1,311218793 | 5,15E-01 | 4,73E-01 | 7,61E-01 | Gm16239       | 1,28 | No |
| ENSMUSG00000089995 | 8,37E-01  | -2,711718711 | 6,11E-01 | 4,35E-01 | 7,27E-01 | Gm15716       | 1,79 | No |
| ENSMUSG00000089997 | 1,88E+00  | -2,963233455 | 1,36E+00 | 2,43E-01 | 5,50E-01 | 1810020005Rik | 3,67 | No |
| ENSMUSG00000089998 | 1,17E-01  | 2,510159865  | 8,65E-01 | 3,52E-01 | 6,53E-01 | Phtf1os       | 1,08 | No |
| ENSMUSG00000089999 | 7,87E-03  | 6,4460012    | 1,55E-02 | 9,01E-01 | 1,00E+00 | Gm6485        | 1,01 | No |
| ENSMUSG00000090000 | -4,79E-02 | 5,09692494   | 4,30E-01 | 5,12E-01 | 7,95E-01 | Ier3ip1       | 0,97 | No |
| ENSMUSG00000090001 | 7,04E-01  | -2,770635006 | 2,71E-01 | 6,03E-01 | 8,48E-01 | Gm9719        | 1,63 | No |
| ENSMUSG00000090002 | -3,88E-03 | -3,03362684  | 4,02E-12 | 1,00E+00 | 1,00E+00 | Gm16006       | 1,00 | No |
| ENSMUSG00000090004 | 3,15E+00  | -2,96329986  | 4,04E+00 | 4,45E-02 | 2,51E-01 | Gm16125       | 8,85 | No |
| ENSMUSG00000090005 | 6,18E-01  | -2,497634187 | 4,26E-01 | 5,14E-01 | 7,96E-01 | Gm16540       | 1,53 | No |
| ENSMUSG00000090007 | -2,71E+00 | -2,963182239 | 2,92E+00 | 8,75E-02 | 3,78E-01 | Rpl30-ps2     | 0,15 | No |
| ENSMUSG00000090009 | 1,96E-02  | 1,759332748  | 1,47E-02 | 9,03E-01 | 1,00E+00 | Gm16282       | 1,01 | No |
| ENSMUSG00000090015 | -1,07E-01 | 2,674134948  | 7,50E-01 | 3,87E-01 | 6,87E-01 | Gm15446       | 0,93 | No |
| ENSMUSG00000090016 | -1,44E-01 | -1,998074758 | 4,92E-02 | 8,24E-01 | 9,73E-01 | Gm16578       | 0,91 | No |
| ENSMUSG00000090017 | 2,30E-01  | -2,600641843 | 6,64E-02 | 7,97E-01 | 9,58E-01 | Gm16213       | 1,17 | No |



|                    |           |              |           |          |          |               |      |     |
|--------------------|-----------|--------------|-----------|----------|----------|---------------|------|-----|
| ENSMUSG00000090019 | -1,76E-01 | 2,96766572   | 2,44E+00  | 1,19E-01 | 4,28E-01 | Gimap1        | 0,89 | No  |
| ENSMUSG00000090021 | 1,58E-02  | 5,6859219    | 5,45E-02  | 8,15E-01 | 9,69E-01 | Gm6493        | 1,01 | No  |
| ENSMUSG00000090023 | 1,61E-01  | 2,283922798  | 1,37E+00  | 2,42E-01 | 5,50E-01 | Gm16302       | 1,12 | No  |
| ENSMUSG00000090024 | -3,84E-02 | -2,929310006 | 5,66E-04  | 9,81E-01 | 1,00E+00 | Gm16350       | 0,97 | No  |
| ENSMUSG00000090026 | 5,32E-01  | -0,516496327 | 2,14E+00  | 1,43E-01 | 4,79E-01 | Gm15996       | 1,45 | No  |
| ENSMUSG00000090027 | 3,98E-01  | 1,35489164   | 4,52E+00  | 3,36E-02 | 2,15E-01 | Gm15740       | 1,32 | No  |
| ENSMUSG00000090030 | -6,62E-01 | -1,535317134 | 1,56E+00  | 2,12E-01 | 5,50E-01 | A430072P03Rik | 0,63 | No  |
| ENSMUSG00000090031 | -4,68E-02 | 1,690348068  | 8,35E-02  | 7,73E-01 | 9,44E-01 | 4732440D04Rik | 0,97 | No  |
| ENSMUSG00000090034 | -1,54E-01 | -1,424779682 | 8,86E-02  | 7,66E-01 | 9,40E-01 | Gm15917       | 0,90 | No  |
| ENSMUSG00000090035 | 3,13E-02  | 4,28486607   | 1,40E-01  | 7,08E-01 | 9,09E-01 | Galnt4        | 1,02 | No  |
| ENSMUSG00000090036 | 8,01E-01  | 0,763153644  | 1,17E+01  | 6,35E-04 | 1,12E-02 | Gm15900       | 1,74 | Yes |
| ENSMUSG00000090038 | -8,82E-02 | 2,157155663  | 3,84E-01  | 5,36E-01 | 8,08E-01 | Gm16573       | 0,94 | No  |
| ENSMUSG00000090041 | 1,21E+00  | -2,655190041 | 9,14E-01  | 3,39E-01 | 6,40E-01 | Gm16027       | 2,32 | No  |
| ENSMUSG00000090042 | -2,25E-01 | 0,425972965  | 7,79E-01  | 3,77E-01 | 6,78E-01 | Gm8550        | 0,86 | No  |
| ENSMUSG00000090043 | -3,87E+00 | -2,71164854  | 7,17E+00  | 7,42E-03 | 7,49E-02 | Gm16167       | 0,07 | No  |
| ENSMUSG00000090044 | 5,97E-03  | -3,1461183   | -3,40E-10 | 1,00E+00 | 1,00E+00 | Gm16557       | 1,00 | No  |
| ENSMUSG00000090053 | -5,48E-01 | -0,904371887 | 1,44E+00  | 2,30E-01 | 5,50E-01 | Palm2         | 0,68 | No  |
| ENSMUSG00000090054 | 2,01E-02  | 2,606963008  | 2,51E-02  | 8,74E-01 | 1,00E+00 | Gm15629       | 1,01 | No  |
| ENSMUSG00000090057 | -7,79E-02 | -1,863747533 | 1,70E-02  | 8,96E-01 | 1,00E+00 | Gm16333       | 0,95 | No  |
| ENSMUSG00000090061 | 4,14E-01  | -2,600731455 | 1,34E-01  | 7,14E-01 | 9,12E-01 | Nwd2          | 1,33 | No  |
| ENSMUSG00000090062 | 1,57E-01  | 2,785063729  | 1,62E+00  | 2,02E-01 | 5,50E-01 | Galnt6os      | 1,11 | No  |
| ENSMUSG00000090066 | 1,87E+00  | -3,107639691 | 1,38E+00  | 2,40E-01 | 5,50E-01 | 1110002E22Rik | 3,67 | No  |
| ENSMUSG00000090067 | -4,76E-01 | -2,268085844 | 4,17E-01  | 5,18E-01 | 7,98E-01 | Gm2976        | 0,72 | No  |
| ENSMUSG00000090069 | 5,18E-02  | 2,75478396   | 1,86E-01  | 6,67E-01 | 8,86E-01 | E430024P14Rik | 1,04 | No  |
| ENSMUSG00000090070 | 1,07E-01  | -1,300421096 | 5,16E-02  | 8,20E-01 | 9,71E-01 | Gm16577       | 1,08 | No  |
| ENSMUSG00000090075 | 1,49E-01  | -1,697338621 | 6,94E-02  | 7,92E-01 | 9,55E-01 | Gm16251       | 1,11 | No  |
| ENSMUSG00000090077 | -8,67E-02 | 3,554558438  | 8,06E-01  | 3,69E-01 | 6,71E-01 | Lime1         | 0,94 | No  |
| ENSMUSG00000090078 | -7,52E-01 | -2,185670889 | 1,15E+00  | 2,83E-01 | 5,80E-01 | Gm16147       | 0,59 | No  |
| ENSMUSG00000090079 | -1,40E-01 | -1,929282423 | 4,46E-02  | 8,33E-01 | 9,78E-01 | Gm15849       | 0,91 | No  |
| ENSMUSG00000090080 | 9,16E-02  | -1,711676867 | 1,85E-02  | 8,92E-01 | 1,00E+00 | Gm15872       | 1,07 | No  |
| ENSMUSG00000090081 | 2,28E-01  | -2,770626725 | 3,80E-02  | 8,46E-01 | 9,87E-01 | Gm16587       | 1,17 | No  |
| ENSMUSG00000090083 | -8,70E-02 | 3,69705954   | 8,34E-01  | 3,61E-01 | 6,62E-01 | Rnf8          | 0,94 | No  |

|                    |           |              |           |          |          |               |      |     |
|--------------------|-----------|--------------|-----------|----------|----------|---------------|------|-----|
| ENSMUSG00000090086 | -3,70E-01 | 4,203342462  | 1,89E+01  | 1,34E-05 | 4,35E-04 | AI480526      | 0,77 | Yes |
| ENSMUSG00000090093 | 1,28E-01  | 1,175299484  | 4,50E-01  | 5,02E-01 | 7,87E-01 | Gm14399       | 1,09 | No  |
| ENSMUSG00000090095 | -3,74E-02 | -2,770612126 | 1,18E-03  | 9,73E-01 | 1,00E+00 | Rpl29-ps1     | 0,97 | No  |
| ENSMUSG00000090098 | 6,06E-01  | -0,389902959 | 3,00E+00  | 8,32E-02 | 3,71E-01 | Alms1-ps2     | 1,52 | No  |
| ENSMUSG00000090100 | 4,57E-02  | 3,960129082  | 2,61E-01  | 6,09E-01 | 8,51E-01 | Ttbk2         | 1,03 | No  |
| ENSMUSG00000090101 | -5,54E-01 | -2,522668042 | 2,41E-01  | 6,24E-01 | 8,58E-01 | Snhg9         | 0,68 | No  |
| ENSMUSG00000090103 | -1,63E-01 | 0,41903911   | 4,26E-01  | 5,14E-01 | 7,96E-01 | Gm16094       | 0,89 | No  |
| ENSMUSG00000090104 | -3,83E-02 | -3,107651936 | -7,91E-11 | 1,00E+00 | 1,00E+00 | Slmapos2      | 0,97 | No  |
| ENSMUSG00000090105 | 5,68E-01  | -0,621011435 | 2,05E+00  | 1,52E-01 | 4,94E-01 | Gm15890       | 1,48 | No  |
| ENSMUSG00000090106 | 1,85E+00  | -3,107657832 | 1,35E+00  | 2,46E-01 | 5,50E-01 | Gm15838       | 3,61 | No  |
| ENSMUSG00000090109 | 7,45E-01  | -2,896140634 | 3,03E-01  | 5,82E-01 | 8,38E-01 | Ear-ps10      | 1,68 | No  |
| ENSMUSG00000090111 | 1,81E+00  | -3,10765737  | 1,28E+00  | 2,58E-01 | 5,50E-01 | Gm16584       | 3,49 | No  |
| ENSMUSG00000090112 | 1,00E-01  | 4,678923365  | 1,68E+00  | 1,94E-01 | 5,50E-01 | Shprh         | 1,07 | No  |
| ENSMUSG00000090113 | -1,92E+00 | -3,070132283 | 1,46E+00  | 2,27E-01 | 5,50E-01 | Nhlrc4        | 0,26 | No  |
| ENSMUSG00000090114 | -5,74E-01 | 0,237204222  | 4,32E+00  | 3,76E-02 | 2,30E-01 | Gm3076        | 0,67 | No  |
| ENSMUSG00000090115 | 7,54E-02  | 3,850598577  | 6,79E-01  | 4,10E-01 | 7,06E-01 | Usp49         | 1,05 | No  |
| ENSMUSG00000090117 | -1,67E-01 | 1,120196644  | 6,84E-01  | 4,08E-01 | 7,05E-01 | Gm16541       | 0,89 | No  |
| ENSMUSG00000090118 | 1,56E-01  | 1,354680972  | 7,04E-01  | 4,01E-01 | 6,99E-01 | Gm16163       | 1,11 | No  |
| ENSMUSG00000090119 | -6,05E-03 | 4,193345916  | 5,03E-03  | 9,43E-01 | 1,00E+00 | Gm8185        | 1,00 | No  |
| ENSMUSG00000090120 | -6,37E-01 | -1,800979309 | 7,88E-01  | 3,75E-01 | 6,76E-01 | A730090N16Rik | 0,64 | No  |
| ENSMUSG00000090121 | 8,43E-01  | -2,355620028 | 8,54E-01  | 3,56E-01 | 6,57E-01 | Abhd12b       | 1,79 | No  |
| ENSMUSG00000090124 | -2,19E-01 | 6,007203233  | 1,12E+01  | 8,26E-04 | 1,38E-02 | Ugt1a7c       | 0,86 | Yes |
| ENSMUSG00000090125 | -1,67E+00 | -1,863515914 | 5,39E+00  | 2,02E-02 | 1,52E-01 | Pou3f1        | 0,31 | No  |
| ENSMUSG00000090126 | 2,02E-01  | 1,836380479  | 1,56E+00  | 2,12E-01 | 5,50E-01 | 4930519F09Rik | 1,15 | No  |
| ENSMUSG00000090128 | 1,86E+00  | -3,033661846 | 1,35E+00  | 2,46E-01 | 5,50E-01 | Gm16038       | 3,62 | No  |
| ENSMUSG00000090129 | -1,87E+00 | -3,107637761 | 1,39E+00  | 2,38E-01 | 5,50E-01 | Olf287        | 0,27 | No  |
| ENSMUSG00000090136 | -1,17E-01 | 5,997530728  | 3,18E+00  | 7,47E-02 | 3,47E-01 | Gm10177       | 0,92 | No  |
| ENSMUSG00000090137 | -1,30E-01 | 5,739546522  | 3,76E+00  | 5,26E-02 | 2,80E-01 | Uba52         | 0,91 | No  |
| ENSMUSG00000090138 | 1,11E-02  | 1,382294322  | 3,67E-03  | 9,52E-01 | 1,00E+00 | Gm3687        | 1,01 | No  |
| ENSMUSG00000090142 | 7,16E-01  | -2,896133101 | 2,78E-01  | 5,98E-01 | 8,45E-01 | Gm15795       | 1,64 | No  |
| ENSMUSG00000090145 | -2,24E-01 | 2,9343333    | 3,79E+00  | 5,15E-02 | 2,76E-01 | Ugt1a6b       | 0,86 | No  |
| ENSMUSG00000090150 | -1,10E-01 | 4,114660311  | 1,62E+00  | 2,03E-01 | 5,50E-01 | Acad11        | 0,93 | No  |

|                    |           |              |           |          |          |               |      |     |
|--------------------|-----------|--------------|-----------|----------|----------|---------------|------|-----|
| ENSMUSG00000090151 | 1,57E+00  | -2,333207636 | 2,68E+00  | 1,02E-01 | 3,94E-01 | Gm16043       | 2,96 | No  |
| ENSMUSG00000090157 | 9,02E-02  | 1,555619459  | 2,72E-01  | 6,02E-01 | 8,48E-01 | Gm16534       | 1,06 | No  |
| ENSMUSG00000090159 | -3,83E-02 | -3,107651936 | -7,91E-11 | 1,00E+00 | 1,00E+00 | Gm8580        | 0,97 | No  |
| ENSMUSG00000090162 | -3,67E-01 | -2,448669469 | 1,70E-01  | 6,80E-01 | 8,93E-01 | Gm6808        | 0,78 | No  |
| ENSMUSG00000090164 | -9,93E-02 | 3,220897584  | 9,10E-01  | 3,40E-01 | 6,41E-01 | BC035044      | 0,93 | No  |
| ENSMUSG00000090165 | -2,25E-01 | 2,828466195  | 3,60E+00  | 5,77E-02 | 2,96E-01 | Ugt1a10       | 0,86 | No  |
| ENSMUSG00000090166 | 5,05E-01  | 2,101428163  | 1,10E+01  | 9,02E-04 | 1,49E-02 | Ear10         | 1,42 | Yes |
| ENSMUSG00000090168 | -1,87E+00 | -3,107637761 | 1,39E+00  | 2,38E-01 | 5,50E-01 | D630014O11Rik | 0,27 | No  |
| ENSMUSG00000090171 | -2,32E-01 | 2,865282095  | 3,90E+00  | 4,83E-02 | 2,64E-01 | Ugt1a2        | 0,85 | No  |
| ENSMUSG00000090173 | 6,49E-01  | -0,503854929 | 3,44E+00  | 6,38E-02 | 3,16E-01 | Fbxw10        | 1,57 | No  |
| ENSMUSG00000090174 | 1,33E-02  | 2,276106462  | 9,12E-03  | 9,24E-01 | 1,00E+00 | Gm10612       | 1,01 | No  |
| ENSMUSG00000090175 | -2,25E-01 | 2,828466195  | 3,60E+00  | 5,77E-02 | 2,96E-01 | Ugt1a9        | 0,86 | No  |
| ENSMUSG00000090176 | 3,79E-01  | 1,29702776   | 3,75E+00  | 5,29E-02 | 2,80E-01 | Cd200r2       | 1,30 | No  |
| ENSMUSG00000090179 | -9,47E-01 | -2,548205389 | 7,86E-01  | 3,75E-01 | 6,76E-01 | Gm16307       | 0,52 | No  |
| ENSMUSG00000090180 | -5,88E-02 | -3,033652696 | 1,62E-03  | 9,68E-01 | 1,00E+00 | Ang-ps1       | 0,96 | No  |
| ENSMUSG00000090185 | -6,55E-01 | -0,587487142 | 3,34E+00  | 6,75E-02 | 3,27E-01 | Gm15523       | 0,63 | No  |
| ENSMUSG00000090186 | -1,23E-01 | 0,521013192  | 2,54E-01  | 6,14E-01 | 8,53E-01 | Gm7592        | 0,92 | No  |
| ENSMUSG00000090188 | -3,74E-01 | -2,289434672 | 1,60E-01  | 6,90E-01 | 8,99E-01 | Gm7418        | 0,77 | No  |
| ENSMUSG00000090191 | 1,87E+00  | -3,107639691 | 1,38E+00  | 2,40E-01 | 5,50E-01 | 9230105E05Rik | 3,67 | No  |
| ENSMUSG00000090192 | -7,41E-01 | -2,448633788 | 6,15E-01  | 4,33E-01 | 7,26E-01 | Gm16556       | 0,60 | No  |
| ENSMUSG00000090193 | -9,84E-01 | -2,574196709 | 8,48E-01  | 3,57E-01 | 6,58E-01 | Gm15995       | 0,51 | No  |
| ENSMUSG00000090194 | -6,46E-01 | 1,320879634  | 1,26E+01  | 3,88E-04 | 7,45E-03 | Gm16161       | 0,64 | Yes |
| ENSMUSG00000090200 | 1,11E+00  | -2,54826776  | 1,17E+00  | 2,79E-01 | 5,75E-01 | 1700025N21Rik | 2,16 | No  |
| ENSMUSG00000090202 | 1,17E+00  | -2,65516846  | 1,07E+00  | 3,01E-01 | 5,98E-01 | 4930503B20Rik | 2,25 | No  |
| ENSMUSG00000090203 | -7,38E-02 | -3,033659033 | 2,66E-03  | 9,59E-01 | 1,00E+00 | AU015336      | 0,95 | No  |
| ENSMUSG00000090206 | -3,54E-02 | 0,277410203  | 1,84E-02  | 8,92E-01 | 1,00E+00 | Tepp          | 0,98 | No  |
| ENSMUSG00000090207 | -2,93E-01 | 2,817608031  | 5,91E+00  | 1,50E-02 | 1,26E-01 | 4930524O07Rik | 0,82 | No  |
| ENSMUSG00000090208 | 5,97E-03  | -3,1461183   | -3,40E-10 | 1,00E+00 | 1,00E+00 | Gm15851       | 1,00 | No  |
| ENSMUSG00000090210 | 5,72E-01  | 0,699138919  | 6,31E+00  | 1,20E-02 | 1,07E-01 | ltga10        | 1,49 | No  |
| ENSMUSG00000090211 | -7,26E-01 | -2,600702887 | 5,90E-01  | 4,42E-01 | 7,34E-01 | Gm16050       | 0,60 | No  |
| ENSMUSG00000090213 | 7,57E-02  | 8,050461221  | 1,69E+00  | 1,93E-01 | 5,50E-01 | Tmem189       | 1,05 | No  |
| ENSMUSG00000090215 | 1,12E-01  | 1,029994648  | 3,34E-01  | 5,64E-01 | 8,26E-01 | Trim34b       | 1,08 | No  |

|                    |           |              |           |          |          |               |      |     |
|--------------------|-----------|--------------|-----------|----------|----------|---------------|------|-----|
| ENSMUSG00000090216 | 1,95E-01  | 1,63384447   | 1,36E+00  | 2,43E-01 | 5,50E-01 | Gm16549       | 1,14 | No  |
| ENSMUSG00000090217 | -8,78E-01 | -1,77061689  | 2,35E+00  | 1,25E-01 | 4,43E-01 | Gm16116       | 0,54 | No  |
| ENSMUSG00000090222 | 1,43E-02  | 0,934209093  | 4,69E-03  | 9,45E-01 | 1,00E+00 | lfi203-ps     | 1,01 | No  |
| ENSMUSG00000090223 | -7,46E-01 | -1,946085364 | 1,04E+00  | 3,08E-01 | 6,06E-01 | Pcp4          | 0,60 | No  |
| ENSMUSG00000090224 | -2,66E+00 | -3,033639428 | 2,81E+00  | 9,35E-02 | 3,83E-01 | Gm15974       | 0,16 | No  |
| ENSMUSG00000090227 | 3,14E-02  | -3,107617333 | -7,69E-10 | 1,00E+00 | 1,00E+00 | Gm16554       | 1,02 | No  |
| ENSMUSG00000090230 | 3,51E-01  | 2,144047     | 6,10E+00  | 1,35E-02 | 1,17E-01 | Gm16315       | 1,28 | No  |
| ENSMUSG00000090231 | -3,79E-02 | 4,490248455  | 2,25E-01  | 6,35E-01 | 8,67E-01 | Cfb           | 0,97 | No  |
| ENSMUSG00000090232 | -3,16E+00 | -2,963246013 | 4,20E+00  | 4,04E-02 | 2,38E-01 | Gm16132       | 0,11 | No  |
| ENSMUSG00000090235 | -4,32E-01 | -0,372399212 | 1,58E+00  | 2,09E-01 | 5,50E-01 | Gm16244       | 0,74 | No  |
| ENSMUSG00000090236 | 8,61E-01  | -0,954724024 | 3,90E+00  | 4,83E-02 | 2,64E-01 | Car15         | 1,82 | No  |
| ENSMUSG00000090242 | 3,14E-02  | -3,107617333 | -7,69E-10 | 1,00E+00 | 1,00E+00 | Rpl17-ps11    | 1,02 | No  |
| ENSMUSG00000090243 | -7,09E-02 | -1,088757452 | 2,23E-02  | 8,81E-01 | 1,00E+00 | Gm16103       | 0,95 | No  |
| ENSMUSG00000090244 | 1,40E-01  | -1,060920952 | 9,86E-02  | 7,54E-01 | 9,33E-01 | Gm16572       | 1,10 | No  |
| ENSMUSG00000090246 | -8,91E-02 | 2,343394438  | 4,39E-01  | 5,08E-01 | 7,92E-01 | Gm17017       | 0,94 | No  |
| ENSMUSG00000090247 | -4,12E-01 | 3,009539102  | 1,33E+01  | 2,63E-04 | 5,45E-03 | Bloc1s1       | 0,75 | Yes |
| ENSMUSG00000090248 | 7,58E-02  | -1,195647426 | 2,75E-02  | 8,68E-01 | 1,00E+00 | Gm14027       | 1,05 | No  |
| ENSMUSG00000090249 | 1,86E+00  | -3,033661846 | 1,35E+00  | 2,46E-01 | 5,50E-01 | Gm3287        | 3,62 | No  |
| ENSMUSG00000090252 | -4,38E-03 | -1,683059878 | 5,00E-05  | 9,94E-01 | 1,00E+00 | Gm16028       | 1,00 | No  |
| ENSMUSG00000090254 | -1,56E+00 | -1,424750624 | 9,30E+00  | 2,29E-03 | 3,12E-02 | Gm1965        | 0,34 | Yes |
| ENSMUSG00000090256 | -2,26E-01 | -0,755670882 | 3,13E-01  | 5,76E-01 | 8,34E-01 | Alms1-ps1     | 0,86 | No  |
| ENSMUSG00000090257 | -5,12E-01 | 0,461628295  | 4,45E+00  | 3,49E-02 | 2,21E-01 | Gm4524        | 0,70 | No  |
| ENSMUSG00000090258 | -2,05E-01 | 3,315930654  | 3,87E+00  | 4,93E-02 | 2,68E-01 | Churc1        | 0,87 | No  |
| ENSMUSG00000090259 | -6,43E-02 | -2,83202899  | 2,81E-03  | 9,58E-01 | 1,00E+00 | Gm16545       | 0,96 | No  |
| ENSMUSG00000090260 | 2,61E+00  | -3,033672762 | 2,63E+00  | 1,05E-01 | 3,97E-01 | 2810442N19Rik | 6,10 | No  |
| ENSMUSG00000090263 | 1,14E+00  | -2,497577224 | 1,23E+00  | 2,68E-01 | 5,64E-01 | D730045A05Rik | 2,20 | No  |
| ENSMUSG00000090264 | 6,42E-03  | 2,342014478  | 2,25E-03  | 9,62E-01 | 1,00E+00 | Eif4ebp3      | 1,00 | No  |
| ENSMUSG00000090265 | 1,87E+00  | -3,107639691 | 1,38E+00  | 2,40E-01 | 5,50E-01 | Gm9550        | 3,67 | No  |
| ENSMUSG00000090266 | 1,30E-01  | 5,717649845  | 3,70E+00  | 5,46E-02 | 2,86E-01 | Mettl23       | 1,09 | No  |
| ENSMUSG00000090268 | 1,81E+00  | -3,10765737  | 1,28E+00  | 2,58E-01 | 5,50E-01 | Gm5286        | 3,49 | No  |
| ENSMUSG00000090272 | -8,43E-02 | 6,005554198  | 1,67E+00  | 1,96E-01 | 5,50E-01 | Mndal         | 0,94 | No  |
| ENSMUSG00000090273 | -3,29E-01 | -1,02452687  | 5,11E-01  | 4,75E-01 | 7,63E-01 | Prr22         | 0,80 | No  |

|                    |           |              |           |          |          |               |      |    |
|--------------------|-----------|--------------|-----------|----------|----------|---------------|------|----|
| ENSMUSG00000090277 | 9,01E-03  | -3,107646452 | -5,16E-10 | 1,00E+00 | 1,00E+00 | Gm8338        | 1,01 | No |
| ENSMUSG00000090286 | 3,14E-02  | -3,107617333 | -7,69E-10 | 1,00E+00 | 1,00E+00 | Gm17615       | 1,02 | No |
| ENSMUSG00000090290 | 1,65E-01  | 3,614302094  | 2,90E+00  | 8,88E-02 | 3,79E-01 | Tarbp1        | 1,12 | No |
| ENSMUSG00000090291 | -2,35E-01 | -1,40136737  | 2,20E-01  | 6,39E-01 | 8,69E-01 | Lrrc10b       | 0,85 | No |
| ENSMUSG00000090293 | -7,34E-01 | -1,574061123 | 1,41E+00  | 2,35E-01 | 5,50E-01 | Gm17034       | 0,60 | No |
| ENSMUSG00000090300 | -7,01E-02 | -1,257504249 | 1,84E-02  | 8,92E-01 | 1,00E+00 | Gm17119       | 0,95 | No |
| ENSMUSG00000090303 | -1,79E+00 | -2,600672159 | 2,24E+00  | 1,35E-01 | 4,62E-01 | Vmn2r-ps3     | 0,29 | No |
| ENSMUSG00000090305 | 1,00E+00  | -1,548260638 | 2,64E+00  | 1,04E-01 | 3,97E-01 | Gm5459        | 2,00 | No |
| ENSMUSG00000090307 | -6,14E-02 | 5,115398391  | 7,09E-01  | 4,00E-01 | 6,99E-01 | 1700071M16Rik | 0,96 | No |
| ENSMUSG00000090317 | 2,02E-01  | -0,344309259 | 3,57E-01  | 5,50E-01 | 8,17E-01 | Gm17324       | 1,15 | No |
| ENSMUSG00000090319 | -3,50E-01 | 0,365519421  | 1,78E+00  | 1,82E-01 | 5,44E-01 | Gm4462        | 0,78 | No |
| ENSMUSG00000090322 | 1,66E-01  | 1,385099239  | 8,03E-01  | 3,70E-01 | 6,71E-01 | Gm17090       | 1,12 | No |
| ENSMUSG00000090323 | -1,40E-01 | 1,501117089  | 6,41E-01  | 4,23E-01 | 7,18E-01 | Gm5263        | 0,91 | No |
| ENSMUSG00000090326 | -1,05E+00 | -0,785566106 | 6,81E+00  | 9,06E-03 | 8,68E-02 | Dthd1         | 0,48 | No |
| ENSMUSG00000090327 | 1,42E-01  | 2,548791518  | 1,26E+00  | 2,62E-01 | 5,57E-01 | Gm17111       | 1,10 | No |
| ENSMUSG00000090329 | -1,25E+00 | -2,548227191 | 1,51E+00  | 2,20E-01 | 5,50E-01 | Gm17160       | 0,42 | No |
| ENSMUSG00000090330 | 8,60E-02  | 4,144651965  | 9,84E-01  | 3,21E-01 | 6,22E-01 | 9130221H12Rik | 1,06 | No |
| ENSMUSG00000090331 | -1,89E+00 | -3,1076441   | 1,42E+00  | 2,33E-01 | 5,50E-01 | Gm17199       | 0,27 | No |
| ENSMUSG00000090334 | -1,02E-01 | 1,993470189  | 4,62E-01  | 4,97E-01 | 7,82E-01 | Gm17149       | 0,93 | No |
| ENSMUSG00000090336 | 9,01E-03  | -3,107646452 | -5,16E-10 | 1,00E+00 | 1,00E+00 | 4932443I19Rik | 1,01 | No |
| ENSMUSG00000090338 | -3,83E-02 | -3,107651936 | -7,91E-11 | 1,00E+00 | 1,00E+00 | Gm17081       | 0,97 | No |
| ENSMUSG00000090342 | -4,86E-02 | -2,711649634 | 1,62E-03  | 9,68E-01 | 1,00E+00 | Vmn2r46       | 0,97 | No |
| ENSMUSG00000090346 | 2,74E-02  | -3,033621357 | 9,16E-12  | 1,00E+00 | 1,00E+00 | Vmn1r5        | 1,02 | No |
| ENSMUSG00000090350 | 2,67E+00  | -3,033636951 | 2,76E+00  | 9,68E-02 | 3,88E-01 | Gm17148       | 6,36 | No |
| ENSMUSG00000090352 | -1,86E+00 | -3,033612668 | 1,39E+00  | 2,38E-01 | 5,50E-01 | Gm3972        | 0,28 | No |
| ENSMUSG00000090353 | -1,92E+00 | -2,963214917 | 1,46E+00  | 2,27E-01 | 5,50E-01 | Gm17555       | 0,26 | No |
| ENSMUSG00000090357 | 1,65E-01  | 2,964620735  | 2,04E+00  | 1,53E-01 | 4,96E-01 | Gm17077       | 1,12 | No |
| ENSMUSG00000090358 | 1,90E+00  | -2,448737737 | 2,69E+00  | 1,01E-01 | 3,93E-01 | Gm2822        | 3,73 | No |
| ENSMUSG00000090363 | -1,20E+00 | -2,472900097 | 2,11E+00  | 1,46E-01 | 4,85E-01 | Gm3512        | 0,44 | No |
| ENSMUSG00000090369 | -1,90E-01 | -1,83198512  | 1,01E-01  | 7,51E-01 | 9,32E-01 | 4933411K16Rik | 0,88 | No |
| ENSMUSG00000090370 | -1,72E-02 | -0,683098671 | 2,10E-03  | 9,63E-01 | 1,00E+00 | Gm21989       | 0,99 | No |
| ENSMUSG00000090374 | -1,78E+00 | -2,929262132 | 1,58E+00  | 2,08E-01 | 5,50E-01 | Gm17232       | 0,29 | No |

|                    |           |              |           |          |          |               |      |     |
|--------------------|-----------|--------------|-----------|----------|----------|---------------|------|-----|
| ENSMUSG00000090381 | -5,13E-02 | 5,371090868  | 5,33E-01  | 4,65E-01 | 7,54E-01 | Gm6158        | 0,97 | No  |
| ENSMUSG00000090386 | -7,19E-01 | -2,548155166 | 5,79E-01  | 4,47E-01 | 7,37E-01 | Mir99ahg      | 0,61 | No  |
| ENSMUSG00000090387 | -8,06E-01 | -1,246838563 | 2,14E+00  | 1,44E-01 | 4,79E-01 | Gm17056       | 0,57 | No  |
| ENSMUSG00000090389 | -8,76E-04 | 4,625714767  | 1,24E-04  | 9,91E-01 | 1,00E+00 | Cdv3-ps       | 1,00 | No  |
| ENSMUSG00000090394 | -2,30E-01 | 4,739863258  | 8,99E+00  | 2,72E-03 | 3,55E-02 | 4930523C07Rik | 0,85 | Yes |
| ENSMUSG00000090397 | 5,82E-03  | 1,114433958  | 8,43E-04  | 9,77E-01 | 1,00E+00 | Gm17096       | 1,00 | No  |
| ENSMUSG00000090399 | 2,37E-01  | 2,97931958   | 4,21E+00  | 4,02E-02 | 2,38E-01 | Gm38399       | 1,18 | No  |
| ENSMUSG00000090406 | -5,03E-01 | -0,84773824  | 1,43E+00  | 2,31E-01 | 5,50E-01 | Gm17058       | 0,71 | No  |
| ENSMUSG00000090429 | -2,68E+00 | -2,831941819 | 2,86E+00  | 9,07E-02 | 3,82E-01 | Gm17271       | 0,16 | No  |
| ENSMUSG00000090439 | -6,51E-02 | -2,655155977 | 3,86E-03  | 9,50E-01 | 1,00E+00 | Gm17455       | 0,96 | No  |
| ENSMUSG00000090441 | -7,02E-02 | -2,247035634 | 7,41E-03  | 9,31E-01 | 1,00E+00 | Gm17651       | 0,95 | No  |
| ENSMUSG00000090451 | 1,04E+00  | -1,963185978 | 1,76E+00  | 1,84E-01 | 5,48E-01 | Gm6133        | 2,06 | No  |
| ENSMUSG00000090458 | 2,88E-01  | 5,036916323  | 1,53E+01  | 9,24E-05 | 2,26E-03 | Gm17122       | 1,22 | Yes |
| ENSMUSG00000090459 | 8,38E-01  | -0,473173924 | 5,74E+00  | 1,66E-02 | 1,34E-01 | Gm17210       | 1,79 | No  |
| ENSMUSG00000090460 | 2,41E-01  | -0,87986716  | 3,16E-01  | 5,74E-01 | 8,33E-01 | Gm17511       | 1,18 | No  |
| ENSMUSG00000090461 | -1,89E+00 | -3,1076441   | 1,42E+00  | 2,33E-01 | 5,50E-01 | lItifb        | 0,27 | No  |
| ENSMUSG00000090464 | 1,87E+00  | -3,107639691 | 1,38E+00  | 2,40E-01 | 5,50E-01 | Gm17140       | 3,67 | No  |
| ENSMUSG00000090467 | -9,99E-02 | 4,027763481  | 1,27E+00  | 2,59E-01 | 5,52E-01 | Gm4613        | 0,93 | No  |
| ENSMUSG00000090475 | -1,44E-01 | 2,914312588  | 1,57E+00  | 2,10E-01 | 5,50E-01 | Gm6245        | 0,91 | No  |
| ENSMUSG00000090489 | -2,56E-01 | 1,019207653  | 1,54E+00  | 2,15E-01 | 5,50E-01 | Gm17415       | 0,84 | No  |
| ENSMUSG00000090494 | 9,01E-03  | -3,107646452 | -5,16E-10 | 1,00E+00 | 1,00E+00 | Traj36        | 1,01 | No  |
| ENSMUSG00000090497 | 6,79E-01  | -0,627810789 | 3,73E+00  | 5,35E-02 | 2,82E-01 | Gm17611       | 1,60 | No  |
| ENSMUSG00000090500 | -5,22E-01 | -2,832008958 | 2,11E-01  | 6,46E-01 | 8,74E-01 | Gm17057       | 0,70 | No  |
| ENSMUSG00000090516 | -2,91E-01 | 6,066894035  | 2,01E+01  | 7,22E-06 | 2,50E-04 | Rps11-ps1     | 0,82 | Yes |
| ENSMUSG00000090523 | -5,01E-02 | 3,950706022  | 3,19E-01  | 5,72E-01 | 8,32E-01 | Gypc          | 0,97 | No  |
| ENSMUSG00000090533 | -8,10E-01 | -2,963247942 | 3,56E-01  | 5,51E-01 | 8,17E-01 | Gm8214        | 0,57 | No  |
| ENSMUSG00000090544 | 5,28E-02  | 4,506165279  | 4,36E-01  | 5,09E-01 | 7,92E-01 | Gm6576        | 1,04 | No  |
| ENSMUSG00000090547 | -1,89E+00 | -3,1076441   | 1,42E+00  | 2,33E-01 | 5,50E-01 | Gm8265        | 0,27 | No  |
| ENSMUSG00000090551 | 1,39E-01  | 2,399252448  | 1,06E+00  | 3,04E-01 | 6,01E-01 | A730015C16Rik | 1,10 | No  |
| ENSMUSG00000090553 | -1,47E-01 | 3,511784438  | 2,21E+00  | 1,37E-01 | 4,66E-01 | Snrpe         | 0,90 | No  |
| ENSMUSG00000090558 | -3,83E-02 | -3,107651936 | -7,91E-11 | 1,00E+00 | 1,00E+00 | Gm17202       | 0,97 | No  |
| ENSMUSG00000090559 | -5,87E-01 | -1,548231024 | 9,54E-01  | 3,29E-01 | 6,29E-01 | Gm17137       | 0,67 | No  |

|                    |           |              |           |          |          |               |      |     |
|--------------------|-----------|--------------|-----------|----------|----------|---------------|------|-----|
| ENSMUSG00000090561 | -1,11E-01 | -2,832003778 | 8,58E-03  | 9,26E-01 | 1,00E+00 | Gm17207       | 0,93 | No  |
| ENSMUSG00000090564 | 3,70E-02  | 3,182298208  | 1,17E-01  | 7,32E-01 | 9,22E-01 | A430057M04Rik | 1,03 | No  |
| ENSMUSG00000090565 | -4,70E-01 | -2,448699988 | 2,25E-01  | 6,35E-01 | 8,67E-01 | 4930405O22Rik | 0,72 | No  |
| ENSMUSG00000090570 | 1,45E-01  | 6,113629671  | 5,03E+00  | 2,49E-02 | 1,74E-01 | Gm17041       | 1,11 | No  |
| ENSMUSG00000090576 | -6,34E-01 | 1,293837353  | 1,10E+01  | 8,96E-04 | 1,48E-02 | Gm17055       | 0,64 | Yes |
| ENSMUSG00000090582 | 3,43E-01  | 2,952591773  | 9,18E+00  | 2,45E-03 | 3,29E-02 | Gm17024       | 1,27 | Yes |
| ENSMUSG00000090584 | 9,01E-03  | -3,107646452 | -5,16E-10 | 1,00E+00 | 1,00E+00 | Gm17169       | 1,01 | No  |
| ENSMUSG00000090588 | -2,65E+00 | -3,033633091 | 2,78E+00  | 9,55E-02 | 3,86E-01 | Gm9573        | 0,16 | No  |
| ENSMUSG00000090592 | -8,45E-01 | -2,963229433 | 3,92E-01  | 5,31E-01 | 8,05E-01 | Gm17571       | 0,56 | No  |
| ENSMUSG00000090594 | 9,01E-03  | -3,107646452 | -5,16E-10 | 1,00E+00 | 1,00E+00 | Gm3327        | 1,01 | No  |
| ENSMUSG00000090602 | -6,00E-02 | 3,878120026  | 4,32E-01  | 5,11E-01 | 7,94E-01 | Gm5611        | 0,96 | No  |
| ENSMUSG00000090607 | 2,00E-01  | 1,618529457  | 1,44E+00  | 2,30E-01 | 5,50E-01 | Gm17052       | 1,15 | No  |
| ENSMUSG00000090608 | 3,58E-02  | 0,908789981  | 2,76E-02  | 8,68E-01 | 1,00E+00 | Gm17200       | 1,03 | No  |
| ENSMUSG00000090610 | 2,65E-01  | 6,289358206  | 1,72E+01  | 3,32E-05 | 9,57E-04 | Gm3571        | 1,20 | Yes |
| ENSMUSG00000090622 | 2,35E-01  | -1,344470991 | 2,15E-01  | 6,43E-01 | 8,71E-01 | A930033H14Rik | 1,18 | No  |
| ENSMUSG00000090624 | 1,80E-01  | 2,010390358  | 1,49E+00  | 2,22E-01 | 5,50E-01 | Gm17060       | 1,13 | No  |
| ENSMUSG00000090625 | -6,35E-02 | 7,913417157  | 1,18E+00  | 2,77E-01 | 5,73E-01 | Gm20721       | 0,96 | No  |
| ENSMUSG00000090626 | 1,79E-01  | 2,593879525  | 2,03E+00  | 1,54E-01 | 4,97E-01 | Tex9          | 1,13 | No  |
| ENSMUSG00000090628 | -3,18E-01 | 3,286996557  | 8,61E+00  | 3,35E-03 | 4,16E-02 | Gm17083       | 0,80 | Yes |
| ENSMUSG00000090629 | 9,01E-03  | -3,107646452 | -5,16E-10 | 1,00E+00 | 1,00E+00 | Olfr180       | 1,01 | No  |
| ENSMUSG00000090631 | 1,87E+00  | -3,107639691 | 1,38E+00  | 2,40E-01 | 5,50E-01 | Olfr456       | 3,67 | No  |
| ENSMUSG00000090637 | -1,66E-01 | -1,300284595 | 1,06E-01  | 7,45E-01 | 9,29E-01 | Gm6189        | 0,89 | No  |
| ENSMUSG00000090639 | -1,49E-02 | 6,505247     | 5,66E-02  | 8,12E-01 | 9,67E-01 | Gm20425       | 0,99 | No  |
| ENSMUSG00000090641 | 7,70E-02  | -0,160650207 | 6,75E-02  | 7,95E-01 | 9,57E-01 | Zfp712        | 1,05 | No  |
| ENSMUSG00000090643 | -1,94E+00 | -3,107619243 | 1,50E+00  | 2,21E-01 | 5,50E-01 | Gm3453        | 0,26 | No  |
| ENSMUSG00000090655 | -1,87E+00 | -3,107637761 | 1,39E+00  | 2,38E-01 | 5,50E-01 | Vmn2r120      | 0,27 | No  |
| ENSMUSG00000090658 | -1,34E+00 | -2,600666454 | 1,13E+00  | 2,87E-01 | 5,83E-01 | Prss47        | 0,39 | No  |
| ENSMUSG00000090659 | 1,31E-01  | -0,460939821 | 1,50E-01  | 6,99E-01 | 9,04E-01 | Zfp493        | 1,10 | No  |
| ENSMUSG00000090665 | -5,22E-02 | -1,998007565 | 5,70E-03  | 9,40E-01 | 1,00E+00 | Gad1-ps       | 0,96 | No  |
| ENSMUSG00000090667 | 3,14E-02  | -3,107617333 | -7,69E-10 | 1,00E+00 | 1,00E+00 | Gm765         | 1,02 | No  |
| ENSMUSG00000090671 | 1,81E+00  | -3,10765737  | 1,28E+00  | 2,58E-01 | 5,50E-01 | Gm5067        | 3,49 | No  |
| ENSMUSG00000090673 | -4,20E-02 | 4,098874082  | 2,27E-01  | 6,33E-01 | 8,65E-01 | Gm340         | 0,97 | No  |

|                    |           |              |           |          |          |               |      |     |
|--------------------|-----------|--------------|-----------|----------|----------|---------------|------|-----|
| ENSMUSG00000090674 | 1,08E-01  | 2,27166099   | 5,96E-01  | 4,40E-01 | 7,32E-01 | Gm17082       | 1,08 | No  |
| ENSMUSG00000090675 | 2,90E-01  | 4,179685945  | 1,17E+01  | 6,27E-04 | 1,11E-02 | Olfr111       | 1,22 | Yes |
| ENSMUSG00000090682 | -5,49E-01 | -2,77061303  | 2,36E-01  | 6,27E-01 | 8,61E-01 | Gm3852        | 0,68 | No  |
| ENSMUSG00000090685 | -3,75E-01 | -1,963272124 | 3,27E-01  | 5,68E-01 | 8,29E-01 | Gm9047        | 0,77 | No  |
| ENSMUSG00000090691 | 1,81E+00  | -3,10765737  | 1,28E+00  | 2,58E-01 | 5,50E-01 | Gm3667        | 3,49 | No  |
| ENSMUSG00000090693 | 4,12E-01  | -2,08875373  | 3,21E-01  | 5,71E-01 | 8,31E-01 | Trim43a       | 1,33 | No  |
| ENSMUSG00000090698 | 7,68E-01  | -1,539872596 | 2,00E+00  | 1,58E-01 | 5,03E-01 | Apold1        | 1,70 | No  |
| ENSMUSG00000090700 | -1,89E+00 | -3,1076441   | 1,42E+00  | 2,33E-01 | 5,50E-01 | Cyp4f40       | 0,27 | No  |
| ENSMUSG00000090704 | -2,33E-01 | 1,530616109  | 1,82E+00  | 1,77E-01 | 5,37E-01 | Trp53-ps      | 0,85 | No  |
| ENSMUSG00000090706 | -7,76E-02 | 2,866781529  | 4,26E-01  | 5,14E-01 | 7,96E-01 | Gm17233       | 0,95 | No  |
| ENSMUSG00000090707 | 3,14E-02  | -3,107617333 | -7,69E-10 | 1,00E+00 | 1,00E+00 | Gm8237        | 1,02 | No  |
| ENSMUSG00000090708 | -2,82E-02 | -2,998016153 | 3,30E-04  | 9,85E-01 | 1,00E+00 | Gm17196       | 0,98 | No  |
| ENSMUSG00000090709 | 1,67E+00  | -1,755764948 | 6,14E+00  | 1,32E-02 | 1,15E-01 | Gm17173       | 3,18 | No  |
| ENSMUSG00000090722 | -1,17E+00 | -2,289509517 | 2,01E+00  | 1,56E-01 | 5,01E-01 | Gm8378        | 0,44 | No  |
| ENSMUSG00000090724 | -2,37E+00 | -3,033637257 | 2,19E+00  | 1,39E-01 | 4,70E-01 | 4930542C12Rik | 0,19 | No  |
| ENSMUSG00000090733 | -3,30E-01 | 2,246903844  | 5,72E+00  | 1,67E-02 | 1,35E-01 | Rps27         | 0,80 | No  |
| ENSMUSG00000090737 | 5,41E-02  | 5,036322327  | 5,37E-01  | 4,64E-01 | 7,52E-01 | Gm6788        | 1,04 | No  |
| ENSMUSG00000090753 | -7,01E-01 | 0,878660519  | 1,01E+01  | 1,46E-03 | 2,19E-02 | Rpl31-ps4     | 0,62 | Yes |
| ENSMUSG00000090758 | 5,70E-02  | 2,716550215  | 2,16E-01  | 6,42E-01 | 8,71E-01 | Gm17178       | 1,04 | No  |
| ENSMUSG00000090761 | 1,24E-03  | 3,618630816  | 1,67E-04  | 9,90E-01 | 1,00E+00 | Gm17201       | 1,00 | No  |
| ENSMUSG00000090777 | 1,26E+00  | -2,770557917 | 9,87E-01  | 3,21E-01 | 6,21E-01 | Ccdc188       | 2,40 | No  |
| ENSMUSG00000090778 | 1,65E+00  | -2,832030937 | 1,87E+00  | 1,72E-01 | 5,28E-01 | Gm3235        | 3,13 | No  |
| ENSMUSG00000090779 | -1,16E+00 | -3,033618711 | 5,90E-01  | 4,42E-01 | 7,34E-01 | Gm17110       | 0,45 | No  |
| ENSMUSG00000090785 | -2,72E+00 | -2,831981503 | 2,93E+00  | 8,68E-02 | 3,78E-01 | Gm17116       | 0,15 | No  |
| ENSMUSG00000090790 | 7,21E-02  | 1,470824599  | 1,65E-01  | 6,84E-01 | 8,96E-01 | Gm17377       | 1,05 | No  |
| ENSMUSG00000090799 | 4,41E-01  | -1,070347485 | 9,18E-01  | 3,38E-01 | 6,38E-01 | Klhl33        | 1,36 | No  |
| ENSMUSG00000090812 | 3,25E-01  | -0,785840374 | 6,49E-01  | 4,21E-01 | 7,16E-01 | Samd15        | 1,25 | No  |
| ENSMUSG00000090824 | -1,22E+00 | -3,070158313 | 7,06E-01  | 4,01E-01 | 6,99E-01 | Olfr1344      | 0,43 | No  |
| ENSMUSG00000090840 | 5,23E-01  | -2,268194323 | 4,97E-01  | 4,81E-01 | 7,68E-01 | 1700092M07Rik | 1,44 | No  |
| ENSMUSG00000090841 | -1,81E-01 | 6,415347611  | 8,29E+00  | 4,00E-03 | 4,73E-02 | Myl6          | 0,88 | Yes |
| ENSMUSG00000090843 | -8,57E-01 | -2,963247565 | 4,04E-01  | 5,25E-01 | 8,02E-01 | Heatr4        | 0,55 | No  |
| ENSMUSG00000090853 | 1,48E-01  | 0,070719809  | 2,67E-01  | 6,05E-01 | 8,49E-01 | Gm17364       | 1,11 | No  |



|                    |           |              |           |          |          |               |      |     |
|--------------------|-----------|--------------|-----------|----------|----------|---------------|------|-----|
| ENSMUSG00000090855 | 1,87E+00  | -3,107639691 | 1,38E+00  | 2,40E-01 | 5,50E-01 | Gm17219       | 3,67 | No  |
| ENSMUSG00000090860 | 2,07E-02  | 4,490633026  | 6,61E-02  | 7,97E-01 | 9,58E-01 | Gm17134       | 1,01 | No  |
| ENSMUSG00000090861 | -7,73E-02 | 0,4582385    | 9,98E-02  | 7,52E-01 | 9,32E-01 | Arf4os        | 0,95 | No  |
| ENSMUSG00000090862 | -1,60E-01 | 4,07187207   | 3,35E+00  | 6,70E-02 | 3,26E-01 | Rps13         | 0,89 | No  |
| ENSMUSG00000090863 | 3,21E-01  | -0,497821318 | 7,68E-01  | 3,81E-01 | 6,82E-01 | A530084C06Rik | 1,25 | No  |
| ENSMUSG00000090873 | 4,33E-02  | 0,961959344  | 4,26E-02  | 8,36E-01 | 9,81E-01 | Gm17112       | 1,03 | No  |
| ENSMUSG00000090874 | 1,81E+00  | -3,10765737  | 1,28E+00  | 2,58E-01 | 5,50E-01 | Olfr733       | 3,49 | No  |
| ENSMUSG00000090877 | -2,35E-01 | 1,353672894  | 1,76E+00  | 1,85E-01 | 5,49E-01 | Hspa1b        | 0,85 | No  |
| ENSMUSG00000090881 | 8,99E-02  | -1,015608333 | 3,87E-02  | 8,44E-01 | 9,86E-01 | Gm6904        | 1,06 | No  |
| ENSMUSG00000090891 | -4,03E-01 | -1,47290265  | 5,09E-01  | 4,76E-01 | 7,64E-01 | D6Ertd527e    | 0,76 | No  |
| ENSMUSG00000090894 | 3,47E-01  | 2,108999858  | 5,72E+00  | 1,68E-02 | 1,35E-01 | Olfr110       | 1,27 | No  |
| ENSMUSG00000090925 | -4,40E-01 | -2,333156532 | 2,77E-01  | 5,99E-01 | 8,46E-01 | 1810064F22Rik | 0,74 | No  |
| ENSMUSG00000090935 | 4,14E-02  | 4,85847094   | 3,02E-01  | 5,83E-01 | 8,38E-01 | Synj2bp       | 1,03 | No  |
| ENSMUSG00000090936 | 1,88E-01  | 0,273796772  | 5,24E-01  | 4,69E-01 | 7,58E-01 | Gm17705       | 1,14 | No  |
| ENSMUSG00000090939 | 2,00E-01  | 0,014991105  | 4,45E-01  | 5,05E-01 | 7,89E-01 | Gm17147       | 1,15 | No  |
| ENSMUSG00000090941 | 1,81E+00  | -3,10765737  | 1,28E+00  | 2,58E-01 | 5,50E-01 | Gm17212       | 3,49 | No  |
| ENSMUSG00000090942 | 5,40E-01  | 1,961043475  | 1,17E+01  | 6,39E-04 | 1,12E-02 | F830016B08Rik | 1,45 | Yes |
| ENSMUSG00000090946 | 1,09E-01  | 7,47613353   | 3,36E+00  | 6,69E-02 | 3,26E-01 | Ccdc71l       | 1,08 | No  |
| ENSMUSG00000090951 | 3,14E-02  | -3,107617333 | -7,69E-10 | 1,00E+00 | 1,00E+00 | Olfr181       | 1,02 | No  |
| ENSMUSG00000090952 | 3,10E-02  | 1,445293827  | 2,98E-02  | 8,63E-01 | 9,97E-01 | Gm17251       | 1,02 | No  |
| ENSMUSG00000090955 | -2,18E+00 | -2,185560953 | 6,11E+00  | 1,34E-02 | 1,16E-01 | Gm17097       | 0,22 | No  |
| ENSMUSG00000090957 | 4,84E-02  | 5,38907187   | 4,77E-01  | 4,90E-01 | 7,76E-01 | Gm7535        | 1,03 | No  |
| ENSMUSG00000090958 | 2,34E-01  | 5,029901071  | 9,81E+00  | 1,73E-03 | 2,49E-02 | Lrrc32        | 1,18 | Yes |
| ENSMUSG00000090963 | 1,27E-01  | 1,363405856  | 5,18E-01  | 4,72E-01 | 7,60E-01 | Gm17655       | 1,09 | No  |
| ENSMUSG00000090964 | -1,06E-01 | 0,032505811  | 1,36E-01  | 7,12E-01 | 9,11E-01 | Gm17206       | 0,93 | No  |
| ENSMUSG00000090965 | -1,71E+00 | -2,448640864 | 3,21E+00  | 7,30E-02 | 3,43E-01 | Gm17203       | 0,31 | No  |
| ENSMUSG00000090968 | -8,48E-01 | -2,832006653 | 3,94E-01  | 5,30E-01 | 8,05E-01 | Gm3978        | 0,56 | No  |
| ENSMUSG00000090994 | 1,89E-01  | -0,485412238 | 2,72E-01  | 6,02E-01 | 8,48E-01 | Gm6153        | 1,14 | No  |
| ENSMUSG00000090996 | -1,33E-01 | 3,405384322  | 1,71E+00  | 1,91E-01 | 5,50E-01 | Gm20458       | 0,91 | No  |
| ENSMUSG00000091003 | -3,03E-01 | -1,311017964 | 3,96E-01  | 5,29E-01 | 8,05E-01 | Gm7244        | 0,81 | No  |
| ENSMUSG00000091004 | -5,33E-02 | 5,14982965   | 5,42E-01  | 4,62E-01 | 7,50E-01 | Gm6872        | 0,96 | No  |
| ENSMUSG00000091006 | -3,83E-02 | -3,107651936 | -7,91E-11 | 1,00E+00 | 1,00E+00 | Vmn2r69       | 0,97 | No  |

|                    |           |              |          |          |          |               |      |    |
|--------------------|-----------|--------------|----------|----------|----------|---------------|------|----|
| ENSMUSG00000091007 | -7,77E-01 | -2,185565215 | 1,05E+00 | 3,05E-01 | 6,01E-01 | D630036H23Rik | 0,58 | No |
| ENSMUSG00000091014 | 1,17E+00  | -2,185701313 | 2,32E+00 | 1,28E-01 | 4,48E-01 | Gm5244        | 2,25 | No |
| ENSMUSG00000091017 | -5,35E-01 | -0,997773557 | 1,32E+00 | 2,50E-01 | 5,50E-01 | Fam71a        | 0,69 | No |
| ENSMUSG00000091019 | 1,28E+00  | -2,832001446 | 1,02E+00 | 3,13E-01 | 6,13E-01 | Gm7502        | 2,43 | No |
| ENSMUSG00000091020 | -9,66E-02 | 4,421505463  | 1,40E+00 | 2,37E-01 | 5,50E-01 | Gm5828        | 0,94 | No |
| ENSMUSG00000091021 | -2,40E-01 | 2,165375003  | 2,79E+00 | 9,51E-02 | 3,86E-01 | Gm17300       | 0,85 | No |
| ENSMUSG00000091028 | -6,61E-01 | -2,070106908 | 9,94E-01 | 3,19E-01 | 6,19E-01 | Gm10722       | 0,63 | No |
| ENSMUSG00000091037 | -5,48E-02 | 1,745852118  | 1,11E-01 | 7,39E-01 | 9,26E-01 | Gm17661       | 0,96 | No |
| ENSMUSG00000091040 | -7,48E-01 | -2,355623038 | 6,26E-01 | 4,29E-01 | 7,23E-01 | Gm9359        | 0,60 | No |
| ENSMUSG00000091043 | -1,87E+00 | -3,107637761 | 1,39E+00 | 2,38E-01 | 5,50E-01 | Glyat13       | 0,27 | No |
| ENSMUSG00000091050 | -1,02E-01 | 1,19729201   | 2,50E-01 | 6,17E-01 | 8,55E-01 | 9330020H09Rik | 0,93 | No |
| ENSMUSG00000091055 | -7,77E-02 | -2,896170175 | 2,63E-03 | 9,59E-01 | 1,00E+00 | Siglec15      | 0,95 | No |
| ENSMUSG00000091058 | 1,16E-01  | 3,125981971  | 1,14E+00 | 2,85E-01 | 5,81E-01 | Gm17538       | 1,08 | No |
| ENSMUSG00000091060 | -1,87E+00 | -3,107637761 | 1,39E+00 | 2,38E-01 | 5,50E-01 | 7420461P10Rik | 0,27 | No |
| ENSMUSG00000091071 | -7,89E-01 | -1,755623295 | 1,55E+00 | 2,13E-01 | 5,50E-01 | 1700030C10Rik | 0,58 | No |
| ENSMUSG00000091078 | -8,61E-02 | -2,831986117 | 5,11E-03 | 9,43E-01 | 1,00E+00 | Gm17218       | 0,94 | No |
| ENSMUSG00000091083 | -1,57E-02 | 0,621928898  | 4,20E-03 | 9,48E-01 | 1,00E+00 | Gm4535        | 0,99 | No |
| ENSMUSG00000091086 | -1,63E-01 | 7,459017093  | 7,53E+00 | 6,06E-03 | 6,47E-02 | Rpl6l         | 0,89 | No |
| ENSMUSG00000091089 | 1,40E-01  | -1,033798947 | 9,87E-02 | 7,53E-01 | 9,33E-01 | A930018M24Rik | 1,10 | No |
| ENSMUSG00000091091 | 1,36E+00  | -2,448694894 | 1,90E+00 | 1,68E-01 | 5,22E-01 | Kcnmb3        | 2,57 | No |
| ENSMUSG00000091096 | -2,71E+00 | -3,033620915 | 2,92E+00 | 8,75E-02 | 3,78E-01 | Gm17304       | 0,15 | No |
| ENSMUSG00000091102 | 8,75E-02  | 2,873477267  | 5,58E-01 | 4,55E-01 | 7,45E-01 | 5830462I19Rik | 1,06 | No |
| ENSMUSG00000091105 | -7,00E-02 | 3,136125017  | 4,10E-01 | 5,22E-01 | 8,00E-01 | Mrto4-ps2     | 0,95 | No |
| ENSMUSG00000091109 | -9,16E-01 | -1,460669473 | 3,26E+00 | 7,10E-02 | 3,37E-01 | Gm17622       | 0,53 | No |
| ENSMUSG00000091117 | 1,25E+00  | -2,83203723  | 9,70E-01 | 3,25E-01 | 6,25E-01 | Gm9064        | 2,38 | No |
| ENSMUSG00000091119 | 4,49E-01  | -1,614229182 | 6,11E-01 | 4,35E-01 | 7,27E-01 | Ccdc152       | 1,36 | No |
| ENSMUSG00000091123 | -2,68E+00 | -3,033645766 | 2,84E+00 | 9,17E-02 | 3,82E-01 | Gm17181       | 0,16 | No |
| ENSMUSG00000091133 | 1,47E-01  | 2,618944299  | 1,35E+00 | 2,44E-01 | 5,50E-01 | Gm17108       | 1,11 | No |
| ENSMUSG00000091135 | 4,57E-01  | -2,333224391 | 2,84E-01 | 5,94E-01 | 8,43E-01 | Lgals1-ps2    | 1,37 | No |
| ENSMUSG00000091144 | -2,27E-01 | 2,54601161   | 3,38E+00 | 6,60E-02 | 3,23E-01 | Phf11c        | 0,85 | No |
| ENSMUSG00000091149 | 4,74E-01  | -2,832035341 | 1,77E-01 | 6,74E-01 | 8,90E-01 | Gm17020       | 1,39 | No |
| ENSMUSG00000091154 | 4,73E-02  | 0,458180653  | 3,46E-02 | 8,53E-01 | 9,91E-01 | Proscos       | 1,03 | No |

|                    |           |              |           |          |          |          |      |     |
|--------------------|-----------|--------------|-----------|----------|----------|----------|------|-----|
| ENSMUSG00000091155 | 3,18E-01  | -1,289505712 | 4,05E-01  | 5,25E-01 | 8,02E-01 | Serpine3 | 1,25 | No  |
| ENSMUSG00000091159 | 1,18E+00  | -1,998063462 | 2,36E+00  | 1,24E-01 | 4,41E-01 | Gm17545  | 2,27 | No  |
| ENSMUSG00000091160 | 3,08E-02  | 1,533113803  | 3,11E-02  | 8,60E-01 | 9,95E-01 | Gm17133  | 1,02 | No  |
| ENSMUSG00000091163 | 1,86E+00  | -2,963277112 | 1,35E+00  | 2,46E-01 | 5,50E-01 | Gm3962   | 3,62 | No  |
| ENSMUSG00000091165 | 1,71E-01  | 0,702419225  | 5,31E-01  | 4,66E-01 | 7,55E-01 | Gm17036  | 1,13 | No  |
| ENSMUSG00000091172 | -6,02E-01 | -2,432883844 | 4,93E-01  | 4,82E-01 | 7,70E-01 | Gm17120  | 0,66 | No  |
| ENSMUSG00000091177 | 2,99E-02  | -1,510034624 | 2,82E-03  | 9,58E-01 | 1,00E+00 | Gm15494  | 1,02 | No  |
| ENSMUSG00000091183 | 3,78E-02  | 0,950490865  | 3,42E-02  | 8,53E-01 | 9,91E-01 | Gm5141   | 1,03 | No  |
| ENSMUSG00000091184 | -2,63E-02 | -3,033641358 | 2,33E-04  | 9,88E-01 | 1,00E+00 | Gm17059  | 0,98 | No  |
| ENSMUSG00000091189 | -7,38E-02 | -3,033634644 | 2,66E-03  | 9,59E-01 | 1,00E+00 | Ear-ps3  | 0,95 | No  |
| ENSMUSG00000091191 | -4,96E-01 | -0,378320162 | 2,28E+00  | 1,31E-01 | 4,55E-01 | Gm17334  | 0,71 | No  |
| ENSMUSG00000091192 | -6,64E-02 | -2,863727919 | 2,48E-03  | 9,60E-01 | 1,00E+00 | Sardhos  | 0,96 | No  |
| ENSMUSG00000091194 | -2,71E+00 | -2,963182239 | 2,92E+00  | 8,75E-02 | 3,78E-01 | Gm19840  | 0,15 | No  |
| ENSMUSG00000091198 | 7,62E-01  | -2,831967678 | 3,15E-01  | 5,74E-01 | 8,34E-01 | Gm5218   | 1,70 | No  |
| ENSMUSG00000091199 | 6,45E-02  | 0,302378309  | 6,08E-02  | 8,05E-01 | 9,63E-01 | Gm2619   | 1,05 | No  |
| ENSMUSG00000091204 | 3,14E-02  | -3,107617333 | -7,69E-10 | 1,00E+00 | 1,00E+00 | Gm7271   | 1,02 | No  |
| ENSMUSG00000091215 | 1,87E+00  | -3,033632735 | 1,36E+00  | 2,43E-01 | 5,50E-01 | Pate1    | 3,66 | No  |
| ENSMUSG00000091216 | -1,89E+00 | -3,1076441   | 1,42E+00  | 2,33E-01 | 5,50E-01 | Gm17208  | 0,27 | No  |
| ENSMUSG00000091223 | -1,06E-01 | 3,170453817  | 9,56E-01  | 3,28E-01 | 6,29E-01 | Gm8775   | 0,93 | No  |
| ENSMUSG00000091228 | -2,01E-02 | 5,564637041  | 8,60E-02  | 7,69E-01 | 9,42E-01 | Gm20390  | 0,99 | No  |
| ENSMUSG00000091230 | -1,18E+00 | -2,355512396 | 1,81E+00  | 1,79E-01 | 5,40E-01 | Gm6970   | 0,44 | No  |
| ENSMUSG00000091237 | 6,86E-01  | -2,628211125 | 3,69E-01  | 5,43E-01 | 8,12E-01 | Gm17114  | 1,61 | No  |
| ENSMUSG00000091238 | -5,34E-01 | 1,709503399  | 1,12E+01  | 7,98E-04 | 1,34E-02 | Gm17103  | 0,69 | Yes |
| ENSMUSG00000091243 | -2,73E-01 | -1,600718011 | 2,79E-01  | 5,97E-01 | 8,45E-01 | Vgll3    | 0,83 | No  |
| ENSMUSG00000091264 | 2,17E-01  | 4,720904102  | 7,78E+00  | 5,29E-03 | 5,82E-02 | Smim13   | 1,16 | No  |
| ENSMUSG00000091269 | 2,01E-02  | 7,050784538  | 1,10E-01  | 7,40E-01 | 9,26E-01 | Gm6682   | 1,01 | No  |
| ENSMUSG00000091272 | -3,22E-01 | -1,912628147 | 3,03E-01  | 5,82E-01 | 8,38E-01 | Gm17641  | 0,80 | No  |
| ENSMUSG00000091275 | -1,87E+00 | -3,107637761 | 1,39E+00  | 2,38E-01 | 5,50E-01 | Gm3248   | 0,27 | No  |
| ENSMUSG00000091277 | -9,26E-02 | 3,441634512  | 8,25E-01  | 3,64E-01 | 6,65E-01 | Gm1818   | 0,94 | No  |
| ENSMUSG00000091285 | 1,87E+00  | -3,033632735 | 1,36E+00  | 2,43E-01 | 5,50E-01 | Gm17430  | 3,66 | No  |
| ENSMUSG00000091293 | 5,83E-02  | 1,549973658  | 1,11E-01  | 7,39E-01 | 9,26E-01 | Gm6047   | 1,04 | No  |
| ENSMUSG00000091306 | -7,92E-02 | 2,342345768  | 3,37E-01  | 5,62E-01 | 8,25E-01 | Gm17606  | 0,95 | No  |

|                    |           |              |          |          |          |               |      |     |
|--------------------|-----------|--------------|----------|----------|----------|---------------|------|-----|
| ENSMUSG00000091311 | -9,32E-01 | 0,69466299   | 1,73E+01 | 3,22E-05 | 9,32E-04 | Spata31d1b    | 0,52 | Yes |
| ENSMUSG00000091313 | -3,23E-01 | -0,497599895 | 7,40E-01 | 3,90E-01 | 6,90E-01 | Fth-ps2       | 0,80 | No  |
| ENSMUSG00000091315 | -8,93E-02 | -2,96327978  | 3,63E-03 | 9,52E-01 | 1,00E+00 | Gm17214       | 0,94 | No  |
| ENSMUSG00000091329 | 1,81E+00  | -3,10765737  | 1,28E+00 | 2,58E-01 | 5,50E-01 | 1700112D23Rik | 3,49 | No  |
| ENSMUSG00000091337 | 1,01E-01  | 5,746490544  | 2,25E+00 | 1,34E-01 | 4,61E-01 | Eid1          | 1,07 | No  |
| ENSMUSG00000091345 | -1,24E+00 | -2,497641342 | 1,47E+00 | 2,25E-01 | 5,50E-01 | Col6a5        | 0,42 | No  |
| ENSMUSG00000091351 | 4,96E-01  | -2,770576793 | 1,93E-01 | 6,60E-01 | 8,82E-01 | Gm17135       | 1,41 | No  |
| ENSMUSG00000091358 | -1,60E-02 | -1,322047043 | 1,03E-03 | 9,74E-01 | 1,00E+00 | Speer5-ps1    | 0,99 | No  |
| ENSMUSG00000091363 | 3,40E-03  | 5,126463971  | 2,18E-03 | 9,63E-01 | 1,00E+00 | Gm7701        | 1,00 | No  |
| ENSMUSG00000091366 | -2,61E-02 | 3,963801996  | 8,58E-02 | 7,70E-01 | 9,42E-01 | Gm17040       | 0,98 | No  |
| ENSMUSG00000091367 | 9,91E-02  | 3,849694588  | 1,17E+00 | 2,80E-01 | 5,77E-01 | Gm17711       | 1,07 | No  |
| ENSMUSG00000091370 | -3,27E-01 | -1,033800309 | 5,97E-01 | 4,40E-01 | 7,32E-01 | 5730435O14Rik | 0,80 | No  |
| ENSMUSG00000091373 | 3,17E+00  | -2,896124898 | 4,11E+00 | 4,25E-02 | 2,45E-01 | Gm8810        | 9,03 | No  |
| ENSMUSG00000091378 | -1,95E+00 | -3,033628749 | 1,50E+00 | 2,21E-01 | 5,50E-01 | Gm4219        | 0,26 | No  |
| ENSMUSG00000091381 | 1,81E+00  | -3,10765737  | 1,28E+00 | 2,58E-01 | 5,50E-01 | Vmn2r83       | 3,49 | No  |
| ENSMUSG00000091383 | -5,09E-01 | -0,954600427 | 1,34E+00 | 2,48E-01 | 5,50E-01 | Hist1h2al     | 0,70 | No  |
| ENSMUSG00000091387 | -1,36E-01 | 1,240743342  | 5,18E-01 | 4,72E-01 | 7,60E-01 | Gcnt4         | 0,91 | No  |
| ENSMUSG00000091390 | -1,67E-02 | -1,401358347 | 1,03E-03 | 9,74E-01 | 1,00E+00 | Gm17168       | 0,99 | No  |
| ENSMUSG00000091393 | -1,23E+00 | -3,146117124 | 7,12E-01 | 3,99E-01 | 6,98E-01 | 5330438I03Rik | 0,42 | No  |
| ENSMUSG00000091401 | -8,05E-01 | -2,333187315 | 8,36E-01 | 3,61E-01 | 6,62E-01 | Gm9252        | 0,57 | No  |
| ENSMUSG00000091405 | 2,23E-02  | -1,40136516  | 2,05E-03 | 9,64E-01 | 1,00E+00 | Hist2h4       | 1,02 | No  |
| ENSMUSG00000091408 | -9,89E-02 | 1,773912583  | 3,88E-01 | 5,33E-01 | 8,06E-01 | Gm6728        | 0,93 | No  |
| ENSMUSG00000091410 | -8,45E-02 | -2,600704678 | 6,49E-03 | 9,36E-01 | 1,00E+00 | Gm17150       | 0,94 | No  |
| ENSMUSG00000091412 | -2,17E-01 | 1,336101365  | 1,39E+00 | 2,38E-01 | 5,50E-01 | Gm2895        | 0,86 | No  |
| ENSMUSG00000091415 | -8,55E-01 | -2,831982673 | 4,01E-01 | 5,27E-01 | 8,03E-01 | Ak9           | 0,55 | No  |
| ENSMUSG00000091419 | -2,38E-01 | -1,896133    | 1,25E-01 | 7,23E-01 | 9,17E-01 | Gm17450       | 0,85 | No  |
| ENSMUSG00000091421 | 4,36E-02  | 7,589966469  | 5,46E-01 | 4,60E-01 | 7,49E-01 | Gm4202        | 1,03 | No  |
| ENSMUSG00000091423 | -1,07E-01 | 4,325428465  | 1,63E+00 | 2,01E-01 | 5,50E-01 | Gm17509       | 0,93 | No  |
| ENSMUSG00000091426 | 7,24E-01  | -2,896120915 | 2,86E-01 | 5,93E-01 | 8,42E-01 | Gm17228       | 1,65 | No  |
| ENSMUSG00000091438 | 3,22E-01  | -0,697409902 | 7,41E-01 | 3,89E-01 | 6,90E-01 | Gm17088       | 1,25 | No  |
| ENSMUSG00000091442 | -5,64E-01 | 0,819874235  | 6,12E+00 | 1,34E-02 | 1,16E-01 | Gm17031       | 0,68 | No  |
| ENSMUSG00000091443 | 1,05E-01  | 1,107854375  | 2,64E-01 | 6,07E-01 | 8,50E-01 | Gm17023       | 1,08 | No  |

|                    |           |              |           |          |          |               |      |     |
|--------------------|-----------|--------------|-----------|----------|----------|---------------|------|-----|
| ENSMUSG00000091449 | -2,33E-01 | 6,463774355  | 1,37E+01  | 2,14E-04 | 4,59E-03 | Gm10269       | 0,85 | Yes |
| ENSMUSG00000091455 | -1,33E+00 | -2,896140992 | 1,10E+00  | 2,93E-01 | 5,89E-01 | Otogl         | 0,40 | No  |
| ENSMUSG00000091460 | -1,47E-01 | 3,986685105  | 2,75E+00  | 9,75E-02 | 3,90E-01 | Gm7808        | 0,90 | No  |
| ENSMUSG00000091462 | 8,83E-02  | 1,912289857  | 3,25E-01  | 5,68E-01 | 8,30E-01 | Gm17084       | 1,06 | No  |
| ENSMUSG00000091471 | 1,01E-01  | 3,582428974  | 1,05E+00  | 3,06E-01 | 6,03E-01 | Gm20538       | 1,07 | No  |
| ENSMUSG00000091472 | 2,93E-01  | -2,711739882 | 8,72E-02  | 7,68E-01 | 9,41E-01 | Gm3739        | 1,23 | No  |
| ENSMUSG00000091474 | 2,05E-01  | 2,728248498  | 2,97E+00  | 8,49E-02 | 3,74E-01 | 2610021A01Rik | 1,15 | No  |
| ENSMUSG00000091475 | 7,07E-01  | -2,963242697 | 2,70E-01  | 6,03E-01 | 8,48E-01 | 2810468N07Rik | 1,63 | No  |
| ENSMUSG00000091476 | 3,83E-01  | -1,401437123 | 5,59E-01  | 4,55E-01 | 7,44E-01 | Gm16432       | 1,30 | No  |
| ENSMUSG00000091478 | 5,57E-02  | 6,676589975  | 8,08E-01  | 3,69E-01 | 6,70E-01 | Gm10039       | 1,04 | No  |
| ENSMUSG00000091479 | -6,98E-02 | 3,759829993  | 5,60E-01  | 4,54E-01 | 7,44E-01 | Gm17035       | 0,95 | No  |
| ENSMUSG00000091492 | 8,12E-01  | -1,185729755 | 2,58E+00  | 1,08E-01 | 4,03E-01 | Gm17025       | 1,76 | No  |
| ENSMUSG00000091496 | -3,97E-02 | -2,896148553 | 8,68E-04  | 9,76E-01 | 1,00E+00 | Gm8398        | 0,97 | No  |
| ENSMUSG00000091498 | 4,28E-02  | 6,377749958  | 4,54E-01  | 5,00E-01 | 7,85E-01 | Mpc1-ps       | 1,03 | No  |
| ENSMUSG00000091507 | -3,15E-01 | -0,107409548 | 1,12E+00  | 2,91E-01 | 5,86E-01 | Gm17194       | 0,80 | No  |
| ENSMUSG00000091509 | -1,42E-01 | 2,751442753  | 1,44E+00  | 2,30E-01 | 5,50E-01 | Gm17066       | 0,91 | No  |
| ENSMUSG00000091510 | 1,19E+00  | -3,033638016 | 6,66E-01  | 4,14E-01 | 7,10E-01 | Mtag2         | 2,29 | No  |
| ENSMUSG00000091512 | 1,51E-01  | 5,904015208  | 5,24E+00  | 2,21E-02 | 1,61E-01 | Lamtor3       | 1,11 | No  |
| ENSMUSG00000091514 | 9,26E-03  | 2,307823222  | 4,58E-03  | 9,46E-01 | 1,00E+00 | Gm17484       | 1,01 | No  |
| ENSMUSG00000091515 | 7,23E-01  | -1,107643864 | 2,70E+00  | 1,00E-01 | 3,92E-01 | Zfp422-ps     | 1,65 | No  |
| ENSMUSG00000091523 | -1,00E+00 | -1,929151045 | 1,89E+00  | 1,69E-01 | 5,23E-01 | AU040972      | 0,50 | No  |
| ENSMUSG00000091530 | 2,42E-01  | -0,785803094 | 3,33E-01  | 5,64E-01 | 8,27E-01 | Cldn20        | 1,18 | No  |
| ENSMUSG00000091531 | -1,92E+00 | -3,033623267 | 1,46E+00  | 2,27E-01 | 5,50E-01 | Olf102        | 0,26 | No  |
| ENSMUSG00000091534 | 8,15E-02  | 0,010631834  | 8,06E-02  | 7,76E-01 | 9,46E-01 | Gm17195       | 1,06 | No  |
| ENSMUSG00000091537 | -5,41E-02 | 4,887530986  | 5,19E-01  | 4,71E-01 | 7,60E-01 | Tma7          | 0,96 | No  |
| ENSMUSG00000091542 | -3,83E-02 | -3,107651936 | -7,91E-11 | 1,00E+00 | 1,00E+00 | Gm17167       | 0,97 | No  |
| ENSMUSG00000091549 | -1,44E-01 | 7,039407801  | 5,66E+00  | 1,73E-02 | 1,37E-01 | Gm6548        | 0,91 | No  |
| ENSMUSG00000091558 | 1,55E+00  | -2,40147532  | 2,62E+00  | 1,06E-01 | 3,98E-01 | Gm17227       | 2,93 | No  |
| ENSMUSG00000091561 | -5,29E-01 | 3,458062595  | 2,80E+01  | 1,24E-07 | 6,77E-06 | Gm6665        | 0,69 | Yes |
| ENSMUSG00000091562 | 3,72E-02  | 4,704146026  | 2,28E-01  | 6,33E-01 | 8,65E-01 | Crybg3        | 1,03 | No  |
| ENSMUSG00000091568 | 1,23E+00  | -2,7706003   | 9,36E-01  | 3,33E-01 | 6,34E-01 | Gm8206        | 2,34 | No  |
| ENSMUSG00000091570 | 8,21E-02  | 2,314320557  | 3,70E-01  | 5,43E-01 | 8,12E-01 | Gm7707        | 1,06 | No  |

|                    |           |              |          |          |          |               |      |     |
|--------------------|-----------|--------------|----------|----------|----------|---------------|------|-----|
| ENSMUSG00000091572 | 2,62E+00  | -3,033654625 | 2,66E+00 | 1,03E-01 | 3,95E-01 | Vmn2r3        | 6,16 | No  |
| ENSMUSG00000091573 | -2,03E+00 | -2,711616965 | 3,13E+00 | 7,71E-02 | 3,54E-01 | Serpina3d-ps  | 0,24 | No  |
| ENSMUSG00000091575 | -5,11E-02 | 1,9743215    | 1,19E-01 | 7,30E-01 | 9,21E-01 | 2010016l18Rik | 0,97 | No  |
| ENSMUSG00000091577 | -6,98E-02 | 0,824580046  | 9,84E-02 | 7,54E-01 | 9,33E-01 | Gm6211        | 0,95 | No  |
| ENSMUSG00000091580 | -3,62E-02 | 5,250873483  | 2,55E-01 | 6,13E-01 | 8,53E-01 | Gm6467        | 0,98 | No  |
| ENSMUSG00000091586 | -1,54E-01 | 1,411499655  | 7,04E-01 | 4,01E-01 | 7,00E-01 | Cyp4f17       | 0,90 | No  |
| ENSMUSG00000091587 | -1,87E+00 | -3,107637761 | 1,39E+00 | 2,38E-01 | 5,50E-01 | Gm17191       | 0,27 | No  |
| ENSMUSG00000091594 | -1,87E+00 | -3,107637761 | 1,39E+00 | 2,38E-01 | 5,50E-01 | Gm17067       | 0,27 | No  |
| ENSMUSG00000091604 | 8,57E-03  | 0,148152483  | 9,45E-04 | 9,75E-01 | 1,00E+00 | Gm17349       | 1,01 | No  |
| ENSMUSG00000091613 | 4,74E-02  | 4,840031639  | 3,83E-01 | 5,36E-01 | 8,08E-01 | Gm17046       | 1,03 | No  |
| ENSMUSG00000091614 | -1,86E+00 | -3,033612668 | 1,39E+00 | 2,38E-01 | 5,50E-01 | Gm17657       | 0,28 | No  |
| ENSMUSG00000091617 | -1,33E+00 | -2,896104821 | 1,11E+00 | 2,92E-01 | 5,88E-01 | Gm3752        | 0,40 | No  |
| ENSMUSG00000091618 | -9,37E-01 | -2,7116555   | 7,69E-01 | 3,80E-01 | 6,81E-01 | H60c          | 0,52 | No  |
| ENSMUSG00000091619 | -3,49E-01 | -1,800985331 | 3,11E-01 | 5,77E-01 | 8,35E-01 | Gm3625        | 0,79 | No  |
| ENSMUSG00000091623 | -8,03E-02 | 3,126011025  | 5,38E-01 | 4,63E-01 | 7,52E-01 | Gm17092       | 0,95 | No  |
| ENSMUSG00000091625 | -1,40E-01 | 1,348296889  | 5,59E-01 | 4,54E-01 | 7,44E-01 | Lsm5          | 0,91 | No  |
| ENSMUSG00000091639 | 7,55E-02  | 6,447998905  | 1,43E+00 | 2,31E-01 | 5,50E-01 | Gm3756        | 1,05 | No  |
| ENSMUSG00000091649 | -4,71E-01 | 3,582585398  | 2,39E+01 | 1,00E-06 | 4,45E-05 | Phf11b        | 0,72 | Yes |
| ENSMUSG00000091655 | -1,08E-01 | 3,741702514  | 1,30E+00 | 2,55E-01 | 5,50E-01 | Gm8741        | 0,93 | No  |
| ENSMUSG00000091657 | -1,89E+00 | -3,1076441   | 1,42E+00 | 2,33E-01 | 5,50E-01 | Gm3072        | 0,27 | No  |
| ENSMUSG00000091659 | -1,10E+00 | -2,378292394 | 1,32E+00 | 2,50E-01 | 5,50E-01 | Gm17099       | 0,47 | No  |
| ENSMUSG00000091661 | -2,67E-01 | 1,865611926  | 3,06E+00 | 8,00E-02 | 3,62E-01 | Gm17021       | 0,83 | No  |
| ENSMUSG00000091680 | -1,94E+00 | -3,107619243 | 1,50E+00 | 2,21E-01 | 5,50E-01 | Klhdc7b       | 0,26 | No  |
| ENSMUSG00000091682 | -2,66E+00 | -3,033639428 | 2,81E+00 | 9,35E-02 | 3,83E-01 | Tcrg-C3       | 0,16 | No  |
| ENSMUSG00000091685 | 1,49E-01  | -1,070339772 | 1,11E-01 | 7,39E-01 | 9,26E-01 | Gm17359       | 1,11 | No  |
| ENSMUSG00000091686 | -1,87E+00 | -3,03364178  | 1,41E+00 | 2,36E-01 | 5,50E-01 | 4930471C04Rik | 0,27 | No  |
| ENSMUSG00000091695 | -3,42E-02 | 4,309937674  | 1,70E-01 | 6,80E-01 | 8,93E-01 | Gm17669       | 0,98 | No  |
| ENSMUSG00000091697 | -1,62E-01 | 4,914735889  | 4,72E+00 | 2,97E-02 | 1,97E-01 | Eif3s6-ps2    | 0,89 | No  |
| ENSMUSG00000091703 | -1,31E+00 | -2,03371007  | 3,59E+00 | 5,80E-02 | 2,97E-01 | Gm4222        | 0,40 | No  |
| ENSMUSG00000091705 | -5,11E-01 | -2,289410392 | 4,18E-01 | 5,18E-01 | 7,98E-01 | H2-Q2         | 0,70 | No  |
| ENSMUSG00000091709 | -1,89E+00 | -3,1076441   | 1,42E+00 | 2,33E-01 | 5,50E-01 | Gm17189       | 0,27 | No  |
| ENSMUSG00000091712 | 8,01E-01  | -2,711731266 | 5,58E-01 | 4,55E-01 | 7,45E-01 | Sec14l5       | 1,74 | No  |

|                    |           |              |           |          |          |               |      |    |
|--------------------|-----------|--------------|-----------|----------|----------|---------------|------|----|
| ENSMUSG00000091723 | 7,25E-01  | -2,896182007 | 2,86E-01  | 5,93E-01 | 8,42E-01 | Gm17366       | 1,65 | No |
| ENSMUSG00000091730 | -3,53E-01 | 1,675116061  | 4,42E+00  | 3,55E-02 | 2,23E-01 | Gm17230       | 0,78 | No |
| ENSMUSG00000091732 | -3,73E-01 | -2,401398139 | 1,75E-01  | 6,76E-01 | 8,91E-01 | Gm17541       | 0,77 | No |
| ENSMUSG00000091735 | -1,10E+00 | -1,946154769 | 2,11E+00  | 1,46E-01 | 4,84E-01 | Gpr62         | 0,47 | No |
| ENSMUSG00000091742 | -1,65E-01 | 2,269180158  | 1,38E+00  | 2,40E-01 | 5,50E-01 | Gm5093        | 0,89 | No |
| ENSMUSG00000091743 | 2,65E+00  | -3,033655087 | 2,73E+00  | 9,86E-02 | 3,91E-01 | Gm5705        | 6,30 | No |
| ENSMUSG00000091745 | -3,34E-02 | -0,529271029 | 8,69E-03  | 9,26E-01 | 1,00E+00 | Gm17098       | 0,98 | No |
| ENSMUSG00000091754 | 1,87E+00  | -3,03364371  | 1,36E+00  | 2,43E-01 | 5,50E-01 | Gm3636        | 3,66 | No |
| ENSMUSG00000091756 | -3,83E-02 | -3,107651936 | -7,91E-11 | 1,00E+00 | 1,00E+00 | Gm3095        | 0,97 | No |
| ENSMUSG00000091764 | 5,29E-01  | -0,401668628 | 2,70E+00  | 1,01E-01 | 3,92E-01 | Zfp964        | 1,44 | No |
| ENSMUSG00000091768 | -1,18E-01 | 0,062443928  | 1,73E-01  | 6,77E-01 | 8,92E-01 | Gm17617       | 0,92 | No |
| ENSMUSG00000091775 | -8,45E-01 | -2,963241229 | 3,92E-01  | 5,31E-01 | 8,05E-01 | Gm16494       | 0,56 | No |
| ENSMUSG00000091780 | 1,88E-01  | 3,573116767  | 3,63E+00  | 5,69E-02 | 2,93E-01 | Sco2          | 1,14 | No |
| ENSMUSG00000091784 | -1,66E-01 | 0,569366902  | 4,97E-01  | 4,81E-01 | 7,69E-01 | Gm17022       | 0,89 | No |
| ENSMUSG00000091786 | -5,35E-01 | -2,185601543 | 4,58E-01  | 4,98E-01 | 7,84E-01 | Gm8425        | 0,69 | No |
| ENSMUSG00000091794 | -1,94E+00 | -3,107619243 | 1,50E+00  | 2,21E-01 | 5,50E-01 | Vmn2r18       | 0,26 | No |
| ENSMUSG00000091803 | 1,06E-01  | 3,604386053  | 1,19E+00  | 2,76E-01 | 5,73E-01 | Cox16         | 1,08 | No |
| ENSMUSG00000091811 | -3,08E-02 | 3,395580193  | 9,07E-02  | 7,63E-01 | 9,39E-01 | Inafm1        | 0,98 | No |
| ENSMUSG00000091812 | 1,81E+00  | -3,10765737  | 1,28E+00  | 2,58E-01 | 5,50E-01 | Ear-ps5       | 3,49 | No |
| ENSMUSG00000091816 | -1,22E+00 | -3,146113954 | 6,96E-01  | 4,04E-01 | 7,01E-01 | Gm17141       | 0,43 | No |
| ENSMUSG00000091818 | 1,82E+00  | -2,998042513 | 1,31E+00  | 2,53E-01 | 5,50E-01 | Rpl19-ps4     | 3,52 | No |
| ENSMUSG00000091825 | -1,19E-02 | 6,704233952  | 3,72E-02  | 8,47E-01 | 9,87E-01 | Gm5778        | 0,99 | No |
| ENSMUSG00000091827 | -1,87E+00 | -3,107637761 | 1,39E+00  | 2,38E-01 | 5,50E-01 | Speer4f2      | 0,27 | No |
| ENSMUSG00000091831 | -3,15E-02 | 5,699535275  | 2,18E-01  | 6,40E-01 | 8,70E-01 | Gm4707        | 0,98 | No |
| ENSMUSG00000091844 | -6,83E-02 | -1,740906456 | 1,20E-02  | 9,13E-01 | 1,00E+00 | Gm8251        | 0,95 | No |
| ENSMUSG00000091845 | -1,62E-01 | 6,520454312  | 6,69E+00  | 9,69E-03 | 9,12E-02 | Gm4604        | 0,89 | No |
| ENSMUSG00000091864 | -2,03E+00 | -2,185552843 | 5,06E+00  | 2,44E-02 | 1,72E-01 | Gm17102       | 0,25 | No |
| ENSMUSG00000091866 | -7,61E-02 | 3,087822739  | 4,75E-01  | 4,91E-01 | 7,77E-01 | Gm6257        | 0,95 | No |
| ENSMUSG00000091876 | 3,60E-01  | 1,85845796   | 5,35E+00  | 2,07E-02 | 1,54E-01 | Gm3851        | 1,28 | No |
| ENSMUSG00000091881 | 8,26E-02  | -1,863727467 | 1,67E-02  | 8,97E-01 | 1,00E+00 | Gm17146       | 1,06 | No |
| ENSMUSG00000091890 | -1,22E+00 | -3,107630717 | 7,04E-01  | 4,02E-01 | 7,00E-01 | A830073O21Rik | 0,43 | No |
| ENSMUSG00000091894 | -1,89E+00 | -3,1076441   | 1,42E+00  | 2,33E-01 | 5,50E-01 | Gm3030        | 0,27 | No |

|                    |           |              |           |          |          |               |      |     |
|--------------------|-----------|--------------|-----------|----------|----------|---------------|------|-----|
| ENSMUSG00000091896 | -2,73E-02 | 6,346477098  | 1,85E-01  | 6,67E-01 | 8,86E-01 | Ube2d2a       | 0,98 | No  |
| ENSMUSG00000091898 | -1,87E-01 | -0,847706924 | 2,05E-01  | 6,51E-01 | 8,76E-01 | Tnnc1         | 0,88 | No  |
| ENSMUSG00000091900 | 9,53E-03  | 3,162580088  | 7,89E-03  | 9,29E-01 | 1,00E+00 | Gm4353        | 1,01 | No  |
| ENSMUSG00000091903 | 3,14E-02  | -3,107617333 | -7,69E-10 | 1,00E+00 | 1,00E+00 | Gm6460        | 1,02 | No  |
| ENSMUSG00000091905 | -1,49E-01 | 5,094014226  | 4,16E+00  | 4,13E-02 | 2,41E-01 | Gm6395        | 0,90 | No  |
| ENSMUSG00000091906 | 4,75E-01  | -1,473038486 | 8,55E-01  | 3,55E-01 | 6,56E-01 | 1700099I09Rik | 1,39 | No  |
| ENSMUSG00000091908 | 2,31E-01  | 0,533110846  | 9,05E-01  | 3,42E-01 | 6,42E-01 | Gm17231       | 1,17 | No  |
| ENSMUSG00000091922 | 2,67E+00  | -2,548332538 | 6,69E+00  | 9,70E-03 | 9,12E-02 | Gm17409       | 6,35 | No  |
| ENSMUSG00000091931 | -1,65E-02 | 2,887175887  | 2,02E-02  | 8,87E-01 | 1,00E+00 | Gon7          | 0,99 | No  |
| ENSMUSG00000091938 | 3,14E-02  | -3,107617333 | -7,69E-10 | 1,00E+00 | 1,00E+00 | Gm2564        | 1,02 | No  |
| ENSMUSG00000091941 | 7,72E-03  | 1,730487169  | 2,22E-03  | 9,62E-01 | 1,00E+00 | Gm7399        | 1,01 | No  |
| ENSMUSG00000091942 | 2,00E-01  | 0,128081719  | 5,08E-01  | 4,76E-01 | 7,64E-01 | Gm17138       | 1,15 | No  |
| ENSMUSG00000091952 | 4,68E-02  | 4,224651562  | 2,97E-01  | 5,86E-01 | 8,39E-01 | Gm17709       | 1,03 | No  |
| ENSMUSG00000091955 | -1,81E-01 | 7,925881527  | 9,59E+00  | 1,96E-03 | 2,76E-02 | Gm9844        | 0,88 | Yes |
| ENSMUSG00000091957 | -9,40E-02 | 7,61931348   | 2,53E+00  | 1,11E-01 | 4,10E-01 | Rps2-ps10     | 0,94 | No  |
| ENSMUSG00000091968 | 5,13E-01  | -1,863780591 | 4,78E-01  | 4,89E-01 | 7,76E-01 | Gm17115       | 1,43 | No  |
| ENSMUSG00000091971 | 1,63E-01  | 1,266493835  | 7,81E-01  | 3,77E-01 | 6,78E-01 | Hspa1a        | 1,12 | No  |
| ENSMUSG00000091983 | -1,94E+00 | -3,107619243 | 1,50E+00  | 2,21E-01 | 5,50E-01 | Olfr457       | 0,26 | No  |
| ENSMUSG00000091985 | 1,80E-02  | 2,90503236   | 2,36E-02  | 8,78E-01 | 1,00E+00 | Gm17354       | 1,01 | No  |
| ENSMUSG00000091989 | -5,36E-02 | 3,277040719  | 2,59E-01  | 6,11E-01 | 8,52E-01 | Ndufab1-ps    | 0,96 | No  |
| ENSMUSG00000091993 | -6,75E-02 | 1,508925271  | 1,36E-01  | 7,12E-01 | 9,11E-01 | B930036N10Rik | 0,95 | No  |
| ENSMUSG00000091994 | 5,70E-02  | 0,627249834  | 5,53E-02  | 8,14E-01 | 9,68E-01 | E130317F20Rik | 1,04 | No  |
| ENSMUSG00000091996 | -1,32E-01 | 2,552937997  | 1,07E+00  | 3,01E-01 | 5,97E-01 | BC049352      | 0,91 | No  |
| ENSMUSG00000091997 | -7,36E-02 | -0,412965603 | 4,54E-02  | 8,31E-01 | 9,78E-01 | Gm6611        | 0,95 | No  |
| ENSMUSG00000091998 | 1,87E+00  | -3,107639691 | 1,38E+00  | 2,40E-01 | 5,50E-01 | Gm17072       | 3,67 | No  |
| ENSMUSG00000092006 | 2,00E-03  | 2,616363443  | 2,60E-04  | 9,87E-01 | 1,00E+00 | Gm17139       | 1,00 | No  |
| ENSMUSG00000092009 | 1,74E-01  | -1,711744024 | 8,48E-02  | 7,71E-01 | 9,42E-01 | Myh15         | 1,13 | No  |
| ENSMUSG00000092014 | 1,26E-02  | -1,107581837 | 8,43E-04  | 9,77E-01 | 1,00E+00 | Gm4468        | 1,01 | No  |
| ENSMUSG00000092021 | 2,09E-01  | 1,402137829  | 1,37E+00  | 2,41E-01 | 5,50E-01 | Gbp11         | 1,16 | No  |
| ENSMUSG00000092029 | -2,54E-01 | 2,791977351  | 4,85E+00  | 2,76E-02 | 1,87E-01 | Gm9027        | 0,84 | No  |
| ENSMUSG00000092035 | -9,52E-01 | -2,548247557 | 7,94E-01  | 3,73E-01 | 6,74E-01 | Peg10         | 0,52 | No  |
| ENSMUSG00000092048 | -2,71E+00 | -3,033620915 | 2,92E+00  | 8,75E-02 | 3,78E-01 | Vmn2r85       | 0,15 | No  |



|                    |           |              |           |          |          |               |      |     |
|--------------------|-----------|--------------|-----------|----------|----------|---------------|------|-----|
| ENSMUSG00000092049 | 1,81E+00  | -3,10765737  | 1,28E+00  | 2,58E-01 | 5,50E-01 | Vmn2r4        | 3,49 | No  |
| ENSMUSG00000092051 | -1,33E+00 | -2,448637545 | 1,12E+00  | 2,91E-01 | 5,86E-01 | Gm17229       | 0,40 | No  |
| ENSMUSG00000092054 | 6,26E-01  | -2,107680437 | 7,94E-01  | 3,73E-01 | 6,74E-01 | Kif4-ps       | 1,54 | No  |
| ENSMUSG00000092056 | -3,51E-01 | 0,563458472  | 2,20E+00  | 1,38E-01 | 4,68E-01 | Gm7289        | 0,78 | No  |
| ENSMUSG00000092060 | -2,42E-02 | 3,464165778  | 5,96E-02  | 8,07E-01 | 9,64E-01 | Bend4         | 0,98 | No  |
| ENSMUSG00000092072 | -1,38E-01 | 4,1188935    | 2,53E+00  | 1,11E-01 | 4,10E-01 | Gm4540        | 0,91 | No  |
| ENSMUSG00000092074 | 2,60E-01  | 3,300937396  | 6,02E+00  | 1,41E-02 | 1,21E-01 | Dynlt1a       | 1,20 | No  |
| ENSMUSG00000092075 | -1,87E+00 | -3,107637761 | 1,39E+00  | 2,38E-01 | 5,50E-01 | Serpina4-ps1  | 0,27 | No  |
| ENSMUSG00000092077 | -1,49E+00 | -2,146025104 | 2,31E+00  | 1,29E-01 | 4,50E-01 | Olfr101       | 0,35 | No  |
| ENSMUSG00000092085 | -2,66E-01 | -2,548150913 | 6,03E-02  | 8,06E-01 | 9,64E-01 | Gm17224       | 0,83 | No  |
| ENSMUSG00000092086 | 6,78E-02  | 5,471031053  | 9,51E-01  | 3,29E-01 | 6,30E-01 | Gm6793        | 1,05 | No  |
| ENSMUSG00000092097 | -6,43E-02 | 0,259268226  | 6,22E-02  | 8,03E-01 | 9,62E-01 | Gm5819        | 0,96 | No  |
| ENSMUSG00000092103 | -1,60E-01 | -0,410682772 | 2,22E-01  | 6,37E-01 | 8,68E-01 | Gm17039       | 0,90 | No  |
| ENSMUSG00000092109 | -1,89E+00 | -3,1076441   | 1,42E+00  | 2,33E-01 | 5,50E-01 | Gm9376        | 0,27 | No  |
| ENSMUSG00000092116 | -2,58E-01 | 6,387445299  | 1,67E+01  | 4,38E-05 | 1,21E-03 | Gm10320       | 0,84 | Yes |
| ENSMUSG00000092118 | 1,85E-01  | 2,103809849  | 1,59E+00  | 2,07E-01 | 5,50E-01 | Fancf         | 1,14 | No  |
| ENSMUSG00000092120 | -2,71E+00 | -2,963182239 | 2,92E+00  | 8,75E-02 | 3,78E-01 | Vmn2r90       | 0,15 | No  |
| ENSMUSG00000092124 | 3,19E-01  | 1,826694341  | 3,85E+00  | 4,97E-02 | 2,69E-01 | B930094E09Rik | 1,25 | No  |
| ENSMUSG00000092130 | 1,19E-01  | -2,247052437 | 2,44E-02  | 8,76E-01 | 1,00E+00 | D030025P21Rik | 1,09 | No  |
| ENSMUSG00000092131 | -3,29E-01 | -2,355542741 | 1,62E-01  | 6,87E-01 | 8,98E-01 | BC050972      | 0,80 | No  |
| ENSMUSG00000092134 | -2,16E-01 | 1,869764943  | 1,89E+00  | 1,69E-01 | 5,24E-01 | Gm17089       | 0,86 | No  |
| ENSMUSG00000092137 | -8,01E-02 | 3,98852713   | 8,14E-01  | 3,67E-01 | 6,68E-01 | Gcom1         | 0,95 | No  |
| ENSMUSG00000092167 | -8,42E-01 | -2,896161952 | 3,88E-01  | 5,33E-01 | 8,06E-01 | Gm3696        | 0,56 | No  |
| ENSMUSG00000092171 | 3,17E-01  | -1,600578528 | 2,67E-01  | 6,06E-01 | 8,49E-01 | 4833427F10Rik | 1,25 | No  |
| ENSMUSG00000092174 | 1,14E-01  | -2,472934848 | 1,41E-02  | 9,06E-01 | 1,00E+00 | Gm7029        | 1,08 | No  |
| ENSMUSG00000092176 | 1,02E-01  | 2,576928985  | 6,27E-01  | 4,28E-01 | 7,22E-01 | Gm20460       | 1,07 | No  |
| ENSMUSG00000092178 | 3,85E-01  | -0,561264663 | 1,13E+00  | 2,89E-01 | 5,84E-01 | Gm45351       | 1,31 | No  |
| ENSMUSG00000092181 | -4,23E-01 | 0,359038416  | 2,68E+00  | 1,02E-01 | 3,94E-01 | Gm20432       | 0,75 | No  |
| ENSMUSG00000092182 | 3,14E-02  | -3,107617333 | -7,69E-10 | 1,00E+00 | 1,00E+00 | Gm20407       | 1,02 | No  |
| ENSMUSG00000092183 | 6,56E-01  | 0,868209137  | 9,82E+00  | 1,73E-03 | 2,49E-02 | 4930515G01Rik | 1,58 | Yes |
| ENSMUSG00000092185 | -5,69E-02 | -3,107650735 | 1,33E-03  | 9,71E-01 | 1,00E+00 | Gm20416       | 0,96 | No  |
| ENSMUSG00000092187 | 7,34E-02  | 1,376146611  | 1,56E-01  | 6,93E-01 | 9,01E-01 | Gm20457       | 1,05 | No  |

|                    |           |              |           |          |          |               |      |    |
|--------------------|-----------|--------------|-----------|----------|----------|---------------|------|----|
| ENSMUSG00000092190 | 1,66E-01  | 1,10965497   | 7,08E-01  | 4,00E-01 | 6,99E-01 | Gm20470       | 1,12 | No |
| ENSMUSG00000092191 | -8,60E-01 | -2,896084029 | 4,06E-01  | 5,24E-01 | 8,01E-01 | Gm7211        | 0,55 | No |
| ENSMUSG00000092192 | 1,63E-01  | -2,432934334 | 2,83E-02  | 8,66E-01 | 9,99E-01 | Dyx1c1        | 1,12 | No |
| ENSMUSG00000092193 | -3,44E-02 | 7,407292789  | 3,33E-01  | 5,64E-01 | 8,26E-01 | Cd9-ps        | 0,98 | No |
| ENSMUSG00000092200 | 2,30E+00  | -3,070172745 | 2,02E+00  | 1,55E-01 | 4,99E-01 | Tnxa          | 4,92 | No |
| ENSMUSG00000092202 | 2,44E-01  | -0,460822199 | 5,15E-01  | 4,73E-01 | 7,61E-01 | Stk19-ps1     | 1,18 | No |
| ENSMUSG00000092203 | -1,25E-01 | 3,474203058  | 1,59E+00  | 2,07E-01 | 5,50E-01 | 1110038B12Rik | 0,92 | No |
| ENSMUSG00000092212 | -1,52E-01 | -1,098107118 | 1,05E-01  | 7,45E-01 | 9,29E-01 | Slc22a13b-ps  | 0,90 | No |
| ENSMUSG00000092216 | -1,46E-01 | -0,042657288 | 2,42E-01  | 6,23E-01 | 8,58E-01 | Gm19345       | 0,90 | No |
| ENSMUSG00000092218 | -2,31E-01 | 0,508755211  | 8,69E-01  | 3,51E-01 | 6,53E-01 | Gm20529       | 0,85 | No |
| ENSMUSG00000092219 | 9,01E-03  | -3,107646452 | -5,16E-10 | 1,00E+00 | 1,00E+00 | Gm20443       | 1,01 | No |
| ENSMUSG00000092220 | -2,61E-01 | 1,69173684   | 2,44E+00  | 1,18E-01 | 4,28E-01 | Gm20528       | 0,83 | No |
| ENSMUSG00000092221 | -1,89E+00 | -3,1076441   | 1,42E+00  | 2,33E-01 | 5,50E-01 | Gm7230        | 0,27 | No |
| ENSMUSG00000092222 | -7,96E-01 | -0,946088364 | 3,60E+00  | 5,78E-02 | 2,97E-01 | Gm20506       | 0,58 | No |
| ENSMUSG00000092223 | 1,79E-01  | 2,607192094  | 2,05E+00  | 1,52E-01 | 4,94E-01 | Gm19807       | 1,13 | No |
| ENSMUSG00000092224 | 1,79E+00  | -2,378337768 | 3,06E+00  | 8,05E-02 | 3,64E-01 | Gm8815        | 3,47 | No |
| ENSMUSG00000092225 | 2,06E-02  | -3,146103739 | -9,26E-10 | 1,00E+00 | 1,00E+00 | Gm2381        | 1,01 | No |
| ENSMUSG00000092229 | 6,58E-01  | -2,711740537 | 3,58E-01  | 5,49E-01 | 8,17E-01 | Gm5977        | 1,58 | No |
| ENSMUSG00000092230 | -2,12E-01 | 3,460622019  | 4,47E+00  | 3,44E-02 | 2,19E-01 | Gm18889       | 0,86 | No |
| ENSMUSG00000092232 | -5,29E-02 | 4,263476418  | 3,99E-01  | 5,28E-01 | 8,04E-01 | Gm20521       | 0,96 | No |
| ENSMUSG00000092233 | -1,42E-01 | -0,896048013 | 1,23E-01  | 7,26E-01 | 9,18E-01 | Gm20403       | 0,91 | No |
| ENSMUSG00000092238 | -2,72E+00 | -2,83195241  | 2,92E+00  | 8,76E-02 | 3,78E-01 | Gm6004        | 0,15 | No |
| ENSMUSG00000092240 | -5,31E-02 | 4,395434035  | 4,12E-01  | 5,21E-01 | 7,99E-01 | Gm4246        | 0,96 | No |
| ENSMUSG00000092241 | -4,27E-01 | 1,240629393  | 5,39E+00  | 2,02E-02 | 1,52E-01 | Gm20522       | 0,74 | No |
| ENSMUSG00000092243 | -2,11E-01 | 3,903819638  | 5,53E+00  | 1,86E-02 | 1,44E-01 | Gm7030        | 0,86 | No |
| ENSMUSG00000092246 | -9,47E-01 | -1,711590631 | 2,51E+00  | 1,13E-01 | 4,14E-01 | Gm20493       | 0,52 | No |
| ENSMUSG00000092247 | -4,30E-02 | 0,236928903  | 2,64E-02  | 8,71E-01 | 1,00E+00 | Gm20426       | 0,97 | No |
| ENSMUSG00000092252 | -1,78E-01 | 0,999908142  | 7,16E-01  | 3,98E-01 | 6,98E-01 | Gm20499       | 0,88 | No |
| ENSMUSG00000092257 | -5,95E-02 | 1,483586819  | 1,11E-01  | 7,39E-01 | 9,26E-01 | Gm2308        | 0,96 | No |
| ENSMUSG00000092258 | -1,02E-02 | -3,082799817 | 1,20E-11  | 1,00E+00 | 1,00E+00 | Gm20444       | 0,99 | No |
| ENSMUSG00000092260 | -6,24E-02 | 0,678126968  | 7,16E-02  | 7,89E-01 | 9,54E-01 | Zfp963        | 0,96 | No |
| ENSMUSG00000092261 | 1,91E-01  | -1,333298913 | 1,40E-01  | 7,08E-01 | 9,09E-01 | Gm20519       | 1,14 | No |

|                    |           |              |          |          |          |             |      |     |
|--------------------|-----------|--------------|----------|----------|----------|-------------|------|-----|
| ENSMUSG00000092265 | -8,67E-01 | -2,655165882 | 4,11E-01 | 5,22E-01 | 8,00E-01 | Gm5682      | 0,55 | No  |
| ENSMUSG00000092267 | -4,76E-01 | 5,913970689  | 5,10E+01 | 9,04E-13 | 1,11E-10 | Gm20417     | 0,72 | Yes |
| ENSMUSG00000092268 | -6,24E-01 | -2,126701976 | 7,56E-01 | 3,85E-01 | 6,86E-01 | Gm20540     | 0,65 | No  |
| ENSMUSG00000092269 | 5,83E-02  | 1,674977894  | 1,23E-01 | 7,26E-01 | 9,18E-01 | Gm9577      | 1,04 | No  |
| ENSMUSG00000092274 | -2,96E-01 | 8,641185641  | 2,68E+01 | 2,20E-07 | 1,15E-05 | Neat1       | 0,81 | Yes |
| ENSMUSG00000092275 | -3,79E-01 | 3,056419423  | 1,23E+01 | 4,61E-04 | 8,60E-03 | Gm20465     | 0,77 | Yes |
| ENSMUSG00000092277 | -5,83E-01 | -0,512077284 | 2,87E+00 | 9,01E-02 | 3,80E-01 | Gm19684     | 0,67 | No  |
| ENSMUSG00000092278 | 6,91E-02  | 4,340889663  | 6,85E-01 | 4,08E-01 | 7,05E-01 | Gm8752      | 1,05 | No  |
| ENSMUSG00000092281 | 1,86E-01  | 0,950203621  | 7,44E-01 | 3,88E-01 | 6,88E-01 | Hmgb1-ps7   | 1,14 | No  |
| ENSMUSG00000092283 | 8,41E-03  | 3,93218771   | 8,64E-03 | 9,26E-01 | 1,00E+00 | Gm20412     | 1,01 | No  |
| ENSMUSG00000092284 | -9,34E-01 | -1,424795057 | 2,99E+00 | 8,39E-02 | 3,71E-01 | Gm8801      | 0,52 | No  |
| ENSMUSG00000092286 | -8,70E-01 | -2,896137506 | 4,16E-01 | 5,19E-01 | 7,98E-01 | Dtnbos      | 0,55 | No  |
| ENSMUSG00000092289 | -1,01E-01 | 1,752098237  | 3,76E-01 | 5,40E-01 | 8,10E-01 | Gm6659      | 0,93 | No  |
| ENSMUSG00000092292 | 2,33E-01  | -0,088518914 | 4,86E-01 | 4,86E-01 | 7,73E-01 | Olfr113     | 1,17 | No  |
| ENSMUSG00000092294 | -1,89E+00 | -3,1076441   | 1,42E+00 | 2,33E-01 | 5,50E-01 | Gm18200     | 0,27 | No  |
| ENSMUSG00000092300 | -2,96E-01 | -0,683088662 | 5,12E-01 | 4,74E-01 | 7,63E-01 | Cdk3-ps     | 0,81 | No  |
| ENSMUSG00000092301 | 1,81E+00  | -3,10765737  | 1,28E+00 | 2,58E-01 | 5,50E-01 | Gm6887      | 3,49 | No  |
| ENSMUSG00000092305 | 2,93E-01  | -2,548211147 | 8,74E-02 | 7,68E-01 | 9,41E-01 | Prps1l1     | 1,23 | No  |
| ENSMUSG00000092306 | -5,23E-02 | -2,963267963 | 1,24E-03 | 9,72E-01 | 1,00E+00 | Gm20447     | 0,96 | No  |
| ENSMUSG00000092310 | 1,77E-01  | -1,54821217  | 1,07E-01 | 7,43E-01 | 9,28E-01 | Gm20509     | 1,13 | No  |
| ENSMUSG00000092325 | -3,08E-02 | 3,484547682  | 9,41E-02 | 7,59E-01 | 9,36E-01 | Gm18284     | 0,98 | No  |
| ENSMUSG00000092329 | -4,50E-02 | 4,768578412  | 3,43E-01 | 5,58E-01 | 8,22E-01 | Gm20388     | 0,97 | No  |
| ENSMUSG00000092335 | 2,32E-01  | -2,355626155 | 6,79E-02 | 7,94E-01 | 9,56E-01 | Zfp977      | 1,17 | No  |
| ENSMUSG00000092338 | -1,68E+00 | -3,120604875 | 1,15E+00 | 2,83E-01 | 5,79E-01 | Gm26940     | 0,31 | No  |
| ENSMUSG00000092340 | -8,08E-01 | -2,831960754 | 3,58E-01 | 5,49E-01 | 8,16E-01 | Olfr754-ps1 | 0,57 | No  |
| ENSMUSG00000092341 | -4,49E-01 | 10,15729492  | 6,33E+01 | 1,76E-15 | 2,79E-13 | Malat1      | 0,73 | Yes |
| ENSMUSG00000092344 | -5,42E-02 | -2,497573699 | 3,36E-03 | 9,54E-01 | 1,00E+00 | Hspe1-ps3   | 0,96 | No  |
| ENSMUSG00000092345 | -3,88E-02 | 5,450197405  | 3,10E-01 | 5,78E-01 | 8,35E-01 | Gm20503     | 0,97 | No  |
| ENSMUSG00000092349 | -3,51E-01 | 0,006474842  | 1,53E+00 | 2,16E-01 | 5,50E-01 | Platr17     | 0,78 | No  |
| ENSMUSG00000092353 | -2,33E+00 | -3,033632386 | 2,12E+00 | 1,45E-01 | 4,82E-01 | Gm20539     | 0,20 | No  |
| ENSMUSG00000092354 | 3,74E-01  | 2,110449077  | 6,34E+00 | 1,18E-02 | 1,06E-01 | Gm20548     | 1,30 | No  |
| ENSMUSG00000092356 | -3,09E-01 | -1,535436515 | 2,90E-01 | 5,90E-01 | 8,41E-01 | Gm20532     | 0,81 | No  |

|                    |           |              |          |          |          |               |      |     |
|--------------------|-----------|--------------|----------|----------|----------|---------------|------|-----|
| ENSMUSG00000092358 | -4,19E-01 | 1,505946905  | 5,83E+00 | 1,58E-02 | 1,30E-01 | Gm20430       | 0,75 | No  |
| ENSMUSG00000092360 | -1,27E-01 | 3,075045105  | 1,32E+00 | 2,50E-01 | 5,50E-01 | Gm20441       | 0,92 | No  |
| ENSMUSG00000092362 | 6,22E-01  | 0,378881154  | 5,36E+00 | 2,06E-02 | 1,54E-01 | Gm20392       | 1,54 | No  |
| ENSMUSG00000092364 | -3,21E+00 | -2,831997654 | 4,34E+00 | 3,73E-02 | 2,30E-01 | Gm20476       | 0,11 | No  |
| ENSMUSG00000092365 | 4,29E-02  | -0,974907931 | 1,03E-02 | 9,19E-01 | 1,00E+00 | BC023719      | 1,03 | No  |
| ENSMUSG00000092366 | 6,98E-01  | -2,770622366 | 2,66E-01 | 6,06E-01 | 8,49E-01 | Gm17782       | 1,62 | No  |
| ENSMUSG00000092367 | 1,16E-02  | 1,491541353  | 4,20E-03 | 9,48E-01 | 1,00E+00 | Gm20479       | 1,01 | No  |
| ENSMUSG00000092368 | -1,29E-01 | -0,104482029 | 1,70E-01 | 6,80E-01 | 8,93E-01 | A930015D03Rik | 0,91 | No  |
| ENSMUSG00000092371 | 3,59E-02  | 2,184408466  | 6,22E-02 | 8,03E-01 | 9,62E-01 | Gm20511       | 1,03 | No  |
| ENSMUSG00000092373 | -5,36E-01 | 0,045366446  | 3,56E+00 | 5,92E-02 | 3,01E-01 | Gm20535       | 0,69 | No  |
| ENSMUSG00000092374 | 1,25E-01  | 2,960179063  | 1,18E+00 | 2,78E-01 | 5,75E-01 | Gm6623        | 1,09 | No  |
| ENSMUSG00000092376 | -1,93E-01 | -1,627600294 | 1,17E-01 | 7,32E-01 | 9,22E-01 | Gm19203       | 0,87 | No  |
| ENSMUSG00000092381 | -1,40E-02 | 2,629424687  | 1,27E-02 | 9,10E-01 | 1,00E+00 | Gm20512       | 0,99 | No  |
| ENSMUSG00000092383 | -1,89E+00 | -3,1076441   | 1,42E+00 | 2,33E-01 | 5,50E-01 | H2-Pb         | 0,27 | No  |
| ENSMUSG00000092384 | -4,14E-01 | -1,027582726 | 8,75E-01 | 3,49E-01 | 6,51E-01 | Gm4189        | 0,75 | No  |
| ENSMUSG00000092386 | 1,69E-02  | 4,378891908  | 4,20E-02 | 8,38E-01 | 9,82E-01 | Gm20536       | 1,01 | No  |
| ENSMUSG00000092389 | 1,97E-01  | -1,641445553 | 1,24E-01 | 7,24E-01 | 9,18E-01 | Gm20483       | 1,15 | No  |
| ENSMUSG00000092392 | -2,63E-02 | -3,033641358 | 2,33E-04 | 9,88E-01 | 1,00E+00 | Gm20546       | 0,98 | No  |
| ENSMUSG00000092395 | -1,11E-02 | 3,091441299  | 1,01E-02 | 9,20E-01 | 1,00E+00 | Gm20463       | 0,99 | No  |
| ENSMUSG00000092396 | -2,70E-01 | -2,07012128  | 1,26E-01 | 7,22E-01 | 9,17E-01 | Olfr758-ps1   | 0,83 | No  |
| ENSMUSG00000092399 | -3,56E-01 | -2,740910403 | 9,31E-02 | 7,60E-01 | 9,37E-01 | 4930556N13Rik | 0,78 | No  |
| ENSMUSG00000092405 | -1,16E-01 | 0,601497733  | 2,49E-01 | 6,18E-01 | 8,55E-01 | Gm20402       | 0,92 | No  |
| ENSMUSG00000092409 | -2,69E+00 | -2,711715329 | 2,88E+00 | 8,99E-02 | 3,80E-01 | Gm9613        | 0,15 | No  |
| ENSMUSG00000092412 | -2,91E-01 | 4,292878681  | 1,24E+01 | 4,23E-04 | 7,98E-03 | Gm20507       | 0,82 | Yes |
| ENSMUSG00000092413 | 5,47E-01  | -0,554808464 | 2,24E+00 | 1,35E-01 | 4,62E-01 | Olfr115       | 1,46 | No  |
| ENSMUSG00000092415 | 2,24E-01  | -0,389968153 | 4,20E-01 | 5,17E-01 | 7,98E-01 | Gm20513       | 1,17 | No  |
| ENSMUSG00000092416 | 4,18E-01  | 3,257581523  | 1,61E+01 | 5,91E-05 | 1,56E-03 | Zfp141        | 1,34 | Yes |
| ENSMUSG00000092417 | -8,08E-02 | 3,485930387  | 6,79E-01 | 4,10E-01 | 7,06E-01 | Gpank1        | 0,95 | No  |
| ENSMUSG00000092418 | 1,33E-01  | -0,560957386 | 1,26E-01 | 7,23E-01 | 9,17E-01 | Gm20406       | 1,10 | No  |
| ENSMUSG00000092428 | -7,14E-01 | -2,311130851 | 5,71E-01 | 4,50E-01 | 7,40E-01 | Gm20545       | 0,61 | No  |
| ENSMUSG00000092438 | 3,62E-01  | -0,413163539 | 1,02E+00 | 3,12E-01 | 6,11E-01 | Gm18734       | 1,29 | No  |
| ENSMUSG00000092439 | 7,29E-01  | -2,83203134  | 2,89E-01 | 5,91E-01 | 8,41E-01 | Vmn2r-ps37    | 1,66 | No  |

|                    |           |              |           |          |          |               |      |     |
|--------------------|-----------|--------------|-----------|----------|----------|---------------|------|-----|
| ENSMUSG00000092443 | -2,73E-01 | -1,587323711 | 2,44E-01  | 6,21E-01 | 8,57E-01 | Gm20726       | 0,83 | No  |
| ENSMUSG00000092444 | 3,25E-01  | -2,497563882 | 1,08E-01  | 7,43E-01 | 9,28E-01 | Gm18733       | 1,25 | No  |
| ENSMUSG00000092447 | 3,14E-02  | -3,107617333 | -7,69E-10 | 1,00E+00 | 1,00E+00 | Gm7696        | 1,02 | No  |
| ENSMUSG00000092452 | -7,17E-02 | -2,683162204 | 2,14E-03  | 9,63E-01 | 1,00E+00 | Vmn2r-ps45    | 0,95 | No  |
| ENSMUSG00000092454 | 1,54E-01  | 4,429912308  | 3,54E+00  | 5,98E-02 | 3,03E-01 | Gm2991        | 1,11 | No  |
| ENSMUSG00000092455 | -7,79E-03 | -0,963311772 | 3,47E-04  | 9,85E-01 | 1,00E+00 | Gm20456       | 0,99 | No  |
| ENSMUSG00000092457 | 7,24E-01  | -2,896151689 | 2,85E-01  | 5,93E-01 | 8,43E-01 | Gm8835        | 1,65 | No  |
| ENSMUSG00000092458 | 2,68E-02  | 2,292973303  | 3,71E-02  | 8,47E-01 | 9,87E-01 | Gm18737       | 1,02 | No  |
| ENSMUSG00000092460 | 9,01E-03  | -3,107646452 | -5,16E-10 | 1,00E+00 | 1,00E+00 | Gm8878        | 1,01 | No  |
| ENSMUSG00000092461 | 9,01E-03  | -3,107646452 | -5,16E-10 | 1,00E+00 | 1,00E+00 | Gm18833       | 1,01 | No  |
| ENSMUSG00000092464 | -2,29E-01 | 2,492168003  | 3,18E+00  | 7,46E-02 | 3,47E-01 | Gm8902        | 0,85 | No  |
| ENSMUSG00000092470 | 1,64E-01  | 3,98708203   | 3,35E+00  | 6,71E-02 | 3,26E-01 | Gm20518       | 1,12 | No  |
| ENSMUSG00000092471 | -1,87E+00 | -3,107637761 | 1,39E+00  | 2,38E-01 | 5,50E-01 | Cyp21a2-ps    | 0,27 | No  |
| ENSMUSG00000092474 | -1,49E+00 | -2,929314268 | 1,04E+00  | 3,09E-01 | 6,07E-01 | Gm20478       | 0,36 | No  |
| ENSMUSG00000092477 | -4,87E-02 | -2,896149255 | 1,54E-03  | 9,69E-01 | 1,00E+00 | Gm18808       | 0,97 | No  |
| ENSMUSG00000092482 | -6,31E-02 | 3,7700833    | 4,63E-01  | 4,96E-01 | 7,82E-01 | Gm20531       | 0,96 | No  |
| ENSMUSG00000092483 | -1,26E+00 | -3,107648018 | 7,30E-01  | 3,93E-01 | 6,93E-01 | Gm20421       | 0,42 | No  |
| ENSMUSG00000092486 | -1,30E-01 | 2,790301701  | 1,16E+00  | 2,81E-01 | 5,77E-01 | 2610524H06Rik | 0,91 | No  |
| ENSMUSG00000092490 | -4,73E-01 | -1,311191351 | 9,60E-01  | 3,27E-01 | 6,28E-01 | Gm20482       | 0,72 | No  |
| ENSMUSG00000092494 | 1,61E+00  | -2,711775337 | 1,77E+00  | 1,83E-01 | 5,46E-01 | Gm20420       | 3,05 | No  |
| ENSMUSG00000092495 | -4,18E-01 | 0,36585532   | 2,26E+00  | 1,33E-01 | 4,58E-01 | Gm20405       | 0,75 | No  |
| ENSMUSG00000092500 | 3,12E+00  | -2,832063573 | 3,96E+00  | 4,65E-02 | 2,58E-01 | Gm20400       | 8,67 | No  |
| ENSMUSG00000092505 | 2,62E+00  | -2,832029054 | 2,66E+00  | 1,03E-01 | 3,95E-01 | Gm19246       | 6,14 | No  |
| ENSMUSG00000092509 | -1,54E+00 | -2,355577531 | 3,41E+00  | 6,48E-02 | 3,19E-01 | Gm20394       | 0,34 | No  |
| ENSMUSG00000092510 | 6,41E-02  | -1,333142156 | 1,10E-02  | 9,16E-01 | 1,00E+00 | Gm18343       | 1,05 | No  |
| ENSMUSG00000092511 | -7,62E-02 | 4,400950367  | 8,81E-01  | 3,48E-01 | 6,49E-01 | Gm20547       | 0,95 | No  |
| ENSMUSG00000092512 | -2,66E-01 | -2,311177544 | 1,23E-01  | 7,26E-01 | 9,18E-01 | Gm4152        | 0,83 | No  |
| ENSMUSG00000092517 | -4,96E-01 | 2,017685055  | 1,16E+01  | 6,58E-04 | 1,15E-02 | Art2a-ps      | 0,71 | Yes |
| ENSMUSG00000092518 | 7,06E-01  | -2,896157169 | 2,71E-01  | 6,03E-01 | 8,48E-01 | Fam71e2       | 1,63 | No  |
| ENSMUSG00000092519 | 3,15E+00  | -2,832015607 | 4,06E+00  | 4,40E-02 | 2,50E-01 | Act19         | 8,90 | No  |
| ENSMUSG00000092524 | -6,40E-01 | -1,929187569 | 1,03E+00  | 3,10E-01 | 6,08E-01 | Olf756-ps1    | 0,64 | No  |
| ENSMUSG00000092526 | -1,17E-01 | 1,365745344  | 3,91E-01  | 5,32E-01 | 8,06E-01 | Gm17907       | 0,92 | No  |

|                    |           |              |          |          |          |                |      |     |
|--------------------|-----------|--------------|----------|----------|----------|----------------|------|-----|
| ENSMUSG00000092528 | 3,73E-01  | 3,948312124  | 1,65E+01 | 4,92E-05 | 1,34E-03 | Nlrp1c-ps      | 1,29 | Yes |
| ENSMUSG00000092534 | -2,20E-01 | 4,25605275   | 6,93E+00 | 8,48E-03 | 8,28E-02 | Pagr1b         | 0,86 | No  |
| ENSMUSG00000092539 | 4,79E-01  | -2,770621268 | 1,80E-01 | 6,71E-01 | 8,89E-01 | Gm20468        | 1,39 | No  |
| ENSMUSG00000092540 | -4,43E-01 | 0,338138278  | 2,86E+00 | 9,08E-02 | 3,82E-01 | Gm8738         | 0,74 | No  |
| ENSMUSG00000092541 | 5,14E-02  | 4,099877465  | 3,48E-01 | 5,55E-01 | 8,20E-01 | Gm20537        | 1,04 | No  |
| ENSMUSG00000092542 | 4,34E-01  | -2,711760772 | 1,47E-01 | 7,01E-01 | 9,05E-01 | Olfr757-ps1    | 1,35 | No  |
| ENSMUSG00000092543 | -1,32E+00 | -2,832003922 | 1,08E+00 | 2,98E-01 | 5,95E-01 | Skiv2l-ps1     | 0,40 | No  |
| ENSMUSG00000092544 | 1,04E-01  | 0,176099253  | 1,36E-01 | 7,12E-01 | 9,11E-01 | Gm20422        | 1,07 | No  |
| ENSMUSG00000092545 | 1,02E-01  | 1,315503111  | 2,93E-01 | 5,88E-01 | 8,40E-01 | Gm20319        | 1,07 | No  |
| ENSMUSG00000092550 | -2,28E-01 | 5,611711155  | 1,12E+01 | 8,08E-04 | 1,36E-02 | Gm20496        | 0,85 | Yes |
| ENSMUSG00000092552 | -3,88E-01 | -0,75550581  | 8,25E-01 | 3,64E-01 | 6,65E-01 | Gm4287         | 0,76 | No  |
| ENSMUSG00000092556 | -2,35E-02 | -0,912629766 | 2,61E-03 | 9,59E-01 | 1,00E+00 | Olfr755-ps1    | 0,98 | No  |
| ENSMUSG00000092557 | 1,08E+00  | -2,548237853 | 1,11E+00 | 2,93E-01 | 5,88E-01 | Gm8696         | 2,11 | No  |
| ENSMUSG00000092558 | 8,64E-02  | 4,497716077  | 1,18E+00 | 2,78E-01 | 5,74E-01 | Med20          | 1,06 | No  |
| ENSMUSG00000092560 | -3,19E-02 | 4,243040665  | 1,40E-01 | 7,09E-01 | 9,09E-01 | Gm8750         | 0,98 | No  |
| ENSMUSG00000092563 | -2,66E+00 | -3,033639428 | 2,81E+00 | 9,35E-02 | 3,83E-01 | Gm3617         | 0,16 | No  |
| ENSMUSG00000092564 | -3,15E-01 | 1,635036756  | 3,28E+00 | 7,02E-02 | 3,35E-01 | BC051226       | 0,80 | No  |
| ENSMUSG00000092568 | 1,21E+00  | -2,801035764 | 9,09E-01 | 3,40E-01 | 6,41E-01 | Olfr759-ps1    | 2,32 | No  |
| ENSMUSG00000092569 | 3,46E-01  | -0,683073155 | 6,76E-01 | 4,11E-01 | 7,07E-01 | Gm20544        | 1,27 | No  |
| ENSMUSG00000092571 | -2,63E-02 | -3,033641358 | 2,33E-04 | 9,88E-01 | 1,00E+00 | Gm4134         | 0,98 | No  |
| ENSMUSG00000092572 | -4,68E-01 | 1,255221205  | 5,39E+00 | 2,02E-02 | 1,52E-01 | Serpib10       | 0,72 | No  |
| ENSMUSG00000092574 | -3,17E-01 | -1,333061687 | 4,34E-01 | 5,10E-01 | 7,93E-01 | 2810047C21Rik1 | 0,80 | No  |
| ENSMUSG00000092577 | -5,80E-02 | -2,355579102 | 3,87E-03 | 9,50E-01 | 1,00E+00 | Gm7393         | 0,96 | No  |
| ENSMUSG00000092586 | -1,10E+00 | -2,896155297 | 7,09E-01 | 4,00E-01 | 6,99E-01 | Ly6g6c         | 0,47 | No  |
| ENSMUSG00000092591 | -1,09E-01 | -1,485252829 | 4,36E-02 | 8,35E-01 | 9,80E-01 | Gm20429        | 0,93 | No  |
| ENSMUSG00000092592 | -1,97E-02 | -1,885269531 | 8,23E-04 | 9,77E-01 | 1,00E+00 | Gm20449        | 0,99 | No  |
| ENSMUSG00000092593 | 1,72E-01  | -0,516450984 | 2,41E-01 | 6,24E-01 | 8,58E-01 | Gm20492        | 1,13 | No  |
| ENSMUSG00000092595 | 9,94E-02  | 6,172380732  | 2,37E+00 | 1,24E-01 | 4,40E-01 | Gm20427        | 1,07 | No  |
| ENSMUSG00000092596 | -4,41E-01 | -0,726184986 | 1,36E+00 | 2,43E-01 | 5,50E-01 | Gm20490        | 0,74 | No  |
| ENSMUSG00000092600 | 1,81E+00  | -3,10765737  | 1,28E+00 | 2,58E-01 | 5,50E-01 | Gm20442        | 3,49 | No  |
| ENSMUSG00000092601 | 1,87E-02  | -1,424732744 | 1,44E-03 | 9,70E-01 | 1,00E+00 | Olfr760-ps1    | 1,01 | No  |
| ENSMUSG00000092602 | -1,89E+00 | -3,1076441   | 1,42E+00 | 2,33E-01 | 5,50E-01 | 4931413I07Rik  | 0,27 | No  |

|                    |           |              |           |          |          |               |      |    |
|--------------------|-----------|--------------|-----------|----------|----------|---------------|------|----|
| ENSMUSG00000092604 | 1,36E+00  | -2,49767608  | 1,90E+00  | 1,68E-01 | 5,23E-01 | Gm20508       | 2,57 | No |
| ENSMUSG00000092607 | -8,86E-02 | 3,692035107  | 8,83E-01  | 3,47E-01 | 6,48E-01 | Scnm1         | 0,94 | No |
| ENSMUSG00000092609 | 5,93E-01  | -0,855818114 | 2,16E+00  | 1,42E-01 | 4,76E-01 | Gm20481       | 1,51 | No |
| ENSMUSG00000092617 | -1,92E+00 | -3,0336536   | 1,46E+00  | 2,27E-01 | 5,50E-01 | Gm8412        | 0,26 | No |
| ENSMUSG00000092618 | -1,68E+00 | -2,832007029 | 1,95E+00  | 1,63E-01 | 5,12E-01 | Btnl6         | 0,31 | No |
| ENSMUSG00000092621 | -2,68E+00 | -3,033645766 | 2,84E+00  | 9,17E-02 | 3,82E-01 | Vmn2r-ps66    | 0,16 | No |
| ENSMUSG00000092622 | 9,55E-01  | -2,205829576 | 1,44E+00  | 2,30E-01 | 5,50E-01 | Khdc3         | 1,94 | No |
| ENSMUSG00000092625 | -6,22E-01 | -1,015698918 | 1,74E+00  | 1,87E-01 | 5,50E-01 | Gm20404       | 0,65 | No |
| ENSMUSG00000092626 | 2,83E-01  | -0,314945557 | 6,66E-01  | 4,14E-01 | 7,10E-01 | 9130230N09Rik | 1,22 | No |
| ENSMUSG00000092627 | 5,12E-01  | -2,088800918 | 4,00E-01  | 5,27E-01 | 8,04E-01 | D130058E05Rik | 1,43 | No |
| ENSMUSG00000092641 | 1,21E-02  | -3,033650469 | 7,34E-11  | 1,00E+00 | 1,00E+00 | Gm23563       | 1,01 | No |
| ENSMUSG00000092644 | -9,20E-01 | -2,655073051 | 6,02E-01  | 4,38E-01 | 7,31E-01 | Gm23564       | 0,53 | No |
| ENSMUSG00000092648 | 1,87E+00  | -3,107639691 | 1,38E+00  | 2,40E-01 | 5,50E-01 | Gm23566       | 3,67 | No |
| ENSMUSG00000092650 | -8,38E-02 | 7,04523047   | 1,92E+00  | 1,66E-01 | 5,19E-01 | Gm25241       | 0,94 | No |
| ENSMUSG00000092655 | 1,31E-01  | 1,8768386    | 6,89E-01  | 4,07E-01 | 7,03E-01 | Gm25238       | 1,09 | No |
| ENSMUSG00000092659 | 5,65E-01  | -1,896231188 | 6,87E-01  | 4,07E-01 | 7,04E-01 | Mir3100       | 1,48 | No |
| ENSMUSG00000092660 | 1,57E+00  | -2,107629171 | 3,69E+00  | 5,46E-02 | 2,86E-01 | Gm22403       | 2,97 | No |
| ENSMUSG00000092666 | -6,58E-01 | -2,472908051 | 5,37E-01  | 4,64E-01 | 7,52E-01 | Gm22408       | 0,63 | No |
| ENSMUSG00000092671 | -7,48E-01 | -2,205747129 | 8,83E-01  | 3,47E-01 | 6,48E-01 | Gm24103       | 0,60 | No |
| ENSMUSG00000092673 | 3,14E-02  | -3,107617333 | -7,69E-10 | 1,00E+00 | 1,00E+00 | Mir3067       | 1,02 | No |
| ENSMUSG00000092674 | -1,87E+00 | -3,107637761 | 1,39E+00  | 2,38E-01 | 5,50E-01 | Gm24105       | 0,27 | No |
| ENSMUSG00000092675 | -2,49E-02 | -3,146121042 | -4,44E-11 | 1,00E+00 | 1,00E+00 | Gm25262       | 0,98 | No |
| ENSMUSG00000092677 | 1,21E-02  | -3,033650469 | 7,34E-11  | 1,00E+00 | 1,00E+00 | Mir5106       | 1,01 | No |
| ENSMUSG00000092679 | 1,15E-01  | 0,760009583  | 2,50E-01  | 6,17E-01 | 8,55E-01 | Mir5129       | 1,08 | No |
| ENSMUSG00000092680 | 4,38E-01  | -0,361056654 | 1,48E+00  | 2,23E-01 | 5,50E-01 | Snord55       | 1,35 | No |
| ENSMUSG00000092683 | -6,78E-01 | -2,918604305 | 2,40E-01  | 6,25E-01 | 8,59E-01 | Gm25747       | 0,62 | No |
| ENSMUSG00000092686 | -1,28E-01 | 4,048830605  | 2,08E+00  | 1,49E-01 | 4,90E-01 | Gm25745       | 0,92 | No |
| ENSMUSG00000092687 | 2,73E-01  | -2,740884099 | 4,60E-02  | 8,30E-01 | 9,77E-01 | Gm25744       | 1,21 | No |
| ENSMUSG00000092695 | -3,83E-02 | -3,107651936 | -7,91E-11 | 1,00E+00 | 1,00E+00 | Mir3092       | 0,97 | No |
| ENSMUSG00000092696 | 3,90E-03  | -1,800970516 | 4,02E-05  | 9,95E-01 | 1,00E+00 | Mir5133       | 1,00 | No |
| ENSMUSG00000092698 | -1,51E+00 | -2,497553681 | 2,35E+00  | 1,26E-01 | 4,44E-01 | Gm22926       | 0,35 | No |
| ENSMUSG00000092701 | -7,38E-02 | -3,033634644 | 2,66E-03  | 9,59E-01 | 1,00E+00 | Gm24515       | 0,95 | No |

|                    |           |              |           |          |          |           |      |    |
|--------------------|-----------|--------------|-----------|----------|----------|-----------|------|----|
| ENSMUSG00000092713 | -1,55E-01 | -1,912556893 | 4,62E-02  | 8,30E-01 | 9,77E-01 | Gm22858   | 0,90 | No |
| ENSMUSG00000092724 | -1,24E+00 | -3,107644849 | 7,21E-01  | 3,96E-01 | 6,96E-01 | Gm25677   | 0,42 | No |
| ENSMUSG00000092727 | 8,32E-02  | -0,920997962 | 3,76E-02  | 8,46E-01 | 9,87E-01 | Mir3062   | 1,06 | No |
| ENSMUSG00000092730 | 2,67E-02  | -1,051837748 | 4,03E-03  | 9,49E-01 | 1,00E+00 | Snora24   | 1,02 | No |
| ENSMUSG00000092734 | 1,59E+00  | -2,6552014   | 1,73E+00  | 1,89E-01 | 5,50E-01 | Mir5100   | 3,00 | No |
| ENSMUSG00000092737 | -2,81E-01 | -3,09553591  | 2,98E-02  | 8,63E-01 | 9,97E-01 | Gm24022   | 0,82 | No |
| ENSMUSG00000092741 | 7,85E-01  | -0,714041991 | 3,41E+00  | 6,50E-02 | 3,19E-01 | Mir3074-1 | 1,72 | No |
| ENSMUSG00000092743 | -1,87E+00 | -3,107637761 | 1,39E+00  | 2,38E-01 | 5,50E-01 | Gm22177   | 0,27 | No |
| ENSMUSG00000092745 | 4,54E-01  | 0,425709017  | 3,04E+00  | 8,13E-02 | 3,66E-01 | Mir5122   | 1,37 | No |
| ENSMUSG00000092746 | -3,25E-01 | -1,946158401 | 2,14E-01  | 6,44E-01 | 8,72E-01 | Rn7s6     | 0,80 | No |
| ENSMUSG00000092747 | 1,17E+00  | -3,14612376  | 6,40E-01  | 4,24E-01 | 7,18E-01 | Gm22180   | 2,26 | No |
| ENSMUSG00000092748 | -2,69E+00 | -2,896097497 | 2,87E+00  | 9,05E-02 | 3,81E-01 | Gm22175   | 0,16 | No |
| ENSMUSG00000092758 | 2,59E-01  | -1,24709452  | 2,80E-01  | 5,97E-01 | 8,45E-01 | Gm25026   | 1,20 | No |
| ENSMUSG00000092760 | 7,36E-01  | -2,89615794  | 2,95E-01  | 5,87E-01 | 8,40E-01 | Gm23365   | 1,67 | No |
| ENSMUSG00000092781 | 3,20E-01  | -0,18569466  | 1,02E+00  | 3,13E-01 | 6,13E-01 | Mir3057   | 1,25 | No |
| ENSMUSG00000092784 | 3,69E-01  | -2,448697389 | 1,79E-01  | 6,72E-01 | 8,89E-01 | Mir3077   | 1,29 | No |
| ENSMUSG00000092795 | -2,80E-01 | -2,033547771 | 1,36E-01  | 7,12E-01 | 9,11E-01 | Gm22690   | 0,82 | No |
| ENSMUSG00000092799 | -6,99E-01 | -3,070161788 | 1,96E-01  | 6,58E-01 | 8,81E-01 | Gm25927   | 0,62 | No |
| ENSMUSG00000092805 | -5,75E-01 | -1,600478034 | 1,10E+00  | 2,94E-01 | 5,89E-01 | Gm26461   | 0,67 | No |
| ENSMUSG00000092812 | -8,38E-01 | -2,770583372 | 3,85E-01  | 5,35E-01 | 8,07E-01 | Gm23634   | 0,56 | No |
| ENSMUSG00000092814 | 3,11E+00  | -2,711748198 | 3,96E+00  | 4,67E-02 | 2,58E-01 | Gm23638   | 8,65 | No |
| ENSMUSG00000092818 | -1,90E+00 | -3,033594154 | 1,44E+00  | 2,30E-01 | 5,50E-01 | Gm27361   | 0,27 | No |
| ENSMUSG00000092819 | -4,66E-01 | -0,64107936  | 1,51E+00  | 2,20E-01 | 5,50E-01 | Gm23639   | 0,72 | No |
| ENSMUSG00000092826 | -2,49E-02 | -3,146121042 | -4,44E-11 | 1,00E+00 | 1,00E+00 | Gm24197   | 0,98 | No |
| ENSMUSG00000092827 | -1,40E-01 | -0,436622254 | 1,56E-01  | 6,92E-01 | 9,01E-01 | Mir3091   | 0,91 | No |
| ENSMUSG00000092832 | -1,94E+00 | -3,107619243 | 1,50E+00  | 2,21E-01 | 5,50E-01 | Mir3088   | 0,26 | No |
| ENSMUSG00000092835 | 1,81E+00  | -3,10765737  | 1,28E+00  | 2,58E-01 | 5,50E-01 | Gm24819   | 3,49 | No |
| ENSMUSG00000092837 | -2,51E-02 | 0,7001801    | 1,13E-02  | 9,15E-01 | 1,00E+00 | Rpph1     | 0,98 | No |
| ENSMUSG00000092843 | 3,14E-02  | -3,107617333 | -7,69E-10 | 1,00E+00 | 1,00E+00 | Gm24332   | 1,02 | No |
| ENSMUSG00000092845 | 5,30E-01  | -2,31118903  | 3,47E-01  | 5,56E-01 | 8,21E-01 | Gm24328   | 1,44 | No |
| ENSMUSG00000092851 | -5,50E-01 | -2,831978667 | 2,36E-01  | 6,27E-01 | 8,61E-01 | Gm25960   | 0,68 | No |
| ENSMUSG00000092852 | -3,90E-01 | -1,460710067 | 5,75E-01  | 4,48E-01 | 7,39E-01 | Mir5103   | 0,76 | No |



|                    |           |              |           |          |          |          |      |    |
|--------------------|-----------|--------------|-----------|----------|----------|----------|------|----|
| ENSMUSG00000092862 | -3,99E-01 | -1,561004768 | 4,34E-01  | 5,10E-01 | 7,93E-01 | Mir3094  | 0,76 | No |
| ENSMUSG00000092867 | 3,91E-02  | -0,863791648 | 9,99E-03  | 9,20E-01 | 1,00E+00 | Mir3058  | 1,03 | No |
| ENSMUSG00000092868 | -4,31E-01 | -0,733577904 | 1,25E+00  | 2,64E-01 | 5,58E-01 | Mir5113  | 0,74 | No |
| ENSMUSG00000092870 | -2,48E-01 | -1,058059893 | 2,75E-01  | 6,00E-01 | 8,46E-01 | Mir3061  | 0,84 | No |
| ENSMUSG00000092885 | -6,35E-02 | 1,266687341  | 1,06E-01  | 7,44E-01 | 9,29E-01 | Gm22123  | 0,96 | No |
| ENSMUSG00000092887 | 1,94E-02  | -0,548171124 | 2,72E-03  | 9,58E-01 | 1,00E+00 | Snord53  | 1,01 | No |
| ENSMUSG00000092889 | -4,15E-01 | -1,07020346  | 8,62E-01  | 3,53E-01 | 6,54E-01 | Gm22121  | 0,75 | No |
| ENSMUSG00000092891 | 1,81E+00  | -3,10765737  | 1,28E+00  | 2,58E-01 | 5,50E-01 | Gm23810  | 3,49 | No |
| ENSMUSG00000092897 | -6,15E-02 | 4,37934476   | 5,61E-01  | 4,54E-01 | 7,44E-01 | Gm23812  | 0,96 | No |
| ENSMUSG00000092901 | 3,54E-01  | 2,207742611  | 5,99E+00  | 1,44E-02 | 1,22E-01 | Mir5130  | 1,28 | No |
| ENSMUSG00000092905 | 9,01E-03  | -3,107646452 | -5,16E-10 | 1,00E+00 | 1,00E+00 | Gm25735  | 1,01 | No |
| ENSMUSG00000092915 | 4,74E-02  | -2,780276629 | 1,48E-03  | 9,69E-01 | 1,00E+00 | Gm24083  | 1,03 | No |
| ENSMUSG00000092916 | -4,12E-01 | 0,091856268  | 2,01E+00  | 1,57E-01 | 5,01E-01 | Gm24082  | 0,75 | No |
| ENSMUSG00000092918 | -1,18E+00 | -2,311104759 | 1,80E+00  | 1,79E-01 | 5,40E-01 | Gm24081  | 0,44 | No |
| ENSMUSG00000092920 | 1,24E+00  | -2,333172457 | 1,52E+00  | 2,18E-01 | 5,50E-01 | Mirt2    | 2,36 | No |
| ENSMUSG00000092922 | 1,77E-01  | -2,627611047 | 2,67E-02  | 8,70E-01 | 1,00E+00 | Mir5101  | 1,13 | No |
| ENSMUSG00000092923 | -1,94E+00 | -3,107619243 | 1,50E+00  | 2,21E-01 | 5,50E-01 | Gm24561  | 0,26 | No |
| ENSMUSG00000092928 | 7,45E-01  | -2,896149091 | 3,02E-01  | 5,82E-01 | 8,38E-01 | Gm24563  | 1,68 | No |
| ENSMUSG00000092931 | -8,20E-01 | -2,311191895 | 9,79E-01  | 3,23E-01 | 6,23E-01 | Gm22904  | 0,57 | No |
| ENSMUSG00000092935 | 1,05E-01  | 0,09972922   | 1,44E-01  | 7,04E-01 | 9,06E-01 | Gm22697  | 1,08 | No |
| ENSMUSG00000092939 | -1,89E+00 | -3,1076441   | 1,42E+00  | 2,33E-01 | 5,50E-01 | Gm22907  | 0,27 | No |
| ENSMUSG00000092949 | 1,77E-01  | -1,401415311 | 1,01E-01  | 7,51E-01 | 9,32E-01 | Gm23394  | 1,13 | No |
| ENSMUSG00000092953 | -1,23E+00 | -3,146117124 | 7,12E-01  | 3,99E-01 | 6,98E-01 | Gm26217  | 0,42 | No |
| ENSMUSG00000092956 | -9,97E-01 | -3,045951704 | 3,81E-01  | 5,37E-01 | 8,09E-01 | Gm26220  | 0,50 | No |
| ENSMUSG00000092958 | 3,17E+00  | -2,896124898 | 4,11E+00  | 4,25E-02 | 2,45E-01 | Mir5128  | 9,03 | No |
| ENSMUSG00000092966 | -6,64E-01 | -1,53544377  | 1,44E+00  | 2,30E-01 | 5,50E-01 | Gm22240  | 0,63 | No |
| ENSMUSG00000092981 | -4,93E-02 | 3,162820448  | 2,09E-01  | 6,48E-01 | 8,75E-01 | Mir5125  | 0,97 | No |
| ENSMUSG00000092985 | 1,60E+00  | -2,600722437 | 1,76E+00  | 1,85E-01 | 5,49E-01 | Mir378b  | 3,03 | No |
| ENSMUSG00000092995 | 9,73E-01  | -2,6276882   | 8,63E-01  | 3,53E-01 | 6,54E-01 | Mir16-1  | 1,96 | No |
| ENSMUSG00000093003 | 4,10E-01  | -0,6414955   | 1,29E+00  | 2,56E-01 | 5,50E-01 | Mir3473c | 1,33 | No |
| ENSMUSG00000093004 | -4,43E-01 | -1,424871365 | 7,54E-01  | 3,85E-01 | 6,86E-01 | Gm24158  | 0,74 | No |
| ENSMUSG00000093006 | 1,76E-01  | 3,29159585   | 2,84E+00  | 9,20E-02 | 3,82E-01 | Gm24157  | 1,13 | No |

|                    |           |              |           |          |          |          |      |    |
|--------------------|-----------|--------------|-----------|----------|----------|----------|------|----|
| ENSMUSG00000093007 | 6,32E-01  | -3,07016611  | 1,62E-01  | 6,88E-01 | 8,98E-01 | Mir15a   | 1,55 | No |
| ENSMUSG00000093009 | 4,07E-01  | -2,49756216  | 1,96E-01  | 6,58E-01 | 8,81E-01 | Snord52  | 1,33 | No |
| ENSMUSG00000093026 | 1,46E-01  | -2,740882178 | 1,78E-02  | 8,94E-01 | 1,00E+00 | Gm25301  | 1,11 | No |
| ENSMUSG00000093030 | 2,63E+00  | -2,963269893 | 2,67E+00  | 1,02E-01 | 3,94E-01 | Gm23632  | 6,19 | No |
| ENSMUSG00000093034 | 1,81E+00  | -3,10765737  | 1,28E+00  | 2,58E-01 | 5,50E-01 | Gm23633  | 3,49 | No |
| ENSMUSG00000093037 | 1,87E+00  | -3,107639691 | 1,38E+00  | 2,40E-01 | 5,50E-01 | Mir3066  | 3,67 | No |
| ENSMUSG00000093042 | -2,68E+00 | -2,831965433 | 2,85E+00  | 9,14E-02 | 3,82E-01 | Mir3109  | 0,16 | No |
| ENSMUSG00000093044 | 7,49E-01  | -1,289422818 | 1,70E+00  | 1,92E-01 | 5,50E-01 | Snord8   | 1,68 | No |
| ENSMUSG00000093052 | -4,13E-02 | -3,033659495 | 7,08E-04  | 9,79E-01 | 1,00E+00 | Gm24816  | 0,97 | No |
| ENSMUSG00000093060 | 1,85E+00  | -3,107657832 | 1,35E+00  | 2,46E-01 | 5,50E-01 | Mir5104  | 3,61 | No |
| ENSMUSG00000093061 | -1,92E+00 | -3,0336536   | 1,46E+00  | 2,27E-01 | 5,50E-01 | Mir5098  | 0,26 | No |
| ENSMUSG00000093063 | -1,85E+00 | -2,96319884  | 1,39E+00  | 2,38E-01 | 5,50E-01 | Gm23152  | 0,28 | No |
| ENSMUSG00000093067 | 7,66E-01  | -2,863683117 | 3,19E-01  | 5,72E-01 | 8,32E-01 | Gm23156  | 1,70 | No |
| ENSMUSG00000093070 | -5,01E-01 | -2,929288688 | 1,26E-01  | 7,22E-01 | 9,17E-01 | Gm25952  | 0,71 | No |
| ENSMUSG00000093071 | 9,68E-02  | 2,14335132   | 4,48E-01  | 5,03E-01 | 7,88E-01 | Gm25951  | 1,07 | No |
| ENSMUSG00000093074 | -1,22E+00 | -3,146113954 | 6,96E-01  | 4,04E-01 | 7,01E-01 | Gm25949  | 0,43 | No |
| ENSMUSG00000093075 | 4,45E-01  | -0,801104432 | 1,23E+00  | 2,66E-01 | 5,63E-01 | Gm25948  | 1,36 | No |
| ENSMUSG00000093076 | 9,48E-02  | 1,00839361   | 2,14E-01  | 6,43E-01 | 8,72E-01 | Mir3082  | 1,07 | No |
| ENSMUSG00000093079 | 8,49E-01  | -2,497664894 | 8,68E-01  | 3,52E-01 | 6,53E-01 | Gm25953  | 1,80 | No |
| ENSMUSG00000093080 | 2,68E-01  | -0,912752631 | 4,15E-01  | 5,19E-01 | 7,98E-01 | Mir3060  | 1,20 | No |
| ENSMUSG00000093081 | -1,95E+00 | -3,033628749 | 1,50E+00  | 2,21E-01 | 5,50E-01 | Mir3075  | 0,26 | No |
| ENSMUSG00000093083 | -3,83E-02 | -3,107651936 | -7,91E-11 | 1,00E+00 | 1,00E+00 | Gm24323  | 0,97 | No |
| ENSMUSG00000093087 | -3,87E+00 | -2,448679213 | 7,18E+00  | 7,38E-03 | 7,46E-02 | Mir3473d | 0,07 | No |
| ENSMUSG00000093092 | 5,54E-01  | -1,268170071 | 1,37E+00  | 2,43E-01 | 5,50E-01 | Gm22643  | 1,47 | No |
| ENSMUSG00000093097 | 7,12E-01  | -1,801020438 | 1,37E+00  | 2,42E-01 | 5,50E-01 | Mir3097  | 1,64 | No |
| ENSMUSG00000093100 | -3,32E-02 | -2,711669339 | 7,78E-04  | 9,78E-01 | 1,00E+00 | Mir3971  | 0,98 | No |
| ENSMUSG00000093105 | 1,87E+00  | -3,03364371  | 1,36E+00  | 2,43E-01 | 5,50E-01 | Gm25535  | 3,66 | No |
| ENSMUSG00000093107 | 2,04E-01  | -2,14340149  | 7,35E-02  | 7,86E-01 | 9,52E-01 | Mir1839  | 1,15 | No |
| ENSMUSG00000093119 | -1,92E+00 | -2,896164745 | 1,46E+00  | 2,27E-01 | 5,50E-01 | Gm25640  | 0,26 | No |
| ENSMUSG00000093120 | 2,68E-01  | -1,088758285 | 3,00E-01  | 5,84E-01 | 8,38E-01 | Mir3474  | 1,20 | No |
| ENSMUSG00000093124 | 1,04E-01  | -0,006900192 | 1,27E-01  | 7,22E-01 | 9,16E-01 | Gm24366  | 1,07 | No |
| ENSMUSG00000093132 | 7,31E-01  | -2,963243158 | 2,91E-01  | 5,90E-01 | 8,41E-01 | Gm25993  | 1,66 | No |

|                    |           |              |           |          |          |         |      |    |
|--------------------|-----------|--------------|-----------|----------|----------|---------|------|----|
| ENSMUSG00000093133 | -2,04E-01 | 3,79189197   | 4,87E+00  | 2,74E-02 | 1,86E-01 | Gm25994 | 0,87 | No |
| ENSMUSG00000093139 | 3,14E-02  | -3,107617333 | -7,69E-10 | 1,00E+00 | 1,00E+00 | Gm25999 | 1,02 | No |
| ENSMUSG00000093140 | 3,14E-02  | -3,107617333 | -7,69E-10 | 1,00E+00 | 1,00E+00 | Mir28b  | 1,02 | No |
| ENSMUSG00000093147 | 2,98E-01  | -2,60068189  | 9,06E-02  | 7,63E-01 | 9,39E-01 | Gm23369 | 1,23 | No |
| ENSMUSG00000093148 | -1,01E-02 | -0,896235962 | 5,79E-04  | 9,81E-01 | 1,00E+00 | Gm23375 | 0,99 | No |
| ENSMUSG00000093149 | -1,26E-01 | 5,524749926  | 3,35E+00  | 6,71E-02 | 3,26E-01 | Gm23374 | 0,92 | No |
| ENSMUSG00000093152 | 1,22E+00  | -3,146114919 | 6,90E-01  | 4,06E-01 | 7,02E-01 | Gm25032 | 2,33 | No |
| ENSMUSG00000093155 | 1,79E-01  | -2,401372948 | 4,82E-02  | 8,26E-01 | 9,75E-01 | Gm25035 | 1,13 | No |
| ENSMUSG00000093156 | 2,53E-01  | 2,26994108   | 3,27E+00  | 7,06E-02 | 3,36E-01 | Mir3076 | 1,19 | No |
| ENSMUSG00000093157 | 7,05E-02  | -2,378313971 | 6,57E-03  | 9,35E-01 | 1,00E+00 | Mir3098 | 1,05 | No |
| ENSMUSG00000093162 | -5,23E-02 | -2,963273906 | 1,24E-03  | 9,72E-01 | 1,00E+00 | Gm22184 | 0,96 | No |
| ENSMUSG00000093167 | -2,25E-01 | 1,606339114  | 1,78E+00  | 1,82E-01 | 5,44E-01 | Mir5131 | 0,86 | No |
| ENSMUSG00000093168 | -3,58E+00 | -2,831964991 | 5,78E+00  | 1,62E-02 | 1,32E-01 | Gm22990 | 0,08 | No |
| ENSMUSG00000093176 | 4,77E-01  | -2,107728426 | 4,40E-01  | 5,07E-01 | 7,91E-01 | Mir5119 | 1,39 | No |
| ENSMUSG00000093178 | 1,38E-01  | -0,963208683 | 8,29E-02  | 7,73E-01 | 9,44E-01 | Snord87 | 1,10 | No |
| ENSMUSG00000093185 | 2,77E-01  | 1,435358024  | 2,42E+00  | 1,19E-01 | 4,30E-01 | Gm25692 | 1,21 | No |
| ENSMUSG00000093189 | 7,63E-01  | -2,896152067 | 3,18E-01  | 5,73E-01 | 8,32E-01 | Gm25694 | 1,70 | No |
| ENSMUSG00000093190 | -7,38E-02 | -3,033634644 | 2,66E-03  | 9,59E-01 | 1,00E+00 | Gm22875 | 0,95 | No |
| ENSMUSG00000093192 | -1,12E+00 | -2,497555675 | 1,15E+00  | 2,84E-01 | 5,80E-01 | Gm22877 | 0,46 | No |
| ENSMUSG00000093207 | 9,01E-03  | -3,107646452 | -5,16E-10 | 1,00E+00 | 1,00E+00 | Gm22414 | 1,01 | No |
| ENSMUSG00000093208 | -7,56E-04 | 0,214400433  | 7,19E-06  | 9,98E-01 | 1,00E+00 | Gm27325 | 1,00 | No |
| ENSMUSG00000093215 | 3,69E-01  | -2,522679754 | 1,22E-01  | 7,26E-01 | 9,19E-01 | Mir3103 | 1,29 | No |
| ENSMUSG00000093223 | 9,01E-03  | -3,107646452 | -5,16E-10 | 1,00E+00 | 1,00E+00 | Gm27903 | 1,01 | No |
| ENSMUSG00000093232 | -9,45E-01 | -3,159427022 | 4,94E-01  | 4,82E-01 | 7,69E-01 | Gm24111 | 0,52 | No |
| ENSMUSG00000093238 | -2,70E+00 | -2,711691361 | 2,89E+00  | 8,93E-02 | 3,79E-01 | Mir9-3  | 0,15 | No |
| ENSMUSG00000093239 | -4,79E-01 | -2,14607804  | 4,23E-01  | 5,15E-01 | 7,97E-01 | Gm24106 | 0,72 | No |
| ENSMUSG00000093241 | -5,61E-01 | -2,711718356 | 2,46E-01  | 6,20E-01 | 8,57E-01 | Mir3108 | 0,68 | No |
| ENSMUSG00000093242 | -5,87E-01 | -1,831964087 | 8,11E-01  | 3,68E-01 | 6,69E-01 | Gm24574 | 0,67 | No |
| ENSMUSG00000093245 | 6,17E-03  | -1,271829111 | 1,60E-04  | 9,90E-01 | 1,00E+00 | Mir677  | 1,00 | No |
| ENSMUSG00000093246 | 2,55E-01  | 0,020726661  | 7,71E-01  | 3,80E-01 | 6,81E-01 | Gm24572 | 1,19 | No |
| ENSMUSG00000093249 | 1,86E+00  | -3,033661846 | 1,35E+00  | 2,46E-01 | 5,50E-01 | Gm24576 | 3,62 | No |
| ENSMUSG00000093256 | 6,65E-02  | -0,697414675 | 3,24E-02  | 8,57E-01 | 9,94E-01 | Gm22933 | 1,05 | No |

|                    |           |              |           |          |          |         |      |     |
|--------------------|-----------|--------------|-----------|----------|----------|---------|------|-----|
| ENSMUSG00000093258 | -1,89E+00 | -3,1076441   | 1,42E+00  | 2,33E-01 | 5,50E-01 | Gm22929 | 0,27 | No  |
| ENSMUSG00000093262 | 2,25E-01  | -2,497641169 | 6,33E-02  | 8,01E-01 | 9,61E-01 | Gm23413 | 1,17 | No  |
| ENSMUSG00000093264 | -1,22E-02 | 6,250859404  | 3,63E-02  | 8,49E-01 | 9,88E-01 | Gm23419 | 0,99 | No  |
| ENSMUSG00000093270 | 7,31E-01  | -1,195812483 | 2,70E+00  | 1,01E-01 | 3,92E-01 | Mir5134 | 1,66 | No  |
| ENSMUSG00000093273 | -7,09E-02 | 3,55424408   | 5,18E-01  | 4,72E-01 | 7,60E-01 | Mir3064 | 0,95 | No  |
| ENSMUSG00000093277 | 1,68E+00  | -2,929338895 | 1,39E+00  | 2,39E-01 | 5,50E-01 | Gm26236 | 3,21 | No  |
| ENSMUSG00000093278 | -3,83E-02 | -3,107651936 | -7,91E-11 | 1,00E+00 | 1,00E+00 | Mir5110 | 0,97 | No  |
| ENSMUSG00000093280 | 6,78E-03  | -0,387662555 | 3,93E-04  | 9,84E-01 | 1,00E+00 | Mir2861 | 1,00 | No  |
| ENSMUSG00000093282 | -1,22E+00 | -3,107642107 | 7,04E-01  | 4,02E-01 | 7,00E-01 | Gm22566 | 0,43 | No  |
| ENSMUSG00000093283 | -2,63E-02 | -3,033641358 | 2,33E-04  | 9,88E-01 | 1,00E+00 | Gm22567 | 0,98 | No  |
| ENSMUSG00000093286 | -3,18E+00 | -2,896082478 | 4,25E+00  | 3,93E-02 | 2,35E-01 | Gm22569 | 0,11 | No  |
| ENSMUSG00000093289 | -8,22E-01 | -2,896137491 | 3,70E-01  | 5,43E-01 | 8,12E-01 | Snord92 | 0,57 | No  |
| ENSMUSG00000093290 | -6,46E-01 | -2,472867117 | 3,98E-01  | 5,28E-01 | 8,04E-01 | Mir3572 | 0,64 | No  |
| ENSMUSG00000093302 | -1,87E+00 | -3,107637761 | 1,39E+00  | 2,38E-01 | 5,50E-01 | Gm23801 | 0,27 | No  |
| ENSMUSG00000093306 | -6,40E-02 | -2,35565431  | 4,70E-03  | 9,45E-01 | 1,00E+00 | Gm23802 | 0,96 | No  |
| ENSMUSG00000093314 | -4,52E-01 | -2,660152419 | 2,18E-01  | 6,41E-01 | 8,70E-01 | Mir5136 | 0,73 | No  |
| ENSMUSG00000093315 | 5,17E-01  | 5,383085539  | 5,30E+01  | 3,38E-13 | 4,41E-11 | Mir5114 | 1,43 | Yes |
| ENSMUSG00000093323 | 6,46E-01  | -3,03362481  | 1,67E-01  | 6,83E-01 | 8,95E-01 | Gm24970 | 1,56 | No  |
| ENSMUSG00000093327 | -2,68E-02 | 8,47077652   | 2,17E-01  | 6,41E-01 | 8,71E-01 | Mir5107 | 0,98 | No  |
| ENSMUSG00000093334 | 1,87E+00  | -3,107639691 | 1,38E+00  | 2,40E-01 | 5,50E-01 | Gm22118 | 3,67 | No  |
| ENSMUSG00000093336 | -2,63E-02 | -3,033641358 | 2,33E-04  | 9,88E-01 | 1,00E+00 | Mir1954 | 0,98 | No  |
| ENSMUSG00000093341 | -1,94E+00 | -3,107619243 | 1,50E+00  | 2,21E-01 | 5,50E-01 | Gm26116 | 0,26 | No  |
| ENSMUSG00000093345 | -3,83E-02 | -3,107651936 | -7,91E-11 | 1,00E+00 | 1,00E+00 | Gm27956 | 0,97 | No  |
| ENSMUSG00000093346 | -2,76E-01 | -1,574136294 | 2,66E-01  | 6,06E-01 | 8,49E-01 | Gm26115 | 0,83 | No  |
| ENSMUSG00000093348 | 2,87E-02  | -0,605182119 | 6,08E-03  | 9,38E-01 | 1,00E+00 | Mir3101 | 1,02 | No  |
| ENSMUSG00000093352 | -1,06E+00 | -1,448631832 | 3,22E+00  | 7,25E-02 | 3,42E-01 | Gm23291 | 0,48 | No  |
| ENSMUSG00000093355 | -5,44E-01 | -2,464655726 | 3,13E-01  | 5,76E-01 | 8,34E-01 | Snora26 | 0,69 | No  |
| ENSMUSG00000093358 | 1,90E+00  | -2,655177606 | 2,68E+00  | 1,02E-01 | 3,94E-01 | Mir3063 | 3,72 | No  |
| ENSMUSG00000093359 | 2,74E-02  | -3,033621357 | 9,16E-12  | 1,00E+00 | 1,00E+00 | Gm23292 | 1,02 | No  |
| ENSMUSG00000093363 | -2,63E-02 | -3,033653157 | 2,33E-04  | 9,88E-01 | 1,00E+00 | Gm22002 | 0,98 | No  |
| ENSMUSG00000093365 | -1,39E-01 | 6,536370694  | 4,94E+00  | 2,62E-02 | 1,81E-01 | Gm22801 | 0,91 | No  |
| ENSMUSG00000093378 | -1,44E-01 | 2,305147134  | 1,13E+00  | 2,88E-01 | 5,83E-01 | Gm20663 | 0,91 | No  |

|                    |           |              |          |          |          |               |      |     |
|--------------------|-----------|--------------|----------|----------|----------|---------------|------|-----|
| ENSMUSG00000093384 | -1,60E-01 | 4,793271799  | 4,41E+00 | 3,58E-02 | 2,24E-01 | Gm20689       | 0,89 | No  |
| ENSMUSG00000093385 | -1,87E+00 | -3,107637761 | 1,39E+00 | 2,38E-01 | 5,50E-01 | A330044P14Rik | 0,27 | No  |
| ENSMUSG00000093387 | 2,78E-01  | -2,674081703 | 5,77E-02 | 8,10E-01 | 9,66E-01 | Gm20732       | 1,21 | No  |
| ENSMUSG00000093388 | -4,25E-02 | -2,600673825 | 1,65E-03 | 9,68E-01 | 1,00E+00 | Gm22655       | 0,97 | No  |
| ENSMUSG00000093390 | -9,41E-01 | -2,107592501 | 1,48E+00 | 2,24E-01 | 5,50E-01 | Gm20652       | 0,52 | No  |
| ENSMUSG00000093392 | -2,85E-02 | 6,46798939   | 2,05E-01 | 6,51E-01 | 8,76E-01 | Gm6061        | 0,98 | No  |
| ENSMUSG00000093394 | -8,62E-01 | -2,89616149  | 4,08E-01 | 5,23E-01 | 8,01E-01 | Gm20621       | 0,55 | No  |
| ENSMUSG00000093402 | -4,21E-02 | 4,50789042   | 2,71E-01 | 6,02E-01 | 8,48E-01 | Gm18588       | 0,97 | No  |
| ENSMUSG00000093403 | 1,89E+00  | -3,033614598 | 1,38E+00 | 2,40E-01 | 5,50E-01 | Mir5616       | 3,70 | No  |
| ENSMUSG00000093404 | 2,93E-01  | -2,548200189 | 8,76E-02 | 7,67E-01 | 9,40E-01 | Gm25190       | 1,23 | No  |
| ENSMUSG00000093409 | 2,91E-01  | -1,587411351 | 2,45E-01 | 6,20E-01 | 8,57E-01 | Gm25193       | 1,22 | No  |
| ENSMUSG00000093413 | -6,42E-02 | -2,497590808 | 4,24E-03 | 9,48E-01 | 1,00E+00 | Snora15       | 0,96 | No  |
| ENSMUSG00000093419 | 4,04E-01  | 0,167902644  | 2,28E+00 | 1,31E-01 | 4,55E-01 | Gm19898       | 1,32 | No  |
| ENSMUSG00000093424 | -2,32E-01 | 0,82416021   | 1,18E+00 | 2,78E-01 | 5,74E-01 | 6330562C20Rik | 0,85 | No  |
| ENSMUSG00000093429 | -8,11E-01 | -1,832051027 | 1,56E+00 | 2,11E-01 | 5,50E-01 | Vmn1r-ps145   | 0,57 | No  |
| ENSMUSG00000093437 | -7,38E-02 | -3,033659033 | 2,66E-03 | 9,59E-01 | 1,00E+00 | Gm20702       | 0,95 | No  |
| ENSMUSG00000093441 | -1,49E+00 | -2,997992759 | 1,04E+00 | 3,07E-01 | 6,04E-01 | Mir5710       | 0,36 | No  |
| ENSMUSG00000093443 | 5,54E-01  | -2,832036883 | 2,03E-01 | 6,52E-01 | 8,77E-01 | Gm22871       | 1,47 | No  |
| ENSMUSG00000093445 | -1,06E-01 | 6,3449715    | 2,78E+00 | 9,53E-02 | 3,86E-01 | Lrch4         | 0,93 | No  |
| ENSMUSG00000093447 | -1,89E+00 | -3,1076441   | 1,42E+00 | 2,33E-01 | 5,50E-01 | Gm5139        | 0,27 | No  |
| ENSMUSG00000093452 | 7,36E-02  | 0,826653651  | 1,14E-01 | 7,35E-01 | 9,24E-01 | Zfhx2os       | 1,05 | No  |
| ENSMUSG00000093456 | -9,41E-02 | 3,83340618   | 1,07E+00 | 3,01E-01 | 5,97E-01 | Gm20662       | 0,94 | No  |
| ENSMUSG00000093465 | -7,96E-01 | -2,770552153 | 3,50E-01 | 5,54E-01 | 8,20E-01 | Gm20682       | 0,58 | No  |
| ENSMUSG00000093467 | 2,10E-01  | 3,036792251  | 3,61E+00 | 5,73E-02 | 2,95E-01 | Gm20659       | 1,16 | No  |
| ENSMUSG00000093476 | -7,07E-01 | -0,587243036 | 3,89E+00 | 4,84E-02 | 2,65E-01 | Gm22355       | 0,61 | No  |
| ENSMUSG00000093483 | -2,76E-01 | 0,83190576   | 1,50E+00 | 2,20E-01 | 5,50E-01 | AA465934      | 0,83 | No  |
| ENSMUSG00000093484 | 2,69E-02  | 0,46122481   | 1,18E-02 | 9,14E-01 | 1,00E+00 | Gm20657       | 1,02 | No  |
| ENSMUSG00000093485 | -4,13E-01 | 4,154677462  | 2,29E+01 | 1,67E-06 | 6,96E-05 | Gm20708       | 0,75 | Yes |
| ENSMUSG00000093489 | -1,89E+00 | -3,1076441   | 1,42E+00 | 2,33E-01 | 5,50E-01 | Gm20625       | 0,27 | No  |
| ENSMUSG00000093492 | -1,89E+00 | -3,1076441   | 1,42E+00 | 2,33E-01 | 5,50E-01 | Gm20651       | 0,27 | No  |
| ENSMUSG00000093495 | -1,72E+00 | -2,831988067 | 2,06E+00 | 1,51E-01 | 4,92E-01 | Gm23368       | 0,30 | No  |
| ENSMUSG00000093498 | 1,20E+00  | -3,146123991 | 6,74E-01 | 4,12E-01 | 7,07E-01 | Mir5615-2     | 2,30 | No  |

|                    |           |              |           |          |          |               |  |      |     |
|--------------------|-----------|--------------|-----------|----------|----------|---------------|--|------|-----|
| ENSMUSG00000093505 | -2,71E-01 | 1,024063767  | 1,89E+00  | 1,69E-01 | 5,25E-01 | Gm20691       |  | 0,83 | No  |
| ENSMUSG00000093507 | 1,05E-01  | -2,03362172  | 2,16E-02  | 8,83E-01 | 1,00E+00 | Gm20627       |  | 1,08 | No  |
| ENSMUSG00000093511 | -2,75E-01 | -1,401289012 | 2,74E-01  | 6,01E-01 | 8,47E-01 | Gm20680       |  | 0,83 | No  |
| ENSMUSG00000093514 | -2,84E-01 | 4,421458312  | 1,20E+01  | 5,25E-04 | 9,53E-03 | Gm28727       |  | 0,82 | Yes |
| ENSMUSG00000093515 | -2,52E-01 | -1,195664846 | 2,59E-01  | 6,11E-01 | 8,52E-01 | Mir1231       |  | 0,84 | No  |
| ENSMUSG00000093525 | -2,92E-01 | -1,548076642 | 2,59E-01  | 6,11E-01 | 8,52E-01 | Gm8974        |  | 0,82 | No  |
| ENSMUSG00000093529 | 3,03E-01  | -2,015775094 | 1,80E-01  | 6,71E-01 | 8,89E-01 | Gm25397       |  | 1,23 | No  |
| ENSMUSG00000093536 | -1,68E+00 | -2,548201133 | 3,12E+00  | 7,74E-02 | 3,55E-01 | Smim17        |  | 0,31 | No  |
| ENSMUSG00000093537 | -1,56E-02 | 0,621947628  | 4,07E-03  | 9,49E-01 | 1,00E+00 | Gm7584        |  | 0,99 | No  |
| ENSMUSG00000093538 | -3,83E-02 | -3,107651936 | -7,91E-11 | 1,00E+00 | 1,00E+00 | Gm20711       |  | 0,97 | No  |
| ENSMUSG00000093541 | 2,57E+00  | -3,0336723   | 2,56E+00  | 1,10E-01 | 4,06E-01 | Gm20660       |  | 5,96 | No  |
| ENSMUSG00000093543 | -2,70E-02 | -0,683016017 | 5,02E-03  | 9,44E-01 | 1,00E+00 | Gm8473        |  | 0,98 | No  |
| ENSMUSG00000093545 | 6,70E-02  | 3,424076955  | 4,36E-01  | 5,09E-01 | 7,93E-01 | Gm5871        |  | 1,05 | No  |
| ENSMUSG00000093548 | -8,67E-02 | -2,89613315  | 3,24E-03  | 9,55E-01 | 1,00E+00 | Gm6407        |  | 0,94 | No  |
| ENSMUSG00000093552 | 1,91E+00  | -2,711743683 | 2,71E+00  | 9,96E-02 | 3,92E-01 | Gm5777        |  | 3,75 | No  |
| ENSMUSG00000093553 | -7,78E-02 | 1,96005177   | 2,55E-01  | 6,14E-01 | 8,53E-01 | Gm20633       |  | 0,95 | No  |
| ENSMUSG00000093559 | -7,03E-01 | -2,750861933 | 4,03E-01  | 5,26E-01 | 8,03E-01 | Gm20705       |  | 0,61 | No  |
| ENSMUSG00000093560 | -9,81E-02 | 3,844910366  | 1,14E+00  | 2,86E-01 | 5,82E-01 | Gm6695        |  | 0,93 | No  |
| ENSMUSG00000093562 | -4,18E-01 | -2,863693272 | 1,08E-01  | 7,42E-01 | 9,28E-01 | Gm23090       |  | 0,75 | No  |
| ENSMUSG00000093565 | -4,71E-01 | -0,669091503 | 1,56E+00  | 2,11E-01 | 5,50E-01 | Rab26os       |  | 0,72 | No  |
| ENSMUSG00000093571 | -1,26E+00 | -1,641316206 | 3,76E+00  | 5,26E-02 | 2,79E-01 | Gm24757       |  | 0,42 | No  |
| ENSMUSG00000093574 | 5,85E-02  | 4,668658965  | 5,56E-01  | 4,56E-01 | 7,45E-01 | Gm20671       |  | 1,04 | No  |
| ENSMUSG00000093575 | 5,70E-02  | 2,974911978  | 2,49E-01  | 6,18E-01 | 8,55E-01 | Gm20695       |  | 1,04 | No  |
| ENSMUSG00000093577 | 3,60E-02  | 2,737461477  | 8,77E-02  | 7,67E-01 | 9,40E-01 | Gm20632       |  | 1,03 | No  |
| ENSMUSG00000093579 | -8,18E-01 | -0,896016668 | 3,31E+00  | 6,90E-02 | 3,31E-01 | Gm20036       |  | 0,57 | No  |
| ENSMUSG00000093589 | -6,73E-02 | -2,770645215 | 3,07E-03  | 9,56E-01 | 1,00E+00 | Gm18367       |  | 0,95 | No  |
| ENSMUSG00000093593 | 8,15E-02  | 3,479269353  | 6,74E-01  | 4,12E-01 | 7,07E-01 | Gm20683       |  | 1,06 | No  |
| ENSMUSG00000093594 | -6,29E-02 | 3,125147569  | 3,41E-01  | 5,59E-01 | 8,22E-01 | Gm20707       |  | 0,96 | No  |
| ENSMUSG00000093598 | 2,36E-01  | 2,528065357  | 3,28E+00  | 7,01E-02 | 3,34E-01 | A730085K08Rik |  | 1,18 | No  |
| ENSMUSG00000093599 | 5,23E-01  | -2,268097941 | 3,39E-01  | 5,61E-01 | 8,24E-01 | Mir5620       |  | 1,44 | No  |
| ENSMUSG00000093601 | -1,86E+00 | -3,033612668 | 1,39E+00  | 2,38E-01 | 5,50E-01 | Gm19459       |  | 0,28 | No  |
| ENSMUSG00000093606 | 3,79E-01  | -2,146181848 | 2,29E-01  | 6,32E-01 | 8,64E-01 | B130034C11Rik |  | 1,30 | No  |

|                    |           |              |           |          |          |               |      |     |
|--------------------|-----------|--------------|-----------|----------|----------|---------------|------|-----|
| ENSMUSG00000093614 | -7,22E-02 | -2,401407539 | 5,97E-03  | 9,38E-01 | 1,00E+00 | Gm20693       | 0,95 | No  |
| ENSMUSG00000093615 | -4,46E-01 | -1,107549272 | 1,06E+00  | 3,03E-01 | 6,00E-01 | Mir5618       | 0,73 | No  |
| ENSMUSG00000093619 | -6,31E-02 | -2,963274299 | 1,81E-03  | 9,66E-01 | 1,00E+00 | 4930535L15Rik | 0,96 | No  |
| ENSMUSG00000093622 | -1,74E-01 | 0,502755951  | 4,84E-01  | 4,86E-01 | 7,74E-01 | Gm20703       | 0,89 | No  |
| ENSMUSG00000093624 | -3,83E-02 | -3,107651936 | -7,91E-11 | 1,00E+00 | 1,00E+00 | Mipep-ps      | 0,97 | No  |
| ENSMUSG00000093625 | 1,47E-01  | 0,915859853  | 4,80E-01  | 4,88E-01 | 7,75E-01 | Gm18953       | 1,11 | No  |
| ENSMUSG00000093628 | 4,24E-02  | -3,033592245 | -1,17E-09 | 1,00E+00 | 1,00E+00 | Gm20616       | 1,03 | No  |
| ENSMUSG00000093629 | 1,14E-01  | -0,289523139 | 1,29E-01  | 7,20E-01 | 9,15E-01 | Prox2os       | 1,08 | No  |
| ENSMUSG00000093637 | 3,59E-01  | 0,014905585  | 1,48E+00  | 2,24E-01 | 5,50E-01 | Gm20636       | 1,28 | No  |
| ENSMUSG00000093639 | 1,85E+00  | -3,107657832 | 1,35E+00  | 2,46E-01 | 5,50E-01 | Gm42419       | 3,61 | No  |
| ENSMUSG00000093645 | -8,27E-02 | 0,697026952  | 1,29E-01  | 7,19E-01 | 9,15E-01 | Gm23187       | 0,94 | No  |
| ENSMUSG00000093651 | 2,75E-01  | 4,510982618  | 1,15E+01  | 6,93E-04 | 1,20E-02 | Gm5873        | 1,21 | Yes |
| ENSMUSG00000093656 | -6,33E-01 | -1,627583725 | 1,22E+00  | 2,69E-01 | 5,65E-01 | Gm20628       | 0,64 | No  |
| ENSMUSG00000093661 | 7,25E-02  | 5,113527054  | 9,86E-01  | 3,21E-01 | 6,21E-01 | Eif4e3        | 1,05 | No  |
| ENSMUSG00000093662 | 2,06E-02  | -3,146103739 | -9,26E-10 | 1,00E+00 | 1,00E+00 | Gm20649       | 1,01 | No  |
| ENSMUSG00000093668 | -9,68E-01 | -2,14599554  | 1,44E+00  | 2,30E-01 | 5,50E-01 | Pou5f2        | 0,51 | No  |
| ENSMUSG00000093669 | 5,06E-01  | -0,641409374 | 1,81E+00  | 1,78E-01 | 5,38E-01 | Gm9399        | 1,42 | No  |
| ENSMUSG00000093671 | 7,16E-02  | -1,155889633 | 2,51E-02  | 8,74E-01 | 1,00E+00 | Gm20656       | 1,05 | No  |
| ENSMUSG00000093672 | 6,11E-01  | -1,247084771 | 1,65E+00  | 1,99E-01 | 5,50E-01 | Gm20655       | 1,53 | No  |
| ENSMUSG00000093673 | -5,97E-01 | -2,711698272 | 2,80E-01  | 5,97E-01 | 8,45E-01 | Gm20644       | 0,66 | No  |
| ENSMUSG00000093674 | -6,39E-02 | 9,118013333  | 1,26E+00  | 2,61E-01 | 5,54E-01 | Rpl41         | 0,96 | No  |
| ENSMUSG00000093677 | 2,46E-02  | 2,520859583  | 3,58E-02  | 8,50E-01 | 9,89E-01 | Gm20712       | 1,02 | No  |
| ENSMUSG00000093682 | -8,56E-01 | -2,832005432 | 4,01E-01  | 5,26E-01 | 8,03E-01 | Gm20681       | 0,55 | No  |
| ENSMUSG00000093684 | 1,84E+00  | -3,033632273 | 1,33E+00  | 2,49E-01 | 5,50E-01 | Gm27857       | 3,58 | No  |
| ENSMUSG00000093686 | -4,47E-01 | 5,390518364  | 4,05E+01  | 2,00E-10 | 1,82E-08 | Gm4705        | 0,73 | Yes |
| ENSMUSG00000093688 | 6,78E-01  | -2,832060811 | 2,51E-01  | 6,17E-01 | 8,55E-01 | Gm8488        | 1,60 | No  |
| ENSMUSG00000093690 | -1,76E+00 | -2,770586288 | 2,15E+00  | 1,43E-01 | 4,78E-01 | Mir5619       | 0,30 | No  |
| ENSMUSG00000093695 | 5,66E-02  | -0,116867438 | 3,33E-02  | 8,55E-01 | 9,92E-01 | Gm20717       | 1,04 | No  |
| ENSMUSG00000093697 | -3,83E-02 | -3,107651936 | -7,91E-11 | 1,00E+00 | 1,00E+00 | Gm20686       | 0,97 | No  |
| ENSMUSG00000093701 | -4,12E-02 | 4,624839639  | 2,76E-01  | 6,00E-01 | 8,46E-01 | Gm21970       | 0,97 | No  |
| ENSMUSG00000093710 | 4,34E-01  | 2,146815632  | 8,60E+00  | 3,36E-03 | 4,17E-02 | Mir5625       | 1,35 | Yes |
| ENSMUSG00000093716 | -1,89E+00 | -3,033648118 | 1,42E+00  | 2,33E-01 | 5,50E-01 | Gm19815       | 0,27 | No  |

|                    |           |              |           |          |          |               |      |     |
|--------------------|-----------|--------------|-----------|----------|----------|---------------|------|-----|
| ENSMUSG00000093720 | -1,26E+00 | -2,711740326 | 1,25E+00  | 2,64E-01 | 5,58E-01 | Gm20635       | 0,42 | No  |
| ENSMUSG00000093722 | 1,32E-01  | 0,760765956  | 3,32E-01  | 5,65E-01 | 8,27E-01 | Gm20612       | 1,10 | No  |
| ENSMUSG00000093726 | 6,41E-01  | 0,244154528  | 5,94E+00  | 1,48E-02 | 1,25E-01 | Gm20667       | 1,56 | No  |
| ENSMUSG00000093730 | -1,35E-01 | -2,481280742 | 1,82E-02  | 8,93E-01 | 1,00E+00 | Gm20690       | 0,91 | No  |
| ENSMUSG00000093734 | 4,24E-02  | 1,343234267  | 5,41E-02  | 8,16E-01 | 9,69E-01 | Gm25082       | 1,03 | No  |
| ENSMUSG00000093738 | -6,34E-02 | -2,831987709 | 2,72E-03  | 9,58E-01 | 1,00E+00 | AI606473      | 0,96 | No  |
| ENSMUSG00000093739 | -2,06E-01 | -1,033688987 | 2,39E-01  | 6,25E-01 | 8,59E-01 | Gm20692       | 0,87 | No  |
| ENSMUSG00000093740 | -8,44E-01 | -2,600598512 | 3,91E-01  | 5,32E-01 | 8,06E-01 | Gm18417       | 0,56 | No  |
| ENSMUSG00000093746 | 7,15E-01  | -2,896163419 | 2,78E-01  | 5,98E-01 | 8,45E-01 | Mir5622       | 1,64 | No  |
| ENSMUSG00000093748 | 4,32E-01  | -0,929316604 | 1,03E+00  | 3,10E-01 | 6,09E-01 | Gm19031       | 1,35 | No  |
| ENSMUSG00000093749 | 2,02E-01  | -2,740864439 | 2,98E-02  | 8,63E-01 | 9,97E-01 | 4921523L03Rik | 1,15 | No  |
| ENSMUSG00000093752 | 2,25E-02  | 5,355379386  | 1,04E-01  | 7,47E-01 | 9,30E-01 | Gm20716       | 1,02 | No  |
| ENSMUSG00000093753 | 1,02E+00  | -2,896141004 | 4,53E-01  | 5,01E-01 | 7,86E-01 | Gm28577       | 2,03 | No  |
| ENSMUSG00000093756 | -7,38E-02 | -3,033659033 | 2,66E-03  | 9,59E-01 | 1,00E+00 | Gm18594       | 0,95 | No  |
| ENSMUSG00000093757 | 8,47E-01  | -2,355530503 | 8,62E-01  | 3,53E-01 | 6,54E-01 | Mir5623       | 1,80 | No  |
| ENSMUSG00000093758 | -2,79E-02 | -2,89614703  | 4,02E-04  | 9,84E-01 | 1,00E+00 | Gm20701       | 0,98 | No  |
| ENSMUSG00000093759 | 1,79E+00  | -3,033666867 | 1,28E+00  | 2,58E-01 | 5,50E-01 | Scarletltr    | 3,46 | No  |
| ENSMUSG00000093763 | -2,70E+00 | -2,770580449 | 2,89E+00  | 8,89E-02 | 3,79E-01 | Mir5626       | 0,15 | No  |
| ENSMUSG00000093765 | 3,00E-01  | 4,1878222    | 1,21E+01  | 4,99E-04 | 9,16E-03 | Gm20658       | 1,23 | Yes |
| ENSMUSG00000093768 | -6,55E-02 | 3,348989198  | 4,06E-01  | 5,24E-01 | 8,01E-01 | Gm20650       | 0,96 | No  |
| ENSMUSG00000093769 | 3,77E-01  | 0,821492892  | 2,83E+00  | 9,26E-02 | 3,83E-01 | Hist2h3c1     | 1,30 | No  |
| ENSMUSG00000093772 | 9,68E-04  | 0,103810009  | 1,30E-05  | 9,97E-01 | 1,00E+00 | 4931403E22Rik | 1,00 | No  |
| ENSMUSG00000093779 | 3,14E-02  | -3,107617333 | -7,69E-10 | 1,00E+00 | 1,00E+00 | Gm20648       | 1,02 | No  |
| ENSMUSG00000093780 | 1,03E+00  | -2,80098442  | 6,17E-01  | 4,32E-01 | 7,26E-01 | Gm22395       | 2,04 | No  |
| ENSMUSG00000093782 | -5,96E-02 | -0,407249898 | 3,11E-02  | 8,60E-01 | 9,95E-01 | Gm22396       | 0,96 | No  |
| ENSMUSG00000093784 | -7,14E-01 | -2,998022511 | 2,04E-01  | 6,51E-01 | 8,77E-01 | Gm22394       | 0,61 | No  |
| ENSMUSG00000093789 | -7,62E-02 | -1,300246802 | 2,13E-02  | 8,84E-01 | 1,00E+00 | Methig1       | 0,95 | No  |
| ENSMUSG00000093791 | -8,56E-01 | -2,832011372 | 4,01E-01  | 5,26E-01 | 8,03E-01 | Gm24092       | 0,55 | No  |
| ENSMUSG00000093793 | 3,01E-01  | -1,726270899 | 2,14E-01  | 6,43E-01 | 8,72E-01 | Gm24091       | 1,23 | No  |
| ENSMUSG00000093798 | -8,20E-02 | 8,784621229  | 2,06E+00  | 1,51E-01 | 4,92E-01 | Gm8355        | 0,94 | No  |
| ENSMUSG00000093800 | 1,23E-01  | 1,247658761  | 4,18E-01  | 5,18E-01 | 7,98E-01 | Gm20796       | 1,09 | No  |
| ENSMUSG00000093801 | -1,87E+00 | -3,107637761 | 1,39E+00  | 2,38E-01 | 5,50E-01 | Trav14n-2     | 0,27 | No  |



|                    |           |              |           |          |          |             |      |     |
|--------------------|-----------|--------------|-----------|----------|----------|-------------|------|-----|
| ENSMUSG00000093803 | 7,35E-02  | 4,769629253  | 9,05E-01  | 3,41E-01 | 6,42E-01 | Ppp2r3d     | 1,05 | No  |
| ENSMUSG00000093805 | -9,46E-01 | -0,366764736 | 8,82E+00  | 2,98E-03 | 3,81E-02 | Gal3st2b    | 0,52 | Yes |
| ENSMUSG00000093807 | 7,16E-01  | -2,896133101 | 2,78E-01  | 5,98E-01 | 8,45E-01 | Gm23620     | 1,64 | No  |
| ENSMUSG00000093815 | -5,23E-02 | -2,96326211  | 1,25E-03  | 9,72E-01 | 1,00E+00 | Gm26444     | 0,96 | No  |
| ENSMUSG00000093816 | -2,39E-01 | 0,566040707  | 1,03E+00  | 3,11E-01 | 6,11E-01 | Gm26445     | 0,85 | No  |
| ENSMUSG00000093826 | -9,66E-02 | 5,237838572  | 1,81E+00  | 1,78E-01 | 5,38E-01 | Gm6900      | 0,94 | No  |
| ENSMUSG00000093829 | 6,98E-01  | -1,333214289 | 1,76E+00  | 1,85E-01 | 5,49E-01 | Gm24798     | 1,62 | No  |
| ENSMUSG00000093839 | 2,67E+00  | -3,033636951 | 2,76E+00  | 9,68E-02 | 3,88E-01 | Olfr462     | 6,36 | No  |
| ENSMUSG00000093843 | -5,99E-02 | -2,963282181 | -7,02E-11 | 1,00E+00 | 1,00E+00 | Gm25939     | 0,96 | No  |
| ENSMUSG00000093849 | 3,14E-02  | -3,107617333 | -7,69E-10 | 1,00E+00 | 1,00E+00 | Gm7083      | 1,02 | No  |
| ENSMUSG00000093856 | -1,55E+00 | -2,740849145 | 1,59E+00  | 2,07E-01 | 5,50E-01 | Gm24311     | 0,34 | No  |
| ENSMUSG00000093858 | -1,81E+00 | -1,401214995 | 9,45E+00  | 2,12E-03 | 2,93E-02 | Gm19967     | 0,29 | Yes |
| ENSMUSG00000093861 | -3,17E+00 | -2,770569219 | 4,23E+00  | 3,97E-02 | 2,36E-01 | Igkv1-110   | 0,11 | No  |
| ENSMUSG00000093862 | -1,01E-01 | 3,345926937  | 9,57E-01  | 3,28E-01 | 6,29E-01 | Gm5117      | 0,93 | No  |
| ENSMUSG00000093865 | -1,89E+00 | -3,1076441   | 1,42E+00  | 2,33E-01 | 5,50E-01 | Lrit3       | 0,27 | No  |
| ENSMUSG00000093867 | -5,63E-01 | -2,832039284 | 2,48E-01  | 6,18E-01 | 8,56E-01 | Gsdmcl2     | 0,68 | No  |
| ENSMUSG00000093873 | -3,77E-02 | -2,497574621 | 1,61E-03  | 9,68E-01 | 1,00E+00 | Gm24540     | 0,97 | No  |
| ENSMUSG00000093874 | -1,28E+00 | -2,49755683  | 2,19E+00  | 1,39E-01 | 4,70E-01 | Gm24539     | 0,41 | No  |
| ENSMUSG00000093880 | 1,36E-01  | 2,879729259  | 1,36E+00  | 2,44E-01 | 5,50E-01 | Tmem181c-ps | 1,10 | No  |
| ENSMUSG00000093885 | -2,23E-01 | 4,686978904  | 8,23E+00  | 4,12E-03 | 4,84E-02 | Rpl35a-ps5  | 0,86 | Yes |
| ENSMUSG00000093887 | -1,87E+00 | -3,107637761 | 1,39E+00  | 2,38E-01 | 5,50E-01 | Gm3033      | 0,27 | No  |
| ENSMUSG00000093893 | -5,77E-01 | -2,800978064 | 2,62E-01  | 6,09E-01 | 8,51E-01 | n-R5s124    | 0,67 | No  |
| ENSMUSG00000093894 | -1,91E+00 | -2,896158411 | 1,45E+00  | 2,28E-01 | 5,50E-01 | Ighv1-53    | 0,27 | No  |
| ENSMUSG00000093896 | -1,87E+00 | -3,107637761 | 1,39E+00  | 2,38E-01 | 5,50E-01 | Ighv1-76    | 0,27 | No  |
| ENSMUSG00000093897 | 1,83E-01  | -0,41297904  | 2,65E-01  | 6,07E-01 | 8,50E-01 | Gm26268     | 1,14 | No  |
| ENSMUSG00000093898 | -2,68E+00 | -3,033645766 | 2,84E+00  | 9,17E-02 | 3,82E-01 | Gm3629      | 0,16 | No  |
| ENSMUSG00000093901 | -1,89E+00 | -3,1076441   | 1,42E+00  | 2,33E-01 | 5,50E-01 | Olfr893     | 0,27 | No  |
| ENSMUSG00000093904 | -1,67E-02 | 5,656389359  | 6,03E-02  | 8,06E-01 | 9,64E-01 | Tomm20      | 0,99 | No  |
| ENSMUSG00000093908 | 4,38E-01  | -1,896256636 | 5,29E-01  | 4,67E-01 | 7,55E-01 | Gm5784      | 1,35 | No  |
| ENSMUSG00000093909 | 1,87E+00  | -3,107639691 | 1,38E+00  | 2,40E-01 | 5,50E-01 | Gm3883      | 3,67 | No  |
| ENSMUSG00000093910 | 6,89E-01  | -2,185634521 | 6,88E-01  | 4,07E-01 | 7,03E-01 | Zfp853      | 1,61 | No  |
| ENSMUSG00000093912 | -5,24E-02 | -2,963245194 | 1,25E-03  | 9,72E-01 | 1,00E+00 | Mir3470b    | 0,96 | No  |

|                    |           |              |           |          |          |            |      |     |
|--------------------|-----------|--------------|-----------|----------|----------|------------|------|-----|
| ENSMUSG00000093919 | 1,10E+00  | -0,662304936 | 7,86E+00  | 5,06E-03 | 5,64E-02 | Gm20760    | 2,14 | No  |
| ENSMUSG00000093921 | 1,87E+00  | -3,107639691 | 1,38E+00  | 2,40E-01 | 5,50E-01 | Gm23864    | 3,67 | No  |
| ENSMUSG00000093924 | -4,85E-01 | 0,828755703  | 4,48E+00  | 3,43E-02 | 2,18E-01 | Gm12623    | 0,71 | No  |
| ENSMUSG00000093930 | 3,75E-01  | 6,598905309  | 3,62E+01  | 1,78E-09 | 1,40E-07 | Hmgcs1     | 1,30 | Yes |
| ENSMUSG00000093933 | -7,75E-01 | -2,185580625 | 1,22E+00  | 2,68E-01 | 5,65E-01 | Gm25526    | 0,58 | No  |
| ENSMUSG00000093938 | 1,24E-01  | 6,387994881  | 3,85E+00  | 4,97E-02 | 2,69E-01 | Evi2b      | 1,09 | No  |
| ENSMUSG00000093942 | -2,63E-02 | -3,033641358 | 2,33E-04  | 9,88E-01 | 1,00E+00 | Olfra46    | 0,98 | No  |
| ENSMUSG00000093954 | 1,75E-01  | 2,339790751  | 1,64E+00  | 2,00E-01 | 5,50E-01 | Gm16867    | 1,13 | No  |
| ENSMUSG00000093956 | -1,37E+00 | -2,896104443 | 1,18E+00  | 2,78E-01 | 5,74E-01 | Gm24497    | 0,39 | No  |
| ENSMUSG00000093963 | -2,05E-01 | -1,997990616 | 1,13E-01  | 7,37E-01 | 9,25E-01 | Gm21909    | 0,87 | No  |
| ENSMUSG00000093967 | 7,45E-01  | -2,832031801 | 3,02E-01  | 5,83E-01 | 8,38E-01 | Gm26180    | 1,68 | No  |
| ENSMUSG00000093969 | -1,87E+00 | -2,963257051 | 1,41E+00  | 2,35E-01 | 5,50E-01 | Trav4n-4   | 0,27 | No  |
| ENSMUSG00000093973 | -1,87E+00 | -3,107637761 | 1,39E+00  | 2,38E-01 | 5,50E-01 | Mrgpra2a   | 0,27 | No  |
| ENSMUSG00000093975 | 3,14E-02  | -3,107617333 | -7,69E-10 | 1,00E+00 | 1,00E+00 | Vmn2r-ps19 | 1,02 | No  |
| ENSMUSG00000093978 | -2,10E-01 | -0,268065507 | 4,56E-01  | 4,99E-01 | 7,85E-01 | Gm12612    | 0,86 | No  |
| ENSMUSG00000093979 | -9,18E-01 | -2,070127448 | 1,80E+00  | 1,80E-01 | 5,41E-01 | Gm2237     | 0,53 | No  |
| ENSMUSG00000093985 | -3,83E-02 | -3,107651936 | -7,91E-11 | 1,00E+00 | 1,00E+00 | Gm10406    | 0,97 | No  |
| ENSMUSG00000093989 | 9,90E-02  | 5,302489315  | 1,94E+00  | 1,63E-01 | 5,14E-01 | Rnasek     | 1,07 | No  |
| ENSMUSG00000093992 | -7,56E-01 | -2,355598138 | 6,40E-01  | 4,24E-01 | 7,18E-01 | Gm26427    | 0,59 | No  |
| ENSMUSG00000094003 | -2,00E+00 | -2,627638178 | 2,11E+00  | 1,47E-01 | 4,85E-01 | n-R5s128   | 0,25 | No  |
| ENSMUSG00000094006 | 1,87E+00  | -3,107639691 | 1,38E+00  | 2,40E-01 | 5,50E-01 | Igkv4-59   | 3,67 | No  |
| ENSMUSG00000094013 | 3,90E-01  | -2,401455662 | 2,43E-01  | 6,22E-01 | 8,58E-01 | Gm25829    | 1,31 | No  |
| ENSMUSG00000094017 | -8,23E-02 | 3,11649416   | 5,66E-01  | 4,52E-01 | 7,41E-01 | Gm13160    | 0,94 | No  |
| ENSMUSG00000094027 | -2,04E+00 | -2,655049374 | 3,15E+00  | 7,59E-02 | 3,51E-01 | Gm21762    | 0,24 | No  |
| ENSMUSG00000094030 | -1,87E+00 | -3,03364178  | 1,41E+00  | 2,36E-01 | 5,50E-01 | Gm21833    | 0,27 | No  |
| ENSMUSG00000094041 | 7,72E-01  | -2,89613394  | 3,26E-01  | 5,68E-01 | 8,30E-01 | Gm28019    | 1,71 | No  |
| ENSMUSG00000094050 | -2,95E-02 | -2,831980372 | 4,69E-04  | 9,83E-01 | 1,00E+00 | Gm23472    | 0,98 | No  |
| ENSMUSG00000094051 | 3,14E-02  | -3,107617333 | -7,69E-10 | 1,00E+00 | 1,00E+00 | Ighv1-36   | 1,02 | No  |
| ENSMUSG00000094075 | -1,85E+00 | -2,896060155 | 1,39E+00  | 2,38E-01 | 5,50E-01 | Ighv1-80   | 0,28 | No  |
| ENSMUSG00000094076 | 2,07E-02  | 0,083159917  | 5,47E-03  | 9,41E-01 | 1,00E+00 | Gm4767     | 1,01 | No  |
| ENSMUSG00000094082 | 7,41E-02  | -0,366964415 | 4,97E-02  | 8,24E-01 | 9,73E-01 | Gm12452    | 1,05 | No  |
| ENSMUSG00000094083 | 3,01E-01  | -2,600680368 | 9,19E-02  | 7,62E-01 | 9,38E-01 | Gm1604a    | 1,23 | No  |

|                    |           |              |           |          |          |                |      |     |
|--------------------|-----------|--------------|-----------|----------|----------|----------------|------|-----|
| ENSMUSG00000094088 | -2,74E+00 | -3,033596063 | 2,99E+00  | 8,38E-02 | 3,71E-01 | Ighv1-64       | 0,15 | No  |
| ENSMUSG00000094090 | -1,27E-01 | 5,380090711  | 3,32E+00  | 6,85E-02 | 3,29E-01 | Gm8494         | 0,92 | No  |
| ENSMUSG00000094091 | 2,23E-01  | -1,863696528 | 1,27E-01  | 7,22E-01 | 9,16E-01 | Gm21885        | 1,17 | No  |
| ENSMUSG00000094092 | -4,55E-01 | -0,640945128 | 1,42E+00  | 2,33E-01 | 5,50E-01 | Gm15921        | 0,73 | No  |
| ENSMUSG00000094094 | -1,87E+00 | -3,107637761 | 1,39E+00  | 2,38E-01 | 5,50E-01 | Igkv5-45       | 0,27 | No  |
| ENSMUSG00000094097 | -1,51E+00 | -2,831988201 | 1,51E+00  | 2,20E-01 | 5,50E-01 | n-R5s111       | 0,35 | No  |
| ENSMUSG00000094102 | -3,15E+00 | -2,963239677 | 4,17E+00  | 4,13E-02 | 2,41E-01 | Ighv9-2        | 0,11 | No  |
| ENSMUSG00000094103 | -3,88E-01 | 5,896026941  | 3,48E+01  | 3,72E-09 | 2,76E-07 | 1700047I17Rik2 | 0,76 | Yes |
| ENSMUSG00000094105 | 9,01E-03  | -3,107646452 | -5,16E-10 | 1,00E+00 | 1,00E+00 | Gm8922         | 1,01 | No  |
| ENSMUSG00000094108 | 3,76E-01  | -2,070185125 | 3,41E-01  | 5,59E-01 | 8,22E-01 | Gm17258        | 1,30 | No  |
| ENSMUSG00000094111 | -7,23E-03 | 3,345236975  | 4,91E-03  | 9,44E-01 | 1,00E+00 | Nutf2-ps2      | 1,00 | No  |
| ENSMUSG00000094112 | 7,93E-01  | -1,711783544 | 1,54E+00  | 2,14E-01 | 5,50E-01 | 9330182O14Rik  | 1,73 | No  |
| ENSMUSG00000094117 | -3,55E+00 | -2,8319919   | 5,65E+00  | 1,74E-02 | 1,38E-01 | Igkv3-12       | 0,09 | No  |
| ENSMUSG00000094122 | -1,59E-01 | 6,614632127  | 6,57E+00  | 1,03E-02 | 9,58E-02 | Rpl31-ps9      | 0,90 | No  |
| ENSMUSG00000094125 | 9,33E-02  | 1,325965066  | 2,58E-01  | 6,11E-01 | 8,52E-01 | Gm13698        | 1,07 | No  |
| ENSMUSG00000094127 | 4,58E-02  | 2,309614495  | 1,13E-01  | 7,37E-01 | 9,25E-01 | G530012D18Rik  | 1,03 | No  |
| ENSMUSG00000094131 | -1,87E+00 | -3,107637761 | 1,39E+00  | 2,38E-01 | 5,50E-01 | Gm22265        | 0,27 | No  |
| ENSMUSG00000094133 | -2,65E+00 | -3,033633091 | 2,78E+00  | 9,55E-02 | 3,86E-01 | Olfr1431       | 0,16 | No  |
| ENSMUSG00000094145 | -1,87E+00 | -3,107637761 | 1,39E+00  | 2,38E-01 | 5,50E-01 | Vmn2r20        | 0,27 | No  |
| ENSMUSG00000094152 | -1,63E-01 | -0,424884938 | 2,78E-01  | 5,98E-01 | 8,45E-01 | Slc6a16        | 0,89 | No  |
| ENSMUSG00000094153 | 2,63E+00  | -2,96325892  | 2,67E+00  | 1,02E-01 | 3,94E-01 | Gm8807         | 6,19 | No  |
| ENSMUSG00000094154 | 1,84E+00  | -2,896172987 | 1,33E+00  | 2,49E-01 | 5,50E-01 | Gm23266        | 3,58 | No  |
| ENSMUSG00000094158 | 2,36E+00  | -2,401472659 | 4,73E+00  | 2,96E-02 | 1,97E-01 | Gm23264        | 5,12 | No  |
| ENSMUSG00000094167 | 1,22E+00  | -3,070170666 | 6,80E-01  | 4,10E-01 | 7,06E-01 | Gm10580        | 2,33 | No  |
| ENSMUSG00000094174 | 9,01E-03  | -3,107646452 | -5,16E-10 | 1,00E+00 | 1,00E+00 | Ighv6-4        | 1,01 | No  |
| ENSMUSG00000094175 | -7,38E-02 | -3,033634644 | 2,66E-03  | 9,59E-01 | 1,00E+00 | Gm24427        | 0,95 | No  |
| ENSMUSG00000094178 | 2,65E+00  | -3,033655087 | 2,73E+00  | 9,86E-02 | 3,91E-01 | n-R5s118       | 6,30 | No  |
| ENSMUSG00000094179 | -6,66E-01 | -1,885290206 | 1,13E+00  | 2,87E-01 | 5,83E-01 | Snord50b       | 0,63 | No  |
| ENSMUSG00000094185 | 7,55E-01  | -2,896158401 | 3,11E-01  | 5,77E-01 | 8,35E-01 | Gm5445         | 1,69 | No  |
| ENSMUSG00000094189 | 3,14E-02  | -3,107617333 | -7,69E-10 | 1,00E+00 | 1,00E+00 | Gm6134         | 1,02 | No  |
| ENSMUSG00000094191 | -2,33E-01 | 3,237115796  | 4,80E+00  | 2,85E-02 | 1,91E-01 | Rpl31-ps14     | 0,85 | No  |
| ENSMUSG00000094198 | -6,33E-02 | -2,832004618 | 2,72E-03  | 9,58E-01 | 1,00E+00 | Ighv1-50       | 0,96 | No  |

|                    |           |              |           |          |          |            |      |     |
|--------------------|-----------|--------------|-----------|----------|----------|------------|------|-----|
| ENSMUSG00000094199 | -1,98E-02 | -3,033655952 | 2,83E-11  | 1,00E+00 | 1,00E+00 | Gm25450    | 0,99 | No  |
| ENSMUSG00000094201 | -9,50E-01 | -2,770604363 | 7,92E-01  | 3,74E-01 | 6,75E-01 | Gm25064    | 0,52 | No  |
| ENSMUSG00000094205 | -1,94E+00 | -3,107619243 | 1,50E+00  | 2,21E-01 | 5,50E-01 | Gm8926     | 0,26 | No  |
| ENSMUSG00000094210 | 4,14E-01  | 0,470925806  | 2,79E+00  | 9,50E-02 | 3,86E-01 | Gm23450    | 1,33 | No  |
| ENSMUSG00000094215 | 3,04E-01  | -0,879919972 | 6,09E-01  | 4,35E-01 | 7,28E-01 | Gm6489     | 1,23 | No  |
| ENSMUSG00000094229 | -7,21E-01 | -2,548190432 | 5,81E-01  | 4,46E-01 | 7,37E-01 | Gm22969    | 0,61 | No  |
| ENSMUSG00000094230 | -1,89E+00 | -3,1076441   | 1,42E+00  | 2,33E-01 | 5,50E-01 | Gm21847    | 0,27 | No  |
| ENSMUSG00000094242 | -1,65E-02 | 5,877723473  | 6,18E-02  | 8,04E-01 | 9,62E-01 | Gm5456     | 0,99 | No  |
| ENSMUSG00000094244 | -1,94E+00 | -3,107619243 | 1,50E+00  | 2,21E-01 | 5,50E-01 | Gm23967    | 0,26 | No  |
| ENSMUSG00000094245 | -2,46E-01 | -1,86357693  | 1,19E-01  | 7,30E-01 | 9,21E-01 | Gm23966    | 0,84 | No  |
| ENSMUSG00000094248 | 4,04E-01  | -1,497668164 | 6,01E-01  | 4,38E-01 | 7,31E-01 | Hist1h2ao  | 1,32 | No  |
| ENSMUSG00000094251 | 1,13E+00  | -1,963236991 | 2,57E+00  | 1,09E-01 | 4,04E-01 | Gm25632    | 2,18 | No  |
| ENSMUSG00000094256 | -1,29E+00 | -0,816334644 | 8,81E+00  | 3,00E-03 | 3,83E-02 | Rpl21-ps7  | 0,41 | Yes |
| ENSMUSG00000094257 | -1,04E-03 | 4,561597946  | 1,71E-04  | 9,90E-01 | 1,00E+00 | Ap3s1-ps2  | 1,00 | No  |
| ENSMUSG00000094263 | 7,42E-01  | -1,986571973 | 1,13E+00  | 2,88E-01 | 5,84E-01 | Snord50a   | 1,67 | No  |
| ENSMUSG00000094270 | 1,21E+00  | -3,07015885  | 6,74E-01  | 4,12E-01 | 7,07E-01 | Gm22291    | 2,31 | No  |
| ENSMUSG00000094271 | -8,69E-01 | -2,800975948 | 5,35E-01  | 4,65E-01 | 7,53E-01 | Gm13290    | 0,55 | No  |
| ENSMUSG00000094278 | -8,40E-03 | -1,42882156  | 2,41E-04  | 9,88E-01 | 1,00E+00 | Gm12626    | 0,99 | No  |
| ENSMUSG00000094281 | 7,28E-01  | -1,561305393 | 1,85E+00  | 1,74E-01 | 5,32E-01 | Gm8034     | 1,66 | No  |
| ENSMUSG00000094282 | 3,49E-01  | -1,669113349 | 3,58E-01  | 5,50E-01 | 8,17E-01 | Cfap73     | 1,27 | No  |
| ENSMUSG00000094286 | -3,07E-02 | -2,831951673 | 4,99E-04  | 9,82E-01 | 1,00E+00 | Gm12424    | 0,98 | No  |
| ENSMUSG00000094293 | 1,81E+00  | -3,10765737  | 1,28E+00  | 2,58E-01 | 5,50E-01 | Gm3893     | 3,49 | No  |
| ENSMUSG00000094306 | -1,70E+00 | -2,267988704 | 4,37E+00  | 3,65E-02 | 2,27E-01 | Gm24924    | 0,31 | No  |
| ENSMUSG00000094320 | -1,55E-01 | 5,124517768  | 4,54E+00  | 3,31E-02 | 2,13E-01 | Chchd2-ps  | 0,90 | No  |
| ENSMUSG00000094326 | -7,22E-02 | 3,822028482  | 6,15E-01  | 4,33E-01 | 7,26E-01 | Gm10045    | 0,95 | No  |
| ENSMUSG00000094334 | -2,12E-01 | 3,919123583  | 5,56E+00  | 1,84E-02 | 1,43E-01 | Fabp5l2    | 0,86 | No  |
| ENSMUSG00000094335 | 1,62E-03  | -2,963242114 | -1,56E-12 | 1,00E+00 | 1,00E+00 | Igkv1-117  | 1,00 | No  |
| ENSMUSG00000094336 | 7,37E-02  | 1,187704889  | 1,39E-01  | 7,09E-01 | 9,09E-01 | Gm13693    | 1,05 | No  |
| ENSMUSG00000094338 | -8,04E-01 | 0,062542367  | 7,86E+00  | 5,06E-03 | 5,64E-02 | Hist1h2bl  | 0,57 | No  |
| ENSMUSG00000094344 | -8,70E-02 | 6,863867107  | 2,02E+00  | 1,56E-01 | 5,00E-01 | Gm11942    | 0,94 | No  |
| ENSMUSG00000094345 | -1,94E+00 | -3,107619243 | 1,50E+00  | 2,21E-01 | 5,50E-01 | Igkv14-126 | 0,26 | No  |
| ENSMUSG00000094347 | -9,48E-02 | -2,711718734 | 5,98E-03  | 9,38E-01 | 1,00E+00 | Olf784     | 0,94 | No  |

|                    |           |              |           |          |          |               |      |    |
|--------------------|-----------|--------------|-----------|----------|----------|---------------|------|----|
| ENSMUSG00000094359 | 1,81E+00  | -3,10765737  | 1,28E+00  | 2,58E-01 | 5,50E-01 | Gm25571       | 3,49 | No |
| ENSMUSG00000094365 | -4,34E-02 | 5,680702829  | 4,13E-01  | 5,21E-01 | 7,99E-01 | Gm21982       | 0,97 | No |
| ENSMUSG00000094367 | 2,29E-01  | -2,355630445 | 6,57E-02  | 7,98E-01 | 9,59E-01 | Gm26058       | 1,17 | No |
| ENSMUSG00000094370 | -8,21E-01 | -2,963266074 | 3,67E-01  | 5,45E-01 | 8,13E-01 | Gm3373        | 0,57 | No |
| ENSMUSG00000094372 | 2,33E-01  | -0,190615394 | 5,14E-01  | 4,74E-01 | 7,62E-01 | Gm21839       | 1,17 | No |
| ENSMUSG00000094374 | 1,38E-01  | 1,938726112  | 8,54E-01  | 3,55E-01 | 6,57E-01 | Gm5435        | 1,10 | No |
| ENSMUSG00000094377 | -8,51E-01 | -2,107627902 | 1,30E+00  | 2,54E-01 | 5,50E-01 | Gm24407       | 0,55 | No |
| ENSMUSG00000094382 | 8,75E-02  | -2,107696849 | 1,68E-02  | 8,97E-01 | 1,00E+00 | Gm22192       | 1,06 | No |
| ENSMUSG00000094388 | 1,03E-01  | 3,915487948  | 1,30E+00  | 2,53E-01 | 5,50E-01 | Gm8783        | 1,07 | No |
| ENSMUSG00000094392 | -8,00E-02 | 6,082722454  | 1,52E+00  | 2,18E-01 | 5,50E-01 | Gm3788        | 0,95 | No |
| ENSMUSG00000094394 | -3,83E-02 | -3,107651936 | -7,91E-11 | 1,00E+00 | 1,00E+00 | Gm23402       | 0,97 | No |
| ENSMUSG00000094403 | -5,06E-02 | 3,049638426  | 2,02E-01  | 6,53E-01 | 8,78E-01 | Mir692-2      | 0,97 | No |
| ENSMUSG00000094405 | -1,87E+00 | -2,963234282 | 1,41E+00  | 2,35E-01 | 5,50E-01 | Gm23143       | 0,27 | No |
| ENSMUSG00000094410 | -3,88E-02 | 6,795599815  | 3,97E-01  | 5,29E-01 | 8,04E-01 | Gm38394       | 0,97 | No |
| ENSMUSG00000094411 | -8,91E-02 | 1,269240046  | 2,02E-01  | 6,53E-01 | 8,78E-01 | Snord16a      | 0,94 | No |
| ENSMUSG00000094417 | 3,15E-02  | 0,851738934  | 2,14E-02  | 8,84E-01 | 1,00E+00 | Gm13243       | 1,02 | No |
| ENSMUSG00000094420 | 3,07E+00  | -2,963298475 | 3,83E+00  | 5,02E-02 | 2,72E-01 | Igkv10-96     | 8,41 | No |
| ENSMUSG00000094421 | 2,61E+00  | -3,033672762 | 2,63E+00  | 1,05E-01 | 3,97E-01 | Gm20778       | 6,10 | No |
| ENSMUSG00000094430 | 3,14E-02  | -3,107617333 | -7,69E-10 | 1,00E+00 | 1,00E+00 | Gm933         | 1,02 | No |
| ENSMUSG00000094433 | 1,81E+00  | -3,10765737  | 1,28E+00  | 2,58E-01 | 5,50E-01 | Igkv5-43      | 3,49 | No |
| ENSMUSG00000094435 | -6,77E-02 | -2,770651153 | 3,11E-03  | 9,56E-01 | 1,00E+00 | Gm23617       | 0,95 | No |
| ENSMUSG00000094437 | -1,07E-01 | 3,761709008  | 1,29E+00  | 2,55E-01 | 5,50E-01 | Gm9830        | 0,93 | No |
| ENSMUSG00000094439 | 8,55E-02  | 3,429016347  | 7,14E-01  | 3,98E-01 | 6,98E-01 | Gm21969       | 1,06 | No |
| ENSMUSG00000094441 | -1,73E-01 | 2,9863996    | 2,31E+00  | 1,29E-01 | 4,50E-01 | Zfp955a       | 0,89 | No |
| ENSMUSG00000094446 | -1,28E-01 | 5,069525799  | 3,04E+00  | 8,14E-02 | 3,66E-01 | Gm6344        | 0,92 | No |
| ENSMUSG00000094447 | -7,44E-02 | -2,424838876 | 6,35E-03  | 9,37E-01 | 1,00E+00 | 9430069I07Rik | 0,95 | No |
| ENSMUSG00000094452 | -1,14E-02 | -3,033635021 | 1,50E-05  | 9,97E-01 | 1,00E+00 | Gm22623       | 0,99 | No |
| ENSMUSG00000094463 | 5,12E-02  | 3,106303232  | 2,16E-01  | 6,42E-01 | 8,71E-01 | Gm8546        | 1,04 | No |
| ENSMUSG00000094472 | 2,60E+00  | -2,963275374 | 2,63E+00  | 1,05E-01 | 3,97E-01 | Gm21897       | 6,08 | No |
| ENSMUSG00000094475 | 1,70E-01  | 0,580050677  | 4,58E-01  | 4,98E-01 | 7,84E-01 | Gm11007       | 1,12 | No |
| ENSMUSG00000094477 | -1,87E+00 | -3,107637761 | 1,39E+00  | 2,38E-01 | 5,50E-01 | Gm23064       | 0,27 | No |
| ENSMUSG00000094478 | 9,01E-03  | -3,107646452 | -5,16E-10 | 1,00E+00 | 1,00E+00 | Igkv3-3       | 1,01 | No |

|                    |           |              |          |          |          |               |      |    |
|--------------------|-----------|--------------|----------|----------|----------|---------------|------|----|
| ENSMUSG00000094483 | -6,15E-03 | 7,788344403  | 1,10E-02 | 9,16E-01 | 1,00E+00 | Purb          | 1,00 | No |
| ENSMUSG00000094487 | -4,33E-01 | -0,006886227 | 2,25E+00 | 1,34E-01 | 4,60E-01 | Gm21958       | 0,74 | No |
| ENSMUSG00000094493 | 9,93E-01  | -1,497601204 | 2,91E+00 | 8,78E-02 | 3,79E-01 | Olfr700       | 1,99 | No |
| ENSMUSG00000094496 | -1,89E+00 | -3,1076441   | 1,42E+00 | 2,33E-01 | 5,50E-01 | Olfr792       | 0,27 | No |
| ENSMUSG00000094497 | -5,28E-02 | 4,483036584  | 4,20E-01 | 5,17E-01 | 7,98E-01 | Gm8210        | 0,96 | No |
| ENSMUSG00000094498 | 7,50E-01  | -2,863727412 | 3,06E-01 | 5,80E-01 | 8,37E-01 | Gm10582       | 1,68 | No |
| ENSMUSG00000094500 | -1,08E-01 | -2,896148415 | 8,40E-03 | 9,27E-01 | 1,00E+00 | Smim18        | 0,93 | No |
| ENSMUSG00000094502 | -1,90E+00 | -2,963239763 | 1,44E+00 | 2,31E-01 | 5,50E-01 | Ighv1-69      | 0,27 | No |
| ENSMUSG00000094504 | 7,41E-01  | -2,963225026 | 3,00E-01 | 5,84E-01 | 8,38E-01 | Gm5294        | 1,67 | No |
| ENSMUSG00000094505 | 3,13E+00  | -2,963281267 | 4,01E+00 | 4,53E-02 | 2,54E-01 | Ighv8-6       | 8,78 | No |
| ENSMUSG00000094509 | -1,87E+00 | -3,107637761 | 1,39E+00 | 2,38E-01 | 5,50E-01 | Ighv14-1      | 0,27 | No |
| ENSMUSG00000094523 | 1,86E+00  | -3,033661846 | 1,35E+00 | 2,46E-01 | 5,50E-01 | Gm22913       | 3,62 | No |
| ENSMUSG00000094526 | -4,10E-01 | -2,070083876 | 3,50E-01 | 5,54E-01 | 8,20E-01 | Gm21451       | 0,75 | No |
| ENSMUSG00000094530 | 2,92E-02  | 8,980548175  | 2,63E-01 | 6,08E-01 | 8,50E-01 | Gm21399       | 1,02 | No |
| ENSMUSG00000094534 | 1,87E+00  | -3,03364371  | 1,36E+00 | 2,43E-01 | 5,50E-01 | Gm20945       | 3,66 | No |
| ENSMUSG00000094546 | 2,66E+00  | -2,963252223 | 2,74E+00 | 9,80E-02 | 3,91E-01 | Ighv1-26      | 6,34 | No |
| ENSMUSG00000094551 | -4,08E-01 | -0,080872666 | 1,72E+00 | 1,90E-01 | 5,50E-01 | Gm22392       | 0,75 | No |
| ENSMUSG00000094557 | -5,86E-02 | -1,015577636 | 1,77E-02 | 8,94E-01 | 1,00E+00 | Rpl35a-ps7    | 0,96 | No |
| ENSMUSG00000094562 | -4,08E-02 | -2,963255775 | 7,59E-04 | 9,78E-01 | 1,00E+00 | Trav13-4-dv7  | 0,97 | No |
| ENSMUSG00000094566 | -2,21E-01 | 0,732509409  | 9,43E-01 | 3,32E-01 | 6,32E-01 | Gm12620       | 0,86 | No |
| ENSMUSG00000094568 | -1,74E-01 | 5,026814554  | 5,60E+00 | 1,80E-02 | 1,41E-01 | Smarge1-ps1   | 0,89 | No |
| ENSMUSG00000094572 | 1,87E+00  | -3,107639691 | 1,38E+00 | 2,40E-01 | 5,50E-01 | Gm23550       | 3,67 | No |
| ENSMUSG00000094593 | 1,87E+00  | -3,03364371  | 1,36E+00 | 2,43E-01 | 5,50E-01 | Gm24744       | 3,66 | No |
| ENSMUSG00000094594 | 1,15E-01  | 4,280213828  | 1,83E+00 | 1,76E-01 | 5,35E-01 | Tpd52-ps      | 1,08 | No |
| ENSMUSG00000094595 | 2,51E-01  | 1,5752343    | 2,09E+00 | 1,49E-01 | 4,89E-01 | Fsbp          | 1,19 | No |
| ENSMUSG00000094597 | -3,84E-01 | 1,75850987   | 5,54E+00 | 1,86E-02 | 1,44E-01 | Gm4810        | 0,77 | No |
| ENSMUSG00000094613 | -1,94E+00 | -3,107619243 | 1,50E+00 | 2,21E-01 | 5,50E-01 | A630076J17Rik | 0,26 | No |
| ENSMUSG00000094615 | -3,70E-01 | 2,069265985  | 5,96E+00 | 1,46E-02 | 1,23E-01 | Gm4899        | 0,77 | No |
| ENSMUSG00000094618 | 2,75E-01  | -2,655138578 | 8,66E-02 | 7,69E-01 | 9,41E-01 | Gm13271       | 1,21 | No |
| ENSMUSG00000094619 | -2,68E+00 | -3,033645766 | 2,84E+00 | 9,17E-02 | 3,82E-01 | Trav14d-3-dv8 | 0,16 | No |
| ENSMUSG00000094622 | 3,30E-02  | 1,210197383  | 2,85E-02 | 8,66E-01 | 9,99E-01 | Gm3055        | 1,02 | No |
| ENSMUSG00000094626 | 8,61E-02  | -1,600646521 | 1,81E-02 | 8,93E-01 | 1,00E+00 | Cecr6         | 1,06 | No |

|                    |           |              |          |          |          |               |      |     |
|--------------------|-----------|--------------|----------|----------|----------|---------------|------|-----|
| ENSMUSG00000094627 | 1,82E-01  | 4,54406743   | 5,14E+00 | 2,33E-02 | 1,67E-01 | Gm10182       | 1,13 | No  |
| ENSMUSG00000094630 | 1,87E+00  | -3,107639691 | 1,38E+00 | 2,40E-01 | 5,50E-01 | n-R5s92       | 3,67 | No  |
| ENSMUSG00000094634 | -1,89E+00 | -3,1076441   | 1,42E+00 | 2,33E-01 | 5,50E-01 | Gm3468        | 0,27 | No  |
| ENSMUSG00000094635 | -3,46E-01 | -1,683004322 | 3,06E-01 | 5,80E-01 | 8,37E-01 | Gm7104        | 0,79 | No  |
| ENSMUSG00000094638 | 4,19E-02  | 2,857148064  | 1,27E-01 | 7,21E-01 | 9,16E-01 | Gm21972       | 1,03 | No  |
| ENSMUSG00000094648 | 1,87E+00  | -3,033632735 | 1,36E+00 | 2,43E-01 | 5,50E-01 | Gm13287       | 3,66 | No  |
| ENSMUSG00000094649 | 1,37E-01  | -0,136240692 | 1,86E-01 | 6,67E-01 | 8,86E-01 | Gm7102        | 1,10 | No  |
| ENSMUSG00000094650 | -5,90E-01 | -2,711655797 | 2,73E-01 | 6,01E-01 | 8,47E-01 | Gm25361       | 0,66 | No  |
| ENSMUSG00000094651 | -1,53E+00 | 0,01128785   | 2,95E+01 | 5,66E-08 | 3,32E-06 | Gal3st2       | 0,35 | Yes |
| ENSMUSG00000094655 | -1,27E+00 | -2,600629358 | 1,54E+00 | 2,15E-01 | 5,50E-01 | Gm25360       | 0,42 | No  |
| ENSMUSG00000094657 | 4,27E-01  | -2,740880856 | 1,42E-01 | 7,06E-01 | 9,08E-01 | n-R5s142      | 1,34 | No  |
| ENSMUSG00000094664 | -2,56E-01 | 5,96414343   | 1,52E+01 | 9,60E-05 | 2,34E-03 | Rpl35a-ps6    | 0,84 | Yes |
| ENSMUSG00000094665 | -1,86E+00 | -2,896118354 | 1,41E+00 | 2,36E-01 | 5,50E-01 | Gm24873       | 0,27 | No  |
| ENSMUSG00000094668 | -1,36E+00 | -2,770595802 | 1,16E+00 | 2,82E-01 | 5,78E-01 | Gm24871       | 0,39 | No  |
| ENSMUSG00000094683 | 3,29E-02  | 5,306548723  | 2,16E-01 | 6,42E-01 | 8,71E-01 | Ap3m1-ps      | 1,02 | No  |
| ENSMUSG00000094685 | 7,73E-02  | 4,869369356  | 1,04E+00 | 3,07E-01 | 6,05E-01 | Gm5900        | 1,06 | No  |
| ENSMUSG00000094690 | 8,49E-01  | -2,401414124 | 8,68E-01 | 3,52E-01 | 6,53E-01 | 1600014C23Rik | 1,80 | No  |
| ENSMUSG00000094703 | -2,72E+00 | -2,831981503 | 2,93E+00 | 8,68E-02 | 3,78E-01 | Gm24486       | 0,15 | No  |
| ENSMUSG00000094707 | -1,59E-02 | -2,96323932  | 1,18E-04 | 9,91E-01 | 1,00E+00 | A830019P07Rik | 0,99 | No  |
| ENSMUSG00000094708 | 9,98E-02  | 7,556234933  | 2,84E+00 | 9,17E-02 | 3,82E-01 | Gm10359       | 1,07 | No  |
| ENSMUSG00000094710 | -7,77E-02 | -2,896170175 | 2,63E-03 | 9,59E-01 | 1,00E+00 | Gm22823       | 0,95 | No  |
| ENSMUSG00000094713 | -7,42E-01 | -2,497574083 | 6,17E-01 | 4,32E-01 | 7,26E-01 | Gm22822       | 0,60 | No  |
| ENSMUSG00000094720 | -3,20E-01 | -2,683179798 | 8,72E-02 | 7,68E-01 | 9,41E-01 | n-R5s100      | 0,80 | No  |
| ENSMUSG00000094724 | -4,66E-01 | 5,779608045  | 4,88E+01 | 2,88E-12 | 3,30E-10 | Rnaset2b      | 0,72 | Yes |
| ENSMUSG00000094733 | 1,89E+00  | -3,033614598 | 1,38E+00 | 2,40E-01 | 5,50E-01 | Gm5416        | 3,70 | No  |
| ENSMUSG00000094737 | -6,14E-02 | 4,314823165  | 5,33E-01 | 4,65E-01 | 7,54E-01 | Gm17045       | 0,96 | No  |
| ENSMUSG00000094751 | -1,13E+00 | -2,832004194 | 9,55E-01 | 3,28E-01 | 6,29E-01 | Gm25018       | 0,46 | No  |
| ENSMUSG00000094758 | -1,87E+00 | -3,107637761 | 1,39E+00 | 2,38E-01 | 5,50E-01 | Trav13d-2     | 0,27 | No  |
| ENSMUSG00000094760 | -4,01E-02 | -2,963238858 | 7,31E-04 | 9,78E-01 | 1,00E+00 | n-R5s139      | 0,97 | No  |
| ENSMUSG00000094763 | 1,87E+00  | -2,896149381 | 1,36E+00 | 2,44E-01 | 5,50E-01 | Gm1647        | 3,65 | No  |
| ENSMUSG00000094768 | -5,25E-02 | -3,033661434 | 4,08E-11 | 1,00E+00 | 1,00E+00 | Gm25524       | 0,96 | No  |
| ENSMUSG00000094772 | -1,52E-01 | 2,527352855  | 1,38E+00 | 2,40E-01 | 5,50E-01 | Rpl29-ps2     | 0,90 | No  |

|                    |           |              |           |          |          |               |      |     |
|--------------------|-----------|--------------|-----------|----------|----------|---------------|------|-----|
| ENSMUSG00000094777 | 1,24E+00  | -1,69748393  | 4,42E+00  | 3,56E-02 | 2,24E-01 | Hist1h2ap     | 2,37 | No  |
| ENSMUSG00000094786 | 5,84E-02  | -0,074920912 | 3,90E-02  | 8,43E-01 | 9,85E-01 | Gm14403       | 1,04 | No  |
| ENSMUSG00000094787 | -3,83E-02 | -3,107651936 | -7,91E-11 | 1,00E+00 | 1,00E+00 | lghv1-54      | 0,97 | No  |
| ENSMUSG00000094796 | 4,05E-01  | 1,612566367  | 5,77E+00  | 1,63E-02 | 1,33E-01 | BC147527      | 1,32 | No  |
| ENSMUSG00000094797 | -8,19E-01 | -2,963254278 | 3,66E-01  | 5,45E-01 | 8,13E-01 | Igkv6-15      | 0,57 | No  |
| ENSMUSG00000094800 | -5,88E-02 | -3,033616507 | 1,62E-03  | 9,68E-01 | 1,00E+00 | Gm9780        | 0,96 | No  |
| ENSMUSG00000094801 | 1,48E-01  | -2,74083225  | 1,85E-02  | 8,92E-01 | 1,00E+00 | n-R5s113      | 1,11 | No  |
| ENSMUSG00000094806 | -1,05E-01 | -2,896124038 | 8,00E-03  | 9,29E-01 | 1,00E+00 | Cyp2d10       | 0,93 | No  |
| ENSMUSG00000094812 | -1,89E+00 | -3,1076441   | 1,42E+00  | 2,33E-01 | 5,50E-01 | Gm22614       | 0,27 | No  |
| ENSMUSG00000094814 | 5,97E-03  | -3,1461183   | -3,40E-10 | 1,00E+00 | 1,00E+00 | Gm21973       | 1,00 | No  |
| ENSMUSG00000094815 | -5,98E-02 | -2,831989889 | 2,41E-03  | 9,61E-01 | 1,00E+00 | Gm22615       | 0,96 | No  |
| ENSMUSG00000094817 | 9,01E-03  | -3,107646452 | -5,16E-10 | 1,00E+00 | 1,00E+00 | Cphx3         | 1,01 | No  |
| ENSMUSG00000094825 | -3,83E-02 | -3,107651936 | -7,91E-11 | 1,00E+00 | 1,00E+00 | Gm3194        | 0,97 | No  |
| ENSMUSG00000094826 | 1,33E+00  | -2,448747024 | 1,82E+00  | 1,78E-01 | 5,38E-01 | Gm23804       | 2,52 | No  |
| ENSMUSG00000094840 | 1,36E+00  | -2,497606289 | 1,90E+00  | 1,68E-01 | 5,23E-01 | Muc3a         | 2,57 | No  |
| ENSMUSG00000094841 | -6,88E-02 | -2,896163841 | 2,08E-03  | 9,64E-01 | 1,00E+00 | Gm10610       | 0,95 | No  |
| ENSMUSG00000094843 | -5,39E-01 | -0,079337689 | 3,37E+00  | 6,64E-02 | 3,24E-01 | Ppp1r2-ps1    | 0,69 | No  |
| ENSMUSG00000094845 | 6,68E-02  | -1,655177739 | 1,30E-02  | 9,09E-01 | 1,00E+00 | Tmem95        | 1,05 | No  |
| ENSMUSG00000094849 | -1,14E-02 | -3,033635021 | 1,50E-05  | 9,97E-01 | 1,00E+00 | Vmn2r-ps18    | 0,99 | No  |
| ENSMUSG00000094852 | 1,85E+00  | -3,107657832 | 1,35E+00  | 2,46E-01 | 5,50E-01 | Gm9034        | 3,61 | No  |
| ENSMUSG00000094856 | -8,67E-02 | -2,89613315  | 3,24E-03  | 9,55E-01 | 1,00E+00 | Gm21962       | 0,94 | No  |
| ENSMUSG00000094862 | 2,62E+00  | -3,033654625 | 2,66E+00  | 1,03E-01 | 3,95E-01 | lghv1-56      | 6,16 | No  |
| ENSMUSG00000094865 | 7,70E-01  | -2,801004285 | 4,18E-01  | 5,18E-01 | 7,98E-01 | Gm7426        | 1,71 | No  |
| ENSMUSG00000094870 | 8,42E-02  | 4,972549653  | 1,28E+00  | 2,58E-01 | 5,51E-01 | Zfp131        | 1,06 | No  |
| ENSMUSG00000094872 | 1,21E-02  | -3,033650469 | 7,34E-11  | 1,00E+00 | 1,00E+00 | Igkv9-120     | 1,01 | No  |
| ENSMUSG00000094873 | -2,45E-03 | -0,904514047 | 3,43E-05  | 9,95E-01 | 1,00E+00 | Gm13812       | 1,00 | No  |
| ENSMUSG00000094875 | 1,87E+00  | -3,107639691 | 1,38E+00  | 2,40E-01 | 5,50E-01 | Gm23151       | 3,67 | No  |
| ENSMUSG00000094877 | 1,82E+00  | -2,963253027 | 1,31E+00  | 2,52E-01 | 5,50E-01 | Trav3n-3      | 3,53 | No  |
| ENSMUSG00000094878 | 1,81E+00  | -3,10765737  | 1,28E+00  | 2,58E-01 | 5,50E-01 | Olf130        | 3,49 | No  |
| ENSMUSG00000094884 | -1,57E-01 | -1,33321759  | 1,12E-01  | 7,37E-01 | 9,25E-01 | Olf105-ps     | 0,90 | No  |
| ENSMUSG00000094886 | -1,57E-01 | 2,262032762  | 1,28E+00  | 2,58E-01 | 5,50E-01 | Gm10784       | 0,90 | No  |
| ENSMUSG00000094910 | -1,03E+00 | 0,557360703  | 1,91E+01  | 1,21E-05 | 3,98E-04 | D430019H16Rik | 0,49 | Yes |



|                    |           |              |           |          |          |               |      |     |
|--------------------|-----------|--------------|-----------|----------|----------|---------------|------|-----|
| ENSMUSG00000094916 | -1,23E+00 | -2,448621968 | 1,46E+00  | 2,27E-01 | 5,50E-01 | Gm26391       | 0,42 | No  |
| ENSMUSG00000094918 | 9,01E-03  | -3,107646452 | -5,16E-10 | 1,00E+00 | 1,00E+00 | Gm8765        | 1,01 | No  |
| ENSMUSG00000094920 | 1,87E+00  | -3,107639691 | 1,38E+00  | 2,40E-01 | 5,50E-01 | Gm6605        | 3,67 | No  |
| ENSMUSG00000094929 | -1,87E+00 | -3,107637761 | 1,39E+00  | 2,38E-01 | 5,50E-01 | Gm3526        | 0,27 | No  |
| ENSMUSG00000094930 | -2,68E+00 | -2,896091163 | 2,85E+00  | 9,14E-02 | 3,82E-01 | Igkv6-25      | 0,16 | No  |
| ENSMUSG00000094932 | 1,05E-01  | 0,41586436   | 1,64E-01  | 6,85E-01 | 8,97E-01 | Gm2007        | 1,08 | No  |
| ENSMUSG00000094935 | 2,86E-01  | 1,458307697  | 2,62E+00  | 1,06E-01 | 3,98E-01 | Gm9726        | 1,22 | No  |
| ENSMUSG00000094936 | 1,15E-02  | 3,672859014  | 1,48E-02  | 9,03E-01 | 1,00E+00 | Rbm4          | 1,01 | No  |
| ENSMUSG00000094938 | -2,70E+00 | -3,033614577 | 2,89E+00  | 8,93E-02 | 3,79E-01 | Gm23092       | 0,15 | No  |
| ENSMUSG00000094942 | 7,03E-02  | 1,461528066  | 1,69E-01  | 6,81E-01 | 8,94E-01 | Gm3604        | 1,05 | No  |
| ENSMUSG00000094951 | -1,87E+00 | -3,107637761 | 1,39E+00  | 2,38E-01 | 5,50E-01 | Ighv5-6       | 0,27 | No  |
| ENSMUSG00000094955 | -3,36E-01 | 4,13450389   | 1,49E+01  | 1,15E-04 | 2,72E-03 | Gm3699        | 0,79 | Yes |
| ENSMUSG00000094956 | -3,25E-02 | -2,65510406  | 9,36E-04  | 9,76E-01 | 1,00E+00 | n-R5s122      | 0,98 | No  |
| ENSMUSG00000094958 | -1,18E+00 | -1,669039011 | 3,93E+00  | 4,74E-02 | 2,61E-01 | 3110021N24Rik | 0,44 | No  |
| ENSMUSG00000094959 | -1,89E+00 | -2,627668976 | 2,60E+00  | 1,07E-01 | 3,99E-01 | Gm24112       | 0,27 | No  |
| ENSMUSG00000094965 | 1,84E+00  | -3,033632273 | 1,33E+00  | 2,49E-01 | 5,50E-01 | Gm22416       | 3,58 | No  |
| ENSMUSG00000094968 | 1,85E+00  | -3,107657832 | 1,35E+00  | 2,46E-01 | 5,50E-01 | Gm22419       | 3,61 | No  |
| ENSMUSG00000094969 | -3,88E-03 | -3,03362684  | 4,02E-12  | 1,00E+00 | 1,00E+00 | Gm22420       | 1,00 | No  |
| ENSMUSG00000094973 | -3,51E-02 | 2,671706867  | 8,08E-02  | 7,76E-01 | 9,46E-01 | Gm8994        | 0,98 | No  |
| ENSMUSG00000094974 | -1,99E-01 | 5,314453112  | 7,89E+00  | 4,97E-03 | 5,58E-02 | Rps19-ps2     | 0,87 | No  |
| ENSMUSG00000094977 | -1,87E+00 | -3,033619006 | 1,41E+00  | 2,36E-01 | 5,50E-01 | Gm25256       | 0,27 | No  |
| ENSMUSG00000094985 | -1,94E+00 | -3,107619243 | 1,50E+00  | 2,21E-01 | 5,50E-01 | Topaz1        | 0,26 | No  |
| ENSMUSG00000094989 | -1,93E-01 | 7,277053109  | 1,04E+01  | 1,27E-03 | 1,97E-02 | Rpl9-ps4      | 0,87 | Yes |
| ENSMUSG00000094995 | 1,85E+00  | -3,107657832 | 1,35E+00  | 2,46E-01 | 5,50E-01 | Pate3         | 3,61 | No  |
| ENSMUSG00000095003 | -1,87E+00 | -3,107637761 | 1,39E+00  | 2,38E-01 | 5,50E-01 | Gm25173       | 0,27 | No  |
| ENSMUSG00000095023 | 1,87E+00  | -2,963248007 | 1,36E+00  | 2,44E-01 | 5,50E-01 | Gm24019       | 3,65 | No  |
| ENSMUSG00000095026 | 1,44E+00  | -1,863667371 | 3,83E+00  | 5,04E-02 | 2,72E-01 | Gm3336        | 2,72 | No  |
| ENSMUSG00000095027 | -3,83E-02 | -3,107651936 | -7,91E-11 | 1,00E+00 | 1,00E+00 | Gm24017       | 0,97 | No  |
| ENSMUSG00000095028 | 5,12E-01  | 4,666633038  | 4,16E+01  | 1,10E-10 | 1,04E-08 | Sirpb1b       | 1,43 | Yes |
| ENSMUSG00000095029 | 2,83E-01  | 2,662163511  | 5,20E+00  | 2,26E-02 | 1,64E-01 | Gm21370       | 1,22 | No  |
| ENSMUSG00000095035 | 1,59E+00  | -2,711750516 | 1,74E+00  | 1,87E-01 | 5,50E-01 | Gm22346       | 3,02 | No  |
| ENSMUSG00000095040 | 7,84E-02  | -1,863713843 | 1,36E-02  | 9,07E-01 | 1,00E+00 | 1700001J03Rik | 1,06 | No  |

|                    |           |              |           |          |          |               |       |     |
|--------------------|-----------|--------------|-----------|----------|----------|---------------|-------|-----|
| ENSMUSG00000095042 | 6,85E-02  | 7,346603501  | 1,32E+00  | 2,51E-01 | 5,50E-01 | Gm12537       | 1,05  | No  |
| ENSMUSG00000095054 | 2,19E-01  | 0,378962708  | 7,15E-01  | 3,98E-01 | 6,98E-01 | Gm13146       | 1,16  | No  |
| ENSMUSG00000095061 | -5,99E-02 | -1,929380847 | 5,84E-03  | 9,39E-01 | 1,00E+00 | E030018B13Rik | 0,96  | No  |
| ENSMUSG00000095068 | -3,97E-01 | -1,226373308 | 6,60E-01  | 4,17E-01 | 7,12E-01 | Gm26189       | 0,76  | No  |
| ENSMUSG00000095069 | 3,48E+00  | -2,896200697 | 5,25E+00  | 2,19E-02 | 1,60E-01 | Gm26190       | 11,17 | No  |
| ENSMUSG00000095078 | -1,63E-01 | 1,467916838  | 8,31E-01  | 3,62E-01 | 6,63E-01 | Gm5866        | 0,89  | No  |
| ENSMUSG00000095079 | -2,36E+00 | -1,069657929 | 1,93E+01  | 1,14E-05 | 3,78E-04 | Igha          | 0,20  | Yes |
| ENSMUSG00000095086 | -3,83E-02 | -3,107651936 | -7,91E-11 | 1,00E+00 | 1,00E+00 | Gm25327       | 0,97  | No  |
| ENSMUSG00000095087 | -5,22E-01 | -2,226194291 | 4,36E-01  | 5,09E-01 | 7,92E-01 | Gm25328       | 0,70  | No  |
| ENSMUSG00000095097 | -2,38E+00 | -2,963228295 | 2,20E+00  | 1,38E-01 | 4,69E-01 | Gm23658       | 0,19  | No  |
| ENSMUSG00000095098 | 5,57E-02  | 3,937099928  | 3,77E-01  | 5,39E-01 | 8,09E-01 | Ccdc85b       | 1,04  | No  |
| ENSMUSG00000095101 | -6,69E-01 | -2,929276792 | 1,82E-01  | 6,70E-01 | 8,88E-01 | Gm13285       | 0,63  | No  |
| ENSMUSG00000095105 | -2,95E-01 | -0,155933066 | 9,81E-01  | 3,22E-01 | 6,22E-01 | Edaradd       | 0,81  | No  |
| ENSMUSG00000095111 | -3,11E-01 | -2,71169644  | 7,09E-02  | 7,90E-01 | 9,54E-01 | Gm23713       | 0,81  | No  |
| ENSMUSG00000095115 | 1,59E-01  | 7,870711857  | 7,36E+00  | 6,69E-03 | 6,95E-02 | Itpripl2      | 1,12  | No  |
| ENSMUSG00000095117 | 3,14E-02  | -3,107617333 | -7,69E-10 | 1,00E+00 | 1,00E+00 | Ighv8-9       | 1,02  | No  |
| ENSMUSG00000095118 | 8,02E-02  | -1,424717648 | 2,36E-02  | 8,78E-01 | 1,00E+00 | Snord14d      | 1,06  | No  |
| ENSMUSG00000095119 | 2,08E-01  | -2,627635421 | 3,17E-02  | 8,59E-01 | 9,95E-01 | Gm23711       | 1,16  | No  |
| ENSMUSG00000095123 | -1,53E-01 | 3,129108409  | 2,02E+00  | 1,55E-01 | 4,99E-01 | Gm21781       | 0,90  | No  |
| ENSMUSG00000095129 | -8,31E-01 | -2,831995324 | 3,79E-01  | 5,38E-01 | 8,09E-01 | Gm23217       | 0,56  | No  |
| ENSMUSG00000095130 | 3,14E-02  | -3,107617333 | -7,69E-10 | 1,00E+00 | 1,00E+00 | Ighv1-39      | 1,02  | No  |
| ENSMUSG00000095131 | -1,56E+00 | -2,800971461 | 1,61E+00  | 2,04E-01 | 5,50E-01 | n-R5s110      | 0,34  | No  |
| ENSMUSG00000095132 | -5,77E-01 | -2,655155545 | 2,61E-01  | 6,10E-01 | 8,51E-01 | Rnu6          | 0,67  | No  |
| ENSMUSG00000095142 | -1,94E+00 | -3,107619243 | 1,50E+00  | 2,21E-01 | 5,50E-01 | Gm24389       | 0,26  | No  |
| ENSMUSG00000095146 | -5,88E-02 | -3,033616507 | 1,62E-03  | 9,68E-01 | 1,00E+00 | Gm24387       | 0,96  | No  |
| ENSMUSG00000095159 | 1,58E-01  | 5,871963188  | 5,64E+00  | 1,76E-02 | 1,39E-01 | Tubb4b-ps1    | 1,12  | No  |
| ENSMUSG00000095160 | 9,01E-03  | -3,107646452 | -5,16E-10 | 1,00E+00 | 1,00E+00 | Gm25548       | 1,01  | No  |
| ENSMUSG00000095165 | -5,84E-01 | -2,770605859 | 2,68E-01  | 6,05E-01 | 8,49E-01 | Gm25547       | 0,67  | No  |
| ENSMUSG00000095168 | 6,07E-01  | -2,655129755 | 4,11E-01  | 5,22E-01 | 8,00E-01 | Gm4795        | 1,52  | No  |
| ENSMUSG00000095174 | -1,87E+00 | -3,107637761 | 1,39E+00  | 2,38E-01 | 5,50E-01 | Gm20069       | 0,27  | No  |
| ENSMUSG00000095178 | 4,01E-01  | -2,333173321 | 1,91E-01  | 6,62E-01 | 8,83E-01 | Gm22716       | 1,32  | No  |
| ENSMUSG00000095183 | -2,93E+00 | -2,929260633 | 3,51E+00  | 6,09E-02 | 3,06E-01 | n-R5s138      | 0,13  | No  |

|                    |           |              |           |          |          |               |      |    |
|--------------------|-----------|--------------|-----------|----------|----------|---------------|------|----|
| ENSMUSG00000095186 | 8,06E-01  | -2,051785765 | 1,38E+00  | 2,41E-01 | 5,50E-01 | Gm10718       | 1,75 | No |
| ENSMUSG00000095187 | 2,64E+00  | -3,033673223 | 2,69E+00  | 1,01E-01 | 3,92E-01 | Olfr1381      | 6,23 | No |
| ENSMUSG00000095193 | 5,68E-01  | 0,111908641  | 4,39E+00  | 3,62E-02 | 2,26E-01 | Gm20939       | 1,48 | No |
| ENSMUSG00000095197 | 8,58E-01  | -2,401388602 | 8,86E-01  | 3,47E-01 | 6,47E-01 | Ighv1-59      | 1,81 | No |
| ENSMUSG00000095199 | 1,06E-01  | 1,047023016  | 2,66E-01  | 6,06E-01 | 8,50E-01 | Zfp967        | 1,08 | No |
| ENSMUSG00000095202 | 3,14E-02  | -3,107617333 | -7,69E-10 | 1,00E+00 | 1,00E+00 | Gm6100        | 1,02 | No |
| ENSMUSG00000095203 | -6,90E-02 | -0,839786181 | 2,78E-02  | 8,68E-01 | 1,00E+00 | Gm13810       | 0,95 | No |
| ENSMUSG00000095204 | -1,87E+00 | -3,107637761 | 1,39E+00  | 2,38E-01 | 5,50E-01 | Ighv1-52      | 0,27 | No |
| ENSMUSG00000095205 | -6,55E-01 | -1,024508903 | 2,02E+00  | 1,55E-01 | 4,99E-01 | Snord93       | 0,63 | No |
| ENSMUSG00000095217 | -1,38E-01 | 0,693395791  | 3,56E-01  | 5,51E-01 | 8,17E-01 | Hist1h2bn     | 0,91 | No |
| ENSMUSG00000095218 | -1,89E+00 | -3,1076441   | 1,42E+00  | 2,33E-01 | 5,50E-01 | Olfr1338      | 0,27 | No |
| ENSMUSG00000095224 | 1,18E+00  | -3,107654884 | 6,57E-01  | 4,17E-01 | 7,12E-01 | F930015N05Rik | 2,27 | No |
| ENSMUSG00000095233 | -2,71E+00 | -3,033620915 | 2,92E+00  | 8,75E-02 | 3,78E-01 | Gm26378       | 0,15 | No |
| ENSMUSG00000095234 | 1,81E+00  | -3,10765737  | 1,28E+00  | 2,58E-01 | 5,50E-01 | Gm21586       | 3,49 | No |
| ENSMUSG00000095241 | 1,87E+00  | -3,107639691 | 1,38E+00  | 2,40E-01 | 5,50E-01 | Gm5478        | 3,67 | No |
| ENSMUSG00000095245 | -1,32E+00 | -2,770524975 | 1,09E+00  | 2,96E-01 | 5,92E-01 | Gm24753       | 0,40 | No |
| ENSMUSG00000095249 | -1,89E+00 | -3,1076441   | 1,42E+00  | 2,33E-01 | 5,50E-01 | n-R5s103      | 0,27 | No |
| ENSMUSG00000095253 | 2,27E-01  | 2,448310708  | 3,13E+00  | 7,71E-02 | 3,54E-01 | Zfp799        | 1,17 | No |
| ENSMUSG00000095258 | 1,87E+00  | -3,107639691 | 1,38E+00  | 2,40E-01 | 5,50E-01 | Gm10593       | 3,67 | No |
| ENSMUSG00000095272 | 3,15E+00  | -2,83203373  | 4,04E+00  | 4,44E-02 | 2,51E-01 | Gm24242       | 8,86 | No |
| ENSMUSG00000095276 | -2,71E+00 | -2,963235336 | 2,92E+00  | 8,75E-02 | 3,78E-01 | Gfy           | 0,15 | No |
| ENSMUSG00000095278 | -5,48E-01 | -2,832014829 | 2,34E-01  | 6,28E-01 | 8,61E-01 | Gm27634       | 0,68 | No |
| ENSMUSG00000095280 | -1,42E-02 | -2,831988549 | 1,11E-04  | 9,92E-01 | 1,00E+00 | Gm21738       | 0,99 | No |
| ENSMUSG00000095288 | -6,70E-02 | -2,548207315 | 4,08E-03  | 9,49E-01 | 1,00E+00 | Gm7618        | 0,95 | No |
| ENSMUSG00000095294 | 8,38E-01  | -2,711732106 | 6,13E-01  | 4,34E-01 | 7,27E-01 | Gm21119       | 1,79 | No |
| ENSMUSG00000095295 | 2,61E+00  | -3,033672762 | 2,63E+00  | 1,05E-01 | 3,97E-01 | Gm3488        | 6,10 | No |
| ENSMUSG00000095311 | -3,55E+00 | -2,77053571  | 5,67E+00  | 1,72E-02 | 1,37E-01 | Gm25464       | 0,09 | No |
| ENSMUSG00000095315 | -1,34E-01 | -0,847676789 | 1,15E-01  | 7,34E-01 | 9,24E-01 | Gm10130       | 0,91 | No |
| ENSMUSG00000095325 | 1,38E-01  | 1,941224588  | 8,66E-01  | 3,52E-01 | 6,53E-01 | Zfp870        | 1,10 | No |
| ENSMUSG00000095332 | 2,38E-01  | 3,618722451  | 5,98E+00  | 1,45E-02 | 1,23E-01 | Gm9821        | 1,18 | No |
| ENSMUSG00000095334 | -5,54E-01 | -0,278575068 | 2,90E+00  | 8,85E-02 | 3,79E-01 | Gm21984       | 0,68 | No |
| ENSMUSG00000095347 | -1,94E+00 | -3,107619243 | 1,50E+00  | 2,21E-01 | 5,50E-01 | Gm26095       | 0,26 | No |

|                    |           |              |           |          |          |               |      |     |
|--------------------|-----------|--------------|-----------|----------|----------|---------------|------|-----|
| ENSMUSG00000095348 | 3,14E-02  | -3,107617333 | -7,69E-10 | 1,00E+00 | 1,00E+00 | Gm3892        | 1,02 | No  |
| ENSMUSG00000095350 | -1,59E+00 | -2,800901725 | 1,67E+00  | 1,96E-01 | 5,50E-01 | Gm23284       | 0,33 | No  |
| ENSMUSG00000095351 | -1,87E+00 | -3,107637761 | 1,39E+00  | 2,38E-01 | 5,50E-01 | Igkv3-2       | 0,27 | No  |
| ENSMUSG00000095361 | 7,28E-01  | -2,831991672 | 2,89E-01  | 5,91E-01 | 8,41E-01 | Gm24967       | 1,66 | No  |
| ENSMUSG00000095362 | 1,95E-02  | 2,459341997  | 2,29E-02  | 8,80E-01 | 1,00E+00 | Gm14325       | 1,01 | No  |
| ENSMUSG00000095369 | -4,38E-01 | -2,548181477 | 1,96E-01  | 6,58E-01 | 8,81E-01 | Gm21859       | 0,74 | No  |
| ENSMUSG00000095370 | 1,85E+00  | -3,107657832 | 1,35E+00  | 2,46E-01 | 5,50E-01 | Trav6n-7      | 3,61 | No  |
| ENSMUSG00000095376 | -2,44E+00 | -2,62756499  | 5,03E+00  | 2,49E-02 | 1,74E-01 | Gm22109       | 0,18 | No  |
| ENSMUSG00000095379 | -9,66E-02 | -1,510110508 | 3,65E-02  | 8,49E-01 | 9,88E-01 | Gm22108       | 0,94 | No  |
| ENSMUSG00000095385 | 2,64E+00  | -2,963257704 | 2,69E+00  | 1,01E-01 | 3,92E-01 | D630033O11Rik | 6,23 | No  |
| ENSMUSG00000095396 | -3,46E-01 | -2,401422551 | 1,51E-01  | 6,98E-01 | 9,03E-01 | Gm25618       | 0,79 | No  |
| ENSMUSG00000095403 | -4,90E-02 | 3,029006808  | 1,86E-01  | 6,66E-01 | 8,86E-01 | Gm21092       | 0,97 | No  |
| ENSMUSG00000095407 | 9,01E-03  | -3,107646452 | -5,16E-10 | 1,00E+00 | 1,00E+00 | Tmem200c      | 1,01 | No  |
| ENSMUSG00000095410 | -8,53E-01 | -2,800954486 | 3,99E-01  | 5,28E-01 | 8,04E-01 | n-R5s121      | 0,55 | No  |
| ENSMUSG00000095414 | 3,13E+00  | -2,963281267 | 4,01E+00  | 4,53E-02 | 2,54E-01 | Gm23923       | 8,78 | No  |
| ENSMUSG00000095419 | -1,73E-01 | 7,698011333  | 8,72E+00  | 3,15E-03 | 3,98E-02 | Gm14328       | 0,89 | Yes |
| ENSMUSG00000095427 | -3,77E-02 | 6,117094922  | 3,39E-01  | 5,60E-01 | 8,23E-01 | Rps2-ps6      | 0,97 | No  |
| ENSMUSG00000095432 | 2,94E-02  | 2,893126117  | 6,33E-02  | 8,01E-01 | 9,61E-01 | Zfp748        | 1,02 | No  |
| ENSMUSG00000095438 | -1,34E-01 | -1,816421268 | 4,73E-02  | 8,28E-01 | 9,76E-01 | Mir133a-1hg   | 0,91 | No  |
| ENSMUSG00000095440 | 3,10E-01  | 1,225233643  | 2,66E+00  | 1,03E-01 | 3,95E-01 | Figl2         | 1,24 | No  |
| ENSMUSG00000095442 | 3,14E-02  | -3,107617333 | -7,69E-10 | 1,00E+00 | 1,00E+00 | Ighv1-4       | 1,02 | No  |
| ENSMUSG00000095453 | -1,33E+00 | -2,832016587 | 1,10E+00  | 2,94E-01 | 5,89E-01 | n-R5s149      | 0,40 | No  |
| ENSMUSG00000095457 | -2,06E-01 | 2,284798353  | 2,25E+00  | 1,34E-01 | 4,60E-01 | Gm8989        | 0,87 | No  |
| ENSMUSG00000095460 | 2,67E+00  | -3,033636951 | 2,76E+00  | 9,68E-02 | 3,88E-01 | Vmn2r-ps16    | 6,36 | No  |
| ENSMUSG00000095463 | -2,66E-02 | 3,941963317  | 8,74E-02  | 7,68E-01 | 9,41E-01 | Entpd4        | 0,98 | No  |
| ENSMUSG00000095464 | -3,41E-01 | 4,148924033  | 1,58E+01  | 7,09E-05 | 1,82E-03 | Gm21987       | 0,79 | Yes |
| ENSMUSG00000095472 | 1,20E-02  | -0,907162922 | 7,23E-04  | 9,79E-01 | 1,00E+00 | Snord88a      | 1,01 | No  |
| ENSMUSG00000095477 | 3,14E-02  | -3,107617333 | -7,69E-10 | 1,00E+00 | 1,00E+00 | Gm25076       | 1,02 | No  |
| ENSMUSG00000095478 | 2,02E-02  | 5,042717441  | 7,45E-02  | 7,85E-01 | 9,51E-01 | Gm9824        | 1,01 | No  |
| ENSMUSG00000095489 | -5,24E-02 | -2,963245194 | 1,25E-03  | 9,72E-01 | 1,00E+00 | Gm25737       | 0,96 | No  |
| ENSMUSG00000095493 | -1,89E+00 | -3,1076441   | 1,42E+00  | 2,33E-01 | 5,50E-01 | A630023A22Rik | 0,27 | No  |
| ENSMUSG00000095503 | 1,85E+00  | -3,107657832 | 1,35E+00  | 2,46E-01 | 5,50E-01 | Gm3147        | 3,61 | No  |

|                    |           |              |           |          |          |               |      |     |
|--------------------|-----------|--------------|-----------|----------|----------|---------------|------|-----|
| ENSMUSG00000095504 | 1,91E+00  | -2,770645425 | 2,73E+00  | 9,85E-02 | 3,91E-01 | Gm22446       | 3,77 | No  |
| ENSMUSG00000095512 | 2,03E-02  | 4,19624547   | 5,65E-02  | 8,12E-01 | 9,67E-01 | Gm17222       | 1,01 | No  |
| ENSMUSG00000095514 | -8,10E-01 | -2,963247942 | 3,56E-01  | 5,51E-01 | 8,17E-01 | D13Ertd608e   | 0,57 | No  |
| ENSMUSG00000095524 | -3,89E-01 | 3,413862031  | 1,47E+01  | 1,24E-04 | 2,91E-03 | Gm15682       | 0,76 | Yes |
| ENSMUSG00000095526 | -2,76E-01 | 5,958460457  | 1,76E+01  | 2,71E-05 | 8,03E-04 | Gm10243       | 0,83 | Yes |
| ENSMUSG00000095530 | -6,05E-01 | -1,785652894 | 8,63E-01  | 3,53E-01 | 6,54E-01 | Snora19       | 0,66 | No  |
| ENSMUSG00000095538 | 5,86E-02  | 4,077337436  | 4,52E-01  | 5,01E-01 | 7,86E-01 | Gm21983       | 1,04 | No  |
| ENSMUSG00000095541 | -3,19E+00 | -2,963221167 | 4,28E+00  | 3,87E-02 | 2,33E-01 | Gm24617       | 0,11 | No  |
| ENSMUSG00000095545 | 6,68E-03  | 0,796726722  | 9,51E-04  | 9,75E-01 | 1,00E+00 | Zfp969        | 1,00 | No  |
| ENSMUSG00000095547 | -2,41E-01 | -2,247046486 | 1,00E-01  | 7,51E-01 | 9,32E-01 | Gm10719       | 0,85 | No  |
| ENSMUSG00000095565 | -3,83E-02 | -3,107651936 | -7,91E-11 | 1,00E+00 | 1,00E+00 | Ighv2-9-1     | 0,97 | No  |
| ENSMUSG00000095567 | 1,57E-01  | 6,172884357  | 5,89E+00  | 1,52E-02 | 1,27E-01 | Noc2l         | 1,11 | No  |
| ENSMUSG00000095571 | 1,21E-02  | -3,033650469 | 7,34E-11  | 1,00E+00 | 1,00E+00 | Ighv5-17      | 1,01 | No  |
| ENSMUSG00000095584 | -1,87E+00 | -2,963234282 | 1,41E+00  | 2,35E-01 | 5,50E-01 | Gm22628       | 0,27 | No  |
| ENSMUSG00000095588 | -6,83E-02 | 6,331374252  | 1,15E+00  | 2,83E-01 | 5,79E-01 | Gm12350       | 0,95 | No  |
| ENSMUSG00000095589 | -1,98E-02 | -3,033655952 | 2,83E-11  | 1,00E+00 | 1,00E+00 | Ighv1-55      | 0,99 | No  |
| ENSMUSG00000095590 | 1,82E+00  | -3,033667329 | 1,31E+00  | 2,52E-01 | 5,50E-01 | Gm24305       | 3,54 | No  |
| ENSMUSG00000095595 | -3,74E-01 | 5,87830867   | 3,23E+01  | 1,29E-08 | 8,79E-07 | Fam177a       | 0,77 | Yes |
| ENSMUSG00000095596 | 2,64E+00  | -3,033673223 | 2,69E+00  | 1,01E-01 | 3,92E-01 | Gm24303       | 6,23 | No  |
| ENSMUSG00000095600 | -1,26E-01 | 3,570207761  | 1,66E+00  | 1,97E-01 | 5,50E-01 | Gm9457        | 0,92 | No  |
| ENSMUSG00000095603 | -8,85E-01 | -2,268061218 | 1,41E+00  | 2,36E-01 | 5,50E-01 | Olfr106-ps    | 0,54 | No  |
| ENSMUSG00000095609 | 5,75E-02  | 5,8803521    | 7,56E-01  | 3,85E-01 | 6,86E-01 | Gm21188       | 1,04 | No  |
| ENSMUSG00000095615 | 2,41E-01  | -2,448611615 | 7,32E-02  | 7,87E-01 | 9,53E-01 | Gm26243       | 1,18 | No  |
| ENSMUSG00000095616 | -2,04E+00 | -2,448611075 | 3,16E+00  | 7,53E-02 | 3,49E-01 | Gm26244       | 0,24 | No  |
| ENSMUSG00000095620 | -3,00E-01 | 4,827224714  | 1,54E+01  | 8,72E-05 | 2,17E-03 | 2010005H15Rik | 0,81 | Yes |
| ENSMUSG00000095630 | -3,82E+00 | -2,831993311 | 6,97E+00  | 8,28E-03 | 8,12E-02 | Igkv6-23      | 0,07 | No  |
| ENSMUSG00000095635 | 1,86E+00  | -2,963277112 | 1,35E+00  | 2,46E-01 | 5,50E-01 | Gm22951       | 3,62 | No  |
| ENSMUSG00000095642 | -1,89E+00 | -3,1076441   | 1,42E+00  | 2,33E-01 | 5,50E-01 | Ighv14-3      | 0,27 | No  |
| ENSMUSG00000095643 | 1,20E+00  | -3,146123991 | 6,74E-01  | 4,12E-01 | 7,07E-01 | Trav13d-3     | 2,30 | No  |
| ENSMUSG00000095645 | 2,93E+00  | -2,998020798 | 3,40E+00  | 6,53E-02 | 3,20E-01 | n-R5s143      | 7,61 | No  |
| ENSMUSG00000095648 | 8,69E-02  | 0,30244952   | 1,14E-01  | 7,35E-01 | 9,24E-01 | Gm2004        | 1,06 | No  |
| ENSMUSG00000095649 | -1,69E-01 | 3,666303144  | 3,23E+00  | 7,24E-02 | 3,41E-01 | Gm8979        | 0,89 | No  |

|                    |           |              |           |          |          |            |  |      |     |
|--------------------|-----------|--------------|-----------|----------|----------|------------|--|------|-----|
| ENSMUSG00000095651 | 4,58E-01  | -0,816197592 | 1,35E+00  | 2,46E-01 | 5,50E-01 | Gm21817    |  | 1,37 | No  |
| ENSMUSG00000095652 | -5,91E-01 | -2,711680978 | 2,74E-01  | 6,01E-01 | 8,47E-01 | n-R5s123   |  | 0,66 | No  |
| ENSMUSG00000095661 | -8,37E-02 | 2,496366381  | 4,07E-01  | 5,23E-01 | 8,01E-01 | Gm8935     |  | 0,94 | No  |
| ENSMUSG00000095663 | -6,70E-02 | -1,800930717 | 1,15E-02  | 9,14E-01 | 1,00E+00 | Gm2310     |  | 0,95 | No  |
| ENSMUSG00000095676 | 3,48E-01  | -2,71170995  | 1,24E-01  | 7,24E-01 | 9,18E-01 | Gm25099    |  | 1,27 | No  |
| ENSMUSG00000095677 | 1,61E-01  | 3,139443197  | 2,19E+00  | 1,39E-01 | 4,70E-01 | Dynlt1f    |  | 1,12 | No  |
| ENSMUSG00000095678 | -1,92E+00 | -3,033623267 | 1,46E+00  | 2,27E-01 | 5,50E-01 | Gm25101    |  | 0,26 | No  |
| ENSMUSG00000095686 | -1,89E+00 | -3,1076441   | 1,42E+00  | 2,33E-01 | 5,50E-01 | Gm3099     |  | 0,27 | No  |
| ENSMUSG00000095687 | -5,74E-01 | 6,165836671  | 7,94E+01  | 4,96E-19 | 1,05E-16 | Rnaset2a   |  | 0,67 | Yes |
| ENSMUSG00000095690 | -3,80E-02 | 5,536251331  | 3,04E-01  | 5,81E-01 | 8,37E-01 | Rab11b-ps2 |  | 0,97 | No  |
| ENSMUSG00000095700 | 1,85E+00  | -3,107657832 | 1,35E+00  | 2,46E-01 | 5,50E-01 | lghv10-3   |  | 3,61 | No  |
| ENSMUSG00000095704 | -1,83E+00 | -0,299737382 | 3,23E+01  | 1,35E-08 | 9,05E-07 | Gm8221     |  | 0,28 | Yes |
| ENSMUSG00000095710 | 1,87E+00  | -3,107639691 | 1,38E+00  | 2,40E-01 | 5,50E-01 | Gm8871     |  | 3,67 | No  |
| ENSMUSG00000095720 | -9,79E-01 | -2,770566494 | 8,44E-01  | 3,58E-01 | 6,60E-01 | Gm1604b    |  | 0,51 | No  |
| ENSMUSG00000095723 | 9,01E-03  | -3,107646452 | -5,16E-10 | 1,00E+00 | 1,00E+00 | Gm23647    |  | 1,01 | No  |
| ENSMUSG00000095730 | -4,05E-01 | -1,526962544 | 4,82E-01  | 4,88E-01 | 7,75E-01 | Vmn2r29    |  | 0,76 | No  |
| ENSMUSG00000095731 | -1,87E+00 | -3,107637761 | 1,39E+00  | 2,38E-01 | 5,50E-01 | Gm25312    |  | 0,27 | No  |
| ENSMUSG00000095738 | -1,89E+00 | -3,1076441   | 1,42E+00  | 2,33E-01 | 5,50E-01 | Gm25313    |  | 0,27 | No  |
| ENSMUSG00000095740 | -7,61E-02 | -2,963237265 | 2,63E-03  | 9,59E-01 | 1,00E+00 | Gm22474    |  | 0,95 | No  |
| ENSMUSG00000095747 | -5,35E-01 | -2,77061934  | 2,23E-01  | 6,37E-01 | 8,68E-01 | Gm22475    |  | 0,69 | No  |
| ENSMUSG00000095749 | -1,10E+00 | -2,740863598 | 1,11E+00  | 2,92E-01 | 5,87E-01 | n-R5s141   |  | 0,47 | No  |
| ENSMUSG00000095752 | -7,52E-01 | -2,448620705 | 6,34E-01  | 4,26E-01 | 7,20E-01 | Gm24182    |  | 0,59 | No  |
| ENSMUSG00000095762 | -2,71E-01 | 4,477768115  | 1,12E+01  | 8,10E-04 | 1,36E-02 | Gm16378    |  | 0,83 | Yes |
| ENSMUSG00000095766 | 1,39E-01  | -0,278846386 | 1,88E-01  | 6,64E-01 | 8,84E-01 | Gm21182    |  | 1,10 | No  |
| ENSMUSG00000095771 | -1,98E+00 | -1,522499811 | 1,01E+01  | 1,45E-03 | 2,18E-02 | Igkv14-111 |  | 0,25 | Yes |
| ENSMUSG00000095772 | 2,75E-01  | -2,896159108 | 4,63E-02  | 8,30E-01 | 9,77E-01 | Gm23017    |  | 1,21 | No  |
| ENSMUSG00000095773 | 2,67E+00  | -3,033636951 | 2,76E+00  | 9,68E-02 | 3,88E-01 | Vmn2r38    |  | 6,36 | No  |
| ENSMUSG00000095788 | 3,26E-01  | 3,873096869  | 1,22E+01  | 4,80E-04 | 8,88E-03 | Sirpb1a    |  | 1,25 | Yes |
| ENSMUSG00000095789 | 6,66E-01  | -1,627812875 | 1,30E+00  | 2,54E-01 | 5,50E-01 | Nupr1l     |  | 1,59 | No  |
| ENSMUSG00000095791 | -1,37E+00 | -2,770619404 | 1,17E+00  | 2,79E-01 | 5,76E-01 | Gm26295    |  | 0,39 | No  |
| ENSMUSG00000095797 | -5,25E-02 | -3,033661434 | 4,08E-11  | 1,00E+00 | 1,00E+00 | Gm8246     |  | 0,96 | No  |
| ENSMUSG00000095799 | -1,47E+00 | -2,655125771 | 2,24E+00  | 1,34E-01 | 4,61E-01 | Gm8332     |  | 0,36 | No  |

|                    |           |              |           |          |          |            |      |     |
|--------------------|-----------|--------------|-----------|----------|----------|------------|------|-----|
| ENSMUSG00000095805 | -3,88E+00 | -2,711654015 | 7,22E+00  | 7,21E-03 | 7,35E-02 | Gm22092    | 0,07 | No  |
| ENSMUSG00000095812 | -2,54E-01 | -0,832148378 | 3,70E-01  | 5,43E-01 | 8,12E-01 | Gm5473     | 0,84 | No  |
| ENSMUSG00000095824 | 4,89E-02  | 1,537514297  | 7,56E-02  | 7,83E-01 | 9,50E-01 | Gm13697    | 1,03 | No  |
| ENSMUSG00000095825 | 3,14E-02  | -3,107617333 | -7,69E-10 | 1,00E+00 | 1,00E+00 | Gm25448    | 1,02 | No  |
| ENSMUSG00000095834 | -6,10E-01 | -0,593953033 | 3,02E+00  | 8,23E-02 | 3,69E-01 | Tdgf1-ps1  | 0,66 | No  |
| ENSMUSG00000095836 | -4,82E-02 | -2,18569495  | 3,77E-03  | 9,51E-01 | 1,00E+00 | Gm21960    | 0,97 | No  |
| ENSMUSG00000095841 | 7,88E-02  | 2,161494759  | 3,06E-01  | 5,80E-01 | 8,37E-01 | Gm8532     | 1,06 | No  |
| ENSMUSG00000095842 | 3,14E-02  | -3,107617333 | -7,69E-10 | 1,00E+00 | 1,00E+00 | Gm24302    | 1,02 | No  |
| ENSMUSG00000095845 | -3,60E-01 | -2,18561505  | 1,63E-01  | 6,86E-01 | 8,97E-01 | Gm5741     | 0,78 | No  |
| ENSMUSG00000095847 | -3,63E-01 | 5,461994477  | 2,73E+01  | 1,76E-07 | 9,31E-06 | Gm5451     | 0,78 | Yes |
| ENSMUSG00000095853 | 2,62E+00  | -2,963288024 | 2,65E+00  | 1,03E-01 | 3,95E-01 | Gm22616    | 6,14 | No  |
| ENSMUSG00000095857 | -1,87E+00 | -3,033619006 | 1,41E+00  | 2,36E-01 | 5,50E-01 | Gm22618    | 0,27 | No  |
| ENSMUSG00000095858 | 3,64E-01  | -1,378394952 | 5,37E-01  | 4,64E-01 | 7,52E-01 | Olfr104-ps | 1,29 | No  |
| ENSMUSG00000095865 | 1,25E-01  | 4,08182983   | 2,00E+00  | 1,57E-01 | 5,02E-01 | Gm13237    | 1,09 | No  |
| ENSMUSG00000095868 | 7,81E-03  | 0,511725661  | 1,04E-03  | 9,74E-01 | 1,00E+00 | Gm23136    | 1,01 | No  |
| ENSMUSG00000095869 | 1,21E-01  | 0,514741933  | 2,32E-01  | 6,30E-01 | 8,62E-01 | Ppp1r2-ps6 | 1,09 | No  |
| ENSMUSG00000095871 | -1,71E+00 | -2,574172501 | 2,04E+00  | 1,53E-01 | 4,96E-01 | Gm25931    | 0,31 | No  |
| ENSMUSG00000095878 | 3,14E-02  | -3,107617333 | -7,69E-10 | 1,00E+00 | 1,00E+00 | Gm23045    | 1,02 | No  |
| ENSMUSG00000095889 | 4,42E-01  | -2,655093787 | 1,53E-01  | 6,96E-01 | 9,03E-01 | Ighv1-58   | 1,36 | No  |
| ENSMUSG00000095891 | 6,01E-01  | -2,226329346 | 6,12E-01  | 4,34E-01 | 7,27E-01 | Gm10717    | 1,52 | No  |
| ENSMUSG00000095892 | 1,24E+00  | -2,711745863 | 9,53E-01  | 3,29E-01 | 6,30E-01 | Rnu5g      | 2,36 | No  |
| ENSMUSG00000095894 | 1,81E+00  | -3,10765737  | 1,28E+00  | 2,58E-01 | 5,50E-01 | Gm24795    | 3,49 | No  |
| ENSMUSG00000095895 | 1,89E+00  | -2,896080212 | 1,37E+00  | 2,41E-01 | 5,50E-01 | Gm21963    | 3,70 | No  |
| ENSMUSG00000095905 | -2,66E-01 | -0,278691894 | 7,05E-01  | 4,01E-01 | 6,99E-01 | Gm19961    | 0,83 | No  |
| ENSMUSG00000095912 | -1,87E+00 | -3,107637761 | 1,39E+00  | 2,38E-01 | 5,50E-01 | Gm3317     | 0,27 | No  |
| ENSMUSG00000095913 | 7,51E-02  | 1,886358844  | 2,36E-01  | 6,27E-01 | 8,61E-01 | Gm21844    | 1,05 | No  |
| ENSMUSG00000095918 | 3,14E-02  | -3,107617333 | -7,69E-10 | 1,00E+00 | 1,00E+00 | Gm5861     | 1,02 | No  |
| ENSMUSG00000095920 | 9,01E-03  | -3,107646452 | -5,16E-10 | 1,00E+00 | 1,00E+00 | Gm6686     | 1,01 | No  |
| ENSMUSG00000095930 | 3,95E-01  | 2,994852659  | 1,18E+01  | 5,81E-04 | 1,04E-02 | Nim1k      | 1,32 | Yes |
| ENSMUSG00000095937 | 5,07E-02  | 7,641373723  | 7,41E-01  | 3,89E-01 | 6,90E-01 | Gm12671    | 1,04 | No  |
| ENSMUSG00000095940 | -1,90E+00 | -3,033647263 | 1,44E+00  | 2,30E-01 | 5,50E-01 | Gm16416    | 0,27 | No  |
| ENSMUSG00000095943 | 3,15E+00  | -2,770609903 | 4,04E+00  | 4,44E-02 | 2,51E-01 | Gm25197    | 8,87 | No  |

|                    |           |              |           |          |          |               |      |     |
|--------------------|-----------|--------------|-----------|----------|----------|---------------|------|-----|
| ENSMUSG00000095944 | -3,19E+00 | -2,831909156 | 4,29E+00  | 3,82E-02 | 2,32E-01 | n-R5s210      | 0,11 | No  |
| ENSMUSG00000095947 | -1,94E+00 | -3,107619243 | 1,50E+00  | 2,21E-01 | 5,50E-01 | Gm25195       | 0,26 | No  |
| ENSMUSG00000095953 | -1,23E+00 | -3,146117124 | 7,12E-01  | 3,99E-01 | 6,98E-01 | 6030469F06Rik | 0,42 | No  |
| ENSMUSG00000095955 | -3,06E-02 | -2,831988087 | 5,94E-04  | 9,81E-01 | 1,00E+00 | Gm22360       | 0,98 | No  |
| ENSMUSG00000095960 | -5,62E-01 | -0,155671563 | 3,03E+00  | 8,16E-02 | 3,67E-01 | Gm13120       | 0,68 | No  |
| ENSMUSG00000095966 | -1,25E+00 | -2,627605237 | 1,50E+00  | 2,21E-01 | 5,50E-01 | n-R5s105      | 0,42 | No  |
| ENSMUSG00000095969 | 8,68E-01  | -2,311183822 | 9,07E-01  | 3,41E-01 | 6,42E-01 | Rnu1a1        | 1,83 | No  |
| ENSMUSG00000095972 | 1,57E+00  | -2,401470774 | 2,69E+00  | 1,01E-01 | 3,92E-01 | Gm23512       | 2,97 | No  |
| ENSMUSG00000095977 | -5,88E-02 | -3,033652696 | 1,62E-03  | 9,68E-01 | 1,00E+00 | Gm23513       | 0,96 | No  |
| ENSMUSG00000095986 | -8,34E-01 | -2,963223097 | 3,81E-01  | 5,37E-01 | 8,09E-01 | Gm23053       | 0,56 | No  |
| ENSMUSG00000095987 | -7,74E-03 | 0,280863425  | 8,16E-04  | 9,77E-01 | 1,00E+00 | Gm13104       | 0,99 | No  |
| ENSMUSG00000095990 | -1,82E-01 | 2,397778862  | 1,83E+00  | 1,76E-01 | 5,35E-01 | Zfp97         | 0,88 | No  |
| ENSMUSG00000095991 | -4,22E-02 | 4,245733027  | 2,46E-01  | 6,20E-01 | 8,57E-01 | Gm17048       | 0,97 | No  |
| ENSMUSG00000095993 | 1,81E+00  | -3,10765737  | 1,28E+00  | 2,58E-01 | 5,50E-01 | Gm21060       | 3,49 | No  |
| ENSMUSG00000096001 | -7,31E-01 | 1,706110497  | 1,98E+01  | 8,38E-06 | 2,87E-04 | 2610528A11Rik | 0,60 | Yes |
| ENSMUSG00000096003 | -2,73E+00 | -2,963241672 | 2,94E+00  | 8,62E-02 | 3,78E-01 | Gm3500        | 0,15 | No  |
| ENSMUSG00000096005 | 9,01E-03  | -3,107646452 | -5,16E-10 | 1,00E+00 | 1,00E+00 | Gm24863       | 1,01 | No  |
| ENSMUSG00000096006 | 9,50E-04  | 5,15607316   | 1,73E-04  | 9,90E-01 | 1,00E+00 | Gm21596       | 1,00 | No  |
| ENSMUSG00000096010 | 2,53E-01  | -1,378290252 | 2,83E-01  | 5,95E-01 | 8,44E-01 | Hist4h4       | 1,19 | No  |
| ENSMUSG00000096015 | -5,85E-01 | -2,683166041 | 2,68E-01  | 6,04E-01 | 8,49E-01 | n-R5s134      | 0,67 | No  |
| ENSMUSG00000096022 | 1,81E+00  | -2,963282131 | 1,30E+00  | 2,54E-01 | 5,50E-01 | Gm23421       | 3,50 | No  |
| ENSMUSG00000096030 | 2,61E+00  | -3,033672762 | 2,63E+00  | 1,05E-01 | 3,97E-01 | Gm24424       | 6,10 | No  |
| ENSMUSG00000096035 | 4,81E-01  | -1,896092159 | 4,49E-01  | 5,03E-01 | 7,88E-01 | Gm1045        | 1,40 | No  |
| ENSMUSG00000096038 | -2,49E-02 | -3,146121042 | -4,44E-11 | 1,00E+00 | 1,00E+00 | Trav13n-3     | 0,98 | No  |
| ENSMUSG00000096043 | 3,14E-02  | -3,107617333 | -7,69E-10 | 1,00E+00 | 1,00E+00 | Gm24968       | 1,02 | No  |
| ENSMUSG00000096049 | 1,81E+00  | -3,10765737  | 1,28E+00  | 2,58E-01 | 5,50E-01 | Gm2075        | 3,49 | No  |
| ENSMUSG00000096052 | -5,29E-01 | -1,509995816 | 8,40E-01  | 3,59E-01 | 6,61E-01 | 9930004E17Rik | 0,69 | No  |
| ENSMUSG00000096054 | 1,18E-02  | 5,962754765  | 3,21E-02  | 8,58E-01 | 9,94E-01 | Syne1         | 1,01 | No  |
| ENSMUSG00000096061 | 2,57E+00  | -3,0336723   | 2,56E+00  | 1,10E-01 | 4,06E-01 | Gm23681       | 5,96 | No  |
| ENSMUSG00000096086 | -9,25E-01 | -2,548165478 | 7,50E-01  | 3,86E-01 | 6,87E-01 | Gm4761        | 0,53 | No  |
| ENSMUSG00000096094 | 1,89E+00  | -2,655188716 | 2,65E+00  | 1,03E-01 | 3,95E-01 | A630095N17Rik | 3,70 | No  |
| ENSMUSG00000096096 | -8,61E-01 | -2,89612532  | 4,07E-01  | 5,24E-01 | 8,01E-01 | Trav4-4-dv10  | 0,55 | No  |



|                    |           |              |           |          |          |               |      |     |
|--------------------|-----------|--------------|-----------|----------|----------|---------------|------|-----|
| ENSMUSG00000096102 | -1,27E+00 | -3,146104694 | 7,49E-01  | 3,87E-01 | 6,87E-01 | Gm9167        | 0,42 | No  |
| ENSMUSG00000096106 | -1,23E+00 | -3,146117124 | 7,12E-01  | 3,99E-01 | 6,98E-01 | Trav5d-4      | 0,42 | No  |
| ENSMUSG00000096107 | -3,83E-02 | -3,107651936 | -7,91E-11 | 1,00E+00 | 1,00E+00 | Gm16505       | 0,97 | No  |
| ENSMUSG00000096108 | -1,94E+00 | -3,107619243 | 1,50E+00  | 2,21E-01 | 5,50E-01 | lghv11-2      | 0,26 | No  |
| ENSMUSG00000096111 | -2,64E+00 | -2,963219259 | 2,78E+00  | 9,55E-02 | 3,86E-01 | Gm21917       | 0,16 | No  |
| ENSMUSG00000096112 | -1,94E+00 | -3,107619243 | 1,50E+00  | 2,21E-01 | 5,50E-01 | Gm26269       | 0,26 | No  |
| ENSMUSG00000096126 | 1,87E+00  | -3,107639691 | 1,38E+00  | 2,40E-01 | 5,50E-01 | Gm22307       | 3,67 | No  |
| ENSMUSG00000096140 | 1,51E-02  | 1,809626163  | 8,63E-03  | 9,26E-01 | 1,00E+00 | Ankrd66       | 1,01 | No  |
| ENSMUSG00000096141 | -5,40E-01 | -2,770618485 | 2,28E-01  | 6,33E-01 | 8,65E-01 | Dnah7a        | 0,69 | No  |
| ENSMUSG00000096144 | 9,01E-03  | -3,107646452 | -5,16E-10 | 1,00E+00 | 1,00E+00 | B020004C17Rik | 1,01 | No  |
| ENSMUSG00000096145 | 1,01E-01  | 3,26386898   | 9,23E-01  | 3,37E-01 | 6,37E-01 | Vkorc1        | 1,07 | No  |
| ENSMUSG00000096147 | 1,20E+00  | -2,998010919 | 6,68E-01  | 4,14E-01 | 7,09E-01 | Gm25818       | 2,29 | No  |
| ENSMUSG00000096156 | 7,35E-02  | 4,744632682  | 9,07E-01  | 3,41E-01 | 6,42E-01 | Gm9242        | 1,05 | No  |
| ENSMUSG00000096157 | 1,02E-01  | 4,335921216  | 1,53E+00  | 2,17E-01 | 5,50E-01 | Gm5472        | 1,07 | No  |
| ENSMUSG00000096158 | -4,56E-01 | -1,997995522 | 3,83E-01  | 5,36E-01 | 8,08E-01 | Gm21827       | 0,73 | No  |
| ENSMUSG00000096160 | -3,12E-02 | 4,644989486  | 1,57E-01  | 6,92E-01 | 9,00E-01 | Gm3436        | 0,98 | No  |
| ENSMUSG00000096168 | 1,26E+00  | -2,896169772 | 9,87E-01  | 3,21E-01 | 6,21E-01 | Trav5n-4      | 2,39 | No  |
| ENSMUSG00000096169 | -1,67E-02 | -2,963250293 | 1,29E-04  | 9,91E-01 | 1,00E+00 | Olfr1564      | 0,99 | No  |
| ENSMUSG00000096170 | -1,35E+00 | -2,800934852 | 1,14E+00  | 2,85E-01 | 5,81E-01 | n-R5s146      | 0,39 | No  |
| ENSMUSG00000096171 | -6,29E-02 | -2,268086409 | 5,48E-03  | 9,41E-01 | 1,00E+00 | Gm8055        | 0,96 | No  |
| ENSMUSG00000096172 | 1,81E+00  | -3,10765737  | 1,28E+00  | 2,58E-01 | 5,50E-01 | Gm22992       | 3,49 | No  |
| ENSMUSG00000096173 | -4,87E-02 | 5,949844937  | 5,51E-01  | 4,58E-01 | 7,47E-01 | Gm3150        | 0,97 | No  |
| ENSMUSG00000096174 | -1,87E+00 | -3,107637761 | 1,39E+00  | 2,38E-01 | 5,50E-01 | Gm22991       | 0,27 | No  |
| ENSMUSG00000096177 | -1,31E+00 | -2,226196745 | 2,93E+00  | 8,68E-02 | 3,78E-01 | Gm5070        | 0,40 | No  |
| ENSMUSG00000096184 | 5,93E-01  | -2,401359536 | 3,92E-01  | 5,31E-01 | 8,05E-01 | Gm23304       | 1,51 | No  |
| ENSMUSG00000096188 | 2,79E-01  | 4,847984528  | 1,34E+01  | 2,54E-04 | 5,31E-03 | Cmtm4         | 1,21 | Yes |
| ENSMUSG00000096191 | 1,14E-01  | -2,497557776 | 1,41E-02  | 9,06E-01 | 1,00E+00 | Gm26135       | 1,08 | No  |
| ENSMUSG00000096192 | -6,19E-01 | -1,412997192 | 1,34E+00  | 2,46E-01 | 5,50E-01 | Gm18856       | 0,65 | No  |
| ENSMUSG00000096199 | 1,85E-01  | 4,449165     | 5,14E+00  | 2,34E-02 | 1,68E-01 | Ptrhd1        | 1,14 | No  |
| ENSMUSG00000096201 | -1,14E-02 | -3,033635021 | 1,50E-05  | 9,97E-01 | 1,00E+00 | Gm10715       | 0,99 | No  |
| ENSMUSG00000096205 | 8,12E-01  | -2,711748085 | 5,74E-01  | 4,49E-01 | 7,39E-01 | Gm22068       | 1,76 | No  |
| ENSMUSG00000096206 | -5,74E-01 | -2,711687686 | 2,59E-01  | 6,11E-01 | 8,52E-01 | Gm22317       | 0,67 | No  |

|                    |           |              |          |          |          |               |      |    |
|--------------------|-----------|--------------|----------|----------|----------|---------------|------|----|
| ENSMUSG00000096210 | -3,63E-02 | 7,006153433  | 3,56E-01 | 5,51E-01 | 8,17E-01 | H1f0          | 0,98 | No |
| ENSMUSG00000096214 | -1,72E+00 | -2,60063458  | 2,06E+00 | 1,51E-01 | 4,92E-01 | Gm22634       | 0,30 | No |
| ENSMUSG00000096215 | -1,76E+00 | -2,831957858 | 2,17E+00 | 1,41E-01 | 4,74E-01 | Smim22        | 0,29 | No |
| ENSMUSG00000096221 | -1,19E-01 | 3,52436729   | 1,48E+00 | 2,24E-01 | 5,50E-01 | 1500002C15Rik | 0,92 | No |
| ENSMUSG00000096233 | -3,38E-04 | 0,712941752  | 2,27E-06 | 9,99E-01 | 1,00E+00 | Gm13238       | 1,00 | No |
| ENSMUSG00000096243 | -3,28E-01 | -1,929293704 | 3,00E-01 | 5,84E-01 | 8,38E-01 | Gm24265       | 0,80 | No |
| ENSMUSG00000096255 | 1,20E-01  | 3,654009921  | 1,54E+00 | 2,15E-01 | 5,50E-01 | Dynlt1b       | 1,09 | No |
| ENSMUSG00000096257 | -7,34E-01 | -0,231195051 | 5,09E+00 | 2,40E-02 | 1,70E-01 | Ccer2         | 0,60 | No |
| ENSMUSG00000096263 | 5,44E-01  | -1,697444474 | 7,57E-01 | 3,84E-01 | 6,86E-01 | Snord14c      | 1,46 | No |
| ENSMUSG00000096265 | 1,87E+00  | -3,033632735 | 1,36E+00 | 2,43E-01 | 5,50E-01 | 4930467E23Rik | 3,66 | No |
| ENSMUSG00000096276 | -2,70E+00 | -3,033614577 | 2,89E+00 | 8,93E-02 | 3,79E-01 | Gm2042        | 0,15 | No |
| ENSMUSG00000096292 | 1,60E+00  | -2,655153464 | 1,76E+00 | 1,84E-01 | 5,48E-01 | Gm2666        | 3,04 | No |
| ENSMUSG00000096296 | -2,20E-02 | -0,032799645 | 5,01E-03 | 9,44E-01 | 1,00E+00 | Snord88c      | 0,98 | No |
| ENSMUSG00000096297 | 8,17E-01  | -2,497576804 | 5,81E-01 | 4,46E-01 | 7,37E-01 | Gm23934       | 1,76 | No |
| ENSMUSG00000096299 | -5,14E-01 | -2,600585521 | 2,08E-01 | 6,49E-01 | 8,75E-01 | Gm21814       | 0,70 | No |
| ENSMUSG00000096300 | -3,20E+00 | -2,831968562 | 4,32E+00 | 3,78E-02 | 2,31E-01 | Gm25212       | 0,11 | No |
| ENSMUSG00000096307 | -1,90E+00 | -2,963239763 | 1,44E+00 | 2,31E-01 | 5,50E-01 | n-R5s104      | 0,27 | No |
| ENSMUSG00000096309 | -1,94E+00 | -3,107619243 | 1,50E+00 | 2,21E-01 | 5,50E-01 | Gm25208       | 0,26 | No |
| ENSMUSG00000096310 | 1,85E+00  | -3,107657832 | 1,35E+00 | 2,46E-01 | 5,50E-01 | Gm23523       | 3,61 | No |
| ENSMUSG00000096316 | -1,94E+00 | -3,107619243 | 1,50E+00 | 2,21E-01 | 5,50E-01 | Faiml         | 0,26 | No |
| ENSMUSG00000096326 | 1,81E+00  | -3,10765737  | 1,28E+00 | 2,58E-01 | 5,50E-01 | lghv1-78      | 3,49 | No |
| ENSMUSG00000096329 | -3,88E-03 | -3,03362684  | 4,02E-12 | 1,00E+00 | 1,00E+00 | Trav13d-4     | 1,00 | No |
| ENSMUSG00000096330 | 1,85E+00  | -3,107657832 | 1,35E+00 | 2,46E-01 | 5,50E-01 | Gm21976       | 3,61 | No |
| ENSMUSG00000096335 | -2,70E+00 | -3,033614577 | 2,89E+00 | 8,93E-02 | 3,79E-01 | n-R5s108      | 0,15 | No |
| ENSMUSG00000096336 | 1,87E+00  | -3,107639691 | 1,38E+00 | 2,40E-01 | 5,50E-01 | Igkv1-135     | 3,67 | No |
| ENSMUSG00000096337 | 2,49E-01  | 1,518033403  | 2,05E+00 | 1,52E-01 | 4,94E-01 | Gm13694       | 1,19 | No |
| ENSMUSG00000096343 | -2,70E-01 | -2,683092426 | 6,17E-02 | 8,04E-01 | 9,62E-01 | n-R5s133      | 0,83 | No |
| ENSMUSG00000096346 | -2,03E+00 | -2,600667231 | 3,11E+00 | 7,79E-02 | 3,56E-01 | Gm22887       | 0,25 | No |
| ENSMUSG00000096349 | -2,03E+00 | -2,226239754 | 5,10E+00 | 2,40E-02 | 1,70E-01 | Gm22513       | 0,24 | No |
| ENSMUSG00000096350 | -6,81E-02 | -2,896169782 | 2,04E-03 | 9,64E-01 | 1,00E+00 | Gm25707       | 0,95 | No |
| ENSMUSG00000096351 | -4,92E-02 | 3,453134528  | 2,42E-01 | 6,23E-01 | 8,58E-01 | Samd11        | 0,97 | No |
| ENSMUSG00000096354 | -1,87E+00 | -3,107637761 | 1,39E+00 | 2,38E-01 | 5,50E-01 | Gm8178        | 0,27 | No |

|                    |           |              |           |          |          |            |  |      |    |
|--------------------|-----------|--------------|-----------|----------|----------|------------|--|------|----|
| ENSMUSG00000096356 | 1,82E+00  | -3,033661385 | 1,31E+00  | 2,52E-01 | 5,50E-01 | Olf889     |  | 3,54 | No |
| ENSMUSG00000096357 | 3,18E-01  | -2,600700523 | 1,03E-01  | 7,48E-01 | 9,30E-01 | Gm25709    |  | 1,25 | No |
| ENSMUSG00000096361 | -1,40E-01 | 4,163100672  | 2,71E+00  | 9,95E-02 | 3,92E-01 | Gm5814     |  | 0,91 | No |
| ENSMUSG00000096366 | 8,05E-01  | -0,425092867 | 5,07E+00  | 2,44E-02 | 1,72E-01 | Gm13240    |  | 1,75 | No |
| ENSMUSG00000096367 | -9,12E-01 | -2,574195683 | 5,91E-01  | 4,42E-01 | 7,34E-01 | n-R5s107   |  | 0,53 | No |
| ENSMUSG00000096370 | 1,09E-02  | 4,113801399  | 1,60E-02  | 8,99E-01 | 1,00E+00 | Gm21992    |  | 1,01 | No |
| ENSMUSG00000096373 | 2,13E+00  | -3,082814437 | 1,74E+00  | 1,88E-01 | 5,50E-01 | Vmn2r31    |  | 4,37 | No |
| ENSMUSG00000096375 | -5,57E-01 | 0,358935502  | 4,85E+00  | 2,76E-02 | 1,87E-01 | Gm7094     |  | 0,68 | No |
| ENSMUSG00000096377 | -5,08E-01 | -2,600695898 | 1,30E-01  | 7,19E-01 | 9,15E-01 | Mir5123    |  | 0,70 | No |
| ENSMUSG00000096385 | -2,00E+00 | -2,205712123 | 4,93E+00  | 2,65E-02 | 1,82E-01 | Gm11168    |  | 0,25 | No |
| ENSMUSG00000096398 | -2,66E+00 | -2,96323193  | 2,82E+00  | 9,29E-02 | 3,83E-01 | Gm23689    |  | 0,16 | No |
| ENSMUSG00000096400 | -1,94E+00 | -3,107619243 | 1,50E+00  | 2,21E-01 | 5,50E-01 | Gm6098     |  | 0,26 | No |
| ENSMUSG00000096401 | -1,92E-01 | 3,589992756  | 3,87E+00  | 4,92E-02 | 2,68E-01 | Gm21811    |  | 0,88 | No |
| ENSMUSG00000096402 | -1,89E+00 | -3,1076441   | 1,42E+00  | 2,33E-01 | 5,50E-01 | Gm23816    |  | 0,27 | No |
| ENSMUSG00000096403 | 4,90E-02  | 5,294311318  | 4,77E-01  | 4,90E-01 | 7,76E-01 | Gm9825     |  | 1,03 | No |
| ENSMUSG00000096406 | -2,49E-02 | -3,146121042 | -4,44E-11 | 1,00E+00 | 1,00E+00 | Rn5s       |  | 0,98 | No |
| ENSMUSG00000096410 | -5,99E-02 | -2,963282181 | -7,02E-11 | 1,00E+00 | 1,00E+00 | Ighv1-19   |  | 0,96 | No |
| ENSMUSG00000096411 | 5,97E-03  | -3,1461183   | -3,40E-10 | 1,00E+00 | 1,00E+00 | Gm24721    |  | 1,00 | No |
| ENSMUSG00000096412 | 3,14E-02  | -3,107617333 | -7,69E-10 | 1,00E+00 | 1,00E+00 | Gm25484    |  | 1,02 | No |
| ENSMUSG00000096415 | -7,69E-02 | -2,401368277 | 8,20E-03  | 9,28E-01 | 1,00E+00 | Gm24722    |  | 0,95 | No |
| ENSMUSG00000096423 | -9,44E-01 | -2,600661612 | 7,82E-01  | 3,77E-01 | 6,78E-01 | Gm24978    |  | 0,52 | No |
| ENSMUSG00000096425 | -1,89E+00 | -3,1076441   | 1,42E+00  | 2,33E-01 | 5,50E-01 | Gm24979    |  | 0,27 | No |
| ENSMUSG00000096433 | -4,17E-03 | 3,167194442  | 1,52E-03  | 9,69E-01 | 1,00E+00 | Zfp994     |  | 1,00 | No |
| ENSMUSG00000096434 | 1,85E+00  | -3,107657832 | 1,35E+00  | 2,46E-01 | 5,50E-01 | Gm22129    |  | 3,61 | No |
| ENSMUSG00000096440 | 1,22E+00  | -2,896144472 | 9,21E-01  | 3,37E-01 | 6,38E-01 | Vmn2r-ps20 |  | 2,33 | No |
| ENSMUSG00000096448 | 1,31E-01  | -0,015543341 | 1,73E-01  | 6,77E-01 | 8,92E-01 | Gm5808     |  | 1,09 | No |
| ENSMUSG00000096449 | -8,39E-01 | -2,832036205 | 3,86E-01  | 5,34E-01 | 8,07E-01 | Gm4076     |  | 0,56 | No |
| ENSMUSG00000096452 | 3,14E-02  | -3,107617333 | -7,69E-10 | 1,00E+00 | 1,00E+00 | Ighv1-77   |  | 1,02 | No |
| ENSMUSG00000096458 | -3,01E-02 | 2,210710033  | 4,53E-02  | 8,31E-01 | 9,78E-01 | Moap1      |  | 0,98 | No |
| ENSMUSG00000096459 | -2,25E-02 | -2,963247595 | 1,86E-11  | 1,00E+00 | 1,00E+00 | Ighv9-3    |  | 0,98 | No |
| ENSMUSG00000096463 | 1,85E+00  | -3,107657832 | 1,35E+00  | 2,46E-01 | 5,50E-01 | Gm21750    |  | 3,61 | No |
| ENSMUSG00000096464 | -1,89E+00 | -3,1076441   | 1,42E+00  | 2,33E-01 | 5,50E-01 | Ighv2-2    |  | 0,27 | No |

|                    |           |              |           |          |          |               |      |     |
|--------------------|-----------|--------------|-----------|----------|----------|---------------|------|-----|
| ENSMUSG00000096472 | 3,45E-03  | 4,517847656  | 1,84E-03  | 9,66E-01 | 1,00E+00 | Cdkn2d        | 1,00 | No  |
| ENSMUSG00000096473 | 8,44E-01  | -2,711742678 | 6,22E-01  | 4,30E-01 | 7,24E-01 | Gm24463       | 1,80 | No  |
| ENSMUSG00000096474 | -4,57E-02 | 3,362593174  | 2,03E-01  | 6,53E-01 | 8,78E-01 | Gm5561        | 0,97 | No  |
| ENSMUSG00000096476 | -1,89E+00 | -3,1076441   | 1,42E+00  | 2,33E-01 | 5,50E-01 | Gm12453       | 0,27 | No  |
| ENSMUSG00000096480 | -8,45E-01 | -2,963229433 | 3,92E-01  | 5,31E-01 | 8,05E-01 | Gm23976       | 0,56 | No  |
| ENSMUSG00000096484 | -1,41E-01 | 1,288351194  | 5,81E-01  | 4,46E-01 | 7,37E-01 | Gm13696       | 0,91 | No  |
| ENSMUSG00000096499 | -3,26E+00 | -2,963184148 | 4,48E+00  | 3,43E-02 | 2,18E-01 | Ighv1-5       | 0,10 | No  |
| ENSMUSG00000096505 | -1,23E+00 | -3,146117124 | 7,12E-01  | 3,99E-01 | 6,98E-01 | Trav4d-4      | 0,42 | No  |
| ENSMUSG00000096510 | 1,25E+00  | -2,896162977 | 9,69E-01  | 3,25E-01 | 6,26E-01 | Gm25892       | 2,38 | No  |
| ENSMUSG00000096517 | -4,87E-02 | -2,896149255 | 1,54E-03  | 9,69E-01 | 1,00E+00 | Gm6919        | 0,97 | No  |
| ENSMUSG00000096519 | -1,74E+00 | -2,963250145 | 1,50E+00  | 2,21E-01 | 5,50E-01 | Gm10721       | 0,30 | No  |
| ENSMUSG00000096527 | -1,87E+00 | -3,107637761 | 1,39E+00  | 2,38E-01 | 5,50E-01 | Gm6370        | 0,27 | No  |
| ENSMUSG00000096528 | -1,89E+00 | -3,1076441   | 1,42E+00  | 2,33E-01 | 5,50E-01 | G430049J08Rik | 0,27 | No  |
| ENSMUSG00000096537 | -1,87E+00 | -3,107637761 | 1,39E+00  | 2,38E-01 | 5,50E-01 | Fam240b       | 0,27 | No  |
| ENSMUSG00000096544 | -1,44E-01 | 7,876821099  | 6,09E+00  | 1,36E-02 | 1,17E-01 | Gm4617        | 0,90 | No  |
| ENSMUSG00000096547 | -1,87E+00 | -3,107637761 | 1,39E+00  | 2,38E-01 | 5,50E-01 | Gm25235       | 0,27 | No  |
| ENSMUSG00000096549 | 1,30E-01  | -0,80635392  | 1,09E-01  | 7,41E-01 | 9,27E-01 | Prickle4      | 1,09 | No  |
| ENSMUSG00000096553 | -5,20E-01 | -2,522652395 | 3,21E-01  | 5,71E-01 | 8,31E-01 | Gm10097       | 0,70 | No  |
| ENSMUSG00000096557 | -6,69E-01 | -1,627677065 | 1,33E+00  | 2,48E-01 | 5,50E-01 | Gm7258        | 0,63 | No  |
| ENSMUSG00000096559 | -1,98E-02 | -3,033655952 | 2,83E-11  | 1,00E+00 | 1,00E+00 | Gm23567       | 0,99 | No  |
| ENSMUSG00000096561 | 5,97E-03  | -3,1461183   | -3,40E-10 | 1,00E+00 | 1,00E+00 | Gm24097       | 1,00 | No  |
| ENSMUSG00000096563 | -2,69E+00 | -3,033630172 | 2,87E+00  | 9,04E-02 | 3,81E-01 | Gm24095       | 0,16 | No  |
| ENSMUSG00000096573 | 4,65E-01  | -2,711726681 | 1,69E-01  | 6,81E-01 | 8,94E-01 | 1700009J07Rik | 1,38 | No  |
| ENSMUSG00000096574 | -2,65E+00 | -3,033633091 | 2,78E+00  | 9,55E-02 | 3,86E-01 | Gm2956        | 0,16 | No  |
| ENSMUSG00000096576 | -1,89E+00 | -3,033648118 | 1,42E+00  | 2,33E-01 | 5,50E-01 | Oog1          | 0,27 | No  |
| ENSMUSG00000096578 | -6,03E-01 | -1,268164965 | 1,63E+00  | 2,01E-01 | 5,50E-01 | Gm9529        | 0,66 | No  |
| ENSMUSG00000096579 | 4,34E-02  | 4,429178988  | 2,77E-01  | 5,99E-01 | 8,46E-01 | Gm17121       | 1,03 | No  |
| ENSMUSG00000096582 | 1,81E+00  | -2,963282131 | 1,30E+00  | 2,54E-01 | 5,50E-01 | Gm13289       | 3,50 | No  |
| ENSMUSG00000096591 | 1,60E+00  | -2,832054469 | 1,75E+00  | 1,86E-01 | 5,50E-01 | Gm13272       | 3,03 | No  |
| ENSMUSG00000096592 | 2,06E-01  | 4,003703267  | 5,28E+00  | 2,15E-02 | 1,58E-01 | Gm15801       | 1,15 | No  |
| ENSMUSG00000096594 | 4,24E-02  | -3,033592245 | -1,17E-09 | 1,00E+00 | 1,00E+00 | Igkv8-19      | 1,03 | No  |
| ENSMUSG00000096606 | 5,10E-01  | 2,451391963  | 1,52E+01  | 9,61E-05 | 2,34E-03 | Tpbgl         | 1,42 | Yes |

|                    |           |              |           |          |          |               |      |     |
|--------------------|-----------|--------------|-----------|----------|----------|---------------|------|-----|
| ENSMUSG00000096607 | 1,81E+00  | -3,10765737  | 1,28E+00  | 2,58E-01 | 5,50E-01 | 7530416G11Rik | 3,49 | No  |
| ENSMUSG00000096617 | 8,07E-02  | 8,04086646   | 1,92E+00  | 1,65E-01 | 5,18E-01 | Gm5559        | 1,06 | No  |
| ENSMUSG00000096629 | 6,94E-01  | -2,963285211 | 2,59E-01  | 6,11E-01 | 8,52E-01 | Gm3383        | 1,62 | No  |
| ENSMUSG00000096630 | -1,89E+00 | -3,1076441   | 1,42E+00  | 2,33E-01 | 5,50E-01 | Vmn2r26       | 0,27 | No  |
| ENSMUSG00000096632 | -5,88E-02 | -3,033652696 | 1,62E-03  | 9,68E-01 | 1,00E+00 | Igkv9-124     | 0,96 | No  |
| ENSMUSG00000096633 | 7,36E-01  | -2,655067574 | 2,95E-01  | 5,87E-01 | 8,40E-01 | Gm22170       | 1,67 | No  |
| ENSMUSG00000096647 | 1,71E-01  | 3,75842966   | 3,34E+00  | 6,77E-02 | 3,28E-01 | Gm6223        | 1,13 | No  |
| ENSMUSG00000096655 | 6,96E-01  | -1,614202627 | 1,30E+00  | 2,53E-01 | 5,50E-01 | 1700065D16Rik | 1,62 | No  |
| ENSMUSG00000096659 | -2,00E+00 | -2,548175728 | 3,03E+00  | 8,15E-02 | 3,67E-01 | Gm25679       | 0,25 | No  |
| ENSMUSG00000096672 | 1,27E+00  | -2,832026722 | 9,94E-01  | 3,19E-01 | 6,19E-01 | Ighv1-63      | 2,40 | No  |
| ENSMUSG00000096675 | -1,98E-02 | -3,033655952 | 2,83E-11  | 1,00E+00 | 1,00E+00 | Gm24519       | 0,99 | No  |
| ENSMUSG00000096681 | -2,34E-01 | 5,46929137   | 1,14E+01  | 7,31E-04 | 1,25E-02 | Rps19-ps1     | 0,85 | Yes |
| ENSMUSG00000096684 | 3,14E+00  | -2,89616069  | 4,02E+00  | 4,51E-02 | 2,53E-01 | Gm25989       | 8,80 | No  |
| ENSMUSG00000096687 | 1,77E-01  | 3,540669081  | 3,30E+00  | 6,95E-02 | 3,32E-01 | Mfsd4b4       | 1,13 | No  |
| ENSMUSG00000096691 | 1,81E+00  | -3,10765737  | 1,28E+00  | 2,58E-01 | 5,50E-01 | Vmn2r33       | 3,49 | No  |
| ENSMUSG00000096696 | 3,89E-02  | 1,539340677  | 5,38E-02  | 8,17E-01 | 9,69E-01 | Zfp960        | 1,03 | No  |
| ENSMUSG00000096699 | -2,18E-01 | 5,116087193  | 9,01E+00  | 2,68E-03 | 3,51E-02 | Rps19-ps4     | 0,86 | Yes |
| ENSMUSG00000096710 | -4,12E+00 | -2,711668086 | 8,63E+00  | 3,30E-03 | 4,12E-02 | n-R5s117      | 0,06 | Yes |
| ENSMUSG00000096712 | -5,85E-02 | 3,794311082  | 3,94E-01  | 5,30E-01 | 8,05E-01 | Gm15454       | 0,96 | No  |
| ENSMUSG00000096713 | 3,14E-02  | -3,107617333 | -7,69E-10 | 1,00E+00 | 1,00E+00 | Gm23148       | 1,02 | No  |
| ENSMUSG00000096714 | 2,12E+00  | -2,401412038 | 3,60E+00  | 5,79E-02 | 2,97E-01 | Olfr699       | 4,35 | No  |
| ENSMUSG00000096718 | 5,36E-01  | 0,920149336  | 6,11E+00  | 1,34E-02 | 1,16E-01 | Zfp781        | 1,45 | No  |
| ENSMUSG00000096719 | -1,87E+00 | -3,107637761 | 1,39E+00  | 2,38E-01 | 5,50E-01 | Mrgpra2b      | 0,27 | No  |
| ENSMUSG00000096722 | -4,31E-02 | 1,140176604  | 4,97E-02  | 8,24E-01 | 9,73E-01 | Hmgb1-ps9     | 0,97 | No  |
| ENSMUSG00000096726 | -1,13E-01 | 2,210605425  | 6,24E-01  | 4,30E-01 | 7,23E-01 | Gm5558        | 0,92 | No  |
| ENSMUSG00000096727 | -2,78E-01 | 6,153366572  | 1,87E+01  | 1,54E-05 | 4,91E-04 | Psmb9         | 0,82 | Yes |
| ENSMUSG00000096729 | 1,95E-01  | 1,137727999  | 1,04E+00  | 3,08E-01 | 6,06E-01 | Gm13695       | 1,14 | No  |
| ENSMUSG00000096736 | -3,69E-01 | -2,627604927 | 1,54E-01  | 6,95E-01 | 9,02E-01 | Gm17535       | 0,77 | No  |
| ENSMUSG00000096740 | 7,43E-03  | 3,119742328  | 4,63E-03  | 9,46E-01 | 1,00E+00 | Lbhd1         | 1,01 | No  |
| ENSMUSG00000096751 | -5,65E-02 | -1,497475587 | 1,01E-02  | 9,20E-01 | 1,00E+00 | Gm28373       | 0,96 | No  |
| ENSMUSG00000096753 | -1,94E+00 | -3,107619243 | 1,50E+00  | 2,21E-01 | 5,50E-01 | Fam181a       | 0,26 | No  |
| ENSMUSG00000096755 | -1,84E-01 | 0,734556219  | 6,36E-01  | 4,25E-01 | 7,19E-01 | Ftl1-ps2      | 0,88 | No  |

|                    |           |              |           |          |          |             |      |     |
|--------------------|-----------|--------------|-----------|----------|----------|-------------|------|-----|
| ENSMUSG00000096764 | 3,03E-02  | 5,03817307   | 1,69E-01  | 6,81E-01 | 8,94E-01 | Gm21985     | 1,02 | No  |
| ENSMUSG00000096765 | -1,89E+00 | -3,1076441   | 1,42E+00  | 2,33E-01 | 5,50E-01 | n-R5s144    | 0,27 | No  |
| ENSMUSG00000096771 | -1,34E+00 | -2,896122948 | 1,12E+00  | 2,89E-01 | 5,85E-01 | Gm22115     | 0,39 | No  |
| ENSMUSG00000096775 | -2,72E+00 | -2,896078137 | 2,94E+00  | 8,66E-02 | 3,78E-01 | Gm5796      | 0,15 | No  |
| ENSMUSG00000096779 | 9,01E-03  | -3,107646452 | -5,16E-10 | 1,00E+00 | 1,00E+00 | Gm22112     | 1,01 | No  |
| ENSMUSG00000096780 | 2,03E-01  | 5,166771993  | 7,91E+00  | 4,90E-03 | 5,52E-02 | Tmem181b-ps | 1,15 | No  |
| ENSMUSG00000096784 | -1,94E+00 | -3,107619243 | 1,50E+00  | 2,21E-01 | 5,50E-01 | Gm24643     | 0,26 | No  |
| ENSMUSG00000096795 | 3,52E-01  | 1,99098992   | 5,18E+00  | 2,28E-02 | 1,65E-01 | Zfp433      | 1,28 | No  |
| ENSMUSG00000096802 | 1,18E-01  | -0,887948845 | 8,60E-02  | 7,69E-01 | 9,42E-01 | Gm15433     | 1,08 | No  |
| ENSMUSG00000096809 | 1,83E+00  | -2,96327665  | 1,33E+00  | 2,49E-01 | 5,50E-01 | Gm23410     | 3,57 | No  |
| ENSMUSG00000096810 | 1,63E-01  | 5,161513212  | 5,09E+00  | 2,40E-02 | 1,70E-01 | Gm10481     | 1,12 | No  |
| ENSMUSG00000096818 | -5,25E-02 | -2,548175192 | 3,13E-03  | 9,55E-01 | 1,00E+00 | Gm29231     | 0,96 | No  |
| ENSMUSG00000096822 | -1,89E+00 | -3,033648118 | 1,42E+00  | 2,33E-01 | 5,50E-01 | Olf344      | 0,27 | No  |
| ENSMUSG00000096823 | -1,87E+00 | -3,107637761 | 1,39E+00  | 2,38E-01 | 5,50E-01 | Gm24569     | 0,27 | No  |
| ENSMUSG00000096826 | -1,98E-02 | -3,033655952 | 2,83E-11  | 1,00E+00 | 1,00E+00 | Ccl27b      | 0,99 | No  |
| ENSMUSG00000096832 | 2,29E+00  | -2,863700231 | 2,01E+00  | 1,57E-01 | 5,02E-01 | Mir3096     | 4,89 | No  |
| ENSMUSG00000096833 | -1,14E-02 | -3,033635021 | 1,50E-05  | 9,97E-01 | 1,00E+00 | Igkv4-55    | 0,99 | No  |
| ENSMUSG00000096838 | -1,89E+00 | -3,033648118 | 1,42E+00  | 2,33E-01 | 5,50E-01 | Gm26232     | 0,27 | No  |
| ENSMUSG00000096839 | -1,87E+00 | -3,107637761 | 1,39E+00  | 2,38E-01 | 5,50E-01 | Gm3460      | 0,27 | No  |
| ENSMUSG00000096841 | 6,46E-01  | -0,24728787  | 3,47E+00  | 6,27E-02 | 3,12E-01 | Gm25596     | 1,56 | No  |
| ENSMUSG00000096842 | -2,39E-01 | 7,499124735  | 1,63E+01  | 5,38E-05 | 1,44E-03 | Gm10736     | 0,85 | Yes |
| ENSMUSG00000096846 | -1,94E+00 | -3,107619243 | 1,50E+00  | 2,21E-01 | 5,50E-01 | Gm8890      | 0,26 | No  |
| ENSMUSG00000096847 | -1,01E+00 | 1,359650667  | 3,12E+01  | 2,36E-08 | 1,51E-06 | Tmem151b    | 0,50 | Yes |
| ENSMUSG00000096854 | -2,70E+00 | -2,896043557 | 2,88E+00  | 8,95E-02 | 3,79E-01 | Ifnz        | 0,15 | No  |
| ENSMUSG00000096855 | 1,22E+00  | -3,146114919 | 6,90E-01  | 4,06E-01 | 7,02E-01 | n-R5s120    | 2,33 | No  |
| ENSMUSG00000096856 | 5,77E-01  | 0,111989316  | 4,09E+00  | 4,31E-02 | 2,47E-01 | Gm10778     | 1,49 | No  |
| ENSMUSG00000096862 | -1,89E+00 | -3,1076441   | 1,42E+00  | 2,33E-01 | 5,50E-01 | Gm13301     | 0,27 | No  |
| ENSMUSG00000096869 | -1,94E+00 | -3,107619243 | 1,50E+00  | 2,21E-01 | 5,50E-01 | Gm6676      | 0,26 | No  |
| ENSMUSG00000096872 | 3,12E+00  | -2,8961712   | 3,97E+00  | 4,64E-02 | 2,57E-01 | Scgb2a2     | 8,68 | No  |
| ENSMUSG00000096874 | 9,01E-03  | -3,107646452 | -5,16E-10 | 1,00E+00 | 1,00E+00 | Gm10312     | 1,01 | No  |
| ENSMUSG00000096879 | -7,38E-02 | -3,033659033 | 2,66E-03  | 9,59E-01 | 1,00E+00 | Gm4858      | 0,95 | No  |
| ENSMUSG00000096883 | 2,31E-01  | -1,460748429 | 1,80E-01  | 6,72E-01 | 8,89E-01 | Shisa8      | 1,17 | No  |

|                    |           |              |           |          |          |               |      |     |
|--------------------|-----------|--------------|-----------|----------|----------|---------------|------|-----|
| ENSMUSG00000096890 | -1,94E+00 | -3,107619243 | 1,50E+00  | 2,21E-01 | 5,50E-01 | Gm20797       | 0,26 | No  |
| ENSMUSG00000096895 | 1,81E+00  | -3,10765737  | 1,28E+00  | 2,58E-01 | 5,50E-01 | Gm25245       | 3,49 | No  |
| ENSMUSG00000096904 | 2,67E+00  | -3,033636951 | 2,76E+00  | 9,68E-02 | 3,88E-01 | Gm3591        | 6,36 | No  |
| ENSMUSG00000096905 | -1,89E+00 | -3,1076441   | 1,42E+00  | 2,33E-01 | 5,50E-01 | Gm8324        | 0,27 | No  |
| ENSMUSG00000096910 | 1,14E-01  | 2,664560224  | 8,30E-01  | 3,62E-01 | 6,64E-01 | Zfp955b       | 1,08 | No  |
| ENSMUSG00000096914 | -1,89E+00 | -3,033648118 | 1,42E+00  | 2,33E-01 | 5,50E-01 | Galnt16       | 0,27 | No  |
| ENSMUSG00000096916 | -1,91E-01 | 2,680533604  | 2,44E+00  | 1,19E-01 | 4,28E-01 | Zfp850        | 0,88 | No  |
| ENSMUSG00000096917 | -4,21E-01 | 0,104055724  | 2,21E+00  | 1,37E-01 | 4,68E-01 | 2500002B13Rik | 0,75 | No  |
| ENSMUSG00000096920 | -9,25E-01 | -2,770592162 | 7,47E-01  | 3,87E-01 | 6,87E-01 | Rps19-ps8     | 0,53 | No  |
| ENSMUSG00000096923 | -1,10E-01 | 1,128341765  | 3,05E-01  | 5,81E-01 | 8,37E-01 | A730071L15Rik | 0,93 | No  |
| ENSMUSG00000096924 | 4,88E-01  | 0,25532431   | 3,36E+00  | 6,69E-02 | 3,25E-01 | Gm26824       | 1,40 | No  |
| ENSMUSG00000096926 | -5,41E-01 | -0,226242363 | 2,79E+00  | 9,50E-02 | 3,86E-01 | Gm26823       | 0,69 | No  |
| ENSMUSG00000096929 | -1,31E-01 | 0,803543873  | 3,51E-01  | 5,53E-01 | 8,19E-01 | A330023F24Rik | 0,91 | No  |
| ENSMUSG00000096930 | 8,10E-01  | -2,600690781 | 5,71E-01  | 4,50E-01 | 7,40E-01 | Gm26657       | 1,75 | No  |
| ENSMUSG00000096931 | -2,87E-01 | -2,165696999 | 1,34E-01  | 7,15E-01 | 9,12E-01 | Gm26656       | 0,82 | No  |
| ENSMUSG00000096932 | 7,49E-01  | -0,529008638 | 4,11E+00  | 4,26E-02 | 2,45E-01 | 5033403F01Rik | 1,68 | No  |
| ENSMUSG00000096934 | -1,94E+00 | -3,107619243 | 1,50E+00  | 2,21E-01 | 5,50E-01 | Gm26658       | 0,26 | No  |
| ENSMUSG00000096935 | -1,76E-01 | 1,676417476  | 1,14E+00  | 2,85E-01 | 5,81E-01 | 1700113A16Rik | 0,88 | No  |
| ENSMUSG00000096937 | 2,16E-01  | -0,855791302 | 2,76E-01  | 5,99E-01 | 8,46E-01 | Gm10825       | 1,16 | No  |
| ENSMUSG00000096938 | 4,60E-01  | 1,144038166  | 5,39E+00  | 2,03E-02 | 1,53E-01 | 9530052E02Rik | 1,38 | No  |
| ENSMUSG00000096940 | -5,43E-02 | -2,548264712 | 3,35E-03  | 9,54E-01 | 1,00E+00 | Gm4755        | 0,96 | No  |
| ENSMUSG00000096941 | 6,51E-02  | -1,051818651 | 2,23E-02  | 8,81E-01 | 1,00E+00 | Gm26720       | 1,05 | No  |
| ENSMUSG00000096942 | -3,04E-01 | 8,925599726  | 2,85E+01  | 9,44E-08 | 5,33E-06 | Rps19-ps6     | 0,81 | Yes |
| ENSMUSG00000096943 | 1,85E+00  | -3,107657832 | 1,35E+00  | 2,46E-01 | 5,50E-01 | Gm26721       | 3,61 | No  |
| ENSMUSG00000096944 | -8,27E-02 | 3,955733352  | 8,49E-01  | 3,57E-01 | 6,58E-01 | Gm26722       | 0,94 | No  |
| ENSMUSG00000096945 | -4,29E-01 | 0,341446195  | 2,62E+00  | 1,05E-01 | 3,98E-01 | Gm26546       | 0,74 | No  |
| ENSMUSG00000096947 | 9,90E-02  | 2,724698208  | 6,67E-01  | 4,14E-01 | 7,09E-01 | Gm26723       | 1,07 | No  |
| ENSMUSG00000096948 | -2,76E-01 | -2,472916018 | 8,26E-02  | 7,74E-01 | 9,44E-01 | Gm4221        | 0,83 | No  |
| ENSMUSG00000096950 | -2,44E-01 | 1,241090566  | 1,67E+00  | 1,96E-01 | 5,50E-01 | Gm9530        | 0,84 | No  |
| ENSMUSG00000096953 | 2,42E-01  | 0,858922834  | 1,18E+00  | 2,77E-01 | 5,74E-01 | Gm26571       | 1,18 | No  |
| ENSMUSG00000096954 | -1,55E-01 | 5,08716529   | 4,18E+00  | 4,10E-02 | 2,40E-01 | Gdap10        | 0,90 | No  |
| ENSMUSG00000096956 | 3,14E-02  | -3,107617333 | -7,69E-10 | 1,00E+00 | 1,00E+00 | Snhg18        | 1,02 | No  |

|                    |           |              |           |          |          |               |      |     |
|--------------------|-----------|--------------|-----------|----------|----------|---------------|------|-----|
| ENSMUSG00000096957 | -5,70E-01 | 1,182079236  | 7,79E+00  | 5,25E-03 | 5,79E-02 | E230013L22Rik | 0,67 | No  |
| ENSMUSG00000096958 | -6,81E-02 | -2,896157989 | 2,05E-03  | 9,64E-01 | 1,00E+00 | Gm26573       | 0,95 | No  |
| ENSMUSG00000096959 | 1,38E-03  | -0,344429927 | 1,82E-05  | 9,97E-01 | 1,00E+00 | 4930509G22Rik | 1,00 | No  |
| ENSMUSG00000096960 | 5,40E-01  | 0,627326024  | 4,72E+00  | 2,98E-02 | 1,97E-01 | A230028O05Rik | 1,45 | No  |
| ENSMUSG00000096962 | 3,14E-02  | -3,107617333 | -7,69E-10 | 1,00E+00 | 1,00E+00 | Gm26622       | 1,02 | No  |
| ENSMUSG00000096964 | 1,37E+00  | -2,448698769 | 1,92E+00  | 1,65E-01 | 5,18E-01 | Gm6345        | 2,59 | No  |
| ENSMUSG00000096965 | 4,09E-01  | -1,311022935 | 5,01E-01  | 4,79E-01 | 7,66E-01 | 3300005D01Rik | 1,33 | No  |
| ENSMUSG00000096967 | 2,98E-01  | -1,832054854 | 2,58E-01  | 6,12E-01 | 8,52E-01 | Gm26621       | 1,23 | No  |
| ENSMUSG00000096968 | 1,16E-01  | 0,476147312  | 2,18E-01  | 6,40E-01 | 8,70E-01 | Gm26620       | 1,08 | No  |
| ENSMUSG00000096969 | -1,82E-01 | 2,573008878  | 2,04E+00  | 1,54E-01 | 4,97E-01 | 4930535I16Rik | 0,88 | No  |
| ENSMUSG00000096971 | 1,96E-01  | -0,770640629 | 2,45E-01  | 6,20E-01 | 8,57E-01 | 4930556M19Rik | 1,15 | No  |
| ENSMUSG00000096974 | 2,50E-01  | -0,773168121 | 4,29E-01  | 5,13E-01 | 7,95E-01 | Gm26881       | 1,19 | No  |
| ENSMUSG00000096975 | -1,08E+00 | -0,895972574 | 7,29E+00  | 6,94E-03 | 7,13E-02 | Gm16386       | 0,47 | No  |
| ENSMUSG00000096976 | 1,03E-02  | 1,704940354  | 3,88E-03  | 9,50E-01 | 1,00E+00 | Gm26882       | 1,01 | No  |
| ENSMUSG00000096977 | 5,75E-01  | -2,088766671 | 5,60E-01  | 4,54E-01 | 7,44E-01 | Gm10827       | 1,49 | No  |
| ENSMUSG00000096979 | -1,93E-02 | 2,011630068  | 1,66E-02  | 8,98E-01 | 1,00E+00 | Gm26880       | 0,99 | No  |
| ENSMUSG00000096980 | 5,33E-02  | 3,739606495  | 3,24E-01  | 5,70E-01 | 8,30E-01 | Gm26526       | 1,04 | No  |
| ENSMUSG00000096981 | 1,38E-01  | 2,020005247  | 8,25E-01  | 3,64E-01 | 6,65E-01 | Gm16845       | 1,10 | No  |
| ENSMUSG00000096982 | -1,87E+00 | -3,107637761 | 1,39E+00  | 2,38E-01 | 5,50E-01 | Redrum        | 0,27 | No  |
| ENSMUSG00000096983 | -1,23E+00 | -2,146024664 | 2,51E+00  | 1,13E-01 | 4,14E-01 | 2010015M23Rik | 0,43 | No  |
| ENSMUSG00000096986 | -1,12E+00 | -1,24700147  | 4,54E+00  | 3,32E-02 | 2,13E-01 | 4930509E16Rik | 0,46 | No  |
| ENSMUSG00000096987 | -4,26E-01 | -2,740905666 | 1,12E-01  | 7,38E-01 | 9,26E-01 | Gm26525       | 0,74 | No  |
| ENSMUSG00000096988 | -6,80E-01 | -0,778090696 | 3,12E+00  | 7,73E-02 | 3,55E-01 | A930029G22Rik | 0,62 | No  |
| ENSMUSG00000096990 | 2,59E-01  | -2,355648191 | 1,12E-01  | 7,38E-01 | 9,26E-01 | Gm26790       | 1,20 | No  |
| ENSMUSG00000096991 | 2,75E-01  | 0,563114346  | 1,34E+00  | 2,48E-01 | 5,50E-01 | Gm26789       | 1,21 | No  |
| ENSMUSG00000096992 | 2,07E-01  | 1,019172212  | 9,56E-01  | 3,28E-01 | 6,29E-01 | Gm26788       | 1,15 | No  |
| ENSMUSG00000096993 | -7,88E-01 | -2,205860532 | 1,09E+00  | 2,98E-01 | 5,94E-01 | Gm26787       | 0,58 | No  |
| ENSMUSG00000096995 | 4,64E-01  | -1,006979822 | 1,09E+00  | 2,97E-01 | 5,93E-01 | 2810029C07Rik | 1,38 | No  |
| ENSMUSG00000096996 | -1,05E-01 | 2,665370702  | 7,35E-01  | 3,91E-01 | 6,91E-01 | Gm26792       | 0,93 | No  |
| ENSMUSG00000096999 | 2,64E+00  | -3,033673223 | 2,69E+00  | 1,01E-01 | 3,92E-01 | Gm26793       | 6,23 | No  |
| ENSMUSG00000097000 | 1,58E-01  | 1,210547431  | 6,59E-01  | 4,17E-01 | 7,12E-01 | Gm17435       | 1,12 | No  |
| ENSMUSG00000097004 | 2,74E-01  | 4,56775802   | 1,16E+01  | 6,58E-04 | 1,15E-02 | 4731419I09Rik | 1,21 | Yes |



|                    |           |              |          |          |          |               |      |     |
|--------------------|-----------|--------------|----------|----------|----------|---------------|------|-----|
| ENSMUSG00000097005 | 4,16E-01  | -2,832015918 | 1,34E-01 | 7,14E-01 | 9,12E-01 | 4930598A11Rik | 1,33 | No  |
| ENSMUSG00000097006 | -6,40E-02 | 3,713220326  | 4,57E-01 | 4,99E-01 | 7,84E-01 | 9530082P21Rik | 0,96 | No  |
| ENSMUSG00000097007 | -4,16E-01 | -2,800979815 | 1,07E-01 | 7,44E-01 | 9,29E-01 | 4930432B10Rik | 0,75 | No  |
| ENSMUSG00000097008 | -2,94E-01 | 1,16654054   | 2,19E+00 | 1,39E-01 | 4,70E-01 | Gm26860       | 0,82 | No  |
| ENSMUSG00000097009 | -1,94E+00 | -3,107619243 | 1,50E+00 | 2,21E-01 | 5,50E-01 | Gm26861       | 0,26 | No  |
| ENSMUSG00000097011 | -4,13E-02 | -3,033659495 | 7,08E-04 | 9,79E-01 | 1,00E+00 | Gm4651        | 0,97 | No  |
| ENSMUSG00000097012 | 8,81E-01  | -1,711758711 | 1,97E+00 | 1,60E-01 | 5,09E-01 | Gm16531       | 1,84 | No  |
| ENSMUSG00000097013 | -8,56E-01 | -2,033597437 | 1,32E+00 | 2,51E-01 | 5,50E-01 | Gm26710       | 0,55 | No  |
| ENSMUSG00000097014 | -1,27E+00 | -2,522639541 | 1,27E+00 | 2,59E-01 | 5,52E-01 | Gm26706       | 0,42 | No  |
| ENSMUSG00000097015 | -2,68E+00 | -2,963253845 | 2,85E+00 | 9,15E-02 | 3,82E-01 | Gm26705       | 0,16 | No  |
| ENSMUSG00000097016 | -1,60E-01 | -1,401305905 | 9,29E-02 | 7,61E-01 | 9,37E-01 | Gm26708       | 0,89 | No  |
| ENSMUSG00000097017 | -6,82E-01 | -1,997928993 | 9,26E-01 | 3,36E-01 | 6,37E-01 | Gm26707       | 0,62 | No  |
| ENSMUSG00000097019 | -2,06E-01 | -1,165723875 | 1,77E-01 | 6,74E-01 | 8,90E-01 | Gm26663       | 0,87 | No  |
| ENSMUSG00000097020 | -1,40E-02 | 1,446293877  | 6,23E-03 | 9,37E-01 | 1,00E+00 | Gm26613       | 0,99 | No  |
| ENSMUSG00000097021 | -9,99E-01 | -2,205757931 | 1,87E+00 | 1,71E-01 | 5,27E-01 | 4933433G15Rik | 0,50 | No  |
| ENSMUSG00000097022 | 6,09E-02  | -0,620874328 | 2,57E-02 | 8,73E-01 | 1,00E+00 | BC001981      | 1,04 | No  |
| ENSMUSG00000097023 | 7,27E-02  | 4,848147584  | 8,97E-01 | 3,44E-01 | 6,44E-01 | Mir9-3hg      | 1,05 | No  |
| ENSMUSG00000097025 | -2,41E-01 | 2,037796365  | 2,63E+00 | 1,05E-01 | 3,97E-01 | Gm26558       | 0,85 | No  |
| ENSMUSG00000097026 | 3,19E-01  | 3,644188319  | 1,11E+01 | 8,49E-04 | 1,41E-02 | Gm26786       | 1,25 | Yes |
| ENSMUSG00000097027 | 1,87E+00  | -3,03364371  | 1,36E+00 | 2,43E-01 | 5,50E-01 | Gm26559       | 3,66 | No  |
| ENSMUSG00000097028 | -2,70E+00 | -3,033614577 | 2,89E+00 | 8,93E-02 | 3,79E-01 | Ptgs2os       | 0,15 | No  |
| ENSMUSG00000097030 | 2,40E-01  | -0,726235685 | 4,17E-01 | 5,18E-01 | 7,98E-01 | Gm26693       | 1,18 | No  |
| ENSMUSG00000097032 | -2,74E-01 | 1,952948806  | 3,15E+00 | 7,61E-02 | 3,52E-01 | 4930539J05Rik | 0,83 | No  |
| ENSMUSG00000097033 | -1,63E-01 | 4,329217914  | 3,86E+00 | 4,93E-02 | 2,68E-01 | Gm26819       | 0,89 | No  |
| ENSMUSG00000097035 | 1,23E+00  | -2,711775759 | 9,40E-01 | 3,32E-01 | 6,33E-01 | Gm26692       | 2,35 | No  |
| ENSMUSG00000097039 | 1,73E-01  | 3,61297283   | 3,05E+00 | 8,05E-02 | 3,64E-01 | Pvt1          | 1,13 | No  |
| ENSMUSG00000097041 | 3,99E-02  | 3,491304382  | 1,62E-01 | 6,88E-01 | 8,98E-01 | Pafah1b1-ps1  | 1,03 | No  |
| ENSMUSG00000097042 | -1,52E-01 | 2,372915224  | 1,25E+00 | 2,63E-01 | 5,57E-01 | Gm17491       | 0,90 | No  |
| ENSMUSG00000097047 | 1,08E+00  | -1,711809766 | 3,14E+00 | 7,63E-02 | 3,52E-01 | 1110020A21Rik | 2,11 | No  |
| ENSMUSG00000097048 | -3,34E-01 | 2,509852645  | 7,12E+00 | 7,61E-03 | 7,63E-02 | 1600020E01Rik | 0,79 | No  |
| ENSMUSG00000097051 | -1,97E-01 | -0,879857485 | 2,10E-01 | 6,47E-01 | 8,74E-01 | Gm26836       | 0,87 | No  |
| ENSMUSG00000097052 | 7,36E-01  | -1,929379781 | 1,31E+00 | 2,53E-01 | 5,50E-01 | Snhg7         | 1,67 | No  |

|                    |           |              |           |          |          |               |      |    |
|--------------------|-----------|--------------|-----------|----------|----------|---------------|------|----|
| ENSMUSG00000097053 | 1,15E-01  | -1,311103937 | 4,94E-02  | 8,24E-01 | 9,73E-01 | Gm1972        | 1,08 | No |
| ENSMUSG00000097055 | 1,74E-01  | -1,655166702 | 9,20E-02  | 7,62E-01 | 9,38E-01 | Gm4419        | 1,13 | No |
| ENSMUSG00000097056 | -2,80E-01 | 0,575405452  | 1,38E+00  | 2,41E-01 | 5,50E-01 | Gm4262        | 0,82 | No |
| ENSMUSG00000097057 | 8,68E-03  | 4,481491108  | 1,15E-02  | 9,14E-01 | 1,00E+00 | Gm17638       | 1,01 | No |
| ENSMUSG00000097058 | -5,55E-02 | -1,051943083 | 1,58E-02  | 9,00E-01 | 1,00E+00 | 4930556M19Rik | 0,96 | No |
| ENSMUSG00000097059 | 1,27E-01  | 1,135989546  | 4,07E-01  | 5,23E-01 | 8,01E-01 | Fam120aos     | 1,09 | No |
| ENSMUSG00000097060 | -2,45E-03 | 4,864709774  | 1,05E-03  | 9,74E-01 | 1,00E+00 | Gm26759       | 1,00 | No |
| ENSMUSG00000097061 | -1,89E-01 | 2,404345425  | 1,96E+00  | 1,62E-01 | 5,11E-01 | 9330151L19Rik | 0,88 | No |
| ENSMUSG00000097062 | 1,79E-01  | 2,210579676  | 1,51E+00  | 2,19E-01 | 5,50E-01 | Gm17586       | 1,13 | No |
| ENSMUSG00000097068 | -8,70E-01 | -2,896137506 | 4,16E-01  | 5,19E-01 | 7,98E-01 | Gm26760       | 0,55 | No |
| ENSMUSG00000097069 | 5,17E-02  | -0,887874571 | 1,56E-02  | 9,01E-01 | 1,00E+00 | Gm16998       | 1,04 | No |
| ENSMUSG00000097071 | -3,83E-02 | -3,107651936 | -7,91E-11 | 1,00E+00 | 1,00E+00 | 4930544I03Rik | 0,97 | No |
| ENSMUSG00000097072 | 7,47E-01  | -1,997926061 | 9,95E-01  | 3,19E-01 | 6,19E-01 | Foxl2os       | 1,68 | No |
| ENSMUSG00000097073 | 1,25E-01  | -0,503821874 | 1,28E-01  | 7,20E-01 | 9,15E-01 | 9430037G07Rik | 1,09 | No |
| ENSMUSG00000097074 | -1,92E+00 | -3,070132283 | 1,46E+00  | 2,27E-01 | 5,50E-01 | 4833428L15Rik | 0,26 | No |
| ENSMUSG00000097075 | -1,05E-01 | 1,261053158  | 3,22E-01  | 5,71E-01 | 8,31E-01 | D830044I16Rik | 0,93 | No |
| ENSMUSG00000097076 | -4,55E-01 | -2,548211373 | 2,12E-01  | 6,45E-01 | 8,73E-01 | Platr7        | 0,73 | No |
| ENSMUSG00000097077 | 5,86E-02  | 3,228887118  | 3,05E-01  | 5,81E-01 | 8,37E-01 | Gm16712       | 1,04 | No |
| ENSMUSG00000097078 | 2,31E-01  | 2,494124256  | 3,19E+00  | 7,39E-02 | 3,46E-01 | Gm26566       | 1,17 | No |
| ENSMUSG00000097079 | -6,46E-01 | -2,268114056 | 6,90E-01  | 4,06E-01 | 7,03E-01 | Gm26604       | 0,64 | No |
| ENSMUSG00000097080 | 1,74E-01  | 0,630402939  | 5,46E-01  | 4,60E-01 | 7,49E-01 | 1700086O06Rik | 1,13 | No |
| ENSMUSG00000097081 | -3,51E-01 | 2,046602574  | 6,15E+00  | 1,31E-02 | 1,14E-01 | Gm10425       | 0,78 | No |
| ENSMUSG00000097082 | 4,24E-02  | -3,033592245 | -1,17E-09 | 1,00E+00 | 1,00E+00 | 4933440J02Rik | 1,03 | No |
| ENSMUSG00000097083 | 1,65E-02  | 0,641485515  | 4,93E-03  | 9,44E-01 | 1,00E+00 | D930019O06Rik | 1,01 | No |
| ENSMUSG00000097084 | -5,25E-02 | -3,033661434 | 4,08E-11  | 1,00E+00 | 1,00E+00 | Foxl1         | 0,96 | No |
| ENSMUSG00000097085 | -2,65E+00 | -2,963248364 | 2,80E+00  | 9,42E-02 | 3,84E-01 | Gm26634       | 0,16 | No |
| ENSMUSG00000097086 | 2,43E-01  | 1,529881524  | 1,96E+00  | 1,61E-01 | 5,10E-01 | Gm7672        | 1,18 | No |
| ENSMUSG00000097088 | -1,48E+00 | -2,401349608 | 2,28E+00  | 1,31E-01 | 4,55E-01 | Gm26615       | 0,36 | No |
| ENSMUSG00000097089 | 1,99E-01  | 2,344483245  | 2,23E+00  | 1,35E-01 | 4,64E-01 | Gm26879       | 1,15 | No |
| ENSMUSG00000097090 | 4,66E-01  | 1,101394282  | 5,23E+00  | 2,22E-02 | 1,61E-01 | Gm26724       | 1,38 | No |
| ENSMUSG00000097092 | -1,59E+00 | -2,472873829 | 2,72E+00  | 9,92E-02 | 3,92E-01 | Gm26725       | 0,33 | No |
| ENSMUSG00000097093 | 4,38E-01  | -0,755588856 | 1,17E+00  | 2,80E-01 | 5,76E-01 | C330013E15Rik | 1,36 | No |

|                    |           |              |          |          |          |               |      |     |
|--------------------|-----------|--------------|----------|----------|----------|---------------|------|-----|
| ENSMUSG00000097095 | 1,87E+00  | -3,107639691 | 1,38E+00 | 2,40E-01 | 5,50E-01 | Gm26547       | 3,67 | No  |
| ENSMUSG00000097098 | 2,96E-01  | -2,832024687 | 5,38E-02 | 8,17E-01 | 9,69E-01 | 9330111N05Rik | 1,23 | No  |
| ENSMUSG00000097099 | 1,37E-02  | 4,458536014  | 2,81E-02 | 8,67E-01 | 9,99E-01 | Gm9917        | 1,01 | No  |
| ENSMUSG00000097100 | 2,33E-01  | 1,200924107  | 1,39E+00 | 2,39E-01 | 5,50E-01 | 9230104M06Rik | 1,18 | No  |
| ENSMUSG00000097101 | 1,49E-01  | 2,491641694  | 1,34E+00 | 2,48E-01 | 5,50E-01 | 1810034E14Rik | 1,11 | No  |
| ENSMUSG00000097103 | 1,74E-01  | -1,683142994 | 9,18E-02 | 7,62E-01 | 9,38E-01 | Gm2885        | 1,13 | No  |
| ENSMUSG00000097106 | -8,45E-01 | -2,963265612 | 3,92E-01 | 5,31E-01 | 8,05E-01 | Rpl31-ps23    | 0,56 | No  |
| ENSMUSG00000097107 | -1,02E+00 | -2,311168814 | 1,60E+00 | 2,06E-01 | 5,50E-01 | Platr6        | 0,49 | No  |
| ENSMUSG00000097108 | 6,04E-02  | 0,023732505  | 4,64E-02 | 8,29E-01 | 9,77E-01 | Gm26581       | 1,04 | No  |
| ENSMUSG00000097111 | -2,69E-01 | -0,479014727 | 5,52E-01 | 4,57E-01 | 7,47E-01 | Peak1os       | 0,83 | No  |
| ENSMUSG00000097113 | 1,03E+00  | -1,929279602 | 2,06E+00 | 1,51E-01 | 4,93E-01 | Gm19705       | 2,04 | No  |
| ENSMUSG00000097115 | 1,46E+00  | -2,740852801 | 1,40E+00 | 2,37E-01 | 5,50E-01 | 1810019N24Rik | 2,75 | No  |
| ENSMUSG00000097117 | -1,94E+00 | -2,929301731 | 1,47E+00 | 2,25E-01 | 5,50E-01 | Gm26730       | 0,26 | No  |
| ENSMUSG00000097119 | 3,04E-01  | 2,79695933   | 6,83E+00 | 8,95E-03 | 8,60E-02 | B230354K17Rik | 1,23 | No  |
| ENSMUSG00000097120 | 2,26E-01  | -2,548226859 | 6,38E-02 | 8,01E-01 | 9,61E-01 | Gm26887       | 1,17 | No  |
| ENSMUSG00000097121 | -1,38E-01 | 3,352395826  | 1,79E+00 | 1,81E-01 | 5,43E-01 | D130020L05Rik | 0,91 | No  |
| ENSMUSG00000097122 | -2,32E-01 | 0,575458046  | 8,76E-01 | 3,49E-01 | 6,51E-01 | Gm26624       | 0,85 | No  |
| ENSMUSG00000097123 | -6,95E-02 | -1,655133947 | 1,41E-02 | 9,05E-01 | 1,00E+00 | Gm6297        | 0,95 | No  |
| ENSMUSG00000097125 | 4,44E-03  | 6,279585893  | 4,83E-03 | 9,45E-01 | 1,00E+00 | Gm26885       | 1,00 | No  |
| ENSMUSG00000097128 | -2,92E-01 | 1,313647987  | 2,58E+00 | 1,08E-01 | 4,04E-01 | Gm26884       | 0,82 | No  |
| ENSMUSG00000097129 | -1,63E-01 | 0,277454237  | 3,78E-01 | 5,38E-01 | 8,09E-01 | 4930507D05Rik | 0,89 | No  |
| ENSMUSG00000097131 | 7,89E-02  | -0,963285489 | 3,67E-02 | 8,48E-01 | 9,88E-01 | D230017M19Rik | 1,06 | No  |
| ENSMUSG00000097133 | 3,80E-01  | 1,370554457  | 4,33E+00 | 3,74E-02 | 2,30E-01 | Gm26628       | 1,30 | No  |
| ENSMUSG00000097134 | -7,46E-01 | 2,857524801  | 4,15E+01 | 1,16E-10 | 1,08E-08 | 1110002J07Rik | 0,60 | Yes |
| ENSMUSG00000097136 | -3,55E-01 | -0,24704516  | 1,32E+00 | 2,51E-01 | 5,50E-01 | Gm26772       | 0,78 | No  |
| ENSMUSG00000097137 | -6,96E-01 | -0,528953428 | 3,70E+00 | 5,45E-02 | 2,86E-01 | Gm26627       | 0,62 | No  |
| ENSMUSG00000097138 | 8,48E-02  | -0,600505784 | 5,10E-02 | 8,21E-01 | 9,72E-01 | Gm26625       | 1,06 | No  |
| ENSMUSG00000097139 | 1,03E-01  | 2,364315318  | 5,85E-01 | 4,45E-01 | 7,36E-01 | Gm26626       | 1,07 | No  |
| ENSMUSG00000097140 | -1,43E-02 | 0,399358379  | 3,26E-03 | 9,54E-01 | 1,00E+00 | Gm26779       | 0,99 | No  |
| ENSMUSG00000097141 | -1,17E-01 | 2,192121371  | 7,20E-01 | 3,96E-01 | 6,97E-01 | Gm10524       | 0,92 | No  |
| ENSMUSG00000097142 | 1,65E-01  | 8,053129206  | 8,08E+00 | 4,47E-03 | 5,12E-02 | Gm26778       | 1,12 | No  |
| ENSMUSG00000097145 | -1,78E-01 | 1,91263738   | 1,36E+00 | 2,44E-01 | 5,50E-01 | 9230114K14Rik | 0,88 | No  |

|                    |           |              |           |          |          |               |      |     |
|--------------------|-----------|--------------|-----------|----------|----------|---------------|------|-----|
| ENSMUSG00000097146 | -5,88E-02 | -3,033652696 | 1,62E-03  | 9,68E-01 | 1,00E+00 | Gm4211        | 0,96 | No  |
| ENSMUSG00000097147 | 2,79E-01  | -0,002454436 | 7,88E-01  | 3,75E-01 | 6,76E-01 | Gm26780       | 1,21 | No  |
| ENSMUSG00000097148 | 7,78E-02  | 4,77829745   | 1,03E+00  | 3,11E-01 | 6,11E-01 | Gm3839        | 1,06 | No  |
| ENSMUSG00000097149 | -3,44E-01 | 0,816874639  | 2,29E+00  | 1,30E-01 | 4,53E-01 | G630030J09Rik | 0,79 | No  |
| ENSMUSG00000097150 | -2,12E-01 | -1,711709279 | 1,16E-01  | 7,34E-01 | 9,23E-01 | Gm26513       | 0,86 | No  |
| ENSMUSG00000097151 | 1,78E-01  | 2,740076271  | 2,20E+00  | 1,38E-01 | 4,68E-01 | Gm26514       | 1,13 | No  |
| ENSMUSG00000097152 | -1,82E-01 | 0,673438594  | 5,56E-01  | 4,56E-01 | 7,45E-01 | Gm26515       | 0,88 | No  |
| ENSMUSG00000097154 | -2,55E-01 | 4,570210142  | 1,02E+01  | 1,38E-03 | 2,08E-02 | Gm26510       | 0,84 | Yes |
| ENSMUSG00000097155 | -6,89E-01 | -1,80090032  | 1,08E+00  | 2,98E-01 | 5,94E-01 | Gm26511       | 0,62 | No  |
| ENSMUSG00000097157 | -6,67E-01 | -2,033645134 | 6,81E-01  | 4,09E-01 | 7,06E-01 | Gm26512       | 0,63 | No  |
| ENSMUSG00000097158 | 2,30E-01  | -0,516578803 | 4,38E-01  | 5,08E-01 | 7,92E-01 | Gm26516       | 1,17 | No  |
| ENSMUSG00000097159 | 1,21E-01  | 1,721322727  | 5,32E-01  | 4,66E-01 | 7,54E-01 | Gm26517       | 1,09 | No  |
| ENSMUSG00000097160 | -3,76E-01 | 3,233758479  | 1,30E+01  | 3,04E-04 | 6,11E-03 | A630072L19Rik | 0,77 | Yes |
| ENSMUSG00000097162 | -3,89E-01 | 0,934915203  | 3,37E+00  | 6,63E-02 | 3,23E-01 | 2310010J17Rik | 0,76 | No  |
| ENSMUSG00000097163 | -3,41E-02 | -2,711710854 | 1,00E-03  | 9,75E-01 | 1,00E+00 | BC051077      | 0,98 | No  |
| ENSMUSG00000097164 | -2,59E-01 | 3,04427978   | 5,45E+00  | 1,96E-02 | 1,49E-01 | Cep83os       | 0,84 | No  |
| ENSMUSG00000097165 | 3,77E-01  | 0,111840332  | 1,90E+00  | 1,68E-01 | 5,23E-01 | 2210008F06Rik | 1,30 | No  |
| ENSMUSG00000097166 | -5,41E-01 | 0,20307469   | 3,92E+00  | 4,78E-02 | 2,62E-01 | 9330179D12Rik | 0,69 | No  |
| ENSMUSG00000097167 | 2,83E-01  | 1,359812958  | 2,27E+00  | 1,32E-01 | 4,56E-01 | Gm16740       | 1,22 | No  |
| ENSMUSG00000097168 | -7,98E-02 | 0,062315258  | 7,34E-02  | 7,87E-01 | 9,52E-01 | C230088H06Rik | 0,95 | No  |
| ENSMUSG00000097170 | 2,00E-01  | 2,9251613    | 2,94E+00  | 8,63E-02 | 3,78E-01 | Gm16982       | 1,15 | No  |
| ENSMUSG00000097171 | -1,89E+00 | -3,1076441   | 1,42E+00  | 2,33E-01 | 5,50E-01 | Gm17644       | 0,27 | No  |
| ENSMUSG00000097172 | -1,89E+00 | -3,1076441   | 1,42E+00  | 2,33E-01 | 5,50E-01 | 4930444M15Rik | 0,27 | No  |
| ENSMUSG00000097174 | -4,63E-01 | -0,185615955 | 2,21E+00  | 1,37E-01 | 4,66E-01 | Gm4890        | 0,73 | No  |
| ENSMUSG00000097175 | -1,89E+00 | -3,1076441   | 1,42E+00  | 2,33E-01 | 5,50E-01 | Gm27018       | 0,27 | No  |
| ENSMUSG00000097176 | 3,17E-01  | -2,497580759 | 1,02E-01  | 7,49E-01 | 9,31E-01 | Gm26830       | 1,25 | No  |
| ENSMUSG00000097177 | -4,08E-01 | 2,081709706  | 8,36E+00  | 3,83E-03 | 4,59E-02 | 9330159M07Rik | 0,75 | Yes |
| ENSMUSG00000097178 | -8,66E-01 | -2,896152469 | 4,12E-01  | 5,21E-01 | 8,00E-01 | 2310002F09Rik | 0,55 | No  |
| ENSMUSG00000097180 | -1,98E-01 | 1,879324906  | 1,65E+00  | 1,99E-01 | 5,50E-01 | 2700038G22Rik | 0,87 | No  |
| ENSMUSG00000097182 | 7,12E-01  | -2,83201991  | 2,76E-01  | 5,99E-01 | 8,46E-01 | A830009L08Rik | 1,64 | No  |
| ENSMUSG00000097183 | 3,14E-02  | -3,107617333 | -7,69E-10 | 1,00E+00 | 1,00E+00 | Gm17501       | 1,02 | No  |
| ENSMUSG00000097184 | 3,57E-01  | -1,205898898 | 6,20E-01  | 4,31E-01 | 7,25E-01 | 4632428C04Rik | 1,28 | No  |

|                    |           |              |           |          |          |               |      |     |
|--------------------|-----------|--------------|-----------|----------|----------|---------------|------|-----|
| ENSMUSG00000097185 | -5,46E-02 | 2,634688975  | 1,94E-01  | 6,59E-01 | 8,82E-01 | Gm26596       | 0,96 | No  |
| ENSMUSG00000097189 | -2,12E-01 | -1,96328515  | 9,91E-02  | 7,53E-01 | 9,33E-01 | Gm26594       | 0,86 | No  |
| ENSMUSG00000097191 | -3,41E-01 | -2,472923848 | 1,61E-01  | 6,88E-01 | 8,98E-01 | 5730422E09Rik | 0,79 | No  |
| ENSMUSG00000097193 | -4,40E-01 | -0,929145904 | 1,08E+00  | 2,99E-01 | 5,95E-01 | Gm26664       | 0,74 | No  |
| ENSMUSG00000097194 | -7,05E-01 | 1,972822555  | 2,24E+01  | 2,17E-06 | 8,74E-05 | 9330175E14Rik | 0,61 | Yes |
| ENSMUSG00000097195 | -4,41E-02 | 3,685999991  | 2,11E-01  | 6,46E-01 | 8,74E-01 | Snhg5         | 0,97 | No  |
| ENSMUSG00000097202 | 1,81E+00  | -3,10765737  | 1,28E+00  | 2,58E-01 | 5,50E-01 | Gm26701       | 3,49 | No  |
| ENSMUSG00000097203 | -8,32E-02 | -2,711654641 | 4,62E-03  | 9,46E-01 | 1,00E+00 | 4732419C18Rik | 0,94 | No  |
| ENSMUSG00000097204 | -3,50E-01 | -0,205718961 | 1,28E+00  | 2,58E-01 | 5,50E-01 | Gm17690       | 0,78 | No  |
| ENSMUSG00000097205 | 4,82E-01  | -2,456888484 | 2,83E-01  | 5,95E-01 | 8,43E-01 | Gm17540       | 1,40 | No  |
| ENSMUSG00000097206 | 8,68E-02  | 2,834346978  | 5,25E-01  | 4,69E-01 | 7,57E-01 | Gm26699       | 1,06 | No  |
| ENSMUSG00000097207 | 2,35E-01  | 2,048332164  | 2,48E+00  | 1,15E-01 | 4,19E-01 | 6030443J06Rik | 1,18 | No  |
| ENSMUSG00000097208 | -5,52E-01 | -2,448653878 | 2,39E-01  | 6,25E-01 | 8,59E-01 | Gm26698       | 0,68 | No  |
| ENSMUSG00000097211 | -3,62E-02 | 1,372162657  | 4,01E-02  | 8,41E-01 | 9,84E-01 | BC065403      | 0,98 | No  |
| ENSMUSG00000097213 | -1,46E-01 | -1,71168458  | 5,33E-02  | 8,17E-01 | 9,70E-01 | Gm26745       | 0,90 | No  |
| ENSMUSG00000097214 | -3,61E+00 | -2,83194649  | 5,86E+00  | 1,55E-02 | 1,29E-01 | Gm19791       | 0,08 | No  |
| ENSMUSG00000097216 | 5,91E-01  | 1,358591296  | 1,02E+01  | 1,41E-03 | 2,12E-02 | 4932441J04Rik | 1,51 | Yes |
| ENSMUSG00000097217 | 5,96E-01  | -1,175738651 | 1,66E+00  | 1,98E-01 | 5,50E-01 | Gm26549       | 1,51 | No  |
| ENSMUSG00000097219 | -2,98E-01 | -0,801240241 | 5,57E-01  | 4,56E-01 | 7,45E-01 | Gm26551       | 0,81 | No  |
| ENSMUSG00000097220 | 5,51E-01  | -3,033650525 | 1,20E-01  | 7,29E-01 | 9,20E-01 | Gm26599       | 1,46 | No  |
| ENSMUSG00000097221 | 9,62E-02  | 3,523855174  | 9,26E-01  | 3,36E-01 | 6,37E-01 | 1810049J17Rik | 1,07 | No  |
| ENSMUSG00000097223 | -2,36E-01 | -1,378354229 | 2,27E-01  | 6,34E-01 | 8,66E-01 | Gm2449        | 0,85 | No  |
| ENSMUSG00000097224 | 1,84E-01  | 5,417971899  | 6,87E+00  | 8,74E-03 | 8,46E-02 | Gm26716       | 1,14 | No  |
| ENSMUSG00000097226 | -1,89E+00 | -3,1076441   | 1,42E+00  | 2,33E-01 | 5,50E-01 | Gm26600       | 0,27 | No  |
| ENSMUSG00000097230 | -1,30E-01 | 0,330925465  | 2,54E-01  | 6,14E-01 | 8,53E-01 | Gm26853       | 0,91 | No  |
| ENSMUSG00000097231 | 2,57E-01  | 1,846604123  | 2,58E+00  | 1,08E-01 | 4,04E-01 | Gm26852       | 1,19 | No  |
| ENSMUSG00000097232 | 9,01E-03  | -3,107646452 | -5,16E-10 | 1,00E+00 | 1,00E+00 | Gm26854       | 1,01 | No  |
| ENSMUSG00000097233 | -4,63E-01 | 0,913084332  | 4,72E+00  | 2,99E-02 | 1,98E-01 | Gm17552       | 0,73 | No  |
| ENSMUSG00000097234 | -8,59E-02 | 4,122244168  | 9,87E-01  | 3,20E-01 | 6,21E-01 | Gm26518       | 0,94 | No  |
| ENSMUSG00000097235 | -2,49E-02 | -3,146121042 | -4,44E-11 | 1,00E+00 | 1,00E+00 | Gm17250       | 0,98 | No  |
| ENSMUSG00000097236 | -1,15E+00 | -1,929235706 | 3,04E+00  | 8,13E-02 | 3,66E-01 | 4831440E17Rik | 0,45 | No  |
| ENSMUSG00000097237 | -1,89E+00 | -3,1076441   | 1,42E+00  | 2,33E-01 | 5,50E-01 | Gm26519       | 0,27 | No  |

|                    |           |              |           |          |          |               |      |     |
|--------------------|-----------|--------------|-----------|----------|----------|---------------|------|-----|
| ENSMUSG00000097239 | 2,38E-02  | 2,993270405  | 4,61E-02  | 8,30E-01 | 9,77E-01 | Gm27029       | 1,02 | No  |
| ENSMUSG00000097240 | -1,89E+00 | -3,033648118 | 1,42E+00  | 2,33E-01 | 5,50E-01 | Gm26614       | 0,27 | No  |
| ENSMUSG00000097242 | 2,84E-01  | 3,820170623  | 9,07E+00  | 2,60E-03 | 3,44E-02 | Gm16907       | 1,22 | Yes |
| ENSMUSG00000097243 | 9,22E-02  | -1,107656487 | 3,77E-02  | 8,46E-01 | 9,87E-01 | Gm26908       | 1,07 | No  |
| ENSMUSG00000097244 | -5,72E-01 | -2,832008118 | 2,57E-01  | 6,12E-01 | 8,52E-01 | Gm7928        | 0,67 | No  |
| ENSMUSG00000097245 | -3,53E-02 | 7,210656952  | 3,45E-01  | 5,57E-01 | 8,21E-01 | Gm5421        | 0,98 | No  |
| ENSMUSG00000097246 | -6,21E-01 | 0,045609875  | 4,50E+00  | 3,38E-02 | 2,16E-01 | Gm26890       | 0,65 | No  |
| ENSMUSG00000097247 | -3,21E-01 | -2,165711932 | 1,42E-01  | 7,06E-01 | 9,08E-01 | 1500012K07Rik | 0,80 | No  |
| ENSMUSG00000097248 | 8,90E-01  | -1,912750754 | 1,88E+00  | 1,70E-01 | 5,26E-01 | Gm2694        | 1,85 | No  |
| ENSMUSG00000097249 | 1,78E+00  | -2,600696313 | 2,28E+00  | 1,31E-01 | 4,55E-01 | Gm26889       | 3,44 | No  |
| ENSMUSG00000097250 | -8,63E-01 | -2,740843571 | 4,07E-01  | 5,23E-01 | 8,01E-01 | Gm26771       | 0,55 | No  |
| ENSMUSG00000097251 | 6,06E-01  | -0,719076597 | 2,47E+00  | 1,16E-01 | 4,21E-01 | 5033417F24Rik | 1,52 | No  |
| ENSMUSG00000097252 | 1,89E+00  | -2,655201039 | 2,65E+00  | 1,04E-01 | 3,95E-01 | Gm6634        | 3,70 | No  |
| ENSMUSG00000097253 | 1,31E-01  | 1,4158789    | 5,13E-01  | 4,74E-01 | 7,62E-01 | Gm26770       | 1,09 | No  |
| ENSMUSG00000097254 | -6,63E-01 | 0,095904108  | 5,45E+00  | 1,95E-02 | 1,49E-01 | C430042M11Rik | 0,63 | No  |
| ENSMUSG00000097255 | -1,33E+00 | -2,896104821 | 1,11E+00  | 2,92E-01 | 5,88E-01 | Rpl31-ps7     | 0,40 | No  |
| ENSMUSG00000097257 | -3,22E-01 | 0,989050397  | 2,30E+00  | 1,29E-01 | 4,52E-01 | Gm26768       | 0,80 | No  |
| ENSMUSG00000097258 | 5,64E-01  | 0,586841237  | 5,61E+00  | 1,79E-02 | 1,40E-01 | Gm26767       | 1,48 | No  |
| ENSMUSG00000097259 | 1,85E+00  | -3,107657832 | 1,35E+00  | 2,46E-01 | 5,50E-01 | Gm26766       | 3,61 | No  |
| ENSMUSG00000097261 | -6,09E-01 | -2,401400885 | 5,05E-01  | 4,77E-01 | 7,65E-01 | 4930532G15Rik | 0,66 | No  |
| ENSMUSG00000097262 | -3,27E-01 | 2,90363011   | 7,66E+00  | 5,64E-03 | 6,11E-02 | 4933416M07Rik | 0,80 | No  |
| ENSMUSG00000097263 | -2,40E-01 | -0,641287894 | 3,70E-01  | 5,43E-01 | 8,12E-01 | Gm26804       | 0,85 | No  |
| ENSMUSG00000097264 | -8,40E-01 | -2,896150159 | 3,87E-01  | 5,34E-01 | 8,07E-01 | Rpl31-ps24    | 0,56 | No  |
| ENSMUSG00000097265 | 9,01E-03  | -3,107646452 | -5,16E-10 | 1,00E+00 | 1,00E+00 | Gm26803       | 1,01 | No  |
| ENSMUSG00000097266 | 1,84E+00  | -2,711725935 | 1,33E+00  | 2,49E-01 | 5,50E-01 | Gm26802       | 3,57 | No  |
| ENSMUSG00000097267 | -4,56E-01 | -1,355556439 | 9,90E-01  | 3,20E-01 | 6,20E-01 | 1700109K24Rik | 0,73 | No  |
| ENSMUSG00000097268 | 2,27E+00  | -3,070181583 | 1,97E+00  | 1,60E-01 | 5,09E-01 | Gm26805       | 4,82 | No  |
| ENSMUSG00000097271 | -4,10E-01 | -2,185625021 | 3,50E-01  | 5,54E-01 | 8,20E-01 | Gm9903        | 0,75 | No  |
| ENSMUSG00000097272 | -1,70E-01 | 4,341022038  | 3,91E+00  | 4,81E-02 | 2,63E-01 | Gm26649       | 0,89 | No  |
| ENSMUSG00000097274 | -3,68E-01 | -0,088698501 | 1,57E+00  | 2,10E-01 | 5,50E-01 | Gm26564       | 0,77 | No  |
| ENSMUSG00000097275 | -2,14E-01 | 4,888502833  | 8,14E+00  | 4,32E-03 | 5,01E-02 | Gm26648       | 0,86 | No  |
| ENSMUSG00000097276 | 3,33E-01  | -1,311240036 | 4,74E-01  | 4,91E-01 | 7,77E-01 | 4930525G20Rik | 1,26 | No  |

|                    |           |              |           |          |          |               |      |     |
|--------------------|-----------|--------------|-----------|----------|----------|---------------|------|-----|
| ENSMUSG00000097277 | -1,93E-01 | 1,546265244  | 1,23E+00  | 2,68E-01 | 5,64E-01 | 2900076A07Rik | 0,87 | No  |
| ENSMUSG00000097279 | -5,48E-01 | -0,66895861  | 2,27E+00  | 1,32E-01 | 4,57E-01 | Gm5106        | 0,68 | No  |
| ENSMUSG00000097280 | 9,01E-03  | -3,107646452 | -5,16E-10 | 1,00E+00 | 1,00E+00 | AI849053      | 1,01 | No  |
| ENSMUSG00000097282 | 2,15E-01  | -2,448711746 | 5,82E-02  | 8,09E-01 | 9,65E-01 | 5031415H12Rik | 1,16 | No  |
| ENSMUSG00000097283 | -1,21E+00 | -2,497526092 | 1,89E+00  | 1,69E-01 | 5,24E-01 | Gm26686       | 0,43 | No  |
| ENSMUSG00000097284 | 1,79E-02  | -0,378267597 | 2,54E-03  | 9,60E-01 | 1,00E+00 | 4930480K23Rik | 1,01 | No  |
| ENSMUSG00000097285 | -3,56E-03 | 0,158929452  | 1,55E-04  | 9,90E-01 | 1,00E+00 | Gm26683       | 1,00 | No  |
| ENSMUSG00000097287 | -6,11E-03 | 1,229626287  | 1,07E-03  | 9,74E-01 | 1,00E+00 | D130017N08Rik | 1,00 | No  |
| ENSMUSG00000097290 | -7,74E-02 | 2,264998228  | 3,14E-01  | 5,75E-01 | 8,34E-01 | 1300002E11Rik | 0,95 | No  |
| ENSMUSG00000097291 | -1,89E+00 | -3,1076441   | 1,42E+00  | 2,33E-01 | 5,50E-01 | Gm18828       | 0,27 | No  |
| ENSMUSG00000097292 | -1,33E+00 | -2,770572179 | 1,11E+00  | 2,92E-01 | 5,87E-01 | A230107N01Rik | 0,40 | No  |
| ENSMUSG00000097294 | 5,69E-01  | 1,131687481  | 7,40E+00  | 6,52E-03 | 6,81E-02 | Gm26888       | 1,48 | No  |
| ENSMUSG00000097295 | 1,09E-01  | -0,024580459 | 1,37E-01  | 7,11E-01 | 9,11E-01 | Hmgb1-ps8     | 1,08 | No  |
| ENSMUSG00000097296 | 4,60E-01  | 2,520369573  | 1,32E+01  | 2,86E-04 | 5,82E-03 | Gm26532       | 1,38 | Yes |
| ENSMUSG00000097300 | -7,43E-01 | -2,574160687 | 4,59E-01  | 4,98E-01 | 7,83E-01 | Gm26835       | 0,60 | No  |
| ENSMUSG00000097301 | 3,79E-01  | 0,892268358  | 3,10E+00  | 7,84E-02 | 3,58E-01 | AW121686      | 1,30 | No  |
| ENSMUSG00000097303 | -2,67E+00 | -2,497598153 | 6,57E+00  | 1,04E-02 | 9,60E-02 | 3110083C13Rik | 0,16 | No  |
| ENSMUSG00000097304 | 4,92E-01  | -1,47292549  | 7,49E-01  | 3,87E-01 | 6,87E-01 | Rpl31-ps15    | 1,41 | No  |
| ENSMUSG00000097305 | -2,15E+00 | -2,574188363 | 3,62E+00  | 5,71E-02 | 2,94E-01 | Gm17276       | 0,23 | No  |
| ENSMUSG00000097308 | -1,94E+00 | -2,146019942 | 6,21E+00  | 1,27E-02 | 1,11E-01 | Gm6410        | 0,26 | No  |
| ENSMUSG00000097309 | -3,67E-01 | -0,2159177   | 1,26E+00  | 2,62E-01 | 5,56E-01 | Gm17249       | 0,78 | No  |
| ENSMUSG00000097310 | 1,90E+00  | -2,185713485 | 4,40E+00  | 3,60E-02 | 2,25E-01 | A930038B10Rik | 3,74 | No  |
| ENSMUSG00000097312 | -8,82E-02 | -0,711664352 | 5,49E-02  | 8,15E-01 | 9,68E-01 | Gm26870       | 0,94 | No  |
| ENSMUSG00000097313 | -2,06E-01 | -1,10768007  | 2,08E-01  | 6,48E-01 | 8,75E-01 | Gm26569       | 0,87 | No  |
| ENSMUSG00000097316 | 3,46E-02  | 0,665560774  | 2,35E-02  | 8,78E-01 | 1,00E+00 | Gm10516       | 1,02 | No  |
| ENSMUSG00000097317 | 4,33E-01  | -2,711715187 | 1,46E-01  | 7,02E-01 | 9,05E-01 | Gm17281       | 1,35 | No  |
| ENSMUSG00000097318 | 5,29E-02  | -0,156013795 | 3,09E-02  | 8,60E-01 | 9,95E-01 | 1700007L15Rik | 1,04 | No  |
| ENSMUSG00000097320 | -1,91E-02 | 0,48662853   | 6,75E-03  | 9,35E-01 | 1,00E+00 | Tmem147os     | 0,99 | No  |
| ENSMUSG00000097321 | -2,94E-01 | -1,018547622 | 4,13E-01  | 5,21E-01 | 7,99E-01 | 1700028E10Rik | 0,82 | No  |
| ENSMUSG00000097322 | 3,20E-01  | -0,561346904 | 8,42E-01  | 3,59E-01 | 6,60E-01 | A530083I20Rik | 1,25 | No  |
| ENSMUSG00000097323 | -1,88E+00 | -2,963233427 | 1,42E+00  | 2,33E-01 | 5,50E-01 | 4930426I24Rik | 0,27 | No  |
| ENSMUSG00000097325 | -3,12E-01 | 0,502194233  | 1,70E+00  | 1,92E-01 | 5,50E-01 | Gm16897       | 0,81 | No  |

|                    |           |              |           |          |          |               |      |     |
|--------------------|-----------|--------------|-----------|----------|----------|---------------|------|-----|
| ENSMUSG00000097327 | -1,93E-01 | -0,215970748 | 3,17E-01  | 5,73E-01 | 8,33E-01 | E030030I06Rik | 0,87 | No  |
| ENSMUSG00000097328 | 2,43E-01  | 6,105666382  | 1,39E+01  | 1,89E-04 | 4,16E-03 | Tnfsf12       | 1,18 | Yes |
| ENSMUSG00000097329 | -9,85E-02 | -2,627655372 | 8,87E-03  | 9,25E-01 | 1,00E+00 | 4931403G20Rik | 0,93 | No  |
| ENSMUSG00000097330 | -8,91E-01 | -2,832006827 | 5,63E-01  | 4,53E-01 | 7,43E-01 | Gm26672       | 0,54 | No  |
| ENSMUSG00000097331 | -9,22E-02 | 2,802168569  | 5,94E-01  | 4,41E-01 | 7,33E-01 | F420014N23Rik | 0,94 | No  |
| ENSMUSG00000097333 | -1,00E-01 | 2,491118982  | 6,04E-01  | 4,37E-01 | 7,30E-01 | Zfp87         | 0,93 | No  |
| ENSMUSG00000097334 | -1,53E-01 | -1,042652634 | 1,29E-01  | 7,19E-01 | 9,15E-01 | 2700012I20Rik | 0,90 | No  |
| ENSMUSG00000097335 | -2,49E-01 | 1,819297352  | 2,48E+00  | 1,16E-01 | 4,21E-01 | Gm26563       | 0,84 | No  |
| ENSMUSG00000097336 | 9,01E-03  | -3,107646452 | -5,16E-10 | 1,00E+00 | 1,00E+00 | Fendr         | 1,01 | No  |
| ENSMUSG00000097337 | 5,45E-01  | 0,15454816   | 4,19E+00  | 4,08E-02 | 2,39E-01 | Gm26606       | 1,46 | No  |
| ENSMUSG00000097343 | -1,72E-01 | -0,221250575 | 3,18E-01  | 5,73E-01 | 8,32E-01 | 9030407P20Rik | 0,89 | No  |
| ENSMUSG00000097345 | -6,43E-01 | -1,99793183  | 8,74E-01  | 3,50E-01 | 6,51E-01 | AA543186      | 0,64 | No  |
| ENSMUSG00000097346 | -2,28E-01 | 6,277234392  | 1,28E+01  | 3,51E-04 | 6,88E-03 | Gm26619       | 0,85 | Yes |
| ENSMUSG00000097347 | 1,17E-01  | 6,334456929  | 3,39E+00  | 6,55E-02 | 3,21E-01 | Gm17275       | 1,08 | No  |
| ENSMUSG00000097350 | 9,70E-01  | -0,641410222 | 6,67E+00  | 9,79E-03 | 9,19E-02 | 4732491K20Rik | 1,96 | No  |
| ENSMUSG00000097352 | 2,86E-02  | 4,686795732  | 1,33E-01  | 7,15E-01 | 9,13E-01 | C920009B18Rik | 1,02 | No  |
| ENSMUSG00000097353 | -4,24E-01 | 1,379263507  | 5,16E+00  | 2,32E-02 | 1,67E-01 | A430046D13Rik | 0,75 | No  |
| ENSMUSG00000097354 | 9,37E-02  | 3,242258921  | 7,87E-01  | 3,75E-01 | 6,76E-01 | 2310001H17Rik | 1,07 | No  |
| ENSMUSG00000097357 | -1,13E-02 | 1,815692345  | 5,01E-03  | 9,44E-01 | 1,00E+00 | Gm16793       | 0,99 | No  |
| ENSMUSG00000097358 | 4,13E-01  | 0,816927511  | 3,53E+00  | 6,01E-02 | 3,03E-01 | Gm26773       | 1,33 | No  |
| ENSMUSG00000097360 | 4,87E-01  | -2,01573244  | 5,27E-01  | 4,68E-01 | 7,56E-01 | 9430065F17Rik | 1,40 | No  |
| ENSMUSG00000097362 | -2,69E+00 | -2,963260181 | 2,87E+00  | 9,01E-02 | 3,80E-01 | Gm26544       | 0,16 | No  |
| ENSMUSG00000097363 | -1,93E+00 | -2,963244023 | 1,47E+00  | 2,25E-01 | 5,50E-01 | Gm26717       | 0,26 | No  |
| ENSMUSG00000097364 | 6,48E-02  | -1,060888692 | 2,11E-02  | 8,85E-01 | 1,00E+00 | Gm26719       | 1,05 | No  |
| ENSMUSG00000097365 | -2,48E-02 | 2,693186011  | 4,11E-02  | 8,39E-01 | 9,83E-01 | C030034L19Rik | 0,98 | No  |
| ENSMUSG00000097366 | 3,56E-03  | 1,688840492  | 4,77E-04  | 9,83E-01 | 1,00E+00 | Gm8177        | 1,00 | No  |
| ENSMUSG00000097367 | 1,31E-02  | 3,833344483  | 2,05E-02  | 8,86E-01 | 1,00E+00 | Gm26718       | 1,01 | No  |
| ENSMUSG00000097368 | 4,97E-01  | 1,019229189  | 5,39E+00  | 2,02E-02 | 1,52E-01 | Gm10390       | 1,41 | No  |
| ENSMUSG00000097369 | 4,29E-02  | -1,497531376 | 5,78E-03  | 9,39E-01 | 1,00E+00 | Gm26545       | 1,03 | No  |
| ENSMUSG00000097370 | -6,30E-02 | -2,770619422 | 3,15E-03  | 9,55E-01 | 1,00E+00 | 4930467K11Rik | 0,96 | No  |
| ENSMUSG00000097371 | -8,12E-01 | -2,896138345 | 3,61E-01  | 5,48E-01 | 8,15E-01 | Gm26875       | 0,57 | No  |
| ENSMUSG00000097372 | -4,30E-01 | -1,289526882 | 8,80E-01  | 3,48E-01 | 6,49E-01 | Gm26876       | 0,74 | No  |



|                    |           |              |           |          |          |               |      |     |
|--------------------|-----------|--------------|-----------|----------|----------|---------------|------|-----|
| ENSMUSG00000097373 | -7,83E-01 | -1,929291332 | 1,25E+00  | 2,64E-01 | 5,59E-01 | Gm26877       | 0,58 | No  |
| ENSMUSG00000097374 | 1,64E+00  | -2,832049059 | 1,85E+00  | 1,74E-01 | 5,32E-01 | Gm26874       | 3,11 | No  |
| ENSMUSG00000097375 | 5,48E-01  | 1,013560499  | 7,34E+00  | 6,74E-03 | 6,99E-02 | 6720427I07Rik | 1,46 | No  |
| ENSMUSG00000097376 | 3,14E-02  | -3,107617333 | -7,69E-10 | 1,00E+00 | 1,00E+00 | Gm8705        | 1,02 | No  |
| ENSMUSG00000097377 | 8,12E-01  | -2,711711941 | 5,74E-01  | 4,49E-01 | 7,39E-01 | Gm10822       | 1,76 | No  |
| ENSMUSG00000097378 | -3,54E+00 | -2,770589624 | 5,64E+00  | 1,75E-02 | 1,38E-01 | B230208H11Rik | 0,09 | No  |
| ENSMUSG00000097379 | -1,68E-01 | 2,139795752  | 1,35E+00  | 2,46E-01 | 5,50E-01 | Gm26873       | 0,89 | No  |
| ENSMUSG00000097380 | 3,42E-01  | 1,490970468  | 3,82E+00  | 5,06E-02 | 2,73E-01 | Gm26816       | 1,27 | No  |
| ENSMUSG00000097381 | -7,26E-02 | 3,460614232  | 5,18E-01  | 4,72E-01 | 7,60E-01 | A230087F16Rik | 0,95 | No  |
| ENSMUSG00000097383 | -1,20E+00 | -2,548208483 | 1,87E+00  | 1,71E-01 | 5,27E-01 | 1500026H17Rik | 0,43 | No  |
| ENSMUSG00000097386 | 1,12E-01  | -2,574195118 | 1,21E-02  | 9,12E-01 | 1,00E+00 | 9130213A22Rik | 1,08 | No  |
| ENSMUSG00000097387 | -4,04E-01 | -2,6006522   | 1,66E-01  | 6,84E-01 | 8,96E-01 | 4930563E18Rik | 0,76 | No  |
| ENSMUSG00000097388 | -1,01E-01 | 1,769029089  | 4,03E-01  | 5,26E-01 | 8,03E-01 | Gm3200        | 0,93 | No  |
| ENSMUSG00000097390 | -2,31E-01 | -1,126763676 | 2,25E-01  | 6,35E-01 | 8,67E-01 | Gm26785       | 0,85 | No  |
| ENSMUSG00000097392 | 1,85E-01  | 2,334878157  | 1,80E+00  | 1,79E-01 | 5,40E-01 | D930016D06Rik | 1,14 | No  |
| ENSMUSG00000097393 | -3,83E-02 | -3,107651936 | -7,91E-11 | 1,00E+00 | 1,00E+00 | D030068K23Rik | 0,97 | No  |
| ENSMUSG00000097397 | -3,13E-02 | 2,783917877  | 6,95E-02  | 7,92E-01 | 9,55E-01 | Gm16861       | 0,98 | No  |
| ENSMUSG00000097399 | -7,07E-01 | -2,929325925 | 2,00E-01  | 6,55E-01 | 8,79E-01 | Gm26555       | 0,61 | No  |
| ENSMUSG00000097401 | 1,81E+00  | -3,10765737  | 1,28E+00  | 2,58E-01 | 5,50E-01 | Gm26744       | 3,49 | No  |
| ENSMUSG00000097402 | -2,34E-01 | -1,99800973  | 1,08E-01  | 7,42E-01 | 9,27E-01 | Gm17399       | 0,85 | No  |
| ENSMUSG00000097403 | -2,41E-01 | -0,002567247 | 6,46E-01  | 4,22E-01 | 7,17E-01 | 9230116N13Rik | 0,85 | No  |
| ENSMUSG00000097404 | -1,53E-02 | 3,240037593  | 2,10E-02  | 8,85E-01 | 1,00E+00 | Gm10814       | 0,99 | No  |
| ENSMUSG00000097405 | 1,25E-01  | 3,36933377   | 1,51E+00  | 2,19E-01 | 5,50E-01 | D630044L22Rik | 1,09 | No  |
| ENSMUSG00000097407 | -3,13E-01 | 0,702820994  | 1,88E+00  | 1,70E-01 | 5,26E-01 | 4933408J17Rik | 0,80 | No  |
| ENSMUSG00000097410 | -1,02E-01 | 0,913651871  | 2,26E-01  | 6,34E-01 | 8,66E-01 | Gm26668       | 0,93 | No  |
| ENSMUSG00000097411 | -1,38E-01 | 2,044952966  | 8,74E-01  | 3,50E-01 | 6,51E-01 | B430218F22Rik | 0,91 | No  |
| ENSMUSG00000097412 | 1,10E-01  | 6,788207876  | 3,18E+00  | 7,44E-02 | 3,47E-01 | 1810014B01Rik | 1,08 | No  |
| ENSMUSG00000097413 | -5,73E-02 | -2,655098932 | 2,23E-03  | 9,62E-01 | 1,00E+00 | A830052D11Rik | 0,96 | No  |
| ENSMUSG00000097414 | -6,28E-03 | 4,362622633  | 5,70E-03  | 9,40E-01 | 1,00E+00 | B130046B21Rik | 1,00 | No  |
| ENSMUSG00000097415 | 8,18E-02  | 7,228706322  | 1,87E+00  | 1,72E-01 | 5,28E-01 | AU020206      | 1,06 | No  |
| ENSMUSG00000097416 | 4,00E-01  | -1,289550303 | 7,21E-01  | 3,96E-01 | 6,96E-01 | Gm26670       | 1,32 | No  |
| ENSMUSG00000097417 | -2,74E-01 | 6,494625481  | 1,93E+01  | 1,14E-05 | 3,77E-04 | Gm26669       | 0,83 | Yes |

|                    |           |              |           |          |          |               |      |     |
|--------------------|-----------|--------------|-----------|----------|----------|---------------|------|-----|
| ENSMUSG00000097418 | -1,02E+00 | 4,487995636  | 1,64E+02  | 1,77E-37 | 1,77E-34 | Mir155hg      | 0,49 | Yes |
| ENSMUSG00000097422 | 1,69E+00  | -1,832099168 | 5,56E+00  | 1,84E-02 | 1,43E-01 | Gm26521       | 3,24 | No  |
| ENSMUSG00000097423 | 2,78E-01  | 3,601024017  | 8,20E+00  | 4,20E-03 | 4,90E-02 | Gm26522       | 1,21 | Yes |
| ENSMUSG00000097424 | 2,00E-02  | -3,070159489 | 2,20E-11  | 1,00E+00 | 1,00E+00 | 1700030M09Rik | 1,01 | No  |
| ENSMUSG00000097426 | -5,68E-01 | -2,14603222  | 7,05E-01  | 4,01E-01 | 6,99E-01 | Gm8941        | 0,67 | No  |
| ENSMUSG00000097428 | 5,75E-01  | -3,070183787 | 1,30E-01  | 7,19E-01 | 9,15E-01 | AW047730      | 1,49 | No  |
| ENSMUSG00000097429 | 2,29E-01  | -0,896189974 | 2,99E-01  | 5,85E-01 | 8,38E-01 | Gm26520       | 1,17 | No  |
| ENSMUSG00000097431 | -1,69E-01 | 3,286580739  | 2,64E+00  | 1,04E-01 | 3,97E-01 | Gm26782       | 0,89 | No  |
| ENSMUSG00000097433 | -1,84E-02 | 0,225349976  | 4,96E-03  | 9,44E-01 | 1,00E+00 | Gm26781       | 0,99 | No  |
| ENSMUSG00000097434 | -1,87E+00 | -3,107637761 | 1,39E+00  | 2,38E-01 | 5,50E-01 | Gm16630       | 0,27 | No  |
| ENSMUSG00000097439 | 8,22E-02  | 3,206509984  | 5,96E-01  | 4,40E-01 | 7,32E-01 | Gm16754       | 1,06 | No  |
| ENSMUSG00000097440 | 2,27E-02  | 0,75223998   | 9,81E-03  | 9,21E-01 | 1,00E+00 | Gm6277        | 1,02 | No  |
| ENSMUSG00000097441 | -3,83E-02 | -3,107651936 | -7,91E-11 | 1,00E+00 | 1,00E+00 | Gm26633       | 0,97 | No  |
| ENSMUSG00000097442 | 1,87E+00  | -3,03364371  | 1,36E+00  | 2,43E-01 | 5,50E-01 | Gm26632       | 3,66 | No  |
| ENSMUSG00000097443 | -5,62E-01 | -1,509895333 | 1,00E+00  | 3,17E-01 | 6,17E-01 | Gm17529       | 0,68 | No  |
| ENSMUSG00000097445 | -1,09E-01 | 4,46155827   | 1,82E+00  | 1,77E-01 | 5,36E-01 | Gm26631       | 0,93 | No  |
| ENSMUSG00000097448 | 1,87E+00  | -3,107639691 | 1,38E+00  | 2,40E-01 | 5,50E-01 | Platr22       | 3,67 | No  |
| ENSMUSG00000097454 | -8,26E-01 | -2,522638487 | 6,82E-01  | 4,09E-01 | 7,05E-01 | Gm26892       | 0,56 | No  |
| ENSMUSG00000097455 | 3,79E-01  | -1,998041646 | 3,05E-01  | 5,81E-01 | 8,37E-01 | Gm26891       | 1,30 | No  |
| ENSMUSG00000097457 | -4,84E-02 | 2,351215781  | 1,29E-01  | 7,19E-01 | 9,15E-01 | 2310031A07Rik | 0,97 | No  |
| ENSMUSG00000097458 | 2,06E-02  | -3,146103739 | -9,26E-10 | 1,00E+00 | 1,00E+00 | Gm26697       | 1,01 | No  |
| ENSMUSG00000097459 | 9,01E-03  | -3,107646452 | -5,16E-10 | 1,00E+00 | 1,00E+00 | Gm26895       | 1,01 | No  |
| ENSMUSG00000097460 | 1,24E+00  | -2,574257758 | 1,52E+00  | 2,18E-01 | 5,50E-01 | Gm26734       | 2,36 | No  |
| ENSMUSG00000097461 | -4,13E-01 | 2,037020679  | 8,01E+00  | 4,65E-03 | 5,29E-02 | Gm26735       | 0,75 | No  |
| ENSMUSG00000097463 | 1,58E+00  | -2,548230689 | 2,72E+00  | 9,89E-02 | 3,91E-01 | 4930448E22Rik | 2,99 | No  |
| ENSMUSG00000097465 | -1,89E+00 | -3,1076441   | 1,42E+00  | 2,33E-01 | 5,50E-01 | Gm16619       | 0,27 | No  |
| ENSMUSG00000097467 | 1,06E-01  | 1,727610199  | 4,19E-01  | 5,18E-01 | 7,98E-01 | Gm26737       | 1,08 | No  |
| ENSMUSG00000097469 | 1,91E-02  | 1,257303783  | 1,02E-02  | 9,19E-01 | 1,00E+00 | Gm26733       | 1,01 | No  |
| ENSMUSG00000097470 | -5,30E-01 | -1,116998034 | 1,50E+00  | 2,21E-01 | 5,50E-01 | Gm26587       | 0,69 | No  |
| ENSMUSG00000097471 | 4,13E-01  | 4,042670174  | 2,15E+01  | 3,57E-06 | 1,36E-04 | 5830432E09Rik | 1,33 | Yes |
| ENSMUSG00000097472 | -1,31E-01 | 3,120077773  | 1,41E+00  | 2,36E-01 | 5,50E-01 | Gm26586       | 0,91 | No  |
| ENSMUSG00000097474 | 3,93E-01  | 2,402995037  | 8,26E+00  | 4,05E-03 | 4,78E-02 | Gm26584       | 1,31 | Yes |

|                    |           |              |           |          |          |               |      |     |
|--------------------|-----------|--------------|-----------|----------|----------|---------------|------|-----|
| ENSMUSG00000097476 | 5,67E-01  | -1,929335661 | 5,44E-01  | 4,61E-01 | 7,49E-01 | Gm26583       | 1,48 | No  |
| ENSMUSG00000097479 | 1,09E-01  | 5,949831903  | 2,73E+00  | 9,85E-02 | 3,91E-01 | Gm26582       | 1,08 | No  |
| ENSMUSG00000097482 | -6,14E-01 | -1,6689344   | 1,22E+00  | 2,70E-01 | 5,67E-01 | Gm17634       | 0,65 | No  |
| ENSMUSG00000097486 | -3,83E-02 | -3,107651936 | -7,91E-11 | 1,00E+00 | 1,00E+00 | Gm17733       | 0,97 | No  |
| ENSMUSG00000097487 | -2,86E-02 | 2,115887586  | 3,68E-02  | 8,48E-01 | 9,88E-01 | Ptges3l       | 0,98 | No  |
| ENSMUSG00000097488 | -8,28E-03 | 3,393151663  | 6,63E-03  | 9,35E-01 | 1,00E+00 | 4732487G21Rik | 0,99 | No  |
| ENSMUSG00000097491 | -1,13E+00 | -2,832001332 | 7,55E-01  | 3,85E-01 | 6,86E-01 | Gm2366        | 0,46 | No  |
| ENSMUSG00000097493 | -3,83E-01 | 3,253791266  | 1,31E+01  | 2,95E-04 | 5,97E-03 | 9930014A18Rik | 0,77 | Yes |
| ENSMUSG00000097494 | 9,98E-02  | -1,929363577 | 2,19E-02  | 8,82E-01 | 1,00E+00 | 4933406C10Rik | 1,07 | No  |
| ENSMUSG00000097500 | -2,71E+00 | -2,963182239 | 2,92E+00  | 8,75E-02 | 3,78E-01 | Gm26537       | 0,15 | No  |
| ENSMUSG00000097501 | 1,42E-01  | 2,273393908  | 1,01E+00  | 3,15E-01 | 6,16E-01 | Gm26536       | 1,10 | No  |
| ENSMUSG00000097502 | -1,14E-02 | -3,033635021 | 1,50E-05  | 9,97E-01 | 1,00E+00 | 4930528D03Rik | 0,99 | No  |
| ENSMUSG00000097503 | 3,07E-01  | -0,740902363 | 6,00E-01  | 4,39E-01 | 7,31E-01 | 3110045C21Rik | 1,24 | No  |
| ENSMUSG00000097504 | 1,90E-01  | -0,389880602 | 3,20E-01  | 5,72E-01 | 8,32E-01 | 4930516B21Rik | 1,14 | No  |
| ENSMUSG00000097505 | -1,90E+00 | -3,033620709 | 1,44E+00  | 2,30E-01 | 5,50E-01 | Gm26540       | 0,27 | No  |
| ENSMUSG00000097507 | -3,84E-01 | 0,943927586  | 3,24E+00  | 7,19E-02 | 3,40E-01 | Gm26538       | 0,77 | No  |
| ENSMUSG00000097509 | 6,23E-02  | 1,155588661  | 9,72E-02  | 7,55E-01 | 9,34E-01 | B230322F03Rik | 1,04 | No  |
| ENSMUSG00000097514 | 3,82E-01  | -2,146160247 | 2,33E-01  | 6,29E-01 | 8,62E-01 | Gm17619       | 1,30 | No  |
| ENSMUSG00000097515 | -1,87E+00 | -3,107637761 | 1,39E+00  | 2,38E-01 | 5,50E-01 | 1700040D17Rik | 0,27 | No  |
| ENSMUSG00000097517 | -5,20E-02 | 1,164048233  | 6,82E-02  | 7,94E-01 | 9,56E-01 | Gm26695       | 0,96 | No  |
| ENSMUSG00000097518 | 2,13E-01  | 2,571742214  | 2,72E+00  | 9,89E-02 | 3,91E-01 | Gm26694       | 1,16 | No  |
| ENSMUSG00000097519 | 3,32E-01  | -0,084257646 | 1,07E+00  | 3,02E-01 | 5,98E-01 | 4930558J18Rik | 1,26 | No  |
| ENSMUSG00000097523 | -2,07E-01 | -0,68314859  | 2,79E-01  | 5,98E-01 | 8,45E-01 | 1700022N22Rik | 0,87 | No  |
| ENSMUSG00000097525 | -3,42E-01 | -1,268229384 | 5,37E-01  | 4,64E-01 | 7,52E-01 | Platr31       | 0,79 | No  |
| ENSMUSG00000097526 | -4,79E-01 | -0,32212984  | 1,86E+00  | 1,72E-01 | 5,29E-01 | Gm26847       | 0,72 | No  |
| ENSMUSG00000097527 | -3,26E-02 | -2,655036167 | 7,74E-04  | 9,78E-01 | 1,00E+00 | 1700112J16Rik | 0,98 | No  |
| ENSMUSG00000097530 | -4,68E-02 | 4,728188506  | 3,66E-01  | 5,45E-01 | 8,13E-01 | Kansl2-ps     | 0,97 | No  |
| ENSMUSG00000097532 | 4,60E-02  | 1,540969498  | 7,30E-02  | 7,87E-01 | 9,53E-01 | Gm4349        | 1,03 | No  |
| ENSMUSG00000097533 | -1,41E-02 | 3,29099285   | 1,85E-02  | 8,92E-01 | 1,00E+00 | Gm26590       | 0,99 | No  |
| ENSMUSG00000097534 | 6,03E-01  | 0,710361966  | 7,06E+00  | 7,89E-03 | 7,82E-02 | Gm16675       | 1,52 | No  |
| ENSMUSG00000097535 | -6,74E-01 | -1,879844707 | 1,09E+00  | 2,96E-01 | 5,92E-01 | Gm26592       | 0,63 | No  |
| ENSMUSG00000097536 | -3,67E-01 | 0,160091884  | 1,98E+00  | 1,60E-01 | 5,07E-01 | 2610037D02Rik | 0,78 | No  |

|                    |           |              |           |          |          |               |      |    |
|--------------------|-----------|--------------|-----------|----------|----------|---------------|------|----|
| ENSMUSG00000097537 | 7,11E-02  | 3,108312818  | 4,18E-01  | 5,18E-01 | 7,98E-01 | 2610020C07Rik | 1,05 | No |
| ENSMUSG00000097542 | -1,86E-02 | -0,627561959 | 2,31E-03  | 9,62E-01 | 1,00E+00 | Gm26751       | 0,99 | No |
| ENSMUSG00000097544 | 2,07E-02  | 3,29607965   | 3,85E-02  | 8,44E-01 | 9,86E-01 | Gm26750       | 1,01 | No |
| ENSMUSG00000097546 | 1,45E-01  | 2,641448506  | 1,36E+00  | 2,44E-01 | 5,50E-01 | Gm26749       | 1,11 | No |
| ENSMUSG00000097553 | -3,52E-01 | -2,205866133 | 2,37E-01  | 6,26E-01 | 8,60E-01 | 4930455D15Rik | 0,78 | No |
| ENSMUSG00000097554 | -1,27E-01 | 9,642881988  | 5,11E+00  | 2,38E-02 | 1,69E-01 | Gm26825       | 0,92 | No |
| ENSMUSG00000097557 | -2,04E+00 | -2,42473396  | 4,14E+00  | 4,19E-02 | 2,43E-01 | C130060C02Rik | 0,24 | No |
| ENSMUSG00000097558 | 1,72E-01  | 1,928171131  | 1,12E+00  | 2,91E-01 | 5,86E-01 | Gm26902       | 1,13 | No |
| ENSMUSG00000097559 | 3,57E-01  | 0,078866568  | 1,62E+00  | 2,03E-01 | 5,50E-01 | D430018E03Rik | 1,28 | No |
| ENSMUSG00000097560 | -1,34E-01 | 1,399443581  | 5,35E-01  | 4,65E-01 | 7,53E-01 | Gm26904       | 0,91 | No |
| ENSMUSG00000097561 | 1,24E+00  | -2,770612272 | 9,55E-01  | 3,28E-01 | 6,29E-01 | 4632411P08Rik | 2,36 | No |
| ENSMUSG00000097564 | -1,00E-01 | 1,661203209  | 3,69E-01  | 5,43E-01 | 8,12E-01 | C430014B12Rik | 0,93 | No |
| ENSMUSG00000097565 | 1,56E-01  | 0,65232549   | 4,53E-01  | 5,01E-01 | 7,86E-01 | Gm26965       | 1,11 | No |
| ENSMUSG00000097566 | -1,30E+00 | -2,12675958  | 3,16E+00  | 7,53E-02 | 3,49E-01 | A930024N18Rik | 0,41 | No |
| ENSMUSG00000097567 | 3,05E-01  | 1,456506285  | 3,03E+00  | 8,17E-02 | 3,67E-01 | Gm26637       | 1,24 | No |
| ENSMUSG00000097569 | 4,39E-01  | -2,448692668 | 2,60E-01  | 6,10E-01 | 8,51E-01 | Gm26640       | 1,36 | No |
| ENSMUSG00000097572 | 1,68E+00  | -1,832005873 | 4,98E+00  | 2,56E-02 | 1,78E-01 | Gm26797       | 3,20 | No |
| ENSMUSG00000097573 | 8,63E-01  | -1,436659162 | 1,98E+00  | 1,59E-01 | 5,06E-01 | G730003C15Rik | 1,82 | No |
| ENSMUSG00000097574 | -2,03E-01 | 1,465201501  | 1,28E+00  | 2,58E-01 | 5,50E-01 | C920006O11Rik | 0,87 | No |
| ENSMUSG00000097575 | 9,01E-03  | -3,107646452 | -5,16E-10 | 1,00E+00 | 1,00E+00 | Gm26796       | 1,01 | No |
| ENSMUSG00000097576 | -3,57E-01 | 0,737279212  | 2,50E+00  | 1,14E-01 | 4,16E-01 | D930030I03Rik | 0,78 | No |
| ENSMUSG00000097577 | -7,25E-02 | 3,021773648  | 4,19E-01  | 5,17E-01 | 7,98E-01 | 6230400D17Rik | 0,95 | No |
| ENSMUSG00000097578 | 5,69E-01  | -0,098032778 | 3,07E+00  | 7,95E-02 | 3,61E-01 | Gm26798       | 1,48 | No |
| ENSMUSG00000097579 | -4,19E-02 | -0,800818396 | 1,14E-02  | 9,15E-01 | 1,00E+00 | Gm26799       | 0,97 | No |
| ENSMUSG00000097582 | 2,33E-01  | 3,29608657   | 4,81E+00  | 2,82E-02 | 1,90E-01 | Gm26527       | 1,18 | No |
| ENSMUSG00000097583 | -3,21E-01 | -0,372241391 | 9,38E-01  | 3,33E-01 | 6,33E-01 | 6430590A07Rik | 0,80 | No |
| ENSMUSG00000097584 | -1,89E+00 | -3,1076441   | 1,42E+00  | 2,33E-01 | 5,50E-01 | 1700125G22Rik | 0,27 | No |
| ENSMUSG00000097585 | 3,25E-01  | 2,851608118  | 7,82E+00  | 5,16E-03 | 5,72E-02 | E230029C05Rik | 1,25 | No |
| ENSMUSG00000097586 | 2,78E-02  | -0,185535044 | 8,10E-03  | 9,28E-01 | 1,00E+00 | Gm26528       | 1,02 | No |
| ENSMUSG00000097587 | -6,24E-02 | -2,832021275 | 1,71E-03  | 9,67E-01 | 1,00E+00 | 4930578M01Rik | 0,96 | No |
| ENSMUSG00000097589 | -8,94E-03 | 3,279310299  | 7,25E-03  | 9,32E-01 | 1,00E+00 | Dleu2         | 0,99 | No |
| ENSMUSG00000097590 | -5,20E-02 | 1,936691005  | 1,17E-01  | 7,32E-01 | 9,22E-01 | Gm26675       | 0,96 | No |

|                    |           |              |           |          |          |               |      |     |
|--------------------|-----------|--------------|-----------|----------|----------|---------------|------|-----|
| ENSMUSG00000097591 | -6,23E-01 | -2,401349828 | 5,29E-01  | 4,67E-01 | 7,55E-01 | A330032B11Rik | 0,65 | No  |
| ENSMUSG00000097592 | -2,97E-01 | -1,257452994 | 3,55E-01  | 5,52E-01 | 8,18E-01 | 4930500F10Rik | 0,81 | No  |
| ENSMUSG00000097593 | -8,48E-01 | -2,83197049  | 3,94E-01  | 5,30E-01 | 8,05E-01 | Gm26676       | 0,56 | No  |
| ENSMUSG00000097595 | 1,48E-01  | 1,019258573  | 5,42E-01  | 4,61E-01 | 7,50E-01 | 1500002F19Rik | 1,11 | No  |
| ENSMUSG00000097597 | 1,11E-01  | -0,165782418 | 1,00E-01  | 7,51E-01 | 9,32E-01 | Gm26674       | 1,08 | No  |
| ENSMUSG00000097599 | -2,49E-02 | -3,146121042 | -4,44E-11 | 1,00E+00 | 1,00E+00 | Gm26678       | 0,98 | No  |
| ENSMUSG00000097601 | -1,64E-01 | 0,152082838  | 3,91E-01  | 5,32E-01 | 8,05E-01 | Gm26660       | 0,89 | No  |
| ENSMUSG00000097602 | 5,52E-01  | -2,378276571 | 2,88E-01  | 5,92E-01 | 8,42E-01 | 4930519P11Rik | 1,47 | No  |
| ENSMUSG00000097603 | 2,66E+00  | -2,896142625 | 2,73E+00  | 9,86E-02 | 3,91E-01 | A430010J10Rik | 6,32 | No  |
| ENSMUSG00000097604 | -1,31E+00 | -2,126673518 | 2,94E+00  | 8,63E-02 | 3,78E-01 | Gm17322       | 0,40 | No  |
| ENSMUSG00000097605 | -3,74E-01 | 2,900659226  | 9,58E+00  | 1,96E-03 | 2,76E-02 | 9430098F02Rik | 0,77 | Yes |
| ENSMUSG00000097612 | -1,36E+00 | -2,831949618 | 1,15E+00  | 2,83E-01 | 5,79E-01 | Gm26509       | 0,39 | No  |
| ENSMUSG00000097614 | 7,76E-02  | 1,87070502   | 2,55E-01  | 6,14E-01 | 8,53E-01 | Gm26508       | 1,06 | No  |
| ENSMUSG00000097616 | 3,40E-01  | 1,066019605  | 2,81E+00  | 9,35E-02 | 3,83E-01 | 1110019D14Rik | 1,27 | No  |
| ENSMUSG00000097617 | 3,15E+00  | -2,60066961  | 4,05E+00  | 4,41E-02 | 2,50E-01 | Gm10687       | 8,90 | No  |
| ENSMUSG00000097619 | -1,87E+00 | -3,107637761 | 1,39E+00  | 2,38E-01 | 5,50E-01 | 4833422M21Rik | 0,27 | No  |
| ENSMUSG00000097620 | 6,83E-02  | 3,283418893  | 4,20E-01  | 5,17E-01 | 7,98E-01 | 4921514A10Rik | 1,05 | No  |
| ENSMUSG00000097621 | -1,87E+00 | -3,107637761 | 1,39E+00  | 2,38E-01 | 5,50E-01 | Gm26562       | 0,27 | No  |
| ENSMUSG00000097622 | 2,06E-02  | -3,146103739 | -9,26E-10 | 1,00E+00 | 1,00E+00 | A330033J07Rik | 1,01 | No  |
| ENSMUSG00000097625 | -4,83E-01 | 1,610737046  | 7,93E+00  | 4,86E-03 | 5,48E-02 | Gm26561       | 0,72 | No  |
| ENSMUSG00000097628 | 9,01E-03  | -3,107646452 | -5,16E-10 | 1,00E+00 | 1,00E+00 | Gm2383        | 1,01 | No  |
| ENSMUSG00000097632 | -1,49E+00 | -1,497557935 | 4,85E+00  | 2,76E-02 | 1,87E-01 | 4930552P12Rik | 0,36 | No  |
| ENSMUSG00000097633 | -3,41E-01 | 3,368037406  | 1,15E+01  | 6,78E-04 | 1,17E-02 | Gm16617       | 0,79 | Yes |
| ENSMUSG00000097634 | -1,57E-01 | 0,81440832   | 4,79E-01  | 4,89E-01 | 7,76E-01 | Gm26827       | 0,90 | No  |
| ENSMUSG00000097635 | 6,39E-02  | 1,232971882  | 1,10E-01  | 7,40E-01 | 9,26E-01 | Gm26826       | 1,05 | No  |
| ENSMUSG00000097636 | -4,41E-01 | 1,621778186  | 7,06E+00  | 7,88E-03 | 7,81E-02 | Mirt1         | 0,74 | No  |
| ENSMUSG00000097637 | 3,30E-02  | 0,537060774  | 1,90E-02  | 8,90E-01 | 1,00E+00 | 4933417D19Rik | 1,02 | No  |
| ENSMUSG00000097638 | 1,85E+00  | -2,963264462 | 1,34E+00  | 2,48E-01 | 5,50E-01 | Carlr         | 3,59 | No  |
| ENSMUSG00000097640 | 1,93E-01  | 0,821501308  | 7,83E-01  | 3,76E-01 | 6,77E-01 | Gm20033       | 1,14 | No  |
| ENSMUSG00000097641 | 1,85E-01  | 0,551197351  | 6,00E-01  | 4,38E-01 | 7,31E-01 | Gm26865       | 1,14 | No  |
| ENSMUSG00000097643 | 2,20E-01  | 0,412641424  | 7,08E-01  | 4,00E-01 | 6,99E-01 | A130051J06Rik | 1,16 | No  |
| ENSMUSG00000097644 | 1,19E-01  | -2,033665877 | 2,78E-02  | 8,68E-01 | 1,00E+00 | Gm26862       | 1,09 | No  |

|                    |           |              |           |          |          |               |      |     |
|--------------------|-----------|--------------|-----------|----------|----------|---------------|------|-----|
| ENSMUSG00000097645 | 6,82E-01  | -1,015767832 | 1,94E+00  | 1,63E-01 | 5,14E-01 | Gm26863       | 1,60 | No  |
| ENSMUSG00000097649 | -5,89E-02 | -2,655133955 | 2,76E-03  | 9,58E-01 | 1,00E+00 | Gm10561       | 0,96 | No  |
| ENSMUSG00000097650 | 2,66E-01  | -1,015638619 | 3,62E-01  | 5,48E-01 | 8,15E-01 | 4921507G05Rik | 1,20 | No  |
| ENSMUSG00000097652 | -4,41E-01 | -2,348416063 | 2,51E-01  | 6,16E-01 | 8,55E-01 | Mhrt          | 0,74 | No  |
| ENSMUSG00000097656 | -3,89E-01 | 1,677880819  | 5,63E+00  | 1,77E-02 | 1,39E-01 | Gm26712       | 0,76 | No  |
| ENSMUSG00000097657 | 4,36E-02  | 5,264790535  | 3,71E-01  | 5,43E-01 | 8,12E-01 | Gm7389        | 1,03 | No  |
| ENSMUSG00000097658 | 3,30E-02  | 3,786693607  | 1,25E-01  | 7,24E-01 | 9,17E-01 | Gm16755       | 1,02 | No  |
| ENSMUSG00000097660 | 7,90E-02  | 5,128731238  | 1,17E+00  | 2,79E-01 | 5,75E-01 | Gm26762       | 1,06 | No  |
| ENSMUSG00000097661 | 5,86E-01  | -2,185642357 | 3,83E-01  | 5,36E-01 | 8,08E-01 | Gm26763       | 1,50 | No  |
| ENSMUSG00000097662 | -2,68E+00 | -2,448622538 | 6,58E+00  | 1,03E-02 | 9,55E-02 | Gm2093        | 0,16 | No  |
| ENSMUSG00000097664 | 6,54E-02  | 3,538125087  | 4,38E-01  | 5,08E-01 | 7,92E-01 | Gm26765       | 1,05 | No  |
| ENSMUSG00000097665 | 1,10E-01  | -0,10306642  | 1,30E-01  | 7,18E-01 | 9,15E-01 | Gm16853       | 1,08 | No  |
| ENSMUSG00000097667 | 1,33E-01  | 0,198860825  | 2,32E-01  | 6,30E-01 | 8,63E-01 | Gm26764       | 1,10 | No  |
| ENSMUSG00000097671 | -1,14E-02 | -3,033635021 | 1,50E-05  | 9,97E-01 | 1,00E+00 | 1700015O11Rik | 0,99 | No  |
| ENSMUSG00000097672 | -8,23E-01 | -2,311215267 | 9,89E-01  | 3,20E-01 | 6,21E-01 | Gm26609       | 0,57 | No  |
| ENSMUSG00000097673 | -1,32E+00 | -2,711672046 | 1,09E+00  | 2,97E-01 | 5,92E-01 | Gm26608       | 0,40 | No  |
| ENSMUSG00000097674 | -7,99E-01 | 0,365869108  | 8,90E+00  | 2,85E-03 | 3,68E-02 | Gm26610       | 0,57 | Yes |
| ENSMUSG00000097675 | -1,93E-03 | 3,557452913  | 3,88E-04  | 9,84E-01 | 1,00E+00 | 1700101I11Rik | 1,00 | No  |
| ENSMUSG00000097676 | -1,89E+00 | -3,1076441   | 1,42E+00  | 2,33E-01 | 5,50E-01 | Gm26612       | 0,27 | No  |
| ENSMUSG00000097677 | 9,93E-02  | -1,155903616 | 4,77E-02  | 8,27E-01 | 9,75E-01 | Gm26611       | 1,07 | No  |
| ENSMUSG00000097679 | -1,10E-01 | 2,967662116  | 9,49E-01  | 3,30E-01 | 6,30E-01 | Rps19-ps5     | 0,93 | No  |
| ENSMUSG00000097680 | 1,06E-01  | 3,625713783  | 1,19E+00  | 2,75E-01 | 5,71E-01 | Gm26642       | 1,08 | No  |
| ENSMUSG00000097681 | 1,16E-01  | 0,999807129  | 3,17E-01  | 5,73E-01 | 8,33E-01 | Gm26643       | 1,08 | No  |
| ENSMUSG00000097683 | 9,01E-03  | -3,107646452 | -5,16E-10 | 1,00E+00 | 1,00E+00 | Gm26644       | 1,01 | No  |
| ENSMUSG00000097685 | 6,85E-02  | 0,285740856  | 6,69E-02  | 7,96E-01 | 9,57E-01 | Gm26646       | 1,05 | No  |
| ENSMUSG00000097690 | -2,86E-01 | -1,497635482 | 2,77E-01  | 5,98E-01 | 8,46E-01 | 4930505N22Rik | 0,82 | No  |
| ENSMUSG00000097692 | -4,19E-01 | 0,259122941  | 2,31E+00  | 1,29E-01 | 4,50E-01 | A230060F14Rik | 0,75 | No  |
| ENSMUSG00000097693 | 1,87E+00  | -3,107639691 | 1,38E+00  | 2,40E-01 | 5,50E-01 | 4930471M09Rik | 3,67 | No  |
| ENSMUSG00000097694 | 4,39E-01  | -2,711743113 | 1,50E-01  | 6,98E-01 | 9,04E-01 | G730013B05Rik | 1,36 | No  |
| ENSMUSG00000097695 | -6,44E-02 | -2,832012081 | 2,81E-03  | 9,58E-01 | 1,00E+00 | Gm26905       | 0,96 | No  |
| ENSMUSG00000097697 | 1,87E+00  | -3,03364371  | 1,36E+00  | 2,43E-01 | 5,50E-01 | 4833412C05Rik | 3,66 | No  |
| ENSMUSG00000097699 | -1,24E+00 | -1,595946908 | 4,73E+00  | 2,97E-02 | 1,97E-01 | 5430400D12Rik | 0,42 | No  |

|                    |           |              |          |          |          |               |      |     |
|--------------------|-----------|--------------|----------|----------|----------|---------------|------|-----|
| ENSMUSG00000097700 | 1,10E-01  | 0,821742931  | 2,36E-01 | 6,27E-01 | 8,60E-01 | Gm26738       | 1,08 | No  |
| ENSMUSG00000097701 | -1,11E-02 | -2,770563519 | 8,61E-05 | 9,93E-01 | 1,00E+00 | Gm17508       | 0,99 | No  |
| ENSMUSG00000097702 | 1,36E+00  | -2,655131682 | 1,89E+00 | 1,69E-01 | 5,23E-01 | Gm26739       | 2,57 | No  |
| ENSMUSG00000097703 | 4,52E-01  | 0,167629408  | 2,72E+00 | 9,93E-02 | 3,92E-01 | Gm26623       | 1,37 | No  |
| ENSMUSG00000097704 | 1,59E-01  | 0,309767725  | 3,67E-01 | 5,45E-01 | 8,13E-01 | Gm26741       | 1,12 | No  |
| ENSMUSG00000097705 | 1,47E-01  | 0,819344177  | 4,26E-01 | 5,14E-01 | 7,96E-01 | Gm26740       | 1,11 | No  |
| ENSMUSG00000097706 | -1,75E-01 | 0,595823924  | 5,41E-01 | 4,62E-01 | 7,51E-01 | E030037K01Rik | 0,89 | No  |
| ENSMUSG00000097707 | -4,65E-01 | -0,580796297 | 1,59E+00 | 2,08E-01 | 5,50E-01 | Gm26742       | 0,72 | No  |
| ENSMUSG00000097709 | 2,08E-01  | 1,537587487  | 1,44E+00 | 2,31E-01 | 5,50E-01 | 2810429I04Rik | 1,15 | No  |
| ENSMUSG00000097711 | 2,08E+00  | -1,963291842 | 5,51E+00 | 1,90E-02 | 1,46E-01 | Gm5523        | 4,23 | No  |
| ENSMUSG00000097712 | -1,50E-01 | 0,251673897  | 3,10E-01 | 5,77E-01 | 8,35E-01 | Gm10532       | 0,90 | No  |
| ENSMUSG00000097713 | 4,43E-01  | -2,832059334 | 1,53E-01 | 6,95E-01 | 9,02E-01 | Gm7741        | 1,36 | No  |
| ENSMUSG00000097715 | 8,60E-02  | 6,592672903  | 1,90E+00 | 1,68E-01 | 5,22E-01 | Gpr137b-ps    | 1,06 | No  |
| ENSMUSG00000097716 | 1,34E+00  | -2,548225636 | 1,83E+00 | 1,76E-01 | 5,35E-01 | 1700026J14Rik | 2,53 | No  |
| ENSMUSG00000097718 | 1,39E-01  | -0,58085082  | 1,48E-01 | 7,01E-01 | 9,05E-01 | Gm26896       | 1,10 | No  |
| ENSMUSG00000097719 | -9,39E-01 | -2,401342534 | 7,73E-01 | 3,79E-01 | 6,80E-01 | Rpl31-ps18    | 0,52 | No  |
| ENSMUSG00000097720 | 1,86E+00  | -3,033661846 | 1,35E+00 | 2,46E-01 | 5,50E-01 | Gm26849       | 3,62 | No  |
| ENSMUSG00000097722 | 1,51E-01  | 2,285485193  | 1,17E+00 | 2,79E-01 | 5,76E-01 | Gm26841       | 1,11 | No  |
| ENSMUSG00000097723 | 6,92E-02  | -0,338768297 | 4,08E-02 | 8,40E-01 | 9,83E-01 | Gm26848       | 1,05 | No  |
| ENSMUSG00000097724 | -6,20E-02 | 3,479488823  | 3,90E-01 | 5,32E-01 | 8,06E-01 | Gm26850       | 0,96 | No  |
| ENSMUSG00000097725 | 9,35E-01  | -2,522703546 | 1,08E+00 | 2,98E-01 | 5,94E-01 | 4930593A02Rik | 1,91 | No  |
| ENSMUSG00000097727 | -1,85E-01 | -1,711784562 | 1,00E-01 | 7,52E-01 | 9,32E-01 | F630040K05Rik | 0,88 | No  |
| ENSMUSG00000097728 | -6,35E-01 | -1,509962933 | 1,42E+00 | 2,34E-01 | 5,50E-01 | Gm26840       | 0,64 | No  |
| ENSMUSG00000097729 | -1,84E-01 | 2,652333255  | 2,22E+00 | 1,37E-01 | 4,66E-01 | 2310015A10Rik | 0,88 | No  |
| ENSMUSG00000097730 | 2,68E-01  | 2,647067105  | 4,55E+00 | 3,28E-02 | 2,12E-01 | Gm26588       | 1,20 | No  |
| ENSMUSG00000097731 | 2,01E-01  | 2,669525296  | 2,67E+00 | 1,02E-01 | 3,95E-01 | 2700016F22Rik | 1,15 | No  |
| ENSMUSG00000097732 | 1,71E-01  | 0,302690257  | 4,05E-01 | 5,25E-01 | 8,02E-01 | D930048G16Rik | 1,13 | No  |
| ENSMUSG00000097734 | 1,04E-01  | -0,904370565 | 6,44E-02 | 8,00E-01 | 9,60E-01 | B930082K07Rik | 1,07 | No  |
| ENSMUSG00000097736 | 2,23E+00  | -1,627707517 | 9,19E+00 | 2,43E-03 | 3,26E-02 | 9530059O14Rik | 4,68 | Yes |
| ENSMUSG00000097737 | -4,64E-02 | 2,948638715  | 1,61E-01 | 6,88E-01 | 8,98E-01 | Gm26530       | 0,97 | No  |
| ENSMUSG00000097738 | -3,35E-01 | -1,333135134 | 4,57E-01 | 4,99E-01 | 7,84E-01 | 4930445N18Rik | 0,79 | No  |
| ENSMUSG00000097739 | 4,41E-01  | -1,448691429 | 8,07E-01 | 3,69E-01 | 6,70E-01 | Gm2539        | 1,36 | No  |

|                    |           |              |          |          |          |               |      |    |
|--------------------|-----------|--------------|----------|----------|----------|---------------|------|----|
| ENSMUSG00000097740 | 1,87E+00  | -3,107639691 | 1,38E+00 | 2,40E-01 | 5,50E-01 | E030044B06Rik | 3,67 | No |
| ENSMUSG00000097742 | -4,66E-01 | -0,107506178 | 2,41E+00 | 1,21E-01 | 4,33E-01 | Gm26535       | 0,72 | No |
| ENSMUSG00000097743 | -4,53E-01 | 1,613093656  | 7,18E+00 | 7,37E-03 | 7,45E-02 | Gm16973       | 0,73 | No |
| ENSMUSG00000097744 | -5,88E-02 | -3,033616507 | 1,62E-03 | 9,68E-01 | 1,00E+00 | D030040B21Rik | 0,96 | No |
| ENSMUSG00000097746 | -5,48E-01 | -1,033541997 | 1,61E+00 | 2,05E-01 | 5,50E-01 | Gm6225        | 0,68 | No |
| ENSMUSG00000097747 | 2,84E-02  | -1,267975732 | 3,20E-03 | 9,55E-01 | 1,00E+00 | Gm26534       | 1,02 | No |
| ENSMUSG00000097748 | 7,17E-02  | 4,100428126  | 6,92E-01 | 4,06E-01 | 7,02E-01 | Gm26533       | 1,05 | No |
| ENSMUSG00000097749 | 8,57E-01  | -2,268144934 | 1,13E+00 | 2,88E-01 | 5,84E-01 | Gm16938       | 1,81 | No |
| ENSMUSG00000097750 | -2,12E-03 | 3,667267127  | 4,92E-04 | 9,82E-01 | 1,00E+00 | Gm4673        | 1,00 | No |
| ENSMUSG00000097751 | 1,74E-01  | -0,574118587 | 1,91E-01 | 6,62E-01 | 8,83E-01 | Gm26690       | 1,13 | No |
| ENSMUSG00000097754 | 3,56E-01  | 0,551144588  | 2,06E+00 | 1,51E-01 | 4,92E-01 | Ptgs2os2      | 1,28 | No |
| ENSMUSG00000097755 | 1,01E-01  | 0,644441352  | 1,82E-01 | 6,70E-01 | 8,88E-01 | 2010110K18Rik | 1,07 | No |
| ENSMUSG00000097757 | -4,69E-01 | -1,401179192 | 5,86E-01 | 4,44E-01 | 7,35E-01 | Gm17518       | 0,72 | No |
| ENSMUSG00000097759 | -5,65E-01 | -2,600613767 | 2,51E-01 | 6,17E-01 | 8,55E-01 | Gm26753       | 0,68 | No |
| ENSMUSG00000097760 | 4,31E-02  | 0,217917336  | 2,68E-02 | 8,70E-01 | 1,00E+00 | 6030442K20Rik | 1,03 | No |
| ENSMUSG00000097761 | -4,93E-01 | -2,71170083  | 2,20E-01 | 6,39E-01 | 8,69E-01 | 4930534D22Rik | 0,71 | No |
| ENSMUSG00000097762 | -2,47E+00 | -2,205779778 | 6,92E+00 | 8,53E-03 | 8,30E-02 | 4732463B04Rik | 0,18 | No |
| ENSMUSG00000097763 | 1,31E-02  | 2,87869626   | 1,25E-02 | 9,11E-01 | 1,00E+00 | Gm26636       | 1,01 | No |
| ENSMUSG00000097764 | -4,92E-01 | 0,593145327  | 3,97E+00 | 4,63E-02 | 2,57E-01 | Gm26635       | 0,71 | No |
| ENSMUSG00000097766 | -8,85E-02 | 0,927383099  | 1,79E-01 | 6,72E-01 | 8,89E-01 | 5730420D15Rik | 0,94 | No |
| ENSMUSG00000097768 | -2,98E-01 | 1,110083323  | 2,21E+00 | 1,37E-01 | 4,68E-01 | 2310043M15Rik | 0,81 | No |
| ENSMUSG00000097769 | 7,21E-02  | 2,037910633  | 2,44E-01 | 6,21E-01 | 8,57E-01 | Snhg4         | 1,05 | No |
| ENSMUSG00000097772 | 1,88E-01  | 2,288571957  | 1,85E+00 | 1,74E-01 | 5,31E-01 | 5430416N02Rik | 1,14 | No |
| ENSMUSG00000097773 | -5,23E-01 | -1,574144831 | 6,64E-01 | 4,15E-01 | 7,10E-01 | Gm10614       | 0,70 | No |
| ENSMUSG00000097775 | 2,89E-01  | -0,561234517 | 5,59E-01 | 4,55E-01 | 7,44E-01 | 4931440J10Rik | 1,22 | No |
| ENSMUSG00000097777 | -1,02E-01 | 1,366991469  | 3,29E-01 | 5,66E-01 | 8,28E-01 | Gm16794       | 0,93 | No |
| ENSMUSG00000097779 | -2,72E-01 | 1,946084706  | 3,32E+00 | 6,82E-02 | 3,29E-01 | 4833407H14Rik | 0,83 | No |
| ENSMUSG00000097781 | 3,51E-01  | 0,425857265  | 1,84E+00 | 1,74E-01 | 5,32E-01 | 9330136K24Rik | 1,28 | No |
| ENSMUSG00000097784 | 5,54E-01  | -1,510024458 | 7,86E-01 | 3,75E-01 | 6,76E-01 | A430105J06Rik | 1,47 | No |
| ENSMUSG00000097785 | -7,81E-02 | -0,389825995 | 4,82E-02 | 8,26E-01 | 9,75E-01 | B230217O12Rik | 0,95 | No |
| ENSMUSG00000097786 | 3,79E-01  | -1,896118115 | 3,48E-01 | 5,55E-01 | 8,20E-01 | 4933429H19Rik | 1,30 | No |
| ENSMUSG00000097787 | -1,76E-01 | -0,620816971 | 2,37E-01 | 6,27E-01 | 8,60E-01 | 2700046G09Rik | 0,88 | No |



|                    |           |              |           |          |          |               |       |     |
|--------------------|-----------|--------------|-----------|----------|----------|---------------|-------|-----|
| ENSMUSG00000097788 | 5,97E-03  | -3,1461183   | -3,40E-10 | 1,00E+00 | 1,00E+00 | Gm16596       | 1,00  | No  |
| ENSMUSG00000097789 | 5,81E-01  | -1,006913829 | 1,61E+00  | 2,04E-01 | 5,50E-01 | Gm2115        | 1,50  | No  |
| ENSMUSG00000097790 | -1,10E-01 | 3,59140718   | 1,30E+00  | 2,55E-01 | 5,50E-01 | Gm16399       | 0,93  | No  |
| ENSMUSG00000097791 | -4,50E-02 | 0,159995474  | 2,63E-02  | 8,71E-01 | 1,00E+00 | Gm17315       | 0,97  | No  |
| ENSMUSG00000097792 | -3,55E-02 | 0,258871235  | 1,70E-02  | 8,96E-01 | 1,00E+00 | Gm27042       | 0,98  | No  |
| ENSMUSG00000097793 | 6,51E-02  | 0,32718576   | 6,69E-02  | 7,96E-01 | 9,57E-01 | Gm17259       | 1,05  | No  |
| ENSMUSG00000097795 | -8,45E-01 | -2,963241229 | 3,92E-01  | 5,31E-01 | 8,05E-01 | Gm7678        | 0,56  | No  |
| ENSMUSG00000097796 | -8,24E-01 | -2,831958679 | 3,73E-01  | 5,42E-01 | 8,11E-01 | Gm16702       | 0,56  | No  |
| ENSMUSG00000097797 | -7,22E-01 | -2,226263993 | 8,86E-01  | 3,46E-01 | 6,47E-01 | Gm26901       | 0,61  | No  |
| ENSMUSG00000097799 | -5,03E-02 | 5,929708895  | 5,81E-01  | 4,46E-01 | 7,37E-01 | Gm26899       | 0,97  | No  |
| ENSMUSG00000097800 | 1,87E+00  | -3,107639691 | 1,38E+00  | 2,40E-01 | 5,50E-01 | B230344G16Rik | 3,67  | No  |
| ENSMUSG00000097801 | 9,01E-03  | -3,107646452 | -5,16E-10 | 1,00E+00 | 1,00E+00 | Gm26777       | 1,01  | No  |
| ENSMUSG00000097803 | 5,80E-02  | 1,052098755  | 7,97E-02  | 7,78E-01 | 9,47E-01 | Rpl31-ps16    | 1,04  | No  |
| ENSMUSG00000097804 | -7,62E-01 | 1,938408447  | 2,68E+01  | 2,29E-07 | 1,19E-05 | Gm16685       | 0,59  | Yes |
| ENSMUSG00000097809 | 1,87E+00  | -3,107639691 | 1,38E+00  | 2,40E-01 | 5,50E-01 | Gm26554       | 3,67  | No  |
| ENSMUSG00000097811 | -2,07E-02 | 2,452026154  | 2,55E-02  | 8,73E-01 | 1,00E+00 | 2810425M01Rik | 0,99  | No  |
| ENSMUSG00000097812 | 1,61E+00  | -2,770658115 | 1,78E+00  | 1,82E-01 | 5,45E-01 | Gm26812       | 3,05  | No  |
| ENSMUSG00000097814 | -2,48E-01 | -1,863557255 | 1,21E-01  | 7,28E-01 | 9,19E-01 | Panct2        | 0,84  | No  |
| ENSMUSG00000097815 | -7,35E-02 | 3,291024571  | 4,91E-01  | 4,84E-01 | 7,71E-01 | Gm26809       | 0,95  | No  |
| ENSMUSG00000097816 | 2,33E-01  | 5,760640469  | 1,20E+01  | 5,33E-04 | 9,65E-03 | Gm26811       | 1,18  | Yes |
| ENSMUSG00000097817 | -7,66E-01 | -0,785541985 | 3,96E+00  | 4,66E-02 | 2,58E-01 | Gm26810       | 0,59  | No  |
| ENSMUSG00000097818 | 4,35E-01  | -0,461019422 | 1,62E+00  | 2,03E-01 | 5,50E-01 | Gm26681       | 1,35  | No  |
| ENSMUSG00000097819 | -1,95E-01 | 0,98418571   | 8,16E-01  | 3,66E-01 | 6,67E-01 | Gm26813       | 0,87  | No  |
| ENSMUSG00000097820 | 2,60E-02  | 4,520113468  | 1,03E-01  | 7,48E-01 | 9,30E-01 | E530011L22Rik | 1,02  | No  |
| ENSMUSG00000097823 | -1,67E+00 | -2,246965969 | 3,66E+00  | 5,58E-02 | 2,90E-01 | Gm16701       | 0,31  | No  |
| ENSMUSG00000097827 | -9,42E-01 | -2,655116979 | 7,78E-01  | 3,78E-01 | 6,79E-01 | 5330439K02Rik | 0,52  | No  |
| ENSMUSG00000097828 | 1,25E-01  | 1,537835469  | 5,18E-01  | 4,72E-01 | 7,60E-01 | 6430562O15Rik | 1,09  | No  |
| ENSMUSG00000097831 | 3,34E+00  | -2,89616196  | 4,68E+00  | 3,05E-02 | 2,01E-01 | 4930540M05Rik | 10,10 | No  |
| ENSMUSG00000097832 | -3,38E-02 | -0,060843371 | 1,30E-02  | 9,09E-01 | 1,00E+00 | Gm26912       | 0,98  | No  |
| ENSMUSG00000097833 | -1,64E-01 | -1,289437934 | 9,75E-02  | 7,55E-01 | 9,34E-01 | Gm5976        | 0,89  | No  |
| ENSMUSG00000097835 | -1,54E-01 | -1,278803571 | 1,06E-01  | 7,45E-01 | 9,29E-01 | Gm26910       | 0,90  | No  |
| ENSMUSG00000097836 | -1,23E+00 | -3,146117124 | 7,12E-01  | 3,99E-01 | 6,98E-01 | Gm26903       | 0,42  | No  |

|                    |           |              |           |          |          |               |      |     |
|--------------------|-----------|--------------|-----------|----------|----------|---------------|------|-----|
| ENSMUSG00000097838 | -1,94E+00 | -3,107619243 | 1,50E+00  | 2,21E-01 | 5,50E-01 | C530050E15Rik | 0,26 | No  |
| ENSMUSG00000097839 | -4,83E-01 | -1,006683716 | 1,28E+00  | 2,58E-01 | 5,50E-01 | Gm26909       | 0,72 | No  |
| ENSMUSG00000097840 | -5,41E-01 | -1,863977803 | 7,81E-01  | 3,77E-01 | 6,78E-01 | Gm26756       | 0,69 | No  |
| ENSMUSG00000097842 | 1,18E-01  | -0,024522641 | 1,47E-01  | 7,01E-01 | 9,05E-01 | 9330104G04Rik | 1,09 | No  |
| ENSMUSG00000097843 | -1,22E+00 | -3,146113954 | 6,96E-01  | 4,04E-01 | 7,01E-01 | Gm26755       | 0,43 | No  |
| ENSMUSG00000097845 | 1,02E-01  | 1,928618384  | 4,41E-01  | 5,07E-01 | 7,91E-01 | A230020J21Rik | 1,07 | No  |
| ENSMUSG00000097848 | 3,09E-01  | 1,111886526  | 2,38E+00  | 1,23E-01 | 4,38E-01 | Gm807         | 1,24 | No  |
| ENSMUSG00000097852 | 7,25E-01  | -2,655150073 | 2,87E-01  | 5,92E-01 | 8,42E-01 | 4933405D12Rik | 1,65 | No  |
| ENSMUSG00000097854 | -1,74E-01 | 3,251034037  | 2,72E+00  | 9,89E-02 | 3,91E-01 | Gm26602       | 0,89 | No  |
| ENSMUSG00000097855 | 2,95E-01  | 4,272621354  | 1,21E+01  | 4,98E-04 | 9,14E-03 | A930007I19Rik | 1,23 | Yes |
| ENSMUSG00000097857 | -9,12E-01 | 0,330995553  | 1,05E+01  | 1,22E-03 | 1,91E-02 | Gm26603       | 0,53 | Yes |
| ENSMUSG00000097858 | -1,05E+00 | -1,863734002 | 2,79E+00  | 9,47E-02 | 3,85E-01 | 9530052C20Rik | 0,48 | No  |
| ENSMUSG00000097859 | -2,68E-01 | 0,019745838  | 7,11E-01  | 3,99E-01 | 6,98E-01 | Gm26601       | 0,83 | No  |
| ENSMUSG00000097860 | 1,42E-01  | 3,268816229  | 1,73E+00  | 1,89E-01 | 5,50E-01 | Gm26857       | 1,10 | No  |
| ENSMUSG00000097861 | -1,23E-01 | 0,783143554  | 3,14E-01  | 5,75E-01 | 8,34E-01 | Gm26858       | 0,92 | No  |
| ENSMUSG00000097862 | -1,68E-01 | -2,107560206 | 5,73E-02  | 8,11E-01 | 9,66E-01 | Gm26859       | 0,89 | No  |
| ENSMUSG00000097863 | -2,73E+00 | -2,963241672 | 2,94E+00  | 8,62E-02 | 3,78E-01 | 1010001B22Rik | 0,15 | No  |
| ENSMUSG00000097864 | 1,56E-01  | 1,130420479  | 6,27E-01  | 4,29E-01 | 7,22E-01 | Gm26856       | 1,11 | No  |
| ENSMUSG00000097867 | 1,04E-01  | 0,583848343  | 1,88E-01  | 6,65E-01 | 8,85E-01 | Lppos         | 1,07 | No  |
| ENSMUSG00000097868 | -1,94E-01 | -1,600735329 | 1,09E-01  | 7,41E-01 | 9,27E-01 | A330069E16Rik | 0,87 | No  |
| ENSMUSG00000097871 | 9,01E-03  | -3,107646452 | -5,16E-10 | 1,00E+00 | 1,00E+00 | B230104I21Rik | 1,01 | No  |
| ENSMUSG00000097872 | -1,58E+00 | -2,683115136 | 1,65E+00  | 1,98E-01 | 5,50E-01 | Gm26702       | 0,33 | No  |
| ENSMUSG00000097873 | 1,92E-01  | -2,740863372 | 2,70E-02  | 8,70E-01 | 1,00E+00 | Gm26867       | 1,14 | No  |
| ENSMUSG00000097874 | 2,09E-01  | -1,195773168 | 2,19E-01  | 6,40E-01 | 8,70E-01 | C030010L15Rik | 1,16 | No  |
| ENSMUSG00000097875 | -1,87E+00 | -3,107637761 | 1,39E+00  | 2,38E-01 | 5,50E-01 | Gm26704       | 0,27 | No  |
| ENSMUSG00000097876 | 6,11E-03  | 2,853644459  | 2,65E-03  | 9,59E-01 | 1,00E+00 | Gm16892       | 1,00 | No  |
| ENSMUSG00000097877 | 2,65E+00  | -3,033655087 | 2,73E+00  | 9,86E-02 | 3,91E-01 | Gm26703       | 6,30 | No  |
| ENSMUSG00000097879 | -3,29E-01 | 1,624799592  | 3,76E+00  | 5,25E-02 | 2,79E-01 | Gm26869       | 0,80 | No  |
| ENSMUSG00000097882 | 2,43E-01  | 1,591058112  | 1,95E+00  | 1,62E-01 | 5,12E-01 | 0610038B21Rik | 1,18 | No  |
| ENSMUSG00000097885 | -1,16E-01 | 1,093545923  | 3,46E-01  | 5,56E-01 | 8,21E-01 | 5031434O11Rik | 0,92 | No  |
| ENSMUSG00000097887 | -2,41E-01 | 1,788012249  | 2,25E+00  | 1,33E-01 | 4,59E-01 | Gm26542       | 0,85 | No  |
| ENSMUSG00000097888 | -2,68E+00 | -2,963200749 | 2,85E+00  | 9,14E-02 | 3,82E-01 | Gm26682       | 0,16 | No  |

|                    |           |              |           |          |          |               |      |     |
|--------------------|-----------|--------------|-----------|----------|----------|---------------|------|-----|
| ENSMUSG00000097889 | -2,64E-01 | 6,599536097  | 1,82E+01  | 1,98E-05 | 6,15E-04 | Gm26541       | 0,83 | Yes |
| ENSMUSG00000097890 | 4,38E-02  | -2,247148004 | 3,21E-03  | 9,55E-01 | 1,00E+00 | 4930547M16Rik | 1,03 | No  |
| ENSMUSG00000097891 | -1,14E-01 | 2,162748339  | 6,41E-01  | 4,23E-01 | 7,18E-01 | Gm3650        | 0,92 | No  |
| ENSMUSG00000097892 | 1,79E-01  | 0,61571973   | 6,09E-01  | 4,35E-01 | 7,28E-01 | Gm26801       | 1,13 | No  |
| ENSMUSG00000097893 | 3,31E-03  | 2,491587105  | 6,38E-04  | 9,80E-01 | 1,00E+00 | 1700034P13Rik | 1,00 | No  |
| ENSMUSG00000097895 | -1,24E+00 | -2,548251061 | 1,47E+00  | 2,25E-01 | 5,50E-01 | Gm18709       | 0,42 | No  |
| ENSMUSG00000097899 | 3,66E-02  | 0,981913341  | 2,88E-02  | 8,65E-01 | 9,98E-01 | Gm16894       | 1,03 | No  |
| ENSMUSG00000097900 | 3,00E-01  | -0,683148822 | 5,92E-01  | 4,41E-01 | 7,34E-01 | Gm8652        | 1,23 | No  |
| ENSMUSG00000097902 | -4,43E-01 | -2,355625813 | 2,01E-01  | 6,54E-01 | 8,79E-01 | Gm26531       | 0,74 | No  |
| ENSMUSG00000097903 | -6,08E-02 | 1,884133128  | 1,51E-01  | 6,98E-01 | 9,04E-01 | Gm26679       | 0,96 | No  |
| ENSMUSG00000097904 | -6,31E-01 | 1,562301546  | 1,38E+01  | 2,09E-04 | 4,50E-03 | Gm26711       | 0,65 | Yes |
| ENSMUSG00000097906 | -1,27E-01 | 7,872262832  | 4,72E+00  | 2,98E-02 | 1,98E-01 | Gm9625        | 0,92 | No  |
| ENSMUSG00000097908 | 2,39E-01  | 2,277832859  | 2,94E+00  | 8,62E-02 | 3,78E-01 | 4933404O12Rik | 1,18 | No  |
| ENSMUSG00000097911 | -1,87E+00 | -3,107637761 | 1,39E+00  | 2,38E-01 | 5,50E-01 | Gm26691       | 0,27 | No  |
| ENSMUSG00000097912 | -9,95E-01 | -2,35558503  | 1,20E+00  | 2,74E-01 | 5,70E-01 | 6330403N20Rik | 0,50 | No  |
| ENSMUSG00000097913 | -6,62E-02 | -0,992179683 | 1,99E-02  | 8,88E-01 | 1,00E+00 | Gm26837       | 0,96 | No  |
| ENSMUSG00000097914 | -2,52E-01 | 0,616103687  | 1,16E+00  | 2,82E-01 | 5,78E-01 | Gm26838       | 0,84 | No  |
| ENSMUSG00000097915 | -4,27E-01 | -0,065580954 | 2,32E+00  | 1,28E-01 | 4,48E-01 | A330009N23Rik | 0,74 | No  |
| ENSMUSG00000097917 | -2,96E+00 | -2,998004219 | 3,56E+00  | 5,91E-02 | 3,01E-01 | Gm26839       | 0,13 | No  |
| ENSMUSG00000097918 | 3,14E-02  | -3,107617333 | -7,69E-10 | 1,00E+00 | 1,00E+00 | Ascl5         | 1,02 | No  |
| ENSMUSG00000097919 | -6,38E-02 | 2,524871985  | 2,46E-01  | 6,20E-01 | 8,57E-01 | Gm27021       | 0,96 | No  |
| ENSMUSG00000097921 | -6,64E-01 | -1,257555392 | 1,70E+00  | 1,93E-01 | 5,50E-01 | Gm26576       | 0,63 | No  |
| ENSMUSG00000097923 | 2,90E-01  | -1,65521484  | 2,44E-01  | 6,22E-01 | 8,57E-01 | Gm26577       | 1,22 | No  |
| ENSMUSG00000097924 | 2,64E+00  | -2,896131192 | 2,70E+00  | 1,01E-01 | 3,92E-01 | A730020E08Rik | 6,24 | No  |
| ENSMUSG00000097926 | -4,46E-01 | -2,378278479 | 2,85E-01  | 5,94E-01 | 8,43E-01 | Gm26575       | 0,73 | No  |
| ENSMUSG00000097928 | 1,86E+00  | -3,033661846 | 1,35E+00  | 2,46E-01 | 5,50E-01 | Gm26578       | 3,62 | No  |
| ENSMUSG00000097930 | 7,14E-01  | -2,832049855 | 2,78E-01  | 5,98E-01 | 8,45E-01 | C330002G04Rik | 1,64 | No  |
| ENSMUSG00000097933 | 2,26E+00  | -2,929348723 | 1,96E+00  | 1,61E-01 | 5,09E-01 | 1700039M10Rik | 4,79 | No  |
| ENSMUSG00000097934 | -8,78E-02 | -2,963255397 | 3,51E-03  | 9,53E-01 | 1,00E+00 | 6720483E21Rik | 0,94 | No  |
| ENSMUSG00000097935 | -3,74E-01 | -0,800852958 | 9,42E-01  | 3,32E-01 | 6,32E-01 | Gm3809        | 0,77 | No  |
| ENSMUSG00000097939 | -7,91E-02 | -1,998066093 | 1,46E-02  | 9,04E-01 | 1,00E+00 | Gm8601        | 0,95 | No  |
| ENSMUSG00000097942 | 1,87E+00  | -3,107639691 | 1,38E+00  | 2,40E-01 | 5,50E-01 | Gm26968       | 3,67 | No  |

|                    |           |              |          |          |          |               |      |     |
|--------------------|-----------|--------------|----------|----------|----------|---------------|------|-----|
| ENSMUSG00000097944 | -1,22E+00 | 0,211349754  | 1,72E+01 | 3,31E-05 | 9,53E-04 | A130014A01Rik | 0,43 | Yes |
| ENSMUSG00000097946 | -7,11E-02 | -2,832020055 | 2,17E-03 | 9,63E-01 | 1,00E+00 | Gm8343        | 0,95 | No  |
| ENSMUSG00000097948 | -1,89E+00 | -3,1076441   | 1,42E+00 | 2,33E-01 | 5,50E-01 | Gm21430       | 0,27 | No  |
| ENSMUSG00000097952 | 1,87E+00  | -3,107639691 | 1,38E+00 | 2,40E-01 | 5,50E-01 | Gm4398        | 3,67 | No  |
| ENSMUSG00000097954 | -2,40E-01 | 1,353538212  | 1,66E+00 | 1,97E-01 | 5,50E-01 | Gm4217        | 0,85 | No  |
| ENSMUSG00000097958 | -1,94E+00 | -3,107619243 | 1,50E+00 | 2,21E-01 | 5,50E-01 | Gm8492        | 0,26 | No  |
| ENSMUSG00000097960 | 1,82E-01  | -1,226285641 | 1,36E-01 | 7,13E-01 | 9,11E-01 | A330074K22Rik | 1,13 | No  |
| ENSMUSG00000097967 | 3,28E-01  | -2,146126271 | 1,98E-01 | 6,56E-01 | 8,80E-01 | Gm27002       | 1,26 | No  |
| ENSMUSG00000097971 | -8,42E-01 | 6,227233778  | 1,62E+02 | 4,43E-37 | 4,28E-34 | Gm26917       | 0,56 | Yes |
| ENSMUSG00000097973 | -1,04E+00 | -1,44843705  | 4,16E+00 | 4,13E-02 | 2,41E-01 | Gm4929        | 0,49 | No  |
| ENSMUSG00000097974 | 5,67E-01  | 0,966303107  | 7,05E+00 | 7,93E-03 | 7,85E-02 | Gm10605       | 1,48 | No  |
| ENSMUSG00000097977 | 1,85E+00  | -3,107657832 | 1,35E+00 | 2,46E-01 | 5,50E-01 | Gm5652        | 3,61 | No  |
| ENSMUSG00000097979 | 8,34E-02  | 4,34473671   | 1,01E+00 | 3,14E-01 | 6,14E-01 | Gm4691        | 1,06 | No  |
| ENSMUSG00000097983 | -9,75E-01 | -2,655121984 | 8,34E-01 | 3,61E-01 | 6,63E-01 | Gm26971       | 0,51 | No  |
| ENSMUSG00000097987 | -5,41E-01 | 0,658651109  | 5,37E+00 | 2,04E-02 | 1,54E-01 | Gm17786       | 0,69 | No  |
| ENSMUSG00000097988 | 1,12E+00  | -1,205936949 | 4,99E+00 | 2,55E-02 | 1,77E-01 | Gm10535       | 2,17 | No  |
| ENSMUSG00000097989 | 1,51E-01  | 2,4846678    | 1,37E+00 | 2,42E-01 | 5,50E-01 | Gm4335        | 1,11 | No  |
| ENSMUSG00000097990 | 1,61E-01  | 0,90158935   | 5,60E-01 | 4,54E-01 | 7,44E-01 | Gm19557       | 1,12 | No  |
| ENSMUSG00000097992 | -1,23E+00 | -3,146117124 | 7,12E-01 | 3,99E-01 | 6,98E-01 | Gm27016       | 0,42 | No  |
| ENSMUSG00000097993 | 3,12E-01  | 2,630590977  | 6,21E+00 | 1,27E-02 | 1,11E-01 | Ptprv         | 1,24 | No  |
| ENSMUSG00000097994 | -1,25E-01 | 3,242022181  | 1,36E+00 | 2,44E-01 | 5,50E-01 | Gm26982       | 0,92 | No  |
| ENSMUSG00000097995 | 1,61E+00  | -2,655165252 | 1,79E+00 | 1,81E-01 | 5,43E-01 | Gm24362       | 3,06 | No  |
| ENSMUSG00000097997 | 7,84E-01  | -1,497651643 | 1,89E+00 | 1,69E-01 | 5,24E-01 | Gm27017       | 1,72 | No  |
| ENSMUSG00000097998 | 3,13E+00  | -2,863761996 | 4,00E+00 | 4,54E-02 | 2,54E-01 | Gm27019       | 8,77 | No  |
| ENSMUSG00000097999 | 1,28E-01  | 0,666933058  | 3,01E-01 | 5,83E-01 | 8,38E-01 | Gm9061        | 1,09 | No  |
| ENSMUSG00000098000 | -3,08E-01 | -2,185648752 | 1,42E-01 | 7,06E-01 | 9,08E-01 | Gm27026       | 0,81 | No  |
| ENSMUSG00000098002 | -5,67E-02 | -2,896164696 | 1,45E-03 | 9,70E-01 | 1,00E+00 | Gm9658        | 0,96 | No  |
| ENSMUSG00000098003 | -1,89E+00 | -3,1076441   | 1,42E+00 | 2,33E-01 | 5,50E-01 | Gm6317        | 0,27 | No  |
| ENSMUSG00000098004 | 5,11E-02  | 0,920633293  | 5,85E-02 | 8,09E-01 | 9,65E-01 | Gm27027       | 1,04 | No  |
| ENSMUSG00000098006 | 1,36E-01  | 2,075777028  | 8,61E-01 | 3,53E-01 | 6,54E-01 | Gm8565        | 1,10 | No  |
| ENSMUSG00000098008 | -1,74E+00 | -2,711696806 | 2,12E+00 | 1,46E-01 | 4,83E-01 | A930001A20Rik | 0,30 | No  |
| ENSMUSG00000098009 | 4,52E-03  | 3,492156117  | 2,01E-03 | 9,64E-01 | 1,00E+00 | Gm5597        | 1,00 | No  |

|                    |           |              |           |          |          |               |      |     |
|--------------------|-----------|--------------|-----------|----------|----------|---------------|------|-----|
| ENSMUSG00000098019 | -1,53E-02 | 2,547303721  | 1,43E-02  | 9,05E-01 | 1,00E+00 | Gm2546        | 0,99 | No  |
| ENSMUSG00000098021 | -1,67E-01 | -1,448644935 | 8,76E-02  | 7,67E-01 | 9,40E-01 | Gm9522        | 0,89 | No  |
| ENSMUSG00000098022 | 6,75E-02  | 0,610044741  | 9,40E-02  | 7,59E-01 | 9,36E-01 | Zfp82         | 1,05 | No  |
| ENSMUSG00000098024 | 2,64E-01  | -1,413063807 | 2,54E-01  | 6,14E-01 | 8,53E-01 | Gm27003       | 1,20 | No  |
| ENSMUSG00000098026 | -1,70E+00 | -2,4486516   | 2,02E+00  | 1,55E-01 | 4,99E-01 | Gm27014       | 0,31 | No  |
| ENSMUSG00000098028 | 1,87E+00  | -2,96325898  | 1,36E+00  | 2,44E-01 | 5,50E-01 | Gm8824        | 3,66 | No  |
| ENSMUSG00000098031 | 1,85E+00  | -3,107657832 | 1,35E+00  | 2,46E-01 | 5,50E-01 | Gm9341        | 3,61 | No  |
| ENSMUSG00000098037 | 9,01E-03  | -3,107646452 | -5,16E-10 | 1,00E+00 | 1,00E+00 | Gm7765        | 1,01 | No  |
| ENSMUSG00000098039 | -1,39E+00 | -2,71173532  | 1,21E+00  | 2,72E-01 | 5,69E-01 | Gm26925       | 0,38 | No  |
| ENSMUSG00000098041 | -8,42E-01 | -2,14614615  | 1,03E+00  | 3,09E-01 | 6,08E-01 | Gm26981       | 0,56 | No  |
| ENSMUSG00000098043 | -1,25E+00 | -2,44862198  | 1,51E+00  | 2,20E-01 | 5,50E-01 | Gm26980       | 0,42 | No  |
| ENSMUSG00000098045 | 7,64E-01  | -2,548156491 | 3,15E-01  | 5,75E-01 | 8,34E-01 | Gm26979       | 1,70 | No  |
| ENSMUSG00000098048 | -1,87E+00 | -2,963257051 | 1,41E+00  | 2,35E-01 | 5,50E-01 | Gm8330        | 0,27 | No  |
| ENSMUSG00000098050 | 4,11E-01  | 3,232247927  | 1,47E+01  | 1,24E-04 | 2,90E-03 | Gm5345        | 1,33 | Yes |
| ENSMUSG00000098051 | 2,65E+00  | -3,033655087 | 2,73E+00  | 9,86E-02 | 3,91E-01 | Gm27032       | 6,30 | No  |
| ENSMUSG00000098052 | -1,89E+00 | -3,033648118 | 1,42E+00  | 2,33E-01 | 5,50E-01 | Gm5300        | 0,27 | No  |
| ENSMUSG00000098055 | 1,06E+00  | -1,627663362 | 3,37E+00  | 6,63E-02 | 3,23E-01 | Gm26947       | 2,08 | No  |
| ENSMUSG00000098056 | 1,85E+00  | -2,896137948 | 1,34E+00  | 2,47E-01 | 5,50E-01 | Gm8100        | 3,60 | No  |
| ENSMUSG00000098057 | -3,75E-01 | -2,448693341 | 1,78E-01  | 6,73E-01 | 8,90E-01 | Gm6283        | 0,77 | No  |
| ENSMUSG00000098062 | 9,08E-01  | -1,033597747 | 4,26E+00  | 3,89E-02 | 2,34E-01 | Gm26931       | 1,88 | No  |
| ENSMUSG00000098066 | -1,34E-01 | 0,658876867  | 3,25E-01  | 5,69E-01 | 8,30E-01 | Gm26944       | 0,91 | No  |
| ENSMUSG00000098067 | 4,10E-01  | -0,896277234 | 9,27E-01  | 3,36E-01 | 6,37E-01 | Gm26943       | 1,33 | No  |
| ENSMUSG00000098068 | 1,16E-01  | -2,033609613 | 2,64E-02  | 8,71E-01 | 1,00E+00 | Gm7909        | 1,08 | No  |
| ENSMUSG00000098071 | -5,49E-02 | -2,448608256 | 3,46E-03  | 9,53E-01 | 1,00E+00 | Gm44525       | 0,96 | No  |
| ENSMUSG00000098074 | -2,66E+00 | -2,96323193  | 2,82E+00  | 9,29E-02 | 3,83E-01 | Gm26993       | 0,16 | No  |
| ENSMUSG00000098076 | 8,98E-01  | -0,879971401 | 3,65E+00  | 5,62E-02 | 2,91E-01 | Gm6981        | 1,86 | No  |
| ENSMUSG00000098082 | -2,27E+00 | -2,31116179  | 4,22E+00  | 4,00E-02 | 2,38E-01 | Gm20574       | 0,21 | No  |
| ENSMUSG00000098083 | -1,90E+00 | -3,033647263 | 1,44E+00  | 2,30E-01 | 5,50E-01 | Gm8957        | 0,27 | No  |
| ENSMUSG00000098088 | 6,24E-01  | -0,778292779 | 2,47E+00  | 1,16E-01 | 4,21E-01 | Gm26916       | 1,54 | No  |
| ENSMUSG00000098089 | -1,94E+00 | -3,107619243 | 1,50E+00  | 2,21E-01 | 5,50E-01 | Gm26915       | 0,26 | No  |
| ENSMUSG00000098090 | 2,72E-01  | 2,606749826  | 4,84E+00  | 2,79E-02 | 1,88E-01 | 2700099C18Rik | 1,21 | No  |
| ENSMUSG00000098091 | 7,21E-02  | 1,819261104  | 2,04E-01  | 6,51E-01 | 8,77E-01 | Gm16470       | 1,05 | No  |

|                    |           |              |          |          |          |               |      |    |
|--------------------|-----------|--------------|----------|----------|----------|---------------|------|----|
| ENSMUSG00000098092 | -3,28E-01 | -2,311175711 | 1,61E-01 | 6,88E-01 | 8,98E-01 | Gm2076        | 0,80 | No |
| ENSMUSG00000098098 | 4,73E-02  | 0,616261477  | 3,71E-02 | 8,47E-01 | 9,87E-01 | Bvht          | 1,03 | No |
| ENSMUSG00000098100 | -2,69E+00 | -2,963207085 | 2,87E+00 | 9,01E-02 | 3,80E-01 | Gm7572        | 0,16 | No |
| ENSMUSG00000098101 | -2,28E-01 | -0,831917106 | 2,55E-01 | 6,13E-01 | 8,53E-01 | Gm27006       | 0,85 | No |
| ENSMUSG00000098102 | 2,65E+00  | -3,033655087 | 2,73E+00 | 9,86E-02 | 3,91E-01 | Gm2467        | 6,30 | No |
| ENSMUSG00000098104 | -1,76E-01 | 6,013901345  | 7,24E+00 | 7,12E-03 | 7,27E-02 | Gm6085        | 0,89 | No |
| ENSMUSG00000098105 | -2,28E+00 | -2,548200841 | 4,22E+00 | 3,99E-02 | 2,37E-01 | Gm8825        | 0,21 | No |
| ENSMUSG00000098107 | -1,23E+00 | -3,146117124 | 7,12E-01 | 3,99E-01 | 6,98E-01 | Gm27007       | 0,42 | No |
| ENSMUSG00000098108 | 6,03E-01  | 0,794016938  | 6,81E+00 | 9,09E-03 | 8,70E-02 | Gm27008       | 1,52 | No |
| ENSMUSG00000098109 | -1,86E+00 | -3,033612668 | 1,39E+00 | 2,38E-01 | 5,50E-01 | 9530085P06Rik | 0,28 | No |
| ENSMUSG00000098111 | 6,46E-02  | 4,780060435  | 7,07E-01 | 4,01E-01 | 6,99E-01 | Gm4654        | 1,05 | No |
| ENSMUSG00000098112 | 1,06E-01  | 6,362560168  | 2,79E+00 | 9,50E-02 | 3,86E-01 | Bin2          | 1,08 | No |
| ENSMUSG00000098113 | 8,56E-03  | 4,262860416  | 1,05E-02 | 9,18E-01 | 1,00E+00 | Gm2445        | 1,01 | No |
| ENSMUSG00000098120 | 1,60E-01  | -0,350082496 | 2,41E-01 | 6,23E-01 | 8,58E-01 | Gm5914        | 1,12 | No |
| ENSMUSG00000098121 | 4,44E-03  | -0,847859959 | 1,27E-04 | 9,91E-01 | 1,00E+00 | Gm27038       | 1,00 | No |
| ENSMUSG00000098123 | 8,05E-02  | 3,835197543  | 7,83E-01 | 3,76E-01 | 6,77E-01 | Gm4518        | 1,06 | No |
| ENSMUSG00000098127 | -6,29E-01 | -2,355637017 | 5,39E-01 | 4,63E-01 | 7,52E-01 | Gm4665        | 0,65 | No |
| ENSMUSG00000098132 | -1,87E+00 | -3,107637761 | 1,39E+00 | 2,38E-01 | 5,50E-01 | Rassf10       | 0,27 | No |
| ENSMUSG00000098134 | -1,09E-01 | 3,971853156  | 1,47E+00 | 2,26E-01 | 5,50E-01 | Rnf113a2      | 0,93 | No |
| ENSMUSG00000098135 | -1,87E+00 | -3,107637761 | 1,39E+00 | 2,38E-01 | 5,50E-01 | Gm6946        | 0,27 | No |
| ENSMUSG00000098136 | 1,81E+00  | -3,10765737  | 1,28E+00 | 2,58E-01 | 5,50E-01 | Gm8513        | 3,49 | No |
| ENSMUSG00000098138 | 1,89E+00  | -3,033614598 | 1,38E+00 | 2,40E-01 | 5,50E-01 | Gm9081        | 3,70 | No |
| ENSMUSG00000098140 | -1,43E-01 | 0,982118605  | 4,70E-01 | 4,93E-01 | 7,79E-01 | Gm26938       | 0,91 | No |
| ENSMUSG00000098141 | 8,19E-01  | -2,711736363 | 5,84E-01 | 4,45E-01 | 7,36E-01 | Gm6944        | 1,76 | No |
| ENSMUSG00000098142 | 4,04E-01  | -1,033689874 | 8,45E-01 | 3,58E-01 | 6,59E-01 | Gm7507        | 1,32 | No |
| ENSMUSG00000098144 | -1,20E+00 | -1,561166135 | 5,39E+00 | 2,02E-02 | 1,52E-01 | 1700029N11Rik | 0,44 | No |
| ENSMUSG00000098145 | -2,59E-01 | -2,800996375 | 5,59E-02 | 8,13E-01 | 9,67E-01 | Gm26936       | 0,84 | No |
| ENSMUSG00000098146 | -1,85E-01 | -1,63685958  | 1,10E-01 | 7,40E-01 | 9,26E-01 | Gm26935       | 0,88 | No |
| ENSMUSG00000098149 | -1,78E+00 | -2,831957397 | 2,22E+00 | 1,37E-01 | 4,66E-01 | Gapdh-ps14    | 0,29 | No |
| ENSMUSG00000098154 | -5,75E-01 | -1,683049487 | 9,13E-01 | 3,39E-01 | 6,40E-01 | Gm5787        | 0,67 | No |
| ENSMUSG00000098155 | -1,13E+00 | -2,929270806 | 7,54E-01 | 3,85E-01 | 6,86E-01 | Gm27022       | 0,46 | No |
| ENSMUSG00000098156 | -7,78E-02 | -2,896145798 | 2,63E-03 | 9,59E-01 | 1,00E+00 | Gm27023       | 0,95 | No |

|                    |           |              |           |          |          |               |      |     |
|--------------------|-----------|--------------|-----------|----------|----------|---------------|------|-----|
| ENSMUSG00000098158 | -4,43E-01 | -2,548235785 | 2,01E-01  | 6,54E-01 | 8,79E-01 | Gm4804        | 0,74 | No  |
| ENSMUSG00000098164 | -1,86E+00 | -3,033612668 | 1,39E+00  | 2,38E-01 | 5,50E-01 | Gm5493        | 0,28 | No  |
| ENSMUSG00000098166 | -1,94E+00 | -3,107619243 | 1,50E+00  | 2,21E-01 | 5,50E-01 | Gm26978       | 0,26 | No  |
| ENSMUSG00000098176 | -7,41E-02 | 1,331026263  | 1,58E-01  | 6,91E-01 | 8,99E-01 | Ccdc166       | 0,95 | No  |
| ENSMUSG00000098178 | -5,52E-01 | 8,937957974  | 9,14E+01  | 1,17E-21 | 3,11E-19 | Gm42418       | 0,68 | Yes |
| ENSMUSG00000098180 | 9,71E-01  | -1,40152584  | 3,41E+00  | 6,48E-02 | 3,19E-01 | Gm5430        | 1,96 | No  |
| ENSMUSG00000098181 | 2,64E-02  | 4,914526502  | 1,25E-01  | 7,24E-01 | 9,17E-01 | Rps12-ps24    | 1,02 | No  |
| ENSMUSG00000098183 | -1,45E-01 | -0,863624344 | 1,10E-01  | 7,40E-01 | 9,26E-01 | Gm27010       | 0,90 | No  |
| ENSMUSG00000098184 | 2,68E-01  | -1,963311408 | 1,49E-01  | 7,00E-01 | 9,04E-01 | Gm27011       | 1,20 | No  |
| ENSMUSG00000098186 | -2,71E+00 | -3,033620915 | 2,92E+00  | 8,75E-02 | 3,78E-01 | Gm7132        | 0,15 | No  |
| ENSMUSG00000098187 | -5,79E-02 | -2,711710222 | 2,27E-03  | 9,62E-01 | 1,00E+00 | Gm8927        | 0,96 | No  |
| ENSMUSG00000098188 | -1,48E-01 | 5,642778664  | 4,81E+00  | 2,84E-02 | 1,91E-01 | Sowahc        | 0,90 | No  |
| ENSMUSG00000098190 | 1,87E+00  | -3,107639691 | 1,38E+00  | 2,40E-01 | 5,50E-01 | Gm5210        | 3,67 | No  |
| ENSMUSG00000098191 | 4,24E-02  | -3,033592245 | -1,17E-09 | 1,00E+00 | 1,00E+00 | Gm26962       | 1,03 | No  |
| ENSMUSG00000098192 | 2,62E-02  | 4,674795971  | 1,14E-01  | 7,36E-01 | 9,24E-01 | Gm3534        | 1,02 | No  |
| ENSMUSG00000098194 | -1,87E+00 | -3,107637761 | 1,39E+00  | 2,38E-01 | 5,50E-01 | Gm7286        | 0,27 | No  |
| ENSMUSG00000098196 | 2,46E-01  | 1,646842562  | 2,21E+00  | 1,37E-01 | 4,67E-01 | Gm26964       | 1,19 | No  |
| ENSMUSG00000098197 | -4,38E-01 | 2,342790673  | 1,06E+01  | 1,12E-03 | 1,77E-02 | BC051537      | 0,74 | Yes |
| ENSMUSG00000098198 | -7,07E-02 | 4,33850636   | 7,24E-01  | 3,95E-01 | 6,95E-01 | Gm9169        | 0,95 | No  |
| ENSMUSG00000098199 | 2,66E+00  | -2,896120683 | 2,73E+00  | 9,86E-02 | 3,91E-01 | Gm9358        | 6,32 | No  |
| ENSMUSG00000098201 | -1,89E+00 | -3,1076441   | 1,42E+00  | 2,33E-01 | 5,50E-01 | Gm26983       | 0,27 | No  |
| ENSMUSG00000098203 | 1,24E+00  | -2,896169311 | 9,54E-01  | 3,29E-01 | 6,29E-01 | Gm9568        | 2,36 | No  |
| ENSMUSG00000098204 | 1,85E+00  | -3,107657832 | 1,35E+00  | 2,46E-01 | 5,50E-01 | Gm26984       | 3,61 | No  |
| ENSMUSG00000098206 | 7,70E-01  | 0,146485588  | 7,75E+00  | 5,36E-03 | 5,88E-02 | A430106G13Rik | 1,71 | No  |
| ENSMUSG00000098207 | -5,78E-02 | -2,896131211 | 2,23E-03  | 9,62E-01 | 1,00E+00 | Arl14         | 0,96 | No  |
| ENSMUSG00000098208 | 1,40E-01  | 1,972593164  | 9,05E-01  | 3,41E-01 | 6,42E-01 | Gm8349        | 1,10 | No  |
| ENSMUSG00000098210 | -2,42E-01 | 1,337690519  | 1,83E+00  | 1,76E-01 | 5,34E-01 | Gm5224        | 0,85 | No  |
| ENSMUSG00000098211 | 3,18E+00  | -2,863691173 | 4,12E+00  | 4,25E-02 | 2,45E-01 | Gm27045       | 9,05 | No  |
| ENSMUSG00000098222 | -1,58E+00 | -1,627654485 | 7,73E+00  | 5,45E-03 | 5,95E-02 | Gm8318        | 0,33 | No  |
| ENSMUSG00000098224 | 4,26E-01  | -0,042419198 | 1,74E+00  | 1,88E-01 | 5,50E-01 | Gm7985        | 1,34 | No  |
| ENSMUSG00000098230 | 1,22E+00  | -3,107637583 | 6,82E-01  | 4,09E-01 | 7,05E-01 | 1700095B10Rik | 2,33 | No  |
| ENSMUSG00000098232 | 8,38E-01  | -2,497625644 | 6,11E-01  | 4,35E-01 | 7,27E-01 | Gm3671        | 1,79 | No  |

|                    |           |              |          |          |          |               |      |     |
|--------------------|-----------|--------------|----------|----------|----------|---------------|------|-----|
| ENSMUSG00000098234 | -3,22E-01 | 2,487108211  | 5,98E+00 | 1,45E-02 | 1,23E-01 | Snhg6         | 0,80 | No  |
| ENSMUSG00000098235 | 1,06E+00  | -2,4487254   | 1,45E+00 | 2,29E-01 | 5,50E-01 | Gm7497        | 2,09 | No  |
| ENSMUSG00000098237 | 1,21E-02  | -3,033650469 | 7,34E-11 | 1,00E+00 | 1,00E+00 | Gm7577        | 1,01 | No  |
| ENSMUSG00000098238 | -7,82E-01 | -1,522639229 | 1,81E+00 | 1,79E-01 | 5,39E-01 | Gm8756        | 0,58 | No  |
| ENSMUSG00000098240 | -1,57E-01 | 1,897562308  | 1,05E+00 | 3,06E-01 | 6,04E-01 | Gm4575        | 0,90 | No  |
| ENSMUSG00000098241 | 1,01E+00  | -3,033653472 | 4,36E-01 | 5,09E-01 | 7,92E-01 | H2-Pa         | 2,02 | No  |
| ENSMUSG00000098243 | 8,86E-01  | -0,466740511 | 5,40E+00 | 2,01E-02 | 1,52E-01 | Gm4258        | 1,85 | No  |
| ENSMUSG00000098245 | 1,81E+00  | -3,10765737  | 1,28E+00 | 2,58E-01 | 5,50E-01 | Gm26927       | 3,49 | No  |
| ENSMUSG00000098248 | -1,87E+00 | -3,033619006 | 1,41E+00 | 2,36E-01 | 5,50E-01 | Gm27222       | 0,27 | No  |
| ENSMUSG00000098251 | -1,90E+00 | -3,033647263 | 1,44E+00 | 2,30E-01 | 5,50E-01 | Mir7656       | 0,27 | No  |
| ENSMUSG00000098253 | -6,37E-01 | -1,097945753 | 1,96E+00 | 1,62E-01 | 5,12E-01 | Mir7219       | 0,64 | No  |
| ENSMUSG00000098255 | 8,62E-02  | -1,428790541 | 2,47E-02 | 8,75E-01 | 1,00E+00 | Gm27223       | 1,06 | No  |
| ENSMUSG00000098259 | -7,31E-02 | -0,236523974 | 5,02E-02 | 8,23E-01 | 9,73E-01 | Gm27616       | 0,95 | No  |
| ENSMUSG00000098263 | 2,84E-02  | -2,07021559  | 1,45E-03 | 9,70E-01 | 1,00E+00 | Mir6938       | 1,02 | No  |
| ENSMUSG00000098265 | 1,51E-01  | 1,941204722  | 9,75E-01 | 3,23E-01 | 6,24E-01 | Gm27517       | 1,11 | No  |
| ENSMUSG00000098266 | 1,15E+00  | -1,66911767  | 4,08E+00 | 4,35E-02 | 2,48E-01 | Gm27516       | 2,21 | No  |
| ENSMUSG00000098267 | -1,48E-01 | -0,44268771  | 1,93E-01 | 6,60E-01 | 8,82E-01 | Mir7060       | 0,90 | No  |
| ENSMUSG00000098268 | -5,57E-01 | -2,71174244  | 2,43E-01 | 6,22E-01 | 8,58E-01 | Gm27514       | 0,68 | No  |
| ENSMUSG00000098269 | -1,66E-01 | 3,152155311  | 2,33E+00 | 1,27E-01 | 4,46E-01 | Mir8094       | 0,89 | No  |
| ENSMUSG00000098270 | 5,05E-01  | -0,088754309 | 2,47E+00 | 1,16E-01 | 4,21E-01 | Gm27221       | 1,42 | No  |
| ENSMUSG00000098274 | -4,81E-01 | 2,663138443  | 1,51E+01 | 1,01E-04 | 2,44E-03 | Rpl24         | 0,72 | Yes |
| ENSMUSG00000098275 | 4,79E-01  | -0,600874366 | 1,67E+00 | 1,96E-01 | 5,50E-01 | Gm18014       | 1,39 | No  |
| ENSMUSG00000098279 | 3,27E-01  | -1,278809618 | 4,27E-01 | 5,14E-01 | 7,96E-01 | Mir6908       | 1,25 | No  |
| ENSMUSG00000098280 | -7,11E-02 | -2,83201095  | 3,45E-03 | 9,53E-01 | 1,00E+00 | Mir7687       | 0,95 | No  |
| ENSMUSG00000098281 | -9,63E-02 | 5,752435061  | 2,06E+00 | 1,51E-01 | 4,93E-01 | Gm27529       | 0,94 | No  |
| ENSMUSG00000098282 | 1,05E-03  | 1,0810932    | 2,64E-05 | 9,96E-01 | 1,00E+00 | Mir6936       | 1,00 | No  |
| ENSMUSG00000098284 | -4,58E-01 | -2,998009068 | 1,03E-01 | 7,48E-01 | 9,30E-01 | A330093E20Rik | 0,73 | No  |
| ENSMUSG00000098285 | -6,92E-02 | -0,349724325 | 4,23E-02 | 8,37E-01 | 9,81E-01 | Mir7670       | 0,95 | No  |
| ENSMUSG00000098286 | -4,22E-01 | -0,289384363 | 1,40E+00 | 2,37E-01 | 5,50E-01 | Mir8091       | 0,75 | No  |
| ENSMUSG00000098288 | -7,04E-01 | -1,863685222 | 9,88E-01 | 3,20E-01 | 6,21E-01 | Mir6900       | 0,61 | No  |
| ENSMUSG00000098291 | -3,25E-01 | -1,344238245 | 3,77E-01 | 5,39E-01 | 8,10E-01 | Mir6973a      | 0,80 | No  |
| ENSMUSG00000098292 | 1,12E-01  | 4,114548789  | 1,64E+00 | 2,00E-01 | 5,50E-01 | Gm27194       | 1,08 | No  |



|                    |           |              |          |          |          |               |      |    |
|--------------------|-----------|--------------|----------|----------|----------|---------------|------|----|
| ENSMUSG00000098293 | -9,21E-01 | -2,740870691 | 6,03E-01 | 4,37E-01 | 7,30E-01 | Mir6991       | 0,53 | No |
| ENSMUSG00000098296 | -1,24E+00 | -2,997988891 | 7,19E-01 | 3,96E-01 | 6,97E-01 | Mir6918       | 0,42 | No |
| ENSMUSG00000098297 | -8,46E-01 | -2,896113927 | 3,93E-01 | 5,31E-01 | 8,05E-01 | Mir6980       | 0,56 | No |
| ENSMUSG00000098302 | 1,59E-01  | -1,300218427 | 9,89E-02 | 7,53E-01 | 9,33E-01 | Gm28039       | 1,12 | No |
| ENSMUSG00000098304 | -5,69E-02 | -3,107638538 | 1,33E-03 | 9,71E-01 | 1,00E+00 | 1700027I24Rik | 0,96 | No |
| ENSMUSG00000098305 | -1,94E+00 | -3,107619243 | 1,50E+00 | 2,21E-01 | 5,50E-01 | Gm27781       | 0,26 | No |
| ENSMUSG00000098306 | -1,27E+00 | -3,146104694 | 7,49E-01 | 3,87E-01 | 6,87E-01 | Gm28040       | 0,42 | No |
| ENSMUSG00000098309 | -5,26E-01 | -1,246961632 | 1,36E+00 | 2,44E-01 | 5,50E-01 | Gtpbp4-ps2    | 0,69 | No |
| ENSMUSG00000098316 | -7,90E-01 | -1,600766503 | 2,41E+00 | 1,20E-01 | 4,32E-01 | Mir7683       | 0,58 | No |
| ENSMUSG00000098317 | -4,00E-01 | -2,185602311 | 2,68E-01 | 6,05E-01 | 8,49E-01 | Mir6926       | 0,76 | No |
| ENSMUSG00000098318 | -9,70E-02 | 1,60866836   | 3,38E-01 | 5,61E-01 | 8,24E-01 | Lockd         | 0,93 | No |
| ENSMUSG00000098319 | 1,04E-01  | 0,712967709  | 2,15E-01 | 6,43E-01 | 8,72E-01 | Mir7038       | 1,07 | No |
| ENSMUSG00000098320 | 7,64E-01  | -0,712000423 | 3,58E+00 | 5,83E-02 | 2,98E-01 | Vis1          | 1,70 | No |
| ENSMUSG00000098325 | -2,75E-01 | -1,548348797 | 2,64E-01 | 6,07E-01 | 8,50E-01 | Mir7048       | 0,83 | No |
| ENSMUSG00000098327 | 8,39E-02  | 1,709501442  | 2,44E-01 | 6,21E-01 | 8,57E-01 | Mir7087       | 1,06 | No |
| ENSMUSG00000098328 | -3,56E+00 | -2,711592729 | 5,70E+00 | 1,70E-02 | 1,36E-01 | Gm27271       | 0,08 | No |
| ENSMUSG00000098329 | -1,64E-01 | -2,015734856 | 5,46E-02 | 8,15E-01 | 9,69E-01 | Mir6966       | 0,89 | No |
| ENSMUSG00000098330 | -1,17E+00 | -1,832004335 | 2,24E+00 | 1,34E-01 | 4,61E-01 | Gtpbp4-ps1    | 0,44 | No |
| ENSMUSG00000098331 | 7,78E-02  | 0,273921572  | 8,25E-02 | 7,74E-01 | 9,44E-01 | Mir7069       | 1,06 | No |
| ENSMUSG00000098332 | 6,89E-02  | 2,089689403  | 2,23E-01 | 6,37E-01 | 8,68E-01 | 2310009A05Rik | 1,05 | No |
| ENSMUSG00000098334 | -1,50E-01 | -1,289361065 | 8,99E-02 | 7,64E-01 | 9,39E-01 | Mir7043       | 0,90 | No |
| ENSMUSG00000098338 | -2,79E-01 | -2,146060119 | 1,35E-01 | 7,14E-01 | 9,12E-01 | Mir6941       | 0,82 | No |
| ENSMUSG00000098339 | -1,62E-01 | -2,165727828 | 5,02E-02 | 8,23E-01 | 9,73E-01 | Mir6977       | 0,89 | No |
| ENSMUSG00000098340 | 1,17E+00  | -3,14612376  | 6,40E-01 | 4,24E-01 | 7,18E-01 | Gm27253       | 2,26 | No |
| ENSMUSG00000098341 | 1,02E+00  | -2,226303094 | 1,51E+00 | 2,19E-01 | 5,50E-01 | Mir6944       | 2,03 | No |
| ENSMUSG00000098342 | -1,27E+00 | -3,146104694 | 7,49E-01 | 3,87E-01 | 6,87E-01 | Gm27849       | 0,42 | No |
| ENSMUSG00000098344 | 1,23E+00  | -2,770636176 | 9,38E-01 | 3,33E-01 | 6,33E-01 | Mir3473f      | 2,35 | No |
| ENSMUSG00000098346 | -4,85E-02 | -1,042776924 | 1,14E-02 | 9,15E-01 | 1,00E+00 | Mir6986       | 0,97 | No |
| ENSMUSG00000098349 | -1,89E+00 | -3,1076441   | 1,42E+00 | 2,33E-01 | 5,50E-01 | Gm27711       | 0,27 | No |
| ENSMUSG00000098353 | -5,11E-01 | -0,029006787 | 2,98E+00 | 8,43E-02 | 3,72E-01 | Mir7057       | 0,70 | No |
| ENSMUSG00000098355 | 1,09E+00  | -2,472956112 | 1,32E+00 | 2,50E-01 | 5,50E-01 | Gm27553       | 2,13 | No |
| ENSMUSG00000098359 | -2,97E-01 | 0,281081267  | 1,30E+00 | 2,54E-01 | 5,50E-01 | Mir7649       | 0,81 | No |

|                    |           |              |          |          |          |            |      |    |
|--------------------|-----------|--------------|----------|----------|----------|------------|------|----|
| ENSMUSG00000098361 | -1,07E-01 | -0,221121162 | 1,15E-01 | 7,35E-01 | 9,24E-01 | Mir7086    | 0,93 | No |
| ENSMUSG00000098362 | 7,29E-01  | -1,070365995 | 2,51E+00 | 1,13E-01 | 4,14E-01 | Mir130c    | 1,66 | No |
| ENSMUSG00000098363 | -4,46E-02 | -2,655107387 | 1,59E-03 | 9,68E-01 | 1,00E+00 | Mir6993    | 0,97 | No |
| ENSMUSG00000098364 | -4,42E-02 | 1,753145992  | 7,62E-02 | 7,83E-01 | 9,50E-01 | Gm27646    | 0,97 | No |
| ENSMUSG00000098367 | 1,54E-01  | -1,12676291  | 1,11E-01 | 7,39E-01 | 9,26E-01 | Gm27645    | 1,11 | No |
| ENSMUSG00000098369 | -1,84E-01 | 2,071956311  | 1,53E+00 | 2,16E-01 | 5,50E-01 | Gm2274     | 0,88 | No |
| ENSMUSG00000098371 | -3,58E-01 | 2,426104448  | 7,40E+00 | 6,54E-03 | 6,83E-02 | Gm28037    | 0,78 | No |
| ENSMUSG00000098374 | -1,08E-01 | 5,670782475  | 2,56E+00 | 1,10E-01 | 4,06E-01 | Gm28043    | 0,93 | No |
| ENSMUSG00000098376 | -4,57E-01 | -1,755658781 | 5,79E-01 | 4,47E-01 | 7,37E-01 | Mir6907    | 0,73 | No |
| ENSMUSG00000098380 | 7,29E-02  | 1,404237161  | 1,63E-01 | 6,86E-01 | 8,97E-01 | Mir6939    | 1,05 | No |
| ENSMUSG00000098381 | -5,87E-01 | -2,20586106  | 6,11E-01 | 4,34E-01 | 7,27E-01 | Mir7225    | 0,67 | No |
| ENSMUSG00000098382 | -3,73E-01 | -1,770576763 | 3,38E-01 | 5,61E-01 | 8,24E-01 | Gtpbp4-ps4 | 0,77 | No |
| ENSMUSG00000098385 | -4,70E-02 | -2,896174177 | 1,41E-03 | 9,70E-01 | 1,00E+00 | Gm27500    | 0,97 | No |
| ENSMUSG00000098387 | 1,64E-01  | 2,445213396  | 1,54E+00 | 2,15E-01 | 5,50E-01 | Pet117     | 1,12 | No |
| ENSMUSG00000098388 | -1,15E+00 | -2,9980091   | 5,77E-01 | 4,47E-01 | 7,38E-01 | Mir8109    | 0,45 | No |
| ENSMUSG00000098389 | 3,95E-02  | 3,218147517  | 1,34E-01 | 7,14E-01 | 9,12E-01 | Mir6983    | 1,03 | No |
| ENSMUSG00000098396 | 1,84E+00  | -2,120622281 | 4,80E+00 | 2,85E-02 | 1,91E-01 | Gm27997    | 3,59 | No |
| ENSMUSG00000098397 | 1,33E+00  | -2,033746265 | 3,12E+00 | 7,73E-02 | 3,55E-01 | Mir7669    | 2,51 | No |
| ENSMUSG00000098399 | 1,07E-01  | 0,29887583   | 1,72E-01 | 6,79E-01 | 8,93E-01 | Gm27995    | 1,08 | No |
| ENSMUSG00000098403 | -1,57E-01 | -1,946286298 | 4,73E-02 | 8,28E-01 | 9,76E-01 | Gm27415    | 0,90 | No |
| ENSMUSG00000098404 | -9,40E-02 | 4,599786584  | 1,41E+00 | 2,34E-01 | 5,50E-01 | Mrip-ps    | 0,94 | No |
| ENSMUSG00000098410 | 5,66E-01  | -1,641346886 | 8,75E-01 | 3,50E-01 | 6,51E-01 | Mir1957b   | 1,48 | No |
| ENSMUSG00000098412 | -3,95E-02 | -2,548216151 | 1,44E-03 | 9,70E-01 | 1,00E+00 | Gm7870     | 0,97 | No |
| ENSMUSG00000098413 | -6,73E-02 | 0,191358071  | 6,42E-02 | 8,00E-01 | 9,60E-01 | Mir6990    | 0,95 | No |
| ENSMUSG00000098414 | 7,87E-02  | -0,305841823 | 5,52E-02 | 8,14E-01 | 9,68E-01 | Mir6909    | 1,06 | No |
| ENSMUSG00000098415 | 3,20E-01  | -0,690250642 | 6,27E-01 | 4,28E-01 | 7,22E-01 | Mir6928    | 1,25 | No |
| ENSMUSG00000098416 | 1,39E-01  | -1,472837212 | 6,74E-02 | 7,95E-01 | 9,57E-01 | Mir7117    | 1,10 | No |
| ENSMUSG00000098419 | 1,27E-01  | -1,311174185 | 5,81E-02 | 8,10E-01 | 9,65E-01 | Mir6963    | 1,09 | No |
| ENSMUSG00000098421 | 3,38E-01  | -0,561178989 | 7,66E-01 | 3,81E-01 | 6,83E-01 | Gm27190    | 1,26 | No |
| ENSMUSG00000098422 | 4,99E-01  | -1,816439387 | 5,55E-01 | 4,56E-01 | 7,46E-01 | Mir7016    | 1,41 | No |
| ENSMUSG00000098425 | -1,90E+00 | -3,033594154 | 1,44E+00 | 2,30E-01 | 5,50E-01 | Gm24949    | 0,27 | No |
| ENSMUSG00000098426 | 1,96E-01  | -1,912675964 | 8,20E-02 | 7,75E-01 | 9,45E-01 | Gm27149    | 1,15 | No |

|                    |           |              |          |          |          |               |      |     |
|--------------------|-----------|--------------|----------|----------|----------|---------------|------|-----|
| ENSMUSG00000098428 | 2,41E-01  | 2,610942585  | 3,49E+00 | 6,17E-02 | 3,09E-01 | Gm2260        | 1,18 | No  |
| ENSMUSG00000098430 | -3,11E-01 | -1,731334957 | 2,36E-01 | 6,27E-01 | 8,61E-01 | Gm27494       | 0,81 | No  |
| ENSMUSG00000098431 | -1,10E+00 | -2,711707391 | 9,06E-01 | 3,41E-01 | 6,42E-01 | Mir7666       | 0,47 | No  |
| ENSMUSG00000098434 | -3,79E-02 | -2,655133131 | 1,29E-03 | 9,71E-01 | 1,00E+00 | 2010110E17Rik | 0,97 | No  |
| ENSMUSG00000098439 | -1,70E+00 | -2,401340381 | 2,01E+00 | 1,56E-01 | 5,00E-01 | Hm629797      | 0,31 | No  |
| ENSMUSG00000098441 | 5,91E-01  | -3,033645653 | 1,39E-01 | 7,09E-01 | 9,09E-01 | Mir6537       | 1,51 | No  |
| ENSMUSG00000098442 | 3,17E-01  | -0,719103026 | 6,66E-01 | 4,14E-01 | 7,10E-01 | Mir6959       | 1,25 | No  |
| ENSMUSG00000098445 | 5,62E-03  | -1,165469028 | 1,39E-04 | 9,91E-01 | 1,00E+00 | Mir6972       | 1,00 | No  |
| ENSMUSG00000098447 | 2,02E-01  | 1,360487268  | 1,18E+00 | 2,78E-01 | 5,74E-01 | Gm27184       | 1,15 | No  |
| ENSMUSG00000098448 | 1,85E+00  | -3,107657832 | 1,35E+00 | 2,46E-01 | 5,50E-01 | Mir6362       | 3,61 | No  |
| ENSMUSG00000098449 | -3,89E-01 | -2,205827549 | 1,73E-01 | 6,78E-01 | 8,92E-01 | Gm7467        | 0,76 | No  |
| ENSMUSG00000098451 | 1,70E-01  | -1,175620233 | 1,27E-01 | 7,21E-01 | 9,16E-01 | Mir6952       | 1,12 | No  |
| ENSMUSG00000098452 | 1,87E+00  | -3,107639691 | 1,38E+00 | 2,40E-01 | 5,50E-01 | Gm27501       | 3,67 | No  |
| ENSMUSG00000098453 | 9,57E-02  | 0,925048659  | 2,16E-01 | 6,42E-01 | 8,71E-01 | Mir6997       | 1,07 | No  |
| ENSMUSG00000098454 | -3,78E-01 | -2,355600729 | 1,80E-01 | 6,72E-01 | 8,89E-01 | Mir7032       | 0,77 | No  |
| ENSMUSG00000098457 | 2,77E-01  | -0,294894821 | 7,47E-01 | 3,87E-01 | 6,87E-01 | Mir8097       | 1,21 | No  |
| ENSMUSG00000098458 | -2,66E-01 | -0,574098185 | 5,53E-01 | 4,57E-01 | 7,46E-01 | Mir6971       | 0,83 | No  |
| ENSMUSG00000098460 | -3,61E-02 | 0,445248144  | 1,91E-02 | 8,90E-01 | 1,00E+00 | Mir6970       | 0,98 | No  |
| ENSMUSG00000098462 | -3,29E-01 | 4,598686634  | 1,69E+01 | 4,03E-05 | 1,13E-03 | Gm27694       | 0,80 | Yes |
| ENSMUSG00000098464 | -3,57E-01 | -2,015734436 | 2,43E-01 | 6,22E-01 | 8,58E-01 | Mir7002       | 0,78 | No  |
| ENSMUSG00000098465 | -6,17E-02 | 1,954730584  | 1,54E-01 | 6,95E-01 | 9,02E-01 | Mir1668       | 0,96 | No  |
| ENSMUSG00000098468 | -1,09E+00 | -2,655068238 | 8,96E-01 | 3,44E-01 | 6,44E-01 | Gm27186       | 0,47 | No  |
| ENSMUSG00000098470 | -1,21E-01 | 1,387486078  | 4,06E-01 | 5,24E-01 | 8,01E-01 | C1rb          | 0,92 | No  |
| ENSMUSG00000098473 | -1,51E+00 | -2,963241647 | 1,08E+00 | 3,00E-01 | 5,96E-01 | Mir7083       | 0,35 | No  |
| ENSMUSG00000098474 | 4,75E-02  | -0,252324664 | 2,23E-02 | 8,81E-01 | 1,00E+00 | Mir6919       | 1,03 | No  |
| ENSMUSG00000098477 | -1,87E+00 | -3,107637761 | 1,39E+00 | 2,38E-01 | 5,50E-01 | Gm27853       | 0,27 | No  |
| ENSMUSG00000098480 | 1,85E+00  | -3,107657832 | 1,35E+00 | 2,46E-01 | 5,50E-01 | Mir6387       | 3,61 | No  |
| ENSMUSG00000098482 | 3,80E-01  | 0,351647214  | 2,15E+00 | 1,42E-01 | 4,77E-01 | Mir6363       | 1,30 | No  |
| ENSMUSG00000098483 | -5,50E-01 | -0,614048443 | 2,07E+00 | 1,50E-01 | 4,91E-01 | Mir7078       | 0,68 | No  |
| ENSMUSG00000098487 | -9,01E-01 | -1,152474602 | 3,09E+00 | 7,88E-02 | 3,59E-01 | Mir6899       | 0,54 | No  |
| ENSMUSG00000098488 | 4,96E-01  | 1,517280016  | 8,25E+00 | 4,07E-03 | 4,80E-02 | Pla2g4b       | 1,41 | Yes |
| ENSMUSG00000098489 | -7,36E-02 | -1,424828298 | 2,03E-02 | 8,87E-01 | 1,00E+00 | Mir7678       | 0,95 | No  |

|                    |           |              |           |          |          |           |      |     |
|--------------------|-----------|--------------|-----------|----------|----------|-----------|------|-----|
| ENSMUSG00000098490 | -6,94E-02 | -2,107607555 | 7,80E-03  | 9,30E-01 | 1,00E+00 | Mir7089   | 0,95 | No  |
| ENSMUSG00000098491 | -3,83E-02 | -3,107651936 | -7,91E-11 | 1,00E+00 | 1,00E+00 | Gm27688   | 0,97 | No  |
| ENSMUSG00000098492 | -2,48E+00 | -2,267969102 | 8,61E+00  | 3,33E-03 | 4,14E-02 | Gm19353   | 0,18 | Yes |
| ENSMUSG00000098497 | 7,29E-01  | -2,683144679 | 2,90E-01  | 5,90E-01 | 8,41E-01 | Mir6932   | 1,66 | No  |
| ENSMUSG00000098498 | 6,29E-03  | -0,863769564 | 2,46E-04  | 9,87E-01 | 1,00E+00 | Mir8099-1 | 1,00 | No  |
| ENSMUSG00000098499 | 2,60E-01  | 0,853910409  | 1,39E+00  | 2,39E-01 | 5,50E-01 | Mir6975   | 1,20 | No  |
| ENSMUSG00000098503 | 2,64E-01  | 1,320154889  | 2,05E+00  | 1,52E-01 | 4,94E-01 | Gm27937   | 1,20 | No  |
| ENSMUSG00000098504 | -1,89E+00 | -3,1076441   | 1,42E+00  | 2,33E-01 | 5,50E-01 | Mir6351   | 0,27 | No  |
| ENSMUSG00000098506 | -2,05E-01 | 3,059744359  | 3,45E+00  | 6,31E-02 | 3,13E-01 | Phf20-ps  | 0,87 | No  |
| ENSMUSG00000098510 | -2,34E+00 | -2,800975063 | 2,15E+00  | 1,43E-01 | 4,78E-01 | Mir6968   | 0,20 | No  |
| ENSMUSG00000098511 | -8,64E-02 | -2,600672928 | 6,80E-03  | 9,34E-01 | 1,00E+00 | Mir7072   | 0,94 | No  |
| ENSMUSG00000098513 | 1,86E+00  | -2,963235356 | 1,35E+00  | 2,46E-01 | 5,50E-01 | Mir6399   | 3,62 | No  |
| ENSMUSG00000098516 | -1,60E+00 | -1,863689726 | 5,84E+00  | 1,57E-02 | 1,30E-01 | Mir7651   | 0,33 | No  |
| ENSMUSG00000098525 | -1,89E+00 | -3,1076441   | 1,42E+00  | 2,33E-01 | 5,50E-01 | Gm27365   | 0,27 | No  |
| ENSMUSG00000098527 | -3,63E-01 | -1,042608757 | 6,84E-01  | 4,08E-01 | 7,05E-01 | Mir6961   | 0,78 | No  |
| ENSMUSG00000098528 | -1,94E+00 | -3,107619243 | 1,50E+00  | 2,21E-01 | 5,50E-01 | Zfp572    | 0,26 | No  |
| ENSMUSG00000098530 | 3,42E-02  | -0,005398843 | 1,26E-02  | 9,11E-01 | 1,00E+00 | Gm28051   | 1,02 | No  |
| ENSMUSG00000098531 | 1,21E+00  | -2,770637313 | 9,11E-01  | 3,40E-01 | 6,41E-01 | Mir7041   | 2,32 | No  |
| ENSMUSG00000098532 | 2,33E-01  | -1,311210683 | 2,45E-01  | 6,20E-01 | 8,57E-01 | Mir7065   | 1,17 | No  |
| ENSMUSG00000098534 | -5,41E-01 | -2,311072074 | 2,31E-01  | 6,31E-01 | 8,63E-01 | Gm27167   | 0,69 | No  |
| ENSMUSG00000098535 | -1,22E+00 | -3,146113954 | 6,96E-01  | 4,04E-01 | 7,01E-01 | Gm27869   | 0,43 | No  |
| ENSMUSG00000098536 | -5,58E-01 | -1,641557109 | 9,11E-01  | 3,40E-01 | 6,41E-01 | Gm27868   | 0,68 | No  |
| ENSMUSG00000098537 | -1,05E-02 | -1,185804213 | 4,85E-04  | 9,82E-01 | 1,00E+00 | Gm27867   | 0,99 | No  |
| ENSMUSG00000098539 | -2,72E+00 | -2,963211345 | 2,94E+00  | 8,63E-02 | 3,78E-01 | Mir133c   | 0,15 | No  |
| ENSMUSG00000098540 | 3,08E-01  | -0,503916763 | 7,16E-01  | 3,97E-01 | 6,98E-01 | Mir7059   | 1,24 | No  |
| ENSMUSG00000098543 | -3,03E-01 | 4,400884616  | 1,44E+01  | 1,48E-04 | 3,36E-03 | Gm27533   | 0,81 | Yes |
| ENSMUSG00000098544 | -3,94E-01 | -1,963261708 | 3,61E-01  | 5,48E-01 | 8,15E-01 | Mir7211   | 0,76 | No  |
| ENSMUSG00000098547 | 3,02E-01  | 0,24807316   | 1,14E+00  | 2,86E-01 | 5,82E-01 | Mir6921   | 1,23 | No  |
| ENSMUSG00000098548 | -4,14E-01 | -0,778142795 | 1,06E+00  | 3,04E-01 | 6,01E-01 | Mir6996   | 0,75 | No  |
| ENSMUSG00000098550 | 5,18E-01  | -1,333287889 | 9,53E-01  | 3,29E-01 | 6,30E-01 | Mir7079   | 1,43 | No  |
| ENSMUSG00000098553 | -7,38E-02 | -3,033659033 | 2,66E-03  | 9,59E-01 | 1,00E+00 | Mir3569   | 0,95 | No  |
| ENSMUSG00000098557 | 1,66E-01  | 8,81918395   | 8,45E+00  | 3,64E-03 | 4,42E-02 | Kctd12    | 1,12 | Yes |

|                    |           |              |          |          |          |            |      |    |
|--------------------|-----------|--------------|----------|----------|----------|------------|------|----|
| ENSMUSG00000098558 | 3,46E-01  | -1,863769036 | 3,04E-01 | 5,81E-01 | 8,37E-01 | Mir7049    | 1,27 | No |
| ENSMUSG00000098561 | -1,68E-01 | -1,195691448 | 1,47E-01 | 7,02E-01 | 9,05E-01 | Gtpbp4-ps5 | 0,89 | No |
| ENSMUSG00000098562 | 1,63E-01  | 1,731648786  | 9,87E-01 | 3,20E-01 | 6,21E-01 | Mir6910    | 1,12 | No |
| ENSMUSG00000098566 | 5,55E-02  | -0,904274139 | 1,67E-02 | 8,97E-01 | 1,00E+00 | Gm27761    | 1,04 | No |
| ENSMUSG00000098567 | -4,52E-01 | -1,561103857 | 7,61E-01 | 3,83E-01 | 6,85E-01 | Gm27762    | 0,73 | No |
| ENSMUSG00000098568 | -4,84E-02 | -2,246999522 | 3,51E-03 | 9,53E-01 | 1,00E+00 | Mir6987    | 0,97 | No |
| ENSMUSG00000098569 | -4,25E-01 | -2,730310103 | 1,36E-01 | 7,12E-01 | 9,11E-01 | Mir7020    | 0,74 | No |
| ENSMUSG00000098570 | -5,33E-01 | -2,070157834 | 4,55E-01 | 5,00E-01 | 7,85E-01 | Gm27444    | 0,69 | No |
| ENSMUSG00000098573 | 8,24E-02  | 3,382794646  | 6,45E-01 | 4,22E-01 | 7,18E-01 | Gm27232    | 1,06 | No |
| ENSMUSG00000098574 | 1,00E-02  | -1,322109892 | 4,47E-04 | 9,83E-01 | 1,00E+00 | Mir7037    | 1,01 | No |
| ENSMUSG00000098577 | 2,61E+00  | -3,033672762 | 2,63E+00 | 1,05E-01 | 3,97E-01 | Gm27445    | 6,10 | No |
| ENSMUSG00000098579 | 1,76E-01  | -0,190909991 | 3,33E-01 | 5,64E-01 | 8,26E-01 | Mir6937    | 1,13 | No |
| ENSMUSG00000098580 | 4,05E-01  | 0,669299186  | 3,07E+00 | 7,95E-02 | 3,61E-01 | Mir7023    | 1,32 | No |
| ENSMUSG00000098583 | -5,23E-02 | -2,497558176 | 2,82E-03 | 9,58E-01 | 1,00E+00 | Mir7044    | 0,96 | No |
| ENSMUSG00000098586 | 7,80E-01  | -1,711840224 | 1,87E+00 | 1,71E-01 | 5,28E-01 | Gm27775    | 1,72 | No |
| ENSMUSG00000098588 | -6,54E-02 | 1,698217732  | 1,47E-01 | 7,02E-01 | 9,05E-01 | Mir6340    | 0,96 | No |
| ENSMUSG00000098589 | -7,13E-01 | -2,600727421 | 5,67E-01 | 4,51E-01 | 7,41E-01 | Gm27353    | 0,61 | No |
| ENSMUSG00000098590 | 2,65E+00  | -2,963270355 | 2,72E+00 | 9,93E-02 | 3,92E-01 | Gm1113     | 6,29 | No |
| ENSMUSG00000098593 | 2,38E-01  | -1,785765164 | 1,31E-01 | 7,18E-01 | 9,14E-01 | Mir7064    | 1,18 | No |
| ENSMUSG00000098595 | -7,11E-02 | -2,86372263  | 2,84E-03 | 9,57E-01 | 1,00E+00 | Gm27957    | 0,95 | No |
| ENSMUSG00000098596 | 1,21E+00  | -3,107652142 | 6,74E-01 | 4,12E-01 | 7,07E-01 | Mir7226    | 2,31 | No |
| ENSMUSG00000098597 | 1,61E-02  | 2,644408042  | 1,60E-02 | 8,99E-01 | 1,00E+00 | Mir6418    | 1,01 | No |
| ENSMUSG00000098600 | 1,58E-01  | -2,058049149 | 4,05E-02 | 8,41E-01 | 9,84E-01 | Mir6929    | 1,12 | No |
| ENSMUSG00000098602 | -2,95E-01 | 0,474201469  | 1,42E+00 | 2,33E-01 | 5,50E-01 | Mir6946    | 0,81 | No |
| ENSMUSG00000098604 | 1,60E+00  | -2,548255954 | 2,79E+00 | 9,48E-02 | 3,85E-01 | Gm27295    | 3,03 | No |
| ENSMUSG00000098606 | 1,17E+00  | -3,14612376  | 6,40E-01 | 4,24E-01 | 7,18E-01 | Mir6903    | 2,26 | No |
| ENSMUSG00000098607 | 1,85E+00  | -3,107657832 | 1,35E+00 | 2,46E-01 | 5,50E-01 | Mir6360    | 3,61 | No |
| ENSMUSG00000098608 | -2,60E-01 | -2,600654849 | 7,34E-02 | 7,86E-01 | 9,52E-01 | Mir6981    | 0,84 | No |
| ENSMUSG00000098609 | -2,93E-02 | 1,255205291  | 2,39E-02 | 8,77E-01 | 1,00E+00 | Anxa11os   | 0,98 | No |
| ENSMUSG00000098613 | 1,01E-01  | -1,627651946 | 3,26E-02 | 8,57E-01 | 9,93E-01 | Mir6931    | 1,07 | No |
| ENSMUSG00000098614 | -3,61E-01 | -2,907336861 | 6,36E-02 | 8,01E-01 | 9,61E-01 | Gm27301    | 0,78 | No |
| ENSMUSG00000098618 | -1,94E+00 | -3,107619243 | 1,50E+00 | 2,21E-01 | 5,50E-01 | Gm27299    | 0,26 | No |

|                    |           |              |           |          |          |               |      |    |
|--------------------|-----------|--------------|-----------|----------|----------|---------------|------|----|
| ENSMUSG00000098620 | -8,25E-01 | -2,831935919 | 3,74E-01  | 5,41E-01 | 8,11E-01 | Gm27209       | 0,56 | No |
| ENSMUSG00000098621 | 2,91E-01  | -1,155969286 | 3,93E-01  | 5,31E-01 | 8,05E-01 | Gm27740       | 1,22 | No |
| ENSMUSG00000098623 | 1,64E-01  | 0,62149853   | 4,77E-01  | 4,90E-01 | 7,76E-01 | Mir8112       | 1,12 | No |
| ENSMUSG00000098624 | 1,60E-01  | 1,163843267  | 6,72E-01  | 4,12E-01 | 7,08E-01 | Mir7036       | 1,12 | No |
| ENSMUSG00000098625 | -2,01E-01 | -0,937687753 | 2,26E-01  | 6,34E-01 | 8,66E-01 | Mir6953       | 0,87 | No |
| ENSMUSG00000098626 | -5,50E-01 | -2,152748931 | 5,14E-01  | 4,73E-01 | 7,61E-01 | Gm27972       | 0,68 | No |
| ENSMUSG00000098627 | 1,79E+00  | -3,033666867 | 1,28E+00  | 2,58E-01 | 5,50E-01 | 4930524008Rik | 3,46 | No |
| ENSMUSG00000098631 | 4,13E-01  | -1,785717717 | 4,41E-01  | 5,07E-01 | 7,91E-01 | Mir6957       | 1,33 | No |
| ENSMUSG00000098632 | -3,78E-01 | -2,86371621  | 8,79E-02  | 7,67E-01 | 9,40E-01 | Mir7665       | 0,77 | No |
| ENSMUSG00000098634 | 2,57E+00  | -3,0336723   | 2,56E+00  | 1,10E-01 | 4,06E-01 | Mir8096       | 5,96 | No |
| ENSMUSG00000098641 | 8,28E-01  | -2,655151068 | 5,97E-01  | 4,40E-01 | 7,32E-01 | Rnu3b4        | 1,78 | No |
| ENSMUSG00000098642 | 7,71E-01  | -2,896111176 | 3,24E-01  | 5,69E-01 | 8,30E-01 | Gm27977       | 1,71 | No |
| ENSMUSG00000098645 | -6,77E-01 | -2,311191648 | 7,02E-01  | 4,02E-01 | 7,00E-01 | Gm27201       | 0,63 | No |
| ENSMUSG00000098646 | -1,18E-02 | -0,75563093  | 9,15E-04  | 9,76E-01 | 1,00E+00 | Mir7084       | 0,99 | No |
| ENSMUSG00000098650 | 1,63E-01  | 5,645832134  | 5,69E+00  | 1,70E-02 | 1,36E-01 | Gm28048       | 1,12 | No |
| ENSMUSG00000098651 | 6,08E-01  | -0,726130878 | 2,05E+00  | 1,52E-01 | 4,94E-01 | Mir6999       | 1,52 | No |
| ENSMUSG00000098652 | -2,50E-01 | -0,160825012 | 6,37E-01  | 4,25E-01 | 7,19E-01 | Gm27671       | 0,84 | No |
| ENSMUSG00000098654 | 4,09E-02  | -1,980601875 | 2,80E-03  | 9,58E-01 | 1,00E+00 | Gm27676       | 1,03 | No |
| ENSMUSG00000098655 | -2,99E-01 | -0,361240297 | 7,04E-01  | 4,01E-01 | 7,00E-01 | Mir7011       | 0,81 | No |
| ENSMUSG00000098656 | 2,86E-01  | -1,627680191 | 2,47E-01  | 6,19E-01 | 8,56E-01 | Mir7028       | 1,22 | No |
| ENSMUSG00000098661 | 1,99E-01  | -0,770747777 | 2,61E-01  | 6,09E-01 | 8,51E-01 | Mir7052       | 1,15 | No |
| ENSMUSG00000098663 | -1,40E-01 | -1,600689986 | 5,84E-02  | 8,09E-01 | 9,65E-01 | Mir6958       | 0,91 | No |
| ENSMUSG00000098670 | 3,17E+00  | -2,896124898 | 4,11E+00  | 4,25E-02 | 2,45E-01 | Gm27818       | 9,03 | No |
| ENSMUSG00000098671 | -2,45E-01 | -1,098071674 | 2,97E-01  | 5,86E-01 | 8,39E-01 | Mir7075       | 0,84 | No |
| ENSMUSG00000098672 | 1,33E-01  | -1,485240521 | 6,19E-02  | 8,04E-01 | 9,62E-01 | Mir6911       | 1,10 | No |
| ENSMUSG00000098674 | -1,94E+00 | -3,107619243 | 1,50E+00  | 2,21E-01 | 5,50E-01 | Gm27813       | 0,26 | No |
| ENSMUSG00000098675 | -1,29E+00 | -3,070165927 | 7,49E-01  | 3,87E-01 | 6,87E-01 | Mir6364       | 0,41 | No |
| ENSMUSG00000098676 | 4,85E-01  | -2,548252354 | 2,51E-01  | 6,16E-01 | 8,54E-01 | Mir6359       | 1,40 | No |
| ENSMUSG00000098678 | 4,61E-03  | -1,070111724 | 1,02E-04  | 9,92E-01 | 1,00E+00 | Mroh6         | 1,00 | No |
| ENSMUSG00000098679 | 3,14E-02  | -3,107617333 | -7,69E-10 | 1,00E+00 | 1,00E+00 | Mir7688       | 1,02 | No |
| ENSMUSG00000098680 | -1,82E-02 | -0,195785176 | 3,04E-03  | 9,56E-01 | 1,00E+00 | Mir6898       | 0,99 | No |
| ENSMUSG00000098686 | -6,89E-01 | -3,070170815 | 1,90E-01  | 6,63E-01 | 8,83E-01 | Mir6973b      | 0,62 | No |

|                    |           |              |           |          |          |               |      |    |
|--------------------|-----------|--------------|-----------|----------|----------|---------------|------|----|
| ENSMUSG00000098688 | -8,32E-01 | -2,929290669 | 3,79E-01  | 5,38E-01 | 8,09E-01 | Gm27820       | 0,56 | No |
| ENSMUSG00000098689 | -2,06E+00 | -2,655037213 | 3,22E+00  | 7,28E-02 | 3,42E-01 | Mir6345       | 0,24 | No |
| ENSMUSG00000098690 | 1,79E+00  | -3,033666867 | 1,28E+00  | 2,58E-01 | 5,50E-01 | Gm27316       | 3,46 | No |
| ENSMUSG00000098691 | -3,83E-02 | -3,107651936 | -7,91E-11 | 1,00E+00 | 1,00E+00 | Gm27317       | 0,97 | No |
| ENSMUSG00000098692 | 2,43E-01  | -1,184708615 | 2,68E-01  | 6,05E-01 | 8,49E-01 | Gm28041       | 1,18 | No |
| ENSMUSG00000098693 | -8,61E-01 | -2,896137113 | 4,07E-01  | 5,24E-01 | 8,01E-01 | Gm27619       | 0,55 | No |
| ENSMUSG00000098694 | -8,08E-03 | -3,070176788 | -1,34E-10 | 1,00E+00 | 1,00E+00 | Gm27506       | 0,99 | No |
| ENSMUSG00000098696 | 1,20E+00  | -3,146123991 | 6,74E-01  | 4,12E-01 | 7,07E-01 | Gm27617       | 2,30 | No |
| ENSMUSG00000098698 | -3,25E-01 | -2,548240594 | 8,93E-02  | 7,65E-01 | 9,40E-01 | Mir6960       | 0,80 | No |
| ENSMUSG00000098701 | 4,53E-01  | -0,322255262 | 1,71E+00  | 1,91E-01 | 5,50E-01 | Mir6914       | 1,37 | No |
| ENSMUSG00000098702 | 8,58E-02  | 0,338024556  | 9,85E-02  | 7,54E-01 | 9,33E-01 | 1500015A07Rik | 1,06 | No |
| ENSMUSG00000098703 | -1,87E+00 | -3,107637761 | 1,39E+00  | 2,38E-01 | 5,50E-01 | Gm27527       | 0,27 | No |
| ENSMUSG00000098704 | -6,75E-02 | -2,172816292 | 8,09E-03  | 9,28E-01 | 1,00E+00 | Mir6934       | 0,95 | No |
| ENSMUSG00000098706 | -2,96E-01 | 1,513739603  | 2,82E+00  | 9,33E-02 | 3,83E-01 | Mir6979       | 0,81 | No |
| ENSMUSG00000098708 | 9,57E-01  | -1,522797838 | 3,31E+00  | 6,89E-02 | 3,30E-01 | Gm27252       | 1,94 | No |
| ENSMUSG00000098710 | -1,27E-01 | 0,385859188  | 2,50E-01  | 6,17E-01 | 8,55E-01 | Mir7067       | 0,92 | No |
| ENSMUSG00000098711 | -9,04E-02 | -1,012862501 | 4,49E-02  | 8,32E-01 | 9,78E-01 | Gm28030       | 0,94 | No |
| ENSMUSG00000098713 | -3,73E-01 | 0,799591486  | 2,71E+00  | 9,98E-02 | 3,92E-01 | Rps2-ps5      | 0,77 | No |
| ENSMUSG00000098714 | -4,19E-01 | -1,627629726 | 3,65E-01  | 5,46E-01 | 8,14E-01 | Mir7663       | 0,75 | No |
| ENSMUSG00000098715 | -5,00E-01 | -0,208984671 | 2,53E+00  | 1,12E-01 | 4,11E-01 | Gm28053       | 0,71 | No |
| ENSMUSG00000098716 | 7,88E-02  | 2,469410916  | 3,64E-01  | 5,46E-01 | 8,14E-01 | Gm28033       | 1,06 | No |
| ENSMUSG00000098719 | -3,76E-02 | -2,83200621  | 9,23E-04  | 9,76E-01 | 1,00E+00 | Mir7212       | 0,97 | No |
| ENSMUSG00000098721 | -1,57E-01 | -1,006795816 | 1,45E-01  | 7,04E-01 | 9,06E-01 | Mir6357       | 0,90 | No |
| ENSMUSG00000098726 | -1,06E-01 | -3,033634182 | 5,86E-03  | 9,39E-01 | 1,00E+00 | Mir6417       | 0,93 | No |
| ENSMUSG00000098729 | -1,94E+00 | -3,107619243 | 1,50E+00  | 2,21E-01 | 5,50E-01 | Gm27200       | 0,26 | No |
| ENSMUSG00000098730 | 1,84E+00  | -2,896172987 | 1,33E+00  | 2,49E-01 | 5,50E-01 | Mir6407       | 3,58 | No |
| ENSMUSG00000098731 | 4,68E-02  | 0,148265488  | 3,05E-02  | 8,61E-01 | 9,96E-01 | Mir7027       | 1,03 | No |
| ENSMUSG00000098732 | 3,06E-01  | -3,010008506 | 3,22E-02  | 8,58E-01 | 9,94E-01 | Gm27834       | 1,24 | No |
| ENSMUSG00000098733 | -4,83E-02 | -2,711619335 | 1,60E-03  | 9,68E-01 | 1,00E+00 | Gm27833       | 0,97 | No |
| ENSMUSG00000098735 | -4,95E-01 | -2,929328122 | 1,23E-01  | 7,25E-01 | 9,18E-01 | Mir7005       | 0,71 | No |
| ENSMUSG00000098737 | -3,26E-01 | -1,800992603 | 2,96E-01  | 5,86E-01 | 8,39E-01 | Mir7014       | 0,80 | No |
| ENSMUSG00000098740 | -3,83E-02 | -3,107651936 | -7,91E-11 | 1,00E+00 | 1,00E+00 | Gm27475       | 0,97 | No |

|                    |           |              |           |          |          |         |      |    |
|--------------------|-----------|--------------|-----------|----------|----------|---------|------|----|
| ENSMUSG00000098749 | -6,03E-01 | -1,811428962 | 8,07E-01  | 3,69E-01 | 6,70E-01 | Gm27477 | 0,66 | No |
| ENSMUSG00000098751 | -1,75E-01 | 0,006554909  | 3,53E-01  | 5,52E-01 | 8,19E-01 | Mir7672 | 0,89 | No |
| ENSMUSG00000098752 | 1,42E-01  | 0,539171188  | 3,35E-01  | 5,63E-01 | 8,26E-01 | Mir6897 | 1,10 | No |
| ENSMUSG00000098754 | -3,52E-01 | -0,711758915 | 8,26E-01  | 3,63E-01 | 6,64E-01 | Prn     | 0,78 | No |
| ENSMUSG00000098755 | 1,07E-01  | -2,107753479 | 2,52E-02  | 8,74E-01 | 1,00E+00 | Gm27651 | 1,08 | No |
| ENSMUSG00000098759 | 3,61E-01  | 0,816602569  | 2,46E+00  | 1,17E-01 | 4,23E-01 | Mir7063 | 1,28 | No |
| ENSMUSG00000098761 | -8,59E-02 | 1,45499743   | 2,27E-01  | 6,34E-01 | 8,66E-01 | Gm18821 | 0,94 | No |
| ENSMUSG00000098762 | 4,85E-01  | 0,917968954  | 4,87E+00  | 2,73E-02 | 1,86E-01 | Mir7045 | 1,40 | No |
| ENSMUSG00000098766 | -1,62E-01 | -0,497564775 | 2,18E-01  | 6,40E-01 | 8,70E-01 | Mir6386 | 0,89 | No |
| ENSMUSG00000098767 | 3,67E-01  | -2,60070481  | 1,21E-01  | 7,28E-01 | 9,20E-01 | Gm27755 | 1,29 | No |
| ENSMUSG00000098769 | 2,18E-01  | -1,929291553 | 1,21E-01  | 7,27E-01 | 9,19E-01 | Mir8103 | 1,16 | No |
| ENSMUSG00000098770 | 3,14E-02  | -3,107617333 | -7,69E-10 | 1,00E+00 | 1,00E+00 | Gm27440 | 1,02 | No |
| ENSMUSG00000098774 | 5,84E-01  | -0,025025078 | 3,69E+00  | 5,47E-02 | 2,86E-01 | Mir6930 | 1,50 | No |
| ENSMUSG00000098778 | 2,65E-01  | -2,424826004 | 7,99E-02  | 7,77E-01 | 9,47E-01 | Gm27231 | 1,20 | No |
| ENSMUSG00000098779 | 1,76E-01  | 2,743291504  | 2,13E+00  | 1,44E-01 | 4,80E-01 | Gm8602  | 1,13 | No |
| ENSMUSG00000098781 | -1,05E-02 | -0,640667756 | 8,22E-04  | 9,77E-01 | 1,00E+00 | Gm28044 | 0,99 | No |
| ENSMUSG00000098783 | 2,04E-01  | -0,801029598 | 2,66E-01  | 6,06E-01 | 8,50E-01 | Mir7050 | 1,15 | No |
| ENSMUSG00000098785 | -6,37E-01 | -1,548204714 | 1,49E+00  | 2,22E-01 | 5,50E-01 | Mir6395 | 0,64 | No |
| ENSMUSG00000098786 | -1,12E+00 | -2,655131199 | 9,46E-01  | 3,31E-01 | 6,31E-01 | Mir6995 | 0,46 | No |
| ENSMUSG00000098787 | 6,35E-01  | -2,57426278  | 3,34E-01  | 5,63E-01 | 8,26E-01 | Mir7088 | 1,55 | No |
| ENSMUSG00000098789 | 5,77E-03  | 1,741032594  | 1,29E-03  | 9,71E-01 | 1,00E+00 | Jmjd7   | 1,00 | No |
| ENSMUSG00000098790 | 8,28E-02  | 0,624474326  | 1,30E-01  | 7,18E-01 | 9,15E-01 | Mir6942 | 1,06 | No |
| ENSMUSG00000098791 | 2,68E-01  | -1,497618086 | 2,25E-01  | 6,36E-01 | 8,67E-01 | Gm27402 | 1,20 | No |
| ENSMUSG00000098792 | 9,61E-02  | -1,175663734 | 4,69E-02  | 8,29E-01 | 9,76E-01 | Gm27401 | 1,07 | No |
| ENSMUSG00000098793 | 1,92E-01  | -1,452712618 | 1,25E-01  | 7,23E-01 | 9,17E-01 | Gm27286 | 1,14 | No |
| ENSMUSG00000098794 | 2,91E-01  | -1,821682356 | 1,99E-01  | 6,56E-01 | 8,80E-01 | Gm28038 | 1,22 | No |
| ENSMUSG00000098798 | -1,70E-01 | 7,038646102  | 7,89E+00  | 4,98E-03 | 5,58E-02 | Gm27288 | 0,89 | No |
| ENSMUSG00000098800 | -1,87E+00 | -3,107637761 | 1,39E+00  | 2,38E-01 | 5,50E-01 | Gm27244 | 0,27 | No |
| ENSMUSG00000098802 | 9,68E-02  | 1,901824136  | 3,90E-01  | 5,32E-01 | 8,06E-01 | Mir7046 | 1,07 | No |
| ENSMUSG00000098808 | -2,14E-01 | 1,273868478  | 1,33E+00  | 2,48E-01 | 5,50E-01 | Mir7009 | 0,86 | No |
| ENSMUSG00000098811 | 1,63E-01  | -2,219709631 | 4,66E-02  | 8,29E-01 | 9,76E-01 | Mir6913 | 1,12 | No |
| ENSMUSG00000098812 | 3,13E-01  | -1,30035459  | 3,92E-01  | 5,31E-01 | 8,05E-01 | Mir7578 | 1,24 | No |



|                    |           |              |           |          |          |          |      |     |
|--------------------|-----------|--------------|-----------|----------|----------|----------|------|-----|
| ENSMUSG00000098813 | 1,38E-01  | -0,165814927 | 1,86E-01  | 6,66E-01 | 8,86E-01 | Gm27326  | 1,10 | No  |
| ENSMUSG00000098817 | -5,69E-02 | -3,107638538 | 1,33E-03  | 9,71E-01 | 1,00E+00 | Mir6409  | 0,96 | No  |
| ENSMUSG00000098822 | -3,61E-01 | -0,289304779 | 1,25E+00  | 2,64E-01 | 5,59E-01 | Mir7039  | 0,78 | No  |
| ENSMUSG00000098824 | 2,14E-01  | -1,278830998 | 1,94E-01  | 6,59E-01 | 8,82E-01 | Mir7006  | 1,16 | No  |
| ENSMUSG00000098826 | -1,40E+00 | -2,289418929 | 3,07E+00  | 7,96E-02 | 3,61E-01 | Mir7677  | 0,38 | No  |
| ENSMUSG00000098830 | 5,56E-01  | -0,548558078 | 2,17E+00  | 1,40E-01 | 4,73E-01 | Mir7024  | 1,47 | No  |
| ENSMUSG00000098831 | 2,60E-01  | -1,448642489 | 2,19E-01  | 6,40E-01 | 8,70E-01 | Mir7119  | 1,20 | No  |
| ENSMUSG00000098836 | -1,89E+00 | -3,1076441   | 1,42E+00  | 2,33E-01 | 5,50E-01 | Gm27572  | 0,27 | No  |
| ENSMUSG00000098837 | -1,55E-02 | -2,997986308 | 1,49E-04  | 9,90E-01 | 1,00E+00 | Gm20111  | 0,99 | No  |
| ENSMUSG00000098839 | -5,59E-01 | -2,548193732 | 2,45E-01  | 6,21E-01 | 8,57E-01 | Mir7054  | 0,68 | No  |
| ENSMUSG00000098840 | 2,24E-01  | -2,401429835 | 6,31E-02  | 8,02E-01 | 9,61E-01 | Mir7679  | 1,17 | No  |
| ENSMUSG00000098842 | -1,41E-01 | 5,664016134  | 4,33E+00  | 3,75E-02 | 2,30E-01 | Gm27907  | 0,91 | No  |
| ENSMUSG00000098844 | 1,03E-01  | -2,015790324 | 2,21E-02  | 8,82E-01 | 1,00E+00 | Mir6992  | 1,07 | No  |
| ENSMUSG00000098850 | -4,86E-01 | 0,091691888  | 2,74E+00  | 9,79E-02 | 3,91E-01 | Gm27390  | 0,71 | No  |
| ENSMUSG00000098851 | 1,21E-02  | -3,033650469 | 7,34E-11  | 1,00E+00 | 1,00E+00 | Mir6353  | 1,01 | No  |
| ENSMUSG00000098856 | -5,76E-01 | -2,711716568 | 2,61E-01  | 6,10E-01 | 8,51E-01 | Mir8113  | 0,67 | No  |
| ENSMUSG00000098857 | 2,64E+00  | -2,929319603 | 2,70E+00  | 1,01E-01 | 3,92E-01 | Gm27395  | 6,24 | No  |
| ENSMUSG00000098859 | 4,06E-01  | -2,863707359 | 8,25E-02  | 7,74E-01 | 9,44E-01 | Gm27389  | 1,32 | No  |
| ENSMUSG00000098863 | -1,32E-01 | 0,074967564  | 2,11E-01  | 6,46E-01 | 8,74E-01 | Mir8101  | 0,91 | No  |
| ENSMUSG00000098865 | 2,27E+00  | -3,070181583 | 1,97E+00  | 1,60E-01 | 5,09E-01 | Gm27702  | 4,82 | No  |
| ENSMUSG00000098866 | 3,14E-02  | -3,107617333 | -7,69E-10 | 1,00E+00 | 1,00E+00 | Mir6539  | 1,02 | No  |
| ENSMUSG00000098871 | -4,55E-01 | 1,733041788  | 7,66E+00  | 5,66E-03 | 6,12E-02 | Mir6381  | 0,73 | No  |
| ENSMUSG00000098874 | -6,14E-02 | -2,268038193 | 5,21E-03  | 9,42E-01 | 1,00E+00 | Gm27960  | 0,96 | No  |
| ENSMUSG00000098875 | 3,14E-02  | -3,107617333 | -7,69E-10 | 1,00E+00 | 1,00E+00 | Gm27211  | 1,02 | No  |
| ENSMUSG00000098879 | -8,93E-02 | -2,96327978  | 3,63E-03  | 9,52E-01 | 1,00E+00 | Mir7675  | 0,94 | No  |
| ENSMUSG00000098881 | 1,31E-02  | -0,561130334 | 1,29E-03  | 9,71E-01 | 1,00E+00 | Mir6927  | 1,01 | No  |
| ENSMUSG00000098886 | 3,46E-01  | -2,311190887 | 1,71E-01  | 6,79E-01 | 8,93E-01 | Mir6385  | 1,27 | No  |
| ENSMUSG00000098889 | -1,16E-01 | -0,546020392 | 1,01E-01  | 7,51E-01 | 9,32E-01 | Gm27206  | 0,92 | No  |
| ENSMUSG00000098890 | 1,02E-01  | -2,01579811  | 2,30E-02  | 8,79E-01 | 1,00E+00 | Mir7008  | 1,07 | No  |
| ENSMUSG00000098893 | -2,62E-01 | 4,484462664  | 1,06E+01  | 1,15E-03 | 1,82E-02 | Gm17828  | 0,83 | Yes |
| ENSMUSG00000098896 | -2,99E-01 | -1,683110666 | 2,71E-01  | 6,03E-01 | 8,48E-01 | Mir3473g | 0,81 | No  |
| ENSMUSG00000098898 | -1,86E+00 | -3,033612668 | 1,39E+00  | 2,38E-01 | 5,50E-01 | Gm27754  | 0,28 | No  |

|                    |           |              |           |          |          |               |      |    |
|--------------------|-----------|--------------|-----------|----------|----------|---------------|------|----|
| ENSMUSG00000098900 | 3,30E-01  | -1,413056985 | 3,77E-01  | 5,39E-01 | 8,09E-01 | Gm18190       | 1,26 | No |
| ENSMUSG00000098904 | -2,24E-01 | -2,424840323 | 6,05E-02  | 8,06E-01 | 9,63E-01 | Mir6998       | 0,86 | No |
| ENSMUSG00000098905 | 2,79E-01  | 2,921117016  | 6,08E+00  | 1,36E-02 | 1,17E-01 | Zfp953        | 1,21 | No |
| ENSMUSG00000098906 | -4,97E-01 | -0,361271146 | 2,19E+00  | 1,39E-01 | 4,71E-01 | Mir7652       | 0,71 | No |
| ENSMUSG00000098907 | 1,96E-01  | 0,46656565   | 6,22E-01  | 4,30E-01 | 7,24E-01 | Mir7082       | 1,15 | No |
| ENSMUSG00000098912 | 1,45E-01  | 4,386068709  | 3,14E+00  | 7,65E-02 | 3,53E-01 | 1500004A13Rik | 1,11 | No |
| ENSMUSG00000098914 | 3,76E-01  | -1,570065715 | 4,52E-01  | 5,02E-01 | 7,87E-01 | Gm27747       | 1,30 | No |
| ENSMUSG00000098915 | -2,09E-01 | 4,685933986  | 7,22E+00  | 7,21E-03 | 7,35E-02 | Rpl15-ps2     | 0,87 | No |
| ENSMUSG00000098917 | -7,89E-02 | 1,390737043  | 1,84E-01  | 6,68E-01 | 8,86E-01 | Mir7654       | 0,95 | No |
| ENSMUSG00000098918 | 1,54E+00  | -2,146227273 | 3,56E+00  | 5,91E-02 | 3,01E-01 | Mir6481       | 2,91 | No |
| ENSMUSG00000098919 | -8,61E-01 | -2,711756161 | 4,05E-01  | 5,24E-01 | 8,01E-01 | Mir8102       | 0,55 | No |
| ENSMUSG00000098923 | 1,29E-01  | 5,312985811  | 3,29E+00  | 6,96E-02 | 3,32E-01 | Tmem185b      | 1,09 | No |
| ENSMUSG00000098925 | -1,71E+00 | -2,683116831 | 2,04E+00  | 1,54E-01 | 4,97E-01 | Rnu3b2        | 0,31 | No |
| ENSMUSG00000098926 | -1,01E-01 | 0,066528764  | 1,23E-01  | 7,26E-01 | 9,19E-01 | Mir6904       | 0,93 | No |
| ENSMUSG00000098928 | 1,25E-01  | 0,070777451  | 1,68E-01  | 6,82E-01 | 8,94E-01 | Mir6988       | 1,09 | No |
| ENSMUSG00000098929 | -9,08E-01 | -1,740717749 | 1,76E+00  | 1,85E-01 | 5,49E-01 | Mir6400       | 0,53 | No |
| ENSMUSG00000098931 | -2,38E-01 | -0,711665742 | 3,51E-01  | 5,54E-01 | 8,19E-01 | Mir8099-2     | 0,85 | No |
| ENSMUSG00000098934 | -5,97E-02 | 3,02500336   | 2,89E-01  | 5,91E-01 | 8,41E-01 | Gm18853       | 0,96 | No |
| ENSMUSG00000098942 | -1,92E+00 | -3,0336536   | 1,46E+00  | 2,27E-01 | 5,50E-01 | Mir8100       | 0,26 | No |
| ENSMUSG00000098943 | 1,09E-01  | -2,448667246 | 1,29E-02  | 9,09E-01 | 1,00E+00 | Rnu3b1        | 1,08 | No |
| ENSMUSG00000098944 | 2,74E-02  | -3,033621357 | 9,16E-12  | 1,00E+00 | 1,00E+00 | Mir8120       | 1,02 | No |
| ENSMUSG00000098945 | -2,71E+00 | -3,033620915 | 2,92E+00  | 8,75E-02 | 3,78E-01 | Gm27150       | 0,15 | No |
| ENSMUSG00000098948 | -1,03E-01 | 1,182502012  | 2,74E-01  | 6,00E-01 | 8,47E-01 | Gm27640       | 0,93 | No |
| ENSMUSG00000098950 | 6,65E-02  | 5,41809035   | 9,15E-01  | 3,39E-01 | 6,39E-01 | Gm28036       | 1,05 | No |
| ENSMUSG00000098951 | -4,13E-01 | -1,600640025 | 5,35E-01  | 4,65E-01 | 7,53E-01 | Mir7647       | 0,75 | No |
| ENSMUSG00000098954 | 3,02E-01  | 0,144091891  | 1,17E+00  | 2,79E-01 | 5,76E-01 | Mir7658       | 1,23 | No |
| ENSMUSG00000098955 | 1,47E-03  | 1,816798737  | 8,45E-05  | 9,93E-01 | 1,00E+00 | Mir6935       | 1,00 | No |
| ENSMUSG00000098956 | -1,60E-02 | -1,413057725 | 1,01E-03  | 9,75E-01 | 1,00E+00 | Gm27855       | 0,99 | No |
| ENSMUSG00000098957 | -1,86E+00 | -2,963205176 | 1,40E+00  | 2,36E-01 | 5,50E-01 | Mir8105       | 0,28 | No |
| ENSMUSG00000098958 | 2,77E-01  | -0,033695226 | 7,90E-01  | 3,74E-01 | 6,75E-01 | Mir6933       | 1,21 | No |
| ENSMUSG00000098961 | 5,97E-03  | -3,1461183   | -3,40E-10 | 1,00E+00 | 1,00E+00 | Mir6949       | 1,00 | No |
| ENSMUSG00000098967 | -4,60E-01 | -1,879805156 | 5,63E-01  | 4,53E-01 | 7,43E-01 | Gm27845       | 0,73 | No |

|                    |           |              |          |          |          |               |      |     |
|--------------------|-----------|--------------|----------|----------|----------|---------------|------|-----|
| ENSMUSG00000098972 | -5,27E-01 | -2,051809851 | 5,58E-01 | 4,55E-01 | 7,44E-01 | Mir8093       | 0,69 | No  |
| ENSMUSG00000098973 | -7,71E-01 | 5,161613115  | 1,09E+02 | 1,27E-25 | 4,66E-23 | Mir6236       | 0,59 | Yes |
| ENSMUSG00000098974 | -2,87E-01 | 4,354196857  | 1,26E+01 | 3,85E-04 | 7,41E-03 | Gm27505       | 0,82 | Yes |
| ENSMUSG00000098975 | 1,46E-01  | 2,278580024  | 1,12E+00 | 2,90E-01 | 5,86E-01 | Gm27177       | 1,11 | No  |
| ENSMUSG00000098976 | 1,18E+00  | -3,033658668 | 6,58E-01 | 4,17E-01 | 7,12E-01 | Mir6769b      | 2,26 | No  |
| ENSMUSG00000098977 | 6,47E-01  | -2,268064954 | 5,38E-01 | 4,63E-01 | 7,52E-01 | Gm27196       | 1,57 | No  |
| ENSMUSG00000098980 | 2,65E+00  | -3,033655087 | 2,73E+00 | 9,86E-02 | 3,91E-01 | Mir6397       | 6,30 | No  |
| ENSMUSG00000098983 | -5,88E-02 | -3,033616507 | 1,62E-03 | 9,68E-01 | 1,00E+00 | Gm28003       | 0,96 | No  |
| ENSMUSG00000098985 | 1,15E-02  | 2,935424     | 9,91E-03 | 9,21E-01 | 1,00E+00 | Gm27219       | 1,01 | No  |
| ENSMUSG00000098986 | -2,97E-01 | 4,39166056   | 1,37E+01 | 2,10E-04 | 4,52E-03 | Gm28006       | 0,81 | Yes |
| ENSMUSG00000098987 | 8,74E-02  | -2,051697321 | 1,00E-02 | 9,20E-01 | 1,00E+00 | Gm8982        | 1,06 | No  |
| ENSMUSG00000098988 | -5,24E-02 | -2,963220811 | 1,25E-03 | 9,72E-01 | 1,00E+00 | Gm28008       | 0,96 | No  |
| ENSMUSG00000098992 | -2,91E-01 | 0,726890891  | 1,62E+00 | 2,03E-01 | 5,50E-01 | Gm27597       | 0,82 | No  |
| ENSMUSG00000098994 | 1,77E-01  | -2,01573044  | 7,06E-02 | 7,90E-01 | 9,55E-01 | Gm27599       | 1,13 | No  |
| ENSMUSG00000098995 | 1,06E+00  | -2,18557363  | 1,82E+00 | 1,78E-01 | 5,38E-01 | Gm27598       | 2,08 | No  |
| ENSMUSG00000098996 | -1,91E-01 | 5,812139129  | 8,21E+00 | 4,17E-03 | 4,88E-02 | Mir7676-1     | 0,88 | Yes |
| ENSMUSG00000098997 | -1,12E+00 | -2,770593704 | 9,38E-01 | 3,33E-01 | 6,33E-01 | Mir6901       | 0,46 | No  |
| ENSMUSG00000098998 | -3,79E-01 | -1,63247031  | 4,03E-01 | 5,26E-01 | 8,03E-01 | Gm27913       | 0,77 | No  |
| ENSMUSG00000099002 | -3,46E-01 | -2,7408599   | 8,76E-02 | 7,67E-01 | 9,40E-01 | Gm25053       | 0,79 | No  |
| ENSMUSG00000099003 | -1,79E-01 | -0,778196411 | 2,14E-01 | 6,44E-01 | 8,72E-01 | Mir7035       | 0,88 | No  |
| ENSMUSG00000099005 | 1,87E+00  | -3,107639691 | 1,38E+00 | 2,40E-01 | 5,50E-01 | Mir6398       | 3,67 | No  |
| ENSMUSG00000099006 | -1,80E-01 | 0,45852983   | 4,74E-01 | 4,91E-01 | 7,77E-01 | Mir6974       | 0,88 | No  |
| ENSMUSG00000099008 | -8,12E-01 | -2,896127374 | 3,61E-01 | 5,48E-01 | 8,15E-01 | Gm17976       | 0,57 | No  |
| ENSMUSG00000099009 | 1,23E-01  | -2,62763472  | 1,47E-02 | 9,04E-01 | 1,00E+00 | Rdh16f1       | 1,09 | No  |
| ENSMUSG00000099017 | -1,29E+00 | -2,68312384  | 1,32E+00 | 2,51E-01 | 5,50E-01 | Mir7058       | 0,41 | No  |
| ENSMUSG00000099021 | -1,07E+00 | 0,157753879  | 1,27E+01 | 3,69E-04 | 7,15E-03 | Rn7s1         | 0,48 | Yes |
| ENSMUSG00000099024 | 6,44E-01  | -2,711701008 | 3,43E-01 | 5,58E-01 | 8,22E-01 | Gm27457       | 1,56 | No  |
| ENSMUSG00000099027 | -1,16E-01 | -0,112346469 | 1,27E-01 | 7,22E-01 | 9,16E-01 | Gm27176       | 0,92 | No  |
| ENSMUSG00000099031 | -1,36E+00 | -2,600707317 | 1,16E+00 | 2,81E-01 | 5,77E-01 | Mir7240       | 0,39 | No  |
| ENSMUSG00000099032 | -3,46E-01 | 1,668728956  | 4,27E+00 | 3,88E-02 | 2,33E-01 | Tcf24         | 0,79 | No  |
| ENSMUSG00000099033 | 1,03E-01  | -0,768063066 | 6,55E-02 | 7,98E-01 | 9,59E-01 | Mir7013       | 1,07 | No  |
| ENSMUSG00000099034 | 1,33E-01  | 0,09557014   | 2,10E-01 | 6,47E-01 | 8,74E-01 | 2810039B14Rik | 1,10 | No  |

|                    |           |              |          |          |          |            |      |    |
|--------------------|-----------|--------------|----------|----------|----------|------------|------|----|
| ENSMUSG00000099035 | -7,33E-02 | -2,7117358   | 4,27E-03 | 9,48E-01 | 1,00E+00 | Mir7040    | 0,95 | No |
| ENSMUSG00000099039 | -1,08E+00 | -2,627641137 | 1,07E+00 | 3,01E-01 | 5,97E-01 | Gm27928    | 0,47 | No |
| ENSMUSG00000099041 | 1,10E-01  | 2,931944758  | 9,17E-01 | 3,38E-01 | 6,39E-01 | Gm28035    | 1,08 | No |
| ENSMUSG00000099043 | 2,27E-01  | -1,655189393 | 1,25E-01 | 7,24E-01 | 9,17E-01 | Mir7022    | 1,17 | No |
| ENSMUSG00000099045 | -1,94E+00 | -3,107619243 | 1,50E+00 | 2,21E-01 | 5,50E-01 | Mir6374    | 0,26 | No |
| ENSMUSG00000099047 | -4,93E-01 | -1,510096548 | 8,15E-01 | 3,67E-01 | 6,68E-01 | Mir7029    | 0,71 | No |
| ENSMUSG00000099050 | 2,60E+00  | -2,963275374 | 2,63E+00 | 1,05E-01 | 3,97E-01 | Mir7655    | 6,08 | No |
| ENSMUSG00000099051 | 1,17E-01  | 2,561797966  | 8,26E-01 | 3,63E-01 | 6,65E-01 | Gm27241    | 1,08 | No |
| ENSMUSG00000099056 | -1,16E+00 | -2,268020371 | 2,19E+00 | 1,39E-01 | 4,71E-01 | Gtpbp4-ps3 | 0,45 | No |
| ENSMUSG00000099057 | -3,32E-01 | -0,175666563 | 1,10E+00 | 2,94E-01 | 5,89E-01 | Gm27185    | 0,79 | No |
| ENSMUSG00000099058 | 4,42E-01  | -2,033651554 | 3,46E-01 | 5,57E-01 | 8,21E-01 | Mir6943    | 1,36 | No |
| ENSMUSG00000099059 | -1,26E-01 | 6,65555177   | 4,10E+00 | 4,29E-02 | 2,46E-01 | Mir7676-2  | 0,92 | No |
| ENSMUSG00000099060 | -1,23E+00 | -3,146117124 | 7,12E-01 | 3,99E-01 | 6,98E-01 | Mir7025    | 0,42 | No |
| ENSMUSG00000099061 | 2,43E-01  | -2,683138759 | 4,30E-02 | 8,36E-01 | 9,80E-01 | Gm28050    | 1,18 | No |
| ENSMUSG00000099062 | -4,46E-01 | 0,734686678  | 3,85E+00 | 4,97E-02 | 2,69E-01 | Mir7077    | 0,73 | No |
| ENSMUSG00000099063 | 3,45E-01  | -0,937759398 | 5,42E-01 | 4,62E-01 | 7,50E-01 | Mir7031    | 1,27 | No |
| ENSMUSG00000099066 | 1,82E-01  | -1,236637228 | 1,35E-01 | 7,14E-01 | 9,12E-01 | Mir6978    | 1,13 | No |
| ENSMUSG00000099068 | -1,52E+00 | -1,770457323 | 5,12E+00 | 2,36E-02 | 1,69E-01 | Gm27861    | 0,35 | No |
| ENSMUSG00000099069 | -1,87E+00 | -3,107637761 | 1,39E+00 | 2,38E-01 | 5,50E-01 | Mir8090    | 0,27 | No |
| ENSMUSG00000099074 | 1,62E+00  | -2,77062188  | 1,81E+00 | 1,79E-01 | 5,40E-01 | Gm27564    | 3,08 | No |
| ENSMUSG00000099075 | 6,94E-01  | -1,440974463 | 1,69E+00 | 1,94E-01 | 5,50E-01 | Mir7674    | 1,62 | No |
| ENSMUSG00000099076 | -2,96E-01 | -1,06096281  | 4,77E-01 | 4,90E-01 | 7,76E-01 | Mir7070    | 0,81 | No |
| ENSMUSG00000099079 | 1,31E-01  | 0,776244703  | 3,44E-01 | 5,57E-01 | 8,21E-01 | Mir7068    | 1,09 | No |
| ENSMUSG00000099080 | 2,79E-03  | -1,837300628 | 1,84E-05 | 9,97E-01 | 1,00E+00 | Mir7071    | 1,00 | No |
| ENSMUSG00000099081 | -1,06E-04 | 1,76151111   | 4,21E-07 | 9,99E-01 | 1,00E+00 | Gm27624    | 1,00 | No |
| ENSMUSG00000099082 | -2,05E+00 | -2,289386006 | 5,18E+00 | 2,29E-02 | 1,65E-01 | Mir7036b   | 0,24 | No |
| ENSMUSG00000099083 | 1,84E-01  | 5,963241098  | 7,89E+00 | 4,97E-03 | 5,57E-02 | Atf7       | 1,14 | No |
| ENSMUSG00000099088 | -5,43E-01 | -0,650311297 | 1,80E+00 | 1,79E-01 | 5,40E-01 | Gm27920    | 0,69 | No |
| ENSMUSG00000099091 | -3,54E-01 | -1,355494247 | 4,66E-01 | 4,95E-01 | 7,80E-01 | Mir7003    | 0,78 | No |
| ENSMUSG00000099092 | -1,13E-01 | 2,807604007  | 9,18E-01 | 3,38E-01 | 6,38E-01 | Mir7062    | 0,92 | No |
| ENSMUSG00000099093 | 5,75E-01  | -3,070183787 | 1,30E-01 | 7,19E-01 | 9,15E-01 | Mir7000    | 1,49 | No |
| ENSMUSG00000099094 | -7,58E-01 | -1,600672027 | 1,50E+00 | 2,20E-01 | 5,50E-01 | Gm19569    | 0,59 | No |

|                    |           |              |           |          |          |               |      |    |
|--------------------|-----------|--------------|-----------|----------|----------|---------------|------|----|
| ENSMUSG00000099095 | -6,82E-02 | -2,89614027  | 2,05E-03  | 9,64E-01 | 1,00E+00 | Mir6376       | 0,95 | No |
| ENSMUSG00000099096 | -1,29E-01 | -1,522574209 | 5,12E-02  | 8,21E-01 | 9,72E-01 | Mir6945       | 0,91 | No |
| ENSMUSG00000099098 | -1,00E-01 | 2,039831852  | 4,61E-01  | 4,97E-01 | 7,82E-01 | 1110035H17Rik | 0,93 | No |
| ENSMUSG00000099101 | -7,50E-02 | -1,963274717 | 1,31E-02  | 9,09E-01 | 1,00E+00 | Mir7653       | 0,95 | No |
| ENSMUSG00000099102 | 2,14E+00  | -2,355631036 | 3,67E+00  | 5,54E-02 | 2,88E-01 | Gm11983       | 4,41 | No |
| ENSMUSG00000099104 | -4,15E-01 | -2,600681748 | 1,75E-01  | 6,75E-01 | 8,91E-01 | Gm17087       | 0,75 | No |
| ENSMUSG00000099105 | -1,87E+00 | -3,03364178  | 1,41E+00  | 2,36E-01 | 5,50E-01 | Mir7007       | 0,27 | No |
| ENSMUSG00000099109 | -3,56E-02 | 1,116233652  | 3,25E-02  | 8,57E-01 | 9,94E-01 | Mir7115       | 0,98 | No |
| ENSMUSG00000099110 | -1,17E-01 | 0,655722706  | 2,47E-01  | 6,19E-01 | 8,56E-01 | Mir6951       | 0,92 | No |
| ENSMUSG00000099112 | -7,24E-02 | 1,485839653  | 1,70E-01  | 6,81E-01 | 8,93E-01 | Gm27406       | 0,95 | No |
| ENSMUSG00000099115 | -1,90E+00 | -2,963262532 | 1,44E+00  | 2,31E-01 | 5,50E-01 | Gm17190       | 0,27 | No |
| ENSMUSG00000099117 | 7,50E-01  | -0,53961598  | 4,08E+00  | 4,33E-02 | 2,48E-01 | Gm27404       | 1,68 | No |
| ENSMUSG00000099118 | 3,92E-01  | -2,424782224 | 1,83E-01  | 6,69E-01 | 8,87E-01 | Mir8092       | 1,31 | No |
| ENSMUSG00000099119 | 3,56E-01  | -2,896118953 | 6,38E-02  | 8,01E-01 | 9,61E-01 | Mir6546       | 1,28 | No |
| ENSMUSG00000099123 | 2,26E+00  | -2,448738017 | 4,21E+00  | 4,01E-02 | 2,38E-01 | Mir6965       | 4,78 | No |
| ENSMUSG00000099125 | -2,68E-01 | -0,847677234 | 3,84E-01  | 5,35E-01 | 8,08E-01 | Gm27322       | 0,83 | No |
| ENSMUSG00000099127 | -6,45E-02 | -2,070155326 | 8,22E-03  | 9,28E-01 | 1,00E+00 | Gm27320       | 0,96 | No |
| ENSMUSG00000099131 | -7,67E-02 | -1,831893649 | 1,44E-02  | 9,05E-01 | 1,00E+00 | Mir7074       | 0,95 | No |
| ENSMUSG00000099137 | 1,98E-02  | 1,191360771  | 1,04E-02  | 9,19E-01 | 1,00E+00 | Gm10603       | 1,01 | No |
| ENSMUSG00000099139 | -2,63E-02 | -3,033641358 | 2,33E-04  | 9,88E-01 | 1,00E+00 | 1110028F18Rik | 0,98 | No |
| ENSMUSG00000099140 | -1,18E+00 | -2,267988184 | 1,82E+00  | 1,78E-01 | 5,38E-01 | Mir7237       | 0,44 | No |
| ENSMUSG00000099142 | 1,52E-01  | 2,106299045  | 1,11E+00  | 2,92E-01 | 5,88E-01 | Mir8108       | 1,11 | No |
| ENSMUSG00000099144 | 1,21E-01  | -0,464683142 | 1,23E-01  | 7,26E-01 | 9,19E-01 | Gm27486       | 1,09 | No |
| ENSMUSG00000099145 | -1,89E+00 | -3,1076441   | 1,42E+00  | 2,33E-01 | 5,50E-01 | Mir8116       | 0,27 | No |
| ENSMUSG00000099147 | 3,65E-01  | 0,492939594  | 2,25E+00  | 1,34E-01 | 4,60E-01 | Mir7081       | 1,29 | No |
| ENSMUSG00000099151 | -1,21E+00 | -3,107627547 | 6,96E-01  | 4,04E-01 | 7,01E-01 | Gm27803       | 0,43 | No |
| ENSMUSG00000099155 | -1,90E+00 | -3,033647263 | 1,44E+00  | 2,30E-01 | 5,50E-01 | Gm27805       | 0,27 | No |
| ENSMUSG00000099160 | -8,03E-01 | -2,896132011 | 3,52E-01  | 5,53E-01 | 8,19E-01 | Mir6415       | 0,57 | No |
| ENSMUSG00000099162 | -6,85E-02 | -2,896160586 | 3,23E-03  | 9,55E-01 | 1,00E+00 | Gm27168       | 0,95 | No |
| ENSMUSG00000099165 | -2,13E-01 | -2,247052521 | 6,55E-02  | 7,98E-01 | 9,59E-01 | Mir6940       | 0,86 | No |
| ENSMUSG00000099170 | 9,01E-03  | -3,107646452 | -5,16E-10 | 1,00E+00 | 1,00E+00 | 5730403I07Rik | 1,01 | No |
| ENSMUSG00000099178 | 6,28E-01  | 0,683218607  | 7,12E+00  | 7,62E-03 | 7,64E-02 | Gm8669        | 1,55 | No |

|                    |           |              |          |          |          |         |  |      |     |
|--------------------|-----------|--------------|----------|----------|----------|---------|--|------|-----|
| ENSMUSG00000099180 | 1,48E-02  | -0,006904313 | 2,56E-03 | 9,60E-01 | 1,00E+00 | Mir6956 |  | 1,01 | No  |
| ENSMUSG00000099181 | -3,74E-01 | -1,726164298 | 3,99E-01 | 5,28E-01 | 8,04E-01 | Mir6905 |  | 0,77 | No  |
| ENSMUSG00000099183 | -1,87E+00 | -3,03364178  | 1,41E+00 | 2,36E-01 | 5,50E-01 | Gm27881 |  | 0,27 | No  |
| ENSMUSG00000099191 | -1,89E+00 | -3,1076441   | 1,42E+00 | 2,33E-01 | 5,50E-01 | Gm27375 |  | 0,27 | No  |
| ENSMUSG00000099192 | 1,40E+00  | -2,863710411 | 9,01E-01 | 3,43E-01 | 6,43E-01 | Gm27373 |  | 2,63 | No  |
| ENSMUSG00000099196 | 2,63E+00  | -2,963275836 | 2,67E+00 | 1,02E-01 | 3,94E-01 | Mir1258 |  | 6,19 | No  |
| ENSMUSG00000099197 | -2,69E-01 | -0,747942525 | 4,43E-01 | 5,06E-01 | 7,90E-01 | Mir7034 |  | 0,83 | No  |
| ENSMUSG00000099199 | -4,52E-01 | -2,165739542 | 3,17E-01 | 5,74E-01 | 8,33E-01 | Mir7012 |  | 0,73 | No  |
| ENSMUSG00000099200 | -1,17E-01 | -1,413076077 | 5,03E-02 | 8,23E-01 | 9,73E-01 | Mir7019 |  | 0,92 | No  |
| ENSMUSG00000099202 | 2,09E-01  | 0,330803648  | 6,12E-01 | 4,34E-01 | 7,27E-01 | Mir7017 |  | 1,16 | No  |
| ENSMUSG00000099204 | 6,87E-01  | -1,80096482  | 1,12E+00 | 2,91E-01 | 5,86E-01 | Gm27943 |  | 1,61 | No  |
| ENSMUSG00000099206 | -6,89E-01 | -1,65504431  | 1,08E+00 | 2,98E-01 | 5,94E-01 | Gm27942 |  | 0,62 | No  |
| ENSMUSG00000099209 | -1,92E+00 | -3,107627446 | 1,47E+00 | 2,25E-01 | 5,50E-01 | Gm27941 |  | 0,26 | No  |
| ENSMUSG00000099210 | 1,60E-01  | 1,794945538  | 1,00E+00 | 3,17E-01 | 6,17E-01 | Mir7051 |  | 1,12 | No  |
| ENSMUSG00000099211 | -1,22E+00 | -3,146113954 | 6,96E-01 | 4,04E-01 | 7,01E-01 | Gm27684 |  | 0,43 | No  |
| ENSMUSG00000099212 | 3,74E-01  | -1,060979388 | 7,04E-01 | 4,02E-01 | 7,00E-01 | Mir7033 |  | 1,30 | No  |
| ENSMUSG00000099213 | 2,67E+00  | -2,963223118 | 2,76E+00 | 9,68E-02 | 3,88E-01 | Gm27686 |  | 6,39 | No  |
| ENSMUSG00000099214 | 1,87E+00  | -3,107639691 | 1,38E+00 | 2,40E-01 | 5,50E-01 | Mir6365 |  | 3,67 | No  |
| ENSMUSG00000099219 | -1,22E+00 | -3,146113954 | 6,96E-01 | 4,04E-01 | 7,01E-01 | Gm27680 |  | 0,43 | No  |
| ENSMUSG00000099222 | -1,85E+00 | -2,448682586 | 4,00E+00 | 4,55E-02 | 2,54E-01 | Mir7213 |  | 0,28 | No  |
| ENSMUSG00000099225 | -2,66E-01 | 0,18762454   | 9,22E-01 | 3,37E-01 | 6,38E-01 | Mir8104 |  | 0,83 | No  |
| ENSMUSG00000099227 | -1,84E-01 | 0,591902193  | 5,95E-01 | 4,40E-01 | 7,32E-01 | Mir8114 |  | 0,88 | No  |
| ENSMUSG00000099230 | 1,53E-01  | -0,131680161 | 2,40E-01 | 6,24E-01 | 8,59E-01 | Mir6989 |  | 1,11 | No  |
| ENSMUSG00000099232 | -1,22E+00 | -3,146113954 | 6,96E-01 | 4,04E-01 | 7,01E-01 | Gm27884 |  | 0,43 | No  |
| ENSMUSG00000099238 | -1,40E-01 | -1,117147728 | 1,06E-01 | 7,45E-01 | 9,29E-01 | Mir7001 |  | 0,91 | No  |
| ENSMUSG00000099240 | -4,14E-01 | -2,770606711 | 1,06E-01 | 7,45E-01 | 9,29E-01 | Gm27539 |  | 0,75 | No  |
| ENSMUSG00000099241 | -3,89E-01 | 2,834736844  | 1,09E+01 | 9,76E-04 | 1,59E-02 | Gm18852 |  | 0,76 | Yes |
| ENSMUSG00000099244 | -1,92E+00 | -3,0336536   | 1,46E+00 | 2,27E-01 | 5,50E-01 | Gm27542 |  | 0,26 | No  |
| ENSMUSG00000099245 | -5,67E-02 | 1,21086651   | 8,13E-02 | 7,76E-01 | 9,45E-01 | Mir8098 |  | 0,96 | No  |
| ENSMUSG00000099246 | -8,45E-01 | -2,963241229 | 3,92E-01 | 5,31E-01 | 8,05E-01 | Gm27540 |  | 0,56 | No  |
| ENSMUSG00000099250 | -8,29E-01 | 0,206942057  | 8,39E+00 | 3,78E-03 | 4,53E-02 | Rn7s2   |  | 0,56 | Yes |
| ENSMUSG00000099254 | 6,26E-02  | 1,322193533  | 1,12E-01 | 7,38E-01 | 9,25E-01 | Mir7030 |  | 1,04 | No  |

|                    |           |              |          |          |          |            |      |    |
|--------------------|-----------|--------------|----------|----------|----------|------------|------|----|
| ENSMUSG00000099258 | 1,74E-01  | 1,07045385   | 7,24E-01 | 3,95E-01 | 6,95E-01 | Mir7047    | 1,13 | No |
| ENSMUSG00000099259 | -5,42E-01 | -1,079307645 | 1,29E+00 | 2,56E-01 | 5,50E-01 | Mir6922    | 0,69 | No |
| ENSMUSG00000099260 | 2,38E-01  | -0,627725251 | 4,17E-01 | 5,18E-01 | 7,98E-01 | Mir6954    | 1,18 | No |
| ENSMUSG00000099261 | -2,69E-01 | -2,548229386 | 7,01E-02 | 7,91E-01 | 9,55E-01 | Mir6984    | 0,83 | No |
| ENSMUSG00000099267 | 4,52E-01  | 0,632858032  | 3,67E+00 | 5,54E-02 | 2,88E-01 | Mir6955    | 1,37 | No |
| ENSMUSG00000099269 | 4,28E-01  | -2,033572688 | 3,99E-01 | 5,28E-01 | 8,04E-01 | Caln5      | 1,35 | No |
| ENSMUSG00000099275 | 1,42E-01  | -0,460711606 | 1,62E-01 | 6,87E-01 | 8,98E-01 | Mir8107    | 1,10 | No |
| ENSMUSG00000099276 | -8,09E-02 | -2,831987248 | 4,50E-03 | 9,47E-01 | 1,00E+00 | Gm27228    | 0,95 | No |
| ENSMUSG00000099280 | -1,23E+00 | -2,424733584 | 1,70E+00 | 1,93E-01 | 5,50E-01 | Gm27991    | 0,43 | No |
| ENSMUSG00000099283 | -1,70E-01 | -0,431503559 | 2,26E-01 | 6,35E-01 | 8,66E-01 | Mir6912    | 0,89 | No |
| ENSMUSG00000099284 | 6,89E-02  | -0,070306099 | 5,17E-02 | 8,20E-01 | 9,71E-01 | Mir7026    | 1,05 | No |
| ENSMUSG00000099286 | -1,93E-01 | -0,278846815 | 3,33E-01 | 5,64E-01 | 8,27E-01 | Mir7235    | 0,87 | No |
| ENSMUSG00000099289 | -1,65E-01 | -0,971875952 | 1,48E-01 | 7,00E-01 | 9,04E-01 | Mir6403    | 0,89 | No |
| ENSMUSG00000099290 | 4,01E-01  | 0,467589542  | 2,43E+00 | 1,19E-01 | 4,29E-01 | Mir6985    | 1,32 | No |
| ENSMUSG00000099291 | -9,21E-01 | -2,574230447 | 6,02E-01 | 4,38E-01 | 7,30E-01 | Rnu3b3     | 0,53 | No |
| ENSMUSG00000099292 | 2,62E-01  | 2,960758076  | 5,07E+00 | 2,43E-02 | 1,71E-01 | Mir6916    | 1,20 | No |
| ENSMUSG00000099295 | 2,88E-01  | -0,583106755 | 5,55E-01 | 4,56E-01 | 7,46E-01 | Gm27718    | 1,22 | No |
| ENSMUSG00000099298 | 2,64E+00  | -3,033673223 | 2,69E+00 | 1,01E-01 | 3,92E-01 | Ranbp2-ps6 | 6,23 | No |
| ENSMUSG00000099301 | -4,87E-02 | -2,896124877 | 1,54E-03 | 9,69E-01 | 1,00E+00 | Mir3473e   | 0,97 | No |
| ENSMUSG00000099302 | -6,16E-01 | -1,07011393  | 1,81E+00 | 1,78E-01 | 5,39E-01 | Gm27421    | 0,65 | No |
| ENSMUSG00000099309 | -3,13E-01 | -1,088720336 | 4,75E-01 | 4,91E-01 | 7,77E-01 | Mir7085    | 0,80 | No |
| ENSMUSG00000099310 | -1,35E+00 | -2,89615366  | 1,14E+00 | 2,85E-01 | 5,82E-01 | Gm19427    | 0,39 | No |
| ENSMUSG00000099311 | -2,48E-01 | 1,739791155  | 2,20E+00 | 1,38E-01 | 4,69E-01 | Mir6244    | 0,84 | No |
| ENSMUSG00000099313 | -5,31E-02 | -2,770618626 | 1,28E-03 | 9,71E-01 | 1,00E+00 | Gm27152    | 0,96 | No |
| ENSMUSG00000099314 | -8,41E-01 | -2,08872525  | 1,47E+00 | 2,25E-01 | 5,50E-01 | Gm27734    | 0,56 | No |
| ENSMUSG00000099315 | 5,69E-01  | -1,309206453 | 1,22E+00 | 2,70E-01 | 5,67E-01 | Gm27175    | 1,48 | No |
| ENSMUSG00000099319 | 9,62E-01  | -2,473022844 | 1,15E+00 | 2,83E-01 | 5,80E-01 | Mir7648    | 1,95 | No |
| ENSMUSG00000099320 | -8,47E-01 | -2,03359322  | 1,38E+00 | 2,41E-01 | 5,50E-01 | Mir7664    | 0,56 | No |
| ENSMUSG00000099324 | -3,79E-02 | 0,666848073  | 2,68E-02 | 8,70E-01 | 1,00E+00 | Mir8115    | 0,97 | No |
| ENSMUSG00000099329 | -1,47E-02 | 1,887689853  | 8,73E-03 | 9,26E-01 | 1,00E+00 | Gm28052    | 0,99 | No |
| ENSMUSG00000099330 | -1,31E-01 | -1,548159111 | 4,68E-02 | 8,29E-01 | 9,76E-01 | Mir7053    | 0,91 | No |
| ENSMUSG00000099337 | -1,92E+00 | -3,033623267 | 1,46E+00 | 2,27E-01 | 5,50E-01 | Gm29486    | 0,26 | No |

|                    |           |              |           |          |          |               |      |    |
|--------------------|-----------|--------------|-----------|----------|----------|---------------|------|----|
| ENSMUSG00000099338 | -1,69E+00 | -2,267995404 | 4,33E+00  | 3,74E-02 | 2,30E-01 | 2810030D12Rik | 0,31 | No |
| ENSMUSG00000099342 | 2,12E-01  | 1,992951215  | 1,98E+00  | 1,59E-01 | 5,06E-01 | Gm18180       | 1,16 | No |
| ENSMUSG00000099343 | 1,81E+00  | -3,10765737  | 1,28E+00  | 2,58E-01 | 5,50E-01 | Gm28836       | 3,49 | No |
| ENSMUSG00000099353 | 1,85E+00  | -3,107657832 | 1,35E+00  | 2,46E-01 | 5,50E-01 | 1700031M16Rik | 3,61 | No |
| ENSMUSG00000099354 | 8,56E-01  | -1,472995738 | 2,32E+00  | 1,28E-01 | 4,49E-01 | 1700124L16Rik | 1,81 | No |
| ENSMUSG00000099373 | -1,07E-02 | -0,770542362 | 6,81E-04  | 9,79E-01 | 1,00E+00 | Gm19667       | 0,99 | No |
| ENSMUSG00000099375 | -2,83E-01 | 0,984163851  | 1,96E+00  | 1,61E-01 | 5,10E-01 | Gm28187       | 0,82 | No |
| ENSMUSG00000099377 | -5,66E-02 | 4,397952066  | 4,74E-01  | 4,91E-01 | 7,77E-01 | Gm6159        | 0,96 | No |
| ENSMUSG00000099378 | 1,85E+00  | -2,89615486  | 1,34E+00  | 2,47E-01 | 5,50E-01 | 1700067G17Rik | 3,60 | No |
| ENSMUSG00000099381 | -8,22E-01 | -2,929321039 | 3,69E-01  | 5,44E-01 | 8,12E-01 | Gm18303       | 0,57 | No |
| ENSMUSG00000099382 | 3,14E-02  | -3,107617333 | -7,69E-10 | 1,00E+00 | 1,00E+00 | Gm28631       | 1,02 | No |
| ENSMUSG00000099384 | -3,64E-01 | -2,600676044 | 1,67E-01  | 6,83E-01 | 8,95E-01 | 1700110C19Rik | 0,78 | No |
| ENSMUSG00000099385 | -2,69E-01 | 1,29944354   | 1,98E+00  | 1,60E-01 | 5,07E-01 | Gm9540        | 0,83 | No |
| ENSMUSG00000099389 | 7,78E-01  | -2,401344636 | 8,04E-01  | 3,70E-01 | 6,71E-01 | Gm29603       | 1,72 | No |
| ENSMUSG00000099391 | 1,80E-01  | -2,393951187 | 4,32E-02  | 8,35E-01 | 9,80E-01 | 1700003C15Rik | 1,13 | No |
| ENSMUSG00000099397 | -4,49E-02 | 6,835311478  | 5,38E-01  | 4,63E-01 | 7,52E-01 | Gm7809        | 0,97 | No |
| ENSMUSG00000099398 | 3,43E-01  | 1,247961677  | 3,02E+00  | 8,22E-02 | 3,68E-01 | Ms4a14        | 1,27 | No |
| ENSMUSG00000099400 | 7,54E-02  | -1,770498288 | 1,39E-02  | 9,06E-01 | 1,00E+00 | Kat6b-ps1     | 1,05 | No |
| ENSMUSG00000099401 | -1,04E-02 | -2,963271219 | -1,18E-10 | 1,00E+00 | 1,00E+00 | Gm28375       | 0,99 | No |
| ENSMUSG00000099411 | -1,89E+00 | -3,1076441   | 1,42E+00  | 2,33E-01 | 5,50E-01 | 2310015D24Rik | 0,27 | No |
| ENSMUSG00000099413 | -4,06E-01 | 1,738915651  | 7,04E+00  | 7,97E-03 | 7,88E-02 | Gm17767       | 0,75 | No |
| ENSMUSG00000099418 | 7,43E-01  | -2,896145754 | 3,01E-01  | 5,83E-01 | 8,38E-01 | Gm6657        | 1,67 | No |
| ENSMUSG00000099419 | 3,14E-02  | -3,107617333 | -7,69E-10 | 1,00E+00 | 1,00E+00 | 1700001D01Rik | 1,02 | No |
| ENSMUSG00000099420 | -1,94E+00 | -3,107619243 | 1,50E+00  | 2,21E-01 | 5,50E-01 | Gm13279       | 0,26 | No |
| ENSMUSG00000099422 | -2,59E-01 | -2,472892783 | 6,49E-02  | 7,99E-01 | 9,59E-01 | Gm4275        | 0,84 | No |
| ENSMUSG00000099423 | 1,05E-01  | -2,683132615 | 1,05E-02  | 9,18E-01 | 1,00E+00 | Gm17826       | 1,08 | No |
| ENSMUSG00000099428 | 1,71E-01  | -1,424923066 | 1,26E-01  | 7,23E-01 | 9,17E-01 | Gm28155       | 1,13 | No |
| ENSMUSG00000099440 | -1,87E+00 | -3,107637761 | 1,39E+00  | 2,38E-01 | 5,50E-01 | Gm29593       | 0,27 | No |
| ENSMUSG00000099447 | 1,87E+00  | -3,033632735 | 1,36E+00  | 2,43E-01 | 5,50E-01 | 2310030A07Rik | 3,66 | No |
| ENSMUSG00000099448 | 2,63E+00  | -2,963275836 | 2,67E+00  | 1,02E-01 | 3,94E-01 | Gm18801       | 6,19 | No |
| ENSMUSG00000099459 | -2,71E+00 | -2,963182239 | 2,92E+00  | 8,75E-02 | 3,78E-01 | Gm28556       | 0,15 | No |
| ENSMUSG00000099464 | -6,90E-01 | -1,863563159 | 1,09E+00  | 2,97E-01 | 5,93E-01 | Gm5260        | 0,62 | No |



|                    |           |              |          |          |          |               |      |     |
|--------------------|-----------|--------------|----------|----------|----------|---------------|------|-----|
| ENSMUSG00000099465 | -1,22E+00 | -2,497553432 | 1,43E+00 | 2,31E-01 | 5,50E-01 | Gm3830        | 0,43 | No  |
| ENSMUSG00000099470 | -7,99E-01 | -0,725947565 | 4,77E+00 | 2,90E-02 | 1,94E-01 | Gm29340       | 0,57 | No  |
| ENSMUSG00000099471 | -1,77E-01 | 5,595612632  | 6,71E+00 | 9,59E-03 | 9,04E-02 | Gm8451        | 0,88 | No  |
| ENSMUSG00000099472 | 6,84E-01  | -1,107627697 | 1,95E+00 | 1,62E-01 | 5,12E-01 | Gm29539       | 1,61 | No  |
| ENSMUSG00000099474 | -1,27E+00 | -3,146104694 | 7,49E-01 | 3,87E-01 | 6,87E-01 | 1700097N02Rik | 0,42 | No  |
| ENSMUSG00000099478 | -2,04E-01 | 0,002086117  | 5,20E-01 | 4,71E-01 | 7,59E-01 | Gm28370       | 0,87 | No  |
| ENSMUSG00000099481 | 1,32E-01  | 3,415489136  | 1,74E+00 | 1,88E-01 | 5,50E-01 | Xndc1         | 1,10 | No  |
| ENSMUSG00000099488 | -3,54E-02 | 4,905782034  | 2,21E-01 | 6,38E-01 | 8,69E-01 | Gm19774       | 0,98 | No  |
| ENSMUSG00000099492 | -6,22E-02 | 5,36893878   | 7,80E-01 | 3,77E-01 | 6,78E-01 | Gm5525        | 0,96 | No  |
| ENSMUSG00000099510 | 2,17E-01  | 1,227429542  | 1,21E+00 | 2,72E-01 | 5,68E-01 | Gm28501       | 1,16 | No  |
| ENSMUSG00000099511 | 4,10E-01  | -2,770584172 | 1,30E-01 | 7,18E-01 | 9,15E-01 | Topbp1-ps1    | 1,33 | No  |
| ENSMUSG00000099517 | 5,87E-02  | -1,574159276 | 1,00E-02 | 9,20E-01 | 1,00E+00 | Hist1h3g      | 1,04 | No  |
| ENSMUSG00000099518 | -2,70E+00 | -3,033614577 | 2,89E+00 | 8,93E-02 | 3,79E-01 | Gm13275       | 0,15 | No  |
| ENSMUSG00000099519 | 2,90E-01  | 4,16330609   | 1,13E+01 | 7,62E-04 | 1,29E-02 | Gm29253       | 1,22 | Yes |
| ENSMUSG00000099528 | -4,80E-02 | -2,89615251  | 1,06E-03 | 9,74E-01 | 1,00E+00 | 2410012E07Rik | 0,97 | No  |
| ENSMUSG00000099534 | -3,95E-02 | -2,963274761 | 7,08E-04 | 9,79E-01 | 1,00E+00 | Gm28169       | 0,97 | No  |
| ENSMUSG00000099543 | -5,60E-01 | -2,655139509 | 2,46E-01 | 6,20E-01 | 8,57E-01 | Gm29322       | 0,68 | No  |
| ENSMUSG00000099544 | -3,10E-01 | -1,088632223 | 4,38E-01 | 5,08E-01 | 7,92E-01 | Gm18699       | 0,81 | No  |
| ENSMUSG00000099545 | 1,19E+00  | -3,070179505 | 6,63E-01 | 4,15E-01 | 7,11E-01 | Gm13276       | 2,28 | No  |
| ENSMUSG00000099556 | 8,21E-01  | -2,655133647 | 5,87E-01 | 4,44E-01 | 7,35E-01 | Gm28857       | 1,77 | No  |
| ENSMUSG00000099563 | 1,81E+00  | -3,10765737  | 1,28E+00 | 2,58E-01 | 5,50E-01 | Gm19125       | 3,49 | No  |
| ENSMUSG00000099564 | -2,81E-02 | -2,963245656 | 3,59E-04 | 9,85E-01 | 1,00E+00 | Gm28729       | 0,98 | No  |
| ENSMUSG00000099568 | -6,60E-01 | -1,997956325 | 9,19E-01 | 3,38E-01 | 6,38E-01 | Gm28513       | 0,63 | No  |
| ENSMUSG00000099569 | -8,22E-01 | -2,896137491 | 3,70E-01 | 5,43E-01 | 8,12E-01 | Gm18301       | 0,57 | No  |
| ENSMUSG00000099576 | -1,89E+00 | -3,1076441   | 1,42E+00 | 2,33E-01 | 5,50E-01 | Gm29040       | 0,27 | No  |
| ENSMUSG00000099579 | -5,61E-01 | -1,389761647 | 1,04E+00 | 3,09E-01 | 6,07E-01 | 1700120K04Rik | 0,68 | No  |
| ENSMUSG00000099583 | 1,63E-01  | 0,834300429  | 5,62E-01 | 4,53E-01 | 7,43E-01 | Hist1h3d      | 1,12 | No  |
| ENSMUSG00000099587 | 2,17E-01  | -2,730868597 | 2,63E-02 | 8,71E-01 | 1,00E+00 | Gm28967       | 1,16 | No  |
| ENSMUSG00000099590 | 2,61E+00  | -2,963293736 | 2,63E+00 | 1,05E-01 | 3,97E-01 | C330022C24Rik | 6,08 | No  |
| ENSMUSG00000099591 | 2,97E-01  | 0,152154897  | 1,19E+00 | 2,76E-01 | 5,72E-01 | Gm17969       | 1,23 | No  |
| ENSMUSG00000099596 | 8,16E-01  | -2,65515818  | 5,79E-01 | 4,47E-01 | 7,37E-01 | Zbed4-ps3     | 1,76 | No  |
| ENSMUSG00000099600 | 4,40E-01  | -2,832034418 | 1,51E-01 | 6,97E-01 | 9,03E-01 | Gm29126       | 1,36 | No  |

|                    |           |              |           |          |          |               |      |     |
|--------------------|-----------|--------------|-----------|----------|----------|---------------|------|-----|
| ENSMUSG00000099604 | 2,63E+00  | -2,96325892  | 2,67E+00  | 1,02E-01 | 3,94E-01 | Gm6651        | 6,19 | No  |
| ENSMUSG00000099624 | 2,29E-02  | 0,454995619  | 8,13E-03  | 9,28E-01 | 1,00E+00 | Gm7889        | 1,02 | No  |
| ENSMUSG00000099630 | 9,99E-01  | -2,896157102 | 5,82E-01  | 4,45E-01 | 7,36E-01 | 1700096J18Rik | 2,00 | No  |
| ENSMUSG00000099631 | -1,36E-01 | 2,590461709  | 1,21E+00  | 2,71E-01 | 5,68E-01 | Gm8641        | 0,91 | No  |
| ENSMUSG00000099632 | -7,71E-02 | -0,655166397 | 4,29E-02  | 8,36E-01 | 9,80E-01 | 2900093K20Rik | 0,95 | No  |
| ENSMUSG00000099634 | -2,39E-01 | 2,419484232  | 3,26E+00  | 7,12E-02 | 3,38E-01 | Gm29462       | 0,85 | No  |
| ENSMUSG00000099644 | -5,38E-02 | 0,480433844  | 4,64E-02  | 8,29E-01 | 9,77E-01 | Gm28626       | 0,96 | No  |
| ENSMUSG00000099647 | -7,40E-02 | 4,334738283  | 7,90E-01  | 3,74E-01 | 6,75E-01 | Gm5776        | 0,95 | No  |
| ENSMUSG00000099655 | 8,25E-01  | -1,497779572 | 2,35E+00  | 1,25E-01 | 4,43E-01 | 2310034G01Rik | 1,77 | No  |
| ENSMUSG00000099662 | -5,31E-04 | 3,461784827  | 2,70E-05  | 9,96E-01 | 1,00E+00 | Ppp1r2-ps2    | 1,00 | No  |
| ENSMUSG00000099681 | 1,78E-02  | 1,846429953  | 1,28E-02  | 9,10E-01 | 1,00E+00 | 1700052K11Rik | 1,01 | No  |
| ENSMUSG00000099686 | 3,14E-02  | -3,107617333 | -7,69E-10 | 1,00E+00 | 1,00E+00 | Gm29460       | 1,02 | No  |
| ENSMUSG00000099689 | -1,33E-01 | 0,379200711  | 2,74E-01  | 6,01E-01 | 8,47E-01 | Zfp383        | 0,91 | No  |
| ENSMUSG00000099693 | 8,56E-02  | -0,655027483 | 5,13E-02  | 8,21E-01 | 9,72E-01 | Gm29284       | 1,06 | No  |
| ENSMUSG00000099703 | -4,55E-02 | 3,700847248  | 2,28E-01  | 6,33E-01 | 8,65E-01 | Gm28285       | 0,97 | No  |
| ENSMUSG00000099707 | 1,60E+00  | -2,711739863 | 1,75E+00  | 1,86E-01 | 5,50E-01 | Gm8883        | 3,03 | No  |
| ENSMUSG00000099708 | -2,14E-01 | 2,871934207  | 3,19E+00  | 7,39E-02 | 3,46E-01 | Gm29361       | 0,86 | No  |
| ENSMUSG00000099718 | 9,01E-03  | -3,107646452 | -5,16E-10 | 1,00E+00 | 1,00E+00 | Gm2087        | 1,01 | No  |
| ENSMUSG00000099719 | 1,90E-01  | -0,832126442 | 1,93E-01  | 6,60E-01 | 8,82E-01 | Gm28802       | 1,14 | No  |
| ENSMUSG00000099722 | 1,81E+00  | -3,10765737  | 1,28E+00  | 2,58E-01 | 5,50E-01 | Gm29154       | 3,49 | No  |
| ENSMUSG00000099732 | 1,20E-01  | 0,9435311    | 3,18E-01  | 5,73E-01 | 8,32E-01 | Gm17752       | 1,09 | No  |
| ENSMUSG00000099746 | -5,40E-01 | -2,033656695 | 6,37E-01  | 4,25E-01 | 7,19E-01 | Ppnr          | 0,69 | No  |
| ENSMUSG00000099750 | -2,70E+00 | -3,033614577 | 2,89E+00  | 8,93E-02 | 3,79E-01 | Gm18827       | 0,15 | No  |
| ENSMUSG00000099757 | 3,18E-02  | 2,109950182  | 4,50E-02  | 8,32E-01 | 9,78E-01 | BE692007      | 1,02 | No  |
| ENSMUSG00000099759 | -2,31E-01 | -0,548144231 | 3,87E-01  | 5,34E-01 | 8,07E-01 | 1700030C10Rik | 0,85 | No  |
| ENSMUSG00000099760 | 4,16E-01  | 2,39082717   | 9,79E+00  | 1,76E-03 | 2,52E-02 | Gm28800       | 1,33 | Yes |
| ENSMUSG00000099764 | -1,47E-01 | 8,390060059  | 6,48E+00  | 1,09E-02 | 9,96E-02 | Rps10-ps2     | 0,90 | No  |
| ENSMUSG00000099767 | -3,80E-01 | -0,430697542 | 1,19E+00  | 2,75E-01 | 5,71E-01 | Gm28884       | 0,77 | No  |
| ENSMUSG00000099771 | 1,81E+00  | -3,10765737  | 1,28E+00  | 2,58E-01 | 5,50E-01 | Gm19257       | 3,49 | No  |
| ENSMUSG00000099773 | -2,87E-01 | -0,77067498  | 5,17E-01  | 4,72E-01 | 7,60E-01 | Hmgbl1-rs16   | 0,82 | No  |
| ENSMUSG00000099775 | -7,38E-02 | -3,033659033 | 2,66E-03  | 9,59E-01 | 1,00E+00 | Gm5960        | 0,95 | No  |
| ENSMUSG00000099779 | -2,30E-01 | 4,612311683  | 8,47E+00  | 3,62E-03 | 4,40E-02 | Gm8228        | 0,85 | Yes |

|                    |           |              |           |          |          |               |      |     |
|--------------------|-----------|--------------|-----------|----------|----------|---------------|------|-----|
| ENSMUSG00000099796 | -1,87E+00 | -3,107637761 | 1,39E+00  | 2,38E-01 | 5,50E-01 | Gm7893        | 0,27 | No  |
| ENSMUSG00000099797 | -1,24E-01 | 1,718482769  | 5,87E-01  | 4,43E-01 | 7,35E-01 | Gm3145        | 0,92 | No  |
| ENSMUSG00000099811 | -1,89E+00 | -3,1076441   | 1,42E+00  | 2,33E-01 | 5,50E-01 | Gm28411       | 0,27 | No  |
| ENSMUSG00000099816 | 1,81E+00  | -3,10765737  | 1,28E+00  | 2,58E-01 | 5,50E-01 | Gm28552       | 3,49 | No  |
| ENSMUSG00000099819 | 3,12E+00  | -2,896160229 | 3,97E+00  | 4,64E-02 | 2,57E-01 | Gm28728       | 8,68 | No  |
| ENSMUSG00000099825 | -1,72E+00 | -2,497507856 | 2,05E+00  | 1,52E-01 | 4,94E-01 | 1810012K16Rik | 0,30 | No  |
| ENSMUSG00000099835 | 2,65E-01  | 2,036320986  | 3,06E+00  | 8,04E-02 | 3,63E-01 | Gm29668       | 1,20 | No  |
| ENSMUSG00000099842 | 9,01E-03  | -3,107646452 | -5,16E-10 | 1,00E+00 | 1,00E+00 | Gm4034        | 1,01 | No  |
| ENSMUSG00000099843 | -2,37E-01 | 0,647158584  | 1,06E+00  | 3,04E-01 | 6,01E-01 | Gm7160        | 0,85 | No  |
| ENSMUSG00000099847 | -5,38E-02 | -2,185599859 | 4,03E-03  | 9,49E-01 | 1,00E+00 | Gm29458       | 0,96 | No  |
| ENSMUSG00000099851 | 4,17E-02  | 2,145916446  | 8,41E-02  | 7,72E-01 | 9,43E-01 | Gm29542       | 1,03 | No  |
| ENSMUSG00000099858 | 1,08E-02  | 4,616704962  | 1,84E-02  | 8,92E-01 | 1,00E+00 | Gm6652        | 1,01 | No  |
| ENSMUSG00000099869 | 4,58E-01  | -0,084357997 | 2,29E+00  | 1,30E-01 | 4,53E-01 | 1700030F04Rik | 1,37 | No  |
| ENSMUSG00000099870 | -3,09E-02 | 2,255746296  | 4,86E-02  | 8,26E-01 | 9,74E-01 | Gm7200        | 0,98 | No  |
| ENSMUSG00000099872 | 9,01E-03  | -3,107646452 | -5,16E-10 | 1,00E+00 | 1,00E+00 | 1700074H08Rik | 1,01 | No  |
| ENSMUSG00000099874 | 1,34E-01  | 1,221834785  | 4,75E-01  | 4,91E-01 | 7,77E-01 | Gm29629       | 1,10 | No  |
| ENSMUSG00000099875 | -5,86E-02 | 6,884254775  | 9,19E-01  | 3,38E-01 | 6,38E-01 | Rbm3-ps       | 0,96 | No  |
| ENSMUSG00000099878 | 2,63E+00  | -2,963269893 | 2,67E+00  | 1,02E-01 | 3,94E-01 | Gm28178       | 6,19 | No  |
| ENSMUSG00000099879 | -6,40E-02 | -0,912651281 | 2,58E-02  | 8,72E-01 | 1,00E+00 | Gm29123       | 0,96 | No  |
| ENSMUSG00000099881 | 2,87E-02  | 2,543197693  | 5,20E-02  | 8,20E-01 | 9,71E-01 | 2810013P06Rik | 1,02 | No  |
| ENSMUSG00000099891 | -2,31E-01 | -2,636893832 | 5,09E-02  | 8,22E-01 | 9,72E-01 | Gm5575        | 0,85 | No  |
| ENSMUSG00000099901 | -5,56E-01 | -2,832032951 | 2,41E-01  | 6,23E-01 | 8,58E-01 | Zbed4-ps2     | 0,68 | No  |
| ENSMUSG00000099902 | -9,98E-02 | 3,647989103  | 1,08E+00  | 3,00E-01 | 5,96E-01 | Gm12115       | 0,93 | No  |
| ENSMUSG00000099908 | 1,96E-02  | 4,110709244  | 5,09E-02  | 8,22E-01 | 9,72E-01 | Gm28539       | 1,01 | No  |
| ENSMUSG00000099913 | -6,57E-02 | 5,437173301  | 8,88E-01  | 3,46E-01 | 6,47E-01 | Gm28551       | 0,96 | No  |
| ENSMUSG00000099923 | -2,33E-01 | 0,341579024  | 8,34E-01  | 3,61E-01 | 6,62E-01 | 1700105P06Rik | 0,85 | No  |
| ENSMUSG00000099926 | 4,85E-01  | -1,863818598 | 5,91E-01  | 4,42E-01 | 7,34E-01 | Gm6693        | 1,40 | No  |
| ENSMUSG00000099927 | -1,34E-01 | 7,521421843  | 5,14E+00  | 2,34E-02 | 1,67E-01 | Gm8226        | 0,91 | No  |
| ENSMUSG00000099928 | -1,22E+00 | -3,146113954 | 6,96E-01  | 4,04E-01 | 7,01E-01 | Gm29202       | 0,43 | No  |
| ENSMUSG00000099930 | -4,18E-01 | 2,137226384  | 8,78E+00  | 3,04E-03 | 3,87E-02 | Gm2396        | 0,75 | Yes |
| ENSMUSG00000099931 | -1,08E-02 | 1,814532947  | 4,54E-03  | 9,46E-01 | 1,00E+00 | Gm29358       | 0,99 | No  |
| ENSMUSG00000099937 | -4,05E-02 | -2,963228491 | 6,10E-04  | 9,80E-01 | 1,00E+00 | Gm28872       | 0,97 | No  |

|                    |           |              |           |          |          |               |      |     |
|--------------------|-----------|--------------|-----------|----------|----------|---------------|------|-----|
| ENSMUSG00000099946 | 1,77E-02  | -1,472990071 | 1,36E-03  | 9,71E-01 | 1,00E+00 | Gm9496        | 1,01 | No  |
| ENSMUSG00000099950 | 2,59E+00  | -2,963293505 | 2,61E+00  | 1,06E-01 | 3,99E-01 | 9130227L01Rik | 6,03 | No  |
| ENSMUSG00000099951 | 4,93E-01  | -0,535475533 | 1,78E+00  | 1,83E-01 | 5,45E-01 | Gm9226        | 1,41 | No  |
| ENSMUSG00000099954 | -8,48E-01 | -2,832012226 | 3,94E-01  | 5,30E-01 | 8,05E-01 | Gm28112       | 0,56 | No  |
| ENSMUSG00000099958 | -3,83E-02 | -3,107651936 | -7,91E-11 | 1,00E+00 | 1,00E+00 | 1700010B13Rik | 0,97 | No  |
| ENSMUSG00000099964 | 1,06E-01  | -0,954717638 | 6,79E-02  | 7,94E-01 | 9,56E-01 | Gm29514       | 1,08 | No  |
| ENSMUSG00000099966 | -4,16E-02 | 2,036585728  | 8,14E-02  | 7,75E-01 | 9,45E-01 | 2810402E24Rik | 0,97 | No  |
| ENSMUSG00000099968 | -1,86E+00 | -2,448633773 | 4,02E+00  | 4,50E-02 | 2,53E-01 | 1700029J03Rik | 0,28 | No  |
| ENSMUSG00000099969 | -4,13E-02 | -3,033659495 | 7,08E-04  | 9,79E-01 | 1,00E+00 | Gm28960       | 0,97 | No  |
| ENSMUSG00000099974 | -3,29E-01 | 8,174512806  | 3,23E+01  | 1,35E-08 | 9,05E-07 | Bcl2a1d       | 0,80 | Yes |
| ENSMUSG00000099979 | 1,02E+00  | -2,311308768 | 1,69E+00  | 1,94E-01 | 5,50E-01 | Gm5896        | 2,03 | No  |
| ENSMUSG00000099980 | -1,09E-01 | 5,22857333   | 2,31E+00  | 1,28E-01 | 4,50E-01 | Gm5619        | 0,93 | No  |
| ENSMUSG00000099981 | -1,89E+00 | -3,1076441   | 1,42E+00  | 2,33E-01 | 5,50E-01 | Gm21136       | 0,27 | No  |
| ENSMUSG00000099989 | -2,40E-01 | -0,21596696  | 5,65E-01  | 4,52E-01 | 7,42E-01 | Gm20281       | 0,85 | No  |
| ENSMUSG00000099997 | 1,75E-01  | 2,419724389  | 1,70E+00  | 1,92E-01 | 5,50E-01 | Tubb4b-ps2    | 1,13 | No  |
| ENSMUSG00000099998 | 1,33E-01  | 5,794567184  | 3,93E+00  | 4,73E-02 | 2,60E-01 | Gm6501        | 1,10 | No  |
| ENSMUSG00000100002 | -6,87E-02 | -2,770626787 | 3,19E-03  | 9,55E-01 | 1,00E+00 | Gm29642       | 0,95 | No  |
| ENSMUSG00000100004 | 1,85E+00  | -3,107657832 | 1,35E+00  | 2,46E-01 | 5,50E-01 | Taar8c        | 3,61 | No  |
| ENSMUSG00000100007 | 1,17E-01  | 2,334240646  | 7,47E-01  | 3,87E-01 | 6,87E-01 | Gm5527        | 1,08 | No  |
| ENSMUSG00000100009 | 1,55E-01  | 0,229026694  | 3,50E-01  | 5,54E-01 | 8,20E-01 | Gm7967        | 1,11 | No  |
| ENSMUSG00000100017 | 7,58E-02  | 1,341447011  | 1,74E-01  | 6,77E-01 | 8,92E-01 | 2410022M11Rik | 1,05 | No  |
| ENSMUSG00000100018 | -1,77E-01 | 4,873958935  | 5,57E+00  | 1,83E-02 | 1,42E-01 | Gm7776        | 0,88 | No  |
| ENSMUSG00000100019 | -9,45E-01 | -1,522615123 | 2,50E+00  | 1,14E-01 | 4,16E-01 | Gm18766       | 0,52 | No  |
| ENSMUSG00000100021 | -1,31E+00 | -2,83197483  | 1,07E+00  | 3,01E-01 | 5,97E-01 | Gm18697       | 0,40 | No  |
| ENSMUSG00000100025 | 7,54E-01  | -2,896122507 | 3,10E-01  | 5,78E-01 | 8,35E-01 | Gm8141        | 1,69 | No  |
| ENSMUSG00000100029 | 9,98E-03  | -1,146106972 | 3,87E-04  | 9,84E-01 | 1,00E+00 | D7Ertd128e    | 1,01 | No  |
| ENSMUSG00000100033 | -2,19E-01 | 1,164293282  | 1,25E+00  | 2,63E-01 | 5,57E-01 | Gm8337        | 0,86 | No  |
| ENSMUSG00000100037 | 2,83E-01  | 0,077449737  | 9,31E-01  | 3,35E-01 | 6,35E-01 | Gm29103       | 1,22 | No  |
| ENSMUSG00000100039 | -1,33E-01 | 2,038754332  | 8,08E-01  | 3,69E-01 | 6,70E-01 | Gm28959       | 0,91 | No  |
| ENSMUSG00000100046 | -1,25E-01 | -1,413110677 | 5,74E-02  | 8,11E-01 | 9,66E-01 | Gm29232       | 0,92 | No  |
| ENSMUSG00000100060 | 2,42E-01  | -1,060909049 | 3,55E-01  | 5,51E-01 | 8,17E-01 | Gm17944       | 1,18 | No  |
| ENSMUSG00000100071 | 1,24E+00  | -2,355607537 | 2,10E+00  | 1,47E-01 | 4,86E-01 | Gm28707       | 2,37 | No  |

|                    |           |              |           |          |          |               |      |     |
|--------------------|-----------|--------------|-----------|----------|----------|---------------|------|-----|
| ENSMUSG00000100075 | 5,06E-02  | 2,227458287  | 1,30E-01  | 7,18E-01 | 9,15E-01 | 1700018L02Rik | 1,04 | No  |
| ENSMUSG00000100078 | -2,34E-01 | 6,81000049   | 1,46E+01  | 1,30E-04 | 3,02E-03 | Gm6170        | 0,85 | Yes |
| ENSMUSG00000100079 | -3,83E-02 | -3,107651936 | -7,91E-11 | 1,00E+00 | 1,00E+00 | lfnab         | 0,97 | No  |
| ENSMUSG00000100081 | 7,40E-02  | 3,279609289  | 5,06E-01  | 4,77E-01 | 7,65E-01 | Gm29434       | 1,05 | No  |
| ENSMUSG00000100084 | -1,51E-01 | -0,327582971 | 2,05E-01  | 6,51E-01 | 8,76E-01 | 2310068J16Rik | 0,90 | No  |
| ENSMUSG00000100101 | 2,67E+00  | -2,963223118 | 2,76E+00  | 9,68E-02 | 3,88E-01 | Gm29591       | 6,39 | No  |
| ENSMUSG00000100108 | -1,25E+00 | -0,777889899 | 1,03E+01  | 1,34E-03 | 2,05E-02 | Gm28100       | 0,42 | Yes |
| ENSMUSG00000100113 | 1,38E-01  | 2,986840966  | 1,39E+00  | 2,39E-01 | 5,50E-01 | Gm28592       | 1,10 | No  |
| ENSMUSG00000100120 | 2,35E-01  | -1,998098243 | 1,28E-01  | 7,21E-01 | 9,16E-01 | Gm553         | 1,18 | No  |
| ENSMUSG00000100121 | 2,79E-01  | 2,18312089   | 3,78E+00  | 5,19E-02 | 2,78E-01 | 1700025N23Rik | 1,21 | No  |
| ENSMUSG00000100122 | 1,85E+00  | -3,107657832 | 1,35E+00  | 2,46E-01 | 5,50E-01 | Gm28267       | 3,61 | No  |
| ENSMUSG00000100127 | -2,36E-01 | -2,070144165 | 1,10E-01  | 7,40E-01 | 9,27E-01 | Gsdmcl-ps     | 0,85 | No  |
| ENSMUSG00000100129 | -1,89E+00 | -3,1076441   | 1,42E+00  | 2,33E-01 | 5,50E-01 | Gm29064       | 0,27 | No  |
| ENSMUSG00000100130 | 1,77E-02  | 2,017578236  | 1,35E-02  | 9,07E-01 | 1,00E+00 | Gm28379       | 1,01 | No  |
| ENSMUSG00000100131 | 1,09E-01  | 9,857282504  | 3,78E+00  | 5,20E-02 | 2,78E-01 | Gm28439       | 1,08 | No  |
| ENSMUSG00000100135 | 1,81E+00  | -3,10765737  | 1,28E+00  | 2,58E-01 | 5,50E-01 | Gm28643       | 3,49 | No  |
| ENSMUSG00000100141 | -2,84E-01 | 1,38278926   | 2,40E+00  | 1,22E-01 | 4,35E-01 | Gm6445        | 0,82 | No  |
| ENSMUSG00000100146 | 3,16E+00  | -2,963281728 | 4,07E+00  | 4,36E-02 | 2,49E-01 | 1700020M21Rik | 8,92 | No  |
| ENSMUSG00000100147 | -5,06E-01 | -1,378458054 | 1,03E+00  | 3,09E-01 | 6,07E-01 | 1700047M11Rik | 0,70 | No  |
| ENSMUSG00000100150 | 9,01E-03  | -3,107646452 | -5,16E-10 | 1,00E+00 | 1,00E+00 | Gm19585       | 1,01 | No  |
| ENSMUSG00000100153 | 4,98E-02  | 6,937659385  | 6,66E-01  | 4,14E-01 | 7,10E-01 | Gm5601        | 1,04 | No  |
| ENSMUSG00000100154 | -1,01E-01 | -2,401409741 | 1,16E-02  | 9,14E-01 | 1,00E+00 | Gm29052       | 0,93 | No  |
| ENSMUSG00000100157 | -5,45E-02 | -2,832009003 | 1,34E-03  | 9,71E-01 | 1,00E+00 | 2310034O05Rik | 0,96 | No  |
| ENSMUSG00000100158 | -1,94E+00 | -3,107619243 | 1,50E+00  | 2,21E-01 | 5,50E-01 | Gm28119       | 0,26 | No  |
| ENSMUSG00000100160 | -1,93E-01 | 0,773965103  | 7,08E-01  | 4,00E-01 | 6,99E-01 | Gm28527       | 0,87 | No  |
| ENSMUSG00000100162 | 6,05E-02  | -0,94020567  | 2,02E-02  | 8,87E-01 | 1,00E+00 | Gm20687       | 1,04 | No  |
| ENSMUSG00000100164 | -8,63E-02 | 1,019609962  | 1,76E-01  | 6,75E-01 | 8,91E-01 | 2610306M01Rik | 0,94 | No  |
| ENSMUSG00000100170 | 1,87E+00  | -3,107639691 | 1,38E+00  | 2,40E-01 | 5,50E-01 | Gm28942       | 3,67 | No  |
| ENSMUSG00000100174 | 7,63E-01  | -2,896152067 | 3,18E-01  | 5,73E-01 | 8,32E-01 | Gm28719       | 1,70 | No  |
| ENSMUSG00000100176 | -2,64E+00 | -2,963219259 | 2,78E+00  | 9,55E-02 | 3,86E-01 | Gm28586       | 0,16 | No  |
| ENSMUSG00000100178 | -1,19E+00 | -2,997966296 | 6,96E-01  | 4,04E-01 | 7,01E-01 | Gm5267        | 0,44 | No  |
| ENSMUSG00000100182 | -4,52E-01 | 0,281582573  | 2,82E+00  | 9,30E-02 | 3,83E-01 | 1810006J02Rik | 0,73 | No  |

|                    |           |              |          |          |          |               |      |     |
|--------------------|-----------|--------------|----------|----------|----------|---------------|------|-----|
| ENSMUSG00000100183 | 1,70E-01  | -0,098134218 | 2,90E-01 | 5,90E-01 | 8,41E-01 | Gm28512       | 1,13 | No  |
| ENSMUSG00000100188 | -4,64E-03 | -2,896108899 | 6,30E-12 | 1,00E+00 | 1,00E+00 | Gm29561       | 1,00 | No  |
| ENSMUSG00000100189 | 1,10E+00  | -1,600779095 | 3,24E+00 | 7,19E-02 | 3,40E-01 | Gm28096       | 2,14 | No  |
| ENSMUSG00000100199 | -1,99E-01 | 1,225873142  | 1,01E+00 | 3,14E-01 | 6,14E-01 | Gm20324       | 0,87 | No  |
| ENSMUSG00000100201 | 3,32E-01  | 0,833885717  | 2,42E+00 | 1,20E-01 | 4,32E-01 | Gm29093       | 1,26 | No  |
| ENSMUSG00000100204 | 4,99E-02  | 4,848335     | 4,36E-01 | 5,09E-01 | 7,92E-01 | Gm4849        | 1,04 | No  |
| ENSMUSG00000100210 | -2,82E-01 | -1,522788607 | 2,59E-01 | 6,11E-01 | 8,52E-01 | Hist1h3f      | 0,82 | No  |
| ENSMUSG00000100211 | 2,63E+00  | -2,89616029  | 2,68E+00 | 1,02E-01 | 3,94E-01 | 1700064M15Rik | 6,20 | No  |
| ENSMUSG00000100212 | 2,74E-02  | -3,033621357 | 9,16E-12 | 1,00E+00 | 1,00E+00 | Gm5522        | 1,02 | No  |
| ENSMUSG00000100213 | -4,65E-01 | -1,226164603 | 1,10E+00 | 2,94E-01 | 5,89E-01 | Gm28151       | 0,72 | No  |
| ENSMUSG00000100215 | -2,66E-02 | 2,100078383  | 3,40E-02 | 8,54E-01 | 9,92E-01 | Gm8292        | 0,98 | No  |
| ENSMUSG00000100220 | -8,68E-01 | 3,772287876  | 9,00E+01 | 2,43E-21 | 6,29E-19 | Gm29331       | 0,55 | Yes |
| ENSMUSG00000100222 | -7,20E-02 | 3,953528739  | 6,33E-01 | 4,26E-01 | 7,20E-01 | Psmb6-ps2     | 0,95 | No  |
| ENSMUSG00000100225 | -1,89E+00 | -3,1076441   | 1,42E+00 | 2,33E-01 | 5,50E-01 | Gm29097       | 0,27 | No  |
| ENSMUSG00000100228 | -2,69E-01 | 3,436242245  | 7,37E+00 | 6,65E-03 | 6,91E-02 | Gm29257       | 0,83 | No  |
| ENSMUSG00000100234 | 2,64E+00  | -2,832040484 | 2,68E+00 | 1,01E-01 | 3,94E-01 | Gm13277       | 6,21 | No  |
| ENSMUSG00000100235 | 4,44E-01  | 0,419999917  | 3,22E+00 | 7,27E-02 | 3,42E-01 | Gm28557       | 1,36 | No  |
| ENSMUSG00000100241 | -1,87E+00 | -3,107637761 | 1,39E+00 | 2,38E-01 | 5,50E-01 | Slc18a3       | 0,27 | No  |
| ENSMUSG00000100247 | 2,54E+00  | -2,311275572 | 5,83E+00 | 1,58E-02 | 1,30E-01 | A530053M12Rik | 5,83 | No  |
| ENSMUSG00000100253 | -8,63E-01 | -2,832011765 | 4,08E-01 | 5,23E-01 | 8,01E-01 | 1700020N18Rik | 0,55 | No  |
| ENSMUSG00000100254 | -3,69E-01 | 0,168028729  | 1,78E+00 | 1,82E-01 | 5,45E-01 | Trpc2         | 0,77 | No  |
| ENSMUSG00000100255 | -2,67E+00 | -2,831936341 | 2,83E+00 | 9,22E-02 | 3,82E-01 | Gm28196       | 0,16 | No  |
| ENSMUSG00000100257 | -1,47E+00 | -2,998016939 | 1,00E+00 | 3,17E-01 | 6,18E-01 | C4bp-ps1      | 0,36 | No  |
| ENSMUSG00000100261 | 7,45E-02  | 3,161248839  | 4,79E-01 | 4,89E-01 | 7,76E-01 | Gm6473        | 1,05 | No  |
| ENSMUSG00000100269 | -2,71E-01 | -2,600680666 | 7,11E-02 | 7,90E-01 | 9,54E-01 | Gm28782       | 0,83 | No  |
| ENSMUSG00000100277 | -2,68E+00 | -3,033645766 | 2,84E+00 | 9,17E-02 | 3,82E-01 | 1810053B23Rik | 0,16 | No  |
| ENSMUSG00000100280 | -1,60E-02 | 2,589794583  | 1,61E-02 | 8,99E-01 | 1,00E+00 | Gm28417       | 0,99 | No  |
| ENSMUSG00000100281 | 2,10E-01  | -0,574327271 | 3,49E-01 | 5,55E-01 | 8,20E-01 | 4930422M22Rik | 1,16 | No  |
| ENSMUSG00000100282 | 1,87E+00  | -2,963248007 | 1,36E+00 | 2,44E-01 | 5,50E-01 | 1700041C23Rik | 3,65 | No  |
| ENSMUSG00000100287 | 4,14E-01  | -2,832052079 | 1,33E-01 | 7,16E-01 | 9,13E-01 | Gm28068       | 1,33 | No  |
| ENSMUSG00000100291 | -6,78E-01 | -1,711685795 | 1,31E+00 | 2,52E-01 | 5,50E-01 | 2310069B03Rik | 0,63 | No  |
| ENSMUSG00000100302 | 1,85E+00  | -2,963253488 | 1,34E+00 | 2,48E-01 | 5,50E-01 | Gm29670       | 3,59 | No  |

|                    |           |              |           |          |          |               |      |    |
|--------------------|-----------|--------------|-----------|----------|----------|---------------|------|----|
| ENSMUSG00000100306 | -1,03E-01 | -1,750686829 | 2,41E-02  | 8,77E-01 | 1,00E+00 | Gm29362       | 0,93 | No |
| ENSMUSG00000100309 | 4,43E-02  | 4,876929128  | 3,42E-01  | 5,59E-01 | 8,22E-01 | Gm6644        | 1,03 | No |
| ENSMUSG00000100315 | -3,83E-02 | -3,107651936 | -7,91E-11 | 1,00E+00 | 1,00E+00 | 1700031P21Rik | 0,97 | No |
| ENSMUSG00000100319 | 3,23E-02  | 3,067367816  | 8,19E-02  | 7,75E-01 | 9,45E-01 | Gm5256        | 1,02 | No |
| ENSMUSG00000100320 | -9,30E-01 | -2,600628686 | 7,58E-01  | 3,84E-01 | 6,85E-01 | Gm29417       | 0,52 | No |
| ENSMUSG00000100334 | -1,92E+00 | -3,033623267 | 1,46E+00  | 2,27E-01 | 5,50E-01 | C230024C17Rik | 0,26 | No |
| ENSMUSG00000100335 | -3,68E-01 | -2,548261591 | 1,71E-01  | 6,80E-01 | 8,93E-01 | 2310008N11Rik | 0,77 | No |
| ENSMUSG00000100337 | 5,79E-02  | 0,49005361   | 5,40E-02  | 8,16E-01 | 9,69E-01 | Gm5066        | 1,04 | No |
| ENSMUSG00000100340 | -3,83E-02 | -3,107651936 | -7,91E-11 | 1,00E+00 | 1,00E+00 | Gm28923       | 0,97 | No |
| ENSMUSG00000100345 | 1,56E-01  | -1,600691122 | 7,98E-02  | 7,78E-01 | 9,47E-01 | Gm29418       | 1,11 | No |
| ENSMUSG00000100347 | 8,19E-02  | 3,870252527  | 8,16E-01  | 3,66E-01 | 6,67E-01 | Gm7895        | 1,06 | No |
| ENSMUSG00000100349 | 4,69E-01  | -1,963354209 | 4,25E-01  | 5,14E-01 | 7,96E-01 | Gm28188       | 1,38 | No |
| ENSMUSG00000100351 | -3,70E-02 | 0,144539779  | 1,84E-02  | 8,92E-01 | 1,00E+00 | Gm7867        | 0,97 | No |
| ENSMUSG00000100354 | -2,70E+00 | -2,831977245 | 2,89E+00  | 8,91E-02 | 3,79E-01 | Gm29113       | 0,15 | No |
| ENSMUSG00000100361 | 6,03E-01  | -2,311213366 | 4,06E-01  | 5,24E-01 | 8,01E-01 | Gm7063        | 1,52 | No |
| ENSMUSG00000100362 | -9,04E-01 | -1,963267906 | 1,74E+00  | 1,87E-01 | 5,50E-01 | Gm1833        | 0,53 | No |
| ENSMUSG00000100367 | 9,13E-01  | -1,070439374 | 4,86E+00  | 2,75E-02 | 1,87E-01 | Gm29336       | 1,88 | No |
| ENSMUSG00000100382 | 1,79E+00  | -3,033666867 | 1,28E+00  | 2,58E-01 | 5,50E-01 | Gm28924       | 3,46 | No |
| ENSMUSG00000100383 | 1,84E+00  | -2,896131242 | 1,33E+00  | 2,49E-01 | 5,50E-01 | Gm28688       | 3,58 | No |
| ENSMUSG00000100389 | -1,68E-01 | 1,318874297  | 7,87E-01  | 3,75E-01 | 6,76E-01 | Rbm6-ps2      | 0,89 | No |
| ENSMUSG00000100392 | 8,33E-02  | -1,832042734 | 1,53E-02  | 9,01E-01 | 1,00E+00 | Gm28935       | 1,06 | No |
| ENSMUSG00000100393 | -2,36E+00 | -3,033634089 | 2,18E+00  | 1,40E-01 | 4,73E-01 | Gm29491       | 0,19 | No |
| ENSMUSG00000100394 | -2,98E-01 | -1,522660715 | 2,69E-01  | 6,04E-01 | 8,49E-01 | Gm28791       | 0,81 | No |
| ENSMUSG00000100396 | -6,61E-02 | -2,185584279 | 8,10E-03  | 9,28E-01 | 1,00E+00 | Gm29367       | 0,96 | No |
| ENSMUSG00000100397 | -8,91E-02 | 4,648867524  | 1,29E+00  | 2,56E-01 | 5,50E-01 | Gm28071       | 0,94 | No |
| ENSMUSG00000100398 | -5,61E-03 | 2,736102046  | 2,07E-03  | 9,64E-01 | 1,00E+00 | Gm5251        | 1,00 | No |
| ENSMUSG00000100405 | -1,47E-02 | 3,223828     | 1,89E-02  | 8,91E-01 | 1,00E+00 | Gm28911       | 0,99 | No |
| ENSMUSG00000100410 | 1,80E+00  | -2,896183946 | 1,30E+00  | 2,55E-01 | 5,50E-01 | 2310020H05Rik | 3,48 | No |
| ENSMUSG00000100417 | 1,21E-02  | -3,033650469 | 7,34E-11  | 1,00E+00 | 1,00E+00 | Gm28578       | 1,01 | No |
| ENSMUSG00000100426 | -1,71E+00 | -2,548150051 | 3,22E+00  | 7,27E-02 | 3,42E-01 | Gm4208        | 0,31 | No |
| ENSMUSG00000100432 | -1,87E+00 | -3,107637761 | 1,39E+00  | 2,38E-01 | 5,50E-01 | Gm7539        | 0,27 | No |
| ENSMUSG00000100436 | -1,23E+00 | -3,146117124 | 7,12E-01  | 3,99E-01 | 6,98E-01 | Gm29657       | 0,42 | No |

|                    |           |              |          |          |          |               |      |    |
|--------------------|-----------|--------------|----------|----------|----------|---------------|------|----|
| ENSMUSG00000100441 | -1,66E-01 | 4,823129804  | 4,82E+00 | 2,81E-02 | 1,89E-01 | Gm7266        | 0,89 | No |
| ENSMUSG00000100454 | 2,36E-02  | 5,472955469  | 1,16E-01 | 7,33E-01 | 9,23E-01 | Gm28901       | 1,02 | No |
| ENSMUSG00000100455 | 4,67E-01  | 1,356360771  | 6,93E+00 | 8,49E-03 | 8,28E-02 | Gm29170       | 1,38 | No |
| ENSMUSG00000100459 | 3,57E-01  | 1,023286483  | 2,91E+00 | 8,81E-02 | 3,79E-01 | Gm5833        | 1,28 | No |
| ENSMUSG00000100465 | 2,88E-01  | -1,226398388 | 3,95E-01 | 5,29E-01 | 8,05E-01 | Gm29264       | 1,22 | No |
| ENSMUSG00000100480 | -2,86E-01 | -0,929298344 | 3,90E-01 | 5,32E-01 | 8,06E-01 | Gm29156       | 0,82 | No |
| ENSMUSG00000100481 | 1,00E-01  | 4,089599991  | 1,34E+00 | 2,48E-01 | 5,50E-01 | Gm7114        | 1,07 | No |
| ENSMUSG00000100486 | -6,01E-01 | -1,355609469 | 1,21E+00 | 2,72E-01 | 5,69E-01 | Gm4131        | 0,66 | No |
| ENSMUSG00000100490 | 7,18E-01  | -2,770576837 | 2,82E-01 | 5,96E-01 | 8,44E-01 | Gm28455       | 1,65 | No |
| ENSMUSG00000100502 | -1,94E+00 | -3,107619243 | 1,50E+00 | 2,21E-01 | 5,50E-01 | Gm28286       | 0,26 | No |
| ENSMUSG00000100505 | 3,19E-01  | -2,088788086 | 1,87E-01 | 6,65E-01 | 8,85E-01 | Gm13283       | 1,25 | No |
| ENSMUSG00000100510 | -7,18E-01 | -3,07014346  | 2,09E-01 | 6,48E-01 | 8,75E-01 | AV026068      | 0,61 | No |
| ENSMUSG00000100512 | -7,99E-01 | -2,226267127 | 9,31E-01 | 3,35E-01 | 6,35E-01 | Ovol3         | 0,57 | No |
| ENSMUSG00000100514 | 6,83E-02  | 4,794263575  | 7,88E-01 | 3,75E-01 | 6,76E-01 | Gm12960       | 1,05 | No |
| ENSMUSG00000100516 | -1,27E+00 | -3,146104694 | 7,49E-01 | 3,87E-01 | 6,87E-01 | Gm29332       | 0,42 | No |
| ENSMUSG00000100522 | 8,11E-01  | -2,655164508 | 5,72E-01 | 4,49E-01 | 7,40E-01 | Gm19280       | 1,75 | No |
| ENSMUSG00000100536 | -7,60E-02 | -0,541884312 | 4,68E-02 | 8,29E-01 | 9,76E-01 | Gm28873       | 0,95 | No |
| ENSMUSG00000100546 | 2,35E-01  | -2,401359239 | 6,94E-02 | 7,92E-01 | 9,55E-01 | Gm29483       | 1,18 | No |
| ENSMUSG00000100548 | 1,69E-01  | 5,895103051  | 6,50E+00 | 1,08E-02 | 9,87E-02 | Gm29585       | 1,12 | No |
| ENSMUSG00000100550 | -1,39E+00 | -1,655005869 | 5,54E+00 | 1,86E-02 | 1,44E-01 | 2310039L15Rik | 0,38 | No |
| ENSMUSG00000100551 | -2,07E-01 | 4,614769294  | 6,87E+00 | 8,76E-03 | 8,47E-02 | Gm19503       | 0,87 | No |
| ENSMUSG00000100552 | 2,76E-01  | -0,980544163 | 3,90E-01 | 5,32E-01 | 8,06E-01 | Gm29019       | 1,21 | No |
| ENSMUSG00000100554 | -3,17E-01 | 1,002249338  | 2,37E+00 | 1,23E-01 | 4,39E-01 | Gm7690        | 0,80 | No |
| ENSMUSG00000100555 | -4,04E-01 | -1,668918792 | 4,92E-01 | 4,83E-01 | 7,70E-01 | Gm8173        | 0,76 | No |
| ENSMUSG00000100561 | -3,16E+00 | -2,963246013 | 4,20E+00 | 4,04E-02 | 2,38E-01 | Gm7516        | 0,11 | No |
| ENSMUSG00000100572 | 2,33E-01  | -2,497629859 | 6,82E-02 | 7,94E-01 | 9,56E-01 | 2410021H03Rik | 1,18 | No |
| ENSMUSG00000100583 | -4,08E-02 | -2,963255775 | 7,59E-04 | 9,78E-01 | 1,00E+00 | Gm29443       | 0,97 | No |
| ENSMUSG00000100585 | 2,65E+00  | -3,033655087 | 2,73E+00 | 9,86E-02 | 3,91E-01 | 1700108J01Rik | 6,30 | No |
| ENSMUSG00000100590 | 2,85E-01  | -1,54817051  | 2,34E-01 | 6,28E-01 | 8,62E-01 | Gm4785        | 1,22 | No |
| ENSMUSG00000100593 | -1,22E+00 | -3,146113954 | 6,96E-01 | 4,04E-01 | 7,01E-01 | 1700119H24Rik | 0,43 | No |
| ENSMUSG00000100594 | 2,98E-01  | 0,598594082  | 1,56E+00 | 2,12E-01 | 5,50E-01 | 2810414N06Rik | 1,23 | No |
| ENSMUSG00000100595 | 1,87E+00  | -3,107639691 | 1,38E+00 | 2,40E-01 | 5,50E-01 | Gm19087       | 3,67 | No |



|                    |           |              |          |          |          |               |      |    |
|--------------------|-----------|--------------|----------|----------|----------|---------------|------|----|
| ENSMUSG00000100599 | 5,80E-01  | -0,816471064 | 2,10E+00 | 1,47E-01 | 4,86E-01 | 1700120C14Rik | 1,49 | No |
| ENSMUSG00000100602 | -5,30E-01 | -2,107656843 | 4,51E-01 | 5,02E-01 | 7,87E-01 | Gm19498       | 0,69 | No |
| ENSMUSG00000100605 | 1,93E+00  | -2,146155727 | 4,54E+00 | 3,32E-02 | 2,13E-01 | Gm29243       | 3,81 | No |
| ENSMUSG00000100615 | -4,66E-02 | 0,1202179    | 2,97E-02 | 8,63E-01 | 9,97E-01 | Gm5511        | 0,97 | No |
| ENSMUSG00000100620 | -6,29E-02 | -2,832044033 | 1,74E-03 | 9,67E-01 | 1,00E+00 | Gm28277       | 0,96 | No |
| ENSMUSG00000100621 | -1,99E-01 | 2,730630784  | 2,69E+00 | 1,01E-01 | 3,93E-01 | Gm28374       | 0,87 | No |
| ENSMUSG00000100622 | -1,07E-01 | -2,205842449 | 1,58E-02 | 9,00E-01 | 1,00E+00 | Gm20379       | 0,93 | No |
| ENSMUSG00000100625 | -7,41E-01 | -2,548261471 | 6,15E-01 | 4,33E-01 | 7,26E-01 | 1700016G22Rik | 0,60 | No |
| ENSMUSG00000100627 | -4,92E-02 | -2,896164303 | 1,11E-03 | 9,73E-01 | 1,00E+00 | A830008E24Rik | 0,97 | No |
| ENSMUSG00000100629 | -1,15E-01 | 3,139889729  | 1,12E+00 | 2,89E-01 | 5,85E-01 | Gm28192       | 0,92 | No |
| ENSMUSG00000100632 | 6,02E-01  | -0,136336594 | 3,93E+00 | 4,74E-02 | 2,61E-01 | 9430060I03Rik | 1,52 | No |
| ENSMUSG00000100635 | -3,11E-01 | -1,485158325 | 2,71E-01 | 6,03E-01 | 8,48E-01 | Gm29157       | 0,81 | No |
| ENSMUSG00000100636 | -5,56E-01 | -2,770564965 | 2,42E-01 | 6,23E-01 | 8,58E-01 | Gm3551        | 0,68 | No |
| ENSMUSG00000100642 | -1,23E+00 | -3,146117124 | 7,12E-01 | 3,99E-01 | 6,98E-01 | Gm28230       | 0,42 | No |
| ENSMUSG00000100658 | -2,81E-02 | 0,726682114  | 1,59E-02 | 9,00E-01 | 1,00E+00 | F730311O21Rik | 0,98 | No |
| ENSMUSG00000100672 | -7,21E-02 | -2,832047112 | 3,55E-03 | 9,52E-01 | 1,00E+00 | Gm28404       | 0,95 | No |
| ENSMUSG00000100679 | 1,01E-02  | 1,743684989  | 3,84E-03 | 9,51E-01 | 1,00E+00 | Gm28778       | 1,01 | No |
| ENSMUSG00000100680 | -5,76E-01 | -0,042532031 | 3,92E+00 | 4,78E-02 | 2,62E-01 | 1810044D09Rik | 0,67 | No |
| ENSMUSG00000100685 | 8,37E-02  | -0,82414049  | 4,49E-02 | 8,32E-01 | 9,78E-01 | Gm28610       | 1,06 | No |
| ENSMUSG00000100690 | -2,93E-01 | -2,355583714 | 1,28E-01 | 7,21E-01 | 9,16E-01 | Gm4322        | 0,82 | No |
| ENSMUSG00000100691 | -3,81E-02 | 2,116489377  | 6,94E-02 | 7,92E-01 | 9,55E-01 | 2010320M18Rik | 0,97 | No |
| ENSMUSG00000100701 | 3,34E-02  | 5,386754315  | 2,25E-01 | 6,36E-01 | 8,67E-01 | Gm19587       | 1,02 | No |
| ENSMUSG00000100702 | -9,69E-01 | -2,497560403 | 1,14E+00 | 2,86E-01 | 5,82E-01 | Gm8976        | 0,51 | No |
| ENSMUSG00000100711 | 1,23E+00  | -2,770634109 | 9,36E-01 | 3,33E-01 | 6,34E-01 | Gm29461       | 2,34 | No |
| ENSMUSG00000100717 | -1,89E+00 | -2,896152932 | 1,43E+00 | 2,31E-01 | 5,50E-01 | 1700120G07Rik | 0,27 | No |
| ENSMUSG00000100720 | -1,51E-01 | 2,651035067  | 1,47E+00 | 2,25E-01 | 5,50E-01 | Gm10075       | 0,90 | No |
| ENSMUSG00000100732 | -2,22E-01 | 0,214283879  | 6,23E-01 | 4,30E-01 | 7,23E-01 | Topbp1-ps2    | 0,86 | No |
| ENSMUSG00000100738 | 3,14E+00  | -2,896171661 | 4,02E+00 | 4,50E-02 | 2,53E-01 | 2010106C02Rik | 8,80 | No |
| ENSMUSG00000100743 | 1,27E+00  | -2,401442746 | 2,21E+00 | 1,37E-01 | 4,67E-01 | Scgb1b25-ps   | 2,42 | No |
| ENSMUSG00000100744 | 2,28E-01  | 2,435093132  | 2,98E+00 | 8,45E-02 | 3,73E-01 | Gm17764       | 1,17 | No |
| ENSMUSG00000100747 | 9,91E-01  | -1,59654324  | 3,13E+00 | 7,68E-02 | 3,53E-01 | 1700084E18Rik | 1,99 | No |
| ENSMUSG00000100750 | 1,68E-01  | -1,268162067 | 1,22E-01 | 7,27E-01 | 9,19E-01 | Gm29084       | 1,12 | No |

|                    |           |              |          |          |          |               |       |     |
|--------------------|-----------|--------------|----------|----------|----------|---------------|-------|-----|
| ENSMUSG00000100755 | -1,96E-01 | 7,689107892  | 1,11E+01 | 8,63E-04 | 1,43E-02 | Rps23-ps1     | 0,87  | Yes |
| ENSMUSG00000100760 | 6,14E-01  | -1,740857419 | 9,83E-01 | 3,21E-01 | 6,22E-01 | Gm4035        | 1,53  | No  |
| ENSMUSG00000100763 | 7,26E-01  | -1,195801628 | 2,25E+00 | 1,34E-01 | 4,60E-01 | Gm28777       | 1,65  | No  |
| ENSMUSG00000100764 | -6,17E-01 | -1,522590816 | 1,12E+00 | 2,91E-01 | 5,86E-01 | Gm29155       | 0,65  | No  |
| ENSMUSG00000100768 | -8,00E-01 | -2,831954421 | 3,52E-01 | 5,53E-01 | 8,19E-01 | Gm29055       | 0,57  | No  |
| ENSMUSG00000100770 | -3,17E+00 | -2,963252348 | 4,23E+00 | 3,96E-02 | 2,36E-01 | Gm28466       | 0,11  | No  |
| ENSMUSG00000100774 | -2,39E-01 | -1,832039247 | 1,40E-01 | 7,09E-01 | 9,09E-01 | Gm7329        | 0,85  | No  |
| ENSMUSG00000100779 | 4,26E-01  | -0,904339759 | 1,07E+00 | 3,00E-01 | 5,97E-01 | Gm29292       | 1,34  | No  |
| ENSMUSG00000100781 | 2,60E+00  | -2,963275374 | 2,63E+00 | 1,05E-01 | 3,97E-01 | Gm29481       | 6,08  | No  |
| ENSMUSG00000100783 | 7,23E-01  | -1,655189813 | 1,41E+00 | 2,35E-01 | 5,50E-01 | 2310047D07Rik | 1,65  | No  |
| ENSMUSG00000100786 | 3,49E+00  | -2,770684912 | 5,30E+00 | 2,14E-02 | 1,58E-01 | Gm28940       | 11,26 | No  |
| ENSMUSG00000100788 | -4,39E-01 | -0,740921973 | 1,23E+00 | 2,68E-01 | 5,64E-01 | Gm21122       | 0,74  | No  |
| ENSMUSG00000100789 | 7,18E-01  | -2,96326129  | 2,80E-01 | 5,97E-01 | 8,45E-01 | Gm29508       | 1,65  | No  |
| ENSMUSG00000100794 | 3,27E-02  | 1,906884032  | 4,42E-02 | 8,34E-01 | 9,79E-01 | Gm29667       | 1,02  | No  |
| ENSMUSG00000100798 | -6,24E-02 | -1,963200439 | 8,15E-03 | 9,28E-01 | 1,00E+00 | Gm19589       | 0,96  | No  |
| ENSMUSG00000100801 | -1,27E-01 | 9,642881988  | 5,11E+00 | 2,38E-02 | 1,69E-01 | Gm15459       | 0,92  | No  |
| ENSMUSG00000100811 | -1,09E+00 | -2,472897551 | 1,09E+00 | 2,96E-01 | 5,91E-01 | Gm29083       | 0,47  | No  |
| ENSMUSG00000100813 | -6,35E-01 | -1,683198528 | 1,02E+00 | 3,13E-01 | 6,13E-01 | Gm28874       | 0,64  | No  |
| ENSMUSG00000100815 | -1,31E+00 | -2,600627661 | 1,08E+00 | 2,98E-01 | 5,94E-01 | Gm29112       | 0,40  | No  |
| ENSMUSG00000100819 | 7,15E-01  | -2,896175212 | 2,78E-01 | 5,98E-01 | 8,45E-01 | Gm2693        | 1,64  | No  |
| ENSMUSG00000100826 | 1,24E-01  | 3,478806206  | 1,54E+00 | 2,15E-01 | 5,50E-01 | Snhg14        | 1,09  | No  |
| ENSMUSG00000100833 | 2,78E-01  | -1,070009361 | 3,86E-01 | 5,34E-01 | 8,07E-01 | Gm28988       | 1,21  | No  |
| ENSMUSG00000100837 | -3,93E-02 | -2,896146176 | 7,35E-04 | 9,78E-01 | 1,00E+00 | 1700063D05Rik | 0,97  | No  |
| ENSMUSG00000100838 | -3,74E-01 | 7,231051911  | 3,90E+01 | 4,22E-10 | 3,67E-08 | Gm29094       | 0,77  | Yes |
| ENSMUSG00000100839 | -8,17E-02 | 2,520138929  | 3,96E-01 | 5,29E-01 | 8,05E-01 | Gm5920        | 0,94  | No  |
| ENSMUSG00000100846 | -2,89E-01 | -1,879836057 | 1,98E-01 | 6,56E-01 | 8,80E-01 | Gm28845       | 0,82  | No  |
| ENSMUSG00000100860 | -4,94E-01 | -2,015685725 | 4,21E-01 | 5,16E-01 | 7,97E-01 | 2010009K17Rik | 0,71  | No  |
| ENSMUSG00000100862 | 4,09E-02  | 11,3962867   | 5,36E-01 | 4,64E-01 | 7,53E-01 | Gm10925       | 1,03  | No  |
| ENSMUSG00000100863 | -6,36E-02 | 6,404307676  | 1,01E+00 | 3,15E-01 | 6,15E-01 | Gm12669       | 0,96  | No  |
| ENSMUSG00000100865 | -2,81E-01 | 4,98292596   | 1,42E+01 | 1,61E-04 | 3,61E-03 | Gm9320        | 0,82  | Yes |
| ENSMUSG00000100876 | -1,66E-01 | -1,41297474  | 1,03E-01 | 7,49E-01 | 9,31E-01 | 2810454H06Rik | 0,89  | No  |
| ENSMUSG00000100880 | -1,13E+00 | -2,146146514 | 2,51E+00 | 1,13E-01 | 4,14E-01 | Gm6610        | 0,46  | No  |

|                    |           |              |           |          |          |               |      |     |
|--------------------|-----------|--------------|-----------|----------|----------|---------------|------|-----|
| ENSMUSG00000100895 | -2,15E-02 | 1,458746224  | 1,39E-02  | 9,06E-01 | 1,00E+00 | Gm28685       | 0,99 | No  |
| ENSMUSG00000100901 | -6,35E-01 | -2,107675244 | 5,48E-01  | 4,59E-01 | 7,48E-01 | Gm18829       | 0,64 | No  |
| ENSMUSG00000100908 | -1,87E+00 | -3,107637761 | 1,39E+00  | 2,38E-01 | 5,50E-01 | Gm28888       | 0,27 | No  |
| ENSMUSG00000100913 | 9,49E-02  | 3,44525608   | 8,93E-01  | 3,45E-01 | 6,46E-01 | Gm8392        | 1,07 | No  |
| ENSMUSG00000100916 | 7,06E-01  | -2,472975469 | 4,95E-01  | 4,82E-01 | 7,69E-01 | Lhb           | 1,63 | No  |
| ENSMUSG00000100918 | 8,21E-01  | -0,946283766 | 3,82E+00  | 5,07E-02 | 2,73E-01 | Gm19224       | 1,77 | No  |
| ENSMUSG00000100922 | -5,23E-04 | 3,37486598   | 2,61E-05  | 9,96E-01 | 1,00E+00 | Gm8520        | 1,00 | No  |
| ENSMUSG00000100927 | 6,92E-02  | 0,816826136  | 9,87E-02  | 7,53E-01 | 9,33E-01 | Gm28536       | 1,05 | No  |
| ENSMUSG00000100929 | 1,81E+00  | -3,10765737  | 1,28E+00  | 2,58E-01 | 5,50E-01 | Gm28064       | 3,49 | No  |
| ENSMUSG00000100931 | 5,17E-01  | -0,107728193 | 2,72E+00  | 9,91E-02 | 3,92E-01 | Gm28085       | 1,43 | No  |
| ENSMUSG00000100932 | -4,41E-02 | -2,448665265 | 1,82E-03  | 9,66E-01 | 1,00E+00 | Gm29459       | 0,97 | No  |
| ENSMUSG00000100937 | -1,38E-01 | 0,221798331  | 2,76E-01  | 5,99E-01 | 8,46E-01 | 1700020D05Rik | 0,91 | No  |
| ENSMUSG00000100944 | -3,32E-01 | 4,051726933  | 1,46E+01  | 1,33E-04 | 3,09E-03 | Gm28900       | 0,79 | Yes |
| ENSMUSG00000100954 | 1,06E-01  | 3,176888534  | 9,45E-01  | 3,31E-01 | 6,32E-01 | Gm10138       | 1,08 | No  |
| ENSMUSG00000100959 | -1,90E+00 | -3,033594154 | 1,44E+00  | 2,30E-01 | 5,50E-01 | Gm7654        | 0,27 | No  |
| ENSMUSG00000100963 | 3,83E-01  | -1,247033774 | 5,76E-01  | 4,48E-01 | 7,38E-01 | Gm28372       | 1,30 | No  |
| ENSMUSG00000100966 | -5,91E-01 | -2,770595285 | 2,74E-01  | 6,00E-01 | 8,47E-01 | Gm5700        | 0,66 | No  |
| ENSMUSG00000100967 | 6,30E-01  | -1,205837131 | 1,76E+00  | 1,85E-01 | 5,49E-01 | Gm29666       | 1,55 | No  |
| ENSMUSG00000100969 | 1,61E+00  | -2,832011975 | 1,77E+00  | 1,83E-01 | 5,46E-01 | 1700030N03Rik | 3,05 | No  |
| ENSMUSG00000100975 | 4,21E-01  | 2,575791974  | 1,06E+01  | 1,13E-03 | 1,79E-02 | Gm28875       | 1,34 | Yes |
| ENSMUSG00000100985 | -1,49E-01 | -2,107667791 | 4,52E-02  | 8,32E-01 | 9,78E-01 | Gm10640       | 0,90 | No  |
| ENSMUSG00000100992 | -4,15E-01 | -0,943234691 | 8,97E-01  | 3,44E-01 | 6,44E-01 | Gm23925       | 0,75 | No  |
| ENSMUSG00000101007 | 9,01E-03  | -3,107646452 | -5,16E-10 | 1,00E+00 | 1,00E+00 | Gm29541       | 1,01 | No  |
| ENSMUSG00000101008 | -3,83E-02 | -3,107651936 | -7,91E-11 | 1,00E+00 | 1,00E+00 | Gm29442       | 0,97 | No  |
| ENSMUSG00000101009 | -4,08E-02 | -2,963255775 | 7,59E-04  | 9,78E-01 | 1,00E+00 | 1700108F19Rik | 0,97 | No  |
| ENSMUSG00000101013 | -4,57E-01 | 2,770594219  | 1,44E+01  | 1,46E-04 | 3,31E-03 | A630072M18Rik | 0,73 | Yes |
| ENSMUSG00000101014 | 2,32E-01  | -0,755767489 | 3,28E-01  | 5,67E-01 | 8,29E-01 | Gm28289       | 1,17 | No  |
| ENSMUSG00000101023 | 6,99E-01  | -0,510279386 | 3,83E+00  | 5,04E-02 | 2,72E-01 | Gm21152       | 1,62 | No  |
| ENSMUSG00000101024 | 6,14E-01  | -3,070184249 | 1,51E-01  | 6,97E-01 | 9,03E-01 | Gm5692        | 1,53 | No  |
| ENSMUSG00000101026 | 1,87E+00  | -3,033632735 | 1,36E+00  | 2,43E-01 | 5,50E-01 | D730001G18Rik | 3,66 | No  |
| ENSMUSG00000101029 | 8,78E-01  | 1,047120655  | 1,69E+01  | 3,99E-05 | 1,12E-03 | Gm29439       | 1,84 | Yes |
| ENSMUSG00000101037 | -4,50E-02 | -0,655198735 | 1,56E-02  | 9,00E-01 | 1,00E+00 | Gm28424       | 0,97 | No  |

|                    |           |              |          |          |          |               |      |     |
|--------------------|-----------|--------------|----------|----------|----------|---------------|------|-----|
| ENSMUSG00000101049 | 8,26E-02  | 1,630283969  | 2,38E-01 | 6,26E-01 | 8,60E-01 | Gm8856        | 1,06 | No  |
| ENSMUSG00000101051 | 1,87E+00  | -3,107639691 | 1,38E+00 | 2,40E-01 | 5,50E-01 | 1700100L14Rik | 3,67 | No  |
| ENSMUSG00000101061 | -4,03E-01 | -1,929220826 | 3,39E-01 | 5,61E-01 | 8,24E-01 | Platr1        | 0,76 | No  |
| ENSMUSG00000101077 | -8,31E-01 | -2,832018083 | 3,79E-01 | 5,38E-01 | 8,09E-01 | Gm29164       | 0,56 | No  |
| ENSMUSG00000101102 | 1,87E+00  | -3,107639691 | 1,38E+00 | 2,40E-01 | 5,50E-01 | Gm28609       | 3,67 | No  |
| ENSMUSG00000101104 | 9,26E-02  | 1,832924642  | 3,29E-01 | 5,66E-01 | 8,29E-01 | Gm29247       | 1,07 | No  |
| ENSMUSG00000101111 | 3,57E-03  | 10,92038413  | 4,08E-03 | 9,49E-01 | 1,00E+00 | Gm28437       | 1,00 | No  |
| ENSMUSG00000101122 | 1,68E-01  | 0,502415947  | 4,68E-01 | 4,94E-01 | 7,80E-01 | Gm17971       | 1,12 | No  |
| ENSMUSG00000101130 | -2,82E-01 | 0,128356762  | 1,00E+00 | 3,16E-01 | 6,17E-01 | Gm19637       | 0,82 | No  |
| ENSMUSG00000101132 | 8,27E-01  | -2,448718286 | 8,21E-01 | 3,65E-01 | 6,66E-01 | Gm8000        | 1,77 | No  |
| ENSMUSG00000101133 | -2,97E-01 | -0,740726472 | 5,33E-01 | 4,66E-01 | 7,54E-01 | Gm29050       | 0,81 | No  |
| ENSMUSG00000101135 | -1,03E+00 | -1,896154989 | 2,69E+00 | 1,01E-01 | 3,93E-01 | Gm17981       | 0,49 | No  |
| ENSMUSG00000101144 | -1,79E+00 | 0,002339294  | 3,25E+01 | 1,20E-08 | 8,23E-07 | Gm29054       | 0,29 | Yes |
| ENSMUSG00000101152 | -2,99E-01 | -0,350139817 | 8,59E-01 | 3,54E-01 | 6,55E-01 | Gm28305       | 0,81 | No  |
| ENSMUSG00000101156 | 9,60E-01  | -1,929275789 | 1,45E+00 | 2,28E-01 | 5,50E-01 | Gm29114       | 1,94 | No  |
| ENSMUSG00000101162 | -7,51E-02 | 5,451675766  | 1,16E+00 | 2,82E-01 | 5,78E-01 | Gm26728       | 0,95 | No  |
| ENSMUSG00000101163 | -1,08E-01 | -2,896148415 | 8,40E-03 | 9,27E-01 | 1,00E+00 | Gm13278       | 0,93 | No  |
| ENSMUSG00000101166 | 8,23E-02  | 4,178679066  | 8,96E-01 | 3,44E-01 | 6,44E-01 | Gm28496       | 1,06 | No  |
| ENSMUSG00000101167 | 5,54E-02  | -0,972055895 | 1,58E-02 | 9,00E-01 | 1,00E+00 | H2afy3        | 1,04 | No  |
| ENSMUSG00000101168 | -1,86E-02 | -1,24696252  | 1,19E-03 | 9,72E-01 | 1,00E+00 | Gm28892       | 0,99 | No  |
| ENSMUSG00000101171 | 6,41E-01  | -1,998121684 | 8,33E-01 | 3,61E-01 | 6,63E-01 | Gm7593        | 1,56 | No  |
| ENSMUSG00000101172 | -7,54E-01 | -0,770620264 | 3,34E+00 | 6,76E-02 | 3,28E-01 | Gm28535       | 0,59 | No  |
| ENSMUSG00000101174 | -1,23E+00 | -3,146117124 | 7,12E-01 | 3,99E-01 | 6,98E-01 | Hoxd4         | 0,42 | No  |
| ENSMUSG00000101180 | -1,89E+00 | -3,033648118 | 1,42E+00 | 2,33E-01 | 5,50E-01 | Gm2914        | 0,27 | No  |
| ENSMUSG00000101188 | 7,93E-02  | 9,919931349  | 1,99E+00 | 1,59E-01 | 5,06E-01 | Eif4a-ps4     | 1,06 | No  |
| ENSMUSG00000101191 | -4,22E-01 | 0,062449706  | 2,21E+00 | 1,37E-01 | 4,66E-01 | Gm28809       | 0,75 | No  |
| ENSMUSG00000101199 | -1,90E+00 | -3,033594154 | 1,44E+00 | 2,30E-01 | 5,50E-01 | Gm9687        | 0,27 | No  |
| ENSMUSG00000101209 | -6,70E-02 | 4,224158833  | 6,25E-01 | 4,29E-01 | 7,23E-01 | Gm8524        | 0,95 | No  |
| ENSMUSG00000101210 | -7,04E-02 | -2,355590505 | 9,21E-03 | 9,24E-01 | 1,00E+00 | Gm28720       | 0,95 | No  |
| ENSMUSG00000101211 | 1,69E-01  | -1,800995492 | 7,91E-02 | 7,79E-01 | 9,47E-01 | Gm28818       | 1,12 | No  |
| ENSMUSG00000101214 | -1,86E-01 | -2,247095785 | 5,37E-02 | 8,17E-01 | 9,69E-01 | Gm28403       | 0,88 | No  |
| ENSMUSG00000101219 | 6,09E-01  | -1,548148079 | 1,24E+00 | 2,65E-01 | 5,60E-01 | Gm20302       | 1,53 | No  |

|                    |           |              |          |          |          |               |      |     |
|--------------------|-----------|--------------|----------|----------|----------|---------------|------|-----|
| ENSMUSG00000101223 | 5,53E-01  | -1,03368201  | 1,67E+00 | 1,96E-01 | 5,50E-01 | 4930568A12Rik | 1,47 | No  |
| ENSMUSG00000101224 | 8,60E-01  | -2,448727891 | 8,90E-01 | 3,46E-01 | 6,47E-01 | Gm28209       | 1,81 | No  |
| ENSMUSG00000101225 | 1,23E-01  | 1,251723341  | 4,16E-01 | 5,19E-01 | 7,98E-01 | 1700008J07Rik | 1,09 | No  |
| ENSMUSG00000101234 | 7,03E-01  | -2,600746885 | 2,71E-01 | 6,03E-01 | 8,48E-01 | 1700007E05Rik | 1,63 | No  |
| ENSMUSG00000101236 | 2,54E-01  | 3,262864832  | 5,72E+00 | 1,67E-02 | 1,35E-01 | Gm6750        | 1,19 | No  |
| ENSMUSG00000101237 | 1,81E+00  | -3,10765737  | 1,28E+00 | 2,58E-01 | 5,50E-01 | Gm29464       | 3,49 | No  |
| ENSMUSG00000101249 | -1,86E-02 | 11,15493961  | 1,11E-01 | 7,39E-01 | 9,26E-01 | Gm29216       | 0,99 | No  |
| ENSMUSG00000101258 | 2,83E-01  | -1,510101342 | 2,83E-01 | 5,95E-01 | 8,44E-01 | Gm29477       | 1,22 | No  |
| ENSMUSG00000101262 | -1,76E-01 | -0,832032315 | 1,88E-01 | 6,65E-01 | 8,84E-01 | Gm8326        | 0,89 | No  |
| ENSMUSG00000101268 | 5,67E-01  | -2,070200271 | 5,44E-01 | 4,61E-01 | 7,49E-01 | 2010310C07Rik | 1,48 | No  |
| ENSMUSG00000101279 | -6,16E-02 | -0,879887674 | 2,48E-02 | 8,75E-01 | 1,00E+00 | Gm18342       | 0,96 | No  |
| ENSMUSG00000101281 | -3,17E-01 | -1,963271571 | 1,51E-01 | 6,98E-01 | 9,04E-01 | Gm8449        | 0,80 | No  |
| ENSMUSG00000101295 | -2,72E+00 | -2,770561952 | 2,93E+00 | 8,70E-02 | 3,78E-01 | Gm28180       | 0,15 | No  |
| ENSMUSG00000101296 | -1,87E+00 | -3,107637761 | 1,39E+00 | 2,38E-01 | 5,50E-01 | Scgb2b32-ps   | 0,27 | No  |
| ENSMUSG00000101298 | -5,93E-01 | -3,034374803 | 1,29E-01 | 7,19E-01 | 9,15E-01 | Gm28308       | 0,66 | No  |
| ENSMUSG00000101304 | 2,38E-01  | 8,584211984  | 1,70E+01 | 3,67E-05 | 1,04E-03 | Plet1os       | 1,18 | Yes |
| ENSMUSG00000101308 | 2,77E-01  | 0,545128669  | 1,30E+00 | 2,54E-01 | 5,50E-01 | Gm28989       | 1,21 | No  |
| ENSMUSG00000101309 | -5,17E-01 | 0,948095384  | 6,31E+00 | 1,20E-02 | 1,07E-01 | Gm29397       | 0,70 | No  |
| ENSMUSG00000101316 | -6,48E-02 | 3,305247995  | 3,84E-01 | 5,35E-01 | 8,08E-01 | Gm12663       | 0,96 | No  |
| ENSMUSG00000101320 | 9,48E-02  | 1,233538732  | 2,46E-01 | 6,20E-01 | 8,57E-01 | Gm28529       | 1,07 | No  |
| ENSMUSG00000101330 | 9,01E-02  | 4,417901686  | 1,22E+00 | 2,70E-01 | 5,66E-01 | Gm10193       | 1,06 | No  |
| ENSMUSG00000101333 | 4,37E-01  | -2,770601456 | 1,49E-01 | 7,00E-01 | 9,04E-01 | Gm4753        | 1,35 | No  |
| ENSMUSG00000101335 | -5,09E-02 | 0,309701183  | 3,86E-02 | 8,44E-01 | 9,86E-01 | Gm28229       | 0,97 | No  |
| ENSMUSG00000101337 | 5,62E-01  | -2,070192858 | 6,26E-01 | 4,29E-01 | 7,22E-01 | Dnah7c        | 1,48 | No  |
| ENSMUSG00000101348 | -1,33E+00 | -2,831956329 | 1,11E+00 | 2,92E-01 | 5,87E-01 | Gm7135        | 0,40 | No  |
| ENSMUSG00000101355 | 4,92E-01  | -1,683171765 | 7,48E-01 | 3,87E-01 | 6,87E-01 | Hist1h3h      | 1,41 | No  |
| ENSMUSG00000101360 | -2,68E+00 | -3,033645766 | 2,84E+00 | 9,17E-02 | 3,82E-01 | 4933417O13Rik | 0,16 | No  |
| ENSMUSG00000101365 | -5,56E-01 | -1,522711799 | 9,29E-01 | 3,35E-01 | 6,36E-01 | Gm19325       | 0,68 | No  |
| ENSMUSG00000101372 | -5,08E-02 | 3,317840914  | 2,34E-01 | 6,29E-01 | 8,62E-01 | Gm19028       | 0,97 | No  |
| ENSMUSG00000101389 | -3,03E-01 | 3,503458418  | 9,59E+00 | 1,96E-03 | 2,76E-02 | Ms4a4a        | 0,81 | Yes |
| ENSMUSG00000101392 | -4,02E-01 | -1,424933385 | 5,46E-01 | 4,60E-01 | 7,49E-01 | Gm29163       | 0,76 | No  |
| ENSMUSG00000101395 | -3,35E-01 | -1,863721905 | 2,87E-01 | 5,92E-01 | 8,42E-01 | Gm8241        | 0,79 | No  |

|                    |           |              |           |          |          |               |      |     |
|--------------------|-----------|--------------|-----------|----------|----------|---------------|------|-----|
| ENSMUSG00000101398 | -4,08E-01 | -2,600627033 | 1,70E-01  | 6,80E-01 | 8,93E-01 | Gm2617        | 0,75 | No  |
| ENSMUSG00000101404 | 2,65E+00  | -3,033655087 | 2,73E+00  | 9,86E-02 | 3,91E-01 | 1700009C05Rik | 6,30 | No  |
| ENSMUSG00000101413 | 1,06E+00  | -2,311172464 | 1,45E+00  | 2,29E-01 | 5,50E-01 | Gm29485       | 2,09 | No  |
| ENSMUSG00000101431 | 4,63E-01  | 4,351878823  | 3,03E+01  | 3,67E-08 | 2,24E-06 | Gm7901        | 1,38 | Yes |
| ENSMUSG00000101433 | -3,17E+00 | -2,896136416 | 4,22E+00  | 4,00E-02 | 2,37E-01 | Gm29441       | 0,11 | No  |
| ENSMUSG00000101437 | 4,31E-01  | -2,655199934 | 1,45E-01  | 7,03E-01 | 9,06E-01 | Gm29454       | 1,35 | No  |
| ENSMUSG00000101438 | -1,02E-01 | 4,285327874  | 1,48E+00  | 2,24E-01 | 5,50E-01 | Gm19412       | 0,93 | No  |
| ENSMUSG00000101439 | -3,19E-01 | 2,739689072  | 7,41E+00  | 6,48E-03 | 6,78E-02 | Gm336         | 0,80 | No  |
| ENSMUSG00000101449 | -2,15E-02 | 1,499639999  | 1,54E-02  | 9,01E-01 | 1,00E+00 | Gm17791       | 0,99 | No  |
| ENSMUSG00000101450 | -2,27E-01 | 1,422729719  | 1,49E+00  | 2,23E-01 | 5,50E-01 | Gm28941       | 0,85 | No  |
| ENSMUSG00000101451 | -1,25E+00 | -2,998029996 | 7,23E-01  | 3,95E-01 | 6,96E-01 | Gm29430       | 0,42 | No  |
| ENSMUSG00000101452 | -1,09E-01 | 1,421011648  | 3,65E-01  | 5,46E-01 | 8,14E-01 | Gm28530       | 0,93 | No  |
| ENSMUSG00000101462 | 1,61E-02  | 0,979850373  | 6,24E-03  | 9,37E-01 | 1,00E+00 | Gm3052        | 1,01 | No  |
| ENSMUSG00000101464 | 3,99E-02  | 3,739099472  | 1,76E-01  | 6,74E-01 | 8,90E-01 | Gm7436        | 1,03 | No  |
| ENSMUSG00000101476 | -4,69E-02 | -2,832023512 | 1,46E-03  | 9,70E-01 | 1,00E+00 | Gm29570       | 0,97 | No  |
| ENSMUSG00000101482 | -2,22E-02 | 1,015224991  | 1,16E-02  | 9,14E-01 | 1,00E+00 | Gm28883       | 0,98 | No  |
| ENSMUSG00000101493 | 8,82E-02  | -0,740753161 | 5,33E-02  | 8,17E-01 | 9,70E-01 | 2810405F17Rik | 1,06 | No  |
| ENSMUSG00000101496 | -1,31E+00 | -2,711683473 | 1,07E+00  | 3,00E-01 | 5,97E-01 | Gm8885        | 0,40 | No  |
| ENSMUSG00000101501 | 5,43E-01  | -1,929313781 | 6,69E-01  | 4,13E-01 | 7,09E-01 | Rps27a-ps1    | 1,46 | No  |
| ENSMUSG00000101502 | -1,84E-01 | 2,209274503  | 1,79E+00  | 1,81E-01 | 5,43E-01 | Rpl7a-ps10    | 0,88 | No  |
| ENSMUSG00000101503 | -1,34E-01 | 2,661790915  | 1,19E+00  | 2,75E-01 | 5,71E-01 | Gm28364       | 0,91 | No  |
| ENSMUSG00000101505 | 5,61E-01  | -2,070213887 | 7,16E-01  | 3,97E-01 | 6,98E-01 | 1700109G14Rik | 1,48 | No  |
| ENSMUSG00000101511 | -1,89E+00 | -3,1076441   | 1,42E+00  | 2,33E-01 | 5,50E-01 | Gm5681        | 0,27 | No  |
| ENSMUSG00000101517 | 2,16E+00  | -2,655104959 | 3,73E+00  | 5,34E-02 | 2,82E-01 | 4732465J04Rik | 4,47 | No  |
| ENSMUSG00000101519 | 1,20E-01  | 1,116604666  | 3,78E-01  | 5,39E-01 | 8,09E-01 | Ska2l-ps      | 1,09 | No  |
| ENSMUSG00000101523 | -1,01E-01 | 6,404496569  | 2,58E+00  | 1,08E-01 | 4,03E-01 | Gm10031       | 0,93 | No  |
| ENSMUSG00000101532 | 9,01E-03  | -3,107646452 | -5,16E-10 | 1,00E+00 | 1,00E+00 | Zbed4-ps1     | 1,01 | No  |
| ENSMUSG00000101535 | 3,67E-02  | -2,963207527 | 2,07E-11  | 1,00E+00 | 1,00E+00 | Gm29383       | 1,03 | No  |
| ENSMUSG00000101540 | 1,85E+00  | -3,107657832 | 1,35E+00  | 2,46E-01 | 5,50E-01 | Gm28465       | 3,61 | No  |
| ENSMUSG00000101545 | -2,36E+00 | -3,070158091 | 2,17E+00  | 1,41E-01 | 4,74E-01 | Gm4373        | 0,20 | No  |
| ENSMUSG00000101555 | 1,31E-02  | 2,6897502    | 1,12E-02  | 9,16E-01 | 1,00E+00 | Gm28731       | 1,01 | No  |
| ENSMUSG00000101556 | 2,36E-02  | 0,563264794  | 9,73E-03  | 9,21E-01 | 1,00E+00 | Gm28869       | 1,02 | No  |

|                    |           |              |          |          |          |               |       |     |
|--------------------|-----------|--------------|----------|----------|----------|---------------|-------|-----|
| ENSMUSG00000101563 | 1,24E+00  | -2,600735497 | 9,56E-01 | 3,28E-01 | 6,29E-01 | Gm7364        | 2,37  | No  |
| ENSMUSG00000101564 | 1,73E+00  | -2,226334404 | 3,46E+00 | 6,27E-02 | 3,12E-01 | Gm5703        | 3,32  | No  |
| ENSMUSG00000101567 | -6,37E-02 | 6,766424367  | 1,07E+00 | 3,01E-01 | 5,98E-01 | Txn-ps1       | 0,96  | No  |
| ENSMUSG00000101568 | -1,87E+00 | -3,107637761 | 1,39E+00 | 2,38E-01 | 5,50E-01 | 1700040F17Rik | 0,27  | No  |
| ENSMUSG00000101571 | 4,08E+00  | -2,655162117 | 8,17E+00 | 4,26E-03 | 4,95E-02 | Gm6187        | 16,97 | Yes |
| ENSMUSG00000101574 | -7,42E-01 | -2,146096889 | 9,36E-01 | 3,33E-01 | 6,34E-01 | 1700112H15Rik | 0,60  | No  |
| ENSMUSG00000101579 | 3,57E-02  | 0,160118447  | 1,61E-02 | 8,99E-01 | 1,00E+00 | Gm21181       | 1,03  | No  |
| ENSMUSG00000101581 | -6,13E-01 | -2,070056659 | 7,30E-01 | 3,93E-01 | 6,93E-01 | C430002N11Rik | 0,65  | No  |
| ENSMUSG00000101583 | -4,02E-02 | -2,448666933 | 1,52E-03 | 9,69E-01 | 1,00E+00 | Gm20753       | 0,97  | No  |
| ENSMUSG00000101585 | 2,98E-02  | 1,015229746  | 1,99E-02 | 8,88E-01 | 1,00E+00 | 1600010M07Rik | 1,02  | No  |
| ENSMUSG00000101586 | 3,50E-01  | 0,511234464  | 2,18E+00 | 1,40E-01 | 4,72E-01 | Gm29017       | 1,27  | No  |
| ENSMUSG00000101587 | 1,59E-01  | -0,711685617 | 1,79E-01 | 6,72E-01 | 8,89E-01 | Gm29036       | 1,12  | No  |
| ENSMUSG00000101589 | 7,17E-02  | 4,420690626  | 7,78E-01 | 3,78E-01 | 6,78E-01 | Rbm6-ps1      | 1,05  | No  |
| ENSMUSG00000101595 | 2,32E-01  | -1,770710658 | 1,82E-01 | 6,70E-01 | 8,88E-01 | Gm29395       | 1,17  | No  |
| ENSMUSG00000101597 | -3,33E-01 | 2,993931549  | 8,80E+00 | 3,02E-03 | 3,85E-02 | Gm28555       | 0,79  | Yes |
| ENSMUSG00000101599 | -1,31E-01 | 1,361884725  | 5,50E-01 | 4,58E-01 | 7,47E-01 | Gm20342       | 0,91  | No  |
| ENSMUSG00000101609 | 5,17E-02  | 3,415140335  | 2,59E-01 | 6,11E-01 | 8,52E-01 | Kcnq1ot1      | 1,04  | No  |
| ENSMUSG00000101612 | -5,96E-02 | 0,678183963  | 6,19E-02 | 8,04E-01 | 9,62E-01 | Gm7933        | 0,96  | No  |
| ENSMUSG00000101615 | 5,75E-01  | -2,448707018 | 3,68E-01 | 5,44E-01 | 8,13E-01 | Gm8495        | 1,49  | No  |
| ENSMUSG00000101617 | 1,81E+00  | -3,10765737  | 1,28E+00 | 2,58E-01 | 5,50E-01 | Gm6947        | 3,49  | No  |
| ENSMUSG00000101625 | 8,40E-01  | -2,448690466 | 8,48E-01 | 3,57E-01 | 6,58E-01 | Gm29371       | 1,79  | No  |
| ENSMUSG00000101628 | -2,47E-01 | 5,312852539  | 1,24E+01 | 4,22E-04 | 7,98E-03 | Gm28177       | 0,84  | Yes |
| ENSMUSG00000101630 | -1,91E+00 | -2,998017434 | 1,45E+00 | 2,29E-01 | 5,50E-01 | Gm29261       | 0,27  | No  |
| ENSMUSG00000101634 | -1,25E+00 | -2,548203524 | 1,50E+00 | 2,21E-01 | 5,50E-01 | 1700066B17Rik | 0,42  | No  |
| ENSMUSG00000101639 | -8,63E-01 | -2,448677545 | 8,70E-01 | 3,51E-01 | 6,52E-01 | Gm8597        | 0,55  | No  |
| ENSMUSG00000101640 | -1,89E+00 | -2,963194883 | 1,43E+00 | 2,32E-01 | 5,50E-01 | Gm28376       | 0,27  | No  |
| ENSMUSG00000101641 | -3,88E-03 | -3,03362684  | 4,02E-12 | 1,00E+00 | 1,00E+00 | Gm29560       | 1,00  | No  |
| ENSMUSG00000101645 | 1,66E-01  | 6,336603542  | 6,89E+00 | 8,69E-03 | 8,42E-02 | Gm28635       | 1,12  | No  |
| ENSMUSG00000101651 | -6,42E-01 | -1,257454844 | 1,75E+00 | 1,86E-01 | 5,50E-01 | Gm28402       | 0,64  | No  |
| ENSMUSG00000101655 | -7,47E-02 | 1,313689925  | 1,57E-01 | 6,92E-01 | 9,00E-01 | 2310040G24Rik | 0,95  | No  |
| ENSMUSG00000101656 | 7,76E-01  | -2,831979109 | 3,27E-01 | 5,67E-01 | 8,29E-01 | Gm8004        | 1,71  | No  |
| ENSMUSG00000101660 | 1,93E-01  | 1,191393769  | 9,99E-01 | 3,18E-01 | 6,18E-01 | Gm18666       | 1,14  | No  |

|                    |           |              |           |          |          |               |      |    |
|--------------------|-----------|--------------|-----------|----------|----------|---------------|------|----|
| ENSMUSG00000101662 | -1,13E-01 | -2,655171849 | 1,18E-02  | 9,13E-01 | 1,00E+00 | Gm28499       | 0,92 | No |
| ENSMUSG00000101671 | -1,47E+00 | -2,998020776 | 1,01E+00  | 3,15E-01 | 6,16E-01 | Gm28221       | 0,36 | No |
| ENSMUSG00000101674 | -8,75E-02 | 1,725249049  | 2,88E-01  | 5,92E-01 | 8,42E-01 | 4930444A19Rik | 0,94 | No |
| ENSMUSG00000101678 | -1,84E-02 | 5,038679357  | 6,23E-02  | 8,03E-01 | 9,62E-01 | Gm29609       | 0,99 | No |
| ENSMUSG00000101680 | -1,65E+00 | -2,853472369 | 1,33E+00  | 2,49E-01 | 5,50E-01 | Gm29015       | 0,32 | No |
| ENSMUSG00000101682 | -5,62E-01 | -2,600666425 | 2,48E-01  | 6,18E-01 | 8,56E-01 | Gm29228       | 0,68 | No |
| ENSMUSG00000101685 | 9,54E-02  | 3,027731734  | 7,38E-01  | 3,90E-01 | 6,90E-01 | Gm17837       | 1,07 | No |
| ENSMUSG00000101687 | -7,25E-03 | 3,288998089  | 4,78E-03  | 9,45E-01 | 1,00E+00 | Gm4854        | 0,99 | No |
| ENSMUSG00000101693 | -1,98E-02 | -3,033655952 | 2,83E-11  | 1,00E+00 | 1,00E+00 | Gm19461       | 0,99 | No |
| ENSMUSG00000101695 | 3,65E-01  | 1,525104412  | 4,19E+00  | 4,08E-02 | 2,39E-01 | 1700094J05Rik | 1,29 | No |
| ENSMUSG00000101698 | -3,04E-03 | -0,24721181  | 8,80E-05  | 9,93E-01 | 1,00E+00 | Gm29562       | 1,00 | No |
| ENSMUSG00000101708 | -8,24E-01 | -2,770562742 | 3,73E-01  | 5,41E-01 | 8,11E-01 | Gm28453       | 0,56 | No |
| ENSMUSG00000101711 | 6,65E-02  | 3,027458924  | 3,42E-01  | 5,59E-01 | 8,22E-01 | Gm28306       | 1,05 | No |
| ENSMUSG00000101716 | 3,02E-01  | 1,062838305  | 2,12E+00  | 1,45E-01 | 4,83E-01 | Gm12057       | 1,23 | No |
| ENSMUSG00000101722 | -1,66E-01 | -1,300284595 | 1,06E-01  | 7,45E-01 | 9,29E-01 | Gm29125       | 0,89 | No |
| ENSMUSG00000101724 | -1,89E+00 | -3,1076441   | 1,42E+00  | 2,33E-01 | 5,50E-01 | Gm29453       | 0,27 | No |
| ENSMUSG00000101726 | -1,89E+00 | -3,1076441   | 1,42E+00  | 2,33E-01 | 5,50E-01 | Gm7858        | 0,27 | No |
| ENSMUSG00000101729 | -6,68E-02 | -2,401425633 | 7,21E-03  | 9,32E-01 | 1,00E+00 | Gm17796       | 0,95 | No |
| ENSMUSG00000101730 | 3,14E-02  | -3,107617333 | -7,69E-10 | 1,00E+00 | 1,00E+00 | Gm28580       | 1,02 | No |
| ENSMUSG00000101731 | -8,78E-01 | -1,510123103 | 2,48E+00  | 1,16E-01 | 4,21E-01 | 3830432H09Rik | 0,54 | No |
| ENSMUSG00000101741 | -1,93E+00 | -2,963244023 | 1,47E+00  | 2,25E-01 | 5,50E-01 | Gm28055       | 0,26 | No |
| ENSMUSG00000101746 | 1,86E+00  | -2,963235356 | 1,35E+00  | 2,46E-01 | 5,50E-01 | 2310043L19Rik | 3,62 | No |
| ENSMUSG00000101750 | -5,66E-01 | -2,548238591 | 2,51E-01  | 6,16E-01 | 8,55E-01 | Olfr1392      | 0,68 | No |
| ENSMUSG00000101751 | -7,89E-01 | 0,15110281   | 8,08E+00  | 4,48E-03 | 5,14E-02 | Gm2427        | 0,58 | No |
| ENSMUSG00000101778 | 4,55E-01  | -0,247200343 | 1,88E+00  | 1,70E-01 | 5,26E-01 | Gm29488       | 1,37 | No |
| ENSMUSG00000101784 | 1,01E-01  | 1,185472497  | 2,62E-01  | 6,09E-01 | 8,51E-01 | Gm7553        | 1,07 | No |
| ENSMUSG00000101792 | -7,45E-01 | -2,548207335 | 6,22E-01  | 4,30E-01 | 7,24E-01 | Gm28447       | 0,60 | No |
| ENSMUSG00000101793 | 9,01E-03  | -3,107646452 | -5,16E-10 | 1,00E+00 | 1,00E+00 | Gm28500       | 1,01 | No |
| ENSMUSG00000101795 | -1,25E-01 | 9,180406016  | 4,86E+00  | 2,75E-02 | 1,87E-01 | Gm5835        | 0,92 | No |
| ENSMUSG00000101798 | 2,05E-01  | -2,448717607 | 5,25E-02  | 8,19E-01 | 9,71E-01 | Gm28995       | 1,15 | No |
| ENSMUSG00000101800 | -1,49E-01 | 2,599008685  | 1,39E+00  | 2,38E-01 | 5,50E-01 | Rnf170-ps     | 0,90 | No |
| ENSMUSG00000101801 | 2,08E-01  | -1,510191449 | 1,28E-01  | 7,21E-01 | 9,16E-01 | 1700020G17Rik | 1,15 | No |



|                    |           |              |          |          |          |               |      |    |
|--------------------|-----------|--------------|----------|----------|----------|---------------|------|----|
| ENSMUSG00000101813 | 1,68E-01  | -2,740870572 | 2,39E-02 | 8,77E-01 | 1,00E+00 | Gm28503       | 1,12 | No |
| ENSMUSG00000101814 | -1,98E-01 | 2,502499133  | 2,42E+00 | 1,20E-01 | 4,31E-01 | Gm17807       | 0,87 | No |
| ENSMUSG00000101823 | -6,07E-01 | -0,668903378 | 2,58E+00 | 1,08E-01 | 4,03E-01 | Gm29438       | 0,66 | No |
| ENSMUSG00000101828 | 6,19E-01  | -2,35553458  | 4,27E-01 | 5,14E-01 | 7,96E-01 | D130051D11Rik | 1,54 | No |
| ENSMUSG00000101832 | 1,87E+00  | -3,107639691 | 1,38E+00 | 2,40E-01 | 5,50E-01 | Gm28982       | 3,67 | No |
| ENSMUSG00000101834 | 1,20E-01  | 0,152075558  | 1,88E-01 | 6,64E-01 | 8,84E-01 | Gm5829        | 1,09 | No |
| ENSMUSG00000101838 | 1,06E-01  | -2,811463146 | 7,23E-03 | 9,32E-01 | 1,00E+00 | Gm18800       | 1,08 | No |
| ENSMUSG00000101840 | -3,56E-02 | -2,863734661 | 7,13E-04 | 9,79E-01 | 1,00E+00 | Gm28294       | 0,98 | No |
| ENSMUSG00000101841 | -1,90E-03 | 3,648680291  | 3,82E-04 | 9,84E-01 | 1,00E+00 | Gm11993       | 1,00 | No |
| ENSMUSG00000101845 | 5,64E-02  | 1,911303019  | 1,34E-01 | 7,14E-01 | 9,12E-01 | Gm28198       | 1,04 | No |
| ENSMUSG00000101847 | 5,73E-01  | -0,600706777 | 2,27E+00 | 1,32E-01 | 4,56E-01 | Gm20749       | 1,49 | No |
| ENSMUSG00000101848 | 4,10E-01  | -0,711823232 | 9,69E-01 | 3,25E-01 | 6,26E-01 | 4933417E11Rik | 1,33 | No |
| ENSMUSG00000101849 | -1,90E+00 | -3,033594154 | 1,44E+00 | 2,30E-01 | 5,50E-01 | Gm28386       | 0,27 | No |
| ENSMUSG00000101853 | 7,44E-01  | -2,963286135 | 3,02E-01 | 5,83E-01 | 8,38E-01 | Gm28627       | 1,67 | No |
| ENSMUSG00000101854 | -4,27E-01 | -2,033674215 | 3,79E-01 | 5,38E-01 | 8,09E-01 | 1700026F02Rik | 0,74 | No |
| ENSMUSG00000101855 | -1,92E+00 | -2,770619434 | 1,45E+00 | 2,28E-01 | 5,50E-01 | 1700010N08Rik | 0,26 | No |
| ENSMUSG00000101856 | -5,97E-01 | 0,616226787  | 5,92E+00 | 1,50E-02 | 1,25E-01 | 1700096K18Rik | 0,66 | No |
| ENSMUSG00000101859 | -1,23E-01 | 4,724882953  | 2,35E+00 | 1,26E-01 | 4,44E-01 | Gm29233       | 0,92 | No |
| ENSMUSG00000101860 | 1,22E+00  | -3,146114919 | 6,90E-01 | 4,06E-01 | 7,02E-01 | Mindy4b-ps    | 2,33 | No |
| ENSMUSG00000101862 | 1,65E-02  | 3,351225715  | 2,54E-02 | 8,73E-01 | 1,00E+00 | Gm8918        | 1,01 | No |
| ENSMUSG00000101865 | 2,13E-01  | -1,472884609 | 1,69E-01 | 6,81E-01 | 8,94E-01 | Gm9775        | 1,16 | No |
| ENSMUSG00000101867 | -1,17E-01 | 0,505469332  | 2,12E-01 | 6,46E-01 | 8,73E-01 | C78334        | 0,92 | No |
| ENSMUSG00000101872 | 1,92E-01  | 0,844099364  | 7,96E-01 | 3,72E-01 | 6,74E-01 | Gm29237       | 1,14 | No |
| ENSMUSG00000101875 | -1,39E+00 | -2,896103981 | 1,22E+00 | 2,70E-01 | 5,66E-01 | Gm6028        | 0,38 | No |
| ENSMUSG00000101878 | -5,47E-02 | 7,548113116  | 8,56E-01 | 3,55E-01 | 6,56E-01 | Gm8203        | 0,96 | No |
| ENSMUSG00000101880 | -2,95E-01 | -1,165694545 | 3,95E-01 | 5,29E-01 | 8,05E-01 | Gm29282       | 0,82 | No |
| ENSMUSG00000101892 | -7,92E-02 | 4,689528738  | 1,04E+00 | 3,08E-01 | 6,06E-01 | 9130401M01Rik | 0,95 | No |
| ENSMUSG00000101895 | 1,57E+00  | -2,770663523 | 1,69E+00 | 1,93E-01 | 5,50E-01 | Gm28981       | 2,98 | No |
| ENSMUSG00000101903 | -5,37E-01 | -2,355627451 | 4,63E-01 | 4,96E-01 | 7,82E-01 | Gm29291       | 0,69 | No |
| ENSMUSG00000101904 | 3,21E-01  | 1,028139743  | 2,27E+00 | 1,32E-01 | 4,56E-01 | Gm29427       | 1,25 | No |
| ENSMUSG00000101921 | -9,42E-01 | -2,497596623 | 7,78E-01 | 3,78E-01 | 6,79E-01 | Gm28825       | 0,52 | No |
| ENSMUSG00000101925 | 1,85E+00  | -3,107657832 | 1,35E+00 | 2,46E-01 | 5,50E-01 | Gm28156       | 3,61 | No |

|                    |           |              |          |          |          |               |      |     |
|--------------------|-----------|--------------|----------|----------|----------|---------------|------|-----|
| ENSMUSG00000101932 | -2,03E-01 | 2,02404459   | 1,84E+00 | 1,75E-01 | 5,33E-01 | Gm10074       | 0,87 | No  |
| ENSMUSG00000101934 | -1,98E-02 | -3,033655952 | 2,83E-11 | 1,00E+00 | 1,00E+00 | Gm18304       | 0,99 | No  |
| ENSMUSG00000101935 | 3,12E-01  | 0,229336224  | 1,09E+00 | 2,96E-01 | 5,92E-01 | Gm17748       | 1,24 | No  |
| ENSMUSG00000101939 | 1,08E-02  | 7,527528596  | 3,34E-02 | 8,55E-01 | 9,92E-01 | Gm28438       | 1,01 | No  |
| ENSMUSG00000101940 | 4,25E-01  | -2,832034501 | 1,40E-01 | 7,08E-01 | 9,09E-01 | Akp-ps1       | 1,34 | No  |
| ENSMUSG00000101942 | 3,21E-02  | -0,300413114 | 8,43E-03 | 9,27E-01 | 1,00E+00 | Gm19582       | 1,02 | No  |
| ENSMUSG00000101952 | -3,82E-02 | 2,563077325  | 9,14E-02 | 7,62E-01 | 9,38E-01 | Gm10550       | 0,97 | No  |
| ENSMUSG00000101955 | 1,85E+00  | -3,107657832 | 1,35E+00 | 2,46E-01 | 5,50E-01 | Gm29376       | 3,61 | No  |
| ENSMUSG00000101958 | 1,81E+00  | -3,10765737  | 1,28E+00 | 2,58E-01 | 5,50E-01 | Gm19085       | 3,49 | No  |
| ENSMUSG00000101959 | -8,70E-01 | -1,522541974 | 2,31E+00 | 1,29E-01 | 4,50E-01 | Ldhal6b       | 0,55 | No  |
| ENSMUSG00000101963 | 2,12E-01  | -0,510080528 | 3,57E-01 | 5,50E-01 | 8,17E-01 | 1700001J11Rik | 1,16 | No  |
| ENSMUSG00000101964 | -1,87E+00 | -3,033619006 | 1,41E+00 | 2,36E-01 | 5,50E-01 | Gm28693       | 0,27 | No  |
| ENSMUSG00000101969 | -4,48E-01 | -2,401419393 | 2,05E-01 | 6,51E-01 | 8,76E-01 | Gm20125       | 0,73 | No  |
| ENSMUSG00000101970 | 9,68E-02  | 5,741777232  | 2,09E+00 | 1,48E-01 | 4,88E-01 | 1810026B05Rik | 1,07 | No  |
| ENSMUSG00000101972 | -2,64E-01 | -1,574251474 | 2,43E-01 | 6,22E-01 | 8,58E-01 | Hist1h3i      | 0,83 | No  |
| ENSMUSG00000101985 | -1,89E+00 | -3,1076441   | 1,42E+00 | 2,33E-01 | 5,50E-01 | Gm28929       | 0,27 | No  |
| ENSMUSG00000101986 | -1,78E-01 | 1,062693736  | 7,28E-01 | 3,94E-01 | 6,94E-01 | Gm6198        | 0,88 | No  |
| ENSMUSG00000101994 | -2,65E+00 | -3,033633091 | 2,78E+00 | 9,55E-02 | 3,86E-01 | Gm18875       | 0,16 | No  |
| ENSMUSG00000101995 | 3,97E-01  | -1,77070717  | 4,72E-01 | 4,92E-01 | 7,78E-01 | Gm29480       | 1,32 | No  |
| ENSMUSG00000102014 | -1,17E+00 | -3,033639974 | 5,98E-01 | 4,39E-01 | 7,32E-01 | 2900009J06Rik | 0,44 | No  |
| ENSMUSG00000102018 | -1,45E+00 | -1,509965338 | 6,97E+00 | 8,28E-03 | 8,12E-02 | K230010J24Rik | 0,37 | No  |
| ENSMUSG00000102027 | 4,46E-01  | -2,033699267 | 4,09E-01 | 5,22E-01 | 8,01E-01 | Gm28914       | 1,36 | No  |
| ENSMUSG00000102029 | 1,24E+00  | -3,070141551 | 6,90E-01 | 4,06E-01 | 7,02E-01 | Gm29530       | 2,36 | No  |
| ENSMUSG00000102030 | 6,86E-01  | -2,107686619 | 6,83E-01 | 4,09E-01 | 7,05E-01 | Gm29106       | 1,61 | No  |
| ENSMUSG00000102037 | -3,07E-01 | 7,7391722    | 2,73E+01 | 1,71E-07 | 9,08E-06 | Bcl2a1a       | 0,81 | Yes |
| ENSMUSG00000102038 | 1,53E-02  | 4,318729022  | 3,45E-02 | 8,53E-01 | 9,91E-01 | Gm12345       | 1,01 | No  |
| ENSMUSG00000102047 | 1,78E+00  | -2,963287612 | 1,28E+00 | 2,58E-01 | 5,50E-01 | 2010010A06Rik | 3,44 | No  |
| ENSMUSG00000102048 | 4,79E-01  | -2,107565275 | 4,45E-01 | 5,05E-01 | 7,89E-01 | Gm6075        | 1,39 | No  |
| ENSMUSG00000102049 | -8,42E-02 | 5,521080479  | 1,48E+00 | 2,23E-01 | 5,50E-01 | Zbed6         | 0,94 | No  |
| ENSMUSG00000102051 | 1,36E-01  | 0,544903637  | 2,95E-01 | 5,87E-01 | 8,40E-01 | I830127L07Rik | 1,10 | No  |
| ENSMUSG00000102055 | -5,82E-01 | 0,389336988  | 5,96E+00 | 1,47E-02 | 1,24E-01 | Gm28913       | 0,67 | No  |
| ENSMUSG00000102059 | -5,93E-01 | 0,458537331  | 5,36E+00 | 2,06E-02 | 1,54E-01 | Gm20257       | 0,66 | No  |

|                    |           |              |           |          |          |               |      |     |
|--------------------|-----------|--------------|-----------|----------|----------|---------------|------|-----|
| ENSMUSG00000102063 | -1,94E+00 | -3,107619243 | 1,50E+00  | 2,21E-01 | 5,50E-01 | Gm28706       | 0,26 | No  |
| ENSMUSG00000102070 | -1,75E-02 | 11,31221562  | 9,86E-02  | 7,54E-01 | 9,33E-01 | Gm28661       | 0,99 | No  |
| ENSMUSG00000102073 | 1,87E+00  | -3,107639691 | 1,38E+00  | 2,40E-01 | 5,50E-01 | Gm6818        | 3,67 | No  |
| ENSMUSG00000102080 | 3,14E-02  | -3,107617333 | -7,69E-10 | 1,00E+00 | 1,00E+00 | Gm5092        | 1,02 | No  |
| ENSMUSG00000102083 | 2,60E+00  | -2,832034532 | 2,63E+00  | 1,05E-01 | 3,97E-01 | Gm5259        | 6,07 | No  |
| ENSMUSG00000102084 | 1,22E+00  | -3,146114919 | 6,90E-01  | 4,06E-01 | 7,02E-01 | Gm29638       | 2,33 | No  |
| ENSMUSG00000102093 | -1,86E+00 | -2,963227946 | 1,40E+00  | 2,36E-01 | 5,50E-01 | Gm17813       | 0,28 | No  |
| ENSMUSG00000102095 | -4,48E-01 | -2,146136165 | 3,69E-01  | 5,43E-01 | 8,12E-01 | C730036E19Rik | 0,73 | No  |
| ENSMUSG00000102097 | -4,39E-01 | -0,871826866 | 1,07E+00  | 3,00E-01 | 5,96E-01 | A930006L05Rik | 0,74 | No  |
| ENSMUSG00000102099 | -1,35E+00 | -2,655062079 | 1,15E+00  | 2,84E-01 | 5,80E-01 | 1700011B04Rik | 0,39 | No  |
| ENSMUSG00000102101 | 2,06E-01  | 1,627622486  | 1,45E+00  | 2,29E-01 | 5,50E-01 | Zbtb11os1     | 1,15 | No  |
| ENSMUSG00000102106 | -1,94E+00 | -3,107619243 | 1,50E+00  | 2,21E-01 | 5,50E-01 | 2310043O21Rik | 0,26 | No  |
| ENSMUSG00000102112 | -8,77E-01 | -2,070174993 | 1,38E+00  | 2,40E-01 | 5,50E-01 | 1810041H14Rik | 0,54 | No  |
| ENSMUSG00000102114 | -5,67E-01 | -2,71168854  | 2,52E-01  | 6,16E-01 | 8,54E-01 | BC048559      | 0,68 | No  |
| ENSMUSG00000102117 | -2,39E-01 | 5,62859172   | 1,24E+01  | 4,21E-04 | 7,97E-03 | Rpsa-ps1      | 0,85 | Yes |
| ENSMUSG00000102123 | -7,05E-01 | -2,2057965   | 8,47E-01  | 3,58E-01 | 6,59E-01 | Gm4319        | 0,61 | No  |
| ENSMUSG00000102126 | 1,85E+00  | -3,107657832 | 1,35E+00  | 2,46E-01 | 5,50E-01 | Gm29143       | 3,61 | No  |
| ENSMUSG00000102133 | 1,10E+00  | -2,497647012 | 1,15E+00  | 2,84E-01 | 5,80E-01 | Gm37106       | 2,14 | No  |
| ENSMUSG00000102135 | -5,67E-02 | 4,501876334  | 4,97E-01  | 4,81E-01 | 7,68E-01 | Gm37108       | 0,96 | No  |
| ENSMUSG00000102137 | -1,94E+00 | -3,107619243 | 1,50E+00  | 2,21E-01 | 5,50E-01 | Rpl28-ps2     | 0,26 | No  |
| ENSMUSG00000102140 | 5,24E-01  | 0,392331967  | 4,28E+00  | 3,85E-02 | 2,33E-01 | Gm38058       | 1,44 | No  |
| ENSMUSG00000102141 | 1,05E+00  | -2,929321575 | 4,72E-01  | 4,92E-01 | 7,78E-01 | Gm3952        | 2,07 | No  |
| ENSMUSG00000102142 | 1,11E+00  | -2,185711076 | 1,16E+00  | 2,81E-01 | 5,78E-01 | Gm26930       | 2,15 | No  |
| ENSMUSG00000102143 | 5,45E-01  | -1,070229699 | 1,62E+00  | 2,03E-01 | 5,50E-01 | Gm38057       | 1,46 | No  |
| ENSMUSG00000102144 | -1,26E+00 | -0,107133714 | 1,25E+01  | 4,04E-04 | 7,67E-03 | 4930429P21Rik | 0,42 | Yes |
| ENSMUSG00000102145 | 5,91E-02  | 5,096540581  | 6,49E-01  | 4,20E-01 | 7,16E-01 | Gm38056       | 1,04 | No  |
| ENSMUSG00000102147 | -2,33E+00 | -3,070167349 | 2,12E+00  | 1,46E-01 | 4,83E-01 | Gm38055       | 0,20 | No  |
| ENSMUSG00000102148 | 3,14E-02  | -3,107617333 | -7,69E-10 | 1,00E+00 | 1,00E+00 | Gm38059       | 1,02 | No  |
| ENSMUSG00000102151 | -2,59E-01 | 0,508719608  | 9,76E-01  | 3,23E-01 | 6,23E-01 | Gm37472       | 0,84 | No  |
| ENSMUSG00000102152 | 1,36E+00  | -2,54826725  | 1,88E+00  | 1,70E-01 | 5,26E-01 | Gm37475       | 2,56 | No  |
| ENSMUSG00000102153 | -6,43E-02 | -1,83201355  | 1,16E-02  | 9,14E-01 | 1,00E+00 | Gm37474       | 0,96 | No  |
| ENSMUSG00000102154 | -2,70E+00 | -3,033614577 | 2,89E+00  | 8,93E-02 | 3,79E-01 | Gm37469       | 0,15 | No  |

|                    |           |              |           |          |          |               |      |     |
|--------------------|-----------|--------------|-----------|----------|----------|---------------|------|-----|
| ENSMUSG00000102155 | 7,60E-01  | 0,693737689  | 9,79E+00  | 1,76E-03 | 2,52E-02 | Gm37468       | 1,69 | Yes |
| ENSMUSG00000102157 | 3,25E-01  | -1,770642709 | 2,81E-01  | 5,96E-01 | 8,44E-01 | Gm37470       | 1,25 | No  |
| ENSMUSG00000102158 | -2,15E-01 | 0,647004908  | 8,77E-01  | 3,49E-01 | 6,50E-01 | Gm34342       | 0,86 | No  |
| ENSMUSG00000102162 | 3,90E-02  | 0,586740571  | 2,65E-02  | 8,71E-01 | 1,00E+00 | Gm2367        | 1,03 | No  |
| ENSMUSG00000102171 | -6,99E-02 | 0,527090201  | 8,20E-02  | 7,75E-01 | 9,45E-01 | Gm37874       | 0,95 | No  |
| ENSMUSG00000102172 | -5,82E-01 | -2,497609909 | 2,65E-01  | 6,07E-01 | 8,50E-01 | Gm37873       | 0,67 | No  |
| ENSMUSG00000102175 | -8,38E-02 | 1,214065818  | 1,92E-01  | 6,61E-01 | 8,82E-01 | Gm6119        | 0,94 | No  |
| ENSMUSG00000102179 | -8,65E-01 | -2,770598145 | 4,09E-01  | 5,22E-01 | 8,01E-01 | Gm37868       | 0,55 | No  |
| ENSMUSG00000102190 | -4,59E-02 | 0,911086289  | 4,66E-02  | 8,29E-01 | 9,76E-01 | Gm38166       | 0,97 | No  |
| ENSMUSG00000102191 | 3,79E-01  | 3,05587339   | 1,10E+01  | 9,18E-04 | 1,51E-02 | Gm36569       | 1,30 | Yes |
| ENSMUSG00000102193 | -4,40E-01 | 0,521009114  | 3,20E+00  | 7,35E-02 | 3,45E-01 | Gm7299        | 0,74 | No  |
| ENSMUSG00000102196 | -2,72E-01 | -1,574185073 | 2,59E-01  | 6,11E-01 | 8,52E-01 | Gm38171       | 0,83 | No  |
| ENSMUSG00000102201 | -1,94E+00 | -3,107619243 | 1,50E+00  | 2,21E-01 | 5,50E-01 | Gm36956       | 0,26 | No  |
| ENSMUSG00000102202 | 4,95E-01  | -0,107641197 | 2,48E+00  | 1,16E-01 | 4,21E-01 | Gm33280       | 1,41 | No  |
| ENSMUSG00000102204 | 1,37E-01  | -2,10769824  | 3,23E-02  | 8,57E-01 | 9,94E-01 | Gm36958       | 1,10 | No  |
| ENSMUSG00000102206 | 4,82E-03  | -3,17446542  | 1,60E-11  | 1,00E+00 | 1,00E+00 | Pcdha11       | 1,00 | No  |
| ENSMUSG00000102211 | -4,98E-02 | -2,711753409 | 2,21E-03  | 9,63E-01 | 1,00E+00 | Gm37490       | 0,97 | No  |
| ENSMUSG00000102212 | -8,22E-01 | -2,896137491 | 3,70E-01  | 5,43E-01 | 8,12E-01 | C230085N15Rik | 0,57 | No  |
| ENSMUSG00000102218 | 6,47E-02  | -2,355596799 | 5,54E-03  | 9,41E-01 | 1,00E+00 | Gm37493       | 1,05 | No  |
| ENSMUSG00000102222 | -3,00E-01 | -1,973583028 | 1,86E-01  | 6,66E-01 | 8,86E-01 | Pcdhga10      | 0,81 | No  |
| ENSMUSG00000102224 | 1,27E+00  | -2,18558605  | 2,19E+00  | 1,39E-01 | 4,70E-01 | 4930447F24Rik | 2,41 | No  |
| ENSMUSG00000102225 | -6,38E-01 | -1,929348773 | 1,03E+00  | 3,10E-01 | 6,09E-01 | Gm37983       | 0,64 | No  |
| ENSMUSG00000102234 | 2,10E-01  | 3,617319792  | 4,66E+00  | 3,09E-02 | 2,03E-01 | Gm37885       | 1,16 | No  |
| ENSMUSG00000102235 | -3,05E-01 | 0,753449292  | 1,91E+00  | 1,67E-01 | 5,21E-01 | Gm37886       | 0,81 | No  |
| ENSMUSG00000102238 | -1,90E+00 | -3,033647263 | 1,44E+00  | 2,30E-01 | 5,50E-01 | Gm37890       | 0,27 | No  |
| ENSMUSG00000102241 | -2,94E-01 | -1,155811885 | 4,69E-01  | 4,94E-01 | 7,79E-01 | Gm37716       | 0,82 | No  |
| ENSMUSG00000102243 | 3,02E-01  | 0,627229006  | 1,60E+00  | 2,06E-01 | 5,50E-01 | Gm37718       | 1,23 | No  |
| ENSMUSG00000102244 | 2,89E-01  | -2,497668689 | 8,50E-02  | 7,71E-01 | 9,42E-01 | Gm37714       | 1,22 | No  |
| ENSMUSG00000102246 | 7,48E-01  | -1,333172681 | 1,88E+00  | 1,70E-01 | 5,26E-01 | 9430037O13Rik | 1,68 | No  |
| ENSMUSG00000102254 | 1,36E-01  | 0,221862773  | 2,50E-01  | 6,17E-01 | 8,55E-01 | Gm7496        | 1,10 | No  |
| ENSMUSG00000102256 | -3,83E-02 | -3,107651936 | -7,91E-11 | 1,00E+00 | 1,00E+00 | Gm38258       | 0,97 | No  |
| ENSMUSG00000102258 | 8,64E-02  | 0,970669571  | 1,64E-01  | 6,86E-01 | 8,97E-01 | Gm38257       | 1,06 | No  |

|                    |           |              |          |          |          |               |      |     |
|--------------------|-----------|--------------|----------|----------|----------|---------------|------|-----|
| ENSMUSG00000102260 | -2,53E+00 | -2,548167269 | 3,86E+00 | 4,93E-02 | 2,68E-01 | D330025C20Rik | 0,17 | No  |
| ENSMUSG00000102268 | -6,40E-01 | -2,146078482 | 7,96E-01 | 3,72E-01 | 6,73E-01 | Gm8826        | 0,64 | No  |
| ENSMUSG00000102269 | -5,06E-01 | 2,756358153  | 1,89E+01 | 1,39E-05 | 4,48E-04 | Gm7357        | 0,70 | Yes |
| ENSMUSG00000102270 | -2,19E-01 | 4,478737104  | 7,47E+00 | 6,29E-03 | 6,65E-02 | Gm8388        | 0,86 | No  |
| ENSMUSG00000102272 | 2,90E-01  | -1,165901248 | 3,89E-01 | 5,33E-01 | 8,06E-01 | Gm7512        | 1,22 | No  |
| ENSMUSG00000102275 | -5,02E-01 | -1,424794832 | 8,18E-01 | 3,66E-01 | 6,67E-01 | Gm37144       | 0,71 | No  |
| ENSMUSG00000102277 | -5,96E-01 | -2,289418148 | 5,87E-01 | 4,44E-01 | 7,35E-01 | A130050O07Rik | 0,66 | No  |
| ENSMUSG00000102278 | 2,98E-01  | 0,644191943  | 1,46E+00 | 2,26E-01 | 5,50E-01 | Gm37145       | 1,23 | No  |
| ENSMUSG00000102282 | -6,48E-02 | -2,963249916 | 1,90E-03 | 9,65E-01 | 1,00E+00 | A930032L01Rik | 0,96 | No  |
| ENSMUSG00000102286 | 1,87E+00  | -3,107639691 | 1,38E+00 | 2,40E-01 | 5,50E-01 | Gm37004       | 3,67 | No  |
| ENSMUSG00000102291 | 2,62E+00  | -3,033654625 | 2,66E+00 | 1,03E-01 | 3,95E-01 | Gm37542       | 6,16 | No  |
| ENSMUSG00000102293 | 1,82E+00  | -3,033661385 | 1,31E+00 | 2,52E-01 | 5,50E-01 | Gm37541       | 3,54 | No  |
| ENSMUSG00000102298 | 1,85E+00  | -3,107657832 | 1,35E+00 | 2,46E-01 | 5,50E-01 | Gm33707       | 3,61 | No  |
| ENSMUSG00000102299 | 1,81E-01  | 0,316915206  | 4,49E-01 | 5,03E-01 | 7,88E-01 | Gm37539       | 1,13 | No  |
| ENSMUSG00000102300 | -3,99E-02 | -2,770591693 | 9,41E-04 | 9,76E-01 | 1,00E+00 | Gm34106       | 0,97 | No  |
| ENSMUSG00000102302 | -2,58E-01 | 1,42900807   | 2,05E+00 | 1,52E-01 | 4,94E-01 | Gm38190       | 0,84 | No  |
| ENSMUSG00000102305 | 4,20E-01  | -0,580879871 | 1,41E+00 | 2,35E-01 | 5,50E-01 | Gm38192       | 1,34 | No  |
| ENSMUSG00000102307 | 4,28E-01  | -2,71170148  | 1,43E-01 | 7,05E-01 | 9,07E-01 | Gm38194       | 1,35 | No  |
| ENSMUSG00000102312 | 4,82E-03  | -3,17446542  | 1,60E-11 | 1,00E+00 | 1,00E+00 | Pcdha3        | 1,00 | No  |
| ENSMUSG00000102313 | 1,17E+00  | -3,14612376  | 6,40E-01 | 4,24E-01 | 7,18E-01 | Ighv1-62-1    | 2,26 | No  |
| ENSMUSG00000102323 | -5,11E-01 | -0,607517438 | 2,20E+00 | 1,38E-01 | 4,68E-01 | Gm37790       | 0,70 | No  |
| ENSMUSG00000102324 | -7,79E-02 | 0,650201358  | 1,08E-01 | 7,42E-01 | 9,27E-01 | Gm19721       | 0,95 | No  |
| ENSMUSG00000102329 | -5,10E-01 | -0,300366125 | 2,59E+00 | 1,08E-01 | 4,02E-01 | Gm10851       | 0,70 | No  |
| ENSMUSG00000102330 | -6,81E-02 | -2,896149338 | 3,18E-03 | 9,55E-01 | 1,00E+00 | Gm37234       | 0,95 | No  |
| ENSMUSG00000102332 | 9,75E-01  | -2,863761875 | 5,53E-01 | 4,57E-01 | 7,46E-01 | Gm19331       | 1,97 | No  |
| ENSMUSG00000102336 | -1,78E-01 | 3,997081207  | 4,10E+00 | 4,29E-02 | 2,46E-01 | Gm37233       | 0,88 | No  |
| ENSMUSG00000102344 | 1,87E+00  | -3,107639691 | 1,38E+00 | 2,40E-01 | 5,50E-01 | 9430053O09Rik | 3,67 | No  |
| ENSMUSG00000102349 | -4,60E-01 | 5,746557562  | 4,61E+01 | 1,14E-11 | 1,19E-09 | Gm37376       | 0,73 | Yes |
| ENSMUSG00000102352 | -1,05E+00 | -1,472761156 | 3,34E+00 | 6,76E-02 | 3,28E-01 | Gm38346       | 0,48 | No  |
| ENSMUSG00000102353 | 2,43E-01  | 2,223852298  | 2,93E+00 | 8,71E-02 | 3,78E-01 | Gm38345       | 1,18 | No  |
| ENSMUSG00000102359 | 1,87E+00  | -3,107639691 | 1,38E+00 | 2,40E-01 | 5,50E-01 | Gm38351       | 3,67 | No  |
| ENSMUSG00000102363 | -8,02E-01 | -2,89612104  | 3,51E-01 | 5,53E-01 | 8,19E-01 | Gm32999       | 0,57 | No  |

|                    |           |              |           |          |          |               |      |     |
|--------------------|-----------|--------------|-----------|----------|----------|---------------|------|-----|
| ENSMUSG00000102365 | 8,83E-01  | -1,929335819 | 1,72E+00  | 1,90E-01 | 5,50E-01 | Gm37045       | 1,84 | No  |
| ENSMUSG00000102369 | 1,83E+00  | -2,963282593 | 1,33E+00  | 2,50E-01 | 5,50E-01 | 9530022L04Rik | 3,56 | No  |
| ENSMUSG00000102370 | -8,05E-01 | -1,033580077 | 4,00E+00  | 4,56E-02 | 2,55E-01 | Gm37973       | 0,57 | No  |
| ENSMUSG00000102372 | 3,14E-02  | -3,107617333 | -7,69E-10 | 1,00E+00 | 1,00E+00 | A430050A11Rik | 1,02 | No  |
| ENSMUSG00000102374 | -7,93E-03 | -0,863631265 | 3,75E-04  | 9,85E-01 | 1,00E+00 | Gm38387       | 0,99 | No  |
| ENSMUSG00000102376 | -2,12E+00 | -1,472748877 | 1,22E+01  | 4,75E-04 | 8,80E-03 | Gm37975       | 0,23 | Yes |
| ENSMUSG00000102380 | 4,45E-01  | -2,600697781 | 1,54E-01  | 6,94E-01 | 9,02E-01 | Gm38140       | 1,36 | No  |
| ENSMUSG00000102383 | -2,67E+00 | -2,896145101 | 2,83E+00  | 9,25E-02 | 3,83E-01 | Gm38142       | 0,16 | No  |
| ENSMUSG00000102385 | 1,86E+00  | -3,033661846 | 1,35E+00  | 2,46E-01 | 5,50E-01 | Gm38144       | 3,62 | No  |
| ENSMUSG00000102390 | -6,11E-01 | -2,355528667 | 5,09E-01  | 4,75E-01 | 7,63E-01 | Gm37579       | 0,65 | No  |
| ENSMUSG00000102391 | -3,83E-02 | -3,107651936 | -7,91E-11 | 1,00E+00 | 1,00E+00 | Gm37578       | 0,97 | No  |
| ENSMUSG00000102397 | -1,87E+00 | -3,107637761 | 1,39E+00  | 2,38E-01 | 5,50E-01 | Gm37573       | 0,27 | No  |
| ENSMUSG00000102399 | 2,51E-01  | -0,389611201 | 5,38E-01  | 4,63E-01 | 7,52E-01 | Gm5049        | 1,19 | No  |
| ENSMUSG00000102401 | 5,67E-01  | -2,146190703 | 5,44E-01  | 4,61E-01 | 7,49E-01 | Gm37864       | 1,48 | No  |
| ENSMUSG00000102405 | -2,00E-02 | -2,89610696  | 2,29E-04  | 9,88E-01 | 1,00E+00 | Gm37863       | 0,99 | No  |
| ENSMUSG00000102411 | 1,71E-01  | -0,190774041 | 3,50E-01  | 5,54E-01 | 8,20E-01 | Gm36936       | 1,13 | No  |
| ENSMUSG00000102413 | 1,86E+00  | -2,378281019 | 4,09E+00  | 4,31E-02 | 2,47E-01 | Gm36937       | 3,62 | No  |
| ENSMUSG00000102415 | 7,31E-01  | -1,896164632 | 9,54E-01  | 3,29E-01 | 6,29E-01 | A430110C17Rik | 1,66 | No  |
| ENSMUSG00000102416 | 1,25E+00  | -2,574233724 | 1,53E+00  | 2,16E-01 | 5,50E-01 | 4933424G06Rik | 2,37 | No  |
| ENSMUSG00000102418 | 3,57E-01  | 5,666826696  | 2,75E+01  | 1,59E-07 | 8,47E-06 | Sh2d1b1       | 1,28 | Yes |
| ENSMUSG00000102419 | -9,59E-01 | -2,401355378 | 1,11E+00  | 2,92E-01 | 5,87E-01 | Gm36940       | 0,51 | No  |
| ENSMUSG00000102422 | -6,20E-02 | -1,561069023 | 1,35E-02  | 9,08E-01 | 1,00E+00 | Gm21949       | 0,96 | No  |
| ENSMUSG00000102423 | -1,90E+00 | -3,033594154 | 1,44E+00  | 2,30E-01 | 5,50E-01 | Gm37465       | 0,27 | No  |
| ENSMUSG00000102425 | 1,61E-01  | 3,329740334  | 2,37E+00  | 1,23E-01 | 4,39E-01 | Gm26616       | 1,12 | No  |
| ENSMUSG00000102427 | -1,72E+00 | -2,600628371 | 2,06E+00  | 1,51E-01 | 4,93E-01 | Gm37463       | 0,30 | No  |
| ENSMUSG00000102428 | 5,31E-03  | -1,113293985 | 1,42E-04  | 9,90E-01 | 1,00E+00 | Pcdhga12      | 1,00 | No  |
| ENSMUSG00000102433 | -3,57E+00 | -2,863689623 | 5,71E+00  | 1,68E-02 | 1,35E-01 | Gm38050       | 0,08 | No  |
| ENSMUSG00000102436 | -1,90E+00 | -3,033647263 | 1,44E+00  | 2,30E-01 | 5,50E-01 | Gm38047       | 0,27 | No  |
| ENSMUSG00000102437 | -7,60E-02 | -2,770602814 | 3,90E-03  | 9,50E-01 | 1,00E+00 | Gm38048       | 0,95 | No  |
| ENSMUSG00000102439 | -1,89E+00 | -3,1076441   | 1,42E+00  | 2,33E-01 | 5,50E-01 | Flg           | 0,27 | No  |
| ENSMUSG00000102440 | -1,22E-01 | -1,973575199 | 3,08E-02  | 8,61E-01 | 9,96E-01 | Pcdhga9       | 0,92 | No  |
| ENSMUSG00000102442 | 2,63E+00  | -2,963269893 | 2,67E+00  | 1,02E-01 | 3,94E-01 | Gm37103       | 6,19 | No  |

|                    |           |              |           |          |          |               |       |    |
|--------------------|-----------|--------------|-----------|----------|----------|---------------|-------|----|
| ENSMUSG00000102447 | -1,87E+00 | -3,107637761 | 1,39E+00  | 2,38E-01 | 5,50E-01 | Gm6621        | 0,27  | No |
| ENSMUSG00000102448 | -1,67E+00 | -1,896052369 | 5,39E+00  | 2,03E-02 | 1,53E-01 | Gm37101       | 0,31  | No |
| ENSMUSG00000102450 | -1,54E+00 | -2,268027982 | 3,45E+00  | 6,34E-02 | 3,14E-01 | Gm38343       | 0,34  | No |
| ENSMUSG00000102451 | -9,42E-01 | -1,378082833 | 2,49E+00  | 1,15E-01 | 4,19E-01 | Gm37655       | 0,52  | No |
| ENSMUSG00000102452 | 5,29E-02  | -1,800988694 | 8,16E-03  | 9,28E-01 | 1,00E+00 | Gm38344       | 1,04  | No |
| ENSMUSG00000102457 | -1,89E-01 | -1,485214619 | 1,44E-01  | 7,05E-01 | 9,07E-01 | Gm38342       | 0,88  | No |
| ENSMUSG00000102459 | -3,03E+00 | -2,929258201 | 3,74E+00  | 5,32E-02 | 2,82E-01 | Gm38352       | 0,12  | No |
| ENSMUSG00000102461 | -7,14E-02 | -2,655085192 | 4,65E-03  | 9,46E-01 | 1,00E+00 | Gm37166       | 0,95  | No |
| ENSMUSG00000102463 | -5,65E-02 | 4,827046234  | 5,45E-01  | 4,60E-01 | 7,49E-01 | 1700003N22Rik | 0,96  | No |
| ENSMUSG00000102466 | -2,56E-01 | -1,9979531   | 1,30E-01  | 7,19E-01 | 9,15E-01 | Gm38200       | 0,84  | No |
| ENSMUSG00000102467 | -4,43E-01 | -2,600680907 | 2,01E-01  | 6,54E-01 | 8,79E-01 | Gm37167       | 0,74  | No |
| ENSMUSG00000102471 | 3,49E+00  | -2,83208088  | 5,28E+00  | 2,16E-02 | 1,58E-01 | Gm5100        | 11,22 | No |
| ENSMUSG00000102474 | 1,13E+00  | -2,401341594 | 1,22E+00  | 2,70E-01 | 5,66E-01 | 2610012C04Rik | 2,19  | No |
| ENSMUSG00000102475 | -5,41E-01 | -2,711718424 | 2,29E-01  | 6,32E-01 | 8,64E-01 | Gm37246       | 0,69  | No |
| ENSMUSG00000102476 | -5,69E-02 | -3,107650735 | 1,33E-03  | 9,71E-01 | 1,00E+00 | Gm37245       | 0,96  | No |
| ENSMUSG00000102478 | -1,19E-01 | 0,834703704  | 3,10E-01  | 5,78E-01 | 8,35E-01 | BC085271      | 0,92  | No |
| ENSMUSG00000102493 | 1,75E-01  | 2,937636369  | 2,30E+00  | 1,29E-01 | 4,51E-01 | Gm8010        | 1,13  | No |
| ENSMUSG00000102495 | 6,13E-01  | -3,07017178  | 1,51E-01  | 6,98E-01 | 9,04E-01 | Gm26524       | 1,53  | No |
| ENSMUSG00000102496 | -1,96E-01 | -0,801087618 | 2,25E-01  | 6,35E-01 | 8,67E-01 | Gm36989       | 0,87  | No |
| ENSMUSG00000102500 | 1,09E+00  | -2,655149832 | 1,13E+00  | 2,88E-01 | 5,84E-01 | Gm37371       | 2,13  | No |
| ENSMUSG00000102501 | -9,97E-01 | -2,355558953 | 1,21E+00  | 2,72E-01 | 5,69E-01 | Gm37372       | 0,50  | No |
| ENSMUSG00000102503 | -6,51E-01 | -0,246840514 | 3,72E+00  | 5,38E-02 | 2,84E-01 | Gm37370       | 0,64  | No |
| ENSMUSG00000102509 | 1,87E+00  | -3,107639691 | 1,38E+00  | 2,40E-01 | 5,50E-01 | Gm37368       | 3,67  | No |
| ENSMUSG00000102516 | 4,24E-02  | -3,033592245 | -1,17E-09 | 1,00E+00 | 1,00E+00 | Gm38340       | 1,03  | No |
| ENSMUSG00000102521 | -1,87E+00 | -3,107637761 | 1,39E+00  | 2,38E-01 | 5,50E-01 | Gm37781       | 0,27  | No |
| ENSMUSG00000102523 | -9,56E-01 | -2,711720263 | 8,02E-01  | 3,71E-01 | 6,72E-01 | Gm37783       | 0,52  | No |
| ENSMUSG00000102525 | 1,01E-01  | 2,628571963  | 6,50E-01  | 4,20E-01 | 7,15E-01 | Gm37784       | 1,07  | No |
| ENSMUSG00000102526 | -5,91E-01 | -2,401327244 | 4,75E-01  | 4,91E-01 | 7,77E-01 | Gm37785       | 0,66  | No |
| ENSMUSG00000102533 | 2,80E-01  | -0,333284492 | 7,37E-01  | 3,91E-01 | 6,91E-01 | Gm37226       | 1,21  | No |
| ENSMUSG00000102535 | -9,31E-01 | -2,60064558  | 7,59E-01  | 3,84E-01 | 6,85E-01 | lghv1-41      | 0,52  | No |
| ENSMUSG00000102540 | -1,51E+00 | -2,185541865 | 3,31E+00  | 6,90E-02 | 3,31E-01 | Gm38134       | 0,35  | No |
| ENSMUSG00000102542 | 7,54E-01  | -2,83200271  | 3,09E-01  | 5,78E-01 | 8,36E-01 | Gm38133       | 1,69  | No |

|                    |           |              |          |          |          |               |      |     |
|--------------------|-----------|--------------|----------|----------|----------|---------------|------|-----|
| ENSMUSG00000102543 | 3,26E-01  | -0,183635043 | 9,60E-01 | 3,27E-01 | 6,28E-01 | Pcdhgc5       | 1,25 | No  |
| ENSMUSG00000102545 | -2,60E-01 | -0,946229569 | 3,86E-01 | 5,34E-01 | 8,07E-01 | 6430573P05Rik | 0,84 | No  |
| ENSMUSG00000102546 | -2,10E-01 | -1,088963246 | 2,27E-01 | 6,33E-01 | 8,65E-01 | Gm9722        | 0,86 | No  |
| ENSMUSG00000102548 | 5,68E-01  | -1,669167678 | 8,80E-01 | 3,48E-01 | 6,49E-01 | Gm16701       | 1,48 | No  |
| ENSMUSG00000102550 | -1,60E-01 | 7,054983052  | 6,98E+00 | 8,23E-03 | 8,08E-02 | Gm8276        | 0,90 | No  |
| ENSMUSG00000102553 | -4,59E-02 | -2,655112421 | 1,47E-03 | 9,69E-01 | 1,00E+00 | D930036K23Rik | 0,97 | No  |
| ENSMUSG00000102554 | 3,58E-01  | -1,401463145 | 5,19E-01 | 4,71E-01 | 7,59E-01 | Gm37568       | 1,28 | No  |
| ENSMUSG00000102555 | 1,99E-01  | -0,600997564 | 3,01E-01 | 5,83E-01 | 8,38E-01 | 6430511E19Rik | 1,15 | No  |
| ENSMUSG00000102556 | -8,48E-01 | -1,175663452 | 2,40E+00 | 1,21E-01 | 4,35E-01 | Gm37569       | 0,56 | No  |
| ENSMUSG00000102558 | -4,62E-02 | -1,929380247 | 6,37E-03 | 9,36E-01 | 1,00E+00 | Gm37571       | 0,97 | No  |
| ENSMUSG00000102559 | -3,85E-01 | -0,316501349 | 1,24E+00 | 2,65E-01 | 5,61E-01 | Gm37570       | 0,77 | No  |
| ENSMUSG00000102561 | -1,87E+00 | -1,332930759 | 1,34E+01 | 2,51E-04 | 5,26E-03 | Gm37039       | 0,27 | Yes |
| ENSMUSG00000102562 | -1,89E+00 | -3,1076441   | 1,42E+00 | 2,33E-01 | 5,50E-01 | Gm37694       | 0,27 | No  |
| ENSMUSG00000102564 | 4,04E-01  | 2,427655663  | 9,04E+00 | 2,65E-03 | 3,48E-02 | Gm37035       | 1,32 | Yes |
| ENSMUSG00000102565 | -4,19E-01 | -2,655159854 | 1,78E-01 | 6,73E-01 | 8,90E-01 | Gm37036       | 0,75 | No  |
| ENSMUSG00000102570 | -1,89E-03 | 0,694641427  | 6,46E-05 | 9,94E-01 | 1,00E+00 | Gm37968       | 1,00 | No  |
| ENSMUSG00000102571 | -1,92E+00 | -3,0336536   | 1,46E+00 | 2,27E-01 | 5,50E-01 | Gm37967       | 0,26 | No  |
| ENSMUSG00000102573 | -4,51E-01 | -2,711719841 | 2,08E-01 | 6,48E-01 | 8,75E-01 | Gm7265        | 0,73 | No  |
| ENSMUSG00000102577 | -7,28E-01 | -2,963247349 | 2,12E-01 | 6,46E-01 | 8,73E-01 | Gm37969       | 0,60 | No  |
| ENSMUSG00000102591 | -7,94E-01 | -2,896102912 | 3,44E-01 | 5,57E-01 | 8,21E-01 | Gm38383       | 0,58 | No  |
| ENSMUSG00000102593 | -1,17E-01 | -0,548255815 | 1,13E-01 | 7,37E-01 | 9,25E-01 | Gm38384       | 0,92 | No  |
| ENSMUSG00000102595 | -1,87E+00 | -3,107637761 | 1,39E+00 | 2,38E-01 | 5,50E-01 | Gm30097       | 0,27 | No  |
| ENSMUSG00000102599 | -1,47E+00 | -2,5482008   | 2,24E+00 | 1,34E-01 | 4,61E-01 | Gm38386       | 0,36 | No  |
| ENSMUSG00000102600 | -2,66E+00 | -2,9632547   | 2,82E+00 | 9,28E-02 | 3,83E-01 | Gm37266       | 0,16 | No  |
| ENSMUSG00000102602 | -1,32E-03 | 4,950765185  | 3,11E-04 | 9,86E-01 | 1,00E+00 | A930004J17Rik | 1,00 | No  |
| ENSMUSG00000102605 | -2,20E-02 | -3,107641896 | 1,16E-04 | 9,91E-01 | 1,00E+00 | Gm37264       | 0,98 | No  |
| ENSMUSG00000102606 | 3,56E-01  | -1,614108134 | 3,74E-01 | 5,41E-01 | 8,11E-01 | Rpl21-ps1     | 1,28 | No  |
| ENSMUSG00000102607 | -4,88E-01 | -2,033530223 | 3,82E-01 | 5,37E-01 | 8,09E-01 | Gm37265       | 0,71 | No  |
| ENSMUSG00000102608 | -6,95E-02 | 0,426171382  | 8,01E-02 | 7,77E-01 | 9,46E-01 | Gm37267       | 0,95 | No  |
| ENSMUSG00000102609 | -8,98E-02 | 3,244981586  | 7,28E-01 | 3,93E-01 | 6,94E-01 | Gm18432       | 0,94 | No  |
| ENSMUSG00000102611 | 5,74E-01  | -0,828167128 | 1,94E+00 | 1,64E-01 | 5,15E-01 | Gm37847       | 1,49 | No  |
| ENSMUSG00000102615 | -6,17E-03 | -0,485176492 | 2,90E-04 | 9,86E-01 | 1,00E+00 | Gm37844       | 1,00 | No  |



|                    |           |              |           |          |          |               |       |     |
|--------------------|-----------|--------------|-----------|----------|----------|---------------|-------|-----|
| ENSMUSG00000102617 | -4,74E-02 | -2,832029451 | 1,49E-03  | 9,69E-01 | 1,00E+00 | Gm37842       | 0,97  | No  |
| ENSMUSG00000102619 | -1,90E+00 | -3,033594154 | 1,44E+00  | 2,30E-01 | 5,50E-01 | Gm37849       | 0,27  | No  |
| ENSMUSG00000102621 | 4,24E-02  | -3,033592245 | -1,17E-09 | 1,00E+00 | 1,00E+00 | Gm37674       | 1,03  | No  |
| ENSMUSG00000102625 | -1,36E+00 | -2,896086315 | 1,16E+00  | 2,81E-01 | 5,78E-01 | Gm37672       | 0,39  | No  |
| ENSMUSG00000102626 | 6,11E-01  | -2,355574337 | 4,17E-01  | 5,19E-01 | 7,98E-01 | Gm18553       | 1,53  | No  |
| ENSMUSG00000102628 | 1,85E+00  | -3,107657832 | 1,35E+00  | 2,46E-01 | 5,50E-01 | Gm37671       | 3,61  | No  |
| ENSMUSG00000102630 | 4,06E-01  | -0,011473086 | 1,79E+00  | 1,81E-01 | 5,42E-01 | Gm37289       | 1,33  | No  |
| ENSMUSG00000102632 | 1,04E+00  | -2,226311833 | 1,77E+00  | 1,84E-01 | 5,47E-01 | Gm37786       | 2,06  | No  |
| ENSMUSG00000102633 | 9,01E-03  | -3,107646452 | -5,16E-10 | 1,00E+00 | 1,00E+00 | Gm38224       | 1,01  | No  |
| ENSMUSG00000102635 | -4,05E-02 | 0,120018111  | 2,27E-02  | 8,80E-01 | 1,00E+00 | Gm36638       | 0,97  | No  |
| ENSMUSG00000102639 | -1,75E+00 | -2,71163112  | 2,13E+00  | 1,44E-01 | 4,80E-01 | Gm38223       | 0,30  | No  |
| ENSMUSG00000102642 | -9,48E-01 | -1,574118623 | 2,81E+00  | 9,35E-02 | 3,83E-01 | A130048G24Rik | 0,52  | No  |
| ENSMUSG00000102644 | -1,28E-01 | 4,622541635  | 2,68E+00  | 1,01E-01 | 3,94E-01 | Thap6         | 0,92  | No  |
| ENSMUSG00000102649 | -7,28E-01 | -2,311139808 | 5,94E-01  | 4,41E-01 | 7,33E-01 | Gm38021       | 0,60  | No  |
| ENSMUSG00000102651 | 3,46E+00  | -2,896200236 | 5,18E+00  | 2,28E-02 | 1,65E-01 | Gm37080       | 11,01 | No  |
| ENSMUSG00000102652 | -1,35E+00 | -2,655140323 | 1,14E+00  | 2,86E-01 | 5,82E-01 | Gm37078       | 0,39  | No  |
| ENSMUSG00000102662 | -1,76E+00 | -1,033302248 | 1,28E+01  | 3,56E-04 | 6,95E-03 | Gm38377       | 0,29  | Yes |
| ENSMUSG00000102664 | 4,45E-02  | -1,683283352 | 5,77E-03  | 9,39E-01 | 1,00E+00 | Gm38380       | 1,03  | No  |
| ENSMUSG00000102665 | -1,33E+00 | -2,896104821 | 1,11E+00  | 2,92E-01 | 5,88E-01 | Gm38379       | 0,40  | No  |
| ENSMUSG00000102670 | 2,72E-02  | -1,333116613 | 3,02E-03  | 9,56E-01 | 1,00E+00 | Gm37436       | 1,02  | No  |
| ENSMUSG00000102672 | 4,17E-01  | 0,070581101  | 2,26E+00  | 1,33E-01 | 4,59E-01 | Gm37105       | 1,34  | No  |
| ENSMUSG00000102673 | -3,83E-02 | -3,107651936 | -7,91E-11 | 1,00E+00 | 1,00E+00 | Gm37437       | 0,97  | No  |
| ENSMUSG00000102676 | 2,45E+00  | -2,683128114 | 3,56E+00  | 5,92E-02 | 3,01E-01 | Gm37435       | 5,46  | No  |
| ENSMUSG00000102677 | 1,87E+00  | -3,107639691 | 1,38E+00  | 2,40E-01 | 5,50E-01 | 4930535E02Rik | 3,67  | No  |
| ENSMUSG00000102681 | -3,83E-02 | -3,107651936 | -7,91E-11 | 1,00E+00 | 1,00E+00 | Gm37221       | 0,97  | No  |
| ENSMUSG00000102682 | -7,72E-01 | -1,800906094 | 1,76E+00  | 1,84E-01 | 5,48E-01 | Gm37223       | 0,59  | No  |
| ENSMUSG00000102683 | 1,22E+00  | -2,770671198 | 9,27E-01  | 3,36E-01 | 6,37E-01 | Gm37375       | 2,33  | No  |
| ENSMUSG00000102689 | 9,01E-03  | -3,107646452 | -5,16E-10 | 1,00E+00 | 1,00E+00 | Gm37217       | 1,01  | No  |
| ENSMUSG00000102691 | -6,95E-02 | 0,965904471  | 1,09E-01  | 7,42E-01 | 9,27E-01 | Gm37780       | 0,95  | No  |
| ENSMUSG00000102692 | -1,89E+00 | -3,1076441   | 1,42E+00  | 2,33E-01 | 5,50E-01 | Dchs2         | 0,27  | No  |
| ENSMUSG00000102697 | -1,87E+00 | -3,097044956 | 1,39E+00  | 2,38E-01 | 5,50E-01 | Pcdhac2       | 0,27  | No  |
| ENSMUSG00000102700 | -3,15E+00 | -2,963239677 | 4,17E+00  | 4,13E-02 | 2,41E-01 | Gm38312       | 0,11  | No  |

|                    |           |              |           |          |          |               |  |      |    |
|--------------------|-----------|--------------|-----------|----------|----------|---------------|--|------|----|
| ENSMUSG00000102704 | 2,28E-01  | -0,879823501 | 2,96E-01  | 5,87E-01 | 8,40E-01 | Gm38309       |  | 1,17 | No |
| ENSMUSG00000102705 | -7,66E-02 | -1,800987661 | 1,50E-02  | 9,02E-01 | 1,00E+00 | 4632432E15Rik |  | 0,95 | No |
| ENSMUSG00000102706 | 1,85E+00  | -3,107657832 | 1,35E+00  | 2,46E-01 | 5,50E-01 | Gm7417        |  | 3,61 | No |
| ENSMUSG00000102709 | -2,04E+00 | -2,770571276 | 3,16E+00  | 7,54E-02 | 3,49E-01 | Gm38308       |  | 0,24 | No |
| ENSMUSG00000102710 | 1,62E-02  | -0,268143591 | 2,70E-03  | 9,59E-01 | 1,00E+00 | Gm4857        |  | 1,01 | No |
| ENSMUSG00000102712 | -5,87E-01 | -1,770601929 | 9,53E-01  | 3,29E-01 | 6,30E-01 | Gm37758       |  | 0,67 | No |
| ENSMUSG00000102713 | 2,24E-01  | -0,284146071 | 4,20E-01  | 5,17E-01 | 7,98E-01 | Gm29994       |  | 1,17 | No |
| ENSMUSG00000102714 | -9,57E-01 | -2,655153589 | 8,04E-01  | 3,70E-01 | 6,71E-01 | Gm37618       |  | 0,51 | No |
| ENSMUSG00000102715 | 2,00E-01  | 3,133690164  | 3,33E+00  | 6,80E-02 | 3,28E-01 | Gm6209        |  | 1,15 | No |
| ENSMUSG00000102716 | 1,85E+00  | -3,107657832 | 1,35E+00  | 2,46E-01 | 5,50E-01 | Gm5099        |  | 3,61 | No |
| ENSMUSG00000102717 | -1,37E+00 | -2,165747998 | 3,28E+00  | 7,03E-02 | 3,35E-01 | Gm37759       |  | 0,39 | No |
| ENSMUSG00000102719 | 2,62E-01  | 1,181151641  | 1,90E+00  | 1,68E-01 | 5,23E-01 | Gm37760       |  | 1,20 | No |
| ENSMUSG00000102721 | -1,01E+00 | -1,740829661 | 2,62E+00  | 1,06E-01 | 3,98E-01 | A630081D01Rik |  | 0,50 | No |
| ENSMUSG00000102722 | 1,79E+00  | -3,033666867 | 1,28E+00  | 2,58E-01 | 5,50E-01 | Gm37935       |  | 3,46 | No |
| ENSMUSG00000102725 | 2,10E-01  | 2,138753756  | 2,04E+00  | 1,54E-01 | 4,97E-01 | Gm37939       |  | 1,16 | No |
| ENSMUSG00000102731 | -1,89E+00 | -3,033648118 | 1,42E+00  | 2,33E-01 | 5,50E-01 | Gm38261       |  | 0,27 | No |
| ENSMUSG00000102732 | 4,43E-01  | -2,655175498 | 1,53E-01  | 6,95E-01 | 9,02E-01 | Gm37342       |  | 1,36 | No |
| ENSMUSG00000102733 | 7,31E-01  | -2,963267542 | 2,91E-01  | 5,90E-01 | 8,41E-01 | Gm38262       |  | 1,66 | No |
| ENSMUSG00000102737 | 4,54E-01  | -1,136473986 | 9,20E-01  | 3,38E-01 | 6,38E-01 | 1700016A09Rik |  | 1,37 | No |
| ENSMUSG00000102740 | 6,49E-01  | -1,185723925 | 1,62E+00  | 2,02E-01 | 5,50E-01 | Gm37599       |  | 1,57 | No |
| ENSMUSG00000102741 | 9,01E-03  | -3,107646452 | -5,16E-10 | 1,00E+00 | 1,00E+00 | Gm2979        |  | 1,01 | No |
| ENSMUSG00000102742 | -5,88E-01 | -1,873359005 | 7,84E-01  | 3,76E-01 | 6,77E-01 | Pcdhga11      |  | 0,67 | No |
| ENSMUSG00000102744 | 4,24E-02  | -3,033592245 | -1,17E-09 | 1,00E+00 | 1,00E+00 | 5830444F18Rik |  | 1,03 | No |
| ENSMUSG00000102745 | 9,01E-03  | -3,107646452 | -5,16E-10 | 1,00E+00 | 1,00E+00 | Gm37600       |  | 1,01 | No |
| ENSMUSG00000102748 | 8,14E-02  | -1,408263575 | 2,61E-02  | 8,72E-01 | 1,00E+00 | Pcdhgb2       |  | 1,06 | No |
| ENSMUSG00000102749 | -3,12E-01 | -2,22627857  | 1,46E-01  | 7,02E-01 | 9,05E-01 | Gm37598       |  | 0,81 | No |
| ENSMUSG00000102750 | -2,29E+00 | -2,497538915 | 4,28E+00  | 3,87E-02 | 2,33E-01 | Gm37058       |  | 0,20 | No |
| ENSMUSG00000102752 | 1,99E-02  | 3,302293343  | 3,72E-02  | 8,47E-01 | 9,87E-01 | Gm7694        |  | 1,01 | No |
| ENSMUSG00000102755 | -8,74E-01 | -2,874657038 | 4,60E-01  | 4,97E-01 | 7,83E-01 | Gm37055       |  | 0,55 | No |
| ENSMUSG00000102756 | -3,83E-02 | -3,107651936 | -7,91E-11 | 1,00E+00 | 1,00E+00 | Gm37054       |  | 0,97 | No |
| ENSMUSG00000102757 | 7,77E-01  | -0,785900112 | 4,50E+00  | 3,39E-02 | 2,17E-01 | Gm2756        |  | 1,71 | No |
| ENSMUSG00000102759 | 1,35E+00  | -2,548297515 | 1,86E+00  | 1,73E-01 | 5,30E-01 | Gm10463       |  | 2,55 | No |

|                    |           |              |          |          |          |               |      |     |
|--------------------|-----------|--------------|----------|----------|----------|---------------|------|-----|
| ENSMUSG00000102760 | -4,32E+00 | -2,311082983 | 9,99E+00 | 1,57E-03 | 2,32E-02 | Gm37258       | 0,05 | Yes |
| ENSMUSG00000102762 | -1,54E+00 | -1,226305273 | 8,10E+00 | 4,44E-03 | 5,10E-02 | 4930403P22Rik | 0,34 | No  |
| ENSMUSG00000102764 | -2,59E-01 | -1,912599825 | 1,25E-01 | 7,24E-01 | 9,17E-01 | Gm37183       | 0,84 | No  |
| ENSMUSG00000102770 | -1,92E+00 | -2,963214917 | 1,46E+00 | 2,27E-01 | 5,50E-01 | Gm38163       | 0,26 | No  |
| ENSMUSG00000102775 | 2,16E-01  | 0,334520519  | 6,84E-01 | 4,08E-01 | 7,05E-01 | Gm38160       | 1,16 | No  |
| ENSMUSG00000102776 | -1,00E-01 | -0,103022388 | 1,08E-01 | 7,42E-01 | 9,27E-01 | Gm38162       | 0,93 | No  |
| ENSMUSG00000102777 | -6,66E-02 | -2,22630102  | 7,17E-03 | 9,33E-01 | 1,00E+00 | Gm38161       | 0,95 | No  |
| ENSMUSG00000102779 | -1,72E+00 | -2,711703032 | 2,06E+00 | 1,52E-01 | 4,94E-01 | Gm38164       | 0,30 | No  |
| ENSMUSG00000102780 | 6,09E-03  | 3,031418726  | 3,01E-03 | 9,56E-01 | 1,00E+00 | Gm38253       | 1,00 | No  |
| ENSMUSG00000102782 | 1,09E+00  | -2,448693619 | 1,13E+00 | 2,87E-01 | 5,83E-01 | Gm37625       | 2,13 | No  |
| ENSMUSG00000102794 | -6,91E-01 | 0,496334821  | 8,94E+00 | 2,79E-03 | 3,62E-02 | Gm37712       | 0,62 | Yes |
| ENSMUSG00000102796 | -1,12E+00 | -1,088711855 | 6,21E+00 | 1,27E-02 | 1,11E-01 | Gm37711       | 0,46 | No  |
| ENSMUSG00000102797 | 1,44E+00  | -2,636947438 | 1,21E+00 | 2,71E-01 | 5,68E-01 | Gm37710       | 2,71 | No  |
| ENSMUSG00000102798 | -2,61E-01 | -0,923800797 | 3,96E-01 | 5,29E-01 | 8,05E-01 | Gm37271       | 0,83 | No  |
| ENSMUSG00000102801 | -5,12E-01 | -1,574191902 | 1,00E+00 | 3,17E-01 | 6,17E-01 | Gm37478       | 0,70 | No  |
| ENSMUSG00000102802 | -7,81E-01 | -1,205852207 | 2,91E+00 | 8,81E-02 | 3,79E-01 | Mgam2-ps      | 0,58 | No  |
| ENSMUSG00000102805 | 1,46E-01  | 4,375449373  | 3,12E+00 | 7,71E-02 | 3,54E-01 | Gm37240       | 1,11 | No  |
| ENSMUSG00000102808 | 7,50E-01  | -2,600631104 | 3,05E-01 | 5,81E-01 | 8,37E-01 | 5430420F09Rik | 1,68 | No  |
| ENSMUSG00000102809 | 3,17E+00  | -2,963263597 | 4,11E+00 | 4,28E-02 | 2,46E-01 | Gm8643        | 8,99 | No  |
| ENSMUSG00000102813 | -5,90E-01 | 2,833754127  | 2,61E+01 | 3,27E-07 | 1,62E-05 | Gm37795       | 0,66 | Yes |
| ENSMUSG00000102817 | -7,30E-03 | -0,697142663 | 3,06E-04 | 9,86E-01 | 1,00E+00 | Gm6185        | 0,99 | No  |
| ENSMUSG00000102822 | 2,67E+00  | -2,963223118 | 2,76E+00 | 9,68E-02 | 3,88E-01 | 1700113B19Rik | 6,39 | No  |
| ENSMUSG00000102824 | -6,57E-02 | 4,677736412  | 7,10E-01 | 3,99E-01 | 6,98E-01 | Pdcd5-ps      | 0,96 | No  |
| ENSMUSG00000102825 | 1,85E+00  | -3,107657832 | 1,35E+00 | 2,46E-01 | 5,50E-01 | Gm36990       | 3,61 | No  |
| ENSMUSG00000102827 | -1,10E-01 | 3,314229621  | 1,10E+00 | 2,94E-01 | 5,89E-01 | Gm8242        | 0,93 | No  |
| ENSMUSG00000102828 | -9,81E-04 | -2,108402549 | 1,61E-06 | 9,99E-01 | 1,00E+00 | Gm38182       | 1,00 | No  |
| ENSMUSG00000102830 | -5,45E-01 | -2,107602668 | 4,76E-01 | 4,90E-01 | 7,77E-01 | Gm37012       | 0,69 | No  |
| ENSMUSG00000102831 | -1,75E-02 | -2,963227524 | 1,42E-04 | 9,90E-01 | 1,00E+00 | Gm37382       | 0,99 | No  |
| ENSMUSG00000102832 | -1,11E+00 | -2,740840973 | 7,30E-01 | 3,93E-01 | 6,93E-01 | Gm5190        | 0,46 | No  |
| ENSMUSG00000102833 | 9,07E-02  | -1,333274566 | 3,46E-02 | 8,53E-01 | 9,91E-01 | Gm9694        | 1,06 | No  |
| ENSMUSG00000102836 | 1,04E-01  | -3,097053687 | 3,98E-03 | 9,50E-01 | 1,00E+00 | Gm37013       | 1,07 | No  |
| ENSMUSG00000102837 | -3,79E-01 | -1,683103104 | 4,85E-01 | 4,86E-01 | 7,73E-01 | Gm37383       | 0,77 | No  |

|                    |           |              |           |          |          |               |      |     |
|--------------------|-----------|--------------|-----------|----------|----------|---------------|------|-----|
| ENSMUSG00000102839 | -1,35E+00 | -2,77056465  | 1,15E+00  | 2,84E-01 | 5,80E-01 | Gm37385       | 0,39 | No  |
| ENSMUSG00000102840 | 1,07E-01  | 0,461259891  | 1,91E-01  | 6,62E-01 | 8,83E-01 | Gm38037       | 1,08 | No  |
| ENSMUSG00000102841 | 1,87E+00  | -3,107639691 | 1,38E+00  | 2,40E-01 | 5,50E-01 | Gm38036       | 3,67 | No  |
| ENSMUSG00000102844 | -3,17E+00 | -2,896119986 | 4,24E+00  | 3,95E-02 | 2,36E-01 | Gm38034       | 0,11 | No  |
| ENSMUSG00000102845 | 5,97E-01  | -0,748254549 | 2,18E+00  | 1,39E-01 | 4,71E-01 | Gm38033       | 1,51 | No  |
| ENSMUSG00000102850 | 4,55E-01  | -1,683092127 | 5,71E-01  | 4,50E-01 | 7,40E-01 | Gm37082       | 1,37 | No  |
| ENSMUSG00000102852 | -6,64E-01 | -1,333120014 | 1,77E+00  | 1,84E-01 | 5,47E-01 | Gm37083       | 0,63 | No  |
| ENSMUSG00000102854 | -5,80E-01 | -2,711741668 | 2,63E-01  | 6,08E-01 | 8,51E-01 | C130023A14Rik | 0,67 | No  |
| ENSMUSG00000102856 | -1,12E-01 | 1,548691479  | 4,21E-01  | 5,17E-01 | 7,97E-01 | Gm37084       | 0,93 | No  |
| ENSMUSG00000102860 | -2,66E+00 | -3,033639428 | 2,81E+00  | 9,35E-02 | 3,83E-01 | Gm37638       | 0,16 | No  |
| ENSMUSG00000102861 | 1,25E-01  | 1,248335952  | 4,28E-01  | 5,13E-01 | 7,95E-01 | Gm37637       | 1,09 | No  |
| ENSMUSG00000102862 | -7,59E-01 | -1,311147617 | 2,37E+00  | 1,24E-01 | 4,40E-01 | Gm37640       | 0,59 | No  |
| ENSMUSG00000102863 | -3,02E-02 | -0,473083631 | 6,46E-03  | 9,36E-01 | 1,00E+00 | Gm37639       | 0,98 | No  |
| ENSMUSG00000102864 | -4,39E-01 | -1,5482305   | 6,37E-01  | 4,25E-01 | 7,19E-01 | Gm37634       | 0,74 | No  |
| ENSMUSG00000102865 | 3,14E-02  | -3,107617333 | -7,69E-10 | 1,00E+00 | 1,00E+00 | Gm9839        | 1,02 | No  |
| ENSMUSG00000102869 | 2,50E-02  | 7,597669181  | 1,79E-01  | 6,72E-01 | 8,89E-01 | 2900097C17Rik | 1,02 | No  |
| ENSMUSG00000102870 | -6,79E-01 | -1,711677403 | 1,05E+00  | 3,05E-01 | 6,02E-01 | Gm17868       | 0,62 | No  |
| ENSMUSG00000102874 | 3,14E-02  | -3,107617333 | -7,69E-10 | 1,00E+00 | 1,00E+00 | Gm37137       | 1,02 | No  |
| ENSMUSG00000102875 | -6,84E-02 | -1,2160073   | 1,86E-02  | 8,92E-01 | 1,00E+00 | Gm37139       | 0,95 | No  |
| ENSMUSG00000102881 | 2,31E-01  | -1,832058126 | 1,24E-01  | 7,25E-01 | 9,18E-01 | Gm3807        | 1,17 | No  |
| ENSMUSG00000102882 | -1,16E+00 | 0,104208052  | 1,75E+01  | 2,90E-05 | 8,50E-04 | Gm2065        | 0,45 | Yes |
| ENSMUSG00000102887 | 2,40E-01  | 0,225721051  | 7,09E-01  | 4,00E-01 | 6,99E-01 | Gm10857       | 1,18 | No  |
| ENSMUSG00000102889 | 9,01E-03  | -3,107646452 | -5,16E-10 | 1,00E+00 | 1,00E+00 | Gm37282       | 1,01 | No  |
| ENSMUSG00000102891 | -2,02E-01 | 0,966616005  | 9,21E-01  | 3,37E-01 | 6,38E-01 | Gm19114       | 0,87 | No  |
| ENSMUSG00000102894 | 7,41E-01  | -2,963225026 | 3,00E-01  | 5,84E-01 | 8,38E-01 | Gm37851       | 1,67 | No  |
| ENSMUSG00000102895 | 8,38E-02  | 1,613428643  | 2,48E-01  | 6,19E-01 | 8,56E-01 | 5830415G21Rik | 1,06 | No  |
| ENSMUSG00000102896 | 1,82E+00  | -3,033667329 | 1,31E+00  | 2,52E-01 | 5,50E-01 | Gm37852       | 3,54 | No  |
| ENSMUSG00000102899 | 2,22E-01  | -0,896194536 | 2,41E-01  | 6,23E-01 | 8,58E-01 | Gm37850       | 1,17 | No  |
| ENSMUSG00000102900 | -7,84E-01 | -2,472881627 | 5,10E-01  | 4,75E-01 | 7,63E-01 | Gm37811       | 0,58 | No  |
| ENSMUSG00000102904 | -1,94E+00 | -3,107619243 | 1,50E+00  | 2,21E-01 | 5,50E-01 | Gm38265       | 0,26 | No  |
| ENSMUSG00000102909 | 1,86E-01  | 0,320321145  | 5,09E-01  | 4,75E-01 | 7,63E-01 | Gm2453        | 1,14 | No  |
| ENSMUSG00000102912 | -7,13E-02 | 2,126481501  | 2,40E-01  | 6,24E-01 | 8,59E-01 | Gm20731       | 0,95 | No  |

|                    |           |              |           |          |          |               |      |     |
|--------------------|-----------|--------------|-----------|----------|----------|---------------|------|-----|
| ENSMUSG00000102914 | -1,47E-01 | 2,360829299  | 1,22E+00  | 2,69E-01 | 5,65E-01 | Gm35106       | 0,90 | No  |
| ENSMUSG00000102915 | -1,38E-02 | 1,871251215  | 7,51E-03  | 9,31E-01 | 1,00E+00 | Gm32460       | 0,99 | No  |
| ENSMUSG00000102917 | 1,37E+00  | -1,770713992 | 4,85E+00  | 2,77E-02 | 1,87E-01 | Gm37724       | 2,58 | No  |
| ENSMUSG00000102918 | -6,56E-03 | 0,177382143  | 5,25E-04  | 9,82E-01 | 1,00E+00 | Pcdhgc3       | 1,00 | No  |
| ENSMUSG00000102919 | 2,04E-01  | 0,379041883  | 6,88E-01  | 4,07E-01 | 7,03E-01 | Gm37726       | 1,15 | No  |
| ENSMUSG00000102920 | 2,62E+00  | -3,033654625 | 2,66E+00  | 1,03E-01 | 3,95E-01 | Olfr416-ps1   | 6,16 | No  |
| ENSMUSG00000102921 | 4,27E-01  | -2,740891545 | 1,42E-01  | 7,06E-01 | 9,08E-01 | Gm37153       | 1,34 | No  |
| ENSMUSG00000102923 | -7,06E-02 | -1,963225169 | 9,25E-03  | 9,23E-01 | 1,00E+00 | Gm31728       | 0,95 | No  |
| ENSMUSG00000102927 | 6,38E-01  | -1,929372    | 8,27E-01  | 3,63E-01 | 6,64E-01 | Gm37152       | 1,56 | No  |
| ENSMUSG00000102929 | 1,02E+00  | 0,258783819  | 1,38E+01  | 2,02E-04 | 4,39E-03 | Gm37154       | 2,03 | Yes |
| ENSMUSG00000102930 | -2,34E+00 | -1,711572177 | 1,03E+01  | 1,36E-03 | 2,06E-02 | Gm38115       | 0,20 | Yes |
| ENSMUSG00000102935 | 2,56E-01  | -1,770555439 | 1,52E-01  | 6,97E-01 | 9,03E-01 | Gm38355       | 1,19 | No  |
| ENSMUSG00000102939 | -1,89E+00 | -3,033648118 | 1,42E+00  | 2,33E-01 | 5,50E-01 | Gm38111       | 0,27 | No  |
| ENSMUSG00000102940 | -8,31E-01 | -2,896149677 | 3,79E-01  | 5,38E-01 | 8,09E-01 | Gm37551       | 0,56 | No  |
| ENSMUSG00000102950 | -1,52E+00 | -1,497634069 | 6,04E+00  | 1,40E-02 | 1,20E-01 | Gm37018       | 0,35 | No  |
| ENSMUSG00000102951 | -1,36E+00 | -2,896135617 | 1,16E+00  | 2,82E-01 | 5,78E-01 | Gm37216       | 0,39 | No  |
| ENSMUSG00000102953 | 1,01E+00  | -0,641601074 | 6,90E+00  | 8,62E-03 | 8,37E-02 | Gm37019       | 2,02 | No  |
| ENSMUSG00000102956 | 9,01E-03  | -3,107646452 | -5,16E-10 | 1,00E+00 | 1,00E+00 | Gm37017       | 1,01 | No  |
| ENSMUSG00000102959 | -1,88E+00 | -2,896123833 | 1,42E+00  | 2,33E-01 | 5,50E-01 | Gm37015       | 0,27 | No  |
| ENSMUSG00000102961 | 2,77E-01  | 2,090285186  | 3,48E+00  | 6,20E-02 | 3,10E-01 | Gm19918       | 1,21 | No  |
| ENSMUSG00000102964 | -2,12E-01 | 2,663593697  | 2,72E+00  | 9,91E-02 | 3,92E-01 | 9430034N14Rik | 0,86 | No  |
| ENSMUSG00000102970 | -5,50E-02 | -1,627555991 | 8,48E-03  | 9,27E-01 | 1,00E+00 | Gm37349       | 0,96 | No  |
| ENSMUSG00000102972 | -1,58E-02 | 0,609336897  | 4,41E-03  | 9,47E-01 | 1,00E+00 | Gm37348       | 0,99 | No  |
| ENSMUSG00000102973 | -2,68E+00 | -3,033645766 | 2,84E+00  | 9,17E-02 | 3,82E-01 | E430014B02Rik | 0,16 | No  |
| ENSMUSG00000102975 | -2,01E-01 | 3,141363539  | 3,41E+00  | 6,48E-02 | 3,19E-01 | Gm37347       | 0,87 | No  |
| ENSMUSG00000102976 | -1,05E-02 | 6,27829097   | 2,69E-02  | 8,70E-01 | 1,00E+00 | Zc3h11a       | 0,99 | No  |
| ENSMUSG00000102982 | 9,41E-02  | -0,770698592 | 5,88E-02  | 8,08E-01 | 9,65E-01 | Gm38319       | 1,07 | No  |
| ENSMUSG00000102984 | -1,89E+00 | -2,96318033  | 1,43E+00  | 2,33E-01 | 5,50E-01 | Gm34727       | 0,27 | No  |
| ENSMUSG00000102985 | -1,85E+00 | -2,896089255 | 1,40E+00  | 2,37E-01 | 5,50E-01 | 4930456G14Rik | 0,28 | No  |
| ENSMUSG00000102987 | 1,87E+00  | -3,107639691 | 1,38E+00  | 2,40E-01 | 5,50E-01 | Gm38324       | 3,67 | No  |
| ENSMUSG00000102989 | -8,12E-01 | -2,896138345 | 3,61E-01  | 5,48E-01 | 8,15E-01 | Gm38318       | 0,57 | No  |
| ENSMUSG00000102990 | -1,86E+00 | -3,033612668 | 1,39E+00  | 2,38E-01 | 5,50E-01 | Gm37764       | 0,28 | No  |

|                    |           |              |           |          |          |               |      |    |
|--------------------|-----------|--------------|-----------|----------|----------|---------------|------|----|
| ENSMUSG00000102994 | -1,89E+00 | -3,1076441   | 1,42E+00  | 2,33E-01 | 5,50E-01 | Gm37767       | 0,27 | No |
| ENSMUSG00000102995 | 4,17E-01  | 0,710866943  | 3,27E+00  | 7,04E-02 | 3,35E-01 | A330074H02Rik | 1,34 | No |
| ENSMUSG00000102997 | 1,86E+00  | -3,033646451 | 1,35E+00  | 2,46E-01 | 5,50E-01 | Gm17244       | 3,62 | No |
| ENSMUSG00000103000 | -1,58E+00 | -1,770581457 | 5,66E+00  | 1,74E-02 | 1,38E-01 | Gm37900       | 0,33 | No |
| ENSMUSG00000103001 | 3,05E-01  | 0,697061856  | 1,72E+00  | 1,89E-01 | 5,50E-01 | A930005N03Rik | 1,24 | No |
| ENSMUSG00000103002 | 9,01E-03  | -3,107646452 | -5,16E-10 | 1,00E+00 | 1,00E+00 | Gm38075       | 1,01 | No |
| ENSMUSG00000103006 | -8,74E-01 | -2,033696836 | 1,37E+00  | 2,41E-01 | 5,50E-01 | 4933417C20Rik | 0,55 | No |
| ENSMUSG00000103007 | -1,29E-01 | -2,432887858 | 1,68E-02  | 8,97E-01 | 1,00E+00 | Gm20690       | 0,91 | No |
| ENSMUSG00000103009 | -3,31E-02 | 3,131143128  | 9,10E-02  | 7,63E-01 | 9,38E-01 | Gm4430        | 0,98 | No |
| ENSMUSG00000103011 | -2,63E-02 | -3,033653157 | 2,33E-04  | 9,88E-01 | 1,00E+00 | Gm8860        | 0,98 | No |
| ENSMUSG00000103013 | -3,46E-01 | -0,912534882 | 5,87E-01  | 4,44E-01 | 7,35E-01 | Gm37503       | 0,79 | No |
| ENSMUSG00000103015 | -1,94E+00 | -3,107619243 | 1,50E+00  | 2,21E-01 | 5,50E-01 | Gm37549       | 0,26 | No |
| ENSMUSG00000103016 | -1,70E+00 | -1,682924119 | 6,74E+00  | 9,43E-03 | 8,94E-02 | Gm37506       | 0,31 | No |
| ENSMUSG00000103018 | 4,58E-01  | 0,445109354  | 3,18E+00  | 7,44E-02 | 3,47E-01 | Gm17968       | 1,37 | No |
| ENSMUSG00000103024 | 4,96E-01  | -1,863752407 | 4,77E-01  | 4,90E-01 | 7,76E-01 | Gm37685       | 1,41 | No |
| ENSMUSG00000103030 | -6,21E-02 | 0,621593455  | 6,74E-02  | 7,95E-01 | 9,57E-01 | E330011M16Rik | 0,96 | No |
| ENSMUSG00000103031 | 1,86E+00  | -3,033661846 | 1,35E+00  | 2,46E-01 | 5,50E-01 | Gm29950       | 3,62 | No |
| ENSMUSG00000103032 | 2,94E-01  | 1,583957635  | 2,94E+00  | 8,63E-02 | 3,78E-01 | Gm37121       | 1,23 | No |
| ENSMUSG00000103034 | -1,69E-01 | 5,693130133  | 6,22E+00  | 1,26E-02 | 1,11E-01 | Gm8797        | 0,89 | No |
| ENSMUSG00000103037 | -3,15E-01 | -2,00859593  | 1,92E-01  | 6,61E-01 | 8,82E-01 | Pcdhgb1       | 0,80 | No |
| ENSMUSG00000103038 | -7,16E-02 | -2,226359765 | 8,30E-03  | 9,27E-01 | 1,00E+00 | Gm37124       | 0,95 | No |
| ENSMUSG00000103039 | 3,35E-01  | 0,36531173   | 1,72E+00  | 1,90E-01 | 5,50E-01 | Gm37123       | 1,26 | No |
| ENSMUSG00000103041 | 1,80E-02  | 3,91056258   | 3,90E-02  | 8,43E-01 | 9,85E-01 | Gm37305       | 1,01 | No |
| ENSMUSG00000103042 | 3,22E-01  | -1,522703097 | 3,59E-01  | 5,49E-01 | 8,16E-01 | Gm2719        | 1,25 | No |
| ENSMUSG00000103043 | 7,26E-01  | -2,146040341 | 9,40E-01  | 3,32E-01 | 6,33E-01 | Gm37306       | 1,65 | No |
| ENSMUSG00000103045 | 1,27E-01  | -2,268192474 | 2,79E-02  | 8,67E-01 | 9,99E-01 | Gm37308       | 1,09 | No |
| ENSMUSG00000103046 | 1,88E-01  | 0,721295363  | 6,74E-01  | 4,12E-01 | 7,07E-01 | Gm37309       | 1,14 | No |
| ENSMUSG00000103047 | -1,89E+00 | -3,1076441   | 1,42E+00  | 2,33E-01 | 5,50E-01 | Gm37310       | 0,27 | No |
| ENSMUSG00000103049 | -1,90E+00 | -3,033647263 | 1,44E+00  | 2,30E-01 | 5,50E-01 | Gm37311       | 0,27 | No |
| ENSMUSG00000103051 | -1,25E+00 | -2,711657407 | 1,51E+00  | 2,20E-01 | 5,50E-01 | Gm7871        | 0,42 | No |
| ENSMUSG00000103053 | -1,87E+00 | -3,033619006 | 1,41E+00  | 2,36E-01 | 5,50E-01 | Gm38271       | 0,27 | No |
| ENSMUSG00000103056 | -1,94E+00 | -3,107619243 | 1,50E+00  | 2,21E-01 | 5,50E-01 | Gm38268       | 0,26 | No |

|                    |           |              |           |          |          |               |      |     |
|--------------------|-----------|--------------|-----------|----------|----------|---------------|------|-----|
| ENSMUSG00000103062 | 5,26E-01  | -1,711835484 | 8,23E-01  | 3,64E-01 | 6,65E-01 | Gm37200       | 1,44 | No  |
| ENSMUSG00000103065 | -5,27E-01 | -2,26816282  | 4,45E-01  | 5,05E-01 | 7,89E-01 | Gm20236       | 0,69 | No  |
| ENSMUSG00000103070 | 1,82E+00  | -3,033667329 | 1,31E+00  | 2,52E-01 | 5,50E-01 | Gm37903       | 3,54 | No  |
| ENSMUSG00000103071 | -7,59E-02 | -2,548265265 | 3,80E-03  | 9,51E-01 | 1,00E+00 | Gm38110       | 0,95 | No  |
| ENSMUSG00000103072 | 4,09E-01  | -1,600540739 | 5,02E-01  | 4,79E-01 | 7,66E-01 | Gm37905       | 1,33 | No  |
| ENSMUSG00000103073 | 1,87E+00  | -3,107639691 | 1,38E+00  | 2,40E-01 | 5,50E-01 | Gm37904       | 3,67 | No  |
| ENSMUSG00000103075 | -1,23E+00 | -1,896083835 | 3,60E+00  | 5,76E-02 | 2,96E-01 | Gm38109       | 0,43 | No  |
| ENSMUSG00000103076 | -1,60E-02 | 0,483505892  | 4,50E-03  | 9,47E-01 | 1,00E+00 | Gm37902       | 0,99 | No  |
| ENSMUSG00000103079 | 7,52E-01  | -2,770617729 | 3,07E-01  | 5,79E-01 | 8,36E-01 | Gm36307       | 1,68 | No  |
| ENSMUSG00000103081 | 1,57E-02  | -1,779610763 | 6,51E-04  | 9,80E-01 | 1,00E+00 | Pcdhgb8       | 1,01 | No  |
| ENSMUSG00000103083 | -2,51E-01 | -0,126654335 | 6,57E-01  | 4,17E-01 | 7,12E-01 | A630035G10Rik | 0,84 | No  |
| ENSMUSG00000103085 | -2,27E+00 | -1,448401352 | 1,21E+01  | 4,98E-04 | 9,14E-03 | Gm38120       | 0,21 | Yes |
| ENSMUSG00000103087 | 1,84E+00  | -3,033649193 | 1,33E+00  | 2,49E-01 | 5,50E-01 | Gm38122       | 3,58 | No  |
| ENSMUSG00000103088 | -1,20E-01 | -1,87338802  | 3,32E-02  | 8,55E-01 | 9,92E-01 | Pcdhgb6       | 0,92 | No  |
| ENSMUSG00000103089 | -6,92E-01 | -2,01568666  | 9,55E-01  | 3,28E-01 | 6,29E-01 | Gm38118       | 0,62 | No  |
| ENSMUSG00000103092 | 4,82E-03  | -3,17446542  | 1,60E-11  | 1,00E+00 | 1,00E+00 | Pcdha5        | 1,00 | No  |
| ENSMUSG00000103094 | -2,08E-01 | 1,964257186  | 1,74E+00  | 1,88E-01 | 5,50E-01 | Gm37558       | 0,87 | No  |
| ENSMUSG00000103098 | -3,22E+00 | -2,770607184 | 4,36E+00  | 3,68E-02 | 2,28E-01 | Gm37559       | 0,11 | No  |
| ENSMUSG00000103101 | -7,13E-01 | -2,185569351 | 8,66E-01  | 3,52E-01 | 6,53E-01 | Gm37048       | 0,61 | No  |
| ENSMUSG00000103103 | -4,72E-02 | 1,179013979  | 6,20E-02  | 8,03E-01 | 9,62E-01 | 4833445I07Rik | 0,97 | No  |
| ENSMUSG00000103105 | -6,99E-01 | -2,35556688  | 8,30E-01  | 3,62E-01 | 6,64E-01 | Gm18752       | 0,62 | No  |
| ENSMUSG00000103108 | 9,01E-03  | -3,107646452 | -5,16E-10 | 1,00E+00 | 1,00E+00 | Rncr4         | 1,01 | No  |
| ENSMUSG00000103114 | -4,79E-01 | -1,683120497 | 6,10E-01  | 4,35E-01 | 7,28E-01 | Gm32200       | 0,72 | No  |
| ENSMUSG00000103119 | -4,73E-02 | -2,831943748 | 1,04E-03  | 9,74E-01 | 1,00E+00 | Gm37583       | 0,97 | No  |
| ENSMUSG00000103122 | -5,88E-02 | -3,033652696 | 1,62E-03  | 9,68E-01 | 1,00E+00 | Gm37391       | 0,96 | No  |
| ENSMUSG00000103123 | -5,88E-02 | -3,033616507 | 1,62E-03  | 9,68E-01 | 1,00E+00 | Gm37390       | 0,96 | No  |
| ENSMUSG00000103124 | 6,10E-01  | -2,998032732 | 1,48E-01  | 7,00E-01 | 9,05E-01 | Gm37389       | 1,53 | No  |
| ENSMUSG00000103125 | 1,04E-01  | -3,097053687 | 3,98E-03  | 9,50E-01 | 1,00E+00 | Gm37388       | 1,07 | No  |
| ENSMUSG00000103131 | -2,27E+00 | -2,600659803 | 4,18E+00  | 4,09E-02 | 2,40E-01 | Gm37977       | 0,21 | No  |
| ENSMUSG00000103132 | -1,15E+00 | -2,185496901 | 2,16E+00  | 1,42E-01 | 4,76E-01 | Gm37978       | 0,45 | No  |
| ENSMUSG00000103133 | 8,37E-02  | 0,175883252  | 9,15E-02  | 7,62E-01 | 9,38E-01 | Gm37303       | 1,06 | No  |
| ENSMUSG00000103135 | 3,21E-01  | -0,832021451 | 5,47E-01  | 4,59E-01 | 7,49E-01 | Gm37979       | 1,25 | No  |

|                    |           |              |           |          |          |               |      |     |
|--------------------|-----------|--------------|-----------|----------|----------|---------------|------|-----|
| ENSMUSG00000103137 | -9,57E-02 | 1,227497748  | 2,53E-01  | 6,15E-01 | 8,54E-01 | Gm37981       | 0,94 | No  |
| ENSMUSG00000103138 | -6,82E-01 | -1,126569716 | 2,28E+00  | 1,31E-01 | 4,55E-01 | Gm2238        | 0,62 | No  |
| ENSMUSG00000103139 | 1,24E+00  | -1,655235106 | 3,25E+00  | 7,15E-02 | 3,39E-01 | Gm37982       | 2,36 | No  |
| ENSMUSG00000103144 | 9,19E-02  | -1,151977387 | 4,07E-02  | 8,40E-01 | 9,83E-01 | Pcdhga1       | 1,07 | No  |
| ENSMUSG00000103145 | -1,74E+00 | -2,600646379 | 2,10E+00  | 1,47E-01 | 4,86E-01 | Gm37744       | 0,30 | No  |
| ENSMUSG00000103146 | -4,92E-01 | -2,08880916  | 3,17E-01  | 5,73E-01 | 8,33E-01 | Gm37745       | 0,71 | No  |
| ENSMUSG00000103147 | -2,18E-01 | -1,185549271 | 2,23E-01  | 6,37E-01 | 8,68E-01 | Gm7341        | 0,86 | No  |
| ENSMUSG00000103148 | 4,24E-02  | -3,033592245 | -1,17E-09 | 1,00E+00 | 1,00E+00 | Gm37746       | 1,03 | No  |
| ENSMUSG00000103149 | -3,09E-01 | -2,268142833 | 1,43E-01  | 7,05E-01 | 9,07E-01 | AA914427      | 0,81 | No  |
| ENSMUSG00000103151 | -3,59E+00 | -2,548182391 | 5,81E+00  | 1,60E-02 | 1,31E-01 | Gm38292       | 0,08 | No  |
| ENSMUSG00000103155 | 1,62E-03  | -2,963242114 | -1,56E-12 | 1,00E+00 | 1,00E+00 | Gm8109        | 1,00 | No  |
| ENSMUSG00000103156 | 1,53E+00  | -2,448792881 | 2,55E+00  | 1,10E-01 | 4,07E-01 | Gm38293       | 2,89 | No  |
| ENSMUSG00000103159 | -2,92E+00 | -1,472727459 | 1,41E+01  | 1,78E-04 | 3,94E-03 | F830112A20Rik | 0,13 | Yes |
| ENSMUSG00000103160 | 8,97E-01  | -1,998063351 | 1,51E+00  | 2,20E-01 | 5,50E-01 | C130012C08Rik | 1,86 | No  |
| ENSMUSG00000103162 | 1,63E-01  | -2,268094167 | 3,96E-02  | 8,42E-01 | 9,85E-01 | Gm38147       | 1,12 | No  |
| ENSMUSG00000103163 | -1,69E+00 | -2,770582871 | 1,99E+00  | 1,59E-01 | 5,06E-01 | Gm38146       | 0,31 | No  |
| ENSMUSG00000103164 | -2,02E+00 | -2,522612283 | 3,09E+00  | 7,89E-02 | 3,59E-01 | Gm38150       | 0,25 | No  |
| ENSMUSG00000103165 | -8,07E-01 | -0,383943048 | 5,75E+00  | 1,65E-02 | 1,34E-01 | Gm37560       | 0,57 | No  |
| ENSMUSG00000103168 | -1,94E+00 | -3,107619243 | 1,50E+00  | 2,21E-01 | 5,50E-01 | Gm30948       | 0,26 | No  |
| ENSMUSG00000103170 | -7,93E-01 | -2,448634481 | 9,14E-01  | 3,39E-01 | 6,39E-01 | Gm37170       | 0,58 | No  |
| ENSMUSG00000103174 | 3,98E-01  | 2,451699266  | 9,08E+00  | 2,58E-03 | 3,42E-02 | Gm37168       | 1,32 | Yes |
| ENSMUSG00000103175 | 1,26E+00  | -2,896169772 | 9,87E-01  | 3,21E-01 | 6,21E-01 | Gm37169       | 2,39 | No  |
| ENSMUSG00000103178 | -7,91E-02 | 1,309519185  | 1,84E-01  | 6,68E-01 | 8,86E-01 | Fgfr3-ps      | 0,95 | No  |
| ENSMUSG00000103179 | -1,89E+00 | -3,1076441   | 1,42E+00  | 2,33E-01 | 5,50E-01 | Gm37171       | 0,27 | No  |
| ENSMUSG00000103180 | 2,65E+00  | -3,033655087 | 2,73E+00  | 9,86E-02 | 3,91E-01 | Gm37089       | 6,30 | No  |
| ENSMUSG00000103182 | 4,55E-01  | -1,711599889 | 5,71E-01  | 4,50E-01 | 7,40E-01 | Gm37091       | 1,37 | No  |
| ENSMUSG00000103183 | -2,36E-01 | 0,672390228  | 1,14E+00  | 2,86E-01 | 5,82E-01 | Gm37090       | 0,85 | No  |
| ENSMUSG00000103186 | -4,69E-01 | -0,117139159 | 2,27E+00  | 1,32E-01 | 4,56E-01 | Gm37088       | 0,72 | No  |
| ENSMUSG00000103189 | -5,20E-01 | -0,236453696 | 2,64E+00  | 1,04E-01 | 3,97E-01 | Gm37092       | 0,70 | No  |
| ENSMUSG00000103191 | -3,21E+00 | -2,896117057 | 4,33E+00  | 3,75E-02 | 2,30E-01 | Gm37646       | 0,11 | No  |
| ENSMUSG00000103192 | -8,55E-01 | -0,51003935  | 5,34E+00  | 2,09E-02 | 1,55E-01 | Gm37645       | 0,55 | No  |
| ENSMUSG00000103194 | -1,94E+00 | -3,107619243 | 1,50E+00  | 2,21E-01 | 5,50E-01 | Gm37643       | 0,26 | No  |



|                    |           |              |           |          |          |         |      |     |
|--------------------|-----------|--------------|-----------|----------|----------|---------|------|-----|
| ENSMUSG00000103197 | -1,06E+00 | -0,107515013 | 1,17E+01  | 6,41E-04 | 1,12E-02 | Gm37642 | 0,48 | Yes |
| ENSMUSG00000103198 | -3,40E+00 | -2,740825552 | 5,04E+00  | 2,48E-02 | 1,74E-01 | Gm9136  | 0,09 | No  |
| ENSMUSG00000103199 | -6,89E-01 | -0,755474829 | 2,61E+00  | 1,06E-01 | 3,99E-01 | Gm37648 | 0,62 | No  |
| ENSMUSG00000103200 | 2,13E+00  | -2,548299491 | 3,63E+00  | 5,67E-02 | 2,93E-01 | Gm37328 | 4,38 | No  |
| ENSMUSG00000103206 | 2,63E-02  | 4,993318727  | 1,26E-01  | 7,23E-01 | 9,17E-01 | Gm8515  | 1,02 | No  |
| ENSMUSG00000103207 | -1,68E+00 | -1,831872806 | 5,47E+00  | 1,93E-02 | 1,48E-01 | Gm9874  | 0,31 | No  |
| ENSMUSG00000103213 | 7,78E-01  | -2,83196814  | 3,28E-01  | 5,67E-01 | 8,29E-01 | Gm38289 | 1,71 | No  |
| ENSMUSG00000103215 | 1,84E+00  | -3,033649193 | 1,33E+00  | 2,49E-01 | 5,50E-01 | Gm38388 | 3,58 | No  |
| ENSMUSG00000103216 | -1,92E+00 | -3,033623267 | 1,46E+00  | 2,27E-01 | 5,50E-01 | Gm37248 | 0,26 | No  |
| ENSMUSG00000103217 | 1,74E-02  | -2,033656352 | 6,93E-04  | 9,79E-01 | 1,00E+00 | Gm38287 | 1,01 | No  |
| ENSMUSG00000103219 | -4,17E-02 | 3,421830485  | 1,75E-01  | 6,76E-01 | 8,91E-01 | Gm37787 | 0,97 | No  |
| ENSMUSG00000103220 | -2,66E+00 | -1,548023835 | 1,07E+01  | 1,08E-03 | 1,73E-02 | Gm37728 | 0,16 | Yes |
| ENSMUSG00000103222 | -8,12E-01 | -2,896127374 | 3,61E-01  | 5,48E-01 | 8,15E-01 | Gm37729 | 0,57 | No  |
| ENSMUSG00000103223 | 9,01E-03  | -3,107646452 | -5,16E-10 | 1,00E+00 | 1,00E+00 | Gm37730 | 1,01 | No  |
| ENSMUSG00000103224 | -2,74E-01 | -0,697275472 | 5,25E-01  | 4,69E-01 | 7,57E-01 | Gm2077  | 0,83 | No  |
| ENSMUSG00000103227 | -5,91E-02 | -1,088702884 | 1,39E-02  | 9,06E-01 | 1,00E+00 | Gm37733 | 0,96 | No  |
| ENSMUSG00000103230 | -1,98E-01 | 0,372296954  | 6,23E-01  | 4,30E-01 | 7,23E-01 | Gm17970 | 0,87 | No  |
| ENSMUSG00000103232 | 1,75E+00  | -2,497607468 | 3,53E+00  | 6,02E-02 | 3,04E-01 | Gm37160 | 3,36 | No  |
| ENSMUSG00000103233 | 2,23E-01  | -2,448723435 | 6,22E-02  | 8,03E-01 | 9,62E-01 | Gm37159 | 1,17 | No  |
| ENSMUSG00000103238 | -1,14E-01 | -0,64113201  | 8,31E-02  | 7,73E-01 | 9,44E-01 | Gm36527 | 0,92 | No  |
| ENSMUSG00000103242 | 2,61E+00  | -3,033672762 | 2,63E+00  | 1,05E-01 | 3,97E-01 | Gm34767 | 6,10 | No  |
| ENSMUSG00000103247 | -1,48E-03 | -0,785741968 | 1,24E-05  | 9,97E-01 | 1,00E+00 | Gm38091 | 1,00 | No  |
| ENSMUSG00000103251 | -3,72E-01 | -0,997909876 | 7,89E-01  | 3,74E-01 | 6,75E-01 | Gm37519 | 0,77 | No  |
| ENSMUSG00000103252 | -1,89E+00 | -3,033648118 | 1,42E+00  | 2,33E-01 | 5,50E-01 | Gm37521 | 0,27 | No  |
| ENSMUSG00000103255 | 4,82E-03  | -3,17446542  | 1,60E-11  | 1,00E+00 | 1,00E+00 | Pcdhac1 | 1,00 | No  |
| ENSMUSG00000103256 | -4,01E-02 | -2,963238858 | 7,31E-04  | 9,78E-01 | 1,00E+00 | Gm37647 | 0,97 | No  |
| ENSMUSG00000103257 | -1,87E+00 | -3,107637761 | 1,39E+00  | 2,38E-01 | 5,50E-01 | Gm7977  | 0,27 | No  |
| ENSMUSG00000103260 | -1,12E-02 | 4,469586783  | 1,89E-02  | 8,91E-01 | 1,00E+00 | Gm8146  | 0,99 | No  |
| ENSMUSG00000103261 | 7,73E-01  | -2,896122969 | 3,27E-01  | 5,68E-01 | 8,29E-01 | Gm36981 | 1,71 | No  |
| ENSMUSG00000103266 | 2,57E+00  | -2,963293044 | 2,56E+00  | 1,10E-01 | 4,06E-01 | Gm36979 | 5,93 | No  |
| ENSMUSG00000103270 | 1,32E-01  | 0,480430463  | 2,82E-01  | 5,95E-01 | 8,44E-01 | Gm37915 | 1,10 | No  |
| ENSMUSG00000103272 | 8,63E-01  | -0,912798214 | 4,04E+00  | 4,45E-02 | 2,51E-01 | Gm37914 | 1,82 | No  |

|                    |           |              |          |          |          |               |      |     |
|--------------------|-----------|--------------|----------|----------|----------|---------------|------|-----|
| ENSMUSG00000103273 | -5,69E-02 | -3,107650735 | 1,33E-03 | 9,71E-01 | 1,00E+00 | Gm37913       | 0,96 | No  |
| ENSMUSG00000103276 | -1,25E+00 | -2,655108777 | 1,50E+00 | 2,21E-01 | 5,50E-01 | Gm37917       | 0,42 | No  |
| ENSMUSG00000103280 | -1,14E+00 | -1,896121649 | 3,00E+00 | 8,34E-02 | 3,71E-01 | Gm37277       | 0,45 | No  |
| ENSMUSG00000103284 | -1,89E+00 | -3,1076441   | 1,42E+00 | 2,33E-01 | 5,50E-01 | 3110080007Rik | 0,27 | No  |
| ENSMUSG00000103285 | 5,17E-01  | -0,77076131  | 2,04E+00 | 1,53E-01 | 4,96E-01 | Gm37274       | 1,43 | No  |
| ENSMUSG00000103286 | -4,93E-01 | 2,329228296  | 1,35E+01 | 2,41E-04 | 5,08E-03 | Gm5850        | 0,71 | Yes |
| ENSMUSG00000103291 | -1,02E+00 | -2,185605934 | 1,60E+00 | 2,06E-01 | 5,50E-01 | Gm38235       | 0,49 | No  |
| ENSMUSG00000103293 | -1,58E-03 | 0,361947061  | 3,74E-05 | 9,95E-01 | 1,00E+00 | Gm5842        | 1,00 | No  |
| ENSMUSG00000103294 | 1,87E+00  | -3,107639691 | 1,38E+00 | 2,40E-01 | 5,50E-01 | Gm38233       | 3,67 | No  |
| ENSMUSG00000103299 | -1,88E+00 | -2,963263387 | 1,42E+00 | 2,33E-01 | 5,50E-01 | Gm38231       | 0,27 | No  |
| ENSMUSG00000103301 | -6,34E-02 | -2,107665929 | 6,52E-03 | 9,36E-01 | 1,00E+00 | Gm37804       | 0,96 | No  |
| ENSMUSG00000103303 | 1,22E+00  | -3,033612259 | 6,78E-01 | 4,10E-01 | 7,06E-01 | Gm37802       | 2,33 | No  |
| ENSMUSG00000103304 | -1,87E+00 | -3,107637761 | 1,39E+00 | 2,38E-01 | 5,50E-01 | Gm5979        | 0,27 | No  |
| ENSMUSG00000103308 | 5,48E-01  | 0,156087136  | 3,59E+00 | 5,81E-02 | 2,97E-01 | Gm37800       | 1,46 | No  |
| ENSMUSG00000103309 | -3,16E-01 | -1,024696161 | 4,95E-01 | 4,82E-01 | 7,69E-01 | BC037039      | 0,80 | No  |
| ENSMUSG00000103310 | 4,82E-03  | -3,17446542  | 1,60E-11 | 1,00E+00 | 1,00E+00 | Pcdha12       | 1,00 | No  |
| ENSMUSG00000103313 | -1,02E-02 | 2,146874149  | 5,25E-03 | 9,42E-01 | 1,00E+00 | Gm38357       | 0,99 | No  |
| ENSMUSG00000103314 | 7,55E-01  | -2,896158401 | 3,11E-01 | 5,77E-01 | 8,35E-01 | Gm38358       | 1,69 | No  |
| ENSMUSG00000103317 | -1,53E+00 | -2,146076491 | 3,36E+00 | 6,67E-02 | 3,25E-01 | Gm38359       | 0,35 | No  |
| ENSMUSG00000103318 | 4,40E-01  | -2,831998257 | 1,51E-01 | 6,97E-01 | 9,03E-01 | Gm38356       | 1,36 | No  |
| ENSMUSG00000103329 | -2,68E+00 | -3,033645766 | 2,84E+00 | 9,17E-02 | 3,82E-01 | Gm42492       | 0,16 | No  |
| ENSMUSG00000103332 | -3,23E-01 | -1,582103673 | 3,38E-01 | 5,61E-01 | 8,24E-01 | Pcdhga2       | 0,80 | No  |
| ENSMUSG00000103336 | 2,48E-01  | -1,472983859 | 2,06E-01 | 6,50E-01 | 8,76E-01 | Gm37993       | 1,19 | No  |
| ENSMUSG00000103341 | 1,79E-01  | -1,257583777 | 1,42E-01 | 7,06E-01 | 9,08E-01 | 1700051022Rik | 1,13 | No  |
| ENSMUSG00000103343 | 2,07E-01  | -2,448711056 | 6,42E-02 | 8,00E-01 | 9,60E-01 | Gm37052       | 1,15 | No  |
| ENSMUSG00000103346 | -1,87E+00 | -3,107637761 | 1,39E+00 | 2,38E-01 | 5,50E-01 | C230057A21Rik | 0,27 | No  |
| ENSMUSG00000103348 | -2,02E+00 | -2,627686254 | 3,10E+00 | 7,82E-02 | 3,57E-01 | Gm37053       | 0,25 | No  |
| ENSMUSG00000103349 | 6,20E-01  | -2,497608641 | 4,29E-01 | 5,13E-01 | 7,95E-01 | Gm36888       | 1,54 | No  |
| ENSMUSG00000103355 | 1,01E-01  | 2,491212185  | 5,99E-01 | 4,39E-01 | 7,31E-01 | Gm2147        | 1,07 | No  |
| ENSMUSG00000103357 | 2,13E+00  | -2,497702011 | 3,63E+00 | 5,67E-02 | 2,93E-01 | Gm7804        | 4,38 | No  |
| ENSMUSG00000103358 | 7,09E-01  | -2,711745905 | 2,75E-01 | 6,00E-01 | 8,46E-01 | Gm37593       | 1,64 | No  |
| ENSMUSG00000103360 | -4,47E-01 | -2,5482458   | 2,04E-01 | 6,51E-01 | 8,77E-01 | Gm38156       | 0,73 | No  |

|                    |           |              |           |          |          |         |      |     |
|--------------------|-----------|--------------|-----------|----------|----------|---------|------|-----|
| ENSMUSG00000103364 | -5,56E-01 | -2,832021161 | 2,41E-01  | 6,23E-01 | 8,58E-01 | Gm38157 | 0,68 | No  |
| ENSMUSG00000103367 | 3,80E-02  | 1,259133673  | 4,11E-02  | 8,39E-01 | 9,83E-01 | Gm38158 | 1,03 | No  |
| ENSMUSG00000103368 | -2,70E+00 | -2,963266517 | 2,89E+00  | 8,90E-02 | 3,79E-01 | Gm36927 | 0,15 | No  |
| ENSMUSG00000103369 | 3,14E-02  | -3,107617333 | -7,69E-10 | 1,00E+00 | 1,00E+00 | Gm6546  | 1,02 | No  |
| ENSMUSG00000103370 | -2,66E+00 | -3,033639428 | 2,81E+00  | 9,35E-02 | 3,83E-01 | Gm37178 | 0,16 | No  |
| ENSMUSG00000103373 | -3,22E+00 | -2,548184738 | 4,35E+00  | 3,69E-02 | 2,28E-01 | Gm37238 | 0,11 | No  |
| ENSMUSG00000103374 | 1,89E+00  | -3,033614598 | 1,38E+00  | 2,40E-01 | 5,50E-01 | Gm37239 | 3,70 | No  |
| ENSMUSG00000103375 | -1,87E+00 | -3,107637761 | 1,39E+00  | 2,38E-01 | 5,50E-01 | Gm37181 | 0,27 | No  |
| ENSMUSG00000103378 | -3,93E-02 | -2,896146176 | 7,35E-04  | 9,78E-01 | 1,00E+00 | Gm37176 | 0,97 | No  |
| ENSMUSG00000103380 | 3,52E-03  | 2,167086923  | 5,78E-04  | 9,81E-01 | 1,00E+00 | Gm37756 | 1,00 | No  |
| ENSMUSG00000103382 | 5,19E-02  | -0,561077916 | 1,51E-02  | 9,02E-01 | 1,00E+00 | Gm37755 | 1,04 | No  |
| ENSMUSG00000103388 | -1,34E-01 | -0,08892233  | 1,91E-01  | 6,62E-01 | 8,83E-01 | Gm37581 | 0,91 | No  |
| ENSMUSG00000103390 | -3,83E-02 | -3,107651936 | -7,91E-11 | 1,00E+00 | 1,00E+00 | Gm38301 | 0,97 | No  |
| ENSMUSG00000103391 | -7,58E-01 | -1,165543624 | 2,55E+00  | 1,10E-01 | 4,07E-01 | Gm38302 | 0,59 | No  |
| ENSMUSG00000103392 | 1,15E-01  | 1,707747951  | 4,75E-01  | 4,91E-01 | 7,77E-01 | Gm38303 | 1,08 | No  |
| ENSMUSG00000103393 | 2,63E+00  | -2,929316018 | 2,67E+00  | 1,02E-01 | 3,95E-01 | Gm38304 | 6,17 | No  |
| ENSMUSG00000103396 | -6,61E-03 | 3,28931545   | 3,93E-03  | 9,50E-01 | 1,00E+00 | Gm38305 | 1,00 | No  |
| ENSMUSG00000103398 | 2,64E+00  | -3,033673223 | 2,69E+00  | 1,01E-01 | 3,92E-01 | Gm38307 | 6,23 | No  |
| ENSMUSG00000103400 | -8,40E-02 | 1,204455993  | 1,86E-01  | 6,66E-01 | 8,86E-01 | Gm15853 | 0,94 | No  |
| ENSMUSG00000103403 | -6,04E-01 | -2,711716385 | 2,86E-01  | 5,93E-01 | 8,42E-01 | Gm37931 | 0,66 | No  |
| ENSMUSG00000103404 | 1,81E+00  | -3,10765737  | 1,28E+00  | 2,58E-01 | 5,50E-01 | Gm37932 | 3,49 | No  |
| ENSMUSG00000103406 | -1,71E+00 | -1,226260355 | 1,43E+01  | 1,60E-04 | 3,59E-03 | Gm5541  | 0,30 | Yes |
| ENSMUSG00000103408 | -1,23E-04 | -1,929362749 | 4,64E-08  | 1,00E+00 | 1,00E+00 | Gm37933 | 1,00 | No  |
| ENSMUSG00000103409 | -4,16E-01 | -1,816409783 | 5,02E-01  | 4,79E-01 | 7,66E-01 | Lsmem2  | 0,75 | No  |
| ENSMUSG00000103411 | -1,87E+00 | -3,107637761 | 1,39E+00  | 2,38E-01 | 5,50E-01 | Gm18300 | 0,27 | No  |
| ENSMUSG00000103415 | -3,15E-02 | -2,832013004 | 6,31E-04  | 9,80E-01 | 1,00E+00 | Gm37339 | 0,98 | No  |
| ENSMUSG00000103419 | 2,73E-01  | 2,637494102  | 4,86E+00  | 2,74E-02 | 1,87E-01 | Gm29808 | 1,21 | No  |
| ENSMUSG00000103421 | -1,27E+00 | -3,146104694 | 7,49E-01  | 3,87E-01 | 6,87E-01 | Golt1a  | 0,42 | No  |
| ENSMUSG00000103422 | 1,81E+00  | -2,963282131 | 1,30E+00  | 2,54E-01 | 5,50E-01 | Gm37536 | 3,50 | No  |
| ENSMUSG00000103423 | -2,51E-01 | 1,311951611  | 1,81E+00  | 1,79E-01 | 5,40E-01 | Gm5845  | 0,84 | No  |
| ENSMUSG00000103424 | 1,69E-02  | -1,247066839 | 1,37E-03  | 9,71E-01 | 1,00E+00 | Gm37535 | 1,01 | No  |
| ENSMUSG00000103427 | 5,70E-01  | -0,333406986 | 2,90E+00  | 8,85E-02 | 3,79E-01 | Gm37534 | 1,48 | No  |

|                    |           |              |           |          |          |               |      |     |
|--------------------|-----------|--------------|-----------|----------|----------|---------------|------|-----|
| ENSMUSG00000103432 | -1,93E+00 | -0,963107335 | 1,62E+01  | 5,71E-05 | 1,52E-03 | 6720464F23Rik | 0,26 | Yes |
| ENSMUSG00000103433 | -6,63E-02 | 2,968985922  | 3,46E-01  | 5,56E-01 | 8,21E-01 | Gm2272        | 0,96 | No  |
| ENSMUSG00000103435 | 3,71E-01  | -0,316802149 | 1,24E+00  | 2,65E-01 | 5,60E-01 | Gm36992       | 1,29 | No  |
| ENSMUSG00000103438 | -3,83E-02 | -3,107651936 | -7,91E-11 | 1,00E+00 | 1,00E+00 | Gm36991       | 0,97 | No  |
| ENSMUSG00000103439 | -3,13E-01 | 3,455149998  | 1,01E+01  | 1,51E-03 | 2,24E-02 | Gm7019        | 0,80 | Yes |
| ENSMUSG00000103440 | -5,81E-01 | -2,070146153 | 7,37E-01  | 3,91E-01 | 6,91E-01 | Gm37131       | 0,67 | No  |
| ENSMUSG00000103441 | -1,90E+00 | -2,896159266 | 1,44E+00  | 2,30E-01 | 5,50E-01 | 7530428D23Rik | 0,27 | No  |
| ENSMUSG00000103442 | 4,82E-03  | -3,17446542  | 1,60E-11  | 1,00E+00 | 1,00E+00 | Pcdha1        | 1,00 | No  |
| ENSMUSG00000103443 | 7,97E-01  | -2,548167174 | 5,53E-01  | 4,57E-01 | 7,46E-01 | Gm37132       | 1,74 | No  |
| ENSMUSG00000103445 | 5,41E-01  | -0,998030303 | 1,47E+00  | 2,25E-01 | 5,50E-01 | Gm36948       | 1,45 | No  |
| ENSMUSG00000103449 | -3,83E-02 | -3,107651936 | -7,91E-11 | 1,00E+00 | 1,00E+00 | Gm37134       | 0,97 | No  |
| ENSMUSG00000103451 | 1,81E+00  | -3,10765737  | 1,28E+00  | 2,58E-01 | 5,50E-01 | Gm33973       | 3,49 | No  |
| ENSMUSG00000103452 | 5,06E-01  | -1,71169905  | 6,86E-01  | 4,07E-01 | 7,04E-01 | 1700008A23Rik | 1,42 | No  |
| ENSMUSG00000103454 | 1,82E+00  | -3,033667329 | 1,31E+00  | 2,52E-01 | 5,50E-01 | Gm38098       | 3,54 | No  |
| ENSMUSG00000103457 | 1,90E-01  | -1,472796956 | 1,01E-01  | 7,51E-01 | 9,32E-01 | Gm37042       | 1,14 | No  |
| ENSMUSG00000103458 | -4,12E-01 | -2,733229065 | 1,15E-01  | 7,34E-01 | 9,24E-01 | Gm42416       | 0,75 | No  |
| ENSMUSG00000103464 | -3,83E-02 | -3,107651936 | -7,91E-11 | 1,00E+00 | 1,00E+00 | Gm38246       | 0,97 | No  |
| ENSMUSG00000103467 | 1,34E-01  | -2,107620298 | 3,54E-02  | 8,51E-01 | 9,90E-01 | Gm38245       | 1,10 | No  |
| ENSMUSG00000103469 | -2,50E-01 | -1,785655816 | 1,78E-01  | 6,73E-01 | 8,90E-01 | Gm9910        | 0,84 | No  |
| ENSMUSG00000103472 | -2,18E-01 | -1,990988106 | 9,56E-02  | 7,57E-01 | 9,35E-01 | Pcdhga7       | 0,86 | No  |
| ENSMUSG00000103473 | -4,67E-01 | 1,672042971  | 8,43E+00  | 3,69E-03 | 4,46E-02 | Gm37696       | 0,72 | Yes |
| ENSMUSG00000103475 | -1,35E+00 | -2,655115968 | 1,14E+00  | 2,85E-01 | 5,82E-01 | Gm37697       | 0,39 | No  |
| ENSMUSG00000103481 | -8,78E-02 | -1,806260385 | 1,84E-02  | 8,92E-01 | 1,00E+00 | 1700016D08Rik | 0,94 | No  |
| ENSMUSG00000103485 | -1,03E+00 | -1,800963393 | 1,98E+00  | 1,59E-01 | 5,06E-01 | Gm38001       | 0,49 | No  |
| ENSMUSG00000103486 | 6,26E-01  | -2,107647208 | 6,16E-01  | 4,33E-01 | 7,26E-01 | Gm10657       | 1,54 | No  |
| ENSMUSG00000103493 | -4,60E-01 | -1,448649755 | 7,35E-01  | 3,91E-01 | 6,91E-01 | Gm37411       | 0,73 | No  |
| ENSMUSG00000103495 | -1,86E+00 | -3,033612668 | 1,39E+00  | 2,38E-01 | 5,50E-01 | Gm37409       | 0,28 | No  |
| ENSMUSG00000103497 | 2,56E-01  | -0,614195875 | 4,09E-01  | 5,22E-01 | 8,01E-01 | Gm37407       | 1,19 | No  |
| ENSMUSG00000103502 | -5,11E-01 | -2,863713823 | 1,31E-01  | 7,17E-01 | 9,14E-01 | 9330121J05Rik | 0,70 | No  |
| ENSMUSG00000103505 | -3,68E-01 | -2,070140638 | 1,70E-01  | 6,80E-01 | 8,93E-01 | Gm38374       | 0,78 | No  |
| ENSMUSG00000103506 | -1,02E+00 | -0,112235425 | 9,06E+00  | 2,62E-03 | 3,45E-02 | Gm38376       | 0,49 | Yes |
| ENSMUSG00000103507 | 9,21E-02  | 1,074976756  | 2,03E-01  | 6,52E-01 | 8,78E-01 | Gm38375       | 1,07 | No  |

|                    |           |              |          |          |          |               |      |     |
|--------------------|-----------|--------------|----------|----------|----------|---------------|------|-----|
| ENSMUSG00000103509 | -1,45E-01 | 3,024329456  | 1,69E+00 | 1,93E-01 | 5,50E-01 | Gm38372       | 0,90 | No  |
| ENSMUSG00000103513 | -2,70E+00 | -3,033614577 | 2,89E+00 | 8,93E-02 | 3,79E-01 | Gm34780       | 0,15 | No  |
| ENSMUSG00000103517 | 1,81E+00  | -3,10765737  | 1,28E+00 | 2,58E-01 | 5,50E-01 | Gm37432       | 3,49 | No  |
| ENSMUSG00000103520 | -9,08E-02 | 0,731892296  | 1,59E-01 | 6,90E-01 | 8,99E-01 | 1110025M09Rik | 0,94 | No  |
| ENSMUSG00000103522 | -4,11E+00 | -2,600713728 | 8,59E+00 | 3,37E-03 | 4,18E-02 | 9430087J23Rik | 0,06 | Yes |
| ENSMUSG00000103525 | -1,05E-01 | -2,831968746 | 7,63E-03 | 9,30E-01 | 1,00E+00 | Gm37262       | 0,93 | No  |
| ENSMUSG00000103527 | 6,64E-01  | -0,641343562 | 3,03E+00 | 8,19E-02 | 3,68E-01 | Gm37261       | 1,58 | No  |
| ENSMUSG00000103529 | -1,26E+00 | -3,033639609 | 7,30E-01 | 3,93E-01 | 6,93E-01 | A730089K16Rik | 0,42 | No  |
| ENSMUSG00000103532 | -4,26E-01 | -1,510001587 | 5,47E-01 | 4,59E-01 | 7,49E-01 | Gm4430        | 0,74 | No  |
| ENSMUSG00000103534 | -1,94E+00 | -3,107619243 | 1,50E+00 | 2,21E-01 | 5,50E-01 | Gm37835       | 0,26 | No  |
| ENSMUSG00000103537 | -7,50E-01 | -2,574206572 | 6,31E-01 | 4,27E-01 | 7,21E-01 | Gm37838       | 0,59 | No  |
| ENSMUSG00000103543 | 1,84E-01  | 0,768301392  | 6,99E-01 | 4,03E-01 | 7,01E-01 | Gm37669       | 1,14 | No  |
| ENSMUSG00000103546 | -7,40E-02 | -1,831905135 | 1,40E-02 | 9,06E-01 | 1,00E+00 | Gm37666       | 0,95 | No  |
| ENSMUSG00000103547 | 5,74E-01  | -1,770833717 | 8,57E-01 | 3,55E-01 | 6,56E-01 | Gm37665       | 1,49 | No  |
| ENSMUSG00000103548 | -2,49E-01 | 2,532448975  | 3,77E+00 | 5,23E-02 | 2,78E-01 | Gm37670       | 0,84 | No  |
| ENSMUSG00000103553 | -1,90E-01 | -1,68312053  | 1,05E-01 | 7,45E-01 | 9,29E-01 | Gm38218       | 0,88 | No  |
| ENSMUSG00000103556 | 8,86E-01  | -2,355629413 | 1,21E+00 | 2,72E-01 | 5,68E-01 | Gm38215       | 1,85 | No  |
| ENSMUSG00000103558 | -4,53E-01 | 1,860603829  | 8,17E+00 | 4,27E-03 | 4,97E-02 | Gm38220       | 0,73 | Yes |
| ENSMUSG00000103559 | 1,84E+00  | -3,033632273 | 1,33E+00 | 2,49E-01 | 5,50E-01 | Gm38221       | 3,58 | No  |
| ENSMUSG00000103560 | 4,37E-01  | -2,655140574 | 1,49E-01 | 6,99E-01 | 9,04E-01 | Gm38070       | 1,35 | No  |
| ENSMUSG00000103564 | -1,94E+00 | -3,107619243 | 1,50E+00 | 2,21E-01 | 5,50E-01 | Gm35067       | 0,26 | No  |
| ENSMUSG00000103567 | -4,77E-01 | -1,939394626 | 4,67E-01 | 4,94E-01 | 7,80E-01 | Pcdhga5       | 0,72 | No  |
| ENSMUSG00000103568 | 1,19E-01  | 0,295412083  | 1,93E-01 | 6,60E-01 | 8,82E-01 | Gm29741       | 1,09 | No  |
| ENSMUSG00000103569 | -1,73E-01 | 0,019715921  | 2,74E-01 | 6,01E-01 | 8,47E-01 | Gm38067       | 0,89 | No  |
| ENSMUSG00000103570 | 5,09E-01  | -0,22636612  | 2,41E+00 | 1,21E-01 | 4,33E-01 | C630004M23Rik | 1,42 | No  |
| ENSMUSG00000103572 | 2,46E-01  | -2,401276481 | 7,58E-02 | 7,83E-01 | 9,50E-01 | Gm37115       | 1,19 | No  |
| ENSMUSG00000103574 | 1,18E+00  | -2,146273678 | 2,35E+00 | 1,25E-01 | 4,42E-01 | Gm37116       | 2,26 | No  |
| ENSMUSG00000103576 | -5,59E-01 | -0,436390535 | 2,40E+00 | 1,21E-01 | 4,34E-01 | Gm38188       | 0,68 | No  |
| ENSMUSG00000103581 | 5,58E-02  | -0,226242665 | 3,30E-02 | 8,56E-01 | 9,93E-01 | Gm37833       | 1,04 | No  |
| ENSMUSG00000103583 | -1,87E+00 | -3,107637761 | 1,39E+00 | 2,38E-01 | 5,50E-01 | Gm38325       | 0,27 | No  |
| ENSMUSG00000103584 | -8,44E-01 | -1,770517253 | 1,93E+00 | 1,65E-01 | 5,16E-01 | Gm38053       | 0,56 | No  |
| ENSMUSG00000103585 | -2,89E-01 | -1,905989438 | 1,82E-01 | 6,70E-01 | 8,88E-01 | Pcdhgb4       | 0,82 | No  |

|                    |           |              |          |          |          |               |      |     |
|--------------------|-----------|--------------|----------|----------|----------|---------------|------|-----|
| ENSMUSG00000103586 | -1,22E+00 | -3,146113954 | 6,96E-01 | 4,04E-01 | 7,01E-01 | 5830405F06Rik | 0,43 | No  |
| ENSMUSG00000103588 | -4,24E-01 | -0,98928522  | 8,79E-01 | 3,48E-01 | 6,49E-01 | Gm18445       | 0,75 | No  |
| ENSMUSG00000103590 | 1,23E-01  | 0,229032971  | 1,77E-01 | 6,74E-01 | 8,90E-01 | Gm37353       | 1,09 | No  |
| ENSMUSG00000103591 | -7,36E-01 | -1,800918233 | 1,42E+00 | 2,34E-01 | 5,50E-01 | Gm38365       | 0,60 | No  |
| ENSMUSG00000103592 | -2,05E+00 | -2,548141802 | 3,17E+00 | 7,50E-02 | 3,48E-01 | Gm38364       | 0,24 | No  |
| ENSMUSG00000103593 | 1,02E+00  | 2,657436582  | 6,72E+01 | 2,41E-16 | 4,18E-14 | Gm37352       | 2,02 | Yes |
| ENSMUSG00000103596 | -8,90E-01 | -2,107535966 | 1,42E+00 | 2,33E-01 | 5,50E-01 | Gm37354       | 0,54 | No  |
| ENSMUSG00000103599 | -1,91E+00 | -2,998017434 | 1,45E+00 | 2,29E-01 | 5,50E-01 | Gm37356       | 0,27 | No  |
| ENSMUSG00000103603 | 1,81E+00  | -3,10765737  | 1,28E+00 | 2,58E-01 | 5,50E-01 | Gm37020       | 3,49 | No  |
| ENSMUSG00000103609 | -5,88E-02 | -3,033616507 | 1,62E-03 | 9,68E-01 | 1,00E+00 | Gm37022       | 0,96 | No  |
| ENSMUSG00000103611 | -1,88E+00 | -2,832021709 | 1,42E+00 | 2,34E-01 | 5,50E-01 | Gm37195       | 0,27 | No  |
| ENSMUSG00000103613 | 7,16E-01  | -2,355606979 | 5,94E-01 | 4,41E-01 | 7,33E-01 | Gm34882       | 1,64 | No  |
| ENSMUSG00000103614 | 1,23E+00  | -2,401396265 | 9,37E-01 | 3,33E-01 | 6,34E-01 | Gm37949       | 2,34 | No  |
| ENSMUSG00000103616 | -2,79E-01 | -1,472854652 | 2,54E-01 | 6,14E-01 | 8,53E-01 | 1700018A14Rik | 0,82 | No  |
| ENSMUSG00000103620 | -6,28E-02 | -2,832053906 | 2,67E-03 | 9,59E-01 | 1,00E+00 | Gm37359       | 0,96 | No  |
| ENSMUSG00000103621 | -3,63E-01 | 0,045586345  | 1,38E+00 | 2,39E-01 | 5,50E-01 | Gm38366       | 0,78 | No  |
| ENSMUSG00000103622 | -6,05E-01 | -2,070123792 | 8,61E-01 | 3,54E-01 | 6,55E-01 | Gm38391       | 0,66 | No  |
| ENSMUSG00000103624 | -5,89E-01 | -1,863749654 | 9,59E-01 | 3,27E-01 | 6,28E-01 | Gm3081        | 0,66 | No  |
| ENSMUSG00000103625 | -5,21E-02 | -1,831976979 | 6,34E-03 | 9,37E-01 | 1,00E+00 | Gm37357       | 0,96 | No  |
| ENSMUSG00000103629 | 4,63E-02  | -1,800994119 | 6,25E-03 | 9,37E-01 | 1,00E+00 | Gm5694        | 1,03 | No  |
| ENSMUSG00000103630 | 3,81E-01  | -1,574305823 | 4,33E-01 | 5,10E-01 | 7,93E-01 | Gm37242       | 1,30 | No  |
| ENSMUSG00000103631 | 1,85E+00  | -3,107657832 | 1,35E+00 | 2,46E-01 | 5,50E-01 | Gm38060       | 3,61 | No  |
| ENSMUSG00000103632 | -9,83E-01 | -0,12653834  | 1,03E+01 | 1,31E-03 | 2,01E-02 | Gm38329       | 0,51 | Yes |
| ENSMUSG00000103633 | -1,06E-01 | -3,033634182 | 5,86E-03 | 9,39E-01 | 1,00E+00 | Gm38328       | 0,93 | No  |
| ENSMUSG00000103634 | 1,12E+00  | -1,627809585 | 4,32E+00 | 3,77E-02 | 2,31E-01 | 3110062G12Rik | 2,17 | No  |
| ENSMUSG00000103636 | -5,59E-01 | -2,246930401 | 4,64E-01 | 4,96E-01 | 7,81E-01 | Gm38331       | 0,68 | No  |
| ENSMUSG00000103638 | -4,61E-02 | -2,205832722 | 3,67E-03 | 9,52E-01 | 1,00E+00 | Gm38327       | 0,97 | No  |
| ENSMUSG00000103641 | -6,46E-02 | -2,401335725 | 4,78E-03 | 9,45E-01 | 1,00E+00 | Gm19024       | 0,96 | No  |
| ENSMUSG00000103646 | 1,25E+00  | -2,185711597 | 2,12E+00 | 1,46E-01 | 4,83E-01 | Gm37706       | 2,37 | No  |
| ENSMUSG00000103647 | 2,63E+00  | -2,896149319 | 2,68E+00 | 1,02E-01 | 3,94E-01 | Gm37707       | 6,20 | No  |
| ENSMUSG00000103649 | 3,01E-01  | 0,128304256  | 1,07E+00 | 3,02E-01 | 5,98E-01 | Gm37768       | 1,23 | No  |
| ENSMUSG00000103651 | -2,47E-01 | 2,314503399  | 3,40E+00 | 6,53E-02 | 3,20E-01 | Gm37206       | 0,84 | No  |

|                    |           |              |           |          |          |               |      |    |
|--------------------|-----------|--------------|-----------|----------|----------|---------------|------|----|
| ENSMUSG00000103653 | 1,36E-01  | 4,865576992  | 3,16E+00  | 7,56E-02 | 3,50E-01 | Gstp-ps       | 1,10 | No |
| ENSMUSG00000103655 | -1,87E+00 | -3,107637761 | 1,39E+00  | 2,38E-01 | 5,50E-01 | Gm37202       | 0,27 | No |
| ENSMUSG00000103657 | -1,23E+00 | -1,378142277 | 5,73E+00  | 1,67E-02 | 1,35E-01 | Gm37204       | 0,43 | No |
| ENSMUSG00000103658 | 1,03E-01  | 2,062047296  | 4,62E-01  | 4,97E-01 | 7,82E-01 | Gm37201       | 1,07 | No |
| ENSMUSG00000103663 | 5,78E-02  | -0,278795816 | 3,32E-02  | 8,55E-01 | 9,92E-01 | 2900037B21Rik | 1,04 | No |
| ENSMUSG00000103672 | -5,19E-01 | -0,66895082  | 1,79E+00  | 1,81E-01 | 5,42E-01 | Gm37621       | 0,70 | No |
| ENSMUSG00000103674 | -4,85E-01 | -1,832021156 | 6,26E-01  | 4,29E-01 | 7,22E-01 | Gm37699       | 0,71 | No |
| ENSMUSG00000103676 | 3,39E-01  | 0,348586234  | 1,76E+00  | 1,84E-01 | 5,48E-01 | Gm38204       | 1,27 | No |
| ENSMUSG00000103677 | -1,28E-01 | -1,973592777 | 3,40E-02  | 8,54E-01 | 9,92E-01 | Pcdhga4       | 0,91 | No |
| ENSMUSG00000103680 | 1,81E+00  | -3,10765737  | 1,28E+00  | 2,58E-01 | 5,50E-01 | Gm37072       | 3,49 | No |
| ENSMUSG00000103685 | -2,96E-01 | -1,52257397  | 2,65E-01  | 6,07E-01 | 8,50E-01 | Gm37074       | 0,81 | No |
| ENSMUSG00000103686 | -8,34E-01 | -2,963223097 | 3,81E-01  | 5,37E-01 | 8,09E-01 | Gm37073       | 0,56 | No |
| ENSMUSG00000103688 | 1,81E+00  | -3,10765737  | 1,28E+00  | 2,58E-01 | 5,50E-01 | Gm6321        | 3,49 | No |
| ENSMUSG00000103693 | -1,29E+00 | -1,378236149 | 4,62E+00  | 3,16E-02 | 2,06E-01 | Gm37529       | 0,41 | No |
| ENSMUSG00000103696 | -1,25E+00 | -1,800903824 | 3,18E+00  | 7,45E-02 | 3,47E-01 | Gm37531       | 0,42 | No |
| ENSMUSG00000103698 | 9,01E-03  | -3,107646452 | -5,16E-10 | 1,00E+00 | 1,00E+00 | Gm17877       | 1,01 | No |
| ENSMUSG00000103701 | -5,88E-02 | -3,033616507 | 1,62E-03  | 9,68E-01 | 1,00E+00 | Gm10728       | 0,96 | No |
| ENSMUSG00000103703 | -2,13E-01 | -2,185661739 | 8,92E-02  | 7,65E-01 | 9,40E-01 | Gm42568       | 0,86 | No |
| ENSMUSG00000103705 | 2,06E-02  | -3,146103739 | -9,26E-10 | 1,00E+00 | 1,00E+00 | 4930518J20Rik | 1,01 | No |
| ENSMUSG00000103706 | 6,80E-01  | -1,146143779 | 1,93E+00  | 1,65E-01 | 5,16E-01 | 6820402A03Rik | 1,60 | No |
| ENSMUSG00000103707 | 4,82E-03  | -3,17446542  | 1,60E-11  | 1,00E+00 | 1,00E+00 | Pcdha6        | 1,00 | No |
| ENSMUSG00000103710 | 1,17E+00  | -3,14612376  | 6,40E-01  | 4,24E-01 | 7,18E-01 | D030062O11Rik | 2,26 | No |
| ENSMUSG00000103711 | -2,83E-01 | 0,270335608  | 1,12E+00  | 2,89E-01 | 5,85E-01 | Tstd1         | 0,82 | No |
| ENSMUSG00000103715 | 1,29E-01  | 0,554153734  | 2,80E-01  | 5,97E-01 | 8,45E-01 | 4933431K14Rik | 1,09 | No |
| ENSMUSG00000103717 | -4,37E-02 | -0,847654565 | 1,24E-02  | 9,11E-01 | 1,00E+00 | Gm38038       | 0,97 | No |
| ENSMUSG00000103720 | -7,89E-01 | -2,033659297 | 1,27E+00  | 2,60E-01 | 5,53E-01 | Gm37094       | 0,58 | No |
| ENSMUSG00000103722 | -6,58E-02 | -1,35548677  | 1,52E-02  | 9,02E-01 | 1,00E+00 | 2700078F05Rik | 0,96 | No |
| ENSMUSG00000103723 | -5,80E-01 | -2,711677114 | 2,64E-01  | 6,07E-01 | 8,50E-01 | Gm37095       | 0,67 | No |
| ENSMUSG00000103725 | 4,29E-01  | -2,711712445 | 1,43E-01  | 7,05E-01 | 9,07E-01 | Gm7103        | 1,35 | No |
| ENSMUSG00000103726 | 4,76E-01  | -0,683221239 | 1,52E+00  | 2,17E-01 | 5,50E-01 | Gm30074       | 1,39 | No |
| ENSMUSG00000103730 | 9,40E-02  | 5,268912825  | 1,74E+00  | 1,88E-01 | 5,50E-01 | Gm38316       | 1,07 | No |
| ENSMUSG00000103731 | -3,83E-01 | 0,281205659  | 1,91E+00  | 1,67E-01 | 5,20E-01 | Gm17530       | 0,77 | No |

|                    |           |              |           |          |          |               |      |     |
|--------------------|-----------|--------------|-----------|----------|----------|---------------|------|-----|
| ENSMUSG00000103733 | 2,02E-01  | 2,774012027  | 2,79E+00  | 9,47E-02 | 3,85E-01 | Gm6162        | 1,15 | No  |
| ENSMUSG00000103734 | -3,56E+00 | -2,832013804 | 5,69E+00  | 1,70E-02 | 1,36E-01 | Gm37651       | 0,08 | No  |
| ENSMUSG00000103735 | 3,65E-01  | 3,762384486  | 1,45E+01  | 1,43E-04 | 3,25E-03 | Gm38317       | 1,29 | Yes |
| ENSMUSG00000103736 | 1,23E+00  | -2,770653081 | 9,39E-01  | 3,33E-01 | 6,33E-01 | Gm37650       | 2,35 | No  |
| ENSMUSG00000103739 | -7,84E-02 | -1,655234117 | 1,58E-02  | 9,00E-01 | 1,00E+00 | Gm37653       | 0,95 | No  |
| ENSMUSG00000103741 | -2,30E+00 | -2,600650653 | 4,33E+00  | 3,75E-02 | 2,30E-01 | Gm38241       | 0,20 | No  |
| ENSMUSG00000103745 | -2,71E-01 | -2,226225512 | 1,28E-01  | 7,21E-01 | 9,16E-01 | Gm38237       | 0,83 | No  |
| ENSMUSG00000103746 | 5,25E-01  | -2,424884867 | 2,61E-01  | 6,09E-01 | 8,51E-01 | 1700001G17Rik | 1,44 | No  |
| ENSMUSG00000103747 | -4,47E-01 | -2,548239958 | 2,04E-01  | 6,51E-01 | 8,77E-01 | Gm38236       | 0,73 | No  |
| ENSMUSG00000103748 | -3,83E-02 | -3,107651936 | -7,91E-11 | 1,00E+00 | 1,00E+00 | Gm38243       | 0,97 | No  |
| ENSMUSG00000103749 | -6,21E-01 | -1,905993356 | 8,28E-01  | 3,63E-01 | 6,64E-01 | Pcdhgb5       | 0,65 | No  |
| ENSMUSG00000103753 | -1,47E+00 | -2,896073235 | 1,01E+00  | 3,15E-01 | 6,15E-01 | Gm6934        | 0,36 | No  |
| ENSMUSG00000103754 | 1,17E+00  | -2,832041407 | 8,38E-01  | 3,60E-01 | 6,61E-01 | Gm37284       | 2,25 | No  |
| ENSMUSG00000103756 | -1,03E-01 | -0,84774715  | 7,70E-02  | 7,81E-01 | 9,49E-01 | Gm37285       | 0,93 | No  |
| ENSMUSG00000103759 | -7,23E-02 | -1,863750987 | 8,45E-03  | 9,27E-01 | 1,00E+00 | Gm37288       | 0,95 | No  |
| ENSMUSG00000103760 | 1,21E-01  | 1,172022511  | 3,59E-01  | 5,49E-01 | 8,16E-01 | Gm8009        | 1,09 | No  |
| ENSMUSG00000103761 | 9,01E-03  | -3,107646452 | -5,16E-10 | 1,00E+00 | 1,00E+00 | Gm37859       | 1,01 | No  |
| ENSMUSG00000103762 | 1,85E+00  | -3,107657832 | 1,35E+00  | 2,46E-01 | 5,50E-01 | Gm37861       | 3,61 | No  |
| ENSMUSG00000103763 | -3,25E-01 | -0,683263028 | 5,91E-01  | 4,42E-01 | 7,34E-01 | Gm37860       | 0,80 | No  |
| ENSMUSG00000103764 | -1,71E+00 | -2,448606153 | 2,02E+00  | 1,55E-01 | 4,98E-01 | Gm18382       | 0,31 | No  |
| ENSMUSG00000103766 | 2,25E-01  | -2,333208497 | 6,39E-02  | 8,01E-01 | 9,61E-01 | Gm38392       | 1,17 | No  |
| ENSMUSG00000103767 | 1,87E+00  | -3,107639691 | 1,38E+00  | 2,40E-01 | 5,50E-01 | Gm37858       | 3,67 | No  |
| ENSMUSG00000103768 | -3,17E-02 | -2,65512814  | 8,91E-04  | 9,76E-01 | 1,00E+00 | Gm37856       | 0,98 | No  |
| ENSMUSG00000103770 | 4,82E-03  | -3,17446542  | 1,60E-11  | 1,00E+00 | 1,00E+00 | Pcdha9        | 1,00 | No  |
| ENSMUSG00000103771 | -7,30E-02 | -0,726297361 | 3,72E-02  | 8,47E-01 | 9,87E-01 | Gm36934       | 0,95 | No  |
| ENSMUSG00000103772 | 8,68E-01  | -2,22633612  | 1,16E+00  | 2,82E-01 | 5,78E-01 | Gm36933       | 1,83 | No  |
| ENSMUSG00000103774 | 9,01E-03  | -3,107646452 | -5,16E-10 | 1,00E+00 | 1,00E+00 | Gm36932       | 1,01 | No  |
| ENSMUSG00000103778 | -4,80E-02 | -2,89615251  | 1,06E-03  | 9,74E-01 | 1,00E+00 | Gm36930       | 0,97 | No  |
| ENSMUSG00000103779 | -1,12E+00 | -2,770633125 | 9,45E-01  | 3,31E-01 | 6,31E-01 | Gm36931       | 0,46 | No  |
| ENSMUSG00000103780 | -1,94E+00 | -3,107619243 | 1,50E+00  | 2,21E-01 | 5,50E-01 | Gm37524       | 0,26 | No  |
| ENSMUSG00000103783 | -8,39E-02 | -1,548260284 | 2,47E-02  | 8,75E-01 | 1,00E+00 | Gm37522       | 0,94 | No  |
| ENSMUSG00000103784 | -1,94E+00 | -3,107619243 | 1,50E+00  | 2,21E-01 | 5,50E-01 | Gm37526       | 0,26 | No  |



|                    |           |              |           |          |          |               |      |    |
|--------------------|-----------|--------------|-----------|----------|----------|---------------|------|----|
| ENSMUSG00000103785 | -5,59E-01 | -0,912692094 | 1,80E+00  | 1,79E-01 | 5,40E-01 | Gm35025       | 0,68 | No |
| ENSMUSG00000103791 | 1,87E+00  | -3,107639691 | 1,38E+00  | 2,40E-01 | 5,50E-01 | Gm38095       | 3,67 | No |
| ENSMUSG00000103793 | -3,15E-01 | -2,00859593  | 1,92E-01  | 6,61E-01 | 8,82E-01 | Pcdhga6       | 0,80 | No |
| ENSMUSG00000103800 | -1,93E+00 | -3,097026438 | 1,49E+00  | 2,23E-01 | 5,50E-01 | Pcdha8        | 0,26 | No |
| ENSMUSG00000103801 | -4,12E-02 | 1,062026482  | 4,09E-02  | 8,40E-01 | 9,83E-01 | Spin3-ps      | 0,97 | No |
| ENSMUSG00000103804 | 3,35E-01  | -0,600846175 | 7,53E-01  | 3,86E-01 | 6,87E-01 | Gm37062       | 1,26 | No |
| ENSMUSG00000103805 | 1,81E+00  | -3,10765737  | 1,28E+00  | 2,58E-01 | 5,50E-01 | Gm37063       | 3,49 | No |
| ENSMUSG00000103808 | -1,85E+00 | -2,831934433 | 1,40E+00  | 2,37E-01 | 5,50E-01 | Gm37060       | 0,28 | No |
| ENSMUSG00000103811 | 1,87E+00  | -3,107639691 | 1,38E+00  | 2,40E-01 | 5,50E-01 | Gm38004       | 3,67 | No |
| ENSMUSG00000103818 | 4,39E-01  | -2,497595409 | 1,51E-01  | 6,98E-01 | 9,04E-01 | Gm38009       | 1,36 | No |
| ENSMUSG00000103821 | -5,47E-03 | 1,019299944  | 7,21E-04  | 9,79E-01 | 1,00E+00 | D430013B06Rik | 1,00 | No |
| ENSMUSG00000103822 | 1,38E-01  | -2,185708088 | 3,29E-02  | 8,56E-01 | 9,93E-01 | 6030460B20Rik | 1,10 | No |
| ENSMUSG00000103823 | -3,42E-02 | 0,615103897  | 2,09E-02  | 8,85E-01 | 1,00E+00 | Gm7899        | 0,98 | No |
| ENSMUSG00000103827 | -6,39E-02 | -2,963280242 | 1,86E-03  | 9,66E-01 | 1,00E+00 | Gm32950       | 0,96 | No |
| ENSMUSG00000103828 | -8,41E-01 | -2,896156011 | 3,88E-01  | 5,33E-01 | 8,06E-01 | 2610001A08Rik | 0,56 | No |
| ENSMUSG00000103831 | 3,18E-01  | 1,880431235  | 4,25E+00  | 3,93E-02 | 2,35E-01 | Gm37608       | 1,25 | No |
| ENSMUSG00000103835 | -1,20E+00 | -2,311169148 | 1,86E+00  | 1,73E-01 | 5,29E-01 | Gm37612       | 0,44 | No |
| ENSMUSG00000103837 | 2,22E-01  | -2,548228068 | 6,19E-02  | 8,04E-01 | 9,62E-01 | Gm37614       | 1,17 | No |
| ENSMUSG00000103839 | 2,78E-01  | -0,740950632 | 5,47E-01  | 4,60E-01 | 7,49E-01 | Gm37607       | 1,21 | No |
| ENSMUSG00000103843 | -4,98E-03 | -1,847747564 | 6,25E-05  | 9,94E-01 | 1,00E+00 | Gm31266       | 1,00 | No |
| ENSMUSG00000103844 | 1,85E+00  | -3,107657832 | 1,35E+00  | 2,46E-01 | 5,50E-01 | 4933436E23Rik | 3,61 | No |
| ENSMUSG00000103845 | 1,62E-01  | 1,838937291  | 1,07E+00  | 3,01E-01 | 5,97E-01 | Gm19026       | 1,12 | No |
| ENSMUSG00000103846 | -1,36E+00 | -2,655116726 | 1,15E+00  | 2,83E-01 | 5,80E-01 | Gm37809       | 0,39 | No |
| ENSMUSG00000103847 | -1,88E-01 | 5,47400846   | 7,37E+00  | 6,62E-03 | 6,89E-02 | Gm20056       | 0,88 | No |
| ENSMUSG00000103848 | -3,87E+00 | -2,831956308 | 7,19E+00  | 7,32E-03 | 7,42E-02 | Gm17934       | 0,07 | No |
| ENSMUSG00000103851 | 3,14E-02  | -3,107617333 | -7,69E-10 | 1,00E+00 | 1,00E+00 | Gm37606       | 1,02 | No |
| ENSMUSG00000103852 | -3,88E-03 | -3,03362684  | 4,02E-12  | 1,00E+00 | 1,00E+00 | Gm18658       | 1,00 | No |
| ENSMUSG00000103854 | 2,62E+00  | -2,832040022 | 2,66E+00  | 1,03E-01 | 3,95E-01 | Gm37250       | 6,14 | No |
| ENSMUSG00000103856 | 9,01E-03  | -3,107646452 | -5,16E-10 | 1,00E+00 | 1,00E+00 | Gm2474        | 1,01 | No |
| ENSMUSG00000103857 | 3,48E-01  | 0,461060902  | 1,97E+00  | 1,61E-01 | 5,09E-01 | Gm37249       | 1,27 | No |
| ENSMUSG00000103864 | 2,17E-02  | 0,121555649  | 6,28E-03  | 9,37E-01 | 1,00E+00 | Gm37415       | 1,02 | No |
| ENSMUSG00000103865 | 2,15E-03  | 1,095525265  | 1,19E-04  | 9,91E-01 | 1,00E+00 | Gm37416       | 1,00 | No |

|                    |           |              |           |          |          |               |      |     |
|--------------------|-----------|--------------|-----------|----------|----------|---------------|------|-----|
| ENSMUSG00000103867 | 4,72E-01  | -1,863753402 | 3,03E-01  | 5,82E-01 | 8,38E-01 | 9630010A21Rik | 1,39 | No  |
| ENSMUSG00000103869 | -1,16E+00 | -0,497266348 | 9,72E+00  | 1,82E-03 | 2,60E-02 | Gm37420       | 0,45 | Yes |
| ENSMUSG00000103876 | -4,98E-02 | -2,711753409 | 2,21E-03  | 9,63E-01 | 1,00E+00 | Gm17806       | 0,97 | No  |
| ENSMUSG00000103877 | 7,55E-02  | -1,683194889 | 1,39E-02  | 9,06E-01 | 1,00E+00 | Gm21358       | 1,05 | No  |
| ENSMUSG00000103878 | 2,65E+00  | -2,963270355 | 2,72E+00  | 9,93E-02 | 3,92E-01 | Gm8197        | 6,29 | No  |
| ENSMUSG00000103880 | 2,76E-03  | -0,41276753  | 6,57E-05  | 9,94E-01 | 1,00E+00 | Gm37009       | 1,00 | No  |
| ENSMUSG00000103883 | 1,49E-01  | 1,148535139  | 5,74E-01  | 4,49E-01 | 7,39E-01 | Gm37010       | 1,11 | No  |
| ENSMUSG00000103885 | -1,90E+00 | -3,033594154 | 1,44E+00  | 2,30E-01 | 5,50E-01 | Gm37006       | 0,27 | No  |
| ENSMUSG00000103887 | -7,59E-02 | -2,655125226 | 5,27E-03  | 9,42E-01 | 1,00E+00 | Gm37008       | 0,95 | No  |
| ENSMUSG00000103891 | -2,68E+00 | -3,033645766 | 2,84E+00  | 9,17E-02 | 3,82E-01 | Gm37941       | 0,16 | No  |
| ENSMUSG00000103895 | -3,83E-02 | -3,107651936 | -7,91E-11 | 1,00E+00 | 1,00E+00 | Gm37942       | 0,97 | No  |
| ENSMUSG00000103897 | -1,24E-01 | -1,973593236 | 3,19E-02  | 8,58E-01 | 9,94E-01 | Pcdhga8       | 0,92 | No  |
| ENSMUSG00000103898 | -1,00E+00 | -0,863600232 | 4,83E+00  | 2,80E-02 | 1,89E-01 | Gm30238       | 0,50 | No  |
| ENSMUSG00000103899 | -4,97E-01 | -1,311065455 | 9,99E-01  | 3,17E-01 | 6,18E-01 | Gm37940       | 0,71 | No  |
| ENSMUSG00000103900 | -6,56E-02 | 0,675130244  | 8,14E-02  | 7,75E-01 | 9,45E-01 | Gm37500       | 0,96 | No  |
| ENSMUSG00000103901 | -4,45E-01 | -1,015666414 | 1,10E+00  | 2,94E-01 | 5,89E-01 | Gm37499       | 0,73 | No  |
| ENSMUSG00000103904 | -1,89E+00 | -3,1076441   | 1,42E+00  | 2,33E-01 | 5,50E-01 | Gm37497       | 0,27 | No  |
| ENSMUSG00000103905 | -9,89E-02 | 0,019396596  | 1,18E-01  | 7,31E-01 | 9,22E-01 | Gm34379       | 0,93 | No  |
| ENSMUSG00000103906 | 5,08E-01  | 0,280850161  | 3,67E+00  | 5,53E-02 | 2,88E-01 | Tigd5         | 1,42 | No  |
| ENSMUSG00000103907 | 2,39E-01  | 0,768646284  | 9,66E-01  | 3,26E-01 | 6,26E-01 | Gm37498       | 1,18 | No  |
| ENSMUSG00000103908 | 6,07E-01  | -2,548289815 | 4,11E-01  | 5,22E-01 | 8,00E-01 | Gm37502       | 1,52 | No  |
| ENSMUSG00000103911 | -6,20E-02 | -2,832001932 | 1,69E-03  | 9,67E-01 | 1,00E+00 | Gm38074       | 0,96 | No  |
| ENSMUSG00000103912 | 9,01E-03  | -3,107646452 | -5,16E-10 | 1,00E+00 | 1,00E+00 | Gm33819       | 1,01 | No  |
| ENSMUSG00000103921 | 7,36E-02  | 4,524089339  | 8,32E-01  | 3,62E-01 | 6,63E-01 | Gm5841        | 1,05 | No  |
| ENSMUSG00000103922 | -1,15E-01 | 5,076826973  | 2,46E+00  | 1,17E-01 | 4,23E-01 | Gm6123        | 0,92 | No  |
| ENSMUSG00000103925 | -8,62E-01 | -2,89616149  | 4,08E-01  | 5,23E-01 | 8,01E-01 | B230112G18Rik | 0,55 | No  |
| ENSMUSG00000103926 | -2,68E+00 | -3,033645766 | 2,84E+00  | 9,17E-02 | 3,82E-01 | Gm37894       | 0,16 | No  |
| ENSMUSG00000103928 | 3,86E-02  | 1,467593398  | 5,22E-02  | 8,19E-01 | 9,71E-01 | Gm37893       | 1,03 | No  |
| ENSMUSG00000103930 | 7,59E-01  | -2,770592647 | 3,13E-01  | 5,76E-01 | 8,34E-01 | Gm36961       | 1,69 | No  |
| ENSMUSG00000103933 | -1,09E+00 | -2,548159636 | 1,10E+00  | 2,95E-01 | 5,91E-01 | Gm36964       | 0,47 | No  |
| ENSMUSG00000103937 | -1,45E+00 | -2,107585436 | 3,77E+00  | 5,23E-02 | 2,78E-01 | Gm37186       | 0,37 | No  |
| ENSMUSG00000103940 | 8,54E-01  | -2,311094415 | 8,78E-01  | 3,49E-01 | 6,50E-01 | Gm38227       | 1,81 | No  |

|                    |           |              |           |          |          |               |      |     |
|--------------------|-----------|--------------|-----------|----------|----------|---------------|------|-----|
| ENSMUSG00000103945 | -6,10E-01 | 1,233233209  | 1,09E+01  | 9,84E-04 | 1,60E-02 | Gm38228       | 0,66 | Yes |
| ENSMUSG00000103948 | 2,43E-02  | 2,070674798  | 2,72E-02  | 8,69E-01 | 1,00E+00 | 4930594C11Rik | 1,02 | No  |
| ENSMUSG00000103949 | -1,22E+00 | -2,655117075 | 1,41E+00  | 2,34E-01 | 5,50E-01 | Gm38226       | 0,43 | No  |
| ENSMUSG00000103952 | -9,52E-01 | -2,77061615  | 7,95E-01  | 3,73E-01 | 6,74E-01 | Gm37268       | 0,52 | No  |
| ENSMUSG00000103953 | -1,55E-02 | 2,898360485  | 1,77E-02  | 8,94E-01 | 1,00E+00 | Gm29718       | 0,99 | No  |
| ENSMUSG00000103955 | 8,46E-02  | 1,580626222  | 2,55E-01  | 6,14E-01 | 8,53E-01 | Gm37270       | 1,06 | No  |
| ENSMUSG00000103956 | -3,35E-01 | -2,77058409  | 8,20E-02  | 7,75E-01 | 9,45E-01 | Gm37118       | 0,79 | No  |
| ENSMUSG00000103957 | -2,44E+00 | -2,088697184 | 8,33E+00  | 3,89E-03 | 4,64E-02 | Gm10766       | 0,18 | Yes |
| ENSMUSG00000103958 | -2,66E+00 | -3,033639428 | 2,81E+00  | 9,35E-02 | 3,83E-01 | Gm8023        | 0,16 | No  |
| ENSMUSG00000103964 | -8,19E-01 | -2,355586335 | 9,78E-01  | 3,23E-01 | 6,23E-01 | Gm8407        | 0,57 | No  |
| ENSMUSG00000103966 | 7,42E-01  | 0,814128068  | 9,85E+00  | 1,70E-03 | 2,46E-02 | Gm37120       | 1,67 | Yes |
| ENSMUSG00000103967 | -7,38E-01 | -1,800912007 | 1,42E+00  | 2,33E-01 | 5,50E-01 | Gm38214       | 0,60 | No  |
| ENSMUSG00000103970 | -2,29E-01 | 0,791843519  | 1,07E+00  | 3,01E-01 | 5,98E-01 | Gm37678       | 0,85 | No  |
| ENSMUSG00000103972 | 3,14E-02  | -3,107617333 | -7,69E-10 | 1,00E+00 | 1,00E+00 | Gm37466       | 1,02 | No  |
| ENSMUSG00000103973 | -2,61E-01 | -0,91259269  | 3,74E-01  | 5,41E-01 | 8,11E-01 | BC055308      | 0,83 | No  |
| ENSMUSG00000103975 | 8,99E-02  | 2,779587471  | 5,63E-01  | 4,53E-01 | 7,43E-01 | Gm37676       | 1,06 | No  |
| ENSMUSG00000103976 | -1,08E-01 | -0,278715391 | 9,93E-02  | 7,53E-01 | 9,33E-01 | Gm37677       | 0,93 | No  |
| ENSMUSG00000103979 | -1,36E-01 | -0,83189636  | 1,15E-01  | 7,35E-01 | 9,24E-01 | Gm20305       | 0,91 | No  |
| ENSMUSG00000103981 | -3,63E-01 | -0,627428903 | 9,19E-01  | 3,38E-01 | 6,38E-01 | Gm37449       | 0,78 | No  |
| ENSMUSG00000103983 | -3,48E-01 | -1,711672441 | 3,09E-01  | 5,78E-01 | 8,36E-01 | Gm20045       | 0,79 | No  |
| ENSMUSG00000103984 | 4,56E-01  | -0,81635438  | 1,21E+00  | 2,71E-01 | 5,67E-01 | Gm37447       | 1,37 | No  |
| ENSMUSG00000103986 | -2,44E-01 | 3,753265391  | 6,87E+00  | 8,78E-03 | 8,49E-02 | Gm5539        | 0,84 | No  |
| ENSMUSG00000103995 | -1,23E+00 | -3,146117124 | 7,12E-01  | 3,99E-01 | 6,98E-01 | 5730488B01Rik | 0,42 | No  |
| ENSMUSG00000103996 | -1,32E+00 | -2,832003068 | 1,09E+00  | 2,95E-01 | 5,91E-01 | 4833421G17Rik | 0,40 | No  |
| ENSMUSG00000103998 | -2,99E-01 | -1,311076654 | 4,07E-01  | 5,23E-01 | 8,01E-01 | Gm38025       | 0,81 | No  |
| ENSMUSG00000103999 | 1,85E+00  | -3,107657832 | 1,35E+00  | 2,46E-01 | 5,50E-01 | Gm38026       | 3,61 | No  |
| ENSMUSG00000104000 | -4,26E-02 | 0,33088639   | 2,71E-02  | 8,69E-01 | 1,00E+00 | Gm38335       | 0,97 | No  |
| ENSMUSG00000104002 | -1,32E-01 | 0,580824284  | 2,99E-01  | 5,85E-01 | 8,38E-01 | Gm38336       | 0,91 | No  |
| ENSMUSG00000104010 | 2,04E-01  | -1,896116022 | 1,16E-01  | 7,33E-01 | 9,23E-01 | Gm37366       | 1,15 | No  |
| ENSMUSG00000104012 | 4,72E-01  | -2,497473287 | 1,73E-01  | 6,77E-01 | 8,92E-01 | Gm37364       | 1,39 | No  |
| ENSMUSG00000104016 | -3,35E-01 | -0,355353808 | 1,03E+00  | 3,11E-01 | 6,11E-01 | Gm37362       | 0,79 | No  |
| ENSMUSG00000104018 | 3,11E-01  | -1,070194192 | 5,15E-01  | 4,73E-01 | 7,61E-01 | 4833412K13Rik | 1,24 | No  |

|                    |           |              |           |          |          |               |      |     |
|--------------------|-----------|--------------|-----------|----------|----------|---------------|------|-----|
| ENSMUSG00000104020 | -5,47E-01 | -2,070165385 | 6,53E-01  | 4,19E-01 | 7,14E-01 | Gm37215       | 0,68 | No  |
| ENSMUSG00000104022 | -2,71E+00 | -2,963235336 | 2,92E+00  | 8,75E-02 | 3,78E-01 | Gm37214       | 0,15 | No  |
| ENSMUSG00000104025 | 1,28E-01  | -1,436726877 | 5,73E-02  | 8,11E-01 | 9,66E-01 | E330040D14Rik | 1,09 | No  |
| ENSMUSG00000104026 | -1,16E+00 | -1,863746289 | 2,64E+00  | 1,04E-01 | 3,97E-01 | Gm37212       | 0,45 | No  |
| ENSMUSG00000104028 | -2,39E-02 | 2,285487404  | 3,01E-02  | 8,62E-01 | 9,97E-01 | Gm5851        | 0,98 | No  |
| ENSMUSG00000104030 | -1,01E+00 | -1,770534572 | 2,59E+00  | 1,08E-01 | 4,02E-01 | 5330406M23Rik | 0,50 | No  |
| ENSMUSG00000104031 | 1,55E+00  | -2,033692266 | 4,56E+00  | 3,28E-02 | 2,12E-01 | Gm17771       | 2,92 | No  |
| ENSMUSG00000104034 | -1,94E+00 | -3,107619243 | 1,50E+00  | 2,21E-01 | 5,50E-01 | 2900092N22Rik | 0,26 | No  |
| ENSMUSG00000104037 | 3,45E-01  | -2,107652844 | 2,19E-01  | 6,40E-01 | 8,70E-01 | Gm37776       | 1,27 | No  |
| ENSMUSG00000104039 | 2,62E+00  | -2,600656568 | 2,67E+00  | 1,02E-01 | 3,95E-01 | Gm37772       | 6,17 | No  |
| ENSMUSG00000104040 | -3,22E-01 | -0,963075692 | 5,80E-01  | 4,46E-01 | 7,37E-01 | Gm37563       | 0,80 | No  |
| ENSMUSG00000104043 | -9,52E-01 | -2,655128299 | 7,95E-01  | 3,73E-01 | 6,74E-01 | Gm6525        | 0,52 | No  |
| ENSMUSG00000104044 | -1,36E+00 | -2,401369699 | 1,16E+00  | 2,81E-01 | 5,78E-01 | Gm37566       | 0,39 | No  |
| ENSMUSG00000104052 | 1,85E+00  | -2,963264462 | 1,34E+00  | 2,48E-01 | 5,50E-01 | Gm38125       | 3,59 | No  |
| ENSMUSG00000104053 | -1,72E+00 | -1,247009409 | 1,07E+01  | 1,08E-03 | 1,72E-02 | Gm38126       | 0,30 | Yes |
| ENSMUSG00000104056 | -6,65E-02 | -2,311160812 | 4,01E-03  | 9,50E-01 | 1,00E+00 | Gm38129       | 0,95 | No  |
| ENSMUSG00000104057 | -5,14E-02 | -1,963219809 | 4,93E-03  | 9,44E-01 | 1,00E+00 | Gm38130       | 0,97 | No  |
| ENSMUSG00000104058 | -3,63E-01 | 2,758483212  | 9,04E+00  | 2,64E-03 | 3,47E-02 | Etv3l         | 0,78 | Yes |
| ENSMUSG00000104060 | -1,38E+00 | -1,831996259 | 4,03E+00  | 4,47E-02 | 2,52E-01 | Gm37954       | 0,38 | No  |
| ENSMUSG00000104061 | 1,60E+00  | -2,655184964 | 1,75E+00  | 1,86E-01 | 5,50E-01 | Gm37953       | 3,03 | No  |
| ENSMUSG00000104063 | -4,76E-01 | -1,973579583 | 4,64E-01  | 4,96E-01 | 7,81E-01 | Pcdhgb7       | 0,72 | No  |
| ENSMUSG00000104065 | -4,94E-02 | 1,028251544  | 5,85E-02  | 8,09E-01 | 9,65E-01 | Gm37197       | 0,97 | No  |
| ENSMUSG00000104066 | -3,83E-02 | -3,107651936 | -7,91E-11 | 1,00E+00 | 1,00E+00 | Gm37955       | 0,97 | No  |
| ENSMUSG00000104068 | 2,15E-01  | 1,910020731  | 1,94E+00  | 1,64E-01 | 5,15E-01 | Gm37199       | 1,16 | No  |
| ENSMUSG00000104069 | -8,92E-02 | -2,832016339 | 5,49E-03  | 9,41E-01 | 1,00E+00 | Gm37198       | 0,94 | No  |
| ENSMUSG00000104074 | -6,86E-02 | -2,497670337 | 6,50E-03  | 9,36E-01 | 1,00E+00 | Gm37025       | 0,95 | No  |
| ENSMUSG00000104075 | -1,87E+00 | -3,107637761 | 1,39E+00  | 2,38E-01 | 5,50E-01 | 5430433H01Rik | 0,27 | No  |
| ENSMUSG00000104077 | -1,22E+00 | -2,655115463 | 1,42E+00  | 2,34E-01 | 5,50E-01 | Gm37027       | 0,43 | No  |
| ENSMUSG00000104078 | -5,38E-02 | -2,548267569 | 2,65E-03  | 9,59E-01 | 1,00E+00 | Gm37023       | 0,96 | No  |
| ENSMUSG00000104080 | 6,96E-01  | -2,89613858  | 2,63E-01  | 6,08E-01 | 8,51E-01 | Gm38279       | 1,62 | No  |
| ENSMUSG00000104082 | 1,87E-02  | 0,0537602    | 3,99E-03  | 9,50E-01 | 1,00E+00 | Gm7115        | 1,01 | No  |
| ENSMUSG00000104083 | -4,48E-01 | -2,355602278 | 2,05E-01  | 6,51E-01 | 8,76E-01 | Gm29739       | 0,73 | No  |

|                    |           |              |          |          |          |               |      |    |
|--------------------|-----------|--------------|----------|----------|----------|---------------|------|----|
| ENSMUSG00000104084 | -1,87E+00 | -3,033619006 | 1,41E+00 | 2,36E-01 | 5,50E-01 | Gm38276       | 0,27 | No |
| ENSMUSG00000104086 | -1,89E+00 | -3,1076441   | 1,42E+00 | 2,33E-01 | 5,50E-01 | 1700039M15Rik | 0,27 | No |
| ENSMUSG00000104088 | -2,43E-01 | -1,963196719 | 1,30E-01 | 7,19E-01 | 9,15E-01 | Gm38275       | 0,85 | No |
| ENSMUSG00000104092 | -7,39E-01 | -2,497587072 | 6,11E-01 | 4,34E-01 | 7,27E-01 | A930014E01Rik | 0,60 | No |
| ENSMUSG00000104093 | -1,55E+00 | -2,574156838 | 1,58E+00 | 2,09E-01 | 5,50E-01 | A330015K06Rik | 0,34 | No |
| ENSMUSG00000104094 | -4,10E-01 | -0,946160553 | 1,05E+00 | 3,04E-01 | 6,01E-01 | Gm37314       | 0,75 | No |
| ENSMUSG00000104097 | 2,78E-01  | -1,033613302 | 3,04E-01 | 5,81E-01 | 8,38E-01 | Gm37313       | 1,21 | No |
| ENSMUSG00000104101 | 1,33E-01  | -0,454661183 | 1,49E-01 | 7,00E-01 | 9,04E-01 | Gm37881       | 1,10 | No |
| ENSMUSG00000104103 | -6,06E-02 | 2,639275542  | 2,37E-01 | 6,26E-01 | 8,60E-01 | Gm9517        | 0,96 | No |
| ENSMUSG00000104107 | -7,16E-01 | -1,83201889  | 8,71E-01 | 3,51E-01 | 6,52E-01 | Gm37879       | 0,61 | No |
| ENSMUSG00000104108 | -5,86E-01 | -0,896064142 | 2,09E+00 | 1,48E-01 | 4,87E-01 | Gm37876       | 0,67 | No |
| ENSMUSG00000104113 | -2,30E-01 | -1,929378385 | 1,29E-01 | 7,20E-01 | 9,15E-01 | Gm37292       | 0,85 | No |
| ENSMUSG00000104114 | -1,37E+00 | -2,896128821 | 1,18E+00 | 2,77E-01 | 5,74E-01 | Gm37297       | 0,39 | No |
| ENSMUSG00000104116 | -1,21E+00 | -1,692800427 | 3,75E+00 | 5,28E-02 | 2,80E-01 | Gm37296       | 0,43 | No |
| ENSMUSG00000104118 | 1,67E-01  | -0,497793247 | 1,97E-01 | 6,57E-01 | 8,80E-01 | Gm37298       | 1,12 | No |
| ENSMUSG00000104121 | 1,23E+00  | -2,548254542 | 9,38E-01 | 3,33E-01 | 6,33E-01 | Gm37485       | 2,35 | No |
| ENSMUSG00000104122 | -1,06E-01 | -3,033634182 | 5,86E-03 | 9,39E-01 | 1,00E+00 | Gm37482       | 0,93 | No |
| ENSMUSG00000104125 | 4,34E-01  | 0,882588613  | 4,06E+00 | 4,39E-02 | 2,49E-01 | Gm37488       | 1,35 | No |
| ENSMUSG00000104126 | -1,42E-02 | 6,439635605  | 5,06E-02 | 8,22E-01 | 9,72E-01 | Gm37486       | 0,99 | No |
| ENSMUSG00000104135 | -1,87E+00 | -3,107637761 | 1,39E+00 | 2,38E-01 | 5,50E-01 | Gm36953       | 0,27 | No |
| ENSMUSG00000104136 | 7,49E-01  | -1,801133186 | 1,19E+00 | 2,76E-01 | 5,73E-01 | Gm36955       | 1,68 | No |
| ENSMUSG00000104140 | -6,09E-01 | -2,146146898 | 5,05E-01 | 4,77E-01 | 7,65E-01 | Gm37140       | 0,66 | No |
| ENSMUSG00000104141 | 4,17E-02  | 3,749795497  | 2,00E-01 | 6,55E-01 | 8,79E-01 | Gm6140        | 1,03 | No |
| ENSMUSG00000104145 | -5,08E-01 | -2,070146488 | 4,13E-01 | 5,20E-01 | 7,99E-01 | D130019J16Rik | 0,70 | No |
| ENSMUSG00000104148 | 4,82E-03  | -3,17446542  | 1,60E-11 | 1,00E+00 | 1,00E+00 | Pcdha2        | 1,00 | No |
| ENSMUSG00000104150 | -2,69E-01 | -1,669002656 | 1,90E-01 | 6,63E-01 | 8,83E-01 | Gm44573       | 0,83 | No |
| ENSMUSG00000104154 | 9,23E-02  | -0,146297641 | 9,97E-02 | 7,52E-01 | 9,32E-01 | Gm38104       | 1,07 | No |
| ENSMUSG00000104156 | -3,12E-01 | 2,966908228  | 7,43E+00 | 6,40E-03 | 6,73E-02 | Gm38102       | 0,81 | No |
| ENSMUSG00000104159 | 3,62E-01  | -1,740846278 | 4,24E-01 | 5,15E-01 | 7,96E-01 | Gm38099       | 1,29 | No |
| ENSMUSG00000104161 | 2,88E-01  | -2,929318164 | 5,13E-02 | 8,21E-01 | 9,72E-01 | Gm20089       | 1,22 | No |
| ENSMUSG00000104164 | 2,65E-01  | 3,583739982  | 7,24E+00 | 7,12E-03 | 7,27E-02 | Gm38248       | 1,20 | No |
| ENSMUSG00000104166 | 6,18E-01  | -2,57422068  | 4,26E-01 | 5,14E-01 | 7,96E-01 | Gm38247       | 1,53 | No |

|                    |           |              |          |          |          |               |      |    |
|--------------------|-----------|--------------|----------|----------|----------|---------------|------|----|
| ENSMUSG00000104167 | 1,87E+00  | -3,03364371  | 1,36E+00 | 2,43E-01 | 5,50E-01 | A030012G06Rik | 3,66 | No |
| ENSMUSG00000104168 | -2,29E-01 | -1,236722964 | 2,46E-01 | 6,20E-01 | 8,57E-01 | Gm38250       | 0,85 | No |
| ENSMUSG00000104170 | -6,97E-02 | -2,401407795 | 6,73E-03 | 9,35E-01 | 1,00E+00 | Gm37702       | 0,95 | No |
| ENSMUSG00000104174 | -1,92E+00 | -3,033623267 | 1,46E+00 | 2,27E-01 | 5,50E-01 | Gm37701       | 0,26 | No |
| ENSMUSG00000104181 | -6,75E-01 | -0,267912981 | 3,79E+00 | 5,16E-02 | 2,77E-01 | Gm8850        | 0,63 | No |
| ENSMUSG00000104183 | -1,87E+00 | -3,107637761 | 1,39E+00 | 2,38E-01 | 5,50E-01 | 1700054019Rik | 0,27 | No |
| ENSMUSG00000104184 | 1,87E-01  | -0,74085111  | 2,35E-01 | 6,28E-01 | 8,61E-01 | Gm37818       | 1,14 | No |
| ENSMUSG00000104187 | -2,02E+00 | -2,600655824 | 3,08E+00 | 7,95E-02 | 3,61E-01 | Gm37820       | 0,25 | No |
| ENSMUSG00000104189 | 1,20E+00  | -3,146123991 | 6,74E-01 | 4,12E-01 | 7,07E-01 | Gm37822       | 2,30 | No |
| ENSMUSG00000104190 | 1,24E+00  | -2,655054889 | 9,60E-01 | 3,27E-01 | 6,28E-01 | Gm10472       | 2,37 | No |
| ENSMUSG00000104195 | 6,23E-01  | 0,019289814  | 4,19E+00 | 4,06E-02 | 2,39E-01 | B230377A18Rik | 1,54 | No |
| ENSMUSG00000104197 | -1,89E+00 | -3,033648118 | 1,42E+00 | 2,33E-01 | 5,50E-01 | Gm37632       | 0,27 | No |
| ENSMUSG00000104200 | -9,79E-01 | -2,401319296 | 1,16E+00 | 2,81E-01 | 5,78E-01 | Gm37399       | 0,51 | No |
| ENSMUSG00000104202 | -7,73E-01 | -1,311131383 | 2,11E+00 | 1,46E-01 | 4,85E-01 | Gm8101        | 0,59 | No |
| ENSMUSG00000104204 | -1,26E-01 | -0,267998116 | 1,51E-01 | 6,98E-01 | 9,04E-01 | Gm37397       | 0,92 | No |
| ENSMUSG00000104206 | 6,38E-01  | -2,800988404 | 3,36E-01 | 5,62E-01 | 8,25E-01 | Gm32250       | 1,56 | No |
| ENSMUSG00000104208 | -1,49E-02 | 5,969610545  | 5,14E-02 | 8,21E-01 | 9,72E-01 | Gm37401       | 0,99 | No |
| ENSMUSG00000104210 | 7,16E-01  | -2,711716827 | 2,80E-01 | 5,97E-01 | 8,45E-01 | Gm37984       | 1,64 | No |
| ENSMUSG00000104212 | 1,09E+00  | -2,49762116  | 1,53E+00 | 2,17E-01 | 5,50E-01 | Gm37986       | 2,13 | No |
| ENSMUSG00000104213 | -6,49E-02 | -2,185622645 | 6,81E-03 | 9,34E-01 | 1,00E+00 | Ighd          | 0,96 | No |
| ENSMUSG00000104214 | 1,08E-01  | 1,661178105  | 4,43E-01 | 5,06E-01 | 7,90E-01 | Gm36638       | 1,08 | No |
| ENSMUSG00000104217 | -1,62E-01 | 2,710801873  | 1,75E+00 | 1,86E-01 | 5,50E-01 | Gm37988       | 0,89 | No |
| ENSMUSG00000104218 | 1,81E-01  | 3,036887072  | 2,61E+00 | 1,06E-01 | 3,99E-01 | Gm9134        | 1,13 | No |
| ENSMUSG00000104222 | 1,76E-01  | 4,640387457  | 5,02E+00 | 2,51E-02 | 1,75E-01 | Gm7292        | 1,13 | No |
| ENSMUSG00000104224 | -2,63E-02 | -3,033653157 | 2,33E-04 | 9,88E-01 | 1,00E+00 | Gm37693       | 0,98 | No |
| ENSMUSG00000104226 | 4,98E-02  | 0,763780846  | 4,71E-02 | 8,28E-01 | 9,76E-01 | Gm7470        | 1,04 | No |
| ENSMUSG00000104231 | -2,51E-01 | 0,116085253  | 7,32E-01 | 3,92E-01 | 6,92E-01 | Gm37592       | 0,84 | No |
| ENSMUSG00000104235 | -2,88E-01 | 0,93035831   | 1,69E+00 | 1,93E-01 | 5,50E-01 | Gm37589       | 0,82 | No |
| ENSMUSG00000104237 | -6,79E-01 | -3,070168314 | 1,83E-01 | 6,69E-01 | 8,87E-01 | Gm33533       | 0,62 | No |
| ENSMUSG00000104239 | -4,38E-01 | -2,401372328 | 1,96E-01 | 6,58E-01 | 8,81E-01 | Gm37588       | 0,74 | No |
| ENSMUSG00000104241 | -1,26E+00 | -2,548220405 | 1,52E+00 | 2,18E-01 | 5,50E-01 | Gm9442        | 0,42 | No |
| ENSMUSG00000104244 | 2,22E-01  | -1,522778221 | 1,78E-01 | 6,73E-01 | 8,90E-01 | 2900018N21Rik | 1,17 | No |

|                    |           |              |          |          |          |               |      |     |
|--------------------|-----------|--------------|----------|----------|----------|---------------|------|-----|
| ENSMUSG00000104245 | -2,16E-01 | 1,348461498  | 1,26E+00 | 2,62E-01 | 5,56E-01 | Gm38155       | 0,86 | No  |
| ENSMUSG00000104252 | 4,82E-03  | -3,17446542  | 1,60E-11 | 1,00E+00 | 1,00E+00 | Pcdha4        | 1,00 | No  |
| ENSMUSG00000104253 | -1,48E+00 | -2,600693898 | 2,28E+00 | 1,31E-01 | 4,56E-01 | Gm37174       | 0,36 | No  |
| ENSMUSG00000104262 | -7,57E-01 | -2,401421298 | 6,42E-01 | 4,23E-01 | 7,18E-01 | Gm37747       | 0,59 | No  |
| ENSMUSG00000104263 | -3,19E+00 | -2,896141896 | 4,27E+00 | 3,87E-02 | 2,33E-01 | 9430062P05Rik | 0,11 | No  |
| ENSMUSG00000104265 | -5,05E-02 | 0,236778715  | 3,40E-02 | 8,54E-01 | 9,92E-01 | Gm8869        | 0,97 | No  |
| ENSMUSG00000104268 | -7,59E-01 | -2,497560594 | 6,46E-01 | 4,22E-01 | 7,17E-01 | Gm37750       | 0,59 | No  |
| ENSMUSG00000104271 | -9,96E-01 | -2,107565573 | 1,20E+00 | 2,73E-01 | 5,69E-01 | Gm37891       | 0,50 | No  |
| ENSMUSG00000104272 | 8,38E-01  | -2,355490322 | 6,10E-01 | 4,35E-01 | 7,28E-01 | Gm38297       | 1,79 | No  |
| ENSMUSG00000104273 | -1,49E+00 | -2,40127853  | 2,31E+00 | 1,29E-01 | 4,50E-01 | A530064N14Rik | 0,35 | No  |
| ENSMUSG00000104277 | -4,08E-01 | -1,205778781 | 6,98E-01 | 4,03E-01 | 7,01E-01 | Gm38299       | 0,75 | No  |
| ENSMUSG00000104279 | 2,44E-01  | -1,378348511 | 2,00E-01 | 6,55E-01 | 8,79E-01 | Gm38300       | 1,18 | No  |
| ENSMUSG00000104280 | -5,21E-01 | -0,535188005 | 2,06E+00 | 1,51E-01 | 4,93E-01 | Rps2-ps11     | 0,70 | No  |
| ENSMUSG00000104291 | -1,41E-01 | -0,401373914 | 1,66E-01 | 6,83E-01 | 8,95E-01 | A130071D04Rik | 0,91 | No  |
| ENSMUSG00000104292 | -1,35E+00 | -2,448692658 | 2,51E+00 | 1,13E-01 | 4,14E-01 | Gm38042       | 0,39 | No  |
| ENSMUSG00000104293 | -2,43E-01 | -0,015804069 | 6,06E-01 | 4,36E-01 | 7,29E-01 | Gm38043       | 0,85 | No  |
| ENSMUSG00000104295 | 1,15E-01  | -1,015685309 | 7,60E-02 | 7,83E-01 | 9,50E-01 | Gm6197        | 1,08 | No  |
| ENSMUSG00000104297 | 1,81E+00  | -3,10765737  | 1,28E+00 | 2,58E-01 | 5,50E-01 | Gm38046       | 3,49 | No  |
| ENSMUSG00000104298 | -2,73E-02 | -2,963256629 | 3,40E-04 | 9,85E-01 | 1,00E+00 | Gm38040       | 0,98 | No  |
| ENSMUSG00000104301 | -2,64E+00 | -2,963219259 | 2,78E+00 | 9,55E-02 | 3,86E-01 | Wdr49         | 0,16 | No  |
| ENSMUSG00000104302 | -1,02E+00 | 1,062818497  | 2,54E+01 | 4,60E-07 | 2,21E-05 | Gm36975       | 0,49 | Yes |
| ENSMUSG00000104303 | -5,54E-01 | -2,655102891 | 2,41E-01 | 6,23E-01 | 8,58E-01 | Gm36976       | 0,68 | No  |
| ENSMUSG00000104306 | -7,24E-02 | -1,165833141 | 2,82E-02 | 8,67E-01 | 9,99E-01 | Gm36972       | 0,95 | No  |
| ENSMUSG00000104309 | 7,38E-02  | 5,55470003   | 1,15E+00 | 2,83E-01 | 5,79E-01 | Gm5846        | 1,05 | No  |
| ENSMUSG00000104315 | -1,17E-01 | -0,627577668 | 1,00E-01 | 7,52E-01 | 9,32E-01 | Gm37906       | 0,92 | No  |
| ENSMUSG00000104316 | -1,79E-01 | -0,800841468 | 1,88E-01 | 6,65E-01 | 8,85E-01 | Gm37909       | 0,88 | No  |
| ENSMUSG00000104318 | 4,82E-03  | -3,17446542  | 1,60E-11 | 1,00E+00 | 1,00E+00 | Pcdha7        | 1,00 | No  |
| ENSMUSG00000104324 | -3,68E-01 | -2,54826105  | 1,71E-01 | 6,79E-01 | 8,93E-01 | Gm37320       | 0,77 | No  |
| ENSMUSG00000104325 | -1,72E+00 | -2,600711676 | 2,06E+00 | 1,51E-01 | 4,93E-01 | Gm37321       | 0,30 | No  |
| ENSMUSG00000104329 | 1,87E+00  | -3,107639691 | 1,38E+00 | 2,40E-01 | 5,50E-01 | Gm37324       | 3,67 | No  |
| ENSMUSG00000104331 | 1,87E+00  | -3,107639691 | 1,38E+00 | 2,40E-01 | 5,50E-01 | Gm38284       | 3,67 | No  |
| ENSMUSG00000104333 | 1,87E+00  | -3,107639691 | 1,38E+00 | 2,40E-01 | 5,50E-01 | Gm10253       | 3,67 | No  |

|                    |           |              |          |          |          |               |      |     |
|--------------------|-----------|--------------|----------|----------|----------|---------------|------|-----|
| ENSMUSG00000104339 | -2,05E+00 | -2,497486089 | 5,15E+00 | 2,32E-02 | 1,67E-01 | C130089K02Rik | 0,24 | No  |
| ENSMUSG00000104340 | 1,56E+00  | -1,770653808 | 4,64E+00 | 3,12E-02 | 2,04E-01 | Gm10522       | 2,95 | No  |
| ENSMUSG00000104341 | -1,89E+00 | -3,1076441   | 1,42E+00 | 2,33E-01 | 5,50E-01 | Gm37688       | 0,27 | No  |
| ENSMUSG00000104342 | 1,02E-01  | 0,58108836   | 1,76E-01 | 6,75E-01 | 8,91E-01 | Gm36401       | 1,07 | No  |
| ENSMUSG00000104344 | -1,94E-02 | 3,005027058  | 2,93E-02 | 8,64E-01 | 9,98E-01 | Gm38077       | 0,99 | No  |
| ENSMUSG00000104346 | -1,16E-01 | -1,841415377 | 3,10E-02 | 8,60E-01 | 9,95E-01 | Pcdhga3       | 0,92 | No  |
| ENSMUSG00000104347 | -1,65E-01 | 1,409151805  | 8,52E-01 | 3,56E-01 | 6,57E-01 | Gm37689       | 0,89 | No  |
| ENSMUSG00000104348 | -4,39E-03 | 2,128429818  | 9,64E-04 | 9,75E-01 | 1,00E+00 | Gm37691       | 1,00 | No  |
| ENSMUSG00000104350 | 2,70E-01  | 0,906568857  | 1,71E+00 | 1,91E-01 | 5,50E-01 | Gm38244       | 1,21 | No  |
| ENSMUSG00000104351 | -5,21E-01 | -0,205665028 | 2,71E+00 | 1,00E-01 | 3,92E-01 | Gm37125       | 0,70 | No  |
| ENSMUSG00000104354 | -2,96E-01 | -2,57423986  | 7,45E-02 | 7,85E-01 | 9,51E-01 | Gm37126       | 0,81 | No  |
| ENSMUSG00000104358 | 1,20E-01  | 1,42909295   | 4,40E-01 | 5,07E-01 | 7,91E-01 | Gm37127       | 1,09 | No  |
| ENSMUSG00000104360 | 6,09E-01  | 0,632839872  | 6,62E+00 | 1,01E-02 | 9,40E-02 | Gm8762        | 1,52 | No  |
| ENSMUSG00000104361 | 1,44E+00  | -2,146226233 | 3,81E+00 | 5,10E-02 | 2,75E-01 | Gm38080       | 2,71 | No  |
| ENSMUSG00000104364 | 1,23E-01  | 0,661551239  | 2,57E-01 | 6,12E-01 | 8,52E-01 | Gm38078       | 1,09 | No  |
| ENSMUSG00000104367 | 1,11E+00  | -2,600673317 | 1,18E+00 | 2,77E-01 | 5,74E-01 | Gm38079       | 2,16 | No  |
| ENSMUSG00000104368 | 3,69E-01  | -2,033591095 | 2,73E-01 | 6,01E-01 | 8,47E-01 | 2010103J01Rik | 1,29 | No  |
| ENSMUSG00000104369 | -7,78E-01 | -1,472801072 | 1,23E+00 | 2,67E-01 | 5,63E-01 | Gm38082       | 0,58 | No  |
| ENSMUSG00000104378 | -9,41E-01 | -2,497578921 | 7,75E-01 | 3,79E-01 | 6,79E-01 | Gm37510       | 0,52 | No  |
| ENSMUSG00000104379 | 4,21E-01  | -1,879870256 | 4,37E-01 | 5,09E-01 | 7,92E-01 | Gm37509       | 1,34 | No  |
| ENSMUSG00000104383 | -1,63E+00 | -1,088468917 | 1,25E+01 | 3,97E-04 | 7,57E-03 | Gm37553       | 0,32 | Yes |
| ENSMUSG00000104386 | -1,87E+00 | -3,107637761 | 1,39E+00 | 2,38E-01 | 5,50E-01 | Gm37030       | 0,27 | No  |
| ENSMUSG00000104388 | 2,43E-01  | -1,472914129 | 2,13E-01 | 6,45E-01 | 8,73E-01 | Gm37033       | 1,18 | No  |
| ENSMUSG00000104389 | -1,52E-01 | -1,024704429 | 1,05E-01 | 7,46E-01 | 9,29E-01 | Gm37034       | 0,90 | No  |
| ENSMUSG00000104391 | -1,43E-01 | -1,185290616 | 7,84E-02 | 7,80E-01 | 9,48E-01 | Gm37960       | 0,91 | No  |
| ENSMUSG00000104392 | 2,28E-01  | -1,832159948 | 1,20E-01 | 7,28E-01 | 9,20E-01 | Gm37962       | 1,17 | No  |
| ENSMUSG00000104394 | -2,25E-01 | 2,004514927  | 2,33E+00 | 1,27E-01 | 4,46E-01 | Gm37254       | 0,86 | No  |
| ENSMUSG00000104396 | 7,16E-01  | -2,896122129 | 2,78E-01 | 5,98E-01 | 8,45E-01 | Gm37959       | 1,64 | No  |
| ENSMUSG00000104399 | 2,16E-01  | 1,306207411  | 1,32E+00 | 2,51E-01 | 5,50E-01 | Gm37963       | 1,16 | No  |
| ENSMUSG00000104400 | 1,79E+00  | -2,832057733 | 1,29E+00 | 2,55E-01 | 5,50E-01 | Gm38010       | 3,47 | No  |
| ENSMUSG00000104401 | -3,95E-02 | -2,963274761 | 7,08E-04 | 9,79E-01 | 1,00E+00 | Gm20750       | 0,97 | No  |
| ENSMUSG00000104405 | 3,64E-01  | -0,736033611 | 8,41E-01 | 3,59E-01 | 6,60E-01 | Gm31748       | 1,29 | No  |



|                    |           |              |           |          |          |               |      |     |
|--------------------|-----------|--------------|-----------|----------|----------|---------------|------|-----|
| ENSMUSG00000104406 | 7,65E-01  | -1,770603042 | 1,24E+00  | 2,65E-01 | 5,61E-01 | Gm38014       | 1,70 | No  |
| ENSMUSG00000104413 | 3,19E-01  | -2,311215952 | 1,03E-01  | 7,48E-01 | 9,30E-01 | Gm37065       | 1,25 | No  |
| ENSMUSG00000104414 | 3,14E-02  | -3,107617333 | -7,69E-10 | 1,00E+00 | 1,00E+00 | Gm37799       | 1,02 | No  |
| ENSMUSG00000104415 | 7,97E-03  | -1,033628137 | 2,75E-04  | 9,87E-01 | 1,00E+00 | Gm37069       | 1,01 | No  |
| ENSMUSG00000104416 | 2,18E-01  | -2,401368956 | 5,95E-02  | 8,07E-01 | 9,64E-01 | Gm37067       | 1,16 | No  |
| ENSMUSG00000104418 | -3,27E-01 | -0,006590713 | 1,11E+00  | 2,92E-01 | 5,87E-01 | Gm37070       | 0,80 | No  |
| ENSMUSG00000104419 | -4,13E-02 | -3,033659495 | 7,08E-04  | 9,79E-01 | 1,00E+00 | 2900092O11Rik | 0,97 | No  |
| ENSMUSG00000104420 | -1,98E-02 | -3,033655952 | 2,83E-11  | 1,00E+00 | 1,00E+00 | E230020A03Rik | 0,99 | No  |
| ENSMUSG00000104427 | -1,57E+00 | -2,185511667 | 3,55E+00  | 5,97E-02 | 3,02E-01 | Gm38368       | 0,34 | No  |
| ENSMUSG00000104432 | -1,48E-01 | -1,107689844 | 9,46E-02  | 7,58E-01 | 9,36E-01 | A430027C01Rik | 0,90 | No  |
| ENSMUSG00000104434 | 1,81E+00  | -3,10765737  | 1,28E+00  | 2,58E-01 | 5,50E-01 | Gm37421       | 3,49 | No  |
| ENSMUSG00000104435 | -3,14E-02 | 3,694726477  | 1,10E-01  | 7,40E-01 | 9,26E-01 | Gm37422       | 0,98 | No  |
| ENSMUSG00000104436 | 2,00E-01  | -0,322188216 | 3,63E-01  | 5,47E-01 | 8,14E-01 | Gm37423       | 1,15 | No  |
| ENSMUSG00000104440 | 1,89E+00  | -3,033614598 | 1,38E+00  | 2,40E-01 | 5,50E-01 | Gm19030       | 3,70 | No  |
| ENSMUSG00000104443 | -6,62E-02 | 2,505444789  | 2,52E-01  | 6,16E-01 | 8,54E-01 | 4932442E05Rik | 0,96 | No  |
| ENSMUSG00000104444 | -2,86E-01 | 1,975884938  | 3,60E+00  | 5,77E-02 | 2,96E-01 | Gm33051       | 0,82 | No  |
| ENSMUSG00000104445 | -2,92E-03 | -3,107634635 | 4,90E-12  | 1,00E+00 | 1,00E+00 | Rhbg          | 1,00 | No  |
| ENSMUSG00000104448 | 4,91E-01  | -0,442742502 | 1,90E+00  | 1,68E-01 | 5,23E-01 | Gm37256       | 1,41 | No  |
| ENSMUSG00000104449 | 1,99E-01  | 0,198838561  | 4,81E-01  | 4,88E-01 | 7,75E-01 | Gm37255       | 1,15 | No  |
| ENSMUSG00000104452 | -1,87E+00 | -3,107637761 | 1,39E+00  | 2,38E-01 | 5,50E-01 | lghv8-8       | 0,27 | No  |
| ENSMUSG00000104453 | 6,44E-02  | 0,546779414  | 6,75E-02  | 7,95E-01 | 9,57E-01 | Gm37829       | 1,05 | No  |
| ENSMUSG00000104454 | 3,14E-02  | -3,107617333 | -7,69E-10 | 1,00E+00 | 1,00E+00 | Gm37827       | 1,02 | No  |
| ENSMUSG00000104457 | -1,94E+00 | -3,107619243 | 1,50E+00  | 2,21E-01 | 5,50E-01 | Gm37826       | 0,26 | No  |
| ENSMUSG00000104459 | 8,31E-01  | -2,548242298 | 6,01E-01  | 4,38E-01 | 7,31E-01 | Gm37824       | 1,78 | No  |
| ENSMUSG00000104464 | 9,01E-03  | -3,107646452 | -5,16E-10 | 1,00E+00 | 1,00E+00 | Gm18698       | 1,01 | No  |
| ENSMUSG00000104466 | -1,87E+00 | -3,107637761 | 1,39E+00  | 2,38E-01 | 5,50E-01 | Gm10513       | 0,27 | No  |
| ENSMUSG00000104467 | 2,30E-01  | 0,705247533  | 9,39E-01  | 3,33E-01 | 6,33E-01 | Gm37660       | 1,17 | No  |
| ENSMUSG00000104469 | -3,09E+00 | -2,401318134 | 1,01E+01  | 1,50E-03 | 2,23E-02 | Gm37663       | 0,12 | Yes |
| ENSMUSG00000104479 | -8,82E-01 | -0,535227214 | 5,50E+00  | 1,91E-02 | 1,46E-01 | Gm10305       | 0,54 | No  |
| ENSMUSG00000104484 | -4,42E-01 | -1,770594275 | 5,66E-01  | 4,52E-01 | 7,41E-01 | Gm33142       | 0,74 | No  |
| ENSMUSG00000104485 | -3,83E-02 | -3,107651936 | -7,91E-11 | 1,00E+00 | 1,00E+00 | Gm38065       | 0,97 | No  |
| ENSMUSG00000104487 | 1,87E+00  | -3,107639691 | 1,38E+00  | 2,40E-01 | 5,50E-01 | Gm31373       | 3,67 | No  |

|                    |           |              |           |          |          |            |      |    |
|--------------------|-----------|--------------|-----------|----------|----------|------------|------|----|
| ENSMUSG00000104488 | -9,01E-01 | -1,448540969 | 3,01E+00  | 8,28E-02 | 3,70E-01 | Gm38062    | 0,54 | No |
| ENSMUSG00000104491 | -7,00E-02 | 2,311996101  | 2,57E-01  | 6,12E-01 | 8,52E-01 | Gm32340    | 0,95 | No |
| ENSMUSG00000104493 | 2,07E+00  | -2,268174077 | 5,47E+00  | 1,94E-02 | 1,48E-01 | Gm19552    | 4,20 | No |
| ENSMUSG00000104496 | 8,61E-02  | 4,492459218  | 1,14E+00  | 2,85E-01 | 5,81E-01 | Gm5837     | 1,06 | No |
| ENSMUSG00000104497 | -2,47E-01 | -2,226227293 | 1,20E-01  | 7,29E-01 | 9,20E-01 | Gm10555    | 0,84 | No |
| ENSMUSG00000104498 | -9,95E-01 | -2,226250892 | 1,20E+00  | 2,73E-01 | 5,70E-01 | Gm37110    | 0,50 | No |
| ENSMUSG00000104503 | -4,69E-01 | -0,366840009 | 1,88E+00  | 1,71E-01 | 5,26E-01 | Gm37738    | 0,72 | No |
| ENSMUSG00000104509 | -3,83E-02 | -3,107651936 | -7,91E-11 | 1,00E+00 | 1,00E+00 | Gm33994    | 0,97 | No |
| ENSMUSG00000104512 | 1,17E+00  | -3,14612376  | 6,40E-01  | 4,24E-01 | 7,18E-01 | Gm37165    | 2,26 | No |
| ENSMUSG00000104514 | -1,28E-01 | 2,484259252  | 9,65E-01  | 3,26E-01 | 6,27E-01 | Gm37164    | 0,92 | No |
| ENSMUSG00000104515 | -7,08E-01 | -2,497506717 | 5,60E-01  | 4,54E-01 | 7,44E-01 | Gm37163    | 0,61 | No |
| ENSMUSG00000104517 | 6,22E-01  | -2,401380051 | 4,31E-01  | 5,11E-01 | 7,94E-01 | Gm18407    | 1,54 | No |
| ENSMUSG00000104519 | -1,89E+00 | -3,033648118 | 1,42E+00  | 2,33E-01 | 5,50E-01 | Gm37161    | 0,27 | No |
| ENSMUSG00000104520 | -6,85E-01 | -1,051890235 | 2,15E+00  | 1,42E-01 | 4,77E-01 | Gm37336    | 0,62 | No |
| ENSMUSG00000104523 | 1,73E-01  | 1,93775      | 1,27E+00  | 2,60E-01 | 5,53E-01 | Gm37335    | 1,13 | No |
| ENSMUSG00000104524 | 5,88E-01  | -2,355613748 | 3,86E-01  | 5,35E-01 | 8,07E-01 | Gm37333    | 1,50 | No |
| ENSMUSG00000104525 | -3,07E-01 | -1,755673922 | 2,25E-01  | 6,35E-01 | 8,67E-01 | Gm37334    | 0,81 | No |
| ENSMUSG00000104527 | -1,90E+00 | -3,033594154 | 1,44E+00  | 2,30E-01 | 5,50E-01 | Gm37332    | 0,27 | No |
| ENSMUSG00000104529 | 1,04E-01  | -2,070264962 | 2,40E-02  | 8,77E-01 | 1,00E+00 | Rbakdn     | 1,07 | No |
| ENSMUSG00000104535 | -6,13E-01 | -2,212699716 | 5,68E-01  | 4,51E-01 | 7,41E-01 | Gm42686    | 0,65 | No |
| ENSMUSG00000104546 | -7,96E-02 | 1,875846039  | 2,50E-01  | 6,17E-01 | 8,55E-01 | Gm43858    | 0,95 | No |
| ENSMUSG00000104548 | 9,01E-02  | 3,556297896  | 8,32E-01  | 3,62E-01 | 6,63E-01 | Gm43857    | 1,06 | No |
| ENSMUSG00000104550 | 4,53E-01  | -2,268198141 | 2,78E-01  | 5,98E-01 | 8,45E-01 | Gm43589    | 1,37 | No |
| ENSMUSG00000104552 | -1,23E+00 | -2,998015869 | 7,15E-01  | 3,98E-01 | 6,98E-01 | AC157602.1 | 0,43 | No |
| ENSMUSG00000104554 | 3,74E-01  | 0,824132187  | 2,92E+00  | 8,73E-02 | 3,78E-01 | Gm4610     | 1,30 | No |
| ENSMUSG00000104555 | -1,67E-01 | 0,508549781  | 4,87E-01  | 4,85E-01 | 7,72E-01 | Gm5983     | 0,89 | No |
| ENSMUSG00000104556 | 1,85E+00  | -3,107657832 | 1,35E+00  | 2,46E-01 | 5,50E-01 | Gm43192    | 3,61 | No |
| ENSMUSG00000104559 | 1,53E-02  | 3,599123536  | 2,44E-02  | 8,76E-01 | 1,00E+00 | Gm43118    | 1,01 | No |
| ENSMUSG00000104560 | -1,11E-01 | 2,794366954  | 8,65E-01  | 3,52E-01 | 6,53E-01 | Gm8115     | 0,93 | No |
| ENSMUSG00000104563 | -1,57E+00 | -2,146035514 | 4,61E+00  | 3,17E-02 | 2,07E-01 | Gm43041    | 0,34 | No |
| ENSMUSG00000104566 | -2,66E+00 | -3,033639428 | 2,81E+00  | 9,35E-02 | 3,83E-01 | Mir7227    | 0,16 | No |
| ENSMUSG00000104569 | -6,78E-01 | -1,311028597 | 1,85E+00  | 1,74E-01 | 5,32E-01 | Gm43054    | 0,63 | No |

|                    |           |              |           |          |          |               |      |     |
|--------------------|-----------|--------------|-----------|----------|----------|---------------|------|-----|
| ENSMUSG00000104571 | -7,30E-02 | -2,311156935 | 7,36E-03  | 9,32E-01 | 1,00E+00 | Gm43010       | 0,95 | No  |
| ENSMUSG00000104574 | 4,50E-01  | 2,218634178  | 9,54E+00  | 2,01E-03 | 2,82E-02 | Gm42836       | 1,37 | Yes |
| ENSMUSG00000104576 | -1,90E+00 | -3,033647263 | 1,44E+00  | 2,30E-01 | 5,50E-01 | F830115B05Rik | 0,27 | No  |
| ENSMUSG00000104577 | -4,16E+00 | -2,548181096 | 8,79E+00  | 3,02E-03 | 3,85E-02 | Gm6641        | 0,06 | Yes |
| ENSMUSG00000104578 | 5,29E-01  | -1,136394709 | 1,23E+00  | 2,67E-01 | 5,63E-01 | Gm8929        | 1,44 | No  |
| ENSMUSG00000104585 | -1,71E+00 | -2,770616096 | 2,04E+00  | 1,53E-01 | 4,96E-01 | 4921511C10Rik | 0,30 | No  |
| ENSMUSG00000104589 | 3,89E-01  | 0,053688085  | 1,64E+00  | 2,01E-01 | 5,50E-01 | Gm44311       | 1,31 | No  |
| ENSMUSG00000104591 | -3,26E-01 | 2,039555989  | 4,71E+00  | 3,01E-02 | 1,99E-01 | Gm43145       | 0,80 | No  |
| ENSMUSG00000104592 | 1,81E+00  | -3,10765737  | 1,28E+00  | 2,58E-01 | 5,50E-01 | Gm42721       | 3,49 | No  |
| ENSMUSG00000104594 | -2,81E-01 | -3,09553591  | 2,98E-02  | 8,63E-01 | 9,97E-01 | Gm24022       | 0,82 | No  |
| ENSMUSG00000104597 | 1,44E-01  | -0,839732742 | 1,33E-01  | 7,15E-01 | 9,12E-01 | B230334C09Rik | 1,11 | No  |
| ENSMUSG00000104598 | -6,39E-01 | -2,896151481 | 2,69E-01  | 6,04E-01 | 8,49E-01 | Gm30214       | 0,64 | No  |
| ENSMUSG00000104599 | 1,85E-03  | 0,30427637   | 4,88E-05  | 9,94E-01 | 1,00E+00 | AC154540.1    | 1,00 | No  |
| ENSMUSG00000104600 | 2,64E+00  | -3,033673223 | 2,69E+00  | 1,01E-01 | 3,92E-01 | Dmrt1i        | 6,23 | No  |
| ENSMUSG00000104601 | -5,80E-01 | -2,655174447 | 2,63E-01  | 6,08E-01 | 8,50E-01 | Gm29745       | 0,67 | No  |
| ENSMUSG00000104603 | -1,79E-01 | -0,748151155 | 2,08E-01  | 6,48E-01 | 8,75E-01 | AL845457.1    | 0,88 | No  |
| ENSMUSG00000104605 | -6,44E-03 | -0,541797792 | 3,21E-04  | 9,86E-01 | 1,00E+00 | Gm42922       | 1,00 | No  |
| ENSMUSG00000104606 | -1,94E+00 | -3,107619243 | 1,50E+00  | 2,21E-01 | 5,50E-01 | Gm43409       | 0,26 | No  |
| ENSMUSG00000104608 | 2,59E-01  | -2,472927212 | 7,62E-02  | 7,83E-01 | 9,50E-01 | Gm44390       | 1,20 | No  |
| ENSMUSG00000104617 | -8,52E-01 | -2,896118986 | 3,98E-01  | 5,28E-01 | 8,04E-01 | Gm43356       | 0,55 | No  |
| ENSMUSG00000104618 | 1,38E-01  | -2,286495992 | 2,82E-02  | 8,67E-01 | 9,99E-01 | Mir1839       | 1,10 | No  |
| ENSMUSG00000104621 | 1,85E+00  | -3,107657832 | 1,35E+00  | 2,46E-01 | 5,50E-01 | Gm43185       | 3,61 | No  |
| ENSMUSG00000104623 | -2,30E-01 | 6,734058547  | 1,39E+01  | 1,98E-04 | 4,31E-03 | Gm6394        | 0,85 | Yes |
| ENSMUSG00000104626 | 9,01E-03  | -3,107646452 | -5,16E-10 | 1,00E+00 | 1,00E+00 | Gm42675       | 1,01 | No  |
| ENSMUSG00000104627 | 1,42E+00  | -1,76051626  | 5,22E+00  | 2,23E-02 | 1,62E-01 | Mir3535       | 2,68 | No  |
| ENSMUSG00000104631 | -8,38E-01 | -2,770640249 | 3,85E-01  | 5,35E-01 | 8,07E-01 | Gm43774       | 0,56 | No  |
| ENSMUSG00000104632 | 1,85E+00  | -3,107657832 | 1,35E+00  | 2,46E-01 | 5,50E-01 | Gm42909       | 3,61 | No  |
| ENSMUSG00000104633 | -2,66E-01 | -0,041046357 | 8,18E-01  | 3,66E-01 | 6,67E-01 | Gm42421       | 0,83 | No  |
| ENSMUSG00000104639 | 1,87E+00  | -3,03364371  | 1,36E+00  | 2,43E-01 | 5,50E-01 | Gm42939       | 3,66 | No  |
| ENSMUSG00000104641 | 7,04E-02  | -1,963317494 | 1,21E-02  | 9,12E-01 | 1,00E+00 | Gm43290       | 1,05 | No  |
| ENSMUSG00000104642 | 2,35E-01  | 4,387158498  | 8,22E+00  | 4,13E-03 | 4,85E-02 | Gm9207        | 1,18 | Yes |
| ENSMUSG00000104646 | -2,12E-01 | 1,480740052  | 1,39E+00  | 2,38E-01 | 5,50E-01 | Gm9173        | 0,86 | No  |

|                    |           |              |           |          |          |               |  |      |    |
|--------------------|-----------|--------------|-----------|----------|----------|---------------|--|------|----|
| ENSMUSG00000104648 | 1,85E+00  | -3,107657832 | 1,35E+00  | 2,46E-01 | 5,50E-01 | Gm42570       |  | 3,61 | No |
| ENSMUSG00000104649 | -1,40E-01 | 6,29166098   | 4,83E+00  | 2,79E-02 | 1,89E-01 | Gm43712       |  | 0,91 | No |
| ENSMUSG00000104650 | 2,64E+00  | -3,033673223 | 2,69E+00  | 1,01E-01 | 3,92E-01 | Trav22        |  | 6,23 | No |
| ENSMUSG00000104653 | -7,29E-01 | -2,088732311 | 9,95E-01  | 3,19E-01 | 6,19E-01 | Gm43109       |  | 0,60 | No |
| ENSMUSG00000104654 | -2,84E-01 | -2,185641409 | 1,40E-01  | 7,09E-01 | 9,09E-01 | Gm43814       |  | 0,82 | No |
| ENSMUSG00000104655 | 1,87E+00  | -3,107639691 | 1,38E+00  | 2,40E-01 | 5,50E-01 | Gm43317       |  | 3,67 | No |
| ENSMUSG00000104656 | -8,70E-01 | -2,146151109 | 1,36E+00  | 2,44E-01 | 5,50E-01 | Gm44483       |  | 0,55 | No |
| ENSMUSG00000104657 | 2,82E-01  | -2,497619381 | 9,07E-02  | 7,63E-01 | 9,39E-01 | AL928567.1    |  | 1,22 | No |
| ENSMUSG00000104660 | -8,91E-02 | -2,896169321 | 3,42E-03  | 9,53E-01 | 1,00E+00 | Gm43601       |  | 0,94 | No |
| ENSMUSG00000104662 | 8,56E-01  | -2,268166872 | 1,13E+00  | 2,89E-01 | 5,85E-01 | Gm43267       |  | 1,81 | No |
| ENSMUSG00000104663 | -1,03E-01 | 0,412464559  | 1,76E-01  | 6,75E-01 | 8,91E-01 | Gm3203        |  | 0,93 | No |
| ENSMUSG00000104664 | 4,71E-01  | -2,831974262 | 1,74E-01  | 6,77E-01 | 8,91E-01 | Gm35570       |  | 1,39 | No |
| ENSMUSG00000104667 | 1,25E-01  | 1,225821232  | 4,17E-01  | 5,19E-01 | 7,98E-01 | Gm4961        |  | 1,09 | No |
| ENSMUSG00000104670 | -1,87E+00 | -3,107637761 | 1,39E+00  | 2,38E-01 | 5,50E-01 | Gm9369        |  | 0,27 | No |
| ENSMUSG00000104671 | 8,03E-01  | -0,460671895 | 4,03E+00  | 4,48E-02 | 2,52E-01 | Gm43062       |  | 1,75 | No |
| ENSMUSG00000104672 | -3,83E-02 | -3,107651936 | -7,91E-11 | 1,00E+00 | 1,00E+00 | Gm43665       |  | 0,97 | No |
| ENSMUSG00000104675 | -1,81E+00 | -2,424731733 | 3,74E+00  | 5,31E-02 | 2,81E-01 | Gm43689       |  | 0,28 | No |
| ENSMUSG00000104676 | 4,24E-02  | -3,033592245 | -1,17E-09 | 1,00E+00 | 1,00E+00 | Gm42777       |  | 1,03 | No |
| ENSMUSG00000104682 | -1,21E-01 | 0,295535962  | 1,99E-01  | 6,56E-01 | 8,80E-01 | Gm42636       |  | 0,92 | No |
| ENSMUSG00000104686 | 2,38E-01  | -0,295016577 | 5,27E-01  | 4,68E-01 | 7,56E-01 | Gm42815       |  | 1,18 | No |
| ENSMUSG00000104690 | -3,25E-01 | -1,946158401 | 2,14E-01  | 6,44E-01 | 8,72E-01 | AC156953.1    |  | 0,80 | No |
| ENSMUSG00000104693 | 1,65E-02  | 0,496401333  | 4,04E-03  | 9,49E-01 | 1,00E+00 | Gm42941       |  | 1,01 | No |
| ENSMUSG00000104694 | 1,23E+00  | -2,832030918 | 9,42E-01  | 3,32E-01 | 6,32E-01 | Gm43797       |  | 2,35 | No |
| ENSMUSG00000104695 | 7,46E-01  | -2,711746745 | 3,02E-01  | 5,83E-01 | 8,38E-01 | Gm30023       |  | 1,68 | No |
| ENSMUSG00000104698 | -6,57E-01 | 0,409485951  | 6,98E+00  | 8,26E-03 | 8,10E-02 | Gm42602       |  | 0,63 | No |
| ENSMUSG00000104699 | -1,03E-01 | 5,687171618  | 2,32E+00  | 1,27E-01 | 4,48E-01 | Rps4x-ps      |  | 0,93 | No |
| ENSMUSG00000104701 | -1,90E+00 | -3,033594154 | 1,44E+00  | 2,30E-01 | 5,50E-01 | Gm42555       |  | 0,27 | No |
| ENSMUSG00000104704 | 3,94E-01  | -1,522796247 | 5,92E-01  | 4,42E-01 | 7,34E-01 | Gm43133       |  | 1,31 | No |
| ENSMUSG00000104705 | 1,81E+00  | -3,10765737  | 1,28E+00  | 2,58E-01 | 5,50E-01 | 4930405N21Rik |  | 3,49 | No |
| ENSMUSG00000104706 | -3,84E-01 | -1,522622928 | 4,97E-01  | 4,81E-01 | 7,69E-01 | Gm43421       |  | 0,77 | No |
| ENSMUSG00000104708 | 1,34E+00  | -2,401368868 | 1,85E+00  | 1,74E-01 | 5,32E-01 | Gm42503       |  | 2,54 | No |
| ENSMUSG00000104709 | 1,82E+00  | -3,033667329 | 1,31E+00  | 2,52E-01 | 5,50E-01 | Gm42484       |  | 3,54 | No |

|                    |           |              |          |          |          |               |      |    |
|--------------------|-----------|--------------|----------|----------|----------|---------------|------|----|
| ENSMUSG00000104710 | -1,92E+00 | -2,963268013 | 1,46E+00 | 2,27E-01 | 5,50E-01 | Gm31243       | 0,26 | No |
| ENSMUSG00000104713 | -5,90E-02 | 2,681150327  | 2,41E-01 | 6,24E-01 | 8,58E-01 | Gbp6          | 0,96 | No |
| ENSMUSG00000104717 | 7,43E-01  | -2,963261206 | 3,01E-01 | 5,83E-01 | 8,38E-01 | Gm33969       | 1,67 | No |
| ENSMUSG00000104719 | -1,82E+00 | -1,929113532 | 5,25E+00 | 2,20E-02 | 1,60E-01 | 4933437G19Rik | 0,28 | No |
| ENSMUSG00000104720 | -2,93E-01 | -1,126783153 | 4,10E-01 | 5,22E-01 | 8,00E-01 | Gm43138       | 0,82 | No |
| ENSMUSG00000104723 | 2,64E-02  | 2,180083437  | 3,49E-02 | 8,52E-01 | 9,90E-01 | Gm43106       | 1,02 | No |
| ENSMUSG00000104724 | 2,97E-01  | 0,365339775  | 1,36E+00 | 2,44E-01 | 5,50E-01 | Gm43162       | 1,23 | No |
| ENSMUSG00000104728 | 1,43E-01  | 2,074931522  | 9,08E-01 | 3,41E-01 | 6,41E-01 | Gm42462       | 1,10 | No |
| ENSMUSG00000104729 | 1,94E-01  | 0,887467759  | 8,26E-01 | 3,63E-01 | 6,64E-01 | Gm44471       | 1,14 | No |
| ENSMUSG00000104737 | -2,47E-01 | 0,160400117  | 7,37E-01 | 3,91E-01 | 6,91E-01 | Gm42937       | 0,84 | No |
| ENSMUSG00000104738 | -1,94E+00 | -3,107619243 | 1,50E+00 | 2,21E-01 | 5,50E-01 | Trav3-2       | 0,26 | No |
| ENSMUSG00000104739 | 1,88E-04  | -0,980619412 | 1,75E-07 | 1,00E+00 | 1,00E+00 | Gm3283        | 1,00 | No |
| ENSMUSG00000104740 | -1,80E-02 | -1,296593788 | 1,35E-03 | 9,71E-01 | 1,00E+00 | Mir6516       | 0,99 | No |
| ENSMUSG00000104741 | 7,77E-02  | -1,436616334 | 2,01E-02 | 8,87E-01 | 1,00E+00 | Mir3087       | 1,06 | No |
| ENSMUSG00000104748 | 4,53E-01  | 0,028036797  | 2,34E+00 | 1,26E-01 | 4,44E-01 | Gm43592       | 1,37 | No |
| ENSMUSG00000104754 | -2,65E+00 | -3,033633091 | 2,78E+00 | 9,55E-02 | 3,86E-01 | Gm43116       | 0,16 | No |
| ENSMUSG00000104755 | 1,19E-01  | -1,209409016 | 6,36E-02 | 8,01E-01 | 9,61E-01 | Mir677        | 1,09 | No |
| ENSMUSG00000104756 | -7,19E-02 | -2,600720845 | 5,96E-03 | 9,38E-01 | 1,00E+00 | Gm42464       | 0,95 | No |
| ENSMUSG00000104761 | -1,42E-01 | 1,451800325  | 6,28E-01 | 4,28E-01 | 7,22E-01 | Gm43511       | 0,91 | No |
| ENSMUSG00000104762 | 3,85E-02  | -2,831943116 | 9,84E-12 | 1,00E+00 | 1,00E+00 | Gm44308       | 1,03 | No |
| ENSMUSG00000104763 | -1,39E+00 | -2,832014893 | 1,21E+00 | 2,71E-01 | 5,68E-01 | 9830132P13Rik | 0,38 | No |
| ENSMUSG00000104764 | -9,55E-01 | -2,600621518 | 7,99E-01 | 3,71E-01 | 6,72E-01 | Gm43066       | 0,52 | No |
| ENSMUSG00000104765 | 1,59E+00  | -2,522715762 | 2,23E+00 | 1,35E-01 | 4,62E-01 | Gm43058       | 3,00 | No |
| ENSMUSG00000104767 | -2,78E-01 | -2,655085177 | 6,57E-02 | 7,98E-01 | 9,59E-01 | AC139186.1    | 0,82 | No |
| ENSMUSG00000104771 | 5,75E-01  | -2,165801993 | 4,65E-01 | 4,95E-01 | 7,81E-01 | Gm44394       | 1,49 | No |
| ENSMUSG00000104773 | -6,11E-01 | 0,641715409  | 7,76E+00 | 5,33E-03 | 5,86E-02 | Mir7657       | 0,65 | No |
| ENSMUSG00000104774 | 5,35E-01  | -0,093741981 | 2,93E+00 | 8,69E-02 | 3,78E-01 | Gm8920        | 1,45 | No |
| ENSMUSG00000104776 | -4,94E-01 | -2,896148167 | 1,23E-01 | 7,26E-01 | 9,18E-01 | Gm43691       | 0,71 | No |
| ENSMUSG00000104777 | 4,38E-01  | 0,586697968  | 3,59E+00 | 5,80E-02 | 2,97E-01 | Gm4865        | 1,35 | No |
| ENSMUSG00000104781 | -1,36E+00 | -2,831960587 | 1,15E+00 | 2,83E-01 | 5,79E-01 | Gm43303       | 0,39 | No |
| ENSMUSG00000104784 | 1,27E-01  | -0,95470189  | 9,72E-02 | 7,55E-01 | 9,34E-01 | Gm42984       | 1,09 | No |
| ENSMUSG00000104786 | 3,87E-02  | -0,383963331 | 1,32E-02 | 9,09E-01 | 1,00E+00 | Gm43573       | 1,03 | No |

|                    |           |              |           |          |          |               |      |     |
|--------------------|-----------|--------------|-----------|----------|----------|---------------|------|-----|
| ENSMUSG00000104787 | -2,88E-02 | -2,896161509 | 4,65E-04  | 9,83E-01 | 1,00E+00 | Gm19148       | 0,98 | No  |
| ENSMUSG00000104788 | 8,31E-02  | -0,06092615  | 7,57E-02  | 7,83E-01 | 9,50E-01 | Gm36448       | 1,06 | No  |
| ENSMUSG00000104793 | 3,15E+00  | -2,896153535 | 4,04E+00  | 4,44E-02 | 2,51E-01 | Gm43756       | 8,86 | No  |
| ENSMUSG00000104795 | -5,41E-01 | 1,548675759  | 9,47E+00  | 2,09E-03 | 2,90E-02 | Gm42783       | 0,69 | Yes |
| ENSMUSG00000104796 | 9,08E-01  | -3,082780237 | 4,48E-01  | 5,03E-01 | 7,88E-01 | Gm44354       | 1,88 | No  |
| ENSMUSG00000104802 | -1,68E-01 | 6,57913042   | 7,31E+00  | 6,86E-03 | 7,07E-02 | Gm5869        | 0,89 | No  |
| ENSMUSG00000104803 | 8,08E-02  | -2,424845606 | 9,47E-03  | 9,22E-01 | 1,00E+00 | Gm43108       | 1,06 | No  |
| ENSMUSG00000104806 | 5,81E-01  | -1,929237556 | 7,67E-01  | 3,81E-01 | 6,82E-01 | Gm42566       | 1,50 | No  |
| ENSMUSG00000104810 | -1,75E+00 | -2,770585895 | 2,13E+00  | 1,44E-01 | 4,80E-01 | Gm5684        | 0,30 | No  |
| ENSMUSG00000104813 | 2,06E-02  | -3,146103739 | -9,26E-10 | 1,00E+00 | 1,00E+00 | Mir451b       | 1,01 | No  |
| ENSMUSG00000104814 | 2,84E-01  | 0,592514612  | 1,43E+00  | 2,32E-01 | 5,50E-01 | Gm42979       | 1,22 | No  |
| ENSMUSG00000104818 | 5,70E-01  | -1,247177235 | 1,41E+00  | 2,36E-01 | 5,50E-01 | Gm43661       | 1,48 | No  |
| ENSMUSG00000104819 | 1,21E-01  | -0,436922161 | 1,31E-01  | 7,18E-01 | 9,14E-01 | 4930515G16Rik | 1,09 | No  |
| ENSMUSG00000104821 | 4,24E-02  | -3,033592245 | -1,17E-09 | 1,00E+00 | 1,00E+00 | Gm42481       | 1,03 | No  |
| ENSMUSG00000104822 | -1,25E-01 | 1,356927147  | 4,61E-01  | 4,97E-01 | 7,82E-01 | Gm42967       | 0,92 | No  |
| ENSMUSG00000104823 | -2,66E-02 | -1,436828071 | 2,70E-03  | 9,59E-01 | 1,00E+00 | Gm43182       | 0,98 | No  |
| ENSMUSG00000104824 | 1,81E+00  | -3,10765737  | 1,28E+00  | 2,58E-01 | 5,50E-01 | Gm21663       | 3,49 | No  |
| ENSMUSG00000104828 | 1,81E+00  | -3,10765737  | 1,28E+00  | 2,58E-01 | 5,50E-01 | Gm42898       | 3,49 | No  |
| ENSMUSG00000104830 | -8,69E-01 | -2,963204587 | 4,16E-01  | 5,19E-01 | 7,98E-01 | 5830487J09Rik | 0,55 | No  |
| ENSMUSG00000104831 | -2,49E-02 | -3,146121042 | -4,44E-11 | 1,00E+00 | 1,00E+00 | B020017C02Rik | 0,98 | No  |
| ENSMUSG00000104834 | -5,31E-01 | -0,200724907 | 2,72E+00  | 9,94E-02 | 3,92E-01 | Gm8861        | 0,69 | No  |
| ENSMUSG00000104835 | -4,53E-02 | 1,04563972   | 5,09E-02  | 8,21E-01 | 9,72E-01 | Gm5547        | 0,97 | No  |
| ENSMUSG00000104845 | 1,85E+00  | -3,107657832 | 1,35E+00  | 2,46E-01 | 5,50E-01 | 1700041I07Rik | 3,61 | No  |
| ENSMUSG00000104846 | 1,87E+00  | -3,107639691 | 1,38E+00  | 2,40E-01 | 5,50E-01 | Gm43020       | 3,67 | No  |
| ENSMUSG00000104847 | -9,10E-01 | -1,963253258 | 1,76E+00  | 1,84E-01 | 5,48E-01 | Gm43177       | 0,53 | No  |
| ENSMUSG00000104850 | 5,20E-01  | -2,62767989  | 2,56E-01  | 6,13E-01 | 8,53E-01 | Gm42901       | 1,43 | No  |
| ENSMUSG00000104852 | 5,50E-01  | -1,448817928 | 6,87E-01  | 4,07E-01 | 7,04E-01 | Gm43201       | 1,46 | No  |
| ENSMUSG00000104854 | 1,91E-01  | 0,586951983  | 6,37E-01  | 4,25E-01 | 7,19E-01 | Mir7116       | 1,14 | No  |
| ENSMUSG00000104856 | -9,21E-01 | -2,574230447 | 6,02E-01  | 4,38E-01 | 7,30E-01 | Rnu3b3        | 0,53 | No  |
| ENSMUSG00000104857 | 9,49E-01  | -2,333256608 | 1,27E+00  | 2,60E-01 | 5,53E-01 | Gm26413       | 1,93 | No  |
| ENSMUSG00000104862 | -2,83E-01 | 1,421406291  | 2,22E+00  | 1,36E-01 | 4,65E-01 | Gm6520        | 0,82 | No  |
| ENSMUSG00000104863 | 2,44E-01  | -2,917933072 | 2,91E-02  | 8,65E-01 | 9,98E-01 | AC121821.1    | 1,18 | No  |

|                    |           |              |           |          |          |               |      |     |
|--------------------|-----------|--------------|-----------|----------|----------|---------------|------|-----|
| ENSMUSG00000104864 | 4,54E-02  | 3,953013181  | 2,51E-01  | 6,17E-01 | 8,55E-01 | Gm43655       | 1,03 | No  |
| ENSMUSG00000104867 | -1,34E+00 | -2,832015733 | 1,12E+00  | 2,89E-01 | 5,85E-01 | Gm43728       | 0,40 | No  |
| ENSMUSG00000104871 | 1,87E+00  | -3,107639691 | 1,38E+00  | 2,40E-01 | 5,50E-01 | Gm42639       | 3,67 | No  |
| ENSMUSG00000104872 | -8,66E-02 | -0,051903985 | 8,10E-02  | 7,76E-01 | 9,46E-01 | 1700008B11Rik | 0,94 | No  |
| ENSMUSG00000104873 | -1,06E-01 | -3,033634182 | 5,86E-03  | 9,39E-01 | 1,00E+00 | Gm40332       | 0,93 | No  |
| ENSMUSG00000104874 | -6,04E-01 | -1,831821144 | 7,08E-01  | 4,00E-01 | 6,99E-01 | Gm43387       | 0,66 | No  |
| ENSMUSG00000104875 | -3,83E-02 | -3,107651936 | -7,91E-11 | 1,00E+00 | 1,00E+00 | Gm43397       | 0,97 | No  |
| ENSMUSG00000104877 | 2,19E-01  | -2,107612615 | 9,17E-02  | 7,62E-01 | 9,38E-01 | Gm42651       | 1,16 | No  |
| ENSMUSG00000104880 | 7,06E-01  | -1,393799587 | 1,57E+00  | 2,10E-01 | 5,50E-01 | AL645522.1    | 1,63 | No  |
| ENSMUSG00000104882 | -7,92E-02 | 2,253273836  | 3,23E-01  | 5,70E-01 | 8,31E-01 | Gm43096       | 0,95 | No  |
| ENSMUSG00000104884 | -1,53E-02 | 2,238692655  | 1,21E-02  | 9,12E-01 | 1,00E+00 | Mir5046       | 0,99 | No  |
| ENSMUSG00000104885 | -5,78E-02 | -2,896167382 | 2,23E-03  | 9,62E-01 | 1,00E+00 | Gm43758       | 0,96 | No  |
| ENSMUSG00000104887 | 1,81E+00  | -3,10765737  | 1,28E+00  | 2,58E-01 | 5,50E-01 | Gm43158       | 3,49 | No  |
| ENSMUSG00000104888 | -1,24E+00 | -1,510017814 | 5,23E+00  | 2,22E-02 | 1,61E-01 | 1500005C15Rik | 0,42 | No  |
| ENSMUSG00000104890 | -2,38E+00 | -2,963228295 | 2,20E+00  | 1,38E-01 | 4,69E-01 | Mir3084-1     | 0,19 | No  |
| ENSMUSG00000104891 | -4,91E-01 | -1,14605982  | 1,37E+00  | 2,43E-01 | 5,50E-01 | 2510017J16Rik | 0,71 | No  |
| ENSMUSG00000104892 | 5,90E-02  | 3,748360818  | 3,91E-01  | 5,32E-01 | 8,05E-01 | Gm6615        | 1,04 | No  |
| ENSMUSG00000104896 | 1,13E+00  | -2,600719228 | 1,21E+00  | 2,72E-01 | 5,69E-01 | Rnu3b4        | 2,18 | No  |
| ENSMUSG00000104897 | -1,42E-02 | 1,55126732   | 6,09E-03  | 9,38E-01 | 1,00E+00 | Gm43203       | 0,99 | No  |
| ENSMUSG00000104900 | 9,58E-02  | -1,401541824 | 3,63E-02  | 8,49E-01 | 9,88E-01 | 4930596I21Rik | 1,07 | No  |
| ENSMUSG00000104903 | -3,84E-01 | -1,929200442 | 3,42E-01  | 5,59E-01 | 8,22E-01 | Gm43707       | 0,77 | No  |
| ENSMUSG00000104904 | 1,42E-01  | -2,185598045 | 3,49E-02  | 8,52E-01 | 9,90E-01 | 9330198I05Rik | 1,10 | No  |
| ENSMUSG00000104906 | -1,87E+00 | -3,03364178  | 1,41E+00  | 2,36E-01 | 5,50E-01 | Gm43005       | 0,27 | No  |
| ENSMUSG00000104910 | -9,48E-01 | -1,600726459 | 2,52E+00  | 1,13E-01 | 4,13E-01 | Gm43331       | 0,52 | No  |
| ENSMUSG00000104911 | -7,58E-02 | -1,006957884 | 2,95E-02  | 8,64E-01 | 9,97E-01 | AC133189.1    | 0,95 | No  |
| ENSMUSG00000104913 | 1,64E-01  | 9,62436039   | 8,42E+00  | 3,72E-03 | 4,48E-02 | Gm6560        | 1,12 | Yes |
| ENSMUSG00000104914 | 1,65E-01  | -0,574292601 | 1,92E-01  | 6,61E-01 | 8,82E-01 | Mir7061       | 1,12 | No  |
| ENSMUSG00000104916 | -3,95E-02 | -2,963274761 | 7,08E-04  | 9,79E-01 | 1,00E+00 | Gm42830       | 0,97 | No  |
| ENSMUSG00000104917 | -5,72E-01 | -1,863798163 | 7,15E-01  | 3,98E-01 | 6,98E-01 | Gm43289       | 0,67 | No  |
| ENSMUSG00000104918 | -1,89E+00 | -3,1076441   | 1,42E+00  | 2,33E-01 | 5,50E-01 | Gm42944       | 0,27 | No  |
| ENSMUSG00000104920 | -2,63E-02 | -0,300282264 | 6,18E-03  | 9,37E-01 | 1,00E+00 | Gm43215       | 0,98 | No  |
| ENSMUSG00000104923 | 4,03E-02  | 5,523374034  | 3,42E-01  | 5,59E-01 | 8,22E-01 | Gm5865        | 1,03 | No  |

|                    |           |              |           |          |          |               |      |     |
|--------------------|-----------|--------------|-----------|----------|----------|---------------|------|-----|
| ENSMUSG00000104924 | -1,37E+00 | -2,831985043 | 1,18E+00  | 2,77E-01 | 5,74E-01 | Gm43002       | 0,39 | No  |
| ENSMUSG00000104925 | 1,03E+00  | -2,448700893 | 1,37E+00  | 2,42E-01 | 5,50E-01 | Gm43061       | 2,05 | No  |
| ENSMUSG00000104926 | 7,45E-01  | -2,070193058 | 9,90E-01  | 3,20E-01 | 6,20E-01 | Mir6947       | 1,68 | No  |
| ENSMUSG00000104927 | -1,89E+00 | -3,1076441   | 1,42E+00  | 2,33E-01 | 5,50E-01 | Gm43388       | 0,27 | No  |
| ENSMUSG00000104936 | -1,89E+00 | -3,1076441   | 1,42E+00  | 2,33E-01 | 5,50E-01 | 2610011E03Rik | 0,27 | No  |
| ENSMUSG00000104940 | 4,49E-01  | -2,600608149 | 1,57E-01  | 6,92E-01 | 9,00E-01 | Gm42908       | 1,36 | No  |
| ENSMUSG00000104941 | 2,15E+00  | -2,448745647 | 3,72E+00  | 5,39E-02 | 2,84E-01 | Gm8953        | 4,45 | No  |
| ENSMUSG00000104942 | -1,22E+00 | -2,448576499 | 1,43E+00  | 2,31E-01 | 5,50E-01 | Gm3321        | 0,43 | No  |
| ENSMUSG00000104943 | -7,14E-02 | -1,832111265 | 1,55E-02  | 9,01E-01 | 1,00E+00 | Gm42868       | 0,95 | No  |
| ENSMUSG00000104945 | 6,28E-01  | -0,006930746 | 4,58E+00  | 3,24E-02 | 2,10E-01 | Gm35715       | 1,55 | No  |
| ENSMUSG00000104946 | -7,74E-01 | -2,448740064 | 6,71E-01  | 4,13E-01 | 7,08E-01 | Gm19104       | 0,58 | No  |
| ENSMUSG00000104947 | -8,92E-01 | -1,05180419  | 3,68E+00  | 5,51E-02 | 2,88E-01 | Gm43721       | 0,54 | No  |
| ENSMUSG00000104950 | 2,04E-01  | 1,092869543  | 1,06E+00  | 3,03E-01 | 5,99E-01 | 4833413G10Rik | 1,15 | No  |
| ENSMUSG00000104951 | -3,81E-02 | 0,592908433  | 2,70E-02  | 8,69E-01 | 1,00E+00 | Gm43413       | 0,97 | No  |
| ENSMUSG00000104953 | -1,62E-01 | 3,566475411  | 2,75E+00  | 9,74E-02 | 3,89E-01 | AC147560.1    | 0,89 | No  |
| ENSMUSG00000104955 | -8,09E-01 | 1,874440637  | 2,83E+01  | 1,02E-07 | 5,70E-06 | 1700016F12Rik | 0,57 | Yes |
| ENSMUSG00000104958 | -4,72E-01 | -1,289429611 | 8,65E-01  | 3,52E-01 | 6,53E-01 | Mir7238       | 0,72 | No  |
| ENSMUSG00000104960 | -2,16E-01 | 2,803516014  | 3,41E+00  | 6,46E-02 | 3,18E-01 | Snhg8         | 0,86 | No  |
| ENSMUSG00000104961 | 2,36E+00  | -2,185677317 | 4,75E+00  | 2,94E-02 | 1,95E-01 | Gm43835       | 5,13 | No  |
| ENSMUSG00000104963 | -2,71E+00 | -3,033620915 | 2,92E+00  | 8,75E-02 | 3,78E-01 | Gm42974       | 0,15 | No  |
| ENSMUSG00000104964 | 9,01E-03  | -3,107646452 | -5,16E-10 | 1,00E+00 | 1,00E+00 | 4930597L12Rik | 1,01 | No  |
| ENSMUSG00000104965 | -3,09E-01 | -2,226291266 | 1,43E-01  | 7,05E-01 | 9,07E-01 | Gm43437       | 0,81 | No  |
| ENSMUSG00000104966 | 4,64E-01  | -2,548158792 | 1,68E-01  | 6,82E-01 | 8,94E-01 | Gm43273       | 1,38 | No  |
| ENSMUSG00000104967 | -1,91E+00 | -2,963268868 | 1,45E+00  | 2,29E-01 | 5,50E-01 | Gm43436       | 0,27 | No  |
| ENSMUSG00000104969 | 3,01E-02  | -0,34436162  | 8,48E-03  | 9,27E-01 | 1,00E+00 | Gm43445       | 1,02 | No  |
| ENSMUSG00000104970 | 7,12E-02  | 0,470990966  | 8,16E-02  | 7,75E-01 | 9,45E-01 | Gm43137       | 1,05 | No  |
| ENSMUSG00000104972 | 1,24E+00  | -2,770665722 | 9,49E-01  | 3,30E-01 | 6,30E-01 | Gm19931       | 2,36 | No  |
| ENSMUSG00000104973 | 1,22E+00  | -1,548156371 | 3,61E+00  | 5,74E-02 | 2,95E-01 | A530041M06Rik | 2,32 | No  |
| ENSMUSG00000104978 | 6,74E-01  | -1,051926578 | 1,90E+00  | 1,68E-01 | 5,23E-01 | Gm31274       | 1,60 | No  |
| ENSMUSG00000104979 | 8,15E-02  | -0,726266916 | 4,26E-02  | 8,37E-01 | 9,81E-01 | Mir6994       | 1,06 | No  |
| ENSMUSG00000104983 | -1,03E+00 | -0,808565854 | 5,52E+00  | 1,88E-02 | 1,45E-01 | Gm42763       | 0,49 | No  |
| ENSMUSG00000104985 | -3,10E-01 | -0,855706067 | 6,19E-01  | 4,31E-01 | 7,25E-01 | Gm42917       | 0,81 | No  |



|                    |           |              |           |          |          |               |      |    |
|--------------------|-----------|--------------|-----------|----------|----------|---------------|------|----|
| ENSMUSG00000104986 | -1,36E+00 | -2,548132042 | 1,17E+00  | 2,80E-01 | 5,77E-01 | 1600023N17Rik | 0,39 | No |
| ENSMUSG00000104988 | 1,30E-01  | -2,033596252 | 3,77E-02  | 8,46E-01 | 9,87E-01 | Gm43622       | 1,09 | No |
| ENSMUSG00000104996 | 6,34E-01  | -1,311316861 | 1,66E+00  | 1,97E-01 | 5,50E-01 | Mir6924       | 1,55 | No |
| ENSMUSG00000104997 | 3,47E-01  | -1,855757648 | 2,88E-01  | 5,91E-01 | 8,42E-01 | Gm44350       | 1,27 | No |
| ENSMUSG00000104999 | -1,89E+00 | -3,1076441   | 1,42E+00  | 2,33E-01 | 5,50E-01 | 4930477015Rik | 0,27 | No |
| ENSMUSG00000105001 | 7,99E-02  | 1,592568937  | 2,25E-01  | 6,35E-01 | 8,67E-01 | AC117232.1    | 1,06 | No |
| ENSMUSG00000105004 | -1,50E-01 | -1,8061665   | 5,34E-02  | 8,17E-01 | 9,70E-01 | Gm43075       | 0,90 | No |
| ENSMUSG00000105005 | 1,17E-02  | 2,899485109  | 1,01E-02  | 9,20E-01 | 1,00E+00 | Gm9729        | 1,01 | No |
| ENSMUSG00000105006 | 2,29E-01  | -0,535410938 | 3,66E-01  | 5,45E-01 | 8,13E-01 | Gm9484        | 1,17 | No |
| ENSMUSG00000105008 | 6,88E-02  | -2,126774748 | 6,27E-03  | 9,37E-01 | 1,00E+00 | Gm43652       | 1,05 | No |
| ENSMUSG00000105013 | 3,66E-01  | -2,185735514 | 2,14E-01  | 6,44E-01 | 8,72E-01 | Gm7721        | 1,29 | No |
| ENSMUSG00000105014 | -4,37E-01 | -2,333142691 | 2,73E-01  | 6,01E-01 | 8,47E-01 | Gm44367       | 0,74 | No |
| ENSMUSG00000105015 | -4,08E-02 | -2,963255775 | 7,59E-04  | 9,78E-01 | 1,00E+00 | Gm6059        | 0,97 | No |
| ENSMUSG00000105017 | -1,98E+00 | -2,800965423 | 2,07E+00  | 1,50E-01 | 4,92E-01 | Gm43107       | 0,25 | No |
| ENSMUSG00000105018 | -5,96E-02 | -2,268080093 | 4,91E-03  | 9,44E-01 | 1,00E+00 | Gm43546       | 0,96 | No |
| ENSMUSG00000105019 | -1,69E+00 | -2,107597908 | 4,32E+00  | 3,77E-02 | 2,31E-01 | Gm43547       | 0,31 | No |
| ENSMUSG00000105021 | -5,23E-01 | -2,146083985 | 4,39E-01  | 5,08E-01 | 7,92E-01 | Gm8234        | 0,70 | No |
| ENSMUSG00000105022 | 1,84E+00  | -3,033632273 | 1,33E+00  | 2,49E-01 | 5,50E-01 | Gm43537       | 3,58 | No |
| ENSMUSG00000105023 | 3,14E-02  | -3,107617333 | -7,69E-10 | 1,00E+00 | 1,00E+00 | 1700012D16Rik | 1,02 | No |
| ENSMUSG00000105024 | -5,23E-02 | -2,963273906 | 1,24E-03  | 9,72E-01 | 1,00E+00 | Gm43561       | 0,96 | No |
| ENSMUSG00000105025 | 1,69E-01  | -2,54819151  | 2,43E-02  | 8,76E-01 | 1,00E+00 | Rnu3b1        | 1,12 | No |
| ENSMUSG00000105031 | -1,68E-01 | 4,124473544  | 3,76E+00  | 5,26E-02 | 2,80E-01 | Gm3511        | 0,89 | No |
| ENSMUSG00000105042 | 5,67E-01  | -2,165821624 | 6,37E-01  | 4,25E-01 | 7,19E-01 | Gm42509       | 1,48 | No |
| ENSMUSG00000105044 | 3,71E-01  | -1,472867062 | 5,58E-01  | 4,55E-01 | 7,45E-01 | Gm10416       | 1,29 | No |
| ENSMUSG00000105045 | -2,37E-02 | -2,600611839 | 4,50E-04  | 9,83E-01 | 1,00E+00 | Rpl9-ps8      | 0,98 | No |
| ENSMUSG00000105047 | -1,17E+00 | -2,355525023 | 1,78E+00  | 1,82E-01 | 5,45E-01 | Gm42533       | 0,44 | No |
| ENSMUSG00000105049 | 2,64E+00  | -2,963240788 | 2,69E+00  | 1,01E-01 | 3,92E-01 | Gm42486       | 6,24 | No |
| ENSMUSG00000105050 | 1,85E+00  | -3,107657832 | 1,35E+00  | 2,46E-01 | 5,50E-01 | Gm42482       | 3,61 | No |
| ENSMUSG00000105051 | 2,61E+00  | -3,033672762 | 2,63E+00  | 1,05E-01 | 3,97E-01 | Gm4248        | 6,10 | No |
| ENSMUSG00000105053 | 2,85E-02  | 3,822766827  | 9,39E-02  | 7,59E-01 | 9,36E-01 | Gm43064       | 1,02 | No |
| ENSMUSG00000105055 | -9,49E-02 | 2,008768259  | 4,09E-01  | 5,22E-01 | 8,01E-01 | Gm43079       | 0,94 | No |
| ENSMUSG00000105057 | 1,20E-01  | -3,045971882 | 6,04E-03  | 9,38E-01 | 1,00E+00 | Gm40190       | 1,09 | No |

|                    |           |              |           |          |          |               |       |    |
|--------------------|-----------|--------------|-----------|----------|----------|---------------|-------|----|
| ENSMUSG00000105058 | 1,13E+00  | -2,401400482 | 1,21E+00  | 2,72E-01 | 5,68E-01 | Gm43590       | 2,18  | No |
| ENSMUSG00000105060 | 1,68E-01  | -1,472891036 | 9,03E-02  | 7,64E-01 | 9,39E-01 | Gm26457       | 1,12  | No |
| ENSMUSG00000105061 | 1,20E-02  | 2,341262135  | 8,00E-03  | 9,29E-01 | 1,00E+00 | Gm6740        | 1,01  | No |
| ENSMUSG00000105062 | 3,52E+00  | -2,655128421 | 5,39E+00  | 2,03E-02 | 1,53E-01 | Gm43113       | 11,49 | No |
| ENSMUSG00000105063 | 1,82E+00  | -3,033661385 | 1,31E+00  | 2,52E-01 | 5,50E-01 | Gm43488       | 3,54  | No |
| ENSMUSG00000105071 | 1,72E-01  | -0,460734943 | 2,09E-01  | 6,48E-01 | 8,75E-01 | Gm43336       | 1,13  | No |
| ENSMUSG00000105072 | 2,80E-01  | 2,864634416  | 5,58E+00  | 1,82E-02 | 1,42E-01 | Gm44335       | 1,21  | No |
| ENSMUSG00000105074 | -2,02E+00 | -2,548198474 | 3,10E+00  | 7,82E-02 | 3,57E-01 | Gm43818       | 0,25  | No |
| ENSMUSG00000105076 | 3,14E-02  | -3,107617333 | -7,69E-10 | 1,00E+00 | 1,00E+00 | A930003O13Rik | 1,02  | No |
| ENSMUSG00000105077 | 3,51E+00  | -2,548223148 | 5,35E+00  | 2,07E-02 | 1,55E-01 | Gm4859        | 11,39 | No |
| ENSMUSG00000105079 | -1,89E+00 | -3,033648118 | 1,42E+00  | 2,33E-01 | 5,50E-01 | Gm43715       | 0,27  | No |
| ENSMUSG00000105081 | 1,77E-02  | 3,410300312  | 3,05E-02  | 8,61E-01 | 9,96E-01 | Gm43110       | 1,01  | No |
| ENSMUSG00000105082 | -1,98E-02 | -3,033655952 | 2,83E-11  | 1,00E+00 | 1,00E+00 | Aqp10-ps      | 0,99  | No |
| ENSMUSG00000105084 | -9,35E-02 | 1,894640936  | 3,41E-01  | 5,59E-01 | 8,22E-01 | Gm43365       | 0,94  | No |
| ENSMUSG00000105085 | -4,89E-01 | -2,548138438 | 2,16E-01  | 6,42E-01 | 8,71E-01 | Gm42567       | 0,71  | No |
| ENSMUSG00000105093 | 9,11E-01  | -0,980635764 | 3,75E+00  | 5,28E-02 | 2,80E-01 | Gm17815       | 1,88  | No |
| ENSMUSG00000105095 | 5,31E-02  | -0,510240873 | 2,33E-02  | 8,79E-01 | 1,00E+00 | 8430422M14Rik | 1,04  | No |
| ENSMUSG00000105096 | 5,26E-02  | 0,926653509  | 6,49E-02  | 7,99E-01 | 9,59E-01 | Gbp10         | 1,04  | No |
| ENSMUSG00000105097 | -1,24E+00 | -3,107644849 | 7,21E-01  | 3,96E-01 | 6,96E-01 | Gm42133       | 0,42  | No |
| ENSMUSG00000105100 | -1,67E-01 | 0,776269264  | 5,68E-01  | 4,51E-01 | 7,41E-01 | Gm44349       | 0,89  | No |
| ENSMUSG00000105102 | -8,73E-01 | -2,574272653 | 8,89E-01  | 3,46E-01 | 6,47E-01 | Gm35507       | 0,55  | No |
| ENSMUSG00000105103 | 1,01E-01  | 3,103272138  | 8,27E-01  | 3,63E-01 | 6,64E-01 | Gm43191       | 1,07  | No |
| ENSMUSG00000105104 | -1,10E+00 | -2,929319864 | 7,07E-01  | 4,00E-01 | 6,99E-01 | Gm43729       | 0,47  | No |
| ENSMUSG00000105107 | -9,53E-02 | 2,702488034  | 5,82E-01  | 4,45E-01 | 7,36E-01 | Gm43412       | 0,94  | No |
| ENSMUSG00000105108 | 2,59E+00  | -2,770644052 | 2,62E+00  | 1,06E-01 | 3,98E-01 | Gm42687       | 6,04  | No |
| ENSMUSG00000105109 | -4,91E-01 | -2,963230978 | 1,21E-01  | 7,28E-01 | 9,20E-01 | Gm44297       | 0,71  | No |
| ENSMUSG00000105111 | -3,91E+00 | -2,770547352 | 7,32E+00  | 6,80E-03 | 7,03E-02 | Gm43310       | 0,07  | No |
| ENSMUSG00000105112 | -8,52E-02 | -2,311135113 | 1,00E-02  | 9,20E-01 | 1,00E+00 | Gm42778       | 0,94  | No |
| ENSMUSG00000105113 | 2,09E-01  | -1,548311779 | 1,12E-01  | 7,38E-01 | 9,26E-01 | Gm2622        | 1,16  | No |
| ENSMUSG00000105115 | -1,71E+00 | -2,683116831 | 2,04E+00  | 1,54E-01 | 4,97E-01 | Rnu3b2        | 0,31  | No |
| ENSMUSG00000105118 | -1,83E-01 | -2,051798155 | 6,01E-02  | 8,06E-01 | 9,64E-01 | Mir3084-2     | 0,88  | No |
| ENSMUSG00000105120 | 9,49E-01  | -2,333256608 | 1,27E+00  | 2,60E-01 | 5,53E-01 | Gm26413       | 1,93  | No |

|                    |           |              |           |          |          |               |      |     |
|--------------------|-----------|--------------|-----------|----------|----------|---------------|------|-----|
| ENSMUSG00000105123 | -1,89E+00 | -3,1076441   | 1,42E+00  | 2,33E-01 | 5,50E-01 | Ighv1-79      | 0,27 | No  |
| ENSMUSG00000105124 | 6,76E-02  | 5,439655914  | 9,42E-01  | 3,32E-01 | 6,32E-01 | Gm5297        | 1,05 | No  |
| ENSMUSG00000105127 | 1,01E+00  | -2,146239434 | 1,65E+00  | 1,99E-01 | 5,50E-01 | Gm42470       | 2,01 | No  |
| ENSMUSG00000105129 | 1,87E+00  | -3,107639691 | 1,38E+00  | 2,40E-01 | 5,50E-01 | Gm19566       | 3,67 | No  |
| ENSMUSG00000105130 | 2,43E+00  | -1,946268742 | 8,45E+00  | 3,65E-03 | 4,43E-02 | Gm43825       | 5,39 | Yes |
| ENSMUSG00000105134 | 8,70E-02  | -1,770611237 | 1,85E-02  | 8,92E-01 | 1,00E+00 | Gm42923       | 1,06 | No  |
| ENSMUSG00000105135 | 8,75E-02  | 0,802611246  | 1,56E-01  | 6,93E-01 | 9,01E-01 | Gm43667       | 1,06 | No  |
| ENSMUSG00000105137 | -1,45E-01 | 0,18724129   | 2,49E-01  | 6,18E-01 | 8,55E-01 | Gm42869       | 0,90 | No  |
| ENSMUSG00000105138 | 2,88E-01  | -2,683151535 | 5,09E-02  | 8,22E-01 | 9,72E-01 | Mir6964       | 1,22 | No  |
| ENSMUSG00000105139 | -2,43E-01 | -0,460682801 | 4,82E-01  | 4,88E-01 | 7,75E-01 | Gm19391       | 0,84 | No  |
| ENSMUSG00000105140 | 1,05E-01  | 1,821724159  | 4,40E-01  | 5,07E-01 | 7,91E-01 | Gm43127       | 1,08 | No  |
| ENSMUSG00000105143 | 7,22E-02  | 3,131477614  | 4,32E-01  | 5,11E-01 | 7,94E-01 | Gm8069        | 1,05 | No  |
| ENSMUSG00000105144 | -2,03E-01 | 2,431916576  | 2,29E+00  | 1,30E-01 | 4,53E-01 | Rpl21-ps11    | 0,87 | No  |
| ENSMUSG00000105145 | -8,38E-01 | -0,92908453  | 3,40E+00  | 6,53E-02 | 3,20E-01 | AC157822.1    | 0,56 | No  |
| ENSMUSG00000105148 | -1,87E+00 | -3,107637761 | 1,39E+00  | 2,38E-01 | 5,50E-01 | Gm42700       | 0,27 | No  |
| ENSMUSG00000105149 | -5,15E-01 | -2,185554956 | 4,26E-01  | 5,14E-01 | 7,96E-01 | Gm42983       | 0,70 | No  |
| ENSMUSG00000105156 | 7,73E-02  | 0,236925113  | 8,07E-02  | 7,76E-01 | 9,46E-01 | Gm9057        | 1,06 | No  |
| ENSMUSG00000105160 | 6,95E-01  | -2,896121668 | 2,62E-01  | 6,09E-01 | 8,51E-01 | A530030E21Rik | 1,62 | No  |
| ENSMUSG00000105161 | -2,77E-01 | 1,647739309  | 2,55E+00  | 1,11E-01 | 4,08E-01 | Gm42595       | 0,83 | No  |
| ENSMUSG00000105163 | 5,32E-01  | -1,683231087 | 9,69E-01  | 3,25E-01 | 6,26E-01 | Gm4873        | 1,45 | No  |
| ENSMUSG00000105165 | -9,92E-01 | -3,045964402 | 4,15E-01  | 5,20E-01 | 7,99E-01 | Mir7686       | 0,50 | No  |
| ENSMUSG00000105167 | -7,88E-01 | -0,963012018 | 3,52E+00  | 6,07E-02 | 3,05E-01 | Snord43       | 0,58 | No  |
| ENSMUSG00000105168 | -1,92E+00 | -3,033623267 | 1,46E+00  | 2,27E-01 | 5,50E-01 | Gm30735       | 0,26 | No  |
| ENSMUSG00000105171 | 2,85E-01  | -0,056565841 | 8,11E-01  | 3,68E-01 | 6,69E-01 | Gm5288        | 1,22 | No  |
| ENSMUSG00000105175 | 3,12E-01  | -2,497640167 | 9,93E-02  | 7,53E-01 | 9,33E-01 | Gm43097       | 1,24 | No  |
| ENSMUSG00000105176 | 6,05E-02  | 0,001921581  | 3,81E-02  | 8,45E-01 | 9,86E-01 | Gm43668       | 1,04 | No  |
| ENSMUSG00000105179 | -6,86E-02 | -2,655109801 | 5,42E-03  | 9,41E-01 | 1,00E+00 | Gm42866       | 0,95 | No  |
| ENSMUSG00000105180 | 7,65E-01  | -2,033664223 | 1,24E+00  | 2,65E-01 | 5,61E-01 | Gm4863        | 1,70 | No  |
| ENSMUSG00000105181 | 1,20E+00  | -2,89614401  | 8,87E-01  | 3,46E-01 | 6,47E-01 | Gm19620       | 2,30 | No  |
| ENSMUSG00000105186 | -3,83E-02 | -3,107651936 | -7,91E-11 | 1,00E+00 | 1,00E+00 | Gm43778       | 0,97 | No  |
| ENSMUSG00000105189 | 2,16E-01  | 4,244679124  | 6,38E+00  | 1,15E-02 | 1,04E-01 | Gm7774        | 1,16 | No  |
| ENSMUSG00000105194 | -1,27E-01 | 1,747860551  | 6,28E-01  | 4,28E-01 | 7,22E-01 | Gm6755        | 0,92 | No  |

|                    |           |              |           |          |          |               |      |     |
|--------------------|-----------|--------------|-----------|----------|----------|---------------|------|-----|
| ENSMUSG00000105195 | 1,82E-01  | 3,238401201  | 2,86E+00  | 9,10E-02 | 3,82E-01 | Gm43584       | 1,13 | No  |
| ENSMUSG00000105196 | -7,34E-01 | 1,355722423  | 1,56E+01  | 7,81E-05 | 1,97E-03 | Mir142        | 0,60 | Yes |
| ENSMUSG00000105198 | -9,25E-02 | 1,548677187  | 2,74E-01  | 6,01E-01 | 8,47E-01 | Gm42502       | 0,94 | No  |
| ENSMUSG00000105199 | 3,20E-01  | -1,107850743 | 5,20E-01  | 4,71E-01 | 7,59E-01 | Gm43581       | 1,25 | No  |
| ENSMUSG00000105200 | -1,13E+00 | -2,929285726 | 7,48E-01  | 3,87E-01 | 6,87E-01 | Mir378a       | 0,46 | No  |
| ENSMUSG00000105201 | 3,60E-02  | 1,378837235  | 3,95E-02  | 8,42E-01 | 9,85E-01 | Gm43362       | 1,03 | No  |
| ENSMUSG00000105202 | 9,01E-03  | -3,107646452 | -5,16E-10 | 1,00E+00 | 1,00E+00 | C230031I18Rik | 1,01 | No  |
| ENSMUSG00000105203 | -1,29E-02 | 0,941451016  | 3,68E-03  | 9,52E-01 | 1,00E+00 | 4933428P19Rik | 0,99 | No  |
| ENSMUSG00000105204 | 2,22E-01  | 4,300500418  | 7,02E+00  | 8,05E-03 | 7,94E-02 | Gm43738       | 1,17 | No  |
| ENSMUSG00000105205 | -3,83E-02 | -3,107651936 | -7,91E-11 | 1,00E+00 | 1,00E+00 | Gm44301       | 0,97 | No  |
| ENSMUSG00000105206 | 2,09E-01  | -0,863709968 | 2,70E-01  | 6,03E-01 | 8,48E-01 | Gm4870        | 1,16 | No  |
| ENSMUSG00000105207 | -9,51E-01 | -2,655082447 | 7,93E-01  | 3,73E-01 | 6,74E-01 | Gm42927       | 0,52 | No  |
| ENSMUSG00000105211 | -1,90E+00 | -3,107628502 | 1,44E+00  | 2,29E-01 | 5,50E-01 | AC125167.1    | 0,27 | No  |
| ENSMUSG00000105212 | 2,62E+00  | -3,033654625 | 2,66E+00  | 1,03E-01 | 3,95E-01 | Gm43557       | 6,16 | No  |
| ENSMUSG00000105217 | 8,10E-01  | -1,711767334 | 1,83E+00  | 1,76E-01 | 5,36E-01 | Gm42873       | 1,75 | No  |
| ENSMUSG00000105219 | -1,94E+00 | -3,107619243 | 1,50E+00  | 2,21E-01 | 5,50E-01 | Gm43821       | 0,26 | No  |
| ENSMUSG00000105223 | -1,94E+00 | -3,107619243 | 1,50E+00  | 2,21E-01 | 5,50E-01 | Gm43433       | 0,26 | No  |
| ENSMUSG00000105226 | -1,90E+00 | -3,033594154 | 1,44E+00  | 2,30E-01 | 5,50E-01 | A930028O11Rik | 0,27 | No  |
| ENSMUSG00000105228 | 2,63E+00  | -2,929324858 | 2,68E+00  | 1,02E-01 | 3,94E-01 | Gm43340       | 6,20 | No  |
| ENSMUSG00000105229 | -4,36E-02 | -2,355510917 | 3,02E-03  | 9,56E-01 | 1,00E+00 | Gm43149       | 0,97 | No  |
| ENSMUSG00000105230 | 1,36E+00  | -2,311251363 | 1,89E+00  | 1,70E-01 | 5,25E-01 | Gm42433       | 2,56 | No  |
| ENSMUSG00000105232 | 5,67E-02  | -0,80347708  | 2,12E-02  | 8,84E-01 | 1,00E+00 | AC124457.1    | 1,04 | No  |
| ENSMUSG00000105233 | -2,61E-01 | 2,59253344   | 4,35E+00  | 3,70E-02 | 2,29E-01 | Gm20568       | 0,83 | No  |
| ENSMUSG00000105235 | -5,12E-01 | -2,107561259 | 4,20E-01  | 5,17E-01 | 7,98E-01 | Hcfc1r1-ps1   | 0,70 | No  |
| ENSMUSG00000105238 | 5,37E-01  | -2,31120389  | 3,56E-01  | 5,51E-01 | 8,17E-01 | Gm44357       | 1,45 | No  |
| ENSMUSG00000105241 | -6,81E-01 | -2,226265489 | 7,89E-01  | 3,74E-01 | 6,75E-01 | Gm43542       | 0,62 | No  |
| ENSMUSG00000105243 | -4,53E-02 | 1,752737062  | 7,94E-02  | 7,78E-01 | 9,47E-01 | Gm43444       | 0,97 | No  |
| ENSMUSG00000105244 | -6,99E-02 | -2,033735181 | 9,06E-03  | 9,24E-01 | 1,00E+00 | Gm5281        | 0,95 | No  |
| ENSMUSG00000105245 | 4,02E-01  | -1,997915526 | 2,57E-01  | 6,12E-01 | 8,52E-01 | Gm31305       | 1,32 | No  |
| ENSMUSG00000105247 | 3,14E-02  | -3,107617333 | -7,69E-10 | 1,00E+00 | 1,00E+00 | Gm42519       | 1,02 | No  |
| ENSMUSG00000105248 | 1,85E+00  | -3,107657832 | 1,35E+00  | 2,46E-01 | 5,50E-01 | Gm5310        | 3,61 | No  |
| ENSMUSG00000105249 | -4,11E+00 | -2,497427    | 8,58E+00  | 3,40E-03 | 4,20E-02 | Gm44458       | 0,06 | Yes |

|                    |           |              |           |          |          |               |      |    |
|--------------------|-----------|--------------|-----------|----------|----------|---------------|------|----|
| ENSMUSG00000105250 | -8,29E-01 | -2,770641104 | 3,77E-01  | 5,39E-01 | 8,09E-01 | Gm29736       | 0,56 | No |
| ENSMUSG00000105254 | -1,87E+00 | -3,107637761 | 1,39E+00  | 2,38E-01 | 5,50E-01 | Gm42951       | 0,27 | No |
| ENSMUSG00000105255 | 8,62E-02  | 4,631261918  | 1,19E+00  | 2,75E-01 | 5,71E-01 | Gm42413       | 1,06 | No |
| ENSMUSG00000105256 | 1,33E-01  | -2,185648597 | 3,27E-02  | 8,57E-01 | 9,93E-01 | Gm19658       | 1,10 | No |
| ENSMUSG00000105257 | -1,24E+00 | -2,600570387 | 1,48E+00  | 2,24E-01 | 5,50E-01 | Gm43144       | 0,42 | No |
| ENSMUSG00000105259 | 1,65E+00  | -2,711705839 | 1,87E+00  | 1,72E-01 | 5,28E-01 | Gm42874       | 3,14 | No |
| ENSMUSG00000105261 | -1,92E+00 | -3,033623267 | 1,46E+00  | 2,27E-01 | 5,50E-01 | Gm43333       | 0,26 | No |
| ENSMUSG00000105263 | 1,81E-01  | 1,445555986  | 9,71E-01  | 3,24E-01 | 6,25E-01 | Gm42427       | 1,13 | No |
| ENSMUSG00000105264 | -1,90E+00 | -3,033647263 | 1,44E+00  | 2,30E-01 | 5,50E-01 | Gm42716       | 0,27 | No |
| ENSMUSG00000105270 | -3,22E+00 | -2,963202658 | 4,38E+00  | 3,63E-02 | 2,26E-01 | Gm42863       | 0,11 | No |
| ENSMUSG00000105272 | 6,83E-04  | 3,543929647  | 4,70E-05  | 9,95E-01 | 1,00E+00 | Gm43071       | 1,00 | No |
| ENSMUSG00000105275 | -7,89E-03 | -0,91248581  | 3,56E-04  | 9,85E-01 | 1,00E+00 | Gm43214       | 0,99 | No |
| ENSMUSG00000105277 | 2,29E-01  | 0,539190692  | 9,00E-01  | 3,43E-01 | 6,43E-01 | Gm9504        | 1,17 | No |
| ENSMUSG00000105283 | 3,49E-01  | 1,33066122   | 3,33E+00  | 6,80E-02 | 3,28E-01 | Gm33370       | 1,27 | No |
| ENSMUSG00000105285 | 2,57E+00  | -3,0336723   | 2,56E+00  | 1,10E-01 | 4,06E-01 | Gm43238       | 5,96 | No |
| ENSMUSG00000105286 | -8,20E-02 | -2,770626326 | 4,55E-03  | 9,46E-01 | 1,00E+00 | Gm43140       | 0,94 | No |
| ENSMUSG00000105287 | -8,47E-01 | -2,83199325  | 3,94E-01  | 5,30E-01 | 8,05E-01 | Gm43577       | 0,56 | No |
| ENSMUSG00000105288 | -4,50E-01 | -2,107540975 | 3,73E-01  | 5,42E-01 | 8,11E-01 | Gm25820       | 0,73 | No |
| ENSMUSG00000105296 | -2,66E+00 | -2,896116003 | 2,81E+00  | 9,35E-02 | 3,83E-01 | Gm19708       | 0,16 | No |
| ENSMUSG00000105298 | 9,01E-03  | -3,107646452 | -5,16E-10 | 1,00E+00 | 1,00E+00 | Cldn25-ps     | 1,01 | No |
| ENSMUSG00000105300 | 1,81E+00  | -3,10765737  | 1,28E+00  | 2,58E-01 | 5,50E-01 | Gm30613       | 3,49 | No |
| ENSMUSG00000105304 | 8,16E-01  | -0,442668672 | 5,31E+00  | 2,13E-02 | 1,57E-01 | Gm43696       | 1,76 | No |
| ENSMUSG00000105311 | -4,45E-01 | -0,863580848 | 1,23E+00  | 2,68E-01 | 5,64E-01 | Gm44574       | 0,73 | No |
| ENSMUSG00000105312 | -2,17E-02 | -3,07016949  | 1,75E-04  | 9,89E-01 | 1,00E+00 | AL772271.1    | 0,99 | No |
| ENSMUSG00000105322 | 2,61E+00  | -3,033672762 | 2,63E+00  | 1,05E-01 | 3,97E-01 | Gm43751       | 6,10 | No |
| ENSMUSG00000105326 | 2,38E-01  | 0,562879598  | 9,66E-01  | 3,26E-01 | 6,26E-01 | 6030400A10Rik | 1,18 | No |
| ENSMUSG00000105327 | 2,90E+00  | -2,896151196 | 3,34E+00  | 6,77E-02 | 3,28E-01 | Gm9409        | 7,47 | No |
| ENSMUSG00000105328 | -5,57E-02 | -1,770669266 | 7,96E-03  | 9,29E-01 | 1,00E+00 | Gm43180       | 0,96 | No |
| ENSMUSG00000105333 | -6,91E-02 | -1,268179705 | 1,68E-02  | 8,97E-01 | 1,00E+00 | Mir684-2      | 0,95 | No |
| ENSMUSG00000105336 | 1,48E+00  | -2,863710962 | 1,43E+00  | 2,32E-01 | 5,50E-01 | AU022133      | 2,78 | No |
| ENSMUSG00000105337 | 1,87E+00  | -3,107639691 | 1,38E+00  | 2,40E-01 | 5,50E-01 | 1700094M23Rik | 3,67 | No |
| ENSMUSG00000105338 | 1,60E-01  | 3,423544979  | 2,47E+00  | 1,16E-01 | 4,21E-01 | Gm43802       | 1,12 | No |

|                    |           |              |           |          |          |               |      |     |
|--------------------|-----------|--------------|-----------|----------|----------|---------------|------|-----|
| ENSMUSG00000105339 | 1,71E-01  | 3,532431252  | 2,94E+00  | 8,63E-02 | 3,78E-01 | Gm42457       | 1,13 | No  |
| ENSMUSG00000105340 | -5,71E-02 | 4,009961365  | 4,20E-01  | 5,17E-01 | 7,98E-01 | Gm42878       | 0,96 | No  |
| ENSMUSG00000105341 | -3,74E-01 | -1,333209588 | 4,72E-01  | 4,92E-01 | 7,78E-01 | Gm43817       | 0,77 | No  |
| ENSMUSG00000105343 | 1,81E+00  | -3,10765737  | 1,28E+00  | 2,58E-01 | 5,50E-01 | Gm43512       | 3,49 | No  |
| ENSMUSG00000105344 | -1,89E+00 | -3,1076441   | 1,42E+00  | 2,33E-01 | 5,50E-01 | Gm43556       | 0,27 | No  |
| ENSMUSG00000105345 | -1,13E+00 | -2,070135767 | 2,49E+00  | 1,15E-01 | 4,18E-01 | BC030343      | 0,46 | No  |
| ENSMUSG00000105347 | -1,94E+00 | -3,107619243 | 1,50E+00  | 2,21E-01 | 5,50E-01 | Gm43503       | 0,26 | No  |
| ENSMUSG00000105349 | -5,92E-01 | -0,185415378 | 3,21E+00  | 7,32E-02 | 3,44E-01 | Gm43604       | 0,66 | No  |
| ENSMUSG00000105350 | -8,03E-01 | -0,946219591 | 3,76E+00  | 5,23E-02 | 2,79E-01 | 4930537H2ORik | 0,57 | No  |
| ENSMUSG00000105353 | -4,34E-01 | -0,165725629 | 1,78E+00  | 1,82E-01 | 5,44E-01 | Gm42428       | 0,74 | No  |
| ENSMUSG00000105354 | 1,98E-01  | -1,574222468 | 1,34E-01  | 7,14E-01 | 9,12E-01 | D130017N08Rik | 1,15 | No  |
| ENSMUSG00000105355 | 1,36E-01  | 1,497931149  | 5,87E-01  | 4,43E-01 | 7,35E-01 | Gm40117       | 1,10 | No  |
| ENSMUSG00000105356 | -7,67E-01 | 0,817330155  | 1,05E+01  | 1,18E-03 | 1,86E-02 | Gm42603       | 0,59 | Yes |
| ENSMUSG00000105357 | 7,18E-01  | -2,770629895 | 2,81E-01  | 5,96E-01 | 8,44E-01 | Gm42647       | 1,65 | No  |
| ENSMUSG00000105358 | -1,52E+00 | -2,146088608 | 3,33E+00  | 6,79E-02 | 3,28E-01 | Gm43099       | 0,35 | No  |
| ENSMUSG00000105359 | -1,11E-01 | 2,075021962  | 5,88E-01  | 4,43E-01 | 7,35E-01 | Rpl21-ps10    | 0,93 | No  |
| ENSMUSG00000105361 | -5,57E-01 | 8,644913417  | 9,21E+01  | 8,33E-22 | 2,27E-19 | AY036118      | 0,68 | Yes |
| ENSMUSG00000105362 | 1,26E-01  | 1,734523727  | 6,05E-01  | 4,37E-01 | 7,29E-01 | Gm43474       | 1,09 | No  |
| ENSMUSG00000105364 | -2,93E-01 | -2,064274223 | 1,55E-01  | 6,94E-01 | 9,01E-01 | Gm8924        | 0,82 | No  |
| ENSMUSG00000105368 | 1,07E+00  | -0,847999594 | 6,72E+00  | 9,51E-03 | 8,99E-02 | Gm43759       | 2,11 | No  |
| ENSMUSG00000105373 | -8,38E-02 | -1,740963609 | 1,80E-02  | 8,93E-01 | 1,00E+00 | Gm42429       | 0,94 | No  |
| ENSMUSG00000105374 | 2,16E-01  | -1,333180571 | 1,67E-01  | 6,82E-01 | 8,94E-01 | Gm42551       | 1,16 | No  |
| ENSMUSG00000105375 | -3,06E-01 | -1,146174383 | 4,27E-01  | 5,14E-01 | 7,96E-01 | Gm20239       | 0,81 | No  |
| ENSMUSG00000105377 | -7,62E-01 | -1,497693374 | 2,57E+00  | 1,09E-01 | 4,04E-01 | Gm43148       | 0,59 | No  |
| ENSMUSG00000105378 | 1,11E+00  | -2,268053499 | 1,18E+00  | 2,78E-01 | 5,75E-01 | Gm42515       | 2,16 | No  |
| ENSMUSG00000105379 | -2,68E+00 | -2,896127817 | 2,86E+00  | 9,06E-02 | 3,81E-01 | Mir1191b      | 0,16 | No  |
| ENSMUSG00000105382 | -2,60E-01 | 0,071014429  | 8,33E-01  | 3,61E-01 | 6,63E-01 | Gm43339       | 0,83 | No  |
| ENSMUSG00000105383 | -4,43E-02 | 4,81566484   | 3,45E-01  | 5,57E-01 | 8,21E-01 | Gm42641       | 0,97 | No  |
| ENSMUSG00000105388 | -1,98E-01 | 7,299128973  | 1,10E+01  | 9,12E-04 | 1,50E-02 | Rpl36a-ps2    | 0,87 | Yes |
| ENSMUSG00000105389 | 9,01E-03  | -3,107646452 | -5,16E-10 | 1,00E+00 | 1,00E+00 | BB187690      | 1,01 | No  |
| ENSMUSG00000105390 | -1,14E-02 | -3,033635021 | 1,50E-05  | 9,97E-01 | 1,00E+00 | Gm8458        | 0,99 | No  |
| ENSMUSG00000105392 | -5,81E-01 | -2,832014451 | 2,65E-01  | 6,07E-01 | 8,50E-01 | Gm42684       | 0,67 | No  |

|                    |           |              |           |          |          |               |      |     |
|--------------------|-----------|--------------|-----------|----------|----------|---------------|------|-----|
| ENSMUSG00000105395 | -4,26E-02 | -0,117335011 | 1,83E-02  | 8,92E-01 | 1,00E+00 | Gm42672       | 0,97 | No  |
| ENSMUSG00000105397 | 4,96E-02  | 1,006183704  | 5,11E-02  | 8,21E-01 | 9,72E-01 | Gm43471       | 1,03 | No  |
| ENSMUSG00000105398 | -7,55E-01 | 0,002239079  | 5,82E+00  | 1,58E-02 | 1,31E-01 | AC157822.2    | 0,59 | No  |
| ENSMUSG00000105399 | 2,66E-01  | -1,863789927 | 1,84E-01  | 6,68E-01 | 8,87E-01 | Mir1843b      | 1,20 | No  |
| ENSMUSG00000105400 | 1,20E+00  | -3,146123991 | 6,74E-01  | 4,12E-01 | 7,07E-01 | Gm22897       | 2,30 | No  |
| ENSMUSG00000105402 | -7,99E-02 | -2,831951085 | 4,39E-03  | 9,47E-01 | 1,00E+00 | Gm3716        | 0,95 | No  |
| ENSMUSG00000105404 | 1,31E+00  | -2,548319309 | 1,74E+00  | 1,88E-01 | 5,50E-01 | Gm42807       | 2,47 | No  |
| ENSMUSG00000105406 | -9,59E-02 | 0,355188253  | 1,46E-01  | 7,02E-01 | 9,05E-01 | Gm43247       | 0,94 | No  |
| ENSMUSG00000105408 | -4,62E-01 | 1,89662708   | 8,74E+00  | 3,11E-03 | 3,94E-02 | Gm7285        | 0,73 | Yes |
| ENSMUSG00000105410 | 4,42E-01  | -2,711767563 | 1,52E-01  | 6,96E-01 | 9,03E-01 | Gtpbp4-ps7    | 1,36 | No  |
| ENSMUSG00000105412 | -9,51E-01 | -1,627700357 | 2,54E+00  | 1,11E-01 | 4,10E-01 | Gm43768       | 0,52 | No  |
| ENSMUSG00000105415 | 1,38E-01  | 3,875786961  | 2,24E+00  | 1,34E-01 | 4,61E-01 | Gm44364       | 1,10 | No  |
| ENSMUSG00000105416 | 6,88E-01  | -2,355581607 | 6,87E-01  | 4,07E-01 | 7,04E-01 | Gm42553       | 1,61 | No  |
| ENSMUSG00000105418 | 5,99E-01  | -2,963262859 | 1,43E-01  | 7,05E-01 | 9,07E-01 | Gm43650       | 1,51 | No  |
| ENSMUSG00000105419 | -6,65E-01 | -1,289417812 | 1,77E+00  | 1,83E-01 | 5,46E-01 | Gm43205       | 0,63 | No  |
| ENSMUSG00000105420 | 3,14E-02  | -3,107617333 | -7,69E-10 | 1,00E+00 | 1,00E+00 | Gm44374       | 1,02 | No  |
| ENSMUSG00000105421 | 3,14E-02  | -3,107617333 | -7,69E-10 | 1,00E+00 | 1,00E+00 | 5830411K02Rik | 1,02 | No  |
| ENSMUSG00000105422 | 1,85E+00  | -3,107657832 | 1,35E+00  | 2,46E-01 | 5,50E-01 | Gm6089        | 3,61 | No  |
| ENSMUSG00000105428 | -1,91E-01 | -1,907056981 | 7,66E-02  | 7,82E-01 | 9,50E-01 | Mir3068       | 0,88 | No  |
| ENSMUSG00000105429 | 8,72E-01  | -0,98053619  | 4,12E+00  | 4,24E-02 | 2,45E-01 | Gm43692       | 1,83 | No  |
| ENSMUSG00000105433 | -4,82E-01 | -2,17555299  | 3,52E-01  | 5,53E-01 | 8,19E-01 | Gm44486       | 0,72 | No  |
| ENSMUSG00000105434 | -3,59E-01 | 0,324511643  | 1,80E+00  | 1,80E-01 | 5,42E-01 | Gm43359       | 0,78 | No  |
| ENSMUSG00000105437 | -7,26E-01 | -2,448624825 | 5,90E-01  | 4,42E-01 | 7,34E-01 | Gm42450       | 0,60 | No  |
| ENSMUSG00000105439 | 1,85E+00  | -2,963247546 | 1,34E+00  | 2,48E-01 | 5,50E-01 | A230098N10Rik | 3,59 | No  |
| ENSMUSG00000105441 | 1,86E+00  | -2,896125762 | 1,35E+00  | 2,46E-01 | 5,50E-01 | Gm8041        | 3,63 | No  |
| ENSMUSG00000105442 | 4,24E-02  | -3,033592245 | -1,17E-09 | 1,00E+00 | 1,00E+00 | Gm42614       | 1,03 | No  |
| ENSMUSG00000105445 | -1,87E+00 | -3,107637761 | 1,39E+00  | 2,38E-01 | 5,50E-01 | Gm42972       | 0,27 | No  |
| ENSMUSG00000105446 | 1,35E+00  | -2,311169745 | 1,88E+00  | 1,71E-01 | 5,26E-01 | Gm42605       | 2,56 | No  |
| ENSMUSG00000105447 | 3,65E-01  | 1,074624334  | 3,41E+00  | 6,49E-02 | 3,19E-01 | Gm43653       | 1,29 | No  |
| ENSMUSG00000105448 | -4,50E-01 | -2,107540975 | 3,73E-01  | 5,42E-01 | 8,11E-01 | Gm25820       | 0,73 | No  |
| ENSMUSG00000105449 | -2,51E-01 | 1,130282438  | 1,63E+00  | 2,02E-01 | 5,50E-01 | Gm43379       | 0,84 | No  |
| ENSMUSG00000105452 | 1,40E-01  | 4,968446958  | 3,54E+00  | 6,00E-02 | 3,03E-01 | Gm5276        | 1,10 | No  |

|                    |           |              |           |          |          |               |      |     |
|--------------------|-----------|--------------|-----------|----------|----------|---------------|------|-----|
| ENSMUSG00000105453 | 1,20E+00  | -1,448769942 | 4,62E+00  | 3,16E-02 | 2,06E-01 | Gm43702       | 2,31 | No  |
| ENSMUSG00000105454 | -1,94E+00 | -3,107619243 | 1,50E+00  | 2,21E-01 | 5,50E-01 | Gm43830       | 0,26 | No  |
| ENSMUSG00000105457 | -4,37E-01 | -0,655093529 | 1,41E+00  | 2,35E-01 | 5,50E-01 | Gm43200       | 0,74 | No  |
| ENSMUSG00000105458 | 7,08E-01  | -1,157517702 | 2,66E+00  | 1,03E-01 | 3,95E-01 | Mir3074-2     | 1,63 | No  |
| ENSMUSG00000105459 | 5,96E-01  | -2,998035473 | 1,42E-01  | 7,07E-01 | 9,08E-01 | 4930449I04Rik | 1,51 | No  |
| ENSMUSG00000105460 | -3,03E-01 | 0,979735731  | 2,18E+00  | 1,40E-01 | 4,73E-01 | Gm42671       | 0,81 | No  |
| ENSMUSG00000105461 | -1,36E-01 | 4,064732964  | 2,36E+00  | 1,24E-01 | 4,41E-01 | Gm4742        | 0,91 | No  |
| ENSMUSG00000105465 | -3,18E-01 | -1,051804083 | 4,38E-01  | 5,08E-01 | 7,92E-01 | Gm44325       | 0,80 | No  |
| ENSMUSG00000105466 | 1,79E-01  | -0,11721112  | 3,06E-01  | 5,80E-01 | 8,37E-01 | Gm42998       | 1,13 | No  |
| ENSMUSG00000105471 | -3,60E-01 | -1,38977557  | 4,68E-01  | 4,94E-01 | 7,80E-01 | A430073D23Rik | 0,78 | No  |
| ENSMUSG00000105472 | 5,39E-01  | -1,185660569 | 1,33E+00  | 2,49E-01 | 5,50E-01 | Gm43024       | 1,45 | No  |
| ENSMUSG00000105474 | -1,20E+00 | -1,600510482 | 4,40E+00  | 3,59E-02 | 2,25E-01 | Gm20159       | 0,44 | No  |
| ENSMUSG00000105477 | -9,11E-01 | -3,159433134 | 4,59E-01  | 4,98E-01 | 7,83E-01 | AC151286.1    | 0,53 | No  |
| ENSMUSG00000105478 | 3,14E-02  | -3,107617333 | -7,69E-10 | 1,00E+00 | 1,00E+00 | Gm43285       | 1,02 | No  |
| ENSMUSG00000105479 | -1,94E+00 | -3,107619243 | 1,50E+00  | 2,21E-01 | 5,50E-01 | Gm43132       | 0,26 | No  |
| ENSMUSG00000105482 | 4,05E-01  | 1,058045972  | 3,97E+00  | 4,64E-02 | 2,57E-01 | Gm42596       | 1,32 | No  |
| ENSMUSG00000105486 | -7,20E-02 | -1,740828886 | 1,33E-02  | 9,08E-01 | 1,00E+00 | Gm3372        | 0,95 | No  |
| ENSMUSG00000105497 | 4,16E-01  | -2,87404094  | 1,03E-01  | 7,49E-01 | 9,31E-01 | Mir191        | 1,33 | No  |
| ENSMUSG00000105501 | -2,67E+00 | -2,831966654 | 2,83E+00  | 9,22E-02 | 3,82E-01 | 5330426L24Rik | 0,16 | No  |
| ENSMUSG00000105503 | -1,39E+00 | -2,185490575 | 2,67E+00  | 1,03E-01 | 3,95E-01 | Gm42982       | 0,38 | No  |
| ENSMUSG00000105504 | -4,78E-01 | 5,999767927  | 5,46E+01  | 1,47E-13 | 1,99E-11 | Gbp5          | 0,72 | Yes |
| ENSMUSG00000105506 | 7,35E-01  | -2,896169732 | 2,94E-01  | 5,88E-01 | 8,40E-01 | Gm43743       | 1,66 | No  |
| ENSMUSG00000105509 | 3,90E-03  | 2,994724778  | 1,18E-03  | 9,73E-01 | 1,00E+00 | C130013H08Rik | 1,00 | No  |
| ENSMUSG00000105510 | 4,14E-01  | -1,740797371 | 5,13E-01  | 4,74E-01 | 7,62E-01 | Gm43815       | 1,33 | No  |
| ENSMUSG00000105512 | -9,35E-02 | 0,47737545   | 1,40E-01  | 7,08E-01 | 9,09E-01 | Gm43714       | 0,94 | No  |
| ENSMUSG00000105514 | -1,95E-01 | 0,334564131  | 5,78E-01  | 4,47E-01 | 7,38E-01 | Gm42913       | 0,87 | No  |
| ENSMUSG00000105516 | -1,87E+00 | -3,107637761 | 1,39E+00  | 2,38E-01 | 5,50E-01 | Gm36823       | 0,27 | No  |
| ENSMUSG00000105517 | -4,21E-01 | -0,726063889 | 1,21E+00  | 2,72E-01 | 5,68E-01 | Gm42436       | 0,75 | No  |
| ENSMUSG00000105518 | -1,03E-01 | 8,104813989  | 3,14E+00  | 7,62E-02 | 3,52E-01 | Gm42674       | 0,93 | No  |
| ENSMUSG00000105519 | -8,85E-01 | -0,21601957  | 6,24E+00  | 1,25E-02 | 1,10E-01 | E430021H15Rik | 0,54 | No  |
| ENSMUSG00000105522 | -4,66E-01 | -1,800968644 | 5,77E-01  | 4,47E-01 | 7,38E-01 | Gm15235       | 0,72 | No  |
| ENSMUSG00000105524 | 6,16E-01  | -3,03366067  | 1,51E-01  | 6,97E-01 | 9,03E-01 | Mir3065       | 1,53 | No  |



|                    |           |              |           |          |          |            |  |      |     |
|--------------------|-----------|--------------|-----------|----------|----------|------------|--|------|-----|
| ENSMUSG00000105529 | 1,81E+00  | -3,10765737  | 1,28E+00  | 2,58E-01 | 5,50E-01 | Gm9480     |  | 3,49 | No  |
| ENSMUSG00000105534 | -7,22E-01 | -2,226272678 | 8,87E-01  | 3,46E-01 | 6,47E-01 | Gm42435    |  | 0,61 | No  |
| ENSMUSG00000105535 | -1,94E+00 | -3,107619243 | 1,50E+00  | 2,21E-01 | 5,50E-01 | Gm43077    |  | 0,26 | No  |
| ENSMUSG00000105536 | -1,87E+00 | -3,033619006 | 1,41E+00  | 2,36E-01 | 5,50E-01 | Gm4959     |  | 0,27 | No  |
| ENSMUSG00000105537 | 3,93E-01  | -0,454835018 | 1,22E+00  | 2,69E-01 | 5,65E-01 | AL954388.1 |  | 1,31 | No  |
| ENSMUSG00000105540 | -2,95E-01 | -1,627705423 | 2,85E-01  | 5,93E-01 | 8,43E-01 | Gm7988     |  | 0,81 | No  |
| ENSMUSG00000105541 | 1,32E-01  | -1,879852093 | 4,75E-02  | 8,27E-01 | 9,76E-01 | Gm43136    |  | 1,10 | No  |
| ENSMUSG00000105542 | -9,03E-01 | -1,246940833 | 3,03E+00  | 8,19E-02 | 3,68E-01 | Gm34248    |  | 0,53 | No  |
| ENSMUSG00000105547 | -4,14E+00 | -2,627582571 | 8,74E+00  | 3,12E-03 | 3,95E-02 | Iglc3      |  | 0,06 | Yes |
| ENSMUSG00000105549 | 2,13E+00  | -2,497589159 | 3,64E+00  | 5,64E-02 | 2,92E-01 | Gm43540    |  | 4,39 | No  |
| ENSMUSG00000105550 | -2,98E-01 | -1,510087624 | 3,36E-01  | 5,62E-01 | 8,25E-01 | Gm35585    |  | 0,81 | No  |
| ENSMUSG00000105552 | 1,51E-01  | 3,893148415  | 2,73E+00  | 9,84E-02 | 3,91E-01 | Gm19710    |  | 1,11 | No  |
| ENSMUSG00000105553 | -2,68E+00 | -2,831941819 | 2,86E+00  | 9,07E-02 | 3,82E-01 | Gm42514    |  | 0,16 | No  |
| ENSMUSG00000105554 | 3,17E+00  | -2,896124898 | 4,11E+00  | 4,25E-02 | 2,45E-01 | Gm7118     |  | 9,03 | No  |
| ENSMUSG00000105555 | -3,88E-03 | -3,03362684  | 4,02E-12  | 1,00E+00 | 1,00E+00 | Gm43856    |  | 1,00 | No  |
| ENSMUSG00000105556 | 5,23E-01  | 0,095527274  | 3,23E+00  | 7,24E-02 | 3,41E-01 | Gm43080    |  | 1,44 | No  |
| ENSMUSG00000105558 | -1,26E-01 | 1,302822782  | 4,34E-01  | 5,10E-01 | 7,93E-01 | Gm5855     |  | 0,92 | No  |
| ENSMUSG00000105559 | 1,19E-01  | 0,206623196  | 1,93E-01  | 6,60E-01 | 8,82E-01 | Gm4860     |  | 1,09 | No  |
| ENSMUSG00000105560 | -3,83E-02 | -3,107651936 | -7,91E-11 | 1,00E+00 | 1,00E+00 | Gm42744    |  | 0,97 | No  |
| ENSMUSG00000105561 | 2,70E-01  | 0,913741093  | 1,50E+00  | 2,20E-01 | 5,50E-01 | Gm43462    |  | 1,21 | No  |
| ENSMUSG00000105563 | -7,23E-01 | -2,963270729 | 2,09E-01  | 6,48E-01 | 8,75E-01 | Gm44408    |  | 0,61 | No  |
| ENSMUSG00000105564 | 3,07E-01  | -0,871896934 | 5,78E-01  | 4,47E-01 | 7,38E-01 | Gm8891     |  | 1,24 | No  |
| ENSMUSG00000105565 | -2,18E-01 | -1,800882785 | 1,05E-01  | 7,46E-01 | 9,29E-01 | Gm43566    |  | 0,86 | No  |
| ENSMUSG00000105569 | 8,58E-01  | -2,771220837 | 5,30E-01  | 4,67E-01 | 7,55E-01 | Gm44450    |  | 1,81 | No  |
| ENSMUSG00000105570 | -9,96E-01 | -2,770566033 | 8,73E-01  | 3,50E-01 | 6,51E-01 | Gm42682    |  | 0,50 | No  |
| ENSMUSG00000105572 | -1,83E-01 | 3,143860037  | 2,73E+00  | 9,82E-02 | 3,91E-01 | Gm43300    |  | 0,88 | No  |
| ENSMUSG00000105578 | 1,87E+00  | -3,107639691 | 1,38E+00  | 2,40E-01 | 5,50E-01 | Gm43663    |  | 3,67 | No  |
| ENSMUSG00000105580 | -4,81E-01 | -2,874655315 | 1,17E-01  | 7,32E-01 | 9,23E-01 | Gm44454    |  | 0,72 | No  |
| ENSMUSG00000105583 | 1,23E+00  | -3,107628512 | 6,90E-01  | 4,06E-01 | 7,02E-01 | Gm43777    |  | 2,35 | No  |
| ENSMUSG00000105585 | 1,22E+00  | -3,146114919 | 6,90E-01  | 4,06E-01 | 7,02E-01 | Mir30f     |  | 2,33 | No  |
| ENSMUSG00000105586 | 3,18E-01  | -2,448650966 | 1,03E-01  | 7,49E-01 | 9,30E-01 | Gm43009    |  | 1,25 | No  |
| ENSMUSG00000105590 | -2,73E-02 | -2,963256629 | 3,40E-04  | 9,85E-01 | 1,00E+00 | Gm43364    |  | 0,98 | No  |

|                    |           |              |           |          |          |               |      |    |
|--------------------|-----------|--------------|-----------|----------|----------|---------------|------|----|
| ENSMUSG00000105594 | 5,16E-01  | -2,464659014 | 3,66E-01  | 5,45E-01 | 8,13E-01 | Gm43398       | 1,43 | No |
| ENSMUSG00000105595 | -7,48E-02 | -2,548158001 | 3,70E-03  | 9,51E-01 | 1,00E+00 | Gm23011       | 0,95 | No |
| ENSMUSG00000105597 | 3,37E-01  | -1,185729749 | 4,86E-01  | 4,86E-01 | 7,73E-01 | 4633401B06Rik | 1,26 | No |
| ENSMUSG00000105599 | -6,94E-02 | -1,655123421 | 1,35E-02  | 9,08E-01 | 1,00E+00 | Gm9238        | 0,95 | No |
| ENSMUSG00000105600 | 2,41E-02  | 4,685336591  | 9,71E-02  | 7,55E-01 | 9,34E-01 | Gm5987        | 1,02 | No |
| ENSMUSG00000105601 | 2,08E-01  | -1,963281885 | 9,97E-02  | 7,52E-01 | 9,32E-01 | Gm42725       | 1,16 | No |
| ENSMUSG00000105602 | -1,89E+00 | -3,1076441   | 1,42E+00  | 2,33E-01 | 5,50E-01 | Gm10636       | 0,27 | No |
| ENSMUSG00000105604 | 4,19E-02  | 0,454959217  | 2,91E-02  | 8,65E-01 | 9,98E-01 | Gm42838       | 1,03 | No |
| ENSMUSG00000105606 | 1,81E+00  | -3,10765737  | 1,28E+00  | 2,58E-01 | 5,50E-01 | Igkv2-109     | 3,49 | No |
| ENSMUSG00000105607 | -6,19E-02 | -0,366877301 | 3,29E-02  | 8,56E-01 | 9,93E-01 | Gm43513       | 0,96 | No |
| ENSMUSG00000105609 | -4,27E-03 | 1,3361289    | 5,26E-04  | 9,82E-01 | 1,00E+00 | Gm42501       | 1,00 | No |
| ENSMUSG00000105610 | 4,19E-02  | 0,193282422  | 2,25E-02  | 8,81E-01 | 1,00E+00 | AC125099.1    | 1,03 | No |
| ENSMUSG00000105611 | -1,87E+00 | -3,107637761 | 1,39E+00  | 2,38E-01 | 5,50E-01 | Gm42938       | 0,27 | No |
| ENSMUSG00000105613 | -7,26E-01 | -0,528765912 | 3,75E+00  | 5,28E-02 | 2,80E-01 | Gm43684       | 0,60 | No |
| ENSMUSG00000105614 | 1,82E+00  | -2,963253027 | 1,31E+00  | 2,52E-01 | 5,50E-01 | Dnd1-ps       | 3,53 | No |
| ENSMUSG00000105617 | -1,07E-01 | 2,342076932  | 6,25E-01  | 4,29E-01 | 7,23E-01 | Gm43809       | 0,93 | No |
| ENSMUSG00000105621 | -9,45E-01 | -3,159427022 | 4,94E-01  | 4,82E-01 | 7,69E-01 | Mirlet7f-1    | 0,52 | No |
| ENSMUSG00000105622 | 9,01E-03  | -3,107646452 | -5,16E-10 | 1,00E+00 | 1,00E+00 | Gm42615       | 1,01 | No |
| ENSMUSG00000105624 | 1,21E-02  | -3,033650469 | 7,34E-11  | 1,00E+00 | 1,00E+00 | Gm43187       | 1,01 | No |
| ENSMUSG00000105625 | 7,03E-01  | -2,600663947 | 2,71E-01  | 6,03E-01 | 8,48E-01 | Gm31230       | 1,63 | No |
| ENSMUSG00000105628 | 1,85E+00  | -2,963264462 | 1,34E+00  | 2,48E-01 | 5,50E-01 | Gm43350       | 3,59 | No |
| ENSMUSG00000105632 | 4,54E-01  | 0,191363013  | 2,71E+00  | 9,98E-02 | 3,92E-01 | Gm43272       | 1,37 | No |
| ENSMUSG00000105633 | -1,23E+00 | -3,146117124 | 7,12E-01  | 3,99E-01 | 6,98E-01 | Gm32158       | 0,42 | No |
| ENSMUSG00000105636 | -8,65E-01 | -0,060993689 | 7,94E+00  | 4,85E-03 | 5,47E-02 | Gm43625       | 0,55 | No |
| ENSMUSG00000105639 | -1,89E+00 | -3,1076441   | 1,42E+00  | 2,33E-01 | 5,50E-01 | Gm42516       | 0,27 | No |
| ENSMUSG00000105641 | 1,09E-01  | 0,997713309  | 2,71E-01  | 6,03E-01 | 8,48E-01 | Gm5853        | 1,08 | No |
| ENSMUSG00000105643 | 4,80E-01  | -0,226154495 | 2,12E+00  | 1,45E-01 | 4,83E-01 | Gm42611       | 1,39 | No |
| ENSMUSG00000105644 | -5,32E-01 | 1,05670591   | 6,84E+00  | 8,91E-03 | 8,57E-02 | Gm19739       | 0,69 | No |
| ENSMUSG00000105645 | 3,36E-02  | 2,595540961  | 7,21E-02  | 7,88E-01 | 9,53E-01 | Gm6649        | 1,02 | No |
| ENSMUSG00000105646 | 3,14E-02  | -3,107617333 | -7,69E-10 | 1,00E+00 | 1,00E+00 | Gm30211       | 1,02 | No |
| ENSMUSG00000105647 | 2,17E-01  | 1,836359366  | 1,84E+00  | 1,75E-01 | 5,33E-01 | Gm43695       | 1,16 | No |
| ENSMUSG00000105649 | 3,20E-01  | -2,497556823 | 1,04E-01  | 7,47E-01 | 9,30E-01 | Gm43494       | 1,25 | No |

|                    |           |              |          |          |          |               |      |     |
|--------------------|-----------|--------------|----------|----------|----------|---------------|------|-----|
| ENSMUSG00000105650 | 6,09E-01  | -2,99800632  | 1,48E-01 | 7,00E-01 | 9,05E-01 | Gm42889       | 1,53 | No  |
| ENSMUSG00000105651 | -1,87E+00 | -3,107637761 | 1,39E+00 | 2,38E-01 | 5,50E-01 | 1700017M07Rik | 0,27 | No  |
| ENSMUSG00000105654 | -5,39E-02 | -2,35556779  | 2,02E-03 | 9,64E-01 | 1,00E+00 | Gm29704       | 0,96 | No  |
| ENSMUSG00000105655 | -4,83E-02 | 3,146484531  | 1,88E-01 | 6,64E-01 | 8,84E-01 | Gm42659       | 0,97 | No  |
| ENSMUSG00000105656 | -3,17E+00 | -2,831927658 | 4,23E+00 | 3,97E-02 | 2,36E-01 | Gm43017       | 0,11 | No  |
| ENSMUSG00000105659 | 1,08E+00  | -2,226244915 | 1,48E+00 | 2,23E-01 | 5,50E-01 | 4930509H03Rik | 2,11 | No  |
| ENSMUSG00000105660 | 1,11E+00  | -2,226283306 | 1,17E+00 | 2,80E-01 | 5,76E-01 | Gm42975       | 2,16 | No  |
| ENSMUSG00000105664 | 4,41E-01  | -2,831973884 | 1,52E-01 | 6,97E-01 | 9,03E-01 | Gm42797       | 1,36 | No  |
| ENSMUSG00000105666 | -3,02E-01 | 0,705320472  | 1,86E+00 | 1,73E-01 | 5,29E-01 | Gm18711       | 0,81 | No  |
| ENSMUSG00000105671 | 2,62E+00  | -3,033672992 | 2,66E+00 | 1,03E-01 | 3,95E-01 | Gm31306       | 6,16 | No  |
| ENSMUSG00000105674 | -5,80E-01 | -1,863729933 | 7,36E-01 | 3,91E-01 | 6,91E-01 | Gm42437       | 0,67 | No  |
| ENSMUSG00000105676 | 1,55E+00  | -2,033729945 | 4,58E+00 | 3,23E-02 | 2,09E-01 | Gm43403       | 2,93 | No  |
| ENSMUSG00000105677 | -3,78E-02 | 2,701631856  | 9,55E-02 | 7,57E-01 | 9,35E-01 | Gm43328       | 0,97 | No  |
| ENSMUSG00000105679 | 7,41E-01  | -2,506126803 | 6,37E-01 | 4,25E-01 | 7,19E-01 | Gm43338       | 1,67 | No  |
| ENSMUSG00000105681 | -9,66E-01 | -2,548177163 | 1,13E+00 | 2,88E-01 | 5,84E-01 | Gm43428       | 0,51 | No  |
| ENSMUSG00000105683 | -1,89E+00 | -3,033648118 | 1,42E+00 | 2,33E-01 | 5,50E-01 | Gm43487       | 0,27 | No  |
| ENSMUSG00000105686 | -6,76E-02 | -2,896116699 | 2,02E-03 | 9,64E-01 | 1,00E+00 | Gm35394       | 0,95 | No  |
| ENSMUSG00000105687 | 4,61E-01  | 2,600611798  | 1,32E+01 | 2,77E-04 | 5,69E-03 | Gm6157        | 1,38 | Yes |
| ENSMUSG00000105690 | -1,37E+00 | -1,785633929 | 4,00E+00 | 4,54E-02 | 2,54E-01 | Gm26265       | 0,39 | No  |
| ENSMUSG00000105691 | -2,23E-01 | -0,205807855 | 4,39E-01 | 5,08E-01 | 7,92E-01 | Gm42876       | 0,86 | No  |
| ENSMUSG00000105692 | 6,93E-02  | 3,963377054  | 5,98E-01 | 4,39E-01 | 7,32E-01 | Gm43737       | 1,05 | No  |
| ENSMUSG00000105694 | -4,76E-01 | -1,600681979 | 6,70E-01 | 4,13E-01 | 7,09E-01 | Gm43237       | 0,72 | No  |
| ENSMUSG00000105698 | 1,86E+00  | -3,033661846 | 1,35E+00 | 2,46E-01 | 5,50E-01 | Gm31881       | 3,62 | No  |
| ENSMUSG00000105699 | 1,38E-01  | -0,57433933  | 1,43E-01 | 7,06E-01 | 9,07E-01 | Gm43703       | 1,10 | No  |
| ENSMUSG00000105701 | -6,79E-01 | -1,726168026 | 1,19E+00 | 2,76E-01 | 5,73E-01 | Gm42587       | 0,62 | No  |
| ENSMUSG00000105703 | -2,43E-01 | 5,157599829  | 1,14E+01 | 7,22E-04 | 1,24E-02 | Gm43305       | 0,84 | Yes |
| ENSMUSG00000105704 | -1,34E-01 | 2,977876067  | 1,35E+00 | 2,45E-01 | 5,50E-01 | Gm43055       | 0,91 | No  |
| ENSMUSG00000105705 | 1,22E-01  | 1,066447092  | 3,50E-01 | 5,54E-01 | 8,20E-01 | AC174780.1    | 1,09 | No  |
| ENSMUSG00000105706 | 7,94E-02  | 0,251787167  | 8,37E-02 | 7,72E-01 | 9,43E-01 | Gm42855       | 1,06 | No  |
| ENSMUSG00000105707 | -9,10E-01 | -2,448534631 | 7,27E-01 | 3,94E-01 | 6,94E-01 | Gm43753       | 0,53 | No  |
| ENSMUSG00000105710 | -1,07E-01 | 1,178649047  | 3,00E-01 | 5,84E-01 | 8,38E-01 | Gm43859       | 0,93 | No  |
| ENSMUSG00000105713 | 1,87E+00  | -3,107639691 | 1,38E+00 | 2,40E-01 | 5,50E-01 | Gm43827       | 3,67 | No  |

|                    |           |              |           |          |          |               |      |    |
|--------------------|-----------|--------------|-----------|----------|----------|---------------|------|----|
| ENSMUSG00000105714 | -8,80E-01 | -2,896143216 | 4,26E-01  | 5,14E-01 | 7,96E-01 | Gm43380       | 0,54 | No |
| ENSMUSG00000105717 | 1,87E+00  | -3,03364371  | 1,36E+00  | 2,43E-01 | 5,50E-01 | Gm43465       | 3,66 | No |
| ENSMUSG00000105719 | 7,62E-01  | -1,247158819 | 1,95E+00  | 1,62E-01 | 5,12E-01 | Gm42872       | 1,70 | No |
| ENSMUSG00000105721 | 9,01E-03  | -3,107646452 | -5,16E-10 | 1,00E+00 | 1,00E+00 | C920008G01Rik | 1,01 | No |
| ENSMUSG00000105722 | 2,74E-02  | -3,033621357 | 9,16E-12  | 1,00E+00 | 1,00E+00 | Gm18187       | 1,02 | No |
| ENSMUSG00000105726 | 1,87E+00  | -3,107639691 | 1,38E+00  | 2,40E-01 | 5,50E-01 | Gm42443       | 3,67 | No |
| ENSMUSG00000105728 | -3,70E-01 | -0,963340306 | 6,37E-01  | 4,25E-01 | 7,19E-01 | Gm42819       | 0,77 | No |
| ENSMUSG00000105730 | -1,92E+00 | -3,0336536   | 1,46E+00  | 2,27E-01 | 5,50E-01 | Gm43838       | 0,26 | No |
| ENSMUSG00000105731 | -2,66E+00 | -2,311174804 | 6,48E+00  | 1,09E-02 | 9,95E-02 | Gm43063       | 0,16 | No |
| ENSMUSG00000105733 | -3,88E-03 | -3,03362684  | 4,02E-12  | 1,00E+00 | 1,00E+00 | Gm42973       | 1,00 | No |
| ENSMUSG00000105735 | 1,81E+00  | -3,10765737  | 1,28E+00  | 2,58E-01 | 5,50E-01 | 4933415J04Rik | 3,49 | No |
| ENSMUSG00000105741 | 2,74E-01  | -0,436687937 | 5,88E-01  | 4,43E-01 | 7,35E-01 | C79130        | 1,21 | No |
| ENSMUSG00000105742 | -2,66E-01 | 0,989016005  | 1,64E+00  | 2,00E-01 | 5,50E-01 | Gm42748       | 0,83 | No |
| ENSMUSG00000105743 | 4,36E-01  | -2,543571972 | 2,24E-01  | 6,36E-01 | 8,67E-01 | Mir1949       | 1,35 | No |
| ENSMUSG00000105745 | -5,88E-01 | -2,37827604  | 3,71E-01  | 5,42E-01 | 8,12E-01 | Gm42521       | 0,67 | No |
| ENSMUSG00000105746 | -8,78E-01 | -1,980468955 | 1,87E+00  | 1,72E-01 | 5,28E-01 | Gm43595       | 0,54 | No |
| ENSMUSG00000105748 | 2,24E-01  | 2,30139645   | 2,67E+00  | 1,02E-01 | 3,94E-01 | Gm43088       | 1,17 | No |
| ENSMUSG00000105755 | -2,52E-01 | -2,311209863 | 6,88E-02  | 7,93E-01 | 9,56E-01 | Gm43514       | 0,84 | No |
| ENSMUSG00000105758 | -6,99E-01 | -3,070161788 | 1,96E-01  | 6,58E-01 | 8,81E-01 | Mirlet7e      | 0,62 | No |
| ENSMUSG00000105761 | -2,29E+00 | -2,268090981 | 4,27E+00  | 3,87E-02 | 2,33E-01 | Gm43787       | 0,20 | No |
| ENSMUSG00000105769 | 5,92E-02  | 1,323926172  | 9,95E-02  | 7,52E-01 | 9,32E-01 | Gm43351       | 1,04 | No |
| ENSMUSG00000105770 | -6,92E-01 | -2,963232606 | 1,93E-01  | 6,61E-01 | 8,82E-01 | Mir664        | 0,62 | No |
| ENSMUSG00000105774 | -3,88E-03 | -3,03362684  | 4,02E-12  | 1,00E+00 | 1,00E+00 | Gm43006       | 1,00 | No |
| ENSMUSG00000105775 | 3,17E-01  | -0,190751254 | 1,00E+00  | 3,16E-01 | 6,16E-01 | Gm10290       | 1,25 | No |
| ENSMUSG00000105776 | 8,66E-02  | 2,012075477  | 3,49E-01  | 5,55E-01 | 8,20E-01 | Gm43292       | 1,06 | No |
| ENSMUSG00000105779 | 1,44E-01  | 3,32735253   | 1,94E+00  | 1,63E-01 | 5,14E-01 | Gm6439        | 1,11 | No |
| ENSMUSG00000105780 | 1,21E-02  | -1,287453335 | 6,33E-04  | 9,80E-01 | 1,00E+00 | Snord80       | 1,01 | No |
| ENSMUSG00000105785 | -1,07E-01 | 0,809181939  | 2,24E-01  | 6,36E-01 | 8,67E-01 | Gm42526       | 0,93 | No |
| ENSMUSG00000105787 | -1,69E-01 | 3,900554482  | 3,48E+00  | 6,20E-02 | 3,10E-01 | Gm8099        | 0,89 | No |
| ENSMUSG00000105788 | -8,45E-01 | -0,909727333 | 3,43E+00  | 6,39E-02 | 3,16E-01 | AC099934.1    | 0,56 | No |
| ENSMUSG00000105789 | -3,48E-02 | -2,770623913 | 9,97E-04  | 9,75E-01 | 1,00E+00 | Gm42997       | 0,98 | No |
| ENSMUSG00000105793 | -1,92E+00 | -3,033623267 | 1,46E+00  | 2,27E-01 | 5,50E-01 | Gm17956       | 0,26 | No |

|                    |           |              |          |          |          |               |      |    |
|--------------------|-----------|--------------|----------|----------|----------|---------------|------|----|
| ENSMUSG00000105796 | -9,66E-01 | -0,600447285 | 6,76E+00 | 9,30E-03 | 8,84E-02 | Gm42845       | 0,51 | No |
| ENSMUSG00000105797 | -3,67E-01 | -1,929380756 | 3,12E-01 | 5,77E-01 | 8,35E-01 | Gm5149        | 0,78 | No |
| ENSMUSG00000105798 | -1,35E+00 | -2,896117489 | 1,14E+00 | 2,85E-01 | 5,82E-01 | Gm18982       | 0,39 | No |
| ENSMUSG00000105801 | -1,20E+00 | -1,497417239 | 3,93E+00 | 4,73E-02 | 2,60E-01 | C430019N01Rik | 0,43 | No |
| ENSMUSG00000105802 | -3,69E-01 | -2,401433563 | 1,72E-01 | 6,79E-01 | 8,93E-01 | Gm43012       | 0,77 | No |
| ENSMUSG00000105804 | 2,54E-01  | 1,141918369  | 1,60E+00 | 2,06E-01 | 5,50E-01 | Gm43654       | 1,19 | No |
| ENSMUSG00000105805 | -1,23E+00 | -3,146117124 | 7,12E-01 | 3,99E-01 | 6,98E-01 | Gm44498       | 0,42 | No |
| ENSMUSG00000105808 | 4,86E-02  | -1,770654122 | 6,89E-03 | 9,34E-01 | 1,00E+00 | Gm42627       | 1,03 | No |
| ENSMUSG00000105810 | -8,42E-02 | 1,658751959  | 2,53E-01 | 6,15E-01 | 8,54E-01 | Gm43435       | 0,94 | No |
| ENSMUSG00000105813 | -3,43E-01 | -1,785740131 | 3,00E-01 | 5,84E-01 | 8,38E-01 | Gm42928       | 0,79 | No |
| ENSMUSG00000105814 | -4,65E-02 | 2,751840749  | 1,48E-01 | 7,00E-01 | 9,05E-01 | Mir703        | 0,97 | No |
| ENSMUSG00000105815 | -8,42E-01 | -2,896161952 | 3,88E-01 | 5,33E-01 | 8,06E-01 | Gm43541       | 0,56 | No |
| ENSMUSG00000105818 | 6,95E-01  | -2,770635765 | 2,64E-01 | 6,07E-01 | 8,50E-01 | Gm43256       | 1,62 | No |
| ENSMUSG00000105822 | 1,87E+00  | -3,03364371  | 1,36E+00 | 2,43E-01 | 5,50E-01 | Gm42969       | 3,66 | No |
| ENSMUSG00000105824 | 5,18E-01  | -1,366934592 | 1,15E+00 | 2,84E-01 | 5,80E-01 | Gm43466       | 1,43 | No |
| ENSMUSG00000105826 | 6,25E-02  | 0,598754616  | 7,01E-02 | 7,91E-01 | 9,55E-01 | Gm42141       | 1,04 | No |
| ENSMUSG00000105827 | -2,18E+00 | -2,963231902 | 2,24E+00 | 1,34E-01 | 4,61E-01 | Hist2h2bb     | 0,22 | No |
| ENSMUSG00000105828 | 1,87E+00  | -3,107639691 | 1,38E+00 | 2,40E-01 | 5,50E-01 | Gm43048       | 3,67 | No |
| ENSMUSG00000105833 | 1,71E-01  | 2,590777108  | 1,81E+00 | 1,79E-01 | 5,40E-01 | Gm4751        | 1,13 | No |
| ENSMUSG00000105834 | 7,56E-01  | -2,963268003 | 3,13E-01 | 5,76E-01 | 8,34E-01 | 4930592C13Rik | 1,69 | No |
| ENSMUSG00000105835 | -1,75E-01 | 2,492149529  | 1,81E+00 | 1,78E-01 | 5,39E-01 | Gm43552       | 0,89 | No |
| ENSMUSG00000105836 | 1,86E+00  | -3,033661846 | 1,35E+00 | 2,46E-01 | 5,50E-01 | Gm17954       | 3,62 | No |
| ENSMUSG00000105837 | -2,38E+00 | -3,033595109 | 2,20E+00 | 1,38E-01 | 4,68E-01 | Gm35986       | 0,19 | No |
| ENSMUSG00000105841 | 9,57E-02  | -0,115547111 | 9,84E-02 | 7,54E-01 | 9,33E-01 | Mir3960       | 1,07 | No |
| ENSMUSG00000105842 | -1,46E+00 | -1,378179469 | 6,27E+00 | 1,23E-02 | 1,09E-01 | Gm43329       | 0,36 | No |
| ENSMUSG00000105843 | -8,32E-01 | -1,37840894  | 2,51E+00 | 1,13E-01 | 4,16E-01 | Gm19439       | 0,56 | No |
| ENSMUSG00000105845 | -1,23E+00 | -3,146117124 | 7,12E-01 | 3,99E-01 | 6,98E-01 | Gm42808       | 0,42 | No |
| ENSMUSG00000105846 | -1,87E+00 | -3,107637761 | 1,39E+00 | 2,38E-01 | 5,50E-01 | Gm43258       | 0,27 | No |
| ENSMUSG00000105847 | -1,74E-01 | -1,940048602 | 6,61E-02 | 7,97E-01 | 9,58E-01 | Mir7650       | 0,89 | No |
| ENSMUSG00000105848 | -6,81E-01 | -1,740742891 | 1,33E+00 | 2,49E-01 | 5,50E-01 | Gm42683       | 0,62 | No |
| ENSMUSG00000105851 | 5,46E-01  | -1,83199922  | 8,49E-01 | 3,57E-01 | 6,58E-01 | 9130604C24Rik | 1,46 | No |
| ENSMUSG00000105852 | 2,09E-01  | 2,894836942  | 3,22E+00 | 7,28E-02 | 3,42E-01 | Gm42890       | 1,16 | No |

|                    |           |              |          |          |          |               |      |     |
|--------------------|-----------|--------------|----------|----------|----------|---------------|------|-----|
| ENSMUSG00000105854 | -1,36E+00 | -2,832003082 | 1,17E+00 | 2,80E-01 | 5,77E-01 | Gm8925        | 0,39 | No  |
| ENSMUSG00000105856 | -1,73E+00 | -2,711626381 | 2,07E+00 | 1,50E-01 | 4,91E-01 | Gm43732       | 0,30 | No  |
| ENSMUSG00000105858 | 8,15E-01  | -2,683149496 | 5,78E-01 | 4,47E-01 | 7,38E-01 | 2310074N15Rik | 1,76 | No  |
| ENSMUSG00000105859 | 1,85E+00  | -3,107657832 | 1,35E+00 | 2,46E-01 | 5,50E-01 | Gm19185       | 3,61 | No  |
| ENSMUSG00000105860 | 6,20E-01  | -2,268044193 | 4,28E-01 | 5,13E-01 | 7,95E-01 | Gm42578       | 1,54 | No  |
| ENSMUSG00000105864 | -2,65E+00 | -2,770565238 | 2,81E+00 | 9,35E-02 | 3,83E-01 | Gm10484       | 0,16 | No  |
| ENSMUSG00000105865 | 1,57E+00  | -2,600778966 | 2,69E+00 | 1,01E-01 | 3,92E-01 | Gm34144       | 2,97 | No  |
| ENSMUSG00000105866 | -2,60E-01 | 5,551791415  | 1,43E+01 | 1,58E-04 | 3,55E-03 | Gm6745        | 0,84 | Yes |
| ENSMUSG00000105867 | -5,28E-01 | -2,185561158 | 4,46E-01 | 5,04E-01 | 7,89E-01 | Gm42517       | 0,69 | No  |
| ENSMUSG00000105868 | 3,26E-02  | 2,112098286  | 5,10E-02 | 8,21E-01 | 9,72E-01 | Gm43766       | 1,02 | No  |
| ENSMUSG00000105870 | -2,02E+00 | -2,711700683 | 3,08E+00 | 7,92E-02 | 3,60E-01 | 7330423F06Rik | 0,25 | No  |
| ENSMUSG00000105871 | 4,20E-01  | -0,669244384 | 1,35E+00 | 2,45E-01 | 5,50E-01 | Gm43147       | 1,34 | No  |
| ENSMUSG00000105875 | 2,90E-01  | 1,671126856  | 2,98E+00 | 8,43E-02 | 3,72E-01 | Gm43518       | 1,22 | No  |
| ENSMUSG00000105878 | 1,01E+00  | -2,378694502 | 1,28E+00 | 2,57E-01 | 5,50E-01 | Gm44330       | 2,01 | No  |
| ENSMUSG00000105879 | -3,40E-01 | 7,450294399  | 3,28E+01 | 1,02E-08 | 7,11E-07 | Gm6204        | 0,79 | Yes |
| ENSMUSG00000105881 | -3,18E-01 | 2,989105789  | 8,26E+00 | 4,05E-03 | 4,78E-02 | 4932422M17Rik | 0,80 | Yes |
| ENSMUSG00000105884 | 1,22E+00  | -3,146114919 | 6,90E-01 | 4,06E-01 | 7,02E-01 | Gm22711       | 2,33 | No  |
| ENSMUSG00000105889 | 1,81E+00  | -3,10765737  | 1,28E+00 | 2,58E-01 | 5,50E-01 | Gm42776       | 3,49 | No  |
| ENSMUSG00000105892 | 1,04E-01  | 3,028350992  | 8,56E-01 | 3,55E-01 | 6,56E-01 | Gm35013       | 1,07 | No  |
| ENSMUSG00000105893 | 1,61E+00  | -2,548258754 | 1,77E+00 | 1,83E-01 | 5,46E-01 | Wdr46-ps      | 3,05 | No  |
| ENSMUSG00000105895 | -3,65E-01 | 1,816575362  | 4,75E+00 | 2,92E-02 | 1,95E-01 | Gm42829       | 0,78 | No  |
| ENSMUSG00000105896 | -5,53E-02 | -2,548202262 | 2,45E-03 | 9,61E-01 | 1,00E+00 | Gm43311       | 0,96 | No  |
| ENSMUSG00000105902 | -1,63E-01 | -1,146219031 | 1,15E-01 | 7,34E-01 | 9,24E-01 | AC155839.1    | 0,89 | No  |
| ENSMUSG00000105904 | 9,77E-01  | -1,063934282 | 3,87E+00 | 4,91E-02 | 2,67E-01 | Mir24-1       | 1,97 | No  |
| ENSMUSG00000105906 | -1,25E+00 | -2,472939622 | 1,49E+00 | 2,22E-01 | 5,50E-01 | Iglc1         | 0,42 | No  |
| ENSMUSG00000105908 | 5,96E-02  | -0,954739688 | 1,91E-02 | 8,90E-01 | 1,00E+00 | Mir6920       | 1,04 | No  |
| ENSMUSG00000105911 | -6,79E-01 | -1,869451355 | 9,55E-01 | 3,29E-01 | 6,29E-01 | Snora16a      | 0,62 | No  |
| ENSMUSG00000105912 | -5,64E-02 | -2,355525586 | 4,38E-03 | 9,47E-01 | 1,00E+00 | Gm10440       | 0,96 | No  |
| ENSMUSG00000105913 | -4,81E-01 | -0,105840344 | 2,51E+00 | 1,13E-01 | 4,14E-01 | Mir5121       | 0,72 | No  |
| ENSMUSG00000105914 | -1,09E+00 | -0,980328409 | 6,22E+00 | 1,26E-02 | 1,11E-01 | Gm19243       | 0,47 | No  |
| ENSMUSG00000105918 | -4,75E-02 | 2,817630145  | 1,66E-01 | 6,84E-01 | 8,96E-01 | AC136146.1    | 0,97 | No  |
| ENSMUSG00000105920 | 2,21E-02  | 1,243990041  | 1,31E-02 | 9,09E-01 | 1,00E+00 | Gm5408        | 1,02 | No  |

|                    |           |              |           |          |          |                  |      |     |
|--------------------|-----------|--------------|-----------|----------|----------|------------------|------|-----|
| ENSMUSG00000105923 | 3,14E-02  | -3,107617333 | -7,69E-10 | 1,00E+00 | 1,00E+00 | A830019L24Rik    | 1,02 | No  |
| ENSMUSG00000105924 | -4,80E-01 | -2,015648149 | 4,90E-01  | 4,84E-01 | 7,71E-01 | Gm44359          | 0,72 | No  |
| ENSMUSG00000105925 | -7,88E-02 | -2,832053444 | 4,26E-03  | 9,48E-01 | 1,00E+00 | Gm43846          | 0,95 | No  |
| ENSMUSG00000105926 | 1,26E+00  | -2,268073034 | 2,15E+00  | 1,43E-01 | 4,77E-01 | Gm43386          | 2,39 | No  |
| ENSMUSG00000105928 | 1,09E-01  | 3,17142056   | 1,00E+00  | 3,17E-01 | 6,18E-01 | Gm9256           | 1,08 | No  |
| ENSMUSG00000105929 | -2,78E-01 | -0,485281315 | 5,39E-01  | 4,63E-01 | 7,52E-01 | Gm43693          | 0,82 | No  |
| ENSMUSG00000105932 | -6,72E-01 | -2,83196929  | 3,00E-01  | 5,84E-01 | 8,38E-01 | Mir6925          | 0,63 | No  |
| ENSMUSG00000105933 | -2,68E+00 | -2,896121483 | 2,85E+00  | 9,14E-02 | 3,82E-01 | Gm43260          | 0,16 | No  |
| ENSMUSG00000105935 | -4,92E-01 | -0,946009226 | 1,18E+00  | 2,78E-01 | 5,74E-01 | Gm43628          | 0,71 | No  |
| ENSMUSG00000105936 | -1,22E+00 | -2,600696625 | 1,42E+00  | 2,34E-01 | 5,50E-01 | Gm43544          | 0,43 | No  |
| ENSMUSG00000105937 | -2,66E+00 | -2,770564383 | 2,82E+00  | 9,29E-02 | 3,83E-01 | Gm43602          | 0,16 | No  |
| ENSMUSG00000105940 | -8,07E-01 | -2,268028517 | 9,49E-01  | 3,30E-01 | 6,30E-01 | Gm42635          | 0,57 | No  |
| ENSMUSG00000105941 | 3,38E-01  | -0,141411926 | 1,09E+00  | 2,96E-01 | 5,92E-01 | Gm42809          | 1,26 | No  |
| ENSMUSG00000105942 | -8,32E-01 | -2,896113506 | 3,80E-01  | 5,38E-01 | 8,09E-01 | Gm43175          | 0,56 | No  |
| ENSMUSG00000105943 | -2,79E-01 | 3,872368889  | 9,38E+00  | 2,19E-03 | 3,01E-02 | Gm2965           | 0,82 | Yes |
| ENSMUSG00000105944 | -1,87E-01 | 1,629661695  | 1,24E+00  | 2,65E-01 | 5,61E-01 | Gm5075           | 0,88 | No  |
| ENSMUSG00000105945 | -1,75E+00 | -2,963255813 | 1,52E+00  | 2,18E-01 | 5,50E-01 | Gm43570          | 0,30 | No  |
| ENSMUSG00000105949 | 1,73E-01  | 0,323855036  | 4,04E-01  | 5,25E-01 | 8,02E-01 | Gm6510           | 1,13 | No  |
| ENSMUSG00000105950 | -6,76E-02 | 0,955328229  | 1,03E-01  | 7,48E-01 | 9,30E-01 | Gm43679          | 0,95 | No  |
| ENSMUSG00000105953 | 1,87E+00  | -3,107639691 | 1,38E+00  | 2,40E-01 | 5,50E-01 | Trav15d-2-dv6d-2 | 3,67 | No  |
| ENSMUSG00000105954 | 3,94E-01  | 3,083175177  | 1,22E+01  | 4,68E-04 | 8,69E-03 | Gm42793          | 1,31 | Yes |
| ENSMUSG00000105957 | 2,33E-01  | -0,448898401 | 4,63E-01  | 4,96E-01 | 7,81E-01 | Gm43254          | 1,18 | No  |
| ENSMUSG00000105959 | 1,21E-02  | -3,033650469 | 7,34E-11  | 1,00E+00 | 1,00E+00 | D530037P16Rik    | 1,01 | No  |
| ENSMUSG00000105961 | -2,21E-02 | -0,668989512 | 3,37E-03  | 9,54E-01 | 1,00E+00 | Gm40123          | 0,98 | No  |
| ENSMUSG00000105962 | -5,41E-01 | -1,770699647 | 8,78E-01  | 3,49E-01 | 6,50E-01 | Gm42432          | 0,69 | No  |
| ENSMUSG00000105964 | -9,11E-01 | -3,159433134 | 4,59E-01  | 4,98E-01 | 7,83E-01 | Mir219c          | 0,53 | No  |
| ENSMUSG00000105965 | -1,89E+00 | -3,1076441   | 1,42E+00  | 2,33E-01 | 5,50E-01 | Cycs-ps2         | 0,27 | No  |
| ENSMUSG00000105970 | -9,30E-02 | 0,006464725  | 1,01E-01  | 7,50E-01 | 9,31E-01 | Gm43360          | 0,94 | No  |
| ENSMUSG00000105972 | -3,59E-01 | -2,918604735 | 6,28E-02  | 8,02E-01 | 9,61E-01 | Mir1843a         | 0,78 | No  |
| ENSMUSG00000105973 | 3,80E-01  | -2,146184442 | 2,30E-01  | 6,31E-01 | 8,63E-01 | Gm42881          | 1,30 | No  |
| ENSMUSG00000105975 | -2,49E-02 | -3,146121042 | -4,44E-11 | 1,00E+00 | 1,00E+00 | Gm42609          | 0,98 | No  |
| ENSMUSG00000105976 | -4,06E-01 | -1,088746727 | 9,83E-01  | 3,21E-01 | 6,22E-01 | Gm42782          | 0,75 | No  |

|                    |           |              |           |          |          |               |      |     |
|--------------------|-----------|--------------|-----------|----------|----------|---------------|------|-----|
| ENSMUSG00000105977 | 4,03E-01  | 2,200341994  | 8,29E+00  | 3,98E-03 | 4,72E-02 | Gm43555       | 1,32 | Yes |
| ENSMUSG00000105979 | -9,79E-01 | -2,268037082 | 1,16E+00  | 2,81E-01 | 5,78E-01 | Gm43411       | 0,51 | No  |
| ENSMUSG00000105981 | -2,40E-01 | -0,413039717 | 4,56E-01  | 4,99E-01 | 7,85E-01 | 2810428J06Rik | 0,85 | No  |
| ENSMUSG00000105982 | -7,96E-02 | -2,683129631 | 5,02E-03  | 9,43E-01 | 1,00E+00 | Mir6896       | 0,95 | No  |
| ENSMUSG00000105986 | 1,56E-01  | -1,126606505 | 1,10E-01  | 7,40E-01 | 9,26E-01 | Gm43065       | 1,11 | No  |
| ENSMUSG00000105987 | 2,03E-01  | 6,838493986  | 1,09E+01  | 9,42E-04 | 1,54E-02 | AI506816      | 1,15 | Yes |
| ENSMUSG00000105990 | -1,04E-02 | -1,226491843 | 4,94E-04  | 9,82E-01 | 1,00E+00 | Gm43307       | 0,99 | No  |
| ENSMUSG00000105992 | -1,76E-01 | -1,52258942  | 9,01E-02  | 7,64E-01 | 9,39E-01 | Gm43651       | 0,89 | No  |
| ENSMUSG00000105995 | -2,93E-01 | 0,001816677  | 9,41E-01  | 3,32E-01 | 6,32E-01 | Gm43554       | 0,82 | No  |
| ENSMUSG00000105999 | -3,36E-01 | -2,268140494 | 1,69E-01  | 6,81E-01 | 8,94E-01 | Gm2213        | 0,79 | No  |
| ENSMUSG00000106002 | -2,66E+00 | -2,9632547   | 2,82E+00  | 9,28E-02 | 3,83E-01 | 5430434I15Rik | 0,16 | No  |
| ENSMUSG00000106005 | -3,39E+00 | -2,740823241 | 5,01E+00  | 2,52E-02 | 1,75E-01 | Gm29151       | 0,10 | No  |
| ENSMUSG00000106006 | 2,06E-02  | -3,146103739 | -9,26E-10 | 1,00E+00 | 1,00E+00 | Gm17951       | 1,01 | No  |
| ENSMUSG00000106012 | 1,85E+00  | -3,107657832 | 1,35E+00  | 2,46E-01 | 5,50E-01 | Gm43744       | 3,61 | No  |
| ENSMUSG00000106014 | -5,40E-02 | 1,167999764  | 7,67E-02  | 7,82E-01 | 9,50E-01 | AL593843.1    | 0,96 | No  |
| ENSMUSG00000106015 | -7,64E-01 | -2,60068187  | 6,56E-01  | 4,18E-01 | 7,13E-01 | Gm42980       | 0,59 | No  |
| ENSMUSG00000106019 | 2,04E-01  | 2,427522259  | 2,27E+00  | 1,32E-01 | 4,57E-01 | Gm43672       | 1,15 | No  |
| ENSMUSG00000106022 | -3,95E-02 | -2,963274761 | 7,08E-04  | 9,79E-01 | 1,00E+00 | Gm42929       | 0,97 | No  |
| ENSMUSG00000106024 | -3,19E+00 | -2,963221167 | 4,28E+00  | 3,87E-02 | 2,33E-01 | A530083M17Rik | 0,11 | No  |
| ENSMUSG00000106025 | 7,51E-02  | -0,937645998 | 2,77E-02  | 8,68E-01 | 1,00E+00 | Gm42940       | 1,05 | No  |
| ENSMUSG00000106028 | 6,99E-01  | 0,41254954   | 7,26E+00  | 7,06E-03 | 7,23E-02 | Gm8493        | 1,62 | No  |
| ENSMUSG00000106032 | 3,26E-01  | -1,289547358 | 4,56E-01  | 5,00E-01 | 7,85E-01 | Gm42463       | 1,25 | No  |
| ENSMUSG00000106035 | 1,56E-02  | 1,304298099  | 7,08E-03  | 9,33E-01 | 1,00E+00 | Gm43545       | 1,01 | No  |
| ENSMUSG00000106037 | -2,06E-01 | 8,053269649  | 1,26E+01  | 3,88E-04 | 7,45E-03 | Gm4332        | 0,87 | Yes |
| ENSMUSG00000106038 | 4,05E-01  | 1,877158782  | 6,74E+00  | 9,40E-03 | 8,92E-02 | Gm4962        | 1,32 | No  |
| ENSMUSG00000106044 | 2,05E-01  | -1,448472634 | 1,17E-01  | 7,32E-01 | 9,23E-01 | Gm42860       | 1,15 | No  |
| ENSMUSG00000106045 | 9,01E-03  | -3,107646452 | -5,16E-10 | 1,00E+00 | 1,00E+00 | Gm42996       | 1,01 | No  |
| ENSMUSG00000106046 | 1,87E+00  | -3,107639691 | 1,38E+00  | 2,40E-01 | 5,50E-01 | Gm44462       | 3,67 | No  |
| ENSMUSG00000106054 | 2,62E+00  | -2,963293967 | 2,65E+00  | 1,04E-01 | 3,95E-01 | Gm43623       | 6,13 | No  |
| ENSMUSG00000106057 | -2,82E+00 | -2,448685326 | 7,71E+00  | 5,48E-03 | 5,98E-02 | Gm43560       | 0,14 | No  |
| ENSMUSG00000106058 | 1,81E+00  | -3,10765737  | 1,28E+00  | 2,58E-01 | 5,50E-01 | Gm43013       | 3,49 | No  |
| ENSMUSG00000106059 | -1,32E-01 | 0,97946434   | 3,88E-01  | 5,33E-01 | 8,06E-01 | Gm9364        | 0,91 | No  |



|                    |           |              |          |          |          |               |      |     |
|--------------------|-----------|--------------|----------|----------|----------|---------------|------|-----|
| ENSMUSG00000106061 | 4,44E-01  | -2,311261839 | 2,68E-01 | 6,05E-01 | 8,49E-01 | Gm43773       | 1,36 | No  |
| ENSMUSG00000106062 | -4,56E-02 | -2,600640927 | 1,46E-03 | 9,69E-01 | 1,00E+00 | Gm43820       | 0,97 | No  |
| ENSMUSG00000106063 | 1,85E+00  | -3,107657832 | 1,35E+00 | 2,46E-01 | 5,50E-01 | C030032O16Rik | 3,61 | No  |
| ENSMUSG00000106067 | 2,78E-01  | 1,139820628  | 2,01E+00 | 1,57E-01 | 5,01E-01 | Gm7902        | 1,21 | No  |
| ENSMUSG00000106068 | 5,39E-02  | -0,070326294 | 3,22E-02 | 8,58E-01 | 9,94E-01 | Gm9497        | 1,04 | No  |
| ENSMUSG00000106071 | -7,38E-02 | -3,033659033 | 2,66E-03 | 9,59E-01 | 1,00E+00 | Gm43826       | 0,95 | No  |
| ENSMUSG00000106073 | -1,87E+00 | -3,107637761 | 1,39E+00 | 2,38E-01 | 5,50E-01 | Gm42892       | 0,27 | No  |
| ENSMUSG00000106075 | -1,59E-02 | -2,96323932  | 1,18E-04 | 9,91E-01 | 1,00E+00 | Gm42804       | 0,99 | No  |
| ENSMUSG00000106077 | 2,74E-02  | -3,033621357 | 9,16E-12 | 1,00E+00 | 1,00E+00 | Gm5660        | 1,02 | No  |
| ENSMUSG00000106081 | 3,56E-01  | 0,159963657  | 1,57E+00 | 2,10E-01 | 5,50E-01 | AC084391.1    | 1,28 | No  |
| ENSMUSG00000106082 | 3,29E-01  | 3,820451715  | 1,27E+01 | 3,60E-04 | 7,03E-03 | 4930404A12Rik | 1,26 | Yes |
| ENSMUSG00000106086 | 8,92E-02  | -2,333187186 | 1,05E-02 | 9,18E-01 | 1,00E+00 | Gm43352       | 1,06 | No  |
| ENSMUSG00000106087 | 3,81E-01  | -0,676282677 | 1,04E+00 | 3,07E-01 | 6,05E-01 | Gm43609       | 1,30 | No  |
| ENSMUSG00000106089 | 4,77E-01  | -1,126790638 | 1,02E+00 | 3,13E-01 | 6,14E-01 | Gm9419        | 1,39 | No  |
| ENSMUSG00000106090 | -1,90E+00 | -3,033647263 | 1,44E+00 | 2,30E-01 | 5,50E-01 | Gm43704       | 0,27 | No  |
| ENSMUSG00000106091 | -1,89E+00 | -3,1076441   | 1,42E+00 | 2,33E-01 | 5,50E-01 | Gm44370       | 0,27 | No  |
| ENSMUSG00000106092 | -2,88E-02 | -2,896149716 | 4,65E-04 | 9,83E-01 | 1,00E+00 | Gm43072       | 0,98 | No  |
| ENSMUSG00000106093 | 8,08E-01  | -2,800982228 | 4,61E-01 | 4,97E-01 | 7,82E-01 | Gm42722       | 1,75 | No  |
| ENSMUSG00000106094 | -5,13E-02 | 1,747908176  | 9,53E-02 | 7,58E-01 | 9,35E-01 | Gm18916       | 0,97 | No  |
| ENSMUSG00000106096 | 3,60E-01  | -0,561218431 | 9,24E-01 | 3,36E-01 | 6,37E-01 | B230207O21Rik | 1,28 | No  |
| ENSMUSG00000106099 | -1,79E-01 | 4,018126419  | 3,97E+00 | 4,63E-02 | 2,57E-01 | Gm42664       | 0,88 | No  |
| ENSMUSG00000106102 | -7,72E-01 | -1,448710756 | 1,93E+00 | 1,64E-01 | 5,16E-01 | Gm43493       | 0,59 | No  |
| ENSMUSG00000106103 | 8,04E-01  | -2,683165935 | 5,62E-01 | 4,54E-01 | 7,43E-01 | Gm43081       | 1,75 | No  |
| ENSMUSG00000106104 | 1,89E+00  | -3,033614598 | 1,38E+00 | 2,40E-01 | 5,50E-01 | Gm42660       | 3,70 | No  |
| ENSMUSG00000106105 | 2,61E+00  | -3,033672762 | 2,63E+00 | 1,05E-01 | 3,97E-01 | Gm4525        | 6,10 | No  |
| ENSMUSG00000106106 | -5,29E-01 | 9,85911853   | 8,57E+01 | 2,07E-20 | 4,86E-18 | CT010467.1    | 0,69 | Yes |
| ENSMUSG00000106108 | -1,12E+00 | -0,895976725 | 5,40E+00 | 2,02E-02 | 1,52E-01 | Gm43221       | 0,46 | No  |
| ENSMUSG00000106110 | -4,23E+00 | -2,378216705 | 9,36E+00 | 2,22E-03 | 3,04E-02 | Gm43571       | 0,05 | Yes |
| ENSMUSG00000106115 | -1,00E+00 | -1,997997568 | 1,88E+00 | 1,70E-01 | 5,26E-01 | Gm43420       | 0,50 | No  |
| ENSMUSG00000106116 | 2,63E+00  | -2,963275836 | 2,67E+00 | 1,02E-01 | 3,94E-01 | Gm18830       | 6,19 | No  |
| ENSMUSG00000106117 | 1,85E+00  | -3,107657832 | 1,35E+00 | 2,46E-01 | 5,50E-01 | Gm5284        | 3,61 | No  |
| ENSMUSG00000106120 | 3,97E-01  | -2,896146769 | 7,89E-02 | 7,79E-01 | 9,47E-01 | Gm42697       | 1,32 | No  |

|                    |           |              |          |          |          |               |      |     |
|--------------------|-----------|--------------|----------|----------|----------|---------------|------|-----|
| ENSMUSG00000106125 | 5,06E-01  | -2,355542537 | 3,48E-01 | 5,55E-01 | 8,20E-01 | 4930512P04Rik | 1,42 | No  |
| ENSMUSG00000106127 | 2,06E-01  | -1,355623513 | 1,58E-01 | 6,91E-01 | 9,00E-01 | 4930520M14Rik | 1,15 | No  |
| ENSMUSG00000106128 | 3,14E+00  | -2,896171661 | 4,02E+00 | 4,50E-02 | 2,53E-01 | Gm43520       | 8,80 | No  |
| ENSMUSG00000106133 | 1,51E-02  | 4,429632384  | 3,44E-02 | 8,53E-01 | 9,91E-01 | Gm3724        | 1,01 | No  |
| ENSMUSG00000106135 | -6,94E-01 | 1,301282968  | 1,35E+01 | 2,33E-04 | 4,94E-03 | Gm6543        | 0,62 | Yes |
| ENSMUSG00000106137 | -7,06E-02 | -2,126716617 | 9,27E-03 | 9,23E-01 | 1,00E+00 | Gm42538       | 0,95 | No  |
| ENSMUSG00000106140 | -1,94E+00 | -3,107619243 | 1,50E+00 | 2,21E-01 | 5,50E-01 | Gm42208       | 0,26 | No  |
| ENSMUSG00000106142 | 2,12E+00  | -2,655158363 | 3,60E+00 | 5,80E-02 | 2,97E-01 | Gm17937       | 4,36 | No  |
| ENSMUSG00000106144 | 2,87E-01  | -2,83201524  | 5,07E-02 | 8,22E-01 | 9,72E-01 | Gm43972       | 1,22 | No  |
| ENSMUSG00000106145 | 7,64E-01  | -2,070202472 | 7,75E-01 | 3,79E-01 | 6,79E-01 | Mir7073       | 1,70 | No  |
| ENSMUSG00000106147 | -8,27E-01 | -2,800953625 | 3,75E-01 | 5,40E-01 | 8,10E-01 | Rnu3a         | 0,56 | No  |
| ENSMUSG00000106149 | -1,39E+00 | 0,944351273  | 3,92E+01 | 3,84E-10 | 3,37E-08 | Gm43430       | 0,38 | Yes |
| ENSMUSG00000106153 | 1,84E+00  | -3,033632273 | 1,33E+00 | 2,49E-01 | 5,50E-01 | Gm43677       | 3,58 | No  |
| ENSMUSG00000106155 | -3,57E-01 | 1,786289823  | 4,80E+00 | 2,85E-02 | 1,91E-01 | Gm43495       | 0,78 | No  |
| ENSMUSG00000106156 | -1,65E-01 | 0,124399038  | 3,63E-01 | 5,47E-01 | 8,14E-01 | Gm21040       | 0,89 | No  |
| ENSMUSG00000106157 | -6,92E-02 | -1,333168795 | 1,79E-02 | 8,94E-01 | 1,00E+00 | 4930555A03Rik | 0,95 | No  |
| ENSMUSG00000106158 | 2,34E-01  | -0,117205416 | 5,46E-01 | 4,60E-01 | 7,49E-01 | Gm43216       | 1,18 | No  |
| ENSMUSG00000106160 | -5,28E-01 | -2,311162712 | 4,46E-01 | 5,04E-01 | 7,89E-01 | Gm43610       | 0,69 | No  |
| ENSMUSG00000106164 | 1,16E+00  | -2,71173751  | 1,06E+00 | 3,03E-01 | 5,99E-01 | 9430085M18Rik | 2,24 | No  |
| ENSMUSG00000106165 | 1,81E+00  | -3,10765737  | 1,28E+00 | 2,58E-01 | 5,50E-01 | Gm3922        | 3,49 | No  |
| ENSMUSG00000106166 | -9,56E-01 | -1,311204036 | 3,58E+00 | 5,83E-02 | 2,98E-01 | Gm43484       | 0,52 | No  |
| ENSMUSG00000106169 | -7,77E-02 | -0,788308144 | 3,61E-02 | 8,49E-01 | 9,89E-01 | Mir6948       | 0,95 | No  |
| ENSMUSG00000106170 | -4,74E-01 | 1,095713427  | 6,19E+00 | 1,29E-02 | 1,12E-01 | Gm43393       | 0,72 | No  |
| ENSMUSG00000106173 | 1,63E+00  | -2,65517874  | 1,81E+00 | 1,78E-01 | 5,39E-01 | Gm42764       | 3,09 | No  |
| ENSMUSG00000106175 | 1,35E-01  | 0,877811416  | 3,70E-01 | 5,43E-01 | 8,12E-01 | Gm44313       | 1,10 | No  |
| ENSMUSG00000106178 | -3,42E-01 | -2,863734606 | 8,61E-02 | 7,69E-01 | 9,42E-01 | Gm42987       | 0,79 | No  |
| ENSMUSG00000106179 | 3,02E-01  | 0,535960728  | 1,43E+00 | 2,32E-01 | 5,50E-01 | AL603834.1    | 1,23 | No  |
| ENSMUSG00000106181 | 1,07E-03  | 4,623861283  | 1,85E-04 | 9,89E-01 | 1,00E+00 | Gm9523        | 1,00 | No  |
| ENSMUSG00000106182 | -1,92E+00 | -2,963214917 | 1,46E+00 | 2,27E-01 | 5,50E-01 | Gm7442        | 0,26 | No  |
| ENSMUSG00000106184 | -3,57E+00 | -2,711703936 | 5,73E+00 | 1,66E-02 | 1,34E-01 | Gm43463       | 0,08 | No  |
| ENSMUSG00000106188 | 5,72E-01  | -2,051846318 | 6,50E-01 | 4,20E-01 | 7,15E-01 | Gm9710        | 1,49 | No  |
| ENSMUSG00000106189 | -7,04E-01 | 0,229566858  | 6,65E+00 | 9,92E-03 | 9,27E-02 | Gm42933       | 0,61 | No  |

|                    |           |              |           |          |          |               |      |    |
|--------------------|-----------|--------------|-----------|----------|----------|---------------|------|----|
| ENSMUSG00000106190 | -4,02E-04 | 3,914010876  | 1,91E-05  | 9,97E-01 | 1,00E+00 | Gm20768       | 1,00 | No |
| ENSMUSG00000106191 | -2,70E+00 | -3,033614577 | 2,89E+00  | 8,93E-02 | 3,79E-01 | 4930557B06Rik | 0,15 | No |
| ENSMUSG00000106192 | 3,14E-02  | -3,107617333 | -7,69E-10 | 1,00E+00 | 1,00E+00 | Gm42818       | 1,02 | No |
| ENSMUSG00000106193 | 6,39E-02  | 0,059441076  | 4,93E-02  | 8,24E-01 | 9,73E-01 | Mir7090       | 1,05 | No |
| ENSMUSG00000106194 | -2,07E-01 | -1,94611175  | 1,05E-01  | 7,46E-01 | 9,30E-01 | Gm43569       | 0,87 | No |
| ENSMUSG00000106197 | 1,47E-01  | -1,627671752 | 6,50E-02  | 7,99E-01 | 9,59E-01 | Gm42717       | 1,11 | No |
| ENSMUSG00000106198 | 1,48E+00  | -3,132917895 | 9,25E-01  | 3,36E-01 | 6,37E-01 | Gm42504       | 2,78 | No |
| ENSMUSG00000106200 | -4,02E-01 | -1,098094905 | 7,60E-01  | 3,83E-01 | 6,85E-01 | Gm44341       | 0,76 | No |
| ENSMUSG00000106201 | 2,36E-01  | -2,311179948 | 7,03E-02  | 7,91E-01 | 9,55E-01 | Gm7815        | 1,18 | No |
| ENSMUSG00000106202 | -4,01E-02 | -2,963238858 | 7,31E-04  | 9,78E-01 | 1,00E+00 | Gm43727       | 0,97 | No |
| ENSMUSG00000106203 | 1,40E+00  | -2,289497873 | 2,39E+00  | 1,22E-01 | 4,36E-01 | Gm44484       | 2,63 | No |
| ENSMUSG00000106204 | -7,61E-02 | -2,600677931 | 6,68E-03  | 9,35E-01 | 1,00E+00 | Gm21009       | 0,95 | No |
| ENSMUSG00000106205 | -1,40E-01 | -1,079335287 | 9,37E-02  | 7,59E-01 | 9,36E-01 | C230096K16Rik | 0,91 | No |
| ENSMUSG00000106208 | -1,68E-01 | 0,747565358  | 5,49E-01  | 4,59E-01 | 7,48E-01 | Gm4734        | 0,89 | No |
| ENSMUSG00000106209 | 3,28E-01  | 0,191266144  | 1,37E+00  | 2,41E-01 | 5,50E-01 | Gm42918       | 1,26 | No |
| ENSMUSG00000106212 | -5,65E-02 | -2,896155589 | 2,13E-03  | 9,63E-01 | 1,00E+00 | Gm43112       | 0,96 | No |
| ENSMUSG00000106218 | -4,29E-02 | 1,009209017  | 4,36E-02  | 8,35E-01 | 9,80E-01 | Gm43713       | 0,97 | No |
| ENSMUSG00000106219 | -3,80E-01 | -0,980527143 | 8,22E-01  | 3,65E-01 | 6,66E-01 | 5830416I19Rik | 0,77 | No |
| ENSMUSG00000106224 | 2,62E+00  | -2,896136672 | 2,66E+00  | 1,03E-01 | 3,95E-01 | Gm43823       | 6,16 | No |
| ENSMUSG00000106227 | -2,84E-01 | -1,9980012   | 1,40E-01  | 7,09E-01 | 9,09E-01 | Gm43464       | 0,82 | No |
| ENSMUSG00000106229 | -5,28E-01 | -2,205780104 | 5,28E-01  | 4,68E-01 | 7,56E-01 | Gm19409       | 0,69 | No |
| ENSMUSG00000106230 | -6,52E-01 | -2,015736518 | 8,99E-01  | 3,43E-01 | 6,44E-01 | Gm29811       | 0,64 | No |
| ENSMUSG00000106232 | 6,04E-01  | -3,070162753 | 1,46E-01  | 7,03E-01 | 9,06E-01 | Gm43236       | 1,52 | No |
| ENSMUSG00000106234 | 1,82E+00  | -3,033667329 | 1,31E+00  | 2,52E-01 | 5,50E-01 | Gm43535       | 3,54 | No |
| ENSMUSG00000106236 | 3,56E-01  | -2,247069635 | 2,18E-01  | 6,41E-01 | 8,70E-01 | Gm38670       | 1,28 | No |
| ENSMUSG00000106237 | 9,30E-02  | 1,40581465   | 2,70E-01  | 6,03E-01 | 8,48E-01 | Gm8066        | 1,07 | No |
| ENSMUSG00000106239 | -3,82E-02 | 3,577068617  | 1,51E-01  | 6,98E-01 | 9,04E-01 | Gm9260        | 0,97 | No |
| ENSMUSG00000106241 | 9,44E-01  | -0,946374352 | 4,38E+00  | 3,63E-02 | 2,26E-01 | Gm43143       | 1,92 | No |
| ENSMUSG00000106243 | 1,20E+00  | -2,89618018  | 8,83E-01  | 3,47E-01 | 6,48E-01 | Gm5050        | 2,29 | No |
| ENSMUSG00000106246 | -1,12E-01 | 2,687754259  | 8,16E-01  | 3,66E-01 | 6,67E-01 | Gm18867       | 0,93 | No |
| ENSMUSG00000106247 | 4,40E-01  | 0,238119649  | 2,80E+00  | 9,42E-02 | 3,84E-01 | Gm43720       | 1,36 | No |
| ENSMUSG00000106251 | -1,03E-01 | 2,075309415  | 4,73E-01  | 4,91E-01 | 7,77E-01 | Gm42658       | 0,93 | No |

|                    |           |              |           |          |          |               |      |     |
|--------------------|-----------|--------------|-----------|----------|----------|---------------|------|-----|
| ENSMUSG00000106252 | 1,64E-01  | 0,621372775  | 5,05E-01  | 4,77E-01 | 7,65E-01 | Mir684-1      | 1,12 | No  |
| ENSMUSG00000106254 | -5,66E-01 | -1,831930873 | 7,92E-01  | 3,73E-01 | 6,74E-01 | Gm42907       | 0,68 | No  |
| ENSMUSG00000106257 | 1,14E-01  | 0,520591735  | 2,10E-01  | 6,47E-01 | 8,74E-01 | Gm9023        | 1,08 | No  |
| ENSMUSG00000106258 | 4,61E-02  | 2,917837081  | 1,61E-01  | 6,88E-01 | 8,98E-01 | Rpl7a-ps7     | 1,03 | No  |
| ENSMUSG00000106260 | -2,75E-01 | 1,645552095  | 2,69E+00  | 1,01E-01 | 3,93E-01 | Gm43524       | 0,83 | No  |
| ENSMUSG00000106261 | 8,05E-01  | -2,268120018 | 5,65E-01  | 4,52E-01 | 7,42E-01 | Gm34086       | 1,75 | No  |
| ENSMUSG00000106262 | -1,68E-01 | 1,120260009  | 6,71E-01  | 4,13E-01 | 7,08E-01 | Gm43375       | 0,89 | No  |
| ENSMUSG00000106265 | -1,87E+00 | -3,107637761 | 1,39E+00  | 2,38E-01 | 5,50E-01 | Gm42490       | 0,27 | No  |
| ENSMUSG00000106267 | -1,23E+00 | -2,99798615  | 7,12E-01  | 3,99E-01 | 6,98E-01 | Gm40319       | 0,43 | No  |
| ENSMUSG00000106268 | 2,60E-03  | -0,042693423 | 6,71E-05  | 9,93E-01 | 1,00E+00 | Gm18492       | 1,00 | No  |
| ENSMUSG00000106269 | 1,69E+00  | -2,497631826 | 2,62E+00  | 1,05E-01 | 3,98E-01 | 4930580E04Rik | 3,22 | No  |
| ENSMUSG00000106271 | -2,70E+00 | -3,033614577 | 2,89E+00  | 8,93E-02 | 3,79E-01 | Gm43752       | 0,15 | No  |
| ENSMUSG00000106272 | 1,20E+00  | -3,146123991 | 6,74E-01  | 4,12E-01 | 7,07E-01 | Gm22897       | 2,30 | No  |
| ENSMUSG00000106273 | 4,59E-01  | -0,863884964 | 1,18E+00  | 2,77E-01 | 5,73E-01 | Gm43767       | 1,38 | No  |
| ENSMUSG00000106276 | 3,22E-01  | 0,045235747  | 1,15E+00  | 2,83E-01 | 5,80E-01 | Gm9397        | 1,25 | No  |
| ENSMUSG00000106279 | -1,21E+00 | -0,068357273 | 1,31E+01  | 2,95E-04 | 5,97E-03 | AC099934.2    | 0,43 | Yes |
| ENSMUSG00000106281 | 5,58E-01  | -2,627645578 | 2,96E-01  | 5,87E-01 | 8,40E-01 | Gm44346       | 1,47 | No  |
| ENSMUSG00000106282 | -1,03E+00 | -2,268056836 | 1,63E+00  | 2,02E-01 | 5,50E-01 | Gm2287        | 0,49 | No  |
| ENSMUSG00000106287 | -2,27E-01 | -1,929342037 | 1,26E-01  | 7,22E-01 | 9,17E-01 | Gm43585       | 0,85 | No  |
| ENSMUSG00000106288 | 2,44E-02  | 0,737335516  | 1,02E-02  | 9,20E-01 | 1,00E+00 | Gm43593       | 1,02 | No  |
| ENSMUSG00000106290 | 5,92E-01  | -1,548308962 | 1,12E+00  | 2,91E-01 | 5,86E-01 | Gm43429       | 1,51 | No  |
| ENSMUSG00000106291 | 4,35E-01  | -1,107652796 | 8,92E-01  | 3,45E-01 | 6,46E-01 | 1110003F10Rik | 1,35 | No  |
| ENSMUSG00000106292 | -1,87E+00 | -3,107637761 | 1,39E+00  | 2,38E-01 | 5,50E-01 | Gm43174       | 0,27 | No  |
| ENSMUSG00000106294 | -1,65E-01 | 4,097407733  | 3,61E+00  | 5,75E-02 | 2,95E-01 | Gm8539        | 0,89 | No  |
| ENSMUSG00000106299 | -3,45E-01 | -2,497598046 | 1,50E-01  | 6,99E-01 | 9,04E-01 | Gm44339       | 0,79 | No  |
| ENSMUSG00000106302 | -4,55E-01 | -0,755566637 | 1,30E+00  | 2,55E-01 | 5,50E-01 | Mir6902       | 0,73 | No  |
| ENSMUSG00000106304 | 3,14E-02  | -3,107617333 | -7,69E-10 | 1,00E+00 | 1,00E+00 | Gm42518       | 1,02 | No  |
| ENSMUSG00000106305 | 1,85E+00  | -3,107657832 | 1,35E+00  | 2,46E-01 | 5,50E-01 | Gm42911       | 3,61 | No  |
| ENSMUSG00000106306 | -3,95E-02 | -2,963274761 | 7,08E-04  | 9,79E-01 | 1,00E+00 | 4933401H06Rik | 0,97 | No  |
| ENSMUSG00000106311 | 1,22E+00  | -3,146114919 | 6,90E-01  | 4,06E-01 | 7,02E-01 | Gm43755       | 2,33 | No  |
| ENSMUSG00000106313 | 1,07E+00  | -1,522826535 | 3,44E+00  | 6,36E-02 | 3,15E-01 | Gm9402        | 2,09 | No  |
| ENSMUSG00000106317 | 3,17E-01  | 0,425545993  | 1,53E+00  | 2,16E-01 | 5,50E-01 | Gm43848       | 1,25 | No  |

|                    |           |              |           |          |          |               |      |     |
|--------------------|-----------|--------------|-----------|----------|----------|---------------|------|-----|
| ENSMUSG00000106319 | -2,52E-01 | 0,180028157  | 9,72E-01  | 3,24E-01 | 6,25E-01 | Gm42601       | 0,84 | No  |
| ENSMUSG00000106321 | 4,55E-01  | -0,963202885 | 1,21E+00  | 2,71E-01 | 5,67E-01 | Gm43674       | 1,37 | No  |
| ENSMUSG00000106322 | 7,78E-01  | -2,83196814  | 3,28E-01  | 5,67E-01 | 8,29E-01 | Gm43432       | 1,71 | No  |
| ENSMUSG00000106326 | -1,24E-01 | 1,140365924  | 3,95E-01  | 5,30E-01 | 8,05E-01 | Gm42977       | 0,92 | No  |
| ENSMUSG00000106328 | -1,31E-01 | -1,535288536 | 5,92E-02  | 8,08E-01 | 9,64E-01 | Mir7118       | 0,91 | No  |
| ENSMUSG00000106329 | -5,48E-02 | -2,44869856  | 3,11E-03  | 9,56E-01 | 1,00E+00 | Gm10652       | 0,96 | No  |
| ENSMUSG00000106330 | -3,55E-01 | -1,146002025 | 6,16E-01  | 4,32E-01 | 7,26E-01 | Gm43369       | 0,78 | No  |
| ENSMUSG00000106333 | -6,30E-02 | -2,497637731 | 4,55E-03  | 9,46E-01 | 1,00E+00 | 4930428O21Rik | 0,96 | No  |
| ENSMUSG00000106334 | -7,90E-02 | 3,779173889  | 7,43E-01  | 3,89E-01 | 6,89E-01 | Gm43549       | 0,95 | No  |
| ENSMUSG00000106339 | -2,67E-01 | -0,847803159 | 4,43E-01  | 5,06E-01 | 7,90E-01 | Gm43489       | 0,83 | No  |
| ENSMUSG00000106341 | -3,45E+00 | -1,997871274 | 1,41E+01  | 1,78E-04 | 3,94E-03 | Gm43330       | 0,09 | Yes |
| ENSMUSG00000106344 | 4,63E-03  | 3,521663741  | 2,17E-03  | 9,63E-01 | 1,00E+00 | Mir1892       | 1,00 | No  |
| ENSMUSG00000106346 | -6,02E-01 | -0,855744577 | 2,33E+00  | 1,27E-01 | 4,46E-01 | Gtpbp4-ps6    | 0,66 | No  |
| ENSMUSG00000106347 | 1,20E+00  | -3,146123991 | 6,74E-01  | 4,12E-01 | 7,07E-01 | Mir5615-1     | 2,30 | No  |
| ENSMUSG00000106348 | 1,36E+00  | -2,929341153 | 8,56E-01  | 3,55E-01 | 6,56E-01 | Mir1a-2       | 2,57 | No  |
| ENSMUSG00000106350 | -3,20E+00 | -2,896154564 | 4,32E+00  | 3,77E-02 | 2,31E-01 | Gm4869        | 0,11 | No  |
| ENSMUSG00000106351 | -9,23E-03 | -1,098150182 | 4,39E-04  | 9,83E-01 | 1,00E+00 | Gm8896        | 0,99 | No  |
| ENSMUSG00000106357 | -8,00E-01 | -0,19567688  | 7,03E+00  | 8,02E-03 | 7,92E-02 | Gm8013        | 0,57 | No  |
| ENSMUSG00000106362 | 1,00E-01  | -0,291315467 | 9,32E-02  | 7,60E-01 | 9,37E-01 | AL672049.1    | 1,07 | No  |
| ENSMUSG00000106364 | -8,31E-02 | -2,088743211 | 1,45E-02  | 9,04E-01 | 1,00E+00 | Gm42994       | 0,94 | No  |
| ENSMUSG00000106365 | -1,30E+00 | -2,146019087 | 2,89E+00  | 8,93E-02 | 3,79E-01 | Gm43568       | 0,41 | No  |
| ENSMUSG00000106366 | -1,50E+00 | -2,831991522 | 1,05E+00  | 3,05E-01 | 6,01E-01 | Mir3069       | 0,35 | No  |
| ENSMUSG00000106371 | 3,14E-02  | -3,107617333 | -7,69E-10 | 1,00E+00 | 1,00E+00 | 9530097N15Rik | 1,02 | No  |
| ENSMUSG00000106373 | 2,88E-03  | 2,136219077  | 3,74E-04  | 9,85E-01 | 1,00E+00 | Gm6522        | 1,00 | No  |
| ENSMUSG00000106374 | -1,22E+00 | -3,146113954 | 6,96E-01  | 4,04E-01 | 7,01E-01 | Gm27680       | 0,43 | No  |
| ENSMUSG00000106375 | -8,54E-02 | 0,984392331  | 1,70E-01  | 6,80E-01 | 8,93E-01 | Gm43361       | 0,94 | No  |
| ENSMUSG00000106377 | 1,87E+00  | -3,107639691 | 1,38E+00  | 2,40E-01 | 5,50E-01 | Gm44300       | 3,67 | No  |
| ENSMUSG00000106379 | -5,93E-02 | -2,896140318 | 1,58E-03  | 9,68E-01 | 1,00E+00 | Lhfp13        | 0,96 | No  |
| ENSMUSG00000106380 | -5,88E-02 | -3,033616507 | 1,62E-03  | 9,68E-01 | 1,00E+00 | Gm3519        | 0,96 | No  |
| ENSMUSG00000106383 | 1,83E-01  | 0,699643163  | 6,23E-01  | 4,30E-01 | 7,23E-01 | E330034L11Rik | 1,14 | No  |
| ENSMUSG00000106385 | -2,70E+00 | -2,963266517 | 2,89E+00  | 8,90E-02 | 3,79E-01 | Gm42943       | 0,15 | No  |
| ENSMUSG00000106390 | -1,51E-01 | 0,514878852  | 4,05E-01  | 5,25E-01 | 8,02E-01 | Gm5551        | 0,90 | No  |

|                    |           |              |           |          |          |         |       |     |
|--------------------|-----------|--------------|-----------|----------|----------|---------|-------|-----|
| ENSMUSG00000106391 | 2,53E-01  | -0,558969285 | 4,00E-01  | 5,27E-01 | 8,04E-01 | Gm42690 | 1,19  | No  |
| ENSMUSG00000106392 | -3,86E-01 | 4,041319906  | 1,92E+01  | 1,20E-05 | 3,96E-04 | Gm5870  | 0,77  | Yes |
| ENSMUSG00000106396 | -3,19E+00 | -2,896111577 | 4,27E+00  | 3,87E-02 | 2,33E-01 | Gm42902 | 0,11  | No  |
| ENSMUSG00000106398 | 3,51E+00  | -2,770631773 | 5,34E+00  | 2,08E-02 | 1,55E-01 | Gm43357 | 11,37 | No  |
| ENSMUSG00000106406 | 1,31E-01  | -1,061015626 | 1,04E-01  | 7,48E-01 | 9,30E-01 | Mir7682 | 1,10  | No  |
| ENSMUSG00000106407 | -1,33E+00 | -3,034349661 | 7,09E-01  | 4,00E-01 | 6,99E-01 | Gm43439 | 0,40  | No  |
| ENSMUSG00000106408 | -1,94E+00 | -3,107619243 | 1,50E+00  | 2,21E-01 | 5,50E-01 | Gm43321 | 0,26  | No  |
| ENSMUSG00000106410 | 4,29E-01  | 1,515739882  | 5,76E+00  | 1,64E-02 | 1,33E-01 | Gm29755 | 1,35  | No  |
| ENSMUSG00000106415 | 2,40E-01  | 0,96464865   | 1,35E+00  | 2,45E-01 | 5,50E-01 | Gm42893 | 1,18  | No  |
| ENSMUSG00000106416 | 3,65E-01  | -1,448752631 | 4,29E-01  | 5,12E-01 | 7,95E-01 | Gm5857  | 1,29  | No  |
| ENSMUSG00000106418 | 5,38E-02  | 0,028010534  | 3,35E-02  | 8,55E-01 | 9,92E-01 | Gm44397 | 1,04  | No  |
| ENSMUSG00000106419 | 2,36E-01  | -1,800970517 | 1,29E-01  | 7,19E-01 | 9,15E-01 | Gm5550  | 1,18  | No  |
| ENSMUSG00000106421 | 3,74E-01  | -2,333122809 | 1,67E-01  | 6,83E-01 | 8,95E-01 | Gm9645  | 1,30  | No  |
| ENSMUSG00000106422 | 3,14E-02  | -3,107617333 | -7,69E-10 | 1,00E+00 | 1,00E+00 | Gm42812 | 1,02  | No  |
| ENSMUSG00000106426 | -7,10E-02 | -2,711726662 | 3,39E-03  | 9,54E-01 | 1,00E+00 | Gm36211 | 0,95  | No  |
| ENSMUSG00000106427 | -2,73E-01 | 3,470201038  | 7,59E+00  | 5,87E-03 | 6,31E-02 | Gm42820 | 0,83  | No  |
| ENSMUSG00000106431 | 8,10E-01  | -2,627688376 | 5,70E-01  | 4,50E-01 | 7,40E-01 | Gm44492 | 1,75  | No  |
| ENSMUSG00000106432 | -7,38E-02 | -3,033659033 | 2,66E-03  | 9,59E-01 | 1,00E+00 | Gm43259 | 0,95  | No  |
| ENSMUSG00000106435 | 1,09E+00  | -2,711710658 | 1,13E+00  | 2,88E-01 | 5,83E-01 | Gm3103  | 2,13  | No  |
| ENSMUSG00000106436 | -4,50E-01 | 0,977423243  | 4,75E+00  | 2,93E-02 | 1,95E-01 | Mir7015 | 0,73  | No  |
| ENSMUSG00000106438 | 1,49E-01  | -0,816495964 | 1,39E-01  | 7,09E-01 | 9,09E-01 | Gm32051 | 1,11  | No  |
| ENSMUSG00000106439 | 1,85E+00  | -3,107657832 | 1,35E+00  | 2,46E-01 | 5,50E-01 | Gm44327 | 3,61  | No  |
| ENSMUSG00000106440 | 1,35E+00  | -2,424857992 | 1,87E+00  | 1,72E-01 | 5,28E-01 | Gm44466 | 2,55  | No  |
| ENSMUSG00000106441 | 2,16E+00  | -2,401396922 | 3,73E+00  | 5,35E-02 | 2,82E-01 | Gm42921 | 4,46  | No  |
| ENSMUSG00000106443 | -1,88E+00 | -2,963263387 | 1,42E+00  | 2,33E-01 | 5,50E-01 | Gm42702 | 0,27  | No  |
| ENSMUSG00000106447 | 3,59E-02  | 2,356847745  | 7,10E-02  | 7,90E-01 | 9,54E-01 | Gm42957 | 1,03  | No  |
| ENSMUSG00000106451 | 4,05E-01  | -0,024866018 | 1,73E+00  | 1,88E-01 | 5,50E-01 | Gm42934 | 1,32  | No  |
| ENSMUSG00000106455 | 3,02E-01  | -2,355615572 | 9,30E-02  | 7,60E-01 | 9,37E-01 | Gm5711  | 1,23  | No  |
| ENSMUSG00000106457 | -1,99E-01 | 1,641174199  | 1,34E+00  | 2,46E-01 | 5,50E-01 | Gm42585 | 0,87  | No  |
| ENSMUSG00000106458 | -1,25E+00 | -2,44866994  | 1,51E+00  | 2,20E-01 | 5,50E-01 | Gm42633 | 0,42  | No  |
| ENSMUSG00000106459 | 1,28E-02  | 1,015262064  | 3,85E-03  | 9,51E-01 | 1,00E+00 | Gm43245 | 1,01  | No  |
| ENSMUSG00000106461 | -9,51E-01 | -2,65505809  | 7,93E-01  | 3,73E-01 | 6,74E-01 | Gm20755 | 0,52  | No  |

|                    |           |              |           |          |          |               |      |    |
|--------------------|-----------|--------------|-----------|----------|----------|---------------|------|----|
| ENSMUSG00000106463 | -1,50E-01 | -1,243620231 | 8,95E-02  | 7,65E-01 | 9,39E-01 | Mir1291       | 0,90 | No |
| ENSMUSG00000106464 | 9,21E-03  | 1,887033173  | 3,68E-03  | 9,52E-01 | 1,00E+00 | C130083M11Rik | 1,01 | No |
| ENSMUSG00000106468 | 5,71E-02  | -1,473262259 | 1,02E-02  | 9,20E-01 | 1,00E+00 | AC122844.1    | 1,04 | No |
| ENSMUSG00000106472 | 1,61E+00  | -2,548207416 | 1,78E+00  | 1,82E-01 | 5,44E-01 | Gm43111       | 3,06 | No |
| ENSMUSG00000106475 | -2,37E-01 | -0,522807165 | 4,68E-01  | 4,94E-01 | 7,80E-01 | Gm43011       | 0,85 | No |
| ENSMUSG00000106476 | -1,94E+00 | -3,107619243 | 1,50E+00  | 2,21E-01 | 5,50E-01 | Rpl36-ps9     | 0,26 | No |
| ENSMUSG00000106477 | 1,79E+00  | -3,033666867 | 1,28E+00  | 2,58E-01 | 5,50E-01 | Gm8874        | 3,46 | No |
| ENSMUSG00000106478 | -3,25E-01 | 2,238105679  | 5,25E+00  | 2,20E-02 | 1,60E-01 | Gm36551       | 0,80 | No |
| ENSMUSG00000106484 | -3,95E-01 | -1,205602693 | 6,54E-01  | 4,19E-01 | 7,14E-01 | Gm17833       | 0,76 | No |
| ENSMUSG00000106486 | -1,73E-01 | 0,768724646  | 5,93E-01  | 4,41E-01 | 7,33E-01 | Gm9771        | 0,89 | No |
| ENSMUSG00000106492 | -5,35E-01 | -2,77061934  | 2,23E-01  | 6,37E-01 | 8,68E-01 | Gm29707       | 0,69 | No |
| ENSMUSG00000106496 | 5,14E-02  | 3,039912051  | 2,10E-01  | 6,47E-01 | 8,74E-01 | Gm7733        | 1,04 | No |
| ENSMUSG00000106497 | -5,14E-01 | -2,015601983 | 4,24E-01  | 5,15E-01 | 7,96E-01 | Gm43195       | 0,70 | No |
| ENSMUSG00000106499 | -8,26E-02 | -1,236586153 | 2,98E-02  | 8,63E-01 | 9,97E-01 | Gm9403        | 0,94 | No |
| ENSMUSG00000106500 | -1,87E+00 | -3,107637761 | 1,39E+00  | 2,38E-01 | 5,50E-01 | Gm42540       | 0,27 | No |
| ENSMUSG00000106511 | 7,63E-01  | -2,896152067 | 3,18E-01  | 5,73E-01 | 8,32E-01 | Gm43521       | 1,70 | No |
| ENSMUSG00000106512 | -1,98E-02 | -3,033655952 | 2,83E-11  | 1,00E+00 | 1,00E+00 | Gm43078       | 0,99 | No |
| ENSMUSG00000106514 | 2,87E-02  | -0,006763727 | 9,26E-03  | 9,23E-01 | 1,00E+00 | Mir6976       | 1,02 | No |
| ENSMUSG00000106515 | 1,87E+00  | -3,107639691 | 1,38E+00  | 2,40E-01 | 5,50E-01 | Gm30382       | 3,67 | No |
| ENSMUSG00000106517 | 2,32E+00  | -2,497706509 | 4,58E+00  | 3,24E-02 | 2,10E-01 | Gm42634       | 5,00 | No |
| ENSMUSG00000106518 | -5,12E-01 | -2,311167725 | 4,19E-01  | 5,17E-01 | 7,98E-01 | Gm42759       | 0,70 | No |
| ENSMUSG00000106520 | -5,87E-02 | -2,548173268 | 3,14E-03  | 9,55E-01 | 1,00E+00 | Gm8706        | 0,96 | No |
| ENSMUSG00000106521 | 1,87E+00  | -3,107639691 | 1,38E+00  | 2,40E-01 | 5,50E-01 | Gm44343       | 3,67 | No |
| ENSMUSG00000106526 | -1,23E+00 | -3,146117124 | 7,12E-01  | 3,99E-01 | 6,98E-01 | Gm42604       | 0,42 | No |
| ENSMUSG00000106527 | -3,20E+00 | -2,831991321 | 4,31E+00  | 3,78E-02 | 2,31E-01 | Gm43671       | 0,11 | No |
| ENSMUSG00000106530 | 1,83E-02  | 2,330377362  | 1,78E-02  | 8,94E-01 | 1,00E+00 | Gm42430       | 1,01 | No |
| ENSMUSG00000106535 | 2,94E-01  | 1,506545501  | 3,02E+00  | 8,24E-02 | 3,69E-01 | Gm43031       | 1,23 | No |
| ENSMUSG00000106536 | 9,01E-03  | -3,107646452 | -5,16E-10 | 1,00E+00 | 1,00E+00 | Gm42508       | 1,01 | No |
| ENSMUSG00000106541 | -1,87E+00 | -3,03364178  | 1,41E+00  | 2,36E-01 | 5,50E-01 | Gm43246       | 0,27 | No |
| ENSMUSG00000106543 | -3,55E+00 | -2,8961404   | 5,65E+00  | 1,74E-02 | 1,38E-01 | Gm43378       | 0,09 | No |
| ENSMUSG00000106547 | 1,85E-02  | 1,079170205  | 8,27E-03  | 9,28E-01 | 1,00E+00 | B230303O12Rik | 1,01 | No |
| ENSMUSG00000106549 | 1,47E-01  | 1,551596544  | 7,16E-01  | 3,98E-01 | 6,98E-01 | Gm42653       | 1,11 | No |

|                    |           |              |          |          |          |               |      |    |
|--------------------|-----------|--------------|----------|----------|----------|---------------|------|----|
| ENSMUSG00000106550 | -3,37E-02 | -0,997886694 | 5,50E-03 | 9,41E-01 | 1,00E+00 | Gm43646       | 0,98 | No |
| ENSMUSG00000106551 | 1,53E-01  | 1,944589834  | 9,76E-01 | 3,23E-01 | 6,23E-01 | Gm1969        | 1,11 | No |
| ENSMUSG00000106553 | 1,09E+00  | -2,548236644 | 1,12E+00 | 2,90E-01 | 5,86E-01 | 6720482G16Rik | 2,12 | No |
| ENSMUSG00000106555 | 5,46E-02  | -0,175650858 | 3,06E-02 | 8,61E-01 | 9,96E-01 | Gm2479        | 1,04 | No |
| ENSMUSG00000106558 | -9,75E-02 | 5,915740811  | 2,17E+00 | 1,40E-01 | 4,73E-01 | Gm5552        | 0,93 | No |
| ENSMUSG00000106561 | -1,28E-01 | 1,946881257  | 7,03E-01 | 4,02E-01 | 7,00E-01 | AC151967.1    | 0,92 | No |
| ENSMUSG00000106562 | -2,68E+00 | -3,033645766 | 2,84E+00 | 9,17E-02 | 3,82E-01 | Gm5981        | 0,16 | No |
| ENSMUSG00000106563 | -1,87E-01 | -1,460758263 | 1,06E-01 | 7,44E-01 | 9,29E-01 | Mir6962       | 0,88 | No |
| ENSMUSG00000106565 | 4,03E-01  | -2,711753603 | 1,26E-01 | 7,22E-01 | 9,17E-01 | Gm43582       | 1,32 | No |
| ENSMUSG00000106566 | 1,26E+00  | -2,448749749 | 2,18E+00 | 1,40E-01 | 4,73E-01 | Gm43836       | 2,40 | No |
| ENSMUSG00000106567 | -3,58E+00 | -2,863680372 | 5,76E+00 | 1,64E-02 | 1,33E-01 | 2010309G21Rik | 0,08 | No |
| ENSMUSG00000106568 | -2,21E-01 | -0,226327424 | 5,34E-01 | 4,65E-01 | 7,54E-01 | Gm42814       | 0,86 | No |
| ENSMUSG00000106572 | 1,73E-01  | 0,236850562  | 3,75E-01 | 5,40E-01 | 8,10E-01 | 4933417G07Rik | 1,13 | No |
| ENSMUSG00000106574 | 6,86E-02  | 6,074967817  | 1,11E+00 | 2,91E-01 | 5,87E-01 | Gm2451        | 1,05 | No |
| ENSMUSG00000106576 | 2,30E+00  | -3,070172745 | 2,02E+00 | 1,55E-01 | 4,99E-01 | Gm4866        | 4,92 | No |
| ENSMUSG00000106577 | 1,81E+00  | -3,10765737  | 1,28E+00 | 2,58E-01 | 5,50E-01 | Gm31026       | 3,49 | No |
| ENSMUSG00000106580 | 1,00E+00  | -2,92932286  | 4,34E-01 | 5,10E-01 | 7,93E-01 | Mir7231       | 2,00 | No |
| ENSMUSG00000106581 | -2,85E-01 | -1,136370495 | 4,17E-01 | 5,18E-01 | 7,98E-01 | Mir7042       | 0,82 | No |
| ENSMUSG00000106583 | -1,23E+00 | -3,146117124 | 7,12E-01 | 3,99E-01 | 6,98E-01 | 4930447N08Rik | 0,42 | No |
| ENSMUSG00000106585 | -3,46E-01 | -2,7408599   | 8,76E-02 | 7,67E-01 | 9,40E-01 | Gm25053       | 0,79 | No |
| ENSMUSG00000106586 | 8,39E-01  | -2,497572255 | 6,13E-01 | 4,34E-01 | 7,27E-01 | 1700013M08Rik | 1,79 | No |
| ENSMUSG00000106587 | 1,33E-02  | 0,672372238  | 3,27E-03 | 9,54E-01 | 1,00E+00 | AC125099.2    | 1,01 | No |
| ENSMUSG00000106588 | -9,81E-02 | -0,641391052 | 7,34E-02 | 7,86E-01 | 9,52E-01 | Gm17590       | 0,93 | No |
| ENSMUSG00000106590 | 4,09E-02  | -1,126777726 | 7,72E-03 | 9,30E-01 | 1,00E+00 | Gm42879       | 1,03 | No |
| ENSMUSG00000106591 | -9,19E-01 | -1,957690463 | 1,86E+00 | 1,73E-01 | 5,30E-01 | AC153872.1    | 0,53 | No |
| ENSMUSG00000106592 | 1,68E+00  | -2,070241577 | 4,39E+00 | 3,61E-02 | 2,25E-01 | Gm43070       | 3,20 | No |
| ENSMUSG00000106595 | -6,73E-01 | -2,740887722 | 3,01E-01 | 5,83E-01 | 8,38E-01 | Gm44314       | 0,63 | No |
| ENSMUSG00000106596 | -1,69E+00 | -2,65509038  | 1,98E+00 | 1,59E-01 | 5,07E-01 | Gm42822       | 0,31 | No |
| ENSMUSG00000106597 | 2,23E-01  | -0,896153895 | 2,57E-01 | 6,12E-01 | 8,52E-01 | Mir7021       | 1,17 | No |
| ENSMUSG00000106599 | 1,87E+00  | -3,107639691 | 1,38E+00 | 2,40E-01 | 5,50E-01 | Ighv1-73      | 3,67 | No |
| ENSMUSG00000106600 | 1,26E-01  | -0,338722148 | 1,47E-01 | 7,01E-01 | 9,05E-01 | Mir6915       | 1,09 | No |
| ENSMUSG00000106607 | -2,74E-01 | -2,070217802 | 1,30E-01 | 7,18E-01 | 9,15E-01 | Gm43178       | 0,83 | No |



|                    |           |              |           |          |          |            |      |     |
|--------------------|-----------|--------------|-----------|----------|----------|------------|------|-----|
| ENSMUSG00000106609 | -5,52E-01 | -1,126743818 | 1,34E+00  | 2,48E-01 | 5,50E-01 | Gm43181    | 0,68 | No  |
| ENSMUSG00000106610 | -3,83E-02 | -3,107651936 | -7,91E-11 | 1,00E+00 | 1,00E+00 | Gm43103    | 0,97 | No  |
| ENSMUSG00000106617 | -4,74E-03 | 1,398733578  | 7,61E-04  | 9,78E-01 | 1,00E+00 | Gm36266    | 1,00 | No  |
| ENSMUSG00000106619 | 2,30E-01  | -0,216156013 | 5,80E-01  | 4,46E-01 | 7,37E-01 | Gm9353     | 1,17 | No  |
| ENSMUSG00000106623 | 7,15E-01  | -1,268173886 | 2,01E+00  | 1,56E-01 | 5,00E-01 | Gm43335    | 1,64 | No  |
| ENSMUSG00000106625 | -8,45E-01 | -2,963241229 | 3,92E-01  | 5,31E-01 | 8,05E-01 | Gm43344    | 0,56 | No  |
| ENSMUSG00000106628 | 1,81E+00  | -3,10765737  | 1,28E+00  | 2,58E-01 | 5,50E-01 | Gm43558    | 3,49 | No  |
| ENSMUSG00000106629 | -4,36E-01 | -2,311158928 | 1,94E-01  | 6,60E-01 | 8,82E-01 | Gm40155    | 0,74 | No  |
| ENSMUSG00000106631 | 8,29E-02  | 1,053815291  | 1,72E-01  | 6,78E-01 | 8,92E-01 | Gm42669    | 1,06 | No  |
| ENSMUSG00000106632 | 1,84E+00  | -3,033632273 | 1,33E+00  | 2,49E-01 | 5,50E-01 | Gm33466    | 3,58 | No  |
| ENSMUSG00000106633 | 4,24E-02  | -3,033592245 | -1,17E-09 | 1,00E+00 | 1,00E+00 | Gm43431    | 1,03 | No  |
| ENSMUSG00000106634 | 2,78E-01  | -1,311273591 | 3,04E-01  | 5,82E-01 | 8,38E-01 | Gm43042    | 1,21 | No  |
| ENSMUSG00000106636 | -1,45E+00 | -0,980346169 | 8,54E+00  | 3,47E-03 | 4,27E-02 | Gm43813    | 0,37 | Yes |
| ENSMUSG00000106639 | -1,14E-02 | -3,033635021 | 1,50E-05  | 9,97E-01 | 1,00E+00 | Gm43121    | 0,99 | No  |
| ENSMUSG00000106640 | 3,14E-02  | -3,107617333 | -7,69E-10 | 1,00E+00 | 1,00E+00 | Gm20940    | 1,02 | No  |
| ENSMUSG00000106643 | 8,69E-01  | -1,278884156 | 2,76E+00  | 9,66E-02 | 3,88E-01 | Gm43422    | 1,83 | No  |
| ENSMUSG00000106648 | 3,07E-01  | -2,655172639 | 9,57E-02  | 7,57E-01 | 9,35E-01 | Gm43176    | 1,24 | No  |
| ENSMUSG00000106649 | 5,43E-02  | -0,737168931 | 1,96E-02  | 8,89E-01 | 1,00E+00 | AC154296.1 | 1,04 | No  |
| ENSMUSG00000106654 | -1,79E-01 | -1,268137895 | 1,24E-01  | 7,25E-01 | 9,18E-01 | Gm2623     | 0,88 | No  |
| ENSMUSG00000106657 | 7,98E-01  | -2,740850828 | 4,49E-01  | 5,03E-01 | 7,88E-01 | AC137678.1 | 1,74 | No  |
| ENSMUSG00000106658 | -8,03E-01 | -2,896132011 | 3,52E-01  | 5,53E-01 | 8,19E-01 | Gm36548    | 0,57 | No  |
| ENSMUSG00000106659 | -8,16E-01 | -2,770582934 | 3,66E-01  | 5,45E-01 | 8,13E-01 | Gm42161    | 0,57 | No  |
| ENSMUSG00000106662 | -6,07E-02 | -1,424893027 | 1,29E-02  | 9,10E-01 | 1,00E+00 | Gm43034    | 0,96 | No  |
| ENSMUSG00000106663 | 1,66E-01  | -1,146147394 | 1,22E-01  | 7,27E-01 | 9,19E-01 | Gm42839    | 1,12 | No  |
| ENSMUSG00000106664 | -4,04E-01 | -1,35551381  | 6,84E-01  | 4,08E-01 | 7,05E-01 | Gm17936    | 0,76 | No  |
| ENSMUSG00000106665 | -2,42E-01 | 0,028238645  | 6,98E-01  | 4,03E-01 | 7,01E-01 | Gm43389    | 0,85 | No  |
| ENSMUSG00000106666 | -1,15E-02 | 2,283102983  | 6,94E-03  | 9,34E-01 | 1,00E+00 | Gm43587    | 0,99 | No  |
| ENSMUSG00000106668 | -1,93E+00 | -3,07014684  | 1,47E+00  | 2,25E-01 | 5,50E-01 | Iglj1      | 0,26 | No  |
| ENSMUSG00000106671 | 4,26E-01  | -2,832058873 | 1,41E-01  | 7,07E-01 | 9,08E-01 | Gm42900    | 1,34 | No  |
| ENSMUSG00000106674 | -1,08E-01 | -2,896148415 | 8,40E-03  | 9,27E-01 | 1,00E+00 | Gm20005    | 0,93 | No  |
| ENSMUSG00000106675 | -2,73E+00 | -2,963241672 | 2,94E+00  | 8,62E-02 | 3,78E-01 | Gm43798    | 0,15 | No  |
| ENSMUSG00000106676 | -2,34E+00 | -2,655123886 | 2,15E+00  | 1,43E-01 | 4,78E-01 | Gm42895    | 0,20 | No  |

|                    |           |              |           |          |          |               |      |     |
|--------------------|-----------|--------------|-----------|----------|----------|---------------|------|-----|
| ENSMUSG00000106678 | 3,10E-01  | 1,210651955  | 2,62E+00  | 1,06E-01 | 3,98E-01 | Gm43457       | 1,24 | No  |
| ENSMUSG00000106680 | 3,31E-01  | -2,497563527 | 1,12E-01  | 7,38E-01 | 9,26E-01 | Gm43852       | 1,26 | No  |
| ENSMUSG00000106682 | 5,90E-02  | -0,065441138 | 3,70E-02  | 8,47E-01 | 9,88E-01 | Gm42648       | 1,04 | No  |
| ENSMUSG00000106688 | -3,87E-01 | -2,896159001 | 9,19E-02  | 7,62E-01 | 9,38E-01 | Gm42851       | 0,76 | No  |
| ENSMUSG00000106691 | -2,33E-01 | -1,785568184 | 1,07E-01  | 7,44E-01 | 9,28E-01 | 2700029L08Rik | 0,85 | No  |
| ENSMUSG00000106696 | -6,42E-02 | 1,362159829  | 1,18E-01  | 7,31E-01 | 9,22E-01 | Gm42729       | 0,96 | No  |
| ENSMUSG00000106698 | 3,24E-01  | 1,480193335  | 3,25E+00  | 7,14E-02 | 3,38E-01 | Gm43599       | 1,25 | No  |
| ENSMUSG00000106702 | 4,07E-02  | 3,382630181  | 1,61E-01  | 6,88E-01 | 8,98E-01 | Gm42846       | 1,03 | No  |
| ENSMUSG00000106706 | 2,15E-01  | -2,226263707 | 6,91E-02  | 7,93E-01 | 9,56E-01 | C530043K16Rik | 1,16 | No  |
| ENSMUSG00000106707 | 1,87E+00  | -3,107639691 | 1,38E+00  | 2,40E-01 | 5,50E-01 | Gm43748       | 3,67 | No  |
| ENSMUSG00000106714 | 1,95E-01  | -1,60072667  | 1,06E-01  | 7,45E-01 | 9,29E-01 | Gm42546       | 1,14 | No  |
| ENSMUSG00000106715 | -1,15E-01 | 1,181587173  | 3,67E-01  | 5,45E-01 | 8,13E-01 | Tmem265       | 0,92 | No  |
| ENSMUSG00000106717 | -3,11E-01 | 0,251951303  | 1,11E+00  | 2,92E-01 | 5,87E-01 | Gm42798       | 0,81 | No  |
| ENSMUSG00000106720 | -4,46E-01 | -2,548173563 | 2,03E-01  | 6,52E-01 | 8,77E-01 | Gm43795       | 0,73 | No  |
| ENSMUSG00000106732 | -7,17E-02 | -2,070152612 | 8,32E-03  | 9,27E-01 | 1,00E+00 | Gm43792       | 0,95 | No  |
| ENSMUSG00000106734 | 2,84E-01  | 5,004523131  | 1,47E+01  | 1,29E-04 | 3,00E-03 | Gm20559       | 1,22 | Yes |
| ENSMUSG00000106736 | -6,25E-02 | -1,655186806 | 1,00E-02  | 9,20E-01 | 1,00E+00 | Gm42573       | 0,96 | No  |
| ENSMUSG00000106737 | 2,88E-01  | -0,015741323 | 8,75E-01  | 3,50E-01 | 6,51E-01 | Gm42962       | 1,22 | No  |
| ENSMUSG00000106739 | 4,06E-01  | -1,289479207 | 4,94E-01  | 4,82E-01 | 7,70E-01 | Gm43499       | 1,33 | No  |
| ENSMUSG00000106743 | -1,71E+00 | -2,268002955 | 3,25E+00  | 7,15E-02 | 3,39E-01 | Gm42847       | 0,30 | No  |
| ENSMUSG00000106751 | -6,19E-01 | -0,236705    | 3,75E+00  | 5,28E-02 | 2,80E-01 | Gm42467       | 0,65 | No  |
| ENSMUSG00000106752 | 1,21E-01  | 3,053700432  | 1,18E+00  | 2,77E-01 | 5,74E-01 | Gm3348        | 1,09 | No  |
| ENSMUSG00000106755 | 2,05E-01  | 6,273726049  | 1,03E+01  | 1,35E-03 | 2,06E-02 | Tpi-rs11      | 1,15 | Yes |
| ENSMUSG00000106757 | -3,15E-01 | 0,079068351  | 1,36E+00  | 2,43E-01 | 5,50E-01 | Gm43482       | 0,80 | No  |
| ENSMUSG00000106758 | -5,34E-02 | -2,146092855 | 3,97E-03  | 9,50E-01 | 1,00E+00 | Gm42731       | 0,96 | No  |
| ENSMUSG00000106760 | 5,97E-03  | -3,1461183   | -3,40E-10 | 1,00E+00 | 1,00E+00 | Gm42802       | 1,00 | No  |
| ENSMUSG00000106764 | 1,87E-01  | -1,614061647 | 1,20E-01  | 7,29E-01 | 9,20E-01 | Gm42529       | 1,14 | No  |
| ENSMUSG00000106767 | 1,58E-01  | 2,63790672   | 1,59E+00  | 2,07E-01 | 5,50E-01 | Gm42727       | 1,12 | No  |
| ENSMUSG00000106772 | -5,76E-01 | -2,355521358 | 2,60E-01  | 6,10E-01 | 8,52E-01 | Gm43794       | 0,67 | No  |
| ENSMUSG00000106773 | -1,94E+00 | -3,107619243 | 1,50E+00  | 2,21E-01 | 5,50E-01 | Gm43799       | 0,26 | No  |
| ENSMUSG00000106783 | -7,19E-02 | -2,311181958 | 5,90E-03  | 9,39E-01 | 1,00E+00 | Gm42105       | 0,95 | No  |
| ENSMUSG00000106785 | -1,34E+00 | -2,600643715 | 1,13E+00  | 2,88E-01 | 5,83E-01 | Gm42713       | 0,39 | No  |

|                    |           |              |          |          |          |               |      |     |
|--------------------|-----------|--------------|----------|----------|----------|---------------|------|-----|
| ENSMUSG00000106797 | 1,14E-01  | 1,595392161  | 4,32E-01 | 5,11E-01 | 7,94E-01 | Gm42936       | 1,08 | No  |
| ENSMUSG00000106798 | -8,35E-01 | -2,711728399 | 3,83E-01 | 5,36E-01 | 8,08E-01 | Gm43275       | 0,56 | No  |
| ENSMUSG00000106799 | 1,16E+00  | -2,600726778 | 1,05E+00 | 3,05E-01 | 6,02E-01 | Gm20756       | 2,23 | No  |
| ENSMUSG00000106801 | -1,39E+00 | -2,896067809 | 1,21E+00 | 2,71E-01 | 5,67E-01 | Gm42852       | 0,38 | No  |
| ENSMUSG00000106802 | -9,14E-01 | -2,655137993 | 7,30E-01 | 3,93E-01 | 6,93E-01 | Gm42885       | 0,53 | No  |
| ENSMUSG00000106803 | -2,28E-01 | 2,08279042   | 2,35E+00 | 1,26E-01 | 4,44E-01 | Gm8930        | 0,85 | No  |
| ENSMUSG00000106807 | 7,77E-01  | -1,832040618 | 1,28E+00 | 2,58E-01 | 5,50E-01 | Gm10441       | 1,71 | No  |
| ENSMUSG00000106810 | -1,71E+00 | -2,740823952 | 2,04E+00 | 1,54E-01 | 4,97E-01 | Gm43600       | 0,31 | No  |
| ENSMUSG00000106812 | 1,87E+00  | -3,107639691 | 1,38E+00 | 2,40E-01 | 5,50E-01 | Gm28563       | 3,67 | No  |
| ENSMUSG00000106813 | -8,90E-01 | -1,929290324 | 1,69E+00 | 1,94E-01 | 5,50E-01 | Gm7181        | 0,54 | No  |
| ENSMUSG00000106815 | 9,84E-01  | 0,838528187  | 1,93E+01 | 1,09E-05 | 3,65E-04 | Gm43658       | 1,98 | Yes |
| ENSMUSG00000106818 | -4,49E-01 | -0,912616194 | 1,12E+00 | 2,89E-01 | 5,85E-01 | Gm43790       | 0,73 | No  |
| ENSMUSG00000106819 | -1,92E+00 | -3,033623267 | 1,46E+00 | 2,27E-01 | 5,50E-01 | Gm43498       | 0,26 | No  |
| ENSMUSG00000106820 | 4,43E-01  | -1,655091415 | 6,54E-01 | 4,19E-01 | 7,14E-01 | D5Ertd605e    | 1,36 | No  |
| ENSMUSG00000106822 | -9,27E-01 | -2,497472058 | 7,53E-01 | 3,86E-01 | 6,87E-01 | Gm43533       | 0,53 | No  |
| ENSMUSG00000106825 | -2,21E-01 | 1,636853527  | 1,66E+00 | 1,97E-01 | 5,50E-01 | 2510016D11Rik | 0,86 | No  |
| ENSMUSG00000106827 | 6,13E-02  | 3,928522143  | 4,62E-01 | 4,97E-01 | 7,82E-01 | Gm7556        | 1,04 | No  |
| ENSMUSG00000106831 | 6,15E-02  | 5,706402213  | 8,27E-01 | 3,63E-01 | 6,64E-01 | Ube2n-ps1     | 1,04 | No  |
| ENSMUSG00000106832 | -1,76E-01 | -1,522928507 | 9,63E-02 | 7,56E-01 | 9,35E-01 | Gm42632       | 0,89 | No  |
| ENSMUSG00000106834 | 2,51E-01  | 0,647025926  | 1,16E+00 | 2,82E-01 | 5,78E-01 | Gm10459       | 1,19 | No  |
| ENSMUSG00000106835 | -7,04E-02 | -2,770618078 | 4,55E-03 | 9,46E-01 | 1,00E+00 | Gm43812       | 0,95 | No  |
| ENSMUSG00000106836 | -2,54E-01 | 0,997789258  | 1,48E+00 | 2,24E-01 | 5,50E-01 | Gm43578       | 0,84 | No  |
| ENSMUSG00000106837 | -5,27E-02 | -2,448610573 | 2,56E-03 | 9,60E-01 | 1,00E+00 | D630030B08Rik | 0,96 | No  |
| ENSMUSG00000106846 | -8,01E-02 | -1,226205067 | 2,70E-02 | 8,69E-01 | 1,00E+00 | Gm42786       | 0,95 | No  |
| ENSMUSG00000106847 | -1,55E-01 | 4,285352352  | 3,47E+00 | 6,27E-02 | 3,12E-01 | Peg13         | 0,90 | No  |
| ENSMUSG00000106853 | -4,47E-01 | 1,206862464  | 5,05E+00 | 2,46E-02 | 1,73E-01 | Gm7492        | 0,73 | No  |
| ENSMUSG00000106856 | -9,02E-01 | -0,726136492 | 5,03E+00 | 2,49E-02 | 1,74E-01 | Gm43761       | 0,54 | No  |
| ENSMUSG00000106858 | 3,24E-01  | 3,134976171  | 8,11E+00 | 4,40E-03 | 5,07E-02 | Gm43844       | 1,25 | No  |
| ENSMUSG00000106859 | -5,24E-02 | -2,963245194 | 1,25E-03 | 9,72E-01 | 1,00E+00 | Gm42737       | 0,96 | No  |
| ENSMUSG00000106864 | 1,62E-02  | 6,054684493  | 6,17E-02 | 8,04E-01 | 9,62E-01 | Gtf3c2        | 1,01 | No  |
| ENSMUSG00000106866 | -1,89E+00 | -3,070171694 | 1,42E+00 | 2,33E-01 | 5,50E-01 | Gm43659       | 0,27 | No  |
| ENSMUSG00000106867 | -7,15E-02 | -1,289474215 | 2,27E-02 | 8,80E-01 | 1,00E+00 | Gm43800       | 0,95 | No  |

|                    |           |              |          |          |          |               |      |     |
|--------------------|-----------|--------------|----------|----------|----------|---------------|------|-----|
| ENSMUSG00000106868 | -1,14E-02 | -3,033635021 | 1,50E-05 | 9,97E-01 | 1,00E+00 | Gm19798       | 0,99 | No  |
| ENSMUSG00000106870 | -3,38E-01 | 1,322160886  | 3,17E+00 | 7,49E-02 | 3,48E-01 | Gm43681       | 0,79 | No  |
| ENSMUSG00000106873 | 2,74E-02  | -3,033621357 | 9,16E-12 | 1,00E+00 | 1,00E+00 | BC049739      | 1,02 | No  |
| ENSMUSG00000106874 | -1,94E-01 | 0,778758706  | 7,90E-01 | 3,74E-01 | 6,75E-01 | Gm20186       | 0,87 | No  |
| ENSMUSG00000106878 | 7,80E-01  | -0,770737662 | 3,39E+00 | 6,54E-02 | 3,21E-01 | Gm17808       | 1,72 | No  |
| ENSMUSG00000106883 | -2,95E-02 | -2,831974433 | 4,69E-04 | 9,83E-01 | 1,00E+00 | Gm34091       | 0,98 | No  |
| ENSMUSG00000106884 | 1,25E-01  | -0,448649268 | 1,32E-01 | 7,16E-01 | 9,13E-01 | Gm20156       | 1,09 | No  |
| ENSMUSG00000106885 | -1,63E-01 | 3,001681386  | 2,11E+00 | 1,46E-01 | 4,84E-01 | Eif3s6-ps4    | 0,89 | No  |
| ENSMUSG00000106888 | 2,62E+00  | -2,770662183 | 2,65E+00 | 1,03E-01 | 3,95E-01 | Gm42848       | 6,13 | No  |
| ENSMUSG00000106889 | 1,88E-01  | 1,602763012  | 1,24E+00 | 2,66E-01 | 5,62E-01 | Gm7463        | 1,14 | No  |
| ENSMUSG00000106891 | -2,39E-01 | 0,023916851  | 7,10E-01 | 3,99E-01 | 6,98E-01 | Gm43460       | 0,85 | No  |
| ENSMUSG00000106892 | 1,46E-01  | 0,136316916  | 2,78E-01 | 5,98E-01 | 8,45E-01 | Gm42791       | 1,11 | No  |
| ENSMUSG00000106894 | 1,53E-01  | -1,879892928 | 5,27E-02 | 8,18E-01 | 9,70E-01 | Gm17130       | 1,11 | No  |
| ENSMUSG00000106895 | -3,73E-01 | 4,343310644  | 2,02E+01 | 7,09E-06 | 2,46E-04 | Gm4754        | 0,77 | Yes |
| ENSMUSG00000106896 | -2,90E+00 | -2,522664194 | 5,67E+00 | 1,73E-02 | 1,37E-01 | G630022F23Rik | 0,13 | No  |
| ENSMUSG00000106898 | 1,26E+00  | -2,71172903  | 9,79E-01 | 3,22E-01 | 6,23E-01 | Gm43125       | 2,39 | No  |
| ENSMUSG00000106899 | -1,94E+00 | -3,107619243 | 1,50E+00 | 2,21E-01 | 5,50E-01 | 1700013A02Rik | 0,26 | No  |
| ENSMUSG00000106902 | 7,44E-01  | -2,896151606 | 3,02E-01 | 5,83E-01 | 8,38E-01 | 4930557J02Rik | 1,68 | No  |
| ENSMUSG00000106904 | 5,82E-01  | 1,147847854  | 8,70E+00 | 3,19E-03 | 4,01E-02 | Gm43029       | 1,50 | Yes |
| ENSMUSG00000106910 | 1,27E+00  | -2,83199681  | 1,01E+00 | 3,16E-01 | 6,16E-01 | Gm16273       | 2,42 | No  |
| ENSMUSG00000106912 | 2,04E-01  | -2,126820406 | 7,92E-02 | 7,78E-01 | 9,47E-01 | Gm43785       | 1,15 | No  |
| ENSMUSG00000106915 | -5,68E-01 | -2,711681357 | 2,52E-01 | 6,15E-01 | 8,54E-01 | Gm42655       | 0,67 | No  |
| ENSMUSG00000106917 | -2,58E-02 | 7,087739473  | 1,81E-01 | 6,70E-01 | 8,88E-01 | Gm7832        | 0,98 | No  |
| ENSMUSG00000106918 | 4,68E-02  | 4,817259193  | 3,78E-01 | 5,39E-01 | 8,09E-01 | Mrpl33        | 1,03 | No  |
| ENSMUSG00000106925 | -5,23E-02 | -2,963267963 | 1,24E-03 | 9,72E-01 | 1,00E+00 | Gm20072       | 0,96 | No  |
| ENSMUSG00000106926 | -1,63E-01 | 7,051679812  | 7,26E+00 | 7,06E-03 | 7,23E-02 | Rpl7-ps7      | 0,89 | No  |
| ENSMUSG00000106927 | -8,39E-01 | -2,770545464 | 3,86E-01 | 5,34E-01 | 8,07E-01 | Gm43598       | 0,56 | No  |
| ENSMUSG00000106928 | 2,01E-01  | 1,973054641  | 1,73E+00 | 1,89E-01 | 5,50E-01 | Gm43860       | 1,15 | No  |
| ENSMUSG00000106930 | -2,81E-01 | 1,993577768  | 3,54E+00 | 5,99E-02 | 3,03E-01 | Gm6450        | 0,82 | No  |
| ENSMUSG00000106933 | -4,08E-01 | 3,390337802  | 1,58E+01 | 7,22E-05 | 1,84E-03 | Gm43621       | 0,75 | Yes |
| ENSMUSG00000106935 | -1,92E+00 | -3,0336536   | 1,46E+00 | 2,27E-01 | 5,50E-01 | Gm19457       | 0,26 | No  |
| ENSMUSG00000106936 | -4,05E-01 | 0,144334988  | 1,99E+00 | 1,59E-01 | 5,06E-01 | Gm7554        | 0,76 | No  |

|                    |           |              |           |          |          |               |      |     |
|--------------------|-----------|--------------|-----------|----------|----------|---------------|------|-----|
| ENSMUSG00000106939 | 2,24E-01  | 0,897043298  | 1,08E+00  | 2,99E-01 | 5,96E-01 | Gm29778       | 1,17 | No  |
| ENSMUSG00000106940 | 1,02E+00  | -1,863803171 | 1,67E+00  | 1,96E-01 | 5,50E-01 | Gm42930       | 2,02 | No  |
| ENSMUSG00000106943 | -6,05E-01 | -0,412813091 | 3,09E+00  | 7,88E-02 | 3,59E-01 | Dancr         | 0,66 | No  |
| ENSMUSG00000106946 | -9,46E-01 | -1,627672252 | 2,80E+00  | 9,42E-02 | 3,84E-01 | Gm42856       | 0,52 | No  |
| ENSMUSG00000106948 | 9,01E-03  | -3,107646452 | -5,16E-10 | 1,00E+00 | 1,00E+00 | Gm42785       | 1,01 | No  |
| ENSMUSG00000106950 | 5,97E-03  | -3,1461183   | -3,40E-10 | 1,00E+00 | 1,00E+00 | 4930478M09Rik | 1,00 | No  |
| ENSMUSG00000106951 | 4,46E-01  | 0,632711042  | 3,39E+00  | 6,56E-02 | 3,21E-01 | 5930430L01Rik | 1,36 | No  |
| ENSMUSG00000106956 | 1,24E+00  | -2,770605879 | 9,57E-01  | 3,28E-01 | 6,29E-01 | Gm19617       | 2,37 | No  |
| ENSMUSG00000106959 | -1,42E-01 | 0,281209966  | 2,84E-01  | 5,94E-01 | 8,43E-01 | Gm42548       | 0,91 | No  |
| ENSMUSG00000106961 | 7,70E-01  | -1,107881299 | 2,92E+00  | 8,74E-02 | 3,78E-01 | Gm43128       | 1,71 | No  |
| ENSMUSG00000106962 | 8,68E-02  | -0,246979471 | 7,90E-02  | 7,79E-01 | 9,47E-01 | Gm43633       | 1,06 | No  |
| ENSMUSG00000106963 | -7,93E-02 | 2,181125432  | 3,19E-01  | 5,72E-01 | 8,32E-01 | Gm8675        | 0,95 | No  |
| ENSMUSG00000106965 | -2,87E-01 | -1,726047403 | 2,05E-01  | 6,50E-01 | 8,76E-01 | Gm18290       | 0,82 | No  |
| ENSMUSG00000106967 | -6,72E-01 | 1,185970747  | 1,23E+01  | 4,51E-04 | 8,43E-03 | Gm42477       | 0,63 | Yes |
| ENSMUSG00000106969 | 1,30E-01  | -1,205899669 | 8,40E-02  | 7,72E-01 | 9,43E-01 | Gm42882       | 1,09 | No  |
| ENSMUSG00000106971 | 2,47E-01  | 0,206646125  | 8,72E-01  | 3,51E-01 | 6,52E-01 | Gm42965       | 1,19 | No  |
| ENSMUSG00000106973 | -1,89E+00 | -3,1076441   | 1,42E+00  | 2,33E-01 | 5,50E-01 | Gm43415       | 0,27 | No  |
| ENSMUSG00000106976 | -5,47E-01 | -2,770630665 | 2,34E-01  | 6,29E-01 | 8,62E-01 | Gm42963       | 0,68 | No  |
| ENSMUSG00000106978 | 9,69E-02  | -0,18556669  | 9,21E-02  | 7,61E-01 | 9,38E-01 | N4bp2os       | 1,07 | No  |
| ENSMUSG00000106980 | 1,12E-01  | -2,033698229 | 2,75E-02  | 8,68E-01 | 1,00E+00 | Gm43690       | 1,08 | No  |
| ENSMUSG00000106981 | -6,95E-02 | -0,268143321 | 4,59E-02  | 8,30E-01 | 9,77E-01 | Gm45495       | 0,95 | No  |
| ENSMUSG00000106986 | -3,17E-01 | -1,289523397 | 4,34E-01  | 5,10E-01 | 7,93E-01 | Gm42887       | 0,80 | No  |
| ENSMUSG00000106988 | 8,19E-02  | 5,576006067  | 1,43E+00  | 2,32E-01 | 5,50E-01 | Tsg101-ps     | 1,06 | No  |
| ENSMUSG00000106989 | 6,42E-01  | -1,997992932 | 8,38E-01  | 3,60E-01 | 6,61E-01 | Gm5989        | 1,56 | No  |
| ENSMUSG00000106990 | 2,20E-01  | 2,401320083  | 2,99E+00  | 8,40E-02 | 3,71E-01 | Gm42547       | 1,17 | No  |
| ENSMUSG00000106992 | 1,37E+00  | -2,355595105 | 1,91E+00  | 1,67E-01 | 5,20E-01 | Gm43167       | 2,58 | No  |
| ENSMUSG00000106993 | -4,13E-01 | -2,448633118 | 1,75E-01  | 6,76E-01 | 8,91E-01 | Gm43417       | 0,75 | No  |
| ENSMUSG00000107000 | 7,48E-02  | 0,501936313  | 1,05E-01  | 7,46E-01 | 9,29E-01 | Gm43481       | 1,05 | No  |
| ENSMUSG00000107002 | 1,84E-01  | 5,600644568  | 7,25E+00  | 7,09E-03 | 7,25E-02 | 0610012G03Rik | 1,14 | No  |
| ENSMUSG00000107005 | -7,34E-01 | -2,311139711 | 6,03E-01  | 4,37E-01 | 7,30E-01 | 9030607J07Rik | 0,60 | No  |
| ENSMUSG00000107006 | 1,60E-01  | 2,089095979  | 1,16E+00  | 2,82E-01 | 5,78E-01 | Gm43105       | 1,12 | No  |
| ENSMUSG00000107008 | 1,87E+00  | -3,107639691 | 1,38E+00  | 2,40E-01 | 5,50E-01 | Gm2762        | 3,67 | No  |

|                    |           |              |           |          |          |               |      |    |
|--------------------|-----------|--------------|-----------|----------|----------|---------------|------|----|
| ENSMUSG00000107009 | -5,76E-02 | -2,548237687 | 3,03E-03  | 9,56E-01 | 1,00E+00 | 6720475M21Rik | 0,96 | No |
| ENSMUSG00000107011 | 8,61E-01  | -3,082814989 | 4,28E-01  | 5,13E-01 | 7,95E-01 | Gm42906       | 1,82 | No |
| ENSMUSG00000107012 | -5,62E-02 | 1,528540731  | 1,04E-01  | 7,47E-01 | 9,30E-01 | 4930528J11Rik | 0,96 | No |
| ENSMUSG00000107015 | -1,89E+00 | -2,896152932 | 1,43E+00  | 2,31E-01 | 5,50E-01 | 2900076G11Rik | 0,27 | No |
| ENSMUSG00000107017 | 2,52E-02  | -0,614088902 | 4,45E-03  | 9,47E-01 | 1,00E+00 | Gm43196       | 1,02 | No |
| ENSMUSG00000107018 | -8,22E-01 | -2,033518273 | 1,61E+00  | 2,05E-01 | 5,50E-01 | Gm43694       | 0,57 | No |
| ENSMUSG00000107019 | 6,97E-02  | 1,492818086  | 1,56E-01  | 6,92E-01 | 9,01E-01 | Gm43682       | 1,05 | No |
| ENSMUSG00000107020 | -2,39E-01 | 0,922920759  | 1,19E+00  | 2,74E-01 | 5,71E-01 | Gm6051        | 0,85 | No |
| ENSMUSG00000107022 | -9,25E-01 | -2,548188211 | 7,49E-01  | 3,87E-01 | 6,87E-01 | Gm36669       | 0,53 | No |
| ENSMUSG00000107023 | 4,16E-02  | 6,163520324  | 4,18E-01  | 5,18E-01 | 7,98E-01 | Gm42715       | 1,03 | No |
| ENSMUSG00000107026 | 1,85E+00  | -3,107657832 | 1,35E+00  | 2,46E-01 | 5,50E-01 | Gm7504        | 3,61 | No |
| ENSMUSG00000107028 | 6,34E-03  | 3,927818949  | 4,88E-03  | 9,44E-01 | 1,00E+00 | Gm5043        | 1,00 | No |
| ENSMUSG00000107030 | -1,90E+00 | -3,033594154 | 1,44E+00  | 2,30E-01 | 5,50E-01 | Gm5291        | 0,27 | No |
| ENSMUSG00000107032 | -5,69E-01 | -1,800870886 | 7,07E-01  | 4,00E-01 | 6,99E-01 | Gm44942       | 0,67 | No |
| ENSMUSG00000107035 | 6,77E-02  | 6,886088976  | 1,22E+00  | 2,69E-01 | 5,65E-01 | Ybx1-ps2      | 1,05 | No |
| ENSMUSG00000107040 | -1,57E-01 | 1,581576711  | 8,78E-01  | 3,49E-01 | 6,50E-01 | Gm43791       | 0,90 | No |
| ENSMUSG00000107041 | 2,22E-01  | -0,344363207 | 4,54E-01  | 5,01E-01 | 7,86E-01 | Gm42735       | 1,17 | No |
| ENSMUSG00000107043 | -9,11E-01 | -2,832006072 | 5,90E-01  | 4,42E-01 | 7,34E-01 | Gm42849       | 0,53 | No |
| ENSMUSG00000107045 | -1,37E+00 | -2,226287932 | 2,59E+00  | 1,07E-01 | 4,01E-01 | Gm43636       | 0,39 | No |
| ENSMUSG00000107048 | -1,34E+00 | -2,711700753 | 1,12E+00  | 2,89E-01 | 5,85E-01 | Gm43807       | 0,40 | No |
| ENSMUSG00000107050 | -1,22E+00 | -1,641213781 | 3,82E+00  | 5,08E-02 | 2,73E-01 | C030017G13Rik | 0,43 | No |
| ENSMUSG00000107054 | -2,04E+00 | -2,548238935 | 3,15E+00  | 7,60E-02 | 3,52E-01 | C730045M19Rik | 0,24 | No |
| ENSMUSG00000107061 | -2,71E+00 | -2,963235336 | 2,92E+00  | 8,75E-02 | 3,78E-01 | Gm19590       | 0,15 | No |
| ENSMUSG00000107062 | 8,16E-02  | -2,333182304 | 8,81E-03  | 9,25E-01 | 1,00E+00 | Gm43580       | 1,06 | No |
| ENSMUSG00000107066 | 1,56E-01  | 2,904025432  | 1,87E+00  | 1,72E-01 | 5,28E-01 | Gm4482        | 1,11 | No |
| ENSMUSG00000107068 | -3,25E-02 | 3,861458076  | 1,27E-01  | 7,21E-01 | 9,16E-01 | Gm42742       | 0,98 | No |
| ENSMUSG00000107071 | -2,88E-03 | 2,375391923  | 4,53E-04  | 9,83E-01 | 1,00E+00 | Gm42420       | 1,00 | No |
| ENSMUSG00000107075 | -8,64E-01 | -2,831928746 | 4,09E-01  | 5,23E-01 | 8,01E-01 | Gm43068       | 0,55 | No |
| ENSMUSG00000107076 | 1,20E+00  | -2,89614401  | 8,87E-01  | 3,46E-01 | 6,47E-01 | Gm43480       | 2,30 | No |
| ENSMUSG00000107078 | 5,97E-03  | -3,1461183   | -3,40E-10 | 1,00E+00 | 1,00E+00 | Gm36840       | 1,00 | No |
| ENSMUSG00000107079 | -5,78E-01 | -2,247025174 | 5,92E-01  | 4,42E-01 | 7,34E-01 | Gm35648       | 0,67 | No |
| ENSMUSG00000107081 | 1,17E-01  | -0,567614847 | 1,05E-01  | 7,46E-01 | 9,29E-01 | Gm43701       | 1,08 | No |

|                    |           |              |           |          |          |               |      |    |
|--------------------|-----------|--------------|-----------|----------|----------|---------------|------|----|
| ENSMUSG00000107082 | -1,89E+00 | -3,1076441   | 1,42E+00  | 2,33E-01 | 5,50E-01 | Gm36378       | 0,27 | No |
| ENSMUSG00000107083 | -5,13E-01 | -0,448582323 | 2,27E+00  | 1,32E-01 | 4,57E-01 | Gm43313       | 0,70 | No |
| ENSMUSG00000107085 | -8,61E-01 | -2,711731801 | 4,05E-01  | 5,24E-01 | 8,01E-01 | Gm42883       | 0,55 | No |
| ENSMUSG00000107086 | 5,02E-02  | 2,877833001  | 1,82E-01  | 6,70E-01 | 8,88E-01 | Gm43808       | 1,04 | No |
| ENSMUSG00000107087 | 1,87E+00  | -3,107639691 | 1,38E+00  | 2,40E-01 | 5,50E-01 | Gm34411       | 3,67 | No |
| ENSMUSG00000107090 | -1,39E-01 | 0,652887867  | 3,68E-01  | 5,44E-01 | 8,13E-01 | Gm42884       | 0,91 | No |
| ENSMUSG00000107091 | 7,67E-01  | -2,963261668 | 3,24E-01  | 5,69E-01 | 8,30E-01 | Gm43343       | 1,70 | No |
| ENSMUSG00000107092 | 4,36E-02  | 5,78857539   | 4,21E-01  | 5,17E-01 | 7,97E-01 | Gm7993        | 1,03 | No |
| ENSMUSG00000107094 | 2,10E-01  | 1,19514524   | 1,06E+00  | 3,03E-01 | 5,99E-01 | Gm43294       | 1,16 | No |
| ENSMUSG00000107096 | -3,79E-01 | -1,424886811 | 5,18E-01  | 4,72E-01 | 7,60E-01 | Gm43597       | 0,77 | No |
| ENSMUSG00000107102 | -4,95E-01 | -1,355514287 | 9,62E-01  | 3,27E-01 | 6,27E-01 | Gm42726       | 0,71 | No |
| ENSMUSG00000107103 | -2,24E+00 | -2,448635117 | 4,07E+00  | 4,36E-02 | 2,49E-01 | Gm43164       | 0,21 | No |
| ENSMUSG00000107105 | -7,69E-02 | -2,963220349 | 2,69E-03  | 9,59E-01 | 1,00E+00 | Gm15820       | 0,95 | No |
| ENSMUSG00000107106 | -4,13E-02 | -3,033659495 | 7,08E-04  | 9,79E-01 | 1,00E+00 | Gm43760       | 0,97 | No |
| ENSMUSG00000107109 | -4,86E-02 | -2,896158361 | 1,09E-03  | 9,74E-01 | 1,00E+00 | Gm42571       | 0,97 | No |
| ENSMUSG00000107110 | -2,75E+00 | -2,963216826 | 2,99E+00  | 8,38E-02 | 3,71E-01 | Gm42931       | 0,15 | No |
| ENSMUSG00000107111 | 4,22E-02  | 0,036598319  | 2,05E-02  | 8,86E-01 | 1,00E+00 | Gm40304       | 1,03 | No |
| ENSMUSG00000107112 | -1,87E+00 | -3,107637761 | 1,39E+00  | 2,38E-01 | 5,50E-01 | Gm36241       | 0,27 | No |
| ENSMUSG00000107115 | -6,89E-01 | -1,770640502 | 1,08E+00  | 2,98E-01 | 5,94E-01 | Gm43052       | 0,62 | No |
| ENSMUSG00000107116 | -6,19E-01 | -1,268049697 | 1,19E+00  | 2,76E-01 | 5,73E-01 | Gm43274       | 0,65 | No |
| ENSMUSG00000107118 | -7,00E-01 | 0,379411472  | 7,22E+00  | 7,22E-03 | 7,35E-02 | Gm42986       | 0,62 | No |
| ENSMUSG00000107120 | -7,47E-02 | -0,215904231 | 6,30E-02  | 8,02E-01 | 9,61E-01 | Gm43059       | 0,95 | No |
| ENSMUSG00000107121 | -5,13E-02 | -0,51000615  | 2,01E-02  | 8,87E-01 | 1,00E+00 | 1110006O24Rik | 0,97 | No |
| ENSMUSG00000107123 | -1,87E+00 | -3,107637761 | 1,39E+00  | 2,38E-01 | 5,50E-01 | Vmn2r-ps25    | 0,27 | No |
| ENSMUSG00000107127 | -1,27E+00 | -3,033654349 | 7,35E-01  | 3,91E-01 | 6,91E-01 | Gm6719        | 0,41 | No |
| ENSMUSG00000107128 | -6,43E-01 | -1,65506876  | 1,28E+00  | 2,57E-01 | 5,50E-01 | Gm42867       | 0,64 | No |
| ENSMUSG00000107133 | -3,83E-02 | -3,107651936 | -7,91E-11 | 1,00E+00 | 1,00E+00 | Gm42787       | 0,97 | No |
| ENSMUSG00000107134 | -4,13E-02 | -3,033659495 | 7,08E-04  | 9,79E-01 | 1,00E+00 | Gm42528       | 0,97 | No |
| ENSMUSG00000107136 | -1,87E+00 | -3,107637761 | 1,39E+00  | 2,38E-01 | 5,50E-01 | Gm42466       | 0,27 | No |
| ENSMUSG00000107140 | -3,56E+00 | -2,896109226 | 5,70E+00  | 1,70E-02 | 1,36E-01 | Gm43811       | 0,08 | No |
| ENSMUSG00000107142 | 8,02E-02  | -0,871784448 | 3,63E-02  | 8,49E-01 | 9,88E-01 | 4930566F21Rik | 1,06 | No |
| ENSMUSG00000107143 | -3,95E-01 | 1,011025654  | 3,42E+00  | 6,44E-02 | 3,18E-01 | Gm6598        | 0,76 | No |

|                    |           |              |           |          |          |               |      |    |
|--------------------|-----------|--------------|-----------|----------|----------|---------------|------|----|
| ENSMUSG00000107145 | 6,66E-02  | 3,155889508  | 3,81E-01  | 5,37E-01 | 8,09E-01 | Gm43442       | 1,05 | No |
| ENSMUSG00000107149 | 3,07E-01  | -2,49763895  | 9,61E-02  | 7,57E-01 | 9,35E-01 | Gm30708       | 1,24 | No |
| ENSMUSG00000107151 | -1,01E+00 | -2,355510957 | 1,58E+00  | 2,08E-01 | 5,50E-01 | Gm43810       | 0,50 | No |
| ENSMUSG00000107152 | -1,87E+00 | -3,107637761 | 1,39E+00  | 2,38E-01 | 5,50E-01 | Gm43152       | 0,27 | No |
| ENSMUSG00000107153 | -8,42E-01 | -2,896131633 | 3,89E-01  | 5,33E-01 | 8,06E-01 | Gm38404       | 0,56 | No |
| ENSMUSG00000107154 | -3,83E-02 | -3,107651936 | -7,91E-11 | 1,00E+00 | 1,00E+00 | Gm7041        | 0,97 | No |
| ENSMUSG00000107155 | 7,04E-01  | -1,497713252 | 1,34E+00  | 2,48E-01 | 5,50E-01 | Gm43793       | 1,63 | No |
| ENSMUSG00000107157 | -9,84E-02 | 3,050813542  | 7,76E-01  | 3,78E-01 | 6,79E-01 | Gm3170        | 0,93 | No |
| ENSMUSG00000107158 | -2,45E+00 | -2,448644932 | 5,20E+00  | 2,26E-02 | 1,63E-01 | Gm42728       | 0,18 | No |
| ENSMUSG00000107160 | -1,14E+00 | -2,998021524 | 5,62E-01  | 4,53E-01 | 7,43E-01 | Gm42666       | 0,45 | No |
| ENSMUSG00000107161 | 2,56E-01  | -0,561349825 | 4,79E-01  | 4,89E-01 | 7,76E-01 | Gm43850       | 1,19 | No |
| ENSMUSG00000107164 | 1,84E+00  | -3,033649193 | 1,33E+00  | 2,49E-01 | 5,50E-01 | 4933425D22Rik | 3,58 | No |
| ENSMUSG00000107165 | -2,15E-01 | -1,311091577 | 2,05E-01  | 6,50E-01 | 8,76E-01 | Gm43747       | 0,86 | No |
| ENSMUSG00000107167 | -3,83E-02 | -3,107651936 | -7,91E-11 | 1,00E+00 | 1,00E+00 | Gm34653       | 0,97 | No |
| ENSMUSG00000107168 | 1,17E+00  | -2,49757534  | 1,07E+00  | 3,00E-01 | 5,96E-01 | Gm42507       | 2,25 | No |
| ENSMUSG00000107169 | 4,37E-02  | 7,463545505  | 5,41E-01  | 4,62E-01 | 7,51E-01 | Gm43796       | 1,03 | No |
| ENSMUSG00000107171 | 1,67E-01  | 0,758020667  | 5,59E-01  | 4,55E-01 | 7,44E-01 | Gm42572       | 1,12 | No |
| ENSMUSG00000107173 | -3,88E-01 | -2,401384656 | 1,90E-01  | 6,63E-01 | 8,83E-01 | Gm43266       | 0,76 | No |
| ENSMUSG00000107176 | -1,40E-01 | 9,353222111  | 6,11E+00  | 1,35E-02 | 1,16E-01 | Gm9794        | 0,91 | No |
| ENSMUSG00000107178 | -5,43E-01 | -1,378215657 | 1,17E+00  | 2,79E-01 | 5,75E-01 | Gm42531       | 0,69 | No |
| ENSMUSG00000107179 | -4,13E-02 | -0,888036409 | 9,67E-03  | 9,22E-01 | 1,00E+00 | Gm43069       | 0,97 | No |
| ENSMUSG00000107182 | 1,15E-01  | -0,24714565  | 1,37E-01  | 7,12E-01 | 9,11E-01 | Gm43268       | 1,08 | No |
| ENSMUSG00000107184 | 1,87E+00  | -3,107639691 | 1,38E+00  | 2,40E-01 | 5,50E-01 | Gm18222       | 3,67 | No |
| ENSMUSG00000107189 | -1,87E+00 | -3,107637761 | 1,39E+00  | 2,38E-01 | 5,50E-01 | Gm42689       | 0,27 | No |
| ENSMUSG00000107191 | -2,36E-02 | 3,921328818  | 6,80E-02  | 7,94E-01 | 9,56E-01 | Gm43579       | 0,98 | No |
| ENSMUSG00000107194 | 3,19E-01  | -1,485354188 | 3,20E-01  | 5,71E-01 | 8,32E-01 | Gm43173       | 1,25 | No |
| ENSMUSG00000107195 | 5,93E-01  | -1,401297913 | 1,38E+00  | 2,40E-01 | 5,50E-01 | 4930589O11Rik | 1,51 | No |
| ENSMUSG00000107197 | -3,15E-01 | -1,311154579 | 3,52E-01  | 5,53E-01 | 8,19E-01 | Gm43312       | 0,80 | No |
| ENSMUSG00000107198 | 1,81E+00  | -3,10765737  | 1,28E+00  | 2,58E-01 | 5,50E-01 | Gm19619       | 3,49 | No |
| ENSMUSG00000107200 | -3,31E-01 | 1,765809713  | 4,27E+00  | 3,89E-02 | 2,34E-01 | Gm43039       | 0,80 | No |
| ENSMUSG00000107201 | 3,22E-01  | -0,548329574 | 7,18E-01  | 3,97E-01 | 6,97E-01 | 5930420M18Rik | 1,25 | No |
| ENSMUSG00000107203 | 1,11E+00  | -2,497546114 | 1,18E+00  | 2,78E-01 | 5,74E-01 | Gm7542        | 2,16 | No |



|                    |           |              |           |          |          |               |  |      |     |
|--------------------|-----------|--------------|-----------|----------|----------|---------------|--|------|-----|
| ENSMUSG00000107204 | 1,86E+00  | -3,033661846 | 1,35E+00  | 2,46E-01 | 5,50E-01 | Gm43067       |  | 3,62 | No  |
| ENSMUSG00000107205 | 4,34E-01  | -1,473023218 | 6,26E-01  | 4,29E-01 | 7,23E-01 | Gm42576       |  | 1,35 | No  |
| ENSMUSG00000107206 | 4,41E-01  | -2,711718299 | 1,52E-01  | 6,97E-01 | 9,03E-01 | Gm42736       |  | 1,36 | No  |
| ENSMUSG00000107211 | 3,88E-01  | 3,049965928  | 1,17E+01  | 6,39E-04 | 1,12E-02 | Gm5864        |  | 1,31 | Yes |
| ENSMUSG00000107215 | 3,62E-01  | 2,033719294  | 5,88E+00  | 1,53E-02 | 1,28E-01 | Gm43197       |  | 1,29 | No  |
| ENSMUSG00000107216 | 4,10E-01  | -1,185710242 | 7,36E-01  | 3,91E-01 | 6,91E-01 | 2210412B16Rik |  | 1,33 | No  |
| ENSMUSG00000107220 | 7,25E-01  | -2,896140173 | 2,86E-01  | 5,93E-01 | 8,42E-01 | Gm9555        |  | 1,65 | No  |
| ENSMUSG00000107222 | -3,26E-02 | 1,06465284   | 2,44E-02  | 8,76E-01 | 1,00E+00 | Gm43198       |  | 0,98 | No  |
| ENSMUSG00000107225 | -2,94E-01 | -2,267988734 | 1,29E-01  | 7,19E-01 | 9,15E-01 | Gm43637       |  | 0,82 | No  |
| ENSMUSG00000107227 | 5,67E-01  | -0,033722243 | 3,32E+00  | 6,83E-02 | 3,29E-01 | Gm42559       |  | 1,48 | No  |
| ENSMUSG00000107230 | -3,45E-01 | 0,542327629  | 2,04E+00  | 1,53E-01 | 4,96E-01 | Gm19265       |  | 0,79 | No  |
| ENSMUSG00000107233 | 1,93E+00  | -2,711727705 | 2,79E+00  | 9,47E-02 | 3,85E-01 | Gm42959       |  | 3,82 | No  |
| ENSMUSG00000107241 | -1,89E+00 | -3,1076441   | 1,42E+00  | 2,33E-01 | 5,50E-01 | Gm43129       |  | 0,27 | No  |
| ENSMUSG00000107246 | -4,30E-01 | -2,548218057 | 1,88E-01  | 6,64E-01 | 8,84E-01 | Gm42560       |  | 0,74 | No  |
| ENSMUSG00000107252 | -2,65E+00 | -2,770587992 | 2,81E+00  | 9,35E-02 | 3,83E-01 | Gm43786       |  | 0,16 | No  |
| ENSMUSG00000107253 | 2,01E-02  | -0,098266813 | 4,36E-03  | 9,47E-01 | 1,00E+00 | Gm43634       |  | 1,01 | No  |
| ENSMUSG00000107254 | -8,75E-01 | -2,31119216  | 1,37E+00  | 2,41E-01 | 5,50E-01 | Gm43769       |  | 0,55 | No  |
| ENSMUSG00000107255 | -9,89E-01 | -3,011439008 | 3,75E-01  | 5,41E-01 | 8,11E-01 | Gm43416       |  | 0,50 | No  |
| ENSMUSG00000107256 | 2,64E+00  | -3,033673223 | 2,69E+00  | 1,01E-01 | 3,92E-01 | Gm13821       |  | 6,23 | No  |
| ENSMUSG00000107257 | -1,78E-01 | 2,846614278  | 2,38E+00  | 1,23E-01 | 4,37E-01 | Gm43028       |  | 0,88 | No  |
| ENSMUSG00000107259 | 2,66E-02  | 1,111940765  | 1,82E-02  | 8,93E-01 | 1,00E+00 | Gm5298        |  | 1,02 | No  |
| ENSMUSG00000107261 | -2,23E-01 | 1,422752792  | 1,54E+00  | 2,15E-01 | 5,50E-01 | Trmt112-ps1   |  | 0,86 | No  |
| ENSMUSG00000107262 | -1,98E-02 | -3,033655952 | 2,83E-11  | 1,00E+00 | 1,00E+00 | Gm18753       |  | 0,99 | No  |
| ENSMUSG00000107263 | 1,86E+00  | -2,89610885  | 1,35E+00  | 2,46E-01 | 5,50E-01 | Gm42471       |  | 3,63 | No  |
| ENSMUSG00000107265 | 1,16E+00  | -3,107654653 | 6,40E-01  | 4,24E-01 | 7,18E-01 | Gm15469       |  | 2,23 | No  |
| ENSMUSG00000107266 | 9,01E-03  | -3,107646452 | -5,16E-10 | 1,00E+00 | 1,00E+00 | Gm43698       |  | 1,01 | No  |
| ENSMUSG00000107276 | -2,57E-01 | -0,963252605 | 3,78E-01  | 5,39E-01 | 8,09E-01 | Gm42858       |  | 0,84 | No  |
| ENSMUSG00000107277 | 1,64E-01  | -1,247045232 | 1,02E-01  | 7,50E-01 | 9,31E-01 | Gm10461       |  | 1,12 | No  |
| ENSMUSG00000107278 | 4,31E-01  | 0,028120193  | 2,09E+00  | 1,48E-01 | 4,88E-01 | Gm42600       |  | 1,35 | No  |
| ENSMUSG00000107283 | 4,39E-02  | 4,710538453  | 3,25E-01  | 5,69E-01 | 8,30E-01 | Mpv17         |  | 1,03 | No  |
| ENSMUSG00000107286 | 4,61E-01  | -2,448649875 | 1,65E-01  | 6,84E-01 | 8,96E-01 | Gm43788       |  | 1,38 | No  |
| ENSMUSG00000107287 | 2,57E+00  | -3,0336723   | 2,56E+00  | 1,10E-01 | 4,06E-01 | Gm43458       |  | 5,96 | No  |

|                    |           |              |          |          |          |               |      |     |
|--------------------|-----------|--------------|----------|----------|----------|---------------|------|-----|
| ENSMUSG00000107288 | -3,71E-01 | -2,548177453 | 1,74E-01 | 6,77E-01 | 8,92E-01 | Gm42903       | 0,77 | No  |
| ENSMUSG00000107292 | -5,16E-01 | 0,07086329   | 3,32E+00 | 6,85E-02 | 3,29E-01 | Gm42733       | 0,70 | No  |
| ENSMUSG00000107300 | 1,37E-01  | -0,800877491 | 9,00E-02 | 7,64E-01 | 9,39E-01 | Gm43279       | 1,10 | No  |
| ENSMUSG00000107304 | -2,91E-01 | -2,146020421 | 1,27E-01 | 7,21E-01 | 9,16E-01 | Gm43775       | 0,82 | No  |
| ENSMUSG00000107306 | 1,09E+00  | -1,226434421 | 5,22E+00 | 2,23E-02 | 1,62E-01 | Gm42577       | 2,12 | No  |
| ENSMUSG00000107310 | 3,21E-01  | 1,291256714  | 3,03E+00 | 8,18E-02 | 3,67E-01 | Gm7452        | 1,25 | No  |
| ENSMUSG00000107313 | -1,63E-01 | -2,146110802 | 5,07E-02 | 8,22E-01 | 9,72E-01 | Gm43332       | 0,89 | No  |
| ENSMUSG00000107314 | -1,21E+00 | -3,107627547 | 6,96E-01 | 4,04E-01 | 7,01E-01 | Gm20488       | 0,43 | No  |
| ENSMUSG00000107317 | 2,08E-01  | 6,075582102  | 1,01E+01 | 1,48E-03 | 2,21E-02 | Gm19719       | 1,16 | Yes |
| ENSMUSG00000107319 | 8,04E-02  | 0,569178267  | 1,07E-01 | 7,44E-01 | 9,29E-01 | Gm42670       | 1,06 | No  |
| ENSMUSG00000107320 | 2,07E-03  | 1,88990931   | 1,94E-04 | 9,89E-01 | 1,00E+00 | Gm42549       | 1,00 | No  |
| ENSMUSG00000107325 | -1,38E+00 | -2,107530675 | 2,61E+00 | 1,06E-01 | 3,99E-01 | Gm43425       | 0,38 | No  |
| ENSMUSG00000107327 | -2,66E-01 | 0,445420835  | 1,07E+00 | 3,00E-01 | 5,97E-01 | Gm7478        | 0,83 | No  |
| ENSMUSG00000107331 | -5,99E-02 | 1,236858709  | 1,03E-01 | 7,48E-01 | 9,30E-01 | Gm42732       | 0,96 | No  |
| ENSMUSG00000107335 | 1,00E-01  | 1,33792328   | 2,94E-01 | 5,87E-01 | 8,40E-01 | Gm43372       | 1,07 | No  |
| ENSMUSG00000107336 | -6,45E-01 | -1,236462348 | 2,13E+00 | 1,45E-01 | 4,81E-01 | Gm43461       | 0,64 | No  |
| ENSMUSG00000107340 | 9,03E-01  | -1,522729941 | 2,88E+00 | 8,96E-02 | 3,80E-01 | Gm42789       | 1,87 | No  |
| ENSMUSG00000107344 | -1,89E+00 | -3,1076441   | 1,42E+00 | 2,33E-01 | 5,50E-01 | Gm2559        | 0,27 | No  |
| ENSMUSG00000107352 | -1,43E-02 | 2,085160116  | 9,88E-03 | 9,21E-01 | 1,00E+00 | Gm43660       | 0,99 | No  |
| ENSMUSG00000107354 | -7,30E-02 | -2,185552473 | 9,91E-03 | 9,21E-01 | 1,00E+00 | Gm43040       | 0,95 | No  |
| ENSMUSG00000107355 | 3,10E-02  | 1,81675208   | 3,82E-02 | 8,45E-01 | 9,86E-01 | AI839979      | 1,02 | No  |
| ENSMUSG00000107358 | 7,25E-01  | -2,65510882  | 2,87E-01 | 5,92E-01 | 8,42E-01 | Gm43168       | 1,65 | No  |
| ENSMUSG00000107362 | -1,31E+00 | -1,289315183 | 6,02E+00 | 1,41E-02 | 1,21E-01 | Gm40309       | 0,40 | No  |
| ENSMUSG00000107364 | -1,10E+00 | -1,332940897 | 3,59E+00 | 5,80E-02 | 2,97E-01 | Gm43051       | 0,47 | No  |
| ENSMUSG00000107365 | -7,20E-02 | -2,655113328 | 4,73E-03 | 9,45E-01 | 1,00E+00 | Gm43479       | 0,95 | No  |
| ENSMUSG00000107368 | -2,97E-02 | -1,485228394 | 2,94E-03 | 9,57E-01 | 1,00E+00 | 1700018A23Rik | 0,98 | No  |
| ENSMUSG00000107369 | -1,37E-01 | 6,055161493  | 4,43E+00 | 3,53E-02 | 2,22E-01 | Gstm2-ps1     | 0,91 | No  |
| ENSMUSG00000107370 | 6,64E-01  | -2,226345471 | 6,39E-01 | 4,24E-01 | 7,19E-01 | Gm43588       | 1,58 | No  |
| ENSMUSG00000107373 | 1,81E+00  | -3,10765737  | 1,28E+00 | 2,58E-01 | 5,50E-01 | Gm42668       | 3,49 | No  |
| ENSMUSG00000107374 | 4,55E-01  | -1,146276696 | 9,44E-01 | 3,31E-01 | 6,32E-01 | Gm43172       | 1,37 | No  |
| ENSMUSG00000107378 | -1,89E+00 | -3,033648118 | 1,42E+00 | 2,33E-01 | 5,50E-01 | Gm18995       | 0,27 | No  |
| ENSMUSG00000107379 | -6,44E-01 | 3,452190912  | 4,35E+01 | 4,19E-11 | 4,16E-09 | Gm43126       | 0,64 | Yes |

|                    |           |              |           |          |          |               |      |     |
|--------------------|-----------|--------------|-----------|----------|----------|---------------|------|-----|
| ENSMUSG00000107383 | 7,63E-02  | 8,706832023  | 1,78E+00  | 1,82E-01 | 5,45E-01 | Gm4366        | 1,05 | No  |
| ENSMUSG00000107385 | -2,00E-02 | -2,896129725 | 2,28E-04  | 9,88E-01 | 1,00E+00 | C330024D21Rik | 0,99 | No  |
| ENSMUSG00000107388 | 1,26E+00  | -2,89614485  | 9,84E-01  | 3,21E-01 | 6,22E-01 | Gm42788       | 2,39 | No  |
| ENSMUSG00000107389 | 7,31E-01  | -2,963243158 | 2,91E-01  | 5,90E-01 | 8,41E-01 | Gm43124       | 1,66 | No  |
| ENSMUSG00000107390 | 8,90E-01  | -1,946147954 | 1,48E+00  | 2,24E-01 | 5,50E-01 | Gm43323       | 1,85 | No  |
| ENSMUSG00000107395 | -2,51E+00 | -2,355534759 | 5,46E+00  | 1,94E-02 | 1,48E-01 | Gm44331       | 0,18 | No  |
| ENSMUSG00000107401 | -3,83E-02 | -3,107651936 | -7,91E-11 | 1,00E+00 | 1,00E+00 | Gm6312        | 0,97 | No  |
| ENSMUSG00000107402 | 7,61E-02  | -0,395529238 | 5,29E-02  | 8,18E-01 | 9,70E-01 | 4732416N19Rik | 1,05 | No  |
| ENSMUSG00000107406 | -1,82E-01 | -0,011076487 | 3,94E-01  | 5,30E-01 | 8,05E-01 | 1700040L08Rik | 0,88 | No  |
| ENSMUSG00000107411 | -1,32E-01 | 0,028189952  | 1,93E-01  | 6,60E-01 | 8,82E-01 | Gm19040       | 0,91 | No  |
| ENSMUSG00000107412 | -1,87E+00 | -3,107637761 | 1,39E+00  | 2,38E-01 | 5,50E-01 | Gm20383       | 0,27 | No  |
| ENSMUSG00000107413 | -3,94E-02 | -2,89608212  | 7,39E-04  | 9,78E-01 | 1,00E+00 | Gm20553       | 0,97 | No  |
| ENSMUSG00000107417 | -3,83E-02 | -3,107651936 | -7,91E-11 | 1,00E+00 | 1,00E+00 | Olfr1383      | 0,97 | No  |
| ENSMUSG00000107418 | 6,21E-01  | -2,448698061 | 4,30E-01  | 5,12E-01 | 7,95E-01 | Gm4782        | 1,54 | No  |
| ENSMUSG00000107420 | -3,35E-02 | 0,788906359  | 2,13E-02  | 8,84E-01 | 1,00E+00 | Gm43910       | 0,98 | No  |
| ENSMUSG00000107428 | 8,86E-01  | 1,385269946  | 2,28E+01  | 1,84E-06 | 7,55E-05 | Gm44154       | 1,85 | Yes |
| ENSMUSG00000107429 | 1,26E-01  | 1,171788572  | 4,05E-01  | 5,24E-01 | 8,01E-01 | Gm44206       | 1,09 | No  |
| ENSMUSG00000107430 | -6,05E-02 | -2,35547958  | 5,05E-03  | 9,43E-01 | 1,00E+00 | Gm31532       | 0,96 | No  |
| ENSMUSG00000107431 | -1,10E+00 | -1,770416655 | 3,55E+00  | 5,96E-02 | 3,02E-01 | Gm44114       | 0,47 | No  |
| ENSMUSG00000107432 | -7,84E-01 | -0,912615    | 3,28E+00  | 7,00E-02 | 3,34E-01 | Gm36189       | 0,58 | No  |
| ENSMUSG00000107434 | 1,85E+00  | -3,107657832 | 1,35E+00  | 2,46E-01 | 5,50E-01 | Gm4640        | 3,61 | No  |
| ENSMUSG00000107436 | -1,87E+00 | -3,033619006 | 1,41E+00  | 2,36E-01 | 5,50E-01 | Gm44416       | 0,27 | No  |
| ENSMUSG00000107440 | -5,88E-02 | -3,033616507 | 1,62E-03  | 9,68E-01 | 1,00E+00 | Gm40377       | 0,96 | No  |
| ENSMUSG00000107443 | -4,22E-01 | -0,146253479 | 1,80E+00  | 1,80E-01 | 5,41E-01 | Gm7468        | 0,75 | No  |
| ENSMUSG00000107455 | 1,73E+00  | -2,448750332 | 3,46E+00  | 6,28E-02 | 3,12E-01 | Gm43868       | 3,32 | No  |
| ENSMUSG00000107458 | 1,32E-01  | 0,087482906  | 2,14E-01  | 6,43E-01 | 8,72E-01 | Gm44040       | 1,10 | No  |
| ENSMUSG00000107460 | 7,65E-01  | -2,033650347 | 1,24E+00  | 2,65E-01 | 5,61E-01 | Gm44186       | 1,70 | No  |
| ENSMUSG00000107461 | -3,59E+00 | -2,831971324 | 5,80E+00  | 1,60E-02 | 1,31E-01 | Gm44045       | 0,08 | No  |
| ENSMUSG00000107462 | -7,90E-01 | 1,054509169  | 1,42E+01  | 1,60E-04 | 3,59E-03 | Gm7384        | 0,58 | Yes |
| ENSMUSG00000107465 | -1,27E-01 | 3,55989926   | 1,70E+00  | 1,93E-01 | 5,50E-01 | Gm5990        | 0,92 | No  |
| ENSMUSG00000107468 | 1,24E+00  | -2,655142566 | 9,54E-01  | 3,29E-01 | 6,29E-01 | 5730507A11Rik | 2,36 | No  |
| ENSMUSG00000107470 | -3,11E-02 | 5,447975118  | 1,99E-01  | 6,56E-01 | 8,80E-01 | Gm3375        | 0,98 | No  |

|                    |           |              |           |          |          |               |      |     |
|--------------------|-----------|--------------|-----------|----------|----------|---------------|------|-----|
| ENSMUSG00000107471 | 1,79E+00  | -3,033666867 | 1,28E+00  | 2,58E-01 | 5,50E-01 | Gm44147       | 3,46 | No  |
| ENSMUSG00000107472 | -2,70E+00 | -2,96323619  | 2,89E+00  | 8,89E-02 | 3,79E-01 | Gm44265       | 0,15 | No  |
| ENSMUSG00000107476 | -2,86E-02 | 5,546745428  | 1,76E-01  | 6,75E-01 | 8,91E-01 | Zfp862-ps     | 0,98 | No  |
| ENSMUSG00000107477 | 1,01E-01  | -1,641305889 | 3,16E-02  | 8,59E-01 | 9,95E-01 | Gm44366       | 1,07 | No  |
| ENSMUSG00000107478 | -1,03E-01 | 5,379490157  | 2,14E+00  | 1,43E-01 | 4,79E-01 | Gm45234       | 0,93 | No  |
| ENSMUSG00000107479 | -1,94E+00 | -3,107619243 | 1,50E+00  | 2,21E-01 | 5,50E-01 | 2610300M13Rik | 0,26 | No  |
| ENSMUSG00000107480 | 5,01E-01  | 2,929421894  | 1,85E+01  | 1,74E-05 | 5,46E-04 | Gm44165       | 1,42 | Yes |
| ENSMUSG00000107481 | -6,69E-01 | -0,847591883 | 2,69E+00  | 1,01E-01 | 3,93E-01 | 4833403J16Rik | 0,63 | No  |
| ENSMUSG00000107482 | 1,45E-01  | 5,356304875  | 4,21E+00  | 4,02E-02 | 2,38E-01 | Gm45233       | 1,11 | No  |
| ENSMUSG00000107484 | 1,52E-01  | -0,267992353 | 2,08E-01  | 6,48E-01 | 8,75E-01 | Nasp-ps1      | 1,11 | No  |
| ENSMUSG00000107487 | 3,76E-01  | 0,083135178  | 1,64E+00  | 2,01E-01 | 5,50E-01 | Gm44156       | 1,30 | No  |
| ENSMUSG00000107491 | -8,75E-02 | -2,711739449 | 7,09E-03  | 9,33E-01 | 1,00E+00 | Gm17893       | 0,94 | No  |
| ENSMUSG00000107495 | 1,62E+00  | -2,770639998 | 1,79E+00  | 1,80E-01 | 5,42E-01 | Gm44215       | 3,07 | No  |
| ENSMUSG00000107497 | -2,81E-01 | -1,548136116 | 2,58E-01  | 6,12E-01 | 8,52E-01 | Gm44957       | 0,82 | No  |
| ENSMUSG00000107499 | 2,71E-01  | 2,173619264  | 3,77E+00  | 5,23E-02 | 2,78E-01 | Ccdc142       | 1,21 | No  |
| ENSMUSG00000107501 | 8,72E-02  | -1,226353507 | 3,37E-02  | 8,54E-01 | 9,92E-01 | Gm29781       | 1,06 | No  |
| ENSMUSG00000107502 | 2,41E-02  | 0,172023655  | 7,55E-03  | 9,31E-01 | 1,00E+00 | Gm44065       | 1,02 | No  |
| ENSMUSG00000107504 | 1,44E-01  | -1,574302778 | 6,74E-02  | 7,95E-01 | 9,57E-01 | Gm35549       | 1,10 | No  |
| ENSMUSG00000107505 | 4,04E-01  | -2,268071789 | 2,61E-01  | 6,09E-01 | 8,51E-01 | Gm18009       | 1,32 | No  |
| ENSMUSG00000107508 | -9,55E-01 | -1,57408987  | 2,86E+00  | 9,10E-02 | 3,82E-01 | Gm44083       | 0,52 | No  |
| ENSMUSG00000107509 | 4,48E-01  | 0,070788836  | 2,21E+00  | 1,37E-01 | 4,67E-01 | Gm44941       | 1,36 | No  |
| ENSMUSG00000107519 | 7,07E-01  | -2,963242697 | 2,70E-01  | 6,03E-01 | 8,48E-01 | Gm26996       | 1,63 | No  |
| ENSMUSG00000107524 | -4,72E-01 | -2,070165399 | 4,10E-01  | 5,22E-01 | 8,00E-01 | Gm44136       | 0,72 | No  |
| ENSMUSG00000107526 | 1,85E+00  | -3,107657832 | 1,35E+00  | 2,46E-01 | 5,50E-01 | 1700003I16Rik | 3,61 | No  |
| ENSMUSG00000107529 | -5,95E-01 | -2,268131565 | 4,83E-01  | 4,87E-01 | 7,74E-01 | Gm44291       | 0,66 | No  |
| ENSMUSG00000107531 | 6,59E-01  | -0,847878994 | 2,84E+00  | 9,18E-02 | 3,82E-01 | E330037G11Rik | 1,58 | No  |
| ENSMUSG00000107534 | -2,71E+00 | -2,896125742 | 2,90E+00  | 8,85E-02 | 3,79E-01 | Gm43920       | 0,15 | No  |
| ENSMUSG00000107535 | 1,06E+00  | -2,146140858 | 1,43E+00  | 2,32E-01 | 5,50E-01 | Gm44183       | 2,08 | No  |
| ENSMUSG00000107539 | -5,72E-02 | 1,797551667  | 1,34E-01  | 7,14E-01 | 9,12E-01 | Gm44790       | 0,96 | No  |
| ENSMUSG00000107542 | 1,34E-02  | -2,963213009 | -8,25E-12 | 1,00E+00 | 1,00E+00 | Gm43969       | 1,01 | No  |
| ENSMUSG00000107546 | -8,55E-01 | 0,066558377  | 9,53E+00  | 2,02E-03 | 2,82E-02 | Gm20560       | 0,55 | Yes |
| ENSMUSG00000107548 | -1,23E+00 | -3,146117124 | 7,12E-01  | 3,99E-01 | 6,98E-01 | Gm43866       | 0,42 | No  |

|                    |           |              |           |          |          |               |  |      |     |
|--------------------|-----------|--------------|-----------|----------|----------|---------------|--|------|-----|
| ENSMUSG00000107549 | 2,24E-01  | -0,473117731 | 4,12E-01  | 5,21E-01 | 7,99E-01 | Gm43961       |  | 1,17 | No  |
| ENSMUSG00000107552 | -2,10E-02 | -2,896131589 | 2,14E-04  | 9,88E-01 | 1,00E+00 | Gm44096       |  | 0,99 | No  |
| ENSMUSG00000107556 | -1,19E+00 | -1,655225331 | 4,82E+00  | 2,81E-02 | 1,90E-01 | Gm44237       |  | 0,44 | No  |
| ENSMUSG00000107560 | -2,18E-01 | 1,82216241   | 1,87E+00  | 1,72E-01 | 5,28E-01 | Gm44199       |  | 0,86 | No  |
| ENSMUSG00000107561 | -3,23E-01 | -0,195434084 | 9,99E-01  | 3,18E-01 | 6,18E-01 | Gm44264       |  | 0,80 | No  |
| ENSMUSG00000107564 | -3,83E-02 | -3,107651936 | -7,91E-11 | 1,00E+00 | 1,00E+00 | Gm44379       |  | 0,97 | No  |
| ENSMUSG00000107566 | -2,72E+00 | -2,770615865 | 2,92E+00  | 8,76E-02 | 3,78E-01 | Gm44332       |  | 0,15 | No  |
| ENSMUSG00000107567 | -7,30E-02 | -2,497577757 | 3,53E-03  | 9,53E-01 | 1,00E+00 | 4930480K02Rik |  | 0,95 | No  |
| ENSMUSG00000107568 | 9,63E-01  | -1,226494113 | 4,27E+00  | 3,88E-02 | 2,33E-01 | Gm18840       |  | 1,95 | No  |
| ENSMUSG00000107569 | -1,87E+00 | -3,107637761 | 1,39E+00  | 2,38E-01 | 5,50E-01 | Gm44268       |  | 0,27 | No  |
| ENSMUSG00000107570 | 1,04E+00  | -0,300695852 | 9,79E+00  | 1,75E-03 | 2,52E-02 | Gm44207       |  | 2,05 | Yes |
| ENSMUSG00000107573 | 1,87E+00  | -3,107639691 | 1,38E+00  | 2,40E-01 | 5,50E-01 | Olfr1389      |  | 3,67 | No  |
| ENSMUSG00000107576 | -1,34E+00 | -2,600571733 | 1,13E+00  | 2,87E-01 | 5,83E-01 | Gm44093       |  | 0,39 | No  |
| ENSMUSG00000107577 | -2,07E-01 | 4,761906179  | 7,46E+00  | 6,30E-03 | 6,65E-02 | Gm44103       |  | 0,87 | No  |
| ENSMUSG00000107578 | -1,88E+00 | -2,355515204 | 4,15E+00  | 4,17E-02 | 2,43E-01 | Gm32536       |  | 0,27 | No  |
| ENSMUSG00000107583 | -1,38E-01 | -1,033546897 | 1,00E-01  | 7,52E-01 | 9,32E-01 | Gm44104       |  | 0,91 | No  |
| ENSMUSG00000107585 | -2,69E-01 | -0,243560893 | 7,35E-01  | 3,91E-01 | 6,91E-01 | 3300002P13Rik |  | 0,83 | No  |
| ENSMUSG00000107586 | -1,67E+00 | -2,185602141 | 4,23E+00  | 3,96E-02 | 2,36E-01 | Gm44283       |  | 0,31 | No  |
| ENSMUSG00000107588 | -1,46E+00 | -2,832003692 | 1,11E+00  | 2,92E-01 | 5,88E-01 | Gm45021       |  | 0,36 | No  |
| ENSMUSG00000107591 | 3,89E-01  | -1,929246531 | 2,42E-01  | 6,23E-01 | 8,58E-01 | Gm6794        |  | 1,31 | No  |
| ENSMUSG00000107593 | 4,95E-01  | -0,887794787 | 1,35E+00  | 2,46E-01 | 5,50E-01 | Gm44097       |  | 1,41 | No  |
| ENSMUSG00000107595 | -1,89E+00 | -3,1076441   | 1,42E+00  | 2,33E-01 | 5,50E-01 | Gm44441       |  | 0,27 | No  |
| ENSMUSG00000107596 | -1,24E-01 | 4,759245149  | 2,60E+00  | 1,07E-01 | 4,00E-01 | Gm18913       |  | 0,92 | No  |
| ENSMUSG00000107597 | -1,20E+00 | -2,448680295 | 1,88E+00  | 1,71E-01 | 5,26E-01 | Gm44764       |  | 0,43 | No  |
| ENSMUSG00000107600 | 6,94E-01  | -2,963285211 | 2,59E-01  | 6,11E-01 | 8,52E-01 | Gm6308        |  | 1,62 | No  |
| ENSMUSG00000107601 | 4,88E-01  | -2,401368895 | 3,24E-01  | 5,69E-01 | 8,30E-01 | Gm2651        |  | 1,40 | No  |
| ENSMUSG00000107604 | -3,51E-01 | -1,107725617 | 6,02E-01  | 4,38E-01 | 7,31E-01 | Gm44041       |  | 0,78 | No  |
| ENSMUSG00000107608 | 8,53E-02  | 3,571474435  | 7,52E-01  | 3,86E-01 | 6,87E-01 | Gm43863       |  | 1,06 | No  |
| ENSMUSG00000107610 | 2,97E-01  | -0,60064787  | 5,80E-01  | 4,46E-01 | 7,37E-01 | D530018E20Rik |  | 1,23 | No  |
| ENSMUSG00000107611 | -1,89E+00 | -3,1076441   | 1,42E+00  | 2,33E-01 | 5,50E-01 | Gm44131       |  | 0,27 | No  |
| ENSMUSG00000107618 | 4,12E-01  | 0,07896169   | 1,89E+00  | 1,69E-01 | 5,24E-01 | Gm6261        |  | 1,33 | No  |
| ENSMUSG00000107619 | -1,73E+00 | -2,600693563 | 2,07E+00  | 1,50E-01 | 4,91E-01 | Gm32479       |  | 0,30 | No  |

|                    |           |              |           |          |          |               |      |     |
|--------------------|-----------|--------------|-----------|----------|----------|---------------|------|-----|
| ENSMUSG00000107622 | 2,59E-01  | 6,29660858   | 1,65E+01  | 4,83E-05 | 1,33E-03 | 4930512J16Rik | 1,20 | Yes |
| ENSMUSG00000107624 | -7,62E-01 | -1,4170508   | 1,94E+00  | 1,64E-01 | 5,15E-01 | Gm44005       | 0,59 | No  |
| ENSMUSG00000107627 | 1,88E+00  | -2,963229875 | 1,37E+00  | 2,42E-01 | 5,50E-01 | Gm19244       | 3,68 | No  |
| ENSMUSG00000107628 | 6,23E-01  | -2,146170766 | 7,87E-01  | 3,75E-01 | 6,76E-01 | Gm44282       | 1,54 | No  |
| ENSMUSG00000107629 | -1,90E+00 | -3,033647263 | 1,44E+00  | 2,30E-01 | 5,50E-01 | Gm44011       | 0,27 | No  |
| ENSMUSG00000107632 | 7,45E-01  | -2,896176528 | 3,02E-01  | 5,83E-01 | 8,38E-01 | Gm44070       | 1,68 | No  |
| ENSMUSG00000107633 | -7,87E-01 | -0,928908458 | 3,31E+00  | 6,88E-02 | 3,30E-01 | Gm44078       | 0,58 | No  |
| ENSMUSG00000107634 | 7,61E-01  | -2,711758567 | 5,00E-01  | 4,80E-01 | 7,67E-01 | Gm36816       | 1,69 | No  |
| ENSMUSG00000107639 | -4,39E-01 | 2,158426397  | 9,44E+00  | 2,12E-03 | 2,93E-02 | Gm4374        | 0,74 | Yes |
| ENSMUSG00000107640 | -4,08E-02 | -0,726281599 | 1,21E-02  | 9,12E-01 | 1,00E+00 | Gm38804       | 0,97 | No  |
| ENSMUSG00000107642 | -1,92E+00 | -3,0336536   | 1,46E+00  | 2,27E-01 | 5,50E-01 | Tas2r141-ps4  | 0,26 | No  |
| ENSMUSG00000107647 | 2,21E-01  | 0,752766228  | 9,17E-01  | 3,38E-01 | 6,39E-01 | Gm44445       | 1,17 | No  |
| ENSMUSG00000107651 | 2,15E-01  | 0,464485448  | 6,92E-01  | 4,06E-01 | 7,02E-01 | Gm44166       | 1,16 | No  |
| ENSMUSG00000107653 | 4,41E-01  | -0,043040932 | 2,14E+00  | 1,43E-01 | 4,79E-01 | Gm31520       | 1,36 | No  |
| ENSMUSG00000107655 | -1,89E+00 | -3,1076441   | 1,42E+00  | 2,33E-01 | 5,50E-01 | Gm44220       | 0,27 | No  |
| ENSMUSG00000107656 | 1,87E+00  | -3,107639691 | 1,38E+00  | 2,40E-01 | 5,50E-01 | 4930563H07Rik | 3,67 | No  |
| ENSMUSG00000107657 | -1,95E+00 | -3,033628749 | 1,50E+00  | 2,21E-01 | 5,50E-01 | Gm44446       | 0,26 | No  |
| ENSMUSG00000107658 | -1,25E-01 | -1,389761566 | 5,73E-02  | 8,11E-01 | 9,66E-01 | Gm44958       | 0,92 | No  |
| ENSMUSG00000107659 | 7,26E-02  | 5,273730008  | 1,04E+00  | 3,07E-01 | 6,06E-01 | Gm44170       | 1,05 | No  |
| ENSMUSG00000107666 | -1,86E+00 | -3,033612668 | 1,39E+00  | 2,38E-01 | 5,50E-01 | 4933406J09Rik | 0,28 | No  |
| ENSMUSG00000107667 | -1,91E+00 | -3,070174436 | 1,45E+00  | 2,29E-01 | 5,50E-01 | C530044C16Rik | 0,27 | No  |
| ENSMUSG00000107668 | -4,25E-01 | 0,993306024  | 4,11E+00  | 4,26E-02 | 2,45E-01 | Gm44424       | 0,74 | No  |
| ENSMUSG00000107676 | 3,00E-01  | -2,60065754  | 9,13E-02  | 7,63E-01 | 9,38E-01 | Gm44178       | 1,23 | No  |
| ENSMUSG00000107684 | -3,96E-01 | 0,12033572   | 1,90E+00  | 1,68E-01 | 5,23E-01 | Rab5a-ps      | 0,76 | No  |
| ENSMUSG00000107686 | 5,33E-01  | -0,683192658 | 1,79E+00  | 1,81E-01 | 5,43E-01 | Gm9038        | 1,45 | No  |
| ENSMUSG00000107688 | 1,96E-01  | -1,355565722 | 1,47E-01  | 7,01E-01 | 9,05E-01 | Gm44091       | 1,15 | No  |
| ENSMUSG00000107689 | 2,47E-01  | -1,998116252 | 1,42E-01  | 7,06E-01 | 9,08E-01 | Gm44386       | 1,19 | No  |
| ENSMUSG00000107690 | -4,11E+00 | -2,655113979 | 8,56E+00  | 3,43E-03 | 4,23E-02 | Gm44044       | 0,06 | Yes |
| ENSMUSG00000107692 | -1,98E-02 | -3,033655952 | 2,83E-11  | 1,00E+00 | 1,00E+00 | Gm19172       | 0,99 | No  |
| ENSMUSG00000107693 | 9,01E-03  | -3,107646452 | -5,16E-10 | 1,00E+00 | 1,00E+00 | Gm44312       | 1,01 | No  |
| ENSMUSG00000107695 | 2,74E-02  | -3,033621357 | 9,16E-12  | 1,00E+00 | 1,00E+00 | Gm44289       | 1,02 | No  |
| ENSMUSG00000107698 | -1,76E+00 | -2,77054928  | 2,16E+00  | 1,41E-01 | 4,75E-01 | Gm44430       | 0,29 | No  |

|                    |           |              |           |          |          |               |       |     |
|--------------------|-----------|--------------|-----------|----------|----------|---------------|-------|-----|
| ENSMUSG00000107701 | 7,63E-02  | -2,472856286 | 6,99E-03  | 9,33E-01 | 1,00E+00 | Gm19287       | 1,05  | No  |
| ENSMUSG00000107702 | -2,59E-01 | -1,485140193 | 2,42E-01  | 6,23E-01 | 8,58E-01 | Gm44140       | 0,84  | No  |
| ENSMUSG00000107703 | -1,87E+00 | -3,107637761 | 1,39E+00  | 2,38E-01 | 5,50E-01 | Gm44039       | 0,27  | No  |
| ENSMUSG00000107704 | 1,24E+00  | -2,832055352 | 9,55E-01  | 3,28E-01 | 6,29E-01 | Gm36355       | 2,36  | No  |
| ENSMUSG00000107705 | -1,65E-02 | 3,700544939  | 3,13E-02  | 8,60E-01 | 9,95E-01 | Gm45062       | 0,99  | No  |
| ENSMUSG00000107709 | -9,37E-01 | -2,7116555   | 7,69E-01  | 3,80E-01 | 6,81E-01 | 9430018G01Rik | 0,52  | No  |
| ENSMUSG00000107713 | -4,44E-01 | 1,778734304  | 7,27E+00  | 7,00E-03 | 7,18E-02 | Gm6681        | 0,74  | No  |
| ENSMUSG00000107715 | 3,27E-01  | -1,146097031 | 5,42E-01  | 4,62E-01 | 7,50E-01 | Gm44135       | 1,25  | No  |
| ENSMUSG00000107719 | -6,81E-02 | -0,683200374 | 3,14E-02  | 8,59E-01 | 9,95E-01 | Gm43937       | 0,95  | No  |
| ENSMUSG00000107722 | -5,83E-01 | -2,770606131 | 2,67E-01  | 6,05E-01 | 8,49E-01 | 2900060B14Rik | 0,67  | No  |
| ENSMUSG00000107723 | -4,10E+00 | -2,711633531 | 8,54E+00  | 3,47E-03 | 4,27E-02 | Gm43964       | 0,06  | Yes |
| ENSMUSG00000107724 | -8,56E-02 | 1,425569237  | 2,37E-01  | 6,27E-01 | 8,60E-01 | Gm16042       | 0,94  | No  |
| ENSMUSG00000107726 | -1,21E+00 | -2,448628635 | 1,88E+00  | 1,70E-01 | 5,26E-01 | Gm44037       | 0,43  | No  |
| ENSMUSG00000107728 | -5,70E-01 | -0,070207766 | 3,74E+00  | 5,33E-02 | 2,82E-01 | Gm38910       | 0,67  | No  |
| ENSMUSG00000107730 | -1,14E-01 | -0,623216907 | 9,35E-02  | 7,60E-01 | 9,37E-01 | Gm44238       | 0,92  | No  |
| ENSMUSG00000107732 | 3,51E-01  | 3,183868391  | 1,04E+01  | 1,23E-03 | 1,92E-02 | Gm44204       | 1,28  | Yes |
| ENSMUSG00000107733 | 6,19E-01  | -1,10777463  | 2,04E+00  | 1,54E-01 | 4,97E-01 | Gm8774        | 1,54  | No  |
| ENSMUSG00000107734 | 3,50E+00  | -2,83204585  | 5,31E+00  | 2,13E-02 | 1,57E-01 | Gm30055       | 11,29 | No  |
| ENSMUSG00000107736 | -5,71E-01 | 0,066596302  | 4,05E+00  | 4,43E-02 | 2,51E-01 | Gm44148       | 0,67  | No  |
| ENSMUSG00000107740 | 4,05E+00  | -2,711776361 | 8,02E+00  | 4,63E-03 | 5,27E-02 | Gm18765       | 16,59 | No  |
| ENSMUSG00000107741 | -1,61E-01 | 0,98675348   | 6,05E-01  | 4,37E-01 | 7,29E-01 | Gm2011        | 0,89  | No  |
| ENSMUSG00000107742 | 1,29E-01  | 0,726368241  | 3,29E-01  | 5,66E-01 | 8,28E-01 | 9530085L11Rik | 1,09  | No  |
| ENSMUSG00000107743 | -1,03E+00 | -1,929327108 | 1,98E+00  | 1,59E-01 | 5,07E-01 | Gm44087       | 0,49  | No  |
| ENSMUSG00000107745 | 5,97E-03  | -3,1461183   | -3,40E-10 | 1,00E+00 | 1,00E+00 | Gm43917       | 1,00  | No  |
| ENSMUSG00000107747 | -1,66E-01 | 5,528776396  | 5,88E+00  | 1,53E-02 | 1,28E-01 | Gm5881        | 0,89  | No  |
| ENSMUSG00000107749 | -2,68E-01 | 1,952770778  | 3,45E+00  | 6,34E-02 | 3,14E-01 | Gm44321       | 0,83  | No  |
| ENSMUSG00000107750 | -5,88E-02 | -0,395571314 | 3,15E-02  | 8,59E-01 | 9,95E-01 | Gm44013       | 0,96  | No  |
| ENSMUSG00000107751 | -1,26E-01 | 1,830733145  | 6,29E-01  | 4,28E-01 | 7,22E-01 | Gm6749        | 0,92  | No  |
| ENSMUSG00000107753 | 6,72E-01  | -1,033747692 | 2,37E+00  | 1,24E-01 | 4,40E-01 | Gm44371       | 1,59  | No  |
| ENSMUSG00000107756 | -3,83E-01 | 2,369664672  | 7,87E+00  | 5,01E-03 | 5,61E-02 | Gm44164       | 0,77  | No  |
| ENSMUSG00000107758 | 1,59E-02  | 1,799078443  | 9,94E-03  | 9,21E-01 | 1,00E+00 | Gm19253       | 1,01  | No  |
| ENSMUSG00000107759 | 4,92E-01  | -2,226185361 | 3,28E-01  | 5,67E-01 | 8,29E-01 | Gm44258       | 1,41  | No  |

|                    |           |              |           |          |          |               |      |     |
|--------------------|-----------|--------------|-----------|----------|----------|---------------|------|-----|
| ENSMUSG00000107760 | 2,84E-01  | 1,821711992  | 3,37E+00  | 6,65E-02 | 3,24E-01 | Gm44401       | 1,22 | No  |
| ENSMUSG00000107761 | 6,73E-01  | 1,280346726  | 1,27E+01  | 3,58E-04 | 6,98E-03 | 2010008C14Rik | 1,59 | Yes |
| ENSMUSG00000107763 | 1,02E+00  | -1,998094709 | 2,02E+00  | 1,55E-01 | 4,99E-01 | Gm43962       | 2,02 | No  |
| ENSMUSG00000107764 | 1,81E+00  | -3,10765737  | 1,28E+00  | 2,58E-01 | 5,50E-01 | Gm5318        | 3,49 | No  |
| ENSMUSG00000107766 | -1,98E-02 | -3,033655952 | 2,83E-11  | 1,00E+00 | 1,00E+00 | Gm44073       | 0,99 | No  |
| ENSMUSG00000107767 | -1,10E+00 | -2,711737644 | 9,04E-01  | 3,42E-01 | 6,42E-01 | Gm44448       | 0,47 | No  |
| ENSMUSG00000107768 | 2,29E+00  | -2,655192549 | 2,98E+00  | 8,45E-02 | 3,73E-01 | Gm44275       | 4,88 | No  |
| ENSMUSG00000107770 | -2,24E-02 | 3,496236943  | 5,04E-02  | 8,22E-01 | 9,72E-01 | Gm44126       | 0,98 | No  |
| ENSMUSG00000107771 | -1,06E-01 | -0,322278838 | 1,05E-01  | 7,45E-01 | 9,29E-01 | Gm8956        | 0,93 | No  |
| ENSMUSG00000107773 | 1,81E+00  | -3,10765737  | 1,28E+00  | 2,58E-01 | 5,50E-01 | Gm43971       | 3,49 | No  |
| ENSMUSG00000107788 | -4,21E-01 | -0,294622385 | 1,60E+00  | 2,06E-01 | 5,50E-01 | Gm6266        | 0,75 | No  |
| ENSMUSG00000107789 | -1,76E-01 | -0,652880782 | 2,21E-01  | 6,38E-01 | 8,69E-01 | Gm44965       | 0,89 | No  |
| ENSMUSG00000107792 | 6,13E-01  | 1,213783426  | 9,46E+00  | 2,09E-03 | 2,90E-02 | Gm43914       | 1,53 | Yes |
| ENSMUSG00000107798 | -1,49E+00 | -2,997998658 | 1,04E+00  | 3,07E-01 | 6,05E-01 | Gm44064       | 0,36 | No  |
| ENSMUSG00000107801 | 2,64E+00  | -2,711702743 | 2,69E+00  | 1,01E-01 | 3,93E-01 | Gm44086       | 6,22 | No  |
| ENSMUSG00000107802 | -1,76E-01 | 2,231939152  | 1,66E+00  | 1,98E-01 | 5,50E-01 | 1700126G02Rik | 0,89 | No  |
| ENSMUSG00000107804 | 1,87E+00  | -3,107639691 | 1,38E+00  | 2,40E-01 | 5,50E-01 | Gm44439       | 3,67 | No  |
| ENSMUSG00000107806 | -2,67E-01 | 0,425928133  | 1,09E+00  | 2,97E-01 | 5,92E-01 | Gm19726       | 0,83 | No  |
| ENSMUSG00000107810 | 4,31E-01  | -2,77058342  | 1,45E-01  | 7,03E-01 | 9,06E-01 | Gm18609       | 1,35 | No  |
| ENSMUSG00000107811 | 1,38E+00  | -2,311335065 | 2,70E+00  | 1,00E-01 | 3,92E-01 | Gm44000       | 2,60 | No  |
| ENSMUSG00000107812 | -2,52E-01 | -0,980375787 | 3,47E-01  | 5,56E-01 | 8,21E-01 | Gm43935       | 0,84 | No  |
| ENSMUSG00000107813 | -2,72E-02 | -0,460689145 | 4,92E-03  | 9,44E-01 | 1,00E+00 | Gm44434       | 0,98 | No  |
| ENSMUSG00000107814 | -2,75E-01 | -1,472836862 | 2,65E-01  | 6,07E-01 | 8,50E-01 | Gm35876       | 0,83 | No  |
| ENSMUSG00000107821 | 7,46E-01  | -2,711688128 | 3,03E-01  | 5,82E-01 | 8,38E-01 | Gm8038        | 1,68 | No  |
| ENSMUSG00000107824 | 7,20E-01  | -2,963285673 | 2,81E-01  | 5,96E-01 | 8,44E-01 | Gm6443        | 1,65 | No  |
| ENSMUSG00000107828 | -3,83E-02 | -3,107651936 | -7,91E-11 | 1,00E+00 | 1,00E+00 | Gm18289       | 0,97 | No  |
| ENSMUSG00000107832 | 1,24E-01  | 0,451716549  | 2,38E-01  | 6,26E-01 | 8,60E-01 | Gm18688       | 1,09 | No  |
| ENSMUSG00000107833 | 1,87E+00  | -3,107639691 | 1,38E+00  | 2,40E-01 | 5,50E-01 | Gm18791       | 3,67 | No  |
| ENSMUSG00000107835 | 1,13E+00  | -1,929289607 | 2,61E+00  | 1,06E-01 | 3,99E-01 | Gm43999       | 2,19 | No  |
| ENSMUSG00000107836 | 1,15E-01  | 0,545576324  | 2,34E-01  | 6,28E-01 | 8,61E-01 | Gm5315        | 1,08 | No  |
| ENSMUSG00000107838 | -6,46E-02 | 0,575047743  | 7,28E-02  | 7,87E-01 | 9,53E-01 | Gm45769       | 0,96 | No  |
| ENSMUSG00000107841 | -2,06E-02 | 0,868453882  | 7,96E-03  | 9,29E-01 | 1,00E+00 | Gm44185       | 0,99 | No  |



|                    |           |              |           |          |          |               |       |    |
|--------------------|-----------|--------------|-----------|----------|----------|---------------|-------|----|
| ENSMUSG00000107842 | -3,90E-01 | -2,800963755 | 9,39E-02  | 7,59E-01 | 9,36E-01 | Gm44089       | 0,76  | No |
| ENSMUSG00000107846 | 1,33E-02  | 2,635188375  | 1,11E-02  | 9,16E-01 | 1,00E+00 | Gm43963       | 1,01  | No |
| ENSMUSG00000107849 | 3,54E+00  | -2,711666864 | 5,44E+00  | 1,96E-02 | 1,49E-01 | Gm43904       | 11,64 | No |
| ENSMUSG00000107852 | 3,93E-02  | 2,034707393  | 6,97E-02  | 7,92E-01 | 9,55E-01 | Gm6227        | 1,03  | No |
| ENSMUSG00000107853 | -1,13E-01 | 3,903569457  | 1,58E+00  | 2,09E-01 | 5,50E-01 | Gm18584       | 0,92  | No |
| ENSMUSG00000107863 | 4,24E-02  | -3,033592245 | -1,17E-09 | 1,00E+00 | 1,00E+00 | Gm44389       | 1,03  | No |
| ENSMUSG00000107868 | -3,09E-02 | -0,3896111   | 8,32E-03  | 9,27E-01 | 1,00E+00 | Gm5112        | 0,98  | No |
| ENSMUSG00000107869 | 2,65E+00  | -2,896149781 | 2,71E+00  | 9,97E-02 | 3,92E-01 | Gm29848       | 6,28  | No |
| ENSMUSG00000107872 | 2,20E-01  | 2,345444575  | 2,49E+00  | 1,15E-01 | 4,19E-01 | Gm44511       | 1,16  | No |
| ENSMUSG00000107876 | -2,66E+00 | -3,033639428 | 2,81E+00  | 9,35E-02 | 3,83E-01 | Gm43936       | 0,16  | No |
| ENSMUSG00000107877 | -3,27E-01 | -0,946073837 | 5,73E-01  | 4,49E-01 | 7,39E-01 | Gm43951       | 0,80  | No |
| ENSMUSG00000107878 | 1,86E+00  | -3,033661846 | 1,35E+00  | 2,46E-01 | 5,50E-01 | Gm44106       | 3,62  | No |
| ENSMUSG00000107879 | -5,43E-01 | -2,600648664 | 2,32E-01  | 6,30E-01 | 8,63E-01 | 9330102E08Rik | 0,69  | No |
| ENSMUSG00000107881 | 1,23E-01  | 4,75705901   | 2,56E+00  | 1,10E-01 | 4,06E-01 | Gm44250       | 1,09  | No |
| ENSMUSG00000107883 | 1,22E+00  | -1,801052214 | 3,65E+00  | 5,62E-02 | 2,91E-01 | Gm44062       | 2,33  | No |
| ENSMUSG00000107884 | -5,05E-01 | -2,929324921 | 1,29E-01  | 7,20E-01 | 9,15E-01 | Gm44144       | 0,70  | No |
| ENSMUSG00000107892 | 5,16E-02  | -1,155855069 | 1,23E-02  | 9,12E-01 | 1,00E+00 | Gm44524       | 1,04  | No |
| ENSMUSG00000107894 | 2,54E-01  | -1,033684746 | 3,51E-01  | 5,54E-01 | 8,19E-01 | Gm10388       | 1,19  | No |
| ENSMUSG00000107896 | 1,50E-02  | 1,702251984  | 8,16E-03  | 9,28E-01 | 1,00E+00 | Gm8719        | 1,01  | No |
| ENSMUSG00000107899 | 3,15E+00  | -2,963263135 | 4,04E+00  | 4,45E-02 | 2,51E-01 | Gm44069       | 8,85  | No |
| ENSMUSG00000107906 | 7,86E-02  | 5,030885103  | 1,12E+00  | 2,91E-01 | 5,86E-01 | Gm5580        | 1,06  | No |
| ENSMUSG00000107907 | -8,49E-01 | -1,770476494 | 1,96E+00  | 1,62E-01 | 5,11E-01 | Gm8574        | 0,56  | No |
| ENSMUSG00000107909 | -1,19E+00 | -2,205805091 | 2,08E+00  | 1,49E-01 | 4,90E-01 | 2610017A05Rik | 0,44  | No |
| ENSMUSG00000107911 | -3,69E-02 | 0,661416498  | 2,37E-02  | 8,78E-01 | 1,00E+00 | Gm7565        | 0,97  | No |
| ENSMUSG00000107915 | -1,30E+00 | -2,31120289  | 2,26E+00  | 1,33E-01 | 4,59E-01 | Gm44014       | 0,41  | No |
| ENSMUSG00000107920 | -8,09E-02 | -1,997927704 | 1,53E-02  | 9,02E-01 | 1,00E+00 | Gm7783        | 0,95  | No |
| ENSMUSG00000107921 | -1,23E-02 | 2,064138364  | 7,04E-03  | 9,33E-01 | 1,00E+00 | Gm6423        | 0,99  | No |
| ENSMUSG00000107922 | -1,94E+00 | -3,107619243 | 1,50E+00  | 2,21E-01 | 5,50E-01 | Gm44285       | 0,26  | No |
| ENSMUSG00000107928 | 5,67E-02  | 6,742754522  | 8,46E-01  | 3,58E-01 | 6,59E-01 | Gm45140       | 1,04  | No |
| ENSMUSG00000107932 | -1,52E-02 | -0,510098642 | 1,53E-03  | 9,69E-01 | 1,00E+00 | Gm44432       | 0,99  | No |
| ENSMUSG00000107936 | 5,48E-01  | 0,870479076  | 5,99E+00  | 1,44E-02 | 1,22E-01 | Gm44155       | 1,46  | No |
| ENSMUSG00000107937 | -6,78E-02 | 1,070874615  | 1,15E-01  | 7,35E-01 | 9,24E-01 | Gm44200       | 0,95  | No |

|                    |           |              |           |          |          |               |      |     |
|--------------------|-----------|--------------|-----------|----------|----------|---------------|------|-----|
| ENSMUSG00000107942 | -5,88E-02 | -3,033616507 | 1,62E-03  | 9,68E-01 | 1,00E+00 | Gm44411       | 0,96 | No  |
| ENSMUSG00000107943 | 3,14E-02  | -3,107617333 | -7,69E-10 | 1,00E+00 | 1,00E+00 | Gm18538       | 1,02 | No  |
| ENSMUSG00000107944 | 2,06E-01  | 0,355040752  | 6,27E-01  | 4,29E-01 | 7,22E-01 | Gm44280       | 1,15 | No  |
| ENSMUSG00000107946 | 2,64E-01  | -1,165788149 | 2,92E-01  | 5,89E-01 | 8,41E-01 | Gm44066       | 1,20 | No  |
| ENSMUSG00000107949 | -6,18E-01 | -2,355517256 | 5,21E-01  | 4,70E-01 | 7,59E-01 | Gm44157       | 0,65 | No  |
| ENSMUSG00000107950 | -1,16E-01 | 1,74798771   | 5,11E-01  | 4,75E-01 | 7,63E-01 | Gm6375        | 0,92 | No  |
| ENSMUSG00000107951 | -1,25E-01 | 6,992487389  | 4,25E+00  | 3,93E-02 | 2,35E-01 | Gm6210        | 0,92 | No  |
| ENSMUSG00000107952 | -1,73E-01 | 4,721751481  | 5,11E+00  | 2,37E-02 | 1,69E-01 | Gm6352        | 0,89 | No  |
| ENSMUSG00000107954 | -3,00E-01 | 0,477486345  | 1,43E+00  | 2,32E-01 | 5,50E-01 | Gm43942       | 0,81 | No  |
| ENSMUSG00000107955 | -6,50E-02 | -2,497608475 | 5,82E-03  | 9,39E-01 | 1,00E+00 | Gm44027       | 0,96 | No  |
| ENSMUSG00000107956 | 1,81E+00  | -3,10765737  | 1,28E+00  | 2,58E-01 | 5,50E-01 | Speer9-ps1    | 3,49 | No  |
| ENSMUSG00000107961 | 3,40E-03  | 5,20648834   | 2,24E-03  | 9,62E-01 | 1,00E+00 | Gm44036       | 1,00 | No  |
| ENSMUSG00000107962 | -2,72E-01 | 2,607689902  | 4,86E+00  | 2,75E-02 | 1,87E-01 | Gm43980       | 0,83 | No  |
| ENSMUSG00000107966 | 5,85E-01  | 0,053752454  | 4,13E+00  | 4,20E-02 | 2,44E-01 | Gm44001       | 1,50 | No  |
| ENSMUSG00000107968 | 7,57E-03  | 4,298393526  | 8,08E-03  | 9,28E-01 | 1,00E+00 | Gm44419       | 1,01 | No  |
| ENSMUSG00000107969 | 1,59E-01  | 0,036651906  | 2,97E-01  | 5,86E-01 | 8,39E-01 | Gm44085       | 1,12 | No  |
| ENSMUSG00000107970 | -1,94E+00 | -3,107619243 | 1,50E+00  | 2,21E-01 | 5,50E-01 | AC132412.1    | 0,26 | No  |
| ENSMUSG00000107971 | 1,88E-01  | 0,337519728  | 5,81E-01  | 4,46E-01 | 7,37E-01 | Gm44260       | 1,14 | No  |
| ENSMUSG00000107972 | -1,06E-01 | -3,033634182 | 5,86E-03  | 9,39E-01 | 1,00E+00 | Gm18198       | 0,93 | No  |
| ENSMUSG00000107976 | 1,87E+00  | -3,03364371  | 1,36E+00  | 2,43E-01 | 5,50E-01 | Gm44043       | 3,66 | No  |
| ENSMUSG00000107977 | -1,94E+00 | -3,107619243 | 1,50E+00  | 2,21E-01 | 5,50E-01 | Gm44121       | 0,26 | No  |
| ENSMUSG00000107978 | -2,49E-02 | -3,146121042 | -4,44E-11 | 1,00E+00 | 1,00E+00 | Gm44109       | 0,98 | No  |
| ENSMUSG00000107984 | -1,89E+00 | -3,1076441   | 1,42E+00  | 2,33E-01 | 5,50E-01 | Gm5306        | 0,27 | No  |
| ENSMUSG00000107985 | -6,97E-01 | 3,827387029  | 5,88E+01  | 1,70E-14 | 2,48E-12 | Gm35037       | 0,62 | Yes |
| ENSMUSG00000107989 | -3,88E-03 | -3,03362684  | 4,02E-12  | 1,00E+00 | 1,00E+00 | Gm19692       | 1,00 | No  |
| ENSMUSG00000107990 | 1,65E-02  | 0,44547007   | 4,51E-03  | 9,46E-01 | 1,00E+00 | Gm7890        | 1,01 | No  |
| ENSMUSG00000107991 | 2,62E+00  | -2,963288024 | 2,65E+00  | 1,03E-01 | 3,95E-01 | Gm43919       | 6,14 | No  |
| ENSMUSG00000107992 | -2,63E-02 | -3,033653157 | 2,33E-04  | 9,88E-01 | 1,00E+00 | Gm44223       | 0,98 | No  |
| ENSMUSG00000107993 | -1,89E+00 | -3,1076441   | 1,42E+00  | 2,33E-01 | 5,50E-01 | G930045G22Rik | 0,27 | No  |
| ENSMUSG00000107994 | 1,59E-01  | 2,638820636  | 1,63E+00  | 2,01E-01 | 5,50E-01 | D830050J10Rik | 1,12 | No  |
| ENSMUSG00000107997 | 1,18E-01  | 1,111966796  | 3,75E-01  | 5,40E-01 | 8,10E-01 | Gm44243       | 1,09 | No  |
| ENSMUSG00000107999 | 1,18E-01  | 3,587139739  | 1,43E+00  | 2,31E-01 | 5,50E-01 | Gm44123       | 1,09 | No  |

|                    |           |              |           |          |          |               |      |     |
|--------------------|-----------|--------------|-----------|----------|----------|---------------|------|-----|
| ENSMUSG00000108000 | -8,78E-02 | -2,963255397 | 3,51E-03  | 9,53E-01 | 1,00E+00 | Gm44208       | 0,94 | No  |
| ENSMUSG00000108004 | -2,41E-02 | 0,530276749  | 8,25E-03  | 9,28E-01 | 1,00E+00 | Gm44080       | 0,98 | No  |
| ENSMUSG00000108006 | -1,87E+00 | -3,107637761 | 1,39E+00  | 2,38E-01 | 5,50E-01 | Gm44418       | 0,27 | No  |
| ENSMUSG00000108010 | -3,21E+00 | -2,831974895 | 4,33E+00  | 3,74E-02 | 2,30E-01 | Gm38708       | 0,11 | No  |
| ENSMUSG00000108011 | -3,09E-02 | 0,028153361  | 1,15E-02  | 9,15E-01 | 1,00E+00 | Gm44596       | 0,98 | No  |
| ENSMUSG00000108012 | -1,94E+00 | -3,107619243 | 1,50E+00  | 2,21E-01 | 5,50E-01 | Gm44012       | 0,26 | No  |
| ENSMUSG00000108014 | 3,11E+00  | -2,832056868 | 3,94E+00  | 4,71E-02 | 2,60E-01 | Gm44380       | 8,62 | No  |
| ENSMUSG00000108015 | -1,92E-01 | 1,210669153  | 9,23E-01  | 3,37E-01 | 6,37E-01 | Gm32591       | 0,88 | No  |
| ENSMUSG00000108019 | 3,14E-02  | -3,107617333 | -7,69E-10 | 1,00E+00 | 1,00E+00 | Gm44108       | 1,02 | No  |
| ENSMUSG00000108024 | -5,75E-02 | 1,107963518  | 8,84E-02  | 7,66E-01 | 9,40E-01 | Gm43912       | 0,96 | No  |
| ENSMUSG00000108030 | 2,09E-01  | -1,460779763 | 1,63E-01  | 6,87E-01 | 8,97E-01 | 9530062K07Rik | 1,16 | No  |
| ENSMUSG00000108033 | -6,23E-02 | 2,093912218  | 1,76E-01  | 6,75E-01 | 8,91E-01 | Gm44284       | 0,96 | No  |
| ENSMUSG00000108034 | -2,79E-01 | 0,498246102  | 1,30E+00  | 2,55E-01 | 5,50E-01 | 4930557K07Rik | 0,82 | No  |
| ENSMUSG00000108036 | -1,22E-02 | -2,896088833 | 1,05E-04  | 9,92E-01 | 1,00E+00 | Gm43967       | 0,99 | No  |
| ENSMUSG00000108037 | 9,77E-03  | 4,342594661  | 1,42E-02  | 9,05E-01 | 1,00E+00 | Gm44597       | 1,01 | No  |
| ENSMUSG00000108042 | -9,55E-01 | -0,755683852 | 6,02E+00  | 1,42E-02 | 1,21E-01 | B130021K23Rik | 0,52 | No  |
| ENSMUSG00000108045 | -3,87E-02 | 4,41498098   | 2,24E-01  | 6,36E-01 | 8,67E-01 | Gm5576        | 0,97 | No  |
| ENSMUSG00000108046 | 8,32E-01  | -1,47307237  | 2,62E+00  | 1,06E-01 | 3,98E-01 | Gm43924       | 1,78 | No  |
| ENSMUSG00000108048 | -1,68E+00 | -2,401360285 | 3,13E+00  | 7,70E-02 | 3,54E-01 | Gm43990       | 0,31 | No  |
| ENSMUSG00000108049 | -6,14E-01 | -0,614070379 | 3,05E+00  | 8,06E-02 | 3,64E-01 | Gm44168       | 0,65 | No  |
| ENSMUSG00000108052 | 1,04E+00  | -1,401505269 | 3,65E+00  | 5,61E-02 | 2,91E-01 | Gm8479        | 2,06 | No  |
| ENSMUSG00000108053 | -9,86E-02 | 0,288367633  | 1,45E-01  | 7,03E-01 | 9,06E-01 | Gm43890       | 0,93 | No  |
| ENSMUSG00000108059 | -1,73E+00 | -2,711639502 | 2,07E+00  | 1,50E-01 | 4,91E-01 | Gm44369       | 0,30 | No  |
| ENSMUSG00000108060 | 7,74E-01  | -0,136607358 | 5,71E+00  | 1,68E-02 | 1,35E-01 | 4921529L05Rik | 1,71 | No  |
| ENSMUSG00000108064 | -1,50E-01 | 3,459855712  | 2,24E+00  | 1,35E-01 | 4,62E-01 | Gm44423       | 0,90 | No  |
| ENSMUSG00000108071 | -6,31E-02 | -2,963274299 | 1,81E-03  | 9,66E-01 | 1,00E+00 | Gm3455        | 0,96 | No  |
| ENSMUSG00000108076 | 1,87E+00  | -3,107639691 | 1,38E+00  | 2,40E-01 | 5,50E-01 | 9530086O07Rik | 3,67 | No  |
| ENSMUSG00000108078 | 1,58E-01  | -0,654986233 | 1,94E-01  | 6,60E-01 | 8,82E-01 | Gm8744        | 1,12 | No  |
| ENSMUSG00000108079 | -9,48E-01 | -2,683156605 | 7,88E-01  | 3,75E-01 | 6,76E-01 | Gm44210       | 0,52 | No  |
| ENSMUSG00000108080 | 2,76E-01  | -0,479160751 | 6,28E-01  | 4,28E-01 | 7,22E-01 | Gm10209       | 1,21 | No  |
| ENSMUSG00000108084 | -1,50E+00 | -0,033423677 | 2,60E+01  | 3,43E-07 | 1,69E-05 | Gm7932        | 0,35 | Yes |
| ENSMUSG00000108086 | 6,63E-02  | 0,49588566   | 7,03E-02  | 7,91E-01 | 9,55E-01 | Gm6786        | 1,05 | No  |

|                    |           |              |           |          |          |               |      |     |
|--------------------|-----------|--------------|-----------|----------|----------|---------------|------|-----|
| ENSMUSG00000108089 | 1,26E+00  | -2,655104122 | 9,88E-01  | 3,20E-01 | 6,21E-01 | Gm3148        | 2,40 | No  |
| ENSMUSG00000108090 | -2,27E+00 | -2,600646414 | 4,18E+00  | 4,08E-02 | 2,39E-01 | Gm6637        | 0,21 | No  |
| ENSMUSG00000108094 | 1,62E+00  | -2,655161382 | 1,79E+00  | 1,81E-01 | 5,43E-01 | Gm31108       | 3,06 | No  |
| ENSMUSG00000108095 | -2,87E-01 | -2,165696999 | 1,34E-01  | 7,15E-01 | 9,12E-01 | Gm44067       | 0,82 | No  |
| ENSMUSG00000108101 | -3,13E-01 | -0,360886712 | 7,66E-01  | 3,82E-01 | 6,83E-01 | Gm45738       | 0,81 | No  |
| ENSMUSG00000108103 | 5,36E-01  | -0,946234876 | 1,48E+00  | 2,24E-01 | 5,50E-01 | Gm44081       | 1,45 | No  |
| ENSMUSG00000108105 | -3,88E-03 | -3,03362684  | 4,02E-12  | 1,00E+00 | 1,00E+00 | Gm5340        | 1,00 | No  |
| ENSMUSG00000108107 | -1,28E+00 | -2,205817823 | 2,20E+00  | 1,38E-01 | 4,69E-01 | Gm5312        | 0,41 | No  |
| ENSMUSG00000108108 | -7,71E-02 | -0,155816837 | 6,58E-02  | 7,97E-01 | 9,58E-01 | Gm44270       | 0,95 | No  |
| ENSMUSG00000108109 | -3,03E-01 | 0,316939017  | 1,34E+00  | 2,46E-01 | 5,50E-01 | Gm44287       | 0,81 | No  |
| ENSMUSG00000108112 | -3,54E-01 | 2,838377749  | 9,46E+00  | 2,10E-03 | 2,91E-02 | Gm45193       | 0,78 | Yes |
| ENSMUSG00000108115 | -7,07E-01 | -2,146151844 | 8,51E-01  | 3,56E-01 | 6,57E-01 | Gm7039        | 0,61 | No  |
| ENSMUSG00000108118 | 9,01E-03  | -3,107646452 | -5,16E-10 | 1,00E+00 | 1,00E+00 | Gm34312       | 1,01 | No  |
| ENSMUSG00000108120 | -2,32E-01 | 1,511668022  | 1,75E+00  | 1,86E-01 | 5,50E-01 | 9930120I10Rik | 0,85 | No  |
| ENSMUSG00000108121 | 1,89E+00  | -3,033614598 | 1,38E+00  | 2,40E-01 | 5,50E-01 | Gm43952       | 3,70 | No  |
| ENSMUSG00000108122 | -7,35E-01 | -0,997857182 | 2,53E+00  | 1,12E-01 | 4,11E-01 | Gm44116       | 0,60 | No  |
| ENSMUSG00000108125 | 1,41E+00  | -1,574361039 | 6,75E+00  | 9,38E-03 | 8,90E-02 | Gm17812       | 2,66 | No  |
| ENSMUSG00000108126 | -8,96E-02 | 3,007780954  | 6,40E-01  | 4,24E-01 | 7,18E-01 | Gm43909       | 0,94 | No  |
| ENSMUSG00000108129 | -3,30E-01 | -2,268085874 | 1,63E-01  | 6,86E-01 | 8,97E-01 | 4930417O13Rik | 0,80 | No  |
| ENSMUSG00000108132 | 5,97E-01  | -2,655177752 | 3,97E-01  | 5,29E-01 | 8,04E-01 | Gm44175       | 1,51 | No  |
| ENSMUSG00000108137 | -6,72E-02 | 1,313265785  | 1,24E-01  | 7,25E-01 | 9,18E-01 | Gm44053       | 0,95 | No  |
| ENSMUSG00000108141 | 8,77E-01  | -2,185651815 | 1,44E+00  | 2,30E-01 | 5,50E-01 | Gm44079       | 1,84 | No  |
| ENSMUSG00000108142 | 1,41E+00  | -1,997941647 | 2,85E+00  | 9,11E-02 | 3,82E-01 | Gm7498        | 2,66 | No  |
| ENSMUSG00000108152 | 1,86E+00  | -2,963235356 | 1,35E+00  | 2,46E-01 | 5,50E-01 | Gm44152       | 3,62 | No  |
| ENSMUSG00000108154 | 3,51E-01  | 0,5955138    | 2,07E+00  | 1,50E-01 | 4,91E-01 | Gm44033       | 1,28 | No  |
| ENSMUSG00000108155 | -8,14E-01 | -2,070224965 | 9,66E-01  | 3,26E-01 | 6,26E-01 | Gm44443       | 0,57 | No  |
| ENSMUSG00000108158 | -4,39E-01 | -2,205752379 | 2,77E-01  | 5,99E-01 | 8,46E-01 | Gm44002       | 0,74 | No  |
| ENSMUSG00000108161 | 3,66E-01  | -0,574303544 | 1,16E+00  | 2,82E-01 | 5,79E-01 | Gm32914       | 1,29 | No  |
| ENSMUSG00000108162 | -1,94E+00 | -3,107619243 | 1,50E+00  | 2,21E-01 | 5,50E-01 | Gm20589       | 0,26 | No  |
| ENSMUSG00000108166 | -1,52E+00 | -2,185546866 | 3,35E+00  | 6,71E-02 | 3,26E-01 | Gm44017       | 0,35 | No  |
| ENSMUSG00000108170 | -2,60E-01 | -0,697281524 | 4,28E-01  | 5,13E-01 | 7,95E-01 | Gm43966       | 0,84 | No  |
| ENSMUSG00000108171 | -1,73E-01 | -0,412969496 | 2,53E-01  | 6,15E-01 | 8,54E-01 | Gm43915       | 0,89 | No  |

|                    |           |              |          |          |          |               |      |    |
|--------------------|-----------|--------------|----------|----------|----------|---------------|------|----|
| ENSMUSG00000108173 | 1,81E+00  | -3,10765737  | 1,28E+00 | 2,58E-01 | 5,50E-01 | Gm44231       | 3,49 | No |
| ENSMUSG00000108176 | 7,78E-02  | -1,655133082 | 1,48E-02 | 9,03E-01 | 1,00E+00 | Gm43965       | 1,06 | No |
| ENSMUSG00000108178 | 1,43E+00  | -2,070260706 | 3,75E+00 | 5,27E-02 | 2,80E-01 | Gm44267       | 2,69 | No |
| ENSMUSG00000108180 | 7,54E-01  | -2,963279799 | 3,12E-01 | 5,77E-01 | 8,35E-01 | Gm44141       | 1,69 | No |
| ENSMUSG00000108181 | -2,17E-01 | 0,581516183  | 8,59E-01 | 3,54E-01 | 6,55E-01 | C030015A19Rik | 0,86 | No |
| ENSMUSG00000108183 | -1,34E+00 | -2,896147326 | 1,12E+00 | 2,89E-01 | 5,85E-01 | Gm44227       | 0,39 | No |
| ENSMUSG00000108184 | 3,19E-01  | -0,102753044 | 1,02E+00 | 3,11E-01 | 6,11E-01 | Gm44198       | 1,25 | No |
| ENSMUSG00000108185 | 7,99E-01  | -2,448711776 | 5,57E-01 | 4,56E-01 | 7,45E-01 | Gm19653       | 1,74 | No |
| ENSMUSG00000108187 | 1,87E+00  | -3,107639691 | 1,38E+00 | 2,40E-01 | 5,50E-01 | 4930511E03Rik | 3,67 | No |
| ENSMUSG00000108190 | 1,17E+00  | -3,14612376  | 6,40E-01 | 4,24E-01 | 7,18E-01 | Gm44731       | 2,26 | No |
| ENSMUSG00000108195 | -1,93E+00 | -2,963244023 | 1,47E+00 | 2,25E-01 | 5,50E-01 | Gm44415       | 0,26 | No |
| ENSMUSG00000108196 | -5,25E-01 | -1,472914692 | 1,05E+00 | 3,05E-01 | 6,02E-01 | Gm36328       | 0,69 | No |
| ENSMUSG00000108197 | 1,02E+00  | -2,10766469  | 2,02E+00 | 1,55E-01 | 4,99E-01 | Gm44214       | 2,03 | No |
| ENSMUSG00000108199 | 1,30E-01  | -0,980520214 | 7,56E-02 | 7,83E-01 | 9,50E-01 | Gm44249       | 1,09 | No |
| ENSMUSG00000108200 | -5,25E-02 | -3,033661434 | 4,08E-11 | 1,00E+00 | 1,00E+00 | Gm43931       | 0,96 | No |
| ENSMUSG00000108204 | -1,43E-01 | 0,939264836  | 4,51E-01 | 5,02E-01 | 7,87E-01 | Gm44180       | 0,91 | No |
| ENSMUSG00000108206 | -1,47E+00 | -2,185579614 | 3,84E+00 | 5,01E-02 | 2,71E-01 | Gm44427       | 0,36 | No |
| ENSMUSG00000108207 | 4,07E-01  | -2,01572771  | 2,64E-01 | 6,07E-01 | 8,50E-01 | 1810059H22Rik | 1,33 | No |
| ENSMUSG00000108210 | -1,35E+00 | -1,185468221 | 7,21E+00 | 7,24E-03 | 7,36E-02 | Gm35808       | 0,39 | No |
| ENSMUSG00000108211 | -1,06E+00 | -1,185647692 | 5,08E+00 | 2,43E-02 | 1,71E-01 | Gm44130       | 0,48 | No |
| ENSMUSG00000108212 | -2,03E+00 | -2,448564308 | 3,12E+00 | 7,74E-02 | 3,55E-01 | Gm44132       | 0,25 | No |
| ENSMUSG00000108214 | -8,43E-01 | -0,175413884 | 6,22E+00 | 1,26E-02 | 1,11E-01 | Gm43982       | 0,56 | No |
| ENSMUSG00000108216 | -4,61E-02 | -2,770616592 | 1,44E-03 | 9,70E-01 | 1,00E+00 | Gm44153       | 0,97 | No |
| ENSMUSG00000108218 | 3,13E-01  | -0,641256138 | 6,22E-01 | 4,30E-01 | 7,24E-01 | Olfr1372-ps1  | 1,24 | No |
| ENSMUSG00000108219 | -3,02E-01 | -0,236555633 | 8,57E-01 | 3,55E-01 | 6,56E-01 | Gm44101       | 0,81 | No |
| ENSMUSG00000108226 | -1,87E+00 | -3,107637761 | 1,39E+00 | 2,38E-01 | 5,50E-01 | Gm44063       | 0,27 | No |
| ENSMUSG00000108227 | 1,62E+00  | -2,77064679  | 1,81E+00 | 1,78E-01 | 5,39E-01 | 4933412L11Rik | 3,08 | No |
| ENSMUSG00000108230 | 4,31E-01  | -2,770619573 | 1,44E-01 | 7,04E-01 | 9,06E-01 | Gm3549        | 1,35 | No |
| ENSMUSG00000108231 | -1,51E-01 | 3,192138869  | 2,00E+00 | 1,58E-01 | 5,04E-01 | Gm4045        | 0,90 | No |
| ENSMUSG00000108232 | -3,98E-01 | -1,929311483 | 3,48E-01 | 5,55E-01 | 8,20E-01 | Gm43916       | 0,76 | No |
| ENSMUSG00000108233 | -6,05E-01 | -2,268135009 | 7,10E-01 | 3,99E-01 | 6,98E-01 | Gm44084       | 0,66 | No |
| ENSMUSG00000108234 | 3,17E-01  | -1,600791325 | 3,47E-01 | 5,56E-01 | 8,21E-01 | Gm44428       | 1,25 | No |

|                    |           |              |           |          |          |               |      |     |
|--------------------|-----------|--------------|-----------|----------|----------|---------------|------|-----|
| ENSMUSG00000108235 | -1,75E-02 | -2,963227524 | 1,42E-04  | 9,90E-01 | 1,00E+00 | Gm44248       | 0,99 | No  |
| ENSMUSG00000108236 | 7,36E-01  | -2,89615794  | 2,95E-01  | 5,87E-01 | 8,40E-01 | 0610033M10Rik | 1,67 | No  |
| ENSMUSG00000108237 | -6,84E-02 | -1,863743308 | 1,20E-02  | 9,13E-01 | 1,00E+00 | Gm19757       | 0,95 | No  |
| ENSMUSG00000108238 | -1,41E+00 | -0,024143574 | 1,67E+01  | 4,39E-05 | 1,21E-03 | Gm43984       | 0,38 | Yes |
| ENSMUSG00000108239 | 2,82E-01  | -0,863803793 | 4,62E-01  | 4,97E-01 | 7,82E-01 | Gm19434       | 1,22 | No  |
| ENSMUSG00000108244 | -5,88E-02 | -2,96324652  | 1,57E-03  | 9,68E-01 | 1,00E+00 | Gm44077       | 0,96 | No  |
| ENSMUSG00000108255 | -1,27E+00 | -3,146104694 | 7,49E-01  | 3,87E-01 | 6,87E-01 | Gm16499       | 0,42 | No  |
| ENSMUSG00000108257 | -7,38E-02 | -3,033659033 | 2,66E-03  | 9,59E-01 | 1,00E+00 | Gm44251       | 0,95 | No  |
| ENSMUSG00000108258 | -5,96E-02 | -1,863740227 | 1,08E-02  | 9,17E-01 | 1,00E+00 | Gm43913       | 0,96 | No  |
| ENSMUSG00000108259 | 1,24E+00  | -1,832093545 | 3,24E+00  | 7,19E-02 | 3,40E-01 | Gm6727        | 2,36 | No  |
| ENSMUSG00000108260 | 5,97E-01  | -2,401391457 | 3,97E-01  | 5,28E-01 | 8,04E-01 | Gm3793        | 1,51 | No  |
| ENSMUSG00000108263 | 3,85E-01  | -1,378319721 | 5,65E-01  | 4,52E-01 | 7,42E-01 | 1700051K13Rik | 1,31 | No  |
| ENSMUSG00000108268 | 3,14E-01  | 0,878094471  | 1,75E+00  | 1,85E-01 | 5,49E-01 | Gm44187       | 1,24 | No  |
| ENSMUSG00000108269 | 7,45E-01  | -2,71163508  | 3,02E-01  | 5,83E-01 | 8,38E-01 | Gm18422       | 1,68 | No  |
| ENSMUSG00000108276 | -1,23E+00 | -3,033649293 | 7,12E-01  | 3,99E-01 | 6,98E-01 | Gm36640       | 0,43 | No  |
| ENSMUSG00000108278 | -1,94E+00 | -3,107619243 | 1,50E+00  | 2,21E-01 | 5,50E-01 | Gm44194       | 0,26 | No  |
| ENSMUSG00000108282 | 1,78E-01  | 2,110969769  | 1,50E+00  | 2,21E-01 | 5,50E-01 | Gm44317       | 1,13 | No  |
| ENSMUSG00000108283 | -3,58E-01 | -1,627600379 | 4,63E-01  | 4,96E-01 | 7,81E-01 | Gm44008       | 0,78 | No  |
| ENSMUSG00000108285 | 9,01E-03  | -3,107646452 | -5,16E-10 | 1,00E+00 | 1,00E+00 | Gm34358       | 1,01 | No  |
| ENSMUSG00000108288 | -5,51E-02 | -2,832005472 | 2,04E-03  | 9,64E-01 | 1,00E+00 | Gm44202       | 0,96 | No  |
| ENSMUSG00000108290 | 2,14E+00  | -2,355642876 | 3,65E+00  | 5,62E-02 | 2,91E-01 | Gm44120       | 4,39 | No  |
| ENSMUSG00000108291 | -1,96E-01 | 0,691635665  | 7,40E-01  | 3,90E-01 | 6,90E-01 | Gm44292       | 0,87 | No  |
| ENSMUSG00000108294 | -5,40E-03 | 1,471033338  | 9,05E-04  | 9,76E-01 | 1,00E+00 | Gm44429       | 1,00 | No  |
| ENSMUSG00000108297 | -1,94E+00 | -3,107619243 | 1,50E+00  | 2,21E-01 | 5,50E-01 | Gm44167       | 0,26 | No  |
| ENSMUSG00000108298 | -3,81E-02 | -0,185544858 | 1,52E-02  | 9,02E-01 | 1,00E+00 | Gm44226       | 0,97 | No  |
| ENSMUSG00000108305 | -4,34E+00 | -2,548110541 | 1,01E+01  | 1,50E-03 | 2,23E-02 | Gm19078       | 0,05 | Yes |
| ENSMUSG00000108308 | -5,61E-01 | -2,711646884 | 2,47E-01  | 6,19E-01 | 8,56E-01 | Gm45218       | 0,68 | No  |
| ENSMUSG00000108310 | -9,45E-01 | -2,770598032 | 7,83E-01  | 3,76E-01 | 6,77E-01 | Gm44712       | 0,52 | No  |
| ENSMUSG00000108311 | 3,14E-02  | -3,107617333 | -7,69E-10 | 1,00E+00 | 1,00E+00 | Gm44737       | 1,02 | No  |
| ENSMUSG00000108312 | 3,62E-01  | 2,028975193  | 5,94E+00  | 1,48E-02 | 1,25E-01 | Gm44521       | 1,29 | No  |
| ENSMUSG00000108314 | -1,76E-02 | 1,355299162  | 9,30E-03  | 9,23E-01 | 1,00E+00 | Prkcz2        | 0,99 | No  |
| ENSMUSG00000108317 | 1,82E-01  | -2,268096935 | 4,96E-02  | 8,24E-01 | 9,73E-01 | Gm44663       | 1,13 | No  |

|                    |           |              |           |          |          |               |      |     |
|--------------------|-----------|--------------|-----------|----------|----------|---------------|------|-----|
| ENSMUSG00000108319 | -3,84E+00 | -2,497585435 | 7,06E+00  | 7,87E-03 | 7,81E-02 | Gm44552       | 0,07 | No  |
| ENSMUSG00000108320 | -1,05E-01 | -0,770708825 | 7,53E-02  | 7,84E-01 | 9,51E-01 | Gm44877       | 0,93 | No  |
| ENSMUSG00000108321 | -7,11E-02 | 4,737761875  | 8,44E-01  | 3,58E-01 | 6,60E-01 | Gm44649       | 0,95 | No  |
| ENSMUSG00000108322 | 1,86E+00  | -3,033661846 | 1,35E+00  | 2,46E-01 | 5,50E-01 | 5430431A17Rik | 3,62 | No  |
| ENSMUSG00000108323 | -4,54E-01 | -1,289554455 | 7,65E-01  | 3,82E-01 | 6,83E-01 | Gm44945       | 0,73 | No  |
| ENSMUSG00000108328 | -3,62E-02 | -2,770637036 | 1,08E-03  | 9,74E-01 | 1,00E+00 | Gm45196       | 0,98 | No  |
| ENSMUSG00000108331 | -2,35E-01 | 1,73507396   | 1,94E+00  | 1,64E-01 | 5,15E-01 | Gm5322        | 0,85 | No  |
| ENSMUSG00000108332 | -9,92E-02 | 1,409317221  | 3,04E-01  | 5,81E-01 | 8,38E-01 | D530033B14Rik | 0,93 | No  |
| ENSMUSG00000108333 | -2,48E-01 | -0,733499665 | 3,81E-01  | 5,37E-01 | 8,09E-01 | Gm45095       | 0,84 | No  |
| ENSMUSG00000108334 | 1,81E+00  | -3,10765737  | 1,28E+00  | 2,58E-01 | 5,50E-01 | Gm30771       | 3,49 | No  |
| ENSMUSG00000108341 | 1,88E-01  | -1,333343983 | 1,36E-01  | 7,12E-01 | 9,11E-01 | Gm44746       | 1,14 | No  |
| ENSMUSG00000108344 | 1,87E+00  | -3,107639691 | 1,38E+00  | 2,40E-01 | 5,50E-01 | Gm8952        | 3,67 | No  |
| ENSMUSG00000108347 | -3,57E-01 | 0,563448157  | 2,05E+00  | 1,52E-01 | 4,94E-01 | Gm19187       | 0,78 | No  |
| ENSMUSG00000108348 | -2,70E+00 | -2,96323619  | 2,89E+00  | 8,89E-02 | 3,79E-01 | Gm42372       | 0,15 | No  |
| ENSMUSG00000108350 | -5,27E-01 | 2,071857046  | 1,26E+01  | 3,91E-04 | 7,49E-03 | Gm44950       | 0,69 | Yes |
| ENSMUSG00000108352 | 1,78E-01  | 4,068608391  | 4,11E+00  | 4,27E-02 | 2,46E-01 | Usf2-ps1      | 1,13 | No  |
| ENSMUSG00000108353 | -5,03E-02 | 5,466516724  | 5,22E-01  | 4,70E-01 | 7,58E-01 | Gm45205       | 0,97 | No  |
| ENSMUSG00000108354 | -1,82E-01 | -2,205825095 | 5,55E-02  | 8,14E-01 | 9,68E-01 | 4931431B13Rik | 0,88 | No  |
| ENSMUSG00000108356 | 1,87E+00  | -3,03364371  | 1,36E+00  | 2,43E-01 | 5,50E-01 | 9130221F21Rik | 3,66 | No  |
| ENSMUSG00000108358 | 4,03E-01  | 0,451373104  | 2,82E+00  | 9,34E-02 | 3,83E-01 | Gm44509       | 1,32 | No  |
| ENSMUSG00000108359 | -2,65E+00 | -2,896109668 | 2,80E+00  | 9,45E-02 | 3,85E-01 | C430039J01Rik | 0,16 | No  |
| ENSMUSG00000108360 | 9,09E-01  | -0,491613261 | 5,63E+00  | 1,77E-02 | 1,39E-01 | Gm36159       | 1,88 | No  |
| ENSMUSG00000108362 | -2,68E+00 | -2,896091163 | 2,85E+00  | 9,14E-02 | 3,82E-01 | Gm18561       | 0,16 | No  |
| ENSMUSG00000108365 | -7,36E-02 | -0,180461631 | 4,53E-02  | 8,31E-01 | 9,78E-01 | Gm44951       | 0,95 | No  |
| ENSMUSG00000108366 | -8,45E-02 | 6,184344158  | 1,72E+00  | 1,90E-01 | 5,50E-01 | Gm5586        | 0,94 | No  |
| ENSMUSG00000108367 | 1,87E+00  | -2,896096663 | 1,36E+00  | 2,44E-01 | 5,50E-01 | Gm4881        | 3,65 | No  |
| ENSMUSG00000108368 | 1,88E-01  | 1,181536028  | 9,07E-01  | 3,41E-01 | 6,42E-01 | Gm45053       | 1,14 | No  |
| ENSMUSG00000108370 | 3,14E-02  | -3,107617333 | -7,69E-10 | 1,00E+00 | 1,00E+00 | Gm8209        | 1,02 | No  |
| ENSMUSG00000108371 | 1,10E+00  | -1,74096751  | 2,87E+00  | 9,02E-02 | 3,81E-01 | Gm38832       | 2,15 | No  |
| ENSMUSG00000108372 | 2,63E+00  | -2,963275836 | 2,67E+00  | 1,02E-01 | 3,94E-01 | Gm45124       | 6,19 | No  |
| ENSMUSG00000108378 | -1,47E-01 | -1,185731378 | 1,01E-01  | 7,51E-01 | 9,32E-01 | Gm44641       | 0,90 | No  |
| ENSMUSG00000108381 | 8,05E-02  | 2,908817976  | 4,87E-01  | 4,85E-01 | 7,73E-01 | Gm9299        | 1,06 | No  |

|                    |           |              |          |          |          |               |      |     |
|--------------------|-----------|--------------|----------|----------|----------|---------------|------|-----|
| ENSMUSG00000108382 | 7,66E-01  | -2,770578531 | 3,18E-01 | 5,73E-01 | 8,32E-01 | 4930448A20Rik | 1,70 | No  |
| ENSMUSG00000108388 | 2,61E-01  | -2,033601536 | 1,41E-01 | 7,07E-01 | 9,08E-01 | Gm44673       | 1,20 | No  |
| ENSMUSG00000108389 | -6,81E-01 | -1,289481128 | 1,86E+00 | 1,72E-01 | 5,29E-01 | Gm45206       | 0,62 | No  |
| ENSMUSG00000108391 | 3,37E-01  | 0,868289592  | 2,55E+00 | 1,10E-01 | 4,06E-01 | Gm9768        | 1,26 | No  |
| ENSMUSG00000108392 | 1,64E+00  | -2,497527858 | 1,85E+00 | 1,74E-01 | 5,32E-01 | Gm9463        | 3,12 | No  |
| ENSMUSG00000108393 | -1,41E-01 | -0,165643653 | 1,98E-01 | 6,56E-01 | 8,80E-01 | Gm32633       | 0,91 | No  |
| ENSMUSG00000108394 | -6,69E-01 | -1,366892318 | 1,41E+00 | 2,35E-01 | 5,50E-01 | Gm45477       | 0,63 | No  |
| ENSMUSG00000108396 | -7,38E-02 | -3,033659033 | 2,66E-03 | 9,59E-01 | 1,00E+00 | Gm6905        | 0,95 | No  |
| ENSMUSG00000108400 | 7,36E-01  | -2,185705814 | 9,66E-01 | 3,26E-01 | 6,26E-01 | Klk1b14-ps    | 1,67 | No  |
| ENSMUSG00000108401 | -2,37E+00 | -3,070142495 | 2,19E+00 | 1,39E-01 | 4,70E-01 | Rpl19-ps10    | 0,19 | No  |
| ENSMUSG00000108402 | -4,83E-02 | 3,261030494  | 2,15E-01 | 6,43E-01 | 8,72E-01 | 9430064I24Rik | 0,97 | No  |
| ENSMUSG00000108405 | -1,01E+00 | -2,185601949 | 1,23E+00 | 2,67E-01 | 5,63E-01 | Ywhaq-ps1     | 0,50 | No  |
| ENSMUSG00000108406 | 1,85E+00  | -3,107657832 | 1,35E+00 | 2,46E-01 | 5,50E-01 | Klk1b15-ps    | 3,61 | No  |
| ENSMUSG00000108414 | 4,16E-02  | 4,298694598  | 2,45E-01 | 6,21E-01 | 8,57E-01 | Snhg1         | 1,03 | No  |
| ENSMUSG00000108415 | -1,14E-02 | -3,033635021 | 1,50E-05 | 9,97E-01 | 1,00E+00 | Gm30146       | 0,99 | No  |
| ENSMUSG00000108416 | -1,10E-02 | -3,107638726 | 7,49E-06 | 9,98E-01 | 1,00E+00 | Gm44924       | 0,99 | No  |
| ENSMUSG00000108418 | -8,45E-01 | -2,963265612 | 3,92E-01 | 5,31E-01 | 8,05E-01 | Gm44627       | 0,56 | No  |
| ENSMUSG00000108420 | 5,11E-02  | -0,210851879 | 2,43E-02 | 8,76E-01 | 1,00E+00 | Gm45141       | 1,04 | No  |
| ENSMUSG00000108422 | -2,66E+00 | -3,033639428 | 2,81E+00 | 9,35E-02 | 3,83E-01 | Gm44765       | 0,16 | No  |
| ENSMUSG00000108425 | 1,27E-01  | -0,785951903 | 1,08E-01 | 7,42E-01 | 9,27E-01 | Gm44706       | 1,09 | No  |
| ENSMUSG00000108428 | -6,72E-01 | -3,033641569 | 1,81E-01 | 6,71E-01 | 8,88E-01 | Gm45058       | 0,63 | No  |
| ENSMUSG00000108431 | 1,81E+00  | -3,10765737  | 1,28E+00 | 2,58E-01 | 5,50E-01 | Gm42375       | 3,49 | No  |
| ENSMUSG00000108432 | 3,04E-01  | 2,5578505    | 5,51E+00 | 1,89E-02 | 1,46E-01 | Gm44756       | 1,23 | No  |
| ENSMUSG00000108435 | -1,08E-01 | 0,168141692  | 1,55E-01 | 6,94E-01 | 9,02E-01 | Gm45051       | 0,93 | No  |
| ENSMUSG00000108436 | 5,96E-01  | 2,329026299  | 1,84E+01 | 1,77E-05 | 5,55E-04 | Gm44851       | 1,51 | Yes |
| ENSMUSG00000108437 | -4,95E-01 | 4,152258161  | 3,31E+01 | 8,93E-09 | 6,25E-07 | Gm19366       | 0,71 | Yes |
| ENSMUSG00000108438 | -1,12E-01 | 3,317526325  | 1,14E+00 | 2,85E-01 | 5,82E-01 | Gm9278        | 0,93 | No  |
| ENSMUSG00000108440 | 8,27E-01  | -2,54815791  | 5,96E-01 | 4,40E-01 | 7,32E-01 | Klk1b19-ps    | 1,77 | No  |
| ENSMUSG00000108442 | -4,90E-01 | 0,975656719  | 5,21E+00 | 2,25E-02 | 1,63E-01 | Rpl15-ps5     | 0,71 | No  |
| ENSMUSG00000108443 | -9,30E-02 | 6,285763145  | 2,13E+00 | 1,44E-01 | 4,80E-01 | Gm44510       | 0,94 | No  |
| ENSMUSG00000108444 | 4,25E-01  | 2,715474229  | 1,25E+01 | 3,97E-04 | 7,57E-03 | Klk2-ps       | 1,34 | Yes |
| ENSMUSG00000108446 | -1,91E+00 | -2,896105328 | 1,45E+00 | 2,28E-01 | 5,50E-01 | Gm44997       | 0,27 | No  |



|                    |           |              |          |          |          |               |  |      |     |
|--------------------|-----------|--------------|----------|----------|----------|---------------|--|------|-----|
| ENSMUSG00000108447 | 7,22E-03  | -1,311363822 | 2,13E-04 | 9,88E-01 | 1,00E+00 | Gm44567       |  | 1,01 | No  |
| ENSMUSG00000108452 | -3,69E-02 | 0,740288657  | 2,65E-02 | 8,71E-01 | 1,00E+00 | 4930413G21Rik |  | 0,97 | No  |
| ENSMUSG00000108455 | 1,34E-01  | -2,033636797 | 3,11E-02 | 8,60E-01 | 9,95E-01 | Gm44745       |  | 1,10 | No  |
| ENSMUSG00000108456 | 2,82E-01  | -0,146182614 | 8,28E-01 | 3,63E-01 | 6,64E-01 | 4732496C06Rik |  | 1,22 | No  |
| ENSMUSG00000108459 | -1,89E+00 | -3,1076441   | 1,42E+00 | 2,33E-01 | 5,50E-01 | Gm44605       |  | 0,27 | No  |
| ENSMUSG00000108460 | -2,03E+00 | -2,311075109 | 3,11E+00 | 7,76E-02 | 3,56E-01 | Gm39041       |  | 0,25 | No  |
| ENSMUSG00000108461 | -4,05E-01 | -1,185509049 | 7,24E-01 | 3,95E-01 | 6,96E-01 | AV356131      |  | 0,76 | No  |
| ENSMUSG00000108465 | -6,75E-01 | -0,554642155 | 3,45E+00 | 6,31E-02 | 3,13E-01 | Gm45110       |  | 0,63 | No  |
| ENSMUSG00000108466 | 3,33E-01  | 1,284478227  | 2,90E+00 | 8,86E-02 | 3,79E-01 | Gm44771       |  | 1,26 | No  |
| ENSMUSG00000108470 | 7,75E-01  | -2,185744485 | 1,27E+00 | 2,59E-01 | 5,52E-01 | Gm4598        |  | 1,71 | No  |
| ENSMUSG00000108472 | 2,10E-01  | -0,921010936 | 2,44E-01 | 6,22E-01 | 8,57E-01 | Gm45212       |  | 1,16 | No  |
| ENSMUSG00000108473 | -7,11E-02 | -2,832020055 | 2,17E-03 | 9,63E-01 | 1,00E+00 | Gm44739       |  | 0,95 | No  |
| ENSMUSG00000108476 | 2,54E-01  | -0,34437678  | 4,85E-01 | 4,86E-01 | 7,73E-01 | Gm44974       |  | 1,19 | No  |
| ENSMUSG00000108477 | 1,52E-01  | 3,3043914    | 2,10E+00 | 1,47E-01 | 4,85E-01 | Gm44878       |  | 1,11 | No  |
| ENSMUSG00000108479 | 2,66E+00  | -2,96324125  | 2,74E+00 | 9,79E-02 | 3,91E-01 | 2200002A13Rik |  | 6,34 | No  |
| ENSMUSG00000108483 | -2,02E+00 | -2,54822875  | 3,10E+00 | 7,82E-02 | 3,57E-01 | Gm45184       |  | 0,25 | No  |
| ENSMUSG00000108484 | 2,73E-01  | 4,261494758  | 1,03E+01 | 1,30E-03 | 2,01E-02 | Gm18537       |  | 1,21 | Yes |
| ENSMUSG00000108486 | -7,86E-01 | 0,214638407  | 7,79E+00 | 5,24E-03 | 5,79E-02 | Gm44836       |  | 0,58 | No  |
| ENSMUSG00000108491 | -1,94E+00 | -3,107619243 | 1,50E+00 | 2,21E-01 | 5,50E-01 | Gm44523       |  | 0,26 | No  |
| ENSMUSG00000108494 | 6,06E-01  | -2,401385058 | 4,10E-01 | 5,22E-01 | 8,00E-01 | Gm45203       |  | 1,52 | No  |
| ENSMUSG00000108498 | 2,65E+00  | -3,033655087 | 2,73E+00 | 9,86E-02 | 3,91E-01 | Gm45026       |  | 6,30 | No  |
| ENSMUSG00000108500 | -3,03E-01 | -1,2680592   | 3,00E-01 | 5,84E-01 | 8,38E-01 | Gm45033       |  | 0,81 | No  |
| ENSMUSG00000108502 | -1,50E-01 | 2,848347219  | 1,67E+00 | 1,96E-01 | 5,50E-01 | Gm9240        |  | 0,90 | No  |
| ENSMUSG00000108503 | -1,48E-01 | 4,212690519  | 3,10E+00 | 7,82E-02 | 3,57E-01 | Gm20949       |  | 0,90 | No  |
| ENSMUSG00000108505 | -2,00E-02 | -2,896140696 | 2,28E-04 | 9,88E-01 | 1,00E+00 | 1700095K22Rik |  | 0,99 | No  |
| ENSMUSG00000108506 | -2,63E-01 | 2,317719067  | 3,75E+00 | 5,28E-02 | 2,80E-01 | Gm44705       |  | 0,83 | No  |
| ENSMUSG00000108509 | 4,00E-01  | -2,92932063  | 8,04E-02 | 7,77E-01 | 9,46E-01 | Gm44780       |  | 1,32 | No  |
| ENSMUSG00000108511 | -1,27E-01 | 2,454991641  | 9,73E-01 | 3,24E-01 | 6,24E-01 | Gm44987       |  | 0,92 | No  |
| ENSMUSG00000108518 | 3,34E-01  | 0,80914931   | 2,30E+00 | 1,30E-01 | 4,52E-01 | Gm5587        |  | 1,26 | No  |
| ENSMUSG00000108520 | -1,25E+00 | -2,448652242 | 1,51E+00 | 2,20E-01 | 5,50E-01 | Gm44684       |  | 0,42 | No  |
| ENSMUSG00000108521 | -8,43E-01 | -2,226274755 | 1,04E+00 | 3,09E-01 | 6,07E-01 | Gm44639       |  | 0,56 | No  |
| ENSMUSG00000108522 | -1,70E+00 | -2,226223831 | 3,20E+00 | 7,36E-02 | 3,45E-01 | Gm44664       |  | 0,31 | No  |

|                    |           |              |           |          |          |               |      |     |
|--------------------|-----------|--------------|-----------|----------|----------|---------------|------|-----|
| ENSMUSG00000108523 | -3,84E-01 | -0,662031897 | 1,08E+00  | 2,98E-01 | 5,94E-01 | 4933430L12Rik | 0,77 | No  |
| ENSMUSG00000108524 | -4,66E-02 | 2,74635129   | 1,50E-01  | 6,98E-01 | 9,04E-01 | Gm44876       | 0,97 | No  |
| ENSMUSG00000108525 | 2,67E+00  | -2,896113526 | 2,74E+00  | 9,77E-02 | 3,90E-01 | Gm7443        | 6,36 | No  |
| ENSMUSG00000108526 | -7,45E-01 | -0,294772224 | 4,88E+00  | 2,72E-02 | 1,86E-01 | Gm45828       | 0,60 | No  |
| ENSMUSG00000108527 | 3,14E-02  | -3,107617333 | -7,69E-10 | 1,00E+00 | 1,00E+00 | Gm45173       | 1,02 | No  |
| ENSMUSG00000108528 | -4,88E-02 | 3,508771387  | 2,36E-01  | 6,27E-01 | 8,60E-01 | Gm8319        | 0,97 | No  |
| ENSMUSG00000108529 | 1,92E+00  | -2,711763111 | 2,76E+00  | 9,69E-02 | 3,88E-01 | Gm29759       | 3,79 | No  |
| ENSMUSG00000108531 | 9,84E-01  | -2,740882846 | 7,22E-01  | 3,95E-01 | 6,96E-01 | Gm39091       | 1,98 | No  |
| ENSMUSG00000108533 | -2,73E-01 | -2,185613534 | 1,48E-01  | 7,01E-01 | 9,05E-01 | Gm44792       | 0,83 | No  |
| ENSMUSG00000108536 | 8,48E-01  | -1,126879696 | 3,19E+00  | 7,41E-02 | 3,46E-01 | Gm45059       | 1,80 | No  |
| ENSMUSG00000108538 | -1,89E+00 | -3,1076441   | 1,42E+00  | 2,33E-01 | 5,50E-01 | Gm45197       | 0,27 | No  |
| ENSMUSG00000108539 | 6,75E-01  | -1,015915608 | 2,31E+00  | 1,28E-01 | 4,49E-01 | Klk1b12-ps    | 1,60 | No  |
| ENSMUSG00000108540 | -1,85E-01 | 0,14415763   | 4,17E-01  | 5,18E-01 | 7,98E-01 | Gm4768        | 0,88 | No  |
| ENSMUSG00000108542 | -2,67E+00 | -2,896145101 | 2,83E+00  | 9,25E-02 | 3,83E-01 | Gm44834       | 0,16 | No  |
| ENSMUSG00000108543 | -3,92E-01 | -1,424916654 | 5,18E-01  | 4,72E-01 | 7,60E-01 | Gm44735       | 0,76 | No  |
| ENSMUSG00000108546 | 2,40E-01  | 2,24152593   | 2,90E+00  | 8,85E-02 | 3,79E-01 | Gm44662       | 1,18 | No  |
| ENSMUSG00000108547 | -7,60E-01 | -1,770559413 | 1,51E+00  | 2,19E-01 | 5,50E-01 | Gm45186       | 0,59 | No  |
| ENSMUSG00000108550 | 1,87E+00  | -3,107639691 | 1,38E+00  | 2,40E-01 | 5,50E-01 | Gm44736       | 3,67 | No  |
| ENSMUSG00000108551 | 5,08E-02  | 0,358720402  | 3,51E-02  | 8,51E-01 | 9,90E-01 | Gm20274       | 1,04 | No  |
| ENSMUSG00000108554 | -9,15E-01 | -2,655160736 | 7,32E-01  | 3,92E-01 | 6,93E-01 | Gm44824       | 0,53 | No  |
| ENSMUSG00000108555 | 9,94E-02  | 0,824168718  | 1,90E-01  | 6,63E-01 | 8,83E-01 | Gm18310       | 1,07 | No  |
| ENSMUSG00000108557 | 1,84E+00  | -3,033649193 | 1,33E+00  | 2,49E-01 | 5,50E-01 | Gm44835       | 3,58 | No  |
| ENSMUSG00000108560 | -2,69E+00 | -2,963229855 | 2,87E+00  | 9,01E-02 | 3,80E-01 | Gm44695       | 0,16 | No  |
| ENSMUSG00000108563 | 2,00E-01  | 2,42722954   | 2,39E+00  | 1,22E-01 | 4,37E-01 | Gm44686       | 1,15 | No  |
| ENSMUSG00000108566 | -1,94E+00 | -3,107619243 | 1,50E+00  | 2,21E-01 | 5,50E-01 | Gm45031       | 0,26 | No  |
| ENSMUSG00000108571 | 2,57E-01  | -0,896087905 | 4,14E-01  | 5,20E-01 | 7,99E-01 | Gm6855        | 1,20 | No  |
| ENSMUSG00000108573 | -8,92E-01 | 0,331448831  | 1,15E+01  | 7,06E-04 | 1,22E-02 | Gm44986       | 0,54 | Yes |
| ENSMUSG00000108574 | -7,15E-01 | 0,120467187  | 5,83E+00  | 1,58E-02 | 1,30E-01 | Gm44981       | 0,61 | No  |
| ENSMUSG00000108578 | 3,40E-02  | 2,419946342  | 6,34E-02  | 8,01E-01 | 9,61E-01 | Gm45700       | 1,02 | No  |
| ENSMUSG00000108584 | 6,23E-02  | 2,366833362  | 2,15E-01  | 6,43E-01 | 8,72E-01 | Gm45216       | 1,04 | No  |
| ENSMUSG00000108591 | 9,93E-02  | 2,830761263  | 7,03E-01  | 4,02E-01 | 7,00E-01 | Particl       | 1,07 | No  |
| ENSMUSG00000108592 | -3,93E-02 | -2,896106499 | 7,38E-04  | 9,78E-01 | 1,00E+00 | Gm38973       | 0,97 | No  |

|                    |           |              |           |          |          |               |      |     |
|--------------------|-----------|--------------|-----------|----------|----------|---------------|------|-----|
| ENSMUSG00000108593 | -7,94E-01 | -2,896102912 | 3,44E-01  | 5,57E-01 | 8,21E-01 | Gm44581       | 0,58 | No  |
| ENSMUSG00000108594 | 9,01E-03  | -3,107646452 | -5,16E-10 | 1,00E+00 | 1,00E+00 | Gm44770       | 1,01 | No  |
| ENSMUSG00000108595 | -4,91E-01 | -2,655105045 | 2,18E-01  | 6,41E-01 | 8,70E-01 | AC161456.1    | 0,71 | No  |
| ENSMUSG00000108596 | 2,37E-02  | 8,704897925  | 1,71E-01  | 6,80E-01 | 8,93E-01 | ltgam         | 1,02 | No  |
| ENSMUSG00000108599 | -4,21E+00 | -2,683077921 | 9,22E+00  | 2,39E-03 | 3,23E-02 | Gm10616       | 0,05 | Yes |
| ENSMUSG00000108602 | -2,39E-01 | -1,896195844 | 1,26E-01  | 7,22E-01 | 9,17E-01 | Klk1b10-ps    | 0,85 | No  |
| ENSMUSG00000108603 | 1,27E+00  | -2,832037691 | 9,95E-01  | 3,19E-01 | 6,19E-01 | 5330411O13Rik | 2,40 | No  |
| ENSMUSG00000108604 | -8,14E-02 | -2,832040318 | 4,55E-03  | 9,46E-01 | 1,00E+00 | Gm44850       | 0,95 | No  |
| ENSMUSG00000108607 | -6,09E-01 | -2,226269931 | 5,05E-01  | 4,77E-01 | 7,65E-01 | Gm44646       | 0,66 | No  |
| ENSMUSG00000108608 | -3,44E-01 | 1,98045897   | 5,24E+00  | 2,21E-02 | 1,61E-01 | Gm6916        | 0,79 | No  |
| ENSMUSG00000108609 | 8,54E-01  | -2,65513552  | 6,35E-01  | 4,25E-01 | 7,20E-01 | Gm7424        | 1,81 | No  |
| ENSMUSG00000108610 | 3,30E-01  | -2,655161781 | 1,12E-01  | 7,38E-01 | 9,26E-01 | Gm29725       | 1,26 | No  |
| ENSMUSG00000108613 | -3,88E-03 | -3,03362684  | 4,02E-12  | 1,00E+00 | 1,00E+00 | Gm36694       | 1,00 | No  |
| ENSMUSG00000108614 | -2,73E-01 | -0,36668176  | 6,29E-01  | 4,28E-01 | 7,22E-01 | 2610306O10Rik | 0,83 | No  |
| ENSMUSG00000108615 | 4,00E-02  | 7,146371947  | 4,41E-01  | 5,07E-01 | 7,91E-01 | Gm4973        | 1,03 | No  |
| ENSMUSG00000108616 | 9,97E-01  | -1,929375251 | 2,27E+00  | 1,32E-01 | 4,56E-01 | Gm35040       | 2,00 | No  |
| ENSMUSG00000108617 | 4,87E-01  | 0,288089708  | 3,54E+00  | 5,97E-02 | 3,02E-01 | Gm31749       | 1,40 | No  |
| ENSMUSG00000108618 | 1,17E+00  | -2,033721246 | 2,30E+00  | 1,29E-01 | 4,51E-01 | Gm44816       | 2,24 | No  |
| ENSMUSG00000108621 | 7,20E-02  | 4,660396494  | 8,92E-01  | 3,45E-01 | 6,46E-01 | Gm37494       | 1,05 | No  |
| ENSMUSG00000108622 | 2,07E-01  | 0,90421856   | 8,99E-01  | 3,43E-01 | 6,44E-01 | Gm36864       | 1,15 | No  |
| ENSMUSG00000108624 | 4,13E-01  | 2,780173417  | 1,16E+01  | 6,73E-04 | 1,17E-02 | Gm45091       | 1,33 | Yes |
| ENSMUSG00000108628 | 1,26E-01  | 0,563348935  | 2,66E-01  | 6,06E-01 | 8,50E-01 | Gm5037        | 1,09 | No  |
| ENSMUSG00000108633 | -1,48E+00 | -1,355547213 | 7,32E+00  | 6,80E-03 | 7,03E-02 | Gm44694       | 0,36 | No  |
| ENSMUSG00000108634 | -1,14E-02 | -3,033635021 | 1,50E-05  | 9,97E-01 | 1,00E+00 | Gm38534       | 0,99 | No  |
| ENSMUSG00000108636 | 1,87E+00  | -3,107639691 | 1,38E+00  | 2,40E-01 | 5,50E-01 | Gm44650       | 3,67 | No  |
| ENSMUSG00000108638 | 2,59E-02  | 1,680779094  | 2,54E-02  | 8,73E-01 | 1,00E+00 | Gm45150       | 1,02 | No  |
| ENSMUSG00000108640 | 3,17E-01  | -2,548166522 | 1,03E-01  | 7,49E-01 | 9,31E-01 | Gm44508       | 1,25 | No  |
| ENSMUSG00000108641 | 2,63E+00  | -2,96325892  | 2,67E+00  | 1,02E-01 | 3,94E-01 | Gm44807       | 6,19 | No  |
| ENSMUSG00000108643 | -2,46E-01 | -0,497605011 | 4,76E-01  | 4,90E-01 | 7,76E-01 | Gm44931       | 0,84 | No  |
| ENSMUSG00000108644 | 1,58E+00  | -2,711762231 | 1,70E+00  | 1,93E-01 | 5,50E-01 | Gm44920       | 2,98 | No  |
| ENSMUSG00000108648 | -9,77E-02 | -2,896145336 | 4,08E-03  | 9,49E-01 | 1,00E+00 | Gm44674       | 0,93 | No  |
| ENSMUSG00000108651 | -7,63E-02 | -1,079464125 | 2,59E-02  | 8,72E-01 | 1,00E+00 | Klk1b2-ps     | 0,95 | No  |

|                    |           |              |           |          |          |               |      |     |
|--------------------|-----------|--------------|-----------|----------|----------|---------------|------|-----|
| ENSMUSG00000108655 | 3,39E-01  | 2,053308143  | 5,45E+00  | 1,96E-02 | 1,49E-01 | Gm44949       | 1,26 | No  |
| ENSMUSG00000108658 | -1,77E+00 | -1,998005014 | 6,25E+00  | 1,24E-02 | 1,10E-01 | Gm45138       | 0,29 | No  |
| ENSMUSG00000108659 | -1,24E-03 | -1,165737255 | 7,72E-06  | 9,98E-01 | 1,00E+00 | Gm34121       | 1,00 | No  |
| ENSMUSG00000108660 | -8,92E-01 | -1,146136891 | 4,06E+00  | 4,38E-02 | 2,49E-01 | Gm21284       | 0,54 | No  |
| ENSMUSG00000108668 | -3,18E+00 | -2,831987063 | 4,25E+00  | 3,92E-02 | 2,35E-01 | Gm32816       | 0,11 | No  |
| ENSMUSG00000108670 | 9,01E-03  | -3,107646452 | -5,16E-10 | 1,00E+00 | 1,00E+00 | Gm44815       | 1,01 | No  |
| ENSMUSG00000108676 | -1,89E+00 | -3,1076441   | 1,42E+00  | 2,33E-01 | 5,50E-01 | 1700123J17Rik | 0,27 | No  |
| ENSMUSG00000108677 | 1,70E-01  | 1,511532735  | 9,43E-01  | 3,32E-01 | 6,32E-01 | Gm44759       | 1,13 | No  |
| ENSMUSG00000108681 | 4,91E-01  | 0,566046839  | 4,35E+00  | 3,70E-02 | 2,29E-01 | Gm17825       | 1,41 | No  |
| ENSMUSG00000108682 | 1,87E+00  | -3,107639691 | 1,38E+00  | 2,40E-01 | 5,50E-01 | Gm29754       | 3,67 | No  |
| ENSMUSG00000108686 | -3,06E-01 | -2,574209926 | 7,94E-02  | 7,78E-01 | 9,47E-01 | Gm45080       | 0,81 | No  |
| ENSMUSG00000108688 | 1,04E-01  | 0,099611874  | 1,41E-01  | 7,07E-01 | 9,08E-01 | Gm44985       | 1,07 | No  |
| ENSMUSG00000108689 | -1,45E+00 | -2,497558643 | 2,18E+00  | 1,40E-01 | 4,73E-01 | Gm45354       | 0,37 | No  |
| ENSMUSG00000108691 | 7,44E-01  | -2,896104463 | 3,02E-01  | 5,83E-01 | 8,38E-01 | Gm45226       | 1,67 | No  |
| ENSMUSG00000108693 | -4,45E-01 | -2,497529637 | 2,02E-01  | 6,53E-01 | 8,78E-01 | Gm45153       | 0,73 | No  |
| ENSMUSG00000108694 | -6,07E-01 | -0,051524096 | 3,89E+00  | 4,84E-02 | 2,65E-01 | Gm7287        | 0,66 | No  |
| ENSMUSG00000108695 | 3,69E-01  | -1,94625796  | 2,73E-01  | 6,01E-01 | 8,47E-01 | Gm2511        | 1,29 | No  |
| ENSMUSG00000108696 | 5,12E-01  | 1,770584764  | 9,86E+00  | 1,69E-03 | 2,44E-02 | Gm5738        | 1,43 | Yes |
| ENSMUSG00000108699 | 9,02E-01  | -1,963195165 | 1,52E+00  | 2,17E-01 | 5,50E-01 | Gm18988       | 1,87 | No  |
| ENSMUSG00000108700 | 2,28E+00  | -3,033651909 | 2,00E+00  | 1,58E-01 | 5,04E-01 | Gm7482        | 4,87 | No  |
| ENSMUSG00000108701 | -2,78E-01 | 2,774581925  | 5,49E+00  | 1,91E-02 | 1,47E-01 | Gm44616       | 0,83 | No  |
| ENSMUSG00000108702 | -3,83E-03 | 5,255995565  | 2,87E-03  | 9,57E-01 | 1,00E+00 | Gm9333        | 1,00 | No  |
| ENSMUSG00000108703 | 1,56E-01  | -2,107654357 | 4,20E-02  | 8,38E-01 | 9,82E-01 | Gm44793       | 1,11 | No  |
| ENSMUSG00000108704 | -7,11E-02 | -2,832005011 | 3,45E-03  | 9,53E-01 | 1,00E+00 | Gm44636       | 0,95 | No  |
| ENSMUSG00000108705 | 3,31E-01  | -0,30023629  | 9,94E-01  | 3,19E-01 | 6,19E-01 | Gm18905       | 1,26 | No  |
| ENSMUSG00000108709 | -4,55E-01 | -0,980331137 | 1,10E+00  | 2,94E-01 | 5,89E-01 | 4933431G14Rik | 0,73 | No  |
| ENSMUSG00000108714 | 4,00E-01  | 0,508568685  | 2,89E+00  | 8,90E-02 | 3,79E-01 | Gm21057       | 1,32 | No  |
| ENSMUSG00000108716 | 1,85E+00  | -3,107657832 | 1,35E+00  | 2,46E-01 | 5,50E-01 | Gm44902       | 3,61 | No  |
| ENSMUSG00000108717 | -1,89E+00 | -3,1076441   | 1,42E+00  | 2,33E-01 | 5,50E-01 | Gm44940       | 0,27 | No  |
| ENSMUSG00000108720 | 1,10E-01  | 0,746656791  | 2,35E-01  | 6,28E-01 | 8,61E-01 | Gm44672       | 1,08 | No  |
| ENSMUSG00000108724 | 1,58E+00  | -2,832029636 | 1,71E+00  | 1,91E-01 | 5,50E-01 | Gm44734       | 3,00 | No  |
| ENSMUSG00000108726 | 7,43E-01  | -2,896145754 | 3,01E-01  | 5,83E-01 | 8,38E-01 | Gm30684       | 1,67 | No  |

|                    |           |              |           |          |          |               |      |    |
|--------------------|-----------|--------------|-----------|----------|----------|---------------|------|----|
| ENSMUSG00000108727 | 7,54E-01  | -2,963279799 | 3,12E-01  | 5,77E-01 | 8,35E-01 | Gm44779       | 1,69 | No |
| ENSMUSG00000108728 | 1,85E+00  | -3,107657832 | 1,35E+00  | 2,46E-01 | 5,50E-01 | AC138221.1    | 3,61 | No |
| ENSMUSG00000108729 | -2,54E-01 | -1,896139894 | 1,42E-01  | 7,06E-01 | 9,08E-01 | Gm17831       | 0,84 | No |
| ENSMUSG00000108730 | -2,67E-01 | -1,896103088 | 1,24E-01  | 7,24E-01 | 9,18E-01 | Gm45135       | 0,83 | No |
| ENSMUSG00000108732 | -1,19E-01 | 1,156086268  | 3,72E-01  | 5,42E-01 | 8,11E-01 | 2310043P16Rik | 0,92 | No |
| ENSMUSG00000108736 | 3,00E-01  | -0,912665976 | 5,74E-01  | 4,49E-01 | 7,39E-01 | Gm45151       | 1,23 | No |
| ENSMUSG00000108737 | 1,16E+00  | -1,497605518 | 4,46E+00  | 3,48E-02 | 2,20E-01 | BC060293      | 2,23 | No |
| ENSMUSG00000108738 | 3,03E-01  | 2,59840836   | 5,50E+00  | 1,91E-02 | 1,46E-01 | Gm44777       | 1,23 | No |
| ENSMUSG00000108739 | 3,11E+00  | -2,71172536  | 3,95E+00  | 4,68E-02 | 2,59E-01 | Gm45096       | 8,64 | No |
| ENSMUSG00000108740 | -1,87E+00 | -2,963257051 | 1,41E+00  | 2,35E-01 | 5,50E-01 | Gm6008        | 0,27 | No |
| ENSMUSG00000108741 | -1,27E-01 | 1,062288591  | 3,70E-01  | 5,43E-01 | 8,12E-01 | Gm44553       | 0,92 | No |
| ENSMUSG00000108743 | -2,70E+00 | -3,033614577 | 2,89E+00  | 8,93E-02 | 3,79E-01 | Gm44881       | 0,15 | No |
| ENSMUSG00000108746 | -1,53E+00 | -2,401315282 | 3,40E+00  | 6,52E-02 | 3,20E-01 | Gm45198       | 0,35 | No |
| ENSMUSG00000108749 | 1,22E+00  | -3,146114919 | 6,90E-01  | 4,06E-01 | 7,02E-01 | Gm44767       | 2,33 | No |
| ENSMUSG00000108750 | -8,83E-01 | -2,070174896 | 1,40E+00  | 2,37E-01 | 5,50E-01 | Gm44750       | 0,54 | No |
| ENSMUSG00000108752 | -2,79E-01 | -0,424649246 | 5,25E-01  | 4,69E-01 | 7,57E-01 | Gm45191       | 0,82 | No |
| ENSMUSG00000108753 | -3,36E-02 | 0,892016973  | 2,34E-02  | 8,78E-01 | 1,00E+00 | Gm45094       | 0,98 | No |
| ENSMUSG00000108758 | 3,09E+00  | -2,896188865 | 3,89E+00  | 4,87E-02 | 2,66E-01 | Gm44921       | 8,50 | No |
| ENSMUSG00000108760 | -5,48E-01 | -2,770596125 | 2,35E-01  | 6,28E-01 | 8,61E-01 | Gm31897       | 0,68 | No |
| ENSMUSG00000108761 | -7,53E-02 | -1,929282835 | 1,05E-02  | 9,18E-01 | 1,00E+00 | Atp6v0c-ps1   | 0,95 | No |
| ENSMUSG00000108763 | 1,24E+00  | -1,998102003 | 2,10E+00  | 1,47E-01 | 4,86E-01 | Gm36028       | 2,37 | No |
| ENSMUSG00000108764 | -6,31E-03 | -1,268110659 | 1,73E-04  | 9,90E-01 | 1,00E+00 | Gm2926        | 1,00 | No |
| ENSMUSG00000108765 | -1,94E+00 | -3,107619243 | 1,50E+00  | 2,21E-01 | 5,50E-01 | Gm44580       | 0,26 | No |
| ENSMUSG00000108766 | 1,87E+00  | -3,107639691 | 1,38E+00  | 2,40E-01 | 5,50E-01 | Gm44760       | 3,67 | No |
| ENSMUSG00000108767 | 4,60E-01  | 0,431955282  | 3,55E+00  | 5,95E-02 | 3,02E-01 | Gm29763       | 1,38 | No |
| ENSMUSG00000108772 | -6,53E-02 | 4,04454911   | 5,61E-01  | 4,54E-01 | 7,44E-01 | Gm6063        | 0,96 | No |
| ENSMUSG00000108774 | -6,06E-02 | -2,770633036 | 2,49E-03  | 9,60E-01 | 1,00E+00 | Gm45136       | 0,96 | No |
| ENSMUSG00000108775 | 3,14E-02  | -3,107617333 | -7,69E-10 | 1,00E+00 | 1,00E+00 | Gm44540       | 1,02 | No |
| ENSMUSG00000108777 | 4,03E-03  | -0,165642605 | 1,50E-04  | 9,90E-01 | 1,00E+00 | Gm45081       | 1,00 | No |
| ENSMUSG00000108779 | 1,81E+00  | -3,10765737  | 1,28E+00  | 2,58E-01 | 5,50E-01 | Gm45691       | 3,49 | No |
| ENSMUSG00000108780 | -8,84E-03 | -0,912653528 | 4,48E-04  | 9,83E-01 | 1,00E+00 | 5430434F05Rik | 0,99 | No |
| ENSMUSG00000108783 | 3,12E+00  | -2,963299398 | 3,97E+00  | 4,62E-02 | 2,57E-01 | Gm36546       | 8,71 | No |

|                    |           |              |           |          |          |               |      |     |
|--------------------|-----------|--------------|-----------|----------|----------|---------------|------|-----|
| ENSMUSG00000108784 | -1,47E+00 | -1,509957723 | 6,33E+00  | 1,19E-02 | 1,06E-01 | 4930517G19Rik | 0,36 | No  |
| ENSMUSG00000108786 | -1,19E-02 | 1,861297089  | 5,69E-03  | 9,40E-01 | 1,00E+00 | Gm8309        | 0,99 | No  |
| ENSMUSG00000108787 | -1,94E+00 | -3,107619243 | 1,50E+00  | 2,21E-01 | 5,50E-01 | 2200007N16Rik | 0,26 | No  |
| ENSMUSG00000108791 | 1,17E+00  | -3,14612376  | 6,40E-01  | 4,24E-01 | 7,18E-01 | 1700011D18Rik | 2,26 | No  |
| ENSMUSG00000108793 | 2,01E-01  | 1,253589263  | 1,13E+00  | 2,88E-01 | 5,84E-01 | Gm45213       | 1,15 | No  |
| ENSMUSG00000108794 | 1,46E-01  | -2,10769485  | 3,72E-02  | 8,47E-01 | 9,87E-01 | Gm45195       | 1,11 | No  |
| ENSMUSG00000108797 | 1,21E+00  | -2,832007299 | 9,04E-01  | 3,42E-01 | 6,42E-01 | Klk1b23-ps    | 2,31 | No  |
| ENSMUSG00000108799 | 4,80E-02  | 6,453189833  | 5,83E-01  | 4,45E-01 | 7,36E-01 | Glud-ps       | 1,03 | No  |
| ENSMUSG00000108801 | -1,91E+00 | -2,963268868 | 1,45E+00  | 2,29E-01 | 5,50E-01 | Gm39090       | 0,27 | No  |
| ENSMUSG00000108802 | 2,63E+00  | -2,96325892  | 2,67E+00  | 1,02E-01 | 3,94E-01 | Gm44769       | 6,19 | No  |
| ENSMUSG00000108803 | -1,89E+00 | -3,033648118 | 1,42E+00  | 2,33E-01 | 5,50E-01 | 4930533N22Rik | 0,27 | No  |
| ENSMUSG00000108806 | 2,68E-01  | 3,869674926  | 8,43E+00  | 3,69E-03 | 4,46E-02 | Gm44729       | 1,20 | Yes |
| ENSMUSG00000108807 | 1,85E+00  | -3,107657832 | 1,35E+00  | 2,46E-01 | 5,50E-01 | 4833404L02Rik | 3,61 | No  |
| ENSMUSG00000108808 | -1,94E+00 | -3,107619243 | 1,50E+00  | 2,21E-01 | 5,50E-01 | Gm45204       | 0,26 | No  |
| ENSMUSG00000108810 | 3,14E-02  | -3,107617333 | -7,69E-10 | 1,00E+00 | 1,00E+00 | Gm44629       | 1,02 | No  |
| ENSMUSG00000108811 | -1,89E+00 | -3,1076441   | 1,42E+00  | 2,33E-01 | 5,50E-01 | 4933432K03Rik | 0,27 | No  |
| ENSMUSG00000108812 | -7,06E-01 | -2,107584021 | 8,49E-01  | 3,57E-01 | 6,58E-01 | C130083A15Rik | 0,61 | No  |
| ENSMUSG00000108813 | -1,86E+00 | -2,963205176 | 1,40E+00  | 2,36E-01 | 5,50E-01 | Rpl19-ps9     | 0,28 | No  |
| ENSMUSG00000108815 | -3,15E-03 | 5,676787326  | 2,16E-03  | 9,63E-01 | 1,00E+00 | AC149222.1    | 1,00 | No  |
| ENSMUSG00000108823 | -1,90E-01 | 1,146493671  | 9,14E-01  | 3,39E-01 | 6,39E-01 | Gm18959       | 0,88 | No  |
| ENSMUSG00000108825 | 2,28E-01  | 0,323846795  | 7,61E-01  | 3,83E-01 | 6,84E-01 | Gm45838       | 1,17 | No  |
| ENSMUSG00000108830 | 1,87E+00  | -3,107639691 | 1,38E+00  | 2,40E-01 | 5,50E-01 | Gm44661       | 3,67 | No  |
| ENSMUSG00000108831 | 2,90E-01  | -0,216276003 | 8,89E-01  | 3,46E-01 | 6,47E-01 | Gm7957        | 1,22 | No  |
| ENSMUSG00000108832 | -4,83E-03 | 0,527300201  | 4,16E-04  | 9,84E-01 | 1,00E+00 | Gm44832       | 1,00 | No  |
| ENSMUSG00000108833 | -6,41E-01 | -2,146156156 | 7,99E-01  | 3,71E-01 | 6,73E-01 | Gm17909       | 0,64 | No  |
| ENSMUSG00000108840 | -1,50E-01 | -1,785750221 | 5,35E-02  | 8,17E-01 | 9,70E-01 | Gm5320        | 0,90 | No  |
| ENSMUSG00000108842 | -7,60E-01 | -1,863719726 | 1,18E+00  | 2,78E-01 | 5,74E-01 | Gm45001       | 0,59 | No  |
| ENSMUSG00000108845 | -1,89E+00 | -3,1076441   | 1,42E+00  | 2,33E-01 | 5,50E-01 | Gm45090       | 0,27 | No  |
| ENSMUSG00000108849 | -2,65E+00 | -3,033633091 | 2,78E+00  | 9,55E-02 | 3,86E-01 | Gm35147       | 0,16 | No  |
| ENSMUSG00000108850 | 1,71E-01  | -0,726100173 | 1,71E-01  | 6,79E-01 | 8,93E-01 | Gm44914       | 1,13 | No  |
| ENSMUSG00000108852 | -3,04E-02 | 1,649851535  | 3,23E-02  | 8,57E-01 | 9,94E-01 | Gm44911       | 0,98 | No  |
| ENSMUSG00000108854 | 6,95E-01  | -2,963260828 | 2,60E-01  | 6,10E-01 | 8,51E-01 | D830036C21Rik | 1,62 | No  |

|                    |           |              |           |          |          |               |      |     |
|--------------------|-----------|--------------|-----------|----------|----------|---------------|------|-----|
| ENSMUSG00000108855 | -1,94E+00 | -3,107619243 | 1,50E+00  | 2,21E-01 | 5,50E-01 | Gm44917       | 0,26 | No  |
| ENSMUSG00000108858 | 7,31E-01  | -2,963279337 | 2,91E-01  | 5,90E-01 | 8,41E-01 | Gm4587        | 1,66 | No  |
| ENSMUSG00000108859 | -8,40E-01 | -2,831964157 | 3,87E-01  | 5,34E-01 | 8,07E-01 | Gm44776       | 0,56 | No  |
| ENSMUSG00000108860 | 9,01E-03  | -3,107646452 | -5,16E-10 | 1,00E+00 | 1,00E+00 | Gm6070        | 1,01 | No  |
| ENSMUSG00000108865 | -1,89E+00 | -3,1076441   | 1,42E+00  | 2,33E-01 | 5,50E-01 | Gm44617       | 0,27 | No  |
| ENSMUSG00000108866 | 3,14E-02  | -3,107617333 | -7,69E-10 | 1,00E+00 | 1,00E+00 | Gm35082       | 1,02 | No  |
| ENSMUSG00000108871 | 1,17E+00  | -3,070185219 | 6,52E-01  | 4,19E-01 | 7,15E-01 | Gm45102       | 2,25 | No  |
| ENSMUSG00000108872 | -5,55E-01 | -2,770614243 | 2,41E-01  | 6,24E-01 | 8,58E-01 | Dlg2          | 0,68 | No  |
| ENSMUSG00000108873 | 2,74E-02  | -3,033621357 | 9,16E-12  | 1,00E+00 | 1,00E+00 | Gm44609       | 1,02 | No  |
| ENSMUSG00000108874 | -2,61E-01 | 2,325835203  | 3,61E+00  | 5,76E-02 | 2,96E-01 | Gm9711        | 0,83 | No  |
| ENSMUSG00000108875 | 1,81E+00  | -3,10765737  | 1,28E+00  | 2,58E-01 | 5,50E-01 | Gm45064       | 3,49 | No  |
| ENSMUSG00000108878 | 2,94E-01  | 2,754176697  | 5,99E+00  | 1,44E-02 | 1,22E-01 | AC154141.1    | 1,23 | No  |
| ENSMUSG00000108880 | 2,18E-01  | 1,824072191  | 1,86E+00  | 1,73E-01 | 5,30E-01 | Gm44560       | 1,16 | No  |
| ENSMUSG00000108883 | 1,00E+00  | -2,033684767 | 2,29E+00  | 1,30E-01 | 4,54E-01 | Gm44623       | 2,00 | No  |
| ENSMUSG00000108886 | 3,09E-01  | -2,226238667 | 1,75E-01  | 6,76E-01 | 8,91E-01 | Gm44830       | 1,24 | No  |
| ENSMUSG00000108888 | -7,13E-02 | -0,726293907 | 3,49E-02  | 8,52E-01 | 9,90E-01 | Gm45231       | 0,95 | No  |
| ENSMUSG00000108892 | 5,42E-01  | 3,438501649  | 2,80E+01  | 1,19E-07 | 6,50E-06 | Gm9449        | 1,46 | Yes |
| ENSMUSG00000108894 | 5,90E-01  | -1,816434508 | 7,49E-01  | 3,87E-01 | 6,87E-01 | Gm45841       | 1,51 | No  |
| ENSMUSG00000108895 | -4,69E-01 | -1,770633184 | 5,85E-01  | 4,44E-01 | 7,36E-01 | Gm45070       | 0,72 | No  |
| ENSMUSG00000108896 | -1,89E+00 | -3,1076441   | 1,42E+00  | 2,33E-01 | 5,50E-01 | Gm20136       | 0,27 | No  |
| ENSMUSG00000108897 | 1,55E-01  | 1,273730832  | 7,00E-01  | 4,03E-01 | 7,01E-01 | Gm44861       | 1,11 | No  |
| ENSMUSG00000108900 | 3,07E-01  | -2,655142439 | 9,59E-02  | 7,57E-01 | 9,35E-01 | C430049E01Rik | 1,24 | No  |
| ENSMUSG00000108905 | 1,87E+00  | -3,107639691 | 1,38E+00  | 2,40E-01 | 5,50E-01 | Gm44618       | 3,67 | No  |
| ENSMUSG00000108906 | 3,49E-02  | 0,199100918  | 1,47E-02  | 9,04E-01 | 1,00E+00 | Gm8314        | 1,02 | No  |
| ENSMUSG00000108910 | 1,37E+00  | -2,497621878 | 1,91E+00  | 1,67E-01 | 5,20E-01 | Gm44625       | 2,58 | No  |
| ENSMUSG00000108911 | -7,54E-02 | 2,526232816  | 3,52E-01  | 5,53E-01 | 8,19E-01 | Gm45113       | 0,95 | No  |
| ENSMUSG00000108912 | 7,26E-01  | -2,107753824 | 9,42E-01  | 3,32E-01 | 6,32E-01 | E230020D15Rik | 1,65 | No  |
| ENSMUSG00000108915 | -8,10E-01 | -2,963247942 | 3,56E-01  | 5,51E-01 | 8,17E-01 | Gm44966       | 0,57 | No  |
| ENSMUSG00000108916 | 4,59E-01  | -2,548165117 | 1,64E-01  | 6,85E-01 | 8,97E-01 | Gm18944       | 1,37 | No  |
| ENSMUSG00000108923 | 3,83E-01  | 0,568920669  | 2,60E+00  | 1,07E-01 | 4,00E-01 | 4933431C10Rik | 1,30 | No  |
| ENSMUSG00000108926 | 7,21E-01  | -2,832020764 | 2,83E-01  | 5,95E-01 | 8,43E-01 | Gm10988       | 1,65 | No  |
| ENSMUSG00000108929 | -1,48E+00 | -2,401302113 | 2,28E+00  | 1,31E-01 | 4,55E-01 | Cc2d2b        | 0,36 | No  |

|                    |           |              |           |          |          |               |      |     |
|--------------------|-----------|--------------|-----------|----------|----------|---------------|------|-----|
| ENSMUSG00000108930 | -4,13E-02 | -3,033659495 | 7,08E-04  | 9,79E-01 | 1,00E+00 | Gm10648       | 0,97 | No  |
| ENSMUSG00000108934 | -9,62E-01 | -1,74070312  | 2,01E+00  | 1,56E-01 | 5,01E-01 | Gm44732       | 0,51 | No  |
| ENSMUSG00000108935 | -1,59E-01 | -1,366876641 | 1,04E-01  | 7,47E-01 | 9,30E-01 | 4930588G17Rik | 0,90 | No  |
| ENSMUSG00000108936 | -8,21E-01 | -2,448693742 | 9,83E-01  | 3,21E-01 | 6,22E-01 | Gm8745        | 0,57 | No  |
| ENSMUSG00000108937 | 9,58E-01  | -1,574366522 | 3,01E+00  | 8,29E-02 | 3,70E-01 | Gm18908       | 1,94 | No  |
| ENSMUSG00000108940 | 5,48E-01  | -1,247140221 | 1,20E+00  | 2,73E-01 | 5,69E-01 | Gm45719       | 1,46 | No  |
| ENSMUSG00000108942 | -2,49E+00 | -2,655098567 | 5,39E+00  | 2,02E-02 | 1,52E-01 | Gm44660       | 0,18 | No  |
| ENSMUSG00000108943 | 1,26E+00  | -2,448677009 | 2,16E+00  | 1,42E-01 | 4,75E-01 | Gm44559       | 2,40 | No  |
| ENSMUSG00000108946 | -3,17E-01 | -2,401322222 | 1,50E-01  | 6,99E-01 | 9,04E-01 | Gm18598       | 0,80 | No  |
| ENSMUSG00000108947 | 1,80E+00  | -3,070187705 | 1,28E+00  | 2,58E-01 | 5,50E-01 | Olfr1422-ps1  | 3,47 | No  |
| ENSMUSG00000108954 | 1,42E-01  | 1,114055706  | 5,11E-01  | 4,75E-01 | 7,63E-01 | Gm44901       | 1,10 | No  |
| ENSMUSG00000108955 | -7,97E-02 | 0,592925973  | 1,12E-01  | 7,38E-01 | 9,26E-01 | Gm44775       | 0,95 | No  |
| ENSMUSG00000108957 | -4,55E-01 | -0,497693347 | 1,65E+00  | 1,99E-01 | 5,50E-01 | Gm45235       | 0,73 | No  |
| ENSMUSG00000108958 | -4,98E-02 | -2,600660896 | 2,26E-03  | 9,62E-01 | 1,00E+00 | Gm21032       | 0,97 | No  |
| ENSMUSG00000108959 | 1,82E+00  | -3,033661385 | 1,31E+00  | 2,52E-01 | 5,50E-01 | Gm44697       | 3,54 | No  |
| ENSMUSG00000108960 | 7,43E-01  | -2,963261206 | 3,01E-01  | 5,83E-01 | 8,38E-01 | Gm44943       | 1,67 | No  |
| ENSMUSG00000108961 | 9,01E-03  | -3,107646452 | -5,16E-10 | 1,00E+00 | 1,00E+00 | Gm32540       | 1,01 | No  |
| ENSMUSG00000108962 | -1,87E+00 | -3,107637761 | 1,39E+00  | 2,38E-01 | 5,50E-01 | Gm44959       | 0,27 | No  |
| ENSMUSG00000108963 | 5,33E-01  | -0,832115342 | 1,65E+00  | 1,98E-01 | 5,50E-01 | Gm16478       | 1,45 | No  |
| ENSMUSG00000108964 | 1,85E+00  | -2,963247546 | 1,34E+00  | 2,48E-01 | 5,50E-01 | Gm18600       | 3,59 | No  |
| ENSMUSG00000108967 | -1,87E+00 | -3,03364178  | 1,41E+00  | 2,36E-01 | 5,50E-01 | Gm45181       | 0,27 | No  |
| ENSMUSG00000108968 | -2,22E-01 | -1,801017389 | 1,20E-01  | 7,29E-01 | 9,20E-01 | Gm45011       | 0,86 | No  |
| ENSMUSG00000108971 | 3,14E-02  | -3,107617333 | -7,69E-10 | 1,00E+00 | 1,00E+00 | Gm18210       | 1,02 | No  |
| ENSMUSG00000108975 | 1,81E+00  | -3,10765737  | 1,28E+00  | 2,58E-01 | 5,50E-01 | Mlnr-ps       | 3,49 | No  |
| ENSMUSG00000108976 | 2,53E-02  | -2,963236633 | 1,27E-11  | 1,00E+00 | 1,00E+00 | Gm29797       | 1,02 | No  |
| ENSMUSG00000108979 | -4,86E-01 | -2,14604182  | 4,06E-01  | 5,24E-01 | 8,01E-01 | 1700016B15Rik | 0,71 | No  |
| ENSMUSG00000108980 | -2,16E+00 | -2,107446348 | 8,28E+00  | 4,01E-03 | 4,74E-02 | Gm45155       | 0,22 | Yes |
| ENSMUSG00000108984 | -2,72E-01 | -2,146138975 | 1,28E-01  | 7,20E-01 | 9,15E-01 | Gm44916       | 0,83 | No  |
| ENSMUSG00000108985 | -7,50E-02 | -2,333168676 | 6,43E-03  | 9,36E-01 | 1,00E+00 | A930030B08Rik | 0,95 | No  |
| ENSMUSG00000108989 | -8,93E-02 | -2,96327978  | 3,63E-03  | 9,52E-01 | 1,00E+00 | Gm44984       | 0,94 | No  |
| ENSMUSG00000108990 | 2,65E+00  | -3,033655087 | 2,73E+00  | 9,86E-02 | 3,91E-01 | Gm44648       | 6,30 | No  |
| ENSMUSG00000108991 | -1,32E-01 | -0,587325925 | 1,34E-01  | 7,14E-01 | 9,12E-01 | Gm45807       | 0,91 | No  |



|                    |           |              |          |          |          |               |  |      |     |
|--------------------|-----------|--------------|----------|----------|----------|---------------|--|------|-----|
| ENSMUSG00000108992 | 1,09E+00  | -2,424929748 | 1,13E+00 | 2,89E-01 | 5,84E-01 | Gm19092       |  | 2,13 | No  |
| ENSMUSG00000108994 | 4,72E-01  | -2,770620413 | 1,75E-01 | 6,76E-01 | 8,91E-01 | Gm31663       |  | 1,39 | No  |
| ENSMUSG00000109002 | -1,26E+00 | -3,107648018 | 7,30E-01 | 3,93E-01 | 6,93E-01 | Gm38405       |  | 0,42 | No  |
| ENSMUSG00000109005 | -2,39E-01 | 6,227296745  | 1,34E+01 | 2,53E-04 | 5,28E-03 | Gm45221       |  | 0,85 | Yes |
| ENSMUSG00000109008 | 5,38E-01  | -1,195616127 | 1,24E+00 | 2,65E-01 | 5,61E-01 | Gm44899       |  | 1,45 | No  |
| ENSMUSG00000109015 | 5,81E-01  | 0,070612528  | 3,55E+00 | 5,95E-02 | 3,02E-01 | Gm31024       |  | 1,50 | No  |
| ENSMUSG00000109016 | -8,94E-02 | -2,497657026 | 7,20E-03 | 9,32E-01 | 1,00E+00 | Gm44647       |  | 0,94 | No  |
| ENSMUSG00000109017 | -2,70E+00 | -3,033614577 | 2,89E+00 | 8,93E-02 | 3,79E-01 | Gm38979       |  | 0,15 | No  |
| ENSMUSG00000109022 | 1,87E+00  | -3,107639691 | 1,38E+00 | 2,40E-01 | 5,50E-01 | Olfr1432      |  | 3,67 | No  |
| ENSMUSG00000109030 | -1,94E+00 | -3,107619243 | 1,50E+00 | 2,21E-01 | 5,50E-01 | Olfr1421-ps1  |  | 0,26 | No  |
| ENSMUSG00000109032 | 1,31E-01  | -0,92924055  | 9,05E-02 | 7,63E-01 | 9,39E-01 | Gm7972        |  | 1,10 | No  |
| ENSMUSG00000109035 | -2,65E+00 | -3,033633091 | 2,78E+00 | 9,55E-02 | 3,86E-01 | Gm45209       |  | 0,16 | No  |
| ENSMUSG00000109036 | 1,33E-01  | 2,118774826  | 8,68E-01 | 3,52E-01 | 6,53E-01 | 2210406H18Rik |  | 1,10 | No  |
| ENSMUSG00000109038 | 5,11E-01  | -0,384335216 | 2,29E+00 | 1,30E-01 | 4,52E-01 | Gm45120       |  | 1,43 | No  |
| ENSMUSG00000109045 | -3,64E+00 | -1,548065345 | 1,67E+01 | 4,35E-05 | 1,21E-03 | Gm45084       |  | 0,08 | Yes |
| ENSMUSG00000109046 | -1,89E+00 | -3,1076441   | 1,42E+00 | 2,33E-01 | 5,50E-01 | Gm44571       |  | 0,27 | No  |
| ENSMUSG00000109047 | 1,85E+00  | -3,070170028 | 1,35E+00 | 2,46E-01 | 5,50E-01 | Gm45115       |  | 3,62 | No  |
| ENSMUSG00000109049 | -5,66E-01 | -2,831953833 | 2,51E-01 | 6,16E-01 | 8,55E-01 | 4930479H17Rik |  | 0,68 | No  |
| ENSMUSG00000109051 | -1,59E-02 | -2,96323932  | 1,18E-04 | 9,91E-01 | 1,00E+00 | Gm44913       |  | 0,99 | No  |
| ENSMUSG00000109054 | 3,90E-01  | -1,929336949 | 2,43E-01 | 6,22E-01 | 8,58E-01 | Gm44789       |  | 1,31 | No  |
| ENSMUSG00000109055 | -1,19E+00 | -2,401383024 | 1,83E+00 | 1,77E-01 | 5,36E-01 | Gm2676        |  | 0,44 | No  |
| ENSMUSG00000109056 | 1,66E+00  | -2,963280302 | 1,36E+00 | 2,44E-01 | 5,50E-01 | A630009H07Rik |  | 3,17 | No  |
| ENSMUSG00000109059 | -5,43E-01 | 0,334813034  | 4,06E+00 | 4,39E-02 | 2,50E-01 | Gm9354        |  | 0,69 | No  |
| ENSMUSG00000109061 | 2,94E-02  | 3,65947971   | 9,27E-02 | 7,61E-01 | 9,37E-01 | Map2k7        |  | 1,02 | No  |
| ENSMUSG00000109062 | -6,24E-01 | -1,863621973 | 9,81E-01 | 3,22E-01 | 6,22E-01 | Gm44622       |  | 0,65 | No  |
| ENSMUSG00000109073 | -3,17E+00 | -2,770562034 | 4,24E+00 | 3,96E-02 | 2,36E-01 | Gm44975       |  | 0,11 | No  |
| ENSMUSG00000109074 | -1,61E-01 | -1,069867034 | 8,78E-02 | 7,67E-01 | 9,40E-01 | Gm45162       |  | 0,89 | No  |
| ENSMUSG00000109080 | -1,22E+00 | -3,146113954 | 6,96E-01 | 4,04E-01 | 7,01E-01 | Gm38944       |  | 0,43 | No  |
| ENSMUSG00000109084 | -1,90E+00 | -3,033594154 | 1,44E+00 | 2,30E-01 | 5,50E-01 | Gm44955       |  | 0,27 | No  |
| ENSMUSG00000109086 | 1,22E-01  | 3,42516458   | 1,44E+00 | 2,30E-01 | 5,50E-01 | Gm5596        |  | 1,09 | No  |
| ENSMUSG00000109087 | -2,63E-02 | -3,033641358 | 2,33E-04 | 9,88E-01 | 1,00E+00 | Gm45105       |  | 0,98 | No  |
| ENSMUSG00000109089 | 2,87E+00  | -2,998047307 | 3,25E+00 | 7,15E-02 | 3,39E-01 | 4833411C07Rik |  | 7,29 | No  |

|                    |           |              |           |          |          |               |      |     |
|--------------------|-----------|--------------|-----------|----------|----------|---------------|------|-----|
| ENSMUSG00000109090 | -1,87E+00 | -3,107637761 | 1,39E+00  | 2,38E-01 | 5,50E-01 | Gm45088       | 0,27 | No  |
| ENSMUSG00000109096 | -1,35E+00 | -1,929304117 | 3,88E+00  | 4,88E-02 | 2,66E-01 | Gm44888       | 0,39 | No  |
| ENSMUSG00000109097 | -1,90E+00 | -3,033647263 | 1,44E+00  | 2,30E-01 | 5,50E-01 | Gm29683       | 0,27 | No  |
| ENSMUSG00000109102 | 1,20E+00  | -2,472956913 | 1,65E+00  | 1,99E-01 | 5,50E-01 | 1700019A23Rik | 2,29 | No  |
| ENSMUSG00000109104 | 9,01E-03  | -3,107646452 | -5,16E-10 | 1,00E+00 | 1,00E+00 | Gm6108        | 1,01 | No  |
| ENSMUSG00000109105 | -1,18E+00 | -2,448676994 | 1,79E+00  | 1,81E-01 | 5,43E-01 | Gm44873       | 0,44 | No  |
| ENSMUSG00000109106 | -1,87E+00 | -3,107637761 | 1,39E+00  | 2,38E-01 | 5,50E-01 | 4933430H16Rik | 0,27 | No  |
| ENSMUSG00000109107 | -1,74E+00 | -2,770557664 | 2,09E+00  | 1,48E-01 | 4,87E-01 | Gm44781       | 0,30 | No  |
| ENSMUSG00000109108 | -5,73E-01 | -0,896136024 | 1,63E+00  | 2,02E-01 | 5,50E-01 | Gm36371       | 0,67 | No  |
| ENSMUSG00000109109 | -4,97E-02 | -2,711729894 | 1,15E-03  | 9,73E-01 | 1,00E+00 | Gm44953       | 0,97 | No  |
| ENSMUSG00000109110 | 5,34E-02  | -0,413196233 | 2,25E-02  | 8,81E-01 | 1,00E+00 | Gm45014       | 1,04 | No  |
| ENSMUSG00000109111 | 7,75E-01  | -1,366958132 | 2,32E+00  | 1,28E-01 | 4,49E-01 | 6530437J22Rik | 1,71 | No  |
| ENSMUSG00000109113 | -1,22E+00 | -3,146113954 | 6,96E-01  | 4,04E-01 | 7,01E-01 | Gm32916       | 0,43 | No  |
| ENSMUSG00000109115 | -4,53E-01 | -1,800943264 | 5,71E-01  | 4,50E-01 | 7,40E-01 | Gm44669       | 0,73 | No  |
| ENSMUSG00000109118 | 2,30E-01  | 0,875430319  | 1,13E+00  | 2,88E-01 | 5,84E-01 | Gm32031       | 1,17 | No  |
| ENSMUSG00000109119 | -5,20E-01 | 0,359279678  | 3,61E+00  | 5,73E-02 | 2,95E-01 | Gm44752       | 0,70 | No  |
| ENSMUSG00000109121 | -1,94E+00 | -3,107619243 | 1,50E+00  | 2,21E-01 | 5,50E-01 | Gm44644       | 0,26 | No  |
| ENSMUSG00000109122 | -6,37E-01 | -2,033736686 | 5,51E-01  | 4,58E-01 | 7,47E-01 | A230103L15Rik | 0,64 | No  |
| ENSMUSG00000109123 | -3,52E-01 | -2,548262365 | 1,55E-01  | 6,93E-01 | 9,01E-01 | Gm39059       | 0,78 | No  |
| ENSMUSG00000109124 | -1,06E-01 | -3,033634182 | 5,86E-03  | 9,39E-01 | 1,00E+00 | Gm44516       | 0,93 | No  |
| ENSMUSG00000109129 | -2,41E-01 | 2,590502534  | 3,66E+00  | 5,56E-02 | 2,89E-01 | Gm44973       | 0,85 | No  |
| ENSMUSG00000109130 | -6,00E-02 | 1,788104444  | 1,42E-01  | 7,06E-01 | 9,08E-01 | Gm45187       | 0,96 | No  |
| ENSMUSG00000109132 | 2,42E+00  | -1,929336814 | 8,35E+00  | 3,86E-03 | 4,60E-02 | Gm44545       | 5,34 | Yes |
| ENSMUSG00000109133 | 1,89E+00  | -3,033614598 | 1,38E+00  | 2,40E-01 | 5,50E-01 | Gm45098       | 3,70 | No  |
| ENSMUSG00000109134 | 1,08E+00  | -3,033654122 | 5,01E-01  | 4,79E-01 | 7,66E-01 | Gm45076       | 2,11 | No  |
| ENSMUSG00000109135 | -1,87E+00 | -3,03364178  | 1,41E+00  | 2,36E-01 | 5,50E-01 | Gm6240        | 0,27 | No  |
| ENSMUSG00000109136 | -1,89E+00 | -3,1076441   | 1,42E+00  | 2,33E-01 | 5,50E-01 | Gm45114       | 0,27 | No  |
| ENSMUSG00000109143 | -3,83E-02 | -3,107651936 | -7,91E-11 | 1,00E+00 | 1,00E+00 | Gm10046       | 0,97 | No  |
| ENSMUSG00000109147 | -2,97E-01 | -0,847860917 | 4,89E-01  | 4,84E-01 | 7,72E-01 | 4930431P19Rik | 0,81 | No  |
| ENSMUSG00000109149 | 1,18E+00  | -2,311226086 | 2,36E+00  | 1,24E-01 | 4,41E-01 | Gm19656       | 2,27 | No  |
| ENSMUSG00000109154 | -2,67E-01 | -1,278815741 | 3,12E-01  | 5,76E-01 | 8,35E-01 | Gm44822       | 0,83 | No  |
| ENSMUSG00000109157 | -1,48E-01 | 1,318532065  | 5,90E-01  | 4,42E-01 | 7,34E-01 | Gm44829       | 0,90 | No  |

|                    |           |              |           |          |          |               |      |    |
|--------------------|-----------|--------------|-----------|----------|----------|---------------|------|----|
| ENSMUSG00000109160 | 1,81E+00  | -3,10765737  | 1,28E+00  | 2,58E-01 | 5,50E-01 | 4930598N05Rik | 3,49 | No |
| ENSMUSG00000109162 | 3,14E-02  | -3,107617333 | -7,69E-10 | 1,00E+00 | 1,00E+00 | 2900027M19Rik | 1,02 | No |
| ENSMUSG00000109163 | 9,01E-03  | -3,107646452 | -5,16E-10 | 1,00E+00 | 1,00E+00 | 3110009M11Rik | 1,01 | No |
| ENSMUSG00000109164 | -4,06E-01 | -1,226187872 | 6,92E-01  | 4,05E-01 | 7,02E-01 | Gm45085       | 0,75 | No |
| ENSMUSG00000109165 | -6,49E-01 | -1,535388697 | 1,25E+00  | 2,63E-01 | 5,57E-01 | Gm45148       | 0,64 | No |
| ENSMUSG00000109167 | 5,34E-01  | -1,785651031 | 6,00E-01  | 4,39E-01 | 7,31E-01 | Gm44652       | 1,45 | No |
| ENSMUSG00000109168 | 5,82E-02  | 3,6960898    | 3,74E-01  | 5,41E-01 | 8,11E-01 | Gm44709       | 1,04 | No |
| ENSMUSG00000109171 | -2,74E+00 | -3,033596063 | 2,99E+00  | 8,38E-02 | 3,71E-01 | Gm5735        | 0,15 | No |
| ENSMUSG00000109172 | -3,73E-01 | -2,401396529 | 1,75E-01  | 6,75E-01 | 8,91E-01 | Gm21035       | 0,77 | No |
| ENSMUSG00000109173 | 3,07E+00  | -2,963298475 | 3,83E+00  | 5,02E-02 | 2,72E-01 | Gm21036       | 8,41 | No |
| ENSMUSG00000109177 | -3,21E-01 | 1,97350844   | 4,50E+00  | 3,39E-02 | 2,17E-01 | Pafah1b1-ps2  | 0,80 | No |
| ENSMUSG00000109179 | -9,16E-02 | 1,288092207  | 2,47E-01  | 6,19E-01 | 8,56E-01 | Gm35339       | 0,94 | No |
| ENSMUSG00000109181 | -2,09E-01 | -0,278840164 | 4,33E-01  | 5,11E-01 | 7,94E-01 | Gm5605        | 0,87 | No |
| ENSMUSG00000109186 | -5,52E-01 | -2,448648288 | 3,64E-01  | 5,46E-01 | 8,14E-01 | Gm34821       | 0,68 | No |
| ENSMUSG00000109188 | 1,07E+00  | -2,448739431 | 1,28E+00  | 2,58E-01 | 5,50E-01 | Gm18213       | 2,10 | No |
| ENSMUSG00000109190 | -2,63E-02 | -2,711700743 | 5,72E-04  | 9,81E-01 | 1,00E+00 | Gm44621       | 0,98 | No |
| ENSMUSG00000109191 | -1,89E+00 | -3,1076441   | 1,42E+00  | 2,33E-01 | 5,50E-01 | Gm45131       | 0,27 | No |
| ENSMUSG00000109195 | -8,57E-01 | -2,770615815 | 4,03E-01  | 5,26E-01 | 8,03E-01 | Gm45038       | 0,55 | No |
| ENSMUSG00000109198 | 9,39E-02  | 2,510425126  | 5,29E-01  | 4,67E-01 | 7,55E-01 | D7Bwg0826e    | 1,07 | No |
| ENSMUSG00000109199 | 1,87E+00  | -3,107639691 | 1,38E+00  | 2,40E-01 | 5,50E-01 | Gm44996       | 3,67 | No |
| ENSMUSG00000109200 | 1,85E+00  | -3,107657832 | 1,35E+00  | 2,46E-01 | 5,50E-01 | Gm44969       | 3,61 | No |
| ENSMUSG00000109205 | 1,78E-01  | -2,226179351 | 4,71E-02  | 8,28E-01 | 9,76E-01 | Gm44954       | 1,13 | No |
| ENSMUSG00000109206 | -1,12E-01 | 1,272165726  | 3,45E-01  | 5,57E-01 | 8,21E-01 | Gm45137       | 0,93 | No |
| ENSMUSG00000109209 | 1,85E+00  | -3,107657832 | 1,35E+00  | 2,46E-01 | 5,50E-01 | Gm45104       | 3,61 | No |
| ENSMUSG00000109214 | 2,98E-01  | -1,424901314 | 3,29E-01  | 5,66E-01 | 8,29E-01 | Gm44659       | 1,23 | No |
| ENSMUSG00000109215 | -3,83E-02 | -3,107651936 | -7,91E-11 | 1,00E+00 | 1,00E+00 | 4930453L07Rik | 0,97 | No |
| ENSMUSG00000109216 | -1,45E+00 | -1,755557481 | 3,76E+00  | 5,24E-02 | 2,79E-01 | Gm44907       | 0,37 | No |
| ENSMUSG00000109218 | 7,67E-01  | -2,963261668 | 3,24E-01  | 5,69E-01 | 8,30E-01 | Gm44872       | 1,70 | No |
| ENSMUSG00000109221 | 1,87E+00  | -3,107639691 | 1,38E+00  | 2,40E-01 | 5,50E-01 | Gm9375        | 3,67 | No |
| ENSMUSG00000109222 | -6,91E-02 | 2,423416243  | 2,74E-01  | 6,00E-01 | 8,47E-01 | Gm10297       | 0,95 | No |
| ENSMUSG00000109223 | -2,63E-02 | -3,033641358 | 2,33E-04  | 9,88E-01 | 1,00E+00 | Gm45116       | 0,98 | No |
| ENSMUSG00000109224 | 4,37E-01  | -1,382186197 | 7,64E-01  | 3,82E-01 | 6,83E-01 | AC167978.1    | 1,35 | No |

|                    |           |              |          |          |          |               |       |     |
|--------------------|-----------|--------------|----------|----------|----------|---------------|-------|-----|
| ENSMUSG00000109225 | -5,71E-01 | -2,655108758 | 2,56E-01 | 6,13E-01 | 8,53E-01 | 4930513N20Rik | 0,67  | No  |
| ENSMUSG00000109227 | 9,88E-02  | -0,847779667 | 6,02E-02 | 8,06E-01 | 9,64E-01 | Gm29791       | 1,07  | No  |
| ENSMUSG00000109228 | 4,38E-01  | -2,740887165 | 1,50E-01 | 6,99E-01 | 9,04E-01 | Fam81b        | 1,35  | No  |
| ENSMUSG00000109231 | 3,63E-02  | 0,610209393  | 2,41E-02 | 8,77E-01 | 1,00E+00 | Gm45737       | 1,03  | No  |
| ENSMUSG00000109232 | -1,01E+00 | -2,165800907 | 1,58E+00 | 2,09E-01 | 5,50E-01 | Gm44577       | 0,50  | No  |
| ENSMUSG00000109235 | 4,36E-01  | 0,995330282  | 4,55E+00 | 3,30E-02 | 2,13E-01 | Gm5997        | 1,35  | No  |
| ENSMUSG00000109236 | -2,54E-01 | -1,998084814 | 1,27E-01 | 7,22E-01 | 9,16E-01 | Gm44833       | 0,84  | No  |
| ENSMUSG00000109238 | -7,90E-01 | -1,195658941 | 2,41E+00 | 1,20E-01 | 4,32E-01 | Gm35060       | 0,58  | No  |
| ENSMUSG00000109241 | -1,30E-01 | 3,762552409  | 1,97E+00 | 1,61E-01 | 5,09E-01 | Gm7434        | 0,91  | No  |
| ENSMUSG00000109243 | 1,93E-01  | 4,250410678  | 5,10E+00 | 2,40E-02 | 1,70E-01 | Gm45867       | 1,14  | No  |
| ENSMUSG00000109244 | 2,88E-01  | 2,857537644  | 5,85E+00 | 1,56E-02 | 1,29E-01 | Gm44751       | 1,22  | No  |
| ENSMUSG00000109245 | 4,55E-01  | 1,032273484  | 5,11E+00 | 2,38E-02 | 1,69E-01 | Gm44860       | 1,37  | No  |
| ENSMUSG00000109248 | 7,37E-01  | -2,226397183 | 9,69E-01 | 3,25E-01 | 6,26E-01 | Gm44993       | 1,67  | No  |
| ENSMUSG00000109251 | -6,75E-02 | 2,174336274  | 2,21E-01 | 6,38E-01 | 8,68E-01 | E230032D23Rik | 0,95  | No  |
| ENSMUSG00000109255 | 6,48E-02  | 6,78507119   | 1,11E+00 | 2,91E-01 | 5,87E-01 | Gm7407        | 1,05  | No  |
| ENSMUSG00000109257 | 2,62E+00  | -3,033654625 | 2,66E+00 | 1,03E-01 | 3,95E-01 | Gm45200       | 6,16  | No  |
| ENSMUSG00000109258 | -1,95E+00 | -2,832019643 | 1,48E+00 | 2,24E-01 | 5,50E-01 | 5330413D20Rik | 0,26  | No  |
| ENSMUSG00000109266 | -1,90E+00 | -3,033594154 | 1,44E+00 | 2,30E-01 | 5,50E-01 | Gm6426        | 0,27  | No  |
| ENSMUSG00000109267 | 1,03E-01  | 1,167540643  | 2,66E-01 | 6,06E-01 | 8,49E-01 | Gm45048       | 1,07  | No  |
| ENSMUSG00000109268 | -5,62E-01 | 0,616207253  | 5,75E+00 | 1,65E-02 | 1,34E-01 | 9530078K11Rik | 0,68  | No  |
| ENSMUSG00000109270 | -1,08E+00 | -2,26809723  | 1,86E+00 | 1,72E-01 | 5,29E-01 | Gm10584       | 0,47  | No  |
| ENSMUSG00000109274 | -1,79E-01 | 2,866515393  | 2,44E+00 | 1,18E-01 | 4,28E-01 | Gm45133       | 0,88  | No  |
| ENSMUSG00000109275 | 2,64E+00  | -3,033673223 | 2,69E+00 | 1,01E-01 | 3,92E-01 | Gm19182       | 6,23  | No  |
| ENSMUSG00000109277 | -9,56E-01 | -2,226148538 | 1,68E+00 | 1,95E-01 | 5,50E-01 | Gm39121       | 0,52  | No  |
| ENSMUSG00000109279 | 4,10E-02  | 2,93256143   | 1,29E-01 | 7,19E-01 | 9,15E-01 | Gm45220       | 1,03  | No  |
| ENSMUSG00000109282 | -4,59E-01 | 2,571364456  | 1,33E+01 | 2,64E-04 | 5,48E-03 | Gm45188       | 0,73  | Yes |
| ENSMUSG00000109290 | 3,49E+00  | -2,600766472 | 5,29E+00 | 2,15E-02 | 1,58E-01 | Phgdh-ps1     | 11,23 | No  |
| ENSMUSG00000109291 | 6,86E-02  | -2,289436859 | 6,78E-03 | 9,34E-01 | 1,00E+00 | Gm2814        | 1,05  | No  |
| ENSMUSG00000109293 | 4,74E-01  | -0,980490303 | 1,26E+00 | 2,61E-01 | 5,55E-01 | Dcst2         | 1,39  | No  |
| ENSMUSG00000109295 | 1,41E-01  | 1,832226653  | 7,81E-01 | 3,77E-01 | 6,78E-01 | Gm5739        | 1,10  | No  |
| ENSMUSG00000109297 | 3,80E-01  | -2,740902539 | 7,30E-02 | 7,87E-01 | 9,53E-01 | Gm31522       | 1,30  | No  |
| ENSMUSG00000109302 | -2,27E+00 | -2,548158671 | 4,20E+00 | 4,05E-02 | 2,38E-01 | Gm44967       | 0,21  | No  |

|                    |           |              |           |          |          |               |      |    |
|--------------------|-----------|--------------|-----------|----------|----------|---------------|------|----|
| ENSMUSG00000109303 | -6,19E-02 | -2,35550879  | 3,50E-03  | 9,53E-01 | 1,00E+00 | Gm44549       | 0,96 | No |
| ENSMUSG00000109304 | -1,23E-01 | -1,236635715 | 5,77E-02  | 8,10E-01 | 9,66E-01 | Gm45112       | 0,92 | No |
| ENSMUSG00000109305 | -2,57E-01 | -0,366859878 | 6,03E-01  | 4,38E-01 | 7,30E-01 | 1810010D01Rik | 0,84 | No |
| ENSMUSG00000109307 | 3,78E-01  | -2,929280399 | 7,15E-02  | 7,89E-01 | 9,54E-01 | Gm44700       | 1,30 | No |
| ENSMUSG00000109310 | 3,57E-01  | -1,963298397 | 3,08E-01  | 5,79E-01 | 8,36E-01 | Gm44576       | 1,28 | No |
| ENSMUSG00000109314 | -1,21E+00 | -2,401351928 | 1,89E+00  | 1,69E-01 | 5,23E-01 | Gm44699       | 0,43 | No |
| ENSMUSG00000109317 | 1,70E-01  | -1,522626267 | 8,79E-02  | 7,67E-01 | 9,40E-01 | Gm45041       | 1,13 | No |
| ENSMUSG00000109323 | 4,47E-01  | -2,655134647 | 1,56E-01  | 6,93E-01 | 9,01E-01 | Gm44968       | 1,36 | No |
| ENSMUSG00000109324 | 1,88E-02  | 5,138294326  | 6,70E-02  | 7,96E-01 | 9,57E-01 | Prmt1         | 1,01 | No |
| ENSMUSG00000109325 | 1,87E+00  | -3,107639691 | 1,38E+00  | 2,40E-01 | 5,50E-01 | Krt8-ps       | 3,67 | No |
| ENSMUSG00000109326 | -7,95E-02 | 4,49530745   | 9,80E-01  | 3,22E-01 | 6,22E-01 | Gm9165        | 0,95 | No |
| ENSMUSG00000109327 | -3,34E-01 | -0,800969649 | 5,98E-01  | 4,39E-01 | 7,32E-01 | Gm44995       | 0,79 | No |
| ENSMUSG00000109329 | -8,36E-01 | -2,711679134 | 3,84E-01  | 5,35E-01 | 8,08E-01 | Gm33926       | 0,56 | No |
| ENSMUSG00000109332 | -1,04E-02 | -2,963271219 | -1,18E-10 | 1,00E+00 | 1,00E+00 | Gm44742       | 0,99 | No |
| ENSMUSG00000109333 | 3,14E-02  | -3,107617333 | -7,69E-10 | 1,00E+00 | 1,00E+00 | Gm30790       | 1,02 | No |
| ENSMUSG00000109336 | -4,36E-02 | 6,342760728  | 4,72E-01  | 4,92E-01 | 7,78E-01 | Samd4b        | 0,97 | No |
| ENSMUSG00000109337 | 1,03E-01  | -1,998015693 | 2,32E-02  | 8,79E-01 | 1,00E+00 | Gm45047       | 1,07 | No |
| ENSMUSG00000109341 | 3,54E-01  | -1,088783384 | 5,23E-01  | 4,70E-01 | 7,58E-01 | Gm30873       | 1,28 | No |
| ENSMUSG00000109342 | -1,91E+00 | -2,963238542 | 1,45E+00  | 2,29E-01 | 5,50E-01 | Gm32983       | 0,27 | No |
| ENSMUSG00000109350 | -6,29E-01 | 0,739781255  | 7,87E+00  | 5,02E-03 | 5,61E-02 | Gm44805       | 0,65 | No |
| ENSMUSG00000109351 | -1,70E+00 | -2,448655729 | 3,18E+00  | 7,45E-02 | 3,47E-01 | Gm44632       | 0,31 | No |
| ENSMUSG00000109355 | 1,11E-01  | 2,87665368   | 9,05E-01  | 3,41E-01 | 6,42E-01 | Gm4880        | 1,08 | No |
| ENSMUSG00000109356 | -1,06E-01 | -3,033634182 | 5,86E-03  | 9,39E-01 | 1,00E+00 | Gm45118       | 0,93 | No |
| ENSMUSG00000109357 | 9,85E-02  | 2,258980769  | 5,05E-01  | 4,77E-01 | 7,65E-01 | Gm45236       | 1,07 | No |
| ENSMUSG00000109362 | -4,69E-01 | -2,401403931 | 2,24E-01  | 6,36E-01 | 8,67E-01 | Gm44562       | 0,72 | No |
| ENSMUSG00000109363 | -5,16E-02 | -1,800908551 | 6,83E-03  | 9,34E-01 | 1,00E+00 | Gm44668       | 0,96 | No |
| ENSMUSG00000109366 | 4,24E-02  | -3,033592245 | -1,17E-09 | 1,00E+00 | 1,00E+00 | Gm44698       | 1,03 | No |
| ENSMUSG00000109367 | -1,02E+00 | -1,946168485 | 2,82E+00  | 9,33E-02 | 3,83E-01 | Gm18782       | 0,49 | No |
| ENSMUSG00000109369 | 3,69E-02  | -1,655242941 | 3,97E-03  | 9,50E-01 | 1,00E+00 | Vmn2r-ps88    | 1,03 | No |
| ENSMUSG00000109378 | -4,00E-02 | 5,059056152  | 3,01E-01  | 5,83E-01 | 8,38E-01 | U2af1l4       | 0,97 | No |
| ENSMUSG00000109379 | -2,36E-01 | -0,32219069  | 5,36E-01  | 4,64E-01 | 7,53E-01 | Gm44550       | 0,85 | No |
| ENSMUSG00000109383 | 4,92E-01  | -2,146167772 | 4,70E-01  | 4,93E-01 | 7,79E-01 | Gm36584       | 1,41 | No |

|                    |           |              |          |          |          |               |      |    |
|--------------------|-----------|--------------|----------|----------|----------|---------------|------|----|
| ENSMUSG00000109390 | -2,95E-01 | 2,328301727  | 4,66E+00 | 3,09E-02 | 2,03E-01 | Gm45718       | 0,82 | No |
| ENSMUSG00000109392 | -1,87E+00 | -3,107637761 | 1,39E+00 | 2,38E-01 | 5,50E-01 | Gm5737        | 0,27 | No |
| ENSMUSG00000109393 | 1,81E+00  | -3,10765737  | 1,28E+00 | 2,58E-01 | 5,50E-01 | Gm44936       | 3,49 | No |
| ENSMUSG00000109398 | 6,53E-01  | -2,424776467 | 5,47E-01 | 4,60E-01 | 7,49E-01 | Gm3854        | 1,57 | No |
| ENSMUSG00000109399 | -1,75E+00 | -1,816446168 | 4,77E+00 | 2,90E-02 | 1,94E-01 | Gm44982       | 0,30 | No |
| ENSMUSG00000109401 | -8,24E-01 | -2,896084407 | 3,72E-01 | 5,42E-01 | 8,12E-01 | Cpeb1os1      | 0,56 | No |
| ENSMUSG00000109404 | -7,58E-02 | -1,033697275 | 2,82E-02 | 8,67E-01 | 9,99E-01 | Gm19963       | 0,95 | No |
| ENSMUSG00000109408 | -1,80E-02 | 3,633951575  | 3,56E-02 | 8,50E-01 | 9,90E-01 | A930037H05Rik | 0,99 | No |
| ENSMUSG00000109409 | -3,04E-01 | -2,268084525 | 1,38E-01 | 7,10E-01 | 9,10E-01 | Gm9343        | 0,81 | No |
| ENSMUSG00000109417 | 2,62E+00  | -3,033654625 | 2,66E+00 | 1,03E-01 | 3,95E-01 | Gm44859       | 6,16 | No |
| ENSMUSG00000109420 | 7,23E-01  | -2,185719269 | 8,45E-01 | 3,58E-01 | 6,59E-01 | Gm44702       | 1,65 | No |
| ENSMUSG00000109421 | -1,90E+00 | -3,033647263 | 1,44E+00 | 2,30E-01 | 5,50E-01 | Gm44998       | 0,27 | No |
| ENSMUSG00000109424 | -9,29E-02 | -2,448644973 | 9,89E-03 | 9,21E-01 | 1,00E+00 | Gm44658       | 0,94 | No |
| ENSMUSG00000109427 | 1,20E+00  | -1,963249535 | 2,19E+00 | 1,39E-01 | 4,71E-01 | Gm45845       | 2,29 | No |
| ENSMUSG00000109428 | -4,21E-01 | -0,634310444 | 1,23E+00 | 2,67E-01 | 5,63E-01 | Gm45698       | 0,75 | No |
| ENSMUSG00000109429 | -1,12E-01 | 2,540516732  | 7,83E-01 | 3,76E-01 | 6,77E-01 | Gm45223       | 0,93 | No |
| ENSMUSG00000109432 | -2,70E+00 | -3,033614577 | 2,89E+00 | 8,93E-02 | 3,79E-01 | Gm44785       | 0,15 | No |
| ENSMUSG00000109434 | -1,89E+00 | -3,033648118 | 1,42E+00 | 2,33E-01 | 5,50E-01 | Gm44937       | 0,27 | No |
| ENSMUSG00000109435 | 1,80E+00  | -2,83204555  | 1,30E+00 | 2,54E-01 | 5,50E-01 | Gm7067        | 3,49 | No |
| ENSMUSG00000109438 | -1,03E+00 | -1,929252418 | 2,35E+00 | 1,26E-01 | 4,44E-01 | Gm45073       | 0,49 | No |
| ENSMUSG00000109441 | -2,34E+00 | -3,070170518 | 2,13E+00 | 1,44E-01 | 4,80E-01 | Gm44983       | 0,20 | No |
| ENSMUSG00000109445 | -9,73E-02 | 0,221825608  | 1,27E-01 | 7,22E-01 | 9,16E-01 | 4930560O18Rik | 0,93 | No |
| ENSMUSG00000109448 | 2,63E-01  | 1,731513412  | 2,61E+00 | 1,06E-01 | 3,99E-01 | Gm45224       | 1,20 | No |
| ENSMUSG00000109450 | 1,85E+00  | -3,107657832 | 1,35E+00 | 2,46E-01 | 5,50E-01 | Gm39043       | 3,61 | No |
| ENSMUSG00000109452 | 5,95E-01  | -2,311219223 | 3,95E-01 | 5,30E-01 | 8,05E-01 | Gm44530       | 1,51 | No |
| ENSMUSG00000109455 | 1,05E-01  | 1,785252292  | 4,49E-01 | 5,03E-01 | 7,88E-01 | Gm44710       | 1,08 | No |
| ENSMUSG00000109458 | 1,87E+00  | -3,107639691 | 1,38E+00 | 2,40E-01 | 5,50E-01 | Gm44889       | 3,67 | No |
| ENSMUSG00000109460 | -3,05E-01 | -2,107648677 | 1,40E-01 | 7,09E-01 | 9,09E-01 | Gm45591       | 0,81 | No |
| ENSMUSG00000109462 | -6,79E-01 | -1,548244555 | 1,59E+00 | 2,08E-01 | 5,50E-01 | Gm6334        | 0,62 | No |
| ENSMUSG00000109468 | -3,18E+00 | -2,963258684 | 4,26E+00 | 3,90E-02 | 2,34E-01 | Gm45185       | 0,11 | No |
| ENSMUSG00000109471 | 2,57E+00  | -3,0336723   | 2,56E+00 | 1,10E-01 | 4,06E-01 | Gm19127       | 5,96 | No |
| ENSMUSG00000109472 | -6,30E-02 | 4,741842741  | 6,67E-01 | 4,14E-01 | 7,09E-01 | Gm18943       | 0,96 | No |

|                    |           |              |           |          |          |               |      |    |
|--------------------|-----------|--------------|-----------|----------|----------|---------------|------|----|
| ENSMUSG00000109476 | 1,87E+00  | -2,831970932 | 1,35E+00  | 2,44E-01 | 5,50E-01 | Gm21034       | 3,65 | No |
| ENSMUSG00000109480 | -1,03E+00 | -2,600611876 | 1,29E+00  | 2,55E-01 | 5,50E-01 | Gm45042       | 0,49 | No |
| ENSMUSG00000109482 | 1,62E+00  | -2,655150881 | 1,81E+00  | 1,78E-01 | 5,39E-01 | Gm4756        | 3,08 | No |
| ENSMUSG00000109484 | -2,56E-01 | 2,015749187  | 3,01E+00  | 8,30E-02 | 3,70E-01 | Gm44870       | 0,84 | No |
| ENSMUSG00000109485 | 5,88E-01  | -0,216201142 | 3,15E+00  | 7,57E-02 | 3,50E-01 | Gm45016       | 1,50 | No |
| ENSMUSG00000109488 | 5,57E-02  | 6,106675552  | 7,40E-01  | 3,90E-01 | 6,90E-01 | Gm6828        | 1,04 | No |
| ENSMUSG00000109489 | -1,34E-01 | 1,925152537  | 7,90E-01  | 3,74E-01 | 6,75E-01 | Gm7451        | 0,91 | No |
| ENSMUSG00000109491 | -1,55E-01 | 5,925538935  | 5,54E+00  | 1,85E-02 | 1,44E-01 | Gm15396       | 0,90 | No |
| ENSMUSG00000109492 | -1,39E+00 | -2,896103981 | 1,22E+00  | 2,70E-01 | 5,66E-01 | Gm33882       | 0,38 | No |
| ENSMUSG00000109494 | -4,27E-01 | -2,185604946 | 3,80E-01  | 5,38E-01 | 8,09E-01 | Gm21033       | 0,74 | No |
| ENSMUSG00000109495 | 9,48E-02  | -1,785779771 | 2,99E-02  | 8,63E-01 | 9,97E-01 | AC162893.1    | 1,07 | No |
| ENSMUSG00000109498 | 1,66E-01  | 3,092742412  | 2,33E+00  | 1,27E-01 | 4,46E-01 | Gm45222       | 1,12 | No |
| ENSMUSG00000109501 | -4,48E-01 | -2,497607995 | 2,05E-01  | 6,51E-01 | 8,76E-01 | Gm14377       | 0,73 | No |
| ENSMUSG00000109502 | -7,54E-01 | -1,963226138 | 1,16E+00  | 2,81E-01 | 5,78E-01 | Gm18672       | 0,59 | No |
| ENSMUSG00000109508 | -8,42E-01 | -2,896161952 | 3,88E-01  | 5,33E-01 | 8,06E-01 | Gm44956       | 0,56 | No |
| ENSMUSG00000109509 | -1,13E-01 | 6,320134941  | 3,14E+00  | 7,62E-02 | 3,52E-01 | Rps12-ps4     | 0,92 | No |
| ENSMUSG00000109510 | 5,65E-02  | 1,964586895  | 1,37E-01  | 7,12E-01 | 9,11E-01 | Gm42417       | 1,04 | No |
| ENSMUSG00000109511 | -1,26E-02 | 6,794408638  | 4,21E-02  | 8,37E-01 | 9,82E-01 | Nup62         | 0,99 | No |
| ENSMUSG00000109513 | -2,17E-02 | -3,07016949  | 1,75E-04  | 9,89E-01 | 1,00E+00 | Gm44928       | 0,99 | No |
| ENSMUSG00000109523 | -1,53E-01 | -1,393435047 | 7,28E-02  | 7,87E-01 | 9,53E-01 | Gdf1          | 0,90 | No |
| ENSMUSG00000109525 | -5,02E-01 | -1,755493288 | 6,11E-01  | 4,34E-01 | 7,27E-01 | Gm19091       | 0,71 | No |
| ENSMUSG00000109536 | 2,88E-01  | 2,830099464  | 5,89E+00  | 1,53E-02 | 1,27E-01 | 9330162G02Rik | 1,22 | No |
| ENSMUSG00000109539 | -1,30E-02 | 3,196072613  | 1,42E-02  | 9,05E-01 | 1,00E+00 | Gm44667       | 0,99 | No |
| ENSMUSG00000109550 | -1,89E+00 | -3,1076441   | 1,42E+00  | 2,33E-01 | 5,50E-01 | Gm44892       | 0,27 | No |
| ENSMUSG00000109552 | 1,79E+00  | -3,033666867 | 1,28E+00  | 2,58E-01 | 5,50E-01 | Gm44531       | 3,46 | No |
| ENSMUSG00000109555 | -6,82E-02 | -2,770657091 | 3,15E-03  | 9,55E-01 | 1,00E+00 | Gm44891       | 0,95 | No |
| ENSMUSG00000109556 | 1,80E-01  | -1,355545182 | 1,32E-01  | 7,17E-01 | 9,13E-01 | Gm38843       | 1,13 | No |
| ENSMUSG00000109558 | 4,24E-02  | -3,033592245 | -1,17E-09 | 1,00E+00 | 1,00E+00 | Gm45100       | 1,03 | No |
| ENSMUSG00000109560 | -3,57E+00 | -2,770586695 | 5,72E+00  | 1,68E-02 | 1,35E-01 | Gm8463        | 0,08 | No |
| ENSMUSG00000109561 | 1,81E+00  | -3,10765737  | 1,28E+00  | 2,58E-01 | 5,50E-01 | Ankrd31       | 3,49 | No |
| ENSMUSG00000109563 | -1,89E+00 | -3,070168098 | 1,43E+00  | 2,33E-01 | 5,50E-01 | Gm44772       | 0,27 | No |
| ENSMUSG00000109565 | -2,29E-01 | 0,045619383  | 6,48E-01  | 4,21E-01 | 7,16E-01 | Gm6579        | 0,85 | No |

|                    |           |              |           |          |          |               |  |      |     |
|--------------------|-----------|--------------|-----------|----------|----------|---------------|--|------|-----|
| ENSMUSG00000109566 | 1,85E+00  | -3,107657832 | 1,35E+00  | 2,46E-01 | 5,50E-01 | Gm31401       |  | 3,61 | No  |
| ENSMUSG00000109568 | -1,76E+00 | -2,311137527 | 4,14E+00  | 4,19E-02 | 2,43E-01 | Gm45074       |  | 0,30 | No  |
| ENSMUSG00000109570 | 3,69E-01  | -0,714209125 | 9,20E-01  | 3,37E-01 | 6,38E-01 | Gm44624       |  | 1,29 | No  |
| ENSMUSG00000109576 | -4,09E-02 | -2,770646138 | 1,13E-03  | 9,73E-01 | 1,00E+00 | Gm44704       |  | 0,97 | No  |
| ENSMUSG00000109584 | 2,91E-01  | -1,711763864 | 2,45E-01  | 6,21E-01 | 8,57E-01 | Gm7997        |  | 1,22 | No  |
| ENSMUSG00000109585 | 1,54E-01  | -0,614074935 | 1,73E-01  | 6,77E-01 | 8,92E-01 | Gm45358       |  | 1,11 | No  |
| ENSMUSG00000109586 | -1,94E+00 | -3,107619243 | 1,50E+00  | 2,21E-01 | 5,50E-01 | Gm6853        |  | 0,26 | No  |
| ENSMUSG00000109587 | 3,33E-01  | -0,257645579 | 1,02E+00  | 3,13E-01 | 6,12E-01 | Gm31105       |  | 1,26 | No  |
| ENSMUSG00000109588 | 9,01E-03  | -3,107646452 | -5,16E-10 | 1,00E+00 | 1,00E+00 | Lnp1          |  | 1,01 | No  |
| ENSMUSG00000109589 | 1,47E-01  | -2,146045017 | 3,77E-02  | 8,46E-01 | 9,87E-01 | Gm45267       |  | 1,11 | No  |
| ENSMUSG00000109598 | -1,89E+00 | -3,1076441   | 1,42E+00  | 2,33E-01 | 5,50E-01 | Gm36356       |  | 0,27 | No  |
| ENSMUSG00000109599 | -7,63E-01 | 0,644602009  | 1,13E+01  | 7,61E-04 | 1,29E-02 | Gm31812       |  | 0,59 | Yes |
| ENSMUSG00000109600 | -2,73E+00 | -2,963241672 | 2,94E+00  | 8,62E-02 | 3,78E-01 | Gm18212       |  | 0,15 | No  |
| ENSMUSG00000109602 | -1,80E-01 | 0,445524292  | 4,86E-01  | 4,85E-01 | 7,73E-01 | Gm31597       |  | 0,88 | No  |
| ENSMUSG00000109608 | 8,08E-01  | -2,600684238 | 5,67E-01  | 4,51E-01 | 7,41E-01 | Gm45597       |  | 1,75 | No  |
| ENSMUSG00000109609 | 1,24E-01  | 4,484630359  | 2,37E+00  | 1,24E-01 | 4,40E-01 | Gm4972        |  | 1,09 | No  |
| ENSMUSG00000109610 | 7,16E-02  | 5,87735142   | 1,17E+00  | 2,80E-01 | 5,77E-01 | Gm7432        |  | 1,05 | No  |
| ENSMUSG00000109612 | -1,94E+00 | -3,107619243 | 1,50E+00  | 2,21E-01 | 5,50E-01 | Gm45253       |  | 0,26 | No  |
| ENSMUSG00000109613 | -5,41E-01 | -2,185641565 | 4,69E-01  | 4,93E-01 | 7,79E-01 | Gm45405       |  | 0,69 | No  |
| ENSMUSG00000109614 | -3,83E-02 | -3,107651936 | -7,91E-11 | 1,00E+00 | 1,00E+00 | Gm45252       |  | 0,97 | No  |
| ENSMUSG00000109617 | -1,96E+00 | -2,963249504 | 1,50E+00  | 2,21E-01 | 5,50E-01 | Gm7669        |  | 0,26 | No  |
| ENSMUSG00000109618 | -7,71E-02 | -0,683121952 | 4,16E-02  | 8,38E-01 | 9,82E-01 | Gm45527       |  | 0,95 | No  |
| ENSMUSG00000109628 | -2,74E+00 | -3,033596063 | 2,99E+00  | 8,38E-02 | 3,71E-01 | BC024386      |  | 0,15 | No  |
| ENSMUSG00000109632 | 4,45E-01  | -1,711724627 | 5,46E-01  | 4,60E-01 | 7,49E-01 | Gm31479       |  | 1,36 | No  |
| ENSMUSG00000109634 | 1,25E+00  | -2,65513785  | 9,62E-01  | 3,27E-01 | 6,27E-01 | Gm45474       |  | 2,37 | No  |
| ENSMUSG00000109635 | 6,94E-01  | -2,963285211 | 2,59E-01  | 6,11E-01 | 8,52E-01 | Gm45670       |  | 1,62 | No  |
| ENSMUSG00000109636 | 7,88E-01  | -1,997965631 | 1,32E+00  | 2,51E-01 | 5,50E-01 | Gm45644       |  | 1,73 | No  |
| ENSMUSG00000109638 | -1,32E-01 | -1,088855431 | 8,36E-02  | 7,72E-01 | 9,43E-01 | Gm45630       |  | 0,91 | No  |
| ENSMUSG00000109640 | 5,59E-02  | -1,801027496 | 8,38E-03  | 9,27E-01 | 1,00E+00 | Gm45413       |  | 1,04 | No  |
| ENSMUSG00000109642 | -2,71E+00 | -2,77058678  | 2,91E+00  | 8,82E-02 | 3,79E-01 | Gm45289       |  | 0,15 | No  |
| ENSMUSG00000109644 | -5,80E-01 | -0,748078747 | 2,47E+00  | 1,16E-01 | 4,21E-01 | 0610005C13Rik |  | 0,67 | No  |
| ENSMUSG00000109645 | -4,25E-02 | 3,530244932  | 1,84E-01  | 6,68E-01 | 8,87E-01 | Gm45246       |  | 0,97 | No  |



|                    |           |              |           |          |          |          |  |      |    |
|--------------------|-----------|--------------|-----------|----------|----------|----------|--|------|----|
| ENSMUSG00000109647 | 1,20E-01  | -0,395444496 | 1,25E-01  | 7,24E-01 | 9,17E-01 | Gm45510  |  | 1,09 | No |
| ENSMUSG00000109651 | 9,01E-03  | -3,107646452 | -5,16E-10 | 1,00E+00 | 1,00E+00 | Gm45463  |  | 1,01 | No |
| ENSMUSG00000109652 | 1,28E-01  | -1,52266765  | 5,77E-02  | 8,10E-01 | 9,66E-01 | Gm45555  |  | 1,09 | No |
| ENSMUSG00000109654 | -1,24E+00 | -2,08879264  | 2,55E+00  | 1,10E-01 | 4,07E-01 | Gm3912   |  | 0,42 | No |
| ENSMUSG00000109656 | -3,13E-01 | -2,070194985 | 1,47E-01  | 7,02E-01 | 9,05E-01 | Gm45548  |  | 0,80 | No |
| ENSMUSG00000109658 | -1,94E-01 | 4,306719213  | 5,57E+00  | 1,83E-02 | 1,42E-01 | Gm45660  |  | 0,87 | No |
| ENSMUSG00000109667 | 1,82E+00  | -3,033667329 | 1,31E+00  | 2,52E-01 | 5,50E-01 | Gm36231  |  | 3,54 | No |
| ENSMUSG00000109669 | -2,28E-01 | 2,32380566   | 2,78E+00  | 9,57E-02 | 3,86E-01 | Gm45472  |  | 0,85 | No |
| ENSMUSG00000109673 | -1,74E+00 | -2,770567777 | 2,11E+00  | 1,46E-01 | 4,84E-01 | Gm9712   |  | 0,30 | No |
| ENSMUSG00000109675 | 1,34E-01  | 1,364761528  | 5,53E-01  | 4,57E-01 | 7,46E-01 | Nxpe1-ps |  | 1,10 | No |
| ENSMUSG00000109676 | -8,20E-02 | -2,770626326 | 4,55E-03  | 9,46E-01 | 1,00E+00 | Gm8913   |  | 0,94 | No |
| ENSMUSG00000109677 | -3,83E-02 | -3,107651936 | -7,91E-11 | 1,00E+00 | 1,00E+00 | Gm45514  |  | 0,97 | No |
| ENSMUSG00000109679 | -3,21E-01 | 0,028209301  | 1,14E+00  | 2,86E-01 | 5,82E-01 | Gm45342  |  | 0,80 | No |
| ENSMUSG00000109680 | 5,04E-01  | -0,472994044 | 1,80E+00  | 1,80E-01 | 5,42E-01 | Gm32098  |  | 1,42 | No |
| ENSMUSG00000109684 | -5,12E-01 | -1,522604619 | 8,48E-01  | 3,57E-01 | 6,58E-01 | Gm45745  |  | 0,70 | No |
| ENSMUSG00000109685 | -8,02E-02 | -2,497606631 | 7,39E-03  | 9,32E-01 | 1,00E+00 | Gm45912  |  | 0,95 | No |
| ENSMUSG00000109689 | -1,26E+00 | -2,600621822 | 1,51E+00  | 2,18E-01 | 5,50E-01 | Gm45646  |  | 0,42 | No |
| ENSMUSG00000109690 | 1,04E-02  | 0,794123702  | 2,04E-03  | 9,64E-01 | 1,00E+00 | Gm6376   |  | 1,01 | No |
| ENSMUSG00000109693 | -9,88E-01 | -2,770597192 | 8,59E-01  | 3,54E-01 | 6,55E-01 | Gm45483  |  | 0,50 | No |
| ENSMUSG00000109695 | -2,92E-03 | -0,607336332 | 6,30E-05  | 9,94E-01 | 1,00E+00 | Gm31166  |  | 1,00 | No |
| ENSMUSG00000109698 | 1,78E+00  | -2,963287612 | 1,28E+00  | 2,58E-01 | 5,50E-01 | Gm45469  |  | 3,44 | No |
| ENSMUSG00000109700 | -1,87E+00 | -3,03364178  | 1,41E+00  | 2,36E-01 | 5,50E-01 | Gm21123  |  | 0,27 | No |
| ENSMUSG00000109702 | 1,85E+00  | -3,107657832 | 1,35E+00  | 2,46E-01 | 5,50E-01 | Gm45674  |  | 3,61 | No |
| ENSMUSG00000109704 | 1,22E+00  | -2,770599169 | 9,27E-01  | 3,36E-01 | 6,37E-01 | Gm38414  |  | 2,33 | No |
| ENSMUSG00000109707 | -1,84E-01 | -1,401359793 | 9,92E-02  | 7,53E-01 | 9,33E-01 | Gm4270   |  | 0,88 | No |
| ENSMUSG00000109708 | -7,78E-01 | -1,079557767 | 2,79E+00  | 9,50E-02 | 3,86E-01 | Gm45809  |  | 0,58 | No |
| ENSMUSG00000109709 | 3,03E-01  | -2,355590712 | 9,34E-02  | 7,60E-01 | 9,37E-01 | Gm45290  |  | 1,23 | No |
| ENSMUSG00000109710 | 1,24E+00  | -2,711699884 | 9,60E-01  | 3,27E-01 | 6,28E-01 | Gm4974   |  | 2,37 | No |
| ENSMUSG00000109711 | 5,56E-02  | -0,311207918 | 2,55E-02  | 8,73E-01 | 1,00E+00 | Gm45445  |  | 1,04 | No |
| ENSMUSG00000109712 | -1,47E+00 | -2,497491302 | 2,24E+00  | 1,34E-01 | 4,61E-01 | Gm8667   |  | 0,36 | No |
| ENSMUSG00000109713 | -9,11E-01 | -1,711726225 | 2,05E+00  | 1,53E-01 | 4,95E-01 | Pvrig    |  | 0,53 | No |
| ENSMUSG00000109714 | -1,49E+00 | -2,497536861 | 2,31E+00  | 1,29E-01 | 4,50E-01 | Gm35021  |  | 0,35 | No |

|                    |           |              |           |          |          |               |      |    |
|--------------------|-----------|--------------|-----------|----------|----------|---------------|------|----|
| ENSMUSG00000109715 | 1,78E-01  | 3,628780277  | 3,33E+00  | 6,80E-02 | 3,28E-01 | Gm45606       | 1,13 | No |
| ENSMUSG00000109717 | -9,53E-01 | -2,655133799 | 9,46E-01  | 3,31E-01 | 6,31E-01 | Gm34368       | 0,52 | No |
| ENSMUSG00000109719 | -4,72E-01 | -1,015598988 | 1,14E+00  | 2,86E-01 | 5,82E-01 | Gm45266       | 0,72 | No |
| ENSMUSG00000109721 | 2,66E+00  | -2,963252223 | 2,74E+00  | 9,80E-02 | 3,91E-01 | Gm45280       | 6,34 | No |
| ENSMUSG00000109724 | -4,60E-02 | 2,198764389  | 1,02E-01  | 7,49E-01 | 9,31E-01 | Gm18194       | 0,97 | No |
| ENSMUSG00000109727 | -6,55E-02 | 2,602774773  | 2,76E-01  | 6,00E-01 | 8,46E-01 | Gm45464       | 0,96 | No |
| ENSMUSG00000109728 | -8,97E-02 | -2,107616941 | 1,49E-02  | 9,03E-01 | 1,00E+00 | Gm45359       | 0,94 | No |
| ENSMUSG00000109729 | -7,18E-01 | -3,070161557 | 2,09E-01  | 6,48E-01 | 8,75E-01 | Gm45418       | 0,61 | No |
| ENSMUSG00000109731 | 1,27E+00  | -2,711723554 | 9,97E-01  | 3,18E-01 | 6,19E-01 | Gm45425       | 2,41 | No |
| ENSMUSG00000109732 | 6,95E-01  | -2,963260828 | 2,60E-01  | 6,10E-01 | 8,51E-01 | Gm45285       | 1,62 | No |
| ENSMUSG00000109733 | 4,04E-01  | -2,963255792 | 8,20E-02  | 7,75E-01 | 9,45E-01 | Gm33940       | 1,32 | No |
| ENSMUSG00000109735 | 1,85E+00  | -3,070170636 | 1,34E+00  | 2,48E-01 | 5,50E-01 | Gm45667       | 3,59 | No |
| ENSMUSG00000109737 | -5,23E-02 | -2,963267963 | 1,24E-03  | 9,72E-01 | 1,00E+00 | Gm39566       | 0,96 | No |
| ENSMUSG00000109739 | -9,12E-02 | -0,200902543 | 8,14E-02  | 7,75E-01 | 9,45E-01 | Gm17949       | 0,94 | No |
| ENSMUSG00000109740 | 2,18E-01  | -0,460760991 | 3,40E-01  | 5,60E-01 | 8,23E-01 | Gm7561        | 1,16 | No |
| ENSMUSG00000109750 | -5,89E-01 | -2,600724146 | 2,72E-01  | 6,02E-01 | 8,48E-01 | Hmgb1-rs17    | 0,66 | No |
| ENSMUSG00000109751 | -4,72E-01 | -1,683077268 | 5,93E-01  | 4,41E-01 | 7,34E-01 | Gm45479       | 0,72 | No |
| ENSMUSG00000109754 | -3,77E-02 | 2,016228673  | 6,27E-02  | 8,02E-01 | 9,61E-01 | Gm39214       | 0,97 | No |
| ENSMUSG00000109756 | 1,87E+00  | -3,107639691 | 1,38E+00  | 2,40E-01 | 5,50E-01 | Gm5339        | 3,67 | No |
| ENSMUSG00000109757 | -1,38E-01 | 1,152333158  | 4,83E-01  | 4,87E-01 | 7,74E-01 | Gm7128        | 0,91 | No |
| ENSMUSG00000109759 | 4,23E-01  | -2,711682905 | 1,40E-01  | 7,09E-01 | 9,09E-01 | 1700011L03Rik | 1,34 | No |
| ENSMUSG00000109760 | 8,50E-02  | -1,126709983 | 3,37E-02  | 8,54E-01 | 9,92E-01 | Gm6503        | 1,06 | No |
| ENSMUSG00000109764 | 4,95E-01  | -1,801024686 | 6,16E-01  | 4,33E-01 | 7,26E-01 | Klkb1         | 1,41 | No |
| ENSMUSG00000109765 | 3,07E-01  | -2,401386411 | 9,60E-02  | 7,57E-01 | 9,35E-01 | Gm18227       | 1,24 | No |
| ENSMUSG00000109766 | -2,49E-02 | -3,146121042 | -4,44E-11 | 1,00E+00 | 1,00E+00 | Gm45415       | 0,98 | No |
| ENSMUSG00000109768 | -3,83E-02 | -3,107651936 | -7,91E-11 | 1,00E+00 | 1,00E+00 | Gm45446       | 0,97 | No |
| ENSMUSG00000109769 | 3,14E-02  | -3,107617333 | -7,69E-10 | 1,00E+00 | 1,00E+00 | Gm39232       | 1,02 | No |
| ENSMUSG00000109771 | 3,36E-01  | -1,25753752  | 4,38E-01  | 5,08E-01 | 7,92E-01 | Gm35315       | 1,26 | No |
| ENSMUSG00000109780 | 3,12E+00  | -2,77060898  | 3,97E+00  | 4,62E-02 | 2,57E-01 | Gm45447       | 8,69 | No |
| ENSMUSG00000109781 | 3,09E-01  | -0,333110754 | 8,33E-01  | 3,62E-01 | 6,63E-01 | Gm45509       | 1,24 | No |
| ENSMUSG00000109782 | -1,78E+00 | -2,268109167 | 4,23E+00  | 3,96E-02 | 2,36E-01 | Gm45728       | 0,29 | No |
| ENSMUSG00000109783 | 6,51E-01  | -2,548155804 | 3,51E-01  | 5,54E-01 | 8,19E-01 | Gm45338       | 1,57 | No |

|                    |           |              |           |          |          |               |       |     |
|--------------------|-----------|--------------|-----------|----------|----------|---------------|-------|-----|
| ENSMUSG00000109784 | -7,34E-02 | -0,485189349 | 4,75E-02  | 8,27E-01 | 9,76E-01 | Gm45493       | 0,95  | No  |
| ENSMUSG00000109785 | -1,74E-01 | -2,051781455 | 5,10E-02  | 8,21E-01 | 9,72E-01 | Gm45542       | 0,89  | No  |
| ENSMUSG00000109786 | 2,67E+00  | -3,033636951 | 2,76E+00  | 9,68E-02 | 3,88E-01 | Gm7839        | 6,36  | No  |
| ENSMUSG00000109787 | 1,39E-01  | 0,627326377  | 3,39E-01  | 5,61E-01 | 8,24E-01 | Gm45286       | 1,10  | No  |
| ENSMUSG00000109790 | 3,48E+00  | -2,832062297 | 5,25E+00  | 2,19E-02 | 1,60E-01 | Gm45594       | 11,16 | No  |
| ENSMUSG00000109793 | 2,73E-02  | 2,494794209  | 4,45E-02  | 8,33E-01 | 9,78E-01 | Gm10043       | 1,02  | No  |
| ENSMUSG00000109795 | -3,83E-02 | -3,107651936 | -7,91E-11 | 1,00E+00 | 1,00E+00 | Gm45522       | 0,97  | No  |
| ENSMUSG00000109799 | -1,39E-01 | 3,927526643  | 2,44E+00  | 1,18E-01 | 4,27E-01 | Gm45515       | 0,91  | No  |
| ENSMUSG00000109800 | 1,84E-01  | 0,672295757  | 6,08E-01  | 4,35E-01 | 7,28E-01 | Gm5130        | 1,14  | No  |
| ENSMUSG00000109806 | -1,89E+00 | -3,1076441   | 1,42E+00  | 2,33E-01 | 5,50E-01 | Olfr663       | 0,27  | No  |
| ENSMUSG00000109807 | -4,41E-02 | 0,327570417  | 2,69E-02  | 8,70E-01 | 1,00E+00 | Gm45244       | 0,97  | No  |
| ENSMUSG00000109810 | 2,67E+00  | -3,033636951 | 2,76E+00  | 9,68E-02 | 3,88E-01 | Gm45592       | 6,36  | No  |
| ENSMUSG00000109811 | -5,89E-02 | -2,896081659 | 1,55E-03  | 9,69E-01 | 1,00E+00 | Tpt1-ps4      | 0,96  | No  |
| ENSMUSG00000109812 | 2,96E-01  | 0,691650256  | 1,67E+00  | 1,96E-01 | 5,50E-01 | Gm45640       | 1,23  | No  |
| ENSMUSG00000109813 | -1,94E+00 | -3,107619243 | 1,50E+00  | 2,21E-01 | 5,50E-01 | Olfr1279      | 0,26  | No  |
| ENSMUSG00000109814 | -5,14E-01 | -0,912385304 | 1,33E+00  | 2,49E-01 | 5,50E-01 | Gm45847       | 0,70  | No  |
| ENSMUSG00000109816 | 1,87E+00  | -3,107639691 | 1,38E+00  | 2,40E-01 | 5,50E-01 | 4930483008Rik | 3,67  | No  |
| ENSMUSG00000109819 | -5,51E-02 | -2,832041634 | 2,04E-03  | 9,64E-01 | 1,00E+00 | B930018H19Rik | 0,96  | No  |
| ENSMUSG00000109821 | 2,76E-01  | 2,988122345  | 5,79E+00  | 1,61E-02 | 1,32E-01 | Gm6593        | 1,21  | No  |
| ENSMUSG00000109822 | -3,72E-01 | -0,442398403 | 9,61E-01  | 3,27E-01 | 6,28E-01 | Gm8556        | 0,77  | No  |
| ENSMUSG00000109825 | -1,87E+00 | -3,033619006 | 1,41E+00  | 2,36E-01 | 5,50E-01 | Gm45589       | 0,27  | No  |
| ENSMUSG00000109828 | 2,87E+00  | -2,226338184 | 8,19E+00  | 4,21E-03 | 4,91E-02 | Gm45662       | 7,32  | Yes |
| ENSMUSG00000109829 | -6,94E-01 | -1,126567205 | 2,65E+00  | 1,04E-01 | 3,96E-01 | Gm45605       | 0,62  | No  |
| ENSMUSG00000109830 | -2,05E-01 | 0,47777839   | 6,93E-01  | 4,05E-01 | 7,02E-01 | Gm7965        | 0,87  | No  |
| ENSMUSG00000109836 | 7,16E-02  | 1,791683028  | 2,17E-01  | 6,42E-01 | 8,71E-01 | Gm45884       | 1,05  | No  |
| ENSMUSG00000109842 | -1,89E+00 | -3,033648118 | 1,42E+00  | 2,33E-01 | 5,50E-01 | Gm45502       | 0,27  | No  |
| ENSMUSG00000109843 | -1,89E+00 | -3,1076441   | 1,42E+00  | 2,33E-01 | 5,50E-01 | Gm17841       | 0,27  | No  |
| ENSMUSG00000109846 | -1,72E+00 | -2,711680283 | 2,06E+00  | 1,52E-01 | 4,93E-01 | Gm45627       | 0,30  | No  |
| ENSMUSG00000109847 | -7,04E-01 | -2,963208798 | 1,99E-01  | 6,56E-01 | 8,80E-01 | Gm45278       | 0,61  | No  |
| ENSMUSG00000109850 | -6,92E-01 | -0,338657678 | 4,20E+00  | 4,05E-02 | 2,38E-01 | Gm45692       | 0,62  | No  |
| ENSMUSG00000109852 | 6,11E-01  | -1,126853428 | 1,86E+00  | 1,72E-01 | 5,29E-01 | Gm45360       | 1,53  | No  |
| ENSMUSG00000109853 | -2,67E+00 | -2,99799084  | 2,84E+00  | 9,21E-02 | 3,82E-01 | Gm33045       | 0,16  | No  |

|                    |           |              |          |          |          |               |      |     |
|--------------------|-----------|--------------|----------|----------|----------|---------------|------|-----|
| ENSMUSG00000109854 | -5,78E-01 | -1,711622014 | 9,22E-01 | 3,37E-01 | 6,38E-01 | Gm45345       | 0,67 | No  |
| ENSMUSG00000109855 | 5,84E-01  | -3,033660209 | 1,35E-01 | 7,13E-01 | 9,11E-01 | Gm45613       | 1,50 | No  |
| ENSMUSG00000109857 | -5,71E-01 | -1,448738937 | 1,36E+00 | 2,44E-01 | 5,50E-01 | Gm32817       | 0,67 | No  |
| ENSMUSG00000109861 | 2,69E-01  | -1,401517478 | 2,26E-01 | 6,35E-01 | 8,66E-01 | 4930458B22Rik | 1,20 | No  |
| ENSMUSG00000109863 | 7,05E-01  | -2,963278876 | 2,69E-01 | 6,04E-01 | 8,49E-01 | Gm45643       | 1,63 | No  |
| ENSMUSG00000109864 | -5,66E-01 | 3,081447045  | 2,24E+01 | 2,16E-06 | 8,69E-05 | Eid3          | 0,68 | Yes |
| ENSMUSG00000109865 | 3,19E-02  | 5,583838366  | 2,17E-01 | 6,42E-01 | 8,71E-01 | Hspa14        | 1,02 | No  |
| ENSMUSG00000109870 | -2,71E+00 | -3,033620915 | 2,92E+00 | 8,75E-02 | 3,78E-01 | Gm35850       | 0,15 | No  |
| ENSMUSG00000109872 | 1,85E+00  | -3,107657832 | 1,35E+00 | 2,46E-01 | 5,50E-01 | Gm45312       | 3,61 | No  |
| ENSMUSG00000109873 | 5,99E-02  | -0,69724112  | 2,17E-02 | 8,83E-01 | 1,00E+00 | Gm45407       | 1,04 | No  |
| ENSMUSG00000109875 | -1,50E-01 | 4,798488008  | 3,85E+00 | 4,97E-02 | 2,69E-01 | Gm45456       | 0,90 | No  |
| ENSMUSG00000109876 | 3,79E-01  | 1,355527042  | 4,11E+00 | 4,27E-02 | 2,46E-01 | Gm45449       | 1,30 | No  |
| ENSMUSG00000109877 | 5,74E-01  | -2,929320941 | 1,33E-01 | 7,15E-01 | 9,13E-01 | Gm45609       | 1,49 | No  |
| ENSMUSG00000109879 | -1,23E+00 | -2,448571052 | 1,45E+00 | 2,29E-01 | 5,50E-01 | Gm10997       | 0,43 | No  |
| ENSMUSG00000109881 | 4,08E-01  | 2,499797817  | 9,15E+00 | 2,48E-03 | 3,32E-02 | Gm45507       | 1,33 | Yes |
| ENSMUSG00000109889 | 1,48E-01  | 1,568812311  | 7,33E-01 | 3,92E-01 | 6,92E-01 | Gm3774        | 1,11 | No  |
| ENSMUSG00000109893 | 1,81E-01  | -2,226311166 | 4,89E-02 | 8,25E-01 | 9,74E-01 | Gm9655        | 1,13 | No  |
| ENSMUSG00000109894 | 8,03E-02  | 5,008042406  | 1,17E+00 | 2,79E-01 | 5,76E-01 | Gm5904        | 1,06 | No  |
| ENSMUSG00000109897 | 1,73E-02  | 2,005969924  | 1,21E-02 | 9,12E-01 | 1,00E+00 | Gm6458        | 1,01 | No  |
| ENSMUSG00000109898 | 1,85E+00  | -3,107657832 | 1,35E+00 | 2,46E-01 | 5,50E-01 | 6330420H09Rik | 3,61 | No  |
| ENSMUSG00000109899 | 2,43E-01  | 0,087507906  | 6,83E-01 | 4,08E-01 | 7,05E-01 | Gm6012        | 1,18 | No  |
| ENSMUSG00000109901 | 2,71E-02  | 6,339684714  | 1,81E-01 | 6,70E-01 | 8,88E-01 | Chmp1b        | 1,02 | No  |
| ENSMUSG00000109902 | 1,83E+00  | -2,963282593 | 1,33E+00 | 2,50E-01 | 5,50E-01 | Gm45693       | 3,56 | No  |
| ENSMUSG00000109904 | 1,98E-01  | 0,095723265  | 4,85E-01 | 4,86E-01 | 7,73E-01 | Gm45819       | 1,15 | No  |
| ENSMUSG00000109905 | -3,26E-01 | 0,80455254   | 2,08E+00 | 1,49E-01 | 4,90E-01 | Gm7380        | 0,80 | No  |
| ENSMUSG00000109909 | 1,03E+00  | -2,185691198 | 1,71E+00 | 1,92E-01 | 5,50E-01 | Gm45663       | 2,04 | No  |
| ENSMUSG00000109910 | -1,13E+00 | -1,963115176 | 2,09E+00 | 1,48E-01 | 4,87E-01 | Gm45240       | 0,46 | No  |
| ENSMUSG00000109913 | 8,33E-01  | -2,711725316 | 6,05E-01 | 4,37E-01 | 7,29E-01 | Gm30694       | 1,78 | No  |
| ENSMUSG00000109917 | -1,94E+00 | -3,107619243 | 1,50E+00 | 2,21E-01 | 5,50E-01 | Gm45671       | 0,26 | No  |
| ENSMUSG00000109923 | -1,28E+00 | -3,10763559  | 7,49E-01 | 3,87E-01 | 6,87E-01 | Gm20039       | 0,41 | No  |
| ENSMUSG00000109925 | 7,73E-02  | 1,081253895  | 1,42E-01 | 7,07E-01 | 9,08E-01 | Gm45315       | 1,06 | No  |
| ENSMUSG00000109926 | 4,05E-02  | 4,484001138  | 2,49E-01 | 6,18E-01 | 8,55E-01 | Gm45808       | 1,03 | No  |

|                    |           |              |           |          |          |               |  |      |     |
|--------------------|-----------|--------------|-----------|----------|----------|---------------|--|------|-----|
| ENSMUSG00000109931 | 1,92E+00  | -2,655195945 | 2,75E+00  | 9,71E-02 | 3,89E-01 | Gm39929       |  | 3,79 | No  |
| ENSMUSG00000109933 | -1,21E-01 | 6,632823577  | 3,83E+00  | 5,02E-02 | 2,72E-01 | Gm7600        |  | 0,92 | No  |
| ENSMUSG00000109936 | -7,39E-01 | -2,401307806 | 6,12E-01  | 4,34E-01 | 7,27E-01 | Gm45889       |  | 0,60 | No  |
| ENSMUSG00000109938 | 5,12E-01  | -0,683122006 | 1,86E+00  | 1,73E-01 | 5,30E-01 | Gm6009        |  | 1,43 | No  |
| ENSMUSG00000109940 | 9,77E-02  | -0,535551331 | 7,19E-02  | 7,89E-01 | 9,54E-01 | Gm45399       |  | 1,07 | No  |
| ENSMUSG00000109941 | 1,55E-01  | 3,094481202  | 2,00E+00  | 1,57E-01 | 5,03E-01 | Exosc6        |  | 1,11 | No  |
| ENSMUSG00000109946 | 9,36E-02  | -0,697367918 | 5,41E-02  | 8,16E-01 | 9,69E-01 | D2Bwg1423e    |  | 1,07 | No  |
| ENSMUSG00000109947 | -3,47E-01 | -1,205769275 | 5,42E-01  | 4,62E-01 | 7,50E-01 | Gm45669       |  | 0,79 | No  |
| ENSMUSG00000109953 | 5,22E-01  | 0,1198448    | 3,21E+00  | 7,32E-02 | 3,44E-01 | 5430430B14Rik |  | 1,44 | No  |
| ENSMUSG00000109954 | 2,71E-01  | 4,863180639  | 1,23E+01  | 4,48E-04 | 8,39E-03 | Gm45371       |  | 1,21 | Yes |
| ENSMUSG00000109955 | -1,94E+00 | -3,107619243 | 1,50E+00  | 2,21E-01 | 5,50E-01 | Gm18644       |  | 0,26 | No  |
| ENSMUSG00000109956 | -2,04E-01 | -1,740896161 | 1,12E-01  | 7,38E-01 | 9,26E-01 | Gm45428       |  | 0,87 | No  |
| ENSMUSG00000109957 | 7,24E-01  | -2,896151689 | 2,85E-01  | 5,93E-01 | 8,43E-01 | Gm45353       |  | 1,65 | No  |
| ENSMUSG00000109959 | 5,38E-01  | -0,971882905 | 1,49E+00  | 2,23E-01 | 5,50E-01 | Gm45355       |  | 1,45 | No  |
| ENSMUSG00000109961 | -3,83E-02 | -3,107651936 | -7,91E-11 | 1,00E+00 | 1,00E+00 | Gm31983       |  | 0,97 | No  |
| ENSMUSG00000109967 | -1,55E-01 | 1,263802297  | 6,74E-01  | 4,12E-01 | 7,07E-01 | Gm45883       |  | 0,90 | No  |
| ENSMUSG00000109970 | -3,20E+00 | -2,655110083 | 4,32E+00  | 3,76E-02 | 2,30E-01 | Gm17995       |  | 0,11 | No  |
| ENSMUSG00000109975 | 7,18E-03  | -1,185692817 | 2,23E-04  | 9,88E-01 | 1,00E+00 | Gm19196       |  | 1,00 | No  |
| ENSMUSG00000109979 | -2,51E-01 | -2,107670493 | 1,24E-01  | 7,25E-01 | 9,18E-01 | Gm45596       |  | 0,84 | No  |
| ENSMUSG00000109980 | 7,31E-01  | -2,963267542 | 2,91E-01  | 5,90E-01 | 8,41E-01 | Gm45538       |  | 1,66 | No  |
| ENSMUSG00000109982 | -9,47E-01 | -2,655159443 | 7,86E-01  | 3,75E-01 | 6,76E-01 | Gm45520       |  | 0,52 | No  |
| ENSMUSG00000109984 | 9,66E-02  | 0,348422598  | 1,44E-01  | 7,04E-01 | 9,06E-01 | Gm38948       |  | 1,07 | No  |
| ENSMUSG00000109993 | 1,81E+00  | -3,10765737  | 1,28E+00  | 2,58E-01 | 5,50E-01 | Gm45659       |  | 3,49 | No  |
| ENSMUSG00000109998 | 1,10E-01  | -2,574222629 | 1,32E-02  | 9,09E-01 | 1,00E+00 | Gm45437       |  | 1,08 | No  |
| ENSMUSG00000110001 | -3,59E+00 | -2,655105661 | 5,80E+00  | 1,60E-02 | 1,32E-01 | C86187        |  | 0,08 | No  |
| ENSMUSG00000110003 | 4,38E-01  | 1,550923754  | 6,17E+00  | 1,30E-02 | 1,13E-01 | Gm45403       |  | 1,35 | No  |
| ENSMUSG00000110010 | -9,47E-03 | -1,070277242 | 4,51E-04  | 9,83E-01 | 1,00E+00 | Gm45629       |  | 0,99 | No  |
| ENSMUSG00000110017 | -8,19E-01 | -2,268048636 | 9,79E-01  | 3,23E-01 | 6,23E-01 | Gm45237       |  | 0,57 | No  |
| ENSMUSG00000110018 | -5,32E-01 | 2,526138123  | 1,78E+01  | 2,42E-05 | 7,32E-04 | 5430437J10Rik |  | 0,69 | Yes |
| ENSMUSG00000110020 | 1,02E-01  | -1,946192323 | 2,42E-02  | 8,76E-01 | 1,00E+00 | Gm45441       |  | 1,07 | No  |
| ENSMUSG00000110030 | 5,29E-02  | 0,207036688  | 3,87E-02  | 8,44E-01 | 9,86E-01 | Gm45546       |  | 1,04 | No  |
| ENSMUSG00000110032 | -4,46E-01 | 0,330913254  | 2,80E+00  | 9,44E-02 | 3,84E-01 | Gm8436        |  | 0,73 | No  |

|                    |           |              |           |          |          |               |  |      |     |
|--------------------|-----------|--------------|-----------|----------|----------|---------------|--|------|-----|
| ENSMUSG00000110038 | 1,91E+00  | -2,655190456 | 2,72E+00  | 9,93E-02 | 3,92E-01 | Gm45570       |  | 3,76 | No  |
| ENSMUSG00000110040 | 3,23E-03  | 10,14235192  | 3,31E-03  | 9,54E-01 | 1,00E+00 | AC034099.1    |  | 1,00 | No  |
| ENSMUSG00000110044 | -2,10E-02 | -2,896131589 | 2,14E-04  | 9,88E-01 | 1,00E+00 | Gm45434       |  | 0,99 | No  |
| ENSMUSG00000110045 | -1,94E+00 | -3,107619243 | 1,50E+00  | 2,21E-01 | 5,50E-01 | Gm38590       |  | 0,26 | No  |
| ENSMUSG00000110046 | -3,83E-02 | -3,107651936 | -7,91E-11 | 1,00E+00 | 1,00E+00 | Gm45484       |  | 0,97 | No  |
| ENSMUSG00000110051 | -1,20E+00 | -2,31116742  | 1,85E+00  | 1,74E-01 | 5,31E-01 | Gm45322       |  | 0,44 | No  |
| ENSMUSG00000110057 | -1,06E-01 | 6,817057482  | 2,95E+00  | 8,59E-02 | 3,77E-01 | Gm2225        |  | 0,93 | No  |
| ENSMUSG00000110058 | -7,61E-02 | -2,963237265 | 2,63E-03  | 9,59E-01 | 1,00E+00 | Gm5907        |  | 0,95 | No  |
| ENSMUSG00000110062 | -3,95E-01 | -0,62075542  | 1,14E+00  | 2,86E-01 | 5,82E-01 | B430319F04Rik |  | 0,76 | No  |
| ENSMUSG00000110063 | -8,14E-01 | -2,831989846 | 3,64E-01  | 5,46E-01 | 8,14E-01 | Gm31045       |  | 0,57 | No  |
| ENSMUSG00000110065 | 4,74E-01  | -2,185675731 | 3,05E-01  | 5,81E-01 | 8,37E-01 | Gm45588       |  | 1,39 | No  |
| ENSMUSG00000110068 | -9,58E-01 | -2,497631536 | 8,04E-01  | 3,70E-01 | 6,71E-01 | Gm45294       |  | 0,51 | No  |
| ENSMUSG00000110069 | 6,50E-02  | 3,849222152  | 4,98E-01  | 4,81E-01 | 7,68E-01 | Gm45422       |  | 1,05 | No  |
| ENSMUSG00000110070 | 7,18E-01  | -2,107688764 | 8,34E-01  | 3,61E-01 | 6,63E-01 | Gm45619       |  | 1,64 | No  |
| ENSMUSG00000110075 | 1,87E+00  | -3,107639691 | 1,38E+00  | 2,40E-01 | 5,50E-01 | Gm45305       |  | 3,67 | No  |
| ENSMUSG00000110077 | 5,25E-01  | -0,367122153 | 2,58E+00  | 1,08E-01 | 4,02E-01 | Gm45632       |  | 1,44 | No  |
| ENSMUSG00000110079 | -1,20E+00 | -3,070140586 | 6,96E-01  | 4,04E-01 | 7,01E-01 | Gm45292       |  | 0,43 | No  |
| ENSMUSG00000110080 | -1,94E+00 | -3,107619243 | 1,50E+00  | 2,21E-01 | 5,50E-01 | Gm6145        |  | 0,26 | No  |
| ENSMUSG00000110081 | -8,15E-01 | -2,831982659 | 3,65E-01  | 5,46E-01 | 8,14E-01 | Gm19164       |  | 0,57 | No  |
| ENSMUSG00000110082 | -3,20E+00 | -2,896124245 | 4,32E+00  | 3,76E-02 | 2,31E-01 | Gm19201       |  | 0,11 | No  |
| ENSMUSG00000110087 | -2,85E-01 | -0,389653575 | 6,99E-01  | 4,03E-01 | 7,01E-01 | Gm45309       |  | 0,82 | No  |
| ENSMUSG00000110088 | 5,59E-02  | -0,832089964 | 1,68E-02  | 8,97E-01 | 1,00E+00 | Gm45343       |  | 1,04 | No  |
| ENSMUSG00000110089 | 1,83E+00  | -2,896143428 | 1,32E+00  | 2,50E-01 | 5,50E-01 | Gm36243       |  | 3,55 | No  |
| ENSMUSG00000110093 | -1,27E+00 | -3,146104694 | 7,49E-01  | 3,87E-01 | 6,87E-01 | Gm45282       |  | 0,42 | No  |
| ENSMUSG00000110099 | -4,87E-02 | -2,711744789 | 1,62E-03  | 9,68E-01 | 1,00E+00 | Gm45344       |  | 0,97 | No  |
| ENSMUSG00000110100 | 1,81E+00  | -3,10765737  | 1,28E+00  | 2,58E-01 | 5,50E-01 | Gm45261       |  | 3,49 | No  |
| ENSMUSG00000110102 | -9,23E-01 | -2,448598193 | 7,47E-01  | 3,87E-01 | 6,87E-01 | Gm9132        |  | 0,53 | No  |
| ENSMUSG00000110104 | -3,46E-01 | 4,192665053  | 1,63E+01  | 5,51E-05 | 1,47E-03 | Gm45717       |  | 0,79 | Yes |
| ENSMUSG00000110105 | 5,06E-02  | -0,643732286 | 1,74E-02  | 8,95E-01 | 1,00E+00 | Gm45844       |  | 1,04 | No  |
| ENSMUSG00000110109 | -3,83E-02 | -3,107651936 | -7,91E-11 | 1,00E+00 | 1,00E+00 | Gm5599        |  | 0,97 | No  |
| ENSMUSG00000110110 | 3,79E-01  | -2,401461522 | 2,30E-01  | 6,32E-01 | 8,64E-01 | Gm30978       |  | 1,30 | No  |
| ENSMUSG00000110114 | -3,30E-01 | -1,574164064 | 4,18E-01  | 5,18E-01 | 7,98E-01 | Gm45471       |  | 0,80 | No  |

|                    |           |              |           |          |          |               |      |    |
|--------------------|-----------|--------------|-----------|----------|----------|---------------|------|----|
| ENSMUSG00000110115 | 3,16E+00  | -2,963281728 | 4,07E+00  | 4,36E-02 | 2,49E-01 | Gm32486       | 8,92 | No |
| ENSMUSG00000110118 | -4,18E-02 | 1,533043424  | 5,53E-02  | 8,14E-01 | 9,68E-01 | Gm5609        | 0,97 | No |
| ENSMUSG00000110119 | -5,88E-02 | -3,033652696 | 1,62E-03  | 9,68E-01 | 1,00E+00 | Gm45593       | 0,96 | No |
| ENSMUSG00000110120 | -4,26E-01 | -1,311136005 | 8,64E-01  | 3,53E-01 | 6,54E-01 | Gm45251       | 0,74 | No |
| ENSMUSG00000110123 | -2,07E-01 | 2,135426644  | 2,03E+00  | 1,54E-01 | 4,98E-01 | Gm18562       | 0,87 | No |
| ENSMUSG00000110124 | -2,02E-01 | 0,545936486  | 6,16E-01  | 4,33E-01 | 7,26E-01 | Gm4247        | 0,87 | No |
| ENSMUSG00000110126 | 2,98E-01  | 2,236277897  | 4,53E+00  | 3,33E-02 | 2,14E-01 | Gm9347        | 1,23 | No |
| ENSMUSG00000110127 | -3,76E-01 | -1,401351173 | 4,77E-01  | 4,90E-01 | 7,76E-01 | 6430710M23Rik | 0,77 | No |
| ENSMUSG00000110129 | -1,11E+00 | -1,448568898 | 3,66E+00  | 5,59E-02 | 2,90E-01 | Gm45453       | 0,46 | No |
| ENSMUSG00000110130 | 1,84E+00  | -3,033649193 | 1,33E+00  | 2,49E-01 | 5,50E-01 | Gm34419       | 3,58 | No |
| ENSMUSG00000110131 | -3,83E-02 | -3,107651936 | -7,91E-11 | 1,00E+00 | 1,00E+00 | Gm18066       | 0,97 | No |
| ENSMUSG00000110134 | 1,87E+00  | -3,107639691 | 1,38E+00  | 2,40E-01 | 5,50E-01 | Gm45334       | 3,67 | No |
| ENSMUSG00000110136 | 3,33E-02  | 2,298097756  | 5,74E-02  | 8,11E-01 | 9,66E-01 | Gm45785       | 1,02 | No |
| ENSMUSG00000110138 | -1,30E-01 | 0,079197147  | 1,96E-01  | 6,58E-01 | 8,81E-01 | 4831440D22Rik | 0,91 | No |
| ENSMUSG00000110139 | -2,36E+00 | -2,998015648 | 2,18E+00  | 1,40E-01 | 4,73E-01 | Gm45783       | 0,19 | No |
| ENSMUSG00000110141 | 4,33E-01  | -2,033644373 | 4,08E-01  | 5,23E-01 | 8,01E-01 | Gm45684       | 1,35 | No |
| ENSMUSG00000110142 | -1,63E-02 | 0,578289136  | 4,21E-03  | 9,48E-01 | 1,00E+00 | Gm45872       | 0,99 | No |
| ENSMUSG00000110144 | 3,93E-01  | -2,832009207 | 1,19E-01  | 7,31E-01 | 9,21E-01 | Gm45564       | 1,31 | No |
| ENSMUSG00000110148 | -2,23E-01 | 1,839201478  | 2,07E+00  | 1,50E-01 | 4,91E-01 | 5830408C22Rik | 0,86 | No |
| ENSMUSG00000110149 | 4,62E-01  | -2,497657899 | 2,89E-01  | 5,91E-01 | 8,41E-01 | Gm7848        | 1,38 | No |
| ENSMUSG00000110150 | -5,30E-02 | -0,816351795 | 1,90E-02  | 8,90E-01 | 1,00E+00 | Gm8523        | 0,96 | No |
| ENSMUSG00000110153 | -1,87E+00 | -3,107637761 | 1,39E+00  | 2,38E-01 | 5,50E-01 | Gm17766       | 0,27 | No |
| ENSMUSG00000110154 | -3,83E-02 | -3,107651936 | -7,91E-11 | 1,00E+00 | 1,00E+00 | Gm9731        | 0,97 | No |
| ENSMUSG00000110156 | -2,18E-01 | -1,366881506 | 1,69E-01  | 6,81E-01 | 8,94E-01 | Gm42067       | 0,86 | No |
| ENSMUSG00000110159 | -1,26E+00 | -1,246773059 | 5,48E+00  | 1,92E-02 | 1,47E-01 | Gm45501       | 0,42 | No |
| ENSMUSG00000110162 | -8,47E-01 | -2,831940177 | 3,94E-01  | 5,30E-01 | 8,05E-01 | Gm45356       | 0,56 | No |
| ENSMUSG00000110164 | 7,15E-01  | -2,896175212 | 2,78E-01  | 5,98E-01 | 8,45E-01 | Gm7351        | 1,64 | No |
| ENSMUSG00000110165 | -1,80E-01 | -1,389874637 | 1,34E-01  | 7,14E-01 | 9,12E-01 | Gm4032        | 0,88 | No |
| ENSMUSG00000110166 | -2,56E-01 | -0,989236768 | 3,60E-01  | 5,48E-01 | 8,15E-01 | Gm45641       | 0,84 | No |
| ENSMUSG00000110167 | -2,30E+00 | -2,355562342 | 7,10E+00  | 7,69E-03 | 7,68E-02 | Gm45532       | 0,20 | No |
| ENSMUSG00000110170 | -8,02E-01 | -2,378278173 | 8,30E-01  | 3,62E-01 | 6,64E-01 | St6galnac2    | 0,57 | No |
| ENSMUSG00000110173 | 8,63E-03  | 4,218787359  | 1,04E-02  | 9,19E-01 | 1,00E+00 | Gm6929        | 1,01 | No |

|                    |           |              |           |          |          |               |      |     |
|--------------------|-----------|--------------|-----------|----------|----------|---------------|------|-----|
| ENSMUSG00000110175 | 4,52E-01  | 0,358413424  | 2,89E+00  | 8,94E-02 | 3,79E-01 | Gm18255       | 1,37 | No  |
| ENSMUSG00000110176 | -3,83E-02 | -3,107651936 | -7,91E-11 | 1,00E+00 | 1,00E+00 | Gm35520       | 0,97 | No  |
| ENSMUSG00000110177 | 2,31E-02  | 2,332928035  | 2,84E-02  | 8,66E-01 | 9,99E-01 | Gm6524        | 1,02 | No  |
| ENSMUSG00000110181 | 1,21E-01  | -1,800915149 | 2,86E-02  | 8,66E-01 | 9,98E-01 | Gm45508       | 1,09 | No  |
| ENSMUSG00000110183 | 1,59E-01  | 1,618805668  | 8,92E-01  | 3,45E-01 | 6,46E-01 | Gm45411       | 1,12 | No  |
| ENSMUSG00000110185 | 9,75E-02  | 0,666697389  | 1,86E-01  | 6,67E-01 | 8,86E-01 | Igip          | 1,07 | No  |
| ENSMUSG00000110188 | 1,85E+00  | -3,107657832 | 1,35E+00  | 2,46E-01 | 5,50E-01 | Gm45432       | 3,61 | No  |
| ENSMUSG00000110193 | -1,87E+00 | -3,107637761 | 1,39E+00  | 2,38E-01 | 5,50E-01 | Gm45452       | 0,27 | No  |
| ENSMUSG00000110194 | 5,02E-02  | 1,868530216  | 1,06E-01  | 7,45E-01 | 9,29E-01 | Gm7192        | 1,04 | No  |
| ENSMUSG00000110195 | 2,60E-02  | 3,934246457  | 8,37E-02  | 7,72E-01 | 9,43E-01 | Pde2a         | 1,02 | No  |
| ENSMUSG00000110197 | -5,81E-02 | 1,148193159  | 8,56E-02  | 7,70E-01 | 9,42E-01 | Gm45444       | 0,96 | No  |
| ENSMUSG00000110200 | -1,90E+00 | -3,033594154 | 1,44E+00  | 2,30E-01 | 5,50E-01 | Gm45316       | 0,27 | No  |
| ENSMUSG00000110202 | -1,90E+00 | -2,896076229 | 1,44E+00  | 2,30E-01 | 5,50E-01 | Gm45435       | 0,27 | No  |
| ENSMUSG00000110206 | 8,63E-02  | 2,503930207  | 4,57E-01  | 4,99E-01 | 7,84E-01 | Flt3l         | 1,06 | No  |
| ENSMUSG00000110208 | -3,69E-01 | -1,726223549 | 4,03E-01  | 5,26E-01 | 8,03E-01 | Gm45442       | 0,77 | No  |
| ENSMUSG00000110210 | -1,89E+00 | -3,1076441   | 1,42E+00  | 2,33E-01 | 5,50E-01 | Gm33756       | 0,27 | No  |
| ENSMUSG00000110213 | -4,13E+00 | -2,655017637 | 8,69E+00  | 3,19E-03 | 4,02E-02 | Gm45628       | 0,06 | Yes |
| ENSMUSG00000110218 | 1,33E-01  | 1,123570283  | 4,31E-01  | 5,11E-01 | 7,94E-01 | Gm20219       | 1,10 | No  |
| ENSMUSG00000110221 | -4,42E-01 | -1,12677542  | 9,73E-01  | 3,24E-01 | 6,24E-01 | Gm36210       | 0,74 | No  |
| ENSMUSG00000110222 | -2,66E+00 | -2,711653404 | 2,82E+00  | 9,33E-02 | 3,83E-01 | Gm39149       | 0,16 | No  |
| ENSMUSG00000110230 | 2,39E-01  | 0,464348381  | 8,91E-01  | 3,45E-01 | 6,46E-01 | Gm45846       | 1,18 | No  |
| ENSMUSG00000110234 | 2,23E-01  | 3,56720005   | 5,24E+00  | 2,20E-02 | 1,61E-01 | Gm45799       | 1,17 | No  |
| ENSMUSG00000110235 | 3,99E-01  | 0,309526767  | 2,47E+00  | 1,16E-01 | 4,22E-01 | Gm5086        | 1,32 | No  |
| ENSMUSG00000110237 | 1,27E+00  | -2,71162879  | 9,95E-01  | 3,19E-01 | 6,19E-01 | Gm18258       | 2,41 | No  |
| ENSMUSG00000110238 | -8,10E-01 | -1,929251903 | 1,56E+00  | 2,12E-01 | 5,50E-01 | Gm19269       | 0,57 | No  |
| ENSMUSG00000110239 | -1,36E+00 | -1,912600931 | 4,24E+00  | 3,95E-02 | 2,36E-01 | Gm45620       | 0,39 | No  |
| ENSMUSG00000110243 | 2,76E-01  | 1,183678589  | 1,89E+00  | 1,69E-01 | 5,24E-01 | Gm45631       | 1,21 | No  |
| ENSMUSG00000110244 | 5,95E-01  | -2,355543561 | 3,95E-01  | 5,30E-01 | 8,05E-01 | Gm2253        | 1,51 | No  |
| ENSMUSG00000110245 | -1,22E+00 | -0,395369573 | 1,34E+01  | 2,58E-04 | 5,37E-03 | Gm20100       | 0,43 | Yes |
| ENSMUSG00000110246 | -1,89E+00 | -3,1076441   | 1,42E+00  | 2,33E-01 | 5,50E-01 | C130073E24Rik | 0,27 | No  |
| ENSMUSG00000110247 | 1,60E+00  | -2,770664446 | 1,76E+00  | 1,84E-01 | 5,48E-01 | Gm45269       | 3,04 | No  |
| ENSMUSG00000110248 | -1,93E+00 | -2,070029019 | 6,12E+00  | 1,33E-02 | 1,16E-01 | Gm45615       | 0,26 | No  |



|                    |           |              |           |          |          |               |      |     |
|--------------------|-----------|--------------|-----------|----------|----------|---------------|------|-----|
| ENSMUSG00000110250 | -2,57E-02 | -0,587436754 | 4,99E-03  | 9,44E-01 | 1,00E+00 | Gm9077        | 0,98 | No  |
| ENSMUSG00000110251 | 1,89E-01  | -1,289571339 | 1,37E-01  | 7,11E-01 | 9,10E-01 | Gm2996        | 1,14 | No  |
| ENSMUSG00000110256 | -3,31E-01 | 1,563647407  | 3,56E+00  | 5,92E-02 | 3,01E-01 | Gm45412       | 0,80 | No  |
| ENSMUSG00000110258 | 2,37E+00  | -2,311137102 | 4,80E+00  | 2,85E-02 | 1,91E-01 | Gm45406       | 5,18 | No  |
| ENSMUSG00000110266 | 1,21E+00  | -2,896186976 | 9,04E-01  | 3,42E-01 | 6,42E-01 | Gm32742       | 2,31 | No  |
| ENSMUSG00000110270 | -3,96E-01 | -0,294591632 | 1,37E+00  | 2,42E-01 | 5,50E-01 | Gm45607       | 0,76 | No  |
| ENSMUSG00000110272 | 5,97E-03  | -3,1461183   | -3,40E-10 | 1,00E+00 | 1,00E+00 | Gm45310       | 1,00 | No  |
| ENSMUSG00000110273 | 2,61E+00  | -3,033672762 | 2,63E+00  | 1,05E-01 | 3,97E-01 | Gm41231       | 6,10 | No  |
| ENSMUSG00000110275 | -2,41E-01 | 8,738314836  | 1,77E+01  | 2,58E-05 | 7,72E-04 | Gm5905        | 0,85 | Yes |
| ENSMUSG00000110277 | 2,20E-02  | 1,685618603  | 1,84E-02  | 8,92E-01 | 1,00E+00 | Gm45871       | 1,02 | No  |
| ENSMUSG00000110278 | -2,55E-01 | -1,896059703 | 1,13E-01  | 7,36E-01 | 9,25E-01 | Gm5608        | 0,84 | No  |
| ENSMUSG00000110279 | -1,82E-01 | 3,749705624  | 3,68E+00  | 5,50E-02 | 2,87E-01 | Gm45552       | 0,88 | No  |
| ENSMUSG00000110282 | -5,01E-02 | -2,401388804 | 2,89E-03  | 9,57E-01 | 1,00E+00 | B930086L07Rik | 0,97 | No  |
| ENSMUSG00000110287 | 1,86E+00  | -2,963235356 | 1,35E+00  | 2,46E-01 | 5,50E-01 | Gm45313       | 3,62 | No  |
| ENSMUSG00000110289 | -5,29E-01 | 0,15238879   | 3,56E+00  | 5,92E-02 | 3,01E-01 | 4930412F12Rik | 0,69 | No  |
| ENSMUSG00000110291 | -6,67E-02 | -1,485203174 | 1,56E-02  | 9,01E-01 | 1,00E+00 | Gm37419       | 0,95 | No  |
| ENSMUSG00000110297 | -8,86E-02 | -2,963249454 | 3,57E-03  | 9,52E-01 | 1,00E+00 | Gm45647       | 0,94 | No  |
| ENSMUSG00000110298 | -3,10E-01 | -0,278694628 | 9,66E-01  | 3,26E-01 | 6,26E-01 | Gm8189        | 0,81 | No  |
| ENSMUSG00000110299 | -5,87E-01 | 0,206732864  | 5,09E+00  | 2,41E-02 | 1,70E-01 | Gm17910       | 0,67 | No  |
| ENSMUSG00000110301 | -2,03E+00 | -2,655073337 | 3,13E+00  | 7,67E-02 | 3,53E-01 | Gm35363       | 0,24 | No  |
| ENSMUSG00000110303 | -1,35E+00 | -2,565275831 | 1,27E+00  | 2,60E-01 | 5,53E-01 | Gm45328       | 0,39 | No  |
| ENSMUSG00000110306 | -3,83E-02 | -3,107651936 | -7,91E-11 | 1,00E+00 | 1,00E+00 | Gm18192       | 0,97 | No  |
| ENSMUSG00000110309 | 3,67E-01  | 1,295144602  | 3,64E+00  | 5,63E-02 | 2,91E-01 | Gm7419        | 1,29 | No  |
| ENSMUSG00000110311 | -3,20E+00 | -2,770601707 | 4,32E+00  | 3,76E-02 | 2,30E-01 | Gm45410       | 0,11 | No  |
| ENSMUSG00000110313 | -8,30E-01 | -2,711669023 | 3,79E-01  | 5,38E-01 | 8,09E-01 | Gm45420       | 0,56 | No  |
| ENSMUSG00000110316 | -5,74E-02 | -2,355609689 | 4,91E-03  | 9,44E-01 | 1,00E+00 | Gm45311       | 0,96 | No  |
| ENSMUSG00000110317 | 4,46E-02  | 0,432151862  | 3,42E-02  | 8,53E-01 | 9,91E-01 | Gm45250       | 1,03 | No  |
| ENSMUSG00000110318 | 5,11E-01  | -2,033660782 | 5,05E-01  | 4,77E-01 | 7,65E-01 | Gm2767        | 1,42 | No  |
| ENSMUSG00000110320 | -9,55E-01 | -2,711690055 | 7,99E-01  | 3,71E-01 | 6,72E-01 | Gm31152       | 0,52 | No  |
| ENSMUSG00000110325 | 4,52E-01  | -2,448666837 | 1,59E-01  | 6,90E-01 | 8,99E-01 | Gm45293       | 1,37 | No  |
| ENSMUSG00000110326 | 1,79E+00  | -3,033666867 | 1,28E+00  | 2,58E-01 | 5,50E-01 | Gm45378       | 3,46 | No  |
| ENSMUSG00000110327 | -7,18E-01 | -3,07014346  | 2,09E-01  | 6,48E-01 | 8,75E-01 | Gm17994       | 0,61 | No  |

|                    |           |              |          |          |          |               |      |    |
|--------------------|-----------|--------------|----------|----------|----------|---------------|------|----|
| ENSMUSG00000110329 | -2,73E+00 | -2,963241672 | 2,94E+00 | 8,62E-02 | 3,78E-01 | Gm45304       | 0,15 | No |
| ENSMUSG00000110331 | 7,78E-02  | 4,840349761  | 1,03E+00 | 3,09E-01 | 6,08E-01 | Nudc-ps1      | 1,06 | No |
| ENSMUSG00000110332 | 2,64E+00  | -3,033673223 | 2,69E+00 | 1,01E-01 | 3,92E-01 | Gm45396       | 6,23 | No |
| ENSMUSG00000110335 | 1,81E+00  | -3,10765737  | 1,28E+00 | 2,58E-01 | 5,50E-01 | 1700015I17Rik | 3,49 | No |
| ENSMUSG00000110338 | 4,55E-01  | -2,497555811 | 1,62E-01 | 6,88E-01 | 8,98E-01 | Gm45584       | 1,37 | No |
| ENSMUSG00000110341 | -3,29E-02 | -2,548157473 | 1,20E-03 | 9,72E-01 | 1,00E+00 | Gm45424       | 0,98 | No |
| ENSMUSG00000110344 | -2,25E-01 | 1,89499839   | 2,11E+00 | 1,46E-01 | 4,84E-01 | Gm45716       | 0,86 | No |
| ENSMUSG00000110345 | -1,59E+00 | -1,7406849   | 5,75E+00 | 1,65E-02 | 1,34E-01 | Gm45572       | 0,33 | No |
| ENSMUSG00000110348 | 4,71E-01  | -2,770591722 | 1,74E-01 | 6,77E-01 | 8,91E-01 | Gm4157        | 1,39 | No |
| ENSMUSG00000110350 | 6,61E-02  | 10,33111881  | 1,39E+00 | 2,39E-01 | 5,50E-01 | Gm10252       | 1,05 | No |
| ENSMUSG00000110351 | -1,33E+00 | -2,655105778 | 1,11E+00 | 2,92E-01 | 5,87E-01 | Gm32050       | 0,40 | No |
| ENSMUSG00000110355 | 2,21E-02  | 1,638615433  | 1,72E-02 | 8,96E-01 | 1,00E+00 | Gm7514        | 1,02 | No |
| ENSMUSG00000110357 | -2,63E-01 | -0,655222097 | 5,08E-01 | 4,76E-01 | 7,64E-01 | A030001D20Rik | 0,83 | No |
| ENSMUSG00000110360 | -4,55E-01 | -0,895962329 | 1,11E+00 | 2,93E-01 | 5,88E-01 | Gm45380       | 0,73 | No |
| ENSMUSG00000110361 | -2,09E-02 | 1,032038137  | 1,04E-02 | 9,19E-01 | 1,00E+00 | Gm8291        | 0,99 | No |
| ENSMUSG00000110365 | -6,07E-02 | -2,770585916 | 2,49E-03 | 9,60E-01 | 1,00E+00 | Gm38947       | 0,96 | No |
| ENSMUSG00000110367 | 1,09E+00  | -2,600683044 | 1,13E+00 | 2,88E-01 | 5,84E-01 | Gm34853       | 2,13 | No |
| ENSMUSG00000110368 | -5,14E-02 | -2,770612208 | 2,33E-03 | 9,61E-01 | 1,00E+00 | Gm45518       | 0,97 | No |
| ENSMUSG00000110371 | -4,36E-02 | 1,299171034  | 5,66E-02 | 8,12E-01 | 9,67E-01 | Gm9619        | 0,97 | No |
| ENSMUSG00000110374 | 1,23E-01  | -1,998027968 | 2,99E-02 | 8,63E-01 | 9,97E-01 | Gm31172       | 1,09 | No |
| ENSMUSG00000110377 | -3,32E-01 | -0,372425478 | 9,23E-01 | 3,37E-01 | 6,37E-01 | Gm45363       | 0,79 | No |
| ENSMUSG00000110378 | 2,29E-02  | 0,041059102  | 6,25E-03 | 9,37E-01 | 1,00E+00 | Gm45242       | 1,02 | No |
| ENSMUSG00000110382 | 7,20E-01  | -2,963285673 | 2,81E-01 | 5,96E-01 | 8,44E-01 | Gm29895       | 1,65 | No |
| ENSMUSG00000110384 | -1,94E+00 | -3,107619243 | 1,50E+00 | 2,21E-01 | 5,50E-01 | Gm45301       | 0,26 | No |
| ENSMUSG00000110386 | -6,15E-02 | 1,941486272  | 1,62E-01 | 6,88E-01 | 8,98E-01 | Gm42031       | 0,96 | No |
| ENSMUSG00000110388 | 7,00E-02  | 0,316642943  | 6,82E-02 | 7,94E-01 | 9,56E-01 | Gm30329       | 1,05 | No |
| ENSMUSG00000110391 | 1,01E-01  | -1,333208136 | 4,27E-02 | 8,36E-01 | 9,81E-01 | Gm7269        | 1,07 | No |
| ENSMUSG00000110393 | -6,45E-03 | 2,304148324  | 2,26E-03 | 9,62E-01 | 1,00E+00 | Gm36445       | 1,00 | No |
| ENSMUSG00000110397 | -1,37E+00 | -2,770588245 | 1,18E+00 | 2,77E-01 | 5,73E-01 | Gm45540       | 0,39 | No |
| ENSMUSG00000110399 | 1,25E+00  | -2,896187899 | 9,68E-01 | 3,25E-01 | 6,26E-01 | Gm45238       | 2,38 | No |
| ENSMUSG00000110400 | -9,22E-01 | -2,711729588 | 7,43E-01 | 3,89E-01 | 6,89E-01 | Gm45416       | 0,53 | No |
| ENSMUSG00000110403 | 7,81E-01  | -1,711686881 | 1,50E+00 | 2,21E-01 | 5,50E-01 | Gm45553       | 1,72 | No |

|                    |           |              |           |          |          |               |      |     |
|--------------------|-----------|--------------|-----------|----------|----------|---------------|------|-----|
| ENSMUSG00000110404 | 1,07E-01  | -0,522888523 | 8,46E-02  | 7,71E-01 | 9,43E-01 | Rnf223        | 1,08 | No  |
| ENSMUSG00000110405 | 8,47E-02  | -1,89608816  | 1,75E-02  | 8,95E-01 | 1,00E+00 | Gm45534       | 1,06 | No  |
| ENSMUSG00000110407 | 6,75E-01  | -0,912534331 | 2,46E+00  | 1,17E-01 | 4,23E-01 | Gm45454       | 1,60 | No  |
| ENSMUSG00000110409 | -1,89E+00 | -3,033648118 | 1,42E+00  | 2,33E-01 | 5,50E-01 | Gm9908        | 0,27 | No  |
| ENSMUSG00000110410 | -5,06E-02 | -2,311055578 | 3,54E-03  | 9,53E-01 | 1,00E+00 | 4933421D24Rik | 0,97 | No  |
| ENSMUSG00000110414 | 1,18E+00  | -0,344737107 | 1,32E+01  | 2,83E-04 | 5,78E-03 | Gm45481       | 2,26 | Yes |
| ENSMUSG00000110419 | -3,23E-01 | 1,973704218  | 4,77E+00  | 2,89E-02 | 1,93E-01 | AW046200      | 0,80 | No  |
| ENSMUSG00000110422 | 1,68E-01  | 0,848979718  | 6,00E-01  | 4,38E-01 | 7,31E-01 | Gm17999       | 1,12 | No  |
| ENSMUSG00000110423 | -2,06E-02 | 3,043360718  | 3,41E-02  | 8,54E-01 | 9,91E-01 | Gm45736       | 0,99 | No  |
| ENSMUSG00000110424 | -1,08E+00 | -0,785686621 | 7,67E+00  | 5,60E-03 | 6,07E-02 | 1700012D14Rik | 0,47 | No  |
| ENSMUSG00000110426 | -2,88E-02 | -2,896137924 | 4,65E-04  | 9,83E-01 | 1,00E+00 | Gm45757       | 0,98 | No  |
| ENSMUSG00000110428 | 1,37E+00  | -1,99806721  | 2,31E+00  | 1,28E-01 | 4,50E-01 | Gm45812       | 2,59 | No  |
| ENSMUSG00000110429 | 5,52E-01  | -1,929318202 | 6,92E-01  | 4,06E-01 | 7,02E-01 | Gm2059        | 1,47 | No  |
| ENSMUSG00000110430 | 2,29E-01  | -2,239912246 | 7,92E-02  | 7,78E-01 | 9,47E-01 | Cmtm1         | 1,17 | No  |
| ENSMUSG00000110433 | 2,85E-01  | 0,191154561  | 9,94E-01  | 3,19E-01 | 6,19E-01 | Gm45820       | 1,22 | No  |
| ENSMUSG00000110434 | 1,85E+00  | -3,107657832 | 1,35E+00  | 2,46E-01 | 5,50E-01 | Rps7-ps1      | 3,61 | No  |
| ENSMUSG00000110435 | 2,74E-01  | 0,425652404  | 1,13E+00  | 2,87E-01 | 5,83E-01 | Gm3635        | 1,21 | No  |
| ENSMUSG00000110438 | 1,90E+00  | -2,655158888 | 2,69E+00  | 1,01E-01 | 3,93E-01 | Gm45756       | 3,73 | No  |
| ENSMUSG00000110440 | 5,02E-02  | 3,844162908  | 2,97E-01  | 5,86E-01 | 8,39E-01 | Gm45894       | 1,04 | No  |
| ENSMUSG00000110442 | 7,57E-03  | -0,472950516 | 4,66E-04  | 9,83E-01 | 1,00E+00 | Gm45804       | 1,01 | No  |
| ENSMUSG00000110443 | -9,97E-01 | -2,497552867 | 1,20E+00  | 2,73E-01 | 5,69E-01 | Gm39197       | 0,50 | No  |
| ENSMUSG00000110444 | 2,54E-01  | 2,191148118  | 3,33E+00  | 6,79E-02 | 3,28E-01 | Gm10033       | 1,19 | No  |
| ENSMUSG00000110445 | -1,87E+00 | -3,107637761 | 1,39E+00  | 2,38E-01 | 5,50E-01 | Gm45747       | 0,27 | No  |
| ENSMUSG00000110446 | -1,60E-01 | 5,16299116   | 4,90E+00  | 2,68E-02 | 1,84E-01 | Gm18646       | 0,90 | No  |
| ENSMUSG00000110448 | -2,71E+00 | -3,033620915 | 2,92E+00  | 8,75E-02 | 3,78E-01 | Gm33242       | 0,15 | No  |
| ENSMUSG00000110450 | 7,53E-01  | -2,770606762 | 3,08E-01  | 5,79E-01 | 8,36E-01 | Gm7943        | 1,68 | No  |
| ENSMUSG00000110456 | -3,83E-02 | -3,107651936 | -7,91E-11 | 1,00E+00 | 1,00E+00 | Gm45865       | 0,97 | No  |
| ENSMUSG00000110457 | -7,05E-02 | 6,04064826   | 1,16E+00  | 2,82E-01 | 5,78E-01 | Gm45752       | 0,95 | No  |
| ENSMUSG00000110458 | 6,12E-01  | -0,141404762 | 3,71E+00  | 5,41E-02 | 2,84E-01 | Gm21769       | 1,53 | No  |
| ENSMUSG00000110462 | 7,40E-01  | -2,770595334 | 2,98E-01  | 5,85E-01 | 8,39E-01 | Gm35572       | 1,67 | No  |
| ENSMUSG00000110464 | -1,87E+00 | -3,107637761 | 1,39E+00  | 2,38E-01 | 5,50E-01 | 1700061N14Rik | 0,27 | No  |
| ENSMUSG00000110469 | 1,28E-01  | 5,952717814  | 3,79E+00  | 5,14E-02 | 2,76E-01 | Gm10358       | 1,09 | No  |

|                    |           |              |           |          |          |               |      |     |
|--------------------|-----------|--------------|-----------|----------|----------|---------------|------|-----|
| ENSMUSG00000110471 | 4,13E-01  | -2,52271227  | 2,02E-01  | 6,53E-01 | 8,78E-01 | Gm45823       | 1,33 | No  |
| ENSMUSG00000110472 | -1,88E+00 | -2,963233427 | 1,42E+00  | 2,33E-01 | 5,50E-01 | Gm45739       | 0,27 | No  |
| ENSMUSG00000110473 | 3,14E-02  | -3,107617333 | -7,69E-10 | 1,00E+00 | 1,00E+00 | Gm29705       | 1,02 | No  |
| ENSMUSG00000110475 | 9,01E-03  | -3,107646452 | -5,16E-10 | 1,00E+00 | 1,00E+00 | Gm31036       | 1,01 | No  |
| ENSMUSG00000110481 | 3,23E-01  | -2,683161726 | 1,07E-01  | 7,44E-01 | 9,29E-01 | Gm45705       | 1,25 | No  |
| ENSMUSG00000110484 | -8,62E-02 | -2,448730346 | 8,51E-03  | 9,27E-01 | 1,00E+00 | Gm45712       | 0,94 | No  |
| ENSMUSG00000110485 | -1,32E+00 | -2,770524975 | 1,09E+00  | 2,96E-01 | 5,92E-01 | Gm45740       | 0,40 | No  |
| ENSMUSG00000110486 | -1,38E+00 | -2,26807827  | 2,62E+00  | 1,05E-01 | 3,97E-01 | Gm45877       | 0,38 | No  |
| ENSMUSG00000110489 | -8,66E-02 | -2,268137846 | 1,31E-02  | 9,09E-01 | 1,00E+00 | Gm31659       | 0,94 | No  |
| ENSMUSG00000110490 | -1,94E+00 | -3,107619243 | 1,50E+00  | 2,21E-01 | 5,50E-01 | Vmn2r-ps91    | 0,26 | No  |
| ENSMUSG00000110491 | 1,87E+00  | -3,107639691 | 1,38E+00  | 2,40E-01 | 5,50E-01 | Gm31138       | 3,67 | No  |
| ENSMUSG00000110495 | 9,04E-01  | -1,355533536 | 2,89E+00  | 8,92E-02 | 3,79E-01 | Gm45879       | 1,87 | No  |
| ENSMUSG00000110498 | -1,30E-01 | 0,206777948  | 2,08E-01  | 6,49E-01 | 8,75E-01 | A630001O12Rik | 0,91 | No  |
| ENSMUSG00000110499 | -6,45E-01 | -1,247034463 | 2,01E+00  | 1,57E-01 | 5,01E-01 | Gm45873       | 0,64 | No  |
| ENSMUSG00000110500 | -3,74E-01 | -0,236638465 | 1,32E+00  | 2,51E-01 | 5,50E-01 | Gm32568       | 0,77 | No  |
| ENSMUSG00000110501 | 7,38E-01  | -2,832038134 | 2,96E-01  | 5,86E-01 | 8,39E-01 | Gm45900       | 1,67 | No  |
| ENSMUSG00000110504 | -1,37E+00 | -0,424587973 | 1,44E+01  | 1,51E-04 | 3,41E-03 | Gm45797       | 0,39 | Yes |
| ENSMUSG00000110505 | 1,46E-01  | 0,6044035    | 3,81E-01  | 5,37E-01 | 8,09E-01 | Gm45842       | 1,11 | No  |
| ENSMUSG00000110507 | 9,01E-03  | -3,107646452 | -5,16E-10 | 1,00E+00 | 1,00E+00 | 8030455M16Rik | 1,01 | No  |
| ENSMUSG00000110508 | 9,01E-03  | -3,107646452 | -5,16E-10 | 1,00E+00 | 1,00E+00 | Gm8940        | 1,01 | No  |
| ENSMUSG00000110512 | -1,94E+00 | -3,107619243 | 1,50E+00  | 2,21E-01 | 5,50E-01 | Gm45827       | 0,26 | No  |
| ENSMUSG00000110514 | -2,68E+00 | -2,831994891 | 2,86E+00  | 9,07E-02 | 3,82E-01 | Gm7688        | 0,16 | No  |
| ENSMUSG00000110515 | -5,36E-02 | -2,268069055 | 4,64E-03  | 9,46E-01 | 1,00E+00 | Gm9644        | 0,96 | No  |
| ENSMUSG00000110516 | 4,32E-01  | -0,7409982   | 1,19E+00  | 2,76E-01 | 5,73E-01 | Gm45758       | 1,35 | No  |
| ENSMUSG00000110517 | 5,48E-01  | -2,800983724 | 1,99E-01  | 6,56E-01 | 8,80E-01 | Gm31224       | 1,46 | No  |
| ENSMUSG00000110519 | 1,85E+00  | -3,107657832 | 1,35E+00  | 2,46E-01 | 5,50E-01 | Olfr839-ps1   | 3,61 | No  |
| ENSMUSG00000110521 | 1,55E+00  | -2,497680207 | 2,60E+00  | 1,07E-01 | 3,99E-01 | Olfr856-ps1   | 2,92 | No  |
| ENSMUSG00000110523 | 1,21E-02  | -3,033650469 | 7,34E-11  | 1,00E+00 | 1,00E+00 | C230057M02Rik | 1,01 | No  |
| ENSMUSG00000110524 | -5,76E-01 | -2,770582346 | 2,60E-01  | 6,10E-01 | 8,51E-01 | Gm39228       | 0,67 | No  |
| ENSMUSG00000110525 | 4,45E-01  | -2,77066931  | 1,54E-01  | 6,95E-01 | 9,02E-01 | Gm45893       | 1,36 | No  |
| ENSMUSG00000110528 | -2,24E-01 | 2,296266008  | 2,61E+00  | 1,06E-01 | 3,99E-01 | Gm1943        | 0,86 | No  |
| ENSMUSG00000110529 | -3,15E-01 | -1,448746009 | 4,27E-01  | 5,13E-01 | 7,95E-01 | Gm45694       | 0,80 | No  |

|                    |           |              |           |          |          |               |      |     |
|--------------------|-----------|--------------|-----------|----------|----------|---------------|------|-----|
| ENSMUSG00000110530 | 3,96E-01  | -1,912675102 | 3,59E-01  | 5,49E-01 | 8,16E-01 | Gm35934       | 1,32 | No  |
| ENSMUSG00000110531 | 2,74E-02  | -3,033621357 | 9,16E-12  | 1,00E+00 | 1,00E+00 | Gm7760        | 1,02 | No  |
| ENSMUSG00000110532 | -4,78E-01 | -0,300189821 | 2,07E+00  | 1,50E-01 | 4,91E-01 | Gm35857       | 0,72 | No  |
| ENSMUSG00000110533 | 3,21E-01  | -2,146108637 | 1,90E-01  | 6,63E-01 | 8,83E-01 | LOC665443     | 1,25 | No  |
| ENSMUSG00000110537 | 1,15E-01  | 2,221796772  | 6,83E-01  | 4,08E-01 | 7,05E-01 | Gm4316        | 1,08 | No  |
| ENSMUSG00000110538 | 7,06E-01  | -2,896181546 | 2,71E-01  | 6,03E-01 | 8,48E-01 | Gm33178       | 1,63 | No  |
| ENSMUSG00000110540 | 4,37E-01  | -0,1558788   | 1,79E+00  | 1,81E-01 | 5,43E-01 | Gm45743       | 1,35 | No  |
| ENSMUSG00000110542 | -8,12E-01 | -2,896138345 | 3,61E-01  | 5,48E-01 | 8,15E-01 | Gm39139       | 0,57 | No  |
| ENSMUSG00000110543 | 1,55E+00  | -2,146221467 | 3,61E+00  | 5,74E-02 | 2,95E-01 | Umpk-ps       | 2,93 | No  |
| ENSMUSG00000110544 | 9,01E-03  | -3,107646452 | -5,16E-10 | 1,00E+00 | 1,00E+00 | Gm2607        | 1,01 | No  |
| ENSMUSG00000110545 | 2,28E-02  | 5,65621124   | 1,13E-01  | 7,37E-01 | 9,25E-01 | Gm7730        | 1,02 | No  |
| ENSMUSG00000110546 | -2,45E-01 | 1,010747592  | 1,35E+00  | 2,45E-01 | 5,50E-01 | Gm45734       | 0,84 | No  |
| ENSMUSG00000110547 | -4,73E-01 | -0,146092824 | 2,40E+00  | 1,21E-01 | 4,35E-01 | Gm29773       | 0,72 | No  |
| ENSMUSG00000110556 | 4,45E-01  | -2,44868326  | 1,55E-01  | 6,94E-01 | 9,02E-01 | Gm45762       | 1,36 | No  |
| ENSMUSG00000110558 | -2,08E+00 | -1,321851199 | 1,37E+01  | 2,12E-04 | 4,55E-03 | Gm45779       | 0,24 | Yes |
| ENSMUSG00000110562 | 1,87E+00  | -3,107639691 | 1,38E+00  | 2,40E-01 | 5,50E-01 | Gm9204        | 3,67 | No  |
| ENSMUSG00000110567 | 4,97E-02  | 0,908773317  | 5,29E-02  | 8,18E-01 | 9,70E-01 | Gm45703       | 1,04 | No  |
| ENSMUSG00000110569 | -3,19E-02 | 3,695739133  | 1,14E-01  | 7,36E-01 | 9,24E-01 | Gm18860       | 0,98 | No  |
| ENSMUSG00000110570 | 1,07E+00  | -2,311176702 | 1,47E+00  | 2,26E-01 | 5,50E-01 | Gm45778       | 2,10 | No  |
| ENSMUSG00000110573 | -1,89E+00 | -2,96318033  | 1,43E+00  | 2,33E-01 | 5,50E-01 | Gm5485        | 0,27 | No  |
| ENSMUSG00000110574 | 5,62E-01  | -1,963368988 | 7,19E-01  | 3,96E-01 | 6,97E-01 | Gm21112       | 1,48 | No  |
| ENSMUSG00000110575 | -4,44E-02 | 5,417668649  | 4,08E-01  | 5,23E-01 | 8,01E-01 | 6330537M06Rik | 0,97 | No  |
| ENSMUSG00000110580 | 3,58E-01  | -0,70452344  | 8,48E-01  | 3,57E-01 | 6,58E-01 | D830024N08Rik | 1,28 | No  |
| ENSMUSG00000110581 | -1,87E+00 | -3,107637761 | 1,39E+00  | 2,38E-01 | 5,50E-01 | Gm45789       | 0,27 | No  |
| ENSMUSG00000110586 | -2,43E-02 | -2,896167096 | 5,15E-11  | 1,00E+00 | 1,00E+00 | 4930578M07Rik | 0,98 | No  |
| ENSMUSG00000110587 | -1,87E+00 | -3,107637761 | 1,39E+00  | 2,38E-01 | 5,50E-01 | Gm7344        | 0,27 | No  |
| ENSMUSG00000110588 | 3,83E-02  | 5,105577677  | 2,76E-01  | 5,99E-01 | 8,46E-01 | Gm45774       | 1,03 | No  |
| ENSMUSG00000110589 | -5,01E-02 | -2,600659285 | 2,29E-03  | 9,62E-01 | 1,00E+00 | Gm45754       | 0,97 | No  |
| ENSMUSG00000110591 | 1,85E+00  | -3,107657832 | 1,35E+00  | 2,46E-01 | 5,50E-01 | Gm31371       | 3,61 | No  |
| ENSMUSG00000110592 | 7,59E-01  | -2,770596649 | 3,13E-01  | 5,76E-01 | 8,34E-01 | 4930488N15Rik | 1,69 | No  |
| ENSMUSG00000110593 | 2,28E-01  | -0,221381917 | 4,73E-01  | 4,91E-01 | 7,77E-01 | Gm45822       | 1,17 | No  |
| ENSMUSG00000110594 | 1,57E-01  | -0,11724476  | 2,83E-01  | 5,95E-01 | 8,44E-01 | Gm33103       | 1,11 | No  |

|                    |           |              |           |          |          |               |      |    |
|--------------------|-----------|--------------|-----------|----------|----------|---------------|------|----|
| ENSMUSG00000110597 | -3,15E+00 | -2,963239677 | 4,17E+00  | 4,13E-02 | 2,41E-01 | Gm8798        | 0,11 | No |
| ENSMUSG00000110598 | 1,30E-01  | 1,688741218  | 5,93E-01  | 4,41E-01 | 7,33E-01 | Gm45854       | 1,09 | No |
| ENSMUSG00000110600 | 1,87E+00  | -3,107639691 | 1,38E+00  | 2,40E-01 | 5,50E-01 | Gm45878       | 3,67 | No |
| ENSMUSG00000110601 | -6,14E-02 | -2,711747012 | 3,42E-03  | 9,53E-01 | 1,00E+00 | Gm45834       | 0,96 | No |
| ENSMUSG00000110605 | 4,23E-01  | 0,615463177  | 3,30E+00  | 6,95E-02 | 3,32E-01 | Gm32856       | 1,34 | No |
| ENSMUSG00000110608 | 1,62E+00  | -2,711722211 | 1,80E+00  | 1,80E-01 | 5,42E-01 | Gm8838        | 3,07 | No |
| ENSMUSG00000110610 | 1,60E-01  | 3,838199658  | 3,04E+00  | 8,13E-02 | 3,66E-01 | Gm7769        | 1,12 | No |
| ENSMUSG00000110611 | -1,00E+00 | -1,963053892 | 1,55E+00  | 2,14E-01 | 5,50E-01 | Gm20163       | 0,50 | No |
| ENSMUSG00000110612 | 1,18E+00  | -1,998057247 | 2,37E+00  | 1,24E-01 | 4,40E-01 | Gm17827       | 2,27 | No |
| ENSMUSG00000110615 | 1,87E-01  | 1,910610602  | 1,45E+00  | 2,29E-01 | 5,50E-01 | Gm45890       | 1,14 | No |
| ENSMUSG00000110617 | 2,95E-02  | 5,518495503  | 1,83E-01  | 6,69E-01 | 8,87E-01 | Gm5910        | 1,02 | No |
| ENSMUSG00000110618 | 3,14E-01  | -2,600706307 | 1,01E-01  | 7,51E-01 | 9,32E-01 | Gm39822       | 1,24 | No |
| ENSMUSG00000110619 | 1,21E+00  | -2,832060368 | 9,03E-01  | 3,42E-01 | 6,42E-01 | Gm7850        | 2,31 | No |
| ENSMUSG00000110620 | 2,70E-02  | 0,236981565  | 1,05E-02  | 9,18E-01 | 1,00E+00 | Gm45733       | 1,02 | No |
| ENSMUSG00000110622 | 3,24E-01  | -2,655119675 | 1,07E-01  | 7,43E-01 | 9,28E-01 | Gm16486       | 1,25 | No |
| ENSMUSG00000110626 | -1,10E+00 | -1,185354222 | 4,83E+00  | 2,80E-02 | 1,89E-01 | Gm45805       | 0,47 | No |
| ENSMUSG00000110627 | 7,99E-02  | -0,344307944 | 5,47E-02  | 8,15E-01 | 9,69E-01 | Gm18935       | 1,06 | No |
| ENSMUSG00000110630 | 4,64E-02  | 0,633220879  | 3,86E-02  | 8,44E-01 | 9,86E-01 | K230015D01Rik | 1,03 | No |
| ENSMUSG00000110631 | -1,35E-02 | 8,820702118  | 5,63E-02  | 8,12E-01 | 9,67E-01 | Gm42047       | 0,99 | No |
| ENSMUSG00000110634 | -3,83E-02 | -3,107651936 | -7,91E-11 | 1,00E+00 | 1,00E+00 | Gm45895       | 0,97 | No |
| ENSMUSG00000110635 | -4,88E-01 | 1,369585055  | 6,53E+00  | 1,06E-02 | 9,75E-02 | Gm45853       | 0,71 | No |
| ENSMUSG00000110636 | 2,61E+00  | -3,033672762 | 2,63E+00  | 1,05E-01 | 3,97E-01 | Gm39397       | 6,10 | No |
| ENSMUSG00000110637 | 8,59E-01  | -2,22631048  | 8,87E-01  | 3,46E-01 | 6,47E-01 | Gm7807        | 1,81 | No |
| ENSMUSG00000110638 | -7,38E-02 | -3,033659033 | 2,66E-03  | 9,59E-01 | 1,00E+00 | Gm45887       | 0,95 | No |
| ENSMUSG00000110639 | 1,87E+00  | -3,107639691 | 1,38E+00  | 2,40E-01 | 5,50E-01 | Gm6831        | 3,67 | No |
| ENSMUSG00000110640 | -3,83E-02 | -3,107651936 | -7,91E-11 | 1,00E+00 | 1,00E+00 | Gm45903       | 0,97 | No |
| ENSMUSG00000110641 | 1,23E+00  | -3,107628512 | 6,90E-01  | 4,06E-01 | 7,02E-01 | Gm45826       | 2,35 | No |
| ENSMUSG00000110642 | 1,01E+00  | -1,963291778 | 1,97E+00  | 1,60E-01 | 5,08E-01 | Gm45710       | 2,01 | No |
| ENSMUSG00000110644 | 3,79E-02  | 5,525587699  | 3,01E-01  | 5,83E-01 | 8,38E-01 | Gm7390        | 1,03 | No |
| ENSMUSG00000110647 | 1,78E-01  | -1,165647341 | 1,44E-01  | 7,04E-01 | 9,06E-01 | Gm17745       | 1,13 | No |
| ENSMUSG00000110648 | 1,05E+00  | -2,448724939 | 1,42E+00  | 2,33E-01 | 5,50E-01 | Gm38574       | 2,08 | No |
| ENSMUSG00000110649 | -2,53E-01 | -0,740872288 | 3,51E-01  | 5,54E-01 | 8,19E-01 | Gm40466       | 0,84 | No |

|                    |           |              |          |          |          |               |      |    |
|--------------------|-----------|--------------|----------|----------|----------|---------------|------|----|
| ENSMUSG00000110650 | 3,17E+00  | -2,963263597 | 4,11E+00 | 4,28E-02 | 2,46E-01 | Gm19170       | 8,99 | No |
| ENSMUSG00000110652 | 4,45E-01  | -1,770702263 | 4,07E-01 | 5,23E-01 | 8,01E-01 | Gm33023       | 1,36 | No |
| ENSMUSG00000110654 | 1,79E+00  | -3,033666867 | 1,28E+00 | 2,58E-01 | 5,50E-01 | Gm45746       | 3,46 | No |
| ENSMUSG00000110656 | 2,98E-01  | 1,843443584  | 3,56E+00 | 5,93E-02 | 3,01E-01 | Gm20735       | 1,23 | No |
| ENSMUSG00000110657 | -3,08E-01 | 2,445654532  | 5,48E+00 | 1,93E-02 | 1,48E-01 | Gm7684        | 0,81 | No |
| ENSMUSG00000110658 | 3,13E+00  | -2,770626346 | 4,01E+00 | 4,53E-02 | 2,54E-01 | Gm45857       | 8,78 | No |
| ENSMUSG00000110660 | 3,96E-02  | 3,455871521  | 1,54E-01 | 6,95E-01 | 9,02E-01 | Gm5362        | 1,03 | No |
| ENSMUSG00000110661 | 1,04E+00  | -1,929254139 | 1,74E+00 | 1,87E-01 | 5,50E-01 | Gm31805       | 2,05 | No |
| ENSMUSG00000110664 | 1,85E+00  | -2,832018147 | 1,34E+00 | 2,47E-01 | 5,50E-01 | Aprt-ps       | 3,61 | No |
| ENSMUSG00000110666 | -1,47E-01 | 0,610313455  | 3,85E-01 | 5,35E-01 | 8,07E-01 | Gm9172        | 0,90 | No |
| ENSMUSG00000110669 | -4,80E-02 | 0,929984919  | 5,07E-02 | 8,22E-01 | 9,72E-01 | Gm10060       | 0,97 | No |
| ENSMUSG00000110673 | -1,92E+00 | -3,0336536   | 1,46E+00 | 2,27E-01 | 5,50E-01 | Gm45833       | 0,26 | No |
| ENSMUSG00000110674 | -6,98E-01 | -2,963230287 | 1,96E-01 | 6,58E-01 | 8,81E-01 | Gm45892       | 0,62 | No |
| ENSMUSG00000110676 | -1,87E+00 | -2,226181173 | 4,07E+00 | 4,37E-02 | 2,49E-01 | Gm45897       | 0,27 | No |
| ENSMUSG00000110677 | 1,85E+00  | -3,107657832 | 1,35E+00 | 2,46E-01 | 5,50E-01 | Gm45777       | 3,61 | No |
| ENSMUSG00000110679 | -1,50E-01 | 7,310289975  | 6,35E+00 | 1,17E-02 | 1,05E-01 | Rpl10-ps5     | 0,90 | No |
| ENSMUSG00000110682 | -1,20E-01 | 0,379082504  | 2,19E-01 | 6,40E-01 | 8,70E-01 | A530010L16Rik | 0,92 | No |
| ENSMUSG00000110683 | 3,01E-01  | -1,711641325 | 2,62E-01 | 6,09E-01 | 8,51E-01 | Gm45874       | 1,23 | No |
| ENSMUSG00000110685 | 1,84E+00  | -3,033632273 | 1,33E+00 | 2,49E-01 | 5,50E-01 | Gm5373        | 3,58 | No |
| ENSMUSG00000110686 | 4,26E-02  | 6,039840633  | 4,27E-01 | 5,13E-01 | 7,95E-01 | Gm45855       | 1,03 | No |
| ENSMUSG00000110689 | 1,19E+00  | -1,963270773 | 2,39E+00 | 1,22E-01 | 4,36E-01 | Gm45731       | 2,28 | No |
| ENSMUSG00000110690 | -5,68E-01 | -2,770655596 | 2,53E-01 | 6,15E-01 | 8,54E-01 | Gm18001       | 0,67 | No |
| ENSMUSG00000110692 | 1,87E+00  | -3,107639691 | 1,38E+00 | 2,40E-01 | 5,50E-01 | Gm33460       | 3,67 | No |
| ENSMUSG00000110693 | 8,20E-01  | -2,401411876 | 5,85E-01 | 4,44E-01 | 7,36E-01 | Gm45899       | 1,77 | No |
| ENSMUSG00000110696 | 3,23E-01  | -2,683161726 | 1,07E-01 | 7,44E-01 | 9,29E-01 | Gm45706       | 1,25 | No |
| ENSMUSG00000110697 | -1,57E-01 | 2,624695631  | 1,57E+00 | 2,11E-01 | 5,50E-01 | Gm31718       | 0,90 | No |
| ENSMUSG00000110699 | -1,87E+00 | -3,107637761 | 1,39E+00 | 2,38E-01 | 5,50E-01 | Gm20946       | 0,27 | No |
| ENSMUSG00000110700 | 6,60E-01  | -2,448685169 | 6,29E-01 | 4,28E-01 | 7,21E-01 | Gm5357        | 1,58 | No |
| ENSMUSG00000110701 | -2,19E+00 | -2,070116449 | 6,18E+00 | 1,29E-02 | 1,13E-01 | Gm6013        | 0,22 | No |
| ENSMUSG00000110702 | -6,09E-01 | -1,257566212 | 1,56E+00 | 2,12E-01 | 5,50E-01 | Gm45767       | 0,66 | No |
| ENSMUSG00000110704 | 3,90E-01  | 0,195036575  | 2,02E+00 | 1,55E-01 | 4,99E-01 | Gm45732       | 1,31 | No |
| ENSMUSG00000110706 | 1,77E-01  | 1,033520956  | 7,61E-01 | 3,83E-01 | 6,85E-01 | Gm45709       | 1,13 | No |

|                    |           |              |           |          |          |                |      |     |
|--------------------|-----------|--------------|-----------|----------|----------|----------------|------|-----|
| ENSMUSG00000110708 | -1,24E+00 | 0,19180875   | 2,02E+01  | 7,07E-06 | 2,45E-04 | Gnb1-ps3       | 0,42 | Yes |
| ENSMUSG00000110710 | 6,46E-01  | -1,980558139 | 9,17E-01  | 3,38E-01 | 6,39E-01 | C78859         | 1,56 | No  |
| ENSMUSG00000110711 | 9,63E-02  | 1,245606428  | 2,53E-01  | 6,15E-01 | 8,54E-01 | Gm45760        | 1,07 | No  |
| ENSMUSG00000110715 | 7,83E-02  | 3,316806894  | 5,54E-01  | 4,57E-01 | 7,46E-01 | Gm5131         | 1,06 | No  |
| ENSMUSG00000110716 | -2,71E+00 | -2,997995711 | 2,91E+00  | 8,82E-02 | 3,79E-01 | Gm39271        | 0,15 | No  |
| ENSMUSG00000110720 | 4,62E-01  | -1,088867603 | 8,34E-01  | 3,61E-01 | 6,62E-01 | AC153954.1     | 1,38 | No  |
| ENSMUSG00000110726 | 2,06E-02  | 3,266582146  | 3,76E-02  | 8,46E-01 | 9,87E-01 | AC118476.1     | 1,01 | No  |
| ENSMUSG00000110730 | -2,89E-01 | -2,070174456 | 1,45E-01  | 7,03E-01 | 9,06E-01 | AC118476.2     | 0,82 | No  |
| ENSMUSG00000110735 | 6,89E-01  | -2,472962847 | 4,72E-01  | 4,92E-01 | 7,78E-01 | AC132852.1     | 1,61 | No  |
| ENSMUSG00000110737 | -4,16E-02 | -2,600674057 | 1,92E-03  | 9,65E-01 | 1,00E+00 | AC158630.1     | 0,97 | No  |
| ENSMUSG00000110738 | -5,74E-01 | -2,770637017 | 2,59E-01  | 6,11E-01 | 8,52E-01 | AC115863.1     | 0,67 | No  |
| ENSMUSG00000110740 | -1,97E-01 | -1,74093027  | 1,17E-01  | 7,32E-01 | 9,22E-01 | AC122428.1     | 0,87 | No  |
| ENSMUSG00000110744 | -1,30E-01 | 4,426358005  | 2,56E+00  | 1,09E-01 | 4,06E-01 | AC125532.1     | 0,91 | No  |
| ENSMUSG00000110747 | 1,26E+00  | -2,770600402 | 9,80E-01  | 3,22E-01 | 6,22E-01 | AC156031.1     | 2,39 | No  |
| ENSMUSG00000110750 | 6,92E-01  | -2,311246023 | 6,95E-01  | 4,04E-01 | 7,02E-01 | AC142113.1     | 1,62 | No  |
| ENSMUSG00000110751 | -6,83E-01 | -2,033519926 | 7,93E-01  | 3,73E-01 | 6,74E-01 | AC163350.1     | 0,62 | No  |
| ENSMUSG00000110752 | 2,47E-01  | -2,355572823 | 7,69E-02  | 7,81E-01 | 9,49E-01 | AC133192.1     | 1,19 | No  |
| ENSMUSG00000110753 | 2,60E-01  | -2,107555093 | 8,44E-02  | 7,71E-01 | 9,43E-01 | AC127596.1     | 1,20 | No  |
| ENSMUSG00000110759 | 1,85E+00  | -3,107657832 | 1,35E+00  | 2,46E-01 | 5,50E-01 | AC159308.2     | 3,61 | No  |
| ENSMUSG00000110761 | -3,17E+00 | -2,896113652 | 4,22E+00  | 4,00E-02 | 2,37E-01 | AC171206.1     | 0,11 | No  |
| ENSMUSG00000110765 | -3,83E-02 | -3,107651936 | -7,91E-11 | 1,00E+00 | 1,00E+00 | AC156633.1     | 0,97 | No  |
| ENSMUSG00000110768 | 6,99E-02  | 5,488329524  | 1,02E+00  | 3,14E-01 | 6,14E-01 | AC160337.1     | 1,05 | No  |
| ENSMUSG00000110770 | -5,88E-02 | -3,033616507 | 1,62E-03  | 9,68E-01 | 1,00E+00 | AC158622.1     | 0,96 | No  |
| ENSMUSG00000110772 | -7,46E-01 | -2,289471699 | 1,04E+00  | 3,08E-01 | 6,06E-01 | AC152922.1     | 0,60 | No  |
| ENSMUSG00000110773 | -1,42E-01 | -0,384045287 | 1,98E-01  | 6,57E-01 | 8,80E-01 | AC061963.1     | 0,91 | No  |
| ENSMUSG00000110774 | 3,39E-01  | 0,972927083  | 2,65E+00  | 1,03E-01 | 3,95E-01 | AC140448.1     | 1,27 | No  |
| ENSMUSG00000110779 | -3,55E-01 | -1,831962717 | 3,22E-01  | 5,71E-01 | 8,31E-01 | AC116726.1     | 0,78 | No  |
| ENSMUSG00000110786 | -3,83E-02 | -3,107651936 | -7,91E-11 | 1,00E+00 | 1,00E+00 | AC154307.1     | 0,97 | No  |
| ENSMUSG00000110790 | -6,32E-02 | 4,751720276  | 6,95E-01  | 4,04E-01 | 7,01E-01 | AC159314.1     | 0,96 | No  |
| ENSMUSG00000110791 | 7,33E-01  | -1,378506168 | 1,96E+00  | 1,61E-01 | 5,10E-01 | AC113059.1     | 1,66 | No  |
| ENSMUSG00000110795 | -8,20E-01 | -2,311125229 | 9,81E-01  | 3,22E-01 | 6,22E-01 | CAAA01216754.1 | 0,57 | No  |
| ENSMUSG00000110803 | -4,31E-01 | -0,121943021 | 1,92E+00  | 1,66E-01 | 5,19E-01 | AC156795.1     | 0,74 | No  |



|                    |           |              |          |          |          |                |      |     |
|--------------------|-----------|--------------|----------|----------|----------|----------------|------|-----|
| ENSMUSG00000110808 | -1,66E-01 | -0,333264336 | 2,06E-01 | 6,50E-01 | 8,76E-01 | AC162938.1     | 0,89 | No  |
| ENSMUSG00000110814 | 8,87E-01  | -2,033643712 | 1,47E+00 | 2,25E-01 | 5,50E-01 | AC131660.1     | 1,85 | No  |
| ENSMUSG00000110816 | -5,40E-02 | 0,351804493  | 4,23E-02 | 8,37E-01 | 9,81E-01 | AC154699.1     | 0,96 | No  |
| ENSMUSG00000110822 | -4,28E-01 | -0,473005886 | 1,58E+00 | 2,09E-01 | 5,50E-01 | AC122332.1     | 0,74 | No  |
| ENSMUSG00000110824 | -1,37E+00 | -2,226192976 | 2,57E+00 | 1,09E-01 | 4,05E-01 | AC133947.1     | 0,39 | No  |
| ENSMUSG00000110825 | 1,74E-01  | -2,268154926 | 4,51E-02 | 8,32E-01 | 9,78E-01 | CT030181.1     | 1,13 | No  |
| ENSMUSG00000110830 | -1,27E-01 | -0,283990944 | 1,52E-01 | 6,97E-01 | 9,03E-01 | AC153912.2     | 0,92 | No  |
| ENSMUSG00000110834 | 4,22E-01  | -0,015949776 | 2,37E+00 | 1,24E-01 | 4,40E-01 | CAAA01180111.2 | 1,34 | No  |
| ENSMUSG00000110835 | -1,94E+00 | -3,107619243 | 1,50E+00 | 2,21E-01 | 5,50E-01 | AC153862.1     | 0,26 | No  |
| ENSMUSG00000110837 | -1,73E+00 | -2,7705757   | 2,08E+00 | 1,49E-01 | 4,90E-01 | AC121927.1     | 0,30 | No  |
| ENSMUSG00000110841 | -1,77E-01 | 7,949794627  | 9,21E+00 | 2,41E-03 | 3,25E-02 | AC153368.1     | 0,88 | Yes |
| ENSMUSG00000110847 | -1,41E-01 | 2,384763893  | 1,08E+00 | 3,00E-01 | 5,96E-01 | AC142407.1     | 0,91 | No  |
| ENSMUSG00000110854 | 6,31E-02  | -1,879804816 | 1,02E-02 | 9,20E-01 | 1,00E+00 | AC157476.1     | 1,04 | No  |
| ENSMUSG00000110863 | -1,38E+00 | -1,963243876 | 2,61E+00 | 1,06E-01 | 3,99E-01 | AC163350.2     | 0,38 | No  |
| ENSMUSG00000110864 | 4,80E-01  | 0,070490519  | 2,75E+00 | 9,71E-02 | 3,89E-01 | AC164105.2     | 1,39 | No  |
| ENSMUSG00000110866 | 5,60E-02  | 2,696586304  | 2,08E-01 | 6,48E-01 | 8,75E-01 | AC141438.1     | 1,04 | No  |
| ENSMUSG00000110867 | -1,01E-01 | 2,85414798   | 7,38E-01 | 3,90E-01 | 6,91E-01 | AC157591.1     | 0,93 | No  |
| ENSMUSG00000110869 | 3,30E-01  | -1,78573645  | 2,89E-01 | 5,91E-01 | 8,41E-01 | AC122901.1     | 1,26 | No  |
| ENSMUSG00000110873 | -1,90E+00 | -3,033647263 | 1,44E+00 | 2,30E-01 | 5,50E-01 | AC093926.1     | 0,27 | No  |
| ENSMUSG00000110874 | 1,87E+00  | -3,107639691 | 1,38E+00 | 2,40E-01 | 5,50E-01 | AC121988.1     | 3,67 | No  |
| ENSMUSG00000110880 | -6,48E-02 | -2,963249916 | 1,90E-03 | 9,65E-01 | 1,00E+00 | AC159896.2     | 0,96 | No  |
| ENSMUSG00000110882 | -5,74E-01 | -1,165521546 | 1,56E+00 | 2,12E-01 | 5,50E-01 | AC155249.1     | 0,67 | No  |
| ENSMUSG00000110887 | -7,08E-01 | -0,755629292 | 3,48E+00 | 6,20E-02 | 3,10E-01 | AL603630.1     | 0,61 | No  |
| ENSMUSG00000110888 | -1,93E+00 | -2,963244023 | 1,47E+00 | 2,25E-01 | 5,50E-01 | AC126257.1     | 0,26 | No  |
| ENSMUSG00000110894 | -7,26E-01 | -2,497599617 | 5,90E-01 | 4,42E-01 | 7,34E-01 | AC153971.1     | 0,60 | No  |
| ENSMUSG00000110895 | -1,42E+00 | -2,831965226 | 1,27E+00 | 2,60E-01 | 5,53E-01 | AC123832.1     | 0,37 | No  |
| ENSMUSG00000110896 | -6,44E-01 | -2,522683171 | 3,95E-01 | 5,30E-01 | 8,05E-01 | AC116726.2     | 0,64 | No  |
| ENSMUSG00000110897 | -1,89E+00 | -3,1076441   | 1,42E+00 | 2,33E-01 | 5,50E-01 | AC073947.1     | 0,27 | No  |
| ENSMUSG00000110899 | -1,60E+00 | 1,268756084  | 6,98E+01 | 6,44E-17 | 1,16E-14 | AC122305.1     | 0,33 | Yes |
| ENSMUSG00000110902 | -1,57E+00 | -1,165518497 | 9,42E+00 | 2,15E-03 | 2,96E-02 | AC153862.2     | 0,34 | Yes |
| ENSMUSG00000110903 | -3,91E-01 | -2,268106732 | 1,92E-01 | 6,61E-01 | 8,82E-01 | AC152922.2     | 0,76 | No  |
| ENSMUSG00000110908 | 1,87E+00  | -3,107639691 | 1,38E+00 | 2,40E-01 | 5,50E-01 | AL603745.1     | 3,67 | No  |

|                    |           |              |           |          |          |            |      |     |
|--------------------|-----------|--------------|-----------|----------|----------|------------|------|-----|
| ENSMUSG00000110910 | -8,86E-02 | -2,963249454 | 3,57E-03  | 9,52E-01 | 1,00E+00 | AC166098.1 | 0,94 | No  |
| ENSMUSG00000110913 | 3,14E-02  | -3,107617333 | -7,69E-10 | 1,00E+00 | 1,00E+00 | AC114645.1 | 1,02 | No  |
| ENSMUSG00000110914 | -3,13E-01 | -1,205857363 | 4,24E-01  | 5,15E-01 | 7,96E-01 | AC156031.2 | 0,80 | No  |
| ENSMUSG00000110915 | -5,12E-01 | -2,711734195 | 1,31E-01  | 7,17E-01 | 9,13E-01 | AC122525.1 | 0,70 | No  |
| ENSMUSG00000110916 | 1,87E+00  | -3,107639691 | 1,38E+00  | 2,40E-01 | 5,50E-01 | AC160997.1 | 3,67 | No  |
| ENSMUSG00000110922 | 1,20E+00  | -3,107637352 | 6,66E-01  | 4,15E-01 | 7,10E-01 | AC242690.1 | 2,29 | No  |
| ENSMUSG00000110926 | -2,50E-01 | 2,454305628  | 3,64E+00  | 5,63E-02 | 2,91E-01 | AC116699.1 | 0,84 | No  |
| ENSMUSG00000110928 | -9,85E-01 | -2,107669228 | 1,50E+00  | 2,21E-01 | 5,50E-01 | AC132474.1 | 0,51 | No  |
| ENSMUSG00000110930 | 1,85E+00  | -3,070185425 | 1,35E+00  | 2,46E-01 | 5,50E-01 | AC126257.2 | 3,62 | No  |
| ENSMUSG00000110932 | 4,21E-01  | 1,458009441  | 5,13E+00  | 2,35E-02 | 1,68E-01 | AC168266.1 | 1,34 | No  |
| ENSMUSG00000110935 | -1,54E-01 | 2,56484488   | 1,49E+00  | 2,22E-01 | 5,50E-01 | AC138292.1 | 0,90 | No  |
| ENSMUSG00000110938 | 1,85E+00  | -3,107657832 | 1,35E+00  | 2,46E-01 | 5,50E-01 | AC158622.2 | 3,61 | No  |
| ENSMUSG00000110945 | -2,64E-01 | -0,038043613 | 8,27E-01  | 3,63E-01 | 6,64E-01 | AC133650.1 | 0,83 | No  |
| ENSMUSG00000110949 | 7,34E-02  | 2,365665667  | 2,93E-01  | 5,89E-01 | 8,41E-01 | Nudt8      | 1,05 | No  |
| ENSMUSG00000110959 | -1,89E+00 | -3,1076441   | 1,42E+00  | 2,33E-01 | 5,50E-01 | AC122426.1 | 0,27 | No  |
| ENSMUSG00000110960 | -3,23E-01 | 4,706062209  | 1,76E+01  | 2,70E-05 | 8,02E-04 | AC153729.2 | 0,80 | Yes |
| ENSMUSG00000110962 | 5,71E-02  | -1,627617286 | 8,74E-03  | 9,26E-01 | 1,00E+00 | AC137127.2 | 1,04 | No  |
| ENSMUSG00000110964 | -8,70E-01 | -2,896167824 | 4,16E-01  | 5,19E-01 | 7,98E-01 | CT025680.3 | 0,55 | No  |
| ENSMUSG00000110966 | -3,93E-01 | -2,401390222 | 1,76E-01  | 6,75E-01 | 8,91E-01 | AC124577.1 | 0,76 | No  |
| ENSMUSG00000110972 | -5,66E-01 | -1,522597626 | 9,25E-01  | 3,36E-01 | 6,37E-01 | AC124577.2 | 0,68 | No  |
| ENSMUSG00000110980 | -8,94E-02 | -0,289330966 | 7,27E-02  | 7,87E-01 | 9,53E-01 | AC122428.2 | 0,94 | No  |
| ENSMUSG00000110983 | -9,80E-02 | 0,3993841    | 1,42E-01  | 7,07E-01 | 9,08E-01 | AC162387.1 | 0,93 | No  |
| ENSMUSG00000110989 | -6,04E-01 | -2,2470492   | 4,97E-01  | 4,81E-01 | 7,69E-01 | AC107819.2 | 0,66 | No  |
| ENSMUSG00000110993 | -8,34E-01 | 0,331129293  | 8,53E+00  | 3,50E-03 | 4,29E-02 | AC105958.1 | 0,56 | Yes |
| ENSMUSG00000110996 | -5,69E-01 | -2,600631872 | 2,54E-01  | 6,14E-01 | 8,53E-01 | AC161590.1 | 0,67 | No  |
| ENSMUSG00000110997 | -3,17E-02 | -0,600552591 | 7,14E-03  | 9,33E-01 | 1,00E+00 | AC126804.1 | 0,98 | No  |
| ENSMUSG00000110998 | 1,85E+00  | -3,107657832 | 1,35E+00  | 2,46E-01 | 5,50E-01 | AC160394.1 | 3,61 | No  |
| ENSMUSG00000111001 | 1,59E-01  | 3,311994912  | 2,37E+00  | 1,24E-01 | 4,40E-01 | AC159475.1 | 1,12 | No  |
| ENSMUSG00000111003 | -9,17E-01 | -2,770585831 | 7,33E-01  | 3,92E-01 | 6,92E-01 | AC120394.1 | 0,53 | No  |
| ENSMUSG00000111004 | -1,47E-01 | 0,34501716   | 2,78E-01  | 5,98E-01 | 8,45E-01 | CT025561.1 | 0,90 | No  |
| ENSMUSG00000111006 | -8,31E-01 | -2,832007114 | 3,79E-01  | 5,38E-01 | 8,09E-01 | AC117639.1 | 0,56 | No  |
| ENSMUSG00000111012 | 4,15E-02  | 3,485876307  | 1,76E-01  | 6,75E-01 | 8,91E-01 | CT010488.1 | 1,03 | No  |

|                    |           |              |           |          |          |            |      |    |
|--------------------|-----------|--------------|-----------|----------|----------|------------|------|----|
| ENSMUSG00000111013 | 1,81E+00  | -3,10765737  | 1,28E+00  | 2,58E-01 | 5,50E-01 | AC122326.1 | 3,49 | No |
| ENSMUSG00000111014 | 1,62E-03  | -2,963242114 | -1,56E-12 | 1,00E+00 | 1,00E+00 | AC160124.1 | 1,00 | No |
| ENSMUSG00000111016 | 1,79E+00  | -3,033666867 | 1,28E+00  | 2,58E-01 | 5,50E-01 | AL669916.2 | 3,46 | No |
| ENSMUSG00000111017 | -3,99E-01 | -1,107354065 | 7,94E-01  | 3,73E-01 | 6,74E-01 | AC061963.2 | 0,76 | No |
| ENSMUSG00000111019 | 9,01E-03  | -3,107646452 | -5,16E-10 | 1,00E+00 | 1,00E+00 | AC103936.1 | 1,01 | No |
| ENSMUSG00000111027 | 8,77E-02  | 5,053960529  | 1,42E+00  | 2,34E-01 | 5,50E-01 | CT033761.1 | 1,06 | No |
| ENSMUSG00000111028 | 1,77E-01  | -2,355561141 | 4,70E-02  | 8,28E-01 | 9,76E-01 | AC110091.1 | 1,13 | No |
| ENSMUSG00000111030 | -6,52E-03 | 0,956653941  | 9,40E-04  | 9,76E-01 | 1,00E+00 | AC151971.3 | 1,00 | No |
| ENSMUSG00000111033 | -2,66E+00 | -2,9632547   | 2,82E+00  | 9,28E-02 | 3,83E-01 | AC126672.1 | 0,16 | No |
| ENSMUSG00000111034 | 2,62E-01  | -0,641173471 | 4,83E-01  | 4,87E-01 | 7,74E-01 | AC153955.1 | 1,20 | No |
| ENSMUSG00000111035 | 9,01E-03  | -3,107646452 | -5,16E-10 | 1,00E+00 | 1,00E+00 | AC138739.1 | 1,01 | No |
| ENSMUSG00000111039 | 3,12E-01  | -2,378272503 | 1,39E-01  | 7,09E-01 | 9,09E-01 | AC145736.1 | 1,24 | No |
| ENSMUSG00000111044 | 1,45E-01  | -2,363728032 | 3,04E-02  | 8,62E-01 | 9,96E-01 | AC117688.1 | 1,11 | No |
| ENSMUSG00000111045 | -1,87E+00 | -3,107637761 | 1,39E+00  | 2,38E-01 | 5,50E-01 | AC164625.1 | 0,27 | No |
| ENSMUSG00000111047 | -7,71E-01 | -0,896155321 | 3,71E+00  | 5,40E-02 | 2,84E-01 | AC156389.1 | 0,59 | No |
| ENSMUSG00000111052 | -4,14E-01 | -2,033646476 | 3,56E-01  | 5,51E-01 | 8,17E-01 | AC158622.3 | 0,75 | No |
| ENSMUSG00000111053 | -5,14E-01 | -0,929269108 | 1,57E+00  | 2,10E-01 | 5,50E-01 | AC164092.2 | 0,70 | No |
| ENSMUSG00000111055 | -8,68E-03 | -2,831934011 | 8,62E-05  | 9,93E-01 | 1,00E+00 | AC153958.1 | 0,99 | No |
| ENSMUSG00000111058 | 9,01E-03  | -3,107646452 | -5,16E-10 | 1,00E+00 | 1,00E+00 | AC135672.1 | 1,01 | No |
| ENSMUSG00000111063 | 1,27E+00  | -2,832014932 | 9,96E-01  | 3,18E-01 | 6,19E-01 | AC125374.1 | 2,41 | No |
| ENSMUSG00000111067 | -1,52E-01 | 0,274007606  | 3,04E-01  | 5,81E-01 | 8,37E-01 | AC171277.1 | 0,90 | No |
| ENSMUSG00000111068 | -8,80E-02 | -2,896116238 | 3,33E-03  | 9,54E-01 | 1,00E+00 | AC124778.1 | 0,94 | No |
| ENSMUSG00000111069 | -7,83E-02 | -2,448665965 | 7,03E-03  | 9,33E-01 | 1,00E+00 | AC093926.2 | 0,95 | No |
| ENSMUSG00000111070 | -3,59E-01 | -1,89615336  | 2,99E-01  | 5,85E-01 | 8,38E-01 | AC122305.2 | 0,78 | No |
| ENSMUSG00000111074 | -1,46E+00 | -2,497556572 | 2,21E+00  | 1,37E-01 | 4,68E-01 | AC160051.1 | 0,36 | No |
| ENSMUSG00000111077 | 1,85E+00  | -3,107657832 | 1,35E+00  | 2,46E-01 | 5,50E-01 | AC153566.1 | 3,61 | No |
| ENSMUSG00000111078 | -5,99E-02 | -2,963282181 | -7,02E-11 | 1,00E+00 | 1,00E+00 | AC027700.1 | 0,96 | No |
| ENSMUSG00000111079 | 3,89E-01  | -0,226312021 | 1,40E+00  | 2,37E-01 | 5,50E-01 | AC165080.2 | 1,31 | No |
| ENSMUSG00000111080 | -8,62E-02 | 2,778761991  | 5,26E-01  | 4,68E-01 | 7,57E-01 | AC153899.1 | 0,94 | No |
| ENSMUSG00000111082 | 1,59E-01  | 1,686024579  | 8,59E-01  | 3,54E-01 | 6,55E-01 | AC061963.3 | 1,12 | No |
| ENSMUSG00000111083 | 1,58E-01  | -1,801077996 | 6,97E-02  | 7,92E-01 | 9,55E-01 | AC153954.2 | 1,12 | No |
| ENSMUSG00000111086 | -1,29E+00 | -3,070165927 | 7,49E-01  | 3,87E-01 | 6,87E-01 | AC125206.1 | 0,41 | No |

|                    |           |              |           |          |          |            |      |     |
|--------------------|-----------|--------------|-----------|----------|----------|------------|------|-----|
| ENSMUSG00000111087 | -2,75E+00 | -2,963216826 | 2,99E+00  | 8,38E-02 | 3,71E-01 | AC123835.1 | 0,15 | No  |
| ENSMUSG00000111088 | -1,47E-01 | -1,226394229 | 1,03E-01  | 7,48E-01 | 9,30E-01 | AC122428.3 | 0,90 | No  |
| ENSMUSG00000111089 | 3,14E-02  | -3,107617333 | -7,69E-10 | 1,00E+00 | 1,00E+00 | AC117245.1 | 1,02 | No  |
| ENSMUSG00000111090 | -5,30E-01 | -1,980585387 | 6,47E-01  | 4,21E-01 | 7,17E-01 | AC153912.3 | 0,69 | No  |
| ENSMUSG00000111091 | -2,63E-02 | -3,033653157 | 2,33E-04  | 9,88E-01 | 1,00E+00 | AC153897.1 | 0,98 | No  |
| ENSMUSG00000111092 | -4,25E-01 | -2,424843888 | 1,85E-01  | 6,67E-01 | 8,86E-01 | AC114645.2 | 0,74 | No  |
| ENSMUSG00000111094 | -5,55E-02 | -2,205766019 | 5,68E-03  | 9,40E-01 | 1,00E+00 | AC145731.1 | 0,96 | No  |
| ENSMUSG00000111097 | -3,56E+00 | -2,896109226 | 5,70E+00  | 1,70E-02 | 1,36E-01 | AC154264.1 | 0,08 | No  |
| ENSMUSG00000111104 | 4,03E-01  | 0,251684432  | 2,36E+00  | 1,25E-01 | 4,42E-01 | AC151843.2 | 1,32 | No  |
| ENSMUSG00000111108 | -7,78E-01 | -0,66891041  | 4,85E+00  | 2,76E-02 | 1,87E-01 | AC157652.1 | 0,58 | No  |
| ENSMUSG00000111116 | 3,24E-01  | 1,028351999  | 2,37E+00  | 1,24E-01 | 4,40E-01 | AC153955.2 | 1,25 | No  |
| ENSMUSG00000111118 | -3,28E-01 | -0,86361485  | 6,87E-01  | 4,07E-01 | 7,04E-01 | AC151730.1 | 0,80 | No  |
| ENSMUSG00000111119 | 5,19E-01  | -1,126653853 | 1,14E+00  | 2,85E-01 | 5,82E-01 | AC079245.2 | 1,43 | No  |
| ENSMUSG00000111128 | 6,99E-02  | 2,949325101  | 3,82E-01  | 5,36E-01 | 8,08E-01 | AC126804.2 | 1,05 | No  |
| ENSMUSG00000111131 | -2,96E-01 | -0,87978313  | 4,19E-01  | 5,18E-01 | 7,98E-01 | AC115297.1 | 0,81 | No  |
| ENSMUSG00000111132 | -4,65E-01 | -1,165791469 | 1,04E+00  | 3,07E-01 | 6,05E-01 | AC154296.2 | 0,72 | No  |
| ENSMUSG00000111133 | -2,42E-01 | 4,359210905  | 8,66E+00  | 3,25E-03 | 4,07E-02 | AC160123.2 | 0,85 | Yes |
| ENSMUSG00000111137 | 6,58E-01  | -1,378301747 | 1,67E+00  | 1,97E-01 | 5,50E-01 | AC160337.2 | 1,58 | No  |
| ENSMUSG00000111143 | -1,89E+00 | -3,1076441   | 1,42E+00  | 2,33E-01 | 5,50E-01 | AC164612.1 | 0,27 | No  |
| ENSMUSG00000111146 | -7,94E-01 | -2,896102912 | 3,44E-01  | 5,57E-01 | 8,21E-01 | AC108846.3 | 0,58 | No  |
| ENSMUSG00000111147 | 1,33E-01  | 0,266356492  | 2,53E-01  | 6,15E-01 | 8,54E-01 | AC160562.1 | 1,10 | No  |
| ENSMUSG00000111148 | 7,74E-02  | 2,122150341  | 2,77E-01  | 5,99E-01 | 8,46E-01 | AC242682.1 | 1,06 | No  |
| ENSMUSG00000111151 | -9,05E-02 | 3,528490211  | 8,26E-01  | 3,63E-01 | 6,65E-01 | AC138616.1 | 0,94 | No  |
| ENSMUSG00000111157 | -1,87E+00 | -3,107637761 | 1,39E+00  | 2,38E-01 | 5,50E-01 | AC156832.3 | 0,27 | No  |
| ENSMUSG00000111160 | -7,68E-01 | -1,355521407 | 1,74E+00  | 1,87E-01 | 5,50E-01 | AC160118.1 | 0,59 | No  |
| ENSMUSG00000111161 | -8,28E-02 | -2,600615528 | 6,23E-03  | 9,37E-01 | 1,00E+00 | AC100406.1 | 0,94 | No  |
| ENSMUSG00000111162 | -1,16E+00 | -1,333045739 | 5,27E+00  | 2,17E-02 | 1,59E-01 | CT030181.2 | 0,45 | No  |
| ENSMUSG00000111163 | -6,64E-01 | -1,355517817 | 1,69E+00  | 1,93E-01 | 5,50E-01 | AC125374.2 | 0,63 | No  |
| ENSMUSG00000111165 | -4,25E-01 | -2,600643823 | 1,84E-01  | 6,68E-01 | 8,86E-01 | AC153569.1 | 0,74 | No  |
| ENSMUSG00000111167 | 7,45E-01  | -2,185701086 | 9,90E-01  | 3,20E-01 | 6,20E-01 | AC160051.2 | 1,68 | No  |
| ENSMUSG00000111168 | -1,89E+00 | -3,1076441   | 1,42E+00  | 2,33E-01 | 5,50E-01 | AL669916.4 | 0,27 | No  |
| ENSMUSG00000111171 | 3,56E-02  | 5,017179887  | 2,32E-01  | 6,30E-01 | 8,63E-01 | AC112265.1 | 1,02 | No  |

|                    |           |              |           |          |          |                |      |     |
|--------------------|-----------|--------------|-----------|----------|----------|----------------|------|-----|
| ENSMUSG00000111172 | -8,22E-01 | -2,896156472 | 3,70E-01  | 5,43E-01 | 8,12E-01 | AC122525.2     | 0,57 | No  |
| ENSMUSG00000111177 | -7,98E-01 | -2,963241606 | 3,44E-01  | 5,57E-01 | 8,21E-01 | AC153897.2     | 0,58 | No  |
| ENSMUSG00000111180 | 6,23E-01  | -3,033657502 | 1,55E-01  | 6,94E-01 | 9,02E-01 | AC160394.3     | 1,54 | No  |
| ENSMUSG00000111181 | 2,15E-02  | -0,485358121 | 4,53E-03  | 9,46E-01 | 1,00E+00 | AC167017.1     | 1,02 | No  |
| ENSMUSG00000111184 | 1,20E-01  | -0,062641058 | 1,52E-01  | 6,97E-01 | 9,03E-01 | AC163703.1     | 1,09 | No  |
| ENSMUSG00000111186 | 1,81E+00  | -3,10765737  | 1,28E+00  | 2,58E-01 | 5,50E-01 | AC162176.1     | 3,49 | No  |
| ENSMUSG00000111187 | 3,92E-01  | 2,566717861  | 9,29E+00  | 2,31E-03 | 3,14E-02 | AC132392.1     | 1,31 | Yes |
| ENSMUSG00000111189 | -1,00E-01 | -0,929291185 | 5,68E-02  | 8,12E-01 | 9,67E-01 | AC140409.2     | 0,93 | No  |
| ENSMUSG00000111191 | 7,57E-01  | -1,963071286 | 1,02E+00  | 3,12E-01 | 6,12E-01 | AC132615.2     | 1,69 | No  |
| ENSMUSG00000111192 | -1,89E+00 | -3,1076441   | 1,42E+00  | 2,33E-01 | 5,50E-01 | AC108846.4     | 0,27 | No  |
| ENSMUSG00000111194 | 7,25E-01  | -2,770588035 | 2,87E-01  | 5,92E-01 | 8,42E-01 | CAAA01216754.4 | 1,65 | No  |
| ENSMUSG00000111197 | 1,91E-03  | 2,938856194  | 2,74E-04  | 9,87E-01 | 1,00E+00 | AC055818.1     | 1,00 | No  |
| ENSMUSG00000111202 | 6,89E-01  | -0,912521961 | 2,57E+00  | 1,09E-01 | 4,05E-01 | AC153954.3     | 1,61 | No  |
| ENSMUSG00000111203 | -5,05E-01 | -2,929294643 | 1,29E-01  | 7,20E-01 | 9,15E-01 | AC122305.3     | 0,70 | No  |
| ENSMUSG00000111204 | 1,81E+00  | -3,10765737  | 1,28E+00  | 2,58E-01 | 5,50E-01 | AC166052.1     | 3,49 | No  |
| ENSMUSG00000111205 | -4,44E-01 | -2,49762008  | 2,02E-01  | 6,53E-01 | 8,78E-01 | AC159308.3     | 0,73 | No  |
| ENSMUSG00000111209 | -3,57E+00 | -2,655078662 | 5,75E+00  | 1,65E-02 | 1,34E-01 | AC102350.1     | 0,08 | No  |
| ENSMUSG00000111211 | -3,23E+00 | -2,770553271 | 4,38E+00  | 3,64E-02 | 2,27E-01 | AC153899.2     | 0,11 | No  |
| ENSMUSG00000111212 | 8,90E-02  | -0,424727644 | 6,98E-02  | 7,92E-01 | 9,55E-01 | CAAA01194877.1 | 1,06 | No  |
| ENSMUSG00000111218 | -1,54E+00 | -2,146111763 | 3,45E+00  | 6,33E-02 | 3,14E-01 | AC145736.2     | 0,34 | No  |
| ENSMUSG00000111223 | -3,04E-02 | -2,896158823 | 4,66E-04  | 9,83E-01 | 1,00E+00 | AC241616.1     | 0,98 | No  |
| ENSMUSG00000111224 | -1,89E-01 | -0,316524745 | 3,43E-01  | 5,58E-01 | 8,22E-01 | AC153863.2     | 0,88 | No  |
| ENSMUSG00000111227 | -2,17E+00 | -2,26809756  | 6,09E+00  | 1,36E-02 | 1,17E-01 | AC117639.2     | 0,22 | No  |
| ENSMUSG00000111228 | 2,39E+00  | -2,548217825 | 4,86E+00  | 2,74E-02 | 1,87E-01 | AC123832.2     | 5,23 | No  |
| ENSMUSG00000111229 | 2,96E-01  | -2,655172721 | 8,88E-02  | 7,66E-01 | 9,40E-01 | AC126459.2     | 1,23 | No  |
| ENSMUSG00000111241 | 1,38E-01  | -0,763031611 | 1,15E-01  | 7,35E-01 | 9,24E-01 | AC061963.4     | 1,10 | No  |
| ENSMUSG00000111242 | 2,46E-01  | 0,768481562  | 1,24E+00  | 2,66E-01 | 5,62E-01 | AC168222.2     | 1,19 | No  |
| ENSMUSG00000111243 | -1,14E-02 | -3,033635021 | 1,50E-05  | 9,97E-01 | 1,00E+00 | AC131777.1     | 0,99 | No  |
| ENSMUSG00000111246 | -8,82E-01 | -1,448531321 | 2,50E+00  | 1,14E-01 | 4,17E-01 | CT025678.1     | 0,54 | No  |
| ENSMUSG00000111250 | -1,89E+00 | -3,1076441   | 1,42E+00  | 2,33E-01 | 5,50E-01 | AC159886.2     | 0,27 | No  |
| ENSMUSG00000111251 | 3,61E-02  | 0,742373334  | 2,41E-02  | 8,77E-01 | 1,00E+00 | AC157652.2     | 1,03 | No  |
| ENSMUSG00000111254 | -3,83E-02 | -3,107651936 | -7,91E-11 | 1,00E+00 | 1,00E+00 | AC164087.2     | 0,97 | No  |

|                    |           |              |           |          |          |            |      |     |
|--------------------|-----------|--------------|-----------|----------|----------|------------|------|-----|
| ENSMUSG00000111256 | -4,03E-01 | 3,257839729  | 1,50E+01  | 1,08E-04 | 2,59E-03 | AC153729.4 | 0,76 | Yes |
| ENSMUSG00000111258 | -5,76E-01 | -2,770642866 | 2,60E-01  | 6,10E-01 | 8,51E-01 | AC134590.1 | 0,67 | No  |
| ENSMUSG00000111260 | 1,82E+00  | -3,033661385 | 1,31E+00  | 2,52E-01 | 5,50E-01 | CU024910.1 | 3,54 | No  |
| ENSMUSG00000111262 | 9,01E-03  | -3,107646452 | -5,16E-10 | 1,00E+00 | 1,00E+00 | AC154028.1 | 1,01 | No  |
| ENSMUSG00000111263 | 8,40E-01  | -2,448660869 | 6,14E-01  | 4,33E-01 | 7,27E-01 | AC154319.1 | 1,79 | No  |
| ENSMUSG00000111264 | -4,84E-01 | 4,19512875   | 3,18E+01  | 1,73E-08 | 1,13E-06 | AC151971.5 | 0,71 | Yes |
| ENSMUSG00000111268 | -5,39E-02 | -3,033630742 | 1,02E-03  | 9,75E-01 | 1,00E+00 | AC121264.1 | 0,96 | No  |
| ENSMUSG00000111271 | 3,80E-01  | -2,863714178 | 7,26E-02  | 7,88E-01 | 9,53E-01 | AC132474.2 | 1,30 | No  |
| ENSMUSG00000111272 | 1,51E-01  | -2,14602795  | 3,94E-02  | 8,43E-01 | 9,85E-01 | CT573422.1 | 1,11 | No  |
| ENSMUSG00000111274 | -3,83E-02 | -3,107651936 | -7,91E-11 | 1,00E+00 | 1,00E+00 | AC121793.1 | 0,97 | No  |
| ENSMUSG00000111278 | 3,14E-02  | -3,107617333 | -7,69E-10 | 1,00E+00 | 1,00E+00 | AC165256.1 | 1,02 | No  |
| ENSMUSG00000111280 | -3,20E+00 | -2,929274257 | 4,32E+00  | 3,78E-02 | 2,31E-01 | AC151971.6 | 0,11 | No  |
| ENSMUSG00000111283 | 1,87E+00  | -3,107639691 | 1,38E+00  | 2,40E-01 | 5,50E-01 | AC126459.3 | 3,67 | No  |
| ENSMUSG00000111290 | 3,19E-01  | -1,929316732 | 1,88E-01  | 6,65E-01 | 8,85E-01 | AC160562.2 | 1,25 | No  |
| ENSMUSG00000111291 | 4,05E-02  | 1,578275775  | 5,66E-02  | 8,12E-01 | 9,67E-01 | AC124577.3 | 1,03 | No  |
| ENSMUSG00000111292 | -1,85E-01 | -0,740960688 | 2,16E-01  | 6,42E-01 | 8,71E-01 | AC159308.4 | 0,88 | No  |
| ENSMUSG00000111293 | 3,11E+00  | -2,963280805 | 3,94E+00  | 4,72E-02 | 2,60E-01 | AC125206.2 | 8,63 | No  |
| ENSMUSG00000111294 | -1,89E+00 | -3,1076441   | 1,42E+00  | 2,33E-01 | 5,50E-01 | AC183268.1 | 0,27 | No  |
| ENSMUSG00000111300 | -1,87E+00 | -3,107637761 | 1,39E+00  | 2,38E-01 | 5,50E-01 | AC159462.1 | 0,27 | No  |
| ENSMUSG00000111301 | -1,33E+00 | -2,107487939 | 3,00E+00  | 8,30E-02 | 3,70E-01 | AC151971.7 | 0,40 | No  |
| ENSMUSG00000111312 | -2,16E-01 | 1,229521225  | 1,31E+00  | 2,52E-01 | 5,50E-01 | AC122428.4 | 0,86 | No  |
| ENSMUSG00000111313 | 4,31E-01  | -1,683174233 | 5,11E-01  | 4,75E-01 | 7,63E-01 | AC153562.2 | 1,35 | No  |
| ENSMUSG00000111317 | -4,00E-02 | 1,844355287  | 6,72E-02  | 7,96E-01 | 9,57E-01 | AC154994.2 | 0,97 | No  |
| ENSMUSG00000111318 | 1,28E+00  | -2,831978687 | 1,02E+00  | 3,13E-01 | 6,13E-01 | AC158630.2 | 2,43 | No  |
| ENSMUSG00000111323 | -6,93E-02 | -2,863742385 | 2,09E-03  | 9,64E-01 | 1,00E+00 | AC132474.3 | 0,95 | No  |
| ENSMUSG00000111324 | 1,82E+00  | -3,033661385 | 1,31E+00  | 2,52E-01 | 5,50E-01 | AC131777.2 | 3,54 | No  |
| ENSMUSG00000111325 | 6,72E-02  | -0,801180059 | 2,98E-02  | 8,63E-01 | 9,97E-01 | AC125374.3 | 1,05 | No  |
| ENSMUSG00000111327 | -1,88E+00 | -2,896153786 | 1,42E+00  | 2,33E-01 | 5,50E-01 | AC159896.3 | 0,27 | No  |
| ENSMUSG00000111329 | 1,88E-01  | 4,365531257  | 5,15E+00  | 2,32E-02 | 1,67E-01 | AC122273.1 | 1,14 | No  |
| ENSMUSG00000111333 | -1,27E+00 | -3,146104694 | 7,49E-01  | 3,87E-01 | 6,87E-01 | AC125206.3 | 0,42 | No  |
| ENSMUSG00000111334 | -9,12E-01 | -2,378290082 | 1,25E+00  | 2,64E-01 | 5,59E-01 | AC162938.3 | 0,53 | No  |
| ENSMUSG00000111336 | 6,82E-02  | 4,303701963  | 6,69E-01  | 4,13E-01 | 7,09E-01 | AC160338.2 | 1,05 | No  |

|                    |           |              |           |          |          |            |       |     |
|--------------------|-----------|--------------|-----------|----------|----------|------------|-------|-----|
| ENSMUSG00000111337 | 3,14E-02  | -3,107617333 | -7,69E-10 | 1,00E+00 | 1,00E+00 | AC156031.4 | 1,02  | No  |
| ENSMUSG00000111339 | -1,03E-02 | 4,588401034  | 1,70E-02  | 8,96E-01 | 1,00E+00 | AC139579.1 | 0,99  | No  |
| ENSMUSG00000111340 | -1,13E+00 | -2,33317085  | 1,40E+00  | 2,37E-01 | 5,50E-01 | AC132852.2 | 0,46  | No  |
| ENSMUSG00000111341 | 1,12E+00  | -2,401387403 | 1,18E+00  | 2,77E-01 | 5,73E-01 | AC165080.3 | 2,17  | No  |
| ENSMUSG00000111342 | 1,87E+00  | -3,107639691 | 1,38E+00  | 2,40E-01 | 5,50E-01 | AC153536.1 | 3,67  | No  |
| ENSMUSG00000111343 | -1,70E+00 | -2,448671397 | 2,01E+00  | 1,56E-01 | 5,01E-01 | AC159819.3 | 0,31  | No  |
| ENSMUSG00000111344 | 7,62E-01  | -2,832003564 | 3,15E-01  | 5,74E-01 | 8,34E-01 | AL669916.5 | 1,70  | No  |
| ENSMUSG00000111345 | -3,02E-01 | -0,060842139 | 9,56E-01  | 3,28E-01 | 6,29E-01 | AC142113.2 | 0,81  | No  |
| ENSMUSG00000111348 | -1,34E-01 | -1,070226163 | 9,59E-02  | 7,57E-01 | 9,35E-01 | AC133947.2 | 0,91  | No  |
| ENSMUSG00000111351 | 1,57E+00  | -2,146198622 | 2,70E+00  | 1,00E-01 | 3,92E-01 | AC153845.2 | 2,98  | No  |
| ENSMUSG00000111353 | -1,87E+00 | -3,107637761 | 1,39E+00  | 2,38E-01 | 5,50E-01 | AC155907.1 | 0,27  | No  |
| ENSMUSG00000111356 | -2,84E-01 | 7,472467861  | 2,30E+01  | 1,66E-06 | 6,93E-05 | AC158620.2 | 0,82  | Yes |
| ENSMUSG00000111357 | -1,87E+00 | -2,401394032 | 4,07E+00  | 4,36E-02 | 2,49E-01 | AC140363.1 | 0,27  | No  |
| ENSMUSG00000111358 | -7,15E-01 | -2,070166399 | 8,71E-01  | 3,51E-01 | 6,52E-01 | AC160403.1 | 0,61  | No  |
| ENSMUSG00000111361 | 4,11E-01  | -2,146137862 | 2,70E-01  | 6,03E-01 | 8,48E-01 | AC153959.1 | 1,33  | No  |
| ENSMUSG00000111362 | 1,55E-01  | -1,740817848 | 7,88E-02  | 7,79E-01 | 9,47E-01 | AC153955.3 | 1,11  | No  |
| ENSMUSG00000111364 | 9,01E-03  | -3,107646452 | -5,16E-10 | 1,00E+00 | 1,00E+00 | CT025751.1 | 1,01  | No  |
| ENSMUSG00000111365 | -4,13E-02 | -3,033659495 | 7,08E-04  | 9,79E-01 | 1,00E+00 | AC102554.1 | 0,97  | No  |
| ENSMUSG00000111369 | 1,87E+00  | -3,107639691 | 1,38E+00  | 2,40E-01 | 5,50E-01 | AC117245.2 | 3,67  | No  |
| ENSMUSG00000111371 | -3,75E-02 | 4,895539078  | 2,49E-01  | 6,18E-01 | 8,55E-01 | AC164123.1 | 0,97  | No  |
| ENSMUSG00000111375 | 2,09E-02  | 2,270960068  | 2,23E-02  | 8,81E-01 | 1,00E+00 | Btbd8      | 1,01  | No  |
| ENSMUSG00000111377 | -1,94E+00 | -3,107619243 | 1,50E+00  | 2,21E-01 | 5,50E-01 | AC153536.2 | 0,26  | No  |
| ENSMUSG00000111378 | 2,52E+00  | -2,185751171 | 9,40E+00  | 2,17E-03 | 2,99E-02 | AC151971.9 | 5,74  | Yes |
| ENSMUSG00000111379 | 5,50E-01  | 1,777596793  | 1,05E+01  | 1,19E-03 | 1,86E-02 | AC157476.2 | 1,46  | Yes |
| ENSMUSG00000111380 | -9,28E-03 | 3,692255361  | 9,53E-03  | 9,22E-01 | 1,00E+00 | AC125321.1 | 0,99  | No  |
| ENSMUSG00000111381 | -1,86E+00 | -3,033612668 | 1,39E+00  | 2,38E-01 | 5,50E-01 | AC140488.1 | 0,28  | No  |
| ENSMUSG00000111383 | -1,91E+00 | -2,896158411 | 1,45E+00  | 2,28E-01 | 5,50E-01 | AC159899.1 | 0,27  | No  |
| ENSMUSG00000111390 | 3,00E-01  | 1,673253319  | 3,07E+00  | 7,98E-02 | 3,62E-01 | CT025660.2 | 1,23  | No  |
| ENSMUSG00000111394 | 1,88E-01  | 6,439240663  | 8,90E+00  | 2,85E-03 | 3,68E-02 | AC160637.1 | 1,14  | Yes |
| ENSMUSG00000111398 | 3,77E+00  | -2,770677238 | 6,53E+00  | 1,06E-02 | 9,74E-02 | AC107851.2 | 13,63 | No  |
| ENSMUSG00000111403 | -1,27E+00 | -3,146104694 | 7,49E-01  | 3,87E-01 | 6,87E-01 | AC164105.4 | 0,42  | No  |
| ENSMUSG00000111404 | 1,38E-01  | -1,070199413 | 9,60E-02  | 7,57E-01 | 9,35E-01 | AC157085.2 | 1,10  | No  |

|                    |           |              |           |          |          |            |      |     |
|--------------------|-----------|--------------|-----------|----------|----------|------------|------|-----|
| ENSMUSG00000111409 | 1,65E-01  | 4,137600191  | 3,62E+00  | 5,71E-02 | 2,94E-01 | Rnf26      | 1,12 | No  |
| ENSMUSG00000111410 | -6,20E-01 | -0,121860623 | 4,24E+00  | 3,96E-02 | 2,36E-01 | AL670603.1 | 0,65 | No  |
| ENSMUSG00000111412 | -2,63E-02 | -3,033641358 | 2,33E-04  | 9,88E-01 | 1,00E+00 | AC107740.1 | 0,98 | No  |
| ENSMUSG00000111414 | -2,21E+00 | -2,863672512 | 2,72E+00  | 9,93E-02 | 3,92E-01 | AC125321.2 | 0,22 | No  |
| ENSMUSG00000111415 | -1,91E+00 | -3,070174436 | 1,45E+00  | 2,29E-01 | 5,50E-01 | AC148328.1 | 0,27 | No  |
| ENSMUSG00000111417 | 1,84E+00  | -2,71171497  | 1,33E+00  | 2,49E-01 | 5,50E-01 | AC158987.1 | 3,57 | No  |
| ENSMUSG00000111421 | -3,78E-01 | -2,497615692 | 1,80E-01  | 6,71E-01 | 8,89E-01 | AC138284.1 | 0,77 | No  |
| ENSMUSG00000111422 | -9,45E-01 | -2,770622942 | 7,81E-01  | 3,77E-01 | 6,78E-01 | AC153536.3 | 0,52 | No  |
| ENSMUSG00000111424 | 7,29E-02  | 0,087390914  | 6,18E-02  | 8,04E-01 | 9,62E-01 | AC159308.5 | 1,05 | No  |
| ENSMUSG00000111425 | 3,37E-01  | -0,196056608 | 1,20E+00  | 2,72E-01 | 5,69E-01 | AC107638.1 | 1,26 | No  |
| ENSMUSG00000111427 | -2,25E-01 | -0,088549953 | 5,54E-01  | 4,57E-01 | 7,46E-01 | AC166262.1 | 0,86 | No  |
| ENSMUSG00000111428 | -4,35E-01 | -1,863742788 | 4,72E-01  | 4,92E-01 | 7,78E-01 | AC125374.4 | 0,74 | No  |
| ENSMUSG00000111429 | -5,98E-01 | 1,591767848  | 1,28E+01  | 3,42E-04 | 6,75E-03 | AC098716.1 | 0,66 | Yes |
| ENSMUSG00000111432 | -4,38E-01 | -2,226251708 | 3,52E-01  | 5,53E-01 | 8,19E-01 | AC122335.1 | 0,74 | No  |
| ENSMUSG00000111434 | 1,89E+00  | -3,033614598 | 1,38E+00  | 2,40E-01 | 5,50E-01 | AC120394.2 | 3,70 | No  |
| ENSMUSG00000111436 | -1,89E+00 | -2,896130167 | 1,43E+00  | 2,31E-01 | 5,50E-01 | AC158598.1 | 0,27 | No  |
| ENSMUSG00000111439 | -1,89E+00 | -3,1076441   | 1,42E+00  | 2,33E-01 | 5,50E-01 | AC138284.2 | 0,27 | No  |
| ENSMUSG00000111442 | -2,91E-01 | -2,226279468 | 1,27E-01  | 7,21E-01 | 9,16E-01 | AC153971.2 | 0,82 | No  |
| ENSMUSG00000111444 | -1,94E+00 | -3,107619243 | 1,50E+00  | 2,21E-01 | 5,50E-01 | AC160562.3 | 0,26 | No  |
| ENSMUSG00000111445 | 2,06E-02  | -3,146103739 | -9,26E-10 | 1,00E+00 | 1,00E+00 | AC145731.2 | 1,01 | No  |
| ENSMUSG00000111446 | -1,08E-01 | 4,76694088   | 1,96E+00  | 1,62E-01 | 5,11E-01 | AC163623.1 | 0,93 | No  |
| ENSMUSG00000111447 | -1,08E+00 | -1,412955923 | 3,59E+00  | 5,82E-02 | 2,98E-01 | AC153845.3 | 0,47 | No  |
| ENSMUSG00000111448 | 9,01E-03  | -3,107646452 | -5,16E-10 | 1,00E+00 | 1,00E+00 | Olfr912    | 1,01 | No  |
| ENSMUSG00000111451 | -1,27E+00 | -3,146104694 | 7,49E-01  | 3,87E-01 | 6,87E-01 | CT485606.1 | 0,42 | No  |
| ENSMUSG00000111454 | 9,01E-03  | -3,107646452 | -5,16E-10 | 1,00E+00 | 1,00E+00 | Olfr998    | 1,01 | No  |
| ENSMUSG00000111463 | 1,67E+00  | -2,896167771 | 1,36E+00  | 2,43E-01 | 5,50E-01 | AC027700.2 | 3,18 | No  |
| ENSMUSG00000111465 | -3,90E+00 | -2,831937807 | 7,30E+00  | 6,91E-03 | 7,11E-02 | AC165080.4 | 0,07 | No  |
| ENSMUSG00000111466 | 1,87E+00  | -3,03364371  | 1,36E+00  | 2,43E-01 | 5,50E-01 | AC153847.1 | 3,66 | No  |
| ENSMUSG00000111468 | -1,87E+00 | -3,107637761 | 1,39E+00  | 2,38E-01 | 5,50E-01 | AC167244.1 | 0,27 | No  |
| ENSMUSG00000111471 | 2,21E-01  | 2,570593372  | 2,95E+00  | 8,59E-02 | 3,77E-01 | AC122463.1 | 1,17 | No  |
| ENSMUSG00000111473 | 1,81E+00  | -3,10765737  | 1,28E+00  | 2,58E-01 | 5,50E-01 | AC113001.1 | 3,49 | No  |
| ENSMUSG00000111474 | 1,41E-01  | -1,929350461 | 4,73E-02  | 8,28E-01 | 9,76E-01 | AC158630.3 | 1,10 | No  |



|                    |           |              |           |          |          |            |      |     |
|--------------------|-----------|--------------|-----------|----------|----------|------------|------|-----|
| ENSMUSG00000111478 | 3,12E+00  | -2,896177141 | 3,97E+00  | 4,64E-02 | 2,57E-01 | AC150314.1 | 8,68 | No  |
| ENSMUSG00000111481 | -9,68E-01 | -1,195627472 | 3,83E+00  | 5,03E-02 | 2,72E-01 | AC138284.3 | 0,51 | No  |
| ENSMUSG00000111485 | 4,91E-01  | -2,448695745 | 3,28E-01  | 5,67E-01 | 8,29E-01 | AC155921.1 | 1,41 | No  |
| ENSMUSG00000111487 | 9,01E-03  | -3,107646452 | -5,16E-10 | 1,00E+00 | 1,00E+00 | AC150314.2 | 1,01 | No  |
| ENSMUSG00000111489 | 1,87E+00  | -3,107639691 | 1,38E+00  | 2,40E-01 | 5,50E-01 | AC154826.2 | 3,67 | No  |
| ENSMUSG00000111490 | 7,61E-01  | -2,832015354 | 3,15E-01  | 5,75E-01 | 8,34E-01 | AC134248.1 | 1,69 | No  |
| ENSMUSG00000111491 | -7,95E-01 | -2,226231801 | 9,20E-01  | 3,38E-01 | 6,38E-01 | AC135669.2 | 0,58 | No  |
| ENSMUSG00000111494 | -1,86E+00 | -3,033612668 | 1,39E+00  | 2,38E-01 | 5,50E-01 | AC153955.4 | 0,28 | No  |
| ENSMUSG00000111496 | -1,08E-01 | 2,563683955  | 7,45E-01  | 3,88E-01 | 6,88E-01 | AC153912.4 | 0,93 | No  |
| ENSMUSG00000111497 | 8,54E-02  | 5,903076228  | 1,67E+00  | 1,96E-01 | 5,50E-01 | Raver1     | 1,06 | No  |
| ENSMUSG00000111504 | -4,60E-01 | -2,448678854 | 2,16E-01  | 6,42E-01 | 8,71E-01 | AC140409.3 | 0,73 | No  |
| ENSMUSG00000111505 | -7,15E-02 | -2,401382938 | 5,86E-03  | 9,39E-01 | 1,00E+00 | AC156163.1 | 0,95 | No  |
| ENSMUSG00000111507 | -3,58E+00 | -2,831958658 | 5,75E+00  | 1,65E-02 | 1,34E-01 | CT025664.2 | 0,08 | No  |
| ENSMUSG00000111509 | -3,83E-02 | -3,107651936 | -7,91E-11 | 1,00E+00 | 1,00E+00 | AC135353.1 | 0,97 | No  |
| ENSMUSG00000111514 | -2,61E-01 | -1,896104955 | 1,35E-01  | 7,14E-01 | 9,12E-01 | AC150314.3 | 0,83 | No  |
| ENSMUSG00000111515 | -4,13E+00 | -2,548148273 | 8,68E+00  | 3,22E-03 | 4,05E-02 | AC132474.4 | 0,06 | Yes |
| ENSMUSG00000111520 | -8,39E-01 | -2,831983135 | 3,86E-01  | 5,34E-01 | 8,07E-01 | AC166902.2 | 0,56 | No  |
| ENSMUSG00000111521 | 1,36E-01  | 2,36155067   | 1,02E+00  | 3,13E-01 | 6,13E-01 | AC122273.2 | 1,10 | No  |
| ENSMUSG00000111528 | -1,89E+00 | -3,1076441   | 1,42E+00  | 2,33E-01 | 5,50E-01 | AC145731.3 | 0,27 | No  |
| ENSMUSG00000111529 | -4,99E-01 | -0,675912136 | 1,71E+00  | 1,91E-01 | 5,50E-01 | AC154296.3 | 0,71 | No  |
| ENSMUSG00000111530 | 4,34E-01  | -2,831992007 | 1,46E-01  | 7,02E-01 | 9,05E-01 | AC161265.1 | 1,35 | No  |
| ENSMUSG00000111531 | -3,16E+00 | -2,963246013 | 4,20E+00  | 4,04E-02 | 2,38E-01 | AC161054.2 | 0,11 | No  |
| ENSMUSG00000111533 | -1,16E+00 | -2,311072452 | 2,20E+00  | 1,38E-01 | 4,68E-01 | AC137127.3 | 0,45 | No  |
| ENSMUSG00000111535 | 8,03E-02  | 1,199325706  | 1,68E-01  | 6,82E-01 | 8,94E-01 | AC153955.5 | 1,06 | No  |
| ENSMUSG00000111539 | 4,89E-01  | -0,683131851 | 1,48E+00  | 2,24E-01 | 5,50E-01 | AC127596.2 | 1,40 | No  |
| ENSMUSG00000111544 | -7,76E-02 | -2,963273445 | 2,73E-03  | 9,58E-01 | 1,00E+00 | AC122188.2 | 0,95 | No  |
| ENSMUSG00000111545 | -3,83E-02 | -3,107651936 | -7,91E-11 | 1,00E+00 | 1,00E+00 | AC115880.2 | 0,97 | No  |
| ENSMUSG00000111547 | -1,73E-01 | -1,655231281 | 8,69E-02  | 7,68E-01 | 9,41E-01 | AC164565.1 | 0,89 | No  |
| ENSMUSG00000111548 | -1,31E-02 | 3,117458797  | 1,44E-02  | 9,05E-01 | 1,00E+00 | AC167244.2 | 0,99 | No  |
| ENSMUSG00000111551 | -3,56E-01 | -2,226206172 | 1,60E-01  | 6,90E-01 | 8,99E-01 | AC115034.1 | 0,78 | No  |
| ENSMUSG00000111554 | 1,15E-01  | 2,694604584  | 8,91E-01  | 3,45E-01 | 6,46E-01 | AC159475.3 | 1,08 | No  |
| ENSMUSG00000111561 | -7,22E-01 | -2,35549398  | 5,84E-01  | 4,45E-01 | 7,36E-01 | AC165245.1 | 0,61 | No  |

|                    |           |              |           |          |          |             |      |    |
|--------------------|-----------|--------------|-----------|----------|----------|-------------|------|----|
| ENSMUSG00000111563 | 9,01E-03  | -3,107646452 | -5,16E-10 | 1,00E+00 | 1,00E+00 | AC113059.3  | 1,01 | No |
| ENSMUSG00000111564 | -1,37E+00 | -2,770589099 | 1,17E+00  | 2,79E-01 | 5,76E-01 | AC162179.1  | 0,39 | No |
| ENSMUSG00000111577 | -3,87E-02 | -2,896129263 | 7,15E-04  | 9,79E-01 | 1,00E+00 | AC124778.3  | 0,97 | No |
| ENSMUSG00000111582 | -8,15E-01 | -2,831982659 | 3,65E-01  | 5,46E-01 | 8,14E-01 | AC069561.4  | 0,57 | No |
| ENSMUSG00000111583 | 3,90E-01  | -0,785568815 | 9,13E-01  | 3,39E-01 | 6,40E-01 | AC150314.4  | 1,31 | No |
| ENSMUSG00000111594 | 5,07E-02  | 0,739672363  | 5,19E-02  | 8,20E-01 | 9,71E-01 | AC166750.1  | 1,04 | No |
| ENSMUSG00000111598 | -5,11E-01 | -0,980239637 | 1,42E+00  | 2,33E-01 | 5,50E-01 | AC131660.2  | 0,70 | No |
| ENSMUSG00000111600 | -9,98E-02 | 0,095897444  | 1,20E-01  | 7,29E-01 | 9,20E-01 | AC154740.2  | 0,93 | No |
| ENSMUSG00000111601 | 3,57E-02  | -0,155769533 | 1,23E-02  | 9,12E-01 | 1,00E+00 | AC122332.3  | 1,03 | No |
| ENSMUSG00000111605 | 1,48E-02  | -1,24703475  | 9,50E-04  | 9,75E-01 | 1,00E+00 | AC120394.3  | 1,01 | No |
| ENSMUSG00000111606 | 1,81E+00  | -2,963282131 | 1,30E+00  | 2,54E-01 | 5,50E-01 | AC161825.2  | 3,50 | No |
| ENSMUSG00000111608 | -6,16E-02 | -2,226261687 | 7,03E-03  | 9,33E-01 | 1,00E+00 | AC168279.1  | 0,96 | No |
| ENSMUSG00000111610 | 6,05E-01  | -2,226322676 | 4,08E-01  | 5,23E-01 | 8,01E-01 | AC160334.3  | 1,52 | No |
| ENSMUSG00000111613 | -3,49E-02 | 1,132324525  | 3,27E-02  | 8,56E-01 | 9,93E-01 | AC100406.3  | 0,98 | No |
| ENSMUSG00000111615 | -2,95E-02 | -2,831974433 | 4,69E-04  | 9,83E-01 | 1,00E+00 | AC174457.1  | 0,98 | No |
| ENSMUSG00000111617 | 3,38E-01  | -0,011419776 | 1,17E+00  | 2,79E-01 | 5,76E-01 | AC133650.2  | 1,26 | No |
| ENSMUSG00000111618 | 1,75E-01  | -1,816405044 | 7,25E-02  | 7,88E-01 | 9,53E-01 | AC098716.2  | 1,13 | No |
| ENSMUSG00000111619 | -3,18E+00 | -2,600633577 | 4,27E+00  | 3,88E-02 | 2,33E-01 | AC154630.1  | 0,11 | No |
| ENSMUSG00000111620 | -1,73E+00 | -2,770635089 | 2,09E+00  | 1,48E-01 | 4,87E-01 | AC118733.2  | 0,30 | No |
| ENSMUSG00000111621 | 4,05E-01  | -1,548280397 | 6,26E-01  | 4,29E-01 | 7,23E-01 | CT009708.2  | 1,32 | No |
| ENSMUSG00000111626 | -9,32E-01 | -1,800873921 | 2,14E+00  | 1,43E-01 | 4,79E-01 | AC171206.3  | 0,52 | No |
| ENSMUSG00000111629 | 5,97E-03  | -3,1461183   | -3,40E-10 | 1,00E+00 | 1,00E+00 | AC126257.4  | 1,00 | No |
| ENSMUSG00000111632 | 4,58E-01  | 1,691339341  | 7,68E+00  | 5,59E-03 | 6,06E-02 | AC148328.2  | 1,37 | No |
| ENSMUSG00000111635 | -2,67E+00 | -2,77054796  | 2,84E+00  | 9,21E-02 | 3,82E-01 | AC126672.2  | 0,16 | No |
| ENSMUSG00000111639 | 2,26E-01  | 0,572194197  | 8,49E-01  | 3,57E-01 | 6,58E-01 | AC117245.4  | 1,17 | No |
| ENSMUSG00000111641 | -3,57E-01 | -2,448724159 | 1,60E-01  | 6,89E-01 | 8,99E-01 | AC153955.6  | 0,78 | No |
| ENSMUSG00000111646 | -1,94E+00 | -3,107619243 | 1,50E+00  | 2,21E-01 | 5,50E-01 | AC153912.5  | 0,26 | No |
| ENSMUSG00000111651 | 1,89E+00  | -2,831936361 | 1,37E+00  | 2,41E-01 | 5,50E-01 | AC159899.2  | 3,71 | No |
| ENSMUSG00000111654 | 6,69E-02  | -1,24699779  | 1,80E-02  | 8,93E-01 | 1,00E+00 | AC127254.1  | 1,05 | No |
| ENSMUSG00000111656 | 6,59E-02  | -1,015788039 | 2,43E-02  | 8,76E-01 | 1,00E+00 | AC151971.10 | 1,05 | No |
| ENSMUSG00000111658 | 9,01E-03  | -3,107646452 | -5,16E-10 | 1,00E+00 | 1,00E+00 | AC122220.2  | 1,01 | No |
| ENSMUSG00000111661 | 7,04E-01  | -2,770593281 | 2,71E-01  | 6,03E-01 | 8,48E-01 | AC171206.4  | 1,63 | No |

|                    |           |              |           |          |          |                |      |     |
|--------------------|-----------|--------------|-----------|----------|----------|----------------|------|-----|
| ENSMUSG00000111662 | -1,40E+00 | -0,528672956 | 1,37E+01  | 2,10E-04 | 4,52E-03 | AC107819.3     | 0,38 | Yes |
| ENSMUSG00000111664 | 1,74E-01  | -0,56131005  | 2,08E-01  | 6,48E-01 | 8,75E-01 | AC153969.1     | 1,13 | No  |
| ENSMUSG00000111665 | -3,22E+00 | -2,963202658 | 4,38E+00  | 3,63E-02 | 2,26E-01 | AC131684.1     | 0,11 | No  |
| ENSMUSG00000111671 | -1,43E-01 | 0,643384254  | 3,85E-01  | 5,35E-01 | 8,07E-01 | AC156273.2     | 0,91 | No  |
| ENSMUSG00000111673 | 7,99E-01  | -2,740868279 | 4,50E-01  | 5,02E-01 | 7,87E-01 | CT025653.1     | 1,74 | No  |
| ENSMUSG00000111681 | 2,34E-01  | 0,53293387   | 9,50E-01  | 3,30E-01 | 6,30E-01 | AC138284.4     | 1,18 | No  |
| ENSMUSG00000111683 | -1,27E+00 | -3,146104694 | 7,49E-01  | 3,87E-01 | 6,87E-01 | CT025617.1     | 0,42 | No  |
| ENSMUSG00000111684 | -2,78E-01 | 3,591211145  | 8,29E+00  | 3,98E-03 | 4,71E-02 | AC073947.3     | 0,82 | Yes |
| ENSMUSG00000111685 | 1,93E-01  | 2,286160297  | 1,97E+00  | 1,61E-01 | 5,09E-01 | AC124577.4     | 1,14 | No  |
| ENSMUSG00000111686 | -2,07E-02 | 8,03101164   | 1,27E-01  | 7,22E-01 | 9,16E-01 | AC159892.1     | 0,99 | No  |
| ENSMUSG00000111692 | 7,83E-02  | 2,531196698  | 3,71E-01  | 5,42E-01 | 8,12E-01 | AC163637.2     | 1,06 | No  |
| ENSMUSG00000111693 | -2,71E+00 | -2,963235336 | 2,92E+00  | 8,75E-02 | 3,78E-01 | AC112956.1     | 0,15 | No  |
| ENSMUSG00000111712 | -5,88E-02 | -2,146014756 | 4,80E-03  | 9,45E-01 | 1,00E+00 | AC114645.3     | 0,96 | No  |
| ENSMUSG00000111713 | -2,78E-01 | -0,024359591 | 9,00E-01  | 3,43E-01 | 6,43E-01 | AL603745.2     | 0,82 | No  |
| ENSMUSG00000111720 | -2,69E+00 | -2,963229855 | 2,87E+00  | 9,01E-02 | 3,80E-01 | AC118476.6     | 0,16 | No  |
| ENSMUSG00000111722 | 1,22E-01  | -1,574219728 | 5,90E-02  | 8,08E-01 | 9,65E-01 | AC114645.4     | 1,09 | No  |
| ENSMUSG00000111725 | -6,25E-02 | -2,832015335 | 1,71E-03  | 9,67E-01 | 1,00E+00 | AC110235.1     | 0,96 | No  |
| ENSMUSG00000111728 | -3,83E-02 | -3,107651936 | -7,91E-11 | 1,00E+00 | 1,00E+00 | AC154319.2     | 0,97 | No  |
| ENSMUSG00000111730 | 1,65E+00  | -2,832047501 | 1,34E+00  | 2,47E-01 | 5,50E-01 | AC027700.3     | 3,14 | No  |
| ENSMUSG00000111731 | -4,80E-02 | -2,896135597 | 1,06E-03  | 9,74E-01 | 1,00E+00 | AC153569.2     | 0,97 | No  |
| ENSMUSG00000111733 | -5,01E-02 | -2,600659285 | 2,29E-03  | 9,62E-01 | 1,00E+00 | CAAA01216754.6 | 0,97 | No  |
| ENSMUSG00000111734 | -2,87E-01 | -0,211018183 | 8,93E-01  | 3,45E-01 | 6,46E-01 | AC166112.1     | 0,82 | No  |
| ENSMUSG00000111737 | -9,64E-02 | 1,437215512  | 3,15E-01  | 5,75E-01 | 8,34E-01 | AC123830.1     | 0,94 | No  |
| ENSMUSG00000111738 | -4,84E-01 | -0,963138553 | 1,32E+00  | 2,51E-01 | 5,50E-01 | AC138284.5     | 0,71 | No  |
| ENSMUSG00000111740 | -4,36E-02 | 2,044377481  | 8,79E-02  | 7,67E-01 | 9,40E-01 | AC122335.3     | 0,97 | No  |
| ENSMUSG00000111743 | -1,23E+00 | -3,146117124 | 7,12E-01  | 3,99E-01 | 6,98E-01 | CT943659.1     | 0,42 | No  |
| ENSMUSG00000111744 | 9,01E-03  | -3,107646452 | -5,16E-10 | 1,00E+00 | 1,00E+00 | AC161419.1     | 1,01 | No  |
| ENSMUSG00000111746 | -1,91E+00 | -2,896135647 | 1,45E+00  | 2,28E-01 | 5,50E-01 | AC160116.2     | 0,27 | No  |
| ENSMUSG00000111748 | 8,95E-01  | -2,355555313 | 1,23E+00  | 2,67E-01 | 5,63E-01 | AC138284.6     | 1,86 | No  |
| ENSMUSG00000111752 | 4,09E-01  | -0,165927733 | 1,68E+00  | 1,95E-01 | 5,50E-01 | AC100386.1     | 1,33 | No  |
| ENSMUSG00000111756 | -8,38E-02 | -2,497635682 | 8,08E-03  | 9,28E-01 | 1,00E+00 | AC122876.1     | 0,94 | No  |
| ENSMUSG00000111757 | -1,91E+00 | -2,963268868 | 1,45E+00  | 2,29E-01 | 5,50E-01 | CT009769.1     | 0,27 | No  |

|                    |           |              |           |          |          |            |      |     |
|--------------------|-----------|--------------|-----------|----------|----------|------------|------|-----|
| ENSMUSG00000111759 | 7,70E-02  | 3,274282418  | 5,33E-01  | 4,65E-01 | 7,54E-01 | AC122372.3 | 1,05 | No  |
| ENSMUSG00000111761 | -3,83E-02 | -3,107651936 | -7,91E-11 | 1,00E+00 | 1,00E+00 | AC112680.3 | 0,97 | No  |
| ENSMUSG00000111769 | 4,59E-01  | -2,770638924 | 1,65E-01  | 6,85E-01 | 8,97E-01 | AC124011.1 | 1,37 | No  |
| ENSMUSG00000111774 | -8,02E-02 | -2,770590173 | 4,36E-03  | 9,47E-01 | 1,00E+00 | AC166078.1 | 0,95 | No  |
| ENSMUSG00000111777 | -4,75E-02 | 1,325749459  | 6,09E-02  | 8,05E-01 | 9,63E-01 | AC140449.1 | 0,97 | No  |
| ENSMUSG00000111780 | -3,88E-03 | -3,03362684  | 4,02E-12  | 1,00E+00 | 1,00E+00 | AC166902.3 | 1,00 | No  |
| ENSMUSG00000111782 | -3,83E-02 | -3,107651936 | -7,91E-11 | 1,00E+00 | 1,00E+00 | AC123803.1 | 0,97 | No  |
| ENSMUSG00000111786 | -1,27E+00 | -3,146104694 | 7,49E-01  | 3,87E-01 | 6,87E-01 | CT485606.3 | 0,42 | No  |
| ENSMUSG00000111788 | 1,87E+00  | -3,107639691 | 1,38E+00  | 2,40E-01 | 5,50E-01 | AC142273.2 | 3,67 | No  |
| ENSMUSG00000111789 | 5,22E-01  | -0,704625333 | 1,90E+00  | 1,68E-01 | 5,22E-01 | AC133650.3 | 1,44 | No  |
| ENSMUSG00000111792 | -8,52E-01 | -2,165715642 | 1,63E+00  | 2,01E-01 | 5,50E-01 | AC117245.5 | 0,55 | No  |
| ENSMUSG00000111793 | 6,05E-05  | 2,343361351  | 1,97E-07  | 1,00E+00 | 1,00E+00 | CT025531.1 | 1,00 | No  |
| ENSMUSG00000111794 | 1,23E+00  | -3,107628512 | 6,90E-01  | 4,06E-01 | 7,02E-01 | AC140409.4 | 2,35 | No  |
| ENSMUSG00000111795 | -9,83E-02 | 2,993414604  | 7,59E-01  | 3,84E-01 | 6,85E-01 | AC116713.1 | 0,93 | No  |
| ENSMUSG00000111797 | 1,37E-01  | 0,183483644  | 2,66E-01  | 6,06E-01 | 8,50E-01 | AC138284.7 | 1,10 | No  |
| ENSMUSG00000111806 | 2,63E+00  | -2,96325892  | 2,67E+00  | 1,02E-01 | 3,94E-01 | AC121793.2 | 6,19 | No  |
| ENSMUSG00000111808 | -1,86E-01 | -1,574206645 | 1,10E-01  | 7,41E-01 | 9,27E-01 | AC159308.6 | 0,88 | No  |
| ENSMUSG00000111810 | 1,43E-01  | -2,268106152 | 3,04E-02  | 8,61E-01 | 9,96E-01 | AC146296.1 | 1,10 | No  |
| ENSMUSG00000111812 | 1,23E+00  | -2,655126426 | 9,45E-01  | 3,31E-01 | 6,32E-01 | AC161371.1 | 2,35 | No  |
| ENSMUSG00000111815 | -7,12E-02 | -1,96327825  | 1,06E-02  | 9,18E-01 | 1,00E+00 | AC107662.1 | 0,95 | No  |
| ENSMUSG00000111816 | 7,48E-02  | 3,178867246  | 4,78E-01  | 4,89E-01 | 7,76E-01 | AC123708.1 | 1,05 | No  |
| ENSMUSG00000111817 | 4,36E-01  | 0,087099331  | 2,34E+00  | 1,26E-01 | 4,44E-01 | CT030247.6 | 1,35 | No  |
| ENSMUSG00000111818 | 2,17E-02  | -0,300096658 | 3,30E-03  | 9,54E-01 | 1,00E+00 | AC114645.5 | 1,02 | No  |
| ENSMUSG00000111821 | -6,21E-02 | -2,600637549 | 4,40E-03  | 9,47E-01 | 1,00E+00 | AC158622.5 | 0,96 | No  |
| ENSMUSG00000111824 | 2,85E-01  | -2,801021417 | 5,01E-02  | 8,23E-01 | 9,73E-01 | AC161250.2 | 1,22 | No  |
| ENSMUSG00000111828 | -1,64E-02 | -1,126664257 | 1,15E-03  | 9,73E-01 | 1,00E+00 | AC123708.2 | 0,99 | No  |
| ENSMUSG00000111833 | -4,95E-01 | -2,929318586 | 1,23E-01  | 7,25E-01 | 9,18E-01 | AC156795.2 | 0,71 | No  |
| ENSMUSG00000111834 | 2,62E-01  | -1,896122838 | 1,59E-01  | 6,90E-01 | 8,99E-01 | AL928687.1 | 1,20 | No  |
| ENSMUSG00000111836 | -2,71E+00 | -2,963235336 | 2,92E+00  | 8,75E-02 | 3,78E-01 | AC140363.2 | 0,15 | No  |
| ENSMUSG00000111837 | 1,25E+00  | -0,48550874  | 9,35E+00  | 2,23E-03 | 3,05E-02 | AC164612.2 | 2,38 | Yes |
| ENSMUSG00000111840 | -2,36E-01 | -1,998007498 | 1,23E-01  | 7,25E-01 | 9,18E-01 | AC159809.2 | 0,85 | No  |
| ENSMUSG00000111842 | 5,63E-01  | 0,443350627  | 4,74E+00  | 2,95E-02 | 1,96E-01 | AC163623.2 | 1,48 | No  |

|                    |           |              |          |          |          |                |      |     |
|--------------------|-----------|--------------|----------|----------|----------|----------------|------|-----|
| ENSMUSG00000111844 | 8,75E-01  | -1,832083293 | 1,68E+00 | 1,94E-01 | 5,50E-01 | AC159810.1     | 1,83 | No  |
| ENSMUSG00000111845 | -3,01E-01 | 0,458283276  | 1,49E+00 | 2,22E-01 | 5,50E-01 | AC155907.2     | 0,81 | No  |
| ENSMUSG00000111846 | 1,87E+00  | -3,033632735 | 1,36E+00 | 2,43E-01 | 5,50E-01 | CT033754.1     | 3,66 | No  |
| ENSMUSG00000111847 | -2,16E-01 | 1,918108453  | 1,93E+00 | 1,65E-01 | 5,17E-01 | AC160403.2     | 0,86 | No  |
| ENSMUSG00000111852 | -8,36E-01 | -2,655172203 | 3,84E-01 | 5,36E-01 | 8,08E-01 | AC113527.1     | 0,56 | No  |
| ENSMUSG00000111856 | -3,03E-01 | 3,059774582  | 7,41E+00 | 6,49E-03 | 6,79E-02 | AC163623.3     | 0,81 | No  |
| ENSMUSG00000111857 | 1,27E+00  | -2,355591152 | 2,19E+00 | 1,39E-01 | 4,70E-01 | AL603745.3     | 2,41 | No  |
| ENSMUSG00000111858 | 3,60E-01  | -2,896161081 | 6,53E-02 | 7,98E-01 | 9,59E-01 | AC242690.2     | 1,28 | No  |
| ENSMUSG00000111864 | 1,87E+00  | -3,107639691 | 1,38E+00 | 2,40E-01 | 5,50E-01 | AC173346.1     | 3,67 | No  |
| ENSMUSG00000111865 | -2,02E+00 | -2,770602897 | 3,08E+00 | 7,90E-02 | 3,60E-01 | AC153729.5     | 0,25 | No  |
| ENSMUSG00000111868 | -1,43E-01 | 0,643384254  | 3,85E-01 | 5,35E-01 | 8,07E-01 | AC156273.3     | 0,91 | No  |
| ENSMUSG00000111870 | 2,51E-01  | -1,863663574 | 1,46E-01 | 7,03E-01 | 9,06E-01 | AC154699.2     | 1,19 | No  |
| ENSMUSG00000111875 | 1,52E-02  | 6,153559778  | 5,52E-02 | 8,14E-01 | 9,68E-01 | AC158239.2     | 1,01 | No  |
| ENSMUSG00000111877 | -1,72E-01 | 5,695588308  | 6,50E+00 | 1,08E-02 | 9,89E-02 | AC129016.2     | 0,89 | No  |
| ENSMUSG00000111878 | -1,89E+00 | -3,1076441   | 1,42E+00 | 2,33E-01 | 5,50E-01 | AC166060.1     | 0,27 | No  |
| ENSMUSG00000111880 | 1,85E+00  | -3,107657832 | 1,35E+00 | 2,46E-01 | 5,50E-01 | AC153952.1     | 3,61 | No  |
| ENSMUSG00000111886 | 1,83E+00  | -2,963282593 | 1,33E+00 | 2,50E-01 | 5,50E-01 | AC123067.1     | 3,56 | No  |
| ENSMUSG00000111888 | -6,66E-01 | 1,998170089  | 2,08E+01 | 5,09E-06 | 1,84E-04 | AC118202.1     | 0,63 | Yes |
| ENSMUSG00000111889 | 3,90E-01  | -0,16086695  | 1,51E+00 | 2,20E-01 | 5,50E-01 | AC122860.1     | 1,31 | No  |
| ENSMUSG00000111892 | -3,34E-01 | -0,574158182 | 8,82E-01 | 3,48E-01 | 6,49E-01 | AC153524.1     | 0,79 | No  |
| ENSMUSG00000111893 | 3,05E-01  | -2,600681222 | 9,46E-02 | 7,58E-01 | 9,36E-01 | AC140314.1     | 1,24 | No  |
| ENSMUSG00000111895 | -4,21E-01 | -1,641302797 | 5,14E-01 | 4,73E-01 | 7,61E-01 | CAAA01066804.1 | 0,75 | No  |
| ENSMUSG00000111897 | -1,71E-01 | 6,85674425   | 7,79E+00 | 5,24E-03 | 5,79E-02 | AC151846.1     | 0,89 | No  |
| ENSMUSG00000111904 | -4,43E-02 | 3,537682209  | 2,07E-01 | 6,49E-01 | 8,75E-01 | AC165349.1     | 0,97 | No  |
| ENSMUSG00000111905 | -1,07E-02 | 2,294645984  | 5,99E-03 | 9,38E-01 | 1,00E+00 | AC153962.1     | 0,99 | No  |
| ENSMUSG00000111908 | 1,02E+00  | -1,963270865 | 2,05E+00 | 1,52E-01 | 4,95E-01 | AC155712.1     | 2,03 | No  |
| ENSMUSG00000111912 | -1,89E+00 | -3,1076441   | 1,42E+00 | 2,33E-01 | 5,50E-01 | AC152946.1     | 0,27 | No  |
| ENSMUSG00000111914 | 1,85E+00  | -3,107657832 | 1,35E+00 | 2,46E-01 | 5,50E-01 | AC122024.1     | 3,61 | No  |
| ENSMUSG00000111916 | -2,45E-01 | -0,002349002 | 6,63E-01 | 4,15E-01 | 7,11E-01 | AC162932.1     | 0,84 | No  |
| ENSMUSG00000111920 | -9,67E-03 | -2,896100626 | 7,51E-05 | 9,93E-01 | 1,00E+00 | CT010444.1     | 0,99 | No  |
| ENSMUSG00000111928 | -4,39E-02 | -2,497589839 | 2,20E-03 | 9,63E-01 | 1,00E+00 | AC161254.1     | 0,97 | No  |
| ENSMUSG00000111929 | 5,00E-01  | -0,471249314 | 1,93E+00 | 1,65E-01 | 5,17E-01 | AC154585.1     | 1,41 | No  |

|                    |           |              |           |          |          |            |      |     |
|--------------------|-----------|--------------|-----------|----------|----------|------------|------|-----|
| ENSMUSG00000111932 | -3,54E-02 | 2,348777922  | 6,90E-02  | 7,93E-01 | 9,56E-01 | AC124346.1 | 0,98 | No  |
| ENSMUSG00000111933 | 3,64E-01  | -1,548170557 | 4,27E-01  | 5,13E-01 | 7,95E-01 | AC108401.1 | 1,29 | No  |
| ENSMUSG00000111936 | 1,85E+00  | -3,107657832 | 1,35E+00  | 2,46E-01 | 5,50E-01 | AC117232.2 | 3,61 | No  |
| ENSMUSG00000111937 | -1,52E+00 | -2,497601584 | 2,39E+00  | 1,22E-01 | 4,36E-01 | AC132304.1 | 0,35 | No  |
| ENSMUSG00000111938 | 1,81E+00  | -2,89616582  | 1,31E+00  | 2,53E-01 | 5,50E-01 | AC241534.1 | 3,51 | No  |
| ENSMUSG00000111940 | -7,72E-01 | -1,070259745 | 2,64E+00  | 1,04E-01 | 3,96E-01 | AC140264.1 | 0,59 | No  |
| ENSMUSG00000111942 | 1,88E-01  | 6,175678042  | 8,57E+00  | 3,43E-03 | 4,23E-02 | AC135641.1 | 1,14 | Yes |
| ENSMUSG00000111943 | 4,23E-02  | -2,226245555 | 2,79E-03  | 9,58E-01 | 1,00E+00 | AC153890.1 | 1,03 | No  |
| ENSMUSG00000111946 | -1,89E+00 | -3,1076441   | 1,42E+00  | 2,33E-01 | 5,50E-01 | AC159747.1 | 0,27 | No  |
| ENSMUSG00000111947 | -5,76E-01 | -2,770642866 | 2,60E-01  | 6,10E-01 | 8,51E-01 | AC131120.1 | 0,67 | No  |
| ENSMUSG00000111954 | -6,80E-01 | -0,485138994 | 4,11E+00  | 4,27E-02 | 2,46E-01 | AC153943.1 | 0,62 | No  |
| ENSMUSG00000111955 | 3,14E-02  | -3,107617333 | -7,69E-10 | 1,00E+00 | 1,00E+00 | AC144461.1 | 1,02 | No  |
| ENSMUSG00000111957 | 4,49E-01  | -2,832053002 | 1,58E-01  | 6,91E-01 | 9,00E-01 | AC110381.1 | 1,37 | No  |
| ENSMUSG00000111960 | -1,06E-01 | 1,82463825   | 4,45E-01  | 5,05E-01 | 7,89E-01 | AC154864.1 | 0,93 | No  |
| ENSMUSG00000111961 | -8,61E-01 | -2,896108407 | 4,07E-01  | 5,23E-01 | 8,01E-01 | AC122210.1 | 0,55 | No  |
| ENSMUSG00000111964 | -2,82E-01 | 6,76532481   | 2,11E+01  | 4,46E-06 | 1,64E-04 | AC153825.1 | 0,82 | Yes |
| ENSMUSG00000111966 | -3,70E-01 | 1,581497437  | 4,87E+00  | 2,74E-02 | 1,87E-01 | AL589661.1 | 0,77 | No  |
| ENSMUSG00000111967 | 8,99E-01  | -1,473053816 | 2,86E+00  | 9,10E-02 | 3,82E-01 | CT030169.1 | 1,87 | No  |
| ENSMUSG00000111968 | -5,90E-01 | -1,424890526 | 1,16E+00  | 2,81E-01 | 5,78E-01 | AC124399.1 | 0,66 | No  |
| ENSMUSG00000111969 | 5,90E-01  | -1,31118353  | 1,11E+00  | 2,93E-01 | 5,88E-01 | AC153943.2 | 1,50 | No  |
| ENSMUSG00000111971 | -1,68E-01 | 2,036033094  | 1,23E+00  | 2,68E-01 | 5,64E-01 | AC158232.1 | 0,89 | No  |
| ENSMUSG00000111973 | -1,78E-02 | -2,770537225 | 2,35E-04  | 9,88E-01 | 1,00E+00 | AC158803.1 | 0,99 | No  |
| ENSMUSG00000111977 | -4,08E-02 | -2,963255775 | 7,59E-04  | 9,78E-01 | 1,00E+00 | AC132265.1 | 0,97 | No  |
| ENSMUSG00000111983 | -1,87E+00 | -3,107637761 | 1,39E+00  | 2,38E-01 | 5,50E-01 | AC167234.1 | 0,27 | No  |
| ENSMUSG00000111985 | 5,81E-02  | -1,711673882 | 9,86E-03  | 9,21E-01 | 1,00E+00 | AC153889.1 | 1,04 | No  |
| ENSMUSG00000111986 | -1,94E+00 | -3,107619243 | 1,50E+00  | 2,21E-01 | 5,50E-01 | AC159888.1 | 0,26 | No  |
| ENSMUSG00000111987 | -4,85E-01 | -2,448729868 | 2,40E-01  | 6,24E-01 | 8,59E-01 | AC125020.1 | 0,71 | No  |
| ENSMUSG00000111989 | -2,71E+00 | -2,896102977 | 2,90E+00  | 8,85E-02 | 3,79E-01 | AC121569.1 | 0,15 | No  |
| ENSMUSG00000111992 | 4,89E-02  | 4,551774279  | 3,71E-01  | 5,42E-01 | 8,12E-01 | AC160863.1 | 1,03 | No  |
| ENSMUSG00000111997 | -6,97E-02 | -2,401296463 | 4,40E-03  | 9,47E-01 | 1,00E+00 | AC166253.1 | 0,95 | No  |
| ENSMUSG00000112000 | -3,36E-01 | -1,205848437 | 4,61E-01  | 4,97E-01 | 7,82E-01 | AC153501.1 | 0,79 | No  |
| ENSMUSG00000112001 | 2,18E+00  | -2,015856746 | 8,73E+00  | 3,12E-03 | 3,95E-02 | AC167202.1 | 4,55 | Yes |

|                    |           |              |           |          |          |            |  |      |     |
|--------------------|-----------|--------------|-----------|----------|----------|------------|--|------|-----|
| ENSMUSG00000112002 | -9,87E-01 | -2,226264324 | 1,51E+00  | 2,20E-01 | 5,50E-01 | AC153856.1 |  | 0,50 | No  |
| ENSMUSG00000112003 | -4,68E-01 | 1,836915189  | 8,66E+00  | 3,26E-03 | 4,09E-02 | AC159297.3 |  | 0,72 | Yes |
| ENSMUSG00000112007 | -2,69E+00 | -2,600670098 | 2,87E+00  | 9,02E-02 | 3,81E-01 | AC153864.1 |  | 0,16 | No  |
| ENSMUSG00000112008 | -4,16E-02 | 1,71586623   | 6,55E-02  | 7,98E-01 | 9,59E-01 | AC124556.1 |  | 0,97 | No  |
| ENSMUSG00000112009 | -5,50E-01 | -1,574211188 | 1,08E+00  | 2,99E-01 | 5,95E-01 | AC140264.2 |  | 0,68 | No  |
| ENSMUSG00000112012 | -1,31E+00 | -2,89612966  | 1,07E+00  | 3,00E-01 | 5,97E-01 | AC131720.2 |  | 0,40 | No  |
| ENSMUSG00000112013 | 5,97E-03  | -3,1461183   | -3,40E-10 | 1,00E+00 | 1,00E+00 | AC153522.1 |  | 1,00 | No  |
| ENSMUSG00000112014 | -6,06E-01 | -2,268068386 | 5,00E-01  | 4,79E-01 | 7,67E-01 | AC140264.3 |  | 0,66 | No  |
| ENSMUSG00000112017 | 3,76E-01  | 0,20279608   | 1,74E+00  | 1,87E-01 | 5,50E-01 | AC153887.1 |  | 1,30 | No  |
| ENSMUSG00000112021 | 1,81E+00  | -3,10765737  | 1,28E+00  | 2,58E-01 | 5,50E-01 | AC153887.2 |  | 3,49 | No  |
| ENSMUSG00000112022 | -1,73E-02 | 1,572446431  | 1,03E-02  | 9,19E-01 | 1,00E+00 | AC157515.1 |  | 0,99 | No  |
| ENSMUSG00000112023 | 1,31E-01  | 11,07963112  | 5,46E+00  | 1,95E-02 | 1,49E-01 | Lilr4b     |  | 1,09 | No  |
| ENSMUSG00000112026 | -1,84E-01 | -1,13631329  | 1,69E-01  | 6,81E-01 | 8,94E-01 | AC168315.1 |  | 0,88 | No  |
| ENSMUSG00000112027 | 7,98E-02  | 1,928575103  | 2,83E-01  | 5,95E-01 | 8,43E-01 | AC158600.1 |  | 1,06 | No  |
| ENSMUSG00000112030 | -5,46E-01 | -2,832026619 | 2,32E-01  | 6,30E-01 | 8,62E-01 | AC133174.1 |  | 0,68 | No  |
| ENSMUSG00000112031 | -1,88E+00 | -2,35557561  | 4,14E+00  | 4,18E-02 | 2,43E-01 | AC152979.1 |  | 0,27 | No  |
| ENSMUSG00000112035 | 7,15E-01  | -2,896163419 | 2,78E-01  | 5,98E-01 | 8,45E-01 | AC122018.1 |  | 1,64 | No  |
| ENSMUSG00000112042 | -1,86E+00 | -3,033612668 | 1,39E+00  | 2,38E-01 | 5,50E-01 | AL713985.1 |  | 0,28 | No  |
| ENSMUSG00000112043 | -3,83E-02 | -3,107651936 | -7,91E-11 | 1,00E+00 | 1,00E+00 | AC110816.1 |  | 0,97 | No  |
| ENSMUSG00000112044 | -4,01E-02 | -2,963238858 | 7,31E-04  | 9,78E-01 | 1,00E+00 | AC141895.1 |  | 0,97 | No  |
| ENSMUSG00000112045 | 7,74E-01  | -2,831956349 | 3,26E-01  | 5,68E-01 | 8,30E-01 | AC152953.1 |  | 1,71 | No  |
| ENSMUSG00000112046 | -1,89E+00 | -3,1076441   | 1,42E+00  | 2,33E-01 | 5,50E-01 | AC138459.1 |  | 0,27 | No  |
| ENSMUSG00000112048 | 1,81E+00  | -3,10765737  | 1,28E+00  | 2,58E-01 | 5,50E-01 | AC133948.2 |  | 3,49 | No  |
| ENSMUSG00000112049 | 7,63E-01  | -2,896152067 | 3,18E-01  | 5,73E-01 | 8,32E-01 | AC153532.1 |  | 1,70 | No  |
| ENSMUSG00000112051 | -6,70E-01 | -1,412916432 | 1,54E+00  | 2,14E-01 | 5,50E-01 | AC153889.2 |  | 0,63 | No  |
| ENSMUSG00000112058 | -1,00E+00 | -2,448732317 | 1,21E+00  | 2,71E-01 | 5,68E-01 | AC165164.1 |  | 0,50 | No  |
| ENSMUSG00000112060 | -1,94E+00 | -3,107619243 | 1,50E+00  | 2,21E-01 | 5,50E-01 | AC138290.1 |  | 0,26 | No  |
| ENSMUSG00000112061 | 1,26E+00  | -0,697613892 | 8,67E+00  | 3,24E-03 | 4,06E-02 | AC167202.2 |  | 2,40 | Yes |
| ENSMUSG00000112063 | -9,42E-01 | -2,655147722 | 7,78E-01  | 3,78E-01 | 6,79E-01 | AC161114.1 |  | 0,52 | No  |
| ENSMUSG00000112064 | 1,26E+00  | -2,770600402 | 9,80E-01  | 3,22E-01 | 6,22E-01 | AC161114.2 |  | 2,39 | No  |
| ENSMUSG00000112067 | -3,95E-02 | -2,711675921 | 1,36E-03  | 9,71E-01 | 1,00E+00 | AC125487.1 |  | 0,97 | No  |
| ENSMUSG00000112068 | -1,16E-01 | 1,070509512  | 3,30E-01  | 5,66E-01 | 8,28E-01 | AC117232.3 |  | 0,92 | No  |

|                    |           |              |           |          |          |            |      |     |
|--------------------|-----------|--------------|-----------|----------|----------|------------|------|-----|
| ENSMUSG00000112071 | -7,22E-01 | -2,548209385 | 5,84E-01  | 4,45E-01 | 7,36E-01 | CT010463.1 | 0,61 | No  |
| ENSMUSG00000112074 | -1,94E+00 | -3,107619243 | 1,50E+00  | 2,21E-01 | 5,50E-01 | AC122301.2 | 0,26 | No  |
| ENSMUSG00000112076 | -5,88E-02 | -3,033652696 | 1,62E-03  | 9,68E-01 | 1,00E+00 | AC164616.1 | 0,96 | No  |
| ENSMUSG00000112080 | -2,68E+00 | -3,033645766 | 2,84E+00  | 9,17E-02 | 3,82E-01 | AC165164.2 | 0,16 | No  |
| ENSMUSG00000112082 | 7,28E-01  | -2,832008581 | 2,89E-01  | 5,91E-01 | 8,41E-01 | AC101882.1 | 1,66 | No  |
| ENSMUSG00000112084 | 1,01E-01  | -1,831923406 | 2,47E-02  | 8,75E-01 | 1,00E+00 | AC102114.1 | 1,07 | No  |
| ENSMUSG00000112089 | -1,89E+00 | -3,1076441   | 1,42E+00  | 2,33E-01 | 5,50E-01 | AC153977.2 | 0,27 | No  |
| ENSMUSG00000112090 | -2,68E+00 | -3,033645766 | 2,84E+00  | 9,17E-02 | 3,82E-01 | AC124572.1 | 0,16 | No  |
| ENSMUSG00000112093 | -3,68E-01 | -2,740843493 | 9,93E-02  | 7,53E-01 | 9,33E-01 | AC127337.1 | 0,77 | No  |
| ENSMUSG00000112094 | -1,87E+00 | -3,107637761 | 1,39E+00  | 2,38E-01 | 5,50E-01 | AC160112.1 | 0,27 | No  |
| ENSMUSG00000112095 | -5,45E-01 | 0,439010894  | 4,77E+00  | 2,90E-02 | 1,94E-01 | AC132332.1 | 0,69 | No  |
| ENSMUSG00000112096 | -5,56E-01 | -0,755590114 | 1,79E+00  | 1,81E-01 | 5,43E-01 | AC124453.1 | 0,68 | No  |
| ENSMUSG00000112097 | -6,16E-01 | -2,401399628 | 5,17E-01  | 4,72E-01 | 7,60E-01 | AC122829.1 | 0,65 | No  |
| ENSMUSG00000112099 | -1,33E-01 | 4,56383014   | 2,82E+00  | 9,33E-02 | 3,83E-01 | AC129329.1 | 0,91 | No  |
| ENSMUSG00000112101 | -3,29E-01 | -2,31112815  | 1,62E-01  | 6,87E-01 | 8,98E-01 | AC159326.1 | 0,80 | No  |
| ENSMUSG00000112104 | -2,70E+00 | -3,033614577 | 2,89E+00  | 8,93E-02 | 3,79E-01 | AC153840.1 | 0,15 | No  |
| ENSMUSG00000112105 | -1,48E-01 | 1,740242233  | 7,94E-01  | 3,73E-01 | 6,74E-01 | AC155273.1 | 0,90 | No  |
| ENSMUSG00000112109 | 2,74E-02  | -3,033621357 | 9,16E-12  | 1,00E+00 | 1,00E+00 | AC159466.1 | 1,02 | No  |
| ENSMUSG00000112110 | -6,60E-02 | -2,401339337 | 3,95E-03  | 9,50E-01 | 1,00E+00 | AC158605.1 | 0,96 | No  |
| ENSMUSG00000112112 | 3,14E-02  | -3,107617333 | -7,69E-10 | 1,00E+00 | 1,00E+00 | AC154300.1 | 1,02 | No  |
| ENSMUSG00000112115 | -1,87E+00 | -3,107637761 | 1,39E+00  | 2,38E-01 | 5,50E-01 | AC132384.5 | 0,27 | No  |
| ENSMUSG00000112116 | 8,25E-01  | -2,311187119 | 5,92E-01  | 4,42E-01 | 7,34E-01 | AC137067.1 | 1,77 | No  |
| ENSMUSG00000112120 | 3,99E-01  | 3,649163329  | 1,69E+01  | 3,97E-05 | 1,12E-03 | AC153379.1 | 1,32 | Yes |
| ENSMUSG00000112121 | -3,18E+00 | -2,896082478 | 4,25E+00  | 3,93E-02 | 2,35E-01 | AC163903.1 | 0,11 | No  |
| ENSMUSG00000112123 | -1,28E-02 | 0,240723752  | 2,35E-03  | 9,61E-01 | 1,00E+00 | AC131977.1 | 0,99 | No  |
| ENSMUSG00000112124 | -3,83E-02 | -3,107651936 | -7,91E-11 | 1,00E+00 | 1,00E+00 | AC155258.1 | 0,97 | No  |
| ENSMUSG00000112129 | -2,25E+00 | -1,963164735 | 9,22E+00  | 2,39E-03 | 3,23E-02 | Pbld1      | 0,21 | Yes |
| ENSMUSG00000112132 | -4,84E-01 | -1,800983503 | 7,57E-01  | 3,84E-01 | 6,86E-01 | AC153524.2 | 0,72 | No  |
| ENSMUSG00000112134 | -6,23E-02 | -0,614165548 | 2,98E-02  | 8,63E-01 | 9,97E-01 | AC155637.1 | 0,96 | No  |
| ENSMUSG00000112135 | 4,55E-02  | 3,142090419  | 1,76E-01  | 6,74E-01 | 8,90E-01 | AC153856.2 | 1,03 | No  |
| ENSMUSG00000112137 | -5,25E-02 | -3,033661434 | 4,08E-11  | 1,00E+00 | 1,00E+00 | AC102312.1 | 0,96 | No  |
| ENSMUSG00000112138 | 7,44E-01  | -2,963286135 | 3,02E-01  | 5,83E-01 | 8,38E-01 | AC120002.1 | 1,67 | No  |



|                    |           |              |           |          |          |            |      |    |
|--------------------|-----------|--------------|-----------|----------|----------|------------|------|----|
| ENSMUSG00000112140 | 9,61E-02  | 2,282189381  | 4,47E-01  | 5,04E-01 | 7,88E-01 | AC107661.1 | 1,07 | No |
| ENSMUSG00000112141 | -4,80E-01 | 0,927839683  | 5,04E+00  | 2,47E-02 | 1,74E-01 | AC153379.2 | 0,72 | No |
| ENSMUSG00000112144 | -6,28E-01 | -1,863742924 | 7,66E-01  | 3,82E-01 | 6,83E-01 | AC142191.1 | 0,65 | No |
| ENSMUSG00000112145 | -3,85E-01 | 0,592916282  | 2,65E+00  | 1,04E-01 | 3,96E-01 | AC155256.1 | 0,77 | No |
| ENSMUSG00000112146 | -7,21E-01 | -2,497568955 | 5,81E-01  | 4,46E-01 | 7,37E-01 | AC122390.1 | 0,61 | No |
| ENSMUSG00000112147 | 1,23E+00  | -2,832000607 | 9,43E-01  | 3,32E-01 | 6,32E-01 | AC147782.1 | 2,35 | No |
| ENSMUSG00000112148 | 1,51E-01  | 10,79963095  | 7,24E+00  | 7,13E-03 | 7,28E-02 | Lilrb4a    | 1,11 | No |
| ENSMUSG00000112150 | 2,95E-01  | -1,070127274 | 4,14E-01  | 5,20E-01 | 7,99E-01 | AC159296.1 | 1,23 | No |
| ENSMUSG00000112158 | 1,81E+00  | -3,10765737  | 1,28E+00  | 2,58E-01 | 5,50E-01 | AC102369.2 | 3,49 | No |
| ENSMUSG00000112160 | -5,87E-01 | 0,412754202  | 5,51E+00  | 1,89E-02 | 1,46E-01 | Gm3055     | 0,67 | No |
| ENSMUSG00000112162 | -1,89E+00 | -3,1076441   | 1,42E+00  | 2,33E-01 | 5,50E-01 | AC155929.2 | 0,27 | No |
| ENSMUSG00000112163 | -3,24E-02 | 4,106850081  | 1,38E-01  | 7,10E-01 | 9,09E-01 | AC158606.2 | 0,98 | No |
| ENSMUSG00000112165 | 3,15E+00  | -2,963263135 | 4,04E+00  | 4,45E-02 | 2,51E-01 | AC124399.2 | 8,85 | No |
| ENSMUSG00000112167 | 5,46E-01  | -0,697447273 | 1,63E+00  | 2,02E-01 | 5,50E-01 | AC163033.1 | 1,46 | No |
| ENSMUSG00000112168 | -1,23E+00 | -2,655096975 | 1,46E+00  | 2,27E-01 | 5,50E-01 | AC158619.1 | 0,43 | No |
| ENSMUSG00000112171 | 6,22E-01  | -0,485429888 | 3,18E+00  | 7,47E-02 | 3,47E-01 | AC155255.1 | 1,54 | No |
| ENSMUSG00000112173 | 6,42E-02  | -0,160719765 | 3,93E-02  | 8,43E-01 | 9,85E-01 | AC122539.1 | 1,05 | No |
| ENSMUSG00000112183 | 2,57E+00  | -2,963293044 | 2,56E+00  | 1,10E-01 | 4,06E-01 | AC139754.1 | 5,93 | No |
| ENSMUSG00000112184 | -3,67E-01 | -2,448680423 | 1,69E-01  | 6,81E-01 | 8,93E-01 | AC158803.2 | 0,78 | No |
| ENSMUSG00000112186 | -3,23E-02 | 3,552166307  | 1,08E-01  | 7,42E-01 | 9,27E-01 | AC165349.2 | 0,98 | No |
| ENSMUSG00000112188 | 2,66E+00  | -2,96324125  | 2,74E+00  | 9,79E-02 | 3,91E-01 | AC153937.2 | 6,34 | No |
| ENSMUSG00000112190 | 1,78E+00  | -2,963287612 | 1,28E+00  | 2,58E-01 | 5,50E-01 | AC167022.1 | 3,44 | No |
| ENSMUSG00000112193 | 3,14E-02  | -3,107617333 | -7,69E-10 | 1,00E+00 | 1,00E+00 | AC121844.2 | 1,02 | No |
| ENSMUSG00000112196 | 7,50E-01  | -0,697523514 | 3,64E+00  | 5,63E-02 | 2,91E-01 | AC172027.1 | 1,68 | No |
| ENSMUSG00000112198 | -6,39E-02 | -2,831998678 | 2,77E-03  | 9,58E-01 | 1,00E+00 | AC160028.2 | 0,96 | No |
| ENSMUSG00000112203 | 3,42E-01  | -0,56994477  | 8,77E-01  | 3,49E-01 | 6,50E-01 | AC153506.1 | 1,27 | No |
| ENSMUSG00000112212 | -6,59E-02 | -2,448670608 | 4,98E-03  | 9,44E-01 | 1,00E+00 | AC153530.1 | 0,96 | No |
| ENSMUSG00000112216 | 2,95E-02  | 2,46531449   | 5,29E-02  | 8,18E-01 | 9,70E-01 | AC153856.3 | 1,02 | No |
| ENSMUSG00000112218 | -6,62E-02 | 4,175406637  | 5,91E-01  | 4,42E-01 | 7,34E-01 | AC164561.1 | 0,96 | No |
| ENSMUSG00000112219 | -1,89E+00 | -3,1076441   | 1,42E+00  | 2,33E-01 | 5,50E-01 | AC153567.1 | 0,27 | No |
| ENSMUSG00000112220 | -3,10E-01 | -2,311146587 | 1,44E-01  | 7,04E-01 | 9,06E-01 | AC110381.2 | 0,81 | No |
| ENSMUSG00000112222 | 1,17E-01  | 2,597039542  | 8,45E-01  | 3,58E-01 | 6,59E-01 | AC139754.2 | 1,08 | No |

|                    |           |              |           |          |          |            |      |     |
|--------------------|-----------|--------------|-----------|----------|----------|------------|------|-----|
| ENSMUSG00000112226 | 5,56E-01  | 1,88943308   | 1,25E+01  | 3,99E-04 | 7,60E-03 | AC152979.2 | 1,47 | Yes |
| ENSMUSG00000112229 | -3,19E-01 | 0,575099658  | 1,64E+00  | 2,01E-01 | 5,50E-01 | AC122197.1 | 0,80 | No  |
| ENSMUSG00000112234 | -7,33E-01 | -0,832036692 | 3,31E+00  | 6,90E-02 | 3,31E-01 | AC153938.1 | 0,60 | No  |
| ENSMUSG00000112237 | 1,69E-01  | -1,156082332 | 1,34E-01  | 7,14E-01 | 9,12E-01 | AC153911.1 | 1,12 | No  |
| ENSMUSG00000112239 | -1,41E-02 | 6,747944249  | 5,23E-02  | 8,19E-01 | 9,71E-01 | AC153524.3 | 0,99 | No  |
| ENSMUSG00000112241 | -6,49E-02 | 2,340497452  | 2,30E-01  | 6,32E-01 | 8,64E-01 | Sumo3      | 0,96 | No  |
| ENSMUSG00000112242 | -5,88E-02 | -3,033616507 | 1,62E-03  | 9,68E-01 | 1,00E+00 | AL589661.2 | 0,96 | No  |
| ENSMUSG00000112249 | -1,36E+00 | -2,831990899 | 1,15E+00  | 2,83E-01 | 5,79E-01 | AC158595.1 | 0,39 | No  |
| ENSMUSG00000112252 | -7,28E-02 | 2,542373415  | 3,22E-01  | 5,70E-01 | 8,31E-01 | AC153856.4 | 0,95 | No  |
| ENSMUSG00000112254 | -7,38E-02 | 0,309884438  | 7,13E-02  | 7,89E-01 | 9,54E-01 | AC124414.1 | 0,95 | No  |
| ENSMUSG00000112255 | -3,82E-02 | -2,401289442 | 1,69E-03  | 9,67E-01 | 1,00E+00 | AC124421.1 | 0,97 | No  |
| ENSMUSG00000112256 | -3,46E-01 | -2,600664646 | 1,51E-01  | 6,98E-01 | 9,04E-01 | AC151895.1 | 0,79 | No  |
| ENSMUSG00000112259 | -6,33E-02 | -1,205901254 | 2,06E-02  | 8,86E-01 | 1,00E+00 | AC168315.2 | 0,96 | No  |
| ENSMUSG00000112263 | 1,23E+00  | -1,333400054 | 5,45E+00  | 1,96E-02 | 1,49E-01 | AC134537.2 | 2,35 | No  |
| ENSMUSG00000112264 | -6,12E-01 | -0,267969618 | 3,96E+00  | 4,65E-02 | 2,57E-01 | AC153365.1 | 0,65 | No  |
| ENSMUSG00000112265 | 2,86E-01  | -2,448721591 | 8,33E-02  | 7,73E-01 | 9,44E-01 | AC101882.2 | 1,22 | No  |
| ENSMUSG00000112266 | -2,71E+00 | -3,033620915 | 2,92E+00  | 8,75E-02 | 3,78E-01 | AC091764.2 | 0,15 | No  |
| ENSMUSG00000112267 | 2,41E-01  | -1,548006972 | 1,95E-01  | 6,59E-01 | 8,81E-01 | AC153382.1 | 1,18 | No  |
| ENSMUSG00000112269 | -1,96E-02 | 2,188612073  | 1,90E-02  | 8,90E-01 | 1,00E+00 | AC153548.1 | 0,99 | No  |
| ENSMUSG00000112271 | -1,90E+00 | -2,963262532 | 1,44E+00  | 2,31E-01 | 5,50E-01 | AC159324.1 | 0,27 | No  |
| ENSMUSG00000112272 | -7,69E-02 | -2,963220349 | 2,69E-03  | 9,59E-01 | 1,00E+00 | AC127279.1 | 0,95 | No  |
| ENSMUSG00000112274 | 5,31E-01  | -2,247007687 | 4,30E-01  | 5,12E-01 | 7,95E-01 | AC120002.2 | 1,44 | No  |
| ENSMUSG00000112275 | -2,80E-02 | -2,655133592 | 6,89E-04  | 9,79E-01 | 1,00E+00 | AC122293.2 | 0,98 | No  |
| ENSMUSG00000112276 | -4,15E-01 | -0,600658147 | 1,04E+00  | 3,08E-01 | 6,06E-01 | AC117236.1 | 0,75 | No  |
| ENSMUSG00000112277 | 9,01E-03  | -3,107646452 | -5,16E-10 | 1,00E+00 | 1,00E+00 | AC159379.1 | 1,01 | No  |
| ENSMUSG00000112278 | -3,69E-01 | 0,136206421  | 1,73E+00  | 1,89E-01 | 5,50E-01 | AC163282.1 | 0,77 | No  |
| ENSMUSG00000112279 | -3,83E-02 | -3,107651936 | -7,91E-11 | 1,00E+00 | 1,00E+00 | AC159283.1 | 0,97 | No  |
| ENSMUSG00000112280 | -5,16E-01 | -0,755654992 | 1,81E+00  | 1,78E-01 | 5,38E-01 | AC153962.3 | 0,70 | No  |
| ENSMUSG00000112284 | 1,85E+00  | -3,107657832 | 1,35E+00  | 2,46E-01 | 5,50E-01 | AC091764.3 | 3,61 | No  |
| ENSMUSG00000112285 | 4,32E-01  | -2,822006444 | 1,10E-01  | 7,40E-01 | 9,26E-01 | CT030161.1 | 1,35 | No  |
| ENSMUSG00000112288 | 8,53E-02  | 0,202597336  | 1,04E-01  | 7,47E-01 | 9,30E-01 | AC134537.3 | 1,06 | No  |
| ENSMUSG00000112290 | -5,30E-01 | -0,613805799 | 2,29E+00  | 1,30E-01 | 4,53E-01 | AC153938.2 | 0,69 | No  |

|                    |           |              |           |          |          |            |      |    |
|--------------------|-----------|--------------|-----------|----------|----------|------------|------|----|
| ENSMUSG00000112294 | -4,27E-01 | -0,329373174 | 1,47E+00  | 2,25E-01 | 5,50E-01 | AC158802.1 | 0,74 | No |
| ENSMUSG00000112297 | 1,22E-01  | 4,522414416  | 2,31E+00  | 1,28E-01 | 4,50E-01 | CT572999.1 | 1,09 | No |
| ENSMUSG00000112298 | -2,42E-01 | 2,205258614  | 2,99E+00  | 8,36E-02 | 3,71E-01 | AC120406.1 | 0,85 | No |
| ENSMUSG00000112300 | 4,42E-01  | -2,448712668 | 1,53E-01  | 6,96E-01 | 9,03E-01 | AC160405.1 | 1,36 | No |
| ENSMUSG00000112301 | -8,26E-01 | -0,200470637 | 6,83E+00  | 8,97E-03 | 8,61E-02 | AC153497.1 | 0,56 | No |
| ENSMUSG00000112302 | 2,27E-01  | 1,478383543  | 1,65E+00  | 1,99E-01 | 5,50E-01 | AC148324.1 | 1,17 | No |
| ENSMUSG00000112303 | 9,01E-03  | -3,107646452 | -5,16E-10 | 1,00E+00 | 1,00E+00 | AC155929.3 | 1,01 | No |
| ENSMUSG00000112307 | 3,67E-02  | -2,963207527 | 2,07E-11  | 1,00E+00 | 1,00E+00 | AC112274.1 | 1,03 | No |
| ENSMUSG00000112308 | -1,94E-01 | 0,413835846  | 5,85E-01  | 4,44E-01 | 7,36E-01 | AC160138.1 | 0,87 | No |
| ENSMUSG00000112310 | -1,23E+00 | -3,146117124 | 7,12E-01  | 3,99E-01 | 6,98E-01 | CT571245.3 | 0,42 | No |
| ENSMUSG00000112311 | 2,49E-01  | -2,333161345 | 7,80E-02  | 7,80E-01 | 9,48E-01 | AC172027.2 | 1,19 | No |
| ENSMUSG00000112314 | -1,93E+00 | -2,963244023 | 1,47E+00  | 2,25E-01 | 5,50E-01 | AC155712.2 | 0,26 | No |
| ENSMUSG00000112316 | -1,89E+00 | -3,1076441   | 1,42E+00  | 2,33E-01 | 5,50E-01 | AC115970.1 | 0,27 | No |
| ENSMUSG00000112317 | 5,29E-01  | -1,205953435 | 1,12E+00  | 2,90E-01 | 5,86E-01 | AC153526.2 | 1,44 | No |
| ENSMUSG00000112318 | -1,89E+00 | -3,1076441   | 1,42E+00  | 2,33E-01 | 5,50E-01 | AC122408.1 | 0,27 | No |
| ENSMUSG00000112319 | 6,94E-01  | -2,963285211 | 2,59E-01  | 6,11E-01 | 8,52E-01 | AC152414.1 | 1,62 | No |
| ENSMUSG00000112323 | 2,23E-01  | -0,824143373 | 3,20E-01  | 5,71E-01 | 8,32E-01 | AC124134.1 | 1,17 | No |
| ENSMUSG00000112324 | -1,22E-02 | 3,347280782  | 1,41E-02  | 9,05E-01 | 1,00E+00 | AC153548.2 | 0,99 | No |
| ENSMUSG00000112326 | 3,89E-01  | -2,998000588 | 7,59E-02  | 7,83E-01 | 9,50E-01 | AC122408.2 | 1,31 | No |
| ENSMUSG00000112327 | -1,89E+00 | -3,1076441   | 1,42E+00  | 2,33E-01 | 5,50E-01 | AC153945.1 | 0,27 | No |
| ENSMUSG00000112328 | 1,81E+00  | -3,10765737  | 1,28E+00  | 2,58E-01 | 5,50E-01 | AC153840.2 | 3,49 | No |
| ENSMUSG00000112332 | 5,74E-02  | -1,548118562 | 9,59E-03  | 9,22E-01 | 1,00E+00 | AC153949.1 | 1,04 | No |
| ENSMUSG00000112336 | -1,37E-01 | 3,691367311  | 2,10E+00  | 1,47E-01 | 4,86E-01 | CT030161.2 | 0,91 | No |
| ENSMUSG00000112338 | -1,38E+00 | -1,655182381 | 5,48E+00  | 1,92E-02 | 1,47E-01 | AC116557.1 | 0,38 | No |
| ENSMUSG00000112339 | 4,90E-01  | -0,87987038  | 1,35E+00  | 2,45E-01 | 5,50E-01 | AC167202.3 | 1,40 | No |
| ENSMUSG00000112341 | 2,62E+00  | -3,033654625 | 2,66E+00  | 1,03E-01 | 3,95E-01 | AC115290.2 | 6,16 | No |
| ENSMUSG00000112342 | -8,46E-01 | -2,711744839 | 3,93E-01  | 5,31E-01 | 8,05E-01 | AC168058.1 | 0,56 | No |
| ENSMUSG00000112346 | 3,02E-01  | 1,034443972  | 2,14E+00  | 1,44E-01 | 4,79E-01 | AC153504.1 | 1,23 | No |
| ENSMUSG00000112347 | 2,74E-02  | -3,033621357 | 9,16E-12  | 1,00E+00 | 1,00E+00 | AC121961.1 | 1,02 | No |
| ENSMUSG00000112348 | -6,06E-02 | -2,770608669 | 2,49E-03  | 9,60E-01 | 1,00E+00 | AC158398.1 | 0,96 | No |
| ENSMUSG00000112349 | -1,06E-01 | -3,033634182 | 5,86E-03  | 9,39E-01 | 1,00E+00 | AC153532.2 | 0,93 | No |
| ENSMUSG00000112350 | 5,51E-01  | -0,413132833 | 2,44E+00  | 1,18E-01 | 4,28E-01 | AC159474.1 | 1,46 | No |

|                    |           |              |           |          |          |            |      |    |
|--------------------|-----------|--------------|-----------|----------|----------|------------|------|----|
| ENSMUSG00000112352 | -3,79E-01 | -1,998088919 | 3,33E-01  | 5,64E-01 | 8,26E-01 | AC153550.1 | 0,77 | No |
| ENSMUSG00000112354 | 1,27E-01  | -1,311131226 | 5,62E-02  | 8,13E-01 | 9,67E-01 | AC153365.2 | 1,09 | No |
| ENSMUSG00000112356 | 1,17E+00  | -3,070185219 | 6,52E-01  | 4,19E-01 | 7,15E-01 | AC167234.2 | 2,25 | No |
| ENSMUSG00000112358 | -3,83E-02 | -3,107651936 | -7,91E-11 | 1,00E+00 | 1,00E+00 | AC108802.1 | 0,97 | No |
| ENSMUSG00000112360 | -1,87E+00 | -3,107637761 | 1,39E+00  | 2,38E-01 | 5,50E-01 | AC153568.1 | 0,27 | No |
| ENSMUSG00000112363 | -3,84E+00 | -2,831968477 | 7,05E+00  | 7,95E-03 | 7,86E-02 | AC131760.1 | 0,07 | No |
| ENSMUSG00000112364 | -4,46E-02 | 4,511404725  | 3,12E-01  | 5,77E-01 | 8,35E-01 | AC158545.1 | 0,97 | No |
| ENSMUSG00000112365 | 1,63E+00  | -2,770587401 | 1,82E+00  | 1,77E-01 | 5,36E-01 | AC117232.4 | 3,09 | No |
| ENSMUSG00000112368 | 1,30E-01  | 0,607084784  | 3,00E-01  | 5,84E-01 | 8,38E-01 | AC166323.1 | 1,09 | No |
| ENSMUSG00000112370 | -1,94E+00 | -3,107619243 | 1,50E+00  | 2,21E-01 | 5,50E-01 | AC153557.1 | 0,26 | No |
| ENSMUSG00000112371 | 1,36E+00  | -2,60075498  | 1,88E+00  | 1,70E-01 | 5,26E-01 | AC153549.1 | 2,56 | No |
| ENSMUSG00000112374 | -1,91E+00 | -3,070159267 | 1,45E+00  | 2,29E-01 | 5,50E-01 | AC113107.1 | 0,27 | No |
| ENSMUSG00000112375 | -3,36E-04 | 0,334482475  | 1,69E-06  | 9,99E-01 | 1,00E+00 | AC158636.1 | 1,00 | No |
| ENSMUSG00000112379 | 2,02E-01  | -1,800993508 | 1,14E-01  | 7,36E-01 | 9,24E-01 | AC153512.1 | 1,15 | No |
| ENSMUSG00000112381 | -7,02E-01 | -2,226238286 | 8,38E-01  | 3,60E-01 | 6,61E-01 | AC171183.2 | 0,61 | No |
| ENSMUSG00000112384 | 2,91E+00  | -2,800989884 | 3,35E+00  | 6,73E-02 | 3,27E-01 | AC153821.2 | 7,50 | No |
| ENSMUSG00000112388 | -1,46E+00 | -2,929309018 | 9,91E-01  | 3,20E-01 | 6,20E-01 | AC163033.2 | 0,36 | No |
| ENSMUSG00000112391 | -3,57E+00 | -2,770570273 | 5,74E+00  | 1,66E-02 | 1,34E-01 | AC124572.2 | 0,08 | No |
| ENSMUSG00000112393 | -1,23E+00 | -2,65512133  | 1,46E+00  | 2,27E-01 | 5,50E-01 | AC159624.1 | 0,43 | No |
| ENSMUSG00000112395 | 1,21E-02  | -3,033650469 | 7,34E-11  | 1,00E+00 | 1,00E+00 | AC159139.1 | 1,01 | No |
| ENSMUSG00000112396 | -8,54E-02 | -2,107531391 | 1,71E-02  | 8,96E-01 | 1,00E+00 | AC122829.2 | 0,94 | No |
| ENSMUSG00000112400 | 4,17E-01  | -2,711706047 | 1,35E-01  | 7,13E-01 | 9,11E-01 | AC160863.2 | 1,33 | No |
| ENSMUSG00000112402 | -2,66E+00 | -3,033639428 | 2,81E+00  | 9,35E-02 | 3,83E-01 | AC154039.1 | 0,16 | No |
| ENSMUSG00000112404 | 1,81E+00  | -3,10765737  | 1,28E+00  | 2,58E-01 | 5,50E-01 | AC159282.1 | 3,49 | No |
| ENSMUSG00000112406 | 8,56E-01  | -0,896437213 | 3,49E+00  | 6,17E-02 | 3,09E-01 | AC168315.3 | 1,81 | No |
| ENSMUSG00000112410 | 1,87E+00  | -3,107639691 | 1,38E+00  | 2,40E-01 | 5,50E-01 | CT009504.3 | 3,67 | No |
| ENSMUSG00000112411 | -8,10E-01 | -1,683070126 | 1,56E+00  | 2,12E-01 | 5,50E-01 | AC155909.1 | 0,57 | No |
| ENSMUSG00000112413 | -1,70E+00 | -2,770551711 | 2,01E+00  | 1,56E-01 | 5,01E-01 | AC102369.3 | 0,31 | No |
| ENSMUSG00000112417 | -2,94E-01 | -2,711656375 | 7,35E-02  | 7,86E-01 | 9,52E-01 | AC110381.3 | 0,82 | No |
| ENSMUSG00000112419 | 2,88E-01  | 1,493126767  | 2,64E+00  | 1,04E-01 | 3,97E-01 | AC158600.2 | 1,22 | No |
| ENSMUSG00000112423 | -6,44E-02 | -2,832023595 | 2,81E-03  | 9,58E-01 | 1,00E+00 | AC122018.2 | 0,96 | No |
| ENSMUSG00000112424 | -5,07E-02 | 0,532964701  | 4,51E-02  | 8,32E-01 | 9,78E-01 | AC153367.1 | 0,97 | No |

|                    |           |              |           |          |          |            |       |      |     |
|--------------------|-----------|--------------|-----------|----------|----------|------------|-------|------|-----|
| ENSMUSG00000112425 | 3,36E-01  | -2,497532865 | 1,15E-01  | 7,35E-01 | 9,24E-01 | AC153512.3 |       | 1,26 | No  |
| ENSMUSG00000112429 | -1,39E-01 | 2,486456013  | 1,09E+00  | 2,97E-01 | 5,93E-01 | AC131081.1 |       | 0,91 | No  |
| ENSMUSG00000112433 | 2,32E-01  | -2,401435409 | 6,79E-02  | 7,94E-01 | 9,56E-01 | AC160405.2 |       | 1,17 | No  |
| ENSMUSG00000112435 | 1,88E+00  | -2,896120282 | 1,36E+00  | 2,43E-01 | 5,50E-01 | AC122210.3 |       | 3,67 | No  |
| ENSMUSG00000112437 | -2,63E-02 | -3,033653157 | 2,33E-04  | 9,88E-01 | 1,00E+00 | AC114002.3 |       | 0,98 | No  |
| ENSMUSG00000112440 | -8,67E-02 | -2,896148877 | 5,32E-03  | 9,42E-01 | 1,00E+00 | AC155941.1 |       | 0,94 | No  |
| ENSMUSG00000112441 | -3,57E+00 | -2,711703936 | 5,73E+00  | 1,66E-02 | 1,34E-01 | AC122860.2 |       | 0,08 | No  |
| ENSMUSG00000112442 | 9,64E-01  | -1,107777482 | 4,12E+00  | 4,23E-02 | 2,45E-01 | AC160405.3 |       | 1,95 | No  |
| ENSMUSG00000112445 | -3,16E+00 | -2,963246013 | 4,20E+00  | 4,04E-02 | 2,38E-01 | AC156274.1 |       | 0,11 | No  |
| ENSMUSG00000112446 | -3,12E-01 | 0,464633664  | 1,64E+00  | 2,01E-01 | 5,50E-01 | AC131690.1 |       | 0,81 | No  |
| ENSMUSG00000112449 | -1,49E-03 | 5,287343948  | 4,44E-04  | 9,83E-01 | 1,00E+00 | Srp54a     |       | 1,00 | No  |
| ENSMUSG00000112454 | -1,31E+00 | -2,770549804 | 1,07E+00  | 3,02E-01 | 5,98E-01 | AC155243.1 |       | 0,40 | No  |
| ENSMUSG00000112458 | -8,52E-01 | -2,896065901 | 3,98E-01  | 5,28E-01 | 8,04E-01 | AC135019.1 |       | 0,55 | No  |
| ENSMUSG00000112459 | 2,63E+00  | -2,89616029  | 2,68E+00  | 1,02E-01 | 3,94E-01 | AC124742.1 |       | 6,20 | No  |
| ENSMUSG00000112462 | 2,51E-01  | -2,929284068 | 3,79E-02  | 8,46E-01 | 9,87E-01 | AC139638.1 |       | 1,19 | No  |
| ENSMUSG00000112471 | -1,46E+00 | -1,185480161 | 8,64E+00  | 3,28E-03 | 4,11E-02 | AC137067.2 |       | 0,36 | Yes |
| ENSMUSG00000112474 | -1,06E-01 | 3,734915966  | 1,27E+00  | 2,60E-01 | 5,53E-01 | AC147512.2 |       | 0,93 | No  |
| ENSMUSG00000112478 | 1,64E-02  | 4,248748504  | 3,77E-02  | 8,46E-01 | 9,87E-01 | AC153370.2 |       | 1,01 | No  |
| ENSMUSG00000112481 | 2,36E-01  | -2,033662342 | 1,29E-01  | 7,19E-01 | 9,15E-01 | AC155710.1 |       | 1,18 | No  |
| ENSMUSG00000112488 | 1,81E+00  | -3,10765737  | 1,28E+00  | 2,58E-01 | 5,50E-01 | AC158607.1 |       | 3,49 | No  |
| ENSMUSG00000112489 | 3,01E-01  | -0,726337284 | 5,96E-01  | 4,40E-01 | 7,32E-01 | AC165249.1 |       | 1,23 | No  |
| ENSMUSG00000112491 | -2,90E-01 | 1,233357364  | 2,22E+00  | 1,36E-01 | 4,65E-01 | AC153548.4 |       | 0,82 | No  |
| ENSMUSG00000112492 | 6,21E-01  | -2,600723151 | 4,30E-01  | 5,12E-01 | 7,95E-01 | AC129304.1 |       | 1,54 | No  |
| ENSMUSG00000112495 | -1,07E-01 | 1,550125738  | 3,60E-01  | 5,49E-01 | 8,16E-01 | AC158600.3 |       | 0,93 | No  |
| ENSMUSG00000112496 | -4,18E-01 | -1,998093455 | 3,63E-01  | 5,47E-01 | 8,14E-01 | AC121569.2 |       | 0,75 | No  |
| ENSMUSG00000112500 | -5,47E-03 | -2,963221188 | 1,50E-05  | 9,97E-01 | 1,00E+00 | AC160146.1 |       | 1,00 | No  |
| ENSMUSG00000112501 | 3,97E-01  | -1,070215083 | 8,16E-01  | 3,66E-01 | 6,67E-01 | AC153940.1 |       | 1,32 | No  |
| ENSMUSG00000112502 | 6,87E-01  | -2,401433682 | 6,85E-01  | 4,08E-01 | 7,05E-01 | AC153889.4 |       | 1,61 | No  |
| ENSMUSG00000112505 | -7,38E-02 | -3,033659033 | 2,66E-03  | 9,59E-01 | 1,00E+00 | AC241534.3 |       | 0,95 | No  |
| ENSMUSG00000112506 | 9,01E-03  | -3,107646452 | -5,16E-10 | 1,00E+00 | 1,00E+00 | AC124346.2 |       | 1,01 | No  |
| ENSMUSG00000112508 | 1,19E-02  | 7,09070548   | 3,86E-02  | 8,44E-01 | 9,86E-01 |            | 37500 | 1,01 | No  |
| ENSMUSG00000112510 | -3,84E-01 | 2,625785905  | 9,67E+00  | 1,88E-03 | 2,66E-02 | AC122317.1 |       | 0,77 | Yes |

|                    |           |              |           |          |          |            |  |      |     |
|--------------------|-----------|--------------|-----------|----------|----------|------------|--|------|-----|
| ENSMUSG00000112512 | 1,22E+00  | -2,770611349 | 9,15E-01  | 3,39E-01 | 6,39E-01 | AC121844.3 |  | 2,32 | No  |
| ENSMUSG00000112513 | -7,38E-02 | -3,033659033 | 2,66E-03  | 9,59E-01 | 1,00E+00 | AC153364.1 |  | 0,95 | No  |
| ENSMUSG00000112514 | -8,31E-01 | -2,831965012 | 3,79E-01  | 5,38E-01 | 8,09E-01 | AC153512.4 |  | 0,56 | No  |
| ENSMUSG00000112515 | -1,91E-01 | 5,716390043  | 8,03E+00  | 4,59E-03 | 5,23E-02 | AC122235.1 |  | 0,88 | No  |
| ENSMUSG00000112516 | 1,08E-02  | -3,070174046 | -2,58E-10 | 1,00E+00 | 1,00E+00 | AC153522.2 |  | 1,01 | No  |
| ENSMUSG00000112517 | 3,52E-01  | -2,655081315 | 1,11E-01  | 7,39E-01 | 9,26E-01 | AC111092.1 |  | 1,28 | No  |
| ENSMUSG00000112519 | 1,85E+00  | -3,107657832 | 1,35E+00  | 2,46E-01 | 5,50E-01 | AC153937.5 |  | 3,61 | No  |
| ENSMUSG00000112522 | -1,91E+00 | -2,963238542 | 1,45E+00  | 2,29E-01 | 5,50E-01 | AC164629.7 |  | 0,27 | No  |
| ENSMUSG00000112523 | 7,20E-01  | -2,963285673 | 2,81E-01  | 5,96E-01 | 8,44E-01 | AC122024.3 |  | 1,65 | No  |
| ENSMUSG00000112527 | 2,63E+00  | -2,770614981 | 2,67E+00  | 1,02E-01 | 3,94E-01 | AC124413.2 |  | 6,19 | No  |
| ENSMUSG00000112528 | -7,44E-02 | -0,600842752 | 3,74E-02  | 8,47E-01 | 9,87E-01 | AC153521.1 |  | 0,95 | No  |
| ENSMUSG00000112530 | -2,71E-01 | -2,472894115 | 6,28E-02  | 8,02E-01 | 9,61E-01 | AC155941.2 |  | 0,83 | No  |
| ENSMUSG00000112535 | -1,89E+00 | -3,1076441   | 1,42E+00  | 2,33E-01 | 5,50E-01 | AC160028.3 |  | 0,27 | No  |
| ENSMUSG00000112536 | 1,87E+00  | -3,107639691 | 1,38E+00  | 2,40E-01 | 5,50E-01 | AC124445.1 |  | 3,67 | No  |
| ENSMUSG00000112537 | 7,81E-01  | -2,896104841 | 3,33E-01  | 5,64E-01 | 8,26E-01 | AC127568.2 |  | 1,72 | No  |
| ENSMUSG00000112539 | -3,98E-02 | -2,83199442  | 1,04E-03  | 9,74E-01 | 1,00E+00 | AC124413.3 |  | 0,97 | No  |
| ENSMUSG00000112541 | -1,44E+00 | -1,997912611 | 3,72E+00  | 5,38E-02 | 2,84E-01 | AC147782.3 |  | 0,37 | No  |
| ENSMUSG00000112543 | 1,85E+00  | -3,107657832 | 1,35E+00  | 2,46E-01 | 5,50E-01 | AC121986.1 |  | 3,61 | No  |
| ENSMUSG00000112544 | -7,01E-01 | -2,929308403 | 1,97E-01  | 6,57E-01 | 8,80E-01 | AC153821.3 |  | 0,62 | No  |
| ENSMUSG00000112545 | -1,03E+00 | -1,683008171 | 2,68E+00  | 1,01E-01 | 3,94E-01 | AC108401.3 |  | 0,49 | No  |
| ENSMUSG00000112546 | 2,07E-01  | 5,503098771  | 8,90E+00  | 2,84E-03 | 3,68E-02 | AC155293.1 |  | 1,15 | Yes |
| ENSMUSG00000112547 | -3,27E-01 | -1,6276348   | 3,12E-01  | 5,77E-01 | 8,35E-01 | AC164550.2 |  | 0,80 | No  |
| ENSMUSG00000112550 | 1,20E-02  | 6,17581692   | 3,49E-02  | 8,52E-01 | 9,90E-01 | AC153525.1 |  | 1,01 | No  |
| ENSMUSG00000112557 | 1,84E+00  | -2,896131242 | 1,33E+00  | 2,49E-01 | 5,50E-01 | AC153950.1 |  | 3,58 | No  |
| ENSMUSG00000112558 | 1,78E-01  | 1,475726287  | 9,65E-01  | 3,26E-01 | 6,27E-01 | AC153379.3 |  | 1,13 | No  |
| ENSMUSG00000112560 | -5,43E-01 | -1,03357115  | 1,53E+00  | 2,16E-01 | 5,50E-01 | AC153939.1 |  | 0,69 | No  |
| ENSMUSG00000112561 | -1,03E+00 | -1,929186515 | 2,71E+00  | 9,96E-02 | 3,92E-01 | AC153856.5 |  | 0,49 | No  |
| ENSMUSG00000112567 | -5,15E-01 | 1,039614236  | 6,28E+00  | 1,22E-02 | 1,08E-01 | CT571245.5 |  | 0,70 | No  |
| ENSMUSG00000112571 | -1,89E+00 | -3,033648118 | 1,42E+00  | 2,33E-01 | 5,50E-01 | AC140299.1 |  | 0,27 | No  |
| ENSMUSG00000112575 | 6,35E-01  | -1,929330054 | 8,18E-01  | 3,66E-01 | 6,67E-01 | AC153947.1 |  | 1,55 | No  |
| ENSMUSG00000112577 | -4,79E-02 | -2,711723388 | 2,05E-03  | 9,64E-01 | 1,00E+00 | AC155637.2 |  | 0,97 | No  |
| ENSMUSG00000112580 | 1,87E+00  | -3,107639691 | 1,38E+00  | 2,40E-01 | 5,50E-01 | AC164629.8 |  | 3,67 | No  |

|                    |           |              |           |          |          |            |      |     |
|--------------------|-----------|--------------|-----------|----------|----------|------------|------|-----|
| ENSMUSG00000112581 | 1,87E+00  | -3,107639691 | 1,38E+00  | 2,40E-01 | 5,50E-01 | AC124421.2 | 3,67 | No  |
| ENSMUSG00000112583 | 2,03E-01  | -1,929306764 | 1,05E-01  | 7,46E-01 | 9,29E-01 | AC147101.2 | 1,15 | No  |
| ENSMUSG00000112593 | -1,46E-01 | -1,770573896 | 5,31E-02  | 8,18E-01 | 9,70E-01 | AC153366.1 | 0,90 | No  |
| ENSMUSG00000112594 | -4,13E-02 | -3,033659495 | 7,08E-04  | 9,79E-01 | 1,00E+00 | AC159114.1 | 0,97 | No  |
| ENSMUSG00000112596 | 4,37E-01  | -2,770644442 | 1,49E-01  | 6,99E-01 | 9,04E-01 | AC153494.1 | 1,35 | No  |
| ENSMUSG00000112597 | -2,32E+00 | -2,896143109 | 2,12E+00  | 1,46E-01 | 4,83E-01 | AC153974.2 | 0,20 | No  |
| ENSMUSG00000112605 | 1,85E-03  | 4,053549084  | 4,52E-04  | 9,83E-01 | 1,00E+00 | CR974589.1 | 1,00 | No  |
| ENSMUSG00000112606 | 1,81E+00  | -3,10765737  | 1,28E+00  | 2,58E-01 | 5,50E-01 | AC125361.2 | 3,49 | No  |
| ENSMUSG00000112611 | 9,01E-03  | -3,107646452 | -5,16E-10 | 1,00E+00 | 1,00E+00 | AC166263.2 | 1,01 | No  |
| ENSMUSG00000112612 | 3,30E-01  | 1,167773482  | 2,62E+00  | 1,05E-01 | 3,97E-01 | AC159334.1 | 1,26 | No  |
| ENSMUSG00000112613 | 1,06E+00  | -2,355617606 | 1,44E+00  | 2,31E-01 | 5,50E-01 | AC151901.1 | 2,08 | No  |
| ENSMUSG00000112614 | 4,50E-02  | 3,06577088   | 1,63E-01  | 6,86E-01 | 8,97E-01 | AC153856.6 | 1,03 | No  |
| ENSMUSG00000112616 | -4,08E-02 | -2,89610675  | 1,04E-03  | 9,74E-01 | 1,00E+00 | AC160028.4 | 0,97 | No  |
| ENSMUSG00000112619 | -3,21E+00 | -2,600642939 | 4,33E+00  | 3,75E-02 | 2,30E-01 | AC122829.3 | 0,11 | No  |
| ENSMUSG00000112620 | -5,98E-02 | 1,551356778  | 1,20E-01  | 7,29E-01 | 9,20E-01 | AC160404.1 | 0,96 | No  |
| ENSMUSG00000112621 | -1,71E+00 | -2,088802444 | 4,43E+00  | 3,53E-02 | 2,22E-01 | AC167202.5 | 0,31 | No  |
| ENSMUSG00000112622 | -3,33E-02 | -2,655137237 | 8,03E-04  | 9,77E-01 | 1,00E+00 | AC122850.1 | 0,98 | No  |
| ENSMUSG00000112627 | -5,25E-01 | 1,004364744  | 6,26E+00  | 1,23E-02 | 1,09E-01 | AC123720.1 | 0,70 | No  |
| ENSMUSG00000112629 | -1,89E+00 | -3,1076441   | 1,42E+00  | 2,33E-01 | 5,50E-01 | AC105167.1 | 0,27 | No  |
| ENSMUSG00000112634 | -1,89E+00 | -2,832004429 | 1,43E+00  | 2,32E-01 | 5,50E-01 | AC155941.3 | 0,27 | No  |
| ENSMUSG00000112637 | -1,55E+00 | -1,896042779 | 4,45E+00  | 3,48E-02 | 2,20E-01 | AC124346.3 | 0,34 | No  |
| ENSMUSG00000112639 | 6,49E-01  | -0,954737209 | 2,44E+00  | 1,18E-01 | 4,27E-01 | AC134329.1 | 1,57 | No  |
| ENSMUSG00000112640 | 2,21E-01  | 1,979384401  | 2,24E+00  | 1,34E-01 | 4,61E-01 | AC172027.3 | 1,17 | No  |
| ENSMUSG00000112641 | -1,27E+00 | -3,146104694 | 7,49E-01  | 3,87E-01 | 6,87E-01 | AC160411.1 | 0,42 | No  |
| ENSMUSG00000112642 | -1,24E+00 | -2,146134187 | 1,48E+00  | 2,23E-01 | 5,50E-01 | AC124399.3 | 0,42 | No  |
| ENSMUSG00000112645 | -1,94E+00 | -3,107619243 | 1,50E+00  | 2,21E-01 | 5,50E-01 | AC152979.4 | 0,26 | No  |
| ENSMUSG00000112648 | 1,81E+00  | -3,10765737  | 1,28E+00  | 2,58E-01 | 5,50E-01 | AC152062.1 | 3,49 | No  |
| ENSMUSG00000112650 | 2,13E-01  | 2,082705292  | 2,03E+00  | 1,54E-01 | 4,97E-01 | AC114575.3 | 1,16 | No  |
| ENSMUSG00000112652 | 3,46E-01  | 4,504340669  | 1,84E+01  | 1,83E-05 | 5,74E-04 | AC160411.2 | 1,27 | Yes |
| ENSMUSG00000112654 | 4,14E-03  | 1,542492382  | 5,54E-04  | 9,81E-01 | 1,00E+00 | AC153557.3 | 1,00 | No  |
| ENSMUSG00000112656 | 5,02E-02  | 0,266552643  | 3,49E-02  | 8,52E-01 | 9,90E-01 | AC107864.1 | 1,04 | No  |
| ENSMUSG00000112657 | 1,87E+00  | -3,107639691 | 1,38E+00  | 2,40E-01 | 5,50E-01 | AC166361.2 | 3,67 | No  |

|                    |           |              |           |          |          |             |      |    |
|--------------------|-----------|--------------|-----------|----------|----------|-------------|------|----|
| ENSMUSG00000112660 | 1,63E+00  | -2,448699395 | 1,81E+00  | 1,78E-01 | 5,39E-01 | AC160410.1  | 3,09 | No |
| ENSMUSG00000112662 | 2,94E-01  | -2,60069793  | 8,77E-02  | 7,67E-01 | 9,40E-01 | AC164573.1  | 1,23 | No |
| ENSMUSG00000112666 | 3,14E-02  | -3,107617333 | -7,69E-10 | 1,00E+00 | 1,00E+00 | AC132384.16 | 1,02 | No |
| ENSMUSG00000112667 | -1,72E+00 | -2,770622427 | 2,06E+00  | 1,51E-01 | 4,93E-01 | AC153532.3  | 0,30 | No |
| ENSMUSG00000112669 | 2,63E-01  | -0,401433062 | 5,66E-01  | 4,52E-01 | 7,41E-01 | AC159542.1  | 1,20 | No |
| ENSMUSG00000112670 | 2,58E-01  | -2,548227759 | 8,39E-02  | 7,72E-01 | 9,43E-01 | AC158593.1  | 1,20 | No |
| ENSMUSG00000112673 | -9,72E-02 | 2,564608408  | 5,93E-01  | 4,41E-01 | 7,33E-01 | AC155939.1  | 0,93 | No |
| ENSMUSG00000112674 | 2,27E-01  | -1,00683916  | 2,67E-01  | 6,05E-01 | 8,49E-01 | AC153887.3  | 1,17 | No |
| ENSMUSG00000112677 | 5,09E-02  | -1,54815325  | 9,39E-03  | 9,23E-01 | 1,00E+00 | AC155710.2  | 1,04 | No |
| ENSMUSG00000112679 | -1,87E+00 | -3,107637761 | 1,39E+00  | 2,38E-01 | 5,50E-01 | AC155644.2  | 0,27 | No |
| ENSMUSG00000112682 | 5,81E-01  | -1,896136677 | 5,71E-01  | 4,50E-01 | 7,40E-01 | AC153940.2  | 1,50 | No |
| ENSMUSG00000112683 | 1,20E+00  | -2,655207295 | 8,95E-01  | 3,44E-01 | 6,45E-01 | AC160060.3  | 2,30 | No |
| ENSMUSG00000112684 | -3,19E-01 | -1,07014766  | 5,04E-01  | 4,78E-01 | 7,66E-01 | AC158804.2  | 0,80 | No |
| ENSMUSG00000112690 | 1,61E-01  | 1,502073545  | 8,53E-01  | 3,56E-01 | 6,57E-01 | AC174776.1  | 1,12 | No |
| ENSMUSG00000112691 | 1,29E-01  | -1,863752134 | 2,90E-02  | 8,65E-01 | 9,98E-01 | AC153548.5  | 1,09 | No |
| ENSMUSG00000112693 | 1,02E-01  | 3,788496318  | 1,21E+00  | 2,71E-01 | 5,68E-01 | AC135633.1  | 1,07 | No |
| ENSMUSG00000112696 | 1,36E-02  | -2,963265738 | -4,74E-10 | 1,00E+00 | 1,00E+00 | AC160970.1  | 1,01 | No |
| ENSMUSG00000112697 | -5,75E-01 | -1,863701314 | 7,77E-01  | 3,78E-01 | 6,79E-01 | AC172027.4  | 0,67 | No |
| ENSMUSG00000112698 | -4,46E-01 | -2,185562099 | 2,85E-01  | 5,93E-01 | 8,43E-01 | AC122734.1  | 0,73 | No |
| ENSMUSG00000112705 | -1,89E+00 | -3,1076441   | 1,42E+00  | 2,33E-01 | 5,50E-01 | AC119892.1  | 0,27 | No |
| ENSMUSG00000112709 | -5,03E-01 | -1,31136138  | 1,23E+00  | 2,68E-01 | 5,64E-01 | AC105169.2  | 0,71 | No |
| ENSMUSG00000112710 | 5,14E-01  | -0,344485789 | 2,16E+00  | 1,41E-01 | 4,75E-01 | AC165164.3  | 1,43 | No |
| ENSMUSG00000112711 | -2,66E+00 | -2,9632547   | 2,82E+00  | 9,28E-02 | 3,83E-01 | AC135019.3  | 0,16 | No |
| ENSMUSG00000112712 | -5,88E-01 | 0,906950243  | 7,93E+00  | 4,86E-03 | 5,49E-02 | AC152945.2  | 0,67 | No |
| ENSMUSG00000112714 | 2,00E-01  | 3,321181889  | 3,63E+00  | 5,68E-02 | 2,93E-01 | AC127224.2  | 1,15 | No |
| ENSMUSG00000112715 | -3,83E-02 | -3,107651936 | -7,91E-11 | 1,00E+00 | 1,00E+00 | AC125486.1  | 0,97 | No |
| ENSMUSG00000112716 | 1,42E+00  | -2,226385282 | 2,87E+00  | 9,03E-02 | 3,81E-01 | AC134528.2  | 2,67 | No |
| ENSMUSG00000112719 | -6,26E-02 | -2,711728588 | 3,56E-03  | 9,52E-01 | 1,00E+00 | AC159283.2  | 0,96 | No |
| ENSMUSG00000112725 | -1,87E+00 | -3,107637761 | 1,39E+00  | 2,38E-01 | 5,50E-01 | AC167222.3  | 0,27 | No |
| ENSMUSG00000112727 | 2,68E-01  | -0,634536306 | 4,33E-01  | 5,10E-01 | 7,94E-01 | AC153369.2  | 1,20 | No |
| ENSMUSG00000112728 | -2,65E+00 | -3,033633091 | 2,78E+00  | 9,55E-02 | 3,86E-01 | AC123694.2  | 0,16 | No |
| ENSMUSG00000112731 | -1,92E-01 | -2,289483641 | 5,73E-02  | 8,11E-01 | 9,66E-01 | AC155941.4  | 0,88 | No |



|                    |           |              |           |          |          |            |      |     |
|--------------------|-----------|--------------|-----------|----------|----------|------------|------|-----|
| ENSMUSG00000112733 | -1,44E-02 | -2,998007972 | 1,15E-11  | 1,00E+00 | 1,00E+00 | AC155941.5 | 0,99 | No  |
| ENSMUSG00000112734 | -1,97E+00 | -1,655036724 | 9,19E+00  | 2,43E-03 | 3,26E-02 | AC153524.4 | 0,25 | Yes |
| ENSMUSG00000112736 | -7,77E-02 | 0,950535207  | 1,36E-01  | 7,12E-01 | 9,11E-01 | AC159379.2 | 0,95 | No  |
| ENSMUSG00000112739 | -1,71E+00 | -2,627597049 | 2,03E+00  | 1,54E-01 | 4,98E-01 | AC155941.6 | 0,31 | No  |
| ENSMUSG00000112740 | -3,10E-01 | -1,654942875 | 2,69E-01  | 6,04E-01 | 8,49E-01 | AC172027.5 | 0,81 | No  |
| ENSMUSG00000112742 | 1,12E+00  | -2,655157001 | 1,19E+00  | 2,76E-01 | 5,72E-01 | AC226737.1 | 2,17 | No  |
| ENSMUSG00000112743 | 2,40E-01  | 1,09541971   | 1,45E+00  | 2,28E-01 | 5,50E-01 | AC152453.1 | 1,18 | No  |
| ENSMUSG00000112744 | -7,51E-02 | -1,473096362 | 1,84E-02  | 8,92E-01 | 1,00E+00 | AC153366.2 | 0,95 | No  |
| ENSMUSG00000112746 | -1,89E+00 | -3,1076441   | 1,42E+00  | 2,33E-01 | 5,50E-01 | AC157213.1 | 0,27 | No  |
| ENSMUSG00000112748 | 3,36E-01  | -0,816365479 | 6,64E-01  | 4,15E-01 | 7,10E-01 | AC079680.5 | 1,26 | No  |
| ENSMUSG00000112749 | -1,68E+00 | -0,145767732 | 2,73E+01  | 1,74E-07 | 9,17E-06 | AC153938.3 | 0,31 | Yes |
| ENSMUSG00000112751 | -4,11E-02 | -3,07017516  | 6,23E-04  | 9,80E-01 | 1,00E+00 | AC101709.1 | 0,97 | No  |
| ENSMUSG00000112754 | 2,66E-01  | -0,655170003 | 4,98E-01  | 4,80E-01 | 7,68E-01 | CT010450.1 | 1,20 | No  |
| ENSMUSG00000112756 | 1,83E+00  | -2,96327665  | 1,33E+00  | 2,49E-01 | 5,50E-01 | AC125487.2 | 3,57 | No  |
| ENSMUSG00000112758 | -8,88E-01 | -1,378266739 | 2,40E+00  | 1,21E-01 | 4,35E-01 | AC159502.1 | 0,54 | No  |
| ENSMUSG00000112759 | -1,86E-01 | -1,448637457 | 9,26E-02  | 7,61E-01 | 9,37E-01 | AC153516.1 | 0,88 | No  |
| ENSMUSG00000112760 | 4,91E-02  | -0,831940783 | 1,46E-02  | 9,04E-01 | 1,00E+00 | AC172027.6 | 1,03 | No  |
| ENSMUSG00000112762 | -1,44E+00 | -1,963152205 | 3,71E+00  | 5,42E-02 | 2,85E-01 | AC131596.1 | 0,37 | No  |
| ENSMUSG00000112764 | -1,94E+00 | -3,107619243 | 1,50E+00  | 2,21E-01 | 5,50E-01 | AC144461.2 | 0,26 | No  |
| ENSMUSG00000112765 | -4,05E-01 | -0,785457368 | 1,16E+00  | 2,82E-01 | 5,78E-01 | AC122832.3 | 0,76 | No  |
| ENSMUSG00000112766 | 1,34E-01  | 5,929573058  | 4,09E+00  | 4,30E-02 | 2,47E-01 | AC153530.2 | 1,10 | No  |
| ENSMUSG00000112770 | 5,93E-01  | -1,378352099 | 1,64E+00  | 2,00E-01 | 5,50E-01 | CT572999.2 | 1,51 | No  |
| ENSMUSG00000112779 | -3,83E-02 | -3,107651936 | -7,91E-11 | 1,00E+00 | 1,00E+00 | AC125020.3 | 0,97 | No  |
| ENSMUSG00000112781 | -5,92E-02 | 0,966491418  | 8,12E-02  | 7,76E-01 | 9,45E-01 | AC158600.4 | 0,96 | No  |
| ENSMUSG00000112782 | -3,88E-03 | -3,03362684  | 4,02E-12  | 1,00E+00 | 1,00E+00 | AC153962.4 | 1,00 | No  |
| ENSMUSG00000112784 | -7,60E-02 | -1,424853223 | 2,43E-02  | 8,76E-01 | 1,00E+00 | AC120002.3 | 0,95 | No  |
| ENSMUSG00000112786 | 1,57E+00  | -2,401410485 | 2,68E+00  | 1,02E-01 | 3,94E-01 | AC153544.3 | 2,96 | No  |
| ENSMUSG00000112789 | 1,83E+00  | -2,896143428 | 1,32E+00  | 2,50E-01 | 5,50E-01 | AC142499.2 | 3,55 | No  |
| ENSMUSG00000112790 | -6,12E-01 | -1,247071984 | 1,68E+00  | 1,95E-01 | 5,50E-01 | AC171183.3 | 0,65 | No  |
| ENSMUSG00000112793 | 1,22E+00  | -3,146114919 | 6,90E-01  | 4,06E-01 | 7,02E-01 | AC098712.1 | 2,33 | No  |
| ENSMUSG00000112795 | 4,29E-02  | 1,127743666  | 4,56E-02  | 8,31E-01 | 9,78E-01 | CT010444.3 | 1,03 | No  |
| ENSMUSG00000112796 | 1,03E+00  | -2,355677558 | 1,36E+00  | 2,43E-01 | 5,50E-01 | AC123694.3 | 2,04 | No  |

|                    |           |              |           |          |          |            |      |    |
|--------------------|-----------|--------------|-----------|----------|----------|------------|------|----|
| ENSMUSG00000112797 | -1,94E+00 | -3,107619243 | 1,50E+00  | 2,21E-01 | 5,50E-01 | AC152953.2 | 0,26 | No |
| ENSMUSG00000112804 | 1,87E+00  | -3,107639691 | 1,38E+00  | 2,40E-01 | 5,50E-01 | AC101709.2 | 3,67 | No |
| ENSMUSG00000112805 | 1,26E+00  | -2,770576036 | 9,79E-01  | 3,23E-01 | 6,23E-01 | AC153504.2 | 2,39 | No |
| ENSMUSG00000112806 | -5,37E-01 | 0,527194026  | 4,99E+00  | 2,55E-02 | 1,77E-01 | AC122539.3 | 0,69 | No |
| ENSMUSG00000112808 | 1,35E-01  | 6,487012526  | 4,61E+00  | 3,19E-02 | 2,07E-01 | AC153546.1 | 1,10 | No |
| ENSMUSG00000112811 | -1,45E+00 | -2,107593419 | 3,74E+00  | 5,31E-02 | 2,81E-01 | CT010497.1 | 0,37 | No |
| ENSMUSG00000112813 | -5,70E-01 | -2,770642473 | 2,54E-01  | 6,14E-01 | 8,53E-01 | AC153509.2 | 0,67 | No |
| ENSMUSG00000112814 | 3,19E-01  | 1,520723125  | 3,34E+00  | 6,74E-02 | 3,27E-01 | AC158600.5 | 1,25 | No |
| ENSMUSG00000112815 | -8,86E-02 | -2,963249454 | 3,57E-03  | 9,52E-01 | 1,00E+00 | AC158803.3 | 0,94 | No |
| ENSMUSG00000112816 | 4,53E-01  | -1,963295424 | 4,23E-01  | 5,16E-01 | 7,97E-01 | AC156952.1 | 1,37 | No |
| ENSMUSG00000112819 | 1,87E+00  | -3,107639691 | 1,38E+00  | 2,40E-01 | 5,50E-01 | AC241534.4 | 3,67 | No |
| ENSMUSG00000112820 | 1,09E+00  | -2,448711042 | 1,14E+00  | 2,86E-01 | 5,82E-01 | AC125108.1 | 2,13 | No |
| ENSMUSG00000112822 | -1,06E-01 | -0,57417749  | 9,54E-02  | 7,57E-01 | 9,35E-01 | AC126943.1 | 0,93 | No |
| ENSMUSG00000112823 | 4,37E-02  | 1,360251376  | 6,00E-02  | 8,06E-01 | 9,64E-01 | AC156563.1 | 1,03 | No |
| ENSMUSG00000112824 | 8,09E-01  | -1,800988473 | 1,82E+00  | 1,77E-01 | 5,37E-01 | AC164624.1 | 1,75 | No |
| ENSMUSG00000112825 | -7,43E-02 | 6,473974686  | 1,40E+00  | 2,37E-01 | 5,50E-01 | AC152949.2 | 0,95 | No |
| ENSMUSG00000112826 | -1,89E+00 | -3,1076441   | 1,42E+00  | 2,33E-01 | 5,50E-01 | AC122408.3 | 0,27 | No |
| ENSMUSG00000112827 | 9,01E-03  | -3,107646452 | -5,16E-10 | 1,00E+00 | 1,00E+00 | AC112274.2 | 1,01 | No |
| ENSMUSG00000112828 | 2,17E-01  | -2,401387445 | 5,89E-02  | 8,08E-01 | 9,65E-01 | AC151828.1 | 1,16 | No |
| ENSMUSG00000112829 | 1,23E-01  | 3,42490982   | 1,48E+00  | 2,24E-01 | 5,50E-01 | AC162932.2 | 1,09 | No |
| ENSMUSG00000112830 | -3,74E-01 | -1,963292435 | 3,25E-01  | 5,69E-01 | 8,30E-01 | AC108401.4 | 0,77 | No |
| ENSMUSG00000112836 | -1,87E+00 | -3,033619006 | 1,41E+00  | 2,36E-01 | 5,50E-01 | AC122408.4 | 0,27 | No |
| ENSMUSG00000112842 | 1,82E+00  | -3,033667329 | 1,31E+00  | 2,52E-01 | 5,50E-01 | AC025913.5 | 3,54 | No |
| ENSMUSG00000112843 | 2,94E-01  | 2,523903823  | 5,29E+00  | 2,15E-02 | 1,58E-01 | AC152979.5 | 1,23 | No |
| ENSMUSG00000112844 | 1,62E+00  | -2,711721818 | 1,81E+00  | 1,78E-01 | 5,39E-01 | AC154313.2 | 3,08 | No |
| ENSMUSG00000112847 | 5,69E-01  | -2,03372652  | 7,36E-01  | 3,91E-01 | 6,91E-01 | AC158605.2 | 1,48 | No |
| ENSMUSG00000112850 | 2,00E-01  | -1,107716231 | 2,05E-01  | 6,51E-01 | 8,76E-01 | AC117232.5 | 1,15 | No |
| ENSMUSG00000112851 | 1,14E-01  | 1,69186702   | 4,52E-01  | 5,01E-01 | 7,86E-01 | AC133080.1 | 1,08 | No |
| ENSMUSG00000112852 | -1,84E-01 | 2,604105486  | 2,12E+00  | 1,46E-01 | 4,83E-01 | CT030161.3 | 0,88 | No |
| ENSMUSG00000112854 | 1,85E+00  | -3,107657832 | 1,35E+00  | 2,46E-01 | 5,50E-01 | AC154039.2 | 3,61 | No |
| ENSMUSG00000112857 | -3,83E-02 | -3,107651936 | -7,91E-11 | 1,00E+00 | 1,00E+00 | AC124556.2 | 0,97 | No |
| ENSMUSG00000112858 | -8,39E-01 | -2,831973646 | 3,86E-01  | 5,34E-01 | 8,07E-01 | Gm10332    | 0,56 | No |

|                    |           |              |           |          |          |             |      |     |
|--------------------|-----------|--------------|-----------|----------|----------|-------------|------|-----|
| ENSMUSG00000112860 | -4,79E-01 | 0,128336721  | 2,76E+00  | 9,68E-02 | 3,88E-01 | AC122317.2  | 0,72 | No  |
| ENSMUSG00000112863 | -1,78E-01 | 0,344874621  | 4,96E-01  | 4,81E-01 | 7,69E-01 | AC134457.3  | 0,88 | No  |
| ENSMUSG00000112869 | -3,83E-02 | -3,107651936 | -7,91E-11 | 1,00E+00 | 1,00E+00 | AC164567.6  | 0,97 | No  |
| ENSMUSG00000112875 | 2,65E+00  | -2,711679154 | 2,71E+00  | 9,95E-02 | 3,92E-01 | AC122197.2  | 6,30 | No  |
| ENSMUSG00000112876 | 2,74E-02  | -3,033621357 | 9,16E-12  | 1,00E+00 | 1,00E+00 | AC155293.3  | 1,02 | No  |
| ENSMUSG00000112877 | -1,87E+00 | -2,963234282 | 1,41E+00  | 2,35E-01 | 5,50E-01 | AC174742.1  | 0,27 | No  |
| ENSMUSG00000112879 | -9,02E-02 | -2,401375236 | 9,28E-03  | 9,23E-01 | 1,00E+00 | AC158802.2  | 0,94 | No  |
| ENSMUSG00000112880 | 1,82E-01  | -0,460844581 | 2,69E-01  | 6,04E-01 | 8,49E-01 | AC127337.2  | 1,13 | No  |
| ENSMUSG00000112881 | -2,49E+00 | -1,963145994 | 5,37E+00  | 2,05E-02 | 1,54E-01 | AC139376.1  | 0,18 | No  |
| ENSMUSG00000112889 | 3,38E-01  | -2,600700086 | 1,17E-01  | 7,33E-01 | 9,23E-01 | AC158636.2  | 1,26 | No  |
| ENSMUSG00000112891 | 1,55E+00  | -2,497687049 | 2,63E+00  | 1,05E-01 | 3,97E-01 | AC140354.1  | 2,94 | No  |
| ENSMUSG00000112892 | -5,86E-01 | -1,146059739 | 1,62E+00  | 2,02E-01 | 5,50E-01 | AC123036.2  | 0,67 | No  |
| ENSMUSG00000112893 | 8,34E-02  | 0,33430526   | 1,02E-01  | 7,50E-01 | 9,31E-01 | AC132384.20 | 1,06 | No  |
| ENSMUSG00000112894 | 2,92E+00  | -2,740834357 | 3,37E+00  | 6,65E-02 | 3,24E-01 | AC144942.1  | 7,56 | No  |
| ENSMUSG00000112895 | -7,37E-01 | 1,154922109  | 1,34E+01  | 2,55E-04 | 5,31E-03 | AC122317.3  | 0,60 | Yes |
| ENSMUSG00000112900 | -2,74E+00 | -3,033596063 | 2,99E+00  | 8,38E-02 | 3,71E-01 | AC140299.2  | 0,15 | No  |
| ENSMUSG00000112903 | 1,87E+00  | -3,107639691 | 1,38E+00  | 2,40E-01 | 5,50E-01 | AC153975.3  | 3,67 | No  |
| ENSMUSG00000112905 | -3,83E-02 | -3,107651936 | -7,91E-11 | 1,00E+00 | 1,00E+00 | AC117199.1  | 0,97 | No  |
| ENSMUSG00000112906 | 6,59E-01  | -1,473007399 | 1,67E+00  | 1,96E-01 | 5,50E-01 | AC133511.1  | 1,58 | No  |
| ENSMUSG00000112907 | -2,66E+00 | -2,600684172 | 6,52E+00  | 1,07E-02 | 9,82E-02 | AC164623.1  | 0,16 | No  |
| ENSMUSG00000112908 | -1,52E-01 | 4,623744097  | 3,79E+00  | 5,15E-02 | 2,76E-01 | AC126687.1  | 0,90 | No  |
| ENSMUSG00000112909 | -9,40E-02 | 4,600606826  | 1,41E+00  | 2,35E-01 | 5,50E-01 | AC131120.2  | 0,94 | No  |
| ENSMUSG00000112910 | -1,18E+00 | -2,448707648 | 1,79E+00  | 1,81E-01 | 5,43E-01 | AC113439.1  | 0,44 | No  |
| ENSMUSG00000112916 | 1,85E+00  | -3,107657832 | 1,35E+00  | 2,46E-01 | 5,50E-01 | AC155258.3  | 3,61 | No  |
| ENSMUSG00000112917 | -1,89E+00 | -3,1076441   | 1,42E+00  | 2,33E-01 | 5,50E-01 | AC152951.2  | 0,27 | No  |
| ENSMUSG00000112918 | 1,34E-02  | -2,963213009 | -8,25E-12 | 1,00E+00 | 1,00E+00 | AC153529.1  | 1,01 | No  |
| ENSMUSG00000112919 | -4,42E-02 | 2,058356551  | 8,92E-02  | 7,65E-01 | 9,40E-01 | AC158600.6  | 0,97 | No  |
| ENSMUSG00000112922 | -2,49E-01 | -0,573952773 | 4,77E-01  | 4,90E-01 | 7,76E-01 | AC158605.3  | 0,84 | No  |
| ENSMUSG00000112925 | -4,59E-01 | 0,688893968  | 3,74E+00  | 5,31E-02 | 2,81E-01 | AC153382.2  | 0,73 | No  |
| ENSMUSG00000112926 | -4,02E-01 | -0,289122602 | 1,51E+00  | 2,19E-01 | 5,50E-01 | CT571252.1  | 0,76 | No  |
| ENSMUSG00000112927 | 3,14E-02  | -3,107617333 | -7,69E-10 | 1,00E+00 | 1,00E+00 | AC153529.2  | 1,02 | No  |
| ENSMUSG00000112930 | 1,82E+00  | -2,963253027 | 1,31E+00  | 2,52E-01 | 5,50E-01 | AC164597.1  | 3,53 | No  |

|                    |           |              |           |          |          |            |       |     |
|--------------------|-----------|--------------|-----------|----------|----------|------------|-------|-----|
| ENSMUSG00000112932 | 4,94E-01  | -1,896131191 | 6,14E-01  | 4,33E-01 | 7,27E-01 | AC139754.4 | 1,41  | No  |
| ENSMUSG00000112937 | 3,50E+00  | -2,832044636 | 5,33E+00  | 2,09E-02 | 1,56E-01 | CT010478.1 | 11,35 | No  |
| ENSMUSG00000112942 | -5,70E-01 | -2,770636535 | 2,54E-01  | 6,14E-01 | 8,53E-01 | AC132121.1 | 0,67  | No  |
| ENSMUSG00000112943 | -4,01E-02 | -2,963238858 | 7,31E-04  | 9,78E-01 | 1,00E+00 | AC126554.1 | 0,97  | No  |
| ENSMUSG00000112944 | -7,58E-01 | -2,355568373 | 6,43E-01  | 4,22E-01 | 7,18E-01 | AL645643.1 | 0,59  | No  |
| ENSMUSG00000112946 | 1,87E+00  | -3,03364371  | 1,36E+00  | 2,43E-01 | 5,50E-01 | AC134596.1 | 3,66  | No  |
| ENSMUSG00000112948 | 4,12E-01  | -2,600671737 | 1,33E-01  | 7,15E-01 | 9,13E-01 | AC124579.1 | 1,33  | No  |
| ENSMUSG00000112949 | 3,14E-02  | -3,107617333 | -7,69E-10 | 1,00E+00 | 1,00E+00 | AC211878.1 | 1,02  | No  |
| ENSMUSG00000112955 | -8,56E-01 | -2,655111156 | 4,01E-01  | 5,26E-01 | 8,03E-01 | AC124446.1 | 0,55  | No  |
| ENSMUSG00000112959 | 3,81E-02  | -0,338808809 | 1,38E-02  | 9,07E-01 | 1,00E+00 | AC159104.1 | 1,03  | No  |
| ENSMUSG00000112963 | -2,02E-01 | 1,985069482  | 1,69E+00  | 1,94E-01 | 5,50E-01 | AL513022.1 | 0,87  | No  |
| ENSMUSG00000112964 | -1,51E-01 | 2,159715268  | 1,18E+00  | 2,77E-01 | 5,74E-01 | CT009718.1 | 0,90  | No  |
| ENSMUSG00000112969 | -2,29E-02 | 1,99535832   | 2,27E-02  | 8,80E-01 | 1,00E+00 | AC156560.1 | 0,98  | No  |
| ENSMUSG00000112971 | -2,38E-01 | -1,448788866 | 2,25E-01  | 6,35E-01 | 8,67E-01 | AC139568.1 | 0,85  | No  |
| ENSMUSG00000112972 | -9,52E-01 | -2,44870125  | 7,93E-01  | 3,73E-01 | 6,74E-01 | AC156632.1 | 0,52  | No  |
| ENSMUSG00000112975 | 3,12E+00  | -2,896177141 | 3,97E+00  | 4,64E-02 | 2,57E-01 | AC153794.1 | 8,68  | No  |
| ENSMUSG00000112976 | 6,85E-02  | 1,120125521  | 1,16E-01  | 7,34E-01 | 9,23E-01 | AC122313.1 | 1,05  | No  |
| ENSMUSG00000112978 | -5,49E-01 | -2,033751094 | 6,58E-01  | 4,17E-01 | 7,12E-01 | CT009518.1 | 0,68  | No  |
| ENSMUSG00000112979 | -1,89E+00 | -3,1076441   | 1,42E+00  | 2,33E-01 | 5,50E-01 | CT485612.1 | 0,27  | No  |
| ENSMUSG00000112980 | 1,25E-01  | 2,850214426  | 1,14E+00  | 2,86E-01 | 5,82E-01 | CT030173.1 | 1,09  | No  |
| ENSMUSG00000112981 | -3,20E+00 | -2,896154564 | 4,32E+00  | 3,77E-02 | 2,31E-01 | AC122811.1 | 0,11  | No  |
| ENSMUSG00000112985 | -3,48E-01 | -2,497575711 | 1,52E-01  | 6,96E-01 | 9,03E-01 | CT033781.1 | 0,79  | No  |
| ENSMUSG00000112989 | -1,95E+00 | -3,033628749 | 1,50E+00  | 2,21E-01 | 5,50E-01 | AC164556.1 | 0,26  | No  |
| ENSMUSG00000112990 | 2,93E-01  | -1,033555157 | 4,07E-01  | 5,24E-01 | 8,01E-01 | AC124516.1 | 1,22  | No  |
| ENSMUSG00000112991 | 3,14E-02  | -3,107617333 | -7,69E-10 | 1,00E+00 | 1,00E+00 | AC152065.1 | 1,02  | No  |
| ENSMUSG00000112992 | -4,94E-01 | -2,655116613 | 2,20E-01  | 6,39E-01 | 8,69E-01 | AC159621.1 | 0,71  | No  |
| ENSMUSG00000112994 | -1,40E+00 | -2,401334893 | 2,71E+00  | 9,97E-02 | 3,92E-01 | CT033799.1 | 0,38  | No  |
| ENSMUSG00000112999 | -1,50E+00 | -1,22608836  | 8,46E+00  | 3,63E-03 | 4,40E-02 | AC159243.1 | 0,35  | Yes |
| ENSMUSG00000113001 | 1,85E+00  | -3,107657832 | 1,35E+00  | 2,46E-01 | 5,50E-01 | AC120383.1 | 3,61  | No  |
| ENSMUSG00000113003 | -2,01E+00 | -2,401383493 | 3,06E+00  | 8,05E-02 | 3,64E-01 | AC125409.1 | 0,25  | No  |
| ENSMUSG00000113007 | -5,46E-02 | -2,548114186 | 3,39E-03  | 9,54E-01 | 1,00E+00 | AC122194.1 | 0,96  | No  |
| ENSMUSG00000113010 | -9,26E-01 | 1,771662018  | 3,23E+01  | 1,30E-08 | 8,80E-07 | AC159261.1 | 0,53  | Yes |

|                    |           |              |          |          |          |            |      |     |
|--------------------|-----------|--------------|----------|----------|----------|------------|------|-----|
| ENSMUSG00000113011 | 3,85E-02  | -0,937793313 | 7,36E-03 | 9,32E-01 | 1,00E+00 | AC211878.2 | 1,03 | No  |
| ENSMUSG00000113012 | -7,44E-02 | -2,770555149 | 3,75E-03 | 9,51E-01 | 1,00E+00 | AC133083.1 | 0,95 | No  |
| ENSMUSG00000113014 | -1,63E-01 | 3,381613269  | 2,52E+00 | 1,12E-01 | 4,12E-01 | AC124426.1 | 0,89 | No  |
| ENSMUSG00000113015 | 4,11E-02  | 1,010774427  | 3,72E-02 | 8,47E-01 | 9,87E-01 | AC154780.1 | 1,03 | No  |
| ENSMUSG00000113016 | -6,25E-01 | -1,711674133 | 9,84E-01 | 3,21E-01 | 6,22E-01 | AL513022.2 | 0,65 | No  |
| ENSMUSG00000113017 | 1,02E+00  | -0,485318972 | 7,30E+00 | 6,88E-03 | 7,09E-02 | AC154816.1 | 2,03 | No  |
| ENSMUSG00000113019 | 2,79E-02  | -2,126760183 | 1,60E-03 | 9,68E-01 | 1,00E+00 | CT009718.2 | 1,02 | No  |
| ENSMUSG00000113020 | -1,46E+00 | -2,355480271 | 2,21E+00 | 1,37E-01 | 4,67E-01 | AC159193.1 | 0,36 | No  |
| ENSMUSG00000113022 | -7,72E-02 | -0,311014754 | 5,12E-02 | 8,21E-01 | 9,72E-01 | CT025623.1 | 0,95 | No  |
| ENSMUSG00000113029 | -6,41E-02 | 3,36704566   | 3,87E-01 | 5,34E-01 | 8,07E-01 | AC122190.1 | 0,96 | No  |
| ENSMUSG00000113030 | 2,69E-01  | 0,006211704  | 8,54E-01 | 3,55E-01 | 6,57E-01 | CT009754.1 | 1,21 | No  |
| ENSMUSG00000113031 | 1,89E+00  | -2,96320077  | 1,38E+00 | 2,40E-01 | 5,50E-01 | AC158365.1 | 3,71 | No  |
| ENSMUSG00000113032 | -1,34E+00 | -2,831974452 | 1,12E+00 | 2,89E-01 | 5,85E-01 | AC158633.3 | 0,39 | No  |
| ENSMUSG00000113035 | 2,35E-01  | 2,091774433  | 2,69E+00 | 1,01E-01 | 3,93E-01 | AC157822.3 | 1,18 | No  |
| ENSMUSG00000113036 | 3,11E-02  | 5,959046808  | 2,23E-01 | 6,37E-01 | 8,68E-01 | AC139941.1 | 1,02 | No  |
| ENSMUSG00000113037 | 1,87E+00  | -3,107639691 | 1,38E+00 | 2,40E-01 | 5,50E-01 | AC147162.1 | 3,67 | No  |
| ENSMUSG00000113039 | 1,81E+00  | -3,10765737  | 1,28E+00 | 2,58E-01 | 5,50E-01 | AC165157.2 | 3,49 | No  |
| ENSMUSG00000113041 | 8,93E-01  | -1,655000424 | 2,02E+00 | 1,55E-01 | 4,98E-01 | CT025556.1 | 1,86 | No  |
| ENSMUSG00000113045 | -1,03E+00 | -2,107629277 | 2,35E+00 | 1,25E-01 | 4,42E-01 | AC154219.1 | 0,49 | No  |
| ENSMUSG00000113047 | 1,42E-01  | 0,601223287  | 4,20E-01 | 5,17E-01 | 7,98E-01 | CT009718.3 | 1,10 | No  |
| ENSMUSG00000113049 | -1,90E+00 | -3,033594154 | 1,44E+00 | 2,30E-01 | 5,50E-01 | CT033774.1 | 0,27 | No  |
| ENSMUSG00000113052 | -3,14E-01 | -1,655153134 | 2,99E-01 | 5,85E-01 | 8,38E-01 | AC159649.1 | 0,80 | No  |
| ENSMUSG00000113054 | 1,12E+00  | -2,600708234 | 1,19E+00 | 2,75E-01 | 5,72E-01 | AC154816.2 | 2,17 | No  |
| ENSMUSG00000113058 | -3,16E+00 | -2,963246013 | 4,20E+00 | 4,04E-02 | 2,38E-01 | AC154517.1 | 0,11 | No  |
| ENSMUSG00000113059 | -1,74E+00 | -2,711678692 | 2,10E+00 | 1,47E-01 | 4,86E-01 | AC156568.1 | 0,30 | No  |
| ENSMUSG00000113061 | -1,01E-01 | 7,713904089  | 2,95E+00 | 8,60E-02 | 3,78E-01 | AL607105.1 | 0,93 | No  |
| ENSMUSG00000113065 | -3,22E+00 | -2,18553278  | 1,14E+01 | 7,43E-04 | 1,27E-02 | AC131743.1 | 0,11 | Yes |
| ENSMUSG00000113067 | -4,82E+00 | -2,226258903 | 1,44E+01 | 1,51E-04 | 3,41E-03 | AC122367.1 | 0,04 | Yes |
| ENSMUSG00000113068 | 2,42E-01  | 1,790094914  | 2,26E+00 | 1,33E-01 | 4,59E-01 | AC122828.1 | 1,18 | No  |
| ENSMUSG00000113070 | 6,10E-02  | 0,236927578  | 4,92E-02 | 8,25E-01 | 9,74E-01 | AC134439.1 | 1,04 | No  |
| ENSMUSG00000113071 | 2,30E-01  | 1,922396596  | 2,10E+00 | 1,48E-01 | 4,87E-01 | AC160130.1 | 1,17 | No  |
| ENSMUSG00000113072 | -2,17E-01 | -1,185559746 | 2,21E-01 | 6,38E-01 | 8,69E-01 | AC159244.1 | 0,86 | No  |

|                    |           |              |           |          |          |            |      |     |
|--------------------|-----------|--------------|-----------|----------|----------|------------|------|-----|
| ENSMUSG00000113076 | -5,93E-02 | -1,740745198 | 7,39E-03  | 9,32E-01 | 1,00E+00 | AC120347.1 | 0,96 | No  |
| ENSMUSG00000113078 | 4,58E-01  | -1,268021478 | 9,87E-01  | 3,20E-01 | 6,21E-01 | CT030185.1 | 1,37 | No  |
| ENSMUSG00000113080 | -4,80E-02 | -2,89615251  | 1,06E-03  | 9,74E-01 | 1,00E+00 | AC161586.1 | 0,97 | No  |
| ENSMUSG00000113083 | -2,74E+00 | -3,033596063 | 2,99E+00  | 8,38E-02 | 3,71E-01 | AC079644.1 | 0,15 | No  |
| ENSMUSG00000113084 | -9,06E-01 | -2,963222258 | 4,56E-01  | 5,00E-01 | 7,85E-01 | AC125444.1 | 0,53 | No  |
| ENSMUSG00000113086 | -3,83E-02 | -3,107651936 | -7,91E-11 | 1,00E+00 | 1,00E+00 | AC139319.1 | 0,97 | No  |
| ENSMUSG00000113087 | -1,07E-01 | -0,662018992 | 7,51E-02  | 7,84E-01 | 9,51E-01 | CT030260.1 | 0,93 | No  |
| ENSMUSG00000113088 | -4,58E-01 | -2,497630172 | 2,15E-01  | 6,43E-01 | 8,72E-01 | AC132623.1 | 0,73 | No  |
| ENSMUSG00000113094 | -3,02E-01 | -0,047088754 | 1,00E+00  | 3,17E-01 | 6,18E-01 | AC159649.2 | 0,81 | No  |
| ENSMUSG00000113096 | -1,92E+00 | -3,0336536   | 1,46E+00  | 2,27E-01 | 5,50E-01 | AC155256.2 | 0,26 | No  |
| ENSMUSG00000113098 | -2,05E+00 | -2,655151684 | 3,20E+00  | 7,36E-02 | 3,45E-01 | AC147256.1 | 0,24 | No  |
| ENSMUSG00000113100 | 1,09E-01  | -1,963241162 | 2,34E-02  | 8,78E-01 | 1,00E+00 | CT009754.2 | 1,08 | No  |
| ENSMUSG00000113101 | 1,85E+00  | -3,107657832 | 1,35E+00  | 2,46E-01 | 5,50E-01 | AC118222.2 | 3,61 | No  |
| ENSMUSG00000113102 | -1,36E+00 | -2,711754666 | 1,16E+00  | 2,82E-01 | 5,78E-01 | AC159193.2 | 0,39 | No  |
| ENSMUSG00000113104 | -1,58E-01 | -0,246856799 | 2,84E-01  | 5,94E-01 | 8,43E-01 | AC138330.1 | 0,90 | No  |
| ENSMUSG00000113106 | -1,87E+00 | -2,86370551  | 1,42E+00  | 2,34E-01 | 5,50E-01 | AC125409.2 | 0,27 | No  |
| ENSMUSG00000113107 | 7,78E-01  | -2,963243536 | 3,33E-01  | 5,64E-01 | 8,26E-01 | CT573034.1 | 1,71 | No  |
| ENSMUSG00000113109 | 1,06E+00  | -1,655265388 | 3,42E+00  | 6,44E-02 | 3,18E-01 | CT025616.1 | 2,09 | No  |
| ENSMUSG00000113110 | -2,68E+00 | -3,033645766 | 2,84E+00  | 9,17E-02 | 3,82E-01 | AC130829.1 | 0,16 | No  |
| ENSMUSG00000113111 | 7,21E-01  | -2,832013301 | 2,84E-01  | 5,94E-01 | 8,43E-01 | AC156558.1 | 1,65 | No  |
| ENSMUSG00000113113 | -2,12E-01 | 5,720502816  | 9,87E+00  | 1,68E-03 | 2,43E-02 | AC159818.1 | 0,86 | Yes |
| ENSMUSG00000113114 | -5,54E-01 | -2,600712727 | 2,41E-01  | 6,24E-01 | 8,58E-01 | AL807824.1 | 0,68 | No  |
| ENSMUSG00000113119 | -3,75E-01 | -2,448663079 | 1,77E-01  | 6,74E-01 | 8,90E-01 | AL645783.1 | 0,77 | No  |
| ENSMUSG00000113123 | 1,17E+00  | -3,14612376  | 6,40E-01  | 4,24E-01 | 7,18E-01 | AC166358.2 | 2,26 | No  |
| ENSMUSG00000113124 | 1,20E+00  | -3,107637352 | 6,66E-01  | 4,15E-01 | 7,10E-01 | AC156576.1 | 2,29 | No  |
| ENSMUSG00000113125 | 1,79E+00  | -3,033666867 | 1,28E+00  | 2,58E-01 | 5,50E-01 | AC140477.2 | 3,46 | No  |
| ENSMUSG00000113126 | -3,07E-01 | -1,800993922 | 2,86E-01  | 5,93E-01 | 8,42E-01 | AC130827.1 | 0,81 | No  |
| ENSMUSG00000113128 | 6,22E-02  | 0,206776464  | 5,57E-02  | 8,13E-01 | 9,68E-01 | AC139323.1 | 1,04 | No  |
| ENSMUSG00000113129 | -1,87E+00 | -3,107637761 | 1,39E+00  | 2,38E-01 | 5,50E-01 | AC211878.5 | 0,27 | No  |
| ENSMUSG00000113130 | -1,94E+00 | -3,107619243 | 1,50E+00  | 2,21E-01 | 5,50E-01 | AC124751.1 | 0,26 | No  |
| ENSMUSG00000113131 | -1,94E+00 | -3,107619243 | 1,50E+00  | 2,21E-01 | 5,50E-01 | AC163651.2 | 0,26 | No  |
| ENSMUSG00000113132 | -1,38E-01 | 1,49636445   | 6,11E-01  | 4,34E-01 | 7,27E-01 | CT030157.1 | 0,91 | No  |

|                    |           |              |           |          |          |            |      |     |
|--------------------|-----------|--------------|-----------|----------|----------|------------|------|-----|
| ENSMUSG00000113136 | 7,41E-01  | -2,185640869 | 9,81E-01  | 3,22E-01 | 6,22E-01 | AC133083.2 | 1,67 | No  |
| ENSMUSG00000113137 | 1,44E-01  | 2,769855072  | 1,40E+00  | 2,37E-01 | 5,50E-01 | AC157515.2 | 1,10 | No  |
| ENSMUSG00000113138 | -1,89E+00 | -3,070168098 | 1,43E+00  | 2,33E-01 | 5,50E-01 | AC133083.3 | 0,27 | No  |
| ENSMUSG00000113140 | 6,80E-01  | -1,497553644 | 1,52E+00  | 2,18E-01 | 5,50E-01 | AC154828.1 | 1,60 | No  |
| ENSMUSG00000113141 | -1,89E+00 | -3,1076441   | 1,42E+00  | 2,33E-01 | 5,50E-01 | AC132954.1 | 0,27 | No  |
| ENSMUSG00000113147 | -9,74E-01 | -2,424824987 | 1,15E+00  | 2,84E-01 | 5,81E-01 | AC160931.1 | 0,51 | No  |
| ENSMUSG00000113149 | -4,69E-02 | 5,550348964  | 4,64E-01  | 4,96E-01 | 7,81E-01 | AC099934.3 | 0,97 | No  |
| ENSMUSG00000113151 | -4,22E-01 | -0,66898559  | 1,36E+00  | 2,44E-01 | 5,50E-01 | CT573034.2 | 0,75 | No  |
| ENSMUSG00000113152 | 8,40E-01  | -1,929393578 | 1,32E+00  | 2,51E-01 | 5,50E-01 | AC155634.1 | 1,79 | No  |
| ENSMUSG00000113157 | -8,25E-01 | -2,088809576 | 9,93E-01  | 3,19E-01 | 6,19E-01 | AC164424.2 | 0,56 | No  |
| ENSMUSG00000113158 | 1,86E+00  | -3,033661846 | 1,35E+00  | 2,46E-01 | 5,50E-01 | AC099934.4 | 3,62 | No  |
| ENSMUSG00000113159 | 6,74E-02  | 0,61606221   | 8,32E-02  | 7,73E-01 | 9,44E-01 | AC126262.1 | 1,05 | No  |
| ENSMUSG00000113161 | 1,06E+00  | -2,355649546 | 1,44E+00  | 2,30E-01 | 5,50E-01 | AC132237.1 | 2,08 | No  |
| ENSMUSG00000113163 | -3,55E+00 | -2,8961404   | 5,65E+00  | 1,74E-02 | 1,38E-01 | AL929054.1 | 0,09 | No  |
| ENSMUSG00000113165 | -4,68E-01 | -0,561009327 | 1,80E+00  | 1,79E-01 | 5,40E-01 | AC115037.1 | 0,72 | No  |
| ENSMUSG00000113168 | -2,63E-02 | -3,033641358 | 2,33E-04  | 9,88E-01 | 1,00E+00 | AC165956.1 | 0,98 | No  |
| ENSMUSG00000113170 | -1,30E+00 | -2,929323548 | 7,49E-01  | 3,87E-01 | 6,87E-01 | AC132344.1 | 0,41 | No  |
| ENSMUSG00000113175 | 5,50E-01  | -1,683051212 | 8,62E-01  | 3,53E-01 | 6,54E-01 | AC117226.2 | 1,46 | No  |
| ENSMUSG00000113177 | -1,92E+00 | -3,033623267 | 1,46E+00  | 2,27E-01 | 5,50E-01 | AC124171.2 | 0,26 | No  |
| ENSMUSG00000113181 | 1,37E+00  | -2,998019414 | 8,65E-01  | 3,52E-01 | 6,53E-01 | AC157571.1 | 2,59 | No  |
| ENSMUSG00000113183 | 4,73E-01  | -2,401410258 | 3,04E-01  | 5,81E-01 | 8,38E-01 | AC153143.1 | 1,39 | No  |
| ENSMUSG00000113184 | 2,80E-01  | 0,934335829  | 1,61E+00  | 2,04E-01 | 5,50E-01 | AC125351.1 | 1,21 | No  |
| ENSMUSG00000113185 | -1,58E+00 | -1,963252633 | 4,63E+00  | 3,13E-02 | 2,05E-01 | AC124687.2 | 0,33 | No  |
| ENSMUSG00000113187 | 9,01E-03  | -3,107646452 | -5,16E-10 | 1,00E+00 | 1,00E+00 | AC079644.4 | 1,01 | No  |
| ENSMUSG00000113188 | 3,32E-02  | 4,764587434  | 1,84E-01  | 6,68E-01 | 8,87E-01 | AC154517.2 | 1,02 | No  |
| ENSMUSG00000113190 | -8,69E-01 | -2,963204587 | 4,16E-01  | 5,19E-01 | 7,98E-01 | AC099934.5 | 0,55 | No  |
| ENSMUSG00000113192 | 1,25E-01  | 2,688194713  | 1,06E+00  | 3,03E-01 | 6,00E-01 | AC138307.1 | 1,09 | No  |
| ENSMUSG00000113195 | -4,82E-01 | -0,654921556 | 1,56E+00  | 2,12E-01 | 5,50E-01 | AC123705.1 | 0,72 | No  |
| ENSMUSG00000113196 | -6,05E-02 | -1,832043588 | 7,69E-03  | 9,30E-01 | 1,00E+00 | AC159193.3 | 0,96 | No  |
| ENSMUSG00000113198 | -2,65E-01 | 6,964479596  | 1,90E+01  | 1,31E-05 | 4,26E-04 | AL591207.1 | 0,83 | Yes |
| ENSMUSG00000113200 | 5,31E-01  | -1,216005994 | 1,16E+00  | 2,81E-01 | 5,78E-01 | AC153152.2 | 1,44 | No  |
| ENSMUSG00000113202 | -8,23E-01 | -2,655108126 | 3,73E-01  | 5,41E-01 | 8,11E-01 | AC155305.1 | 0,57 | No  |

|                    |           |              |           |          |          |            |      |     |
|--------------------|-----------|--------------|-----------|----------|----------|------------|------|-----|
| ENSMUSG00000113203 | -5,85E-01 | -2,71165747  | 2,69E-01  | 6,04E-01 | 8,49E-01 | CT009757.1 | 0,67 | No  |
| ENSMUSG00000113204 | -4,41E-02 | 3,515123444  | 2,08E-01  | 6,49E-01 | 8,75E-01 | CT009718.4 | 0,97 | No  |
| ENSMUSG00000113206 | -4,11E+00 | -2,711639861 | 8,57E+00  | 3,41E-03 | 4,21E-02 | AC126554.2 | 0,06 | Yes |
| ENSMUSG00000113207 | -4,41E-01 | -0,937689197 | 9,04E-01  | 3,42E-01 | 6,42E-01 | AC192616.3 | 0,74 | No  |
| ENSMUSG00000113209 | -7,30E-01 | -1,02458988  | 2,89E+00  | 8,93E-02 | 3,79E-01 | CT030142.1 | 0,60 | No  |
| ENSMUSG00000113210 | 7,52E-01  | -2,896086336 | 3,08E-01  | 5,79E-01 | 8,36E-01 | AC125535.1 | 1,68 | No  |
| ENSMUSG00000113212 | 7,94E-02  | 2,049351956  | 2,73E-01  | 6,01E-01 | 8,47E-01 | CT009718.5 | 1,06 | No  |
| ENSMUSG00000113215 | 6,39E-03  | -1,401452097 | 1,56E-04  | 9,90E-01 | 1,00E+00 | AC133866.1 | 1,00 | No  |
| ENSMUSG00000113216 | 6,16E-01  | -1,801034215 | 9,91E-01  | 3,19E-01 | 6,20E-01 | AL590503.1 | 1,53 | No  |
| ENSMUSG00000113219 | 2,91E-01  | 0,925219825  | 1,74E+00  | 1,87E-01 | 5,50E-01 | CT030714.1 | 1,22 | No  |
| ENSMUSG00000113222 | -1,11E+00 | -1,145867506 | 4,92E+00  | 2,66E-02 | 1,83E-01 | AC159622.1 | 0,46 | No  |
| ENSMUSG00000113224 | -2,08E-01 | -0,863589937 | 2,22E-01  | 6,37E-01 | 8,68E-01 | AC154742.1 | 0,87 | No  |
| ENSMUSG00000113226 | -2,46E-01 | -1,832003814 | 1,20E-01  | 7,29E-01 | 9,20E-01 | CT009765.1 | 0,84 | No  |
| ENSMUSG00000113232 | 1,87E+00  | -3,107639691 | 1,38E+00  | 2,40E-01 | 5,50E-01 | AC156560.2 | 3,67 | No  |
| ENSMUSG00000113235 | 9,01E-03  | -3,107646452 | -5,16E-10 | 1,00E+00 | 1,00E+00 | AC159293.1 | 1,01 | No  |
| ENSMUSG00000113237 | 4,93E-02  | -0,146480077 | 2,74E-02  | 8,69E-01 | 1,00E+00 | AC154231.1 | 1,03 | No  |
| ENSMUSG00000113238 | 2,77E-02  | -0,195464384 | 8,04E-03  | 9,29E-01 | 1,00E+00 | AC154552.2 | 1,02 | No  |
| ENSMUSG00000113239 | 1,60E+00  | -2,65509486  | 1,76E+00  | 1,85E-01 | 5,49E-01 | AC160391.1 | 3,04 | No  |
| ENSMUSG00000113240 | -6,08E-01 | -0,528844707 | 3,15E+00  | 7,57E-02 | 3,50E-01 | AC126799.1 | 0,66 | No  |
| ENSMUSG00000113242 | -2,69E-01 | 1,604533987  | 2,59E+00  | 1,08E-01 | 4,02E-01 | AC166358.3 | 0,83 | No  |
| ENSMUSG00000113244 | 1,87E+00  | -3,107639691 | 1,38E+00  | 2,40E-01 | 5,50E-01 | CT025616.2 | 3,67 | No  |
| ENSMUSG00000113245 | 4,48E-01  | -0,395545516 | 1,64E+00  | 2,01E-01 | 5,50E-01 | AC124732.1 | 1,36 | No  |
| ENSMUSG00000113246 | -8,81E-02 | -2,832022279 | 5,36E-03  | 9,42E-01 | 1,00E+00 | AC155232.1 | 0,94 | No  |
| ENSMUSG00000113247 | -7,38E-02 | -3,033659033 | 2,66E-03  | 9,59E-01 | 1,00E+00 | AC154231.2 | 0,95 | No  |
| ENSMUSG00000113249 | -1,34E+00 | -2,600625611 | 1,12E+00  | 2,89E-01 | 5,85E-01 | AC115037.2 | 0,40 | No  |
| ENSMUSG00000113250 | -4,86E-01 | -1,015708403 | 1,15E+00  | 2,84E-01 | 5,81E-01 | AC123705.2 | 0,71 | No  |
| ENSMUSG00000113255 | -7,88E-02 | 4,323291849  | 8,85E-01  | 3,47E-01 | 6,48E-01 | AC123954.1 | 0,95 | No  |
| ENSMUSG00000113257 | 1,87E+00  | -3,107639691 | 1,38E+00  | 2,40E-01 | 5,50E-01 | CT009757.2 | 3,67 | No  |
| ENSMUSG00000113258 | 5,23E-03  | 5,24878269   | 5,37E-03  | 9,42E-01 | 1,00E+00 | CT009546.1 | 1,00 | No  |
| ENSMUSG00000113259 | -1,89E+00 | -3,033648118 | 1,42E+00  | 2,33E-01 | 5,50E-01 | AC132239.1 | 0,27 | No  |
| ENSMUSG00000113261 | 2,31E-01  | -2,311139998 | 6,69E-02  | 7,96E-01 | 9,57E-01 | AC153132.1 | 1,17 | No  |
| ENSMUSG00000113262 | 1,78E-03  | 3,886796397  | 3,75E-04  | 9,85E-01 | 1,00E+00 | Dohh       | 1,00 | No  |



|                    |           |              |           |          |          |            |      |    |
|--------------------|-----------|--------------|-----------|----------|----------|------------|------|----|
| ENSMUSG00000113263 | -8,92E-02 | 3,952130447  | 1,01E+00  | 3,15E-01 | 6,16E-01 | AC159190.1 | 0,94 | No |
| ENSMUSG00000113265 | 1,36E+00  | -2,355617809 | 1,89E+00  | 1,69E-01 | 5,24E-01 | AC122302.1 | 2,57 | No |
| ENSMUSG00000113266 | -1,09E-01 | -0,52280294  | 8,75E-02  | 7,67E-01 | 9,40E-01 | CR974485.4 | 0,93 | No |
| ENSMUSG00000113268 | -6,29E-01 | -0,378085539 | 3,34E+00  | 6,77E-02 | 3,28E-01 | AC159243.2 | 0,65 | No |
| ENSMUSG00000113271 | -1,11E+00 | -2,929273725 | 7,17E-01  | 3,97E-01 | 6,97E-01 | AC124744.1 | 0,46 | No |
| ENSMUSG00000113274 | -6,75E-02 | -1,683097329 | 1,06E-02  | 9,18E-01 | 1,00E+00 | CT010471.1 | 0,95 | No |
| ENSMUSG00000113275 | -4,51E-01 | 1,225734489  | 5,94E+00  | 1,48E-02 | 1,25E-01 | AC155241.2 | 0,73 | No |
| ENSMUSG00000113280 | 1,22E-01  | 0,649815809  | 2,74E-01  | 6,01E-01 | 8,47E-01 | AC211878.6 | 1,09 | No |
| ENSMUSG00000113285 | 3,20E-01  | -0,175896966 | 9,39E-01  | 3,33E-01 | 6,33E-01 | AC102569.1 | 1,25 | No |
| ENSMUSG00000113290 | -4,64E-02 | -2,711691351 | 1,48E-03  | 9,69E-01 | 1,00E+00 | AC173210.1 | 0,97 | No |
| ENSMUSG00000113292 | 1,30E+00  | -1,268216412 | 7,44E+00  | 6,38E-03 | 6,72E-02 | CT030167.1 | 2,46 | No |
| ENSMUSG00000113294 | 5,09E-01  | 0,15989575   | 3,26E+00  | 7,09E-02 | 3,37E-01 | AC154636.1 | 1,42 | No |
| ENSMUSG00000113295 | 1,87E+00  | -3,033632735 | 1,36E+00  | 2,43E-01 | 5,50E-01 | CT030657.1 | 3,66 | No |
| ENSMUSG00000113298 | 2,83E-02  | 0,508466225  | 1,35E-02  | 9,08E-01 | 1,00E+00 | AC159632.1 | 1,02 | No |
| ENSMUSG00000113299 | -3,17E+00 | -2,963252348 | 4,23E+00  | 3,96E-02 | 2,36E-01 | AC122371.2 | 0,11 | No |
| ENSMUSG00000113300 | -3,03E-01 | -2,146152092 | 1,59E-01  | 6,90E-01 | 8,99E-01 | AC127242.1 | 0,81 | No |
| ENSMUSG00000113303 | -4,63E-02 | -2,655067462 | 1,93E-03  | 9,65E-01 | 1,00E+00 | AC124595.1 | 0,97 | No |
| ENSMUSG00000113305 | -6,99E-02 | -2,49758614  | 6,76E-03  | 9,34E-01 | 1,00E+00 | AC138401.2 | 0,95 | No |
| ENSMUSG00000113308 | 3,61E-01  | 2,528116125  | 7,48E+00  | 6,24E-03 | 6,61E-02 | CT030166.3 | 1,28 | No |
| ENSMUSG00000113309 | -3,16E-02 | -2,711718857 | 8,48E-04  | 9,77E-01 | 1,00E+00 | AC173210.2 | 0,98 | No |
| ENSMUSG00000113310 | 1,81E+00  | -3,10765737  | 1,28E+00  | 2,58E-01 | 5,50E-01 | CT009546.2 | 3,49 | No |
| ENSMUSG00000113311 | 4,82E-02  | 9,295824539  | 7,23E-01  | 3,95E-01 | 6,96E-01 | CT009486.1 | 1,03 | No |
| ENSMUSG00000113313 | 1,43E-01  | -2,401290648 | 2,20E-02  | 8,82E-01 | 1,00E+00 | AC132085.1 | 1,10 | No |
| ENSMUSG00000113315 | 3,10E+00  | -2,963298937 | 3,91E+00  | 4,81E-02 | 2,64E-01 | CT009486.2 | 8,56 | No |
| ENSMUSG00000113318 | -7,26E-02 | -1,18556952  | 1,85E-02  | 8,92E-01 | 1,00E+00 | AC157822.4 | 0,95 | No |
| ENSMUSG00000113321 | 1,85E+00  | -3,107657832 | 1,35E+00  | 2,46E-01 | 5,50E-01 | AC149586.1 | 3,61 | No |
| ENSMUSG00000113322 | 6,30E-01  | -1,683274133 | 1,17E+00  | 2,80E-01 | 5,77E-01 | AC121504.1 | 1,55 | No |
| ENSMUSG00000113325 | 2,74E-02  | -3,033621357 | 9,16E-12  | 1,00E+00 | 1,00E+00 | CT010449.1 | 1,02 | No |
| ENSMUSG00000113326 | -8,83E-01 | -1,574071642 | 2,37E+00  | 1,23E-01 | 4,39E-01 | CT009757.3 | 0,54 | No |
| ENSMUSG00000113328 | 7,57E-02  | 3,197300001  | 5,05E-01  | 4,77E-01 | 7,65E-01 | AC154347.1 | 1,05 | No |
| ENSMUSG00000113331 | 3,14E-02  | -3,107617333 | -7,69E-10 | 1,00E+00 | 1,00E+00 | AC091458.3 | 1,02 | No |
| ENSMUSG00000113334 | 6,94E-01  | -0,350047806 | 4,12E+00  | 4,23E-02 | 2,45E-01 | AC113508.1 | 1,62 | No |

|                    |           |              |           |          |          |            |      |    |
|--------------------|-----------|--------------|-----------|----------|----------|------------|------|----|
| ENSMUSG00000113335 | -1,40E+00 | -2,1855883   | 2,70E+00  | 1,01E-01 | 3,92E-01 | AC166349.1 | 0,38 | No |
| ENSMUSG00000113338 | -8,59E-02 | -1,311095092 | 2,97E-02  | 8,63E-01 | 9,97E-01 | AC173210.3 | 0,94 | No |
| ENSMUSG00000113340 | -1,89E+00 | -3,1076441   | 1,42E+00  | 2,33E-01 | 5,50E-01 | AC154248.1 | 0,27 | No |
| ENSMUSG00000113341 | -6,16E-01 | -2,107675265 | 7,37E-01  | 3,91E-01 | 6,91E-01 | AC159193.4 | 0,65 | No |
| ENSMUSG00000113348 | -4,13E-02 | -3,033659495 | 7,08E-04  | 9,79E-01 | 1,00E+00 | AC079644.5 | 0,97 | No |
| ENSMUSG00000113349 | -5,62E-01 | -1,896152195 | 6,90E-01  | 4,06E-01 | 7,02E-01 | AC132336.1 | 0,68 | No |
| ENSMUSG00000113355 | -1,06E+00 | -2,126723339 | 1,98E+00  | 1,59E-01 | 5,06E-01 | AC133934.1 | 0,48 | No |
| ENSMUSG00000113357 | 3,16E+00  | -2,655111588 | 4,07E+00  | 4,38E-02 | 2,49E-01 | AC152065.2 | 8,93 | No |
| ENSMUSG00000113359 | -4,13E-02 | -3,033659495 | 7,08E-04  | 9,79E-01 | 1,00E+00 | AC159263.1 | 0,97 | No |
| ENSMUSG00000113361 | -2,57E-01 | -1,424828959 | 2,47E-01  | 6,19E-01 | 8,56E-01 | AC152827.1 | 0,84 | No |
| ENSMUSG00000113362 | 1,87E+00  | -3,107639691 | 1,38E+00  | 2,40E-01 | 5,50E-01 | AC159633.1 | 3,67 | No |
| ENSMUSG00000113363 | 4,24E-01  | -2,832009585 | 1,39E-01  | 7,09E-01 | 9,09E-01 | AC127270.1 | 1,34 | No |
| ENSMUSG00000113368 | -6,64E-01 | 0,176228683  | 5,70E+00  | 1,69E-02 | 1,36E-01 | AC159815.1 | 0,63 | No |
| ENSMUSG00000113370 | -2,75E+00 | -2,963216826 | 2,99E+00  | 8,38E-02 | 3,71E-01 | AC123620.1 | 0,15 | No |
| ENSMUSG00000113379 | -1,54E+00 | -1,998085043 | 3,44E+00  | 6,37E-02 | 3,16E-01 | AC122828.2 | 0,34 | No |
| ENSMUSG00000113380 | -1,59E+00 | -2,655084966 | 2,19E+00  | 1,39E-01 | 4,70E-01 | AC122465.1 | 0,33 | No |
| ENSMUSG00000113385 | 5,95E-02  | -1,801002401 | 1,03E-02  | 9,19E-01 | 1,00E+00 | AC101875.1 | 1,04 | No |
| ENSMUSG00000113386 | 4,62E-01  | -1,574199469 | 7,10E-01  | 3,99E-01 | 6,98E-01 | AC154903.1 | 1,38 | No |
| ENSMUSG00000113387 | 1,23E+00  | -2,655137077 | 9,38E-01  | 3,33E-01 | 6,33E-01 | AC162181.1 | 2,35 | No |
| ENSMUSG00000113388 | -3,59E-02 | -2,600703582 | 1,41E-03  | 9,70E-01 | 1,00E+00 | AC192616.5 | 0,98 | No |
| ENSMUSG00000113389 | -1,09E-01 | 5,304126345  | 2,38E+00  | 1,23E-01 | 4,37E-01 | AC126799.2 | 0,93 | No |
| ENSMUSG00000113390 | -9,59E-01 | -2,600627845 | 8,07E-01  | 3,69E-01 | 6,70E-01 | AC163040.1 | 0,51 | No |
| ENSMUSG00000113392 | -1,90E+00 | -2,963239763 | 1,44E+00  | 2,31E-01 | 5,50E-01 | AC155256.3 | 0,27 | No |
| ENSMUSG00000113394 | -1,94E+00 | -3,107619243 | 1,50E+00  | 2,21E-01 | 5,50E-01 | CT033781.3 | 0,26 | No |
| ENSMUSG00000113395 | 9,01E-03  | -3,107646452 | -5,16E-10 | 1,00E+00 | 1,00E+00 | AC160130.2 | 1,01 | No |
| ENSMUSG00000113396 | -1,89E+00 | -3,1076441   | 1,42E+00  | 2,33E-01 | 5,50E-01 | AC139568.2 | 0,27 | No |
| ENSMUSG00000113403 | 8,48E-02  | -1,770653868 | 1,75E-02  | 8,95E-01 | 1,00E+00 | AC153663.1 | 1,06 | No |
| ENSMUSG00000113405 | 1,39E-02  | -2,051744974 | 4,18E-04  | 9,84E-01 | 1,00E+00 | AC156576.2 | 1,01 | No |
| ENSMUSG00000113408 | 1,81E+00  | -3,10765737  | 1,28E+00  | 2,58E-01 | 5,50E-01 | AC124739.2 | 3,49 | No |
| ENSMUSG00000113409 | -2,00E-02 | -2,896140696 | 2,28E-04  | 9,88E-01 | 1,00E+00 | CT025556.2 | 0,99 | No |
| ENSMUSG00000113412 | -9,34E-02 | 4,896318815  | 1,54E+00  | 2,14E-01 | 5,50E-01 | AC102228.1 | 0,94 | No |
| ENSMUSG00000113416 | -8,32E-01 | -2,896143825 | 3,80E-01  | 5,38E-01 | 8,09E-01 | CT030170.3 | 0,56 | No |

|                    |           |              |           |          |          |            |      |     |
|--------------------|-----------|--------------|-----------|----------|----------|------------|------|-----|
| ENSMUSG00000113419 | 1,19E-01  | -0,175635115 | 1,30E-01  | 7,19E-01 | 9,15E-01 | AC079644.9 | 1,09 | No  |
| ENSMUSG00000113423 | 2,74E-02  | -3,033621357 | 9,16E-12  | 1,00E+00 | 1,00E+00 | AC132954.2 | 1,02 | No  |
| ENSMUSG00000113424 | -2,35E-01 | 0,592961752  | 1,01E+00  | 3,16E-01 | 6,16E-01 | AL607131.1 | 0,85 | No  |
| ENSMUSG00000113425 | 3,48E-01  | 1,87027003   | 4,76E+00  | 2,91E-02 | 1,94E-01 | AC159813.1 | 1,27 | No  |
| ENSMUSG00000113427 | 7,43E-01  | 1,298166197  | 1,63E+01  | 5,29E-05 | 1,42E-03 | AC163040.2 | 1,67 | Yes |
| ENSMUSG00000113428 | 1,44E-01  | 2,283681049  | 1,10E+00  | 2,95E-01 | 5,90E-01 | AC122357.1 | 1,11 | No  |
| ENSMUSG00000113430 | -1,98E-02 | -3,033655952 | 2,83E-11  | 1,00E+00 | 1,00E+00 | AC129019.1 | 0,99 | No  |
| ENSMUSG00000113431 | -4,93E-01 | -1,185572983 | 1,15E+00  | 2,83E-01 | 5,80E-01 | AC055772.1 | 0,71 | No  |
| ENSMUSG00000113432 | -1,89E-01 | -0,929417908 | 2,08E-01  | 6,48E-01 | 8,75E-01 | AC154828.2 | 0,88 | No  |
| ENSMUSG00000113434 | -3,11E-01 | -1,912562028 | 2,19E-01  | 6,40E-01 | 8,70E-01 | CT485612.4 | 0,81 | No  |
| ENSMUSG00000113440 | 1,12E-02  | -1,548351194 | 5,15E-04  | 9,82E-01 | 1,00E+00 | AL714025.1 | 1,01 | No  |
| ENSMUSG00000113441 | -2,74E+00 | -3,033596063 | 2,99E+00  | 8,38E-02 | 3,71E-01 | CT010460.1 | 0,15 | No  |
| ENSMUSG00000113442 | -2,74E+00 | -3,033596063 | 2,99E+00  | 8,38E-02 | 3,71E-01 | AC159885.3 | 0,15 | No  |
| ENSMUSG00000113448 | 2,12E-01  | -0,509966179 | 3,23E-01  | 5,70E-01 | 8,30E-01 | CT030166.4 | 1,16 | No  |
| ENSMUSG00000113449 | 1,09E+00  | -2,35559696  | 1,52E+00  | 2,18E-01 | 5,50E-01 | AL589737.1 | 2,12 | No  |
| ENSMUSG00000113450 | -6,59E-02 | 3,261290749  | 4,13E-01  | 5,20E-01 | 7,99E-01 | Zfp935     | 0,96 | No  |
| ENSMUSG00000113451 | -3,83E-02 | -3,107651936 | -7,91E-11 | 1,00E+00 | 1,00E+00 | AC153662.1 | 0,97 | No  |
| ENSMUSG00000113454 | -2,63E-02 | -3,033641358 | 2,33E-04  | 9,88E-01 | 1,00E+00 | AC167364.1 | 0,98 | No  |
| ENSMUSG00000113455 | 3,14E-02  | -3,107617333 | -7,69E-10 | 1,00E+00 | 1,00E+00 | AC131743.2 | 1,02 | No  |
| ENSMUSG00000113456 | -4,57E-01 | -0,355466393 | 1,71E+00  | 1,91E-01 | 5,50E-01 | CT030140.2 | 0,73 | No  |
| ENSMUSG00000113462 | 9,01E-03  | -3,107646452 | -5,16E-10 | 1,00E+00 | 1,00E+00 | AC163357.1 | 1,01 | No  |
| ENSMUSG00000113466 | -8,38E-01 | -2,146080884 | 1,14E+00  | 2,85E-01 | 5,82E-01 | AC124732.2 | 0,56 | No  |
| ENSMUSG00000113467 | -3,85E+00 | -2,770578869 | 7,09E+00  | 7,76E-03 | 7,72E-02 | AC138767.1 | 0,07 | No  |
| ENSMUSG00000113469 | -8,45E-01 | -2,963265612 | 3,92E-01  | 5,31E-01 | 8,05E-01 | AC156576.3 | 0,56 | No  |
| ENSMUSG00000113471 | 2,15E-01  | -1,428864787 | 1,97E-01  | 6,57E-01 | 8,80E-01 | CT030657.2 | 1,16 | No  |
| ENSMUSG00000113472 | 2,79E-01  | -0,73386057  | 4,01E-01  | 5,26E-01 | 8,03E-01 | CT009757.4 | 1,21 | No  |
| ENSMUSG00000113473 | 2,20E-01  | 0,019336726  | 5,43E-01  | 4,61E-01 | 7,50E-01 | CT030185.2 | 1,16 | No  |
| ENSMUSG00000113474 | 1,81E+00  | -3,10765737  | 1,28E+00  | 2,58E-01 | 5,50E-01 | AC126554.5 | 3,49 | No  |
| ENSMUSG00000113475 | 5,84E-01  | -3,033648014 | 1,35E-01  | 7,13E-01 | 9,11E-01 | AC133183.1 | 1,50 | No  |
| ENSMUSG00000113476 | 2,59E+00  | -2,89617125  | 2,61E+00  | 1,06E-01 | 3,99E-01 | AC154517.3 | 6,04 | No  |
| ENSMUSG00000113486 | 2,57E-01  | -0,832132048 | 3,46E-01  | 5,57E-01 | 8,21E-01 | AC122484.1 | 1,20 | No  |
| ENSMUSG00000113488 | -1,11E+00 | -2,627631692 | 1,14E+00  | 2,86E-01 | 5,82E-01 | AC159244.2 | 0,46 | No  |

|                    |           |              |          |          |          |            |      |    |
|--------------------|-----------|--------------|----------|----------|----------|------------|------|----|
| ENSMUSG00000113489 | -2,71E+00 | -3,033620915 | 2,92E+00 | 8,75E-02 | 3,78E-01 | Gm16381    | 0,15 | No |
| ENSMUSG00000113491 | 5,80E-02  | 4,71240178   | 5,58E-01 | 4,55E-01 | 7,45E-01 | AC166827.1 | 1,04 | No |
| ENSMUSG00000113492 | 7,77E-01  | -1,627776904 | 1,68E+00 | 1,95E-01 | 5,50E-01 | AC159261.2 | 1,71 | No |
| ENSMUSG00000113494 | -3,48E-01 | -0,195737326 | 1,17E+00 | 2,79E-01 | 5,76E-01 | AC148334.1 | 0,79 | No |
| ENSMUSG00000113495 | -8,81E-02 | -2,832022279 | 5,36E-03 | 9,42E-01 | 1,00E+00 | CT573034.3 | 0,94 | No |
| ENSMUSG00000113497 | -2,50E-01 | -0,015825311 | 7,79E-01 | 3,78E-01 | 6,78E-01 | AC141560.1 | 0,84 | No |
| ENSMUSG00000113504 | -2,40E-03 | 3,371335463  | 5,58E-04 | 9,81E-01 | 1,00E+00 | AC124426.2 | 1,00 | No |
| ENSMUSG00000113506 | -6,96E-01 | -2,929240761 | 1,95E-01 | 6,59E-01 | 8,81E-01 | AC166358.6 | 0,62 | No |
| ENSMUSG00000113508 | -7,38E-02 | 1,551267294  | 1,87E-01 | 6,66E-01 | 8,85E-01 | AC127590.1 | 0,95 | No |
| ENSMUSG00000113510 | -7,67E-01 | -2,070155375 | 1,20E+00 | 2,74E-01 | 5,70E-01 | AC159315.3 | 0,59 | No |
| ENSMUSG00000113511 | 8,16E-02  | -1,929287691 | 1,63E-02 | 8,99E-01 | 1,00E+00 | AC132336.2 | 1,06 | No |
| ENSMUSG00000113512 | -1,40E-01 | 2,29790198   | 1,03E+00 | 3,11E-01 | 6,11E-01 | AL591207.2 | 0,91 | No |
| ENSMUSG00000113514 | -1,92E+00 | -3,0336536   | 1,46E+00 | 2,27E-01 | 5,50E-01 | AC154231.3 | 0,26 | No |
| ENSMUSG00000113515 | 6,58E-01  | -1,655122404 | 1,27E+00 | 2,59E-01 | 5,52E-01 | AL645745.1 | 1,58 | No |
| ENSMUSG00000113516 | -1,89E+00 | -3,1076441   | 1,42E+00 | 2,33E-01 | 5,50E-01 | AC167364.2 | 0,27 | No |
| ENSMUSG00000113519 | -2,02E+00 | -2,497564831 | 3,09E+00 | 7,90E-02 | 3,59E-01 | AC073562.1 | 0,25 | No |
| ENSMUSG00000113520 | -8,24E-01 | -2,770570293 | 3,73E-01 | 5,41E-01 | 8,11E-01 | CT009742.1 | 0,56 | No |
| ENSMUSG00000113521 | 9,04E-03  | 2,640581567  | 5,20E-03 | 9,43E-01 | 1,00E+00 | AC160122.1 | 1,01 | No |
| ENSMUSG00000113525 | 5,50E-03  | 4,470550469  | 4,61E-03 | 9,46E-01 | 1,00E+00 | AC154550.1 | 1,00 | No |
| ENSMUSG00000113527 | 9,01E-01  | -2,10761401  | 1,52E+00 | 2,18E-01 | 5,50E-01 | AC104832.1 | 1,87 | No |
| ENSMUSG00000113528 | -1,19E+00 | -2,311084271 | 1,85E+00 | 1,74E-01 | 5,32E-01 | CT009754.4 | 0,44 | No |
| ENSMUSG00000113529 | 3,04E-02  | 3,476547797  | 9,30E-02 | 7,60E-01 | 9,37E-01 | AC159649.3 | 1,02 | No |
| ENSMUSG00000113531 | 1,86E+00  | -3,033661846 | 1,35E+00 | 2,46E-01 | 5,50E-01 | AC125344.1 | 3,62 | No |
| ENSMUSG00000113533 | -1,89E+00 | -3,1076441   | 1,42E+00 | 2,33E-01 | 5,50E-01 | CT954323.4 | 0,27 | No |
| ENSMUSG00000113534 | -1,92E+00 | -3,033623267 | 1,46E+00 | 2,27E-01 | 5,50E-01 | AC134826.1 | 0,26 | No |
| ENSMUSG00000113535 | -1,89E+00 | -3,1076441   | 1,42E+00 | 2,33E-01 | 5,50E-01 | AC068459.2 | 0,27 | No |
| ENSMUSG00000113536 | -1,74E-01 | 1,655882757  | 1,07E+00 | 3,02E-01 | 5,98E-01 | CT030170.4 | 0,89 | No |
| ENSMUSG00000113539 | -1,94E+00 | -3,107619243 | 1,50E+00 | 2,21E-01 | 5,50E-01 | AC120383.2 | 0,26 | No |
| ENSMUSG00000113540 | -1,72E+00 | -2,740802718 | 2,07E+00 | 1,50E-01 | 4,92E-01 | AC160931.3 | 0,30 | No |
| ENSMUSG00000113541 | 1,79E+00  | -3,033666867 | 1,28E+00 | 2,58E-01 | 5,50E-01 | AC238676.2 | 3,46 | No |
| ENSMUSG00000113542 | -1,03E+00 | -1,832126415 | 2,37E+00 | 1,24E-01 | 4,40E-01 | AC122886.1 | 0,49 | No |
| ENSMUSG00000113543 | -1,87E+00 | -3,107637761 | 1,39E+00 | 2,38E-01 | 5,50E-01 | AC125484.1 | 0,27 | No |

|                    |           |              |          |          |          |            |      |    |
|--------------------|-----------|--------------|----------|----------|----------|------------|------|----|
| ENSMUSG00000113544 | 1,81E+00  | -3,10765737  | 1,28E+00 | 2,58E-01 | 5,50E-01 | CT010462.1 | 3,49 | No |
| ENSMUSG00000113545 | -2,66E+00 | -3,033639428 | 2,81E+00 | 9,35E-02 | 3,83E-01 | AC173481.1 | 0,16 | No |
| ENSMUSG00000113546 | 1,11E-01  | 2,685514549  | 8,09E-01 | 3,68E-01 | 6,70E-01 | AC141900.1 | 1,08 | No |
| ENSMUSG00000113548 | -6,54E-01 | -1,997932398 | 7,79E-01 | 3,78E-01 | 6,78E-01 | AC114412.1 | 0,64 | No |
| ENSMUSG00000113549 | 3,14E+00  | -2,655129235 | 4,03E+00 | 4,47E-02 | 2,52E-01 | CT030643.1 | 8,84 | No |
| ENSMUSG00000113553 | 8,56E-02  | -1,863672031 | 1,62E-02 | 8,99E-01 | 1,00E+00 | AC159210.1 | 1,06 | No |
| ENSMUSG00000113554 | 2,74E-02  | -3,033621357 | 9,16E-12 | 1,00E+00 | 1,00E+00 | AC165149.1 | 1,02 | No |
| ENSMUSG00000113555 | -1,11E-01 | 4,24750037   | 1,74E+00 | 1,87E-01 | 5,50E-01 | AC110377.1 | 0,93 | No |
| ENSMUSG00000113557 | -1,67E+00 | -2,226229438 | 4,22E+00 | 4,00E-02 | 2,37E-01 | AC153143.2 | 0,31 | No |
| ENSMUSG00000113563 | 1,81E+00  | -3,10765737  | 1,28E+00 | 2,58E-01 | 5,50E-01 | CT025604.1 | 3,49 | No |
| ENSMUSG00000113564 | -1,89E+00 | -3,1076441   | 1,42E+00 | 2,33E-01 | 5,50E-01 | CT030687.1 | 0,27 | No |
| ENSMUSG00000113565 | -8,67E-02 | -0,733470785 | 4,52E-02 | 8,32E-01 | 9,78E-01 | AC116589.7 | 0,94 | No |
| ENSMUSG00000113566 | 7,63E-01  | -2,896141096 | 3,18E-01 | 5,73E-01 | 8,32E-01 | AC124426.3 | 1,70 | No |
| ENSMUSG00000113568 | 1,07E+00  | -2,355620438 | 1,46E+00 | 2,26E-01 | 5,50E-01 | AC159237.1 | 2,10 | No |
| ENSMUSG00000113569 | -5,24E-02 | -2,711714857 | 1,87E-03 | 9,65E-01 | 1,00E+00 | AC134917.2 | 0,96 | No |
| ENSMUSG00000113570 | 2,61E-01  | -2,107659543 | 1,41E-01 | 7,07E-01 | 9,08E-01 | AC124739.3 | 1,20 | No |
| ENSMUSG00000113571 | 8,35E-01  | -0,535495469 | 5,70E+00 | 1,69E-02 | 1,36E-01 | AC122314.1 | 1,78 | No |
| ENSMUSG00000113572 | -3,56E+00 | -2,896109226 | 5,70E+00 | 1,70E-02 | 1,36E-01 | AC110521.2 | 0,08 | No |
| ENSMUSG00000113575 | -2,65E+00 | -2,963225595 | 2,80E+00 | 9,41E-02 | 3,84E-01 | AC163286.1 | 0,16 | No |
| ENSMUSG00000113577 | 4,46E-02  | -0,311240037 | 1,73E-02 | 8,95E-01 | 1,00E+00 | AC160931.4 | 1,03 | No |
| ENSMUSG00000113580 | 2,67E+00  | -3,033636951 | 2,76E+00 | 9,68E-02 | 3,88E-01 | AC159635.1 | 6,36 | No |
| ENSMUSG00000113582 | 1,90E+00  | -2,600740945 | 2,70E+00 | 1,01E-01 | 3,92E-01 | AC159813.2 | 3,74 | No |
| ENSMUSG00000113584 | 1,82E+00  | -3,033667329 | 1,31E+00 | 2,52E-01 | 5,50E-01 | AC132325.1 | 3,54 | No |
| ENSMUSG00000113585 | 3,43E-02  | 1,440369922  | 3,69E-02 | 8,48E-01 | 9,88E-01 | AL591582.1 | 1,02 | No |
| ENSMUSG00000113587 | -3,39E-01 | -1,49757146  | 4,69E-01 | 4,94E-01 | 7,79E-01 | CT010478.2 | 0,79 | No |
| ENSMUSG00000113589 | -2,73E-01 | 0,362150721  | 1,10E+00 | 2,94E-01 | 5,89E-01 | AC124732.3 | 0,83 | No |
| ENSMUSG00000113591 | 5,34E-01  | -2,088826912 | 5,18E-01 | 4,71E-01 | 7,60E-01 | AC161117.1 | 1,45 | No |
| ENSMUSG00000113596 | 1,25E+00  | -2,83203723  | 9,70E-01 | 3,25E-01 | 6,25E-01 | AC158536.1 | 2,38 | No |
| ENSMUSG00000113600 | -5,90E-02 | 4,684703561  | 5,69E-01 | 4,51E-01 | 7,41E-01 | AC099934.6 | 0,96 | No |
| ENSMUSG00000113601 | -2,52E-01 | -0,107410141 | 7,04E-01 | 4,02E-01 | 7,00E-01 | CT030185.3 | 0,84 | No |
| ENSMUSG00000113603 | 1,10E+00  | -2,355635038 | 1,16E+00 | 2,82E-01 | 5,78E-01 | CT030159.1 | 2,15 | No |
| ENSMUSG00000113604 | -9,10E-01 | -2,77061699  | 7,21E-01 | 3,96E-01 | 6,96E-01 | CT030146.1 | 0,53 | No |

|                    |           |              |           |          |          |            |  |       |     |
|--------------------|-----------|--------------|-----------|----------|----------|------------|--|-------|-----|
| ENSMUSG00000113606 | 1,25E-01  | 3,409102881  | 1,45E+00  | 2,28E-01 | 5,50E-01 | AC125543.4 |  | 1,09  | No  |
| ENSMUSG00000113608 | -1,89E+00 | -3,1076441   | 1,42E+00  | 2,33E-01 | 5,50E-01 | AC157494.1 |  | 0,27  | No  |
| ENSMUSG00000113610 | 1,88E+00  | -2,963229875 | 1,37E+00  | 2,42E-01 | 5,50E-01 | AC125409.3 |  | 3,68  | No  |
| ENSMUSG00000113611 | -2,46E-01 | -0,042717393 | 7,23E-01  | 3,95E-01 | 6,96E-01 | AC162801.3 |  | 0,84  | No  |
| ENSMUSG00000113612 | 1,57E+00  | -2,832047758 | 1,69E+00  | 1,93E-01 | 5,50E-01 | AC154636.2 |  | 2,98  | No  |
| ENSMUSG00000113614 | -3,83E-02 | -3,107651936 | -7,91E-11 | 1,00E+00 | 1,00E+00 | AC126554.6 |  | 0,97  | No  |
| ENSMUSG00000113617 | 1,05E-01  | 2,18692447   | 5,60E-01  | 4,54E-01 | 7,44E-01 | CT485612.7 |  | 1,08  | No  |
| ENSMUSG00000113619 | 7,67E-02  | -2,268115056 | 7,76E-03  | 9,30E-01 | 1,00E+00 | AC154635.1 |  | 1,05  | No  |
| ENSMUSG00000113622 | 2,72E-01  | -1,333258764 | 3,10E-01  | 5,78E-01 | 8,35E-01 | AC124484.1 |  | 1,21  | No  |
| ENSMUSG00000113623 | 8,86E-02  | -2,070193101 | 1,73E-02  | 8,95E-01 | 1,00E+00 | AC122357.2 |  | 1,06  | No  |
| ENSMUSG00000113625 | -2,42E-01 | 7,132243962  | 1,61E+01  | 6,03E-05 | 1,59E-03 | AC121872.2 |  | 0,85  | Yes |
| ENSMUSG00000113626 | 3,68E-01  | 0,629974945  | 2,56E+00  | 1,09E-01 | 4,06E-01 | AC159290.1 |  | 1,29  | No  |
| ENSMUSG00000113630 | 1,86E+00  | -2,963235356 | 1,35E+00  | 2,46E-01 | 5,50E-01 | CT010460.2 |  | 3,62  | No  |
| ENSMUSG00000113631 | -8,49E-01 | -2,863692433 | 3,95E-01  | 5,30E-01 | 8,05E-01 | AC171003.1 |  | 0,56  | No  |
| ENSMUSG00000113632 | 2,65E+00  | -2,770586358 | 2,71E+00  | 9,99E-02 | 3,92E-01 | AC153794.2 |  | 6,28  | No  |
| ENSMUSG00000113634 | 1,12E+00  | -2,355524388 | 1,19E+00  | 2,76E-01 | 5,73E-01 | AC126262.2 |  | 2,17  | No  |
| ENSMUSG00000113636 | 3,18E-01  | 1,330381485  | 3,05E+00  | 8,06E-02 | 3,64E-01 | AC122379.2 |  | 1,25  | No  |
| ENSMUSG00000113637 | 3,25E-01  | 0,680521217  | 1,98E+00  | 1,60E-01 | 5,07E-01 | AC156572.1 |  | 1,25  | No  |
| ENSMUSG00000113640 | 1,61E-01  | 1,060708134  | 6,17E-01  | 4,32E-01 | 7,26E-01 | Adat3      |  | 1,12  | No  |
| ENSMUSG00000113642 | -8,16E-01 | -2,146027743 | 9,70E-01  | 3,25E-01 | 6,26E-01 | CT030170.6 |  | 0,57  | No  |
| ENSMUSG00000113644 | -2,22E+00 | -2,770605557 | 2,73E+00  | 9,87E-02 | 3,91E-01 | AC158354.1 |  | 0,22  | No  |
| ENSMUSG00000113645 | -8,24E-01 | -2,896084407 | 3,72E-01  | 5,42E-01 | 8,12E-01 | AC161117.2 |  | 0,56  | No  |
| ENSMUSG00000113646 | -1,92E+00 | -3,033623267 | 1,46E+00  | 2,27E-01 | 5,50E-01 | AC124601.2 |  | 0,26  | No  |
| ENSMUSG00000113647 | 2,15E-01  | 0,454726109  | 7,18E-01  | 3,97E-01 | 6,97E-01 | AC131739.1 |  | 1,16  | No  |
| ENSMUSG00000113648 | -1,95E+00 | -3,033628749 | 1,50E+00  | 2,21E-01 | 5,50E-01 | AC120540.1 |  | 0,26  | No  |
| ENSMUSG00000113649 | 3,77E+00  | -2,600789536 | 6,54E+00  | 1,05E-02 | 9,70E-02 | AC124183.1 |  | 13,64 | No  |
| ENSMUSG00000113650 | 2,79E-02  | -0,770529067 | 5,27E-03  | 9,42E-01 | 1,00E+00 | AC153144.1 |  | 1,02  | No  |
| ENSMUSG00000113651 | 7,91E-02  | 6,627317966  | 1,61E+00  | 2,04E-01 | 5,50E-01 | AC125190.3 |  | 1,06  | No  |
| ENSMUSG00000113656 | -3,34E-01 | -1,683120829 | 3,12E-01  | 5,76E-01 | 8,35E-01 | AC124516.3 |  | 0,79  | No  |
| ENSMUSG00000113660 | -1,99E-02 | 4,131693692  | 5,23E-02  | 8,19E-01 | 9,71E-01 | CT009718.7 |  | 0,99  | No  |
| ENSMUSG00000113662 | 1,01E-01  | 2,760383364  | 7,11E-01  | 3,99E-01 | 6,98E-01 | AC152827.2 |  | 1,07  | No  |
| ENSMUSG00000113664 | 1,34E-01  | 0,97057771   | 3,91E-01  | 5,32E-01 | 8,06E-01 | AC139382.1 |  | 1,10  | No  |

|                    |           |              |           |          |          |            |      |     |
|--------------------|-----------|--------------|-----------|----------|----------|------------|------|-----|
| ENSMUSG00000113665 | -3,72E-01 | -1,024573989 | 5,56E-01  | 4,56E-01 | 7,45E-01 | CT009757.5 | 0,77 | No  |
| ENSMUSG00000113668 | 3,04E-01  | 3,671930855  | 9,99E+00  | 1,58E-03 | 2,32E-02 | AC122295.1 | 1,23 | Yes |
| ENSMUSG00000113669 | 1,30E-01  | 3,856211018  | 2,07E+00  | 1,50E-01 | 4,91E-01 | AC163354.1 | 1,09 | No  |
| ENSMUSG00000113670 | -6,79E-01 | -3,070174214 | 1,84E-01  | 6,68E-01 | 8,87E-01 | AC166341.5 | 0,62 | No  |
| ENSMUSG00000113673 | 1,50E-02  | -1,311130447 | 9,15E-04  | 9,76E-01 | 1,00E+00 | AC127281.1 | 1,01 | No  |
| ENSMUSG00000113679 | -1,18E-01 | 2,514883768  | 8,29E-01  | 3,63E-01 | 6,64E-01 | AC159633.2 | 0,92 | No  |
| ENSMUSG00000113680 | 1,84E+00  | -3,033632273 | 1,33E+00  | 2,49E-01 | 5,50E-01 | AC158115.2 | 3,58 | No  |
| ENSMUSG00000113681 | -2,05E-01 | 0,199146882  | 5,43E-01  | 4,61E-01 | 7,50E-01 | AC127582.1 | 0,87 | No  |
| ENSMUSG00000113683 | -4,68E-01 | -0,971946159 | 1,19E+00  | 2,75E-01 | 5,71E-01 | CT030159.2 | 0,72 | No  |
| ENSMUSG00000113684 | 3,14E-02  | -3,107617333 | -7,69E-10 | 1,00E+00 | 1,00E+00 | AC155805.2 | 1,02 | No  |
| ENSMUSG00000113685 | -3,55E+00 | -2,8319544   | 5,67E+00  | 1,73E-02 | 1,37E-01 | AC211878.8 | 0,09 | No  |
| ENSMUSG00000113687 | -1,98E-01 | -0,770600236 | 2,25E-01  | 6,36E-01 | 8,67E-01 | AC123705.3 | 0,87 | No  |
| ENSMUSG00000113690 | 4,04E-01  | 2,599411255  | 1,04E+01  | 1,23E-03 | 1,92E-02 | CT030722.2 | 1,32 | Yes |
| ENSMUSG00000113691 | -5,69E-01 | -2,832045616 | 2,54E-01  | 6,14E-01 | 8,53E-01 | AC130824.1 | 0,67 | No  |
| ENSMUSG00000113692 | -1,88E+00 | -2,963233427 | 1,42E+00  | 2,33E-01 | 5,50E-01 | AC132587.1 | 0,27 | No  |
| ENSMUSG00000113693 | -2,39E+00 | -1,997978961 | 7,84E+00  | 5,11E-03 | 5,67E-02 | AC174776.2 | 0,19 | No  |
| ENSMUSG00000113694 | 2,06E-02  | -3,146103739 | -9,26E-10 | 1,00E+00 | 1,00E+00 | AC147241.1 | 1,01 | No  |
| ENSMUSG00000113696 | -9,58E-01 | -2,246960749 | 1,11E+00  | 2,92E-01 | 5,87E-01 | CT025616.4 | 0,51 | No  |
| ENSMUSG00000113701 | -4,61E-01 | 0,352115642  | 3,33E+00  | 6,82E-02 | 3,29E-01 | AC121583.1 | 0,73 | No  |
| ENSMUSG00000113702 | 1,87E+00  | -2,998011125 | 1,36E+00  | 2,43E-01 | 5,50E-01 | AC152827.3 | 3,66 | No  |
| ENSMUSG00000113706 | 2,90E-01  | -2,107606022 | 1,75E-01  | 6,76E-01 | 8,91E-01 | AC151982.1 | 1,22 | No  |
| ENSMUSG00000113707 | 7,12E-01  | -2,770653131 | 2,76E-01  | 5,99E-01 | 8,46E-01 | AC132325.2 | 1,64 | No  |
| ENSMUSG00000113708 | -1,89E+00 | -3,033648118 | 1,42E+00  | 2,33E-01 | 5,50E-01 | AC154382.1 | 0,27 | No  |
| ENSMUSG00000113715 | 1,87E+00  | -3,107639691 | 1,38E+00  | 2,40E-01 | 5,50E-01 | AC154742.2 | 3,67 | No  |
| ENSMUSG00000113717 | -3,83E-02 | -3,107651936 | -7,91E-11 | 1,00E+00 | 1,00E+00 | AC110901.1 | 0,97 | No  |
| ENSMUSG00000113718 | 8,99E-01  | -1,711788901 | 2,05E+00  | 1,52E-01 | 4,94E-01 | AC162934.4 | 1,86 | No  |
| ENSMUSG00000113722 | 7,20E-02  | -1,070235645 | 2,66E-02  | 8,70E-01 | 1,00E+00 | AC140477.3 | 1,05 | No  |
| ENSMUSG00000113724 | 8,75E-01  | -1,980613669 | 1,56E+00  | 2,12E-01 | 5,50E-01 | CT030146.2 | 1,83 | No  |
| ENSMUSG00000113726 | -5,41E-01 | 0,160024511  | 3,86E+00  | 4,96E-02 | 2,69E-01 | AL589871.1 | 0,69 | No  |
| ENSMUSG00000113728 | 3,21E-01  | 0,412653884  | 1,66E+00  | 1,98E-01 | 5,50E-01 | CT030657.3 | 1,25 | No  |
| ENSMUSG00000113731 | -4,18E-01 | -2,600632506 | 1,78E-01  | 6,73E-01 | 8,90E-01 | AC125484.2 | 0,75 | No  |
| ENSMUSG00000113732 | 1,14E+00  | -2,600702405 | 1,23E+00  | 2,66E-01 | 5,63E-01 | AC132336.3 | 2,20 | No  |

|                    |           |              |           |          |          |            |      |    |
|--------------------|-----------|--------------|-----------|----------|----------|------------|------|----|
| ENSMUSG00000113737 | -1,89E+00 | -3,1076441   | 1,42E+00  | 2,33E-01 | 5,50E-01 | AC160765.1 | 0,27 | No |
| ENSMUSG00000113738 | -1,75E-02 | -2,963227524 | 1,42E-04  | 9,90E-01 | 1,00E+00 | AC163631.1 | 0,99 | No |
| ENSMUSG00000113740 | -4,68E-01 | -2,711688772 | 2,25E-01  | 6,35E-01 | 8,67E-01 | AC125190.4 | 0,72 | No |
| ENSMUSG00000113741 | -1,87E-01 | 0,962451497  | 6,12E-01  | 4,34E-01 | 7,27E-01 | AC159635.2 | 0,88 | No |
| ENSMUSG00000113743 | -2,98E-02 | 4,95028787   | 1,59E-01  | 6,90E-01 | 8,99E-01 | AC137692.1 | 0,98 | No |
| ENSMUSG00000113745 | -1,89E+00 | -3,1076441   | 1,42E+00  | 2,33E-01 | 5,50E-01 | AC163354.2 | 0,27 | No |
| ENSMUSG00000113746 | 3,14E-02  | -3,107617333 | -7,69E-10 | 1,00E+00 | 1,00E+00 | AC130222.1 | 1,02 | No |
| ENSMUSG00000113749 | -5,07E-02 | 3,465848352  | 2,59E-01  | 6,11E-01 | 8,52E-01 | AC163633.1 | 0,97 | No |
| ENSMUSG00000113750 | -1,53E-01 | 0,858476753  | 5,32E-01  | 4,66E-01 | 7,54E-01 | CT009754.6 | 0,90 | No |
| ENSMUSG00000113752 | -1,57E-01 | 0,079226377  | 2,94E-01  | 5,88E-01 | 8,40E-01 | AC159244.3 | 0,90 | No |
| ENSMUSG00000113753 | -1,59E-01 | 0,827000251  | 5,06E-01  | 4,77E-01 | 7,65E-01 | AC156576.4 | 0,90 | No |
| ENSMUSG00000113755 | -1,94E+00 | -3,107619243 | 1,50E+00  | 2,21E-01 | 5,50E-01 | AC131743.3 | 0,26 | No |
| ENSMUSG00000113756 | -3,19E-01 | 1,050079854  | 2,39E+00  | 1,22E-01 | 4,37E-01 | CR974575.1 | 0,80 | No |
| ENSMUSG00000113757 | 4,96E-01  | 1,015169501  | 5,52E+00  | 1,87E-02 | 1,45E-01 | AC158535.1 | 1,41 | No |
| ENSMUSG00000113758 | -1,87E+00 | -3,107637761 | 1,39E+00  | 2,38E-01 | 5,50E-01 | AC122824.2 | 0,27 | No |
| ENSMUSG00000113759 | 2,12E-01  | -2,548239381 | 5,62E-02  | 8,13E-01 | 9,67E-01 | AC132239.2 | 1,16 | No |
| ENSMUSG00000113766 | 6,70E-01  | -2,963260367 | 2,39E-01  | 6,25E-01 | 8,59E-01 | AC167360.1 | 1,59 | No |
| ENSMUSG00000113767 | -7,76E-02 | -2,963273445 | 2,73E-03  | 9,58E-01 | 1,00E+00 | AC120540.2 | 0,95 | No |
| ENSMUSG00000113768 | 7,46E-01  | -2,033699056 | 9,95E-01  | 3,19E-01 | 6,19E-01 | AC238676.4 | 1,68 | No |
| ENSMUSG00000113769 | 1,57E-01  | 1,368663994  | 7,86E-01  | 3,75E-01 | 6,76E-01 | AC132623.2 | 1,11 | No |
| ENSMUSG00000113770 | 3,14E-02  | -3,107617333 | -7,69E-10 | 1,00E+00 | 1,00E+00 | AC132604.1 | 1,02 | No |
| ENSMUSG00000113773 | 1,31E+00  | -1,770581396 | 3,02E+00  | 8,22E-02 | 3,68E-01 | AC159203.2 | 2,47 | No |
| ENSMUSG00000113774 | 3,22E-02  | 0,745073128  | 2,09E-02  | 8,85E-01 | 1,00E+00 | AC159307.1 | 1,02 | No |
| ENSMUSG00000113775 | 1,19E-01  | -0,126858112 | 1,39E-01  | 7,09E-01 | 9,09E-01 | CT025604.2 | 1,09 | No |
| ENSMUSG00000113776 | -6,31E-01 | 1,128999534  | 8,13E+00  | 4,34E-03 | 5,03E-02 | AC125071.1 | 0,65 | No |
| ENSMUSG00000113780 | -3,07E-01 | -2,448702781 | 1,40E-01  | 7,08E-01 | 9,08E-01 | AC091785.2 | 0,81 | No |
| ENSMUSG00000113781 | 1,82E+00  | -3,070184963 | 1,30E+00  | 2,54E-01 | 5,50E-01 | AC152827.4 | 3,52 | No |
| ENSMUSG00000113786 | 2,70E-01  | 1,381558698  | 2,20E+00  | 1,38E-01 | 4,68E-01 | AC099934.7 | 1,21 | No |
| ENSMUSG00000113789 | 5,58E-01  | -0,92938185  | 1,70E+00  | 1,92E-01 | 5,50E-01 | AC139941.2 | 1,47 | No |
| ENSMUSG00000113790 | 5,09E-01  | -1,378306929 | 9,50E-01  | 3,30E-01 | 6,30E-01 | AC122371.6 | 1,42 | No |
| ENSMUSG00000113791 | -8,49E-01 | -2,711644958 | 3,95E-01  | 5,30E-01 | 8,05E-01 | AC136976.1 | 0,56 | No |
| ENSMUSG00000113792 | -1,27E-01 | 0,053698483  | 1,97E-01  | 6,58E-01 | 8,81E-01 | AC140376.1 | 0,92 | No |



|                    |           |              |           |          |          |             |      |     |
|--------------------|-----------|--------------|-----------|----------|----------|-------------|------|-----|
| ENSMUSG00000113795 | -8,45E-01 | -2,963265612 | 3,92E-01  | 5,31E-01 | 8,05E-01 | AC159625.1  | 0,56 | No  |
| ENSMUSG00000113800 | 2,64E+00  | -3,033673223 | 2,69E+00  | 1,01E-01 | 3,92E-01 | AC124179.2  | 6,23 | No  |
| ENSMUSG00000113801 | -3,83E-02 | -3,107651936 | -7,91E-11 | 1,00E+00 | 1,00E+00 | CT030687.2  | 0,97 | No  |
| ENSMUSG00000113804 | -8,70E-02 | -2,401413733 | 1,05E-02  | 9,18E-01 | 1,00E+00 | AC158990.1  | 0,94 | No  |
| ENSMUSG00000113805 | 1,81E+00  | -3,10765737  | 1,28E+00  | 2,58E-01 | 5,50E-01 | AC126554.8  | 3,49 | No  |
| ENSMUSG00000113807 | -7,38E-02 | 2,888358663  | 3,96E-01  | 5,29E-01 | 8,05E-01 | AC159190.2  | 0,95 | No  |
| ENSMUSG00000113811 | 2,74E-02  | 5,74564428   | 1,66E-01  | 6,84E-01 | 8,96E-01 | CT009546.3  | 1,02 | No  |
| ENSMUSG00000113812 | -2,85E-01 | -2,185600368 | 1,41E-01  | 7,07E-01 | 9,08E-01 | AC122357.3  | 0,82 | No  |
| ENSMUSG00000113814 | -4,86E-02 | -2,896141539 | 1,09E-03  | 9,74E-01 | 1,00E+00 | AC124739.4  | 0,97 | No  |
| ENSMUSG00000113816 | 1,07E-01  | 1,610104386  | 4,06E-01  | 5,24E-01 | 8,01E-01 | CT030159.3  | 1,08 | No  |
| ENSMUSG00000113817 | 5,37E-01  | -1,57431912  | 9,88E-01  | 3,20E-01 | 6,21E-01 | AC131759.1  | 1,45 | No  |
| ENSMUSG00000113819 | 1,88E+00  | -2,770663163 | 2,62E+00  | 1,06E-01 | 3,98E-01 | CT009546.4  | 3,68 | No  |
| ENSMUSG00000113827 | 1,85E+00  | -3,107657832 | 1,35E+00  | 2,46E-01 | 5,50E-01 | CT030011.1  | 3,61 | No  |
| ENSMUSG00000113830 | -8,82E-01 | -2,963247103 | 4,30E-01  | 5,12E-01 | 7,95E-01 | AC160929.1  | 0,54 | No  |
| ENSMUSG00000113831 | -2,00E-01 | 1,160509365  | 9,95E-01  | 3,18E-01 | 6,19E-01 | AC163032.1  | 0,87 | No  |
| ENSMUSG00000113833 | 2,57E-01  | -0,522679916 | 4,96E-01  | 4,81E-01 | 7,69E-01 | CU024890.1  | 1,19 | No  |
| ENSMUSG00000113835 | -3,65E-01 | -0,755548515 | 8,98E-01  | 3,43E-01 | 6,44E-01 | AC144543.2  | 0,78 | No  |
| ENSMUSG00000113836 | 9,93E-02  | 2,135227085  | 4,92E-01  | 4,83E-01 | 7,70E-01 | AC124426.4  | 1,07 | No  |
| ENSMUSG00000113838 | -2,84E-01 | 2,984912467  | 6,30E+00  | 1,21E-02 | 1,07E-01 | AC079644.14 | 0,82 | No  |
| ENSMUSG00000113840 | 1,87E+00  | -3,03364371  | 1,36E+00  | 2,43E-01 | 5,50E-01 | AC163286.2  | 3,66 | No  |
| ENSMUSG00000113841 | -1,57E-01 | -0,195381157 | 2,76E-01  | 5,99E-01 | 8,46E-01 | AC122357.4  | 0,90 | No  |
| ENSMUSG00000113842 | -1,69E+00 | -1,963122915 | 3,15E+00  | 7,61E-02 | 3,52E-01 | AC122828.3  | 0,31 | No  |
| ENSMUSG00000113843 | -2,77E-01 | 0,776406818  | 1,54E+00  | 2,15E-01 | 5,50E-01 | AC129019.2  | 0,83 | No  |
| ENSMUSG00000113845 | 2,54E-01  | -1,522766171 | 2,16E-01  | 6,42E-01 | 8,71E-01 | AC131762.1  | 1,19 | No  |
| ENSMUSG00000113846 | 3,14E-02  | -3,107617333 | -7,69E-10 | 1,00E+00 | 1,00E+00 | AC125444.2  | 1,02 | No  |
| ENSMUSG00000113847 | 1,18E+00  | -2,033706415 | 2,37E+00  | 1,24E-01 | 4,40E-01 | CT009754.7  | 2,27 | No  |
| ENSMUSG00000113850 | 3,14E-02  | -3,107617333 | -7,69E-10 | 1,00E+00 | 1,00E+00 | AC156576.5  | 1,02 | No  |
| ENSMUSG00000113852 | -4,37E-01 | 0,248081559  | 2,69E+00  | 1,01E-01 | 3,93E-01 | AC159193.5  | 0,74 | No  |
| ENSMUSG00000113853 | -2,38E-01 | -0,205863987 | 6,11E-01  | 4,34E-01 | 7,27E-01 | CT009757.6  | 0,85 | No  |
| ENSMUSG00000113854 | 8,25E-01  | -2,548264773 | 5,91E-01  | 4,42E-01 | 7,34E-01 | CT954323.6  | 1,77 | No  |
| ENSMUSG00000113856 | -4,65E-02 | -2,770639345 | 1,47E-03  | 9,69E-01 | 1,00E+00 | AC165247.1  | 0,97 | No  |
| ENSMUSG00000113858 | -6,24E-01 | 1,520968375  | 1,30E+01  | 3,18E-04 | 6,35E-03 | CT025645.4  | 0,65 | Yes |

|                    |           |              |           |          |          |             |      |    |
|--------------------|-----------|--------------|-----------|----------|----------|-------------|------|----|
| ENSMUSG00000113859 | 3,46E-01  | -0,216191419 | 1,05E+00  | 3,05E-01 | 6,01E-01 | AC154389.1  | 1,27 | No |
| ENSMUSG00000113860 | 3,14E-02  | -3,107617333 | -7,69E-10 | 1,00E+00 | 1,00E+00 | AC135667.1  | 1,02 | No |
| ENSMUSG00000113861 | -8,35E-03 | 2,846481706  | 5,19E-03  | 9,43E-01 | 1,00E+00 | CT485612.10 | 0,99 | No |
| ENSMUSG00000113862 | -1,06E-01 | 2,609386264  | 6,84E-01  | 4,08E-01 | 7,05E-01 | CU024886.1  | 0,93 | No |
| ENSMUSG00000113863 | -7,45E-02 | 0,63302764   | 9,45E-02  | 7,59E-01 | 9,36E-01 | CR974429.3  | 0,95 | No |
| ENSMUSG00000113864 | 1,19E+00  | -2,832059907 | 8,74E-01  | 3,50E-01 | 6,51E-01 | AC160340.1  | 2,28 | No |
| ENSMUSG00000113865 | 6,48E-02  | 0,338100153  | 6,22E-02  | 8,03E-01 | 9,62E-01 | CT573034.4  | 1,05 | No |
| ENSMUSG00000113866 | 1,27E+00  | -2,8320086   | 1,01E+00  | 3,15E-01 | 6,16E-01 | AC124752.1  | 2,42 | No |
| ENSMUSG00000113869 | -3,21E+00 | -2,896123391 | 4,35E+00  | 3,69E-02 | 2,28E-01 | AC131743.4  | 0,11 | No |
| ENSMUSG00000113871 | 7,56E-02  | -1,024639454 | 3,30E-02  | 8,56E-01 | 9,93E-01 | AC134439.2  | 1,05 | No |
| ENSMUSG00000113872 | 3,10E+00  | -2,832069051 | 3,92E+00  | 4,77E-02 | 2,62E-01 | AC160929.2  | 8,57 | No |
| ENSMUSG00000113877 | -1,87E+00 | -3,107637761 | 1,39E+00  | 2,38E-01 | 5,50E-01 | AC155266.1  | 0,27 | No |
| ENSMUSG00000113878 | -1,04E+00 | -1,832004772 | 2,38E+00  | 1,23E-01 | 4,37E-01 | AC159620.1  | 0,49 | No |
| ENSMUSG00000113880 | 4,92E-01  | -2,070222982 | 4,70E-01  | 4,93E-01 | 7,79E-01 | AC125444.3  | 1,41 | No |
| ENSMUSG00000113881 | 1,62E-03  | -2,963242114 | -1,56E-12 | 1,00E+00 | 1,00E+00 | AC132954.3  | 1,00 | No |
| ENSMUSG00000113883 | 2,61E+00  | -3,033672762 | 2,63E+00  | 1,05E-01 | 3,97E-01 | AC161117.3  | 6,10 | No |
| ENSMUSG00000113885 | -2,27E+00 | -2,448592687 | 4,19E+00  | 4,06E-02 | 2,39E-01 | AC153144.2  | 0,21 | No |
| ENSMUSG00000113886 | -6,93E-01 | -2,088716662 | 7,35E-01  | 3,91E-01 | 6,91E-01 | AC136986.1  | 0,62 | No |
| ENSMUSG00000113887 | 1,87E+00  | -3,107639691 | 1,38E+00  | 2,40E-01 | 5,50E-01 | AC159290.2  | 3,67 | No |
| ENSMUSG00000113889 | -1,87E+00 | -3,03364178  | 1,41E+00  | 2,36E-01 | 5,50E-01 | AC156569.1  | 0,27 | No |
| ENSMUSG00000113890 | -2,65E+00 | -3,033633091 | 2,78E+00  | 9,55E-02 | 3,86E-01 | AC155245.1  | 0,16 | No |
| ENSMUSG00000113891 | -1,89E+00 | -3,1076441   | 1,42E+00  | 2,33E-01 | 5,50E-01 | AC124171.3  | 0,27 | No |
| ENSMUSG00000113894 | -6,04E-02 | 2,97899442   | 2,81E-01  | 5,96E-01 | 8,44E-01 | AC129597.1  | 0,96 | No |
| ENSMUSG00000113895 | -2,78E-02 | -2,497504832 | 6,22E-04  | 9,80E-01 | 1,00E+00 | AC123705.4  | 0,98 | No |
| ENSMUSG00000113898 | 1,93E-01  | 2,902855375  | 2,84E+00  | 9,19E-02 | 3,82E-01 | AC166827.2  | 1,14 | No |
| ENSMUSG00000113899 | -4,13E-02 | 0,445698606  | 2,76E-02  | 8,68E-01 | 1,00E+00 | CT030657.4  | 0,97 | No |
| ENSMUSG00000113902 | -9,62E-02 | 5,781403262  | 2,08E+00  | 1,50E-01 | 4,91E-01 | AC121965.1  | 0,94 | No |
| ENSMUSG00000113903 | -1,34E+00 | -2,832021583 | 1,12E+00  | 2,89E-01 | 5,85E-01 | CT485612.11 | 0,40 | No |
| ENSMUSG00000113904 | 9,01E-03  | -3,107646452 | -5,16E-10 | 1,00E+00 | 1,00E+00 | AC123043.3  | 1,01 | No |
| ENSMUSG00000113905 | -5,65E-01 | -1,561204322 | 7,90E-01  | 3,74E-01 | 6,75E-01 | AC133934.2  | 0,68 | No |
| ENSMUSG00000113907 | 4,15E-01  | 0,2809591    | 2,48E+00  | 1,16E-01 | 4,21E-01 | AC122367.2  | 1,33 | No |
| ENSMUSG00000113908 | -1,87E+00 | -3,107637761 | 1,39E+00  | 2,38E-01 | 5,50E-01 | CT030187.8  | 0,27 | No |

|                    |           |              |           |          |          |             |      |     |
|--------------------|-----------|--------------|-----------|----------|----------|-------------|------|-----|
| ENSMUSG00000113909 | 4,77E-01  | -0,122136164 | 2,31E+00  | 1,29E-01 | 4,50E-01 | AC113508.4  | 1,39 | No  |
| ENSMUSG00000113910 | -3,59E+00 | -2,600616999 | 5,79E+00  | 1,62E-02 | 1,32E-01 | AC160972.1  | 0,08 | No  |
| ENSMUSG00000113914 | -2,78E-01 | -1,627618929 | 2,02E-01  | 6,53E-01 | 8,78E-01 | CT030166.5  | 0,82 | No  |
| ENSMUSG00000113917 | 2,92E-01  | -0,863573303 | 4,05E-01  | 5,25E-01 | 8,02E-01 | AC160340.2  | 1,22 | No  |
| ENSMUSG00000113918 | 4,30E-02  | -0,126432761 | 1,97E-02  | 8,88E-01 | 1,00E+00 | AC132609.2  | 1,03 | No  |
| ENSMUSG00000113921 | 1,87E+00  | -3,107639691 | 1,38E+00  | 2,40E-01 | 5,50E-01 | AC162934.5  | 3,67 | No  |
| ENSMUSG00000113922 | -3,19E+00 | -2,831962229 | 4,29E+00  | 3,83E-02 | 2,32E-01 | AC131743.5  | 0,11 | No  |
| ENSMUSG00000113923 | -5,63E-01 | -2,832039284 | 2,48E-01  | 6,18E-01 | 8,56E-01 | CT010471.2  | 0,68 | No  |
| ENSMUSG00000113924 | -1,36E+00 | -2,831937827 | 1,15E+00  | 2,83E-01 | 5,79E-01 | AC156560.3  | 0,39 | No  |
| ENSMUSG00000113926 | 4,88E-01  | -2,711707727 | 1,86E-01  | 6,66E-01 | 8,85E-01 | AC132623.3  | 1,40 | No  |
| ENSMUSG00000113931 | 3,81E-01  | -0,980351517 | 6,71E-01  | 4,13E-01 | 7,08E-01 | AC154221.1  | 1,30 | No  |
| ENSMUSG00000113934 | -4,78E-02 | 3,275102161  | 2,06E-01  | 6,50E-01 | 8,76E-01 | AC154558.1  | 0,97 | No  |
| ENSMUSG00000113936 | 5,04E-02  | 5,366951881  | 5,15E-01  | 4,73E-01 | 7,61E-01 | AC131743.6  | 1,04 | No  |
| ENSMUSG00000113938 | 2,67E+00  | -2,963223118 | 2,76E+00  | 9,68E-02 | 3,88E-01 | AC079644.15 | 6,39 | No  |
| ENSMUSG00000113939 | -1,87E+00 | -3,107637761 | 1,39E+00  | 2,38E-01 | 5,50E-01 | AC159293.2  | 0,27 | No  |
| ENSMUSG00000113946 | 2,62E-01  | -1,12669533  | 2,88E-01  | 5,92E-01 | 8,42E-01 | AC154552.5  | 1,20 | No  |
| ENSMUSG00000113948 | -2,14E-01 | 7,096127841  | 1,25E+01  | 3,96E-04 | 7,57E-03 | AC147029.1  | 0,86 | Yes |
| ENSMUSG00000113949 | 1,22E-01  | 4,519437637  | 2,30E+00  | 1,29E-01 | 4,52E-01 | Scamp4      | 1,09 | No  |
| ENSMUSG00000113950 | 1,87E+00  | -3,107639691 | 1,38E+00  | 2,40E-01 | 5,50E-01 | AC124595.2  | 3,67 | No  |
| ENSMUSG00000113951 | -3,04E-02 | -2,832001214 | 5,89E-04  | 9,81E-01 | 1,00E+00 | AC211878.11 | 0,98 | No  |
| ENSMUSG00000113959 | 1,67E-01  | -1,333218004 | 1,27E-01  | 7,21E-01 | 9,16E-01 | AC124739.5  | 1,12 | No  |
| ENSMUSG00000113960 | 1,91E+00  | -2,711733573 | 2,73E+00  | 9,83E-02 | 3,91E-01 | AC173210.4  | 3,77 | No  |
| ENSMUSG00000113961 | -2,66E+00 | -3,033639428 | 2,81E+00  | 9,35E-02 | 3,83E-01 | AC132221.1  | 0,16 | No  |
| ENSMUSG00000113963 | 2,85E-02  | -0,145933149 | 8,36E-03  | 9,27E-01 | 1,00E+00 | AC091683.4  | 1,02 | No  |
| ENSMUSG00000113965 | -1,73E+00 | -2,7705623   | 2,08E+00  | 1,49E-01 | 4,90E-01 | AL645664.1  | 0,30 | No  |
| ENSMUSG00000113966 | 8,43E-01  | -2,655163736 | 6,19E-01  | 4,31E-01 | 7,25E-01 | AC122811.2  | 1,79 | No  |
| ENSMUSG00000113971 | 3,14E-02  | -3,107617333 | -7,69E-10 | 1,00E+00 | 1,00E+00 | Gm2022      | 1,02 | No  |
| ENSMUSG00000113973 | -3,83E-02 | -3,107651936 | -7,91E-11 | 1,00E+00 | 1,00E+00 | AC125444.5  | 0,97 | No  |
| ENSMUSG00000113974 | 3,14E-02  | -3,107617333 | -7,69E-10 | 1,00E+00 | 1,00E+00 | AC131762.2  | 1,02 | No  |
| ENSMUSG00000113977 | -5,86E-02 | -2,548223961 | 3,91E-03  | 9,50E-01 | 1,00E+00 | AC170597.2  | 0,96 | No  |
| ENSMUSG00000113980 | -2,84E-01 | 0,518174618  | 1,34E+00  | 2,48E-01 | 5,50E-01 | AC123920.1  | 0,82 | No  |
| ENSMUSG00000113983 | -5,08E-03 | 0,768571886  | 4,77E-04  | 9,83E-01 | 1,00E+00 | CR974487.1  | 1,00 | No  |

|                    |           |              |           |          |          |             |      |     |
|--------------------|-----------|--------------|-----------|----------|----------|-------------|------|-----|
| ENSMUSG00000113984 | -2,82E+00 | -2,401311412 | 7,66E+00  | 5,63E-03 | 6,10E-02 | AC131743.7  | 0,14 | No  |
| ENSMUSG00000113985 | 7,64E-02  | 1,184051878  | 1,53E-01  | 6,95E-01 | 9,02E-01 | AC114412.2  | 1,05 | No  |
| ENSMUSG00000113986 | -1,86E+00 | -3,033612668 | 1,39E+00  | 2,38E-01 | 5,50E-01 | CT010462.2  | 0,28 | No  |
| ENSMUSG00000113987 | -2,68E+00 | -3,033645766 | 2,84E+00  | 9,17E-02 | 3,82E-01 | AC126426.1  | 0,16 | No  |
| ENSMUSG00000113991 | -7,56E-02 | -2,770644361 | 3,87E-03  | 9,50E-01 | 1,00E+00 | AC211878.12 | 0,95 | No  |
| ENSMUSG00000113995 | -1,94E+00 | -3,107619243 | 1,50E+00  | 2,21E-01 | 5,50E-01 | AC140477.4  | 0,26 | No  |
| ENSMUSG00000113996 | 8,01E-02  | 2,900673757  | 4,73E-01  | 4,92E-01 | 7,78E-01 | CT030166.6  | 1,06 | No  |
| ENSMUSG00000113999 | 1,86E-01  | 0,425881997  | 5,40E-01  | 4,63E-01 | 7,51E-01 | AC132954.4  | 1,14 | No  |
| ENSMUSG00000114001 | 1,87E+00  | -3,107639691 | 1,38E+00  | 2,40E-01 | 5,50E-01 | AC159629.1  | 3,67 | No  |
| ENSMUSG00000114003 | -1,93E-01 | 8,545858641  | 1,13E+01  | 7,70E-04 | 1,30E-02 | AC124744.2  | 0,87 | Yes |
| ENSMUSG00000114004 | -1,18E-01 | -0,48312028  | 1,05E-01  | 7,46E-01 | 9,29E-01 | AC155937.1  | 0,92 | No  |
| ENSMUSG00000114014 | 3,05E-01  | -0,141369389 | 8,70E-01  | 3,51E-01 | 6,52E-01 | AC134439.3  | 1,24 | No  |
| ENSMUSG00000114016 | 3,29E-01  | -0,25770072  | 1,09E+00  | 2,96E-01 | 5,92E-01 | AC154552.7  | 1,26 | No  |
| ENSMUSG00000114019 | 5,54E-02  | 0,372408108  | 4,82E-02  | 8,26E-01 | 9,75E-01 | AC154231.4  | 1,04 | No  |
| ENSMUSG00000114021 | 3,14E-02  | -3,107617333 | -7,69E-10 | 1,00E+00 | 1,00E+00 | AC142227.1  | 1,02 | No  |
| ENSMUSG00000114023 | -1,87E-01 | 3,794925504  | 4,11E+00  | 4,26E-02 | 2,46E-01 | CT030657.5  | 0,88 | No  |
| ENSMUSG00000114024 | -2,65E+00 | -3,033633091 | 2,78E+00  | 9,55E-02 | 3,86E-01 | AC159815.2  | 0,16 | No  |
| ENSMUSG00000114025 | -8,79E-02 | 0,768226702  | 1,67E-01  | 6,83E-01 | 8,95E-01 | AC154636.3  | 0,94 | No  |
| ENSMUSG00000114033 | 4,45E-01  | -0,655311957 | 1,43E+00  | 2,32E-01 | 5,50E-01 | AC116680.1  | 1,36 | No  |
| ENSMUSG00000114034 | -3,83E-02 | -3,107651936 | -7,91E-11 | 1,00E+00 | 1,00E+00 | AC139238.2  | 0,97 | No  |
| ENSMUSG00000114036 | -9,53E-02 | 3,85173101   | 1,08E+00  | 3,00E-01 | 5,96E-01 | AC124426.5  | 0,94 | No  |
| ENSMUSG00000114041 | -1,87E+00 | -3,033619006 | 1,41E+00  | 2,36E-01 | 5,50E-01 | AC165157.6  | 0,27 | No  |
| ENSMUSG00000114045 | 3,83E-01  | -0,460536058 | 1,31E+00  | 2,53E-01 | 5,50E-01 | AC152061.1  | 1,30 | No  |
| ENSMUSG00000114046 | -2,43E-02 | 2,51521692   | 3,50E-02  | 8,52E-01 | 9,90E-01 | AC124712.1  | 0,98 | No  |
| ENSMUSG00000114047 | 1,25E+00  | -2,711663345 | 9,68E-01  | 3,25E-01 | 6,26E-01 | AC155300.4  | 2,38 | No  |
| ENSMUSG00000114049 | 7,00E-01  | -1,472977833 | 1,55E+00  | 2,14E-01 | 5,50E-01 | AC122228.1  | 1,62 | No  |
| ENSMUSG00000114050 | -1,96E-01 | 0,148213996  | 4,65E-01  | 4,95E-01 | 7,81E-01 | AC055772.2  | 0,87 | No  |
| ENSMUSG00000114051 | -9,12E-01 | -1,980546159 | 1,77E+00  | 1,83E-01 | 5,46E-01 | AC134328.1  | 0,53 | No  |
| ENSMUSG00000114053 | -6,22E-01 | 1,221898753  | 1,12E+01  | 8,20E-04 | 1,37E-02 | AC133498.1  | 0,65 | Yes |
| ENSMUSG00000114055 | -1,25E-01 | 4,445413097  | 2,30E+00  | 1,29E-01 | 4,52E-01 | AC148334.2  | 0,92 | No  |
| ENSMUSG00000114056 | -2,64E-01 | -1,44863052  | 2,61E-01  | 6,09E-01 | 8,51E-01 | AC148334.3  | 0,83 | No  |
| ENSMUSG00000114057 | -2,65E+00 | -3,033633091 | 2,78E+00  | 9,55E-02 | 3,86E-01 | AC121583.2  | 0,16 | No  |

|                    |           |              |           |          |          |             |      |    |
|--------------------|-----------|--------------|-----------|----------|----------|-------------|------|----|
| ENSMUSG00000114059 | -3,44E-01 | -0,460771182 | 9,04E-01  | 3,42E-01 | 6,42E-01 | AC126554.9  | 0,79 | No |
| ENSMUSG00000114063 | 1,81E+00  | -3,10765737  | 1,28E+00  | 2,58E-01 | 5,50E-01 | AC124356.2  | 3,49 | No |
| ENSMUSG00000114066 | -3,26E-01 | 2,299026209  | 5,58E+00  | 1,81E-02 | 1,42E-01 | AC158354.2  | 0,80 | No |
| ENSMUSG00000114067 | -1,44E+00 | -2,683147496 | 1,72E+00  | 1,90E-01 | 5,50E-01 | AC161117.4  | 0,37 | No |
| ENSMUSG00000114068 | 9,01E-03  | -3,107646452 | -5,16E-10 | 1,00E+00 | 1,00E+00 | CT010431.1  | 1,01 | No |
| ENSMUSG00000114070 | -8,32E-01 | -2,655160423 | 3,81E-01  | 5,37E-01 | 8,09E-01 | AC123062.1  | 0,56 | No |
| ENSMUSG00000114072 | -1,58E+00 | -3,034361357 | 1,05E+00  | 3,06E-01 | 6,04E-01 | CT030159.4  | 0,33 | No |
| ENSMUSG00000114075 | -5,88E-02 | -3,033616507 | 1,62E-03  | 9,68E-01 | 1,00E+00 | AC079644.16 | 0,96 | No |
| ENSMUSG00000114081 | -8,17E-01 | -0,246916279 | 6,00E+00  | 1,43E-02 | 1,22E-01 | AC136986.2  | 0,57 | No |
| ENSMUSG00000114086 | -3,17E+00 | -2,83199425  | 4,24E+00  | 3,94E-02 | 2,35E-01 | CR974487.2  | 0,11 | No |
| ENSMUSG00000114090 | 1,81E+00  | -3,10765737  | 1,28E+00  | 2,58E-01 | 5,50E-01 | CT868733.1  | 3,49 | No |
| ENSMUSG00000114092 | -1,90E+00 | -3,033647263 | 1,44E+00  | 2,30E-01 | 5,50E-01 | AC154248.2  | 0,27 | No |
| ENSMUSG00000114094 | -3,01E-01 | -0,097928289 | 1,07E+00  | 3,02E-01 | 5,98E-01 | AC124732.4  | 0,81 | No |
| ENSMUSG00000114095 | 5,10E-01  | -1,863639409 | 5,03E-01  | 4,78E-01 | 7,66E-01 | AC154248.3  | 1,42 | No |
| ENSMUSG00000114098 | 1,87E+00  | -3,033632735 | 1,36E+00  | 2,43E-01 | 5,50E-01 | AC151530.1  | 3,66 | No |
| ENSMUSG00000114099 | 7,72E-02  | -2,378301711 | 7,87E-03  | 9,29E-01 | 1,00E+00 | AC112146.1  | 1,05 | No |
| ENSMUSG00000114102 | -3,62E-02 | 1,806945441  | 5,03E-02  | 8,23E-01 | 9,73E-01 | AC139568.3  | 0,98 | No |
| ENSMUSG00000114103 | -6,71E-01 | -1,205739196 | 2,32E+00  | 1,28E-01 | 4,48E-01 | CT030249.1  | 0,63 | No |
| ENSMUSG00000114104 | 3,45E-01  | -1,289516067 | 3,16E-01  | 5,74E-01 | 8,33E-01 | CT009757.7  | 1,27 | No |
| ENSMUSG00000114105 | -3,76E-01 | -1,205730874 | 6,42E-01  | 4,23E-01 | 7,18E-01 | AC163354.3  | 0,77 | No |
| ENSMUSG00000114106 | 4,87E-02  | -0,896129679 | 1,27E-02  | 9,10E-01 | 1,00E+00 | AC132315.1  | 1,03 | No |
| ENSMUSG00000114107 | 8,72E-01  | -2,185679573 | 1,17E+00  | 2,80E-01 | 5,77E-01 | AC166358.10 | 1,83 | No |
| ENSMUSG00000114110 | 6,36E-02  | 2,516457662  | 2,41E-01  | 6,24E-01 | 8,58E-01 | AC153152.5  | 1,05 | No |
| ENSMUSG00000114113 | 1,70E-01  | 1,24580048   | 8,09E-01  | 3,68E-01 | 6,70E-01 | AC131759.2  | 1,13 | No |
| ENSMUSG00000114114 | -9,86E-01 | -2,497548525 | 1,18E+00  | 2,78E-01 | 5,74E-01 | AC154368.2  | 0,50 | No |
| ENSMUSG00000114117 | 2,94E-01  | -0,327701562 | 8,05E-01  | 3,70E-01 | 6,71E-01 | AC156572.2  | 1,23 | No |
| ENSMUSG00000114118 | -1,49E+00 | -2,40132652  | 2,29E+00  | 1,30E-01 | 4,52E-01 | AC210924.1  | 0,36 | No |
| ENSMUSG00000114121 | -3,83E-02 | -3,107651936 | -7,91E-11 | 1,00E+00 | 1,00E+00 | AC124465.1  | 0,97 | No |
| ENSMUSG00000114123 | 1,87E+00  | -3,03364371  | 1,36E+00  | 2,43E-01 | 5,50E-01 | AC167420.1  | 3,66 | No |
| ENSMUSG00000114125 | 1,33E-01  | -2,683192571 | 1,71E-02  | 8,96E-01 | 1,00E+00 | CT025556.3  | 1,10 | No |
| ENSMUSG00000114127 | 1,69E-01  | -0,740847064 | 2,09E-01  | 6,47E-01 | 8,75E-01 | AC132344.3  | 1,12 | No |
| ENSMUSG00000114129 | -1,24E+00 | -3,107644849 | 7,21E-01  | 3,96E-01 | 6,96E-01 | AC164424.5  | 0,42 | No |

|                    |           |              |           |          |          |            |      |     |
|--------------------|-----------|--------------|-----------|----------|----------|------------|------|-----|
| ENSMUSG00000114131 | 1,84E+00  | -2,896172987 | 1,33E+00  | 2,49E-01 | 5,50E-01 | AC154733.1 | 3,58 | No  |
| ENSMUSG00000114133 | 6,54E-02  | 4,838819326  | 7,42E-01  | 3,89E-01 | 6,89E-01 | BTF3L4     | 1,05 | No  |
| ENSMUSG00000114134 | -8,33E-01 | -2,896090741 | 3,80E-01  | 5,37E-01 | 8,09E-01 | AC132324.1 | 0,56 | No  |
| ENSMUSG00000114135 | -3,37E-01 | 1,140542266  | 2,80E+00  | 9,46E-02 | 3,85E-01 | AC129022.1 | 0,79 | No  |
| ENSMUSG00000114136 | -5,27E-01 | 1,322380173  | 8,38E+00  | 3,79E-03 | 4,54E-02 | CT010452.1 | 0,69 | Yes |
| ENSMUSG00000114137 | -1,87E+00 | -3,107637761 | 1,39E+00  | 2,38E-01 | 5,50E-01 | AC134596.3 | 0,27 | No  |
| ENSMUSG00000114138 | -3,37E-02 | 2,511332357  | 6,70E-02  | 7,96E-01 | 9,57E-01 | AC153144.3 | 0,98 | No  |
| ENSMUSG00000114141 | 1,82E+00  | -3,033661385 | 1,31E+00  | 2,52E-01 | 5,50E-01 | AC145348.1 | 3,54 | No  |
| ENSMUSG00000114147 | 2,57E-02  | 3,796959108  | 7,57E-02  | 7,83E-01 | 9,50E-01 | AC134468.3 | 1,02 | No  |
| ENSMUSG00000114148 | -1,06E-01 | -3,033634182 | 5,86E-03  | 9,39E-01 | 1,00E+00 | CT010478.3 | 0,93 | No  |
| ENSMUSG00000114150 | 3,48E-01  | -1,614118585 | 3,08E-01  | 5,79E-01 | 8,36E-01 | AC132954.5 | 1,27 | No  |
| ENSMUSG00000114152 | 1,08E-01  | 3,022007038  | 9,41E-01  | 3,32E-01 | 6,32E-01 | CT030184.4 | 1,08 | No  |
| ENSMUSG00000114154 | 2,42E-01  | -1,998079614 | 1,36E-01  | 7,12E-01 | 9,11E-01 | AC174082.2 | 1,18 | No  |
| ENSMUSG00000114155 | 1,08E+00  | -2,655215795 | 1,10E+00  | 2,95E-01 | 5,91E-01 | CR974486.2 | 2,11 | No  |
| ENSMUSG00000114157 | 5,74E-01  | -0,367014063 | 2,43E+00  | 1,19E-01 | 4,30E-01 | AC159621.2 | 1,49 | No  |
| ENSMUSG00000114160 | 2,95E-01  | -1,963294328 | 1,81E-01  | 6,70E-01 | 8,88E-01 | AC174776.3 | 1,23 | No  |
| ENSMUSG00000114162 | -1,87E+00 | -3,107637761 | 1,39E+00  | 2,38E-01 | 5,50E-01 | AC154713.1 | 0,27 | No  |
| ENSMUSG00000114165 | 7,47E-01  | 0,313291874  | 7,42E+00  | 6,46E-03 | 6,77E-02 | AC158990.2 | 1,68 | No  |
| ENSMUSG00000114167 | 5,29E-02  | 3,708751919  | 3,12E-01  | 5,76E-01 | 8,35E-01 | CT868733.2 | 1,04 | No  |
| ENSMUSG00000114168 | 1,84E+00  | -2,378310077 | 4,02E+00  | 4,51E-02 | 2,53E-01 | AC156576.6 | 3,58 | No  |
| ENSMUSG00000114169 | -1,14E+00 | -1,448577892 | 3,41E+00  | 6,48E-02 | 3,19E-01 | AC120347.2 | 0,45 | No  |
| ENSMUSG00000114170 | 7,49E-01  | -0,024931204 | 5,83E+00  | 1,58E-02 | 1,30E-01 | AC129019.3 | 1,68 | No  |
| ENSMUSG00000114172 | 2,79E-01  | 0,87348154   | 1,78E+00  | 1,83E-01 | 5,45E-01 | CT030240.1 | 1,21 | No  |
| ENSMUSG00000114175 | 7,96E-01  | -0,436773218 | 4,93E+00  | 2,65E-02 | 1,82E-01 | AC091683.5 | 1,74 | No  |
| ENSMUSG00000114177 | 8,31E-01  | -1,107636086 | 3,46E+00  | 6,29E-02 | 3,13E-01 | CT009754.9 | 1,78 | No  |
| ENSMUSG00000114178 | 9,01E-03  | -3,107646452 | -5,16E-10 | 1,00E+00 | 1,00E+00 | AC159813.3 | 1,01 | No  |
| ENSMUSG00000114179 | -3,06E-01 | 0,432638807  | 1,30E+00  | 2,54E-01 | 5,50E-01 | AC159190.3 | 0,81 | No  |
| ENSMUSG00000114184 | 5,94E-02  | 5,502303886  | 7,39E-01  | 3,90E-01 | 6,90E-01 | AC122367.3 | 1,04 | No  |
| ENSMUSG00000114185 | -1,07E+00 | 1,94066507   | 5,16E+01  | 6,69E-13 | 8,32E-11 | AL589871.2 | 0,48 | Yes |
| ENSMUSG00000114186 | 1,87E+00  | -3,107639691 | 1,38E+00  | 2,40E-01 | 5,50E-01 | AC132596.1 | 3,67 | No  |
| ENSMUSG00000114188 | 7,04E-01  | -1,600669827 | 1,34E+00  | 2,47E-01 | 5,50E-01 | AC124772.5 | 1,63 | No  |
| ENSMUSG00000114189 | 1,87E+00  | -3,03364371  | 1,36E+00  | 2,43E-01 | 5,50E-01 | AC134608.1 | 3,66 | No  |

|                    |           |              |          |          |          |            |      |     |
|--------------------|-----------|--------------|----------|----------|----------|------------|------|-----|
| ENSMUSG00000114190 | -2,84E-02 | -2,998037081 | 4,52E-11 | 1,00E+00 | 1,00E+00 | AC133083.4 | 0,98 | No  |
| ENSMUSG00000114193 | -2,13E-01 | 0,766131809  | 8,24E-01 | 3,64E-01 | 6,65E-01 | AC122828.4 | 0,86 | No  |
| ENSMUSG00000114194 | -1,90E+00 | -3,033594154 | 1,44E+00 | 2,30E-01 | 5,50E-01 | AC154552.9 | 0,27 | No  |
| ENSMUSG00000114196 | -3,13E-01 | -1,711702211 | 2,74E-01 | 6,01E-01 | 8,47E-01 | AC154597.1 | 0,80 | No  |
| ENSMUSG00000114197 | -2,38E+00 | -3,033621663 | 2,20E+00 | 1,38E-01 | 4,68E-01 | AC154634.1 | 0,19 | No  |
| ENSMUSG00000114200 | 1,82E+00  | -3,033667329 | 1,31E+00 | 2,52E-01 | 5,50E-01 | AC155298.1 | 3,54 | No  |
| ENSMUSG00000114202 | -3,17E-01 | 0,095849611  | 1,25E+00 | 2,63E-01 | 5,58E-01 | AC129975.1 | 0,80 | No  |
| ENSMUSG00000114203 | -4,88E-02 | -2,355611762 | 2,23E-03 | 9,62E-01 | 1,00E+00 | AC154849.1 | 0,97 | No  |
| ENSMUSG00000114205 | -1,86E+00 | -2,896095589 | 1,41E+00 | 2,36E-01 | 5,50E-01 | AC129590.1 | 0,27 | No  |
| ENSMUSG00000114210 | -3,36E-01 | 0,08337533   | 1,35E+00 | 2,45E-01 | 5,50E-01 | AC131709.1 | 0,79 | No  |
| ENSMUSG00000114213 | 1,85E+00  | -3,107657832 | 1,35E+00 | 2,46E-01 | 5,50E-01 | AC126549.1 | 3,61 | No  |
| ENSMUSG00000114214 | 1,81E+00  | -3,10765737  | 1,28E+00 | 2,58E-01 | 5,50E-01 | AC174797.1 | 3,49 | No  |
| ENSMUSG00000114217 | 4,32E-02  | 3,069607531  | 1,53E-01 | 6,95E-01 | 9,02E-01 | AC156803.1 | 1,03 | No  |
| ENSMUSG00000114220 | 1,23E-02  | 1,921821272  | 6,38E-03 | 9,36E-01 | 1,00E+00 | AC129217.1 | 1,01 | No  |
| ENSMUSG00000114224 | -1,34E+00 | -2,711730685 | 1,12E+00 | 2,90E-01 | 5,85E-01 | AC118006.1 | 0,40 | No  |
| ENSMUSG00000114228 | -8,21E-01 | -2,963266074 | 3,67E-01 | 5,45E-01 | 8,13E-01 | AL589735.1 | 0,57 | No  |
| ENSMUSG00000114229 | 1,85E+00  | -3,107657832 | 1,35E+00 | 2,46E-01 | 5,50E-01 | AC164426.1 | 3,61 | No  |
| ENSMUSG00000114230 | -3,71E-01 | -2,033720832 | 3,18E-01 | 5,73E-01 | 8,32E-01 | AC156025.1 | 0,77 | No  |
| ENSMUSG00000114231 | -1,22E+00 | -3,146113954 | 6,96E-01 | 4,04E-01 | 7,01E-01 | AC159195.2 | 0,43 | No  |
| ENSMUSG00000114232 | 6,75E-02  | -2,750904231 | 2,96E-03 | 9,57E-01 | 1,00E+00 | AC157650.1 | 1,05 | No  |
| ENSMUSG00000114233 | 1,85E+00  | -3,107657832 | 1,35E+00 | 2,46E-01 | 5,50E-01 | AC163631.2 | 3,61 | No  |
| ENSMUSG00000114234 | -3,73E-01 | -0,083892537 | 1,40E+00 | 2,37E-01 | 5,50E-01 | AC154222.1 | 0,77 | No  |
| ENSMUSG00000114235 | -5,47E-01 | 0,112175266  | 4,00E+00 | 4,56E-02 | 2,55E-01 | AC117769.1 | 0,68 | No  |
| ENSMUSG00000114241 | -8,57E-02 | -1,401439276 | 2,92E-02 | 8,64E-01 | 9,98E-01 | AC121599.1 | 0,94 | No  |
| ENSMUSG00000114242 | -1,94E+00 | -2,998007141 | 1,48E+00 | 2,24E-01 | 5,50E-01 | AC154355.1 | 0,26 | No  |
| ENSMUSG00000114243 | -4,14E+00 | -2,655077002 | 8,72E+00 | 3,14E-03 | 3,97E-02 | AC154452.1 | 0,06 | Yes |
| ENSMUSG00000114247 | 1,87E+00  | -3,107639691 | 1,38E+00 | 2,40E-01 | 5,50E-01 | AC167669.2 | 3,67 | No  |
| ENSMUSG00000114248 | 7,73E-02  | -1,863809141 | 1,46E-02 | 9,04E-01 | 1,00E+00 | CT030195.2 | 1,06 | No  |
| ENSMUSG00000114249 | 2,63E+00  | -2,963275836 | 2,67E+00 | 1,02E-01 | 3,94E-01 | AC154595.1 | 6,19 | No  |
| ENSMUSG00000114251 | 1,30E-01  | 6,390244557  | 4,21E+00 | 4,02E-02 | 2,38E-01 | AC134860.1 | 1,09 | No  |
| ENSMUSG00000114252 | -2,48E-01 | 0,814475087  | 1,26E+00 | 2,61E-01 | 5,55E-01 | AC165146.1 | 0,84 | No  |
| ENSMUSG00000114253 | 3,73E-02  | 2,717225984  | 9,63E-02 | 7,56E-01 | 9,35E-01 | AC173482.1 | 1,03 | No  |

|                    |           |              |           |          |          |            |       |    |
|--------------------|-----------|--------------|-----------|----------|----------|------------|-------|----|
| ENSMUSG00000114254 | 8,48E-02  | 4,051959888  | 9,35E-01  | 3,33E-01 | 6,34E-01 | CU074400.1 | 1,06  | No |
| ENSMUSG00000114255 | 1,28E-01  | 1,974685917  | 6,79E-01  | 4,10E-01 | 7,06E-01 | AC175538.1 | 1,09  | No |
| ENSMUSG00000114256 | -1,87E+00 | -3,107637761 | 1,39E+00  | 2,38E-01 | 5,50E-01 | AC122418.1 | 0,27  | No |
| ENSMUSG00000114257 | -3,20E+00 | -2,963227503 | 4,31E+00  | 3,79E-02 | 2,31E-01 | AC158392.1 | 0,11  | No |
| ENSMUSG00000114259 | -1,87E+00 | -3,03364178  | 1,41E+00  | 2,36E-01 | 5,50E-01 | CT009713.1 | 0,27  | No |
| ENSMUSG00000114260 | -1,90E+00 | -3,033647263 | 1,44E+00  | 2,30E-01 | 5,50E-01 | AC090659.1 | 0,27  | No |
| ENSMUSG00000114264 | 1,55E-01  | -0,522700062 | 2,03E-01  | 6,52E-01 | 8,77E-01 | CT030194.1 | 1,11  | No |
| ENSMUSG00000114269 | -2,67E+00 | -2,99799084  | 2,84E+00  | 9,21E-02 | 3,82E-01 | AC139580.1 | 0,16  | No |
| ENSMUSG00000114270 | -3,16E-01 | -1,863749668 | 2,26E-01  | 6,35E-01 | 8,67E-01 | AC134860.2 | 0,80  | No |
| ENSMUSG00000114275 | 9,01E-03  | -3,107646452 | -5,16E-10 | 1,00E+00 | 1,00E+00 | CT010480.1 | 1,01  | No |
| ENSMUSG00000114276 | 1,81E+00  | -3,10765737  | 1,28E+00  | 2,58E-01 | 5,50E-01 | CT009728.1 | 3,49  | No |
| ENSMUSG00000114277 | -1,48E-01 | 4,987603964  | 4,04E+00  | 4,45E-02 | 2,51E-01 | AC154176.1 | 0,90  | No |
| ENSMUSG00000114278 | 1,08E+00  | -1,424922182 | 3,14E+00  | 7,64E-02 | 3,52E-01 | AC157931.1 | 2,11  | No |
| ENSMUSG00000114279 | 2,68E-01  | -1,25757539  | 2,92E-01  | 5,89E-01 | 8,41E-01 | Hist1h2bm  | 1,20  | No |
| ENSMUSG00000114280 | -1,52E+00 | -2,655086997 | 2,40E+00  | 1,22E-01 | 4,35E-01 | CU062626.1 | 0,35  | No |
| ENSMUSG00000114283 | -2,63E-02 | -3,033653157 | 2,33E-04  | 9,88E-01 | 1,00E+00 | AC127583.1 | 0,98  | No |
| ENSMUSG00000114284 | -3,88E-03 | -3,03362684  | 4,02E-12  | 1,00E+00 | 1,00E+00 | AC166997.1 | 1,00  | No |
| ENSMUSG00000114285 | -1,73E+00 | -2,600706188 | 2,09E+00  | 1,49E-01 | 4,89E-01 | AC117769.2 | 0,30  | No |
| ENSMUSG00000114293 | 2,10E-01  | 2,715179827  | 2,89E+00  | 8,93E-02 | 3,79E-01 | AC154788.1 | 1,16  | No |
| ENSMUSG00000114295 | -2,55E-01 | -0,497616607 | 4,84E-01  | 4,87E-01 | 7,74E-01 | AC168881.1 | 0,84  | No |
| ENSMUSG00000114299 | -1,89E+00 | -3,1076441   | 1,42E+00  | 2,33E-01 | 5,50E-01 | AC138214.1 | 0,27  | No |
| ENSMUSG00000114302 | -3,16E+00 | -2,963246013 | 4,20E+00  | 4,04E-02 | 2,38E-01 | AC117797.1 | 0,11  | No |
| ENSMUSG00000114307 | -2,87E-01 | -2,522674956 | 6,99E-02  | 7,91E-01 | 9,55E-01 | CT010480.2 | 0,82  | No |
| ENSMUSG00000114309 | 3,68E+00  | -2,711730471 | 6,06E+00  | 1,38E-02 | 1,19E-01 | AC163038.1 | 12,80 | No |
| ENSMUSG00000114315 | 2,59E+00  | -2,929348236 | 2,60E+00  | 1,07E-01 | 4,00E-01 | AC117797.2 | 6,01  | No |
| ENSMUSG00000114316 | 6,95E-01  | -1,473011863 | 1,90E+00  | 1,69E-01 | 5,23E-01 | AC162936.1 | 1,62  | No |
| ENSMUSG00000114321 | 7,64E-02  | 3,958518311  | 7,30E-01  | 3,93E-01 | 6,93E-01 | CT010506.1 | 1,05  | No |
| ENSMUSG00000114326 | 1,66E-01  | -0,155920281 | 2,77E-01  | 5,98E-01 | 8,45E-01 | AC154297.1 | 1,12  | No |
| ENSMUSG00000114329 | 1,26E+00  | -1,322325377 | 5,46E+00  | 1,95E-02 | 1,49E-01 | AC104200.1 | 2,40  | No |
| ENSMUSG00000114340 | 3,17E+00  | -2,896143025 | 4,09E+00  | 4,31E-02 | 2,47E-01 | AC134860.3 | 8,97  | No |
| ENSMUSG00000114344 | 6,39E-01  | -2,033734854 | 8,30E-01  | 3,62E-01 | 6,64E-01 | AC090654.1 | 1,56  | No |
| ENSMUSG00000114349 | -3,29E-01 | 1,645057033  | 3,91E+00  | 4,81E-02 | 2,64E-01 | AC140462.1 | 0,80  | No |



|                    |           |              |           |          |          |            |      |     |
|--------------------|-----------|--------------|-----------|----------|----------|------------|------|-----|
| ENSMUSG00000114350 | 3,14E-02  | -3,107617333 | -7,69E-10 | 1,00E+00 | 1,00E+00 | AC131745.2 | 1,02 | No  |
| ENSMUSG00000114354 | -9,19E-01 | -2,448591871 | 7,41E-01  | 3,89E-01 | 6,90E-01 | AC125350.2 | 0,53 | No  |
| ENSMUSG00000114355 | -5,76E-01 | -2,655115086 | 2,60E-01  | 6,10E-01 | 8,51E-01 | CT009713.2 | 0,67 | No  |
| ENSMUSG00000114357 | -1,87E+00 | -3,107637761 | 1,39E+00  | 2,38E-01 | 5,50E-01 | AC158983.1 | 0,27 | No  |
| ENSMUSG00000114359 | 1,62E-03  | -2,963242114 | -1,56E-12 | 1,00E+00 | 1,00E+00 | AC160958.1 | 1,00 | No  |
| ENSMUSG00000114362 | 3,63E-02  | 2,627861072  | 8,23E-02  | 7,74E-01 | 9,45E-01 | AC124433.1 | 1,03 | No  |
| ENSMUSG00000114366 | -1,87E+00 | -3,107637761 | 1,39E+00  | 2,38E-01 | 5,50E-01 | AC122242.1 | 0,27 | No  |
| ENSMUSG00000114367 | 3,14E-02  | -3,107617333 | -7,69E-10 | 1,00E+00 | 1,00E+00 | AC157654.1 | 1,02 | No  |
| ENSMUSG00000114369 | 2,84E-02  | -1,472946082 | 2,73E-03  | 9,58E-01 | 1,00E+00 | AC123738.1 | 1,02 | No  |
| ENSMUSG00000114370 | -1,24E+00 | -2,355567074 | 1,47E+00  | 2,25E-01 | 5,50E-01 | AC022682.1 | 0,42 | No  |
| ENSMUSG00000114371 | -3,49E-02 | -2,9632767   | 7,31E-11  | 1,00E+00 | 1,00E+00 | AC124562.1 | 0,98 | No  |
| ENSMUSG00000114372 | -6,76E-02 | -2,896116699 | 2,02E-03  | 9,64E-01 | 1,00E+00 | AC124196.1 | 0,95 | No  |
| ENSMUSG00000114373 | -7,43E-01 | -1,497411724 | 1,44E+00  | 2,29E-01 | 5,50E-01 | AC162940.1 | 0,60 | No  |
| ENSMUSG00000114375 | 1,85E-02  | 3,616035234  | 3,65E-02  | 8,49E-01 | 9,88E-01 | AC238811.1 | 1,01 | No  |
| ENSMUSG00000114376 | -1,07E-01 | -1,175603899 | 5,07E-02  | 8,22E-01 | 9,72E-01 | AC096628.1 | 0,93 | No  |
| ENSMUSG00000114378 | -2,40E-01 | 0,292053473  | 8,63E-01  | 3,53E-01 | 6,54E-01 | AC154682.1 | 0,85 | No  |
| ENSMUSG00000114380 | -4,64E-01 | 5,335970152  | 4,37E+01  | 3,80E-11 | 3,80E-09 | AC154454.1 | 0,72 | Yes |
| ENSMUSG00000114387 | 3,14E-02  | -3,107617333 | -7,69E-10 | 1,00E+00 | 1,00E+00 | AC121942.1 | 1,02 | No  |
| ENSMUSG00000114388 | 1,77E-01  | -2,185670973 | 4,69E-02  | 8,29E-01 | 9,76E-01 | AC158538.2 | 1,13 | No  |
| ENSMUSG00000114393 | -3,94E-01 | -2,929292819 | 9,53E-02  | 7,58E-01 | 9,35E-01 | AC165260.3 | 0,76 | No  |
| ENSMUSG00000114398 | 7,31E-01  | -0,36711249  | 4,24E+00  | 3,95E-02 | 2,36E-01 | AC238940.1 | 1,66 | No  |
| ENSMUSG00000114399 | 7,77E-01  | -1,896212165 | 1,28E+00  | 2,58E-01 | 5,50E-01 | AC154747.2 | 1,71 | No  |
| ENSMUSG00000114400 | 1,85E+00  | -3,107657832 | 1,35E+00  | 2,46E-01 | 5,50E-01 | AC107663.1 | 3,61 | No  |
| ENSMUSG00000114401 | 2,39E+00  | -2,448727154 | 4,86E+00  | 2,75E-02 | 1,87E-01 | CT025642.1 | 5,23 | No  |
| ENSMUSG00000114403 | 8,47E-01  | -2,268100846 | 8,63E-01  | 3,53E-01 | 6,54E-01 | AC090659.2 | 1,80 | No  |
| ENSMUSG00000114404 | -8,21E-01 | -2,448717278 | 9,83E-01  | 3,21E-01 | 6,22E-01 | CT009713.3 | 0,57 | No  |
| ENSMUSG00000114407 | 1,27E+00  | -2,83199681  | 1,01E+00  | 3,16E-01 | 6,16E-01 | AC124562.2 | 2,42 | No  |
| ENSMUSG00000114409 | 1,58E-01  | 3,275510235  | 2,28E+00  | 1,31E-01 | 4,55E-01 | AC117769.3 | 1,12 | No  |
| ENSMUSG00000114412 | -1,25E+00 | -2,44864592  | 1,50E+00  | 2,21E-01 | 5,50E-01 | AC124729.1 | 0,42 | No  |
| ENSMUSG00000114413 | -1,87E+00 | -3,107637761 | 1,39E+00  | 2,38E-01 | 5,50E-01 | AC132881.1 | 0,27 | No  |
| ENSMUSG00000114414 | -1,48E+00 | -2,600687571 | 2,26E+00  | 1,33E-01 | 4,58E-01 | AC154849.2 | 0,36 | No  |
| ENSMUSG00000114418 | 2,01E+00  | -2,740929809 | 3,11E+00  | 7,78E-02 | 3,56E-01 | AC154767.1 | 4,02 | No  |

|                    |           |              |           |          |          |            |      |    |
|--------------------|-----------|--------------|-----------|----------|----------|------------|------|----|
| ENSMUSG00000114419 | -8,46E-02 | 0,040977855  | 8,53E-02  | 7,70E-01 | 9,42E-01 | AC173482.2 | 0,94 | No |
| ENSMUSG00000114420 | -1,84E-02 | -3,033644089 | 8,41E-05  | 9,93E-01 | 1,00E+00 | AC154361.1 | 0,99 | No |
| ENSMUSG00000114421 | 1,87E+00  | -3,107639691 | 1,38E+00  | 2,40E-01 | 5,50E-01 | AC154642.1 | 3,67 | No |
| ENSMUSG00000114424 | 1,04E+00  | -1,472967004 | 3,96E+00  | 4,65E-02 | 2,57E-01 | CT009536.1 | 2,05 | No |
| ENSMUSG00000114428 | 1,85E+00  | -3,107657832 | 1,35E+00  | 2,46E-01 | 5,50E-01 | AC154329.2 | 3,61 | No |
| ENSMUSG00000114429 | 1,27E-01  | 7,347784741  | 4,50E+00  | 3,40E-02 | 2,17E-01 | AC113060.1 | 1,09 | No |
| ENSMUSG00000114430 | 3,16E+00  | -2,963281728 | 4,07E+00  | 4,36E-02 | 2,49E-01 | AC107763.1 | 8,92 | No |
| ENSMUSG00000114432 | 3,26E-01  | 0,706052844  | 1,99E+00  | 1,59E-01 | 5,06E-01 | AC160962.1 | 1,25 | No |
| ENSMUSG00000114433 | -6,78E-01 | -2,998023127 | 1,85E-01  | 6,67E-01 | 8,86E-01 | AC124392.1 | 0,62 | No |
| ENSMUSG00000114436 | 3,22E-01  | 2,504123035  | 6,05E+00  | 1,39E-02 | 1,19E-01 | AC130831.1 | 1,25 | No |
| ENSMUSG00000114438 | -3,92E-01 | 1,263131634  | 4,14E+00  | 4,19E-02 | 2,43E-01 | AC154767.2 | 0,76 | No |
| ENSMUSG00000114440 | -2,71E+00 | -3,033620915 | 2,92E+00  | 8,75E-02 | 3,78E-01 | AC154861.1 | 0,15 | No |
| ENSMUSG00000114442 | 2,62E+00  | -2,963293967 | 2,65E+00  | 1,04E-01 | 3,95E-01 | AC159264.1 | 6,13 | No |
| ENSMUSG00000114443 | -2,35E-01 | 0,610472791  | 1,02E+00  | 3,14E-01 | 6,14E-01 | AC125019.1 | 0,85 | No |
| ENSMUSG00000114446 | 2,38E-01  | -2,033717569 | 1,32E-01  | 7,17E-01 | 9,13E-01 | AC123867.1 | 1,18 | No |
| ENSMUSG00000114447 | 9,32E-02  | 2,481801559  | 5,24E-01  | 4,69E-01 | 7,57E-01 | AC156559.1 | 1,07 | No |
| ENSMUSG00000114456 | 1,13E-01  | 1,258941217  | 3,29E-01  | 5,66E-01 | 8,28E-01 | Hist1h2bh  | 1,08 | No |
| ENSMUSG00000114458 | -8,22E-01 | -2,033547579 | 9,85E-01  | 3,21E-01 | 6,21E-01 | AC129085.1 | 0,57 | No |
| ENSMUSG00000114462 | -1,76E+00 | -2,770555129 | 2,17E+00  | 1,41E-01 | 4,74E-01 | CT573085.2 | 0,29 | No |
| ENSMUSG00000114463 | 1,17E+00  | -3,14612376  | 6,40E-01  | 4,24E-01 | 7,18E-01 | AC154471.1 | 2,26 | No |
| ENSMUSG00000114470 | 1,32E-01  | 3,414688821  | 1,67E+00  | 1,97E-01 | 5,50E-01 | AC175538.2 | 1,10 | No |
| ENSMUSG00000114472 | 1,12E+00  | -2,165804375 | 2,07E+00  | 1,50E-01 | 4,91E-01 | CT010480.4 | 2,17 | No |
| ENSMUSG00000114476 | 3,27E-01  | -1,740830857 | 2,84E-01  | 5,94E-01 | 8,43E-01 | AC158392.2 | 1,25 | No |
| ENSMUSG00000114477 | -1,35E+00 | -2,548210319 | 1,14E+00  | 2,86E-01 | 5,82E-01 | AC165265.1 | 0,39 | No |
| ENSMUSG00000114479 | -1,23E+00 | -3,107645276 | 7,12E-01  | 3,99E-01 | 6,98E-01 | CT009711.1 | 0,43 | No |
| ENSMUSG00000114481 | -4,52E-01 | -2,49758783  | 2,09E-01  | 6,48E-01 | 8,75E-01 | AC123709.1 | 0,73 | No |
| ENSMUSG00000114482 | 3,26E-01  | 1,074756941  | 2,46E+00  | 1,17E-01 | 4,23E-01 | CT485787.1 | 1,25 | No |
| ENSMUSG00000114483 | 1,87E+00  | -3,107639691 | 1,38E+00  | 2,40E-01 | 5,50E-01 | AC168059.1 | 3,67 | No |
| ENSMUSG00000114487 | -5,24E-01 | -2,711718089 | 2,37E-01  | 6,26E-01 | 8,60E-01 | CT010498.1 | 0,70 | No |
| ENSMUSG00000114490 | 4,24E-02  | -3,033592245 | -1,17E-09 | 1,00E+00 | 1,00E+00 | AC125350.3 | 1,03 | No |
| ENSMUSG00000114493 | 1,59E-02  | 4,803240771  | 4,36E-02  | 8,35E-01 | 9,80E-01 | AC164426.2 | 1,01 | No |
| ENSMUSG00000114496 | -7,56E-01 | -2,54816451  | 6,41E-01  | 4,23E-01 | 7,18E-01 | AC161884.1 | 0,59 | No |

|                    |           |              |           |          |          |            |  |      |     |
|--------------------|-----------|--------------|-----------|----------|----------|------------|--|------|-----|
| ENSMUSG00000114498 | 1,87E+00  | -3,107639691 | 1,38E+00  | 2,40E-01 | 5,50E-01 | AC126275.1 |  | 3,67 | No  |
| ENSMUSG00000114500 | -2,83E-01 | 5,343013905  | 1,64E+01  | 5,12E-05 | 1,38E-03 | AC154361.2 |  | 0,82 | Yes |
| ENSMUSG00000114501 | -1,54E+00 | -1,333105455 | 7,17E+00  | 7,42E-03 | 7,49E-02 | AC154176.2 |  | 0,34 | No  |
| ENSMUSG00000114504 | -1,94E+00 | -3,107619243 | 1,50E+00  | 2,21E-01 | 5,50E-01 | AC154681.1 |  | 0,26 | No  |
| ENSMUSG00000114506 | -2,66E+00 | -3,033639428 | 2,81E+00  | 9,35E-02 | 3,83E-01 | AL672194.1 |  | 0,16 | No  |
| ENSMUSG00000114507 | -1,94E+00 | -3,107619243 | 1,50E+00  | 2,21E-01 | 5,50E-01 | AC161252.1 |  | 0,26 | No  |
| ENSMUSG00000114508 | -1,87E+00 | -3,107637761 | 1,39E+00  | 2,38E-01 | 5,50E-01 | AC154595.3 |  | 0,27 | No  |
| ENSMUSG00000114515 | -4,62E-03 | -1,473017128 | 7,55E-05  | 9,93E-01 | 1,00E+00 | Aldoa      |  | 1,00 | No  |
| ENSMUSG00000114516 | -2,85E-01 | -2,205917643 | 1,41E-01  | 7,07E-01 | 9,08E-01 | AC187103.1 |  | 0,82 | No  |
| ENSMUSG00000114519 | -3,83E-02 | -3,107651936 | -7,91E-11 | 1,00E+00 | 1,00E+00 | AC161252.2 |  | 0,97 | No  |
| ENSMUSG00000114524 | 3,91E-01  | -0,401605245 | 1,21E+00  | 2,72E-01 | 5,68E-01 | AC163038.2 |  | 1,31 | No  |
| ENSMUSG00000114526 | 1,85E+00  | -3,107657832 | 1,35E+00  | 2,46E-01 | 5,50E-01 | AC135469.1 |  | 3,61 | No  |
| ENSMUSG00000114529 | 9,46E-02  | 5,132736315  | 1,72E+00  | 1,90E-01 | 5,50E-01 | AC190403.1 |  | 1,07 | No  |
| ENSMUSG00000114531 | -1,01E-01 | -2,070242578 | 2,12E-02  | 8,84E-01 | 1,00E+00 | AC122346.1 |  | 0,93 | No  |
| ENSMUSG00000114533 | 3,06E-01  | 2,378647957  | 5,10E+00  | 2,39E-02 | 1,69E-01 | CT030653.1 |  | 1,24 | No  |
| ENSMUSG00000114535 | 2,23E-01  | -0,015529261 | 5,32E-01  | 4,66E-01 | 7,54E-01 | AC134869.1 |  | 1,17 | No  |
| ENSMUSG00000114536 | -4,90E-01 | 1,808551012  | 9,92E+00  | 1,63E-03 | 2,38E-02 | AC154639.1 |  | 0,71 | Yes |
| ENSMUSG00000114537 | 3,77E-01  | -1,033707978 | 6,88E-01  | 4,07E-01 | 7,03E-01 | CT025639.1 |  | 1,30 | No  |
| ENSMUSG00000114538 | -1,24E+00 | -3,107644849 | 7,21E-01  | 3,96E-01 | 6,96E-01 | AC117608.1 |  | 0,42 | No  |
| ENSMUSG00000114539 | -5,50E-01 | -1,770631187 | 9,08E-01  | 3,41E-01 | 6,41E-01 | AC157650.2 |  | 0,68 | No  |
| ENSMUSG00000114540 | -2,13E-02 | 6,593672412  | 1,16E-01  | 7,33E-01 | 9,23E-01 | AC123935.1 |  | 0,99 | No  |
| ENSMUSG00000114541 | -1,87E+00 | -3,107637761 | 1,39E+00  | 2,38E-01 | 5,50E-01 | AC155234.1 |  | 0,27 | No  |
| ENSMUSG00000114545 | 8,98E-01  | -1,497632482 | 2,58E+00  | 1,08E-01 | 4,02E-01 | AC154848.1 |  | 1,86 | No  |
| ENSMUSG00000114547 | 7,82E-02  | 6,849788558  | 1,63E+00  | 2,02E-01 | 5,50E-01 | AC154767.3 |  | 1,06 | No  |
| ENSMUSG00000114548 | -4,07E-02 | -2,655117421 | 1,17E-03  | 9,73E-01 | 1,00E+00 | AC118006.3 |  | 0,97 | No  |
| ENSMUSG00000114551 | 5,92E-03  | 4,930302355  | 6,35E-03  | 9,36E-01 | 1,00E+00 | CT025555.1 |  | 1,00 | No  |
| ENSMUSG00000114552 | -1,83E-01 | -2,38606501  | 3,97E-02  | 8,42E-01 | 9,85E-01 | AC167669.3 |  | 0,88 | No  |
| ENSMUSG00000114553 | -1,31E-01 | -0,200666601 | 1,59E-01  | 6,90E-01 | 8,99E-01 | AC154646.1 |  | 0,91 | No  |
| ENSMUSG00000114554 | -7,83E-01 | -1,800872651 | 1,81E+00  | 1,79E-01 | 5,39E-01 | CT009711.2 |  | 0,58 | No  |
| ENSMUSG00000114555 | -1,27E-01 | -0,683164706 | 9,68E-02  | 7,56E-01 | 9,34E-01 | AC141476.1 |  | 0,92 | No  |
| ENSMUSG00000114557 | 2,62E-01  | 2,215719001  | 3,41E+00  | 6,47E-02 | 3,19E-01 | AC154220.1 |  | 1,20 | No  |
| ENSMUSG00000114558 | -7,59E-02 | 2,747971387  | 3,91E-01  | 5,32E-01 | 8,06E-01 | AC165148.1 |  | 0,95 | No  |

|                    |           |              |           |          |          |            |  |      |     |
|--------------------|-----------|--------------|-----------|----------|----------|------------|--|------|-----|
| ENSMUSG00000114559 | 1,81E+00  | -2,963282131 | 1,30E+00  | 2,54E-01 | 5,50E-01 | AC165366.1 |  | 3,50 | No  |
| ENSMUSG00000114568 | -4,17E-02 | -2,26811321  | 2,78E-03  | 9,58E-01 | 1,00E+00 | AC187103.2 |  | 0,97 | No  |
| ENSMUSG00000114572 | 9,01E-03  | -3,107646452 | -5,16E-10 | 1,00E+00 | 1,00E+00 | AC154328.1 |  | 1,01 | No  |
| ENSMUSG00000114575 | 7,03E-01  | -1,117113528 | 2,23E+00  | 1,35E-01 | 4,63E-01 | AC154573.2 |  | 1,63 | No  |
| ENSMUSG00000114576 | 3,61E-01  | 1,375256204  | 4,19E+00  | 4,07E-02 | 2,39E-01 | CT009518.2 |  | 1,28 | No  |
| ENSMUSG00000114579 | -1,92E-02 | 5,107263333  | 6,92E-02  | 7,92E-01 | 9,55E-01 | AC160980.1 |  | 0,99 | No  |
| ENSMUSG00000114581 | -1,89E+00 | -3,1076441   | 1,42E+00  | 2,33E-01 | 5,50E-01 | AC121942.2 |  | 0,27 | No  |
| ENSMUSG00000114584 | 3,19E-01  | 2,319967383  | 5,48E+00  | 1,92E-02 | 1,47E-01 | AC131687.1 |  | 1,25 | No  |
| ENSMUSG00000114585 | 3,02E-01  | 0,623582555  | 1,58E+00  | 2,08E-01 | 5,50E-01 | CT025639.2 |  | 1,23 | No  |
| ENSMUSG00000114588 | 1,85E+00  | -3,107657832 | 1,35E+00  | 2,46E-01 | 5,50E-01 | AC154572.1 |  | 3,61 | No  |
| ENSMUSG00000114592 | -7,72E-01 | -2,401354844 | 6,68E-01  | 4,14E-01 | 7,09E-01 | CT025603.2 |  | 0,59 | No  |
| ENSMUSG00000114593 | 1,17E+00  | -3,14612376  | 6,40E-01  | 4,24E-01 | 7,18E-01 | AC123534.1 |  | 2,26 | No  |
| ENSMUSG00000114598 | -9,41E-01 | 0,337972068  | 1,09E+01  | 9,49E-04 | 1,55E-02 | AC129085.2 |  | 0,52 | Yes |
| ENSMUSG00000114601 | -4,55E-02 | -2,770580715 | 1,40E-03  | 9,70E-01 | 1,00E+00 | AC159205.4 |  | 0,97 | No  |
| ENSMUSG00000114602 | -7,13E-02 | 0,638830057  | 8,55E-02  | 7,70E-01 | 9,42E-01 | AC154335.1 |  | 0,95 | No  |
| ENSMUSG00000114603 | -1,01E+00 | -2,448725075 | 1,25E+00  | 2,64E-01 | 5,59E-01 | AC187103.3 |  | 0,50 | No  |
| ENSMUSG00000114604 | -1,94E+00 | -3,107619243 | 1,50E+00  | 2,21E-01 | 5,50E-01 | AC132901.1 |  | 0,26 | No  |
| ENSMUSG00000114605 | -6,36E-01 | -1,863668623 | 1,02E+00  | 3,12E-01 | 6,12E-01 | AC154548.1 |  | 0,64 | No  |
| ENSMUSG00000114607 | -3,93E-01 | 5,255740059  | 3,10E+01  | 2,60E-08 | 1,65E-06 | AC161252.3 |  | 0,76 | Yes |
| ENSMUSG00000114608 | -7,07E-02 | 4,646835214  | 8,18E-01  | 3,66E-01 | 6,67E-01 | AC238811.2 |  | 0,95 | No  |
| ENSMUSG00000114610 | -1,91E+00 | -2,963268868 | 1,45E+00  | 2,29E-01 | 5,50E-01 | AC100729.1 |  | 0,27 | No  |
| ENSMUSG00000114612 | 6,33E-02  | 2,497883522  | 2,39E-01  | 6,25E-01 | 8,59E-01 | AC129085.3 |  | 1,04 | No  |
| ENSMUSG00000114613 | -1,94E+00 | -3,107619243 | 1,50E+00  | 2,21E-01 | 5,50E-01 | AC159188.2 |  | 0,26 | No  |
| ENSMUSG00000114617 | 5,73E-01  | -1,963359975 | 5,56E-01  | 4,56E-01 | 7,45E-01 | AC140397.1 |  | 1,49 | No  |
| ENSMUSG00000114618 | 6,07E-01  | -2,497595556 | 4,11E-01  | 5,22E-01 | 8,00E-01 | AC120425.1 |  | 1,52 | No  |
| ENSMUSG00000114621 | 2,65E+00  | -3,033655087 | 2,73E+00  | 9,86E-02 | 3,91E-01 | AC154687.2 |  | 6,30 | No  |
| ENSMUSG00000114622 | 1,06E-01  | 3,503691862  | 1,12E+00  | 2,91E-01 | 5,86E-01 | CT025642.2 |  | 1,08 | No  |
| ENSMUSG00000114623 | 1,17E+00  | -3,14612376  | 6,40E-01  | 4,24E-01 | 7,18E-01 | AC155298.2 |  | 2,26 | No  |
| ENSMUSG00000114624 | 9,01E-03  | -3,107646452 | -5,16E-10 | 1,00E+00 | 1,00E+00 | AC156025.2 |  | 1,01 | No  |
| ENSMUSG00000114627 | 4,26E-01  | -1,424819087 | 6,27E-01  | 4,29E-01 | 7,22E-01 | CT025566.1 |  | 1,34 | No  |
| ENSMUSG00000114628 | -7,76E-02 | -2,963273445 | 2,73E-03  | 9,58E-01 | 1,00E+00 | CT025538.2 |  | 0,95 | No  |
| ENSMUSG00000114633 | 2,36E-02  | 1,235334589  | 1,46E-02  | 9,04E-01 | 1,00E+00 | AC126408.1 |  | 1,02 | No  |

|                    |           |              |           |          |          |            |      |     |
|--------------------|-----------|--------------|-----------|----------|----------|------------|------|-----|
| ENSMUSG00000114635 | 2,02E-01  | -0,733648307 | 2,54E-01  | 6,14E-01 | 8,53E-01 | CT010498.2 | 1,15 | No  |
| ENSMUSG00000114636 | -3,83E-02 | -3,107651936 | -7,91E-11 | 1,00E+00 | 1,00E+00 | AC154527.4 | 0,97 | No  |
| ENSMUSG00000114638 | 1,85E-01  | 2,039696274  | 1,55E+00  | 2,13E-01 | 5,50E-01 | AC154747.3 | 1,14 | No  |
| ENSMUSG00000114642 | -2,93E-01 | 0,01975452   | 1,02E+00  | 3,11E-01 | 6,11E-01 | AC154435.1 | 0,82 | No  |
| ENSMUSG00000114644 | -2,92E-03 | -3,107634635 | 4,90E-12  | 1,00E+00 | 1,00E+00 | AC151730.2 | 1,00 | No  |
| ENSMUSG00000114647 | 1,85E+00  | -3,107657832 | 1,35E+00  | 2,46E-01 | 5,50E-01 | AC134860.4 | 3,61 | No  |
| ENSMUSG00000114649 | -1,27E+00 | -2,600676447 | 1,54E+00  | 2,14E-01 | 5,50E-01 | CT025642.3 | 0,42 | No  |
| ENSMUSG00000114655 | -1,94E+00 | -3,107619243 | 1,50E+00  | 2,21E-01 | 5,50E-01 | AC154862.1 | 0,26 | No  |
| ENSMUSG00000114656 | -8,56E-01 | -2,832011372 | 4,01E-01  | 5,26E-01 | 8,03E-01 | AC159196.2 | 0,55 | No  |
| ENSMUSG00000114662 | -1,50E-01 | 0,755574849  | 4,37E-01  | 5,08E-01 | 7,92E-01 | AC159205.6 | 0,90 | No  |
| ENSMUSG00000114664 | -5,93E-01 | -1,655119928 | 9,72E-01  | 3,24E-01 | 6,25E-01 | CT010470.1 | 0,66 | No  |
| ENSMUSG00000114665 | 3,97E-01  | -1,62768752  | 4,71E-01  | 4,93E-01 | 7,78E-01 | CT009713.5 | 1,32 | No  |
| ENSMUSG00000114672 | -1,71E+00 | -2,71173379  | 2,03E+00  | 1,55E-01 | 4,98E-01 | AC159205.7 | 0,31 | No  |
| ENSMUSG00000114676 | 1,81E+00  | -3,10765737  | 1,28E+00  | 2,58E-01 | 5,50E-01 | CT025538.3 | 3,49 | No  |
| ENSMUSG00000114677 | 3,15E+00  | -2,832016821 | 4,04E+00  | 4,44E-02 | 2,51E-01 | AC187103.4 | 8,86 | No  |
| ENSMUSG00000114681 | -3,95E-02 | -2,770627166 | 1,06E-03  | 9,74E-01 | 1,00E+00 | AC154171.1 | 0,97 | No  |
| ENSMUSG00000114683 | -2,27E+00 | -2,448638526 | 4,21E+00  | 4,03E-02 | 2,38E-01 | AC117656.1 | 0,21 | No  |
| ENSMUSG00000114687 | 1,30E-01  | 6,627107789  | 4,36E+00  | 3,68E-02 | 2,28E-01 | AC154572.2 | 1,09 | No  |
| ENSMUSG00000114688 | -3,51E-01 | 4,050508746  | 1,60E+01  | 6,45E-05 | 1,68E-03 | AC160980.2 | 0,78 | Yes |
| ENSMUSG00000114689 | 4,53E-02  | 0,128578171  | 2,32E-02  | 8,79E-01 | 1,00E+00 | AC129085.4 | 1,03 | No  |
| ENSMUSG00000114696 | -8,32E-01 | -2,896113506 | 3,80E-01  | 5,38E-01 | 8,09E-01 | AC126549.2 | 0,56 | No  |
| ENSMUSG00000114698 | -1,87E+00 | -3,107637761 | 1,39E+00  | 2,38E-01 | 5,50E-01 | AC173482.4 | 0,27 | No  |
| ENSMUSG00000114702 | -7,01E-01 | -2,998016982 | 1,97E-01  | 6,57E-01 | 8,80E-01 | AL589742.1 | 0,62 | No  |
| ENSMUSG00000114705 | 1,87E+00  | -3,107639691 | 1,38E+00  | 2,40E-01 | 5,50E-01 | CT009536.2 | 3,67 | No  |
| ENSMUSG00000114707 | -3,16E-01 | -2,107570673 | 1,50E-01  | 6,99E-01 | 9,04E-01 | CT010486.2 | 0,80 | No  |
| ENSMUSG00000114708 | 1,87E+00  | -3,107639691 | 1,38E+00  | 2,40E-01 | 5,50E-01 | AC156802.1 | 3,67 | No  |
| ENSMUSG00000114709 | -1,26E-01 | 0,374388412  | 2,42E-01  | 6,23E-01 | 8,58E-01 | AC157650.3 | 0,92 | No  |
| ENSMUSG00000114711 | 3,14E-02  | -3,107617333 | -7,69E-10 | 1,00E+00 | 1,00E+00 | AC117656.2 | 1,02 | No  |
| ENSMUSG00000114712 | -1,94E+00 | -3,107619243 | 1,50E+00  | 2,21E-01 | 5,50E-01 | CT010486.3 | 0,26 | No  |
| ENSMUSG00000114714 | -1,34E+00 | -2,711689423 | 1,12E+00  | 2,89E-01 | 5,85E-01 | AC140397.2 | 0,40 | No  |
| ENSMUSG00000114715 | 2,62E+00  | -3,033654625 | 2,66E+00  | 1,03E-01 | 3,95E-01 | AC168056.3 | 6,16 | No  |
| ENSMUSG00000114718 | -2,90E-01 | -1,896134711 | 2,55E-01  | 6,14E-01 | 8,53E-01 | CT009713.6 | 0,82 | No  |

|                    |           |              |           |          |          |            |      |    |
|--------------------|-----------|--------------|-----------|----------|----------|------------|------|----|
| ENSMUSG00000114719 | 1,23E+00  | -2,83206083  | 9,29E-01  | 3,35E-01 | 6,36E-01 | AC129085.5 | 2,34 | No |
| ENSMUSG00000114722 | -5,23E-02 | -2,963267963 | 1,24E-03  | 9,72E-01 | 1,00E+00 | CT025624.1 | 0,96 | No |
| ENSMUSG00000114723 | 1,00E+00  | -0,946313511 | 5,04E+00  | 2,47E-02 | 1,74E-01 | AC133496.1 | 2,00 | No |
| ENSMUSG00000114726 | -4,46E-02 | -0,47286832  | 1,63E-02  | 8,98E-01 | 1,00E+00 | AC164116.1 | 0,97 | No |
| ENSMUSG00000114728 | -2,72E+00 | -2,831982723 | 2,92E+00  | 8,75E-02 | 3,78E-01 | AC154840.1 | 0,15 | No |
| ENSMUSG00000114733 | -1,20E+00 | -1,088681004 | 6,93E+00  | 8,50E-03 | 8,28E-02 | AC131187.2 | 0,43 | No |
| ENSMUSG00000114737 | 2,67E+00  | -2,963223118 | 2,76E+00  | 9,68E-02 | 3,88E-01 | AC158392.3 | 6,39 | No |
| ENSMUSG00000114738 | -2,12E-01 | 3,102917575  | 3,74E+00  | 5,32E-02 | 2,81E-01 | AC153153.1 | 0,86 | No |
| ENSMUSG00000114739 | 7,41E-01  | -2,963225026 | 3,00E-01  | 5,84E-01 | 8,38E-01 | AC158525.1 | 1,67 | No |
| ENSMUSG00000114743 | -1,94E+00 | -3,107619243 | 1,50E+00  | 2,21E-01 | 5,50E-01 | AC165260.5 | 0,26 | No |
| ENSMUSG00000114746 | -1,94E+00 | -3,107619243 | 1,50E+00  | 2,21E-01 | 5,50E-01 | AC121942.3 | 0,26 | No |
| ENSMUSG00000114748 | 1,85E+00  | -3,107657832 | 1,35E+00  | 2,46E-01 | 5,50E-01 | CT025689.4 | 3,61 | No |
| ENSMUSG00000114755 | 4,99E-01  | -2,896155046 | 1,62E-01  | 6,88E-01 | 8,98E-01 | Galr3      | 1,41 | No |
| ENSMUSG00000114756 | -5,54E-01 | -2,655102891 | 2,41E-01  | 6,23E-01 | 8,58E-01 | AC117949.1 | 0,68 | No |
| ENSMUSG00000114757 | 3,14E-02  | -3,107617333 | -7,69E-10 | 1,00E+00 | 1,00E+00 | AC124686.1 | 1,02 | No |
| ENSMUSG00000114759 | -6,98E-02 | 5,455042591  | 1,01E+00  | 3,16E-01 | 6,16E-01 | AC153153.2 | 0,95 | No |
| ENSMUSG00000114761 | -8,23E-01 | -2,831972082 | 3,72E-01  | 5,42E-01 | 8,12E-01 | AC151730.3 | 0,57 | No |
| ENSMUSG00000114763 | 1,43E-02  | 2,060553813  | 9,35E-03  | 9,23E-01 | 1,00E+00 | AC134869.3 | 1,01 | No |
| ENSMUSG00000114765 | -8,01E-02 | 4,777773098  | 1,09E+00  | 2,97E-01 | 5,93E-01 | AC158388.2 | 0,95 | No |
| ENSMUSG00000114766 | 5,27E-03  | 1,722049719  | 9,99E-04  | 9,75E-01 | 1,00E+00 | AC154724.1 | 1,00 | No |
| ENSMUSG00000114767 | -1,87E+00 | -3,107637761 | 1,39E+00  | 2,38E-01 | 5,50E-01 | AC125223.2 | 0,27 | No |
| ENSMUSG00000114771 | -6,31E-01 | -1,963272517 | 7,75E-01  | 3,79E-01 | 6,79E-01 | AC163667.1 | 0,65 | No |
| ENSMUSG00000114775 | 1,85E+00  | -3,107657832 | 1,35E+00  | 2,46E-01 | 5,50E-01 | AC123629.1 | 3,61 | No |
| ENSMUSG00000114784 | 2,32E-01  | 0,402313197  | 8,33E-01  | 3,61E-01 | 6,63E-01 | CT009713.9 | 1,17 | No |
| ENSMUSG00000114785 | 2,31E-01  | -1,963164637 | 1,24E-01  | 7,25E-01 | 9,18E-01 | AC124603.1 | 1,17 | No |
| ENSMUSG00000114787 | 1,19E+00  | -3,070179505 | 6,63E-01  | 4,15E-01 | 7,11E-01 | AC155298.3 | 2,28 | No |
| ENSMUSG00000114788 | 2,89E-01  | -0,594212834 | 6,37E-01  | 4,25E-01 | 7,19E-01 | AC154510.1 | 1,22 | No |
| ENSMUSG00000114790 | 9,01E-03  | -3,107646452 | -5,16E-10 | 1,00E+00 | 1,00E+00 | AC168056.4 | 1,01 | No |
| ENSMUSG00000114791 | -3,83E-02 | -3,107651936 | -7,91E-11 | 1,00E+00 | 1,00E+00 | CT030182.4 | 0,97 | No |
| ENSMUSG00000114792 | 2,57E+00  | -3,0336723   | 2,56E+00  | 1,10E-01 | 4,06E-01 | AC154184.1 | 5,96 | No |
| ENSMUSG00000114794 | -1,42E-01 | 2,010969045  | 9,19E-01  | 3,38E-01 | 6,38E-01 | AC158388.3 | 0,91 | No |
| ENSMUSG00000114796 | 1,85E+00  | -3,107657832 | 1,35E+00  | 2,46E-01 | 5,50E-01 | AC144949.1 | 3,61 | No |

|                    |           |              |           |          |          |             |  |      |     |
|--------------------|-----------|--------------|-----------|----------|----------|-------------|--|------|-----|
| ENSMUSG00000114797 | 2,27E-01  | 6,507773874  | 1,30E+01  | 3,06E-04 | 6,15E-03 | Nupl1       |  | 1,17 | Yes |
| ENSMUSG00000114798 | -3,66E-01 | -0,070131341 | 1,43E+00  | 2,32E-01 | 5,50E-01 | AC238940.2  |  | 0,78 | No  |
| ENSMUSG00000114800 | -2,63E-02 | -3,033653157 | 2,33E-04  | 9,88E-01 | 1,00E+00 | AC022682.2  |  | 0,98 | No  |
| ENSMUSG00000114804 | 1,86E+00  | -3,033661846 | 1,35E+00  | 2,46E-01 | 5,50E-01 | AC147044.1  |  | 3,62 | No  |
| ENSMUSG00000114805 | 1,56E+00  | -2,522740169 | 2,64E+00  | 1,04E-01 | 3,97E-01 | AC163667.2  |  | 2,94 | No  |
| ENSMUSG00000114808 | -1,22E+00 | -3,146113954 | 6,96E-01  | 4,04E-01 | 7,01E-01 | AC105407.3  |  | 0,43 | No  |
| ENSMUSG00000114809 | 5,68E-03  | 4,847147825  | 5,59E-03  | 9,40E-01 | 1,00E+00 | CT030664.1  |  | 1,00 | No  |
| ENSMUSG00000114811 | -1,94E+00 | -3,107619243 | 1,50E+00  | 2,21E-01 | 5,50E-01 | AL669819.1  |  | 0,26 | No  |
| ENSMUSG00000114812 | -3,83E-01 | -0,401323889 | 1,17E+00  | 2,79E-01 | 5,75E-01 | AC154548.2  |  | 0,77 | No  |
| ENSMUSG00000114817 | -3,87E-02 | -2,832017179 | 9,78E-04  | 9,75E-01 | 1,00E+00 | AL590614.2  |  | 0,97 | No  |
| ENSMUSG00000114820 | -5,65E-02 | -2,896155589 | 2,13E-03  | 9,63E-01 | 1,00E+00 | AC091783.4  |  | 0,96 | No  |
| ENSMUSG00000114822 | -4,31E-01 | -0,946053295 | 1,08E+00  | 3,00E-01 | 5,96E-01 | AC207128.1  |  | 0,74 | No  |
| ENSMUSG00000114823 | 3,14E-02  | -3,107617333 | -7,69E-10 | 1,00E+00 | 1,00E+00 | CT025667.1  |  | 1,02 | No  |
| ENSMUSG00000114824 | 3,14E-02  | -3,107617333 | -7,69E-10 | 1,00E+00 | 1,00E+00 | AC159295.1  |  | 1,02 | No  |
| ENSMUSG00000114826 | -5,84E-01 | -2,770575554 | 2,67E-01  | 6,05E-01 | 8,49E-01 | AC117194.1  |  | 0,67 | No  |
| ENSMUSG00000114827 | 1,11E-01  | 1,237033143  | 3,27E-01  | 5,68E-01 | 8,29E-01 | AC154335.2  |  | 1,08 | No  |
| ENSMUSG00000114828 | -2,51E-01 | -2,033638688 | 1,25E-01  | 7,24E-01 | 9,18E-01 | CT009713.10 |  | 0,84 | No  |
| ENSMUSG00000114829 | -3,49E-01 | -1,863719408 | 3,11E-01  | 5,77E-01 | 8,35E-01 | AC154693.1  |  | 0,79 | No  |
| ENSMUSG00000114830 | -2,47E-01 | -1,08882832  | 2,97E-01  | 5,86E-01 | 8,39E-01 | AC069562.2  |  | 0,84 | No  |
| ENSMUSG00000114832 | 1,89E+00  | -3,033614598 | 1,38E+00  | 2,40E-01 | 5,50E-01 | AC158938.1  |  | 3,70 | No  |
| ENSMUSG00000114834 | -1,89E+00 | -3,1076441   | 1,42E+00  | 2,33E-01 | 5,50E-01 | AC124433.2  |  | 0,27 | No  |
| ENSMUSG00000114835 | 1,63E-01  | 1,107926394  | 6,25E-01  | 4,29E-01 | 7,23E-01 | AC125350.5  |  | 1,12 | No  |
| ENSMUSG00000114842 | -1,33E-01 | -0,963210518 | 9,32E-02  | 7,60E-01 | 9,37E-01 | AC173482.5  |  | 0,91 | No  |
| ENSMUSG00000114851 | -8,97E-01 | -2,548172161 | 7,04E-01  | 4,01E-01 | 6,99E-01 | AC156802.2  |  | 0,54 | No  |
| ENSMUSG00000114853 | 2,66E-01  | -2,574227275 | 8,04E-02  | 7,77E-01 | 9,46E-01 | AC156025.3  |  | 1,20 | No  |
| ENSMUSG00000114854 | -2,73E-01 | -2,800950696 | 6,27E-02  | 8,02E-01 | 9,61E-01 | AC165260.6  |  | 0,83 | No  |
| ENSMUSG00000114857 | 2,64E+00  | -2,896178879 | 2,69E+00  | 1,01E-01 | 3,92E-01 | AC134860.5  |  | 6,24 | No  |
| ENSMUSG00000114858 | 1,66E-01  | 4,189653772  | 3,75E+00  | 5,27E-02 | 2,80E-01 | AC096628.2  |  | 1,12 | No  |
| ENSMUSG00000114859 | -8,94E-01 | -1,800838353 | 2,21E+00  | 1,38E-01 | 4,68E-01 | AC117769.4  |  | 0,54 | No  |
| ENSMUSG00000114860 | 2,06E-02  | -3,146103739 | -9,26E-10 | 1,00E+00 | 1,00E+00 | AC123857.1  |  | 1,01 | No  |
| ENSMUSG00000114861 | 1,87E+00  | -3,107639691 | 1,38E+00  | 2,40E-01 | 5,50E-01 | AC124549.3  |  | 3,67 | No  |
| ENSMUSG00000114862 | 1,03E-02  | 4,18298198   | 1,46E-02  | 9,04E-01 | 1,00E+00 | CU062626.3  |  | 1,01 | No  |

|                    |           |              |           |          |          |            |      |     |
|--------------------|-----------|--------------|-----------|----------|----------|------------|------|-----|
| ENSMUSG00000114863 | 8,89E-01  | -1,997980034 | 1,48E+00  | 2,24E-01 | 5,50E-01 | AC164116.2 | 1,85 | No  |
| ENSMUSG00000114864 | -1,23E+00 | -2,655067903 | 1,45E+00  | 2,29E-01 | 5,50E-01 | AC112157.1 | 0,43 | No  |
| ENSMUSG00000114865 | -1,19E+00 | -2,226307021 | 1,84E+00  | 1,75E-01 | 5,33E-01 | CT009512.1 | 0,44 | No  |
| ENSMUSG00000114869 | -1,49E+00 | -2,497602886 | 2,28E+00  | 1,31E-01 | 4,55E-01 | AC159196.3 | 0,36 | No  |
| ENSMUSG00000114870 | 3,13E+00  | -2,801021534 | 4,01E+00  | 4,54E-02 | 2,54E-01 | AC163667.3 | 8,77 | No  |
| ENSMUSG00000114871 | -5,51E-02 | 2,753848753  | 2,09E-01  | 6,48E-01 | 8,75E-01 | AC238811.3 | 0,96 | No  |
| ENSMUSG00000114872 | 4,78E-01  | -2,226241756 | 3,10E-01  | 5,78E-01 | 8,35E-01 | CT009494.1 | 1,39 | No  |
| ENSMUSG00000114873 | -7,38E-02 | -3,033659033 | 2,66E-03  | 9,59E-01 | 1,00E+00 | AC154849.4 | 0,95 | No  |
| ENSMUSG00000114875 | 8,66E-01  | -2,60072273  | 9,03E-01  | 3,42E-01 | 6,42E-01 | AC115122.1 | 1,82 | No  |
| ENSMUSG00000114880 | -1,27E+00 | -3,146104694 | 7,49E-01  | 3,87E-01 | 6,87E-01 | AC163638.2 | 0,42 | No  |
| ENSMUSG00000114882 | 1,87E+00  | -3,107639691 | 1,38E+00  | 2,40E-01 | 5,50E-01 | AC154171.2 | 3,67 | No  |
| ENSMUSG00000114883 | -1,94E-02 | -0,372511266 | 3,37E-03  | 9,54E-01 | 1,00E+00 | CT025689.6 | 0,99 | No  |
| ENSMUSG00000114884 | 3,17E+00  | -2,831988191 | 4,10E+00  | 4,29E-02 | 2,46E-01 | AC168059.2 | 9,01 | No  |
| ENSMUSG00000114886 | 6,47E-02  | 0,095253343  | 4,67E-02  | 8,29E-01 | 9,76E-01 | AC163038.3 | 1,05 | No  |
| ENSMUSG00000114887 | 1,93E-01  | -2,268090474 | 4,70E-02  | 8,28E-01 | 9,76E-01 | CT030194.2 | 1,14 | No  |
| ENSMUSG00000114888 | -3,78E-01 | -2,448739885 | 1,80E-01  | 6,71E-01 | 8,89E-01 | AC140462.2 | 0,77 | No  |
| ENSMUSG00000114891 | -2,29E+00 | -2,355613992 | 4,29E+00  | 3,83E-02 | 2,32E-01 | AC117949.2 | 0,20 | No  |
| ENSMUSG00000114893 | 1,86E+00  | -2,831989055 | 1,35E+00  | 2,46E-01 | 5,50E-01 | AC154257.2 | 3,63 | No  |
| ENSMUSG00000114894 | 1,97E-01  | -2,448698031 | 5,83E-02  | 8,09E-01 | 9,65E-01 | CU024892.2 | 1,15 | No  |
| ENSMUSG00000114902 | 8,31E-01  | -2,548157153 | 6,02E-01  | 4,38E-01 | 7,31E-01 | CT009550.1 | 1,78 | No  |
| ENSMUSG00000114903 | -4,95E-01 | -2,929324528 | 1,23E-01  | 7,25E-01 | 9,18E-01 | AC134869.4 | 0,71 | No  |
| ENSMUSG00000114905 | 4,79E-01  | -2,226277814 | 3,11E-01  | 5,77E-01 | 8,35E-01 | AC159256.1 | 1,39 | No  |
| ENSMUSG00000114906 | -2,07E+00 | -2,600629801 | 3,24E+00  | 7,20E-02 | 3,40E-01 | AC165092.3 | 0,24 | No  |
| ENSMUSG00000114907 | -2,44E-01 | -1,236599328 | 2,51E-01  | 6,17E-01 | 8,55E-01 | AC173482.6 | 0,84 | No  |
| ENSMUSG00000114914 | -5,50E-01 | -2,655098175 | 2,37E-01  | 6,27E-01 | 8,60E-01 | AC167669.4 | 0,68 | No  |
| ENSMUSG00000114922 | 9,36E-02  | 0,901900831  | 2,02E-01  | 6,53E-01 | 8,78E-01 | AC154759.1 | 1,07 | No  |
| ENSMUSG00000114923 | -6,29E-02 | 1,877853522  | 1,62E-01  | 6,87E-01 | 8,98E-01 | CT573016.1 | 0,96 | No  |
| ENSMUSG00000114924 | 1,85E+00  | -3,107657832 | 1,35E+00  | 2,46E-01 | 5,50E-01 | AC154461.6 | 3,61 | No  |
| ENSMUSG00000114926 | 9,01E-03  | -3,107646452 | -5,16E-10 | 1,00E+00 | 1,00E+00 | AC124581.4 | 1,01 | No  |
| ENSMUSG00000114931 | -1,19E+00 | -2,355542723 | 1,83E+00  | 1,76E-01 | 5,35E-01 | AC135377.1 | 0,44 | No  |
| ENSMUSG00000114932 | 2,64E+00  | -2,963257704 | 2,69E+00  | 1,01E-01 | 3,92E-01 | AC154680.1 | 6,23 | No  |
| ENSMUSG00000114934 | 3,19E-01  | 3,437644499  | 1,03E+01  | 1,36E-03 | 2,07E-02 | AC123738.2 | 1,25 | Yes |



|                    |           |              |           |          |          |            |      |    |
|--------------------|-----------|--------------|-----------|----------|----------|------------|------|----|
| ENSMUSG00000114935 | 3,15E-01  | -2,655128089 | 1,01E-01  | 7,50E-01 | 9,31E-01 | AC110817.1 | 1,24 | No |
| ENSMUSG00000114936 | -5,81E-02 | -2,96326685  | 1,89E-03  | 9,65E-01 | 1,00E+00 | AC123834.2 | 0,96 | No |
| ENSMUSG00000114937 | -4,99E-02 | 0,214217693  | 3,56E-02  | 8,50E-01 | 9,90E-01 | AC121801.1 | 0,97 | No |
| ENSMUSG00000114940 | -3,23E-02 | 3,098364407  | 8,91E-02  | 7,65E-01 | 9,40E-01 | AC238940.3 | 0,98 | No |
| ENSMUSG00000114942 | 1,31E-01  | 3,605700258  | 1,76E+00  | 1,84E-01 | 5,48E-01 | Lats2      | 1,09 | No |
| ENSMUSG00000114943 | 1,81E+00  | -3,10765737  | 1,28E+00  | 2,58E-01 | 5,50E-01 | AC113282.5 | 3,49 | No |
| ENSMUSG00000114945 | -6,94E-01 | -1,627594528 | 1,46E+00  | 2,27E-01 | 5,50E-01 | AC241593.2 | 0,62 | No |
| ENSMUSG00000114949 | 4,17E-01  | -2,77066245  | 1,35E-01  | 7,14E-01 | 9,12E-01 | AC125223.3 | 1,33 | No |
| ENSMUSG00000114951 | 9,66E-03  | 3,051438412  | 7,75E-03  | 9,30E-01 | 1,00E+00 | AC238811.4 | 1,01 | No |
| ENSMUSG00000114961 | 9,01E-03  | -3,107646452 | -5,16E-10 | 1,00E+00 | 1,00E+00 | AC154171.3 | 1,01 | No |
| ENSMUSG00000114962 | 1,69E-01  | 1,206336513  | 7,73E-01  | 3,79E-01 | 6,80E-01 | AC126939.4 | 1,12 | No |
| ENSMUSG00000114963 | -8,75E-02 | -2,832049905 | 3,19E-03  | 9,55E-01 | 1,00E+00 | AL844586.1 | 0,94 | No |
| ENSMUSG00000114965 | 1,85E+00  | -3,107657832 | 1,35E+00  | 2,46E-01 | 5,50E-01 | CT025626.1 | 3,61 | No |
| ENSMUSG00000114968 | -9,48E-01 | -2,683099609 | 7,88E-01  | 3,75E-01 | 6,76E-01 | AC130217.2 | 0,52 | No |
