# Supplementary material
Source: PubMed Central journal article supplement (PMC11072169)
Supplement: 18_2021_4027_MOESM6_ESM.pdf [file 18_2021_4027_MOESM6_ESM.pdf]

| <b>Molecular Functions GO Analysis</b> |                                                                       |
|----------------------------------------|-----------------------------------------------------------------------|
| <b>ID</b>                              | <b>Description</b>                                                    |
| GO:0003779                             | actin binding                                                         |
| GO:0030246                             | carbohydrate binding                                                  |
| GO:0061134                             | peptidase regulator activity                                          |
| GO:0050839                             | cell adhesion molecule binding                                        |
| GO:0051015                             | actin filament binding                                                |
| GO:0005201                             | extracellular matrix structural constituent                           |
| GO:0016810                             | hydrolase activity, acting on carbon-nitrogen (but not peptide) bonds |
| GO:0005178                             | integrin binding                                                      |
| GO:0048029                             | monosaccharide binding                                                |
| GO:0031418                             | L-ascorbic acid binding                                               |

| <b>Biological Processes Go Analysis (simplified)</b> |                                                   |
|------------------------------------------------------|---------------------------------------------------|
| <b>ID</b>                                            | <b>Description</b>                                |
| GO:0031589                                           | cell-substrate adhesion                           |
| GO:0006874                                           | cellular calcium ion homeostasis                  |
| GO:0198738                                           | cell-cell signaling by wnt                        |
| GO:0150063                                           | visual system development                         |
| GO:0097746                                           | regulation of blood vessel diameter               |
| GO:0120162                                           | positive regulation of cold-induced thermogenesis |
| GO:1905523                                           | positive regulation of macrophage migration       |
| GO:0098883                                           | synapse pruning                                   |

| <b>GeneRatio</b> | <b>BgRatio</b> | <b>p.adjust</b> | <b>qvalue</b> |
|------------------|----------------|-----------------|---------------|
| 19/382           | 427/20775      | 3,41E-02        | 2,92E-02      |
| 19/382           | 269/20775      | 4,59E-04        | 3,93E-04      |
| 13/382           | 239/20775      | 3,62E-02        | 3,11E-02      |
| 13/382           | 239/20775      | 3,62E-02        | 3,11E-02      |
| 12/382           | 198/20775      | 3,41E-02        | 2,92E-02      |
| 12/382           | 141/20775      | 4,22E-03        | 3,62E-03      |
| 10/382           | 133/20775      | 2,53E-02        | 2,17E-02      |
| 10/382           | 128/20775      | 2,53E-02        | 2,17E-02      |
| 8/382            | 85/20775       | 2,53E-02        | 2,17E-02      |
| 4/382            | 19/20775       | 3,41E-02        | 2,92E-02      |

| <b>GeneRatio</b> | <b>BgRatio</b> | <b>p.adjust</b> | <b>qvalue</b> |
|------------------|----------------|-----------------|---------------|
| 24/387           | 340/21077      | 9,56E-05        | 7,83E-05      |
| 21/387           | 477/21077      | 1,55E-02        | 1,27E-02      |
| 18/387           | 432/21077      | 3,12E-02        | 2,56E-02      |
| 17/387           | 392/21077      | 2,99E-02        | 2,45E-02      |
| 10/387           | 160/21077      | 2,75E-02        | 2,25E-02      |
| 7/387            | 97/21077       | 4,23E-02        | 3,47E-02      |
| 4/387            | 27/21077       | 3,58E-02        | 2,93E-02      |
| 3/387            | 7/21077        | 1,47E-02        | 1,20E-02      |
